# Supplementary material for: The developmental proteome of Drosophila melanogaster
Source: HighWire-hosted journal article supplement (doi:10.1101/gr.213694.116), 2017-04-05
Supplement: Supplemental_Tables.zip [file Supplemental_Table_S2.xlsx]

## Sheet: ELPA
GOBPID	Pvalue	OddsRatio	ExpCount	Count	Size	Term	FDR	genes
GO:0009987	6.77955e-156	3.03544	2516.84	3177	7689	cellular process	9.58628e-153	CG9577; CG9578; Rab35; alpha-Cat; CG32230; CkIIalpha; NA; cin; arg; elav; CG17896; CG18273; CG3038; Appl; l(1)1Bi; Roc1a; SkpA; sdk; CG5254; Sec22; Rbf; RpL22; RpL36; CG13366; TRAM; CG3699; CG11412; AMPKalpha; CG11448; CG14786; CG3719; CG12773; CG11418; DAAM; pck; rush; inc; dor; sta; Ns3; MED18; Vps26; mRpL16; mip130; Rbcn-3B; Ocrl; east; CG4045; CG4199; Actn; usp; CG4406; eIF2B-epsilon; Edem1; …
GO:0008152	8.79053e-124	2.50018	1932.88	2549	5905	metabolic process	6.21491e-121	CG9577; CG32230; CkIIalpha; NA; CG14476; cin; arg; elav; CG17896; Cyp4g1; CG3038; CG13369; l(1)1Bi; Roc1a; SkpA; Rbf; RpL22; RpL36; CG14630; CG3699; CG11412; AMPKalpha; CG14786; CG3719; CG11418; dor; sta; MED18; mRpL16; mip130; Ocrl; east; CG4045; CG4199; usp; CG4406; eIF2B-epsilon; Edem1; Pgam5; CG14812; csw; CG3835; Pgd; CG3621; pn; CG3071; mRpL14; CG2918; crn; msta; Cyp4d14; wds; Zw10; CG8636;…
GO:0071840	9.24444e-116	2.73975	927.325	1440	2833	cellular component organization or biogenesis	4.35721e-113	alpha-Cat; CkIIalpha; NA; Appl; SkpA; Sec22; Rbf; RpL22; CG13366; TRAM; CG11412; AMPKalpha; CG11448; CG14786; DAAM; pck; rush; inc; dor; sta; Ns3; Vps26; mip130; Ocrl; east; Actn; usp; Pgam5; Pex5; csw; pn; CG3071; crn; Vinc; Nmd3; wds; Zw10; CG8636; sgg; ttm50; Rala; CG2875; Vap-33A; lva; cib; CG2982; mei-9; Femcoat; Fas2; CG3527; rb; ctp; Ptp4E; Cdk7; Mcm3; RhoGAP5A; spoon; RpL35; CG4078; Act5C…
GO:0044237	9.11255e-108	2.37067	1522.08	2084	4650	cellular metabolic process	3.22129e-105	CG9577; CG32230; CkIIalpha; cin; arg; elav; CG17896; CG3038; l(1)1Bi; Roc1a; SkpA; Rbf; RpL22; RpL36; CG3699; CG11412; AMPKalpha; CG14786; CG11418; dor; sta; MED18; mRpL16; mip130; Ocrl; CG4045; usp; CG4406; eIF2B-epsilon; Edem1; Pgam5; CG14812; csw; Pgd; CG3621; pn; CG3071; mRpL14; CG2918; crn; wds; Zw10; CG8636; tko; sgg; eIF2B-beta; ttm50; CG2685; CG10802; Rala; NA; Vap-33A; CG6428; tyf; GlcAT…
GO:0016043	1.17899e-105	2.63664	905.721	1391	2767	cellular component organization	3.3342e-103	alpha-Cat; CkIIalpha; NA; Appl; SkpA; Sec22; Rbf; RpL22; CG13366; TRAM; CG11412; AMPKalpha; CG11448; CG14786; DAAM; pck; rush; inc; dor; sta; Vps26; mip130; Ocrl; east; Actn; usp; Pgam5; Pex5; csw; pn; crn; Vinc; wds; Zw10; CG8636; sgg; ttm50; Rala; Vap-33A; lva; cib; CG2982; mei-9; Femcoat; Fas2; rb; ctp; Ptp4E; Cdk7; Mcm3; RhoGAP5A; spoon; RpL35; CG4078; Act5C; GAA1; MAPk-Ak2; Rab18; sqh; Marf;…
GO:0043933	1.1861e-102	4.22545	330.603	650	1010	macromolecular complex subunit organization	2.79524e-100	RpL22; CG11412; DAAM; inc; dor; sta; mip130; Actn; wds; CG8636; sgg; Vap-33A; cib; CG2982; ctp; Mcm3; spoon; RpL35; Act5C; sqh; RpL7A; Mcm6; RpL17; CG3198; sn; mys; RpS6; CG10932; Rbm13; Moe; HP1b; CG7033; AP-1gamma; dalao; c12.1; NA; Prosalpha3; cpa; tud; Sgf29; LSm1; NC2alpha; HmgD; RpS16; RpL23; Nup214; Dcp-1; Lpt; eIF-5A; RpL12; RpL39; gammaSnap1; tsr; HSPC300; CG3803; Nap1; DCP1; Pym; eIF6; …
GO:0044763	4.40978e-101	2.27836	1885.09	2441	5759	single-organism cellular process	8.90776e-99	CG9577; CG9578; Rab35; alpha-Cat; CG32230; CkIIalpha; arg; CG17896; CG18273; CG3038; Appl; Roc1a; SkpA; sdk; CG5254; Sec22; Rbf; RpL22; CG13366; TRAM; CG3699; CG11412; AMPKalpha; CG11448; CG14786; CG3719; CG12773; DAAM; pck; rush; dor; sta; Ns3; mip130; Rbcn-3B; Ocrl; east; CG4199; Actn; usp; CG4406; Edem1; Pex5; deltaCOP; CG14812; csw; Pgd; CG3621; pn; Mct1; CG3071; crn; kz; Vinc; Nmd3; wds; Zw1…
GO:0044710	4.97498e-95	2.76059	681.173	1096	2081	single-organism metabolic process	8.79328e-93	CG9577; CG32230; arg; CG17896; Cyp4g1; CG3038; CG13369; SkpA; Rbf; CG14630; CG3699; CG11412; AMPKalpha; CG14786; CG3719; dor; mip130; Ocrl; CG4199; usp; CG4406; Edem1; CG3835; Pgd; CG3621; pn; Cyp4d14; wds; Zw10; sgg; CG10802; Rala; Vap-33A; CG6428; GlcAT-I; CG2982; CG3626; mei-9; Cbp80; rb; l(1)G0334; Mcm3; XRCC1; RhoGAP5A; spoon; CG4078; CG3011; GAA1; MAPk-Ak2; CG3160; CG5966; kdn; Marf; Spat; …
GO:0006996	2.00889e-89	2.8146	598.686	981	1829	organelle organization	3.15619e-87	alpha-Cat; CkIIalpha; SkpA; Sec22; RpL22; CG13366; CG11412; CG14786; DAAM; rush; dor; sta; Vps26; mip130; Ocrl; east; Actn; Pgam5; Pex5; pn; crn; Vinc; wds; Zw10; CG8636; sgg; ttm50; Vap-33A; cib; CG2982; mei-9; rb; ctp; Cdk7; spoon; RpL35; CG4078; Act5C; GAA1; sqh; Marf; RpL7A; Top3beta; RpL17; cm; Tom40; NELF-B; p115; sn; mys; RpS6; CG10932; Rbm13; Moe; HP1b; CG7033; AP-1gamma; dalao; ric8a; c1…
GO:0071704	4.33185e-83	2.10639	1735.5	2236	5302	organic substance metabolic process	6.12524e-81	CG9577; CG32230; CkIIalpha; CG14476; cin; arg; elav; CG17896; Cyp4g1; CG3038; CG13369; l(1)1Bi; Roc1a; SkpA; Rbf; RpL22; RpL36; CG3699; CG11412; AMPKalpha; CG14786; CG3719; CG11418; dor; sta; MED18; mRpL16; mip130; Ocrl; east; CG4045; usp; CG4406; eIF2B-epsilon; Edem1; Pgam5; CG14812; csw; Pgd; CG3621; pn; CG3071; mRpL14; CG2918; crn; msta; wds; Zw10; CG8636; tko; sgg; eIF2B-beta; ttm50; CG2685; …
GO:0071822	7.99789e-79	4.65397	217.02	447	663	protein complex subunit organization	1.02809e-76	RpL22; DAAM; inc; dor; sta; mip130; Actn; CG8636; sgg; Vap-33A; cib; ctp; spoon; RpL35; sqh; RpL7A; RpL17; sn; mys; RpS6; CG10932; Rbm13; Moe; CG7033; AP-1gamma; c12.1; Prosalpha3; cpa; NC2alpha; RpS16; RpL23; Nup214; Dcp-1; eIF-5A; RpL12; RpL39; gammaSnap1; tsr; HSPC300; CG3803; Nap1; Pym; betaTub60D; gek; Rpn8; Nurf-38; slik; zip; RpL19; fwd; E(bx); CG13900; Sac1; Rac1; Klp61F; CG12018; alpha-S…
GO:0051641	1.47387e-74	3.59695	296.233	554	905	cellular localization	1.73671e-72	Rab35; alpha-Cat; CkIIalpha; CG4293; CG5254; Sec22; TRAM; rush; dor; sta; Ns3; Vps26; Ocrl; east; Actn; Pex5; deltaCOP; Vinc; Nmd3; Zw10; sgg; Vap-33A; lva; CHOp24; Torsin; rb; ctp; spoon; Act5C; GAA1; CG32758; CG3160; sqh; Marf; nonC; cm; Tom40; p115; Ykt6; Crag; Ppt1; Moe; AP-1gamma; ric8a; CG16892; fh; RpS28b; Gga; flw; Tango5; Act57B; sktl; mago; tud; CG10320; Tim10; Tango11; Synj; Vps35; GM1…
GO:0051649	6.33072e-72	3.92183	248.443	482	759	establishment of localization in cell	6.88587e-70	Rab35; CG4293; CG5254; Sec22; TRAM; rush; dor; sta; Ns3; Vps26; east; Pex5; deltaCOP; Nmd3; Zw10; sgg; Vap-33A; lva; CHOp24; Torsin; rb; ctp; GAA1; CG32758; CG3160; sqh; Marf; nonC; cm; Tom40; p115; Ykt6; Crag; Ppt1; Moe; AP-1gamma; ric8a; CG16892; fh; RpS28b; Gga; flw; Tango5; Act57B; mago; tud; CG10320; Tim10; Tango11; Synj; Vps35; GM130; Vps20; CycB; Nup214; Golgin245; Dcp-1; gbb; thoc5; or; g…
GO:0044238	4.67612e-70	1.98612	1616.35	2071	4938	primary metabolic process	4.72288e-68	CG9577; CG32230; CkIIalpha; CG14476; cin; arg; elav; CG17896; Cyp4g1; CG3038; CG13369; l(1)1Bi; Roc1a; SkpA; Rbf; RpL22; RpL36; CG3699; CG11412; AMPKalpha; CG14786; CG11418; dor; sta; MED18; mRpL16; mip130; Ocrl; CG4045; usp; CG4406; eIF2B-epsilon; Edem1; Pgam5; CG14812; csw; Pgd; CG3621; pn; CG3071; mRpL14; CG2918; crn; wds; Zw10; CG8636; tko; sgg; eIF2B-beta; ttm50; CG2685; CG2658; CG10802; Ral…
GO:0046907	1.55608e-69	4.90671	177.74	374	543	intracellular transport	1.46687e-67	CG4293; CG5254; Sec22; TRAM; rush; dor; sta; Ns3; Vps26; Pex5; deltaCOP; Nmd3; Zw10; sgg; Vap-33A; CHOp24; Torsin; rb; GAA1; CG32758; CG3160; sqh; Marf; cm; Tom40; p115; Ykt6; Crag; AP-1gamma; CG16892; fh; RpS28b; Gga; Act57B; mago; tud; CG10320; Tim10; Vps35; GM130; Vps20; Nup214; Golgin245; Dcp-1; thoc5; or; gammaSnap1; Nxt1; Letm1; thoc7; CG13887; Vti1; Sac1; CG7967; alphaCOP; gry; kst; mge; C…
GO:0044281	1.02743e-60	3.40982	257.609	475	787	small molecule metabolic process	9.07989e-59	CG9577; CG32230; arg; CG17896; CG13369; CG3699; CG14786; CG3719; usp; Pgd; CG3621; pn; CG10802; CG6428; GlcAT-I; l(1)G0334; spoon; CG3011; kdn; Marf; Spat; CG3446; l(1)G0255; COQ7; CG3192; CG4586; Pdp; sws; CG18624; CG10932; ND75; CG2263; CG12065; e(r); su(r); fh; Hex-A; Aats-lys; l(1)G0230; Gip; ras; Acox57D-p; Acox57D-d; CG4302; CG10320; Ppcdc; blw; CG13551; CG30185; levy; Tal; Galphas; Thiolas…
GO:1902582	1.55783e-58	4.70427	155.482	324	475	single-organism intracellular transport	1.29575e-56	CG4293; CG5254; Sec22; TRAM; rush; dor; sta; Ns3; Vps26; Pex5; deltaCOP; Nmd3; Zw10; sgg; Vap-33A; CHOp24; Torsin; GAA1; CG32758; sqh; Marf; Tom40; p115; Ykt6; Crag; fh; RpS28b; Gga; Act57B; mago; tud; Tim10; Vps35; GM130; Vps20; Nup214; Golgin245; Dcp-1; thoc5; Nxt1; Letm1; thoc7; Sac1; CG7967; alphaCOP; kst; Ccz1; pav; CG32250; Syx17; sbr; sesB; Hsp60; Dlic; hop; Gtp-bp; Tim8; p24-1; Tomosyn; c…
GO:0044085	1.82669e-58	2.90008	335.186	575	1024	cellular component biogenesis	1.39666e-56	NA; SkpA; Rbf; CG13366; DAAM; pck; inc; dor; sta; Ns3; mip130; Ocrl; Actn; CG3071; Nmd3; sgg; CG2875; Vap-33A; Femcoat; Fas2; CG3527; ctp; Mcm3; spoon; GAA1; sqh; RpL7A; Top3beta; Mcm6; CG3198; bou; sn; mys; RpS6; slpr; Cp36; Nrg; Crag; Moe; HP1b; CG7033; AP-1gamma; fh; RpS28b; CG2972; Prosalpha3; cpa; shg; mago; tud; LSm1; CG4038; Egfr; NC2alpha; Rae1; Fib; Nup214; gbb; gammaSnap1; tsr; HSPC300;…
GO:0044699	1.87671e-58	1.90792	2470.03	2877	7546	single-organism process	1.39666e-56	CG9577; CG9578; Rab35; alpha-Cat; CG32230; CkIIalpha; cin; arg; CG4293; elav; CG17896; CG18273; Cyp4g1; CG3038; Appl; CG13369; Roc1a; SkpA; sdk; CG5254; Sec22; Rbf; RpL22; CG13366; TRAM; CG14630; CG3699; CG11412; AMPKalpha; CG11448; CG14786; CG3719; CG12773; DAAM; CG3638; pck; rush; inc; dor; sta; Ns3; Vps26; mip130; Rbcn-3B; Ocrl; east; CG4199; Actn; usp; CG4406; Edem1; Pex5; deltaCOP; CG14812; …
GO:0016192	3.71315e-54	3.85863	186.578	363	570	vesicle-mediated transport	2.6252e-52	Rab35; CG4293; Sec22; TRAM; AMPKalpha; CG3638; rush; dor; Vps26; Ocrl; deltaCOP; csw; Vinc; Zw10; Vap-33A; CHOp24; rb; Act5C; GAA1; Rab18; nonC; cm; Rab39; p115; Ykt6; CG2258; CG10778; Crag; Ppt1; Moe; AP-1gamma; CG17754; Gga; l(1)G0232; ras; cpa; Synj; Vps35; GM130; blw; Golgin245; Lpt; or; gammaSnap1; Chi; Snap29; Eps-15; RabX6; Vti1; Rac1; Cct1; alphaCOP; nSyb; Pxn; kst; Ubi-p63E; Ccz1; Rop; S…
GO:0033036	5.86264e-54	3.39359	227.822	421	696	macromolecule localization	3.94751e-52	Rab35; alpha-Cat; CkIIalpha; Roc1a; TRAM; AMPKalpha; dor; sta; Vps26; Actn; Pex5; deltaCOP; Vinc; sgg; ttm50; CHOp24; Cbp80; rb; spoon; Act5C; GAA1; CG32758; CG3160; Rab18; cm; Rab39; Tom40; p115; Crag; Moe; AP-1gamma; ric8a; RpS28b; Gga; Tango5; Act57B; shg; sktl; mago; tud; CG30392; Sara; CG10320; Tim10; Tango11; Vps35; Swim; blw; Nup214; Golgin245; thoc5; or; Rap2l; gammaSnap1; DCP1; Nxt1; zip…
GO:0065003	9.96559e-52	4.64168	138.46	288	423	macromolecular complex assembly	6.40515e-50	DAAM; inc; dor; sta; mip130; Vap-33A; Mcm3; spoon; sqh; Mcm6; CG3198; HP1b; CG7033; AP-1gamma; Prosalpha3; cpa; LSm1; NC2alpha; Nup214; gammaSnap1; tsr; HSPC300; CG3803; Nap1; DCP1; eIF6; betaTub60D; zip; E(bx); pUf68; Klp61F; CG16985; CG16986; Non2; Hsp83; CG12082; pav; CG11583; Rop; Klp10A; Tomosyn; CG12096; Bap60; comt; Rbp1-like; Tcp-1zeta; CG9172; U2af50; eIF-2alpha; Arpc3B; car; Cdc42; Grip…
GO:0007010	2.30997e-51	3.34357	221.275	407	676	cytoskeleton organization	1.42013e-49	alpha-Cat; SkpA; RpL22; CG13366; DAAM; sta; mip130; Ocrl; Actn; crn; Vinc; CG8636; sgg; Vap-33A; cib; ctp; spoon; RpL35; Act5C; sqh; RpL7A; RpL17; sn; mys; RpS6; CG10932; Rbm13; Moe; CG7033; ric8a; c12.1; Act57B; Prosalpha3; cpa; sktl; mago; Rae1; RpS16; RpL23; CycB; Fib; Dcp-1; RpL12; RpL39; tsr; gek; Rpn8; slik; zip; RpL19; fwd; Cdc5; CG13900; trio; Sac1; Rac1; Klp61F; CG12018; alpha-Spec; RpL2…
GO:0008104	1.8492e-50	3.88788	170.866	334	522	protein localization	1.08948e-48	Rab35; alpha-Cat; TRAM; dor; Vps26; Actn; Pex5; deltaCOP; Vinc; sgg; ttm50; CHOp24; rb; spoon; Act5C; GAA1; CG32758; CG3160; Rab18; cm; Rab39; Tom40; p115; Crag; Moe; AP-1gamma; ric8a; Gga; Tango5; Act57B; shg; sktl; mago; Sara; Tim10; Tango11; Vps35; Swim; Nup214; Golgin245; or; Rap2l; gammaSnap1; Nxt1; zip; CG13887; Vti1; Klp61F; Patj; alphaCOP; CG14977; mge; pav; Hsp60; CG1657; dsh; hop; Ran; …
GO:0034613	3.54992e-48	5.22427	111.947	242	342	cellular protein localization	2.00784e-46	alpha-Cat; TRAM; dor; Vps26; Actn; Pex5; Vinc; sgg; CHOp24; rb; Act5C; GAA1; CG32758; CG3160; cm; Tom40; p115; Crag; AP-1gamma; Gga; Act57B; sktl; Tim10; Nup214; Golgin245; or; gammaSnap1; Nxt1; zip; CG13887; Vti1; alphaCOP; CG14977; mge; pav; Hsp60; hop; Ran; Gtp-bp; Tim8; Tim9a; Nup93-1; g; Gmap; shi; exd; Stim; Ranbp16; Chc; Nup153; Rok; X11L; betaCOP; fu; car; Cdc42; Ranbp21; Tim9b; AP-1-2bet…
GO:0022607	4.57383e-47	2.68669	308.017	514	941	cellular component assembly	2.48746e-45	NA; SkpA; Rbf; CG13366; DAAM; pck; inc; dor; sta; mip130; Ocrl; Actn; sgg; Vap-33A; Femcoat; Fas2; ctp; Mcm3; spoon; sqh; Top3beta; Mcm6; CG3198; bou; sn; mys; slpr; Cp36; Nrg; Crag; Moe; HP1b; CG7033; AP-1gamma; fh; Prosalpha3; cpa; shg; mago; tud; LSm1; Egfr; NC2alpha; Rae1; Nup214; gbb; gammaSnap1; tsr; HSPC300; CG3803; Nap1; DCP1; eIF6; betaTub60D; zip; Eps-15; Pdk1; E(bx); trio; pUf68; Rac1;…
GO:0022008	1.40144e-46	2.27168	466.772	712	1426	neurogenesis	7.33938e-45	CkIIalpha; CG18273; Appl; Roc1a; SkpA; sdk; AMPKalpha; CG11448; DAAM; pck; rush; usp; csw; crn; kz; Vinc; Nmd3; wds; Zw10; Rala; CG2875; lva; Fas2; CG3527; Cbp80; ctp; Ptp4E; Sas10; Mcm3; GAA1; sqh; CG4593; cm; ct; bys; sn; mys; Trxr-1; CG2260; Nrg; Ppt1; CG1785; Rbm13; Moe; l(1)G0020; CG32708; CG7033; ric8a; Ost48; CG7246; l(1)G0232; Yp2; CG2972; PPP4R2r; Psf3; ras; shg; CG4038; Egfr; HmgD; GM13…
GO:0006333	4.83313e-46	15.068	50.4088	135	154	chromatin assembly or disassembly	2.44073e-44	HP1b; NA; Nap1; Ssrp; E(bx); dre4; Bap60; asf1; Chd3; Trl; Su(var)205; Caf1; Set; XNP; His2Av; Nlp; Acf1; Df31; mle; Dp1; P32; Su(var)2-HP2; Iswi; His1:CG33807; His1:CG33834; Chrac-14
GO:0007399	1.36086e-45	2.14744	540.421	798	1651	nervous system development	6.63536e-44	CkIIalpha; elav; CG18273; Appl; Roc1a; SkpA; sdk; AMPKalpha; CG11448; DAAM; CG3638; pck; rush; usp; csw; crn; kz; Vinc; Nmd3; wds; Zw10; sgg; Rala; CG2875; Vap-33A; lva; cib; Fas2; CG3527; Cbp80; ctp; Ptp4E; Sas10; Rnp4F; Mcm3; Act5C; GAA1; sqh; Top3beta; CG4593; cm; ogre; ct; bys; sn; mys; sws; Trxr-1; CG2260; Nrg; Ppt1; CG1785; Rbm13; Moe; l(1)G0020; CG32708; CG7033; ric8a; Ost48; CG7246; l(1)G…
GO:0065007	4.24391e-45	1.78907	1174.79	1512	3589	biological regulation	2.0003e-43	Rab35; alpha-Cat; CkIIalpha; elav; Appl; Roc1a; SkpA; sdk; Rbf; RpL22; AMPKalpha; CG14786; CG3719; DAAM; pck; inc; dor; Ns3; MED18; mip130; Rbcn-3B; Ocrl; east; CG4199; Actn; usp; Edem1; Pgam5; deltaCOP; CG14812; csw; Pgd; pn; CG3071; crn; Vinc; msta; wds; Zw10; CG8636; sgg; eIF2B-beta; CG32795; Rala; VhaAC39-1; Vap-33A; lva; tyf; CG2982; mei-9; Fas2; CHOp24; CG3527; Cbp80; Torsin; rb; snf; Cdk7;…
GO:0006950	5.22463e-45	2.42763	373.156	592	1140	response to stress	2.3831e-43	CG9578; CkIIalpha; Appl; SkpA; Rbf; ssx; AMPKalpha; dor; Ns3; usp; Edem1; Pgam5; CG3071; Nmd3; wds; tko; sgg; eIF2B-beta; CG32795; Rala; Vap-33A; tyf; mei-9; CG3527; Mcm3; XRCC1; CG4078; MAPk-Ak2; sqh; Marf; schlank; CBP; Atg5; Tom40; sn; Gclc; Trxr-1; slpr; Nrg; Crag; l(1)G0020; Dsor1; fh; CG7246; CG2972; flw; Atg8a; cpa; shg; CG4038; Egfr; Tim10; CG10433; CycB; Cdk9; Fib; CG13551; Dcp-1; Sesn; …
GO:0070271	2.63116e-44	4.74564	114.238	240	349	protein complex biogenesis	1.16264e-42	DAAM; inc; dor; mip130; Vap-33A; spoon; sqh; CG7033; AP-1gamma; Prosalpha3; cpa; NC2alpha; Nup214; gammaSnap1; tsr; HSPC300; CG3803; Nap1; betaTub60D; zip; E(bx); Klp61F; CG16985; CG16986; Non2; Hsp83; CG12082; pav; Rop; Klp10A; Tomosyn; CG12096; comt; Rbp1-like; Tcp-1zeta; CG9172; Arpc3B; car; Cdc42; Grip84; polo; alphaSnap; asf1; mop; Trl; Gl; flr; CG6404; Dronc; Klp67A; CG4942; Arp3; pbl; CG75…
GO:1903047	3.48378e-44	3.43223	179.377	335	548	mitotic cell cycle process	1.49275e-42	Rab35; CkIIalpha; SkpA; Rbf; RpL22; sta; mip130; Ocrl; wds; Zw10; CG8636; sgg; ttm50; mei-9; ctp; Cdk7; Mcm3; RpL35; Act5C; sqh; RpL7A; PpV; RpL17; NELF-B; RpS6; CG10932; Rbm13; Moe; CG7033; Dsor1; ric8a; c12.1; Act57B; Prosalpha3; Egfr; Rae1; RpS16; RpL23; CycB; pita; RpL12; RpL39; tsr; Rpn8; CG11414; slik; zip; RpL19; E(bx); CG13900; Psf1; Klp61F; CG12018; RpL8; Non2; Hsp83; kst; RpL28; ida; Rc…
GO:0006461	5.68629e-44	4.74777	113.256	238	346	protein complex assembly	2.36483e-42	DAAM; inc; dor; mip130; Vap-33A; spoon; sqh; CG7033; AP-1gamma; Prosalpha3; cpa; NC2alpha; Nup214; gammaSnap1; tsr; HSPC300; CG3803; Nap1; betaTub60D; zip; E(bx); Klp61F; CG16985; CG16986; Non2; Hsp83; CG12082; pav; Rop; Klp10A; Tomosyn; CG12096; comt; Rbp1-like; Tcp-1zeta; CG9172; Arpc3B; car; Cdc42; Grip84; polo; alphaSnap; asf1; mop; Trl; Gl; flr; CG6404; Dronc; Klp67A; CG4942; Arp3; pbl; CG75…
GO:0034622	1.23031e-43	5.45513	96.2349	211	294	cellular macromolecular complex assembly	4.97046e-42	DAAM; dor; sta; Vap-33A; Mcm3; spoon; sqh; Mcm6; CG3198; AP-1gamma; cpa; LSm1; NC2alpha; Nup214; gammaSnap1; tsr; CG3803; Nap1; DCP1; eIF6; betaTub60D; zip; E(bx); pUf68; Hsp83; CG12082; CG11583; Rop; Tomosyn; CG12096; comt; Rbp1-like; CG9172; U2af50; eIF-2alpha; Arpc3B; car; Cdc42; Grip84; pcm; polo; alphaSnap; asf1; CG7564; Smn; AGO2; Prp31; flr; eIF-2beta; CG6404; RpS17; CG4942; Mcm7; Unr; Arp…
GO:0070727	6.99832e-43	3.96804	139.115	275	425	cellular macromolecule localization	2.74878e-41	alpha-Cat; CkIIalpha; TRAM; dor; Vps26; Actn; Pex5; Vinc; sgg; CHOp24; rb; spoon; Act5C; GAA1; CG32758; CG3160; cm; Tom40; p115; Crag; AP-1gamma; Gga; Act57B; sktl; mago; tud; Tim10; Nup214; Golgin245; or; gammaSnap1; DCP1; Nxt1; zip; CG13887; Vti1; alphaCOP; Hsp83; CG14977; mge; pav; Rop; Hsp60; hop; Ran; Gtp-bp; Tim8; CkIIbeta; Tim9a; Nup93-1; g; Gmap; shi; exd; Stim; Ranbp16; Chc; Nup153; Rok;…
GO:0048731	2.09382e-42	1.88504	803.267	1092	2454	system development	8.00178e-41	CkIIalpha; elav; CG18273; Appl; Roc1a; SkpA; sdk; CG13366; AMPKalpha; CG11448; DAAM; CG3638; pck; rush; usp; deltaCOP; csw; pn; crn; kz; Vinc; Nmd3; wds; Zw10; sgg; Rala; CG2875; Vap-33A; lva; cib; Fas2; CHOp24; CG3527; Cbp80; ctp; Ptp4E; Sas10; Rnp4F; Mcm3; RhoGAP5A; Act5C; GAA1; CG5966; sqh; Top3beta; CG3226; bou; Inx2; CG4593; cm; ogre; ct; bys; sn; mys; fs(1)h; sws; Trxr-1; slpr; CG2260; Nrg;…
GO:0000226	2.30549e-42	3.89324	141.079	277	431	microtubule cytoskeleton organization	8.57884e-41	SkpA; RpL22; sta; mip130; crn; CG8636; sgg; Vap-33A; ctp; RpL35; RpL7A; RpL17; RpS6; CG10932; Rbm13; Moe; CG7033; ric8a; c12.1; Act57B; Prosalpha3; sktl; mago; Rae1; RpS16; RpL23; CycB; Fib; RpL12; RpL39; Rpn8; slik; RpL19; fwd; Cdc5; CG13900; Sac1; Klp61F; CG12018; alpha-Spec; RpL23A; RpL8; Non2; Hsp83; RpL28; Rcd5; pav; Dlic; Ran; Klp10A; dlg1; Hsc70-3; RpS15Aa; Tcp-1zeta; Chc; U2af50; Nup153; …
GO:0000278	8.29616e-42	3.06474	205.89	367	629	mitotic cell cycle	3.00789e-40	Rab35; CkIIalpha; SkpA; Rbf; RpL22; AMPKalpha; sta; mip130; Ocrl; csw; wds; Zw10; CG8636; sgg; ttm50; mei-9; ctp; Cdk7; Mcm3; RpL35; Act5C; sqh; RpL7A; PpV; RpL17; ct; NELF-B; RpS6; CG10932; Rbm13; Moe; CG7033; Dsor1; ric8a; c12.1; PPP4R2r; Act57B; Prosalpha3; Egfr; Rae1; RpS16; RpL23; CycB; Cdk9; CG3530; pita; RpL12; RpL39; tsr; Rpn8; CG11414; slik; zip; RpL19; E(bx); CG13900; Psf1; Klp61F; CG12…
GO:0045184	1.00345e-41	4.32712	120.13	245	367	establishment of protein localization	3.5472e-40	Rab35; TRAM; dor; Vps26; Pex5; deltaCOP; sgg; ttm50; CHOp24; rb; GAA1; CG32758; CG3160; Rab18; cm; Rab39; Tom40; p115; Crag; AP-1gamma; Gga; Tango5; Act57B; Tim10; Tango11; Vps35; Swim; Nup214; Golgin245; or; Rap2l; gammaSnap1; Nxt1; CG13887; Vti1; Klp61F; alphaCOP; mge; pav; Hsp60; CG1657; hop; Ran; Gtp-bp; Tim8; p24-1; Tango4; Tim9a; Tango13; Tango2; Nup93-1; g; opm; Gmap; exd; Stim; Ranbp16; C…
GO:0015031	1.16772e-41	4.45499	115.547	238	353	protein transport	4.02723e-40	Rab35; TRAM; dor; Vps26; Pex5; deltaCOP; sgg; ttm50; CHOp24; rb; GAA1; CG32758; CG3160; Rab18; cm; Rab39; Tom40; p115; Crag; AP-1gamma; Gga; Tango5; Act57B; Tim10; Tango11; Vps35; Nup214; Golgin245; or; Rap2l; gammaSnap1; Nxt1; CG13887; Vti1; Klp61F; alphaCOP; mge; pav; Hsp60; CG1657; hop; Ran; Gtp-bp; Tim8; p24-1; Tango4; Tim9a; Tango13; Tango2; Nup93-1; g; opm; Gmap; exd; Stim; Ranbp16; Chc; Nu…
GO:0009056	1.08239e-40	2.87473	226.185	392	691	catabolic process	3.64404e-39	CG9577; arg; SkpA; CG3699; dor; Edem1; pn; wds; Zw10; sgg; ctp; l(1)G0334; CG4165; CG3016; CG5966; Spat; Top3beta; Ubi-p5E; schlank; nonC; CG4586; Atg5; Upf2; Ppt1; Moe; Hex-A; Idgf4; Atg8a; Prosalpha3; Acox57D-p; Acox57D-d; Rae1; Vps20; Dcp-1; Sesn; Not11; Upf3; DCP1; Thiolase; Pym; Snap29; snama; Dat; cN-IIIB; CG3356; CG3376; Rpn8; slik; CG30421; key; CG32479; CG9149; CG9153; Cht2; SCOT; Atg2; …
GO:0007051	9.57735e-40	5.62497	84.4511	187	258	spindle organization	3.14939e-38	RpL22; sta; mip130; CG8636; sgg; RpL35; RpL7A; RpL17; RpS6; CG10932; Rbm13; Moe; CG7033; c12.1; Prosalpha3; RpS16; RpL23; RpL12; RpL39; Rpn8; slik; RpL19; fwd; CG13900; Klp61F; CG12018; RpL8; Non2; Hsp83; RpL28; pav; Dlic; Ran; Klp10A; RpS15Aa; Tcp-1zeta; U2af50; Rok; eIF-2alpha; Axs; SmG; RpS5a; Grip84; polo; Rpn1; RpL26; Rpn12; mop; Gl; endos; RpS4; Sap130; CG10754; eIF-2beta; RpL10Ab; nudE; Rp…
GO:0030154	2.15647e-39	1.84667	791.811	1068	2419	cell differentiation	6.93012e-38	alpha-Cat; CkIIalpha; CG18273; Appl; Roc1a; SkpA; sdk; CG5254; Rbf; CG13366; AMPKalpha; CG11448; DAAM; pck; rush; dor; mip130; Actn; usp; csw; crn; kz; Vinc; Nmd3; wds; Zw10; sgg; Rala; CG2875; lva; Femcoat; Fas2; CG3527; Cbp80; ctp; Ptp4E; snf; Sas10; Mcm3; XRCC1; spoon; Act5C; GAA1; sqh; wuho; Mcm6; Inx2; CG4593; cm; CG32732; Atg5; ct; bys; sn; mys; UbcE2H; Trxr-1; slpr; CG2260; Cp36; Nrg; CG12…
GO:1902589	3.74991e-39	2.16586	435.021	652	1329	single-organism organelle organization	1.17831e-37	alpha-Cat; CkIIalpha; SkpA; Sec22; RpL22; CG13366; CG11412; CG14786; DAAM; dor; sta; mip130; Ocrl; east; Actn; Pex5; crn; Vinc; wds; Zw10; CG8636; sgg; ttm50; Vap-33A; cib; CG2982; mei-9; ctp; Cdk7; spoon; RpL35; CG4078; sqh; Marf; RpL7A; RpL17; NELF-B; p115; sn; mys; RpS6; CG10932; Rbm13; Moe; CG7033; ric8a; c12.1; NA; Act57B; Prosalpha3; cpa; mRpL54; sktl; mago; tud; Sgf29; Tim10; Rae1; RpS16; …
GO:0016482	4.53782e-39	5.06727	92.6343	199	283	cytoplasmic transport	1.37623e-37	CG4293; Sec22; TRAM; rush; dor; sta; Ns3; Pex5; Nmd3; sgg; CHOp24; Torsin; GAA1; sqh; Tom40; Ykt6; Crag; CG16892; RpS28b; Act57B; mago; tud; CG10320; Tim10; Nup214; Golgin245; Dcp-1; thoc5; Nxt1; thoc7; Ccz1; pav; Syx17; sbr; Hsp60; hop; Ran; Gtp-bp; Tim8; Tomosyn; comt; Tim9a; Nup93-1; g; Gmap; exd; Stim; Ranbp16; U2af50; Nup153; fu; car; Tim9b; Nup205; alphaSnap; Kap-alpha1; Tom20; CG8004; l(3)…
GO:0006396	4.57444e-39	3.53813	149.262	283	456	RNA processing	1.37623e-37	elav; CG11418; sta; CG4045; CG3071; crn; CG2685; Nsun2; CG3527; Cbp80; snf; Rnp4F; CG4119; IntS6; wuho; CG3198; RpS6; c12.1; Bx42; CG7246; CG2972; CG9344; CG9346; mago; LSm1; CG4266; CG4038; CG4610; qkr58E-1; Fib; vir; Rrp4; IntS1; Nop60B; thoc7; CG7028; Cypl; Cdc5; CG13900; pUf68; CG2021; CG7879; ecd; CG32281; IntS10; sbr; l(1)10Bb; Tango4; REG; CG1622; Rbp1-like; Rtc1; l(1)G0007; CG1434; mRNA-c…
GO:0065008	9.84495e-39	2.33636	345.66	541	1056	regulation of biological quality	2.90016e-37	alpha-Cat; CkIIalpha; Roc1a; SkpA; Rbf; AMPKalpha; CG3719; DAAM; pck; Rbcn-3B; CG4199; Actn; usp; deltaCOP; Vinc; sgg; VhaAC39-1; Vap-33A; Fas2; rb; spoon; CG4078; Act5C; MAPk-Ak2; Rab18; sqh; Marf; Top3beta; Ctr1A; bou; cm; mys; sws; Trxr-1; slpr; Nrg; Moe; AP-1gamma; ric8a; Zpr1; NA; fh; Hex-A; Lst8; Act57B; cpa; shg; sktl; mago; Rbpn-5; Sara; Egfr; Rae1; CG10433; Fkbp14; Synj; blw; Cdk9; CG555…
GO:0006886	1.37976e-38	5.39498	85.4331	187	261	intracellular protein transport	3.98158e-37	TRAM; dor; Vps26; Pex5; sgg; CHOp24; rb; GAA1; CG32758; CG3160; cm; Tom40; p115; Crag; AP-1gamma; Gga; Act57B; Tim10; Nup214; Golgin245; or; gammaSnap1; Nxt1; CG13887; Vti1; alphaCOP; mge; pav; Hsp60; hop; Ran; Gtp-bp; Tim8; Tim9a; Nup93-1; g; Gmap; exd; Stim; Ranbp16; Chc; Nup153; betaCOP; fu; car; Ranbp21; Tim9b; AP-1-2beta; Nup205; Clc; alphaSnap; Kap-alpha1; Tom20; CG8004; CG32165; CG32164; A…
GO:0051234	1.65152e-38	1.98605	569.554	810	1740	establishment of localization	4.6705e-37	Rab35; CG4293; CG5254; Sec22; TRAM; AMPKalpha; CG12773; CG3638; pck; rush; inc; dor; sta; Ns3; Vps26; Ocrl; east; Pex5; deltaCOP; csw; Mct1; Vinc; Nmd3; Zw10; sgg; ttm50; CG2930; VhaAC39-1; Vap-33A; lva; CG3556; CHOp24; Cbp80; Torsin; rb; ctp; Act5C; GAA1; CG32758; CG3160; Rab18; sqh; CG3823; Marf; Ctr1A; nonC; Inx2; cm; ogre; Rab39; Tom40; p115; Ykt6; CG2258; CG10778; Crag; Ppt1; Moe; AP-1gamma;…
GO:0007017	2.7076e-38	3.15882	176.758	320	540	microtubule-based process	7.50697e-37	SkpA; RpL22; sta; mip130; crn; CG8636; sgg; Vap-33A; ctp; RpL35; Marf; RpL7A; RpL17; RpS6; CG10932; Rbm13; Moe; CG7033; ric8a; c12.1; fh; Act57B; Prosalpha3; cpa; sktl; mago; Rae1; RpS16; RpL23; CycB; Fib; l(2)06496; RpL12; RpL39; betaTub60D; Rpn8; slik; RpL19; fwd; Cdc5; CG13900; Sac1; Rac1; Klp61F; CG12018; alpha-Spec; RpL23A; RpL8; Non2; Hsp83; RpL28; Rcd5; pav; Dlic; Ran; Klp10A; dlg1; Hsc70-…
GO:0048869	3.8336e-38	1.81261	824.544	1100	2519	cellular developmental process	1.04245e-36	alpha-Cat; CkIIalpha; CG18273; Appl; Roc1a; SkpA; sdk; CG5254; Rbf; CG13366; AMPKalpha; CG11448; DAAM; pck; rush; dor; mip130; Actn; usp; csw; crn; kz; Vinc; Nmd3; wds; Zw10; sgg; Rala; CG2875; lva; Femcoat; Fas2; CG3527; Cbp80; ctp; Ptp4E; snf; Sas10; Mcm3; XRCC1; spoon; Act5C; GAA1; MAPk-Ak2; Rab18; sqh; wuho; Marf; Mcm6; Inx2; CG4593; cm; CG32732; Atg5; ct; bys; sn; mys; UbcE2H; Trxr-1; slpr; …
GO:0044260	6.29833e-38	1.69847	1191.15	1500	3639	cellular macromolecule metabolic process	1.65072e-36	CkIIalpha; cin; elav; CG3038; l(1)1Bi; Roc1a; SkpA; Rbf; RpL22; RpL36; CG11412; AMPKalpha; CG14786; CG11418; dor; sta; MED18; mRpL16; mip130; CG4045; usp; CG4406; eIF2B-epsilon; Edem1; Pgam5; CG14812; csw; Pgd; pn; CG3071; mRpL14; CG2918; crn; wds; Zw10; CG8636; tko; sgg; eIF2B-beta; ttm50; CG2685; CG10802; Rala; NA; tyf; GlcAT-I; CG2982; mRpL33; mei-9; Nsun2; CG3527; mRpL30; Cbp80; Torsin; rb; P…
GO:0051179	6.30401e-38	1.87753	696.885	955	2129	localization	1.65072e-36	Rab35; alpha-Cat; CkIIalpha; CG4293; Roc1a; CG5254; Sec22; TRAM; AMPKalpha; CG12773; CG3638; pck; rush; inc; dor; sta; Ns3; Vps26; Ocrl; east; Actn; usp; Pex5; deltaCOP; csw; Mct1; crn; Vinc; Nmd3; Zw10; sgg; ttm50; Rala; CG2930; VhaAC39-1; Vap-33A; lva; CG3556; CHOp24; Cbp80; Torsin; rb; ctp; spoon; Act5C; GAA1; CG32758; CG3160; Rab18; sqh; CG3823; Marf; Ctr1A; nonC; Inx2; cm; ogre; Rab39; Tom40…
GO:0006810	2.74388e-37	1.98406	548.277	781	1675	transport	7.05427e-36	Rab35; CG4293; CG5254; Sec22; TRAM; AMPKalpha; CG12773; CG3638; pck; rush; inc; dor; sta; Ns3; Vps26; Ocrl; Pex5; deltaCOP; csw; Mct1; Vinc; Nmd3; Zw10; sgg; ttm50; CG2930; VhaAC39-1; Vap-33A; CG3556; CHOp24; Cbp80; Torsin; rb; Act5C; GAA1; CG32758; CG3160; Rab18; sqh; CG3823; Marf; Ctr1A; nonC; Inx2; cm; ogre; Rab39; Tom40; p115; Ykt6; CG2258; CG10778; Crag; Ppt1; Moe; AP-1gamma; CG17754; CG1689…
GO:0033554	4.73333e-37	2.96385	191.815	338	586	cellular response to stress	1.19516e-35	CG9578; CkIIalpha; SkpA; Rbf; AMPKalpha; dor; Ns3; Edem1; CG3071; Nmd3; wds; sgg; eIF2B-beta; Rala; mei-9; CG3527; Mcm3; XRCC1; CG4078; MAPk-Ak2; Marf; schlank; Atg5; Tom40; Gclc; Trxr-1; slpr; l(1)G0020; Dsor1; CG7246; CG2972; flw; Atg8a; cpa; CG4038; CycB; Fib; Dcp-1; l(2)efl; DNA-ligI; eIF6; Snap29; Nxt1; Nop60B; CG4049; Letm1; Pdk1; E(bx); Sac1; Rac1; CG12018; CG8993; msn; Atg2; Jafrac2; CG17…
GO:0044248	6.09411e-37	3.01879	184.614	328	564	cellular catabolic process	1.51177e-35	CG9577; arg; SkpA; CG3699; dor; Edem1; pn; wds; Zw10; sgg; ctp; CG4165; CG3016; Spat; Top3beta; Ubi-p5E; nonC; CG4586; Atg5; Upf2; Moe; Atg8a; Prosalpha3; Acox57D-p; Acox57D-d; Rae1; Vps20; Dcp-1; Sesn; Not11; Upf3; DCP1; Thiolase; Pym; Snap29; snama; Dat; cN-IIIB; CG3356; CG3376; Rpn8; slik; CG30421; CG32479; CG9149; CG9153; SCOT; Atg2; Jafrac2; CG12082; ida; Ubi-p63E; Ccz1; Gad1; Syx17; v; sesB…
GO:0019752	1.70572e-36	4.13822	110.31	222	337	carboxylic acid metabolic process	4.15843e-35	CG9577; arg; CG17896; CG3699; CG10802; CG6428; l(1)G0334; spoon; CG3011; kdn; Spat; l(1)G0255; CG4586; Pdp; CG10932; CG2263; Hex-A; Aats-lys; Gip; Acox57D-p; Acox57D-d; CG30185; Thiolase; Aats-tyr-m; Trh; CG9149; mtacp1; Aats-pro; CG32281; Scsalpha; Gad1; Faa; Rpd3; Aats-leu; v; CG2543; CG1673; CG11134; CG5599; pdgy; HDAC6; CG7860; CG8097; Gapdh2; Aats-arg; Mfe2; CG9914; scu; Aats-his; CG6891; Pf…
GO:0006082	2.35874e-36	3.9801	115.875	230	354	organic acid metabolic process	5.55877e-35	CG9577; arg; CG17896; CG3699; CG10802; CG6428; GlcAT-I; l(1)G0334; spoon; CG3011; kdn; Spat; l(1)G0255; CG4586; Pdp; CG10932; CG2263; Hex-A; Aats-lys; Gip; Acox57D-p; Acox57D-d; CG30185; Thiolase; Aats-tyr-m; Trh; CG9149; mtacp1; oxt; Aats-pro; CG32281; Scsalpha; Gad1; Faa; Rpd3; Aats-leu; v; CG2543; CG1673; CG11134; CG5599; pdgy; HDAC6; CG7860; CG8097; Gapdh2; Aats-arg; Mfe2; CG9914; scu; Aats-h…
GO:0043436	2.35874e-36	3.9801	115.875	230	354	oxoacid metabolic process	5.55877e-35	CG9577; arg; CG17896; CG3699; CG10802; CG6428; GlcAT-I; l(1)G0334; spoon; CG3011; kdn; Spat; l(1)G0255; CG4586; Pdp; CG10932; CG2263; Hex-A; Aats-lys; Gip; Acox57D-p; Acox57D-d; CG30185; Thiolase; Aats-tyr-m; Trh; CG9149; mtacp1; oxt; Aats-pro; CG32281; Scsalpha; Gad1; Faa; Rpd3; Aats-leu; v; CG2543; CG1673; CG11134; CG5599; pdgy; HDAC6; CG7860; CG8097; Gapdh2; Aats-arg; Mfe2; CG9914; scu; Aats-h…
GO:1901360	3.26997e-36	1.82824	734.201	991	2243	organic cyclic compound metabolic process	7.57991e-35	CG32230; CkIIalpha; cin; elav; CG17896; l(1)1Bi; SkpA; Rbf; CG14786; CG11418; dor; sta; MED18; mip130; CG4045; usp; csw; Pgd; CG3621; pn; CG3071; crn; sgg; CG2685; CG10802; CG2982; mei-9; Nsun2; CG3527; Cbp80; Torsin; rb; l(1)G0334; snf; Rnp4F; Cdk7; Mcm3; XRCC1; CG4119; CG4078; IntS6; Spt6; wuho; Marf; CG3446; Top3beta; schlank; Mcm6; nonC; CG3192; CG3198; cm; ct; NELF-B; Upf2; fs(1)h; RpS6; CG1…
GO:0006807	1.00755e-35	1.7061	1034.03	1321	3159	nitrogen compound metabolic process	2.29787e-34	CG32230; CkIIalpha; cin; arg; elav; CG17896; l(1)1Bi; SkpA; Rbf; RpL22; RpL36; CG14786; CG11418; dor; sta; MED18; mRpL16; mip130; CG4045; usp; eIF2B-epsilon; csw; Pgd; CG3621; pn; CG3071; mRpL14; crn; CG8636; tko; sgg; eIF2B-beta; CG2685; CG10802; CG6428; tyf; GlcAT-I; CG2982; mRpL33; mei-9; Nsun2; CG3527; mRpL30; Cbp80; Torsin; l(1)G0334; snf; Rnp4F; Cdk7; Mcm3; XRCC1; CG4119; RpL35; CG4078; CG3…
GO:0006725	1.06528e-35	1.83349	710.306	962	2170	cellular aromatic compound metabolic process	2.39096e-34	CG32230; CkIIalpha; elav; CG17896; l(1)1Bi; SkpA; Rbf; CG14786; CG11418; dor; sta; MED18; mip130; CG4045; usp; csw; Pgd; CG3621; pn; CG3071; crn; sgg; CG2685; CG10802; CG2982; mei-9; Nsun2; CG3527; Cbp80; Torsin; rb; l(1)G0334; snf; Rnp4F; Cdk7; Mcm3; XRCC1; CG4119; CG4078; IntS6; Spt6; wuho; CG3446; Top3beta; schlank; Mcm6; nonC; CG3192; CG3198; cm; ct; NELF-B; Upf2; fs(1)h; RpS6; CG18624; ND75;…
GO:0007052	1.49562e-35	5.83501	72.3399	162	221	mitotic spindle organization	3.30439e-34	RpL22; sta; mip130; CG8636; RpL35; RpL7A; RpL17; RpS6; CG10932; Rbm13; Moe; CG7033; c12.1; Prosalpha3; RpS16; RpL23; RpL12; RpL39; Rpn8; slik; RpL19; CG13900; Klp61F; CG12018; RpL8; Non2; Hsp83; RpL28; pav; Dlic; Klp10A; RpS15Aa; Tcp-1zeta; U2af50; Rok; eIF-2alpha; SmG; RpS5a; Grip84; polo; Rpn1; RpL26; Rpn12; Gl; endos; RpS4; Sap130; CG10754; eIF-2beta; RpL10Ab; nudE; RpS9; eIF-4E; Klp67A; RpL14…
GO:0006325	5.43354e-35	3.56844	130.605	249	399	chromatin organization	1.182e-33	CG11412; wds; CG2982; Act5C; HP1b; dalao; NA; Sgf29; HmgD; Lpt; Nap1; Ssrp; Nurf-38; E(bx); CG2469; dre4; Rpd3; Usp7; Chrac-16; Bap60; Set2; Top1; HDAC6; Nup153; e(y)1; Arp8; Prp3; Mi-2; asf1; rept; Chd3; brm; AGO2; Trl; ptip; JIL-1; eIF-4E; msl-3; Ubp64E; Bre1; Elp3; Taf10b; Rab5; ebi; Rbbp5; pzg; Chro; CG2051; Snr1; Hcs; Hdac3; atms; Lam; Hel25E; lid; Gas41; Mnn1; r2d2; LKR; Su(var)205; Wdr82; …
GO:0044267	1.00075e-34	1.8159	713.579	962	2180	cellular protein metabolic process	2.14404e-33	CkIIalpha; cin; CG3038; Roc1a; SkpA; RpL22; RpL36; CG11412; AMPKalpha; CG14786; dor; sta; mRpL16; CG4406; eIF2B-epsilon; Edem1; Pgam5; CG14812; csw; Pgd; mRpL14; CG2918; wds; Zw10; CG8636; tko; sgg; eIF2B-beta; ttm50; CG10802; Rala; NA; tyf; CG2982; mRpL33; mRpL30; Torsin; rb; Ptp4E; Cdk7; CG4165; RhoGAP5A; RpL35; CG3016; GAA1; MAPk-Ak2; CG5941; CG3781; RpL7A; PpV; Ubi-p5E; nonC; RpL17; CG3198; c…
GO:0071702	1.41072e-34	2.90542	184.614	323	564	organic substance transport	2.97724e-33	Rab35; TRAM; CG12773; dor; sta; Vps26; Pex5; deltaCOP; sgg; ttm50; CG2930; CG3556; CHOp24; Cbp80; rb; GAA1; CG32758; CG3160; Rab18; cm; Rab39; Tom40; p115; Crag; AP-1gamma; RpS28b; Gga; Tango5; Act57B; mago; tud; CG30392; CG10320; Tim10; Tango11; Vps35; Nup214; Golgin245; thoc5; or; Rap2l; gammaSnap1; Nxt1; CG3608; thoc7; CG13887; Vti1; Klp61F; ABCB7; alphaCOP; mge; pav; sbr; sesB; Hsp60; Dlic; C…
GO:1902580	5.89548e-34	3.34283	140.424	261	429	single-organism cellular localization	1.22591e-32	TRAM; dor; Ns3; Ocrl; Pex5; Nmd3; sgg; Vap-33A; rb; ctp; GAA1; nonC; cm; Tom40; Crag; Ppt1; Moe; AP-1gamma; ric8a; flw; Act57B; sktl; mago; Tim10; Synj; CycB; Nup214; Golgin245; or; gammaSnap1; DCP1; slik; Eps-15; nSyb; Hsp83; pav; Rop; Syx17; sesB; Hsp60; hop; Ran; Klp10A; Gtp-bp; Tim8; dlg1; Tomosyn; comt; Tim9a; Nup93-1; Lsd-2; Gmap; shi; exd; Stim; Chc; Nup153; X11L; fu; car; Cdc42; Tim9b; AP…
GO:0006793	6.82766e-34	2.27844	316.201	491	966	phosphorus metabolic process	1.39917e-32	CG32230; CkIIalpha; cin; SkpA; AMPKalpha; CG14786; Ocrl; CG4406; Pgam5; csw; Pgd; CG3621; pn; sgg; ttm50; Rala; Vap-33A; l(1)G0334; Ptp4E; Cdk7; RhoGAP5A; GAA1; MAPk-Ak2; CG3160; Mipp2; PpV; CG3446; nonC; CG3192; CG3198; Pdp; sws; CG18624; CG11190; ND75; slpr; e(r); Dsor1; Hex-A; l(1)G0232; l(1)G0230; flw; PPP4R2r; ras; cpa; CG30291; sktl; mago; CG4302; Egfr; CG10320; Ppcdc; Synj; blw; Cdk9; CG35…
GO:0050789	7.78726e-34	1.66984	1079.53	1362	3298	regulation of biological process	1.57303e-32	Rab35; CkIIalpha; elav; Appl; Roc1a; SkpA; sdk; Rbf; RpL22; AMPKalpha; CG14786; CG3719; DAAM; inc; dor; Ns3; MED18; mip130; Rbcn-3B; Ocrl; east; CG4199; usp; Edem1; Pgam5; deltaCOP; CG14812; csw; Pgd; pn; CG3071; crn; msta; wds; Zw10; CG8636; sgg; eIF2B-beta; CG32795; Rala; VhaAC39-1; lva; tyf; CG2982; mei-9; Fas2; CHOp24; CG3527; Cbp80; Torsin; rb; snf; Cdk7; Mcm3; RhoGAP5A; spoon; CG4119; CG407…
GO:0034641	8.36377e-34	1.70521	945.328	1216	2888	cellular nitrogen compound metabolic process	1.66569e-32	CG32230; CkIIalpha; elav; CG17896; l(1)1Bi; SkpA; Rbf; RpL22; RpL36; CG14786; CG11418; dor; sta; MED18; mRpL16; mip130; CG4045; usp; eIF2B-epsilon; csw; Pgd; CG3621; pn; CG3071; mRpL14; crn; CG8636; tko; sgg; eIF2B-beta; CG2685; CG10802; tyf; CG2982; mRpL33; mei-9; Nsun2; CG3527; mRpL30; Cbp80; Torsin; l(1)G0334; snf; Rnp4F; Cdk7; Mcm3; XRCC1; CG4119; RpL35; CG4078; IntS6; CG5941; Spt6; wuho; RpL…
GO:0006897	2.47966e-33	3.77191	113.911	222	348	endocytosis	4.86978e-32	Rab35; Sec22; TRAM; AMPKalpha; CG3638; rush; dor; Ocrl; deltaCOP; csw; Vinc; rb; Act5C; cm; CG2258; CG10778; Ppt1; Moe; AP-1gamma; CG17754; l(1)G0232; ras; cpa; Synj; Vps35; blw; Lpt; or; Chi; Snap29; Eps-15; Rac1; Cct1; alphaCOP; Pxn; kst; Ubi-p63E; prtp; CkIalpha; comt; g; CG5599; shi; vap; Chc; CG9132; par-6; betaCOP; car; Cdc42; Tao; AP-1-2beta; gig; Clc; polo; alphaSnap; CG7365; HLH106; fz2;…
GO:1902578	1.06474e-32	1.91001	533.547	748	1630	single-organism localization	2.06239e-31	Rab35; alpha-Cat; CG4293; CG5254; Sec22; TRAM; AMPKalpha; CG12773; CG3638; pck; rush; inc; dor; sta; Ns3; Vps26; Ocrl; Actn; Pex5; deltaCOP; csw; Mct1; Vinc; Nmd3; Zw10; sgg; CG2930; VhaAC39-1; Vap-33A; CG3556; CHOp24; Torsin; rb; ctp; Act5C; GAA1; CG32758; CG3160; sqh; Marf; Ctr1A; nonC; cm; Tom40; p115; Ykt6; CG10778; Crag; Ppt1; Moe; AP-1gamma; CG17754; ric8a; fh; RpS28b; Gga; l(1)G0232; l(1)G…
GO:0051276	1.29851e-32	2.7669	190.833	327	583	chromosome organization	2.4812e-31	SkpA; CG11412; wds; Zw10; sgg; CG2982; spoon; CG4078; Act5C; Top3beta; Moe; HP1b; dalao; NA; Sgf29; HmgD; CycB; Lpt; Nap1; Ssrp; Nurf-38; slik; E(bx); CG2469; dre4; ida; RfC4; Rpd3; Src64B; Klp10A; Usp7; Chrac-16; Bap60; Set2; Top1; HDAC6; Nup153; SMC3; e(y)1; Arp8; Prp3; Mi-2; asf1; rept; Chd3; brm; AGO2; Trl; RecQ5; Gl; ptip; vih; JIL-1; nudE; eIF-4E; Klp67A; msl-3; Rcc1; Ubp64E; mad2; Bre1; ms…
GO:1901575	3.07729e-32	2.79904	183.959	317	562	organic substance catabolic process	5.80171e-31	CG9577; arg; SkpA; CG3699; Edem1; pn; wds; Zw10; sgg; l(1)G0334; CG4165; CG3016; CG5966; Spat; Top3beta; Ubi-p5E; schlank; nonC; CG4586; Upf2; Ppt1; Moe; Hex-A; Idgf4; Prosalpha3; Acox57D-p; Acox57D-d; Vps20; Not11; Upf3; DCP1; Thiolase; Pym; snama; Dat; cN-IIIB; CG3356; CG3376; Rpn8; slik; CG30421; key; CG32479; CG9149; CG9153; Cht2; SCOT; CG12082; Cht7; ida; Gad1; v; Rpt3; CG2247; Upf1; Usp7; C…
GO:0055114	4.54215e-32	2.80571	181.995	314	556	oxidation-reduction process	8.45079e-31	CG9577; CG32230; CG17896; Cyp4g1; CG14630; CG3699; CG4199; CG3835; Pgd; CG3621; Cyp4d14; CG3626; l(1)G0334; spoon; kdn; CG3446; l(1)G0255; COQ7; CG3192; CG4586; CG18624; Trxr-1; ND75; Sptr; su(r); fh; ras; Acox57D-p; Acox57D-d; CG10320; T3dh; blw; Cyp6d2; levy; Phm; CG3803; Thiolase; NDUFA8; Trh; CG9149; mtacp1; Pxn; Jafrac2; PHGPx; NDUFS3; Scsalpha; CG10863; Ero1L; CG14997; Rpd3; Cyp4g15; Cyp28c…
GO:0006796	6.22852e-32	2.23079	312.6	481	955	phosphate-containing compound metabolic process	1.14378e-30	CG32230; CkIIalpha; cin; SkpA; AMPKalpha; CG14786; Ocrl; CG4406; Pgam5; csw; Pgd; CG3621; pn; sgg; ttm50; Rala; Vap-33A; l(1)G0334; Ptp4E; Cdk7; RhoGAP5A; GAA1; MAPk-Ak2; CG3160; Mipp2; PpV; CG3446; nonC; CG3192; CG3198; Pdp; sws; CG18624; CG11190; ND75; slpr; e(r); Dsor1; Hex-A; l(1)G0232; l(1)G0230; flw; PPP4R2r; ras; cpa; CG30291; sktl; mago; CG4302; Egfr; CG10320; Ppcdc; Synj; blw; Cdk9; CG35…
GO:0046483	1.15194e-31	1.77379	698.522	933	2134	heterocycle metabolic process	2.08826e-30	CG32230; CkIIalpha; cin; elav; CG17896; l(1)1Bi; SkpA; Rbf; CG14786; CG11418; dor; sta; MED18; mip130; CG4045; usp; csw; Pgd; CG3621; pn; CG3071; crn; sgg; CG2685; CG10802; CG2982; mei-9; Nsun2; CG3527; Cbp80; rb; l(1)G0334; snf; Rnp4F; Cdk7; Mcm3; XRCC1; CG4119; CG4078; IntS6; Spt6; wuho; CG3446; Top3beta; schlank; Mcm6; nonC; CG3192; CG3198; cm; ct; NELF-B; Upf2; fs(1)h; RpS6; CG18624; ND75; CG…
GO:0051128	2.76404e-31	2.55788	216.038	357	660	regulation of cellular component organization	4.94727e-30	SkpA; AMPKalpha; CG14786; DAAM; dor; Ocrl; Pgam5; pn; Zw10; sgg; Rala; lva; Fas2; spoon; GAA1; MAPk-Ak2; Rab18; sqh; Marf; Top3beta; mys; slpr; Crag; Ppt1; Moe; HP1b; NA; Act57B; cpa; mago; NC2alpha; Rae1; GM130; babos; Cdk9; Sesn; gbb; Lpt; eIF-5A; tsr; HSPC300; DCP1; Snap29; Ssrp; gek; slik; zip; Eps-15; Pdk1; fwd; CG7028; trio; pUf68; Rac1; Klp61F; alpha-Spec; dre4; R; msn; Hsp83; CG12082; ida…
GO:1901564	1.61673e-30	1.90708	491.322	691	1501	organonitrogen compound metabolic process	2.85757e-29	CG32230; cin; arg; CG17896; RpL22; RpL36; CG14786; dor; sta; mRpL16; eIF2B-epsilon; Pgd; CG3621; pn; mRpL14; CG8636; tko; eIF2B-beta; CG10802; CG6428; tyf; GlcAT-I; mRpL33; mRpL30; Torsin; l(1)G0334; RpL35; CG3011; CG5941; Spt6; RpL7A; CG3446; schlank; RpL17; CG3192; NA; Gclc; sws; RpS6; CG18624; ND75; CG2263; CG12065; Sptr; e(r); CG1885; t; su(r); RpS28b; Hex-A; Aats-lys; Idgf4; l(1)G0230; ras; …
GO:0007275	2.10419e-30	1.63219	1041.24	1305	3181	multicellular organismal development	3.67323e-29	CkIIalpha; cin; elav; CG18273; Appl; Roc1a; SkpA; sdk; CG13366; AMPKalpha; CG11448; DAAM; CG3638; pck; rush; dor; usp; Edem1; deltaCOP; csw; pn; crn; kz; Vinc; Nmd3; wds; Zw10; sgg; Rala; CG2875; Vap-33A; lva; cib; Fas2; CHOp24; CG3527; Cbp80; Torsin; rb; ctp; Ptp4E; snf; Sas10; Rnp4F; Mcm3; RhoGAP5A; spoon; Act5C; GAA1; CG5966; sqh; Marf; Top3beta; CG3226; bou; Inx2; CG4593; cm; ogre; ct; bys; s…
GO:0000022	2.99123e-30	26.5065	26.841	76	82	mitotic spindle elongation	5.15805e-29	RpL22; sta; CG8636; RpL35; RpL7A; RpL17; RpS6; Rbm13; Prosalpha3; RpS16; RpL23; RpL12; RpL39; Rpn8; RpL19; RpL8; RpL28; pav; RpS15Aa; Rok; eIF-2alpha; RpS5a; Rpn1; RpL26; Rpn12; Gl; RpS4; eIF-2beta; RpL10Ab; RpS9; eIF-4E; RpL14; RpL18; RpL27A; Prosbeta7; eIF3-S10; RpL37A; eIF-4a; RpL36A; Pvr; RpS13; RpL13; RpL7; RpL9; Nnp-1; RpL24; RpL30; Pomp; RpL3; Prosalpha2; Pp1-87B; eIF-1A; RpS30; Rpt2; RpL2…
GO:0051231	8.51581e-30	23.0218	27.4957	77	84	spindle elongation	1.45077e-28	RpL22; sta; CG8636; RpL35; RpL7A; RpL17; RpS6; Rbm13; Prosalpha3; RpS16; RpL23; RpL12; RpL39; Rpn8; RpL19; RpL8; RpL28; pav; RpS15Aa; Rok; eIF-2alpha; RpS5a; Rpn1; RpL26; Rpn12; Gl; RpS4; eIF-2beta; RpL10Ab; RpS9; eIF-4E; Klp67A; RpL14; RpL18; RpL27A; Prosbeta7; eIF3-S10; RpL37A; eIF-4a; RpL36A; Pvr; RpS13; RpL13; RpL7; RpL9; Nnp-1; RpL24; RpL30; Pomp; RpL3; Prosalpha2; Pp1-87B; eIF-1A; RpS30; Rp…
GO:0016071	1.918e-29	3.36451	118.821	222	363	mRNA metabolic process	3.22862e-28	elav; CG11418; crn; CG2685; Cbp80; snf; CG4119; nonC; CG3198; Upf2; c12.1; Bx42; CG9344; mago; LSm1; CG4266; qkr58E-1; vir; Rrp4; Not11; Upf3; DCP1; Pym; thoc7; CG7028; Cypl; Cdc5; CG13900; pUf68; CG2021; CG7879; ecd; sbr; l(1)10Bb; Upf1; Tango4; REG; CG1622; Rbp1-like; l(1)G0007; mRNA-cap; CG5877; CG6227; caz; nonA; U2af50; Rrp45; SmG; CG7288; Rcd-1; pcm; Prp3; asf1; CG6841; CG7564; Pep; U4-U6-6…
GO:0032502	5.80109e-29	1.57075	1279.53	1552	3909	developmental process	9.65028e-28	alpha-Cat; CkIIalpha; cin; elav; CG18273; Appl; Roc1a; SkpA; sdk; CG5254; Rbf; RpL22; CG13366; AMPKalpha; CG11448; DAAM; CG3638; pck; rush; dor; Ns3; mip130; east; Actn; usp; Edem1; Pgam5; deltaCOP; csw; pn; crn; kz; Vinc; Nmd3; wds; Zw10; sgg; Rala; CG2875; Vap-33A; lva; cib; Femcoat; Fas2; CHOp24; CG3527; Cbp80; Torsin; rb; ctp; Ptp4E; snf; Sas10; Rnp4F; Mcm3; XRCC1; RhoGAP5A; spoon; Act5C; GAA…
GO:0044765	6.64437e-29	1.8765	487.721	681	1490	single-organism transport	1.09246e-27	Rab35; CG4293; CG5254; Sec22; TRAM; AMPKalpha; CG12773; CG3638; pck; rush; inc; dor; sta; Ns3; Vps26; Pex5; deltaCOP; csw; Mct1; Vinc; Nmd3; Zw10; sgg; CG2930; VhaAC39-1; Vap-33A; CG3556; CHOp24; Torsin; rb; Act5C; GAA1; CG32758; CG3160; sqh; Marf; Ctr1A; nonC; cm; Tom40; p115; Ykt6; CG10778; Crag; Ppt1; AP-1gamma; CG17754; fh; RpS28b; Gga; l(1)G0232; l(1)G0230; flw; ras; Tango5; Act57B; cpa; mag…
GO:0043170	8.01428e-29	1.55476	1402.28	1680	4284	macromolecule metabolic process	1.30255e-27	CkIIalpha; cin; elav; CG3038; l(1)1Bi; Roc1a; SkpA; Rbf; RpL22; RpL36; CG11412; AMPKalpha; CG14786; CG11418; dor; sta; MED18; mRpL16; mip130; east; CG4045; usp; CG4406; eIF2B-epsilon; Edem1; Pgam5; CG14812; csw; Pgd; pn; CG3071; mRpL14; CG2918; crn; msta; wds; Zw10; CG8636; tko; sgg; eIF2B-beta; ttm50; CG2685; CG2658; CG10802; Rala; NA; tyf; GlcAT-I; CG2982; mRpL33; mei-9; Nsun2; CG3527; mRpL30; …
GO:0044767	1.14757e-28	1.56873	1265.78	1536	3867	single-organism developmental process	1.84393e-27	alpha-Cat; CkIIalpha; cin; elav; CG18273; Appl; Roc1a; SkpA; sdk; CG5254; Rbf; RpL22; CG13366; AMPKalpha; CG11448; DAAM; CG3638; pck; rush; dor; Ns3; mip130; east; Actn; usp; Edem1; deltaCOP; csw; pn; crn; kz; Vinc; Nmd3; wds; Zw10; sgg; Rala; CG2875; Vap-33A; lva; cib; Femcoat; Fas2; CHOp24; CG3527; Cbp80; Torsin; rb; ctp; Ptp4E; snf; Sas10; Rnp4F; Mcm3; XRCC1; RhoGAP5A; spoon; Act5C; GAA1; MAPk…
GO:0006139	2.04384e-27	1.71639	668.735	882	2043	nucleobase-containing compound metabolic process	3.24718e-26	CG32230; CkIIalpha; elav; CG17896; l(1)1Bi; SkpA; Rbf; CG14786; CG11418; sta; MED18; mip130; CG4045; usp; csw; Pgd; CG3621; pn; CG3071; crn; sgg; CG2685; CG10802; CG2982; mei-9; Nsun2; CG3527; Cbp80; l(1)G0334; snf; Rnp4F; Cdk7; Mcm3; XRCC1; CG4119; CG4078; IntS6; Spt6; wuho; CG3446; Top3beta; schlank; Mcm6; nonC; CG3192; CG3198; ct; NELF-B; Upf2; fs(1)h; RpS6; CG18624; ND75; CG2263; CG12065; e(r…
GO:0019637	2.13388e-27	2.97557	136.169	242	416	organophosphate metabolic process	3.35256e-26	CG32230; cin; CG14786; Ocrl; CG4406; Pgd; CG3621; pn; Vap-33A; l(1)G0334; GAA1; CG3160; CG3446; CG3192; sws; CG18624; CG11190; ND75; e(r); Hex-A; l(1)G0230; ras; sktl; CG4302; CG10320; Ppcdc; Synj; blw; CG13551; levy; Tal; Galphas; cN-IIIB; CG3376; NDUFA8; fwd; Gyk; Sac1; mtacp1; Cct1; CG12016; CG12006; CG17333; sesB; CG1749; FucT6; CG32649; ade5; CG42237; CG15743; rdgB; CG9940; nmdyn-D6; CG14411…
GO:0007049	2.04877e-26	2.05128	320.456	474	979	cell cycle	3.18347e-25	CG9578; Rab35; CkIIalpha; SkpA; Rbf; RpL22; AMPKalpha; sta; mip130; Ocrl; east; csw; crn; wds; Zw10; CG8636; sgg; ttm50; mei-9; ctp; Cdk7; Mcm3; RpL35; Act5C; sqh; RpL7A; PpV; Mcm6; RpL17; ct; NELF-B; p115; RpS6; CG10932; Rbm13; e(r); Moe; CG7033; Dsor1; ric8a; c12.1; NA; flw; PPP4R2r; Act57B; Prosalpha3; CG30291; Egfr; Rae1; RpS16; RpL23; CycB; Cdk9; CG3530; pita; thoc5; RpL12; RpL39; gammaSnap1…
GO:0022613	3.14539e-26	7.69797	41.2435	99	126	ribonucleoprotein complex biogenesis	4.83432e-25	sta; Ns3; CG3071; Nmd3; CG2875; CG3527; RpL7A; CG3198; RpS6; RpS28b; CG2972; LSm1; CG4038; Fib; DCP1; eIF6; Nop60B; pUf68; CG11583; Rbp1-like; Rtc1; CG8939; U2af50; eIF-2alpha; pcm; CG7564; Smn; AGO2; CG12301; Prp31; NHP2; eIF-2beta; RpS17; CG8549; CG32409; mxt; RpS21; Rrp40; dbe; mRpL10; mTerf3; CG7338; RpLP0; Ddx1; Rheb; x16; nop5; r2d2; CG13097; hoip; CG4364; Srp54; me31B; CG6724; Ge-1; CG6712…
GO:0044711	6.29747e-26	2.51015	182.323	300	557	single-organism biosynthetic process	9.57486e-25	SkpA; Rbf; CG14786; dor; mip130; usp; CG4406; GlcAT-I; rb; Mcm3; CG3011; GAA1; Marf; schlank; Mcm6; COQ7; cm; CG10932; CG11190; e(r); su(r); fh; l(1)G0230; ras; mRpL54; Ppcdc; blw; yellow-d; pita; Galphas; Alas; or; CG3803; Aats-tyr-m; fwd; mtacp1; Cct1; mRpL46; ecd; oxt; pgant6; CG12016; CG12006; Hexo1; Gad1; v; sesB; Cyp4g15; CG2543; mRpL49; ade5; CG2453; CG15743; CG1673; CG11134; g; CG9940; nm…
GO:0061024	9.42981e-26	4.44252	69.0666	143	211	membrane organization	1.41848e-24	Sec22; TRAM; dor; csw; Zw10; ttm50; rb; GAA1; Marf; cm; p115; sws; Crag; AP-1gamma; Tim10; Nup214; or; Snap29; Vti1; alpha-Spec; nSyb; scramb2; kst; Syx17; Gtp-bp; comt; Nup93-1; shi; Chc; CG4301; X11L; beta-Spec; car; Cdc42; AP-1-2beta; Clc; alphaSnap; NA; nes; CG7603; Arl1; Syx13; CG32082; CG6404; scramb1; SH3PX1; Srp68; CG4942; SrpRbeta; Arp3; Srp9; Sec63; Srp19; Membrin; Srp54k; Dd; Sec5; Drp…
GO:0048518	1.74328e-25	1.92936	376.429	538	1150	positive regulation of biological process	2.59473e-24	CkIIalpha; SkpA; RpL22; DAAM; Ns3; usp; Pgam5; CG14812; Pgd; pn; CG3071; wds; sgg; CG32795; lva; tyf; CHOp24; CG3527; Torsin; rb; RhoGAP5A; CG5941; Spt6; Marf; Top3beta; schlank; CG3198; NELF-B; fs(1)h; slpr; Crag; Ppt1; Rbm13; e(r); Moe; HP1b; dalao; Dsor1; fh; CG7246; Act57B; mago; Egfr; NC2alpha; Swim; GM130; Dcp-1; gbb; Lpt; Galphas; eIF-5A; Chi; HSPC300; DCP1; CG3608; Nurf-38; slik; zip; key…
GO:0022402	1.96031e-25	2.13068	272.993	413	834	cell cycle process	2.88737e-24	CG9578; Rab35; CkIIalpha; SkpA; Rbf; RpL22; sta; mip130; Ocrl; east; crn; wds; Zw10; CG8636; sgg; ttm50; mei-9; ctp; Cdk7; Mcm3; RpL35; Act5C; sqh; RpL7A; PpV; Mcm6; RpL17; NELF-B; RpS6; CG10932; Rbm13; Moe; CG7033; Dsor1; ric8a; c12.1; NA; flw; Act57B; Prosalpha3; Egfr; Rae1; RpS16; RpL23; CycB; pita; thoc5; RpL12; RpL39; tsr; Rpn8; CG11414; slik; zip; RpL19; fwd; E(bx); Cdc5; CG13900; Psf1; Klp…
GO:0044712	2.39186e-25	3.40501	98.8536	186	302	single-organism catabolic process	3.48669e-24	CG9577; arg; CG3699; dor; Edem1; pn; Zw10; sgg; l(1)G0334; CG5966; Spat; schlank; CG4586; Atg5; Moe; Hex-A; Atg8a; Acox57D-p; Acox57D-d; Dcp-1; Sesn; Thiolase; Snap29; Dat; cN-IIIB; CG3376; slik; CG9149; SCOT; Atg2; Jafrac2; ida; Gad1; Syx17; v; CG42237; Jafrac1; Lsd-2; pdgy; CG7860; Gapdh2; Mfe2; sl; CG5162; Atg101; Pfrx; car; HLH106; NA; CG7430; Adgf-A; Pgm; CG17029; CG17027; CG6878; CG8745; CG…
GO:0048856	2.12617e-24	1.52666	1155.47	1397	3530	anatomical structure development	3.06776e-23	alpha-Cat; CkIIalpha; cin; elav; CG18273; Appl; Roc1a; SkpA; sdk; CG5254; Rbf; CG13366; AMPKalpha; CG11448; DAAM; CG3638; pck; rush; dor; mip130; east; Actn; usp; Pgam5; deltaCOP; csw; pn; crn; kz; Vinc; Nmd3; wds; Zw10; sgg; Rala; CG2875; Vap-33A; lva; cib; Femcoat; Fas2; CHOp24; CG3527; Cbp80; Torsin; ctp; Ptp4E; snf; Sas10; Rnp4F; Mcm3; RhoGAP5A; spoon; Act5C; GAA1; MAPk-Ak2; Rab18; CG5966; sq…
GO:0019538	2.44967e-24	1.58728	866.114	1086	2646	protein metabolic process	3.49882e-23	CkIIalpha; cin; CG3038; Roc1a; SkpA; RpL22; RpL36; CG11412; AMPKalpha; CG14786; dor; sta; mRpL16; CG4406; eIF2B-epsilon; Edem1; Pgam5; CG14812; csw; Pgd; mRpL14; CG2918; wds; Zw10; CG8636; tko; sgg; eIF2B-beta; ttm50; CG2658; CG10802; Rala; NA; tyf; GlcAT-I; CG2982; mRpL33; mRpL30; Torsin; rb; Ptp4E; Cdk7; CG4165; RhoGAP5A; RpL35; CG3016; GAA1; CG3108; CG3097; MAPk-Ak2; CG5941; CG3781; RpL7A; PpV…
GO:0016197	4.95942e-24	13.4819	26.841	71	82	endosomal transport	7.01261e-23	rush; dor; Vps26; CG32758; Vps35; Vps20; CG7967; kst; Ccz1; g; CG7192; car; Chmp1; Vps60; TSG101; Arl1; MICAL-like; RhoGAP68F; CG7197; CG10103; Mon1; CG3338; Snx1; Sec5; Rab5; Vps29; CG5498; CG4074; Arf79F; Vps37B; Ubc6; mtm; Rbsn-5; Snx6; scat; Stam; l(2)gd1; Vha68-2; Tor; Rab14; hk; ik2; godzilla; Arl2; VhaM8.9; Vps16A; Vps45; AP-1mu; Sbf; Past1; gish; Sec15; lsn; Rab7; Vps33B; Vps2; Exo84; Klp…
GO:0006397	5.73247e-24	3.15299	105.728	193	323	mRNA processing	8.02545e-23	elav; CG11418; crn; CG2685; Cbp80; snf; CG4119; CG3198; c12.1; Bx42; CG9344; mago; LSm1; CG4266; qkr58E-1; vir; Rrp4; thoc7; CG7028; Cypl; Cdc5; CG13900; pUf68; CG2021; CG7879; ecd; sbr; l(1)10Bb; Tango4; REG; CG1622; Rbp1-like; l(1)G0007; mRNA-cap; CG5877; CG6227; caz; nonA; U2af50; Rrp45; SmG; CG7288; Prp3; asf1; CG6841; CG7564; Pep; U4-U6-60K; Smn; Zn72D; IntS9; l(3)72Ab; Prp31; Tdrd3; SRm160;…
GO:0006520	6.41169e-24	5.12775	54.0094	117	165	cellular amino acid metabolic process	8.88836e-23	arg; CG17896; CG10802; CG6428; CG3011; CG2263; Aats-lys; CG30185; Aats-tyr-m; Trh; Aats-pro; CG32281; Gad1; Faa; Aats-leu; v; CG2543; CG1673; CG11134; CG7860; CG8097; Aats-arg; Aats-his; CG7433; Oat; CG7430; CG7441; CG9674; Aats-tyr; CG4573; l(3)72Dr; Eip71CD; Aats-gly; mRpL39; CG8745; CG10361; aay; CG5660; CG6638; CG8005; Hn; ple; CG4603; Aats-ala-m; Cbs; CG33123; CG17259; Got2; Gs1; CG4825; ppl…
GO:0048583	6.87403e-24	2.04211	288.378	427	881	regulation of response to stimulus	9.43678e-23	CkIIalpha; Roc1a; SkpA; AMPKalpha; inc; dor; Rbcn-3B; CG14812; Pgd; pn; sgg; CG32795; Rala; VhaAC39-1; Fas2; CHOp24; RhoGAP5A; CG4078; MAPk-Ak2; Spt6; CG3198; ct; slpr; Crag; Ppt1; e(r); Dsor1; CG34408; flw; cpa; mago; Sara; Egfr; Tim10; Fkbp14; Swim; Vps20; asrij; Dcp-1; Sesn; Galphas; MAN1; Nxt1; Dat; spag; Nurf-38; key; Eps-15; E(bx); CG3402; Cypl; CG32479; Trh; trio; Sac1; Rabex-5; Rac1; Cdc3…
GO:0055086	8.58114e-24	3.18393	103.109	189	315	nucleobase-containing small molecule metabolic process	1.16671e-22	CG32230; CG17896; CG14786; Pgd; CG3621; pn; l(1)G0334; CG3446; CG3192; CG18624; ND75; CG12065; e(r); su(r); Hex-A; l(1)G0230; ras; CG4302; CG10320; Ppcdc; blw; CG13551; levy; Tal; Galphas; cN-IIIB; NDUFA8; mtacp1; CG16758; CG12016; CG17333; sesB; FucT6; CG32649; ade5; CG9940; nmdyn-D6; CG5548; Gapdh2; CG9172; CG3560; CG5703; Pfrx; Zw; Adgf-A; CG7580; CG7724; CG4169; ms(3)72Dt; CG10688; nst; Adk1;…
GO:0051716	1.22304e-23	1.68939	589.848	777	1802	cellular response to stimulus	1.64703e-22	CG9578; Rab35; CkIIalpha; Roc1a; SkpA; Rbf; AMPKalpha; dor; Ns3; Rbcn-3B; usp; Edem1; CG14812; csw; Pgd; pn; CG3071; Nmd3; wds; sgg; eIF2B-beta; Rala; VhaAC39-1; mei-9; Fas2; CHOp24; CG3527; Cbp80; Mcm3; XRCC1; RhoGAP5A; CG4078; CG16721; MAPk-Ak2; CG32758; Rab18; Mipp2; Marf; schlank; CG3198; ogre; Atg5; ct; Rab39; Tom40; Gclc; Trxr-1; slpr; Nrg; Crag; e(r); l(1)G0020; Arfrp1; Dsor1; CG7246; Lst8…
GO:0050794	2.33902e-23	1.54165	988.208	1213	3019	regulation of cellular process	3.12016e-22	Rab35; CkIIalpha; elav; Appl; Roc1a; SkpA; sdk; Rbf; AMPKalpha; CG14786; CG3719; DAAM; dor; MED18; mip130; Rbcn-3B; Ocrl; east; CG4199; usp; Edem1; Pgam5; CG14812; csw; Pgd; pn; CG3071; crn; wds; Zw10; CG8636; sgg; eIF2B-beta; Rala; VhaAC39-1; lva; tyf; CG2982; mei-9; Fas2; CHOp24; Cbp80; Torsin; rb; snf; Cdk7; Mcm3; RhoGAP5A; spoon; CG4119; CG4078; CG16721; GAA1; MAPk-Ak2; CG32758; Rab18; CG5941…
GO:0043412	6.95249e-23	1.85784	378.393	531	1156	macromolecule modification	9.18769e-22	CkIIalpha; CG3038; Roc1a; SkpA; CG11412; AMPKalpha; CG4045; CG4406; Pgam5; csw; Pgd; wds; Zw10; sgg; ttm50; Rala; CG2982; Nsun2; CG3527; rb; Ptp4E; Cdk7; CG4165; RhoGAP5A; CG3016; GAA1; MAPk-Ak2; CG3781; wuho; PpV; Ubi-p5E; nonC; CG3198; Pdp; UbcE2H; CG11190; slpr; Ppt1; Dsor1; Ost48; l(1)G0232; flw; PPP4R2r; Ipod; Atg8a; cpa; CG30291; mago; Sgf29; CG4038; Egfr; Fkbp14; CG4610; CG2852; Cdk9; CG35…
GO:1901657	8.04147e-23	4.31288	62.8473	129	192	glycosyl compound metabolic process	1.05284e-21	CG32230; CG14786; CG3621; l(1)G0334; CG3446; CG3192; CG18624; ND75; CG12065; Hex-A; l(1)G0230; ras; CG10320; Ppcdc; blw; levy; cN-IIIB; NDUFA8; mtacp1; CG16758; CG12016; sesB; CG32649; nmdyn-D6; CG5548; Gapdh2; CG9172; CG3560; CG5703; Pfrx; Adgf-A; CG7580; CG4169; ms(3)72Dt; Adk1; l(3)neo18; CG6463; ATPsyn-b; CG3434; Prat2; ImpL3; Ppat-Dpck; CG4769; Pdsw; CG12400; CG17224; Pgk; CG3214; AIF; Eno; …
GO:0010256	9.30808e-23	5.51078	47.4628	105	145	endomembrane system organization	1.20749e-21	rush; dor; Zw10; GAA1; Marf; p115; Crag; AP-1gamma; Ost48; Tango5; GM130; Nup214; Snap29; fwd; Klp61F; alpha-Spec; ecd; scramb2; kst; Strip; Tango4; comt; Tango2; Nup93-1; Gmap; shi; Chc; mbt; beta-Spec; car; Cdc42; Grasp65; nes; TSG101; CG13049; Arl1; CG32082; scramb1; Use1; Arp3; Rint1; CG10075; Dd; Sec5; Sec24CD; jagn; Sec8; Sec23; Pi4KIIalpha; CG31650; Rtnl1; Lam; CG9135; Tango1; wol; PIG-U; …
GO:0044802	3.53217e-22	4.73951	54.3367	115	166	single-organism membrane organization	4.54045e-21	Sec22; TRAM; dor; Zw10; ttm50; GAA1; Marf; p115; Crag; Tim10; Nup214; Snap29; Vti1; alpha-Spec; nSyb; scramb2; kst; Syx17; Gtp-bp; comt; Nup93-1; shi; CG4301; X11L; beta-Spec; car; Cdc42; alphaSnap; NA; nes; CG7603; Arl1; Syx13; CG32082; CG6404; scramb1; SH3PX1; Srp68; CG4942; SrpRbeta; Arp3; Srp9; Sec63; Srp19; Membrin; Srp54k; Dd; Sec5; Rab5; Sec24CD; CG2023; Sec8; Sec23; Vps24; Lam; Sec61alpha…
GO:0044087	5.38825e-22	3.64966	75.9405	147	232	regulation of cellular component biogenesis	6.86396e-21	SkpA; DAAM; dor; Ocrl; sgg; Fas2; spoon; Top3beta; mys; HP1b; cpa; mago; NC2alpha; Rae1; gbb; tsr; HSPC300; DCP1; Eps-15; trio; Rac1; alpha-Spec; CG12082; Rop; Src64B; dsh; dlg1; Bap60; Rbp1-like; caz; Rok; if; Arpc3B; beta-Spec; par-6; car; Cdc42; pcm; gig; Rab8; Lasp; Pex3; blue; Abp1; flr; RhoGAP68F; simj; Arp3; LanA; mad2; mxt; Arpc5; CG7261; cpb; kis; Rheb; Sec23; kra; Gel; Arpc4; chic; Hrb2…
GO:0009123	6.84861e-22	4.91543	51.3908	110	157	nucleoside monophosphate metabolic process	8.64637e-21	CG32230; CG14786; CG3621; l(1)G0334; CG3446; CG3192; CG18624; ND75; Hex-A; l(1)G0230; ras; CG10320; blw; levy; cN-IIIB; NDUFA8; mtacp1; sesB; CG32649; ade5; CG5548; Gapdh2; CG9172; CG3560; CG5703; Pfrx; CG7580; CG4169; ms(3)72Dt; Adk1; l(3)neo18; CG6463; ATPsyn-b; CG6767; Prat2; ImpL3; CG4769; Pdsw; CG12400; Ts; Pgk; CG3214; AIF; Eno; RFeSP; CG2789; CG11455; CG6020; cype; CG9140; ade2; CoVb; ade3…
GO:0006753	8.82665e-22	3.22102	91.6523	169	280	nucleoside phosphate metabolic process	1.1045e-20	CG32230; CG14786; Pgd; CG3621; pn; l(1)G0334; CG3446; CG3192; CG18624; ND75; e(r); Hex-A; l(1)G0230; ras; CG4302; CG10320; Ppcdc; blw; CG13551; levy; Tal; Galphas; cN-IIIB; NDUFA8; mtacp1; CG12016; CG17333; sesB; FucT6; CG32649; ade5; CG9940; nmdyn-D6; CG5548; Gapdh2; CG9172; CG3560; CG5703; Pfrx; Zw; CG7580; CG7724; CG4169; ms(3)72Dt; CG10688; nst; Adk1; l(3)neo18; Aps; CG11811; CG6463; ATPsyn-b…
GO:0009161	1.4908e-21	4.86951	51.0634	109	156	ribonucleoside monophosphate metabolic process	1.84911e-20	CG32230; CG14786; CG3621; l(1)G0334; CG3446; CG3192; CG18624; ND75; Hex-A; l(1)G0230; ras; CG10320; blw; levy; cN-IIIB; NDUFA8; mtacp1; sesB; CG32649; ade5; CG5548; Gapdh2; CG9172; CG3560; CG5703; Pfrx; CG7580; CG4169; ms(3)72Dt; Adk1; l(3)neo18; CG6463; ATPsyn-b; CG6767; Prat2; ImpL3; CG4769; Pdsw; CG12400; Pgk; CG3214; AIF; Eno; RFeSP; CG2789; CG11455; CG6020; cype; CG9140; ade2; CoVb; ade3; l(…
GO:0009116	1.51416e-21	4.17491	61.538	125	188	nucleoside metabolic process	1.86175e-20	CG32230; CG14786; CG3621; l(1)G0334; CG3446; CG3192; CG18624; ND75; CG12065; Hex-A; l(1)G0230; ras; CG10320; Ppcdc; blw; levy; cN-IIIB; NDUFA8; mtacp1; CG16758; CG12016; sesB; CG32649; nmdyn-D6; CG5548; Gapdh2; CG9172; CG3560; CG5703; Pfrx; Adgf-A; CG7580; CG4169; ms(3)72Dt; Adk1; l(3)neo18; CG6463; ATPsyn-b; CG3434; Prat2; ImpL3; Ppat-Dpck; CG4769; Pdsw; CG12400; CG17224; Pgk; CG3214; AIF; Eno; …
GO:0006091	1.65165e-21	4.35054	58.2647	120	178	generation of precursor metabolites and energy	2.0133e-20	CG32230; CG14786; CG3621; l(1)G0334; spoon; kdn; CG3446; l(1)G0255; CG3192; CG18624; ND75; Hex-A; CG10320; blw; levy; NDUFA8; mtacp1; Scsalpha; Rpd3; CG32649; CG5548; CG5599; HDAC6; Gapdh2; CG9172; CG3560; CG5703; CG12203; Pfrx; l(1)G0156; CG7430; CG7580; Nc73EF; CG4169; Pgm; Atg1; l(3)neo18; CG6463; Surf1; ImpL3; Sucb; CG4769; Pdsw; CG12400; Pgk; CG3214; GlyP; AIF; Eno; RFeSP; CG2789; CG11455; C…
GO:0051640	3.83889e-21	3.5559	75.6132	145	231	organelle localization	4.63949e-20	Ns3; east; Nmd3; Vap-33A; lva; rb; ctp; sqh; nonC; cm; Ppt1; Moe; AP-1gamma; ric8a; flw; sktl; Synj; CycB; or; gammaSnap1; slik; Eps-15; nSyb; msn; Rop; Syx17; sesB; Ran; Klp10A; dlg1; Tomosyn; comt; Lsd-2; shi; Chc; Rok; X11L; AP-1-2beta; Clc; polo; alphaSnap; CG14184; Sec3; Dab; nudC; Arl1; fwe; AGO2; Gl; Syx13; Nrx-IV; nudE; Klp67A; Exo70; lqf; Galphai; sfl; Syx16; Sec5; Snapin; Drp1; Rab5; l(…
GO:0048193	5.78258e-21	7.50565	33.0603	79	101	Golgi vesicle transport	6.92929e-20	CG4293; Sec22; deltaCOP; Zw10; CHOp24; GAA1; p115; Ykt6; Crag; Gga; GM130; Golgin245; alphaCOP; Syx17; p24-1; Tomosyn; comt; g; opm; Gmap; betaCOP; alphaSnap; l(3)76BDm; zetaCOP; Arl1; CG7011; Use1; CG7197; Rint1; Membrin; Syx16; Sec5; Cog3; Sec24CD; Arf79F; Sec23; Madm; epsilonCOP; CG8552; PIG-U; Trs23; scat; KdelR; beta'COP; Sec71; Rab14; fws; bru; p24-2; eca; Snap24; Nsf2; ldlCp; Trs33; SIDL; …
GO:0009117	5.86997e-21	3.16141	90.6703	166	277	nucleotide metabolic process	6.97491e-20	CG32230; CG14786; Pgd; CG3621; pn; l(1)G0334; CG3446; CG3192; CG18624; ND75; e(r); Hex-A; l(1)G0230; ras; CG4302; CG10320; Ppcdc; blw; CG13551; levy; Tal; Galphas; NDUFA8; mtacp1; CG12016; CG17333; sesB; FucT6; CG32649; ade5; CG9940; nmdyn-D6; CG5548; Gapdh2; CG9172; CG3560; CG5703; Pfrx; Zw; CG7580; CG7724; CG4169; ms(3)72Dt; CG10688; nst; Adk1; l(3)neo18; Aps; CG11811; CG6463; ATPsyn-b; CG6767;…
GO:0050896	6.1091e-21	1.51903	917.505	1124	2803	response to stimulus	7.19855e-20	CG9578; Rab35; CkIIalpha; Appl; Roc1a; SkpA; Rbf; ssx; AMPKalpha; DAAM; inc; dor; Ns3; Rbcn-3B; usp; Edem1; Pgam5; Pex5; CG14812; csw; Pgd; pn; CG3071; Nmd3; wds; tko; sgg; eIF2B-beta; CG32795; Rala; VhaAC39-1; Vap-33A; tyf; mei-9; Fas2; CHOp24; CG3527; Cbp80; Ptp4E; Mcm3; XRCC1; CG16756; RhoGAP5A; spoon; CG4078; CG16721; CG3011; CG3016; MAPk-Ak2; CG32758; Rab18; sqh; Mipp2; Spt6; Marf; schlank; …
GO:0008380	1.22584e-20	3.08032	93.289	169	285	RNA splicing	1.43251e-19	crn; CG2685; Cbp80; snf; CG4119; CG3198; c12.1; Bx42; CG9344; mago; LSm1; CG4266; qkr58E-1; vir; CG7028; Cypl; Cdc5; CG13900; pUf68; CG2021; CG7879; ecd; l(1)10Bb; Tango4; REG; CG1622; Rbp1-like; l(1)G0007; CG5877; CG6227; caz; nonA; U2af50; SmG; CG7288; Prp3; asf1; CG6841; CG7564; Pep; U4-U6-60K; Smn; Zn72D; l(3)72Ab; Prp31; SRm160; CG10754; SmD1; CG10418; yps; CG10907; ldbr; CG7185; lark; CG132…
GO:0009126	1.47622e-20	4.78853	49.4268	105	151	purine nucleoside monophosphate metabolic process	1.69705e-19	CG32230; CG14786; CG3621; l(1)G0334; CG3446; CG3192; CG18624; ND75; Hex-A; l(1)G0230; ras; CG10320; blw; levy; NDUFA8; mtacp1; sesB; CG32649; ade5; CG5548; Gapdh2; CG9172; CG3560; CG5703; Pfrx; CG7580; CG4169; ms(3)72Dt; Adk1; l(3)neo18; CG6463; ATPsyn-b; Prat2; ImpL3; CG4769; Pdsw; CG12400; Pgk; CG3214; AIF; Eno; RFeSP; CG2789; CG11455; CG6020; cype; CG9140; ade2; CoVb; ade3; l(2)06225; Vha68-2;…
GO:0009167	1.47622e-20	4.78853	49.4268	105	151	purine ribonucleoside monophosphate metabolic process	1.69705e-19	CG32230; CG14786; CG3621; l(1)G0334; CG3446; CG3192; CG18624; ND75; Hex-A; l(1)G0230; ras; CG10320; blw; levy; NDUFA8; mtacp1; sesB; CG32649; ade5; CG5548; Gapdh2; CG9172; CG3560; CG5703; Pfrx; CG7580; CG4169; ms(3)72Dt; Adk1; l(3)neo18; CG6463; ATPsyn-b; Prat2; ImpL3; CG4769; Pdsw; CG12400; Pgk; CG3214; AIF; Eno; RFeSP; CG2789; CG11455; CG6020; cype; CG9140; ade2; CoVb; ade3; l(2)06225; Vha68-2;…
GO:0016310	1.77607e-20	2.24851	182.65	286	558	phosphorylation	2.02529e-19	CG32230; CkIIalpha; SkpA; AMPKalpha; CG14786; Pgd; CG3621; sgg; Rala; l(1)G0334; Cdk7; RhoGAP5A; MAPk-Ak2; CG3446; nonC; CG3192; CG3198; CG18624; ND75; slpr; Dsor1; Hex-A; flw; cpa; CG30291; sktl; mago; Egfr; CG10320; Cdk9; levy; l(2)efl; gek; CG3608; NDUFA8; slik; Pdk1; fwd; CG7028; Sac1; mtacp1; Rac1; Cdc37; msn; Strip; CG12082; Eip63E; Src64B; hop; CkIIbeta; CkIalpha; CG32649; lic; CG15743; be…
GO:0009119	2.98901e-20	4.13234	58.2647	118	178	ribonucleoside metabolic process	3.38117e-19	CG32230; CG14786; CG3621; l(1)G0334; CG3446; CG3192; CG18624; ND75; Hex-A; l(1)G0230; ras; CG10320; Ppcdc; blw; levy; cN-IIIB; NDUFA8; mtacp1; sesB; CG32649; nmdyn-D6; CG5548; Gapdh2; CG9172; CG3560; CG5703; Pfrx; Adgf-A; CG7580; CG4169; ms(3)72Dt; Adk1; l(3)neo18; CG6463; ATPsyn-b; CG3434; ImpL3; Ppat-Dpck; CG4769; Pdsw; CG12400; Pgk; CG3214; AIF; Eno; RFeSP; Tgt; CG2789; CG11455; fbl; CG6020; C…
GO:0051656	3.47457e-20	3.74736	66.4479	130	203	establishment of organelle localization	3.89924e-19	Ns3; east; Nmd3; Vap-33A; lva; rb; ctp; sqh; nonC; cm; Ppt1; Moe; AP-1gamma; ric8a; flw; Synj; CycB; or; gammaSnap1; slik; Eps-15; nSyb; msn; Rop; Syx17; sesB; Ran; Klp10A; dlg1; Tomosyn; comt; shi; Chc; Rok; X11L; AP-1-2beta; Clc; polo; alphaSnap; Sec3; Dab; nudC; Arl1; fwe; AGO2; Gl; Syx13; Nrx-IV; nudE; Klp67A; Exo70; lqf; Galphai; sfl; Syx16; Sec5; Snapin; Drp1; Rab5; l(2)gl; Csp; Chro; Arf79…
GO:0032940	5.0619e-20	3.61655	69.3939	134	212	secretion by cell	5.63585e-19	Rab35; deltaCOP; Vap-33A; CHOp24; rb; cm; p115; AP-1gamma; Tango5; Tango11; Synj; gbb; or; gammaSnap1; Snap29; CG3608; Letm1; Eps-15; Klp61F; nSyb; Rop; Syx17; Gtp-bp; p24-1; Tango4; Tomosyn; comt; Tango13; Tango2; g; opm; HDAC6; Chc; X11L; car; AP-1-2beta; Clc; alphaSnap; Sec3; Arl1; Syx13; Nrx-IV; Use1; Exo70; lqf; Syx16; Sec5; Snapin; Slh; Sec24CD; Tango14; l(2)gl; CG7338; Cdk12; Csp; Arf79F; …
GO:0051246	8.64701e-20	2.39609	149.59	242	457	regulation of protein metabolic process	9.55225e-19	CkIIalpha; SkpA; CG14786; CG14812; Pgd; wds; Zw10; sgg; eIF2B-beta; Rala; tyf; rb; Cdk7; RhoGAP5A; MAPk-Ak2; CG5941; CG3198; slpr; Dsor1; flw; PPP4R2r; Atg8a; cpa; CG30291; mago; CG10306; eIF2B-delta; l(2)efl; Lpt; eIF-5A; Not11; slik; Sac1; Rabex-5; CG12084; Rac1; Cdc37; Patj; msn; Jafrac2; Strip; CG12082; ida; Rpd3; Src64B; CkIalpha; lic; REG; ben; mbt; Rok; CG9099; par-6; fu; car; Rcd-1; gig; …
GO:0048522	9.16681e-20	1.84357	325.366	457	994	positive regulation of cellular process	1.0048e-18	CkIIalpha; SkpA; DAAM; usp; Pgam5; CG14812; Pgd; pn; CG3071; wds; sgg; lva; tyf; CHOp24; CG5941; Spt6; Marf; Top3beta; schlank; CG3198; NELF-B; fs(1)h; slpr; Crag; Ppt1; e(r); Moe; HP1b; dalao; Dsor1; fh; Act57B; mago; Egfr; NC2alpha; Swim; GM130; Dcp-1; gbb; Lpt; Galphas; eIF-5A; Chi; HSPC300; DCP1; CG3608; Nurf-38; slik; zip; key; Pdk1; E(bx); CG32479; trio; Rabex-5; Rac1; Psf1; Cdc37; alpha-Sp…
GO:0043039	1.07408e-19	Inf	12.7659	39	39	tRNA aminoacylation	1.16826e-18	CG10802; CG2263; Aats-lys; CG30185; Aats-tyr-m; Aats-pro; Aats-leu; CG8097; Aats-arg; Aats-his; CG7441; Aats-tyr; CG4573; Aats-gly; mRpL39; CG5660; Aats-ala-m; CG33123; CG17259; Aats-ile; Aats-ala; Aats-thr; CG31739; Aats-asn; CG10092; Aats-trp; Aats-met; Aats-ser; Aats-glupro; CG5463; CG5706; Aats-gln; CG15100; CG6796; Aats-cys; CG8257; Aats-val; Aats-asp; CG5414
GO:0009057	1.41471e-19	2.62474	120.13	203	367	macromolecule catabolic process	1.52703e-18	SkpA; Edem1; wds; Zw10; sgg; CG4165; CG3016; Top3beta; Ubi-p5E; nonC; Upf2; Ppt1; Moe; Idgf4; Prosalpha3; Vps20; Not11; Upf3; DCP1; Pym; snama; CG3356; Rpn8; slik; CG30421; key; CG32479; CG9153; Cht2; CG12082; Cht7; ida; Rpt3; CG2247; Upf1; Usp7; CkIalpha; REG; shtd; CG8184; Prosalpha4; CG9086; CG7288; CG7280; Rcd-1; pcm; Rpn1; l(3)76BDr; Rpn12; PGRP-SB1; Prosbeta6; Prosbeta2; Vps36; Atg1; vih; R…
GO:0000375	2.4228e-19	3.04247	88.7064	160	271	RNA splicing, via transesterification reactions	2.59533e-18	crn; CG2685; Cbp80; snf; CG4119; CG3198; c12.1; Bx42; CG9344; mago; LSm1; CG4266; qkr58E-1; vir; CG7028; Cypl; Cdc5; CG13900; pUf68; CG2021; CG7879; ecd; l(1)10Bb; Tango4; REG; CG1622; Rbp1-like; l(1)G0007; CG5877; CG6227; caz; nonA; U2af50; SmG; CG7288; Prp3; asf1; CG6841; CG7564; Pep; U4-U6-60K; Smn; Zn72D; l(3)72Ab; Prp31; SRm160; CG10754; SmD1; CG10418; yps; CG10907; ldbr; CG7185; lark; CG132…
GO:0042254	2.45221e-19	8.73267	27.1684	67	83	ribosome biogenesis	2.60709e-18	sta; Ns3; CG3071; Nmd3; CG2875; CG3527; RpL7A; RpS6; RpS28b; CG2972; CG4038; Fib; eIF6; Nop60B; CG11583; Rtc1; CG8939; CG12301; NHP2; RpS17; CG8549; CG32409; RpS21; Rrp40; dbe; mRpL10; mTerf3; CG7338; RpLP0; Ddx1; Rheb; nop5; CG13097; hoip; CG4364; CG6724; CG6712; Tor; Nnp-1; Ns4; mtTFB2; RpL24-like; CG9799; Mat89Ba; Ns1; l(3)07882; Surf6; CG17141; CG5728; CG7006; CG11837; RpS8; CG1542; RpS18; CG…
GO:0042278	2.76609e-19	4.08951	55.9734	113	171	purine nucleoside metabolic process	2.89722e-18	CG32230; CG14786; CG3621; l(1)G0334; CG3446; CG3192; CG18624; ND75; Hex-A; l(1)G0230; ras; CG10320; Ppcdc; blw; levy; cN-IIIB; NDUFA8; mtacp1; sesB; CG32649; nmdyn-D6; CG5548; Gapdh2; CG9172; CG3560; CG5703; Pfrx; Adgf-A; CG7580; CG4169; ms(3)72Dt; Adk1; l(3)neo18; CG6463; ATPsyn-b; ImpL3; Ppat-Dpck; CG4769; Pdsw; CG12400; Pgk; CG3214; AIF; Eno; RFeSP; CG2789; CG11455; fbl; CG6020; CG5828; cype; …
GO:0046128	2.76609e-19	4.08951	55.9734	113	171	purine ribonucleoside metabolic process	2.89722e-18	CG32230; CG14786; CG3621; l(1)G0334; CG3446; CG3192; CG18624; ND75; Hex-A; l(1)G0230; ras; CG10320; Ppcdc; blw; levy; cN-IIIB; NDUFA8; mtacp1; sesB; CG32649; nmdyn-D6; CG5548; Gapdh2; CG9172; CG3560; CG5703; Pfrx; Adgf-A; CG7580; CG4169; ms(3)72Dt; Adk1; l(3)neo18; CG6463; ATPsyn-b; ImpL3; Ppat-Dpck; CG4769; Pdsw; CG12400; Pgk; CG3214; AIF; Eno; RFeSP; CG2789; CG11455; fbl; CG6020; CG5828; cype; …
GO:0015980	2.80733e-19	4.90382	44.8442	96	137	energy derivation by oxidation of organic compounds	2.9188e-18	CG32230; CG3621; spoon; kdn; CG3446; l(1)G0255; CG3192; CG18624; ND75; CG10320; levy; NDUFA8; mtacp1; Scsalpha; Rpd3; CG32649; CG5548; CG5599; HDAC6; CG9172; CG3560; CG5703; l(1)G0156; CG7430; CG7580; Nc73EF; CG4169; Pgm; Atg1; l(3)neo18; CG6463; Surf1; Sucb; CG4769; Pdsw; CG12400; CG3214; GlyP; AIF; RFeSP; CG11455; CG6020; cype; Gpdh; CG9140; CoVb; smt3; Rack1; CG8475; CG9306; l(2)35Di; CoIV; ba…
GO:0009141	3.14967e-19	4.60147	48.1175	101	147	nucleoside triphosphate metabolic process	3.25083e-18	CG32230; CG14786; CG3621; l(1)G0334; CG3446; CG3192; CG18624; ND75; Hex-A; l(1)G0230; CG10320; blw; levy; NDUFA8; mtacp1; sesB; CG32649; nmdyn-D6; CG5548; Gapdh2; CG9172; CG3560; CG5703; Pfrx; CG7580; CG4169; ms(3)72Dt; Adk1; l(3)neo18; CG6463; ATPsyn-b; ImpL3; CG4769; Pdsw; CG12400; Pgk; CG3214; AIF; Eno; RFeSP; CG2789; CG11455; CG6020; CG8891; cype; CG9140; CoVb; dUTPase; l(2)06225; Vha68-2; Vh…
GO:0006605	3.189e-19	4.40333	50.7361	105	155	protein targeting	3.26757e-18	TRAM; dor; Vps26; Pex5; sgg; Tom40; Act57B; Tim10; Nup214; Golgin245; pav; Hsp60; hop; Gtp-bp; Tim8; Tim9a; Nup93-1; Gmap; exd; Stim; Nup153; fu; car; Tim9b; Nup205; Kap-alpha1; Tom20; CG8004; Arl1; Pex1; CG7394; Srp68; SrpRbeta; msk; CG7197; Srp9; Sec63; Srp19; Trn; Rcc1; Srp54k; Ntf-2; Trn-SR; Slh; Sec24CD; Pex12; lwr; eRF1; Pex14; Sec23; noi; Karybeta3; Hsp60C; CG7382; Sec61alpha; smt3; CG7214…
GO:0006418	3.30213e-19	Inf	12.4385	38	38	tRNA aminoacylation for protein translation	3.35914e-18	CG10802; CG2263; Aats-lys; Aats-tyr-m; Aats-pro; Aats-leu; CG8097; Aats-arg; Aats-his; CG7441; Aats-tyr; CG4573; Aats-gly; mRpL39; CG5660; Aats-ala-m; CG33123; CG17259; Aats-ile; Aats-ala; Aats-thr; CG31739; Aats-asn; CG10092; Aats-trp; Aats-met; Aats-ser; Aats-glupro; CG5463; CG5706; Aats-gln; CG15100; CG6796; Aats-cys; CG8257; Aats-val; Aats-asp; CG5414
GO:0006334	3.52666e-19	12.0769	22.2584	58	68	nucleosome assembly	3.56192e-18	Nap1; E(bx); asf1; NA; Caf1; Set; XNP; Acf1; Df31; P32; Iswi; His1:CG33807; His1:CG33834; Chrac-14
GO:0000377	4.46264e-19	3.02268	88.379	159	270	RNA splicing, via transesterification reactions with bulged adenosine as nucleophile	4.44379e-18	crn; CG2685; Cbp80; snf; CG4119; CG3198; c12.1; Bx42; CG9344; mago; LSm1; CG4266; qkr58E-1; vir; CG7028; Cypl; Cdc5; CG13900; pUf68; CG2021; CG7879; ecd; l(1)10Bb; Tango4; REG; CG1622; Rbp1-like; l(1)G0007; CG5877; CG6227; caz; nonA; U2af50; SmG; CG7288; Prp3; asf1; CG6841; CG7564; Pep; U4-U6-60K; Smn; Zn72D; l(3)72Ab; Prp31; SRm160; CG10754; SmD1; CG10418; yps; CG10907; CG7185; lark; CG13298; Di…
GO:0000398	4.46264e-19	3.02268	88.379	159	270	mRNA splicing, via spliceosome	4.44379e-18	crn; CG2685; Cbp80; snf; CG4119; CG3198; c12.1; Bx42; CG9344; mago; LSm1; CG4266; qkr58E-1; vir; CG7028; Cypl; Cdc5; CG13900; pUf68; CG2021; CG7879; ecd; l(1)10Bb; Tango4; REG; CG1622; Rbp1-like; l(1)G0007; CG5877; CG6227; caz; nonA; U2af50; SmG; CG7288; Prp3; asf1; CG6841; CG7564; Pep; U4-U6-60K; Smn; Zn72D; l(3)72Ab; Prp31; SRm160; CG10754; SmD1; CG10418; yps; CG10907; CG7185; lark; CG13298; Di…
GO:0006464	4.8274e-19	1.77347	361.045	496	1103	cellular protein modification process	4.74023e-18	CkIIalpha; CG3038; Roc1a; SkpA; CG11412; AMPKalpha; CG4406; Pgam5; csw; Pgd; wds; Zw10; sgg; ttm50; Rala; CG2982; rb; Ptp4E; Cdk7; CG4165; RhoGAP5A; CG3016; GAA1; MAPk-Ak2; CG3781; PpV; Ubi-p5E; nonC; CG3198; Pdp; UbcE2H; CG11190; slpr; Ppt1; Dsor1; Ost48; l(1)G0232; flw; PPP4R2r; Atg8a; cpa; CG30291; mago; Sgf29; Egfr; Fkbp14; CG2852; Cdk9; CG3530; l(2)efl; Lpt; snama; CG3356; gek; CG3511; CG360…
GO:0036211	4.8274e-19	1.77347	361.045	496	1103	protein modification process	4.74023e-18	CkIIalpha; CG3038; Roc1a; SkpA; CG11412; AMPKalpha; CG4406; Pgam5; csw; Pgd; wds; Zw10; sgg; ttm50; Rala; CG2982; rb; Ptp4E; Cdk7; CG4165; RhoGAP5A; CG3016; GAA1; MAPk-Ak2; CG3781; PpV; Ubi-p5E; nonC; CG3198; Pdp; UbcE2H; CG11190; slpr; Ppt1; Dsor1; Ost48; l(1)G0232; flw; PPP4R2r; Atg8a; cpa; CG30291; mago; Sgf29; Egfr; Fkbp14; CG2852; Cdk9; CG3530; l(2)efl; Lpt; snama; CG3356; gek; CG3511; CG360…
GO:0007154	5.77211e-19	1.59243	592.14	758	1809	cell communication	5.6288e-18	Rab35; CkIIalpha; Roc1a; SkpA; Rbf; AMPKalpha; dor; Ns3; Rbcn-3B; usp; Edem1; CG14812; csw; Pgd; pn; CG3071; Nmd3; sgg; Rala; VhaAC39-1; Vap-33A; Fas2; CHOp24; CG3527; XRCC1; RhoGAP5A; CG16721; MAPk-Ak2; CG32758; Rab18; Mipp2; schlank; Mcm6; nonC; CG3198; Inx2; cm; ogre; CG32732; Atg5; ct; Rab39; UbcE2H; Upf2; slpr; Nrg; CG12065; Crag; Ppt1; e(r); l(1)G0020; Arfrp1; AP-1gamma; Dsor1; CG7246; Lst8…
GO:0031497	6.11807e-19	8.60019	26.841	66	82	chromatin assembly	5.92531e-18	HP1b; Nap1; E(bx); Bap60; asf1; Trl; Su(var)205; NA; Caf1; Set; XNP; Nlp; Acf1; Df31; mle; Dp1; P32; Su(var)2-HP2; Iswi; His1:CG33807; His1:CG33834; Chrac-14
GO:0034660	1.12111e-18	3.98313	55.9734	112	171	ncRNA metabolic process	1.0784e-17	sta; CG4045; CG3071; CG10802; Nsun2; CG3527; IntS6; RpS6; CG2263; Aats-lys; CG2972; CG4038; CG4610; Fib; CG30185; IntS1; Nop60B; Aats-tyr-m; Aats-pro; CG32281; IntS10; Aats-leu; CG1434; CG8097; CG8939; Aats-arg; IntS2; Aats-his; CG7441; Aats-tyr; CG4573; IntS9; CG12301; Aats-gly; mRpL39; NHP2; defl; CG5660; CG8549; Aats-ala-m; CG33123; RpS21; CG17259; Rrp40; dbe; Rpp30; Aats-ile; CG9596; nop5; CG…
GO:0051186	1.20686e-18	5.96914	35.3516	80	108	cofactor metabolic process	1.15304e-17	cin; Pgd; l(1)G0334; COQ7; Sptr; Hex-A; Ppcdc; Tal; Alas; CG3803; CG12016; CG17333; v; CG1749; CG2543; CG2453; CG9940; pdgy; CG8239; Gapdh2; scu; Pfrx; Zw; CG32174; ImpL3; Ppat-Dpck; mal; CG3714; Pgk; Eno; fbl; CG9804; CG5828; CG7277; Gpdh; Coprox; CG5261; CG13090; CG9249; CG8665; Dpck; sgll; CG2846; Nmdmc; CG8199; Mical; pug; Ho; CG14721; Dhfr; Ppcs; CG6178; Ppox; Nmnat; Mocs2; Ald; CG11876; Pgl…
GO:0046903	2.78329e-18	3.30225	72.3399	135	221	secretion	2.64133e-17	Rab35; deltaCOP; Vap-33A; CHOp24; rb; cm; p115; AP-1gamma; Tango5; Tango11; Synj; gbb; or; gammaSnap1; Snap29; CG3608; Letm1; Eps-15; Klp61F; nSyb; Rop; Syx17; Gtp-bp; p24-1; Tango4; Tomosyn; comt; Tango13; Tango2; g; opm; HDAC6; Chc; Fur2; X11L; car; AP-1-2beta; Clc; alphaSnap; Sec3; Arl1; Syx13; Nrx-IV; Use1; Exo70; lqf; Syx16; Sec5; Snapin; Slh; Sec24CD; Tango14; l(2)gl; CG7338; Cdk12; Csp; Ar…
GO:0043038	2.93402e-18	80.9115	13.0932	39	40	amino acid activation	2.7658e-17	CG10802; CG2263; Aats-lys; CG30185; Aats-tyr-m; Aats-pro; Aats-leu; CG8097; Aats-arg; Aats-his; CG7441; Aats-tyr; CG4573; Aats-gly; mRpL39; CG5660; Aats-ala-m; CG33123; CG17259; Aats-ile; Aats-ala; Aats-thr; CG31739; Aats-asn; CG10092; Aats-trp; Aats-met; Aats-ser; Aats-glupro; CG5463; CG5706; Aats-gln; CG15100; CG6796; Aats-cys; CG8257; Aats-val; Aats-asp; CG5414
GO:0009199	3.02448e-18	4.46142	47.1355	98	144	ribonucleoside triphosphate metabolic process	2.83219e-17	CG32230; CG14786; CG3621; l(1)G0334; CG3446; CG3192; CG18624; ND75; Hex-A; l(1)G0230; CG10320; blw; levy; NDUFA8; mtacp1; sesB; CG32649; nmdyn-D6; CG5548; Gapdh2; CG9172; CG3560; CG5703; Pfrx; CG7580; CG4169; ms(3)72Dt; Adk1; l(3)neo18; CG6463; ATPsyn-b; ImpL3; CG4769; Pdsw; CG12400; Pgk; CG3214; AIF; Eno; RFeSP; CG2789; CG11455; CG6020; cype; CG9140; CoVb; l(2)06225; Vha68-2; Vha68-1; CG9306; l(…
GO:0033365	4.82508e-18	3.94076	54.6641	109	167	protein localization to organelle	4.48859e-17	TRAM; dor; Pex5; sgg; Tom40; Act57B; Tim10; Nup214; Golgin245; CG14977; pav; Hsp60; hop; Gtp-bp; Tim8; Tim9a; Nup93-1; Gmap; exd; Stim; Nup153; fu; car; Tim9b; Nup205; Kap-alpha1; Tom20; CG8004; Mi-2; SsRbeta; Arl1; Gl; Pex1; CG7394; Srp68; SrpRbeta; msk; CG7197; Srp9; Sec63; Srp19; Trn; Rcc1; Srp54k; Ntf-2; Trn-SR; Pex12; lwr; Pex14; noi; Pi4KIIalpha; Karybeta3; Lam; Hsp60C; CG7382; Sec61alpha; …
GO:0009267	4.94379e-18	5.13688	39.6069	86	121	cellular response to starvation	4.56896e-17	CkIIalpha; AMPKalpha; dor; Ns3; CG3071; Nmd3; CG3527; Atg5; l(1)G0020; CG7246; CG2972; Atg8a; CG4038; Fib; Dcp-1; eIF6; Snap29; Nxt1; Nop60B; Atg2; Syx17; Ran; CkIIbeta; Rtc1; Atg101; car; pcm; HLH106; NA; Adgf-A; l(3)72Dn; CG12301; CG6878; NHP2; Atg1; Sod; SH3PX1; Atg18a; Atg17; CG9107; l(2)k09022; nop5; Rack1; CG13097; Bka; Tor; CG11975; Vps16A; ird1; RagA-B; Ras85D; Bruce; CG9799; foxo; GlyS; …
GO:0046034	6.37291e-18	4.5191	45.4988	95	139	ATP metabolic process	5.78853e-17	CG32230; CG14786; CG3621; l(1)G0334; CG3446; CG3192; CG18624; ND75; Hex-A; l(1)G0230; CG10320; blw; levy; NDUFA8; mtacp1; sesB; CG32649; CG5548; Gapdh2; CG9172; CG3560; CG5703; Pfrx; CG7580; CG4169; ms(3)72Dt; Adk1; l(3)neo18; CG6463; ATPsyn-b; ImpL3; CG4769; Pdsw; CG12400; Pgk; CG3214; AIF; Eno; RFeSP; CG2789; CG11455; CG6020; cype; CG9140; CoVb; l(2)06225; Vha68-2; Vha68-1; CG9306; l(2)35Di; Cy…
GO:0009144	6.38621e-18	4.41478	46.8082	97	143	purine nucleoside triphosphate metabolic process	5.78853e-17	CG32230; CG14786; CG3621; l(1)G0334; CG3446; CG3192; CG18624; ND75; Hex-A; l(1)G0230; CG10320; blw; levy; NDUFA8; mtacp1; sesB; CG32649; nmdyn-D6; CG5548; Gapdh2; CG9172; CG3560; CG5703; Pfrx; CG7580; CG4169; ms(3)72Dt; Adk1; l(3)neo18; CG6463; ATPsyn-b; ImpL3; CG4769; Pdsw; CG12400; Pgk; CG3214; AIF; Eno; RFeSP; CG2789; CG11455; CG6020; cype; CG9140; CoVb; l(2)06225; Vha68-2; Vha68-1; CG9306; l(…
GO:0009205	6.38621e-18	4.41478	46.8082	97	143	purine ribonucleoside triphosphate metabolic process	5.78853e-17	CG32230; CG14786; CG3621; l(1)G0334; CG3446; CG3192; CG18624; ND75; Hex-A; l(1)G0230; CG10320; blw; levy; NDUFA8; mtacp1; sesB; CG32649; nmdyn-D6; CG5548; Gapdh2; CG9172; CG3560; CG5703; Pfrx; CG7580; CG4169; ms(3)72Dt; Adk1; l(3)neo18; CG6463; ATPsyn-b; ImpL3; CG4769; Pdsw; CG12400; Pgk; CG3214; AIF; Eno; RFeSP; CG2789; CG11455; CG6020; cype; CG9140; CoVb; l(2)06225; Vha68-2; Vha68-1; CG9306; l(…
GO:0050793	9.80218e-18	1.99617	217.674	321	665	regulation of developmental process	8.82821e-17	SkpA; sdk; RpL22; DAAM; Ns3; usp; Pgam5; csw; sgg; Rala; lva; Fas2; CG3527; MAPk-Ak2; Rab18; Marf; Top3beta; mys; slpr; Ppt1; Rbm13; Dsor1; NA; fh; CG7246; mago; Egfr; Rae1; GM130; babos; Cdk9; l(2)06496; gbb; Chi; HSPC300; CG3608; Nurf-38; zip; Eps-15; Pdk1; fwd; CG7028; trio; Rabex-5; Rac1; alpha-Spec; R; msn; Hsp83; CG11583; Rop; Rpd3; Src64B; dyl; Dlic; dsh; hop; Ran; dlg1; bif; lic; Yp3; Pdc…
GO:0009966	1.13811e-17	2.03574	203.926	304	623	regulation of signal transduction	1.00833e-16	CkIIalpha; Roc1a; SkpA; AMPKalpha; dor; Rbcn-3B; CG14812; Pgd; pn; sgg; Rala; VhaAC39-1; Fas2; CHOp24; RhoGAP5A; MAPk-Ak2; CG3198; ct; slpr; Crag; e(r); Dsor1; CG34408; flw; cpa; mago; Sara; Egfr; Fkbp14; Swim; Vps20; asrij; MAN1; Nurf-38; Eps-15; E(bx); CG3402; CG32479; trio; Sac1; Rabex-5; Cdc37; msn; Atg2; Jafrac2; Strip; CG12082; CG14977; pav; ImpL2; Rpd3; CG1657; dsh; hop; PGRP-SA; CkIalpha;…
GO:0031669	1.14097e-17	4.99359	39.9342	86	122	cellular response to nutrient levels	1.00833e-16	CkIIalpha; AMPKalpha; dor; Ns3; CG3071; Nmd3; CG3527; Atg5; l(1)G0020; CG7246; CG2972; Atg8a; CG4038; Fib; Dcp-1; eIF6; Snap29; Nxt1; Nop60B; Atg2; Syx17; Ran; CkIIbeta; Rtc1; Atg101; car; pcm; HLH106; NA; Adgf-A; l(3)72Dn; CG12301; CG6878; NHP2; Atg1; Sod; SH3PX1; Atg18a; Atg17; CG9107; l(2)k09022; nop5; Rack1; CG13097; Bka; Tor; CG11975; Vps16A; ird1; RagA-B; Ras85D; Bruce; CG9799; foxo; GlyS; …
GO:0045333	1.14097e-17	4.99359	39.9342	86	122	cellular respiration	1.00833e-16	CG32230; CG3621; spoon; kdn; CG3446; l(1)G0255; CG3192; CG18624; ND75; CG10320; levy; NDUFA8; mtacp1; Scsalpha; Rpd3; CG32649; CG5548; CG5599; HDAC6; CG9172; CG3560; CG5703; l(1)G0156; CG7430; CG7580; Nc73EF; CG4169; l(3)neo18; CG6463; Surf1; Sucb; CG4769; Pdsw; CG12400; CG3214; AIF; RFeSP; CG11455; CG6020; cype; Gpdh; CG9140; CoVb; smt3; CG9306; l(2)35Di; CoIV; barr; Acon; CG9603; skap; CG5214; …
GO:0019693	2.27829e-17	3.25232	70.0486	130	214	ribose phosphate metabolic process	2.00093e-16	CG32230; CG14786; Pgd; CG3621; pn; l(1)G0334; CG3446; CG3192; CG18624; ND75; Hex-A; l(1)G0230; ras; CG10320; Ppcdc; blw; levy; Tal; Galphas; NDUFA8; mtacp1; CG17333; sesB; CG32649; ade5; nmdyn-D6; CG5548; Gapdh2; CG9172; CG3560; CG5703; Pfrx; Zw; CG7580; CG4169; ms(3)72Dt; Adk1; l(3)neo18; CG6463; ATPsyn-b; Prat2; ImpL3; Ppat-Dpck; CG4769; Pdsw; CG12400; Pgk; CG3214; AIF; Eno; RFeSP; CG2789; CG11…
GO:0032268	2.3453e-17	2.3059	141.406	225	432	regulation of cellular protein metabolic process	2.04707e-16	CkIIalpha; SkpA; CG14786; CG14812; Pgd; wds; Zw10; sgg; eIF2B-beta; Rala; tyf; rb; Cdk7; RhoGAP5A; MAPk-Ak2; CG5941; CG3198; slpr; Dsor1; flw; PPP4R2r; Atg8a; cpa; CG30291; mago; CG10306; eIF2B-delta; l(2)efl; Lpt; eIF-5A; Not11; slik; Sac1; Rabex-5; CG12084; Rac1; Cdc37; Patj; msn; Jafrac2; Strip; CG12082; ida; Rpd3; Src64B; CkIalpha; lic; REG; ben; mbt; Rok; CG9099; par-6; fu; car; Rcd-1; gig; …
GO:0010646	3.71805e-17	1.92213	236.659	342	723	regulation of cell communication	3.22535e-16	CkIIalpha; Roc1a; SkpA; AMPKalpha; dor; Rbcn-3B; CG14812; Pgd; pn; sgg; Rala; VhaAC39-1; Fas2; CHOp24; RhoGAP5A; MAPk-Ak2; CG3198; ct; slpr; Crag; Ppt1; e(r); Dsor1; CG34408; flw; cpa; mago; Sara; Egfr; Fkbp14; Swim; Vps20; asrij; Dcp-1; gbb; MAN1; CG3608; Nurf-38; Eps-15; E(bx); CG3402; CG32479; trio; Sac1; Rabex-5; Cdc37; alpha-Spec; msn; Atg2; Jafrac2; Strip; CG12082; CG14977; pav; ImpL2; Rpd3…
GO:0043623	4.92541e-17	3.99037	50.4088	101	154	cellular protein complex assembly	4.24666e-16	DAAM; dor; Vap-33A; spoon; sqh; AP-1gamma; cpa; Nup214; gammaSnap1; tsr; CG3803; betaTub60D; zip; Hsp83; CG12082; Rop; Tomosyn; CG12096; comt; CG9172; Arpc3B; car; Cdc42; Grip84; polo; alphaSnap; flr; CG6404; CG4942; Arp3; CG7506; Surf1; Srp54k; CG31961; gammaTub23C; Arpc5; Snapin; Sec24CD; CG7261; cpb; l(2)gl; Gel; Scox; CG31648; Arpc4; chic; Btk29A; CSN8; CG4908; SCAR; Arpc1; CG5869; Mhc; bsf; …
GO:0031668	5.74038e-17	4.72963	40.5889	86	124	cellular response to extracellular stimulus	4.91933e-16	CkIIalpha; AMPKalpha; dor; Ns3; CG3071; Nmd3; CG3527; Atg5; l(1)G0020; CG7246; CG2972; Atg8a; CG4038; Fib; Dcp-1; eIF6; Snap29; Nxt1; Nop60B; Atg2; Syx17; Ran; CkIIbeta; Rtc1; Atg101; car; pcm; HLH106; NA; Adgf-A; l(3)72Dn; CG12301; CG6878; NHP2; Atg1; Sod; SH3PX1; Atg18a; Atg17; CG9107; l(2)k09022; nop5; Rack1; CG13097; Bka; Tor; CG11975; Vps16A; ird1; RagA-B; Ras85D; Bruce; CG9799; foxo; GlyS; …
GO:0072594	5.79852e-17	4.22912	46.4808	95	142	establishment of protein localization to organelle	4.93922e-16	TRAM; dor; Pex5; sgg; Tom40; Act57B; Tim10; Nup214; Golgin245; pav; Hsp60; hop; Gtp-bp; Tim8; Tim9a; Nup93-1; Gmap; exd; Stim; Nup153; fu; car; Tim9b; Nup205; Kap-alpha1; Tom20; CG8004; Arl1; Pex1; CG7394; Srp68; SrpRbeta; msk; CG7197; Srp9; Sec63; Srp19; Trn; Rcc1; Srp54k; Ntf-2; Trn-SR; Pex12; lwr; Pex14; noi; Karybeta3; Hsp60C; CG7382; Sec61alpha; smt3; CG7214; Trp1; Nup107; Nup160; Tom70; cac…
GO:0006732	6.03923e-17	5.85697	32.4056	73	99	coenzyme metabolic process	5.11346e-16	cin; Pgd; l(1)G0334; COQ7; Sptr; Hex-A; Ppcdc; Tal; CG12016; CG17333; v; CG1749; CG2543; CG2453; CG9940; pdgy; CG8239; Gapdh2; scu; Pfrx; Zw; CG32174; ImpL3; Ppat-Dpck; mal; CG3714; Pgk; Eno; fbl; CG9804; CG5828; CG7277; Gpdh; CG5261; CG13090; CG9249; CG8665; Dpck; sgll; CG2846; Nmdmc; CG8199; Mical; pug; CG14721; Dhfr; Ppcs; CG6178; Nmnat; Mocs2; Ald; CG11876; Pglym78; Pcd; Tpi; CG7920; Dg; Gpo-…
GO:1901566	1.30283e-16	1.71596	348.934	472	1066	organonitrogen compound biosynthetic process	1.09655e-15	cin; RpL22; RpL36; CG14786; dor; sta; mRpL16; eIF2B-epsilon; mRpL14; CG8636; tko; eIF2B-beta; CG10802; tyf; GlcAT-I; mRpL33; mRpL30; RpL35; CG3011; CG5941; Spt6; RpL7A; schlank; RpL17; NA; Gclc; RpS6; CG2263; Sptr; e(r); CG1885; t; su(r); RpS28b; Aats-lys; l(1)G0230; ras; mRpL54; RpL29; CG10306; Ppcdc; mRpS29; RpS16; bonsai; blw; RpL23; RpS24; eIF2B-delta; mRpL43; l(2)efl; Galphas; Alas; eIF-5A; …
GO:0051650	2.67141e-16	4.55308	40.5889	85	124	establishment of vesicle localization	2.22596e-15	Vap-33A; rb; nonC; cm; Ppt1; AP-1gamma; Synj; or; gammaSnap1; Eps-15; nSyb; Rop; Syx17; sesB; Tomosyn; comt; shi; Chc; X11L; AP-1-2beta; Clc; alphaSnap; Sec3; Dab; Arl1; fwe; Gl; Syx13; Nrx-IV; Exo70; lqf; sfl; Syx16; Sec5; Snapin; Drp1; Rab5; l(2)gl; Csp; Arf79F; Sec8; Sec23; aux; Liprin-alpha; Stam; Syx5; BicD; Dap160; Arl2; Vps45; AP-1mu; gammaSnap2; Nsf2; twf; Gos28; EndoA; Synd; Sec15; AP-2s…
GO:0071496	2.6837e-16	4.3788	42.5529	88	130	cellular response to external stimulus	2.22596e-15	CkIIalpha; AMPKalpha; dor; Ns3; CG3071; Nmd3; CG3527; Atg5; l(1)G0020; CG7246; CG2972; Atg8a; CG4038; Fib; Dcp-1; eIF6; Snap29; Nxt1; Nop60B; zip; Atg2; Syx17; Ran; CkIIbeta; Rtc1; Atg101; car; pcm; HLH106; NA; Adgf-A; l(3)72Dn; CG12301; CG6878; NHP2; Atg1; Sod; SH3PX1; Atg18a; Atg17; CG9107; l(2)k09022; nop5; Rack1; CG13097; Bka; Tor; CG11975; Vps16A; ird1; RagA-B; Ras85D; Bruce; CG9799; foxo; G…
GO:0051648	2.69193e-16	4.43405	41.8982	87	128	vesicle localization	2.22596e-15	Vap-33A; rb; nonC; cm; Ppt1; AP-1gamma; Synj; or; gammaSnap1; Eps-15; nSyb; Rop; Syx17; sesB; Tomosyn; comt; shi; Chc; X11L; AP-1-2beta; Clc; alphaSnap; Sec3; Dab; Arl1; fwe; Gl; Syx13; Nrx-IV; Exo70; lqf; sfl; Syx16; Sec5; Snapin; Drp1; Rab5; l(2)gl; Csp; Arf79F; Sec8; Sec23; Pi4KIIalpha; aux; Liprin-alpha; Stam; Syx5; BicD; Dap160; Arl2; Vps45; AP-1mu; gammaSnap2; Nsf2; twf; PP2A-B'; Gos28; End…
GO:0048468	3.21321e-16	1.55607	543.367	690	1660	cell development	2.64156e-15	alpha-Cat; CkIIalpha; Appl; Roc1a; SkpA; sdk; CG5254; Rbf; CG13366; AMPKalpha; CG11448; DAAM; pck; rush; dor; mip130; Actn; usp; csw; crn; Vinc; sgg; Rala; lva; Femcoat; Fas2; ctp; Ptp4E; snf; spoon; Act5C; GAA1; sqh; wuho; Mcm6; Inx2; Atg5; ct; sn; mys; slpr; Cp36; Nrg; Ppt1; Moe; Dsor1; Yp2; flw; ras; Atg8a; Act57B; cpa; shg; sktl; mago; tud; Egfr; HmgD; GM130; babos; wdp; Vps20; blw; vir; Dcp-…
GO:0023051	4.69065e-16	1.8878	232.404	333	710	regulation of signaling	3.83386e-15	CkIIalpha; Roc1a; SkpA; AMPKalpha; dor; Rbcn-3B; CG14812; Pgd; pn; sgg; Rala; VhaAC39-1; Fas2; CHOp24; RhoGAP5A; MAPk-Ak2; CG3198; ct; slpr; Crag; Ppt1; e(r); Dsor1; CG34408; flw; cpa; mago; Sara; Egfr; Fkbp14; Swim; Vps20; asrij; Dcp-1; gbb; MAN1; CG3608; Nurf-38; Eps-15; E(bx); CG3402; CG32479; trio; Sac1; Rabex-5; Cdc37; alpha-Spec; msn; Atg2; Jafrac2; Strip; CG12082; CG14977; pav; ImpL2; Rpd3…
GO:0065004	5.75498e-16	5.90449	30.1143	68	92	protein-DNA complex assembly	4.67675e-15	Mcm3; Mcm6; NC2alpha; Nap1; E(bx); asf1; Mcm7; NC2beta; Mcm10; Mcm2; M1BP; Mcm5; NA; Caf1; Set; XNP; Acf1; Df31; mle; P32; Iswi; His1:CG33807; His1:CG33834; Chrac-14
GO:0034728	7.74394e-16	5.48212	32.0783	71	98	nucleosome organization	6.25711e-15	Nap1; Nurf-38; E(bx); Chrac-16; Mi-2; asf1; rept; Chd3; Gas41; NC2beta; pont; NA; Caf1; Set; MRG15; XNP; Nlp; Acf1; Df31; P32; Bap55; Iswi; MrgBP; His1:CG33807; His1:CG33834; Chrac-14; Nipped-A
GO:0044265	8.30205e-16	2.49644	105.073	174	321	cellular macromolecule catabolic process	6.66994e-15	SkpA; Edem1; wds; Zw10; sgg; CG4165; CG3016; Top3beta; Ubi-p5E; nonC; Upf2; Moe; Prosalpha3; Vps20; Not11; Upf3; DCP1; Pym; snama; CG3356; Rpn8; slik; CG30421; CG32479; CG9153; CG12082; ida; Rpt3; CG2247; Upf1; Usp7; CkIalpha; REG; shtd; CG8184; Prosalpha4; CG7288; Rcd-1; pcm; Rpn1; l(3)76BDr; Rpn12; Prosbeta6; Prosbeta2; Vps36; vih; Rpt4R; Pop2; Ube3a; Ufd1-like; Uch-L5; CG5087; pix; Cbl; Uba2; …
GO:0080134	9.75998e-16	2.87129	78.2318	138	239	regulation of response to stress	7.79695e-15	SkpA; sgg; CG32795; Rala; CG4078; MAPk-Ak2; slpr; Crag; flw; cpa; Egfr; Tim10; Dcp-1; Sesn; Nxt1; key; E(bx); Sac1; Rac1; HBS1; CG12082; PGRP-SA; ben; Rok; betaCOP; Hayan; Atg101; Ulp1; Cdc42; dome; Spn77Ba; HLH106; PDCD-5; brm; CG6878; Sod; GNBP3; GstO2; Atg18a; syd; Rac2; GlyP; cpb; ebi; Hr78; Csp; Rm62; CG2051; mtd; CG13994; chic; Spn27A; Mnn1; LanB1; Cka; Spn28Dc; emb; raw; Etl1; me31B; holn1…
GO:0006163	9.90404e-16	3.09749	68.0846	124	208	purine nucleotide metabolic process	7.82364e-15	CG32230; CG14786; CG3621; pn; l(1)G0334; CG3446; CG3192; CG18624; ND75; Hex-A; l(1)G0230; ras; CG10320; Ppcdc; blw; levy; Galphas; NDUFA8; mtacp1; sesB; CG32649; ade5; nmdyn-D6; CG5548; Gapdh2; CG9172; CG3560; CG5703; Pfrx; CG7580; CG4169; ms(3)72Dt; Adk1; l(3)neo18; CG11811; CG6463; ATPsyn-b; Prat2; ImpL3; Ppat-Dpck; CG4769; Pdsw; CG12400; Pgk; CG3214; AIF; Eno; RFeSP; CG2789; CG11455; fbl; CG60…
GO:0009259	9.90404e-16	3.09749	68.0846	124	208	ribonucleotide metabolic process	7.82364e-15	CG32230; CG14786; CG3621; pn; l(1)G0334; CG3446; CG3192; CG18624; ND75; Hex-A; l(1)G0230; ras; CG10320; Ppcdc; blw; levy; Galphas; NDUFA8; mtacp1; sesB; CG32649; ade5; nmdyn-D6; CG5548; Gapdh2; CG9172; CG3560; CG5703; Pfrx; CG7580; CG4169; ms(3)72Dt; Adk1; l(3)neo18; CG6463; ATPsyn-b; Prat2; ImpL3; Ppat-Dpck; CG4769; Pdsw; CG12400; Pgk; CG3214; AIF; Eno; RFeSP; CG2789; CG11455; fbl; CG6020; CG582…
GO:0048519	1.2391e-15	1.63253	404.252	531	1235	negative regulation of biological process	9.73379e-15	CkIIalpha; elav; Appl; Roc1a; SkpA; sdk; Rbf; AMPKalpha; dor; mip130; east; usp; CG14812; csw; pn; msta; wds; Zw10; sgg; Rala; CG2982; mei-9; Fas2; Cbp80; rb; Mcm3; spoon; schlank; ct; NELF-B; mys; fs(1)h; Hexo2; HP1b; Dsor1; flw; cpa; mago; Egfr; NC2alpha; Tim10; Rae1; Vps20; Nup214; eIF2B-delta; CG13551; Dcp-1; Sesn; pita; MAN1; Not11; DCP1; Snap29; Nxt1; spag; key; Eps-15; Pdk1; fwd; Tudor-SN;…
GO:0007005	1.49226e-15	3.72733	50.0815	98	153	mitochondrion organization	1.16578e-14	CG14786; Pgam5; pn; ttm50; Marf; Tom40; mRpL54; Tim10; Sesn; Letm1; Aats-tyr-m; mRpL46; Hsp60; Tim8; mRpL49; Tim9a; CG9172; CG7772; Tim9b; HLH106; Tom20; CG8004; mRpL21; CG7603; CG6878; CG7394; Sod; mRpL12; mRpL36; CG7506; mRpL50; Surf1; sfl; mRpL27; Thor; Drp1; mRpL48; Gs1; mTerf3; P5CDh1; mRpL44; Ubc6; mRpL28; Hsp60C; CG7382; ico; Dref; CG4908; porin; dmGlut; Tom70; mRpS23; mTTF; bsf; ref(2)P; …
GO:0006399	1.78939e-15	6.45363	26.841	62	82	tRNA metabolic process	1.38262e-14	CG4045; CG10802; Nsun2; CG2263; Aats-lys; CG4610; Fib; CG30185; Aats-tyr-m; Aats-pro; CG32281; Aats-leu; CG1434; CG8097; Aats-arg; Aats-his; CG7441; Aats-tyr; CG4573; Aats-gly; mRpL39; CG5660; Aats-ala-m; CG33123; CG17259; Rpp30; Aats-ile; CG9596; CG13090; Aats-ala; Aats-thr; CG6388; l(2)35Bc; CG31739; Aats-asn; CG9987; CG10463; CG10092; Aats-trp; Aats-met; Aats-ser; CG5220; Aats-glupro; CG5463; …
GO:0022904	1.78939e-15	6.45363	26.841	62	82	respiratory electron transport chain	1.38262e-14	CG32230; CG3621; CG3446; CG3192; CG18624; ND75; CG10320; levy; NDUFA8; mtacp1; Rpd3; CG32649; CG5548; HDAC6; CG9172; CG3560; CG5703; CG7580; CG4169; l(3)neo18; CG6463; CG4769; Pdsw; CG12400; CG3214; AIF; RFeSP; CG11455; CG6020; cype; Gpdh; CG9140; CoVb; CG9306; l(2)35Di; CoIV; CG9603; SdhC; CoVa; CG3731; ND23; NP15.6; ND42; CG2014; CG7598; dj-1beta; SdhB; CG14482; Gpo-1; CG12859; ox; CG7712; CG12…
GO:0072521	1.91225e-15	2.91758	74.3039	132	227	purine-containing compound metabolic process	1.46952e-14	CG32230; CG14786; CG3621; pn; l(1)G0334; CG3446; CG3192; CG18624; ND75; Hex-A; l(1)G0230; ras; CG10320; Ppcdc; blw; levy; Galphas; cN-IIIB; NDUFA8; mtacp1; sesB; CG32649; ade5; nmdyn-D6; CG5548; Gapdh2; CG9172; CG3560; CG5703; Pfrx; Adgf-A; CG7580; CG4169; ms(3)72Dt; Adk1; l(3)neo18; CG11811; CG6463; ATPsyn-b; Prat2; ImpL3; Ppat-Dpck; CG4769; Pdsw; CG12400; Pgk; CG3214; AIF; Eno; RFeSP; CG2789; C…
GO:0006119	2.07948e-15	6.24626	27.4957	63	84	oxidative phosphorylation	1.5894e-14	CG32230; CG14786; CG3621; CG3446; CG3192; CG18624; ND75; CG10320; levy; NDUFA8; mtacp1; CG32649; CG5548; CG9172; CG3560; CG5703; CG7580; CG4169; l(3)neo18; CG6463; CG4769; Pdsw; CG12400; CG3214; AIF; RFeSP; CG2789; CG11455; CG6020; cype; CG9140; CoVb; CG9306; l(2)35Di; Cyt-c-p; bsf; CoIV; CG9603; SdhC; CoVa; CG3731; ND23; ND42; CG2014; CG7598; CG7834; dj-1beta; SdhB; CG14482; CG12859; ox; wal; CG…
GO:0006913	2.50578e-15	4.57909	37.6429	79	115	nucleocytoplasmic transport	1.89474e-14	sta; Ns3; Nmd3; sgg; Torsin; CG16892; RpS28b; Act57B; mago; CG10320; Nup214; thoc5; Nxt1; thoc7; pav; sbr; hop; Ran; Nup93-1; exd; Stim; Ranbp16; U2af50; Nup153; fu; Nup205; Kap-alpha1; thoc6; msk; Trn; Rcc1; Ntf-2; Trn-SR; tho2; lwr; Hpr1; noi; Karybeta3; Hel25E; smt3; CG7214; emb; Nup107; Nup160; cact; Cas; swm; Fs(2)Ket; Kap-alpha3; Ras85D; Su(fu); mbo; sqd; Akt1; Nup58; Nup133; Sec13; Nup98-9…
GO:0051169	2.50578e-15	4.57909	37.6429	79	115	nuclear transport	1.89474e-14	sta; Ns3; Nmd3; sgg; Torsin; CG16892; RpS28b; Act57B; mago; CG10320; Nup214; thoc5; Nxt1; thoc7; pav; sbr; hop; Ran; Nup93-1; exd; Stim; Ranbp16; U2af50; Nup153; fu; Nup205; Kap-alpha1; thoc6; msk; Trn; Rcc1; Ntf-2; Trn-SR; tho2; lwr; Hpr1; noi; Karybeta3; Hel25E; smt3; CG7214; emb; Nup107; Nup160; cact; Cas; swm; Fs(2)Ket; Kap-alpha3; Ras85D; Su(fu); mbo; sqd; Akt1; Nup58; Nup133; Sec13; Nup98-9…
GO:0048489	2.53486e-15	4.44907	38.9522	81	119	synaptic vesicle transport	1.89645e-14	Vap-33A; rb; nonC; cm; Ppt1; AP-1gamma; Synj; or; gammaSnap1; Eps-15; nSyb; Rop; Syx17; sesB; Tomosyn; comt; shi; Chc; X11L; AP-1-2beta; Clc; alphaSnap; Sec3; Dab; Arl1; fwe; Gl; Syx13; Nrx-IV; Exo70; lqf; sfl; Syx16; Sec5; Snapin; Drp1; Rab5; l(2)gl; Csp; Arf79F; Sec8; aux; Liprin-alpha; Stam; Syx5; BicD; Dap160; Arl2; Vps45; AP-1mu; gammaSnap2; Nsf2; twf; EndoA; Synd; Sec15; AP-2sigma; CASK; AP…
GO:0097480	2.53486e-15	4.44907	38.9522	81	119	establishment of synaptic vesicle localization	1.89645e-14	Vap-33A; rb; nonC; cm; Ppt1; AP-1gamma; Synj; or; gammaSnap1; Eps-15; nSyb; Rop; Syx17; sesB; Tomosyn; comt; shi; Chc; X11L; AP-1-2beta; Clc; alphaSnap; Sec3; Dab; Arl1; fwe; Gl; Syx13; Nrx-IV; Exo70; lqf; sfl; Syx16; Sec5; Snapin; Drp1; Rab5; l(2)gl; Csp; Arf79F; Sec8; aux; Liprin-alpha; Stam; Syx5; BicD; Dap160; Arl2; Vps45; AP-1mu; gammaSnap2; Nsf2; twf; EndoA; Synd; Sec15; AP-2sigma; CASK; AP…
GO:0022900	2.68709e-15	5.88568	28.805	65	88	electron transport chain	1.99976e-14	CG32230; CG3621; CG3446; CG3192; CG18624; ND75; CG10320; blw; levy; NDUFA8; mtacp1; Rpd3; CG32649; CG5548; HDAC6; CG9172; CG3560; CG5703; CG12203; CG7580; CG4169; l(3)neo18; CG6463; CG4769; Pdsw; CG12400; CG3214; AIF; RFeSP; CG11455; CG6020; cype; Gpdh; CG9140; CoVb; CG9306; l(2)35Di; CoIV; CG9603; SdhC; CoVa; CG3731; ND23; NP15.6; ND42; CG2014; CG7598; dj-1beta; SdhB; SdhA; CG14482; Gpo-1; CG128…
GO:0043254	2.92952e-15	8.01963	22.2584	54	68	regulation of protein complex assembly	2.16877e-14	DAAM; dor; spoon; cpa; NC2alpha; CG12082; Rbp1-like; Arpc3B; car; Cdc42; flr; Arp3; mad2; Arpc5; CG7261; cpb; Sec23; Gel; Arpc4; x16; Btk29A; Srp54; Rsf1; SCAR; Arpc1; NC2beta; CG5869; Arpc2; dia; Vps16A; Rbp1; TfIIFbeta; sals; B52; twf; Atx2; gish; Vps39; RhoGAP92B; Sar1; Vps33B; spz; Apc; WASp; Vps16B; ncd; LamC; wash; SC35; lt; Sec16; Arpc3A; msps; nwk
GO:0071103	3.67831e-15	3.81163	47.1355	93	144	DNA conformation change	2.70892e-14	SkpA; Top3beta; HP1b; Nap1; E(bx); dre4; RfC4; Bap60; Top1; asf1; Trl; eIF-4E; Rcc1; Ddx1; eIF-4a; Su(var)205; aurB; glu; Top2; barr; Mcm10; Mcm2; Mcm5; Blm; Pp1-87B; NA; Caf1; Set; XNP; Cap-D2; Nlp; Acf1; Df31; mle; prod; Dp1; P32; SMC2; Su(var)2-HP2; Iswi; Su(var)2-10; Incenp; larp; scf; His1:CG33807; His1:CG33834; Chrac-14; CG9791; Psf2
GO:0009150	3.75809e-15	3.05702	66.7753	121	204	purine ribonucleotide metabolic process	2.75334e-14	CG32230; CG14786; CG3621; pn; l(1)G0334; CG3446; CG3192; CG18624; ND75; Hex-A; l(1)G0230; ras; CG10320; Ppcdc; blw; levy; Galphas; NDUFA8; mtacp1; sesB; CG32649; ade5; nmdyn-D6; CG5548; Gapdh2; CG9172; CG3560; CG5703; Pfrx; CG7580; CG4169; ms(3)72Dt; Adk1; l(3)neo18; CG6463; ATPsyn-b; Prat2; ImpL3; Ppat-Dpck; CG4769; Pdsw; CG12400; Pgk; CG3214; AIF; Eno; RFeSP; CG2789; CG11455; fbl; CG6020; CG582…
GO:0006909	3.86815e-15	2.90282	73.3219	130	224	phagocytosis	2.81936e-14	Rab35; Sec22; TRAM; AMPKalpha; CG3638; deltaCOP; csw; Vinc; Act5C; CG10778; CG17754; l(1)G0232; ras; cpa; blw; Lpt; Chi; Rac1; alphaCOP; Pxn; Ubi-p63E; prtp; CkIalpha; comt; CG5599; par-6; betaCOP; Cdc42; gig; polo; alphaSnap; CG7365; HLH106; Int6; zetaCOP; Zn72D; brm; CG7275; flr; Pi3K68D; CG11652; l(3)01239; ATPsyn-b; SH3PX1; Arp3; Hn; Rac2; Trn; Bre1; Membrin; Arpc5; colt; Slh; CG4552; crq; Gs…
GO:0006413	4.0077e-15	8.83197	20.6218	51	63	translational initiation	2.90609e-14	eIF2B-epsilon; CG8636; eIF2B-beta; CG5941; CG10306; eIF2B-delta; l(2)efl; eIF-5A; eIF6; CG17737; eIF5B; mRpL49; eIF5; Rbp2; eIF-2alpha; CG9099; Int6; AGO2; eIF-2beta; CG5642; eIF-4E; Hsp67Bc; pix; mxt; Thor; Ddx1; CG9769; eIF3-S10; eIF-3p40; Trip1; eIF-4a; Rack1; eIF4AIII; Irp-1B; eIF-1A; Irp-1A; 4EHP; CG12413; ligatin; eIF2B-alpha; RpS18; eIF3-S8; eIF3-S9; clu; eIF2B-gamma; CG13163; Adam; eIF4G;…
GO:0008219	4.71572e-15	2.37127	111.947	181	342	cell death	3.40205e-14	Appl; SkpA; CG5254; Rbf; CG14812; csw; ctp; Cdk7; Atg5; sws; Atg8a; sktl; Egfr; mRpS29; Dcp-1; eIF-5A; snama; spag; CG3829; zip; emp; Pdk1; mri; Atg2; Jafrac2; CG12082; Eip63F-1; Ubi-p63E; CG14995; v; CG4332; CtsB1; ben; CG7860; shi; Chc; Cyp1; Tao; rept; ftz-f1; PDCD-5; fwe; Eip71CD; AGO2; Vps36; SRm160; Atg1; viaf; Dronc; eIF-4E; pix; Cbl; RpL14; msk; Atg18a; MED24; velo; vito; Sep1; morgue; AI…
GO:0044282	4.82016e-15	6.14558	27.1684	62	83	small molecule catabolic process	3.45975e-14	CG9577; arg; CG3699; Spat; CG4586; Acox57D-p; Acox57D-d; Thiolase; Dat; CG3376; CG9149; SCOT; Gad1; v; pdgy; CG7860; Mfe2; CG7430; Pgm; CG17029; CG17027; CG8745; CG10361; CG6638; CG12262; Hn; ppl; CG9391; CG9547; Mtpalpha; yip2; CG6415; hgo; CG17544; CG9319; CG8665; CG1041; GstZ2; GstZ1; CG3999; CG4860; Ipp; CG4390; Plip; Ssadh; CG12428; CG3267; CG11208; CG6543; Egm; dare; Etf-QO; Gdh; CG5009; Sa…
GO:0097479	5.25682e-15	4.27884	39.9342	82	122	synaptic vesicle localization	3.75412e-14	Vap-33A; rb; nonC; cm; Ppt1; AP-1gamma; Synj; or; gammaSnap1; Eps-15; nSyb; Rop; Syx17; sesB; Tomosyn; comt; shi; Chc; X11L; AP-1-2beta; Clc; alphaSnap; Sec3; Dab; Arl1; fwe; Gl; Syx13; Nrx-IV; Exo70; lqf; sfl; Syx16; Sec5; Snapin; Drp1; Rab5; l(2)gl; Csp; Arf79F; Sec8; aux; Liprin-alpha; Stam; Syx5; BicD; Dap160; Arl2; Vps45; AP-1mu; gammaSnap2; Nsf2; twf; PP2A-B'; EndoA; Synd; Sec15; AP-2sigma;…
GO:0032879	6.3842e-15	2.3937	108.346	176	331	regulation of localization	4.53631e-14	dor; east; deltaCOP; sgg; CHOp24; rb; GAA1; mys; Crag; Ppt1; Moe; Act57B; mago; Nup214; gbb; Snap29; CG3608; slik; Rac1; alphaCOP; pav; ImpL2; Rop; CG1657; dsh; Ran; Gtp-bp; prtp; p24-1; Lsd-2; opm; vap; Stim; Chc; U2af50; Fur2; betaCOP; fu; car; Tao; Mi-2; Indy; Vps60; Lasp; zetaCOP; ms(3)72Dt; Arl1; blue; RhoGAP68F; CdsA; Rac2; Galphai; ple; Trn; LanA; Rcc1; Elp3; Sec5; Rab5; Sec24CD; Su(dx); c…
GO:0040007	8.07239e-15	2.14517	142.388	219	435	growth	5.70718e-14	SkpA; RpL22; AMPKalpha; DAAM; Ns3; usp; sgg; Fas2; CG3527; sqh; mys; slpr; Nrg; Hexo2; Rbm13; Dsor1; CG7246; Neb-cGP; shg; mahj; Rae1; bonsai; blw; Sesn; gbb; HSPC300; spag; CG3608; Eps-15; Pdk1; trio; Rabex-5; cue; pUf68; Rac1; Strip; Eip63E; CG11583; Src64B; sesB; dsh; dlg1; bif; lic; ben; shi; CG8939; vap; Chc; caz; sl; Rok; Cdc42; Tao; Alr; gig; alphaSnap; Rab8; trc; NA; fz2; Capr; TSG101; To…
GO:0016265	8.54205e-15	2.3405	113.256	182	346	death	6.00918e-14	Appl; SkpA; CG5254; Rbf; CG14812; csw; ctp; Cdk7; Atg5; sws; Atg8a; sktl; Egfr; mRpS29; Dcp-1; eIF-5A; snama; spag; CG3829; zip; emp; Pdk1; mri; Atg2; Jafrac2; CG12082; Eip63F-1; Ubi-p63E; CG14995; v; CG4332; CtsB1; ben; CG7860; shi; Chc; Cyp1; Tao; gig; rept; ftz-f1; PDCD-5; fwe; Eip71CD; AGO2; Vps36; SRm160; Atg1; viaf; Dronc; eIF-4E; pix; Cbl; RpL14; msk; Atg18a; MED24; velo; vito; Sep1; morgu…
GO:0051188	1.80828e-14	9.06244	19.3125	48	59	cofactor biosynthetic process	1.26579e-13	cin; COQ7; Sptr; Ppcdc; Alas; CG3803; CG12016; CG1749; CG2543; CG2453; CG9940; pdgy; CG32174; Ppat-Dpck; mal; CG3714; fbl; CG9804; CG5828; CG7277; Coprox; CG5261; CG13090; CG9249; Dpck; sgll; CG2846; Nmdmc; CG8199; pug; CG14721; Ppcs; CG6178; Ppox; Nmnat; Mocs2; CG11876; Pcd; FeCH; Updo; CG30493; pr; Sam-S; Pdxk; CG17691; Las; ATPCL; CG42503
GO:0006323	1.87504e-14	3.90333	43.2075	86	132	DNA packaging	1.30607e-13	SkpA; HP1b; Nap1; E(bx); RfC4; Bap60; Top1; asf1; Trl; eIF-4E; Rcc1; Su(var)205; aurB; glu; Top2; barr; Mcm10; Mcm2; Mcm5; Pp1-87B; NA; Caf1; Set; XNP; Cap-D2; Nlp; Acf1; Df31; mle; prod; Dp1; P32; SMC2; Su(var)2-HP2; Iswi; Su(var)2-10; Incenp; larp; His1:CG33807; His1:CG33834; Chrac-14; Psf2
GO:0033043	2.21214e-14	2.48055	95.5803	158	292	regulation of organelle organization	1.53332e-13	SkpA; CG14786; DAAM; dor; Ocrl; Pgam5; pn; Zw10; sgg; spoon; sqh; Marf; mys; Moe; HP1b; cpa; Lpt; DCP1; Ssrp; gek; slik; fwd; Klp61F; alpha-Spec; dre4; ida; pav; Rpd3; Src64B; dsh; Bap60; shi; Rok; if; Arpc3B; beta-Spec; car; Cdc42; pcm; HLH106; Prp3; Mi-2; CG7603; CG6878; Trl; endos; flr; vih; RhoGAP68F; Sod; JIL-1; bol; Arp3; msl-3; Ubp64E; mad2; ed; Sec5; Thor; Arpc5; Drp1; CG7261; mio; cpb; e…
GO:0006457	2.30652e-14	4.68905	34.0423	72	104	protein folding	1.59094e-13	CG2918; NA; Torsin; CG7033; Fkbp14; CG2852; CG3511; Cypl; Hsp83; Ero1L; Hsp60; CG1847; Tcp-1zeta; Cyp1; CG7770; CG7945; Pdi; Hsc70-1; CG11267; CG10907; l(3)01239; CG8336; Hsp27; DnaJ-1; CG10635; CG31961; CG7261; mio; CG5001; CG4164; Hop; CG10565; Csp; Hsp60C; CG13993; FKBP59; CG5525; UK114; Tpr2; unc-45; Tcp-1eta; Crc; mgr; CG14715; CG12279; Droj2; Hsc70-4; FK506-bp1; Cctgamma; CG4538; CG7048; T-…
GO:0042594	2.49086e-14	3.19905	57.9374	107	177	response to starvation	1.70974e-13	CkIIalpha; Rbf; AMPKalpha; dor; Ns3; usp; CG3071; Nmd3; CG3527; Atg5; l(1)G0020; CG7246; CG2972; Atg8a; CG4038; Fib; Dcp-1; eIF6; Snap29; Nxt1; Nop60B; Atg2; Syx17; Ran; CkIIbeta; Jafrac1; Rtc1; Atg101; car; pcm; HLH106; NA; Adgf-A; l(3)72Dn; CG12301; CG6878; NHP2; Atg1; Sod; SH3PX1; Hsp27; Atg18a; Thor; Itp-r83A; Rheb; Atg17; CG9107; l(2)k09022; nop5; Rack1; CG13097; Mtpalpha; Bka; Tor; p38b; CG…
GO:0030029	2.99349e-14	2.612	84.4511	143	258	actin filament-based process	2.04483e-13	CG13366; DAAM; Ocrl; Actn; cib; ctp; spoon; sqh; sn; mys; Moe; cpa; sktl; Dcp-1; tsr; gek; slik; zip; trio; Rac1; Girdin; Hsp83; pav; Src64B; dyl; dsh; hop; Ran; mew; Gbeta13F; shi; Rok; if; Arpc3B; Vav; Cdc42; parvin; polo; Lasp; Smn; flr; RhoGAP68F; Pi3K68D; Prm; Arp3; pbl; lark; Rac2; Galphai; fliI; ed; Arpc5; cpb; l(2)gl; siz; Hem; Gel; Arpc4; mtm; chic; mts; Btk29A; Pvr; SCAR; Ced-12; Arpc1;…
GO:0030036	3.01517e-14	2.6932	79.2138	136	242	actin cytoskeleton organization	2.04974e-13	CG13366; DAAM; Ocrl; Actn; cib; ctp; spoon; sqh; sn; mys; Moe; cpa; sktl; Dcp-1; tsr; gek; slik; zip; trio; Rac1; Girdin; Hsp83; pav; Src64B; dyl; dsh; Ran; mew; Gbeta13F; shi; Rok; if; Arpc3B; Vav; Cdc42; parvin; polo; Lasp; Smn; flr; RhoGAP68F; Pi3K68D; Prm; Arp3; pbl; lark; Rac2; Galphai; fliI; ed; Arpc5; cpb; l(2)gl; siz; Hem; Gel; Arpc4; mtm; chic; mts; Btk29A; Pvr; SCAR; Ced-12; Arpc1; ck; …
GO:0012501	4.05407e-14	2.39502	101.472	165	310	programmed cell death	2.7428e-13	SkpA; CG5254; Rbf; CG14812; csw; ctp; Cdk7; Atg5; sws; Atg8a; sktl; Egfr; mRpS29; Dcp-1; eIF-5A; snama; spag; CG3829; zip; emp; Pdk1; mri; Atg2; Jafrac2; CG12082; Eip63F-1; Ubi-p63E; CG14995; CG4332; CtsB1; CG7860; shi; Chc; Cyp1; Tao; rept; ftz-f1; PDCD-5; fwe; Eip71CD; AGO2; Vps36; SRm160; Atg1; viaf; Dronc; eIF-4E; pix; RpL14; msk; Atg18a; MED24; vito; Sep1; morgue; AIF; ebi; CG2789; crq; l(2)…
GO:0030258	4.26239e-14	7.56844	21.2764	51	65	lipid modification	2.87001e-13	CG9577; CG3699; Ocrl; CG4586; Acox57D-p; Acox57D-d; Synj; Thiolase; fwd; Sac1; CG9149; CG15743; CG14411; Mfe2; CG9784; nes; CG17029; CG17027; Pi3K68D; CG6707; CG12262; CG9391; Pi4KIIalpha; frj; Mtpalpha; yip2; CG17544; CG9319; CG1041; CG4860; Ipp; Pi3K92E; AdipoR; CG12428; CG14512; CG7789; CG11208; CG6805; CG6543; Egm; Etf-QO; CG5009; Pten; CG9527; PIP4K; CG32699; CG14688; 5PtaseI; CG8112; PI4KII…
GO:0051130	4.36167e-14	3.0454	61.8653	112	189	positive regulation of cellular component organization	2.92294e-13	DAAM; Pgam5; pn; sgg; lva; Marf; Top3beta; Crag; Ppt1; Moe; GM130; gbb; Lpt; eIF-5A; HSPC300; trio; Rac1; ida; dsh; dlg1; prtp; Bap60; Chc; caz; Rok; Arpc3B; par-6; Cdc42; Tao; Vps60; Lasp; Trl; Abp1; flr; vih; RhoGAP68F; simj; bol; Arp3; Sec5; Arpc5; Drp1; Sec24CD; cpb; ebi; mTerf3; Arf79F; Sec23; kra; Gel; Arpc4; chic; Su(var)205; Cks30A; numb; SCAR; Arpc1; CaBP1; CG5869; BicD; Arpc2; Cdc23; di…
GO:0006974	4.81579e-14	2.44348	96.2349	158	294	cellular response to DNA damage stimulus	3.21204e-13	CG9578; SkpA; Rbf; wds; mei-9; Mcm3; XRCC1; CG4078; Gclc; Trxr-1; Dsor1; CycB; DNA-ligI; CG4049; Pdk1; E(bx); Rac1; CG12018; CG8993; Jafrac2; Rcd5; RfC4; Rpt3; RPA3; RpII215; Chrac-16; CkIalpha; CG12096; Jafrac1; Prosalpha4; SMC3; gig; rept; CG6812; CSN1b; DNApol-delta; Prosbeta2; RecQ5; Rpt4R; Pop2; Pi3K68D; CG3448; Mcm7; MED4; Txl; Rpt6; gkt; Rrp1; mio; lwr; CSN3; Rpn10; Rpb8; RpLP0; DNApol-eta…
GO:0040008	4.85161e-14	2.46903	93.9436	155	287	regulation of growth	3.22074e-13	SkpA; RpL22; AMPKalpha; Ns3; usp; sgg; Fas2; CG3527; Hexo2; Rbm13; Dsor1; CG7246; Neb-cGP; shg; mahj; Rae1; bonsai; Sesn; gbb; HSPC300; CG3608; Eps-15; Pdk1; trio; Rabex-5; pUf68; Rac1; alpha-Spec; CG11583; Src64B; dsh; dlg1; bif; lic; shi; CG8939; vap; Chc; caz; sl; Rok; beta-Spec; Cdc42; Tao; gig; Rab8; trc; NA; Capr; TSG101; dlp; mop; Abp1; Atg1; RhoGAP68F; simj; path; eIF-4E; dally; Arp3; sfl…
GO:0044707	6.06944e-14	1.35588	1252.36	1433	3826	single-multicellular organism process	4.01037e-13	CkIIalpha; cin; elav; CG18273; Appl; Roc1a; SkpA; sdk; RpL22; CG13366; AMPKalpha; CG11448; DAAM; CG3638; pck; rush; inc; dor; Ns3; Actn; usp; Edem1; deltaCOP; csw; pn; crn; kz; Vinc; Nmd3; wds; Zw10; tko; sgg; Rala; CG2875; Vap-33A; lva; cib; Fas2; Nsun2; CHOp24; CG3527; Cbp80; Torsin; rb; ctp; Ptp4E; snf; Sas10; Rnp4F; Mcm3; RhoGAP5A; spoon; Act5C; CG3011; GAA1; CG5966; sqh; Marf; Top3beta; Ctr1…
GO:0002376	1.15791e-13	2.09234	138.788	211	424	immune system process	7.61528e-13	sgg; CG32795; Rala; CG16756; Spt6; sn; mys; RpS6; Nrg; Crag; Dsor1; shg; Egfr; Tim10; Swim; asrij; l(2)06496; Nxt1; Zfrp8; Nurf-38; key; E(bx); Gale; Rac1; HBS1; R; ecd; Vago; hop; PGRP-SA; lic; Flo2; if; betaCOP; Hayan; Vav; Ulp1; Cdc42; dome; Spn77Ba; fz2; Mkp3; Cat; CG4306; Adgf-A; PGRP-SB1; PDCD-5; brm; AGO2; Tollo; Aats-gly; mop; Gl; ptip; Nplp2; Dronc; Shc; GNBP3; GstO2; Atg18a; Uba2; Rac2;…
GO:0005975	1.31403e-13	2.38814	97.8716	159	299	carbohydrate metabolic process	8.60205e-13	CG14476; CG3038; CG13369; l(1)G0334; kdn; Hexo2; Ost48; Hex-A; Idgf4; Treh; Tal; Gyk; Gale; Cht2; oxt; pgant6; CG1271; Cht7; Hexo1; CG11594; CG17333; FucT6; Gapdh2; GalNAc-T2; Pfrx; Zw; CG7328; serp; Ugt; NUCB1; Adgf-A; Pgm; CG17029; CG17027; Arl1; Tollo; CG6650; Atg1; CG10688; nst; GNBP3; Galk; Cbl; sgl; sfl; ImpL3; CG10467; CG1518; Cda4; Tps1; Pgk; GlyP; Eno; CG9391; Arf79F; Rheb; CG12582; CG37…
GO:0044255	1.79161e-13	2.49572	87.397	145	267	cellular lipid metabolic process	1.16744e-12	CG9577; CG3699; Ocrl; CG4406; Vap-33A; GAA1; CG3160; schlank; CG4586; sws; CG10932; CG11190; sktl; Acox57D-p; Acox57D-d; Synj; Thiolase; CG3376; fwd; Sac1; CG9149; mtacp1; Cct1; CG12006; CG42237; CG15743; rdgB; CG14411; pdgy; Pis; CG8239; Mfe2; eas; sl; CG9914; CG9784; scu; CG6891; HLH106; nes; beg; Baldspot; CG17029; CG17027; Pex3; CG14130; Pi3K68D; GlcAT-P; CG6707; CdsA; cert; CG12262; qm; Dd; …
GO:0042775	2.13052e-13	6.2345	23.5677	54	72	mitochondrial ATP synthesis coupled electron transport	1.38191e-12	CG32230; CG3621; CG3446; CG3192; CG18624; CG10320; levy; NDUFA8; mtacp1; CG32649; CG5548; CG9172; CG3560; CG5703; CG7580; CG4169; l(3)neo18; CG6463; CG4769; Pdsw; CG12400; CG3214; AIF; RFeSP; CG11455; CG6020; cype; CG9140; CoVb; CG9306; l(2)35Di; CoIV; CG9603; SdhC; CoVa; CG3731; ND23; ND42; CG2014; CG7598; dj-1beta; SdhB; CG14482; CG12859; ox; CG7712; CG12895; CG1970; mt:CoI; mt:CoII; mt:ND4; mt…
GO:0016070	2.2094e-13	1.50838	500.16	627	1528	RNA metabolic process	1.42653e-12	CkIIalpha; elav; l(1)1Bi; Rbf; CG14786; CG11418; sta; MED18; mip130; CG4045; usp; csw; CG3071; crn; sgg; CG2685; CG10802; CG2982; Nsun2; CG3527; Cbp80; snf; Rnp4F; Cdk7; CG4119; IntS6; Spt6; wuho; schlank; nonC; CG3198; ct; NELF-B; Upf2; fs(1)h; RpS6; CG2263; e(r); HP1b; dalao; c12.1; Zpr1; Bx42; CG7246; Aats-lys; CG2990; CG2972; CG9344; CG9346; mago; LSm1; CG4266; CG4038; NC2alpha; CG4610; qkr58…
GO:0006790	2.23871e-13	4.4903	33.0603	69	101	sulfur compound metabolic process	1.43888e-12	GlcAT-I; Gclc; GstE12; oxt; CG32281; v; Tango13; CG11134; pdgy; CG8239; scu; Ggt-1; CG7280; CG4306; CG7430; Eip71CD; GstO3; GstO1; GstO2; sgl; sfl; Cbs; GstT3; CG12173; CG9804; CG5261; CG12264; GstZ2; GstZ1; CG8199; Mical; CG14721; GstD4; GstD5; GstD1; GstD9; GstD10; Sulf1; Gclm; CG6178; beta4GalT7; CG11876; CG7920; CG11334; CG3267; botv; GstE1; GstE3; GstE6; GstE7; GstE9; GstE11; Eip55E; GstE10;…
GO:0042773	2.7328e-13	5.82037	24.8771	56	76	ATP synthesis coupled electron transport	1.7485e-12	CG32230; CG3621; CG3446; CG3192; CG18624; ND75; CG10320; levy; NDUFA8; mtacp1; CG32649; CG5548; CG9172; CG3560; CG5703; CG7580; CG4169; l(3)neo18; CG6463; CG4769; Pdsw; CG12400; CG3214; AIF; RFeSP; CG11455; CG6020; cype; CG9140; CoVb; CG9306; l(2)35Di; CoIV; CG9603; SdhC; CoVa; CG3731; ND23; ND42; CG2014; CG7598; dj-1beta; SdhB; CG14482; CG12859; ox; CG7712; CG12895; CG1970; mt:CoI; mt:CoII; mt:N…
GO:0023052	2.84293e-13	1.47623	564.316	697	1724	signaling	1.81077e-12	Rab35; CkIIalpha; Roc1a; SkpA; Rbf; AMPKalpha; dor; Rbcn-3B; usp; Edem1; CG14812; csw; Pgd; pn; sgg; Rala; VhaAC39-1; Vap-33A; Fas2; CHOp24; XRCC1; RhoGAP5A; CG16721; MAPk-Ak2; CG32758; Rab18; Mipp2; schlank; Mcm6; nonC; CG3198; cm; ogre; CG32732; ct; Rab39; UbcE2H; Upf2; slpr; Nrg; CG12065; Crag; Ppt1; e(r); Arfrp1; AP-1gamma; Dsor1; Lst8; CG34408; flw; Psf3; cpa; mago; Sara; Egfr; Fkbp14; Synj;…
GO:0071824	3.03987e-13	3.71805	41.8982	82	128	protein-DNA complex subunit organization	1.92752e-12	Mcm3; Mcm6; NC2alpha; Nap1; Nurf-38; E(bx); Chrac-16; Mi-2; asf1; rept; Chd3; Mcm7; Ssl1; Gas41; NC2beta; Mcm10; Mcm2; M1BP; pont; Mcm5; NA; Caf1; Set; MRG15; XNP; Nlp; Acf1; Df31; mle; P32; Bap55; Tfb1; Iswi; MrgBP; His1:CG33807; His1:CG33834; Chrac-14; Nipped-A
GO:0044700	3.17877e-13	1.47531	563.662	696	1722	single organism signaling	2.0066e-12	Rab35; CkIIalpha; Roc1a; SkpA; Rbf; AMPKalpha; dor; Rbcn-3B; usp; Edem1; CG14812; csw; Pgd; pn; sgg; Rala; VhaAC39-1; Vap-33A; Fas2; CHOp24; XRCC1; RhoGAP5A; CG16721; MAPk-Ak2; CG32758; Rab18; Mipp2; schlank; Mcm6; nonC; CG3198; cm; ogre; CG32732; ct; Rab39; UbcE2H; Upf2; slpr; Nrg; CG12065; Crag; Ppt1; e(r); Arfrp1; AP-1gamma; Dsor1; Lst8; CG34408; flw; Psf3; cpa; mago; Sara; Egfr; Fkbp14; Synj;…
GO:0009108	3.62124e-13	9.67966	16.6938	42	51	coenzyme biosynthetic process	2.27575e-12	cin; COQ7; Sptr; Ppcdc; CG12016; CG1749; CG2543; CG2453; CG9940; pdgy; CG32174; Ppat-Dpck; mal; CG3714; fbl; CG9804; CG5828; CG7277; CG5261; CG13090; CG9249; Dpck; sgll; CG2846; Nmdmc; CG8199; pug; CG14721; Ppcs; CG6178; Nmnat; Mocs2; CG11876; Pcd; CG30493; pr; Sam-S; Pdxk; CG17691; Las; ATPCL; CG42503
GO:0010467	3.67734e-13	1.41464	752.204	900	2298	gene expression	2.30078e-12	CkIIalpha; elav; l(1)1Bi; Rbf; RpL22; RpL36; CG14786; CG11418; sta; MED18; mRpL16; mip130; east; CG4045; usp; eIF2B-epsilon; csw; CG3071; mRpL14; crn; msta; CG8636; tko; sgg; eIF2B-beta; CG2685; CG10802; tyf; CG2982; mRpL33; Nsun2; CG3527; mRpL30; Cbp80; rb; snf; Rnp4F; Cdk7; CG4119; RpL35; IntS6; CG5941; Spt6; wuho; RpL7A; schlank; RpL17; CG3198; ct; NELF-B; NA; fs(1)h; RpS6; CG2263; e(r); HP1b;…
GO:0023061	4.49782e-13	3.29163	49.7541	93	152	signal release	2.80173e-12	Vap-33A; CHOp24; cm; AP-1gamma; Synj; gbb; or; gammaSnap1; Snap29; CG3608; Letm1; Eps-15; nSyb; Rop; Syx17; p24-1; Tomosyn; comt; opm; HDAC6; Chc; X11L; AP-1-2beta; Clc; alphaSnap; Sec3; Arl1; Syx13; Nrx-IV; Exo70; lqf; Syx16; Sec5; Snapin; l(2)gl; CG7338; Cdk12; Csp; Arf79F; Sec8; RpL35A; Gdi; Stam; Syx5; BicD; Dap160; Arl2; Vps45; eca; AP-1mu; Snap24; gammaSnap2; Snx3; Nsf2; Hsc70-4; Akt1; Endo…
GO:0030163	5.06413e-13	2.4326	89.0337	146	272	protein catabolic process	3.14065e-12	SkpA; Edem1; wds; Zw10; sgg; CG4165; CG3016; Ubi-p5E; Ppt1; Moe; Prosalpha3; Vps20; snama; CG3356; Rpn8; slik; CG30421; key; CG32479; CG9153; CG12082; ida; Rpt3; CG2247; Usp7; CkIalpha; REG; shtd; CG8184; Prosalpha4; CG9086; CG7288; CG7280; Rpn1; l(3)76BDr; Rpn12; Prosbeta6; Prosbeta2; Vps36; vih; Rpt4R; Ube3a; Ufd1-like; Uch-L5; CG5087; Cbl; Uba2; Ubp64E; mad2; Rpt6; morgue; RpL40; Su(dx); Uch; …
GO:0090304	5.14443e-13	1.469	566.608	698	1731	nucleic acid metabolic process	3.17652e-12	CkIIalpha; elav; l(1)1Bi; SkpA; Rbf; CG14786; CG11418; sta; MED18; mip130; CG4045; usp; csw; pn; CG3071; crn; sgg; CG2685; CG10802; CG2982; mei-9; Nsun2; CG3527; Cbp80; snf; Rnp4F; Cdk7; Mcm3; XRCC1; CG4119; CG4078; IntS6; Spt6; wuho; Top3beta; schlank; Mcm6; nonC; CG3198; ct; NELF-B; Upf2; fs(1)h; RpS6; CG2263; e(r); HP1b; dalao; c12.1; Zpr1; Bx42; CG7246; Aats-lys; CG2990; CG2972; Ipod; CG9344;…
GO:0090066	5.69425e-13	2.86705	62.8473	111	192	regulation of anatomical structure size	3.50072e-12	Rbf; AMPKalpha; DAAM; pck; deltaCOP; Fas2; spoon; MAPk-Ak2; sqh; Nrg; Lst8; cpa; Rbpn-5; gek; zip; Pdk1; Rabex-5; Rac1; RpL8; Girdin; kst; CG14977; Src64B; dsh; bif; lic; Chc; mbt; Arpc3B; RhoGAPp190; Cdc42; gig; serp; Lasp; flr; Nrx-IV; crim; path; Arp3; pbl; sinu; CG3921; Thor; Arpc5; Sec24CD; cpb; cold; Rheb; Madm; Gel; Arpc4; mmy; Liprin-alpha; nrv2; Rack1; Btk29A; raw; SCAR; crok; Tor; p38b;…
GO:0043484	6.8336e-13	5.54255	25.2044	56	77	regulation of RNA splicing	4.18299e-12	crn; snf; CG4119; vir; pUf68; CG7879; Rbp1-like; l(1)G0007; CG6227; U2af50; asf1; CG6841; Pep; l(3)72Ab; CG10418; CG7185; Trn-SR; U2af38; Rm62; CG14641; Hel25E; eIF-4a; Hrb27C; snRNP-U1-70K; x16; Srp54; Rsf1; Rbp1; B52; Hrb87F; sqd; CG16941; snRNP-U1-C; how; tst; Rox8; CG5728; Saf-B; Hrb98DE; CG1646; Prp19; Psi; fus; pea; fand; fl(2)d; Dbp45A; TBPH; Caper; SC35; LSm-4; CG34362; Parp; qkr58E-3; CG…
GO:0031667	7.25913e-13	2.81487	64.484	113	197	response to nutrient levels	4.42431e-12	CkIIalpha; Rbf; AMPKalpha; dor; Ns3; usp; CG3071; Nmd3; CG3527; Atg5; l(1)G0020; CG7246; CG2972; Atg8a; CG4038; Fib; Dcp-1; eIF6; Snap29; Nxt1; Nop60B; Atg2; Syx17; Ran; CkIIbeta; Jafrac1; Rtc1; shi; Atg101; car; pcm; gig; HLH106; NA; Adgf-A; l(3)72Dn; CG12301; CG6878; NHP2; endos; Atg1; Sod; SH3PX1; Hsp27; Atg18a; Thor; Itp-r83A; Rheb; Atg17; CG9107; l(2)k09022; nop5; Rack1; CG13097; Mtpalpha; B…
GO:0051493	9.07826e-13	4.05296	35.6789	72	109	regulation of cytoskeleton organization	5.50929e-12	SkpA; DAAM; Ocrl; spoon; sqh; mys; Moe; cpa; gek; fwd; Klp61F; alpha-Spec; pav; Src64B; dsh; shi; Rok; if; Arpc3B; beta-Spec; Cdc42; flr; RhoGAP68F; Arp3; mad2; ed; Arpc5; CG7261; cpb; Sec8; Gel; stai; Arpc4; Btk29A; SCAR; Arpc1; CG5869; fws; Arpc2; ik2; bru; dia; skap; sals; twf; Abi; Atx2; gish; RhoGAP92B; spas; jar; atl; Exo84; WASp; ncd; spn-F; ena; Patronin; Rho1; LamC; shot; tum; cnn; wash;…
GO:0048024	1.13747e-12	6.00061	22.9131	52	70	regulation of mRNA splicing, via spliceosome	6.87343e-12	crn; snf; CG4119; vir; pUf68; CG7879; Rbp1-like; l(1)G0007; CG6227; U2af50; asf1; CG6841; Pep; l(3)72Ab; CG10418; CG7185; Trn-SR; U2af38; Rm62; CG14641; Hel25E; eIF-4a; Hrb27C; snRNP-U1-70K; x16; Srp54; Rsf1; Rbp1; B52; Hrb87F; sqd; CG16941; snRNP-U1-C; how; tst; Rox8; CG5728; Saf-B; Hrb98DE; CG1646; Prp19; Psi; pea; fand; fl(2)d; Dbp45A; Caper; SC35; LSm-4; CG34362; qkr58E-3; CG17454
GO:0009058	1.1579e-12	1.39004	817.015	966	2496	biosynthetic process	6.91447e-12	CkIIalpha; NA; cin; CG3038; l(1)1Bi; SkpA; Rbf; RpL22; RpL36; CG14786; dor; sta; MED18; mRpL16; mip130; usp; CG4406; eIF2B-epsilon; csw; pn; CG3071; mRpL14; CG8636; tko; sgg; eIF2B-beta; CG10802; tyf; GlcAT-I; CG2982; mRpL33; mRpL30; rb; Cdk7; Mcm3; RpL35; CG4078; CG3011; GAA1; CG5941; Spt6; Marf; RpL7A; schlank; Mcm6; COQ7; RpL17; cm; ct; NELF-B; Gclc; fs(1)h; RpS6; CG10932; CG11190; CG2263; Spt…
GO:0016054	1.15893e-12	7.3433	19.3125	46	59	organic acid catabolic process	6.91447e-12	CG9577; arg; CG3699; Spat; CG4586; Acox57D-p; Acox57D-d; Thiolase; CG9149; Gad1; v; pdgy; CG7860; Mfe2; CG7430; CG8745; CG10361; CG6638; CG12262; Hn; ppl; CG9547; Mtpalpha; yip2; CG6415; hgo; CG17544; CG9319; CG8665; CG1041; GstZ2; GstZ1; CG3999; CG4860; Ssadh; CG12428; CG3267; CG11208; CG6543; Egm; Etf-QO; Gdh; CG5009; Sardh; CG9527; CG14688
GO:0046395	1.15893e-12	7.3433	19.3125	46	59	carboxylic acid catabolic process	6.91447e-12	CG9577; arg; CG3699; Spat; CG4586; Acox57D-p; Acox57D-d; Thiolase; CG9149; Gad1; v; pdgy; CG7860; Mfe2; CG7430; CG8745; CG10361; CG6638; CG12262; Hn; ppl; CG9547; Mtpalpha; yip2; CG6415; hgo; CG17544; CG9319; CG8665; CG1041; GstZ2; GstZ1; CG3999; CG4860; Ssadh; CG12428; CG3267; CG11208; CG6543; Egm; Etf-QO; Gdh; CG5009; Sardh; CG9527; CG14688
GO:0051239	1.23432e-12	1.78233	213.746	298	653	regulation of multicellular organismal process	7.33333e-12	SkpA; sdk; RpL22; AMPKalpha; DAAM; inc; Ns3; usp; csw; sgg; lva; Fas2; CHOp24; CG3527; Top3beta; Ctr1A; slpr; Ppt1; Rbm13; Dsor1; fh; CG7246; mago; Egfr; Rae1; GM130; babos; l(2)06496; gbb; Chi; HSPC300; Dat; CG3608; Nurf-38; pain; Eps-15; Pdk1; fwd; Cypl; Trh; trio; Rabex-5; Rac1; alpha-Spec; R; msn; Hsp83; CG11583; Rop; Rpd3; Src64B; dyl; Dlic; dsh; hop; dlg1; bif; p24-1; lic; Yp3; ben; opm; To…
GO:0048585	1.31905e-12	2.28931	99.1809	158	303	negative regulation of response to stimulus	7.8039e-12	Roc1a; SkpA; AMPKalpha; dor; pn; sgg; Rala; Fas2; ct; flw; cpa; Egfr; Tim10; Vps20; MAN1; Nxt1; Eps-15; E(bx); Sac1; msn; Atg2; CG12082; ImpL2; Rpd3; dsh; CkIalpha; pdgy; vap; sl; Rok; fu; Ulp1; car; dome; gig; Spn77Ba; asf1; MESR6; Mkp3; Chmp1; Vps60; dlp; Atg1; dally; Cbl; GstO2; Atg18a; UbcE2M; pbl; Dd; ed; Su(dx); GlyP; cpb; dock; ebi; lwr; l(2)gl; pzg; Csp; Lam; Pez; Spn27A; Mnn1; Spn28Dc; A…
GO:0008360	1.64803e-12	3.85367	37.3156	74	114	regulation of cell shape	9.70966e-12	Fas2; MAPk-Ak2; Rab18; mys; slpr; NA; Cdk9; HSPC300; CG7028; Rac1; alpha-Spec; R; msn; Hsp83; dyl; dsh; hop; Ran; Rok; AnxB11; if; par-6; Vav; Cdc42; pbl; Rac2; ed; Sec24CD; l(2)gl; Pitslre; Ten-m; Hem; Arf79F; Sec23; CG12007; Arpc4; PDZ-GEF; CG7115; mts; Pvr; raw; SCAR; Lar; Arpc2; Fs(2)Ket; dia; RhoL; Abi; Sra-1; Akt1; Pk92B; Rab11; Cortactin; Rab1; CASK; Mtl; WASp; neo; mey; ena; RhoGEF2; Rho1…
GO:0009991	1.81441e-12	2.74875	65.1386	113	199	response to extracellular stimulus	1.06456e-11	CkIIalpha; Rbf; AMPKalpha; dor; Ns3; usp; CG3071; Nmd3; CG3527; Atg5; l(1)G0020; CG7246; CG2972; Atg8a; CG4038; Fib; Dcp-1; eIF6; Snap29; Nxt1; Nop60B; Atg2; Syx17; Ran; CkIIbeta; Jafrac1; Rtc1; shi; Atg101; car; pcm; gig; HLH106; NA; Adgf-A; l(3)72Dn; CG12301; CG6878; NHP2; endos; Atg1; Sod; SH3PX1; Hsp27; Atg18a; Thor; Itp-r83A; Rheb; Atg17; CG9107; l(2)k09022; nop5; Rack1; CG13097; Mtpalpha; B…
GO:0048523	1.85777e-12	1.57734	356.789	462	1090	negative regulation of cellular process	1.08549e-11	CkIIalpha; elav; Appl; Roc1a; SkpA; sdk; Rbf; AMPKalpha; dor; mip130; usp; CG14812; csw; pn; wds; Zw10; sgg; Rala; CG2982; mei-9; Fas2; Cbp80; rb; Mcm3; spoon; ct; NELF-B; mys; fs(1)h; HP1b; Dsor1; flw; cpa; mago; Egfr; NC2alpha; Rae1; Vps20; eIF2B-delta; CG13551; Dcp-1; Sesn; MAN1; Not11; Snap29; spag; key; Eps-15; Pdk1; fwd; E(bx); Sac1; Rac1; Klp61F; Patj; alpha-Spec; MEP-1; msn; Atg2; Hsp83; …
GO:2000026	1.8843e-12	1.9547	152.536	224	466	regulation of multicellular organismal development	1.09646e-11	SkpA; sdk; DAAM; csw; sgg; lva; Fas2; Top3beta; slpr; Ppt1; fh; mago; Egfr; Rae1; GM130; babos; gbb; Chi; HSPC300; Eps-15; fwd; trio; Rac1; alpha-Spec; R; msn; Rop; Rpd3; Src64B; dyl; Dlic; dsh; hop; dlg1; bif; lic; Yp3; ben; Top1; CG3560; caz; mbt; Rok; Pp2B-14D; beta-Spec; RhoGAPp190; Ulp1; Cdc42; gig; polo; Rab8; trc; MED11; Capr; TSG101; Lasp; brm; dlp; blue; Abp1; RhoGAP68F; simj; Dronc; fry…
GO:1901135	1.97131e-12	1.86648	177.413	254	542	carbohydrate derivative metabolic process	1.14239e-11	CG32230; CG3038; CG14786; CG4406; Pgd; CG3621; pn; GlcAT-I; l(1)G0334; GAA1; CG3160; CG3446; CG3192; CG18624; CG11190; ND75; CG12065; Ost48; Hex-A; Idgf4; l(1)G0230; ras; CG4302; CG10320; Ppcdc; blw; levy; Tal; Galphas; cN-IIIB; NDUFA8; Gyk; mtacp1; Cht2; oxt; CG16758; CG12009; CG12016; Cht7; CG12006; Hexo1; CG17333; sesB; FucT6; CG32649; ade5; nmdyn-D6; CG5548; Gapdh2; CG9172; CG3560; CG5703; Pf…
GO:0051247	2.58182e-12	2.77139	63.1746	110	193	positive regulation of protein metabolic process	1.49008e-11	Pgd; wds; sgg; tyf; CG5941; CG3198; slpr; Dsor1; mago; Lpt; eIF-5A; slik; Rabex-5; Rac1; Cdc37; msn; Jafrac2; Strip; ida; Src64B; CkIalpha; lic; ben; mbt; CG9099; fu; gig; CG14184; CG10754; vih; Ufd1-like; Dronc; fry; MED24; mxt; Fnta; ebi; mTerf3; Cdk12; Rheb; Atg17; ksr; betaggt-I; Hrb27C; smt3; Mnn1; Cka; Pvr; Su(var)205; Cks30A; RnrL; l(2)gd1; Tor; p38b; Cdc23; ik2; Pomp; Dap160; eIF4AIII; Mk…
GO:0048589	2.72301e-12	2.14002	114.893	177	351	developmental growth	1.56517e-11	SkpA; RpL22; DAAM; Ns3; usp; sgg; Fas2; CG3527; sqh; mys; slpr; Nrg; Rbm13; Dsor1; CG7246; Rae1; gbb; HSPC300; spag; CG3608; Eps-15; Pdk1; trio; Rabex-5; cue; Rac1; Strip; Eip63E; CG11583; Src64B; sesB; dsh; dlg1; bif; lic; ben; CG8939; caz; Rok; Cdc42; Tao; Alr; gig; alphaSnap; Rab8; trc; fz2; Capr; TSG101; Tollo; dlp; Gl; Liprin-beta; Abp1; Atg1; RhoGAP68F; Plod; simj; path; dally; Arp3; Rac2; …
GO:0048584	3.21725e-12	2.08303	123.076	187	376	positive regulation of response to stimulus	1.84138e-11	CkIIalpha; CG14812; Pgd; CG32795; CHOp24; CG3198; slpr; Crag; e(r); Dsor1; mago; Egfr; Swim; Dcp-1; Galphas; Nurf-38; key; E(bx); CG32479; trio; Rac1; Cdc37; HBS1; msn; Jafrac2; Strip; CG14977; ImpL2; dsh; PGRP-SA; lic; ben; opm; shi; Chc; mbt; Rok; CG9099; betaCOP; Atg101; Cdc42; Tao; CG14184; NA; PDCD-5; brm; dlp; mop; CG10960; CG10754; nst; CG8108; Dronc; Taf2; GNBP3; dally; Arp3; lqf; Rac2; K…
GO:0019222	3.22957e-12	1.44857	568.244	695	1736	regulation of metabolic process	1.84138e-11	CkIIalpha; elav; SkpA; Rbf; CG14786; MED18; mip130; Ocrl; east; usp; CG14812; csw; Pgd; pn; CG3071; crn; msta; wds; Zw10; sgg; eIF2B-beta; Rala; tyf; CG2982; Cbp80; Torsin; rb; snf; Cdk7; RhoGAP5A; CG4119; CG4078; MAPk-Ak2; CG5941; Spt6; schlank; CG3198; ct; NELF-B; fs(1)h; slpr; Crag; e(r); HP1b; dalao; Dsor1; fh; flw; PPP4R2r; Ipod; Atg8a; cpa; CG30291; mago; NC2alpha; CG10306; Rae1; blw; MED23…
GO:0016050	3.66579e-12	5.19422	25.2044	55	77	vesicle organization	2.0817e-11	Sec22; dor; rb; cm; p115; AP-1gamma; or; Vti1; nSyb; comt; g; shi; Chc; car; AP-1-2beta; Clc; alphaSnap; Arl1; Syx13; SH3PX1; Membrin; Sec5; Drp1; Rab5; Sec24CD; Sec23; Pi4KIIalpha; Vps24; Tango1; Rbsn-5; Rab14; Vps16A; Vps45; AP-1mu; Vps39; Gos28; Rab11; AP-2sigma; Sar1; AP-2mu; Sec13; AP-1sigma; Syx1A; Vps33B; WASp; Vps16B; CDase; unc-104; Sec24AB; Vamp7; AP-2alpha; Hrs; ltd; lt; Sec16
GO:0051297	3.70449e-12	3.44574	42.5529	81	130	centrosome organization	2.09526e-11	SkpA; mip130; crn; RpL35; RpL7A; RpL17; RpS6; CG7033; Act57B; Rae1; Fib; RpL19; Cdc5; Klp61F; RpL23A; RpL8; Hsp83; RpL28; Rcd5; pav; Klp10A; Hsc70-3; Tcp-1zeta; Nup153; Grip84; Nup205; polo; Gl; RpS4; RpL10Ab; nudE; Klp67A; RpL14; RpL27A; gammaTub23C; RpL13A; Prosbeta7; Ubc6; Lam; eIF-4a; mts; emb; RpL13; RpL7; Cnot4; RpL9; RpL24; RpL30; Sgt1; skap; alphaTub85E; tws; RpL3; mgr; NA; CHORD; mask; R…
GO:0048488	4.23368e-12	7.91782	17.3485	42	53	synaptic vesicle endocytosis	2.38503e-11	rb; cm; Ppt1; AP-1gamma; Synj; or; Eps-15; shi; Chc; AP-1-2beta; Clc; Dab; Arl1; fwe; lqf; sfl; Drp1; Rab5; Csp; Arf79F; aux; Stam; BicD; Dap160; Arl2; AP-1mu; twf; EndoA; Synd; AP-2sigma; CASK; AP-2mu; Nrx-1; AP-1sigma; Arf51F; stmA; Arf102F; AP-2alpha; Lrrk; lqfR; mnb; tweek
GO:0048699	4.97896e-12	1.6222	297.87	393	910	generation of neurons	2.79375e-11	CkIIalpha; Appl; Roc1a; SkpA; sdk; AMPKalpha; CG11448; DAAM; rush; usp; csw; crn; Vinc; Rala; lva; Fas2; Ptp4E; GAA1; sqh; ct; sn; mys; Nrg; Ppt1; Moe; ric8a; ras; shg; Egfr; HmgD; GM130; babos; wdp; Dcp-1; tsr; Chi; betaTub60D; gek; uzip; zip; E(bx); trio; Sac1; Rac1; Patj; alpha-Spec; alphaCOP; R; MEP-1; msn; Hsp83; Strip; CG12082; prominin-like; Rpd3; Src64B; Con; Dlic; dsh; hop; Ran; Gtp-bp; …
GO:0034330	5.95529e-12	5.76695	22.2584	50	68	cell junction organization	3.32837e-11	alpha-Cat; pck; RhoGAP5A; bou; Nrg; shg; Rac1; Patj; R; kst; Src64B; dlg1; shi; Rok; par-6; Tsf2; Nrx-IV; crim; Rac2; Galphai; sinu; CG3921; cold; l(2)gl; Cont; PDZ-GEF; nrv2; wol; crok; Gli; GckIII; Rab11; crb; jar; mesh; kune; cora; Lac; Galphao; Atpalpha; Pten; vari; arm; p120ctn; rl; Csk; moody; aPKC; Src42A; awd
GO:0022618	1.03443e-11	7.72739	17.0211	41	52	ribonucleoprotein complex assembly	5.75859e-11	sta; CG3198; LSm1; DCP1; eIF6; pUf68; CG11583; Rbp1-like; U2af50; eIF-2alpha; pcm; CG7564; Smn; AGO2; Prp31; eIF-2beta; RpS17; mxt; mTerf3; CG7338; Ddx1; x16; r2d2; Srp54; me31B; Ge-1; FBXO11; Rbp1; B52; Patr-1; snRNP-U1-C; LSm3; CG7006; stau; icln; HPS4; Dcr-2; AGO1; SC35; RpL5; CG13185
GO:0036465	1.30163e-11	7.25714	17.6758	42	54	synaptic vesicle recycling	7.21766e-11	rb; cm; Ppt1; AP-1gamma; Synj; or; Eps-15; shi; Chc; AP-1-2beta; Clc; Dab; Arl1; fwe; lqf; sfl; Drp1; Rab5; Csp; Arf79F; aux; Stam; BicD; Dap160; Arl2; AP-1mu; twf; EndoA; Synd; AP-2sigma; CASK; AP-2mu; Nrx-1; AP-1sigma; Arf51F; stmA; Arf102F; AP-2alpha; Lrrk; lqfR; mnb; tweek
GO:0045216	1.35216e-11	5.6502	21.9311	49	67	cell-cell junction organization	7.46857e-11	alpha-Cat; pck; RhoGAP5A; bou; Nrg; shg; Rac1; Patj; R; kst; Src64B; dlg1; shi; par-6; Tsf2; Nrx-IV; crim; Rac2; Galphai; sinu; CG3921; cold; l(2)gl; Cont; PDZ-GEF; nrv2; wol; crok; Gli; GckIII; Rab11; crb; jar; mesh; kune; cora; Lac; Galphao; Atpalpha; Pten; vari; arm; p120ctn; rl; Csk; moody; aPKC; Src42A; awd
GO:0000902	1.37875e-11	1.65867	256.954	344	785	cell morphogenesis	7.58583e-11	CkIIalpha; Appl; AMPKalpha; CG11448; DAAM; rush; usp; Vinc; sgg; Rala; lva; Fas2; Ptp4E; MAPk-Ak2; Rab18; sqh; ct; sn; mys; slpr; Nrg; Ppt1; Moe; NA; ras; cpa; shg; HmgD; GM130; babos; Vps20; Cdk9; tsr; Chi; HSPC300; betaTub60D; slik; uzip; E(bx); CG7028; trio; Sac1; Rac1; Patj; alpha-Spec; alphaCOP; R; MEP-1; msn; Hsp83; Strip; CG12082; prominin-like; Rpd3; Src64B; dyl; Dlic; dsh; hop; Ran; Gtp-…
GO:0009605	1.40188e-11	1.58905	312.927	408	956	response to external stimulus	7.68318e-11	CkIIalpha; Rbf; ssx; AMPKalpha; DAAM; dor; Ns3; usp; CG3071; Nmd3; tko; sgg; CG32795; Rala; Vap-33A; tyf; Fas2; CG3527; Ptp4E; CG16756; Spt6; ogre; CBP; Atg5; ct; mys; Nrg; Crag; Ppt1; Moe; l(1)G0020; CG7246; CG2972; nocte; ras; Atg8a; CG10543; shg; CG4038; Tim10; Fib; CG13551; Dcp-1; PebIII; Chi; Phm; eIF6; Snap29; Nxt1; Nop60B; betaTub60D; uzip; zip; pain; key; CG13890; trio; Sac1; Myo61F; Rac1…
GO:0051301	1.48775e-11	2.16719	103.109	160	315	cell division	8.12231e-11	Rab35; dor; Ocrl; Zw10; sgg; Act5C; sqh; Moe; ric8a; flw; Act57B; shg; Sara; CycB; tsr; Zfrp8; slik; zip; fwd; pUf68; alphaCOP; kst; ida; pav; Rop; hop; dlg1; Gbeta13F; shi; eas; Rok; Sep4; par-6; Cdc42; polo; alphaSnap; CSN1b; Pex1; endos; Syx13; vih; eIF-4E; Klp67A; bol; dally; pbl; Rint1; Galphai; mad2; Sep1; Sec5; Cog3; Drp1; mio; Pex12; l(2)gl; fbl; CSN3; Chro; Sec8; Gmd; eIF-4a; CG9135; chi…
GO:0007269	1.73639e-11	3.44082	39.9342	76	122	neurotransmitter secretion	9.44331e-11	Vap-33A; cm; AP-1gamma; Synj; gbb; or; gammaSnap1; Snap29; Letm1; Eps-15; nSyb; Rop; Syx17; Tomosyn; comt; HDAC6; Chc; X11L; AP-1-2beta; Clc; alphaSnap; Sec3; Arl1; Syx13; Nrx-IV; Exo70; lqf; Syx16; Sec5; Snapin; l(2)gl; Csp; Arf79F; Sec8; Gdi; Stam; Syx5; BicD; Dap160; Arl2; Vps45; AP-1mu; Snap24; gammaSnap2; Nsf2; Hsc70-4; EndoA; Dys; Synd; Sec15; AP-2sigma; CASK; AP-2mu; AP-1sigma; Sec10; Syx1…
GO:0022604	1.82595e-11	2.85169	54.9914	97	168	regulation of cell morphogenesis	9.89229e-11	DAAM; Rala; lva; Fas2; MAPk-Ak2; Rab18; mys; slpr; Ppt1; NA; GM130; babos; Cdk9; HSPC300; CG7028; trio; Rac1; alpha-Spec; R; msn; Hsp83; Rpd3; dyl; Dlic; dsh; hop; Ran; bif; Rok; AnxB11; if; par-6; RhoGAPp190; Vav; Cdc42; trc; fry; pbl; Rac2; Elp3; ed; Sec24CD; l(2)gl; Pitslre; Ten-m; Hem; Arf79F; Sec23; CG12007; Arpc4; PDZ-GEF; Liprin-alpha; CG7115; mts; Pvr; raw; SCAR; Lar; Arpc2; Fs(2)Ket; dia…
GO:0007093	1.85806e-11	4.0937	31.0963	63	95	mitotic cell cycle checkpoint	1.00279e-10	SkpA; Rbf; wds; Zw10; mei-9; Mcm3; Dsor1; E(bx); Rcd5; RpII215; rept; CSN1b; Pop2; Mcm7; MED4; mad2; lwr; CSN3; Rpb8; Chro; Rga; Mnn1; CSN8; alien; me31B; Cdk1; mre11; spel1; Top2; alphaTub84B; RpA-70; M1BP; alphaTub85E; Kap-alpha3; pont; Tctp; MBD-R2; pic; RpII15; CSN5; MED17; Fancd2; CSN6; BRWD3; Ald; Bub3; BubR1; Spt5; Lis-1; Rcd1; Mtor; Rpb5; Su(var)2-10; Mad1; CSN7; Cul4; Cul1; CSN4; eIF4G; …
GO:0072657	1.88775e-11	6.51829	18.9851	44	58	protein localization to membrane	1.01493e-10	TRAM; GAA1; Crag; Tim10; Nup214; Gtp-bp; Nup93-1; shi; X11L; Cdc42; CG6404; Srp68; CG4942; SrpRbeta; Srp9; Sec63; Srp19; Srp54k; Sec5; Sec24CD; Sec23; Sec61alpha; PIG-U; CG5885; Trp1; TM9SF4; CG31229; Srp72; Rab11; Sec15; Sar1; CG10420; Exo84; CG5447; cora; Sec6; Sec61beta; boca; Nup154; Fur1; arm; Srp14; aPKC; PIG-S
GO:0050684	1.90433e-11	4.76023	25.859	55	79	regulation of mRNA processing	1.01997e-10	elav; crn; snf; CG4119; vir; pUf68; CG7879; Rbp1-like; l(1)G0007; CG6227; U2af50; asf1; CG6841; Pep; l(3)72Ab; CG10418; CG7185; Trn-SR; U2af38; Rm62; CG14641; Hel25E; eIF-4a; Hrb27C; snRNP-U1-70K; x16; Srp54; Rsf1; piwi; swm; Rbp1; B52; Hrb87F; sqd; CG16941; snRNP-U1-C; how; tst; Rox8; CG5728; Saf-B; Hrb98DE; CG1646; Prp19; Psi; pea; fand; fl(2)d; Dbp45A; Caper; SC35; LSm-4; CG34362; qkr58E-3; CG…
GO:0051235	1.93962e-11	4.2269	29.787	61	91	maintenance of location	1.03407e-10	alpha-Cat; Roc1a; AMPKalpha; Actn; deltaCOP; Vinc; rb; Act5C; sktl; mago; blw; zip; CG9186; alphaCOP; pav; ImpL2; Lsd-2; Rok; if; betaCOP; Indy; zetaCOP; SsRbeta; CdsA; pbl; Rac2; CG10671; Su(dx); Ilk; SPoCk; Arf79F; Itp-r83A; chic; KdelR; Ubc2; beta'COP; cact; mdy; Pax; dia; alpha-Est7; by; Su(fu); foxo; Akt1; mask; p38c; pins; Dg; tum; Tapdelta; Acsl; Ank; Pten; ltd; arm; Parp; Ank2; Msp300; rh…
GO:1903311	1.94529e-11	4.65351	26.5137	56	81	regulation of mRNA metabolic process	1.03407e-10	elav; crn; snf; CG4119; vir; pUf68; CG7879; Upf1; Rbp1-like; l(1)G0007; CG6227; U2af50; asf1; CG6841; Pep; l(3)72Ab; CG10418; CG7185; Trn-SR; U2af38; Rm62; CG14641; Hel25E; eIF-4a; Hrb27C; snRNP-U1-70K; x16; Srp54; Rsf1; piwi; swm; Rbp1; B52; Hrb87F; sqd; CG16941; snRNP-U1-C; how; tst; Rox8; CG5728; Saf-B; Hrb98DE; CG1646; Prp19; Psi; pea; fand; fl(2)d; Dbp45A; Caper; SC35; LSm-4; CG34362; qkr58E…
GO:0032270	2.02827e-11	2.71535	60.2287	104	184	positive regulation of cellular protein metabolic process	1.07415e-10	Pgd; wds; sgg; tyf; CG5941; CG3198; slpr; Dsor1; mago; Lpt; eIF-5A; slik; Rabex-5; Rac1; Cdc37; msn; Jafrac2; Strip; ida; Src64B; CkIalpha; lic; ben; mbt; CG9099; fu; gig; CG14184; CG10754; vih; Ufd1-like; Dronc; fry; MED24; mxt; Fnta; ebi; mTerf3; Cdk12; Rheb; Atg17; ksr; betaggt-I; Hrb27C; smt3; Mnn1; Cka; Pvr; Su(var)205; Cks30A; RnrL; Tor; p38b; Cdc23; ik2; Pomp; Dap160; eIF4AIII; Mkk4; M1BP;…
GO:0032989	2.12894e-11	1.59861	297.87	390	910	cellular component morphogenesis	1.12325e-10	CkIIalpha; Appl; Rbf; CG13366; AMPKalpha; CG11448; DAAM; rush; mip130; Actn; usp; Vinc; sgg; Rala; lva; Femcoat; Fas2; Ptp4E; spoon; MAPk-Ak2; Rab18; sqh; Marf; Mcm6; ct; sn; mys; slpr; Cp36; Nrg; Ppt1; Moe; NA; ras; cpa; shg; Egfr; HmgD; GM130; babos; Vps20; Cdk9; tsr; Chi; HSPC300; betaTub60D; Letm1; slik; uzip; zip; E(bx); CG7028; trio; Sac1; Rac1; Patj; alpha-Spec; alphaCOP; R; MEP-1; msn; Hs…
GO:0001505	2.41654e-11	3.2914	42.2255	79	129	regulation of neurotransmitter levels	1.27025e-10	Vap-33A; cm; AP-1gamma; Synj; gbb; or; gammaSnap1; Snap29; Dat; Letm1; Eps-15; nSyb; Rop; Gad1; Syx17; Tomosyn; comt; HDAC6; Chc; X11L; AP-1-2beta; Clc; alphaSnap; Sec3; Arl1; Syx13; Nrx-IV; Exo70; lqf; Syx16; Sec5; Snapin; l(2)gl; Csp; Arf79F; Sec8; Gdi; Stam; Syx5; BicD; Dap160; Arl2; Vps45; AP-1mu; Snap24; gammaSnap2; Nsf2; Hsc70-4; EndoA; Dys; Synd; Sec15; AP-2sigma; CASK; AP-2mu; AP-1sigma; …
GO:0010608	2.63872e-11	3.12641	45.8262	84	140	posttranscriptional regulation of gene expression	1.38191e-10	CG14786; eIF2B-beta; tyf; Cbp80; CG5941; CG10306; eIF2B-delta; l(2)efl; eIF-5A; Not11; DCP1; Tudor-SN; Hsc70-3; CG9099; Rcd-1; pcm; AGO2; Pop2; Hsp67Bc; bol; GAPsec; Unr; Srp9; mxt; Thor; mTerf3; CG7172; Ddx1; Rm62; Rheb; Rga; kra; PEK; eIF3-S10; Hrb27C; r2d2; hoip; me31B; piwi; Ge-1; loqs; vig; UK114; bsf; Nbr; CG1091; bel; Irp-1B; Elp1; Not10; sqd; Hsc70-4; Atx2; Cbp20; Pi3K92E; how; Irp-1A; tw…
GO:0034470	2.7718e-11	3.68126	35.3516	69	108	ncRNA processing	1.44625e-10	sta; CG4045; CG3071; Nsun2; CG3527; IntS6; RpS6; CG2972; CG4038; CG4610; Fib; IntS1; Nop60B; CG32281; IntS10; CG1434; CG8939; IntS2; IntS9; CG12301; NHP2; defl; CG8549; RpS21; Rrp40; dbe; Rpp30; CG9596; nop5; CG13090; CG13097; CG4364; CG6724; CG6388; Nnp-1; loqs; l(2)35Bc; CG9987; CG10463; Nbr; CG1091; CG16790; mtTFB2; CG9799; omd; asun; Mat89Ba; CG5220; l(3)07882; CG18528; CG5728; CG14544; CG118…
GO:0045087	3.1768e-11	2.90769	51.7181	92	158	innate immune response	1.65147e-10	CG32795; Rala; Nrg; Crag; Tim10; Nxt1; key; E(bx); Rac1; HBS1; PGRP-SA; Flo2; betaCOP; Hayan; Vav; Cdc42; dome; Spn77Ba; CG4306; PDCD-5; brm; Tollo; Gl; Dronc; Shc; GNBP3; GstO2; Rac2; LanA; Sec5; GlyP; Hr78; ECSIT; CG2051; mtd; MP1; CG13994; Spn27A; LanB1; Tg; Spn28Dc; Pvr; Etl1; CYLD; bsk; p38b; cact; fon; Hf; dia; Sp7; unc-45; RhoL; MED6; poly; mor; modSP; SPE; Atg6; Pp1alpha-96A; puf; Tl; spz…
GO:0032543	3.75577e-11	49.6071	8.18324	24	25	mitochondrial translation	1.9453e-10	CG14786; mRpL54; Aats-tyr-m; mRpL46; mRpL49; mRpL21; mRpL36; mRpL50; mRpL27; Thor; mRpL48; mTerf3; mRpL44; mRpL28; ico; mRpS23; bsf; mRpL47; Aats-ser; mRpL35; CG4679; mRpL18; mRpL53; mRpL34
GO:0044770	4.10386e-11	2.84213	53.3547	94	163	cell cycle phase transition	2.11783e-10	SkpA; Rbf; wds; Zw10; sgg; mei-9; Mcm3; PpV; Moe; Dsor1; Egfr; Rae1; CycB; slik; E(bx); Psf1; ida; Rcd5; RpII215; Aven; REG; rept; CSN1b; brm; vih; Pop2; bol; dally; Mcm7; MED4; mad2; lwr; CSN3; Rpb8; Chro; Rheb; Rga; PEK; Mnn1; CSN8; alien; Cks30A; pelo; me31B; Cdk1; mre11; Top2; Cdc23; E2f2; alphaTub84B; RpA-70; M1BP; alphaTub85E; Kap-alpha3; Ras85D; tws; pont; Tctp; MBD-R2; pic; RpII15; mor; C…
GO:0032535	4.19705e-11	3.22648	42.5529	79	130	regulation of cellular component size	2.15805e-10	Rbf; AMPKalpha; DAAM; spoon; MAPk-Ak2; Lst8; cpa; Rbpn-5; gek; Pdk1; Rabex-5; Rac1; RpL8; Girdin; kst; CG14977; Src64B; dsh; bif; lic; mbt; Arpc3B; RhoGAPp190; Cdc42; gig; Lasp; flr; path; Arp3; pbl; Thor; Arpc5; cpb; Rheb; Madm; Gel; Arpc4; Liprin-alpha; Rack1; Btk29A; SCAR; Tor; p38b; Arpc1; Syx5; CG5869; Lar; Arpc2; dia; Ras85D; Tctp; sals; foxo; twf; GlyS; Atx2; Akt1; gish; RhoGAP92B; Pi3K92E…
GO:0010647	4.22561e-11	2.18429	96.2349	150	294	positive regulation of cell communication	2.16486e-10	CkIIalpha; CG14812; Pgd; CHOp24; CG3198; slpr; Ppt1; e(r); Dsor1; mago; Swim; Dcp-1; CG3608; Nurf-38; E(bx); CG32479; trio; Cdc37; alpha-Spec; msn; Jafrac2; Strip; CG14977; ImpL2; p24-1; lic; ben; opm; shi; Chc; mbt; CG9099; beta-Spec; Atg101; Tao; CG14184; NA; brm; dlp; mop; CG10960; CG10754; nst; CG8108; Dronc; Taf2; dally; Arp3; lqf; Klp64D; Prpk; wap; Fnta; CG31694; ebi; Ipk2; spen; pzg; CG73…
GO:0008283	4.28667e-11	2.08704	109.001	166	333	cell proliferation	2.18821e-10	Roc1a; Rbf; crn; Inx2; Moe; ric8a; Prosalpha3; Egfr; Vps20; l(2)06496; snama; Zfrp8; spag; Rpn8; Nurf-38; slik; zip; key; Rac1; alpha-Spec; dlt; Hsp83; hop; dlg1; Pdcd4; Top1; CG12608; Gbeta13F; eas; CG3560; CG9099; par-6; Cdc42; dome; gig; polo; Rpn1; fz2; Mkp3; MED11; Cat; CSN1b; Adgf-A; Vps60; Rpn12; brm; Vps36; Dronc; eIF-4E; Cbl; msk; MED4; msl-3; Galphai; vito; CG10576; RpS21; Rab5; lwr; l(…
GO:0023056	4.57776e-11	2.20115	93.9436	147	287	positive regulation of signaling	2.3284e-10	CkIIalpha; CG14812; Pgd; CHOp24; CG3198; slpr; Ppt1; e(r); Dsor1; mago; Swim; CG3608; Nurf-38; E(bx); CG32479; trio; Cdc37; alpha-Spec; msn; Jafrac2; Strip; CG14977; ImpL2; p24-1; lic; ben; opm; shi; Chc; mbt; CG9099; beta-Spec; Tao; CG14184; NA; brm; dlp; mop; CG10960; CG10754; nst; CG8108; Dronc; Taf2; dally; Arp3; lqf; Klp64D; Prpk; wap; Fnta; CG31694; ebi; Ipk2; spen; pzg; CG7338; Cdk12; Rheb…
GO:0032956	5.07214e-11	6.08301	19.3125	44	59	regulation of actin cytoskeleton organization	2.56143e-10	DAAM; Ocrl; spoon; sqh; mys; Moe; cpa; gek; Src64B; dsh; shi; Rok; if; Arpc3B; Cdc42; flr; RhoGAP68F; Arp3; ed; Arpc5; cpb; Gel; Arpc4; Btk29A; SCAR; Arpc1; CG5869; Arpc2; dia; sals; twf; Abi; Atx2; gish; RhoGAP92B; jar; WASp; ena; LamC; wash; Crk; p120ctn; Arpc3A; nwk
GO:0032970	5.07214e-11	6.08301	19.3125	44	59	regulation of actin filament-based process	2.56143e-10	DAAM; Ocrl; spoon; sqh; mys; Moe; cpa; gek; Src64B; dsh; shi; Rok; if; Arpc3B; Cdc42; flr; RhoGAP68F; Arp3; ed; Arpc5; cpb; Gel; Arpc4; Btk29A; SCAR; Arpc1; CG5869; Arpc2; dia; sals; twf; Abi; Atx2; gish; RhoGAP92B; jar; WASp; ena; LamC; wash; Crk; p120ctn; Arpc3A; nwk
GO:0010648	5.29222e-11	2.23802	89.361	141	273	negative regulation of cell communication	2.66306e-10	Roc1a; SkpA; AMPKalpha; dor; pn; sgg; Rala; Fas2; ct; flw; cpa; Egfr; Vps20; Dcp-1; MAN1; Eps-15; E(bx); Sac1; msn; Atg2; CG12082; ImpL2; Rpd3; dsh; CkIalpha; pdgy; vap; sl; fu; Ulp1; car; gig; asf1; MESR6; Mkp3; Chmp1; Vps60; dlp; Atg1; dally; Cbl; Atg18a; UbcE2M; pbl; Dd; ed; Su(dx); cpb; dock; ebi; lwr; l(2)gl; pzg; Pez; Mnn1; Akap200; raw; numb; Pka-C1; Utx; bsk; Stam; l(2)gd1; crol; Tor; ics…
GO:0009894	5.43061e-11	2.9731	48.4448	87	148	regulation of catabolic process	2.72301e-10	wds; Zw10; sgg; schlank; Atg8a; Rae1; Dcp-1; Atg2; ida; Syx17; sesB; Upf1; CkIalpha; REG; Lsd-2; Atg101; gig; HLH106; Rpn1; CG6878; Atg1; vih; Ufd1-like; Sod; Dronc; Hsp67Bc; Atg18a; mad2; GlyP; mio; Atg4a; Chro; Rheb; PEK; Sec61alpha; Cks30A; Utx; bsk; piwi; l(2)gd1; Tor; Acn; Pax; Cdc23; Pomp; alphaTub84B; RagA-B; alphaTub85E; Ras85D; Bruce; pic; foxo; GlyS; FK506-bp1; CSN5; Pi3K92E; Bdbt; Cdc1…
GO:0009968	5.75738e-11	2.32569	80.8504	130	247	negative regulation of signal transduction	2.87665e-10	Roc1a; SkpA; AMPKalpha; dor; pn; sgg; Rala; Fas2; ct; flw; cpa; Egfr; Vps20; MAN1; Eps-15; E(bx); Sac1; msn; Atg2; CG12082; ImpL2; Rpd3; dsh; CkIalpha; pdgy; vap; sl; fu; Ulp1; car; gig; asf1; MESR6; Mkp3; Chmp1; Vps60; dlp; Atg1; dally; Cbl; Atg18a; UbcE2M; pbl; Dd; ed; Su(dx); cpb; dock; ebi; lwr; l(2)gl; pzg; Pez; Mnn1; Akap200; raw; numb; Pka-C1; Utx; bsk; Stam; l(2)gd1; crol; ics; TM9SF4; ME…
GO:0031023	5.96121e-11	3.12481	44.1895	81	135	microtubule organizing center organization	2.96801e-10	SkpA; mip130; crn; RpL35; RpL7A; RpL17; RpS6; CG7033; Act57B; Rae1; Fib; RpL19; Cdc5; Klp61F; RpL23A; RpL8; Hsp83; RpL28; Rcd5; pav; Klp10A; Hsc70-3; Tcp-1zeta; Nup153; Grip84; Nup205; polo; Gl; RpS4; RpL10Ab; nudE; Klp67A; RpL14; RpL27A; gammaTub23C; RpL13A; Prosbeta7; Ubc6; Lam; eIF-4a; mts; emb; RpL13; RpL7; Cnot4; RpL9; RpL24; RpL30; Sgt1; skap; alphaTub85E; tws; RpL3; mgr; NA; CHORD; mask; R…
GO:1902531	6.01401e-11	2.20208	92.6343	145	283	regulation of intracellular signal transduction	2.98379e-10	SkpA; AMPKalpha; CG14812; Pgd; pn; sgg; Rala; RhoGAP5A; MAPk-Ak2; CG3198; slpr; Crag; Dsor1; CG34408; flw; cpa; mago; asrij; E(bx); trio; Sac1; Rabex-5; Cdc37; msn; Atg2; Jafrac2; Strip; CG12082; CG14977; CG1657; hop; lic; ben; vap; mbt; Tao; gig; CG14184; NA; MESR6; Mkp3; Vps60; TSG101; CG10960; CG10754; Atg1; ArfGAP1; CG8108; Taf2; Atg18a; syd; Prpk; wap; Fnta; ed; CG31694; mio; cpb; ebi; Ipk2;…
GO:0048666	6.20144e-11	1.66581	234.368	315	716	neuron development	3.06603e-10	CkIIalpha; Appl; Roc1a; SkpA; AMPKalpha; CG11448; DAAM; rush; usp; csw; Vinc; lva; Fas2; Ptp4E; GAA1; ct; sn; mys; Nrg; Ppt1; Moe; ras; shg; HmgD; GM130; babos; wdp; Dcp-1; tsr; Chi; betaTub60D; gek; uzip; E(bx); trio; Sac1; Rac1; Patj; alpha-Spec; alphaCOP; MEP-1; msn; Strip; CG12082; prominin-like; Rpd3; Src64B; Con; Dlic; dsh; Ran; Gtp-bp; Ptp10D; bif; pot; mew; Bap60; CG2691; ben; mbt; Rok; i…
GO:0000380	6.85788e-11	5.41689	21.2764	47	65	alternative mRNA splicing, via spliceosome	3.36703e-10	crn; snf; CG4119; pUf68; CG7879; Rbp1-like; l(1)G0007; CG6227; U2af50; CG6841; l(3)72Ab; CG10418; CG7185; U2af38; Rm62; CG14641; Hel25E; eIF-4a; snRNP-U1-70K; x16; Srp54; Rsf1; Rbp1; B52; Hrb87F; sqd; CG16941; snRNP-U1-C; how; tst; Rox8; CG5728; Saf-B; Hrb98DE; CG1646; Prp19; Psi; pea; fand; fl(2)d; Dbp45A; Caper; SC35; LSm-4; CG34362; qkr58E-3; CG17454
GO:0000381	6.85788e-11	5.41689	21.2764	47	65	regulation of alternative mRNA splicing, via spliceosome	3.36703e-10	crn; snf; CG4119; pUf68; CG7879; Rbp1-like; l(1)G0007; CG6227; U2af50; CG6841; l(3)72Ab; CG10418; CG7185; U2af38; Rm62; CG14641; Hel25E; eIF-4a; snRNP-U1-70K; x16; Srp54; Rsf1; Rbp1; B52; Hrb87F; sqd; CG16941; snRNP-U1-C; how; tst; Rox8; CG5728; Saf-B; Hrb98DE; CG1646; Prp19; Psi; pea; fand; fl(2)d; Dbp45A; Caper; SC35; LSm-4; CG34362; qkr58E-3; CG17454
GO:0050808	7.21894e-11	2.44593	71.0306	117	217	synapse organization	3.53204e-10	Appl; SkpA; sgg; Vap-33A; Fas2; Top3beta; nonC; Upf2; Nrg; Act57B; Rae1; Synj; gbb; Galphas; HSPC300; Eps-15; Pdk1; trio; Sac1; Rac1; alpha-Spec; Gad1; Src64B; sesB; dlg1; ben; CG9172; caz; beta-Spec; par-6; Cdc42; gig; Rab8; fz2; Smn; dlp; Liprin-beta; Abp1; caps; Atg1; RhoGAP68F; Sod; simj; Arp3; LanA; Elp3; Thor; Got2; cpb; kis; Ten-m; Hem; Rheb; stai; Liprin-alpha; Tor; p38b; Gli; Lar; RtGEF;…
GO:0006952	7.596e-11	1.99151	121.767	181	372	defense response	3.70371e-10	ssx; CG32795; Rala; Vap-33A; tyf; CG3527; CBP; Nrg; Crag; shg; Tim10; CG10433; CG13551; Nxt1; CG3829; emp; CG2736; key; E(bx); CG13890; Myo61F; Rac1; HBS1; Jafrac2; Drsl5; Fit1; Vago; hop; PGRP-SA; CG2247; CG14411; Flo2; Tsf1; betaCOP; Hayan; Vav; Ulp1; Cdc42; dome; Spn77Ba; CG4306; CG7408; NUCB1; PGRP-SB1; PDCD-5; brm; AGO2; Tollo; Gl; Dronc; Hsp27; Shc; GNBP3; GstO2; Atg18a; Rac2; LanA; DIP1; S…
GO:0035556	7.80651e-11	1.76941	181.668	253	555	intracellular signal transduction	3.79327e-10	Rab35; CkIIalpha; SkpA; Rbf; AMPKalpha; CG14812; Pgd; pn; sgg; Rala; RhoGAP5A; CG16721; MAPk-Ak2; Rab18; Mipp2; CG3198; Rab39; slpr; Crag; Arfrp1; Dsor1; Lst8; CG34408; flw; cpa; mago; CG6613; asrij; Lpt; Rap2l; gek; fwd; E(bx); CG3402; RabX6; trio; Sac1; Rabex-5; Rac1; Cdc37; R; msn; Atg2; Jafrac2; Strip; CG12082; CG14977; Ras64B; Src64B; CG1657; dsh; hop; Ran; lic; ben; vap; Graf; sl; mbt; Rok;…
GO:0006888	7.89397e-11	11.039	12.4385	32	38	ER to Golgi vesicle-mediated transport	3.82263e-10	CG4293; Sec22; CHOp24; Ykt6; Syx17; comt; alphaSnap; l(3)76BDm; Arl1; CG7011; Cog3; Sec24CD; Sec23; Madm; CG8552; Trs23; Sec71; eca; Nsf2; Trs33; Gos28; Rab1; Sar1; Sec13; Bet5; Trs31; garz; Sec24AB; boca; Bet3; Sec16; tral
GO:0030182	8.02383e-11	1.60761	271.356	357	829	neuron differentiation	3.87225e-10	CkIIalpha; Appl; Roc1a; SkpA; sdk; AMPKalpha; CG11448; DAAM; rush; usp; csw; crn; Vinc; Rala; lva; Fas2; Ptp4E; GAA1; sqh; ct; sn; mys; Nrg; Ppt1; Moe; ras; shg; Egfr; HmgD; GM130; babos; wdp; Dcp-1; tsr; Chi; betaTub60D; gek; uzip; zip; E(bx); trio; Sac1; Rac1; Patj; alpha-Spec; alphaCOP; R; MEP-1; msn; Hsp83; Strip; CG12082; prominin-like; Rpd3; Src64B; Con; Dlic; dsh; hop; Ran; Gtp-bp; Ptp10D;…
GO:0007095	8.13827e-11	4.94132	23.2404	50	71	mitotic G2 DNA damage checkpoint	3.90085e-10	SkpA; Rbf; wds; mei-9; Mcm3; Dsor1; E(bx); Rcd5; RpII215; rept; CSN1b; Pop2; Mcm7; MED4; lwr; CSN3; Rpb8; Rga; CSN8; alien; me31B; Cdk1; mre11; Top2; RpA-70; M1BP; Kap-alpha3; pont; Tctp; MBD-R2; pic; RpII15; CSN5; MED17; CSN6; BRWD3; Ald; Spt5; Rcd1; Rpb5; Su(var)2-10; CSN7; Cul4; Cul1; CSN4; eIF4G; gfzf; tefu; Not1; Rpb4
GO:0031572	8.13827e-11	4.94132	23.2404	50	71	G2 DNA damage checkpoint	3.90085e-10	SkpA; Rbf; wds; mei-9; Mcm3; Dsor1; E(bx); Rcd5; RpII215; rept; CSN1b; Pop2; Mcm7; MED4; lwr; CSN3; Rpb8; Rga; CSN8; alien; me31B; Cdk1; mre11; Top2; RpA-70; M1BP; Kap-alpha3; pont; Tctp; MBD-R2; pic; RpII15; CSN5; MED17; CSN6; BRWD3; Ald; Spt5; Rcd1; Rpb5; Su(var)2-10; CSN7; Cul4; Cul1; CSN4; eIF4G; gfzf; tefu; Not1; Rpb4
GO:0044089	8.663e-11	4.22865	27.823	57	85	positive regulation of cellular component biogenesis	4.13834e-10	DAAM; Top3beta; gbb; HSPC300; trio; Rac1; dlg1; Bap60; caz; Rok; Arpc3B; par-6; Cdc42; Lasp; Abp1; flr; RhoGAP68F; simj; Arp3; Arpc5; cpb; Rheb; kra; Gel; Arpc4; chic; Su(var)205; SCAR; Tor; Arpc1; CG5869; Arpc2; dia; TfIIFbeta; Arfip; sals; gish; Pak3; RhoGAP92B; psidin; Synd; spas; spz; Apc; WASp; Med; mle; ena; stau; shot; wash; didum; mnb; Arpc3A; msps; Ank2; aPKC
GO:0017038	8.836e-11	4.48508	25.859	54	79	protein import	4.20677e-10	Pex5; sgg; Act57B; Tim10; Nup214; pav; hop; Nup93-1; exd; Stim; Nup153; fu; Nup205; Kap-alpha1; CG7394; msk; lqf; Trn; Rcc1; Ntf-2; Trn-SR; lwr; Pex14; noi; Karybeta3; CG7382; smt3; CG7214; Nup107; Nup160; cact; Cas; Fs(2)Ket; Kap-alpha3; Ras85D; Su(fu); mbo; blp; Akt1; CG31229; Sec13; Nup98-96; Nup358; pll; dco; Gp210; Nup75; Diap2; Nup54; Cam; Mtor; Tom7; Nup50; Cul4
GO:1901988	1.22277e-10	3.65253	33.3876	65	102	negative regulation of cell cycle phase transition	5.78261e-10	SkpA; Rbf; wds; Zw10; mei-9; Mcm3; Dsor1; Egfr; E(bx); Rcd5; RpII215; Aven; rept; CSN1b; brm; Pop2; Mcm7; MED4; mad2; lwr; CSN3; Rpb8; Chro; Rga; Mnn1; CSN8; alien; me31B; Cdk1; mre11; Top2; E2f2; alphaTub84B; RpA-70; M1BP; alphaTub85E; Kap-alpha3; pont; Tctp; MBD-R2; pic; RpII15; mor; CSN5; MED17; CSN6; BRWD3; Ald; Bub3; BubR1; Spt5; Rcd1; Mtor; Rpb5; Su(var)2-10; Mad1; CSN7; Cul4; Cul1; CSN4; e…
GO:1901991	1.22277e-10	3.65253	33.3876	65	102	negative regulation of mitotic cell cycle phase transition	5.78261e-10	SkpA; Rbf; wds; Zw10; mei-9; Mcm3; Dsor1; Egfr; E(bx); Rcd5; RpII215; Aven; rept; CSN1b; brm; Pop2; Mcm7; MED4; mad2; lwr; CSN3; Rpb8; Chro; Rga; Mnn1; CSN8; alien; me31B; Cdk1; mre11; Top2; E2f2; alphaTub84B; RpA-70; M1BP; alphaTub85E; Kap-alpha3; pont; Tctp; MBD-R2; pic; RpII15; mor; CSN5; MED17; CSN6; BRWD3; Ald; Bub3; BubR1; Spt5; Rcd1; Mtor; Rpb5; Su(var)2-10; Mad1; CSN7; Cul4; Cul1; CSN4; e…
GO:0019941	1.27106e-10	2.26447	83.1418	132	254	modification-dependent protein catabolic process	5.99094e-10	SkpA; Edem1; wds; Zw10; sgg; CG4165; CG3016; Ubi-p5E; Moe; Prosalpha3; Vps20; snama; CG3356; Rpn8; slik; CG30421; CG32479; CG9153; CG12082; ida; Rpt3; CG2247; Usp7; CkIalpha; shtd; CG8184; Prosalpha4; CG7288; Rpn1; l(3)76BDr; Rpn12; Prosbeta6; Prosbeta2; Vps36; vih; Rpt4R; Ube3a; Ufd1-like; Uch-L5; CG5087; Cbl; Uba2; Ubp64E; mad2; Rpt6; morgue; RpL40; Su(dx); Uch; Rpn10; Chro; Rpn5; Prosbeta7; Ub…
GO:0009611	1.29591e-10	3.69575	32.733	64	100	response to wounding	6.08776e-10	Appl; sqh; sn; shg; Egfr; zip; Rac1; msn; Atg2; kst; Rok; Ulp1; Cdc42; pcm; Alr; CG4306; Rac2; ple; Gs1l; ed; CG33123; cold; rgn; Csp; Arpc4; mtm; chic; Spn27A; Tg; Spn28Dc; CG7627; Mtpalpha; holn1; RnrL; Utx; bsk; CG6750; Stam; fon; dia; CG9249; CG5044; Akt1; CG6005; CG10217; CG11089; Mtl; Fer2LCH; aralar1; Npc2h; Npc2g; krz; Eb1; Rho1; scb; CG30010; Jra; Pten; glo; rl; bun; grh; Ect4; Imp
GO:0048638	1.35973e-10	2.39473	72.3399	118	221	regulation of developmental growth	6.36644e-10	SkpA; RpL22; Ns3; usp; sgg; Fas2; CG3527; Rbm13; Dsor1; CG7246; Rae1; gbb; HSPC300; CG3608; Eps-15; Pdk1; trio; Rabex-5; Rac1; alpha-Spec; CG11583; Src64B; dsh; dlg1; bif; lic; CG8939; caz; Rok; beta-Spec; Cdc42; Tao; gig; Rab8; trc; Capr; TSG101; dlp; Abp1; RhoGAP68F; simj; dally; Arp3; sfl; LanA; vito; Prpk; ed; cpb; dbe; ebi; kis; CG7338; Cdk12; RpL35A; Liprin-alpha; Tor; p38b; Lar; RtGEF; Ras…
GO:0044772	1.46835e-10	2.79012	52.0454	91	159	mitotic cell cycle phase transition	6.8523e-10	SkpA; Rbf; wds; Zw10; sgg; mei-9; Mcm3; PpV; Moe; Dsor1; Egfr; Rae1; CycB; slik; E(bx); Psf1; ida; Rcd5; RpII215; Aven; REG; rept; CSN1b; brm; vih; Pop2; Mcm7; MED4; mad2; lwr; CSN3; Rpb8; Chro; Rheb; Rga; PEK; Mnn1; CSN8; alien; Cks30A; me31B; Cdk1; mre11; Top2; Cdc23; E2f2; alphaTub84B; RpA-70; M1BP; alphaTub85E; Kap-alpha3; Ras85D; tws; pont; Tctp; MBD-R2; pic; RpII15; mor; CSN5; MED17; Cdk2; …
GO:0044257	1.567e-10	2.24485	84.1237	133	257	cellular protein catabolic process	7.26472e-10	SkpA; Edem1; wds; Zw10; sgg; CG4165; CG3016; Ubi-p5E; Moe; Prosalpha3; Vps20; snama; CG3356; Rpn8; slik; CG30421; CG32479; CG9153; CG12082; ida; Rpt3; CG2247; Usp7; CkIalpha; REG; shtd; CG8184; Prosalpha4; CG7288; Rpn1; l(3)76BDr; Rpn12; Prosbeta6; Prosbeta2; Vps36; vih; Rpt4R; Ube3a; Ufd1-like; Uch-L5; CG5087; Cbl; Uba2; Ubp64E; mad2; Rpt6; morgue; RpL40; Su(dx); Uch; Rpn10; Chro; Rpn5; Prosbeta…
GO:0051603	1.567e-10	2.24485	84.1237	133	257	proteolysis involved in cellular protein catabolic process	7.26472e-10	SkpA; Edem1; wds; Zw10; sgg; CG4165; CG3016; Ubi-p5E; Moe; Prosalpha3; Vps20; snama; CG3356; Rpn8; slik; CG30421; CG32479; CG9153; CG12082; ida; Rpt3; CG2247; Usp7; CkIalpha; REG; shtd; CG8184; Prosalpha4; CG7288; Rpn1; l(3)76BDr; Rpn12; Prosbeta6; Prosbeta2; Vps36; vih; Rpt4R; Ube3a; Ufd1-like; Uch-L5; CG5087; Cbl; Uba2; Ubp64E; mad2; Rpt6; morgue; RpL40; Su(dx); Uch; Rpn10; Chro; Rpn5; Prosbeta…
GO:1902850	1.76726e-10	6.73375	16.6938	39	51	microtubule cytoskeleton organization involved in mitosis	8.12932e-10	mip130; CG7033; Prosalpha3; Non2; pav; Klp10A; Tcp-1zeta; Gl; Klp67A; mad2; mst; gammaTub23C; Prosbeta7; borr; aurB; CG5525; Tcp-1eta; pont; mgr; Prosalpha2; Pp1-87B; Cctgamma; Ns1; Non3; T-cp1; Rpt2; Vps33B; ncd; BubR1; Mob4; tum; Cct5; Cam; Non1; Mad1; Incenp; chb; vtd; cmet
GO:0050657	1.77074e-10	4.84129	22.9131	49	70	nucleic acid transport	8.12932e-10	sta; Cbp80; RpS28b; mago; tud; CG10320; thoc5; Nxt1; thoc7; sbr; Dlic; CG8184; Chc; U2af50; Arl1; AGO2; Gl; thoc6; Cog3; Trn-SR; tho2; Hpr1; Hel25E; Nup107; Nup160; VhaSFD; BicD; swm; sqd; ldlCp; CG4572; Srp72; CG5382; AP-2mu; Nup133; Rab7; ncd; Sap-r; Vha16-1; Nup75; Dcr-2; JhI-1; tsu; Phax; Dmn; CG14749; Bet3; lt; egl
GO:0050658	1.77074e-10	4.84129	22.9131	49	70	RNA transport	8.12932e-10	sta; Cbp80; RpS28b; mago; tud; CG10320; thoc5; Nxt1; thoc7; sbr; Dlic; CG8184; Chc; U2af50; Arl1; AGO2; Gl; thoc6; Cog3; Trn-SR; tho2; Hpr1; Hel25E; Nup107; Nup160; VhaSFD; BicD; swm; sqd; ldlCp; CG4572; Srp72; CG5382; AP-2mu; Nup133; Rab7; ncd; Sap-r; Vha16-1; Nup75; Dcr-2; JhI-1; tsu; Phax; Dmn; CG14749; Bet3; lt; egl
GO:0043632	1.79438e-10	2.24578	83.4691	132	255	modification-dependent macromolecule catabolic process	8.1949e-10	SkpA; Edem1; wds; Zw10; sgg; CG4165; CG3016; Ubi-p5E; Moe; Prosalpha3; Vps20; snama; CG3356; Rpn8; slik; CG30421; CG32479; CG9153; CG12082; ida; Rpt3; CG2247; Usp7; CkIalpha; shtd; CG8184; Prosalpha4; CG7288; Rpn1; l(3)76BDr; Rpn12; Prosbeta6; Prosbeta2; Vps36; vih; Rpt4R; Ube3a; Ufd1-like; Uch-L5; CG5087; Cbl; Uba2; Ubp64E; mad2; Rpt6; morgue; RpL40; Su(dx); Uch; Rpn10; Chro; Rpn5; Prosbeta7; Ub…
GO:0051225	1.79662e-10	4.15342	27.4957	56	84	spindle assembly	8.1949e-10	mip130; CG7033; Prosalpha3; Non2; pav; Klp10A; Tcp-1zeta; Grip84; polo; mop; Gl; Klp67A; pbl; mad2; mst; gammaTub23C; Prosbeta7; ifc; mts; Cks30A; borr; pelo; aurB; CG5525; dia; Tcp-1eta; pont; mgr; Prosalpha2; Pp1-87B; Cctgamma; Ns1; Non3; Synd; T-cp1; Rpt2; Vps33B; wdb; ncd; BubR1; Eb1; Mob4; Lis-1; SRPK; tum; Cct5; Cam; Mtor; Non1; Incenp; chb; larp; vtd; Skeletor; mud; cmet
GO:0044818	1.81826e-10	4.71615	23.5677	50	72	mitotic G2/M transition checkpoint	8.26696e-10	SkpA; Rbf; wds; mei-9; Mcm3; Dsor1; E(bx); Rcd5; RpII215; rept; CSN1b; Pop2; Mcm7; MED4; lwr; CSN3; Rpb8; Rga; CSN8; alien; me31B; Cdk1; mre11; Top2; RpA-70; M1BP; Kap-alpha3; pont; Tctp; MBD-R2; pic; RpII15; CSN5; MED17; CSN6; BRWD3; Ald; Spt5; Rcd1; Rpb5; Su(var)2-10; CSN7; Cul4; Cul1; CSN4; eIF4G; gfzf; tefu; Not1; Rpb4
GO:0044773	1.86719e-10	4.40093	25.5317	53	78	mitotic DNA damage checkpoint	8.46219e-10	SkpA; Rbf; wds; mei-9; Mcm3; Dsor1; E(bx); Rcd5; RpII215; rept; CSN1b; Pop2; Mcm7; MED4; lwr; CSN3; Rpb8; Rga; Mnn1; CSN8; alien; me31B; Cdk1; mre11; spel1; Top2; RpA-70; M1BP; Kap-alpha3; pont; Tctp; MBD-R2; pic; RpII15; CSN5; MED17; Fancd2; CSN6; BRWD3; Ald; Spt5; Rcd1; Rpb5; Su(var)2-10; CSN7; Cul4; Cul1; CSN4; eIF4G; gfzf; tefu; Not1; Rpb4
GO:0000075	1.96759e-10	3.48303	35.0243	67	107	cell cycle checkpoint	8.88874e-10	CG9578; SkpA; Rbf; wds; Zw10; mei-9; Mcm3; Dsor1; E(bx); Rcd5; RfC4; RpII215; rept; CSN1b; Pop2; Mcm7; MED4; mad2; lwr; CSN3; Rpb8; Chro; Rga; Mnn1; CSN8; alien; me31B; Cdk1; aurB; mre11; spel1; Top2; alphaTub84B; RpA-70; M1BP; alphaTub85E; Kap-alpha3; pont; Tctp; MBD-R2; pic; timeout; RpII15; CSN5; MED17; Fancd2; CSN6; BRWD3; Ald; Bub3; BubR1; Spt5; Lis-1; Rcd1; Mtor; Rpb5; Su(var)2-10; Mad1; CS…
GO:0007015	2.00275e-10	2.91658	47.1355	84	144	actin filament organization	9.01875e-10	DAAM; Actn; cib; ctp; spoon; sn; mys; cpa; Dcp-1; tsr; gek; Rac1; Girdin; Hsp83; Src64B; dyl; dsh; Ran; mew; Gbeta13F; Rok; if; Arpc3B; Vav; Cdc42; Lasp; Smn; flr; RhoGAP68F; Arp3; Rac2; ed; Arpc5; cpb; Gel; Arpc4; chic; mts; Btk29A; Pvr; SCAR; Ced-12; Arpc1; ck; CG5869; Mhc; Arpc2; ik2; Fs(2)Ket; dia; Mical; SelR; sals; twf; Atx2; gish; Pak3; GckIII; RhoGAP92B; Rab1; jar; gro; Mtl; ALiX; WASp; c…
GO:0051049	2.94019e-10	2.37883	70.7032	115	216	regulation of transport	1.31632e-09	dor; sgg; CHOp24; GAA1; Crag; Ppt1; Moe; Act57B; Nup214; gbb; Snap29; CG3608; pav; CG1657; Gtp-bp; prtp; p24-1; Lsd-2; opm; vap; Stim; Chc; U2af50; Fur2; fu; car; Tao; Vps60; ms(3)72Dt; Arl1; RhoGAP68F; Trn; Rcc1; Sec5; Rab5; Sec24CD; crq; CG7338; Cdk12; Arf79F; Sec23; noi; RpL35A; Sec61alpha; Ent2; Tango1; CG7214; Rbsn-5; PIG-U; numb; FKBP59; Npc1a; porin; l(2)gd1; CaBP1; cact; Cas; BicD; Nak; s…
GO:0071826	2.9417e-10	5.57116	19.3125	43	59	ribonucleoprotein complex subunit organization	1.31632e-09	sta; CG3198; tud; LSm1; DCP1; eIF6; pUf68; CG11583; Rbp1-like; U2af50; eIF-2alpha; pcm; CG7564; Smn; AGO2; Prp31; eIF-2beta; RpS17; mxt; mTerf3; CG7338; Ddx1; x16; r2d2; Srp54; me31B; Ge-1; FBXO11; Rbp1; B52; Patr-1; snRNP-U1-C; LSm3; CG7006; stau; icln; HPS4; Dcr-2; AGO1; csul; SC35; RpL5; CG13185
GO:0000910	3.01222e-10	3.33721	36.6609	69	112	cytokinesis	1.33957e-09	Rab35; Ocrl; Zw10; Act5C; sqh; Moe; flw; Act57B; CycB; tsr; slik; zip; fwd; alphaCOP; kst; pav; Rop; shi; Rok; Sep4; polo; alphaSnap; Syx13; eIF-4E; Klp67A; pbl; Rint1; Sep1; Sec5; Cog3; Drp1; fbl; Sec8; chic; borr; aurB; l(2)gd1; Syx5; fws; nesd; bru; dia; alphaTub84D; CG10068; hyd; Bruce; Caf1; Sep2; Synd; Rab11; Syx1A; CycB3; Exo84; Tl; ALiX; Cog7; cindr; Act42A; pAbp; Bap55; Rho1; Arf51F; tum…
GO:0043297	3.01261e-10	9.4609	12.7659	32	39	apical junction assembly	1.33957e-09	pck; bou; Nrg; shg; Patj; kst; dlg1; par-6; Tsf2; Nrx-IV; crim; Galphai; sinu; cold; l(2)gl; Cont; nrv2; wol; crok; Gli; GckIII; crb; mesh; kune; cora; Lac; Galphao; Atpalpha; vari; arm; moody; aPKC
GO:0007267	3.24897e-10	1.76556	170.211	237	520	cell-cell signaling	1.4391e-09	CkIIalpha; Vap-33A; CHOp24; XRCC1; Mcm6; nonC; cm; CG32732; UbcE2H; Upf2; CG12065; Ppt1; AP-1gamma; Psf3; mago; Synj; Dcp-1; gbb; Galphas; or; gammaSnap1; Snap29; CG3608; CG4692; Letm1; Eps-15; mri; E(bx); trio; Psf1; alpha-Spec; dlt; nSyb; scramb2; Rop; RfC4; Syx17; nAChRbeta1; sesB; dsh; dlg1; p24-1; Tomosyn; comt; opm; HDAC6; shi; Chc; mbt; SMC3; X11L; beta-Spec; CG8142; Cdc42; AP-1-2beta; gig…
GO:0043603	3.2568e-10	1.55419	296.888	383	907	cellular amide metabolic process	1.4391e-09	RpL22; RpL36; CG14786; sta; mRpL16; eIF2B-epsilon; mRpL14; CG8636; tko; eIF2B-beta; CG10802; tyf; mRpL33; mRpL30; RpL35; CG5941; Spt6; RpL7A; schlank; RpL17; NA; Gclc; RpS6; CG2263; RpS28b; Aats-lys; mRpL54; RpL29; CG10306; mRpS29; RpS16; bonsai; RpL23; RpS24; eIF2B-delta; mRpL43; l(2)efl; eIF-5A; RpL12; RpL39; Not11; Phm; eIF6; CG3376; mRpS17; RpL19; key; Aats-tyr-m; GstE12; mRpL17; mRpL46; RpL2…
GO:0000165	3.40686e-10	2.99039	43.8622	79	134	MAPK cascade	1.49605e-09	SkpA; Pgd; sgg; Rala; RhoGAP5A; MAPk-Ak2; CG3198; slpr; Dsor1; flw; cpa; mago; Sac1; Rac1; Cdc37; msn; Strip; CG12082; Src64B; lic; ben; mbt; Cdc42; CG14184; Mkp3; CG10754; msk; syd; Rac2; Fnta; cpb; ebi; Cdk12; ksr; betaggt-I; PDZ-GEF; smt3; Mnn1; Cka; Btk29A; Pvr; raw; bsk; ics; p38b; eIF4AIII; Mkk4; M1BP; Ras85D; Pp1-87B; lkb1; Sur-8; ATPsyn-d; Pk92B; p38a; XNP; Mtl; ALiX; CG4849; alph; Mob4; …
GO:0023014	3.40686e-10	2.99039	43.8622	79	134	signal transduction by protein phosphorylation	1.49605e-09	SkpA; Pgd; sgg; Rala; RhoGAP5A; MAPk-Ak2; CG3198; slpr; Dsor1; flw; cpa; mago; Sac1; Rac1; Cdc37; msn; Strip; CG12082; Src64B; lic; ben; mbt; Cdc42; CG14184; Mkp3; CG10754; msk; syd; Rac2; Fnta; cpb; ebi; Cdk12; ksr; betaggt-I; PDZ-GEF; smt3; Mnn1; Cka; Btk29A; Pvr; raw; bsk; ics; p38b; eIF4AIII; Mkk4; M1BP; Ras85D; Pp1-87B; lkb1; Sur-8; ATPsyn-d; Pk92B; p38a; XNP; Mtl; ALiX; CG4849; alph; Mob4; …
GO:0023057	3.4582e-10	2.17232	88.0517	137	269	negative regulation of signaling	1.5139e-09	Roc1a; SkpA; AMPKalpha; dor; pn; sgg; Rala; Fas2; ct; flw; cpa; Egfr; Vps20; Dcp-1; MAN1; Eps-15; E(bx); Sac1; msn; Atg2; CG12082; ImpL2; Rpd3; dsh; CkIalpha; pdgy; vap; sl; fu; Ulp1; car; gig; asf1; MESR6; Mkp3; Chmp1; Vps60; dlp; Atg1; dally; Cbl; Atg18a; UbcE2M; pbl; Dd; ed; Su(dx); cpb; dock; ebi; lwr; l(2)gl; pzg; Pez; Mnn1; Akap200; raw; numb; Pka-C1; Utx; bsk; Stam; l(2)gd1; crol; ics; TM9…
GO:0000281	3.57838e-10	5.02075	21.2764	46	65	mitotic cytokinesis	1.56168e-09	Rab35; Ocrl; Act5C; sqh; Act57B; CycB; tsr; slik; zip; kst; pav; Rop; shi; Rok; Sep4; alphaSnap; Syx13; pbl; Sep1; Sec5; Drp1; chic; borr; aurB; l(2)gd1; Syx5; bru; dia; alphaTub84D; CG10068; Caf1; Sep2; Synd; Syx1A; CycB3; Tl; ALiX; Act42A; Bap55; Rho1; tum; shrb; stmA; pnut; Incenp; Nipped-A
GO:0051298	3.5931e-10	4.00972	27.823	56	85	centrosome duplication	1.56327e-09	SkpA; crn; RpL35; RpL7A; RpL17; RpS6; CG7033; RpL19; Cdc5; Klp61F; RpL23A; RpL8; RpL28; Rcd5; pav; Klp10A; Hsc70-3; Tcp-1zeta; Nup153; RpS4; RpL10Ab; nudE; RpL14; RpL27A; gammaTub23C; RpL13A; mts; emb; RpL13; RpL7; RpL9; RpL24; RpL30; skap; alphaTub85E; tws; RpL3; NA; CHORD; mask; RpL27; RpL4; ncd; RpL6; RpL21; RpL11; betaTub56D; RpL18A; RpS23; Rcd1; tum; cnn; Cam; RpL10; betaTub97EF
GO:0021700	3.7297e-10	2.35295	71.6852	116	219	developmental maturation	1.61773e-09	CkIIalpha; Roc1a; SkpA; usp; Vap-33A; Torsin; Nrg; Moe; flw; shg; sktl; mago; tud; Egfr; Dcp-1; DCP1; Sac1; alpha-Spec; Hsp83; Rop; CkIIbeta; lic; ben; Chc; Rok; par-6; ftz-f1; Lasp; blue; Nrx-IV; Dronc; Rac2; ple; ndl; kis; l(2)gl; Cont; lost; Scox; chic; Hrb27C; SA; Rbsn-5; Pka-C1; Stam; Ge-1; Rab6; p38b; BicD; vls; ik2; E2f2; eIF4AIII; Mkk4; ird1; Ras85D; Mical; poly; lkb1; sqd; eff; ea; asun;…
GO:0007030	3.82988e-10	4.74131	22.5858	48	69	Golgi organization	1.6561e-09	Zw10; p115; Ost48; Tango5; GM130; Snap29; fwd; Klp61F; ecd; Tango4; comt; Tango2; Gmap; mbt; Grasp65; CG13049; Arl1; Use1; Rint1; CG10075; Sec24CD; Sec23; Pi4KIIalpha; CG31650; Tango1; wol; CG7456; SCAR; CG9008; Syx5; CG13284; CoIV; CG16817; eca; Abi; ldlCp; rumi; Golgin84; Osbp; Cog7; hppy; Tango7; EfTuM; garz; TER94; RhoGAP1A; Sec16; CG4041
GO:0044774	3.87219e-10	4.23115	25.859	53	79	mitotic DNA integrity checkpoint	1.66929e-09	SkpA; Rbf; wds; mei-9; Mcm3; Dsor1; E(bx); Rcd5; RpII215; rept; CSN1b; Pop2; Mcm7; MED4; lwr; CSN3; Rpb8; Rga; Mnn1; CSN8; alien; me31B; Cdk1; mre11; spel1; Top2; RpA-70; M1BP; Kap-alpha3; pont; Tctp; MBD-R2; pic; RpII15; CSN5; MED17; Fancd2; CSN6; BRWD3; Ald; Spt5; Rcd1; Rpb5; Su(var)2-10; CSN7; Cul4; Cul1; CSN4; eIF4G; gfzf; tefu; Not1; Rpb4
GO:0034504	3.90206e-10	4.62068	23.2404	49	71	protein localization to nucleus	1.67197e-09	sgg; Act57B; Nup214; pav; hop; Nup93-1; exd; Stim; Nup153; fu; Nup205; Kap-alpha1; msk; Trn; Rcc1; Ntf-2; Trn-SR; lwr; noi; Karybeta3; Lam; smt3; CG7214; Nup107; Nup160; cact; Cas; Fs(2)Ket; Kap-alpha3; Ras85D; Su(fu); mbo; Akt1; Sec13; Nup98-96; Nup358; pll; dco; Gp210; Nup75; Diap2; Nup54; Cam; Mtor; Nup50; Cul4; Nup154; Parp; Parg
GO:0051236	3.90206e-10	4.62068	23.2404	49	71	establishment of RNA localization	1.67197e-09	sta; Cbp80; RpS28b; mago; tud; CG10320; thoc5; Nxt1; thoc7; sbr; Dlic; CG8184; Chc; U2af50; Arl1; AGO2; Gl; thoc6; Cog3; Trn-SR; tho2; Hpr1; Hel25E; Nup107; Nup160; VhaSFD; BicD; swm; sqd; ldlCp; CG4572; Srp72; CG5382; AP-2mu; Nup133; Rab7; ncd; Sap-r; Vha16-1; Nup75; Dcr-2; JhI-1; tsu; Phax; Dmn; CG14749; Bet3; lt; egl
GO:0010972	3.94601e-10	4.40964	24.5497	51	75	negative regulation of G2/M transition of mitotic cell cycle	1.68062e-09	SkpA; Rbf; wds; mei-9; Mcm3; Dsor1; E(bx); Rcd5; RpII215; Aven; rept; CSN1b; Pop2; Mcm7; MED4; lwr; CSN3; Rpb8; Rga; CSN8; alien; me31B; Cdk1; mre11; Top2; RpA-70; M1BP; Kap-alpha3; pont; Tctp; MBD-R2; pic; RpII15; CSN5; MED17; CSN6; BRWD3; Ald; Spt5; Rcd1; Rpb5; Su(var)2-10; CSN7; Cul4; Cul1; CSN4; eIF4G; gfzf; tefu; Not1; Rpb4
GO:1902750	3.94601e-10	4.40964	24.5497	51	75	negative regulation of cell cycle G2/M phase transition	1.68062e-09	SkpA; Rbf; wds; mei-9; Mcm3; Dsor1; E(bx); Rcd5; RpII215; Aven; rept; CSN1b; Pop2; Mcm7; MED4; lwr; CSN3; Rpb8; Rga; CSN8; alien; me31B; Cdk1; mre11; Top2; RpA-70; M1BP; Kap-alpha3; pont; Tctp; MBD-R2; pic; RpII15; CSN5; MED17; CSN6; BRWD3; Ald; Spt5; Rcd1; Rpb5; Su(var)2-10; CSN7; Cul4; Cul1; CSN4; eIF4G; gfzf; tefu; Not1; Rpb4
GO:0007098	4.4155e-10	3.5004	33.3876	64	102	centrosome cycle	1.87493e-09	SkpA; crn; RpL35; RpL7A; RpL17; RpS6; CG7033; RpL19; Cdc5; Klp61F; RpL23A; RpL8; Hsp83; RpL28; Rcd5; pav; Klp10A; Hsc70-3; Tcp-1zeta; Nup153; Gl; RpS4; RpL10Ab; nudE; Klp67A; RpL14; RpL27A; gammaTub23C; RpL13A; Ubc6; mts; emb; RpL13; RpL7; RpL9; RpL24; RpL30; skap; alphaTub85E; tws; RpL3; NA; CHORD; mask; RpL27; RpL4; ncd; RpL6; RpL21; RpL11; betaTub56D; RpL18A; Khc; Lis-1; RpS23; Rcd1; tum; cnn;…
GO:0045930	4.8306e-10	3.23514	37.6429	70	115	negative regulation of mitotic cell cycle	2.04505e-09	SkpA; Rbf; wds; Zw10; mei-9; Mcm3; Dsor1; Egfr; E(bx); Rcd5; RpII215; Aven; rept; CSN1b; brm; RecQ5; Pop2; Mcm7; MED4; mad2; lwr; CSN3; Rpb8; Chro; Rga; Mnn1; CSN8; alien; me31B; Cdk1; mre11; spel1; Syx5; Top2; E2f2; alphaTub84B; RpA-70; M1BP; alphaTub85E; Kap-alpha3; pont; Tctp; MBD-R2; pic; RpII15; mor; CSN5; MED17; Fancd2; CSN6; BRWD3; Ald; Bub3; BubR1; Spt5; Lis-1; Rcd1; Mtor; Rpb5; Su(var)2-…
GO:0044249	5.07332e-10	1.33724	792.793	921	2422	cellular biosynthetic process	2.1414e-09	CkIIalpha; cin; CG3038; l(1)1Bi; SkpA; Rbf; RpL22; RpL36; CG14786; dor; sta; MED18; mRpL16; mip130; usp; CG4406; eIF2B-epsilon; csw; pn; CG3071; mRpL14; CG8636; tko; sgg; eIF2B-beta; CG10802; tyf; GlcAT-I; CG2982; mRpL33; mRpL30; rb; Cdk7; Mcm3; RpL35; CG4078; CG3011; GAA1; CG5941; Spt6; Marf; RpL7A; schlank; Mcm6; COQ7; RpL17; cm; ct; NELF-B; NA; Gclc; fs(1)h; RpS6; CG10932; CG11190; CG2263; Spt…
GO:0006511	5.30927e-10	2.21132	82.1598	129	251	ubiquitin-dependent protein catabolic process	2.23432e-09	SkpA; Edem1; wds; Zw10; sgg; CG4165; CG3016; Ubi-p5E; Moe; Prosalpha3; Vps20; snama; CG3356; Rpn8; slik; CG30421; CG32479; CG9153; CG12082; ida; Rpt3; CG2247; Usp7; CkIalpha; shtd; CG8184; Prosalpha4; CG7288; Rpn1; l(3)76BDr; Rpn12; Prosbeta6; Prosbeta2; Vps36; vih; Rpt4R; Ube3a; Ufd1-like; Uch-L5; CG5087; Cbl; Ubp64E; mad2; Rpt6; morgue; RpL40; Su(dx); Uch; Rpn10; Chro; Rpn5; Prosbeta7; Ubc6; Rp…
GO:0006914	5.65662e-10	3.07923	40.5889	74	124	autophagy	2.37343e-09	dor; ctp; Atg5; Atg8a; Rae1; Dcp-1; Sesn; Snap29; Atg2; Ubi-p63E; Ccz1; Syx17; sesB; Atg101; car; gig; HLH106; NA; Atg3; CG6878; Atg1; Sod; Dronc; SH3PX1; Hsp67Bc; Atg18a; lqf; mio; Atg4a; Rheb; Atg17; PEK; Ubc6; Sec61alpha; mts; Rack1; Utx; bsk; Tor; Acn; Pax; CG11975; Vps16A; ird1; RagA-B; Ras85D; Bruce; foxo; GlyS; FK506-bp1; PP2A-B'; Vps39; Pi3K92E; Atg6; wdb; Vha100-1; Atg16; nero; Atg7; Sod…
GO:0044839	5.72397e-10	3.6658	30.769	60	94	cell cycle G2/M phase transition	2.39458e-09	SkpA; Rbf; wds; mei-9; Mcm3; Dsor1; Egfr; CycB; E(bx); Rcd5; RpII215; Aven; rept; CSN1b; Pop2; bol; dally; Mcm7; MED4; lwr; CSN3; Rpb8; Rga; PEK; CSN8; alien; pelo; me31B; Cdk1; mre11; Top2; RpA-70; M1BP; Kap-alpha3; pont; Tctp; MBD-R2; pic; RpII15; CSN5; MED17; Cdk2; CSN6; BRWD3; CycB3; Ald; Spt5; Rcd1; Rpb5; Su(var)2-10; CSN7; Cul4; Cul1; CSN4; eIF4G; eIF4G2; gfzf; tefu; Not1; Rpb4
GO:0043900	5.82765e-10	2.83356	47.1355	83	144	regulation of multi-organism process	2.4257e-09	CHOp24; Cbp80; Spt6; Hexo2; mago; key; Cypl; Rop; dlg1; PGRP-SA; p24-1; opm; NA; TSG101; Lasp; AGO2; blue; ptip; Atg1; Est-6; Atg18a; Ntf-2; Rm62; Sec61alpha; Hrb27C; Rack1; Pka-C1; me31B; TM9SF4; cact; mdy; CG10333; CG9318; ird1; p24-2; eca; Bruce; GILT1; Cbp20; MED25; mira; Rab11; Pebp1; GILT2; SPE; Rab7; Pli; p38a; Syx1A; puf; bai; Tl; spz; spn-F; Gprk2; Ars2; DMAP1; Atg7; imd; stau; Dcr-2; Kh…
GO:0007416	5.83265e-10	2.74621	50.0815	87	153	synapse assembly	2.4257e-09	SkpA; sgg; Fas2; Top3beta; Rae1; gbb; HSPC300; Eps-15; Pdk1; trio; Rac1; Gad1; Src64B; sesB; dlg1; ben; caz; par-6; Cdc42; gig; Rab8; Liprin-beta; Abp1; caps; Atg1; RhoGAP68F; simj; Arp3; LanA; Elp3; Got2; cpb; kis; Ten-m; Rheb; stai; Liprin-alpha; Tor; Gli; Lar; Dap160; Mical; Arfip; Nsf2; Akt1; Pak3; Patr-1; RhoGAP92B; Pi3K92E; Synd; Rab11; CASK; Nrx-1; spas; atl; Tl; WASp; Cul5; Med; Cul2; Tbc…
GO:0032509	5.92145e-10	Inf	6.21927	19	19	endosome transport via multivesicular body sorting pathway	2.45541e-09	Vps20; CG7967; kst; Ccz1; CG7192; Chmp1; Vps60; TSG101; CG10103; Mon1; Vps37B; lsn; Rab7; Vps2; shrb; Vps25; Vps28; AnxB9; Hrs
GO:1901576	5.96653e-10	1.3347	798.03	926	2438	organic substance biosynthetic process	2.46686e-09	CkIIalpha; cin; CG3038; l(1)1Bi; SkpA; Rbf; RpL22; RpL36; CG14786; dor; sta; MED18; mRpL16; mip130; usp; CG4406; eIF2B-epsilon; csw; pn; CG3071; mRpL14; CG8636; tko; sgg; eIF2B-beta; CG10802; tyf; GlcAT-I; CG2982; mRpL33; mRpL30; rb; Cdk7; Mcm3; RpL35; CG4078; CG3011; GAA1; CG5941; Spt6; Marf; RpL7A; schlank; Mcm6; COQ7; RpL17; cm; ct; NELF-B; NA; Gclc; fs(1)h; RpS6; CG10932; CG11190; CG2263; Spt…
GO:0000077	7.02862e-10	3.8756	28.1504	56	86	DNA damage checkpoint	2.89751e-09	CG9578; SkpA; Rbf; wds; mei-9; Mcm3; Dsor1; E(bx); Rcd5; RfC4; RpII215; rept; CSN1b; Pop2; Mcm7; MED4; lwr; CSN3; Rpb8; Rga; Mnn1; CSN8; alien; me31B; Cdk1; mre11; spel1; Top2; RpA-70; M1BP; Kap-alpha3; pont; Tctp; MBD-R2; pic; timeout; RpII15; CSN5; MED17; Fancd2; CSN6; BRWD3; Ald; Spt5; Rcd1; Rpb5; Su(var)2-10; CSN7; Cul4; Cul1; CSN4; eIF4G; gfzf; tefu; Not1; Rpb4
GO:0007163	7.48187e-10	2.43453	63.8293	105	195	establishment or maintenance of cell polarity	3.0754e-09	alpha-Cat; AMPKalpha; csw; sgg; Rala; ctp; spoon; sn; Moe; ric8a; shg; sktl; mago; Egfr; tsr; slik; zip; Rac1; Cct1; Patj; R; dsh; hop; Ran; Klp10A; dlg1; fw; Tomosyn; Chc; Rok; X11L; par-6; Cdc42; TSG101; Gl; blue; Nrx-IV; prc; Cbl; msk; Rac2; Galphai; Klp64D; gkt; Rab5; Sec24CD; l(2)gl; Sec23; Cont; abs; mts; Rbsn-5; Pka-C1; Rab6; BicD; Sgt1; Ras85D; tws; poly; yrt; rin; lkb1; sqd; gish; sds22;…
GO:0044744	8.06693e-10	4.76914	21.6038	46	66	protein targeting to nucleus	3.29672e-09	sgg; Act57B; Nup214; pav; hop; Nup93-1; exd; Stim; Nup153; fu; Nup205; Kap-alpha1; msk; Trn; Rcc1; Ntf-2; Trn-SR; lwr; noi; Karybeta3; smt3; CG7214; Nup107; Nup160; cact; Cas; Fs(2)Ket; Kap-alpha3; Ras85D; Su(fu); mbo; Akt1; Sec13; Nup98-96; Nup358; pll; dco; Gp210; Nup75; Diap2; Nup54; Cam; Mtor; Nup50; Cul4; Nup154
GO:0051170	8.06693e-10	4.76914	21.6038	46	66	nuclear import	3.29672e-09	sgg; Act57B; CG10320; Nup214; pav; hop; Nup93-1; exd; Stim; Nup153; fu; Nup205; Kap-alpha1; msk; Trn; Rcc1; Ntf-2; Trn-SR; lwr; noi; Karybeta3; smt3; CG7214; Nup107; Nup160; cact; Cas; Fs(2)Ket; Kap-alpha3; Ras85D; Su(fu); mbo; Akt1; Sec13; Nup98-96; Nup358; pll; dco; Gp210; Nup75; Diap2; Nup54; Cam; Mtor; Nup50; Cul4
GO:0035152	8.18983e-10	4.23275	24.8771	51	76	regulation of tube architecture, open tracheal system	3.33729e-09	DAAM; pck; deltaCOP; Fas2; sqh; bou; mys; Nrg; Moe; Zpr1; shg; Egfr; zip; dsh; mew; shi; Chc; if; serp; Mkp3; Nrx-IV; crim; sinu; CG3921; Sec24CD; cold; Sec23; mmy; nrv2; crok; Gli; ik2; Mtp; knk; wat; kune; cora; Rho1; conv; shot; garz; Lac; stan; Syb; Atpalpha; vari; uif; grh; verm; rhea; awd
GO:0019439	9.22945e-10	3.48134	32.4056	62	99	aromatic compound catabolic process	3.75013e-09	pn; Top3beta; nonC; Upf2; Not11; Upf3; DCP1; Pym; Dat; cN-IIIB; v; Upf1; Rcd-1; pcm; Adgf-A; Pop2; pix; RNaseX25; Hn; CG17224; CG2091; Rga; DhpD; CG8891; Rat1; CG8353; pelo; piwi; hgo; Smg5; l(2)35Df; CG8665; GstZ2; GstZ1; RnpS1; Ho; Not10; ry; Adgf-D; sqd; Patr-1; DNaseII; WRNexo; tst; twin; Dis3; CG6330; Mesh1; CG11337; Not3; veil; Dg; AGO1; CG8525; CG8777; PAN2; Pabp2; gw; Not1; cu; Rrp6; Ude
GO:0044723	9.62577e-10	2.40431	64.8113	106	198	single-organism carbohydrate metabolic process	3.89995e-09	CG3038; CG13369; l(1)G0334; Ost48; Hex-A; Treh; Gale; oxt; pgant6; Hexo1; FucT6; Gapdh2; GalNAc-T2; Pfrx; Zw; Ugt; Pgm; CG17029; CG17027; Arl1; Tollo; Atg1; CG10688; Galk; sgl; sfl; ImpL3; CG10467; CG1518; Tps1; Pgk; GlyP; Eno; CG9391; Arf79F; CG3792; pgant5; CG9536; Galt; CG5171; CG5177; Rack1; wol; CG8475; CG9466; CG5731; LM408; CG5322; CG33303; Pgant35A; CG6453; CG10166; Gld; Arl2; alpha-Man-I…
GO:0034329	9.77157e-10	6.38527	16.0392	37	49	cell junction assembly	3.93647e-09	pck; bou; Nrg; shg; Patj; R; kst; Src64B; dlg1; Rok; par-6; Tsf2; Nrx-IV; crim; Galphai; sinu; cold; l(2)gl; Cont; PDZ-GEF; nrv2; wol; crok; Gli; GckIII; crb; mesh; kune; cora; Lac; Galphao; Atpalpha; Pten; vari; arm; moody; aPKC
GO:0090307	9.77157e-10	6.38527	16.0392	37	49	mitotic spindle assembly	3.93647e-09	mip130; CG7033; Prosalpha3; Non2; pav; Klp10A; Tcp-1zeta; Gl; Klp67A; mad2; mst; gammaTub23C; Prosbeta7; borr; aurB; CG5525; Tcp-1eta; pont; mgr; Prosalpha2; Pp1-87B; Cctgamma; Ns1; Non3; T-cp1; Rpt2; Vps33B; ncd; BubR1; Mob4; tum; Cct5; Cam; Non1; Incenp; vtd; cmet
GO:0061640	1.19051e-09	3.26606	35.3516	66	108	cytoskeleton-dependent cytokinesis	4.78232e-09	Rab35; Ocrl; Zw10; Act5C; sqh; Moe; flw; Act57B; CycB; tsr; slik; zip; fwd; alphaCOP; kst; pav; Rop; shi; Rok; Sep4; polo; alphaSnap; Syx13; eIF-4E; Klp67A; pbl; Rint1; Sep1; Sec5; Cog3; Drp1; Sec8; chic; borr; aurB; l(2)gd1; Syx5; fws; nesd; bru; dia; alphaTub84D; CG10068; hyd; Caf1; Sep2; Synd; Rab11; Syx1A; CycB3; Exo84; Tl; ALiX; Cog7; Act42A; pAbp; Bap55; Rho1; Arf51F; tum; shrb; stmA; pnut;…
GO:0016236	1.25176e-09	5.77041	17.3485	39	53	macroautophagy	5.01411e-09	dor; Atg5; Atg8a; Dcp-1; Snap29; Atg2; Syx17; Atg101; car; HLH106; NA; CG6878; Atg1; Sod; SH3PX1; Atg18a; Atg17; Rack1; Tor; CG11975; Vps16A; ird1; Ras85D; Bruce; foxo; GlyS; FK506-bp1; Vps39; Vha100-1; Atg16; Atg7; Sod2; Atg9; Vps25; Vps28; Vamp7; lt; rl; mv
GO:0031347	1.27776e-09	3.07593	38.9522	71	119	regulation of defense response	5.10382e-09	CG32795; Rala; Crag; Tim10; Nxt1; key; E(bx); HBS1; PGRP-SA; betaCOP; Hayan; Ulp1; dome; Spn77Ba; PDCD-5; brm; GNBP3; GstO2; Atg18a; GlyP; Hr78; Rm62; CG2051; mtd; CG13994; Spn27A; LanB1; Spn28Dc; Etl1; me31B; CYLD; TM9SF4; p38b; cact; CG10333; CG9318; Sp7; unc-45; MED6; GILT1; mor; GILT2; SPE; Atg6; Pp1alpha-96A; puf; Tl; spz; CanA1; faf; krz; DMAP1; Atg7; imd; Dcr-2; casp; Diap2; Su(var)2-10; M…
GO:1901361	1.29699e-09	3.2946	34.697	65	106	organic cyclic compound catabolic process	5.16603e-09	pn; Top3beta; nonC; Upf2; Not11; Upf3; DCP1; Pym; Dat; cN-IIIB; v; Upf1; Rcd-1; pcm; Adgf-A; Pop2; pix; RNaseX25; Hn; CG17224; CG2091; Rga; DhpD; CG8891; Rat1; CG8353; pelo; piwi; hgo; b; Smg5; l(2)35Df; CG8665; pyd3; GstZ2; GstZ1; RnpS1; Ho; Not10; ry; Adgf-D; sqd; Patr-1; DNaseII; WRNexo; tst; twin; Dis3; CG6330; Mesh1; CG11337; Not3; veil; Dg; AGO1; CG8525; dare; CG8777; PAN2; Pabp2; gw; Not1;…
GO:0006120	1.35395e-09	9.9967	11.4565	29	35	mitochondrial electron transport, NADH to ubiquinone	5.37775e-09	CG32230; CG3621; CG3446; CG3192; CG18624; CG10320; NDUFA8; mtacp1; CG5548; CG9172; CG5703; l(3)neo18; CG6463; Pdsw; CG12400; CG3214; CG11455; CG6020; CG9140; CG9306; l(2)35Di; ND23; ND42; CG2014; CG7598; CG12859; CG7712; CG1970; mt:ND4
GO:0007067	1.56009e-09	2.12309	86.4151	133	264	mitotic nuclear division	6.1619e-09	CkIIalpha; SkpA; mip130; Zw10; CG8636; sgg; ttm50; Cdk7; NELF-B; Moe; CG7033; Prosalpha3; CycB; pita; CG11414; slik; Klp61F; Non2; ida; pav; RfC4; Dlic; Klp10A; shtd; Tcp-1zeta; Rok; SMC3; TH1; Grip84; polo; l(3)72Ab; RecQ5; Gl; endos; Syx13; vih; nudE; SH3PX1; eIF-4E; Klp67A; Nelf-E; lark; Rcc1; mad2; mst; Dim1; gammaTub23C; Rab5; CG3436; fbl; Rpn10; Chro; noi; Prosbeta7; eIF-4a; SA; mts; Cks30A…
GO:0051960	1.56009e-09	2.12309	86.4151	133	264	regulation of nervous system development	6.1619e-09	SkpA; sdk; DAAM; csw; sgg; lva; Fas2; Top3beta; Ppt1; Rae1; GM130; babos; gbb; HSPC300; Eps-15; trio; Rac1; alpha-Spec; Rpd3; Src64B; Dlic; dsh; dlg1; bif; CG3560; caz; mbt; Rok; beta-Spec; RhoGAPp190; Cdc42; gig; polo; Rab8; trc; MED11; brm; Abp1; RhoGAP68F; simj; fry; Arp3; pbl; Rac2; MED4; LanA; Rcc1; Elp3; ed; cpb; kis; l(2)gl; Sec23; MED31; chic; PDZ-GEF; Liprin-alpha; mts; numb; Lar; CoIV; …
GO:0090150	1.64476e-09	7.0375	14.4025	34	44	establishment of protein localization to membrane	6.46024e-09	TRAM; GAA1; Crag; Tim10; Gtp-bp; Nup93-1; CG6404; Srp68; CG4942; SrpRbeta; Srp9; Sec63; Srp19; Srp54k; Sec5; Sec24CD; Sec23; Sec61alpha; PIG-U; CG5885; Trp1; CG31229; Srp72; Rab11; Sar1; CG10420; CG5447; cora; Sec6; Sec61beta; boca; Nup154; Srp14; PIG-S
GO:0090174	1.64476e-09	7.0375	14.4025	34	44	organelle membrane fusion	6.46024e-09	Sec22; dor; p115; Snap29; Vti1; nSyb; Syx17; comt; car; alphaSnap; NA; Syx13; SH3PX1; Membrin; Sec5; Rab5; CG2023; Rbsn-5; Vps16A; Vps45; Vps39; Gos28; Rab11; Syx1A; atl; Vps33B; Vha100-1; Vps16B; CDase; TER94; Vps25; Vps28; Vamp7; lt
GO:0006606	1.73718e-09	4.66431	21.2764	45	65	protein import into nucleus	6.78556e-09	sgg; Act57B; Nup214; pav; hop; Nup93-1; exd; Stim; Nup153; fu; Nup205; Kap-alpha1; msk; Trn; Rcc1; Ntf-2; Trn-SR; lwr; noi; Karybeta3; smt3; CG7214; Nup107; Nup160; cact; Cas; Fs(2)Ket; Kap-alpha3; Ras85D; Su(fu); mbo; Akt1; Sec13; Nup98-96; Nup358; pll; dco; Gp210; Nup75; Diap2; Nup54; Cam; Mtor; Nup50; Cul4
GO:1902593	1.73718e-09	4.66431	21.2764	45	65	single-organism nuclear import	6.78556e-09	sgg; Act57B; Nup214; pav; hop; Nup93-1; exd; Stim; Nup153; fu; Nup205; Kap-alpha1; msk; Trn; Rcc1; Ntf-2; Trn-SR; lwr; noi; Karybeta3; smt3; CG7214; Nup107; Nup160; cact; Cas; Fs(2)Ket; Kap-alpha3; Ras85D; Su(fu); mbo; Akt1; Sec13; Nup98-96; Nup358; pll; dco; Gp210; Nup75; Diap2; Nup54; Cam; Mtor; Nup50; Cul4
GO:0007568	1.78628e-09	2.55599	54.6641	92	167	aging	6.95811e-09	dor; Edem1; rb; cm; mys; Trxr-1; Ppt1; Atg8a; Egfr; levy; Sesn; Thiolase; miple2; fwd; Cct1; ImpL2; Rpd3; sesB; Jafrac1; Clic; g; CG9172; car; gig; Cat; Indy; ms(3)72Dt; Eip71CD; l(3)neo18; Sod; Dronc; Hsp27; Hsp26; Cbs; Thor; GlyP; NLaz; CG2789; kis; Lam; Mnn1; Btk29A; Trx-2; Mtpalpha; CYLD; Tor; p38b; VhaSFD; hk; alpha-Est7; Prat; SdhC; ry; lkb1; foxo; kuk; Prx3; Dlc90F; ATPsyn-d; Naam; Sirt2; …
GO:0010948	1.8764e-09	3.16487	36.3336	67	111	negative regulation of cell cycle process	7.2891e-09	SkpA; Rbf; wds; Zw10; mei-9; Mcm3; Dsor1; Egfr; E(bx); Rcd5; RpII215; Aven; Mi-2; rept; CSN1b; brm; Pop2; Mcm7; MED4; mad2; lwr; CSN3; Rpb8; Chro; Rga; Mnn1; CSN8; alien; me31B; Cdk1; mre11; spel1; Top2; E2f2; alphaTub84B; RpA-70; M1BP; alphaTub85E; Kap-alpha3; pont; Tctp; MBD-R2; pic; RpII15; mor; CSN5; MED17; CSN6; BRWD3; Ald; Bub3; BubR1; Spt5; Rcd1; Mtor; Rpb5; Su(var)2-10; Mad1; CSN7; Cul4; …
GO:0051726	1.9967e-09	1.91529	115.875	169	354	regulation of cell cycle	7.73518e-09	SkpA; Rbf; Ocrl; wds; Zw10; CG8636; sgg; mei-9; Cdk7; Mcm3; p115; Moe; Dsor1; flw; CG30291; Egfr; Rae1; gammaSnap1; slik; zip; fwd; E(bx); pUf68; Rac1; Psf1; Klp61F; ida; Rcd5; Ran; dlg1; RpII215; Aven; REG; ben; CG8128; Grip84; Alr; gig; Mi-2; rept; CSN1b; Capr; Int6; brm; RecQ5; endos; Klc; vih; Pop2; Ubc4; bol; dally; Mcm7; MED4; Rcc1; mad2; Pp4-19C; gammaTub23C; mio; ebi; lwr; l(2)gl; fbl; mT…
GO:0002682	2.0329e-09	2.35259	65.4659	106	200	regulation of immune system process	7.85387e-09	sgg; CG32795; Rala; Spt6; Crag; Egfr; Tim10; l(2)06496; Nxt1; Nurf-38; key; E(bx); Rac1; HBS1; hop; PGRP-SA; betaCOP; Hayan; Ulp1; dome; Spn77Ba; fz2; Cat; PDCD-5; brm; ptip; GNBP3; GstO2; Atg18a; Rac2; msl-3; Ntf-2; GlyP; lwr; crq; Hr78; Arf79F; Rm62; CG2051; mtd; Lam; CG13994; Spn27A; LanB1; Spn28Dc; Pvr; Etl1; me31B; CYLD; p38b; cact; CG10333; Sp7; unc-45; ird1; Ras85D; MED6; mfas; foxo; Akt1;…
GO:0019395	2.0759e-09	16.5318	8.8379	24	27	fatty acid oxidation	7.99815e-09	CG9577; CG3699; CG4586; Acox57D-p; Acox57D-d; Thiolase; CG9149; Mfe2; CG12262; Mtpalpha; yip2; CG17544; CG9319; CG1041; CG4860; AdipoR; CG12428; CG11208; CG6543; Egm; Etf-QO; CG5009; CG9527; CG14688
GO:0072329	2.31899e-09	11.1645	10.4746	27	32	monocarboxylic acid catabolic process	8.91049e-09	CG9577; CG3699; Spat; CG4586; Acox57D-p; Acox57D-d; Thiolase; CG9149; pdgy; Mfe2; CG12262; Mtpalpha; yip2; CG17544; CG9319; CG1041; CG4860; Ssadh; CG12428; CG3267; CG11208; CG6543; Egm; Etf-QO; CG5009; CG9527; CG14688
GO:0022603	2.44492e-09	2.10659	86.0877	132	263	regulation of anatomical structure morphogenesis	9.36888e-09	DAAM; Pgam5; csw; Rala; lva; Fas2; MAPk-Ak2; Rab18; Marf; mys; slpr; Ppt1; NA; Egfr; GM130; babos; Cdk9; HSPC300; zip; fwd; CG7028; trio; Rac1; alpha-Spec; R; msn; Hsp83; Rpd3; dyl; Dlic; dsh; hop; Ran; bif; mbt; Rok; AnxB11; if; par-6; RhoGAPp190; Vav; Cdc42; trc; Dronc; fry; pbl; Rac2; Elp3; morgue; ed; Drp1; Sec24CD; l(2)gl; Pitslre; Ten-m; Hem; Arf79F; Sec23; CG12007; Arpc4; PDZ-GEF; Liprin-a…
GO:0009967	2.80276e-09	2.10643	85.4331	131	261	positive regulation of signal transduction	1.07111e-08	CkIIalpha; CG14812; Pgd; CHOp24; CG3198; slpr; e(r); Dsor1; mago; Swim; Nurf-38; E(bx); CG32479; trio; Cdc37; msn; Jafrac2; Strip; CG14977; ImpL2; lic; ben; opm; shi; Chc; mbt; CG9099; Tao; CG14184; NA; brm; dlp; mop; CG10960; CG10754; nst; CG8108; Dronc; Taf2; dally; Arp3; lqf; Klp64D; Prpk; wap; Fnta; CG31694; ebi; Ipk2; spen; pzg; Cdk12; Rheb; ksr; CG9769; betaggt-I; eIF-3p40; smt3; Mnn1; mts;…
GO:1901987	2.91225e-09	2.71899	46.8082	81	143	regulation of cell cycle phase transition	1.10697e-08	SkpA; Rbf; wds; Zw10; sgg; mei-9; Mcm3; Dsor1; Egfr; Rae1; E(bx); Psf1; ida; Rcd5; RpII215; Aven; REG; rept; CSN1b; brm; vih; Pop2; Mcm7; MED4; mad2; lwr; CSN3; Rpb8; Chro; Rga; PEK; Mnn1; CSN8; alien; Cks30A; me31B; Cdk1; mre11; Top2; Cdc23; E2f2; alphaTub84B; RpA-70; M1BP; alphaTub85E; Kap-alpha3; pont; Tctp; MBD-R2; pic; RpII15; mor; CSN5; MED17; CSN6; Cdc16; Rpn9; BRWD3; CycB3; Sld5; Ald; Bub…
GO:1901990	2.91225e-09	2.71899	46.8082	81	143	regulation of mitotic cell cycle phase transition	1.10697e-08	SkpA; Rbf; wds; Zw10; sgg; mei-9; Mcm3; Dsor1; Egfr; Rae1; E(bx); Psf1; ida; Rcd5; RpII215; Aven; REG; rept; CSN1b; brm; vih; Pop2; Mcm7; MED4; mad2; lwr; CSN3; Rpb8; Chro; Rga; PEK; Mnn1; CSN8; alien; Cks30A; me31B; Cdk1; mre11; Top2; Cdc23; E2f2; alphaTub84B; RpA-70; M1BP; alphaTub85E; Kap-alpha3; pont; Tctp; MBD-R2; pic; RpII15; mor; CSN5; MED17; CSN6; Cdc16; Rpn9; BRWD3; CycB3; Sld5; Ald; Bub…
GO:0007292	2.9449e-09	1.56891	249.098	324	761	female gamete generation	1.11638e-08	alpha-Cat; CkIIalpha; Rbf; dor; mip130; usp; csw; sgg; Rala; Femcoat; ctp; snf; spoon; sqh; wuho; Mcm6; Inx2; ct; sn; mys; slpr; Cp36; Moe; Dsor1; Yp1; Yp2; flw; ras; cpa; shg; sktl; mago; tud; Egfr; Vps20; vir; Dcp-1; gbb; tsr; DCP1; Zfrp8; zip; Pdk1; Rac1; Cct1; alpha-Spec; R; ecd; msn; Hsp83; kst; Rop; Rpd3; Src64B; sesB; Dlic; dsh; hop; dlg1; Evi5; CkIIbeta; lic; Yp3; Pdcd4; Top1; shi; Chc; s…
GO:0048477	2.97544e-09	1.57211	246.479	321	753	oogenesis	1.12266e-08	alpha-Cat; CkIIalpha; Rbf; dor; mip130; usp; csw; sgg; Rala; Femcoat; ctp; snf; spoon; sqh; wuho; Mcm6; Inx2; ct; sn; mys; slpr; Cp36; Moe; Dsor1; Yp2; flw; ras; cpa; shg; sktl; mago; tud; Egfr; Vps20; vir; Dcp-1; gbb; tsr; DCP1; Zfrp8; zip; Pdk1; Rac1; Cct1; alpha-Spec; R; ecd; msn; Hsp83; kst; Rop; Rpd3; Src64B; sesB; Dlic; dsh; hop; dlg1; Evi5; CkIIbeta; lic; Pdcd4; Top1; shi; Chc; sl; kat80; …
GO:0010389	2.98529e-09	3.79208	26.841	53	82	regulation of G2/M transition of mitotic cell cycle	1.12266e-08	SkpA; Rbf; wds; mei-9; Mcm3; Dsor1; E(bx); Rcd5; RpII215; Aven; rept; CSN1b; Pop2; Mcm7; MED4; lwr; CSN3; Rpb8; Rga; PEK; CSN8; alien; me31B; Cdk1; mre11; Top2; RpA-70; M1BP; Kap-alpha3; pont; Tctp; MBD-R2; pic; RpII15; CSN5; MED17; CSN6; BRWD3; CycB3; Ald; Spt5; Rcd1; Rpb5; Su(var)2-10; CSN7; Cul4; Cul1; CSN4; eIF4G; gfzf; tefu; Not1; Rpb4
GO:1902749	2.98529e-09	3.79208	26.841	53	82	regulation of cell cycle G2/M phase transition	1.12266e-08	SkpA; Rbf; wds; mei-9; Mcm3; Dsor1; E(bx); Rcd5; RpII215; Aven; rept; CSN1b; Pop2; Mcm7; MED4; lwr; CSN3; Rpb8; Rga; PEK; CSN8; alien; me31B; Cdk1; mre11; Top2; RpA-70; M1BP; Kap-alpha3; pont; Tctp; MBD-R2; pic; RpII15; CSN5; MED17; CSN6; BRWD3; CycB3; Ald; Spt5; Rcd1; Rpb5; Su(var)2-10; CSN7; Cul4; Cul1; CSN4; eIF4G; gfzf; tefu; Not1; Rpb4
GO:0010564	3.67266e-09	2.30108	66.7753	107	204	regulation of cell cycle process	1.37749e-08	SkpA; Rbf; Ocrl; wds; Zw10; sgg; mei-9; Mcm3; Moe; Dsor1; flw; Egfr; Rae1; slik; fwd; E(bx); Psf1; Klp61F; ida; Rcd5; RpII215; Aven; REG; Mi-2; rept; CSN1b; brm; endos; vih; Pop2; bol; Mcm7; MED4; mad2; mio; lwr; fbl; CSN3; Rpb8; Chro; Sec8; Rga; PEK; Mnn1; CSN8; alien; Cks30A; me31B; Cdk1; aurB; mre11; spel1; fws; Top2; Cdc23; bru; E2f2; alphaTub84B; RpA-70; M1BP; skap; alphaTub85E; Kap-alpha3; …
GO:0019991	3.76864e-09	12.9171	9.49256	25	29	septate junction assembly	1.40975e-08	pck; bou; Nrg; dlg1; Tsf2; Nrx-IV; crim; Galphai; sinu; cold; l(2)gl; Cont; nrv2; wol; crok; Gli; GckIII; mesh; kune; cora; Lac; Galphao; Atpalpha; vari; moody
GO:0042592	3.92356e-09	1.98546	99.5082	148	304	homeostatic process	1.46383e-08	CG3719; Rbcn-3B; CG4199; VhaAC39-1; CG4078; Ctr1A; mys; sws; Trxr-1; fh; Hex-A; shg; Sara; Egfr; Fkbp14; CG5554; ABCB7; Patj; CG8993; CG12082; Ubi-p63E; Syx17; sesB; prtp; mew; Jafrac1; rdgB; CG14407; CG9911; if; Tsf1; Tao; CG14184; HLH106; NA; Mkp3; CG6852; ftz-f1; CG7430; CG7484; Su(P); CG5027; brm; Pdi; endos; JIL-1; CG3408; CG5804; Dbi; Txl; Ppat-Dpck; CG15456; CG8814; Prx6005; Snapin; Pgk; N…
GO:0060341	4.02257e-09	2.489	55.3187	92	169	regulation of cellular localization	1.49682e-08	east; sgg; CHOp24; GAA1; Crag; Ppt1; Act57B; mago; Nup214; gbb; Snap29; CG3608; pav; Rop; Gtp-bp; p24-1; opm; Stim; U2af50; fu; Mi-2; Lasp; Arl1; blue; RhoGAP68F; Trn; Rcc1; Sec5; Sec24CD; CG7338; Cdk12; Sec23; noi; RpL35A; Hrb27C; CG7214; PIG-U; Pka-C1; cact; Cas; BicD; swm; Fs(2)Ket; eca; Kap-alpha3; AP-1mu; Tango9; Snx3; Su(fu); mbo; Akt1; gish; Dlc90F; Gos28; Dys; RhoGAP92B; mira; Rab11; Rab1…
GO:0032787	4.53665e-09	2.67551	47.1355	81	144	monocarboxylic acid metabolic process	1.68368e-08	CG9577; CG3699; l(1)G0334; Spat; CG4586; Pdp; CG10932; Hex-A; Gip; Acox57D-p; Acox57D-d; Thiolase; CG9149; mtacp1; Gad1; pdgy; Gapdh2; Mfe2; CG9914; scu; CG6891; Pfrx; HLH106; CG7433; beg; Baldspot; Pex3; CG14130; CG12262; ImpL3; Pgk; Eno; CG12170; CG31523; CG9804; CG5261; Aldh; Mtpalpha; yip2; CG6746; bgm; CG4500; CG33090; CG17544; CG9319; CG1041; CG4860; Mpc1; CG4335; AdipoR; CG6178; Ssadh; Ald…
GO:0000086	4.65056e-09	3.522	29.1323	56	89	G2/M transition of mitotic cell cycle	1.71694e-08	SkpA; Rbf; wds; mei-9; Mcm3; Dsor1; Egfr; CycB; E(bx); Rcd5; RpII215; Aven; rept; CSN1b; Pop2; Mcm7; MED4; lwr; CSN3; Rpb8; Rga; PEK; CSN8; alien; me31B; Cdk1; mre11; Top2; RpA-70; M1BP; Kap-alpha3; pont; Tctp; MBD-R2; pic; RpII15; CSN5; MED17; Cdk2; CSN6; BRWD3; CycB3; Ald; Spt5; Rcd1; Rpb5; Su(var)2-10; CSN7; Cul4; Cul1; CSN4; eIF4G; gfzf; tefu; Not1; Rpb4
GO:0031570	4.65056e-09	3.522	29.1323	56	89	DNA integrity checkpoint	1.71694e-08	CG9578; SkpA; Rbf; wds; mei-9; Mcm3; Dsor1; E(bx); Rcd5; RfC4; RpII215; rept; CSN1b; Pop2; Mcm7; MED4; lwr; CSN3; Rpb8; Rga; Mnn1; CSN8; alien; me31B; Cdk1; mre11; spel1; Top2; RpA-70; M1BP; Kap-alpha3; pont; Tctp; MBD-R2; pic; timeout; RpII15; CSN5; MED17; Fancd2; CSN6; BRWD3; Ald; Spt5; Rcd1; Rpb5; Su(var)2-10; CSN7; Cul4; Cul1; CSN4; eIF4G; gfzf; tefu; Not1; Rpb4
GO:0008652	4.77667e-09	8.56758	11.7839	29	36	cellular amino acid biosynthetic process	1.75891e-08	CG3011; Gad1; CG2543; CG1673; CG11134; CG9674; aay; CG8005; Cbs; Got2; Gs1; P5CDh1; CG7470; CG12173; CG12264; b; CG1315; Nmdmc; pug; Dhfr; P5cr-2; P5cr; CG11899; CG11334; Got1; SelD; CG9510; CG32068; CG17486
GO:0007155	4.96051e-09	2.2021	73.3219	115	224	cell adhesion	1.82186e-08	alpha-Cat; Vinc; Fas2; RhoGAP5A; MAPk-Ak2; Rab18; mys; Nrg; NA; flw; shg; Egfr; Cdk9; CG3829; emp; CG2736; CG7028; Rac1; alpha-Spec; R; Girdin; Fit1; ImpL2; Src64B; dyl; Con; Ran; fw; mew; Jafrac1; Flo2; Gbeta13F; Stim; mbt; AnxB11; if; par-6; Vav; parvin; Mkp3; Cat; caps; Nrx-IV; prc; LanB2; pbl; LanA; sinu; ed; Sec24CD; crq; Pitslre; Ilk; Ten-m; Hem; Arf79F; Sec23; CG12007; Cont; Arpc4; PDZ-GEF…
GO:0031175	4.98513e-09	1.6477	192.47	258	588	neuron projection development	1.82616e-08	CkIIalpha; Appl; AMPKalpha; CG11448; DAAM; rush; usp; Vinc; lva; Fas2; Ptp4E; ct; sn; mys; Nrg; Ppt1; Moe; ras; shg; HmgD; GM130; babos; tsr; Chi; betaTub60D; uzip; E(bx); trio; Sac1; Rac1; alpha-Spec; alphaCOP; MEP-1; msn; Strip; CG12082; prominin-like; Rpd3; Src64B; Con; Dlic; dsh; Ran; Gtp-bp; Ptp10D; bif; mew; Bap60; CG2691; ben; Rok; if; beta-Spec; RhoGAPp190; Vav; Ulp1; Cdc42; alphaSnap; Mi…
GO:0050776	5.23276e-09	2.77313	43.5349	76	133	regulation of immune response	1.91192e-08	CG32795; Rala; Spt6; Crag; Tim10; Nxt1; key; E(bx); Rac1; HBS1; PGRP-SA; betaCOP; Hayan; dome; Spn77Ba; PDCD-5; brm; ptip; GNBP3; GstO2; Rac2; Ntf-2; GlyP; crq; Hr78; CG2051; mtd; Lam; CG13994; Spn27A; LanB1; Spn28Dc; Etl1; CYLD; p38b; cact; Sp7; unc-45; ird1; MED6; mor; MED25; psidin; Pebp1; SPE; Pli; p38a; Atg6; Pp1alpha-96A; puf; Tl; spz; CanA1; Gprk2; faf; DMAP1; imd; casp; Diap2; Jra; Su(var…
GO:0006518	5.37048e-09	1.5136	288.378	367	881	peptide metabolic process	1.95718e-08	RpL22; RpL36; CG14786; sta; mRpL16; eIF2B-epsilon; mRpL14; CG8636; tko; eIF2B-beta; CG10802; tyf; mRpL33; mRpL30; RpL35; CG5941; Spt6; RpL7A; RpL17; NA; Gclc; RpS6; CG2263; RpS28b; Aats-lys; mRpL54; RpL29; CG10306; mRpS29; RpS16; bonsai; RpL23; RpS24; eIF2B-delta; mRpL43; l(2)efl; eIF-5A; RpL12; RpL39; Not11; Phm; eIF6; mRpS17; RpL19; key; Aats-tyr-m; GstE12; mRpL17; mRpL46; RpL23A; HBS1; mRpL23;…
GO:1901605	5.56428e-09	3.24795	32.733	61	100	alpha-amino acid metabolic process	2.0226e-08	arg; CG17896; CG3011; Trh; CG32281; Gad1; v; CG2543; CG11134; CG7860; Oat; CG7430; CG9674; l(3)72Dr; CG8745; CG10361; aay; CG6638; CG8005; Hn; Cbs; Got2; Gs1; CG4825; ppl; P5CDh1; CG7470; CG12173; CG9547; CG10399; CG6415; hgo; CG12264; dmGlut; CG8665; CG1315; Nmdmc; GstZ2; GstZ1; CG3999; pug; ry; yellow-f2; Dhfr; P5cr-2; P5cr; CG11899; PH4alphaEFB; CG9698; CG11334; CG2118; CG3267; Got1; SelD; 14-…
GO:0006887	5.63904e-09	3.66524	27.1684	53	83	exocytosis	2.04451e-08	Rab35; Vap-33A; rb; cm; p115; gammaSnap1; nSyb; Rop; Syx17; Tomosyn; comt; g; Chc; X11L; car; alphaSnap; Sec3; Syx13; Nrx-IV; Exo70; Syx16; Sec5; Snapin; Slh; l(2)gl; Csp; jagn; Sec8; Rab6; Syx5; BicD; Vps45; gammaSnap2; Nsf2; ldlCp; Rab11; Sec15; CASK; Rab7; Sec10; Syx1A; jar; Esyt2; Vps33B; Exo84; ALiX; CDase; Sec6; Syb; stmA; Hrs; Caps; Unc-13-4B
GO:0010259	5.90553e-09	2.50447	53.3547	89	163	multicellular organismal aging	2.13566e-08	dor; Edem1; rb; cm; mys; Trxr-1; Ppt1; Atg8a; Egfr; levy; Sesn; Thiolase; miple2; fwd; Cct1; ImpL2; Rpd3; sesB; Jafrac1; Clic; g; CG9172; car; gig; Cat; Indy; ms(3)72Dt; Eip71CD; l(3)neo18; Sod; Dronc; Hsp27; Hsp26; Cbs; Thor; GlyP; NLaz; CG2789; kis; Mnn1; Btk29A; Trx-2; Mtpalpha; CYLD; Tor; p38b; VhaSFD; hk; alpha-Est7; Prat; SdhC; ry; lkb1; foxo; Prx3; Dlc90F; ATPsyn-d; Naam; Sirt2; p38a; Hsp6…
GO:0022406	6.02127e-09	10.7484	10.1472	26	31	membrane docking	2.17196e-08	Pex5; p115; nSyb; Rop; Syx17; X11L; car; Sec3; Syx13; Nrx-IV; Exo70; Syx16; Sec5; Slh; Pex14; Sec8; Syx5; Vps45; Sec15; CASK; Sec10; Syx1A; Vps33B; Exo84; Sec6; Syb
GO:0044270	6.06907e-09	3.27835	32.0783	60	98	cellular nitrogen compound catabolic process	2.18363e-08	pn; Top3beta; nonC; Upf2; Not11; Upf3; DCP1; Pym; Dat; cN-IIIB; v; Upf1; Rcd-1; pcm; Adgf-A; Pop2; pix; RNaseX25; CG17224; CG2091; Rga; DhpD; CG8891; Rat1; CG8353; pelo; piwi; b; Smg5; l(2)35Df; CG8665; pyd3; RnpS1; Ho; Not10; ry; Adgf-D; sqd; Patr-1; DNaseII; WRNexo; tst; twin; Dis3; CG6330; Mesh1; CG11337; Not3; veil; Dg; AGO1; CG8525; CG8777; PAN2; Pabp2; gw; Not1; cu; Rrp6; Ude
GO:0006629	6.21272e-09	1.81914	128.968	183	394	lipid metabolic process	2.22964e-08	CG9577; Cyp4g1; CG3699; AMPKalpha; Ocrl; usp; CG4406; Vap-33A; GAA1; CG3160; CG5966; Marf; schlank; CG4586; sws; CG10932; CG11190; fh; sktl; Acox57D-p; Acox57D-d; Synj; Thiolase; CG3376; fwd; Sac1; CG9149; mtacp1; Cct1; ecd; CG12006; Sc2; Cyp4g15; CG42237; CG15743; rdgB; CG14411; Lsd-2; pdgy; CG9503; CG9509; CG9512; Pis; CG8239; Mfe2; eas; sl; CG9914; CG9784; CG5162; scu; CG6891; gig; HLH106; nes…
GO:0030041	6.23044e-09	7.75612	12.4385	30	38	actin filament polymerization	2.23034e-08	DAAM; spoon; cpa; tsr; Arpc3B; Cdc42; flr; Arp3; Arpc5; cpb; Gel; Arpc4; chic; Btk29A; SCAR; Arpc1; CG5869; Arpc2; dia; SelR; sals; twf; Atx2; RhoGAP92B; ALiX; WASp; LamC; wash; Arpc3A; nwk
GO:0019725	6.51061e-09	2.56421	50.4088	85	154	cellular homeostasis	2.32475e-08	CG3719; Rbcn-3B; CG4199; VhaAC39-1; Ctr1A; Trxr-1; fh; Hex-A; Fkbp14; CG5554; ABCB7; CG8993; CG12082; Ubi-p63E; Syx17; sesB; prtp; Jafrac1; CG14407; CG9911; Tsf1; NA; CG6852; CG7430; CG7484; Su(P); CG5027; Pdi; CG3408; CG5804; Dbi; Txl; CG15456; CG8814; Prx6005; Pgk; AIF; ebi; Trxr-2; SPoCk; Itp-r83A; CG3887; Scox; CG4495; Rack1; CG8498; Trx-2; Vha68-2; Vha68-1; CG6523; CG9302; Rab14; Syx5; CaBP1…
GO:0044283	6.5882e-09	2.79762	42.2255	74	129	small molecule biosynthetic process	2.34653e-08	usp; CG3011; Marf; COQ7; CG10932; fh; mtacp1; Cct1; ecd; Gad1; CG2543; CG2453; CG1673; CG11134; CG6891; HLH106; CG32174; beg; CG9674; Baldspot; Pex3; CG10688; aay; Fdxh; CG8005; Cbs; Npc2a; Got2; Ipk2; Gs1; P5CDh1; CG7470; CG12170; CG12173; CG31523; CG9804; CG7277; Npc1a; CG12264; CG6746; b; CG9249; CG1315; sgll; CG2846; Nmdmc; pug; foxo; Npc2b; Dhfr; P5cr-2; P5cr; CG4335; woc; CG11899; sro; CG11…
GO:0002252	7.19802e-09	3.09152	35.0243	64	107	immune effector process	2.55729e-08	Spt6; Nrg; key; Rac1; Vago; hop; PGRP-SA; Flo2; Vav; Cdc42; AGO2; Gl; ptip; Shc; Atg18a; Rac2; LanA; Ntf-2; DIP1; crq; Rm62; Spn27A; r2d2; Ostgamma; me31B; TM9SF4; cact; CG10333; dia; ird1; alpha-Man-II; RhoL; poly; alpha-Man-IIb; MED25; SPE; puf; Tl; spz; alpha-Man-Ib; Gprk2; Eb1; DMAP1; Atg7; imd; Dcr-2; casp; Diap2; Cdk5; Myd88; PPO2; Rel; Stat92E; OstDelta; Pten; Mt2; Parp; Dredd; alpha-Man-I…
GO:0051094	7.43234e-09	2.3446	61.2107	99	187	positive regulation of developmental process	2.63392e-08	RpL22; DAAM; Ns3; Pgam5; lva; CG3527; Marf; Top3beta; Rbm13; Dsor1; fh; CG7246; GM130; gbb; CG3608; Pdk1; trio; Rac1; CG11583; dsh; dlg1; lic; Pdcd4; ben; CG8939; caz; mbt; trc; Lasp; Abp1; Atg1; RhoGAP68F; simj; Dronc; Fdxh; Arp3; pbl; vito; Prpk; morgue; Drp1; Sec24CD; cpb; dbe; ebi; kis; CG7338; Cdk12; Sec23; RpL35A; chic; Tor; p38b; Mcm10; Dap160; Ras85D; Tctp; Arfip; RpL24-like; Akt1; Pak3; …
GO:0045927	7.93843e-09	2.94375	37.9703	68	116	positive regulation of growth	2.80624e-08	RpL22; Ns3; CG3527; Rbm13; Dsor1; CG7246; gbb; CG3608; Pdk1; trio; Rac1; CG11583; dsh; dlg1; lic; CG8939; caz; sl; trc; Abp1; RhoGAP68F; simj; eIF-4E; Arp3; vito; Prpk; wap; cpb; dbe; ebi; kis; CG7338; Cdk12; Rheb; RpL35A; Tor; p38b; RagA-B; Ras85D; Tctp; Arfip; RpL24-like; Akt1; Ns1; RhoGAP92B; Pi3K92E; Synd; tsl; spas; puf; CG7006; dco; Med; Ns2; shot; stan; JhI-1; Rs1; Hcf; CG5033; PIP4K; Wbp2…
GO:0050807	9.26046e-09	2.83795	40.2616	71	123	regulation of synapse organization	3.25729e-08	SkpA; sgg; Fas2; Top3beta; Act57B; Rae1; gbb; HSPC300; Eps-15; trio; Rac1; alpha-Spec; Src64B; dlg1; CG9172; caz; beta-Spec; Cdc42; gig; Rab8; Abp1; Atg1; RhoGAP68F; Sod; simj; Arp3; LanA; Thor; cpb; kis; Tor; p38b; RtGEF; Arfip; Nsf2; Sra-1; Atx2; Akt1; Pak3; Patr-1; RhoGAP92B; Pi3K92E; Synd; Rab11; CASK; Nrx-1; spas; atl; WASp; Cul5; Med; Cul2; Tbce; Mob4; ena; Nup75; unc-104; Cdk5; scb; stan; …
GO:0051124	9.26046e-09	2.83795	40.2616	71	123	synaptic growth at neuromuscular junction	3.25729e-08	SkpA; sgg; Fas2; Rae1; gbb; HSPC300; Eps-15; Pdk1; trio; Src64B; sesB; dlg1; ben; caz; Cdc42; gig; Rab8; Liprin-beta; Abp1; Atg1; RhoGAP68F; simj; Arp3; LanA; Elp3; cpb; kis; Ten-m; Rheb; stai; Liprin-alpha; Tor; Lar; Dap160; Arfip; Nsf2; Akt1; Patr-1; RhoGAP92B; Pi3K92E; Synd; Rab11; CASK; Nrx-1; spas; atl; WASp; Cul5; Med; Cul2; Tbce; Mob4; ena; unc-104; Cdk5; scb; Galphao; Jra; Acsl; Mob2; Atp…
GO:0000904	9.3207e-09	1.67439	172.83	234	528	cell morphogenesis involved in differentiation	3.27034e-08	CkIIalpha; AMPKalpha; DAAM; usp; sgg; lva; Fas2; Ptp4E; sqh; ct; mys; Nrg; Ppt1; Moe; ras; shg; HmgD; GM130; babos; Vps20; tsr; Chi; betaTub60D; uzip; E(bx); trio; Sac1; Rac1; Patj; alpha-Spec; R; MEP-1; msn; Strip; Rpd3; Src64B; dyl; Dlic; dsh; hop; Gtp-bp; Ptp10D; bif; mew; Bap60; ben; Rok; if; beta-Spec; RhoGAPp190; Vav; Ulp1; Cdc42; Mi-2; trc; asf1; fz2; MED11; ftz-f1; Vps60; Dab; Nrt; CG9705…
GO:0006904	9.99242e-09	12.3973	9.16523	24	28	vesicle docking involved in exocytosis	3.48012e-08	p115; nSyb; Rop; Syx17; X11L; car; Sec3; Syx13; Nrx-IV; Exo70; Syx16; Sec5; Slh; Sec8; Syx5; Vps45; Sec15; CASK; Sec10; Syx1A; Vps33B; Exo84; Sec6; Syb
GO:0034440	9.99242e-09	12.3973	9.16523	24	28	lipid oxidation	3.48012e-08	CG9577; CG3699; CG4586; Acox57D-p; Acox57D-d; Thiolase; CG9149; Mfe2; CG12262; Mtpalpha; yip2; CG17544; CG9319; CG1041; CG4860; AdipoR; CG12428; CG11208; CG6543; Egm; Etf-QO; CG5009; CG9527; CG14688
GO:0048278	9.99242e-09	12.3973	9.16523	24	28	vesicle docking	3.48012e-08	p115; nSyb; Rop; Syx17; X11L; car; Sec3; Syx13; Nrx-IV; Exo70; Syx16; Sec5; Slh; Sec8; Syx5; Vps45; Sec15; CASK; Sec10; Syx1A; Vps33B; Exo84; Sec6; Syb
GO:0031647	1.07406e-08	6.20728	14.4025	33	44	regulation of protein stability	3.73149e-08	CkIIalpha; SkpA; ric8a; sicily; fw; fu; CSN1b; Ubp64E; CSN3; CSN8; alien; Cand1; Mhc; Nedd8; Sgt1; tws; Snx3; eff; CSN5; CSN6; crb; puf; krz; Bap170; Mlf; Sin3A; Fbl6; trsn; 14-3-3zeta; CSN7; CSN4; Pten; Ccs
GO:0007528	1.11512e-08	2.53341	50.0815	84	153	neuromuscular junction development	3.86464e-08	SkpA; sgg; Vap-33A; Fas2; Act57B; Rae1; gbb; Galphas; HSPC300; Eps-15; Pdk1; trio; Gad1; Src64B; sesB; dlg1; ben; caz; Cdc42; gig; Rab8; Smn; dlp; Liprin-beta; Abp1; Atg1; RhoGAP68F; simj; Arp3; LanA; Elp3; cpb; kis; Ten-m; Hem; Rheb; stai; Liprin-alpha; Tor; Lar; Dap160; beag; Arfip; Nsf2; Abi; Akt1; Patr-1; PP2A-B'; Smu1; RhoGAP92B; Pi3K92E; Synd; Rab11; CASK; Nrx-1; spas; atl; Syx18; WASp; Cul…
GO:0008340	1.13817e-08	2.48078	52.3728	87	160	determination of adult lifespan	3.93489e-08	dor; Edem1; rb; cm; mys; Trxr-1; Ppt1; Atg8a; Egfr; levy; Thiolase; miple2; fwd; Cct1; ImpL2; Rpd3; sesB; Jafrac1; Clic; g; CG9172; car; gig; Cat; Indy; ms(3)72Dt; Eip71CD; l(3)neo18; Sod; Dronc; Hsp27; Hsp26; Cbs; Thor; GlyP; NLaz; CG2789; kis; Mnn1; Btk29A; Trx-2; Mtpalpha; CYLD; Tor; p38b; VhaSFD; hk; alpha-Est7; Prat; SdhC; ry; lkb1; foxo; Prx3; Dlc90F; ATPsyn-d; Naam; Sirt2; p38a; Hsp68; wdb…
GO:0006955	1.173e-08	1.96624	95.9076	142	293	immune response	4.0454e-08	CG32795; Rala; CG16756; Spt6; RpS6; Nrg; Crag; Tim10; Swim; Nxt1; key; E(bx); Rac1; HBS1; hop; PGRP-SA; lic; Flo2; betaCOP; Hayan; Vav; Cdc42; dome; Spn77Ba; Mkp3; CG4306; PGRP-SB1; PDCD-5; brm; Tollo; mop; Gl; ptip; Nplp2; Dronc; Shc; GNBP3; GstO2; Uba2; Rac2; LanA; Ntf-2; Sec5; Thor; GlyP; lwr; crq; kis; Hr78; ECSIT; Rm62; CG2051; mtd; MP1; Lam; CG13994; Spn27A; LanB1; Tep2; Tg; Spn28Dc; Pvr; E…
GO:0032507	1.18532e-08	8.2701	11.4565	28	35	maintenance of protein location in cell	4.07797e-08	alpha-Cat; Actn; Vinc; Act5C; zip; pav; Rok; SsRbeta; pbl; Ilk; chic; KdelR; cact; Pax; dia; by; Su(fu); mask; Dg; tum; Tapdelta; Ank; arm; Parp; Ank2; Msp300; rhea; Parg
GO:0006364	1.21016e-08	5.86318	15.0572	34	46	rRNA processing	4.14327e-08	sta; CG3071; CG3527; RpS6; CG2972; CG4038; Fib; Nop60B; CG8939; CG12301; NHP2; CG8549; RpS21; Rrp40; dbe; nop5; CG13097; CG4364; CG6724; Nnp-1; mtTFB2; CG9799; Mat89Ba; l(3)07882; CG5728; CG11837; RpS8; CG1542; CG8414; CG8545; CG1671; RpS7; CG5033; mtTFB1
GO:0008154	1.21016e-08	5.86318	15.0572	34	46	actin polymerization or depolymerization	4.14327e-08	DAAM; spoon; cpa; tsr; gek; Src64B; Arpc3B; Cdc42; flr; Arp3; Arpc5; cpb; Gel; Arpc4; chic; Btk29A; SCAR; Arpc1; CG5869; Arpc2; dia; Mical; SelR; sals; twf; Atx2; RhoGAP92B; ALiX; WASp; ena; LamC; wash; Arpc3A; nwk
GO:0042060	1.25726e-08	3.70288	25.5317	50	78	wound healing	4.29412e-08	sqh; sn; shg; Egfr; zip; Rac1; Atg2; kst; Rok; Cdc42; pcm; Alr; CG4306; Rac2; Gs1l; ed; CG33123; cold; rgn; Arpc4; chic; Tg; CG7627; Mtpalpha; holn1; RnrL; Utx; bsk; CG6750; Stam; fon; dia; CG9249; CG6005; CG10217; CG11089; Mtl; Fer2LCH; aralar1; Npc2h; Npc2g; Eb1; Rho1; scb; CG30010; Jra; glo; rl; bun; grh
GO:0007166	1.28863e-08	1.6221	194.107	258	593	cell surface receptor signaling pathway	4.39067e-08	CkIIalpha; Roc1a; SkpA; dor; Rbcn-3B; csw; sgg; Rala; VhaAC39-1; Fas2; CHOp24; ct; Nrg; e(r); mago; Sara; Egfr; Fkbp14; Swim; Gp150; Vps20; Nup214; gbb; MAN1; Nurf-38; spz6; key; Eps-15; Pdk1; E(bx); CG3402; CG32479; cue; Rac1; Cdc37; RpL8; Hsp83; pav; ImpL2; Rpd3; dsh; PGRP-SA; CkIalpha; lic; Nup93-1; opm; pdgy; shi; Chc; sl; Nup153; Rok; CG9099; e(y)1; fu; Ulp1; kek5; car; Cdc42; Nup205; gig; T…
GO:0007281	1.33123e-08	1.4986	286.741	363	876	germ cell development	4.52327e-08	alpha-Cat; CkIIalpha; Rbf; dor; mip130; usp; csw; sgg; Rala; Femcoat; ctp; snf; spoon; Act5C; sqh; wuho; Mcm6; Inx2; ct; sn; mys; slpr; Cp36; Moe; Dsor1; Yp2; flw; ras; cpa; shg; sktl; mago; tud; Egfr; Vps20; blw; vir; Dcp-1; gbb; tsr; DCP1; Zfrp8; Nop60B; zip; Pdk1; pUf68; Rac1; Cct1; alpha-Spec; R; ecd; msn; Hsp83; kst; Rop; Rpd3; Src64B; sesB; Dlic; dsh; hop; dlg1; Evi5; CkIIbeta; lic; Jafrac1…
GO:0006979	1.33395e-08	3.04246	34.697	63	106	response to oxidative stress	4.52327e-08	fh; Sesn; Pxn; Jafrac2; PHGPx; sesB; Jafrac1; Clic; ben; CG9172; Cat; Eip71CD; Atg1; l(3)neo18; Sod; CG3714; Thor; NLaz; ebi; fbl; Itp-r83A; Mnn1; Trx-2; CYLD; bsk; CG6770; p38b; CG10211; SelR; SdhC; foxo; Akt1; CG14898; Irc; CG5873; ATPsyn-d; Naam; Pi3K92E; TFAM; TotA; p38a; p38c; Atg6; alph; dj-1beta; CanA1; Trap1; GstE1; GstS1; Sod2; Atg9; Egm; whd; CG12896; Pxd; Prx5; Sod3; Mt2; rl; Lon; Duox…
GO:1901699	1.39502e-08	3.82722	24.2224	48	74	cellular response to nitrogen compound	4.71903e-08	SkpA; CG14812; Cbp80; Atg5; Pdk1; RpL8; Atg2; CG14977; ImpL2; pdgy; CG9099; gig; CG14184; Atg3; AGO2; Atg1; Atg18a; dock; CG7172; Atg17; r2d2; Pvr; loqs; CG5110; Nbr; CG1091; poly; foxo; GlyS; Akt1; Ns1; Cbp20; Pi3K92E; Atg6; Lnk; Atg16; dj-1beta; Ars2; hppy; CG5189; Dcr-2; Atg9; Dg; AGO1; RagC-D; Cul1; Pten; Pi3K21B
GO:0006468	1.43756e-08	1.79131	129.295	182	395	protein phosphorylation	4.85134e-08	CkIIalpha; SkpA; AMPKalpha; Pgd; sgg; Rala; Cdk7; RhoGAP5A; MAPk-Ak2; nonC; CG3198; slpr; Dsor1; flw; cpa; CG30291; mago; Egfr; Cdk9; l(2)efl; gek; CG3608; slik; Pdk1; CG7028; Sac1; Rac1; Cdc37; msn; Strip; CG12082; Eip63E; Src64B; hop; CkIIbeta; CkIalpha; lic; ben; mbt; Rok; par-6; CG8173; fu; Cdc42; Tao; gig; polo; CG14184; trc; Mkp3; CG10754; Atg1; JIL-1; fry; Hsp67Bc; Cbl; msk; syd; Rac2; Prp…
GO:0044801	1.52183e-08	5.10638	17.0211	37	52	single-organism membrane fusion	5.12349e-08	Sec22; dor; Marf; p115; Snap29; Vti1; nSyb; Syx17; comt; car; alphaSnap; NA; Syx13; SH3PX1; Membrin; Sec5; Rab5; CG2023; Rbsn-5; Vps16A; Vps45; Vps39; Gos28; Rab11; Syx1A; atl; Vps33B; Vha100-1; Vps16B; CDase; Opa1; rho-7; TER94; Vps25; Vps28; Vamp7; lt
GO:0050821	1.54208e-08	15.1466	8.18324	22	25	protein stabilization	5.17933e-08	ric8a; sicily; fw; CSN1b; Ubp64E; CSN3; CSN8; alien; Mhc; Sgt1; tws; Snx3; CSN5; CSN6; crb; Bap170; Mlf; trsn; 14-3-3zeta; CSN7; CSN4; Ccs
GO:0009062	1.55424e-08	10.3324	9.81989	25	30	fatty acid catabolic process	5.2078e-08	CG9577; CG3699; CG4586; Acox57D-p; Acox57D-d; Thiolase; CG9149; pdgy; Mfe2; CG12262; Mtpalpha; yip2; CG17544; CG9319; CG1041; CG4860; CG12428; CG3267; CG11208; CG6543; Egm; Etf-QO; CG5009; CG9527; CG14688
GO:0061025	1.58777e-08	4.91725	17.6758	38	54	membrane fusion	5.30758e-08	Sec22; dor; Marf; p115; Snap29; Vti1; nSyb; Syx17; comt; car; alphaSnap; NA; Syx13; SH3PX1; Membrin; Sec5; Rab5; CG2023; Rbsn-5; Vps16A; Vps45; Snap24; Vps39; Gos28; Rab11; Syx1A; atl; Vps33B; Vha100-1; Vps16B; CDase; Opa1; rho-7; TER94; Vps25; Vps28; Vamp7; lt
GO:0031329	1.63392e-08	2.6988	42.8802	74	131	regulation of cellular catabolic process	5.44898e-08	wds; Zw10; sgg; Atg8a; Rae1; Dcp-1; Atg2; ida; Syx17; sesB; Upf1; CkIalpha; REG; Atg101; gig; HLH106; CG6878; Atg1; vih; Ufd1-like; Sod; Dronc; Hsp67Bc; Atg18a; mad2; GlyP; mio; Atg4a; Chro; Rheb; PEK; Sec61alpha; Cks30A; Utx; bsk; piwi; Tor; Acn; Pax; Cdc23; Pomp; alphaTub84B; RagA-B; alphaTub85E; Ras85D; Bruce; foxo; GlyS; FK506-bp1; CSN5; Pi3K92E; Cdc16; crb; Bub3; Atg16; dco; nero; BubR1; Atg…
GO:0010941	1.67948e-08	2.20983	67.4299	106	206	regulation of cell death	5.58772e-08	Appl; SkpA; Rbf; CG14812; csw; Egfr; spag; zip; Pdk1; Jafrac2; CG12082; v; ben; rept; PDCD-5; fwe; Vps36; SRm160; Atg1; viaf; Dronc; pix; Cbl; RpL14; msk; MED24; velo; vito; Sep1; morgue; ebi; CG2789; l(2)gl; CG5059; Hdac3; Ubc6; aux; Sec61alpha; Aatf; Pvr; Su(var)205; l(2)k12914; Aldh; Pka-C1; Dref; RnrL; Utx; CIAPIN1; mdy; Aac11; ik2; Mcm10; MAGE; bel; Ras85D; Bruce; Tango9; lkb1; Atx2; Akt1; P…
GO:1901615	1.75748e-08	2.62478	45.1715	77	138	organic hydroxy compound metabolic process	5.83352e-08	usp; Torsin; Marf; sws; Nrg; t; yellow-d; Dat; CG3376; Trh; Rac1; Cct1; ecd; Flo2; scu; Hayan; Vav; Cdc42; Spn77Ba; CG17029; CG17027; Gl; Aps; Dronc; Shc; Rac2; ple; LanA; Ipk2; CG9391; MP1; Spn27A; Spn28Dc; Npc1a; bsk; CG33090; yellow-c; yellow-b; Catsup; dia; Sp7; sgll; RhoL; Fdh; yellow-f2; yellow-e; poly; Ipp; foxo; Manf; CG4335; Plip; Tl; woc; CG11899; sro; CG2201; Eb1; Rho1; Gpo-1; Cdk5; da…
GO:0046700	1.79354e-08	3.11369	32.733	60	100	heterocycle catabolic process	5.93927e-08	pn; Top3beta; nonC; Upf2; Not11; Upf3; DCP1; Pym; Dat; cN-IIIB; v; Upf1; Rcd-1; pcm; Adgf-A; Pop2; pix; RNaseX25; CG17224; CG2091; Rga; DhpD; CG8891; Rat1; CG8353; pelo; piwi; b; Smg5; l(2)35Df; CG8665; pyd3; RnpS1; Ho; Not10; ry; Adgf-D; sqd; Patr-1; DNaseII; WRNexo; tst; twin; Dis3; CG6330; Mesh1; CG11337; Not3; veil; Dg; AGO1; CG8525; CG8777; PAN2; Pabp2; gw; Not1; cu; Rrp6; Ude
GO:0048812	1.82371e-08	1.62751	186.905	249	571	neuron projection morphogenesis	6.02505e-08	CkIIalpha; Appl; AMPKalpha; CG11448; DAAM; rush; usp; Vinc; lva; Fas2; Ptp4E; ct; sn; mys; Nrg; Ppt1; Moe; ras; shg; HmgD; GM130; babos; tsr; Chi; betaTub60D; uzip; E(bx); trio; Sac1; Rac1; alpha-Spec; alphaCOP; MEP-1; msn; Strip; CG12082; prominin-like; Rpd3; Src64B; Dlic; dsh; Ran; Gtp-bp; Ptp10D; bif; mew; Bap60; CG2691; ben; Rok; if; beta-Spec; RhoGAPp190; Vav; Ulp1; Cdc42; alphaSnap; Mi-2; t…
GO:0042440	1.84067e-08	2.70952	42.2255	73	129	pigment metabolic process	6.06693e-08	dor; rb; cm; Nrg; yellow-d; Alas; or; CG3803; Rac1; Hexo1; v; g; Flo2; Hayan; Vav; car; Cdc42; Spn77Ba; Adgf-A; st; Gl; Dronc; Shc; Hn; Rac2; Prat2; LanA; mal; Dbp21E2; MP1; DhpD; cl; Spn27A; Coprox; ade3; santa-maria; Spn28Dc; CG8552; bsk; CG6750; yellow-c; yellow-b; dia; Sp7; Prat; alpha-Man-II; RhoL; Ho; yellow-f2; yellow-e; poly; Adgf-D; alpha-Man-IIb; pinta; Ppox; Tl; Cnx99A; FeCH; Eb1; Rho1…
GO:0045185	1.85195e-08	6.89351	12.7659	30	39	maintenance of protein location	6.08989e-08	alpha-Cat; Actn; Vinc; Act5C; zip; pav; Rok; if; SsRbeta; pbl; Ilk; chic; KdelR; cact; Pax; dia; by; Su(fu); mask; pins; Dg; tum; Tapdelta; Ank; arm; Parp; Ank2; Msp300; rhea; Parg
GO:0060627	1.8925e-08	3.43534	27.823	53	85	regulation of vesicle-mediated transport	6.20879e-08	dor; GAA1; Crag; Ppt1; Moe; Snap29; prtp; vap; Chc; car; Tao; Vps60; Arl1; RhoGAP68F; Sec5; Rab5; crq; Arf79F; Sec23; Rbsn-5; PIG-U; numb; l(2)gd1; CaBP1; BicD; Nak; Vps16A; AP-1mu; gish; Vps39; Gos28; Rab11; Cortactin; CASK; Sar1; Nrx-1; Syx1A; jar; Vps33B; Cad99C; Vps16B; cindr; inaC; stmA; AP-2alpha; Caps; lt; Lrrk; Sec16; mim; mnb; mgl; PIG-S
GO:0006635	2.12152e-08	20.6468	7.20125	20	22	fatty acid beta-oxidation	6.94404e-08	CG9577; CG3699; CG4586; Acox57D-p; Acox57D-d; Thiolase; CG9149; Mfe2; CG12262; Mtpalpha; yip2; CG17544; CG1041; CG4860; CG12428; CG6543; Egm; Etf-QO; CG5009; CG9527
GO:0050790	2.31998e-08	1.94952	94.271	139	288	regulation of catalytic activity	7.57609e-08	Ocrl; CG14812; Pgd; Zw10; sgg; Torsin; Cdk7; RhoGAP5A; slpr; Crag; CG30291; blw; Galphas; CG12084; Rac1; Patj; ecd; msn; Jafrac2; Src64B; CG1657; Evi5; lic; CtsB1; vap; mbt; par-6; Vav; gig; Mkp3; endos; vih; ArfGAP1; viaf; Dronc; fry; GAPcenA; Cbl; GAPsec; MED24; pbl; mad2; Ptpa; CG7261; CG31935; CG4552; drongo; Tbc1d15-17; l(2)gl; CG7324; CycH; ArfGAP3; Chro; ECSIT; Sec23; Atg17; CG9135; PDZ-GE…
GO:0009607	2.35465e-08	1.84285	113.256	162	346	response to biotic stimulus	7.67161e-08	ssx; CG32795; Rala; Vap-33A; tyf; CG3527; CG16756; Spt6; CBP; Crag; shg; Tim10; CG13551; PebIII; Phm; Nxt1; key; CG13890; Myo61F; HBS1; ecd; Jafrac2; Drsl5; Fit1; Vago; hop; PGRP-SA; CG2247; Yp3; CG14411; Tsf1; betaCOP; dome; CG7408; NUCB1; PDCD-5; AGO2; mop; ptip; Ufd1-like; Hsp27; GNBP3; GstO2; Atg18a; Rac2; Ntf-2; DIP1; Thor; CG16712; Npc2a; GlyP; AIF; spen; kis; CG7172; Hr78; Rm62; CG2051; Pc…
GO:0051050	2.45666e-08	2.99342	34.3696	62	105	positive regulation of transport	7.98556e-08	CHOp24; Crag; Ppt1; Moe; Act57B; CG3608; pav; prtp; p24-1; opm; Stim; Chc; U2af50; fu; Tao; Vps60; Sec5; Sec24CD; CG7338; Cdk12; Arf79F; Sec23; noi; RpL35A; Sec61alpha; Tango1; CG7214; numb; CaBP1; Cas; BicD; swm; Fs(2)Ket; eca; Kap-alpha3; Snx3; Dlc90F; RhoGAP92B; Rab11; Cortactin; Rab1; CASK; Sar1; Nrx-1; AdipoR; jar; Cad99C; cindr; inaC; unc-104; Lis-1; Diap2; Cam; Dmn; Cul4; AP-2alpha; Caps; …
GO:0043207	2.68953e-08	1.84124	112.601	161	344	response to external biotic stimulus	8.70251e-08	ssx; CG32795; Rala; Vap-33A; tyf; CG3527; CG16756; Spt6; CBP; Crag; shg; Tim10; CG13551; PebIII; Phm; Nxt1; key; CG13890; Myo61F; HBS1; ecd; Jafrac2; Drsl5; Fit1; Vago; hop; PGRP-SA; CG2247; Yp3; CG14411; Tsf1; betaCOP; dome; CG7408; NUCB1; PDCD-5; AGO2; mop; ptip; Ufd1-like; Hsp27; GNBP3; GstO2; Atg18a; Rac2; Ntf-2; DIP1; Thor; CG16712; Npc2a; GlyP; AIF; spen; kis; CG7172; Hr78; Rm62; CG2051; Pc…
GO:0051707	2.68953e-08	1.84124	112.601	161	344	response to other organism	8.70251e-08	ssx; CG32795; Rala; Vap-33A; tyf; CG3527; CG16756; Spt6; CBP; Crag; shg; Tim10; CG13551; PebIII; Phm; Nxt1; key; CG13890; Myo61F; HBS1; ecd; Jafrac2; Drsl5; Fit1; Vago; hop; PGRP-SA; CG2247; Yp3; CG14411; Tsf1; betaCOP; dome; CG7408; NUCB1; PDCD-5; AGO2; mop; ptip; Ufd1-like; Hsp27; GNBP3; GstO2; Atg18a; Rac2; Ntf-2; DIP1; Thor; CG16712; Npc2a; GlyP; AIF; spen; kis; CG7172; Hr78; Rm62; CG2051; Pc…
GO:0007043	2.76039e-08	5.68933	14.7298	33	45	cell-cell junction assembly	8.91141e-08	pck; bou; Nrg; shg; Patj; kst; Src64B; dlg1; par-6; Tsf2; Nrx-IV; crim; Galphai; sinu; cold; l(2)gl; Cont; nrv2; wol; crok; Gli; GckIII; crb; mesh; kune; cora; Lac; Galphao; Atpalpha; vari; arm; moody; aPKC
GO:0006915	2.88583e-08	2.21388	64.8113	102	198	apoptotic process	9.29513e-08	SkpA; Rbf; CG14812; csw; sws; Egfr; mRpS29; Dcp-1; snama; spag; Pdk1; Jafrac2; CG12082; CG4332; Tao; PDCD-5; fwe; Vps36; Atg1; viaf; Dronc; pix; RpL14; msk; MED24; vito; Sep1; morgue; ebi; CG2789; crq; CG5059; Hdac3; Ubc6; abs; Pvr; Su(var)205; l(2)k12914; Pka-C1; Dref; RnrL; spel1; CIAPIN1; mdy; Cas; Aac11; Acn; ik2; Mcm10; MAGE; Ras85D; Bruce; Tango9; lkb1; Akt1; Decay; Prx3; DNaseII; PP2A-B'; …
GO:0007009	2.99776e-08	5.41152	15.3845	34	47	plasma membrane organization	9.61188e-08	GAA1; Crag; alpha-Spec; scramb2; kst; shi; beta-Spec; Cdc42; nes; CG32082; scramb1; Arp3; Sec5; Sec24CD; Sec8; Sec23; wol; PIG-U; TM9SF4; dia; EndoA; Rab11; Sec15; Sar1; Exo84; CG5447; mino; Sec6; arm; mim; grh; aPKC; PI4KIIIalpha; PIG-S
GO:0044242	2.99776e-08	5.41152	15.3845	34	47	cellular lipid catabolic process	9.61188e-08	CG9577; CG3699; CG4586; Acox57D-p; Acox57D-d; Thiolase; CG3376; CG9149; pdgy; Mfe2; sl; CG12262; Mtpalpha; yip2; CG5731; CG17544; CG9319; CG1041; CG4860; CG12428; CDase; CG3267; CG11208; Jheh3; Jheh1; Sply; CG7997; CG6543; Egm; Etf-QO; CG5009; CG9527; Jheh2; CG14688
GO:0060429	3.15459e-08	1.421	370.865	454	1133	epithelium development	1.00918e-07	alpha-Cat; Rbf; CG13366; dor; mip130; usp; csw; crn; sgg; Rala; Femcoat; Fas2; CHOp24; ctp; RhoGAP5A; spoon; CG5966; sqh; Mcm6; Inx2; ct; sn; mys; fs(1)h; slpr; Cp36; Nrg; Moe; Dsor1; Zpr1; Bx42; Idgf4; flw; cpa; shg; Egfr; clt; Fkbp14; px; Vps20; vir; wmd; gbb; Lpt; Galphas; eIF-5A; gammaSnap1; tsr; Chi; spag; Nop60B; zip; Pdk1; fwd; trio; Sac1; Rabex-5; Myo61F; Rac1; Cct1; Patj; alpha-Spec; dlt…
GO:0051258	3.2121e-08	3.96338	21.9311	44	67	protein polymerization	1.02526e-07	DAAM; spoon; cpa; tsr; betaTub60D; Arpc3B; Cdc42; Grip84; polo; flr; Arp3; gammaTub23C; Arpc5; CG7261; cpb; Gel; Arpc4; chic; Btk29A; SCAR; Arpc1; CG5869; Arpc2; dia; alphaTub84D; alphaTub84B; alphaTub85E; SelR; sals; twf; Atx2; RhoGAP92B; ALiX; WASp; Tbce; betaTub56D; Khc; LamC; wash; cp309; Arpc3A; betaTub97EF; msps; nwk
GO:0090407	3.25665e-08	2.27184	60.2287	96	184	organophosphate biosynthetic process	1.03714e-07	cin; CG4406; GAA1; CG11190; e(r); l(1)G0230; ras; Ppcdc; blw; Galphas; fwd; Gyk; Cct1; CG12016; CG12006; sesB; CG1749; ade5; CG15743; CG9940; nmdyn-D6; Pis; CG8239; eas; ms(3)72Dt; CG10688; nst; ATPsyn-b; CG6767; CdsA; Prat2; Ppat-Dpck; mal; CG3714; Ts; Plc21C; Ipk2; fbl; CG4825; CG5828; Gmd; ade2; ade3; PIG-U; CG13090; fu12; RnrL; l(2)06225; Dpck; sgll; CG2846; Prat; CG8417; Adk3; CG14721; foxo;…
GO:0031399	3.3879e-08	1.99427	85.7604	128	262	regulation of protein modification process	1.07652e-07	CkIIalpha; SkpA; Pgd; Zw10; sgg; Rala; rb; Cdk7; RhoGAP5A; MAPk-Ak2; CG3198; slpr; Dsor1; flw; PPP4R2r; Atg8a; cpa; CG30291; mago; Lpt; slik; Sac1; Rabex-5; CG12084; Rac1; Cdc37; Patj; msn; Strip; CG12082; Rpd3; Src64B; lic; ben; mbt; Rok; par-6; fu; car; gig; CG14184; Mkp3; Tollo; endos; CG10754; vih; fry; Cbl; syd; mad2; Fnta; cpb; ebi; l(2)gl; Cdk12; CycH; Chro; Atg17; ksr; betaggt-I; smt3; Mn…
GO:0042327	3.68086e-08	3.08591	31.751	58	97	positive regulation of phosphorylation	1.16698e-07	Pgd; CG3198; slpr; Dsor1; mago; slik; Rac1; Cdc37; msn; Strip; Src64B; lic; ben; mbt; gig; CG14184; CG10754; fry; Fnta; Cdk12; Atg17; ksr; betaggt-I; smt3; Mnn1; Cka; Pvr; Tor; p38b; bsf; Dap160; eIF4AIII; Mkk4; M1BP; Ras85D; Tctp; Pp1-87B; Abi; Sur-8; Pk92B; crb; ALiX; CG4849; Mob4; hppy; Prp19; Atg9; drk; 14-3-3zeta; CG11107; Crk; Caper; gfzf; Slmap; rl; Alg-2; Rab3-GEF; raptor
GO:0007424	3.88235e-08	2.08542	74.6312	114	228	open tracheal system development	1.22811e-07	DAAM; pck; deltaCOP; csw; Fas2; Ptp4E; sqh; bou; ct; mys; Nrg; Moe; Zpr1; shg; Egfr; zip; Rac1; Src64B; dsh; hop; Ptp10D; mew; shi; Chc; if; par-6; Vav; Cdc42; dome; serp; Mkp3; TSG101; mbf1; Smn; caps; Nrx-IV; crim; Shc; foi; CdsA; Rac2; sgl; ple; sfl; LanA; sinu; Membrin; ed; CG3921; Sec5; colt; Sec24CD; cold; Spp; Hr78; Sec23; ksr; Lam; Hsp60C; mmy; nrv2; Btk29A; Stam; crok; Pgant35A; Gli; Mhc…
GO:0045088	4.26266e-08	3.45519	26.1864	50	80	regulation of innate immune response	1.3454e-07	CG32795; Rala; Crag; Tim10; Nxt1; key; E(bx); HBS1; betaCOP; Hayan; dome; Spn77Ba; PDCD-5; brm; GNBP3; GstO2; GlyP; Hr78; CG2051; mtd; CG13994; Spn27A; LanB1; Spn28Dc; Etl1; CYLD; p38b; Sp7; unc-45; MED6; mor; Atg6; Pp1alpha-96A; puf; Tl; CanA1; faf; DMAP1; imd; Su(var)2-10; Rel; att-ORFA; Prx5; tefu; Mt2; Dredd; Ide; CG42358; ird5; kug
GO:0098542	4.31131e-08	2.02036	81.1778	122	248	defense response to other organism	1.35773e-07	ssx; CG32795; Rala; Vap-33A; tyf; CG3527; CBP; Crag; shg; Tim10; CG13551; Nxt1; key; CG13890; Myo61F; HBS1; Jafrac2; Drsl5; Fit1; Vago; hop; PGRP-SA; CG2247; CG14411; betaCOP; dome; CG7408; NUCB1; PDCD-5; AGO2; Hsp27; GstO2; Atg18a; Rac2; DIP1; Thor; Npc2a; GlyP; AIF; spen; Hr78; Rm62; CG2051; Pcmt; mtd; CG13994; Spn27A; Tep3; r2d2; LanB1; Tep2; Wwox; CSN8; Glt; Trx-2; Etl1; me31B; SamDC; CYLD; b…
GO:0048469	4.32988e-08	2.21721	62.8473	99	192	cell maturation	1.36054e-07	CkIIalpha; Roc1a; SkpA; usp; Moe; flw; shg; sktl; mago; tud; Egfr; Dcp-1; DCP1; alpha-Spec; Hsp83; Rop; CkIIbeta; lic; Chc; Rok; par-6; ftz-f1; Lasp; blue; Dronc; Rac2; ndl; kis; l(2)gl; lost; Scox; chic; Hrb27C; SA; Rbsn-5; Pka-C1; Stam; Ge-1; Rab6; BicD; vls; ik2; E2f2; eIF4AIII; ird1; Ras85D; Mical; poly; lkb1; sqd; eff; ea; asun; CSN5; mira; Pi3K92E; Rab11; lsn; SMC1; Syx1A; Atg6; bai; spz; b…
GO:0045786	4.61675e-08	2.54796	45.1715	76	138	negative regulation of cell cycle	1.44747e-07	SkpA; Rbf; wds; Zw10; mei-9; Mcm3; Dsor1; Egfr; E(bx); Rcd5; RpII215; Aven; Mi-2; rept; CSN1b; brm; RecQ5; vih; Pop2; Mcm7; MED4; mad2; lwr; CSN3; Rpb8; Chro; Rga; Mnn1; CSN8; alien; Cks30A; me31B; Cdk1; mre11; spel1; Syx5; Top2; E2f2; alphaTub84B; RpA-70; M1BP; alphaTub85E; Kap-alpha3; pont; Tctp; MBD-R2; pic; RpII15; eff; mor; CSN5; MED17; Fancd2; CSN6; BRWD3; Ald; Bub3; BubR1; Spt5; Lis-1; Rcd…
GO:0042325	4.89554e-08	2.1676	66.1206	103	202	regulation of phosphorylation	1.53148e-07	SkpA; CG14786; Pgd; sgg; Rala; Cdk7; RhoGAP5A; MAPk-Ak2; CG3198; slpr; Dsor1; flw; cpa; CG30291; mago; slik; Sac1; Rac1; Cdc37; msn; Strip; CG12082; Src64B; lic; ben; mbt; Rok; par-6; gig; CG14184; Nca; Mkp3; CG10754; vih; fry; Cbl; syd; Fnta; cpb; ebi; CG2789; l(2)gl; Cdk12; CycH; Atg17; ksr; betaggt-I; smt3; Mnn1; Cka; Pvr; raw; Cks30A; bsk; CG17124; CycY; Tor; ics; p38b; bsf; Dap160; eIF4AIII;…
GO:0008064	5.08252e-08	6.20341	13.0932	30	40	regulation of actin polymerization or depolymerization	1.58297e-07	DAAM; spoon; cpa; gek; Src64B; Arpc3B; Cdc42; flr; Arp3; Arpc5; cpb; Gel; Arpc4; Btk29A; SCAR; Arpc1; CG5869; Arpc2; dia; sals; twf; Atx2; gish; RhoGAP92B; WASp; ena; LamC; wash; Arpc3A; nwk
GO:0030832	5.08252e-08	6.20341	13.0932	30	40	regulation of actin filament length	1.58297e-07	DAAM; spoon; cpa; gek; Src64B; Arpc3B; Cdc42; flr; Arp3; Arpc5; cpb; Gel; Arpc4; Btk29A; SCAR; Arpc1; CG5869; Arpc2; dia; sals; twf; Atx2; gish; RhoGAP92B; WASp; ena; LamC; wash; Arpc3A; nwk
GO:0048513	5.21274e-08	1.36592	471.355	562	1440	organ development	1.61996e-07	CkIIalpha; Appl; sdk; CG13366; DAAM; CG3638; usp; deltaCOP; csw; pn; crn; sgg; Rala; cib; Fas2; CHOp24; ctp; RhoGAP5A; Act5C; GAA1; CG5966; sqh; CG3226; ct; sn; mys; fs(1)h; sws; slpr; Nrg; Moe; AP-1gamma; Bx42; Idgf4; flw; Act57B; cpa; shg; Egfr; clt; Fkbp14; HmgD; Gp150; px; wdp; asrij; wmd; gbb; Lpt; Galphas; eIF-5A; gammaSnap1; tsr; Chi; snama; Zfrp8; spag; Nop60B; betaTub60D; zip; Tina-1; Pd…
GO:0051963	6.15642e-08	3.0084	32.0783	58	98	regulation of synapse assembly	1.90903e-07	SkpA; sgg; Fas2; Top3beta; Rae1; gbb; HSPC300; Eps-15; trio; Rac1; alpha-Spec; Src64B; dlg1; caz; beta-Spec; Cdc42; gig; Rab8; Abp1; RhoGAP68F; simj; Arp3; LanA; cpb; kis; Arfip; Nsf2; Akt1; Pak3; Patr-1; RhoGAP92B; Synd; Rab11; CASK; spas; atl; WASp; Cul5; Med; Cul2; Tbce; Mob4; ena; unc-104; Cdk5; scb; stan; Galphao; Acsl; Mob2; TBPH; futsch; mnb; Ank2; PI4KIIIalpha; nwk; raptor; Src42A
GO:0007264	6.69696e-08	2.08432	72.0125	110	220	small GTPase mediated signal transduction	2.0721e-07	Rab35; Rala; Rab18; CG3198; Rab39; Crag; Arfrp1; Dsor1; CG34408; mago; Rap2l; CG3402; RabX6; trio; Rabex-5; Rac1; Cdc37; R; msn; Strip; Ras64B; CG1657; Ran; vap; Graf; Rok; CG4789; RhoGAPp190; Cdc42; Rab8; MESR6; Arl1; RhoGAP71E; CG10754; ArfGAP1; RhoGAP68F; CG7197; Rac2; RhoGAP19D; Rab10; Fnta; Rab5; siz; Cdk12; Arf79F; Rheb; ksr; betaggt-I; smt3; Cka; CG7787; Akap200; Rab6; Sec71; Rab14; Lrch; …
GO:0032101	6.72719e-08	2.57082	43.2075	73	132	regulation of response to external stimulus	2.07691e-07	Spt6; Ppt1; Dcp-1; key; Rac1; dsh; PGRP-SA; rdgB; Atg101; Ulp1; HLH106; CG6878; ptip; Sod; Atg18a; Ntf-2; Elp3; Rm62; chic; Liprin-alpha; me31B; Tor; TM9SF4; cact; CG10333; Lar; CG9318; ird1; Ras85D; Bruce; GILT1; foxo; FK506-bp1; Akt1; MED25; Pebp1; GILT2; SPE; Pli; p38a; puf; Tl; spz; Gprk2; krz; DMAP1; Atg7; imd; Dcr-2; inaC; Sod2; casp; Diap2; Galphaq; Cam; stan; Jra; Myd88; PlexA; for; Rel; …
GO:0006900	6.90422e-08	11.3586	8.51057	22	26	membrane budding	2.12692e-07	rb; cm; AP-1gamma; or; shi; Chc; AP-1-2beta; Clc; Drp1; Sec24CD; Sec23; Vps24; AP-1mu; AP-2sigma; Sar1; AP-2mu; Sec13; AP-1sigma; WASp; Sec24AB; AP-2alpha; Sec16
GO:0034248	6.94562e-08	2.50721	45.4988	76	139	regulation of cellular amide metabolic process	2.13502e-07	CG14786; eIF2B-beta; tyf; CG5941; Spt6; CG10306; eIF2B-delta; l(2)efl; eIF-5A; Not11; key; PGRP-SA; CG9099; Rcd-1; Pex3; ptip; Pop2; Hsp67Bc; bol; GAPsec; Unr; Srp9; Ntf-2; mxt; Thor; mTerf3; Ddx1; Rheb; Rga; kra; PEK; eIF3-S10; Hrb27C; UK114; cact; bsf; Irp-1B; Not10; sqd; Atx2; MED25; Pi3K92E; how; Irp-1A; SPE; twin; 4EHP; msi; Tl; spz; Hrb98DE; eIF2B-alpha; Gprk2; heph; Not3; Spn42Da; Dp1; imd…
GO:0016072	7.04363e-08	5.02438	15.7118	34	48	rRNA metabolic process	2.16045e-07	sta; CG3071; CG3527; RpS6; CG2972; CG4038; Fib; Nop60B; CG8939; CG12301; NHP2; CG8549; RpS21; Rrp40; dbe; nop5; CG13097; CG4364; CG6724; Nnp-1; mtTFB2; CG9799; Mat89Ba; l(3)07882; CG5728; CG11837; RpS8; CG1542; CG8414; CG8545; CG1671; RpS7; CG5033; mtTFB1
GO:1901607	7.14902e-08	7.67558	10.8019	26	33	alpha-amino acid biosynthetic process	2.18803e-07	CG3011; CG2543; CG11134; CG9674; aay; CG8005; Cbs; Got2; Gs1; P5CDh1; CG7470; CG12173; CG12264; CG1315; Nmdmc; pug; Dhfr; P5cr-2; P5cr; CG11899; CG11334; Got1; SelD; CG9510; CG32068; CG17486
GO:0001934	7.5426e-08	3.05675	30.769	56	94	positive regulation of protein phosphorylation	2.30351e-07	Pgd; CG3198; slpr; Dsor1; mago; slik; Rac1; Cdc37; msn; Strip; Src64B; lic; ben; mbt; gig; CG14184; CG10754; fry; Fnta; Cdk12; Atg17; ksr; betaggt-I; smt3; Mnn1; Cka; Pvr; Tor; p38b; Dap160; eIF4AIII; Mkk4; M1BP; Ras85D; Tctp; Pp1-87B; Abi; Sur-8; Pk92B; ALiX; CG4849; Mob4; hppy; Prp19; Atg9; drk; 14-3-3zeta; CG11107; Crk; Caper; gfzf; Slmap; rl; Alg-2; Rab3-GEF; raptor
GO:0009893	7.99489e-08	1.55437	208.836	271	638	positive regulation of metabolic process	2.43637e-07	CkIIalpha; usp; Pgd; pn; CG3071; wds; sgg; tyf; Torsin; rb; RhoGAP5A; CG5941; Spt6; schlank; CG3198; NELF-B; fs(1)h; slpr; Crag; HP1b; dalao; Dsor1; fh; mago; NC2alpha; Dcp-1; Lpt; Galphas; eIF-5A; Chi; slik; key; Rabex-5; Rac1; Cdc37; dre4; ecd; msn; Jafrac2; Strip; ida; Rcd5; TfIIEbeta; Src64B; sesB; PGRP-SA; Upf1; CkIalpha; lic; Bap60; g; ben; exd; vap; Nup153; mbt; CG9099; e(y)1; fu; Atg101; …
GO:0008593	8.17222e-08	2.89541	33.715	60	103	regulation of Notch signaling pathway	2.48506e-07	dor; Rbcn-3B; Rala; VhaAC39-1; ct; e(r); Sara; Fkbp14; Vps20; Nurf-38; Eps-15; E(bx); CG32479; dsh; shi; Chc; car; asf1; Vps36; Arp3; lqf; Su(dx); ebi; l(2)gl; pzg; CG9769; eIF-3p40; numb; Utx; l(2)gd1; Vha68-1; Arpc1; EndoGI; Dap160; Vps16A; AP-1mu; Vps39; lsn; Usp12-46; rumi; Rab7; Ime4; crb; Vps2; krz; Ehbp1; O-fut1; stan; shrb; Vps25; Vps28; ACC; CRMP; Hrs; lt; uif; bun; CoRest; Nipped-A; Rbc…
GO:0043408	8.3377e-08	2.76782	36.6609	64	112	regulation of MAPK cascade	2.52994e-07	SkpA; Pgd; sgg; Rala; RhoGAP5A; MAPk-Ak2; CG3198; slpr; Dsor1; flw; cpa; mago; Sac1; Cdc37; msn; Strip; CG12082; lic; ben; mbt; CG14184; Mkp3; CG10754; syd; Fnta; cpb; ebi; Cdk12; ksr; betaggt-I; smt3; Mnn1; Cka; Pvr; raw; bsk; ics; eIF4AIII; Mkk4; M1BP; Ras85D; Pp1-87B; lkb1; Sur-8; ATPsyn-d; Pk92B; XNP; ALiX; CG4849; alph; Mob4; hppy; Prp19; Atg9; drk; 14-3-3zeta; CG11107; Crk; Caper; gfzf; Slm…
GO:0030833	8.78108e-08	6.97533	11.4565	27	35	regulation of actin filament polymerization	2.65877e-07	DAAM; spoon; cpa; Arpc3B; Cdc42; flr; Arp3; Arpc5; cpb; Gel; Arpc4; Btk29A; SCAR; Arpc1; CG5869; Arpc2; dia; sals; twf; Atx2; gish; RhoGAP92B; WASp; LamC; wash; Arpc3A; nwk
GO:0022412	1.03943e-07	1.43817	313.909	388	959	cellular process involved in reproduction in multicellular organism	3.1405e-07	alpha-Cat; CkIIalpha; Rbf; dor; mip130; usp; csw; sgg; Rala; Femcoat; ctp; snf; spoon; Act5C; sqh; wuho; Mcm6; Inx2; ct; sn; mys; slpr; Cp36; Moe; Dsor1; Yp1; Yp2; flw; ras; cpa; shg; sktl; mago; tud; Egfr; Vps20; blw; vir; Dcp-1; gbb; tsr; DCP1; Zfrp8; Nop60B; zip; Pdk1; fwd; E(bx); cue; pUf68; Rac1; Cct1; alpha-Spec; R; ecd; msn; Hsp83; kst; Ubi-p63E; Rop; Rpd3; Src64B; sesB; Dlic; dsh; hop; dl…
GO:0032386	1.10275e-07	3.58535	23.2404	45	71	regulation of intracellular transport	3.3247e-07	sgg; CHOp24; GAA1; Crag; Act57B; Nup214; pav; Stim; U2af50; fu; Arl1; RhoGAP68F; Trn; Rcc1; Sec5; Sec23; noi; CG7214; PIG-U; cact; Cas; swm; Fs(2)Ket; eca; Kap-alpha3; AP-1mu; Tango9; Su(fu); mbo; Akt1; gish; Dlc90F; Gos28; Rab11; Sar1; crb; Cnx99A; dco; Lis-1; Diap2; Cam; Dmn; Cul4; Sec16; PIG-S
GO:1901565	1.11077e-07	3.1707	28.1504	52	86	organonitrogen compound catabolic process	3.34178e-07	arg; pn; Idgf4; Dat; cN-IIIB; CG3376; Cht2; Cht7; Gad1; v; CG7860; CG7430; Adgf-A; PGRP-SB1; CG8745; CG10361; CG6638; CG8005; Hn; ppl; DhpD; CG9547; CG8460; CG8353; CG5731; CG6415; hgo; b; Idgf1; Idgf2; Idgf3; CG8665; pyd3; GstZ2; GstZ1; CG3999; Ho; ry; Cht5; Adgf-D; Ssadh; Mesh1; CDase; CG3267; Idgf5; Sply; CG5210; CG7997; Gdh; Sardh; Cht3; CG9380
GO:0006403	1.13276e-07	2.32905	52.0454	84	159	RNA localization	3.40067e-07	CkIIalpha; sta; Cbp80; spoon; RpS28b; mago; tud; CG10320; thoc5; DCP1; Nxt1; thoc7; Hsp83; Rop; sbr; Dlic; CkIIbeta; CG8184; Chc; U2af50; Lasp; Arl1; AGO2; Gl; blue; thoc6; Rac2; Cog3; Trn-SR; tho2; Hpr1; lost; Hel25E; chic; Hrb27C; Rbsn-5; Pka-C1; Nup107; Nup160; Ge-1; Rab6; VhaSFD; BicD; swm; eIF4AIII; lkb1; sqd; ldlCp; mira; CG4572; Srp72; Rab11; lsn; CG5382; AP-2mu; Nup133; Rab7; Syx1A; btz; …
GO:0032271	1.17611e-07	5.99515	12.7659	29	39	regulation of protein polymerization	3.51589e-07	DAAM; spoon; cpa; Arpc3B; Cdc42; flr; Arp3; Arpc5; CG7261; cpb; Gel; Arpc4; Btk29A; SCAR; Arpc1; CG5869; Arpc2; dia; sals; twf; Atx2; gish; RhoGAP92B; WASp; LamC; wash; Arpc3A; msps; nwk
GO:0070997	1.17611e-07	5.99515	12.7659	29	39	neuron death	3.51589e-07	Appl; sws; spag; v; fwe; pix; RpL14; msk; ebi; aux; Aldh; MAGE; Atx2; Akt1; Naam; psidin; RpS3; vimar; hpo; pAbp; TER94; Drep-2; TBPH; mt:CoI; tefu; futsch; Lrrk; Ect4; tau
GO:0006631	1.21797e-07	3.20355	27.4957	51	84	fatty acid metabolic process	3.62569e-07	CG9577; CG3699; CG4586; CG10932; Acox57D-p; Acox57D-d; Thiolase; CG9149; mtacp1; pdgy; Mfe2; CG9914; scu; CG6891; HLH106; beg; Baldspot; Pex3; CG14130; CG12262; CG12170; CG31523; CG9804; Mtpalpha; yip2; CG6746; bgm; CG4500; CG17544; CG9319; CG1041; CG4860; AdipoR; CG6178; CG12428; CG3267; CG11208; Cyp6a8; CG16935; CG6543; Egm; Etf-QO; Acsl; Lpin; ACC; CG10602; CG5009; CG9527; CG14688; Las; CG17374
GO:0015931	1.21797e-07	3.20355	27.4957	51	84	nucleobase-containing compound transport	3.62569e-07	sta; Cbp80; RpS28b; mago; tud; CG10320; thoc5; Nxt1; thoc7; sbr; sesB; Dlic; CG8184; Chc; U2af50; Arl1; AGO2; Gl; thoc6; Cog3; Trn-SR; tho2; Hpr1; Hel25E; Ent2; Nup107; Nup160; VhaSFD; BicD; swm; sqd; ldlCp; CG4572; Srp72; CG5382; AP-2mu; Nup133; Rab7; ncd; Sap-r; Vha16-1; Nup75; Dcr-2; JhI-1; tsu; Phax; Dmn; CG14749; Bet3; lt; egl
GO:0007346	1.22639e-07	2.04661	72.6672	110	222	regulation of mitotic cell cycle	3.64309e-07	SkpA; Rbf; wds; Zw10; sgg; mei-9; Mcm3; Moe; Dsor1; Egfr; Rae1; slik; E(bx); Psf1; Klp61F; ida; Rcd5; Ran; RpII215; Aven; REG; ben; rept; CSN1b; Capr; brm; RecQ5; endos; vih; Pop2; Mcm7; MED4; Rcc1; mad2; Pp4-19C; lwr; CSN3; pzg; Rpb8; Chro; Rga; PEK; Mnn1; CSN8; alien; Cks30A; me31B; Cdk1; mre11; crol; spel1; Syx5; swm; Top2; Cdc23; Mcm10; E2f2; alphaTub84B; RpA-70; M1BP; alphaTub85E; Kap-alpha3…
GO:0007165	1.26367e-07	1.36473	441.568	527	1349	signal transduction	3.74597e-07	Rab35; CkIIalpha; Roc1a; SkpA; Rbf; AMPKalpha; dor; Rbcn-3B; usp; Edem1; CG14812; csw; Pgd; pn; sgg; Rala; VhaAC39-1; Fas2; CHOp24; RhoGAP5A; CG16721; MAPk-Ak2; CG32758; Rab18; Mipp2; schlank; CG3198; ogre; ct; Rab39; slpr; Nrg; Crag; e(r); Arfrp1; Dsor1; Lst8; CG34408; flw; cpa; mago; Sara; Egfr; Fkbp14; CG6613; Swim; Gp150; Vps20; asrij; Nup214; gbb; Lpt; Galphas; MAN1; Rap2l; gek; Nurf-38; spz…
GO:0051651	1.30008e-07	5.63879	13.4205	30	41	maintenance of location in cell	3.84584e-07	alpha-Cat; Actn; Vinc; Act5C; sktl; mago; zip; pav; Rok; SsRbeta; pbl; Ilk; chic; KdelR; cact; Pax; dia; by; Su(fu); mask; Dg; tum; Tapdelta; Ank; arm; Parp; Ank2; Msp300; rhea; Parg
GO:0006417	1.39237e-07	3.00142	30.4417	55	93	regulation of translation	4.11025e-07	CG14786; eIF2B-beta; tyf; CG5941; CG10306; eIF2B-delta; l(2)efl; eIF-5A; Not11; CG9099; Rcd-1; Pop2; Hsp67Bc; bol; GAPsec; Unr; Srp9; mxt; Thor; mTerf3; Ddx1; Rheb; Rga; kra; PEK; eIF3-S10; Hrb27C; UK114; bsf; Irp-1B; Not10; sqd; Atx2; Pi3K92E; how; Irp-1A; twin; 4EHP; msi; Hrb98DE; eIF2B-alpha; heph; Not3; Dp1; pAbp; stau; eIF3-S9; AGO1; JhI-1; eIF-3p66; glo; Not1; mtTFB1; orb2; CG44254
GO:0065009	1.50158e-07	1.78369	111.619	157	341	regulation of molecular function	4.4234e-07	CkIIalpha; Rbf; Ocrl; CG14812; Pgd; Zw10; sgg; Torsin; Cdk7; RhoGAP5A; slpr; Crag; CG30291; blw; CycB; Galphas; Ssrp; CG12084; Rac1; Patj; ecd; msn; Jafrac2; Src64B; CG1657; Evi5; lic; CtsB1; vap; Stim; mbt; par-6; fu; Vav; gig; Taf6; Mkp3; endos; vih; ArfGAP1; viaf; Dronc; fry; GAPcenA; Cbl; GAPsec; MED24; Uba2; pbl; mad2; Ptpa; CG7261; CG31935; CG4552; drongo; Tbc1d15-17; l(2)gl; CG7324; CycH; …
GO:0022610	1.51011e-07	1.98303	78.5591	117	240	biological adhesion	4.43928e-07	alpha-Cat; Vinc; Fas2; RhoGAP5A; MAPk-Ak2; Rab18; mys; Nrg; NA; flw; shg; Egfr; Cdk9; CG3829; emp; CG2736; CG7028; Rac1; alpha-Spec; R; Girdin; Fit1; ImpL2; Src64B; dyl; Con; Ran; fw; mew; Jafrac1; Flo2; Gbeta13F; Stim; Chc; mbt; Rok; AnxB11; if; par-6; Vav; parvin; Mkp3; Cat; caps; Nrx-IV; prc; LanB2; pbl; LanA; sinu; ed; Sec24CD; crq; Pitslre; Ilk; Ten-m; Hem; Arf79F; Sec23; CG12007; Cont; Arpc…
GO:0051168	1.57716e-07	4.68886	16.0392	34	49	nuclear export	4.62678e-07	sta; Ns3; Nmd3; Torsin; RpS28b; mago; Nup214; thoc5; Nxt1; thoc7; sbr; Ranbp16; U2af50; thoc6; Trn-SR; tho2; Hpr1; Hel25E; emb; Nup107; Nup160; Cas; swm; mbo; sqd; Nup133; RanBP3; Nup75; JhI-1; tsu; Phax; Mys45A; CG14749; Clbn
GO:0051704	1.58459e-07	1.33892	503.433	593	1538	multi-organism process	4.63894e-07	alpha-Cat; CkIIalpha; NA; Rbf; ssx; CG3638; dor; mip130; usp; CG14812; csw; tko; sgg; CG32795; Rala; Vap-33A; tyf; Femcoat; CHOp24; CG3527; Cbp80; ctp; snf; CG16756; spoon; Act5C; sqh; Spt6; wuho; Mcm6; Inx2; CBP; ct; sn; mys; slpr; Cp36; Nrg; Crag; Hexo2; Moe; Dsor1; Yp1; Yp2; flw; ras; cpa; shg; sktl; mago; tud; Egfr; Tim10; Rae1; clt; CG10433; Fkbp14; Gp150; px; Vps20; blw; CG13551; vir; Dcp-1…
GO:0043241	1.5901e-07	4.38172	17.3485	36	53	protein complex disassembly	4.64547e-07	cpa; eIF-5A; tsr; Pym; fwd; Klp61F; alpha-Spec; HBS1; CG12082; Klp10A; comt; beta-Spec; alphaSnap; flr; Klp67A; cpb; eRF1; Csp; Sec8; aux; Gel; CG6094; Elf; CG5705; fws; bru; Mical; Nsf2; twf; spas; atl; Exo84; Patronin; shot; mlt; chb
GO:0016226	1.59682e-07	Inf	4.58262	14	14	iron-sulfur cluster assembly	4.6459e-07	NA; fh; ABCB7; l(1)G0136; CG4858; CG12264; CIAPIN1; CG17904; CG9836; CG13623; Ciao1; CG17683
GO:0031163	1.59682e-07	Inf	4.58262	14	14	metallo-sulfur cluster assembly	4.6459e-07	NA; fh; ABCB7; l(1)G0136; CG4858; CG12264; CIAPIN1; CG17904; CG9836; CG13623; Ciao1; CG17683
GO:0070887	1.63363e-07	1.85014	97.5443	140	298	cellular response to chemical stimulus	4.74324e-07	SkpA; usp; Edem1; CG14812; csw; eIF2B-beta; Cbp80; Atg5; Tom40; slpr; Sara; gbb; Lpt; MAN1; Nurf-38; Letm1; Pdk1; E(bx); RpL8; Atg2; CG17737; CG14977; ImpL2; Chd64; sesB; Upf1; lic; Set2; pdgy; CG9099; fu; Ulp1; kek5; Cdc42; Tim9b; gig; CG14184; Atg3; ftz-f1; Eip71CD; AGO2; Atg1; CG10688; nst; Sod; SH3PX1; dally; Atg18a; sgl; sfl; Dd; dock; Spp; lwr; l(2)gl; pzg; CG7172; Hr78; Atg17; smt3; r2d2; …
GO:0018193	1.68129e-07	2.012	74.6312	112	228	peptidyl-amino acid modification	4.8716e-07	CG11412; wds; nonC; Ost48; Sgf29; Fkbp14; CG2852; Lpt; CG3511; slik; Cypl; l(3)02640; Rpd3; Src64B; hop; FucT6; Set2; Tango13; Cyp1; mbt; e(y)1; Ulp1; rept; brm; ptip; CG10907; CG11652; CG8336; CG3967; Cbl; CG8005; Uba2; velo; QC; Elp3; Taf10b; lwr; isoQC; Rbbp5; CG2051; Hcs; Hdac3; lid; smt3; Gas41; Mnn1; LKR; Btk29A; Su(var)205; Wdr82; FKBP59; Utx; Dpy-30L1; Art8; aurB; NC2beta; ik2; Art4; pont…
GO:0051129	1.7321e-07	2.49242	43.2075	72	132	negative regulation of cellular component organization	5.00857e-07	SkpA; Zw10; sgg; spoon; HP1b; cpa; NC2alpha; Rae1; fwd; Rac1; Klp61F; alpha-Spec; Rpd3; Src64B; bif; beta-Spec; gig; Mi-2; flr; RhoGAP68F; JIL-1; msl-3; LanA; mad2; obst-A; CG7261; cpb; Chro; Sec8; Gel; Utx; spel1; NC2beta; CG5869; fws; bru; alphaTub84B; alphaTub85E; Tango9; twf; su(Hw); Akt1; gish; Patr-1; RhoGAP92B; Rab11; spas; polybromo; Exo84; WASp; Bub3; BubR1; Bap170; Mob4; ena; Patronin; …
GO:0008356	1.84301e-07	2.88335	32.0783	57	98	asymmetric cell division	5.31841e-07	ric8a; shg; Sara; zip; pUf68; dlg1; Gbeta13F; eas; par-6; Cdc42; CSN1b; dally; Galphai; l(2)gl; CSN3; eIF-4a; mts; alien; numb; pelo; Dref; Cdk1; piwi; aurB; l(2)gd1; Tor; loqs; Nak; ik2; Sgt1; tws; lkb1; flfl; eff; CSN5; mira; twin; jar; pins; ALiX; WASp; Ote; stau; Ehbp1; clu; cnn; Galphao; shrb; Ggamma1; CSN7; Incenp; chb; AP-2alpha; aPKC; mud; hts; orb2
GO:0010876	1.86308e-07	3.40327	24.2224	46	74	lipid localization	5.36535e-07	Roc1a; AMPKalpha; deltaCOP; rb; CG30392; blw; CG9186; alphaCOP; ImpL2; Lsd-2; CG6299; CG4301; betaCOP; Indy; zetaCOP; CdsA; cert; Rac2; CG10671; Npc2a; Su(dx); Arf79F; Npc1a; Ubc2; CG31729; beta'COP; mdy; ScpX; Mtp; alpha-Est7; foxo; Npc2b; cv-d; Akt1; Nrx-1; p38c; Npc2h; Npc2g; dco; Acsl; Rfabg; Pten; ltd; CG42321; Apoltp; LRP1
GO:0034655	1.88648e-07	3.07974	28.4777	52	87	nucleobase-containing compound catabolic process	5.42171e-07	pn; Top3beta; nonC; Upf2; Not11; Upf3; DCP1; Pym; cN-IIIB; Upf1; Rcd-1; pcm; Adgf-A; Pop2; pix; RNaseX25; CG17224; CG2091; Rga; CG8891; Rat1; CG8353; pelo; piwi; Smg5; l(2)35Df; RnpS1; Not10; Adgf-D; sqd; Patr-1; DNaseII; WRNexo; tst; twin; Dis3; CG6330; Mesh1; CG11337; Not3; veil; Dg; AGO1; CG8525; CG8777; PAN2; Pabp2; gw; Not1; cu; Rrp6; Ude
GO:0030011	2.00522e-07	33.0062	5.56461	16	17	maintenance of cell polarity	5.75127e-07	Cdc42; TSG101; Sec24CD; Sec23; Sgt1; tws; lkb1; crb; Exo84; Khc; Rho1; shark; alc; Vps25; AnxB9; aPKC
GO:1901698	2.16401e-07	2.57568	39.6069	67	121	response to nitrogen compound	6.19416e-07	SkpA; CG14812; Cbp80; Atg5; Cyp6d2; Galphas; Pdk1; RpL8; Atg2; CG14977; ImpL2; PGRP-SA; pdgy; sl; CG9099; Tao; gig; CG14184; Atg3; AGO2; CG8745; Atg1; Hsp67Bc; Atg18a; dock; CG7172; Atg17; r2d2; Pvr; loqs; CG5110; Nbr; MAGE; CG1091; poly; foxo; GlyS; Akt1; Ns1; Cbp20; Pi3K92E; Hsp68; Atg6; Lnk; Atg16; dj-1beta; CanA1; dco; Ars2; Cyp6a2; hppy; CG5189; Hsf; Dcr-2; Atg9; Dg; Cyp6a8; Mdr50; AGO1; Pka…
GO:0009791	2.29322e-07	1.50877	224.221	286	685	post-embryonic development	6.5376e-07	CG13366; usp; deltaCOP; sgg; cib; Fas2; ctp; RhoGAP5A; CG5966; sqh; Marf; ct; sn; mys; fs(1)h; slpr; Nrg; Moe; fh; flw; Egfr; clt; Fkbp14; px; asrij; wmd; gbb; Lpt; Galphas; tsr; Chi; spag; zip; Pdk1; E(bx); Gale; trio; Rabex-5; Myo61F; Rac1; Cct1; Patj; alpha-Spec; dlt; ecd; msn; Atg2; Eip63E; ImpE2; dsh; hop; dlg1; bif; fw; pot; dy; ade5; mew; Set2; l(1)G0007; Lsd-2; CG9503; CG9509; CG9512; Top…
GO:0070647	2.29324e-07	1.90431	86.4151	126	264	protein modification by small protein conjugation or removal	6.5376e-07	CkIIalpha; Roc1a; SkpA; Zw10; rb; CG4165; CG3016; CG3781; Ubi-p5E; UbcE2H; Atg8a; snama; CG3356; CG30421; CG32479; Rabex-5; CG9153; CG12084; CG12099; CG32486; CG12082; Ubi-p63E; CG1749; Usp7; ben; CG8184; CG9086; fu; CG7288; Ulp1; car; CSN1b; CG7427; CG7857; Ube3a; APP-BP1; Ubc4; Uch-L5; CG5087; Cbl; UbcE2M; Uba2; velo; Ubp64E; mad2; Bre1; Uev1A; CG4603; RpL40; Su(dx); Uch; lwr; CSN3; Chro; CG976…
GO:0035088	2.4138e-07	6.19955	11.7839	27	36	establishment or maintenance of apical/basal cell polarity	6.85363e-07	AMPKalpha; Moe; Egfr; Patj; dsh; dlg1; par-6; TSG101; Gl; prc; gkt; Rab5; l(2)gl; Cont; Rbsn-5; Ras85D; yrt; crb; Exo84; TBCB; Rho1; shark; Dg; alc; Vps25; Csk; aPKC
GO:0061245	2.4138e-07	6.19955	11.7839	27	36	establishment or maintenance of bipolar cell polarity	6.85363e-07	AMPKalpha; Moe; Egfr; Patj; dsh; dlg1; par-6; TSG101; Gl; prc; gkt; Rab5; l(2)gl; Cont; Rbsn-5; Ras85D; yrt; crb; Exo84; TBCB; Rho1; shark; Dg; alc; Vps25; Csk; aPKC
GO:0006612	2.56907e-07	9.0858	8.8379	22	27	protein targeting to membrane	7.26532e-07	TRAM; Gtp-bp; Nup93-1; Srp68; SrpRbeta; Srp9; Sec63; Srp19; Srp54k; Sec24CD; Sec23; Sec61alpha; CG5885; Trp1; Srp72; Sar1; CG10420; cora; Sec61beta; boca; Nup154; Srp14
GO:0072527	2.56907e-07	9.0858	8.8379	22	27	pyrimidine-containing compound metabolic process	7.26532e-07	CG17896; e(r); su(r); nmdyn-D6; Adk1; Ts; CG8353; dUTPase; b; pyd3; Dhod; CG14721; ry; Dhfr; r-l; Dak1; CG5757; l(2)k01209; CRMP; r; awd; CTPsyn
GO:0060548	2.6464e-07	2.7975	33.0603	58	101	negative regulation of cell death	7.46908e-07	Appl; SkpA; Rbf; CG14812; csw; Egfr; spag; Pdk1; CG12082; pix; RpL14; msk; velo; vito; ebi; Hdac3; Ubc6; aux; Aatf; Pvr; l(2)k12914; Aldh; CIAPIN1; Aac11; Mcm10; MAGE; Ras85D; Bruce; Tango9; Akt1; Prx3; PP2A-B'; Naam; psidin; RpS3; mask; Apc; dco; qless; hpo; pAbp; Diap2; Galphaq; ix; Drep-2; Cul1; TBPH; Prx5; tefu; futsch; Lrrk; rl; Dredd; yki; bun; Duox; CG42593; tau
GO:1901214	2.69898e-07	5.78699	12.4385	28	38	regulation of neuron death	7.60231e-07	Appl; spag; v; fwe; pix; RpL14; msk; ebi; aux; Aldh; MAGE; Atx2; Akt1; Naam; psidin; RpS3; vimar; hpo; pAbp; TER94; Drep-2; TBPH; mt:CoI; tefu; futsch; Lrrk; Ect4; tau
GO:0051336	2.77376e-07	2.30908	49.7541	80	152	regulation of hydrolase activity	7.79742e-07	Ocrl; CG14812; Torsin; RhoGAP5A; Crag; Patj; Jafrac2; CG1657; Evi5; vap; Vav; gig; endos; ArfGAP1; viaf; Dronc; GAPcenA; GAPsec; MED24; pbl; CG7261; CG31935; CG4552; drongo; Tbc1d15-17; CG7324; ArfGAP3; Sec23; CG9135; PDZ-GEF; Spn27A; Spn28Dc; RnrL; Ced-12; EndoGI; Pax; RtGEF; ik2; bru; CG10068; CG8449; SIDL; Spn88Ea; CG5916; Mdh2; RhoGAP92B; Rlip; CG5745; mbc; CG5521; Drice; Acf1; Spn42Dc; Spn42…
GO:0090501	3.00018e-07	13.0715	7.20125	19	22	RNA phosphodiester bond hydrolysis	8.40049e-07	sta; CG2972; CG2145; IntS9; CG3689; CG7185; RpS21; Clp; Sym; CstF-64; Cpsf73; Cpsf100; IntS11; CstF-50; Dcr-2; AGO1; JhI-1; Cpsf160; su(f)
GO:1903034	3.00018e-07	13.0715	7.20125	19	22	regulation of response to wounding	8.40049e-07	Egfr; Rac1; Rok; Ulp1; Cdc42; Rac2; Csp; chic; holn1; dia; CG5044; Akt1; Mtl; krz; Rho1; Pten; rl; grh; Imp
GO:0060541	3.02582e-07	1.93654	80.1958	118	245	respiratory system development	8.45556e-07	DAAM; pck; deltaCOP; csw; Fas2; Ptp4E; sqh; bou; ct; mys; Nrg; Moe; Zpr1; shg; Egfr; wdp; zip; Rac1; Src64B; dsh; hop; Ptp10D; mew; shi; Chc; if; par-6; Vav; Cdc42; dome; serp; Mkp3; TSG101; mbf1; Smn; caps; nst; Nrx-IV; crim; Shc; foi; CdsA; Rac2; sgl; ple; sfl; LanA; sinu; Membrin; ed; CG3921; Sec5; colt; Sec24CD; cold; Spp; Hr78; Sec23; ksr; Lam; Hsp60C; mmy; nrv2; Btk29A; Stam; crok; Pgant35A…
GO:0001932	3.1714e-07	2.12569	60.8833	94	186	regulation of protein phosphorylation	8.8449e-07	SkpA; Pgd; sgg; Rala; Cdk7; RhoGAP5A; MAPk-Ak2; CG3198; slpr; Dsor1; flw; cpa; CG30291; mago; slik; Sac1; Rac1; Cdc37; msn; Strip; CG12082; Src64B; lic; ben; mbt; Rok; par-6; gig; CG14184; Mkp3; CG10754; vih; fry; Cbl; syd; Fnta; cpb; ebi; l(2)gl; Cdk12; CycH; Atg17; ksr; betaggt-I; smt3; Mnn1; Cka; Pvr; raw; Cks30A; bsk; CycY; Tor; ics; p38b; Dap160; eIF4AIII; Mkk4; M1BP; Ras85D; Tctp; Pp1-87B; …
GO:0030162	3.27558e-07	2.52855	39.9342	67	122	regulation of proteolysis	9.11747e-07	CG14812; wds; Zw10; sgg; Jafrac2; ida; CkIalpha; REG; fu; Spn77Ba; vih; viaf; Ufd1-like; Dronc; MED24; mad2; ebi; Chro; Spn27A; Spn28Dc; Cks30A; RnrL; Nedd8; Cdc23; ik2; Pomp; alphaTub84B; alphaTub85E; hyd; Spn88Ea; CSN5; Mdh2; mira; Cdc16; crb; pll; Bub3; Drice; dco; faf; krz; BubR1; Spn42Dc; Spn42De; Spn42Da; hpo; cer; Spn55B; casp; Diap2; Tango7; Mtor; RnrS; PI31; Fbl6; TER94; sel; Mad1; CSN4;…
GO:0043624	3.3394e-07	4.25895	17.0211	35	52	cellular protein complex disassembly	9.27683e-07	cpa; eIF-5A; tsr; fwd; Klp61F; alpha-Spec; HBS1; CG12082; Klp10A; comt; beta-Spec; alphaSnap; flr; Klp67A; cpb; eRF1; Csp; Sec8; aux; Gel; CG6094; Elf; CG5705; fws; bru; Mical; Nsf2; twf; spas; atl; Exo84; Patronin; shot; mlt; chb
GO:0043604	4.02387e-07	1.44284	275.612	342	842	amide biosynthetic process	1.11564e-06	RpL22; RpL36; CG14786; sta; mRpL16; eIF2B-epsilon; mRpL14; CG8636; tko; eIF2B-beta; CG10802; tyf; mRpL33; mRpL30; RpL35; CG5941; Spt6; RpL7A; schlank; RpL17; NA; Gclc; RpS6; CG2263; RpS28b; Aats-lys; mRpL54; RpL29; CG10306; mRpS29; RpS16; bonsai; RpL23; RpS24; eIF2B-delta; mRpL43; l(2)efl; eIF-5A; RpL12; RpL39; Not11; eIF6; mRpS17; RpL19; key; Aats-tyr-m; mRpL17; mRpL46; RpL23A; HBS1; mRpL23; RpL…
GO:0008582	4.15769e-07	2.87022	30.4417	54	93	regulation of synaptic growth at neuromuscular junction	1.14824e-06	SkpA; sgg; Fas2; Rae1; gbb; HSPC300; Eps-15; trio; alpha-Spec; Src64B; dlg1; caz; beta-Spec; Cdc42; gig; Rab8; Abp1; RhoGAP68F; simj; Arp3; LanA; cpb; kis; Arfip; Nsf2; Akt1; Patr-1; RhoGAP92B; Synd; Rab11; CASK; spas; atl; WASp; Cul5; Med; Cul2; Tbce; Mob4; ena; unc-104; Cdk5; scb; Galphao; Acsl; Mob2; TBPH; futsch; mnb; Ank2; PI4KIIIalpha; nwk; raptor; Src42A
GO:1904396	4.15769e-07	2.87022	30.4417	54	93	regulation of neuromuscular junction development	1.14824e-06	SkpA; sgg; Fas2; Rae1; gbb; HSPC300; Eps-15; trio; alpha-Spec; Src64B; dlg1; caz; beta-Spec; Cdc42; gig; Rab8; Abp1; RhoGAP68F; simj; Arp3; LanA; cpb; kis; Arfip; Nsf2; Akt1; Patr-1; RhoGAP92B; Synd; Rab11; CASK; spas; atl; WASp; Cul5; Med; Cul2; Tbce; Mob4; ena; unc-104; Cdk5; scb; Galphao; Acsl; Mob2; TBPH; futsch; mnb; Ank2; PI4KIIIalpha; nwk; raptor; Src42A
GO:0072593	4.18135e-07	7.08165	10.1472	24	31	reactive oxygen species metabolic process	1.15252e-06	Sesn; Jafrac2; Jafrac1; Cat; Sod; Prx6005; Rheb; Wwox; Tor; p38b; Fdh; Prx3; Pi3K92E; p38a; Sod2; SelD; Prx2540-2; Prx2540-1; Rel; Prx5; Sod3; CG31028; Duox; Ccs
GO:0009888	4.37284e-07	1.35913	409.162	488	1250	tissue development	1.20296e-06	alpha-Cat; Rbf; CG13366; dor; mip130; usp; csw; crn; sgg; Rala; Femcoat; Fas2; CHOp24; ctp; RhoGAP5A; spoon; CG5966; sqh; Mcm6; Inx2; ct; sn; mys; fs(1)h; slpr; Cp36; Nrg; Moe; Dsor1; Zpr1; Bx42; Idgf4; flw; Act57B; cpa; shg; Egfr; clt; Fkbp14; px; Vps20; vir; wmd; gbb; Lpt; Galphas; eIF-5A; gammaSnap1; tsr; Chi; spag; Nop60B; zip; Pdk1; fwd; trio; Sac1; Rabex-5; Myo61F; Rac1; Cct1; Patj; alpha-S…
GO:0003006	4.38358e-07	1.40365	325.693	397	995	developmental process involved in reproduction	1.20357e-06	alpha-Cat; CkIIalpha; Rbf; dor; mip130; usp; csw; sgg; Rala; Femcoat; Fas2; ctp; snf; spoon; Act5C; sqh; wuho; Mcm6; Inx2; ct; sn; mys; slpr; Cp36; Moe; Dsor1; Yp1; Yp2; flw; ras; cpa; shg; sktl; mago; tud; Egfr; Vps20; blw; vir; Dcp-1; gbb; tsr; DCP1; Zfrp8; Nop60B; zip; Pdk1; E(bx); Myo61F; cue; pUf68; Rac1; Cct1; alpha-Spec; R; ecd; msn; Hsp83; kst; Ubi-p63E; Rop; Rpd3; Src64B; sesB; Dlic; dsh…
GO:0006906	4.92707e-07	6.45545	10.8019	25	33	vesicle fusion	1.34756e-06	Sec22; dor; p115; Vti1; nSyb; comt; car; alphaSnap; Syx13; SH3PX1; Membrin; Sec5; Rab5; Rbsn-5; Vps16A; Vps45; Vps39; Gos28; Rab11; Syx1A; Vps33B; Vps16B; CDase; Vamp7; lt
GO:0071166	4.92707e-07	6.45545	10.8019	25	33	ribonucleoprotein complex localization	1.34756e-06	sta; Ns3; Nmd3; Torsin; RpS28b; mago; thoc5; Nxt1; thoc7; sbr; thoc6; msk; Trn-SR; tho2; Hpr1; Hel25E; Nup107; Nup160; sqd; Nup133; Nup75; JhI-1; tsu; Mys45A; CG14749
GO:0060255	5.14976e-07	1.32205	503.433	589	1538	regulation of macromolecule metabolic process	1.40575e-06	CkIIalpha; elav; SkpA; Rbf; CG14786; MED18; mip130; east; usp; CG14812; csw; Pgd; pn; CG3071; crn; msta; wds; Zw10; sgg; eIF2B-beta; Rala; tyf; CG2982; Cbp80; rb; snf; Cdk7; RhoGAP5A; CG4119; CG4078; MAPk-Ak2; CG5941; Spt6; schlank; CG3198; ct; NELF-B; fs(1)h; slpr; e(r); HP1b; dalao; Dsor1; flw; PPP4R2r; Ipod; Atg8a; cpa; CG30291; mago; NC2alpha; CG10306; MED23; eIF2B-delta; vir; l(2)efl; Rrp4; …
GO:0006928	5.18865e-07	1.51077	208.182	266	636	movement of cell or subcellular component	1.41363e-06	CkIIalpha; AMPKalpha; DAAM; dor; usp; csw; crn; Rala; Vap-33A; Fas2; ctp; Ptp4E; spoon; sqh; Marf; ct; sn; mys; Nrg; Ppt1; Moe; Dsor1; fh; ras; cpa; shg; Egfr; CycB; l(2)06496; vir; tsr; Chi; betaTub60D; uzip; zip; trio; Sac1; Rac1; Klp61F; alpha-Spec; R; msn; pav; Rpd3; Src64B; dyl; Dlic; dsh; hop; Klp10A; Ptp10D; bif; Evi5; mew; Jafrac1; Lsd-2; shi; sl; Rok; if; beta-Spec; par-6; fu; Vav; Cdc42…
GO:0032269	5.28463e-07	2.21145	52.7001	83	161	negative regulation of cellular protein metabolic process	1.43426e-06	CkIIalpha; SkpA; CG14812; Zw10; sgg; Rala; flw; cpa; eIF2B-delta; Not11; Sac1; Patj; CG12082; par-6; Rcd-1; Spn77Ba; Mkp3; endos; vih; Pop2; Cbl; Unr; Srp9; mad2; Thor; cpb; ebi; l(2)gl; Chro; Rga; kra; PEK; Spn27A; Hrb27C; Mnn1; Spn28Dc; raw; Cks30A; Cand1; Utx; bsk; ics; UK114; alphaTub84B; alphaTub85E; Not10; sqd; eff; Spn88Ea; CSN5; ATPsyn-d; twin; 4EHP; crb; msi; alph; Bub3; faf; krz; heph; …
GO:0051248	5.28463e-07	2.21145	52.7001	83	161	negative regulation of protein metabolic process	1.43426e-06	CkIIalpha; SkpA; CG14812; Zw10; sgg; Rala; flw; cpa; eIF2B-delta; Not11; Sac1; Patj; CG12082; par-6; Rcd-1; Spn77Ba; Mkp3; endos; vih; Pop2; Cbl; Unr; Srp9; mad2; Thor; cpb; ebi; l(2)gl; Chro; Rga; kra; PEK; Spn27A; Hrb27C; Mnn1; Spn28Dc; raw; Cks30A; Cand1; Utx; bsk; ics; UK114; alphaTub84B; alphaTub85E; Not10; sqd; eff; Spn88Ea; CSN5; ATPsyn-d; twin; 4EHP; crb; msi; alph; Bub3; faf; krz; heph; …
GO:0048284	5.55218e-07	3.66856	19.9671	39	61	organelle fusion	1.50398e-06	Sec22; dor; Marf; p115; Snap29; Vti1; nSyb; Syx17; comt; car; polo; alphaSnap; NA; Syx13; SH3PX1; Membrin; Sec5; Rab5; CG2023; Rbsn-5; Vps16A; Vps45; Vps39; Gos28; Rab11; Syx1A; atl; Vps33B; Vha100-1; Vps16B; CDase; Opa1; rho-7; TER94; Vps25; Vps28; Vamp7; lt; msps
GO:0007033	5.58654e-07	5.96847	11.4565	26	35	vacuole organization	1.51039e-06	dor; Vps26; rb; cm; or; Snap29; Syx17; g; car; CG14184; NA; SH3PX1; Atg18a; Rab14; CG11975; Vps16A; Vps45; Vps39; Vha100-1; Vps16B; Atg9; Vps25; Vps28; Vamp7; lt; mv
GO:0030030	5.72518e-07	1.47407	236.005	297	721	cell projection organization	1.54493e-06	CkIIalpha; Appl; AMPKalpha; CG11448; DAAM; rush; usp; Vinc; lva; Fas2; Ptp4E; sqh; ct; sn; mys; Nrg; Ppt1; Moe; ras; cpa; shg; Egfr; HmgD; GM130; babos; tsr; Chi; HSPC300; betaTub60D; uzip; zip; E(bx); trio; Sac1; Myo61F; Rac1; alpha-Spec; alphaCOP; R; MEP-1; msn; Strip; CG12082; prominin-like; Rpd3; Src64B; Con; Dlic; dsh; Ran; Gtp-bp; Ptp10D; bif; fw; mew; Bap60; CG2691; ben; Rok; SMC3; if; bet…
GO:0035071	5.77141e-07	2.93553	28.4777	51	87	salivary gland cell autophagic cell death	1.55148e-06	CG5254; ctp; Atg5; sktl; Dcp-1; eIF-5A; CG3829; zip; emp; mri; Eip63F-1; CG14995; CtsB1; CG7860; Cyp1; rept; ftz-f1; Eip71CD; AGO2; Dronc; eIF-4E; MED24; crq; l(2)gl; eRF1; Hr78; Itp-r83A; Atg17; CG9769; santa-maria; Akap200; raw; Utx; bel; CG8149; Ect3; Mdh2; Rab7; Atg6; BRWD3; Ef1gamma; Obp99b; Cp1; NAT1; Cam; cathD; eIF4G2; larp; bun; Ack-like; IP3K2
GO:0048102	5.77141e-07	2.93553	28.4777	51	87	autophagic cell death	1.55148e-06	CG5254; ctp; Atg5; sktl; Dcp-1; eIF-5A; CG3829; zip; emp; mri; Eip63F-1; CG14995; CtsB1; CG7860; Cyp1; rept; ftz-f1; Eip71CD; AGO2; Dronc; eIF-4E; MED24; crq; l(2)gl; eRF1; Hr78; Itp-r83A; Atg17; CG9769; santa-maria; Akap200; raw; Utx; bel; CG8149; Ect3; Mdh2; Rab7; Atg6; BRWD3; Ef1gamma; Obp99b; Cp1; NAT1; Cam; cathD; eIF4G2; larp; bun; Ack-like; IP3K2
GO:0006903	5.78956e-07	30.9357	5.23728	15	16	vesicle targeting	1.5534e-06	X11L; Sec3; Nrx-IV; Exo70; Sec5; Sec8; Sec23; Gos28; Sec15; CASK; Sar1; Sec10; Exo84; Sec6; Sec16
GO:0045595	6.72929e-07	1.81295	93.6163	133	286	regulation of cell differentiation	1.7984e-06	sdk; DAAM; usp; csw; sgg; lva; Ppt1; mago; Egfr; GM130; babos; zip; trio; Rac1; Rop; Rpd3; Dlic; dsh; hop; dlg1; bif; Pdcd4; exd; CG3560; sl; mbt; Rok; CG9634; RhoGAPp190; Ulp1; Cdc42; polo; trc; MED11; Lasp; brm; blue; Atg1; Dronc; fry; pbl; lqf; Rac2; MED4; Rcc1; Elp3; morgue; ed; lwr; l(2)gl; Arf79F; Sec23; MED31; chic; PDZ-GEF; Liprin-alpha; Hrb27C; mts; Pvr; numb; Pka-C1; mdy; Pax; Lar; CoIV…
GO:0006401	6.7408e-07	4.02186	17.3485	35	53	RNA catabolic process	1.7984e-06	nonC; Upf2; Not11; Upf3; DCP1; Pym; Upf1; Rcd-1; pcm; Pop2; pix; RNaseX25; CG2091; Rga; pelo; piwi; Smg5; l(2)35Df; RnpS1; Not10; sqd; Patr-1; tst; twin; Dis3; CG11337; Not3; AGO1; CG8777; PAN2; Pabp2; gw; Not1; cu; Rrp6
GO:1903649	6.7408e-07	4.02186	17.3485	35	53	regulation of cytoplasmic transport	1.7984e-06	sgg; CHOp24; GAA1; Crag; Act57B; Nup214; pav; Stim; U2af50; fu; Arl1; Trn; Rcc1; Sec23; noi; CG7214; PIG-U; cact; Cas; swm; Fs(2)Ket; eca; Kap-alpha3; Su(fu); mbo; Akt1; Rab11; Sar1; Cnx99A; dco; Diap2; Cam; Cul4; Sec16; PIG-S
GO:0006836	6.77721e-07	2.28754	47.4628	76	145	neurotransmitter transport	1.80453e-06	Vap-33A; cm; AP-1gamma; Synj; gbb; or; gammaSnap1; Snap29; Letm1; Eps-15; nSyb; Rop; Syx17; Tomosyn; comt; HDAC6; Chc; X11L; AP-1-2beta; Clc; alphaSnap; Sec3; Arl1; Syx13; Nrx-IV; Exo70; lqf; Syx16; Sec5; Snapin; l(2)gl; Csp; Arf79F; Sec8; Gdi; Stam; Syx5; BicD; Dap160; Arl2; Vps45; AP-1mu; Snap24; gammaSnap2; Nsf2; Hsc70-4; EndoA; Dys; Synd; Sec15; AP-2sigma; CASK; AP-2mu; AP-1sigma; Sec10; Syx1…
GO:0051240	6.78933e-07	2.07969	60.8833	93	186	positive regulation of multicellular organismal process	1.80453e-06	RpL22; Ns3; lva; CG3527; Top3beta; Rbm13; Dsor1; fh; CG7246; GM130; gbb; CG3608; Pdk1; trio; Rac1; CG11583; dsh; dlg1; lic; ben; CG8939; caz; mbt; trc; Lasp; Abp1; Atg1; RhoGAP68F; simj; Dronc; Fdxh; Arp3; pbl; vito; Prpk; morgue; Sec24CD; cpb; dbe; ebi; kis; CG7338; Cdk12; Sec23; RpL35A; chic; Acer; Tor; p38b; Mcm10; Dap160; Ras85D; Tctp; Arfip; RpL24-like; Akt1; Pak3; Ns1; RhoGAP92B; Pi3K92E; S…
GO:0009306	6.95154e-07	4.13624	16.6938	34	51	protein secretion	1.84418e-06	deltaCOP; CHOp24; Tango5; Tango11; Klp61F; Gtp-bp; p24-1; Tango4; Tango13; Tango2; opm; Use1; Sec24CD; Tango14; Madm; CG9175; Tango1; Syx5; dia; eca; Tango9; Snx3; RhoGAP92B; Rab1; Sar1; AdipoR; Atg6; CG5484; wbl; unc-104; Tango7; garz; sel; pst
GO:0043161	7.92939e-07	2.21592	50.7361	80	155	proteasome-mediated ubiquitin-dependent protein catabolic process	2.09966e-06	Edem1; wds; Zw10; sgg; Moe; Prosalpha3; Rpn8; slik; CG12082; ida; Rpt3; CG2247; CkIalpha; shtd; Prosalpha4; Rpn1; l(3)76BDr; Rpn12; Prosbeta6; Prosbeta2; vih; Rpt4R; Ube3a; Ufd1-like; Uch-L5; mad2; Rpt6; morgue; Rpn10; Chro; Rpn5; Prosbeta7; Ubc6; Rpn11; Cks30A; Prosalpha6; Edem2; Prosbeta4; Cdc23; Pomp; alphaTub84B; Prosbeta3; alphaTub85E; FBXO11; tws; Prosalpha2; eff; CSN5; CG5823; Rpn7; Cdc16;…
GO:0032006	7.96854e-07	12.3805	6.87392	18	21	regulation of TOR signaling	2.10608e-06	AMPKalpha; CG14812; CG14977; gig; CG14184; NA; Atg1; Prpk; mio; Rheb; CG5110; RagA-B; ATPsyn-d; hppy; RagC-D; Cul1; Nup44A; PIP4K
GO:1990778	8.26473e-07	7.57059	9.16523	22	28	protein localization to cell periphery	2.18028e-06	GAA1; Crag; shi; Cdc42; Sec5; Sec24CD; l(2)gl; Sec23; PIG-U; TM9SF4; lkb1; fray; mira; Rab11; Sec15; Sar1; Exo84; CG5447; Sec6; arm; aPKC; PIG-S
GO:0050803	8.46296e-07	2.18426	52.3728	82	160	regulation of synapse structure or activity	2.22842e-06	SkpA; sgg; Fas2; Top3beta; Act57B; Rae1; Synj; gbb; HSPC300; Eps-15; trio; Rac1; alpha-Spec; Src64B; dlg1; comt; shi; CG9172; caz; beta-Spec; Cdc42; gig; Rab8; Abp1; Atg1; RhoGAP68F; Sod; simj; Arp3; LanA; Thor; Rab5; cpb; aru; kis; Sec8; Tor; p38b; RtGEF; Arfip; Nsf2; Sra-1; Atx2; Akt1; Pak3; Patr-1; EndoA; Dys; RhoGAP92B; Pi3K92E; Synd; CG3822; Rab11; CASK; Nrx-1; spas; atl; WASp; Cul5; Med; Cu…
GO:0043067	8.58822e-07	2.10248	57.9374	89	177	regulation of programmed cell death	2.2572e-06	SkpA; Rbf; CG14812; csw; Egfr; spag; zip; Pdk1; Jafrac2; CG12082; rept; PDCD-5; fwe; Vps36; SRm160; Atg1; viaf; Dronc; pix; RpL14; msk; MED24; vito; Sep1; morgue; ebi; CG2789; l(2)gl; CG5059; Hdac3; Ubc6; Aatf; Pvr; Su(var)205; l(2)k12914; Pka-C1; Dref; RnrL; Utx; CIAPIN1; mdy; Aac11; ik2; Mcm10; MAGE; bel; Ras85D; Bruce; Tango9; lkb1; Akt1; Prx3; PP2A-B'; Mdh2; Naam; psidin; lsn; RpS3; mask; BRW…
GO:0060284	8.88753e-07	1.91166	76.5952	112	234	regulation of cell development	2.33153e-06	sdk; DAAM; csw; lva; Ppt1; mago; Egfr; GM130; babos; trio; Rac1; Rop; Rpd3; Dlic; dsh; dlg1; bif; CG3560; mbt; Rok; RhoGAPp190; Cdc42; polo; trc; MED11; Lasp; brm; blue; Atg1; Dronc; fry; pbl; Rac2; MED4; Rcc1; Elp3; morgue; ed; l(2)gl; Sec23; MED31; chic; PDZ-GEF; Liprin-alpha; Hrb27C; mts; numb; Pka-C1; mdy; Lar; CoIV; Mcm10; Dap160; MAGE; Ras85D; MED6; tws; Bruce; CG5214; sals; CoVa; eff; Akt1…
GO:0032880	9.38326e-07	2.85585	28.805	51	88	regulation of protein localization	2.45702e-06	sgg; CHOp24; GAA1; Crag; Act57B; Nup214; pav; CG1657; Ran; Gtp-bp; p24-1; opm; Stim; fu; Mi-2; Arl1; Galphai; Trn; Su(dx); kis; noi; CG7214; PIG-U; Cdk1; cact; Cas; Fs(2)Ket; eca; Kap-alpha3; Snx3; Su(fu); mbo; Akt1; RhoGAP92B; Rab11; Rab1; Sar1; AdipoR; crb; jar; dco; unc-104; Diap2; bic; Cam; sel; Cul4; ACC; gw; Sec16; PIG-S
GO:0031401	9.45042e-07	2.45184	39.2796	65	120	positive regulation of protein modification process	2.47004e-06	Pgd; CG3198; slpr; Dsor1; mago; Lpt; slik; Rabex-5; Rac1; Cdc37; msn; Strip; Src64B; lic; ben; mbt; fu; gig; CG14184; CG10754; fry; Fnta; ebi; Cdk12; Atg17; ksr; betaggt-I; smt3; Mnn1; Cka; Pvr; Su(var)205; Tor; p38b; Dap160; eIF4AIII; Mkk4; M1BP; Ras85D; Tctp; Pp1-87B; Abi; Sur-8; Pk92B; Pli; ALiX; CG4849; krz; Mob4; hppy; Prp19; Atg9; drk; Fbl6; 14-3-3zeta; CG11107; Crk; Caper; Hrs; gfzf; Slmap…
GO:0007268	9.51828e-07	1.84397	85.7604	123	262	synaptic transmission	2.4799e-06	Vap-33A; nonC; cm; Upf2; Ppt1; AP-1gamma; Synj; Dcp-1; gbb; Galphas; or; gammaSnap1; Snap29; Letm1; Eps-15; alpha-Spec; nSyb; scramb2; Rop; Syx17; nAChRbeta1; sesB; dlg1; Tomosyn; comt; HDAC6; shi; Chc; X11L; beta-Spec; Cdc42; AP-1-2beta; Clc; alphaSnap; Sec3; Arl1; Syx13; Atg1; Nrx-IV; scramb1; Exo70; lqf; Syx16; Sec5; Snapin; Pgk; l(2)gl; Csp; Arf79F; Sec8; Ent2; Pka-C1; Gdi; Stam; Rab6; Syx5; …
GO:0007254	9.52324e-07	3.4491	20.9491	40	64	JNK cascade	2.4799e-06	SkpA; sgg; Rala; MAPk-Ak2; slpr; flw; cpa; Sac1; Rac1; msn; CG12082; Src64B; ben; Cdc42; syd; Rac2; cpb; ebi; Mnn1; Cka; Btk29A; raw; bsk; ics; Mkk4; lkb1; Pk92B; XNP; Mtl; ALiX; alph; hppy; Atg9; Rho1; shark; egr; Jra; Crk; Alg-2; Src42A
GO:0042176	1.02519e-06	3.50864	20.2944	39	62	regulation of protein catabolic process	2.66474e-06	wds; Zw10; sgg; ida; CkIalpha; REG; Rpn1; vih; Ufd1-like; mad2; Chro; Cks30A; l(2)gd1; Cdc23; Pomp; alphaTub84B; alphaTub85E; pic; CSN5; Bdbt; Cdc16; crb; Rpn2; Bub3; dco; BubR1; Mtor; PI31; Fbl6; TER94; Su(var)2-10; Mad1; Cul4; CSN4; Lon; ctrip; CG31687; Rpn3; gus
GO:0002164	1.0392e-06	2.21914	49.4268	78	151	larval development	2.69621e-06	deltaCOP; sgg; mys; Moe; flw; asrij; Gale; Rac1; alpha-Spec; ecd; Eip63E; hop; dlg1; Set2; Top1; CG5800; Ulp1; Adgf-A; Aats-gly; caps; prc; SrpRbeta; Surf1; Trn; NA; Elp3; Rrp40; lwr; l(2)gl; Mes2; Sec23; CG1129; Scox; eIF-4a; lid; chic; Pvr; ck; Syx5; crp; sas; bel; CG8149; Ras85D; Mical; SelR; foxo; blp; CSN5; sds22; Pi3K92E; EloB; ppan; Sar1; unk; Sec13; mbc; Nup98-96; jar; BM-40-SPARC; Noa36;…
GO:0007276	1.04459e-06	1.38058	337.15	407	1030	gamete generation	2.70521e-06	alpha-Cat; CkIIalpha; Rbf; dor; mip130; usp; csw; sgg; Rala; Femcoat; ctp; snf; spoon; Act5C; sqh; wuho; Mcm6; Inx2; ct; sn; mys; slpr; Cp36; Moe; Dsor1; Yp1; Yp2; flw; ras; cpa; shg; sktl; mago; tud; Egfr; Rae1; Vps20; blw; vir; Dcp-1; gbb; tsr; DCP1; Zfrp8; Nop60B; uri; zip; Pdk1; fwd; E(bx); cue; pUf68; Rac1; Cct1; alpha-Spec; R; ecd; msn; Hsp83; kst; Ubi-p63E; Rop; Rpd3; Src64B; sesB; Dlic; d…
GO:0071426	1.15173e-06	6.1957	10.4746	24	32	ribonucleoprotein complex export from nucleus	2.97723e-06	sta; Ns3; Nmd3; Torsin; RpS28b; mago; thoc5; Nxt1; thoc7; sbr; thoc6; Trn-SR; tho2; Hpr1; Hel25E; Nup107; Nup160; sqd; Nup133; Nup75; JhI-1; tsu; Mys45A; CG14749
GO:0007265	1.17102e-06	2.0786	58.2647	89	178	Ras protein signal transduction	3.02023e-06	Rab35; Rala; Rab18; CG3198; Rab39; Crag; Dsor1; mago; Rap2l; CG3402; RabX6; trio; Rabex-5; Cdc37; R; msn; Strip; Ras64B; CG1657; vap; Graf; Rok; RhoGAPp190; Cdc42; Rab8; MESR6; RhoGAP71E; CG10754; ArfGAP1; RhoGAP68F; Rac2; RhoGAP19D; Rab10; Fnta; Rab5; siz; Cdk12; Arf79F; ksr; betaggt-I; smt3; Cka; Akap200; Rab6; Sec71; Rab14; Lrch; MESR3; eIF4AIII; M1BP; Sbf; Lk6; Pp1-87B; rin; flfl; f-cup; Sur-…
GO:0070646	1.17264e-06	3.64479	18.9851	37	58	protein modification by small protein removal	3.02023e-06	CG4165; CG3016; CG3781; CG30421; CG32479; CG12082; Usp7; CG7288; Ulp1; CSN1b; CG7857; Uch-L5; velo; Ubp64E; CG4603; Uch; CSN3; CG9769; Rpn11; smt3; CSN8; alien; CG4968; CG5384; CYLD; CSN5; Ubpy; CSN6; Usp12-46; puf; CG2224; faf; krz; Den1; CSN7; CSN4; bur
GO:0007293	1.22272e-06	2.40223	40.2616	66	123	germarium-derived egg chamber formation	3.14351e-06	alpha-Cat; Inx2; flw; cpa; shg; Vps20; alpha-Spec; Src64B; Pdcd4; shi; rngo; par-6; fu; Cdc42; dome; CSN1b; Vps60; TSG101; nudE; pbl; Rab5; mio; l(2)gl; CSN3; CG7470; Hsp60C; Btk29A; alien; Cdk1; Rab6; Tor; Arpc1; BicD; sqd; CSN5; Ppcs; Rab11; Cortactin; mRpL35; AP-2mu; Ime4; Sce; Apc; Cul5; rig; Lis-1; Dg; Rcd1; AGO1; nclb; 14-3-3zeta; tsu; Vps25; CSN7; Vps28; Nup44A; chb; Stat92E; arm; egl; Csk…
GO:0043043	1.23298e-06	1.42276	272.011	335	831	peptide biosynthetic process	3.16413e-06	RpL22; RpL36; CG14786; sta; mRpL16; eIF2B-epsilon; mRpL14; CG8636; tko; eIF2B-beta; CG10802; tyf; mRpL33; mRpL30; RpL35; CG5941; Spt6; RpL7A; RpL17; NA; Gclc; RpS6; CG2263; RpS28b; Aats-lys; mRpL54; RpL29; CG10306; mRpS29; RpS16; bonsai; RpL23; RpS24; eIF2B-delta; mRpL43; l(2)efl; eIF-5A; RpL12; RpL39; Not11; eIF6; mRpS17; RpL19; key; Aats-tyr-m; mRpL17; mRpL46; RpL23A; HBS1; mRpL23; RpL8; Aats-p…
GO:0032984	1.24475e-06	3.72312	18.3305	36	56	macromolecular complex disassembly	3.18854e-06	cpa; eIF-5A; tsr; Pym; fwd; Klp61F; alpha-Spec; HBS1; CG12082; Klp10A; comt; beta-Spec; alphaSnap; flr; Klp67A; cpb; eRF1; Csp; Sec8; aux; Gel; CG6094; Elf; CG5705; fws; bru; Mical; Nsf2; twf; spas; atl; Exo84; Patronin; shot; mlt; chb
GO:0006446	1.251e-06	16.5011	5.89194	16	18	regulation of translational initiation	3.19875e-06	eIF2B-beta; CG5941; CG10306; eIF2B-delta; l(2)efl; CG9099; Hsp67Bc; mxt; Thor; Ddx1; eIF3-S10; Irp-1B; Irp-1A; eIF2B-alpha; eIF3-S9; eIF-3p66
GO:0031344	1.29369e-06	2.63802	32.733	56	100	regulation of cell projection organization	3.30194e-06	DAAM; lva; Ppt1; cpa; GM130; babos; tsr; HSPC300; trio; Rac1; Rpd3; Dlic; dsh; bif; Rok; par-6; RhoGAPp190; Cdc42; trc; fry; Arp3; pbl; Rac2; Elp3; cpb; Sec23; kra; chic; Liprin-alpha; SCAR; Arpc1; CG5869; Lar; dia; twf; Akt1; psidin; Pi3K92E; Rab1; Sar1; spas; CHORD; Cad99C; Adf1; ena; RhoGEF2; unc-104; Rho1; Lis-1; shot; stan; PlexA; TBPH; Pten; aPKC; Imp
GO:0006733	1.37745e-06	3.90598	17.0211	34	52	oxidoreduction coenzyme metabolic process	3.50939e-06	Pgd; l(1)G0334; COQ7; Hex-A; Tal; CG12016; CG17333; CG2453; CG9940; Gapdh2; Pfrx; Zw; CG32174; ImpL3; CG3714; Pgk; Eno; CG7277; Gpdh; CG9249; Mical; Nmnat; Ald; Pglym78; Tpi; Dg; Gpo-1; Pfk; Pgi; Gapdh1; CG30493; CG30499; Gdh; Rpi
GO:0035150	1.4338e-06	4.01359	16.3665	33	50	regulation of tube size	3.6464e-06	pck; deltaCOP; Fas2; sqh; Nrg; zip; dsh; Chc; serp; Nrx-IV; crim; sinu; CG3921; Sec24CD; cold; mmy; nrv2; raw; crok; Gli; knk; kune; cora; Rho1; conv; garz; Lac; stan; Atpalpha; vari; grh; verm; tnc
GO:0048639	1.46199e-06	2.65082	32.0783	55	98	positive regulation of developmental growth	3.7114e-06	RpL22; Ns3; CG3527; Rbm13; Dsor1; CG7246; gbb; CG3608; Pdk1; trio; Rac1; CG11583; dsh; dlg1; lic; CG8939; caz; trc; Abp1; RhoGAP68F; simj; Arp3; vito; Prpk; cpb; dbe; ebi; kis; CG7338; Cdk12; RpL35A; Tor; p38b; Tctp; Arfip; RpL24-like; Akt1; Ns1; RhoGAP92B; Pi3K92E; Synd; tsl; spas; CG7006; Med; Ns2; shot; stan; Rs1; CG5033; PIP4K; Wbp2; mnb; Ank2; raptor
GO:0048599	1.48119e-06	2.10251	55.3187	85	169	oocyte development	3.7534e-06	CkIIalpha; Moe; flw; shg; sktl; mago; tud; Egfr; DCP1; alpha-Spec; Hsp83; Rop; CkIIbeta; lic; Chc; Rok; par-6; Lasp; blue; fry; Rac2; ndl; Sec5; l(2)gl; Hem; jagn; lost; Scox; chic; Hrb27C; Rbsn-5; Pka-C1; Ge-1; Rab6; BicD; vls; ik2; E2f2; eIF4AIII; Ras85D; poly; lkb1; sqd; ea; asun; CSN5; mira; Rab11; lsn; Syx1A; bai; spz; btz; spn-F; Gprk2; heph; TBCB; wbl; pAbp; stau; Khc; Lis-1; Dg; scb; bic;…
GO:0034331	1.49652e-06	Inf	3.92796	12	12	cell junction maintenance	3.77872e-06	RhoGAP5A; Rac1; Patj; shi; Rac2; CG3921; Rab11; crb; jar; p120ctn; rl; Csk
GO:0061343	1.49652e-06	Inf	3.92796	12	12	cell adhesion involved in heart morphogenesis	3.77872e-06	Nrg; Gbeta13F; Nrx-IV; prc; sinu; Cont; nrv2; Gli; cora; Lac; Galphao; Ggamma1
GO:0009124	1.50654e-06	4.82134	13.0932	28	40	nucleoside monophosphate biosynthetic process	3.79047e-06	l(1)G0230; ras; blw; sesB; ade5; ms(3)72Dt; ATPsyn-b; CG6767; Prat2; Ts; ade2; ade3; l(2)06225; CG2846; Prat; Adk3; CG3321; Oscp; Dhfr; ATPsyn-d; r-l; ATPsyn-Cf6; ATPsyn-gamma; CG1746; ATPsyn-beta; mt:ATPase6; bur; AMPdeam
GO:0044272	1.50654e-06	4.82134	13.0932	28	40	sulfur compound biosynthetic process	3.79047e-06	GlcAT-I; Gclc; oxt; CG11134; pdgy; CG4306; sgl; sfl; Cbs; CG12173; CG9804; CG5261; CG8199; CG14721; Gclm; CG6178; beta4GalT7; CG11876; CG11334; botv; Eip55E; Sam-S; NA; CG32068; CG17691; Las; ATPCL
GO:0035151	1.51368e-06	4.27196	15.0572	31	46	regulation of tube size, open tracheal system	3.80168e-06	pck; deltaCOP; Fas2; sqh; Nrg; zip; dsh; Chc; serp; Nrx-IV; crim; sinu; CG3921; Sec24CD; cold; mmy; nrv2; crok; Gli; knk; kune; cora; Rho1; conv; garz; Lac; stan; Atpalpha; vari; grh; verm
GO:0051223	1.55512e-06	3.26341	21.9311	41	67	regulation of protein transport	3.89192e-06	sgg; CHOp24; GAA1; Crag; Act57B; Nup214; pav; CG1657; Gtp-bp; p24-1; opm; Stim; fu; Arl1; Trn; noi; CG7214; PIG-U; cact; Cas; Fs(2)Ket; eca; Kap-alpha3; Snx3; Su(fu); mbo; Akt1; RhoGAP92B; Rab11; Rab1; Sar1; AdipoR; crb; dco; unc-104; Diap2; Cam; sel; Cul4; Sec16; PIG-S
GO:0051403	1.55512e-06	3.26341	21.9311	41	67	stress-activated MAPK cascade	3.89192e-06	SkpA; sgg; Rala; MAPk-Ak2; slpr; flw; cpa; Sac1; Rac1; msn; CG12082; Src64B; ben; Cdc42; syd; Rac2; cpb; ebi; Mnn1; Cka; Btk29A; raw; bsk; ics; Mkk4; lkb1; Pk92B; XNP; Mtl; ALiX; alph; hppy; Atg9; Rho1; shark; egr; Jra; CG11107; Crk; Alg-2; Src42A
GO:0006891	1.60445e-06	8.25574	8.18324	20	25	intra-Golgi vesicle-mediated transport	4.00829e-06	Golgin245; Gmap; alphaSnap; Arl1; CG7197; Membrin; Cog3; Sec71; fws; bru; Nsf2; ldlCp; SIDL; Gos28; KrT95D; wbl; garz; CG1968; Bet3; GCC185
GO:1901700	1.6958e-06	1.86706	78.2318	113	239	response to oxygen-containing compound	4.22903e-06	SkpA; usp; CG14812; Fas2; CG3011; slpr; fh; Egfr; Cyp6d2; Sesn; Lpt; Galphas; Nurf-38; zip; Pdk1; E(bx); RpL8; PHGPx; CG14977; ImpL2; PGRP-SA; Set2; Clic; pdgy; vap; CG9172; sl; CG9099; Tao; gig; CG14184; rept; Cat; ftz-f1; rogdi; l(3)neo18; Sod; aay; CG3967; Hsp67Bc; MED24; Bacc; dock; aru; l(2)gl; pzg; kra; Spn27A; Pvr; Akap200; fu12; Aldh; Pka-C1; Utx; bsk; p38b; CG5110; sgll; bel; CG17734; Ar…
GO:0048667	1.79241e-06	1.56227	157.773	206	482	cell morphogenesis involved in neuron differentiation	4.46208e-06	CkIIalpha; AMPKalpha; DAAM; usp; lva; Fas2; Ptp4E; ct; mys; Nrg; Ppt1; Moe; ras; shg; HmgD; GM130; babos; tsr; Chi; betaTub60D; uzip; E(bx); trio; Sac1; Rac1; Patj; alpha-Spec; MEP-1; msn; Strip; Rpd3; Src64B; Dlic; dsh; Gtp-bp; Ptp10D; bif; mew; Bap60; ben; Rok; if; beta-Spec; RhoGAPp190; Vav; Ulp1; Cdc42; Mi-2; trc; asf1; fz2; MED11; ftz-f1; Dab; Nrt; CG9705; mbf1; fax; Taf4; brm; Aats-gly; dlp…
GO:0010498	1.86139e-06	2.12952	52.3728	81	160	proteasomal protein catabolic process	4.62566e-06	Edem1; wds; Zw10; sgg; Moe; Prosalpha3; Rpn8; slik; CG12082; ida; Rpt3; CG2247; CkIalpha; REG; shtd; Prosalpha4; Rpn1; l(3)76BDr; Rpn12; Prosbeta6; Prosbeta2; vih; Rpt4R; Ube3a; Ufd1-like; Uch-L5; mad2; Rpt6; morgue; Rpn10; Chro; Rpn5; Prosbeta7; Ubc6; Rpn11; Cks30A; Prosalpha6; Edem2; Prosbeta4; Cdc23; Pomp; alphaTub84B; Prosbeta3; alphaTub85E; FBXO11; tws; Prosalpha2; eff; CSN5; CG5823; Rpn7; C…
GO:0018958	1.9917e-06	3.03604	24.2224	44	74	phenol-containing compound metabolic process	4.92903e-06	Torsin; Nrg; t; yellow-d; Dat; Trh; Rac1; Flo2; Hayan; Vav; Cdc42; Spn77Ba; Gl; Dronc; Shc; Rac2; ple; LanA; MP1; Spn27A; Spn28Dc; bsk; yellow-c; yellow-b; Catsup; dia; Sp7; RhoL; yellow-f2; yellow-e; poly; Manf; Tl; Eb1; Rho1; Cdk5; egr; 14-3-3zeta; PPO2; yellow-h; Pten; Exn; aPKC; Skeletor
GO:0043410	1.9917e-06	3.03604	24.2224	44	74	positive regulation of MAPK cascade	4.92903e-06	Pgd; CG3198; slpr; Dsor1; mago; Cdc37; msn; Strip; lic; ben; mbt; CG14184; CG10754; Fnta; Cdk12; ksr; betaggt-I; smt3; Mnn1; Cka; Pvr; eIF4AIII; Mkk4; M1BP; Ras85D; Pp1-87B; Sur-8; Pk92B; ALiX; CG4849; Mob4; hppy; Prp19; Atg9; drk; 14-3-3zeta; CG11107; Crk; Caper; gfzf; Slmap; rl; Alg-2; Rab3-GEF
GO:0016079	1.99741e-06	3.41782	19.9671	38	61	synaptic vesicle exocytosis	4.92903e-06	Vap-33A; gammaSnap1; nSyb; Rop; Syx17; Tomosyn; comt; Chc; X11L; alphaSnap; Sec3; Syx13; Nrx-IV; Exo70; Syx16; Sec5; Snapin; l(2)gl; Csp; Sec8; Syx5; BicD; Vps45; gammaSnap2; Nsf2; Sec15; CASK; Sec10; Syx1A; Esyt2; Exo84; CDase; Sec6; Syb; stmA; Hrs; Caps; Unc-13-4B
GO:0098722	1.99741e-06	3.41782	19.9671	38	61	asymmetric stem cell division	4.92903e-06	ric8a; Sara; zip; dlg1; Gbeta13F; eas; par-6; Cdc42; dally; Galphai; l(2)gl; eIF-4a; mts; numb; pelo; Cdk1; piwi; aurB; l(2)gd1; loqs; Sgt1; tws; lkb1; flfl; eff; mira; twin; jar; pins; ALiX; Ote; stau; clu; cnn; shrb; Ggamma1; aPKC; mud
GO:1901215	2.00217e-06	7.22469	8.8379	21	27	negative regulation of neuron death	4.93217e-06	Appl; spag; pix; RpL14; msk; ebi; aux; Aldh; MAGE; Akt1; Naam; psidin; RpS3; hpo; pAbp; Drep-2; TBPH; tefu; futsch; Lrrk; tau
GO:0035295	2.07582e-06	1.41066	273.32	335	835	tube development	5.10472e-06	CG13366; csw; crn; sgg; Fas2; CHOp24; ctp; RhoGAP5A; Act5C; CG5966; sqh; Inx2; ct; sn; mys; fs(1)h; slpr; Nrg; Moe; Zpr1; Bx42; Idgf4; flw; cpa; shg; Egfr; clt; Fkbp14; px; wmd; gbb; Lpt; Galphas; eIF-5A; gammaSnap1; tsr; Chi; spag; Nop60B; zip; Pdk1; trio; Rabex-5; Myo61F; Rac1; Cct1; dlt; ecd; msn; ImpE2; ida; dsh; hop; dlg1; bif; fw; pot; dy; Amun; ade5; mew; Set2; l(1)G0007; Lsd-2; exd; Stim;…
GO:0032456	2.10111e-06	11.6898	6.54659	17	20	endocytic recycling	5.15794e-06	MICAL-like; RhoGAP68F; CG3338; Sec5; Rab5; Ubc6; mtm; Tor; Rab14; ik2; AP-1mu; Sbf; Past1; gish; Sec15; Exo84; Sec6
GO:1902533	2.18738e-06	2.19277	47.7901	75	146	positive regulation of intracellular signal transduction	5.36041e-06	CG14812; Pgd; CG3198; slpr; Dsor1; mago; trio; Cdc37; msn; Jafrac2; Strip; CG14977; lic; ben; mbt; Tao; CG14184; NA; CG10960; CG10754; CG8108; Taf2; Prpk; wap; Fnta; CG31694; Ipk2; Cdk12; Rheb; ksr; betaggt-I; smt3; Mnn1; Cka; Pvr; RtGEF; eIF4AIII; Mkk4; M1BP; RagA-B; Ras85D; CG12213; Pp1-87B; Sur-8; Pk92B; mask; BRWD3; ALiX; CG4849; Gprk2; Mob4; hppy; Prp19; RhoGEF2; Atg9; drk; Git; 14-3-3zeta; …
GO:0071417	2.31656e-06	3.54541	18.6578	36	57	cellular response to organonitrogen compound	5.66714e-06	SkpA; CG14812; Atg5; Pdk1; RpL8; Atg2; CG14977; ImpL2; pdgy; CG9099; gig; CG14184; Atg3; Atg1; Atg18a; dock; Atg17; Pvr; CG5110; poly; foxo; GlyS; Akt1; Ns1; Pi3K92E; Atg6; Lnk; Atg16; dj-1beta; hppy; CG5189; Atg9; RagC-D; Cul1; Pten; Pi3K21B
GO:0042981	2.32145e-06	2.16028	49.4268	77	151	regulation of apoptotic process	5.66932e-06	SkpA; Rbf; CG14812; csw; Egfr; spag; Pdk1; Jafrac2; CG12082; PDCD-5; fwe; Vps36; Atg1; viaf; Dronc; pix; RpL14; msk; MED24; vito; Sep1; morgue; ebi; CG2789; CG5059; Hdac3; Ubc6; Pvr; Su(var)205; l(2)k12914; Pka-C1; Dref; RnrL; CIAPIN1; mdy; Aac11; ik2; Mcm10; MAGE; Ras85D; Bruce; Tango9; lkb1; Akt1; Prx3; PP2A-B'; Mdh2; Naam; psidin; lsn; RpS3; mask; Drice; dco; qless; hpo; hppy; Diap2; Tango7; D…
GO:0031098	2.43411e-06	3.10424	22.9131	42	70	stress-activated protein kinase signaling cascade	5.93419e-06	SkpA; sgg; Rala; MAPk-Ak2; slpr; flw; cpa; Sac1; Rac1; msn; CG12082; Src64B; ben; Cdc42; syd; Rac2; cpb; ebi; Mnn1; Cka; Btk29A; raw; CYLD; bsk; ics; Mkk4; lkb1; Pk92B; XNP; Mtl; ALiX; alph; hppy; Atg9; Rho1; shark; egr; Jra; CG11107; Crk; Alg-2; Src42A
GO:0009653	2.57392e-06	1.26856	631.419	719	1929	anatomical structure morphogenesis	6.26425e-06	alpha-Cat; CkIIalpha; Appl; sdk; Rbf; CG13366; AMPKalpha; CG11448; DAAM; rush; mip130; east; Actn; usp; Pgam5; deltaCOP; csw; pn; crn; Vinc; sgg; Rala; lva; cib; Femcoat; Fas2; ctp; Ptp4E; RhoGAP5A; spoon; Act5C; GAA1; MAPk-Ak2; Rab18; CG5966; sqh; Marf; Mcm6; Inx2; ct; sn; mys; fs(1)h; slpr; Cp36; Nrg; Ppt1; Moe; ric8a; Zpr1; NA; flw; ras; cpa; shg; Egfr; clt; Fkbp14; HmgD; GM130; px; babos; Vps…
GO:0044702	2.80063e-06	1.34913	362.027	431	1106	single organism reproductive process	6.80429e-06	alpha-Cat; CkIIalpha; Rbf; dor; mip130; usp; csw; sgg; Rala; Femcoat; Fas2; ctp; snf; spoon; Act5C; sqh; wuho; Mcm6; Inx2; ct; sn; mys; slpr; Cp36; Moe; Dsor1; Yp1; Yp2; flw; ras; cpa; shg; sktl; mago; tud; Egfr; Rae1; Vps20; blw; vir; Dcp-1; gbb; tsr; Nap1; DCP1; Zfrp8; Nop60B; uri; zip; Peb; Pdk1; fwd; E(bx); Myo61F; cue; pUf68; Rac1; Cct1; alpha-Spec; R; ecd; msn; Hsp83; kst; Ubi-p63E; Rop; Rp…
GO:0016333	2.92892e-06	3.891	16.0392	32	49	morphogenesis of follicular epithelium	7.10376e-06	csw; spoon; shg; Egfr; Patj; Src64B; dlg1; Grasp65; CSN1b; Cbl; l(2)gl; CSN3; alien; rin; sqd; CSN5; sds22; Ppcs; CSN6; Ime4; crb; jar; Sce; Cul2; Dg; Dp; CSN7; CSN4; Parp; aPKC; kug; awd
GO:0022411	2.95878e-06	2.911	25.2044	45	77	cellular component disassembly	7.1639e-06	cpa; Sesn; eIF-5A; tsr; Pym; fwd; Klp61F; alpha-Spec; HBS1; CG12082; Klp10A; comt; beta-Spec; alphaSnap; HLH106; CG6878; flr; Sod; Klp67A; obst-A; cpb; eRF1; Csp; Sec8; Ubc6; aux; Gel; pelo; CG6094; Elf; CG5705; fws; bru; Mical; Nsf2; twf; spas; atl; Exo84; Patronin; Sod2; Hsc70-5; shot; mlt; chb
GO:0016081	3.03262e-06	9.28423	7.20125	18	22	synaptic vesicle docking	7.31761e-06	nSyb; Syx17; X11L; Sec3; Syx13; Nrx-IV; Exo70; Syx16; Sec5; Sec8; Syx5; Sec15; CASK; Sec10; Syx1A; Exo84; Sec6; Syb
GO:0070972	3.03262e-06	9.28423	7.20125	18	22	protein localization to endoplasmic reticulum	7.31761e-06	TRAM; Gtp-bp; SsRbeta; Srp68; SrpRbeta; Srp9; Sec63; Srp19; Srp54k; Sec61alpha; Trp1; KdelR; Srp72; CG10420; Sec61beta; Tapdelta; Sec16; Srp14
GO:0003007	3.08722e-06	5.16312	11.4565	25	35	heart morphogenesis	7.43667e-06	Nrg; shg; dsh; Gbeta13F; Cat; Nrx-IV; prc; sinu; Cont; nrv2; LanB1; Acer; p38b; Gli; p38a; cora; Sod2; Lac; Galphao; Ggamma1; ci; arm; rl; yki; sli
GO:0006402	3.15611e-06	4.13314	14.7298	30	45	mRNA catabolic process	7.58969e-06	nonC; Upf2; Not11; Upf3; DCP1; Pym; Upf1; Rcd-1; pcm; Pop2; pix; CG2091; Rga; pelo; piwi; Smg5; RnpS1; Not10; sqd; Patr-1; twin; CG11337; Not3; AGO1; CG8777; PAN2; Pabp2; gw; Not1; cu
GO:0002165	3.17193e-06	1.47326	202.29	255	618	instar larval or pupal development	7.61479e-06	CG13366; usp; deltaCOP; sgg; cib; Fas2; ctp; RhoGAP5A; CG5966; sqh; Marf; ct; sn; mys; fs(1)h; slpr; Nrg; Moe; fh; flw; Egfr; clt; Fkbp14; px; wmd; gbb; Lpt; Galphas; tsr; Chi; spag; zip; Pdk1; E(bx); trio; Rabex-5; Myo61F; Rac1; Cct1; Patj; alpha-Spec; dlt; ecd; msn; Atg2; Eip63E; ImpE2; dsh; hop; dlg1; bif; fw; pot; dy; ade5; mew; Set2; l(1)G0007; Lsd-2; CG9503; CG9509; CG9512; Top1; Stim; Rok;…
GO:0031929	3.20268e-06	4.88212	12.1112	26	37	TOR signaling	7.67557e-06	AMPKalpha; CG14812; Mipp2; Lst8; CG14977; gig; CG14184; NA; Atg1; Shc; Prpk; mio; Rheb; Pvr; CG5110; RagA-B; Ras85D; ATPsyn-d; Lnk; hppy; drk; RagC-D; Cul1; Nup44A; PIP4K; raptor
GO:0009060	3.22962e-06	4.2802	14.0752	29	43	aerobic respiration	7.72705e-06	spoon; kdn; l(1)G0255; Scsalpha; Rpd3; CG5599; HDAC6; l(1)G0156; CG7430; Nc73EF; Surf1; Sucb; smt3; barr; Acon; skap; CG5214; SdhC; Mdh2; CG6439; CG5028; CG1544; SdhB; vimar; SdhA; Gdh; mt:CoI; mt:CoIII; Src42A
GO:0009156	3.26038e-06	4.648	12.7659	27	39	ribonucleoside monophosphate biosynthetic process	7.77433e-06	l(1)G0230; ras; blw; sesB; ade5; ms(3)72Dt; ATPsyn-b; CG6767; Prat2; ade2; ade3; l(2)06225; CG2846; Prat; Adk3; CG3321; Oscp; Dhfr; ATPsyn-d; r-l; ATPsyn-Cf6; ATPsyn-gamma; CG1746; ATPsyn-beta; mt:ATPase6; bur; AMPdeam
GO:0035010	3.26038e-06	4.648	12.7659	27	39	encapsulation of foreign target	7.77433e-06	Nrg; Rac1; hop; Flo2; Vav; Cdc42; Gl; Shc; Rac2; LanA; Spn27A; Ostgamma; TM9SF4; dia; alpha-Man-II; RhoL; poly; alpha-Man-IIb; alpha-Man-Ib; Eb1; Cdk5; PPO2; OstDelta; Pten; alpha-Man-I; Exn; aPKC
GO:0009994	3.38733e-06	1.97104	61.8653	92	189	oocyte differentiation	8.06345e-06	CkIIalpha; Moe; flw; cpa; shg; sktl; mago; tud; Egfr; DCP1; alpha-Spec; Hsp83; Rop; CkIIbeta; lic; Chc; Rok; par-6; polo; Lasp; blue; nudE; fry; Rac2; ndl; Sec5; mio; l(2)gl; Hem; jagn; lost; Scox; chic; Hrb27C; Rbsn-5; Pka-C1; Ge-1; Rab6; BicD; vls; ik2; E2f2; eIF4AIII; Ras85D; poly; lkb1; sqd; ea; Atx2; asun; CSN5; mira; Rab11; lsn; Syx1A; bai; spz; btz; spn-F; Gprk2; heph; TBCB; wbl; pAbp; sta…
GO:0006901	3.41722e-06	15.466	5.56461	15	17	vesicle coating	8.09371e-06	rb; cm; AP-1gamma; or; Chc; AP-1-2beta; Clc; Sec23; AP-1mu; AP-2sigma; Sar1; AP-2mu; AP-1sigma; AP-2alpha; Sec16
GO:0044403	3.41722e-06	15.466	5.56461	15	17	symbiosis, encompassing mutualism through parasitism	8.09371e-06	CG14812; Cbp80; Hexo2; NA; TSG101; AGO2; Sec61alpha; Rack1; ref(2)P; Cbp20; Rab7; Ars2; TER94; shrb; Vps28
GO:0044419	3.41722e-06	15.466	5.56461	15	17	interspecies interaction between organisms	8.09371e-06	CG14812; Cbp80; Hexo2; NA; TSG101; AGO2; Sec61alpha; Rack1; ref(2)P; Cbp20; Rab7; Ars2; TER94; shrb; Vps28
GO:0006414	3.95625e-06	7.84102	7.85591	19	24	translational elongation	9.35475e-06	eIF-5A; CG33158; RpS17; GAPsec; Srp9; RpS21; RpLP1; ico; eEF1delta; CG6412; CG4849; Ef1gamma; RpS8; EF2; RpLP2; EfTuM; Ef1alpha48D; CG12736; Ef1beta
GO:0016568	3.99787e-06	1.81105	80.1958	114	245	chromatin modification	9.43739e-06	CG11412; wds; CG2982; Act5C; HP1b; dalao; Sgf29; Lpt; Nap1; Nurf-38; E(bx); CG2469; Rpd3; Usp7; Chrac-16; Bap60; Set2; Top1; HDAC6; Nup153; e(y)1; Arp8; Prp3; Mi-2; rept; Chd3; brm; Trl; ptip; JIL-1; msl-3; Ubp64E; Bre1; Elp3; Taf10b; ebi; Rbbp5; CG2051; Snr1; Hcs; Hdac3; atms; Hel25E; lid; Gas41; Mnn1; LKR; Su(var)205; Wdr82; borr; Bka; Utx; Dpy-30L1; Art8; aurB; crol; NC2beta; CG8036; hyx; Ibf1…
GO:0070201	4.08138e-06	2.99684	23.2404	42	71	regulation of establishment of protein localization	9.61846e-06	sgg; CHOp24; GAA1; Crag; Act57B; Nup214; pav; CG1657; Gtp-bp; p24-1; opm; Stim; fu; Arl1; Trn; noi; CG7214; PIG-U; cact; Cas; Fs(2)Ket; eca; Kap-alpha3; Snx3; Su(fu); mbo; Akt1; RhoGAP92B; Rab11; Rab1; Sar1; AdipoR; crb; dco; unc-104; Diap2; bic; Cam; sel; Cul4; Sec16; PIG-S
GO:1901701	4.16885e-06	2.65497	29.1323	50	89	cellular response to oxygen-containing compound	9.80825e-06	SkpA; usp; CG14812; slpr; Lpt; Nurf-38; Pdk1; E(bx); RpL8; CG14977; ImpL2; Set2; pdgy; CG9099; gig; CG14184; Sod; dock; pzg; Pvr; Utx; bsk; p38b; CG5110; poly; foxo; GlyS; Akt1; Ns1; Pi3K92E; p38a; Lnk; dj-1beta; hppy; CG5189; Sod2; CG8317; Galphaq; Iswi; RagC-D; Cul1; ACC; Drat; Stat92E; Pten; Sod3; Pdxk; rl; Ccs; Pi3K21B
GO:0006206	4.58025e-06	Inf	3.60063	11	11	pyrimidine nucleobase metabolic process	1.07226e-05	CG17896; su(r); Adk1; b; pyd3; Dhod; ry; r-l; Dak1; CRMP; r
GO:0007184	4.58025e-06	Inf	3.60063	11	11	SMAD protein import into nucleus	1.07226e-05	Nup214; Nup93-1; Nup153; Nup205; Nup107; Nup160; Sec13; Nup98-96; Nup358; Nup75; Nup50
GO:0016080	4.58025e-06	Inf	3.60063	11	11	synaptic vesicle targeting	1.07226e-05	X11L; Sec3; Nrx-IV; Exo70; Sec5; Sec8; Sec15; CASK; Sec10; Exo84; Sec6
GO:0043069	4.70921e-06	2.67	28.4777	49	87	negative regulation of programmed cell death	1.10063e-05	SkpA; Rbf; CG14812; csw; Egfr; spag; Pdk1; CG12082; pix; RpL14; msk; vito; ebi; Hdac3; Ubc6; Aatf; Pvr; l(2)k12914; CIAPIN1; Aac11; Mcm10; MAGE; Ras85D; Bruce; Tango9; Akt1; Prx3; PP2A-B'; Naam; psidin; RpS3; mask; Apc; dco; qless; hpo; Diap2; Galphaq; Cul1; TBPH; Prx5; tefu; futsch; rl; Dredd; yki; bun; Duox; CG42593
GO:0043903	4.76851e-06	26.7977	4.58262	13	14	regulation of symbiosis, encompassing mutualism through parasitism	1.11265e-05	Cbp80; Hexo2; NA; TSG101; AGO2; Sec61alpha; Rack1; Cbp20; Rab7; Ars2; TER94; shrb; Vps28
GO:0016053	4.78725e-06	2.82245	25.5317	45	78	organic acid biosynthetic process	1.11335e-05	CG3011; CG10932; mtacp1; Gad1; CG2543; CG1673; CG11134; CG6891; HLH106; beg; CG9674; Baldspot; Pex3; aay; CG8005; Cbs; Got2; Gs1; P5CDh1; CG7470; CG12170; CG12173; CG31523; CG9804; CG12264; CG6746; b; CG1315; Nmdmc; pug; Dhfr; P5cr-2; P5cr; CG4335; CG11899; CG11334; Got1; SelD; ACC; CG10602; CG9510; CG32068; Las; CG17486; CG17374
GO:0046394	4.78725e-06	2.82245	25.5317	45	78	carboxylic acid biosynthetic process	1.11335e-05	CG3011; CG10932; mtacp1; Gad1; CG2543; CG1673; CG11134; CG6891; HLH106; beg; CG9674; Baldspot; Pex3; aay; CG8005; Cbs; Got2; Gs1; P5CDh1; CG7470; CG12170; CG12173; CG31523; CG9804; CG12264; CG6746; b; CG1315; Nmdmc; pug; Dhfr; P5cr-2; P5cr; CG4335; CG11899; CG11334; Got1; SelD; ACC; CG10602; CG9510; CG32068; Las; CG17486; CG17374
GO:0010033	4.86548e-06	1.58202	135.187	178	413	response to organic substance	1.12969e-05	SkpA; usp; Edem1; CG14812; csw; Fas2; Cbp80; CG3011; CG3016; Atg5; slpr; Sara; Egfr; Cyp6d2; gbb; Lpt; Galphas; MAN1; Nurf-38; zip; Pdk1; E(bx); trio; RpL8; Atg2; PHGPx; CG14977; ImpL2; Chd64; PGRP-SA; lic; Set2; Clic; pdgy; vap; sl; CG9099; fu; kek5; Cdc42; Tao; gig; CG14184; rept; Atg3; Cat; ftz-f1; rogdi; AGO2; CG8745; Atg1; nst; aay; CG3967; Hsp67Bc; GNBP3; dally; Atg18a; MED24; sgl; sfl; Dd;…
GO:0009451	5.23789e-06	3.59025	17.0211	33	52	RNA modification	1.21416e-05	CG4045; Nsun2; CG3527; wuho; CG4038; CG4610; Nop60B; CG32281; CG8939; NHP2; CG6745; CG3709; CG9596; CG7818; CG13090; CG6388; l(2)35Bc; mtTFB2; CG5220; CG11447; CG4159; Ime4; CG18528; CG14544; CG11837; CG6550; Hen1; CG7637; CG8078; Mt2; CG33276; CG15618; mtTFB1
GO:0035099	5.49587e-06	10.9994	6.21927	16	19	hemocyte migration	1.2698e-05	sn; mys; shg; Rac1; R; if; Cdc42; Rac2; PDZ-GEF; Pvr; Ras85D; RhoL; spas; Mtl; Rho1; chb
GO:0072528	5.49587e-06	10.9994	6.21927	16	19	pyrimidine-containing compound biosynthetic process	1.2698e-05	e(r); su(r); nmdyn-D6; Adk1; Ts; pyd3; Dhod; CG14721; r-l; Dak1; CG5757; l(2)k01209; CRMP; r; awd; CTPsyn
GO:0044262	5.54174e-06	3.10268	21.2764	39	65	cellular carbohydrate metabolic process	1.27831e-05	kdn; Hex-A; Treh; Pfrx; CG7328; Pgm; CG17029; CG17027; Tollo; Atg1; Galk; sgl; sfl; Tps1; GlyP; CG9391; CG12582; CG5171; CG5177; Rack1; CG8475; Ipp; foxo; GlyS; CG3534; Plip; botv; Dg; Gpo-1; AGBE; ACC; Inos; Pten; PhKgamma; Ide; CG6910; l(1)G0196; 5PtaseI; ATPCL
GO:0010562	5.74241e-06	2.34628	36.9883	60	113	positive regulation of phosphorus metabolic process	1.32029e-05	Pgd; CG3198; slpr; Dsor1; mago; Galphas; slik; Rac1; Cdc37; msn; Strip; Src64B; sesB; lic; ben; mbt; gig; CG14184; CG10754; fry; Fnta; Cdk12; Atg17; ksr; betaggt-I; smt3; Mnn1; Cka; Pvr; Tor; p38b; bsf; Dap160; eIF4AIII; Mkk4; M1BP; Ras85D; Tctp; Pp1-87B; Abi; Sur-8; Pk92B; crb; ALiX; CG4849; Mob4; hppy; Prp19; Atg9; drk; 14-3-3zeta; CG11107; Crk; Caper; gfzf; Slmap; rl; Alg-2; Rab3-GEF; raptor
GO:0045937	5.74241e-06	2.34628	36.9883	60	113	positive regulation of phosphate metabolic process	1.32029e-05	Pgd; CG3198; slpr; Dsor1; mago; Galphas; slik; Rac1; Cdc37; msn; Strip; Src64B; sesB; lic; ben; mbt; gig; CG14184; CG10754; fry; Fnta; Cdk12; Atg17; ksr; betaggt-I; smt3; Mnn1; Cka; Pvr; Tor; p38b; bsf; Dap160; eIF4AIII; Mkk4; M1BP; Ras85D; Tctp; Pp1-87B; Abi; Sur-8; Pk92B; crb; ALiX; CG4849; Mob4; hppy; Prp19; Atg9; drk; 14-3-3zeta; CG11107; Crk; Caper; gfzf; Slmap; rl; Alg-2; Rab3-GEF; raptor
GO:0006367	6.00307e-06	2.87027	24.2224	43	74	transcription initiation from RNA polymerase II promoter	1.37798e-05	NC2alpha; MED23; TfIIEbeta; Rbp1-like; caz; e(y)1; Taf6; Taf4; Taf2; MED24; MED4; Taf10b; MED15; CycH; MED1; Ssl1; MED31; Gas41; x16; Srp54; TfIIB; Rsf1; NC2beta; Taf7; M1BP; MED6; Rbp1; TfIIFbeta; MED7; Taf12; B52; MED17; Arc42; MED25; TfIIA-S; TfIIA-L; MED8; Tfb1; Taf5; Mat1; MED26; SC35; MED10
GO:0007298	6.02336e-06	2.24617	40.9162	65	125	border follicle cell migration	1.3804e-05	dor; usp; Rala; spoon; sqh; mys; Dsor1; shg; Egfr; vir; tsr; zip; Rac1; dsh; hop; Evi5; shi; sl; if; par-6; dome; flr; CalpB; nudE; Cbl; Sec5; Rab5; cpb; CG4552; kis; Sec8; stai; Hrb27C; Pvr; bsk; CG6509; Ced-12; Gli; CG5869; Mhc; Catsup; Ras85D; RhoL; twf; psidin; Rab11; Sec15; Cortactin; CASK; mbc; jar; cindr; hpo; ena; Sec6; Rho1; Lis-1; Rme-8; Crk; Stat92E; Hrs; mim; bbg; yki; rhea
GO:0006749	6.23566e-06	3.87435	15.0572	30	46	glutathione metabolic process	1.42673e-05	Gclc; GstE12; Ggt-1; CG4306; GstO3; GstO1; GstO2; GstT3; GstZ2; GstZ1; GstD4; GstD5; GstD1; GstD9; GstD10; Gclm; GstE1; GstE3; GstE6; GstE7; GstE9; GstE11; Eip55E; GstE10; GstS1; GstT1; GstT2; GstE13; NA
GO:0032990	6.35828e-06	1.44556	210.146	262	642	cell part morphogenesis	1.45244e-05	CkIIalpha; Appl; AMPKalpha; CG11448; DAAM; rush; usp; Vinc; lva; Fas2; Ptp4E; Marf; ct; sn; mys; Nrg; Ppt1; Moe; ras; shg; HmgD; GM130; babos; tsr; Chi; betaTub60D; Letm1; uzip; E(bx); trio; Sac1; Rac1; alpha-Spec; alphaCOP; MEP-1; msn; Strip; CG12082; prominin-like; Rpd3; Src64B; Dlic; dsh; Ran; Gtp-bp; Ptp10D; bif; mew; Bap60; CG2691; ben; Rok; if; beta-Spec; RhoGAPp190; Vav; Ulp1; Cdc42; alpha…
GO:0030866	6.51302e-06	3.99438	14.4025	29	44	cortical actin cytoskeleton organization	1.48539e-05	Ocrl; Moe; sktl; tsr; slik; Rac1; pav; shi; Cdc42; polo; Pi3K68D; pbl; Galphai; Hem; Arpc4; mtm; chic; SCAR; Arpc2; dia; Sbf; Abi; Sra-1; Rab11; Rho1; Galphao; pnut; Rab21; moody
GO:0006405	6.53722e-06	5.27588	10.4746	23	32	RNA export from nucleus	1.48851e-05	sta; RpS28b; mago; thoc5; Nxt1; thoc7; sbr; U2af50; thoc6; Trn-SR; tho2; Hpr1; Hel25E; Nup107; Nup160; swm; sqd; Nup133; Nup75; JhI-1; tsu; Phax; CG14749
GO:0046486	6.63229e-06	2.49483	31.751	53	97	glycerolipid metabolic process	1.50531e-05	Ocrl; CG4406; Vap-33A; GAA1; CG3160; schlank; sws; CG11190; sktl; Synj; fwd; Sac1; Cct1; CG12006; CG15743; rdgB; CG14411; pdgy; eas; CG9784; CG17029; CG17027; Pi3K68D; CG6707; CdsA; Dd; Thor; Plc21C; CG4825; CG9391; Pi4KIIalpha; Gpdh; PIG-U; mdy; Mtp; ry; Ipp; CG33331; Pi3K92E; CG7789; CG2201; CG6805; Taz; CG2292; Lpin; ACC; Pten; PIP4K; CG30381; 5PtaseI; PI4KIIIalpha; Pi3K21B; PIG-S
GO:0051146	6.63229e-06	2.49483	31.751	53	97	striated muscle cell differentiation	1.50531e-05	CG13366; DAAM; Actn; mys; Act57B; zip; Rac1; Rok; if; Vav; Lasp; Smn; flr; Prm; Arp3; Rac2; ImpL3; fliI; Thor; Pgk; dock; siz; Hem; Cg25C; LanB1; SCAR; Ced-12; Tor; Mhc; mib2; Pax; Mlp84B; Mical; sals; foxo; Akt1; Pak3; how; mbc; WASp; Pglym78; Tpi; Khc; Rho1; Dg; Arf51F; Mp20; Pfk; Gapdh1; Crk; Mlc2; rhea; hts
GO:0031123	6.72001e-06	3.18805	19.9671	37	61	RNA 3'-end processing	1.52277e-05	elav; CG11418; sta; IntS6; IntS1; sbr; Rbp1-like; IntS2; IntS9; defl; CG3689; RpS21; Clp; Sym; x16; Srp54; Rsf1; piwi; bsf; swm; Nbr; CG1091; CG16790; Rbp1; B52; omd; asun; Cpsf73; Cpsf100; IntS11; hrg; cbc; JhI-1; Pabp2; Cpsf160; SC35; Rrp6
GO:0043087	6.76088e-06	2.72033	26.5137	46	81	regulation of GTPase activity	1.52958e-05	Ocrl; RhoGAP5A; Crag; CG1657; Evi5; vap; Vav; gig; ArfGAP1; GAPcenA; GAPsec; pbl; CG7261; CG31935; CG4552; drongo; Tbc1d15-17; CG7324; ArfGAP3; Sec23; CG9135; PDZ-GEF; Ced-12; Pax; RtGEF; bru; CG10068; CG8449; SIDL; CG5916; RhoGAP92B; Rlip; CG5745; mbc; CG5521; garz; Git; Orc6; CG8243; Crk; Asap; CG17883; RhoGAP102A; CG4041; plx; spg
GO:0051028	6.81638e-06	4.95537	11.1292	24	34	mRNA transport	1.53967e-05	Cbp80; mago; thoc5; Nxt1; thoc7; sbr; Dlic; Gl; thoc6; Trn-SR; tho2; Hpr1; Hel25E; Nup107; Nup160; BicD; sqd; Nup133; ncd; Nup75; tsu; Dmn; CG14749; egl
GO:0070925	6.90177e-06	1.76427	83.4691	117	255	organelle assembly	1.55427e-05	CG13366; DAAM; sta; mip130; Actn; mys; CG7033; Prosalpha3; LSm1; Nap1; DCP1; eIF6; zip; Non2; Rcd5; pav; CG11583; Klp10A; Tcp-1zeta; if; Grip84; pcm; polo; TSG101; Lasp; Smn; mop; Gl; flr; Zmynd10; SH3PX1; RpS17; Klp67A; Prm; Atg18a; pbl; mad2; Klp64D; fliI; mst; gammaTub23C; CG10874; mTerf3; CG7338; Prosbeta7; ifc; mts; emb; Cks30A; borr; pelo; me31B; aurB; Ge-1; CG5525; Rab14; Mhc; dia; Mlp84B;…
GO:0019915	6.90298e-06	4.28995	13.0932	27	40	lipid storage	1.55427e-05	Roc1a; AMPKalpha; deltaCOP; rb; blw; CG9186; alphaCOP; ImpL2; Lsd-2; betaCOP; Indy; zetaCOP; CdsA; Rac2; CG10671; Su(dx); Arf79F; Ubc2; beta'COP; mdy; alpha-Est7; foxo; Akt1; p38c; Acsl; Pten; ltd
GO:0009615	6.95915e-06	4.69319	11.7839	25	36	response to virus	1.56194e-05	PebIII; key; Vago; hop; AGO2; Ufd1-like; Atg18a; DIP1; CG7172; Rm62; Sec61alpha; r2d2; me31B; CG10333; Npl4; Atg7; imd; Dcr-2; TER94; Rel; Stat92E; Mt2; Dredd; fd68A; ird5
GO:0031346	6.95915e-06	4.69319	11.7839	25	36	positive regulation of cell projection organization	1.56194e-05	DAAM; lva; GM130; HSPC300; Rac1; dsh; par-6; Cdc42; Arp3; Sec23; kra; chic; SCAR; Arpc1; Akt1; psidin; Rab1; Sar1; spas; ena; shot; stan; TBPH; aPKC; Imp
GO:0043066	7.61552e-06	2.73911	25.859	45	79	negative regulation of apoptotic process	1.70385e-05	SkpA; Rbf; CG14812; csw; Egfr; spag; Pdk1; CG12082; pix; RpL14; msk; vito; ebi; Hdac3; Ubc6; Pvr; l(2)k12914; CIAPIN1; Aac11; Mcm10; MAGE; Ras85D; Bruce; Tango9; Akt1; Prx3; PP2A-B'; Naam; psidin; RpS3; mask; dco; qless; hpo; Diap2; Cul1; TBPH; Prx5; tefu; futsch; rl; yki; bun; Duox; CG42593
GO:0043414	7.61552e-06	2.73911	25.859	45	79	macromolecule methylation	1.70385e-05	CG4045; wds; Nsun2; CG3527; wuho; Ipod; Lpt; CG32281; Set2; CG8939; ptip; Rbbp5; CG9531; CG9596; Mnn1; LKR; CG7818; Su(var)205; Wdr82; Utx; Dpy-30L1; Art8; Art4; mtTFB2; Art1; Sbf; Caf1; Art3; CG5220; CG11447; Ime4; ash2; vig2; CG14544; BEAF-32; Hen1; Ntmt; Hcf; csul; Mt2; Set1; Art7; CG15618; yki; CoRest
GO:0030032	7.64422e-06	8.76628	6.87392	17	21	lamellipodium assembly	1.70488e-05	cpa; tsr; HSPC300; Rac1; dsh; par-6; Cdc42; Arp3; Rac2; cpb; SCAR; twf; Abi; psidin; Mtl; ena; aPKC
GO:0097581	7.64422e-06	8.76628	6.87392	17	21	lamellipodium organization	1.70488e-05	cpa; tsr; HSPC300; Rac1; dsh; par-6; Cdc42; Arp3; Rac2; cpb; SCAR; twf; Abi; psidin; Mtl; ena; aPKC
GO:0002168	8.34643e-06	2.95496	22.2584	40	68	instar larval development	1.85856e-05	deltaCOP; sgg; Moe; flw; Rac1; alpha-Spec; ecd; Eip63E; dlg1; Set2; Top1; caps; SrpRbeta; Surf1; NA; Elp3; l(2)gl; Mes2; Sec23; Scox; eIF-4a; chic; ck; sas; bel; Ras85D; blp; sds22; Pi3K92E; Sar1; Sec13; jar; BM-40-SPARC; Apc; krz; Cyt-b5; Pten; arm; egl; rad50
GO:0007444	9.15643e-06	1.41691	228.149	281	697	imaginal disc development	2.03572e-05	CG13366; csw; sgg; Fas2; CHOp24; ctp; RhoGAP5A; CG5966; sqh; ct; sn; mys; fs(1)h; slpr; Nrg; Moe; Bx42; Idgf4; flw; cpa; Egfr; clt; Fkbp14; px; wmd; gbb; Lpt; Galphas; eIF-5A; gammaSnap1; tsr; Chi; spag; Nop60B; zip; Pdk1; trio; Rabex-5; Myo61F; Rac1; Cct1; dlt; msn; ImpE2; ida; dsh; hop; dlg1; bif; fw; pot; dy; Amun; ade5; mew; Set2; l(1)G0007; Lsd-2; exd; Stim; Rok; SMC3; Pp2B-14D; if; CG6398; …
GO:0071310	9.21989e-06	1.81685	72.9945	104	223	cellular response to organic substance	2.04661e-05	SkpA; usp; Edem1; CG14812; csw; Cbp80; Atg5; slpr; Sara; gbb; Lpt; MAN1; Nurf-38; Pdk1; E(bx); RpL8; Atg2; CG14977; ImpL2; Chd64; lic; Set2; pdgy; CG9099; fu; kek5; Cdc42; gig; CG14184; Atg3; ftz-f1; AGO2; Atg1; nst; dally; Atg18a; sgl; sfl; Dd; dock; Spp; lwr; l(2)gl; pzg; CG7172; Hr78; Atg17; smt3; r2d2; Pvr; Utx; Stam; Edem2; loqs; p38b; CG5110; Nbr; CG1091; poly; foxo; GlyS; Hsc70-4; FK506-bp…
GO:0016185	9.26864e-06	14.4314	5.23728	14	16	synaptic vesicle budding from presynaptic membrane	2.05421e-05	rb; cm; AP-1gamma; or; shi; Chc; AP-1-2beta; Clc; Drp1; AP-1mu; AP-2sigma; AP-2mu; AP-1sigma; AP-2alpha
GO:0009163	9.53084e-06	3.41033	17.3485	33	53	nucleoside biosynthetic process	2.10243e-05	l(1)G0230; ras; Ppcdc; blw; sesB; nmdyn-D6; Adgf-A; ms(3)72Dt; ATPsyn-b; CG3434; Ppat-Dpck; Tgt; fbl; CG5828; l(2)06225; Dpck; Adk3; Adgf-D; CG3321; Oscp; ATPsyn-d; Ppcs; r-l; ATPsyn-Cf6; ATPsyn-gamma; CG1746; ATPsyn-beta; Aprt; Sam-S; mt:ATPase6; bur; awd; CTPsyn
GO:0042455	9.53084e-06	3.41033	17.3485	33	53	ribonucleoside biosynthetic process	2.10243e-05	l(1)G0230; ras; Ppcdc; blw; sesB; nmdyn-D6; Adgf-A; ms(3)72Dt; ATPsyn-b; CG3434; Ppat-Dpck; Tgt; fbl; CG5828; l(2)06225; Dpck; Adk3; Adgf-D; CG3321; Oscp; ATPsyn-d; Ppcs; r-l; ATPsyn-Cf6; ATPsyn-gamma; CG1746; ATPsyn-beta; Aprt; Sam-S; mt:ATPase6; bur; awd; CTPsyn
GO:1901659	9.53084e-06	3.41033	17.3485	33	53	glycosyl compound biosynthetic process	2.10243e-05	l(1)G0230; ras; Ppcdc; blw; sesB; nmdyn-D6; Adgf-A; ms(3)72Dt; ATPsyn-b; CG3434; Ppat-Dpck; Tgt; fbl; CG5828; l(2)06225; Dpck; Adk3; Adgf-D; CG3321; Oscp; ATPsyn-d; Ppcs; r-l; ATPsyn-Cf6; ATPsyn-gamma; CG1746; ATPsyn-beta; Aprt; Sam-S; mt:ATPase6; bur; awd; CTPsyn
GO:0031532	9.65847e-06	7.4265	7.52858	18	23	actin cytoskeleton reorganization	2.12396e-05	Actn; trio; Rac1; Rok; Vav; Cdc42; parvin; Arp3; Rac2; SCAR; Arpc1; dia; Rab11; Mtl; RhoGEF2; Rho1; Dg; mon2
GO:0072659	9.65847e-06	7.4265	7.52858	18	23	protein localization to plasma membrane	2.12396e-05	GAA1; Crag; shi; Cdc42; Sec5; Sec24CD; Sec23; PIG-U; TM9SF4; Rab11; Sec15; Sar1; Exo84; CG5447; Sec6; arm; aPKC; PIG-S
GO:0014902	1.03008e-05	3.48059	16.6938	32	51	myotube differentiation	2.26171e-05	Act57B; zip; Rac1; Rok; Vav; Arp3; Rac2; ImpL3; Thor; Pgk; dock; siz; Hem; SCAR; Ced-12; Tor; mib2; Pax; foxo; Akt1; Pak3; mbc; WASp; Pglym78; Tpi; Khc; Rho1; Arf51F; Mp20; Pfk; Gapdh1; Crk
GO:0019827	1.05429e-05	2.64444	26.841	46	82	stem cell population maintenance	2.30412e-05	sgg; mys; Treh; shg; Egfr; gbb; Rap2l; R; dsh; hop; RPA3; CSN1b; dally; mxt; CSN3; eIF-4a; chic; PDZ-GEF; alien; pelo; piwi; loqs; Nedd8; foxo; eff; CSN5; Rab11; how; CSN6; AdipoR; Nup98-96; msi; His2Av; ball; Hrb98DE; Med; Ote; Lis-1; AGO1; nclb; CSN7; CSN4; chb; Stat92E; arm; Parg
GO:0030097	1.05429e-05	2.64444	26.841	46	82	hemopoiesis	2.30412e-05	sn; mys; shg; asrij; Zfrp8; E(bx); Gale; Rac1; R; hop; if; Ulp1; Cdc42; Adgf-A; Aats-gly; Rac2; Trn; Elp3; Rrp40; lwr; Arf79F; CG1129; PDZ-GEF; Pvr; Syx5; cact; CG8149; Ras85D; RhoL; CSN5; Nup98-96; spas; Atg6; Tl; pll; Mtl; Noa36; RpS8; krz; lolal; Rho1; Su(var)2-10; chb; Stat92E; mRpL53; CTPsyn
GO:0098727	1.05429e-05	2.64444	26.841	46	82	maintenance of cell number	2.30412e-05	sgg; mys; Treh; shg; Egfr; gbb; Rap2l; R; dsh; hop; RPA3; CSN1b; dally; mxt; CSN3; eIF-4a; chic; PDZ-GEF; alien; pelo; piwi; loqs; Nedd8; foxo; eff; CSN5; Rab11; how; CSN6; AdipoR; Nup98-96; msi; His2Av; ball; Hrb98DE; Med; Ote; Lis-1; AGO1; nclb; CSN7; CSN4; chb; Stat92E; arm; Parg
GO:0031323	1.05768e-05	1.27722	498.851	573	1524	regulation of cellular metabolic process	2.30795e-05	CkIIalpha; elav; SkpA; Rbf; CG14786; MED18; mip130; usp; CG14812; csw; Pgd; pn; CG3071; crn; wds; Zw10; sgg; eIF2B-beta; Rala; tyf; CG2982; Torsin; rb; snf; Cdk7; RhoGAP5A; CG4119; CG4078; MAPk-Ak2; CG5941; Spt6; schlank; CG3198; ct; NELF-B; fs(1)h; slpr; e(r); HP1b; dalao; Dsor1; fh; flw; PPP4R2r; Atg8a; cpa; CG30291; mago; NC2alpha; CG10306; Rae1; MED23; eIF2B-delta; CG13551; vir; Dcp-1; Sesn; …
GO:0010623	1.07231e-05	2.04728	49.4268	75	151	developmental programmed cell death	2.33628e-05	CG5254; ctp; Atg5; Atg8a; sktl; Egfr; Dcp-1; eIF-5A; CG3829; zip; emp; mri; Atg2; Eip63F-1; Ubi-p63E; CG14995; CtsB1; CG7860; shi; Chc; Cyp1; rept; ftz-f1; Eip71CD; AGO2; Atg1; Dronc; eIF-4E; Atg18a; MED24; morgue; AIF; crq; l(2)gl; eRF1; Hr78; Itp-r83A; Atg17; CG9769; santa-maria; Akap200; raw; Utx; mdy; bel; CG8149; Ras85D; Bruce; Ect3; DNaseII; Mdh2; Rab7; Atg6; BRWD3; Apc; Ef1gamma; Obp99b; D…
GO:0045454	1.10792e-05	3.55869	16.0392	31	49	cell redox homeostasis	2.41015e-05	CG3719; CG4199; Trxr-1; CG5554; CG8993; prtp; Jafrac1; CG14407; CG9911; CG6852; CG7430; CG7484; Su(P); CG5027; Pdi; Txl; CG15456; Prx6005; AIF; Trxr-2; CG3887; Trx-2; CG6523; CG9302; CaBP1; Prx3; CG17843; CG11007; CG4670; ERp60; Prx5
GO:0006412	1.12244e-05	1.38787	254.99	310	779	translation	2.43799e-05	RpL22; RpL36; CG14786; sta; mRpL16; eIF2B-epsilon; mRpL14; CG8636; tko; eIF2B-beta; CG10802; tyf; mRpL33; mRpL30; RpL35; CG5941; RpL7A; RpL17; NA; RpS6; CG2263; RpS28b; Aats-lys; mRpL54; RpL29; CG10306; mRpS29; RpS16; bonsai; RpL23; RpS24; eIF2B-delta; mRpL43; l(2)efl; eIF-5A; RpL12; RpL39; Not11; eIF6; mRpS17; RpL19; Aats-tyr-m; mRpL17; mRpL46; RpL23A; HBS1; mRpL23; RpL8; Aats-pro; CG17737; RpL2…
GO:0007297	1.14681e-05	2.10379	45.4988	70	139	ovarian follicle cell migration	2.4871e-05	dor; usp; Rala; spoon; sqh; mys; Dsor1; shg; Egfr; vir; tsr; zip; Rac1; dsh; hop; Evi5; shi; sl; if; par-6; dome; flr; CalpB; nudE; Cbl; Ppat-Dpck; Sec5; Rab5; cpb; CG4552; kis; Sec8; stai; Hrb27C; Pvr; bsk; CG6509; Ced-12; Gli; CG5869; Mhc; Catsup; Ras85D; RhoL; sqd; twf; Ppcs; psidin; Rab11; Sec15; Cortactin; CASK; mbc; jar; cindr; 18w; hpo; ena; Sec6; Rho1; Lis-1; Rme-8; Crk; Stat92E; Hrs; mim…
GO:0035006	1.25974e-05	3.74428	14.7298	29	45	melanization defense response	2.72783e-05	Nrg; Rac1; Flo2; Hayan; Vav; Cdc42; Spn77Ba; Gl; Dronc; Shc; Rac2; LanA; MP1; Spn27A; Spn28Dc; bsk; dia; Sp7; RhoL; poly; Tl; Eb1; Rho1; Cdk5; egr; PPO2; Pten; Exn; aPKC
GO:0032501	1.27748e-05	1.18299	1445.82	1552	4417	multicellular organismal process	2.76202e-05	alpha-Cat; CkIIalpha; NA; cin; elav; CG18273; Appl; Roc1a; SkpA; sdk; Rbf; RpL22; CG13366; AMPKalpha; CG11448; DAAM; CG3638; pck; rush; inc; dor; Ns3; mip130; Actn; usp; Edem1; deltaCOP; csw; pn; CG2918; crn; kz; Vinc; Nmd3; wds; Zw10; tko; sgg; Rala; CG2875; Vap-33A; lva; cib; Femcoat; Fas2; Nsun2; CHOp24; CG3527; Cbp80; Torsin; rb; ctp; Ptp4E; snf; Sas10; Rnp4F; Mcm3; RhoGAP5A; spoon; Act5C; CG…
GO:0006644	1.35487e-05	2.26362	36.9883	59	113	phospholipid metabolic process	2.92486e-05	Ocrl; CG4406; Vap-33A; GAA1; CG3160; sws; CG11190; sktl; Synj; CG3376; fwd; Sac1; Cct1; CG12006; CG42237; CG15743; rdgB; CG14411; Pis; CG8239; eas; sl; CG9784; CG17029; CG17027; Pi3K68D; CG6707; CdsA; Plc21C; CG4825; CG9391; Pi4KIIalpha; PIG-U; fu12; ry; Ipp; CG33331; CG7718; Pi3K92E; CG5991; mino; CG7789; CG2201; CG6805; bbc; Taz; Fpps; CG2292; sPLA2; CG30503; Inos; Pten; PIP4K; CG32699; CG30381…
GO:0034314	1.35882e-05	24.7302	4.25529	12	13	Arp2/3 complex-mediated actin nucleation	2.92892e-05	Arpc3B; flr; Arp3; Arpc5; Arpc4; SCAR; Arpc1; CG5869; Arpc2; WASp; wash; Arpc3A
GO:0009063	1.3845e-05	5.41722	9.49256	21	29	cellular amino acid catabolic process	2.97973e-05	arg; Gad1; v; CG7860; CG7430; CG8745; CG10361; CG6638; Hn; ppl; CG9547; CG6415; hgo; CG8665; GstZ2; GstZ1; CG3999; Ssadh; CG3267; Gdh; Sardh
GO:0072350	1.39154e-05	3.98304	13.4205	27	41	tricarboxylic acid metabolic process	2.99033e-05	spoon; kdn; l(1)G0255; Scsalpha; Rpd3; CG5599; HDAC6; l(1)G0156; CG7430; Nc73EF; Sucb; smt3; barr; Acon; CG1315; skap; CG5214; SdhC; Mdh2; CG6439; CG5028; CG1544; SdhB; vimar; SdhA; ATPCL; Src42A
GO:0042766	1.40159e-05	Inf	3.2733	10	10	nucleosome mobilization	3.00736e-05	Nurf-38; E(bx); Chrac-16; Mi-2; Chd3; NC2beta; Caf1; Acf1; Iswi; Chrac-14
GO:1901137	1.40516e-05	1.76795	76.9225	108	235	carbohydrate derivative biosynthetic process	3.01045e-05	CG3038; CG4406; GlcAT-I; GAA1; CG11190; Ost48; l(1)G0230; ras; Ppcdc; blw; Galphas; Gyk; oxt; CG12006; Hexo1; sesB; FucT6; ade5; nmdyn-D6; Ugt; Adgf-A; ms(3)72Dt; Arl1; Tollo; CG10688; nst; GlcAT-P; ATPsyn-b; CG3434; sgl; Prat2; sfl; Ppat-Dpck; CG1518; Ts; Tgt; fbl; CG4825; Arf79F; CG3792; CG5828; Gmd; ade2; CG9536; mmy; ade3; wol; PIG-U; GlcAT-S; CG33303; RnrL; l(2)06225; CG6453; CG10166; Dpck; …
GO:0007391	1.41624e-05	2.31978	34.697	56	106	dorsal closure	3.0296e-05	Rala; mys; slpr; Egfr; gbb; zip; Sac1; Rac1; R; msn; Src64B; dsh; dlg1; Rok; Vav; Cdc42; pcm; Dab; Nrx-IV; Nmt; Rac2; sinu; ed; Rab5; lwr; l(2)gl; Cg25C; chic; PDZ-GEF; Sec61alpha; mmy; Cka; Btk29A; raw; bsk; Ras85D; yrt; lkb1; flfl; Rab11; mbc; crb; jar; Mtl; Inx3; alph; cora; ena; Rho1; shark; scb; shn; Jra; Ggamma1; arm; Src42A
GO:0007308	1.44491e-05	2.02045	49.7541	75	152	oocyte construction	3.08626e-05	CkIIalpha; Moe; flw; shg; sktl; mago; tud; Egfr; DCP1; alpha-Spec; Hsp83; Rop; CkIIbeta; lic; Chc; Rok; par-6; Lasp; blue; Rac2; ndl; l(2)gl; lost; Scox; chic; Hrb27C; Rbsn-5; Pka-C1; Ge-1; Rab6; BicD; vls; ik2; E2f2; eIF4AIII; Ras85D; poly; lkb1; sqd; ea; asun; CSN5; mira; Rab11; lsn; Syx1A; bai; spz; btz; spn-F; heph; TBCB; wbl; stau; Khc; Lis-1; Dg; bic; Nacalpha; SmD3; psq; TER94; 14-3-3zeta;…
GO:0008088	1.45265e-05	5.04525	10.1472	22	31	axon cargo transport	3.09649e-05	Vap-33A; Marf; fh; Sac1; Dlic; Gl; Atg1; syd; Klp64D; stai; Arp1; Dlc90F; Rab1; htt; Mob4; unc-104; Khc; Lis-1; Dmn; sw; futsch; Lrrk
GO:0072089	1.45408e-05	2.38579	32.4056	53	99	stem cell proliferation	3.09649e-05	crn; ric8a; zip; key; dlg1; Gbeta13F; eas; CG3560; par-6; Cdc42; polo; MED11; brm; MED4; Galphai; l(2)gl; mtd; MED31; Pez; mts; numb; Cdk1; CoIV; Dap160; MAGE; Sgt1; Ras85D; MED6; tws; CG5214; CoVa; lkb1; flfl; mor; mira; jar; pins; Apc; CG7834; hpo; stau; Rho1; Lis-1; clu; cnn; Ggamma1; Rel; osa; yki; bun; MED10; aPKC; mud
GO:0016322	1.47851e-05	4.30157	12.1112	25	37	neuron remodeling	3.14379e-05	Roc1a; SkpA; usp; Dcp-1; ftz-f1; Dronc; kis; chic; SA; Stam; ik2; ird1; Mical; eff; Pi3K92E; SMC1; Atg6; Drice; ced-6; shrb; Cul1; Hrs; Pten; vtd; Imp
GO:0009127	1.49527e-05	4.50435	11.4565	24	35	purine nucleoside monophosphate biosynthetic process	3.16989e-05	l(1)G0230; ras; blw; sesB; ade5; ms(3)72Dt; ATPsyn-b; Prat2; ade2; ade3; l(2)06225; Prat; Adk3; CG3321; Oscp; Dhfr; ATPsyn-d; ATPsyn-Cf6; ATPsyn-gamma; CG1746; ATPsyn-beta; mt:ATPase6; bur; AMPdeam
GO:0009168	1.49527e-05	4.50435	11.4565	24	35	purine ribonucleoside monophosphate biosynthetic process	3.16989e-05	l(1)G0230; ras; blw; sesB; ade5; ms(3)72Dt; ATPsyn-b; Prat2; ade2; ade3; l(2)06225; Prat; Adk3; CG3321; Oscp; Dhfr; ATPsyn-d; ATPsyn-Cf6; ATPsyn-gamma; CG1746; ATPsyn-beta; mt:ATPase6; bur; AMPdeam
GO:0016049	1.65029e-05	2.13844	41.8982	65	128	cell growth	3.49329e-05	AMPKalpha; DAAM; sqh; slpr; Nrg; Sesn; Pdk1; trio; cue; pUf68; Rac1; Strip; dsh; bif; sl; gig; fz2; Gl; Atg1; path; eIF-4E; mRpL12; pix; CdsA; Rac2; vito; Prpk; Thor; Rab5; Hem; jagn; Rheb; Hdac3; Liprin-alpha; poe; raw; bsk; SCAR; Tor; Lar; RagA-B; Ras85D; foxo; Abi; Akt1; Pi3K92E; Rab11; pit; puf; Mtl; dco; nero; mle; CG5189; RhoGEF2; Rho1; shark; scb; shot; stan; JhI-1; Pten; PIP4K; bun; Ank2
GO:0061564	1.79981e-05	1.61266	108.019	144	330	axon development	3.80409e-05	CkIIalpha; AMPKalpha; DAAM; Fas2; Ptp4E; mys; Nrg; Ppt1; Moe; ras; shg; tsr; Chi; betaTub60D; uzip; trio; Sac1; Rac1; alpha-Spec; msn; Strip; Rpd3; Src64B; Con; Dlic; dsh; Gtp-bp; Ptp10D; bif; mew; ben; Rok; if; beta-Spec; RhoGAPp190; Vav; Ulp1; Cdc42; fz2; Dab; Nrt; fax; brm; dlp; Gl; Liprin-beta; caps; Ptp69D; eIF-2beta; aay; dally; Arp3; pbl; Rac2; velo; LanA; Klp64D; Elp3; Rab5; CG7261; dock;…
GO:0010506	1.93369e-05	2.73541	23.5677	41	72	regulation of autophagy	4.08096e-05	Atg8a; Rae1; Dcp-1; Atg2; Syx17; sesB; Atg101; gig; HLH106; CG6878; Atg1; Sod; Dronc; Hsp67Bc; Atg18a; mio; Atg4a; Rheb; PEK; Sec61alpha; Utx; bsk; Tor; Acn; Pax; RagA-B; Ras85D; Bruce; foxo; FK506-bp1; Pi3K92E; Atg16; nero; Atg7; Sod2; Atg9; Sec61beta; Nup44A; Pten; ltd; rl
GO:0019220	1.94408e-05	1.74295	78.2318	109	239	regulation of phosphate metabolic process	4.09067e-05	SkpA; CG14786; Pgd; sgg; Rala; Cdk7; RhoGAP5A; MAPk-Ak2; CG3198; slpr; Dsor1; flw; PPP4R2r; cpa; CG30291; mago; CG13551; Galphas; slik; Sac1; Rac1; Cdc37; Patj; msn; Strip; CG12082; Src64B; sesB; lic; ben; mbt; Rok; par-6; gig; CG14184; Nca; Mkp3; endos; CG10754; vih; fry; Cbl; syd; Fnta; cpb; ebi; CG2789; l(2)gl; Cdk12; CycH; Atg17; ksr; betaggt-I; smt3; Mnn1; Cka; Pvr; raw; Cks30A; bsk; CG17124…
GO:0051174	1.94408e-05	1.74295	78.2318	109	239	regulation of phosphorus metabolic process	4.09067e-05	SkpA; CG14786; Pgd; sgg; Rala; Cdk7; RhoGAP5A; MAPk-Ak2; CG3198; slpr; Dsor1; flw; PPP4R2r; cpa; CG30291; mago; CG13551; Galphas; slik; Sac1; Rac1; Cdc37; Patj; msn; Strip; CG12082; Src64B; sesB; lic; ben; mbt; Rok; par-6; gig; CG14184; Nca; Mkp3; endos; CG10754; vih; fry; Cbl; syd; Fnta; cpb; ebi; CG2789; l(2)gl; Cdk12; CycH; Atg17; ksr; betaggt-I; smt3; Mnn1; Cka; Pvr; raw; Cks30A; bsk; CG17124…
GO:0033157	2.00403e-05	3.37099	16.3665	31	50	regulation of intracellular protein transport	4.2043e-05	sgg; CHOp24; GAA1; Crag; Act57B; Nup214; pav; Stim; fu; Arl1; Trn; noi; CG7214; PIG-U; cact; Cas; Fs(2)Ket; eca; Kap-alpha3; Su(fu); mbo; Akt1; Rab11; Sar1; crb; dco; Diap2; Cam; Cul4; Sec16; PIG-S
GO:0072524	2.00403e-05	3.37099	16.3665	31	50	pyridine-containing compound metabolic process	4.2043e-05	Pgd; l(1)G0334; Hex-A; Tal; CG12016; CG17333; CG9940; Gapdh2; Pfrx; Zw; ImpL3; CG3714; Pgk; Eno; Gpdh; sgll; Mical; Nmnat; Ald; Pglym78; CG11899; Tpi; Dg; Gpo-1; Pfk; Pgi; Gapdh1; CG30499; Gdh; Pdxk; Rpi
GO:0000768	2.17312e-05	3.44304	15.7118	30	48	syncytium formation by plasma membrane fusion	4.53214e-05	zip; Rac1; Rok; Vav; Arp3; Rac2; ImpL3; Thor; Pgk; dock; siz; Hem; SCAR; Ced-12; Tor; mib2; Pax; foxo; Akt1; Pak3; mbc; WASp; Pglym78; Tpi; Rho1; Arf51F; Mp20; Pfk; Gapdh1; Crk
GO:0005996	2.17312e-05	3.44304	15.7118	30	48	monosaccharide metabolic process	4.53214e-05	CG13369; Gale; oxt; Gapdh2; Pfrx; Zw; Pgm; Atg1; CG10688; Galk; CG10467; GlyP; Galt; Rack1; CG9466; LM408; CG5322; Gld; alpha-Man-II; GlyS; alpha-Man-IIb; CG3534; CG10924; Pepck; Pgi; Mal-A3; Mal-A1; Gapdh1; PhKgamma; Fuca
GO:0006949	2.17312e-05	3.44304	15.7118	30	48	syncytium formation	4.53214e-05	zip; Rac1; Rok; Vav; Arp3; Rac2; ImpL3; Thor; Pgk; dock; siz; Hem; SCAR; Ced-12; Tor; mib2; Pax; foxo; Akt1; Pak3; mbc; WASp; Pglym78; Tpi; Rho1; Arf51F; Mp20; Pfk; Gapdh1; Crk
GO:0007520	2.17312e-05	3.44304	15.7118	30	48	myoblast fusion	4.53214e-05	zip; Rac1; Rok; Vav; Arp3; Rac2; ImpL3; Thor; Pgk; dock; siz; Hem; SCAR; Ced-12; Tor; mib2; Pax; foxo; Akt1; Pak3; mbc; WASp; Pglym78; Tpi; Rho1; Arf51F; Mp20; Pfk; Gapdh1; Crk
GO:0010604	2.18736e-05	1.45791	174.467	219	533	positive regulation of macromolecule metabolic process	4.55513e-05	CkIIalpha; usp; Pgd; pn; CG3071; wds; sgg; tyf; rb; CG5941; Spt6; schlank; CG3198; NELF-B; fs(1)h; slpr; HP1b; dalao; Dsor1; mago; NC2alpha; Lpt; eIF-5A; Chi; slik; key; Rabex-5; Rac1; Cdc37; dre4; msn; Jafrac2; Strip; ida; Rcd5; TfIIEbeta; Src64B; Upf1; CkIalpha; lic; Bap60; g; ben; exd; Nup153; mbt; CG9099; e(y)1; fu; gig; CG14184; HLH106; Taf6; ftz-f1; MED19; mbf1; Taf4; brm; Trl; CG10754; Atg…
GO:0002009	2.21204e-05	1.3893	234.041	285	715	morphogenesis of an epithelium	4.59974e-05	CG13366; csw; crn; sgg; Rala; Fas2; ctp; RhoGAP5A; spoon; CG5966; sqh; Inx2; ct; sn; mys; fs(1)h; slpr; Nrg; Moe; Zpr1; flw; shg; Egfr; clt; Fkbp14; px; wmd; gbb; Lpt; Galphas; tsr; Chi; spag; zip; Pdk1; fwd; trio; Sac1; Rabex-5; Myo61F; Rac1; Cct1; Patj; dlt; R; ecd; msn; Eip63E; ImpE2; Src64B; dsh; hop; dlg1; bif; fw; pot; dy; ade5; mew; l(1)G0007; Lsd-2; shi; Stim; Rok; SMC3; if; par-6; CG6398…
GO:0080135	2.32567e-05	2.27779	34.3696	55	105	regulation of cellular response to stress	4.82159e-05	SkpA; sgg; Rala; CG4078; MAPk-Ak2; slpr; flw; cpa; Dcp-1; Sac1; CG12082; ben; Atg101; HLH106; CG6878; Sod; syd; cpb; ebi; chic; Mnn1; Cka; emb; raw; bsk; Tor; ics; p38b; Mkk4; Ras85D; Bruce; Blm; lkb1; foxo; FK506-bp1; Akt1; Pk92B; p38a; XNP; ball; ALiX; alph; heph; hppy; Atg7; Sod2; Atg9; Cam; Egm; CG11107; Crk; Pten; rl; Alg-2; Imp
GO:0006892	2.33237e-05	7.01219	7.20125	17	22	post-Golgi vesicle-mediated transport	4.82159e-05	GAA1; Crag; Gga; p24-1; Tomosyn; g; Sec5; Arf79F; PIG-U; scat; Rab14; Snap24; Rab11; CG5447; Lerp; Sec6; PIG-S
GO:0030838	2.33237e-05	7.01219	7.20125	17	22	positive regulation of actin filament polymerization	4.82159e-05	DAAM; Arpc3B; flr; Arp3; Arpc5; Gel; Arpc4; SCAR; Arpc1; CG5869; Arpc2; dia; sals; gish; WASp; wash; Arpc3A
GO:0036099	2.33237e-05	7.01219	7.20125	17	22	female germ-line stem cell population maintenance	4.82159e-05	shg; gbb; CSN1b; mxt; CSN3; alien; Nedd8; foxo; CSN5; CSN6; AdipoR; ball; Hrb98DE; AGO1; CSN7; CSN4; Parg
GO:0042742	2.47138e-05	1.83425	63.502	91	194	defense response to bacterium	5.10151e-05	ssx; CG32795; Rala; Vap-33A; tyf; CG3527; CBP; Crag; Tim10; CG13551; Nxt1; key; CG13890; Myo61F; HBS1; Jafrac2; Fit1; PGRP-SA; CG2247; CG14411; betaCOP; dome; CG7408; NUCB1; PDCD-5; Hsp27; GstO2; Rac2; Thor; Npc2a; GlyP; Hr78; CG2051; Pcmt; mtd; CG13994; Tep3; LanB1; Tep2; Wwox; CSN8; Etl1; SamDC; CYLD; bsk; TM9SF4; p38b; NimB2; Rab14; Tep4; CG9318; unc-45; MED6; CG14722; GILT1; Pebp1; GILT2; SPE…
GO:0010591	2.49403e-05	13.3972	4.90995	13	15	regulation of lamellipodium assembly	5.11836e-05	cpa; tsr; HSPC300; Rac1; par-6; Cdc42; Arp3; cpb; SCAR; twf; psidin; ena; aPKC
GO:0051491	2.49403e-05	13.3972	4.90995	13	15	positive regulation of filopodium assembly	5.11836e-05	DAAM; HSPC300; Rac1; par-6; Cdc42; Arp3; kra; chic; SCAR; Arpc1; ena; shot; aPKC
GO:1902743	2.49403e-05	13.3972	4.90995	13	15	regulation of lamellipodium organization	5.11836e-05	cpa; tsr; HSPC300; Rac1; par-6; Cdc42; Arp3; cpb; SCAR; twf; psidin; ena; aPKC
GO:1903036	2.49403e-05	13.3972	4.90995	13	15	positive regulation of response to wounding	5.11836e-05	Egfr; Rac1; Rok; Cdc42; Rac2; chic; holn1; dia; Akt1; Mtl; Rho1; rl; Imp
GO:0010243	2.66197e-05	2.28172	33.715	54	103	response to organonitrogen compound	5.45511e-05	SkpA; CG14812; Atg5; Cyp6d2; Galphas; Pdk1; RpL8; Atg2; CG14977; ImpL2; PGRP-SA; pdgy; sl; CG9099; Tao; gig; CG14184; Atg3; CG8745; Atg1; Hsp67Bc; Atg18a; dock; Atg17; Pvr; CG5110; MAGE; poly; foxo; GlyS; Akt1; Ns1; Pi3K92E; Hsp68; Atg6; Lnk; Atg16; dj-1beta; dco; Cyp6a2; hppy; CG5189; Hsf; Atg9; Cyp6a8; Mdr50; Pka-R2; RagC-D; Cul1; Pten; tefu; Duox; moody; Pi3K21B
GO:0009112	2.67651e-05	6.18801	7.85591	18	24	nucleobase metabolic process	5.47697e-05	CG17896; su(r); Adgf-A; Adk1; Prat2; DhpD; ade3; b; Prat; pyd3; Dhod; ry; Adgf-D; r-l; Dak1; Aprt; CRMP; r
GO:0032259	2.81371e-05	2.42266	29.1323	48	89	methylation	5.7494e-05	CG4045; wds; Nsun2; CG3527; wuho; Ipod; Lpt; CG32281; Set2; CG8939; ptip; Rbbp5; CG9154; CG9531; CG9596; Mnn1; LKR; CG7818; Su(var)205; Wdr82; Utx; Dpy-30L1; Art8; CG3793; Art4; mtTFB2; Art1; Sbf; Caf1; Art3; CG5220; CG11447; Ime4; ash2; vig2; CG14544; BEAF-32; Hen1; Ntmt; Hcf; aft; csul; Mt2; Set1; Art7; CG15618; yki; CoRest
GO:0006101	2.83945e-05	3.83458	13.0932	26	40	citrate metabolic process	5.79362e-05	spoon; kdn; l(1)G0255; Scsalpha; Rpd3; CG5599; HDAC6; l(1)G0156; CG7430; Nc73EF; Sucb; smt3; barr; Acon; skap; CG5214; SdhC; Mdh2; CG6439; CG5028; CG1544; SdhB; vimar; SdhA; ATPCL; Src42A
GO:0048858	2.89916e-05	1.40824	207.527	255	634	cell projection morphogenesis	5.90693e-05	CkIIalpha; Appl; AMPKalpha; CG11448; DAAM; rush; usp; Vinc; lva; Fas2; Ptp4E; ct; sn; mys; Nrg; Ppt1; Moe; ras; shg; HmgD; GM130; babos; tsr; Chi; betaTub60D; uzip; E(bx); trio; Sac1; Rac1; alpha-Spec; alphaCOP; MEP-1; msn; Strip; CG12082; prominin-like; Rpd3; Src64B; Dlic; dsh; Ran; Gtp-bp; Ptp10D; bif; mew; Bap60; CG2691; ben; Rok; if; beta-Spec; RhoGAPp190; Vav; Ulp1; Cdc42; alphaSnap; Mi-2; t…
GO:0042127	2.91098e-05	1.85911	59.574	86	182	regulation of cell proliferation	5.92247e-05	Rbf; Moe; Egfr; Vps20; l(2)06496; Nurf-38; key; dlt; Hsp83; hop; dlg1; CG3560; CG9099; dome; gig; polo; fz2; Mkp3; MED11; Cat; Vps60; brm; Dronc; Cbl; MED4; msl-3; vito; RpS21; Rab5; lwr; l(2)gl; Snr1; Madm; mtd; MED31; Lam; Pez; mts; Dref; Utx; CG13284; CoIV; Dap160; MAGE; hyd; Ras85D; MED6; tws; CG5214; CoVa; mfas; Tango9; foxo; smp-30; Caf1; Akt1; mor; CG17565; CSN5; sds22; Pi3K92E; crb; Cul5;…
GO:0050767	2.96725e-05	1.89029	56.3007	82	172	regulation of neurogenesis	6.02829e-05	sdk; DAAM; csw; lva; Ppt1; GM130; babos; trio; Rac1; Rpd3; Dlic; dsh; bif; CG3560; mbt; Rok; RhoGAPp190; Cdc42; polo; trc; MED11; brm; fry; pbl; Rac2; MED4; Rcc1; Elp3; ed; l(2)gl; Sec23; MED31; chic; PDZ-GEF; Liprin-alpha; mts; numb; Lar; CoIV; Mcm10; Dap160; MAGE; Ras85D; MED6; tws; CG5214; CoVa; eff; Akt1; mor; Pi3K92E; Rab1; Sar1; unk; spas; CHORD; BRWD3; nct; alph; CG7834; Adf1; hpo; pAbp; R…
GO:0051222	2.97913e-05	3.97021	12.4385	25	38	positive regulation of protein transport	6.04375e-05	CHOp24; Crag; Act57B; pav; p24-1; opm; Stim; fu; noi; CG7214; Cas; Fs(2)Ket; eca; Kap-alpha3; Snx3; RhoGAP92B; Rab11; Rab1; Sar1; AdipoR; unc-104; Diap2; Cam; Cul4; Sec16
GO:1902532	3.02426e-05	2.64961	23.8951	41	73	negative regulation of intracellular signal transduction	6.12651e-05	SkpA; AMPKalpha; pn; sgg; Rala; flw; cpa; E(bx); Sac1; msn; Atg2; CG12082; vap; gig; MESR6; Mkp3; Vps60; Atg1; Atg18a; ed; cpb; ebi; pzg; Pez; Mnn1; Akap200; raw; bsk; ics; MESR3; Lk6; ATPsyn-d; alph; Su(var)2-10; Cul1; CG1399; kappaB-Ras; PlexB; chb; Pten; Ide
GO:0030718	3.0912e-05	2.8328	20.9491	37	64	germ-line stem cell population maintenance	6.24457e-05	mys; shg; Egfr; gbb; Rap2l; R; CSN1b; dally; mxt; CSN3; eIF-4a; chic; PDZ-GEF; alien; pelo; piwi; loqs; Nedd8; foxo; eff; CSN5; Rab11; how; CSN6; AdipoR; Nup98-96; His2Av; ball; Hrb98DE; Med; Ote; AGO1; nclb; CSN7; CSN4; Stat92E; Parg
GO:0009064	3.10021e-05	5.15799	9.16523	20	28	glutamine family amino acid metabolic process	6.24457e-05	arg; Gad1; CG7860; CG9674; l(3)72Dr; CG8745; Got2; Gs1; P5CDh1; CG7470; dmGlut; CG1315; ry; P5cr-2; P5cr; Got1; SelD; Gdh; r; CG9510
GO:0031589	3.10021e-05	5.15799	9.16523	20	28	cell-substrate adhesion	6.24457e-05	Vinc; mys; Rac1; Fit1; dyl; mew; if; LanB2; LanA; Ilk; Tig; LanB1; mesh; scb; muskelin; Ndg; pgant3; Pten; tyn; Ten-a
GO:1901606	3.10021e-05	5.15799	9.16523	20	28	alpha-amino acid catabolic process	6.24457e-05	arg; Gad1; v; CG7860; CG7430; CG8745; CG10361; CG6638; Hn; ppl; CG9547; CG6415; hgo; CG8665; GstZ2; GstZ1; CG3999; CG3267; Gdh; Sardh
GO:0080090	3.15415e-05	1.26296	484.121	553	1479	regulation of primary metabolic process	6.34419e-05	CkIIalpha; elav; SkpA; Rbf; CG14786; MED18; mip130; usp; CG14812; csw; Pgd; pn; CG3071; crn; wds; Zw10; sgg; eIF2B-beta; Rala; tyf; CG2982; Torsin; rb; snf; Cdk7; RhoGAP5A; CG4119; CG4078; MAPk-Ak2; CG5941; Spt6; schlank; CG3198; ct; NELF-B; fs(1)h; slpr; e(r); HP1b; dalao; Dsor1; fh; flw; PPP4R2r; Atg8a; cpa; CG30291; mago; NC2alpha; CG10306; MED23; eIF2B-delta; CG13551; vir; l(2)efl; pita; gbb;…
GO:0010638	3.16104e-05	2.35186	30.769	50	94	positive regulation of organelle organization	6.34901e-05	DAAM; Pgam5; pn; sgg; Marf; Lpt; ida; Bap60; Rok; Arpc3B; Trl; flr; vih; bol; Arp3; Sec5; Arpc5; Drp1; ebi; mTerf3; Gel; Arpc4; Su(var)205; Cks30A; SCAR; Arpc1; CG5869; Arpc2; Cdc23; dia; Ibf1; Ibf2; Tctp; sals; Abi; Cp190; gish; Cdc16; spas; WASp; mle; BubR1; Fis1; stau; Opa1; wash; mlt; Arpc3A; msps; Sirt6
GO:0006650	3.17068e-05	2.52821	26.1864	44	80	glycerophospholipid metabolic process	6.3492e-05	Ocrl; CG4406; Vap-33A; GAA1; CG3160; sws; CG11190; sktl; Synj; fwd; Sac1; Cct1; CG12006; CG15743; rdgB; CG14411; eas; CG9784; CG17029; CG17027; Pi3K68D; CG6707; CdsA; Plc21C; CG4825; CG9391; Pi4KIIalpha; PIG-U; ry; Ipp; CG33331; Pi3K92E; CG7789; CG2201; CG6805; Taz; CG2292; Pten; PIP4K; CG30381; 5PtaseI; PI4KIIIalpha; Pi3K21B; PIG-S
GO:0008285	3.17068e-05	2.52821	26.1864	44	80	negative regulation of cell proliferation	6.3492e-05	Rbf; Vps20; key; Hsp83; dlg1; CG3560; gig; polo; MED11; Vps60; brm; Dronc; MED4; Rab5; lwr; l(2)gl; Snr1; MED31; Lam; Pez; mts; Utx; CG13284; CoIV; MAGE; MED6; tws; CG5214; CoVa; mfas; foxo; mor; CSN5; sds22; Cul5; CG7834; hpo; shn; Vps25; Rel; osa; Pten; Csk; MED10
GO:0090305	3.1746e-05	4.3156	11.1292	23	34	nucleic acid phosphodiester bond hydrolysis	6.3492e-05	sta; mei-9; Top3beta; CG2972; CG2145; IntS9; CG3689; CG7185; RpS21; Clp; Sym; Rat1; WRNexo; CstF-64; Cpsf73; Cpsf100; IntS11; CstF-50; Dcr-2; AGO1; JhI-1; Cpsf160; su(f)
GO:0031334	3.18942e-05	4.81473	9.81989	21	30	positive regulation of protein complex assembly	6.36984e-05	DAAM; Arpc3B; flr; Arp3; Arpc5; Gel; Arpc4; SCAR; Arpc1; CG5869; Arpc2; dia; TfIIFbeta; sals; gish; spz; Apc; WASp; wash; Arpc3A; msps
GO:0034332	3.21028e-05	4.54018	10.4746	22	32	adherens junction organization	6.39343e-05	alpha-Cat; RhoGAP5A; shg; Rac1; Patj; R; kst; Src64B; shi; par-6; Rac2; PDZ-GEF; Rab11; crb; Pten; arm; p120ctn; rl; Csk; aPKC; Src42A; awd
GO:0051495	3.21028e-05	4.54018	10.4746	22	32	positive regulation of cytoskeleton organization	6.39343e-05	DAAM; Rok; Arpc3B; flr; Arp3; Arpc5; Gel; Arpc4; SCAR; Arpc1; CG5869; Arpc2; dia; sals; Abi; gish; spas; WASp; wash; mlt; Arpc3A; msps
GO:0031325	3.3773e-05	1.43351	182.65	227	558	positive regulation of cellular metabolic process	6.71659e-05	CkIIalpha; usp; Pgd; pn; CG3071; wds; sgg; tyf; CG5941; Spt6; schlank; CG3198; NELF-B; fs(1)h; slpr; HP1b; dalao; Dsor1; fh; mago; NC2alpha; Dcp-1; Lpt; Galphas; eIF-5A; Chi; slik; key; Rabex-5; Rac1; Cdc37; dre4; msn; Jafrac2; Strip; ida; Rcd5; TfIIEbeta; Src64B; sesB; PGRP-SA; Upf1; CkIalpha; lic; Bap60; ben; exd; Nup153; mbt; CG9099; e(y)1; fu; Atg101; gig; CG14184; HLH106; Taf6; ftz-f1; MED19…
GO:0006997	3.42049e-05	2.66803	23.2404	40	71	nucleus organization	6.79293e-05	ctp; Nup214; Nap1; Nup93-1; Nup153; CG6540; Nup205; polo; msk; vito; Dd; Lam; pelo; Ance; fws; hyd; sle; Nup93-2; sra; kuk; Ndc1; jar; Nlp; CG7911; Gp210; pAbp; Ote; P32; LamC; Iswi; p47; Nup154; coil; Parp; msps; CG8771; Msp300; Skeletor; Parg; WDR79
GO:0000819	3.48738e-05	2.29012	32.4056	52	99	sister chromatid segregation	6.91607e-05	Zw10; sgg; Moe; CycB; slik; ida; RfC4; Klp10A; SMC3; RecQ5; vih; nudE; eIF-4E; Klp67A; Rcc1; mad2; mst; gammaTub23C; Rpn10; Chro; SA; Cks30A; aurB; glu; Top2; barr; Cdc23; alphaTub84B; Gie; bel; alphaTub85E; tws; Pp1-87B; Cdc16; spas; SMC1; Cap-D2; Bub3; BubR1; prod; SMC2; Su(var)2-HP2; Mtor; san; Mad1; Incenp; chb; larp; cana; Nipped-B; vtd; cmet
GO:0000070	3.6128e-05	2.35812	30.1143	49	92	mitotic sister chromatid segregation	7.15477e-05	Zw10; sgg; Moe; CycB; slik; ida; RfC4; Klp10A; SMC3; RecQ5; vih; nudE; eIF-4E; Rcc1; mad2; mst; gammaTub23C; Rpn10; Chro; SA; Cks30A; aurB; glu; Top2; barr; Cdc23; alphaTub84B; bel; alphaTub85E; tws; Pp1-87B; Cdc16; spas; SMC1; Cap-D2; Bub3; BubR1; prod; SMC2; Su(var)2-HP2; Mtor; san; Mad1; chb; larp; cana; Nipped-B; vtd; cmet
GO:0006379	3.65753e-05	9.61975	5.56461	14	17	mRNA cleavage	7.21303e-05	IntS9; CG3689; CG7185; Clp; Sym; CstF-64; Cpsf73; Cpsf100; IntS11; CstF-50; Dcr-2; AGO1; Cpsf160; su(f)
GO:0032436	3.65753e-05	9.61975	5.56461	14	17	positive regulation of proteasomal ubiquitin-dependent protein catabolic process	7.21303e-05	wds; sgg; ida; CkIalpha; vih; Ufd1-like; Cks30A; Cdc23; Pomp; CSN5; Cdc16; dco; PI31; TER94
GO:0070142	3.65753e-05	9.61975	5.56461	14	17	synaptic vesicle budding	7.21303e-05	rb; cm; AP-1gamma; or; shi; Chc; AP-1-2beta; Clc; Drp1; AP-1mu; AP-2sigma; AP-2mu; AP-1sigma; AP-2alpha
GO:0035220	3.76671e-05	1.45545	164.974	207	504	wing disc development	7.41801e-05	CG13366; sgg; CHOp24; ctp; CG5966; sqh; ct; sn; mys; fs(1)h; flw; cpa; Egfr; clt; Fkbp14; px; wmd; gbb; Lpt; Galphas; eIF-5A; gammaSnap1; tsr; Chi; Nop60B; zip; Pdk1; Rabex-5; Rac1; Cct1; msn; dsh; hop; bif; fw; pot; dy; Amun; ade5; mew; Set2; l(1)G0007; Lsd-2; Stim; Rok; SMC3; Pp2B-14D; if; CG6398; CG6540; Pfrx; Cdc42; pcm; parvin; alphaSnap; Grasp65; trc; fz2; Mkp3; Arl1; brm; dlp; Trl; Mpcp; c…
GO:0006637	3.85012e-05	22.6638	3.92796	11	12	acyl-CoA metabolic process	7.54985e-05	v; pdgy; CG8239; scu; CG5261; CG8199; CG6178; CG11876; CG7920; CG17691; ATPCL
GO:0035383	3.85012e-05	22.6638	3.92796	11	12	thioester metabolic process	7.54985e-05	v; pdgy; CG8239; scu; CG5261; CG8199; CG6178; CG11876; CG7920; CG17691; ATPCL
GO:0016441	3.85501e-05	3.26144	16.0392	30	49	posttranscriptional gene silencing	7.54985e-05	Cbp80; DCP1; Tudor-SN; Hsc70-3; pcm; AGO2; CG7172; Rm62; r2d2; me31B; piwi; Ge-1; loqs; vig; Nbr; CG1091; bel; Elp1; Hsc70-4; Atx2; Cbp20; Ars2; HPS4; Dcr-2; Bap55; Dg; AGO1; Hen1; trsn; gw
GO:0035194	3.85501e-05	3.26144	16.0392	30	49	posttranscriptional gene silencing by RNA	7.54985e-05	Cbp80; DCP1; Tudor-SN; Hsc70-3; pcm; AGO2; CG7172; Rm62; r2d2; me31B; piwi; Ge-1; loqs; vig; Nbr; CG1091; bel; Elp1; Hsc70-4; Atx2; Cbp20; Ars2; HPS4; Dcr-2; Bap55; Dg; AGO1; Hen1; trsn; gw
GO:0007309	3.87484e-05	1.96391	48.4448	72	148	oocyte axis specification	7.57667e-05	CkIIalpha; Moe; flw; shg; sktl; mago; tud; Egfr; DCP1; Hsp83; Rop; CkIIbeta; lic; Chc; Rok; par-6; Lasp; blue; Rac2; ndl; l(2)gl; lost; chic; Hrb27C; Rbsn-5; Pka-C1; Ge-1; Rab6; BicD; vls; ik2; E2f2; eIF4AIII; Ras85D; poly; lkb1; sqd; ea; asun; CSN5; mira; Rab11; lsn; Syx1A; bai; spz; btz; spn-F; heph; TBCB; wbl; stau; Khc; Lis-1; Dg; bic; Nacalpha; SmD3; psq; TER94; 14-3-3zeta; sel; tsu; didum; …
GO:0006582	3.87943e-05	2.89331	19.6398	35	60	melanin metabolic process	7.57667e-05	Nrg; yellow-d; Rac1; Flo2; Hayan; Vav; Cdc42; Spn77Ba; Gl; Dronc; Shc; Rac2; LanA; MP1; Spn27A; Spn28Dc; bsk; yellow-c; yellow-b; dia; Sp7; RhoL; yellow-f2; yellow-e; poly; Tl; Eb1; Rho1; Cdk5; egr; PPO2; yellow-h; Pten; Exn; aPKC
GO:0048729	3.98342e-05	1.36993	239.278	289	731	tissue morphogenesis	7.76905e-05	CG13366; csw; crn; sgg; Rala; Fas2; ctp; RhoGAP5A; spoon; CG5966; sqh; Inx2; ct; sn; mys; fs(1)h; slpr; Nrg; Moe; Zpr1; flw; shg; Egfr; clt; Fkbp14; px; wmd; gbb; Lpt; Galphas; tsr; Chi; spag; zip; Pdk1; fwd; trio; Sac1; Rabex-5; Myo61F; Rac1; Cct1; Patj; dlt; R; ecd; msn; Eip63E; ImpE2; Src64B; dsh; hop; dlg1; bif; fw; pot; dy; ade5; mew; l(1)G0007; Lsd-2; shi; Stim; Rok; SMC3; if; par-6; CG6398…
GO:0006575	4.17298e-05	2.4496	27.1684	45	83	cellular modified amino acid metabolic process	8.12754e-05	Gclc; GstE12; v; CG2543; Ggt-1; CG4306; GstO3; GstO1; GstO2; CG8005; GstT3; CG4825; CG9547; CG8665; CG1315; Nmdmc; GstZ2; GstZ1; pug; GstD4; GstD5; GstD1; GstD9; GstD10; Dhfr; Gclm; PH4alphaEFB; CG9698; GstE1; GstE3; GstE6; GstE7; GstE9; GstE11; Eip55E; GstE10; GstS1; SelD; GstT1; GstT2; GstE13; Sam-S; Sardh; NA
GO:0034334	4.28828e-05	Inf	2.94597	9	9	adherens junction maintenance	8.31774e-05	RhoGAP5A; Rac1; Patj; shi; Rac2; Rab11; p120ctn; rl; Csk
GO:0042274	4.28828e-05	Inf	2.94597	9	9	ribosomal small subunit biogenesis	8.31774e-05	sta; CG3071; RpS6; CG2972; RpS17; RpS21; l(3)07882; RpS8; RpS7
GO:0048140	4.28828e-05	Inf	2.94597	9	9	male germ-line cyst encapsulation	8.31774e-05	Egfr; CSN1b; CSN3; alien; CSN5; CSN6; Cul2; CSN7; CSN4
GO:0019362	4.58606e-05	3.40126	14.7298	28	45	pyridine nucleotide metabolic process	8.87099e-05	Pgd; l(1)G0334; Hex-A; Tal; CG12016; CG17333; CG9940; Gapdh2; Pfrx; Zw; ImpL3; CG3714; Pgk; Eno; Gpdh; Mical; Nmnat; Ald; Pglym78; Tpi; Dg; Gpo-1; Pfk; Pgi; Gapdh1; CG30499; Gdh; Rpi
GO:0046496	4.58606e-05	3.40126	14.7298	28	45	nicotinamide nucleotide metabolic process	8.87099e-05	Pgd; l(1)G0334; Hex-A; Tal; CG12016; CG17333; CG9940; Gapdh2; Pfrx; Zw; ImpL3; CG3714; Pgk; Eno; Gpdh; Mical; Nmnat; Ald; Pglym78; Tpi; Dg; Gpo-1; Pfk; Pgi; Gapdh1; CG30499; Gdh; Rpi
GO:0045010	4.707e-05	7.73114	6.21927	15	19	actin nucleation	9.09247e-05	Arpc3B; flr; Arp3; Arpc5; Gel; Arpc4; SCAR; Arpc1; CG5869; Arpc2; dia; gish; WASp; wash; Arpc3A
GO:1903827	4.83742e-05	2.96444	18.3305	33	56	regulation of cellular protein localization	9.33167e-05	sgg; CHOp24; GAA1; Crag; Act57B; Nup214; pav; Stim; fu; Mi-2; Arl1; Trn; noi; CG7214; PIG-U; cact; Cas; Fs(2)Ket; eca; Kap-alpha3; Su(fu); mbo; Akt1; Rab11; Sar1; crb; dco; Diap2; Cam; Cul4; ACC; Sec16; PIG-S
GO:0019318	4.96695e-05	3.48433	14.0752	27	43	hexose metabolic process	9.52953e-05	Gale; Gapdh2; Pfrx; Zw; Pgm; Atg1; CG10688; Galk; CG10467; GlyP; Galt; Rack1; CG9466; LM408; CG5322; Gld; alpha-Man-II; GlyS; alpha-Man-IIb; CG10924; Pepck; Pgi; Mal-A3; Mal-A1; Gapdh1; PhKgamma; Fuca
GO:0030010	4.96695e-05	3.48433	14.0752	27	43	establishment of cell polarity	9.52953e-05	sgg; ctp; Moe; slik; zip; Rac1; dsh; Ran; Klp10A; dlg1; par-6; Cdc42; Gl; Galphai; l(2)gl; abs; mts; yrt; Dys; crb; pins; htt; TBCB; Dg; aPKC; PI4KIIIalpha; mud
GO:0061136	4.96695e-05	3.48433	14.0752	27	43	regulation of proteasomal protein catabolic process	9.52953e-05	wds; Zw10; sgg; ida; CkIalpha; REG; vih; Ufd1-like; mad2; Chro; Cks30A; Cdc23; Pomp; alphaTub84B; alphaTub85E; CSN5; Cdc16; crb; Bub3; dco; BubR1; Mtor; PI31; TER94; Mad1; CSN4; CG31687
GO:0097285	4.96695e-05	3.48433	14.0752	27	43	cell-type specific apoptotic process	9.52953e-05	sws; Dcp-1; spag; fwe; Atg1; Dronc; pix; RpL14; msk; morgue; ebi; mdy; Mcm10; MAGE; Bruce; DNaseII; Naam; psidin; RpS3; Drice; hpo; Dp; TER94; cathD; TBPH; tefu; futsch
GO:0032434	5.34916e-05	3.57851	13.4205	26	41	regulation of proteasomal ubiquitin-dependent protein catabolic process	0.000102489	wds; Zw10; sgg; ida; CkIalpha; vih; Ufd1-like; mad2; Chro; Cks30A; Cdc23; Pomp; alphaTub84B; alphaTub85E; CSN5; Cdc16; crb; Bub3; dco; BubR1; Mtor; PI31; TER94; Mad1; CSN4; CG31687
GO:0007405	5.39099e-05	2.37886	28.1504	46	86	neuroblast proliferation	0.000103151	crn; ric8a; zip; dlg1; Gbeta13F; eas; CG3560; par-6; Cdc42; polo; MED11; brm; MED4; Galphai; l(2)gl; MED31; mts; numb; Cdk1; CoIV; Dap160; MAGE; Sgt1; MED6; tws; CG5214; CoVa; lkb1; flfl; mor; mira; jar; pins; Apc; CG7834; stau; Rho1; Lis-1; clu; cnn; Ggamma1; osa; bun; MED10; aPKC; mud
GO:0046148	5.4213e-05	2.47014	25.859	43	79	pigment biosynthetic process	0.000103591	dor; rb; cm; yellow-d; Alas; or; CG3803; Hexo1; v; g; car; Adgf-A; st; Hn; Prat2; mal; Dbp21E2; DhpD; cl; Coprox; ade3; santa-maria; CG8552; CG6750; yellow-c; yellow-b; Prat; alpha-Man-II; yellow-f2; yellow-e; Adgf-D; alpha-Man-IIb; pinta; Ppox; Cnx99A; FeCH; fdl; Updo; yellow-h; pr; Aprt; ltd; lt
GO:0006099	5.72312e-05	3.68618	12.7659	25	39	tricarboxylic acid cycle	0.000108916	spoon; kdn; l(1)G0255; Scsalpha; Rpd3; CG5599; HDAC6; l(1)G0156; CG7430; Nc73EF; Sucb; smt3; barr; Acon; skap; CG5214; SdhC; Mdh2; CG6439; CG5028; CG1544; SdhB; vimar; SdhA; Src42A
GO:0042551	5.72312e-05	3.68618	12.7659	25	39	neuron maturation	0.000108916	Roc1a; SkpA; usp; Dcp-1; ftz-f1; Dronc; kis; chic; SA; Stam; ik2; ird1; Mical; eff; Pi3K92E; SMC1; Atg6; Drice; ced-6; shrb; Cul1; Hrs; Pten; vtd; Imp
GO:0055059	5.72312e-05	3.68618	12.7659	25	39	asymmetric neuroblast division	0.000108916	ric8a; zip; dlg1; Gbeta13F; eas; par-6; Cdc42; Galphai; l(2)gl; mts; numb; Cdk1; Sgt1; tws; lkb1; flfl; mira; jar; pins; stau; clu; cnn; Ggamma1; aPKC; mud
GO:0008610	5.85728e-05	1.8961	51.3908	75	157	lipid biosynthetic process	0.00011132	usp; CG4406; GAA1; Marf; schlank; CG10932; CG11190; fh; fwd; mtacp1; Cct1; ecd; CG12006; Cyp4g15; CG15743; Pis; CG8239; eas; CG6891; HLH106; beg; CG7724; Baldspot; Pex3; GlcAT-P; Fdxh; CdsA; qm; Dd; Npc2a; Plc21C; CG4825; CG10585; CG12170; CG31523; CG9804; ifc; PIG-U; fu12; GlcAT-S; Npc1a; CG6746; mdy; foxo; Npc2b; CG33331; CG7718; CG5919; CG5991; Dhap-at; woc; mino; sro; qless; CG2201; CG5065; H…
GO:0008103	6.20418e-05	5.84279	7.52858	17	23	oocyte microtubule cytoskeleton polarization	0.000117439	sktl; mago; Chc; blue; Rac2; Rbsn-5; Pka-C1; Rab6; BicD; poly; Rab11; btz; spn-F; heph; Khc; TER94; 14-3-3zeta
GO:0033627	6.20418e-05	5.84279	7.52858	17	23	cell adhesion mediated by integrin	0.000117439	mys; mew; if; LanB2; LanA; Hem; Arpc4; Tig; LanB1; SCAR; Arpc1; Abi; Sra-1; scb; pgant3; plx; rhea
GO:0043954	6.20418e-05	5.84279	7.52858	17	23	cellular component maintenance	0.000117439	RhoGAP5A; Synj; Rac1; Patj; alpha-Spec; shi; beta-Spec; Rac2; CG3921; Lam; Rab11; crb; jar; Nmnat; p120ctn; rl; Csk
GO:0040011	6.52683e-05	1.39011	203.272	248	621	locomotion	0.00012308	CkIIalpha; AMPKalpha; DAAM; dor; usp; csw; crn; Rala; Fas2; Torsin; Ptp4E; spoon; sqh; ct; sn; mys; Nrg; Ppt1; Moe; Dsor1; Hex-A; ras; CG10543; shg; Egfr; vir; tsr; Chi; betaTub60D; uzip; zip; pain; trio; Sac1; Rac1; alpha-Spec; R; msn; Rpd3; Src64B; Con; sesB; dsh; hop; dlg1; Ptp10D; bif; Evi5; mew; Jafrac1; Clic; shi; sl; nonA; if; beta-Spec; par-6; Vav; Cdc42; dome; Nup205; nes; fz2; Dab; Nrt;…
GO:0002520	6.52827e-05	2.24906	31.4237	50	96	immune system development	0.00012308	sn; mys; shg; asrij; Zfrp8; E(bx); Gale; Rac1; R; ecd; hop; if; Ulp1; Cdc42; Adgf-A; Aats-gly; Rac2; Trn; Elp3; RpS21; Rrp40; lwr; Arf79F; CG1129; PDZ-GEF; Pvr; Syx5; cact; CG8149; Ras85D; RhoL; CSN5; Nup98-96; spas; Atg6; Tl; pll; Mtl; Noa36; RpS8; krz; prod; lolal; Rho1; SmD3; Su(var)2-10; chb; Stat92E; mRpL53; CTPsyn
GO:0048534	6.52827e-05	2.24906	31.4237	50	96	hematopoietic or lymphoid organ development	0.00012308	sn; mys; shg; asrij; Zfrp8; E(bx); Gale; Rac1; R; ecd; hop; if; Ulp1; Cdc42; Adgf-A; Aats-gly; Rac2; Trn; Elp3; RpS21; Rrp40; lwr; Arf79F; CG1129; PDZ-GEF; Pvr; Syx5; cact; CG8149; Ras85D; RhoL; CSN5; Nup98-96; spas; Atg6; Tl; pll; Mtl; Noa36; RpS8; krz; prod; lolal; Rho1; SmD3; Su(var)2-10; chb; Stat92E; mRpL53; CTPsyn
GO:0032273	6.6266e-05	5.30337	8.18324	18	25	positive regulation of protein polymerization	0.000124693	DAAM; Arpc3B; flr; Arp3; Arpc5; Gel; Arpc4; SCAR; Arpc1; CG5869; Arpc2; dia; sals; gish; WASp; wash; Arpc3A; msps
GO:0030865	6.63149e-05	3.098	16.3665	30	50	cortical cytoskeleton organization	0.000124693	Ocrl; Moe; sktl; tsr; slik; Rac1; pav; shi; Cdc42; polo; Pi3K68D; pbl; Galphai; Elp3; Hem; Arpc4; mtm; chic; SCAR; Arpc2; dia; Sbf; Abi; Sra-1; Rab11; Rho1; Galphao; pnut; Rab21; moody
GO:0016183	6.65063e-05	12.3636	4.58262	12	14	synaptic vesicle coating	0.000124887	rb; cm; AP-1gamma; or; Chc; AP-1-2beta; Clc; AP-1mu; AP-2sigma; AP-2mu; AP-1sigma; AP-2alpha
GO:0007219	6.7219e-05	1.93408	47.4628	70	145	Notch signaling pathway	0.000126058	dor; Rbcn-3B; sgg; Rala; VhaAC39-1; ct; e(r); Sara; Fkbp14; Vps20; Nurf-38; Eps-15; E(bx); CG32479; dsh; shi; Chc; e(y)1; car; Taf6; asf1; Vps36; Taf2; Arp3; lqf; Su(dx); ebi; l(2)gl; pzg; RpL13A; CG9769; aux; eIF-3p40; Gmd; numb; Utx; l(2)gd1; Vha68-1; Arpc1; EndoGI; Dap160; Vps16A; AP-1mu; Vps39; lsn; Usp12-46; rumi; Rab7; Ime4; crb; nct; Vps2; krz; heph; Ehbp1; O-fut1; stan; Taf5; shrb; Vps25;…
GO:0007034	6.83665e-05	4.33274	10.1472	21	31	vacuolar transport	0.000127702	rush; dor; Vps20; g; car; Chmp1; Vps60; CG5498; Vps24; scat; Acn; Vps16A; Rab7; Vps2; Lerp; shrb; Vps13; Vamp7; Hrs; lt; mv
GO:0045732	6.83665e-05	4.33274	10.1472	21	31	positive regulation of protein catabolic process	0.000127702	wds; sgg; ida; CkIalpha; vih; Ufd1-like; Cks30A; l(2)gd1; Cdc23; Pomp; pic; CSN5; Cdc16; dco; PI31; Fbl6; TER94; Cul4; Lon; ctrip; gus
GO:2000647	6.83665e-05	4.33274	10.1472	21	31	negative regulation of stem cell proliferation	0.000127702	key; CG3560; polo; MED11; brm; MED4; l(2)gl; MED31; Pez; mts; CoIV; MAGE; MED6; tws; CG5214; CoVa; mor; CG7834; Rel; osa; MED10
GO:0006898	6.85323e-05	4.89888	8.8379	19	27	receptor-mediated endocytosis	0.000127843	Eps-15; shi; Clc; fz2; Dab; Su(dx); BicD; Nak; CG8176; Rlip; Cortactin; tok; WASp; Cad99C; cindr; inaC; Rme-8; mim; Cubn
GO:0061061	6.89567e-05	1.64495	84.4511	114	258	muscle structure development	0.000128465	CG13366; DAAM; Actn; usp; mys; flw; Act57B; Egfr; HmgD; gbb; zip; Rac1; pav; Rpd3; mew; Bap60; CG8578; exd; Rok; if; CG5800; Vav; parvin; Mi-2; asf1; MED11; Lasp; Smn; Taf4; brm; flr; Pop2; Prm; msk; MED24; Arp3; Rac2; MED4; ImpL3; fliI; wap; ed; Thor; Pgk; Sec24CD; dock; siz; Ilk; Hem; Snr1; Sec23; Cg25C; vkg; lid; LanB1; numb; hoip; SCAR; Ced-12; Tor; crp; Mhc; mib2; Pax; Mlp84B; unc-45; Mical;…
GO:0007409	7.14961e-05	1.56596	104.418	137	319	axonogenesis	0.00013302	CkIIalpha; AMPKalpha; DAAM; Fas2; Ptp4E; mys; Nrg; Ppt1; Moe; ras; shg; tsr; Chi; betaTub60D; uzip; trio; Sac1; Rac1; alpha-Spec; msn; Strip; Rpd3; Src64B; Dlic; dsh; Gtp-bp; Ptp10D; bif; mew; ben; Rok; if; beta-Spec; RhoGAPp190; Vav; Ulp1; Cdc42; fz2; Dab; Nrt; fax; brm; dlp; Gl; Liprin-beta; caps; Ptp69D; eIF-2beta; aay; dally; pbl; Rac2; velo; LanA; Klp64D; Elp3; Rab5; CG7261; dock; spen; kis;…
GO:0030100	7.32824e-05	3.15194	15.7118	29	48	regulation of endocytosis	0.000136165	Ppt1; Moe; Snap29; prtp; vap; Chc; Tao; Vps60; Rab5; crq; Arf79F; Rbsn-5; numb; l(2)gd1; CaBP1; BicD; Nak; Cortactin; CASK; Nrx-1; Cad99C; cindr; inaC; stmA; AP-2alpha; Lrrk; mim; mnb; mgl
GO:0045995	7.83868e-05	2.32056	28.4777	46	87	regulation of embryonic development	0.000145267	slpr; mago; Rac1; R; msn; Rop; dyl; dsh; hop; Yp3; ben; Top1; Pp2B-14D; Capr; Lasp; blue; eIF-4E; lark; Rac2; LanA; PDZ-GEF; Hrb27C; raw; Pka-C1; dia; mira; Rab11; how; Syx1A; Mtl; WASp; neo; spn-F; mey; stau; RhoGEF2; Khc; Rho1; shark; bic; Nacalpha; TER94; tsu; didum; tyn; nyo
GO:0061351	7.83868e-05	2.32056	28.4777	46	87	neural precursor cell proliferation	0.000145267	crn; ric8a; zip; dlg1; Gbeta13F; eas; CG3560; par-6; Cdc42; polo; MED11; brm; MED4; Galphai; l(2)gl; MED31; mts; numb; Cdk1; CoIV; Dap160; MAGE; Sgt1; MED6; tws; CG5214; CoVa; lkb1; flfl; mor; mira; jar; pins; Apc; CG7834; stau; Rho1; Lis-1; clu; cnn; Ggamma1; osa; bun; MED10; aPKC; mud
GO:0030952	8.07219e-05	3.21192	15.0572	28	46	establishment or maintenance of cytoskeleton polarity	0.000149399	sktl; mago; Chc; blue; Rac2; Klp64D; l(2)gl; Rbsn-5; Pka-C1; Rab6; BicD; poly; lkb1; sqd; Rab11; btz; Apc; spn-F; heph; Eb1; Khc; Rho1; TER94; 14-3-3zeta; chb; egl; msps; kug
GO:0006839	8.57176e-05	2.25666	30.1143	48	92	mitochondrial transport	0.000158438	CG5254; Tom40; tud; Tim10; Letm1; CG32250; sesB; Hsp60; Tim8; Tim9a; Ucp4A; Shawn; Tim9b; Tom20; CG8004; Mpcp; CG32103; CG7394; Bmcp; colt; CG14043; Hsp60C; CG7382; porin; Tom70; CG9399; CG9393; Tpc1; GC1; GC2; Tango9; Dic1; blp; CG31229; Mpc1; CG11779; mfrn; CG1907; CG7943; aralar1; CG11110; CG9090; Roe1; Tom7; att-ORFA; sea; mt:ATPase6; Tim17b
GO:0006818	8.71654e-05	2.65682	20.9491	36	64	hydrogen transport	0.000160484	VhaAC39-1; l(1)G0230; T3dh; blw; CG4692; VhaM9.7-c; Ucp4A; ms(3)72Dt; ATPsyn-b; VhaM9.7-b; Vha26; l(2)06225; Vha100-5; Vha68-2; Vha68-1; VhaSFD; VhaM8.9; Vha55; CG3321; Oscp; Vha100-2; ATPsyn-d; Vha13; ATPsyn-Cf6; Vha100-1; ATPsyn-gamma; CG31030; CG1746; Vha16-1; Vha44; Vha36-1; Vha14-1; VhaAC45; ATPsyn-beta; mt:ATPase6; CG10731
GO:0009896	8.71654e-05	2.65682	20.9491	36	64	positive regulation of catabolic process	0.000160484	wds; sgg; Dcp-1; ida; Upf1; CkIalpha; Atg101; gig; Atg1; vih; Ufd1-like; GlyP; Atg4a; PEK; Cks30A; Utx; bsk; piwi; l(2)gd1; Cdc23; Pomp; pic; GlyS; CSN5; Cdc16; dco; nero; Atg7; Atg9; PI31; Fbl6; TER94; Cul4; Lon; ctrip; gus
GO:0071407	8.71654e-05	2.65682	20.9491	36	64	cellular response to organic cyclic compound	0.000160484	usp; Cbp80; Atg5; Lpt; Nurf-38; E(bx); Atg2; Set2; CG9099; gig; Atg3; ftz-f1; AGO2; Atg1; Atg18a; pzg; CG7172; Hr78; Atg17; r2d2; Utx; loqs; Nbr; CG1091; GlyS; Cbp20; Atg6; Atg16; Ars2; Dcr-2; Atg9; Dg; AGO1; Iswi; Hr46; Hr4
GO:0006352	8.97089e-05	2.32656	27.823	45	85	DNA-templated transcription, initiation	0.000164952	NC2alpha; MED23; TfIIEbeta; Rbp1-like; caz; e(y)1; Taf6; Taf4; Taf2; MED24; MED4; Taf10b; MED15; CycH; MED1; Ssl1; MED31; Gas41; x16; Srp54; TfIIB; Rsf1; NC2beta; Taf7; M1BP; MED6; mtTFB2; Rbp1; TfIIFbeta; MED7; Taf12; B52; NA; MED17; Arc42; MED25; TfIIA-S; TfIIA-L; MED8; Tfb1; Taf5; Mat1; MED26; SC35; MED10
GO:0002831	9.12042e-05	2.51911	23.2404	39	71	regulation of response to biotic stimulus	0.000167484	Spt6; key; PGRP-SA; ptip; Atg18a; Ntf-2; Rm62; me31B; TM9SF4; cact; CG10333; CG9318; ird1; GILT1; MED25; Pebp1; GILT2; SPE; Pli; p38a; puf; Tl; spz; Gprk2; DMAP1; Atg7; imd; Dcr-2; casp; Diap2; Jra; Myd88; Rel; Stat92E; Mt2; Parp; Dredd; Spn42Dd; ird5
GO:0009066	9.28506e-05	8.93043	5.23728	13	16	aspartate family amino acid metabolic process	0.000170066	CG32281; CG11134; CG7860; CG10361; Got2; CG12173; CG9547; CG11334; CG3267; Got1; Sardh; CG32068; CG17486
GO:0016082	9.28506e-05	8.93043	5.23728	13	16	synaptic vesicle priming	0.000170066	Vap-33A; gammaSnap1; Rop; Tomosyn; comt; alphaSnap; Snapin; l(2)gl; Vps45; gammaSnap2; Nsf2; Hrs; Unc-13-4B
GO:0090132	9.31583e-05	1.80589	56.9554	81	174	epithelium migration	0.000170409	dor; usp; csw; Rala; spoon; sqh; mys; Dsor1; shg; Egfr; vir; tsr; zip; Rac1; Girdin; dsh; hop; Evi5; mew; shi; sl; if; par-6; dome; flr; CalpB; nudE; Cbl; sgl; ple; sfl; Ppat-Dpck; Sec5; Rab5; cpb; CG4552; kis; Sec8; stai; Hrb27C; Pvr; bsk; Stam; CG6509; Ced-12; Gli; CG5869; Mhc; Catsup; Ras85D; RhoL; sqd; twf; Akt1; Ppcs; psidin; Rab11; Sec15; Cortactin; CASK; mbc; jar; cindr; 18w; hpo; ena; Sec…
GO:0051261	9.68171e-05	3.35445	13.7478	26	42	protein depolymerization	0.000176873	cpa; tsr; fwd; Klp61F; alpha-Spec; CG12082; Klp10A; beta-Spec; flr; Klp67A; cpb; Csp; Sec8; aux; Gel; fws; bru; Mical; twf; spas; atl; Exo84; Patronin; shot; mlt; chb
GO:0017145	9.82264e-05	2.26074	29.4597	47	90	stem cell division	0.000179216	ric8a; shg; Sara; Zfrp8; zip; hop; dlg1; Gbeta13F; eas; par-6; Cdc42; dally; Galphai; l(2)gl; Gmd; eIF-4a; mts; numb; pelo; Cdk1; piwi; aurB; l(2)gd1; loqs; Sgt1; tws; lkb1; flfl; eff; mira; Rab11; rumi; twin; jar; msi; pins; ALiX; Med; Ote; stau; clu; cnn; shrb; Ggamma1; Stat92E; aPKC; mud
GO:0016331	0.000100671	1.95108	43.8622	65	134	morphogenesis of embryonic epithelium	0.000183439	Rala; Inx2; ct; mys; slpr; Egfr; gbb; zip; Sac1; Rac1; Patj; R; msn; Src64B; dsh; dlg1; Rok; par-6; Vav; Cdc42; pcm; Dab; Nrx-IV; Nmt; Rac2; sinu; ed; Rab5; lwr; l(2)gl; Cg25C; chic; PDZ-GEF; Sec61alpha; mmy; Cka; Btk29A; raw; bsk; Ras85D; knk; yrt; lkb1; flfl; kuk; Rab11; mbc; crb; jar; Mtl; Inx3; alph; cora; ena; RhoGEF2; Rho1; shark; scb; Lac; shn; Jra; Ggamma1; arm; aPKC; Src42A
GO:0016042	0.000102663	2.33289	27.1684	44	83	lipid catabolic process	0.000186589	CG9577; CG3699; CG5966; schlank; CG4586; Acox57D-p; Acox57D-d; Thiolase; CG3376; CG9149; CG42237; Lsd-2; pdgy; Mfe2; sl; CG5162; CG10116; CG12262; CG4267; Mtpalpha; yip2; CG5731; CG17544; CG9319; CG1041; CG4860; CG12428; CDase; CG3267; CG11208; Jheh3; Jheh1; Sply; CG7997; CG6543; Egm; dare; Etf-QO; sPLA2; CG30503; CG5009; CG9527; Jheh2; CG14688
GO:0051962	0.000102663	2.33289	27.1684	44	83	positive regulation of nervous system development	0.000186589	lva; Top3beta; GM130; gbb; trio; Rac1; dsh; dlg1; caz; mbt; Abp1; RhoGAP68F; simj; Arp3; pbl; cpb; Sec23; chic; Mcm10; Dap160; Ras85D; Arfip; Akt1; Pak3; RhoGAP92B; Synd; Rab1; Sar1; spas; alph; Med; shot; drk; stan; ari-1; TBPH; rl; yki; mnb; bun; oc; Ank2; aPKC; Imp
GO:0036445	0.000105292	3.44002	13.0932	25	40	neuronal stem cell division	0.000190388	ric8a; zip; dlg1; Gbeta13F; eas; par-6; Cdc42; Galphai; l(2)gl; mts; numb; Cdk1; Sgt1; tws; lkb1; flfl; mira; jar; pins; stau; clu; cnn; Ggamma1; aPKC; mud
GO:0055057	0.000105292	3.44002	13.0932	25	40	neuroblast division	0.000190388	ric8a; zip; dlg1; Gbeta13F; eas; par-6; Cdc42; Galphai; l(2)gl; mts; numb; Cdk1; Sgt1; tws; lkb1; flfl; mira; jar; pins; stau; clu; cnn; Ggamma1; aPKC; mud
GO:0070371	0.000105292	3.44002	13.0932	25	40	ERK1 and ERK2 cascade	0.000190388	CG3198; Dsor1; mago; Cdc37; Strip; CG10754; Fnta; Cdk12; ksr; betaggt-I; Cka; eIF4AIII; M1BP; Pp1-87B; Sur-8; ATPsyn-d; CG4849; alph; Mob4; Prp19; 14-3-3zeta; Caper; gfzf; Slmap; rl
GO:0070372	0.000105292	3.44002	13.0932	25	40	regulation of ERK1 and ERK2 cascade	0.000190388	CG3198; Dsor1; mago; Cdc37; Strip; CG10754; Fnta; Cdk12; ksr; betaggt-I; Cka; eIF4AIII; M1BP; Pp1-87B; Sur-8; ATPsyn-d; CG4849; alph; Mob4; Prp19; 14-3-3zeta; Caper; gfzf; Slmap; rl
GO:0050829	0.000105823	2.20353	31.0963	49	95	defense response to Gram-negative bacterium	0.000191102	CG32795; Rala; Vap-33A; CBP; Crag; Tim10; Nxt1; key; CG13890; HBS1; Fit1; CG14411; betaCOP; dome; NUCB1; PDCD-5; GstO2; GlyP; Hr78; CG2051; mtd; CG13994; LanB1; Tep2; Wwox; Etl1; SamDC; TM9SF4; unc-45; MED6; CG14722; Pebp1; SPE; Atg6; Pp1alpha-96A; faf; Ars2; imd; casp; Diap2; egr; Su(var)2-10; cathD; Rel; att-ORFA; Dredd; Ide; CG42358; kug
GO:0006890	0.000108373	20.5984	3.60063	10	11	retrograde vesicle-mediated transport, Golgi to ER	0.000194466	Sec22; deltaCOP; Ykt6; alphaCOP; betaCOP; zetaCOP; Use1; epsilonCOP; KdelR; beta'COP
GO:0042147	0.000108373	20.5984	3.60063	10	11	retrograde transport, endosome to Golgi	0.000194466	Vps26; Vps35; CG7197; Snx1; Vps29; CG4074; Snx6; scat; wash; GCC185
GO:0051668	0.000108373	20.5984	3.60063	10	11	localization within membrane	0.000194466	Sec24CD; l(2)gl; Sec23; Vps24; Lam; Sar1; Sec13; LamC; Sec24AB; Sec16
GO:0060260	0.000108373	20.5984	3.60063	10	11	regulation of transcription initiation from RNA polymerase II promoter	0.000194466	NC2alpha; Rbp1-like; x16; Srp54; Rsf1; NC2beta; Rbp1; TfIIFbeta; B52; SC35
GO:2000142	0.000108373	20.5984	3.60063	10	11	regulation of DNA-templated transcription, initiation	0.000194466	NC2alpha; Rbp1-like; x16; Srp54; Rsf1; NC2beta; Rbp1; TfIIFbeta; B52; SC35
GO:0048066	0.000112443	2.15335	32.733	51	100	developmental pigmentation	0.000201514	sdk; dor; pn; Torsin; rb; cm; t; yellow-d; or; Dat; Hexo1; v; dsh; lic; g; car; st; Hn; ple; mal; Sec24CD; Dbp21E2; Sec23; DhpD; cl; santa-maria; CG8552; CG6750; p38b; b; yellow-c; yellow-b; Mkk4; alpha-Man-II; ry; yellow-f2; yellow-e; alpha-Man-IIb; Pk92B; Sar1; pinta; p38a; p38c; Cnx99A; fdl; yellow-h; ltd; lt; ATP7; Duox; mgl
GO:0016477	0.000113179	1.58103	93.9436	124	287	cell migration	0.000202576	dor; usp; csw; crn; Rala; spoon; sqh; sn; mys; Dsor1; shg; Egfr; vir; tsr; zip; Rac1; R; dsh; hop; Evi5; mew; Jafrac1; shi; sl; if; par-6; Vav; Cdc42; dome; nes; fz2; Arl1; caps; flr; prc; CalpB; nudE; Cbl; foi; pbl; qm; Rac2; sgl; ple; sfl; LanA; Ppat-Dpck; Sec5; Rab5; cpb; CG4552; lwr; spen; kis; Hem; Sec8; stai; PDZ-GEF; Hrb27C; LanB1; Ostgamma; Pvr; numb; Mulk; bsk; Stam; SCAR; CG6509; Ced-12…
GO:0006400	0.00011472	7.21395	5.89194	14	18	tRNA modification	0.000203786	CG4045; Nsun2; CG4610; CG32281; CG9596; CG13090; CG6388; l(2)35Bc; CG18528; CG14544; CG8078; Mt2; CG33276; CG15618
GO:0006613	0.00011472	7.21395	5.89194	14	18	cotranslational protein targeting to membrane	0.000203786	TRAM; Gtp-bp; Srp68; SrpRbeta; Srp9; Srp19; Srp54k; Sec61alpha; CG5885; Trp1; Srp72; CG10420; Sec61beta; Srp14
GO:0045047	0.00011472	7.21395	5.89194	14	18	protein targeting to ER	0.000203786	TRAM; Gtp-bp; Srp68; SrpRbeta; Srp9; Sec63; Srp19; Srp54k; Sec61alpha; Trp1; Srp72; CG10420; Sec61beta; Srp14
GO:0046112	0.00011472	7.21395	5.89194	14	18	nucleobase biosynthetic process	0.000203786	su(r); Adgf-A; Adk1; Prat2; ade3; Prat; pyd3; Dhod; Adgf-D; r-l; Dak1; Aprt; CRMP; r
GO:0072599	0.00011472	7.21395	5.89194	14	18	establishment of protein localization to endoplasmic reticulum	0.000203786	TRAM; Gtp-bp; Srp68; SrpRbeta; Srp9; Sec63; Srp19; Srp54k; Sec61alpha; Trp1; Srp72; CG10420; Sec61beta; Srp14
GO:1901800	0.00011472	7.21395	5.89194	14	18	positive regulation of proteasomal protein catabolic process	0.000203786	wds; sgg; ida; CkIalpha; vih; Ufd1-like; Cks30A; Cdc23; Pomp; CSN5; Cdc16; dco; PI31; TER94
GO:0000956	0.000122306	3.65079	11.7839	23	36	nuclear-transcribed mRNA catabolic process	0.000216717	nonC; Upf2; Upf3; DCP1; Pym; Upf1; pcm; Pop2; pix; CG2091; pelo; piwi; Smg5; RnpS1; sqd; Patr-1; twin; Not3; CG8777; PAN2; Pabp2; Not1; cu
GO:0070374	0.000122306	3.65079	11.7839	23	36	positive regulation of ERK1 and ERK2 cascade	0.000216717	CG3198; Dsor1; mago; Cdc37; Strip; CG10754; Fnta; Cdk12; ksr; betaggt-I; Cka; eIF4AIII; M1BP; Pp1-87B; Sur-8; CG4849; Mob4; Prp19; 14-3-3zeta; Caper; gfzf; Slmap; rl
GO:0032872	0.000123644	2.99399	16.0392	29	49	regulation of stress-activated MAPK cascade	0.000217454	SkpA; sgg; Rala; MAPk-Ak2; slpr; flw; cpa; Sac1; CG12082; ben; syd; cpb; ebi; Mnn1; Cka; raw; bsk; ics; Mkk4; lkb1; Pk92B; XNP; ALiX; alph; hppy; Atg9; CG11107; Crk; Alg-2
GO:0042451	0.000123644	2.99399	16.0392	29	49	purine nucleoside biosynthetic process	0.000217454	l(1)G0230; ras; Ppcdc; blw; sesB; nmdyn-D6; Adgf-A; ms(3)72Dt; ATPsyn-b; Ppat-Dpck; fbl; CG5828; l(2)06225; Dpck; Adk3; Adgf-D; CG3321; Oscp; ATPsyn-d; Ppcs; ATPsyn-Cf6; ATPsyn-gamma; CG1746; ATPsyn-beta; Aprt; Sam-S; mt:ATPase6; bur; awd
GO:0045861	0.000123644	2.99399	16.0392	29	49	negative regulation of proteolysis	0.000217454	CG14812; Zw10; Spn77Ba; mad2; Chro; Spn27A; Spn28Dc; alphaTub84B; alphaTub85E; Spn88Ea; CSN5; crb; Bub3; faf; BubR1; Spn42Dc; Spn42De; Spn42Da; cer; Spn55B; casp; Diap2; Mtor; Mad1; CSN4; Spn43Aa; nec; Spn42Dd; CG44008
GO:0046129	0.000123644	2.99399	16.0392	29	49	purine ribonucleoside biosynthetic process	0.000217454	l(1)G0230; ras; Ppcdc; blw; sesB; nmdyn-D6; Adgf-A; ms(3)72Dt; ATPsyn-b; Ppat-Dpck; fbl; CG5828; l(2)06225; Dpck; Adk3; Adgf-D; CG3321; Oscp; ATPsyn-d; Ppcs; ATPsyn-Cf6; ATPsyn-gamma; CG1746; ATPsyn-beta; Aprt; Sam-S; mt:ATPase6; bur; awd
GO:0048103	0.000123644	2.99399	16.0392	29	49	somatic stem cell division	0.000217454	ric8a; shg; Zfrp8; zip; hop; dlg1; Gbeta13F; eas; par-6; Cdc42; Galphai; l(2)gl; mts; numb; Cdk1; Sgt1; tws; lkb1; flfl; mira; jar; pins; stau; clu; cnn; Ggamma1; Stat92E; aPKC; mud
GO:0070302	0.000123644	2.99399	16.0392	29	49	regulation of stress-activated protein kinase signaling cascade	0.000217454	SkpA; sgg; Rala; MAPk-Ak2; slpr; flw; cpa; Sac1; CG12082; ben; syd; cpb; ebi; Mnn1; Cka; raw; bsk; ics; Mkk4; lkb1; Pk92B; XNP; ALiX; alph; hppy; Atg9; CG11107; Crk; Alg-2
GO:0035239	0.000124045	1.3772	197.707	240	604	tube morphogenesis	0.000217889	CG13366; csw; crn; sgg; Fas2; ctp; RhoGAP5A; Act5C; CG5966; sqh; Inx2; ct; sn; mys; fs(1)h; slpr; Nrg; Moe; Zpr1; flw; shg; Egfr; clt; Fkbp14; px; wmd; gbb; Lpt; Galphas; tsr; Chi; spag; zip; Pdk1; trio; Rabex-5; Myo61F; Rac1; Cct1; dlt; ecd; msn; ImpE2; dsh; hop; dlg1; bif; fw; pot; dy; ade5; mew; l(1)G0007; Lsd-2; Stim; Rok; SMC3; if; par-6; CG6398; CG6540; Pfrx; Cdc42; dome; pcm; parvin; alpha…
GO:0001173	0.000131182	Inf	2.61864	8	8	DNA-templated transcriptional start site selection	0.000228156	Rbp1-like; x16; Srp54; TfIIB; Rsf1; Rbp1; B52; SC35
GO:0001174	0.000131182	Inf	2.61864	8	8	transcriptional start site selection at RNA polymerase II promoter	0.000228156	Rbp1-like; x16; Srp54; TfIIB; Rsf1; Rbp1; B52; SC35
GO:0006207	0.000131182	Inf	2.61864	8	8	'de novo' pyrimidine nucleobase biosynthetic process	0.000228156	su(r); Adk1; pyd3; Dhod; r-l; Dak1; CRMP; r
GO:0006999	0.000131182	Inf	2.61864	8	8	nuclear pore organization	0.000228156	Nup93-1; Nup153; CG6540; Nup205; Nup93-2; Ndc1; Gp210; CG8771
GO:0019856	0.000131182	Inf	2.61864	8	8	pyrimidine nucleobase biosynthetic process	0.000228156	su(r); Adk1; pyd3; Dhod; r-l; Dak1; CRMP; r
GO:0042255	0.000131182	Inf	2.61864	8	8	ribosome assembly	0.000228156	sta; eIF6; CG11583; RpS17; mTerf3; CG7338; CG7006; RpL5
GO:0045851	0.000131182	Inf	2.61864	8	8	pH reduction	0.000228156	Rbcn-3B; VhaAC39-1; Vha68-2; Vha68-1; Rab14; Vha55; Vha100-1; Rbcn-3A
GO:0051452	0.000131182	Inf	2.61864	8	8	intracellular pH reduction	0.000228156	Rbcn-3B; VhaAC39-1; Vha68-2; Vha68-1; Rab14; Vha55; Vha100-1; Rbcn-3A
GO:0010631	0.000135093	1.78315	56.628	80	173	epithelial cell migration	0.000234671	dor; usp; csw; Rala; spoon; sqh; mys; Dsor1; shg; Egfr; vir; tsr; zip; Rac1; dsh; hop; Evi5; mew; shi; sl; if; par-6; dome; flr; CalpB; nudE; Cbl; sgl; ple; sfl; Ppat-Dpck; Sec5; Rab5; cpb; CG4552; kis; Sec8; stai; Hrb27C; Pvr; bsk; Stam; CG6509; Ced-12; Gli; CG5869; Mhc; Catsup; Ras85D; RhoL; sqd; twf; Akt1; Ppcs; psidin; Rab11; Sec15; Cortactin; CASK; mbc; jar; cindr; 18w; hpo; ena; Sec6; Rho1;…
GO:0046328	0.000137584	3.0425	15.3845	28	47	regulation of JNK cascade	0.000237561	SkpA; sgg; Rala; MAPk-Ak2; slpr; flw; cpa; Sac1; CG12082; ben; syd; cpb; ebi; Mnn1; Cka; raw; bsk; ics; Mkk4; lkb1; Pk92B; XNP; ALiX; alph; hppy; Atg9; Crk; Alg-2
GO:1903050	0.000137584	3.0425	15.3845	28	47	regulation of proteolysis involved in cellular protein catabolic process	0.000237561	wds; Zw10; sgg; ida; CkIalpha; REG; vih; Ufd1-like; mad2; Chro; Cks30A; Cdc23; Pomp; alphaTub84B; alphaTub85E; CSN5; Cdc16; crb; Bub3; dco; BubR1; Mtor; PI31; Fbl6; TER94; Mad1; CSN4; CG31687
GO:1903362	0.000137584	3.0425	15.3845	28	47	regulation of cellular protein catabolic process	0.000237561	wds; Zw10; sgg; ida; CkIalpha; REG; vih; Ufd1-like; mad2; Chro; Cks30A; Cdc23; Pomp; alphaTub84B; alphaTub85E; CSN5; Cdc16; crb; Bub3; dco; BubR1; Mtor; PI31; Fbl6; TER94; Mad1; CSN4; CG31687
GO:0016476	0.000137597	3.93838	10.4746	21	32	regulation of embryonic cell shape	0.000237561	slpr; Rac1; R; msn; dyl; dsh; hop; Rac2; PDZ-GEF; raw; dia; Rab11; Mtl; WASp; neo; mey; RhoGEF2; Rho1; shark; tyn; nyo
GO:0051306	0.000137597	3.93838	10.4746	21	32	mitotic sister chromatid separation	0.000237561	Zw10; sgg; Moe; slik; ida; vih; mad2; gammaTub23C; Chro; Cks30A; barr; Cdc23; alphaTub84B; alphaTub85E; tws; Cdc16; Bub3; BubR1; Mtor; Mad1; cana
GO:0000302	0.000141865	5.49774	7.20125	16	22	response to reactive oxygen species	0.000244631	fh; Sesn; CG9172; Cat; l(3)neo18; Sod; bsk; p38b; p38a; dj-1beta; CanA1; Sod2; Sod3; rl; Ccs; Rpi
GO:1903651	0.000143598	4.1254	9.81989	20	30	positive regulation of cytoplasmic transport	0.000247317	CHOp24; Crag; Act57B; pav; Stim; U2af50; fu; noi; CG7214; Cas; swm; Fs(2)Ket; eca; Kap-alpha3; Rab11; Sar1; Diap2; Cam; Cul4; Sec16
GO:0042692	0.000145073	2.03318	36.9883	56	113	muscle cell differentiation	0.000249553	CG13366; DAAM; Actn; mys; Act57B; Egfr; zip; Rac1; Rok; if; Vav; Lasp; Smn; flr; Prm; Arp3; Rac2; ImpL3; fliI; Thor; Pgk; dock; siz; Hem; Cg25C; LanB1; numb; SCAR; Ced-12; Tor; Mhc; mib2; Pax; Mlp84B; Mical; sals; foxo; Akt1; Pak3; how; mbc; WASp; Pglym78; Tpi; Khc; Rho1; Dg; Arf51F; Mp20; Pfk; Gapdh1; Crk; Mlc2; pcs; rhea; hts
GO:0006081	0.000147714	5.00751	7.85591	17	24	cellular aldehyde metabolic process	0.000252339	Pgd; Spat; Gip; Tal; CG17333; Zw; Aldh; sgll; AOX3; CG4390; Tpi; CG30499; Aldh-III; CG10638; Adh; Pdxk; Rpi
GO:0006406	0.000147714	5.00751	7.85591	17	24	mRNA export from nucleus	0.000252339	mago; thoc5; Nxt1; thoc7; sbr; thoc6; Trn-SR; tho2; Hpr1; Hel25E; Nup107; Nup160; sqd; Nup133; Nup75; tsu; CG14749
GO:0031122	0.000147714	5.00751	7.85591	17	24	cytoplasmic microtubule organization	0.000252339	Vap-33A; CG7033; Sac1; Tcp-1zeta; CG8142; Grip84; polo; gammaTub23C; dgt2; CG5525; CG8036; Tcp-1eta; CG3731; CG11876; TBCB; CG8258; msps
GO:0032102	0.000147714	5.00751	7.85591	17	24	negative regulation of response to external stimulus	0.000252339	Ulp1; Tor; TM9SF4; CG9318; Ras85D; Bruce; FK506-bp1; Pli; p38a; puf; krz; casp; Jra; Stat92E; Pten; rl; Lrt
GO:0071427	0.000147714	5.00751	7.85591	17	24	mRNA-containing ribonucleoprotein complex export from nucleus	0.000252339	mago; thoc5; Nxt1; thoc7; sbr; thoc6; Trn-SR; tho2; Hpr1; Hel25E; Nup107; Nup160; sqd; Nup133; Nup75; tsu; CG14749
GO:0043901	0.000147763	4.35404	9.16523	19	28	negative regulation of multi-organism process	0.000252339	Cbp80; Hexo2; NA; TSG101; AGO2; TM9SF4; CG9318; Bruce; Cbp20; Rab7; Pli; p38a; puf; Ars2; casp; Jra; shrb; Vps28; Stat92E
GO:0035162	0.000149398	4.6399	8.51057	18	26	embryonic hemopoiesis	0.000254824	sn; mys; shg; asrij; Zfrp8; Rac1; R; if; Cdc42; Rac2; PDZ-GEF; Pvr; Ras85D; RhoL; spas; Mtl; Rho1; chb
GO:0015992	0.000152536	2.58238	20.6218	35	63	proton transport	0.000259863	VhaAC39-1; l(1)G0230; blw; CG4692; VhaM9.7-c; Ucp4A; ms(3)72Dt; ATPsyn-b; VhaM9.7-b; Vha26; l(2)06225; Vha100-5; Vha68-2; Vha68-1; VhaSFD; VhaM8.9; Vha55; CG3321; Oscp; Vha100-2; ATPsyn-d; Vha13; ATPsyn-Cf6; Vha100-1; ATPsyn-gamma; CG31030; CG1746; Vha16-1; Vha44; Vha36-1; Vha14-1; VhaAC45; ATPsyn-beta; mt:ATPase6; CG10731
GO:0009895	0.000168925	3.15675	14.0752	26	43	negative regulation of catabolic process	0.000286747	Zw10; schlank; sesB; Lsd-2; mad2; mio; Chro; Rheb; Sec61alpha; Tor; alphaTub84B; alphaTub85E; Ras85D; Bruce; FK506-bp1; CSN5; Pi3K92E; crb; Bub3; BubR1; Sec61beta; Mtor; Mad1; CSN4; Nup44A; rl
GO:0030951	0.000168925	3.15675	14.0752	26	43	establishment or maintenance of microtubule cytoskeleton polarity	0.000286747	sktl; mago; Chc; blue; Rac2; Klp64D; l(2)gl; Rbsn-5; Pka-C1; Rab6; BicD; poly; lkb1; sqd; Rab11; btz; Apc; spn-F; heph; Eb1; Khc; TER94; 14-3-3zeta; chb; egl; msps
GO:0042052	0.000168925	3.15675	14.0752	26	43	rhabdomere development	0.000286747	GAA1; Moe; tsr; Rac1; Rip11; Gl; fry; msk; Rac2; CG6750; Rab11; rumi; crb; vimar; Sec6; Lis-1; Cam; TER94; p47; Mob2; didum; Pten; grh; oc; PIG-S; tau
GO:0061041	0.000175523	11.3305	4.25529	11	13	regulation of wound healing	0.000296522	Egfr; Rac1; Rok; Cdc42; Rac2; holn1; dia; Mtl; Rho1; rl; grh
GO:0071312	0.000175523	11.3305	4.25529	11	13	cellular response to alkaloid	0.000296522	Atg5; Atg2; gig; Atg3; Atg1; Atg18a; Atg17; GlyS; Atg6; Atg16; Atg9
GO:1902349	0.000175523	11.3305	4.25529	11	13	response to chloroquine	0.000296522	Atg5; Atg2; gig; Atg3; Atg1; Atg18a; Atg17; GlyS; Atg6; Atg16; Atg9
GO:1902350	0.000175523	11.3305	4.25529	11	13	cellular response to chloroquine	0.000296522	Atg5; Atg2; gig; Atg3; Atg1; Atg18a; Atg17; GlyS; Atg6; Atg16; Atg9
GO:0010975	0.00017602	2.36198	24.5497	40	75	regulation of neuron projection development	0.000297008	DAAM; lva; Ppt1; GM130; babos; trio; Rac1; Rpd3; Dlic; dsh; bif; Rok; RhoGAPp190; Cdc42; trc; fry; pbl; Rac2; Elp3; Sec23; chic; Liprin-alpha; Lar; Akt1; Pi3K92E; Rab1; Sar1; spas; CHORD; Adf1; RhoGEF2; unc-104; Rho1; Lis-1; shot; stan; PlexA; TBPH; Pten; Imp
GO:0007291	0.000180422	2.81568	17.0211	30	52	sperm individualization	0.00030371	ctp; Act5C; shi; Chc; nes; Lasp; Dronc; aux; poe; scat; Npc1a; porin; Ance; Bruce; Past1; gish; jar; Osbp; heph; Tango7; Taz; mlt; cbx; Vps28; sw; didum; Dredd; TTLL3B; Cul3; orb2
GO:0040018	0.000180422	2.81568	17.0211	30	52	positive regulation of multicellular organism growth	0.00030371	RpL22; Ns3; CG3527; Rbm13; Dsor1; CG7246; CG3608; Pdk1; CG11583; lic; CG8939; trc; Prpk; dbe; CG7338; Cdk12; RpL35A; Tor; p38b; Tctp; RpL24-like; Akt1; Ns1; tsl; CG7006; Ns2; Rs1; CG5033; PIP4K; raptor
GO:0009408	0.000183229	2.21524	28.4777	45	87	response to heat	0.000308069	Pgam5; slpr; Cdk9; pain; Hsp83; Hsp60; Hsc70-3; NA; shi; Hsc70-1; Hsp23; Hsp27; Hsp26; Hsp67Bc; CG7182; DnaJ-1; tho2; CG5001; CG4164; Hpr1; Hcs; Mnn1; bsk; p38b; RpII33; unc-45; CG11035; Droj2; Hrb87F; TotA; p38a; Hsp68; CG7598; Trap1; GstE1; Hsf; Hsc70-5; l(2)tid; Hsp67Bb; Mt2; Parp; Parg
GO:0019748	0.000185634	2.06867	34.0423	52	104	secondary metabolic process	0.000311742	dor; rb; cm; Nrg; yellow-d; or; Rac1; ecd; v; g; Flo2; Hayan; Vav; car; Cdc42; Spn77Ba; st; Gl; Est-6; Dronc; Shc; Rac2; LanA; mal; MP1; Spn27A; Spn28Dc; bsk; yellow-c; yellow-b; dia; Sp7; RhoL; Cyp304a1; yellow-f2; yellow-e; poly; Tl; Eb1; Vha44; Rho1; Cdk5; Cyp6a8; dare; egr; PPO2; yellow-h; Pten; ltd; lt; Exn; aPKC
GO:0007300	0.000186231	3.22464	13.4205	25	41	ovarian nurse cell to oocyte transport	0.000312003	sqh; flw; Dcp-1; Src64B; rngo; Rok; lark; Ppat-Dpck; cpb; jagn; Hsp60C; chic; Btk29A; SCAR; Catsup; nesd; Ppcs; Cortactin; jar; ena; Khc; Lis-1; pcs; Msp300; hts
GO:0045089	0.000186231	3.22464	13.4205	25	41	positive regulation of innate immune response	0.000312003	CG32795; Crag; key; HBS1; betaCOP; PDCD-5; GNBP3; Hr78; CG2051; mtd; CG13994; LanB1; Etl1; Sp7; Pp1alpha-96A; DMAP1; imd; Su(var)2-10; Rel; att-ORFA; Mt2; Dredd; Ide; CG42358; kug
GO:0010639	0.000194203	2.28459	26.1864	42	80	negative regulation of organelle organization	0.000324973	Zw10; spoon; HP1b; cpa; fwd; Klp61F; alpha-Spec; beta-Spec; Mi-2; flr; RhoGAP68F; JIL-1; msl-3; mad2; CG7261; cpb; Chro; Sec8; Gel; Utx; spel1; CG5869; fws; bru; alphaTub84B; alphaTub85E; Tango9; twf; su(Hw); gish; RhoGAP92B; polybromo; Exo84; Bub3; BubR1; Bap170; Patronin; shot; Mtor; Mad1; chb; CoRest
GO:0009617	0.000198802	1.64322	73.3219	99	224	response to bacterium	0.000332277	ssx; CG32795; Rala; Vap-33A; tyf; CG3527; CBP; Crag; Tim10; CG13551; Nxt1; key; CG13890; Myo61F; HBS1; Jafrac2; Fit1; PGRP-SA; CG2247; Yp3; CG14411; betaCOP; dome; CG7408; NUCB1; PDCD-5; Hsp27; GstO2; Rac2; Thor; CG16712; Npc2a; GlyP; Hr78; CG2051; Pcmt; mtd; CG13994; Tep3; LanB1; Tep2; Wwox; CSN8; Etl1; SamDC; CYLD; bsk; TM9SF4; p38b; Ance; NimB2; Rab14; Tep4; CG9318; CG17919; unc-45; MED6; CG14…
GO:0034250	0.000202813	2.85108	16.3665	29	50	positive regulation of cellular amide metabolic process	0.000338379	tyf; CG5941; eIF-5A; key; PGRP-SA; CG9099; Pex3; Ntf-2; mxt; mTerf3; Rheb; Hrb27C; cact; Pi3K92E; SPE; Tl; spz; Hrb98DE; Dp1; imd; pAbp; stau; Diap2; JhI-1; Myd88; Rel; Parp; Dredd; ird5
GO:0031349	0.000202931	2.47911	21.6038	36	66	positive regulation of defense response	0.000338379	CG32795; Crag; key; HBS1; PGRP-SA; betaCOP; PDCD-5; GNBP3; Hr78; CG2051; mtd; CG13994; LanB1; Etl1; cact; Sp7; GILT1; GILT2; SPE; Pp1alpha-96A; Tl; spz; DMAP1; imd; Diap2; Su(var)2-10; Myd88; Rel; att-ORFA; Mt2; Parp; Dredd; Ide; CG42358; ird5; kug
GO:0002064	0.000221467	1.48826	114.565	146	350	epithelial cell development	0.000368851	Rbf; dor; mip130; usp; csw; sgg; Rala; Femcoat; spoon; sqh; Mcm6; ct; mys; slpr; Cp36; Dsor1; shg; Egfr; Vps20; vir; gbb; tsr; zip; Rac1; alpha-Spec; R; kst; Src64B; dyl; dsh; hop; dlg1; Evi5; shi; sl; kat80; Rok; if; par-6; Cdc42; dome; Tao; Vps60; flr; Klc; Nrx-IV; CalpB; nudE; Cbl; Arp3; Rac2; ndl; Ppat-Dpck; ed; CG3921; Sec5; colt; Rab5; cpb; CG4552; kis; Sec8; Hsp60C; stai; Hrb27C; smt3; r2d…
GO:1902600	0.000223087	2.64335	18.6578	32	57	hydrogen ion transmembrane transport	0.000371112	VhaAC39-1; l(1)G0230; blw; VhaM9.7-c; ms(3)72Dt; ATPsyn-b; VhaM9.7-b; Vha26; l(2)06225; Vha100-5; Vha68-2; Vha68-1; VhaSFD; VhaM8.9; Vha55; CG3321; Oscp; Vha100-2; ATPsyn-d; Vha13; ATPsyn-Cf6; Vha100-1; ATPsyn-gamma; CG31030; CG1746; Vha16-1; Vha44; Vha36-1; Vha14-1; VhaAC45; ATPsyn-beta; mt:ATPase6
GO:0016325	0.00022341	3.38961	12.1112	23	37	oocyte microtubule cytoskeleton organization	0.000371213	sktl; mago; Chc; blue; Rac2; l(2)gl; Rbsn-5; Pka-C1; Rab6; BicD; poly; lkb1; sqd; Rab11; btz; spn-F; heph; Khc; TER94; 14-3-3zeta; chb; egl; msps
GO:0048870	0.000227653	1.53403	97.8716	127	299	cell motility	0.000377818	dor; usp; csw; crn; Rala; spoon; sqh; sn; mys; Dsor1; shg; Egfr; vir; tsr; zip; Rac1; R; dsh; hop; Evi5; mew; Jafrac1; shi; sl; if; par-6; Vav; Cdc42; dome; nes; fz2; Arl1; caps; flr; prc; CalpB; nudE; Cbl; foi; pbl; qm; Rac2; sgl; ple; sfl; LanA; Ppat-Dpck; Sec5; Rab5; cpb; CG4552; lwr; spen; kis; Hem; Sec8; stai; PDZ-GEF; Hrb27C; LanB1; Ostgamma; Pvr; numb; Mulk; bsk; Stam; SCAR; CG6509; Ced-12…
GO:0040014	0.000230406	2.37927	23.2404	38	71	regulation of multicellular organism growth	0.000381939	RpL22; Ns3; CG3527; Rbm13; Dsor1; CG7246; CG3608; Pdk1; Rabex-5; CG11583; lic; CG8939; trc; dally; Prpk; dbe; CG7338; Cdk12; RpL35A; Tor; p38b; Ras85D; Tctp; RpL24-like; foxo; Sdr; Akt1; Ns1; Pi3K92E; tsl; CG7006; wbl; Ns2; Rs1; CG5033; Pten; PIP4K; raptor
GO:0007029	0.00023277	8.24144	4.90995	12	15	endoplasmic reticulum organization	0.000384506	Marf; Arl1; Sec24CD; jagn; Sec23; Rtnl1; wol; Sar1; TER94; ari-1; Sec16; msps
GO:0007040	0.00023277	8.24144	4.90995	12	15	lysosome organization	0.000384506	Vps26; rb; cm; or; g; car; CG14184; SH3PX1; Rab14; Vps45; Vps16B; mv
GO:0080171	0.00023277	8.24144	4.90995	12	15	lytic vacuole organization	0.000384506	Vps26; rb; cm; or; g; car; CG14184; SH3PX1; Rab14; Vps45; Vps16B; mv
GO:0048569	0.000234876	1.37222	183.959	223	562	post-embryonic organ development	0.000387531	CG13366; sgg; Fas2; ctp; RhoGAP5A; CG5966; sqh; ct; sn; mys; fs(1)h; slpr; Nrg; Moe; flw; Egfr; clt; Fkbp14; px; asrij; wmd; gbb; Lpt; Galphas; tsr; Chi; spag; zip; Pdk1; Gale; trio; Rabex-5; Myo61F; Rac1; Cct1; dlt; msn; ImpE2; dsh; hop; dlg1; bif; fw; pot; dy; ade5; mew; l(1)G0007; Lsd-2; Stim; Rok; SMC3; if; CG5800; CG6398; CG6540; Ulp1; Pfrx; Cdc42; pcm; parvin; alphaSnap; Grasp65; trc; rept;…
GO:0007059	0.000236431	1.73059	58.2647	81	178	chromosome segregation	0.000389643	east; Zw10; sgg; mei-9; Moe; flw; CycB; slik; ida; pav; RfC4; Klp10A; bif; Top1; SMC3; Axs; Fim; Mi-2; RecQ5; vih; JIL-1; nudE; eIF-4E; Klp67A; LanA; Rcc1; mad2; mst; gammaTub23C; Rab5; lwr; fbl; Rpn10; Chro; mtm; SA; mts; Cks30A; aurB; Gli; glu; Top2; barr; Cdc23; Mcm10; alphaTub84B; Gie; bel; alphaTub85E; tws; Mcm5; Pp1-87B; MRG15; mats; Cdc16; spas; SMC1; wdb; Sce; Cap-D2; Bub3; ncd; BubR1; Eb…
GO:0045666	0.000242727	3.49119	11.4565	22	35	positive regulation of neuron differentiation	0.000399554	lva; GM130; Rac1; dsh; mbt; pbl; Sec23; chic; Mcm10; Ras85D; Akt1; Rab1; Sar1; spas; alph; shot; drk; stan; TBPH; rl; oc; Imp
GO:0048609	0.000255325	1.25278	381.994	436	1167	multicellular organismal reproductive process	0.000419802	alpha-Cat; CkIIalpha; NA; Rbf; dor; mip130; usp; csw; tko; sgg; Rala; Femcoat; CHOp24; ctp; snf; spoon; Act5C; sqh; wuho; Mcm6; Inx2; ct; sn; mys; slpr; Cp36; Nrg; Moe; Dsor1; Yp1; Yp2; flw; ras; cpa; shg; sktl; mago; tud; Egfr; Rae1; clt; CG10433; Vps20; blw; vir; Dcp-1; gbb; tsr; DCP1; Zfrp8; Nop60B; uri; zip; pain; Peb; Pdk1; fwd; E(bx); Cypl; cue; pUf68; Rac1; Cct1; alpha-Spec; R; ecd; msn; H…
GO:0001667	0.000259363	1.71657	59.2467	82	181	ameboidal-type cell migration	0.000425451	dor; usp; csw; Rala; spoon; sqh; mys; Dsor1; shg; Egfr; vir; tsr; zip; Rac1; dsh; hop; Evi5; mew; shi; sl; if; par-6; dome; flr; CalpB; nudE; Cbl; pbl; sgl; ple; sfl; Ppat-Dpck; Sec5; Rab5; cpb; CG4552; kis; Sec8; stai; Hrb27C; Pvr; bsk; Stam; CG6509; Ced-12; Gli; CG5869; Mhc; Catsup; Ras85D; RhoL; sqd; twf; Akt1; Ppcs; psidin; Rab11; Sec15; Cortactin; CASK; how; mbc; jar; cindr; 18w; hpo; ena; S…
GO:0090130	0.000259363	1.71657	59.2467	82	181	tissue migration	0.000425451	dor; usp; csw; Rala; spoon; sqh; mys; Dsor1; shg; Egfr; vir; tsr; zip; Rac1; Girdin; dsh; hop; Evi5; mew; shi; sl; if; par-6; dome; flr; CalpB; nudE; Cbl; pbl; sgl; ple; sfl; Ppat-Dpck; Sec5; Rab5; cpb; CG4552; kis; Sec8; stai; Hrb27C; Pvr; bsk; Stam; CG6509; Ced-12; Gli; CG5869; Mhc; Catsup; Ras85D; RhoL; sqd; twf; Akt1; Ppcs; psidin; Rab11; Sec15; Cortactin; CASK; mbc; jar; cindr; 18w; hpo; ena…
GO:0009165	0.000260468	1.96379	37.6429	56	115	nucleotide biosynthetic process	0.000426275	e(r); l(1)G0230; ras; Ppcdc; blw; Galphas; CG12016; sesB; ade5; CG9940; nmdyn-D6; ms(3)72Dt; CG10688; nst; ATPsyn-b; CG6767; Prat2; Ppat-Dpck; CG3714; Ts; fbl; CG5828; Gmd; ade2; ade3; RnrL; l(2)06225; Dpck; CG2846; Prat; CG8417; Adk3; foxo; CG3321; Oscp; Dhfr; AdSL; ATPsyn-d; Ppcs; AdSS; r-l; ATPsyn-Cf6; CG11089; Nmnat; Dak1; ATPsyn-gamma; CG2246; Gycbeta100B; CG1746; CG5757; ATPsyn-beta; mt:ATP…
GO:1901293	0.000260468	1.96379	37.6429	56	115	nucleoside phosphate biosynthetic process	0.000426275	e(r); l(1)G0230; ras; Ppcdc; blw; Galphas; CG12016; sesB; ade5; CG9940; nmdyn-D6; ms(3)72Dt; CG10688; nst; ATPsyn-b; CG6767; Prat2; Ppat-Dpck; CG3714; Ts; fbl; CG5828; Gmd; ade2; ade3; RnrL; l(2)06225; Dpck; CG2846; Prat; CG8417; Adk3; foxo; CG3321; Oscp; Dhfr; AdSL; ATPsyn-d; Ppcs; AdSS; r-l; ATPsyn-Cf6; CG11089; Nmnat; Dak1; ATPsyn-gamma; CG2246; Gycbeta100B; CG1746; CG5757; ATPsyn-beta; mt:ATP…
GO:0007552	0.000265709	1.37716	176.103	214	538	metamorphosis	0.000434349	CG13366; east; usp; sgg; Fas2; ctp; RhoGAP5A; CG5966; sqh; ct; sn; mys; fs(1)h; slpr; Nrg; Moe; flw; Egfr; clt; Fkbp14; px; wmd; gbb; Lpt; Galphas; PebIII; tsr; Chi; spag; zip; Pdk1; trio; Rabex-5; Myo61F; Rac1; Cct1; dlt; msn; Atg2; Eip63E; ImpE2; dsh; hop; dlg1; bif; fw; pot; dy; ade5; mew; l(1)G0007; Lsd-2; Stim; Rok; SMC3; if; CG6398; CG6540; Pfrx; Cdc42; pcm; parvin; gig; alphaSnap; Grasp65;…
GO:0006614	0.000275745	6.69702	5.56461	13	17	SRP-dependent cotranslational protein targeting to membrane	0.000449198	TRAM; Gtp-bp; Srp68; SrpRbeta; Srp9; Srp19; Srp54k; Sec61alpha; Trp1; Srp72; CG10420; Sec61beta; Srp14
GO:0046626	0.000275745	6.69702	5.56461	13	17	regulation of insulin receptor signaling pathway	0.000449198	SkpA; ImpL2; pdgy; CG9099; gig; dock; foxo; Ns1; Lnk; dj-1beta; hppy; Cul1; Pten
GO:1900076	0.000275745	6.69702	5.56461	13	17	regulation of cellular response to insulin stimulus	0.000449198	SkpA; ImpL2; pdgy; CG9099; gig; dock; foxo; Ns1; Lnk; dj-1beta; hppy; Cul1; Pten
GO:0051047	0.000280382	3.74992	10.1472	20	31	positive regulation of secretion	0.000455702	CHOp24; CG3608; p24-1; opm; Sec24CD; CG7338; Cdk12; Sec23; RpL35A; Tango1; BicD; eca; Snx3; RhoGAP92B; Rab1; AdipoR; jar; unc-104; Caps; Glut1
GO:0060491	0.000280382	3.74992	10.1472	20	31	regulation of cell projection assembly	0.000455702	DAAM; cpa; tsr; HSPC300; Rac1; par-6; Cdc42; Arp3; cpb; kra; chic; SCAR; Arpc1; dia; twf; psidin; ena; Rho1; shot; aPKC
GO:0051304	0.000284964	2.98102	14.4025	26	44	chromosome separation	0.000462617	Zw10; sgg; mei-9; Moe; slik; ida; vih; mad2; gammaTub23C; Chro; Cks30A; glu; Top2; barr; Cdc23; alphaTub84B; alphaTub85E; tws; Mcm5; MRG15; Cdc16; Bub3; BubR1; Mtor; Mad1; cana
GO:0035264	0.000292457	2.30236	24.2224	39	74	multicellular organism growth	0.000474237	RpL22; Ns3; CG3527; Rbm13; Dsor1; CG7246; CG3608; Pdk1; Rabex-5; CG11583; lic; CG8939; trc; dally; Prpk; dbe; CG7338; Cdk12; Rheb; RpL35A; Tor; p38b; Ras85D; Tctp; RpL24-like; foxo; Sdr; Akt1; Ns1; Pi3K92E; tsl; CG7006; wbl; Ns2; Rs1; CG5033; Pten; PIP4K; raptor
GO:0035011	0.000297168	3.91816	9.49256	19	29	melanotic encapsulation of foreign target	0.000480223	Nrg; Rac1; Flo2; Vav; Cdc42; Gl; Shc; Rac2; LanA; Spn27A; dia; RhoL; poly; Eb1; Cdk5; PPO2; Pten; Exn; aPKC
GO:0051607	0.000297168	3.91816	9.49256	19	29	defense response to virus	0.000480223	key; Vago; hop; AGO2; Atg18a; DIP1; Rm62; r2d2; me31B; CG10333; Atg7; imd; Dcr-2; Rel; Stat92E; Mt2; Dredd; fd68A; ird5
GO:1903532	0.000297168	3.91816	9.49256	19	29	positive regulation of secretion by cell	0.000480223	CHOp24; CG3608; p24-1; opm; Sec24CD; CG7338; Cdk12; Sec23; RpL35A; BicD; eca; Snx3; RhoGAP92B; Rab1; AdipoR; jar; unc-104; Caps; Glut1
GO:0000338	0.000302685	18.534	3.2733	9	10	protein deneddylation	0.000484707	CSN1b; CSN3; CSN8; alien; CSN5; CSN6; Den1; CSN7; CSN4
GO:0006376	0.000302685	18.534	3.2733	9	10	mRNA splice site selection	0.000484707	CG3198; pUf68; Rbp1-like; CG7564; x16; Srp54; Rbp1; B52; SC35
GO:0016032	0.000302685	18.534	3.2733	9	10	viral process	0.000484707	CG14812; Cbp80; AGO2; Sec61alpha; Rack1; ref(2)P; Cbp20; Ars2; TER94
GO:0019058	0.000302685	18.534	3.2733	9	10	viral life cycle	0.000484707	CG14812; Cbp80; AGO2; Sec61alpha; Rack1; ref(2)P; Cbp20; Ars2; TER94
GO:0030422	0.000302685	18.534	3.2733	9	10	production of siRNA involved in RNA interference	0.000484707	Cbp80; AGO2; CG7172; r2d2; loqs; Cbp20; Ars2; Dcr-2; AGO1
GO:0034614	0.000302685	18.534	3.2733	9	10	cellular response to reactive oxygen species	0.000484707	Sod; bsk; p38b; p38a; dj-1beta; Sod2; Sod3; rl; Ccs
GO:0044764	0.000302685	18.534	3.2733	9	10	multi-organism cellular process	0.000484707	CG14812; Cbp80; AGO2; Sec61alpha; Rack1; ref(2)P; Cbp20; Ars2; TER94
GO:0098586	0.000302685	18.534	3.2733	9	10	cellular response to virus	0.000484707	AGO2; Ufd1-like; DIP1; CG7172; Sec61alpha; Npl4; Dcr-2; TER94; fd68A
GO:0032784	0.000304139	5.77047	6.21927	14	19	regulation of DNA-templated transcription, elongation	0.000485934	Spt6; NELF-B; fs(1)h; dre4; TH1; Nelf-E; TfIIS; TfIIFbeta; Sbf; Nelf-A; Spt5; spt4; Cf2; Psf2
GO:0045727	0.000304139	5.77047	6.21927	14	19	positive regulation of translation	0.000485934	tyf; CG5941; eIF-5A; CG9099; mxt; mTerf3; Rheb; Hrb27C; Pi3K92E; Hrb98DE; Dp1; pAbp; stau; JhI-1
GO:0016246	0.000311131	4.12386	8.8379	18	27	RNA interference	0.000495426	Cbp80; Hsc70-3; pcm; AGO2; CG7172; Rm62; r2d2; piwi; loqs; vig; bel; Elp1; Hsc70-4; Cbp20; Ars2; Dcr-2; AGO1; trsn
GO:0045197	0.000311131	4.12386	8.8379	18	27	establishment or maintenance of epithelial cell apical/basal polarity	0.000495426	AMPKalpha; Moe; dsh; dlg1; par-6; Gl; gkt; l(2)gl; Cont; yrt; crb; Exo84; Rho1; shark; Dg; Vps25; Csk; aPKC
GO:0045807	0.000311131	4.12386	8.8379	18	27	positive regulation of endocytosis	0.000495426	Ppt1; Moe; prtp; Chc; Tao; Vps60; Arf79F; numb; CaBP1; BicD; Cortactin; CASK; Nrx-1; Cad99C; cindr; inaC; AP-2alpha; mnb
GO:0051674	0.000313625	1.50872	101.145	130	309	localization of cell	0.000498836	alpha-Cat; dor; usp; csw; crn; Rala; spoon; sqh; sn; mys; Dsor1; shg; Egfr; vir; tsr; zip; Rac1; R; dsh; hop; Evi5; mew; Jafrac1; shi; sl; if; par-6; Vav; Cdc42; dome; nes; fz2; Arl1; caps; flr; prc; CalpB; nudE; Cbl; foi; pbl; qm; Rac2; sgl; ple; sfl; LanA; Ppat-Dpck; Sec5; Rab5; cpb; CG4552; lwr; spen; kis; Hem; Sec8; stai; PDZ-GEF; Hrb27C; LanB1; Ostgamma; Pvr; numb; Mulk; bsk; Stam; SCAR; CG6…
GO:0006378	0.00031956	5.15286	6.87392	15	21	mRNA polyadenylation	0.000505434	CG11418; sbr; IntS9; CG3689; Clp; Sym; bsf; swm; Cpsf73; Cpsf100; IntS11; hrg; Pabp2; Cpsf160; Rrp6
GO:0007160	0.00031956	5.15286	6.87392	15	21	cell-matrix adhesion	0.000505434	Vinc; mys; Rac1; Fit1; dyl; mew; if; Ilk; mesh; scb; muskelin; Ndg; Pten; tyn; Ten-a
GO:0051402	0.00031956	5.15286	6.87392	15	21	neuron apoptotic process	0.000505434	sws; spag; fwe; pix; RpL14; msk; ebi; MAGE; Naam; psidin; RpS3; hpo; TER94; TBPH; futsch
GO:1903052	0.00031956	5.15286	6.87392	15	21	positive regulation of proteolysis involved in cellular protein catabolic process	0.000505434	wds; sgg; ida; CkIalpha; vih; Ufd1-like; Cks30A; Cdc23; Pomp; CSN5; Cdc16; dco; PI31; Fbl6; TER94
GO:1903364	0.00031956	5.15286	6.87392	15	21	positive regulation of cellular protein catabolic process	0.000505434	wds; sgg; ida; CkIalpha; vih; Ufd1-like; Cks30A; Cdc23; Pomp; CSN5; Cdc16; dco; PI31; Fbl6; TER94
GO:0033227	0.00032079	4.38104	8.18324	17	25	dsRNA transport	0.000506246	CG8184; Chc; Arl1; AGO2; Cog3; VhaSFD; ldlCp; CG4572; Srp72; CG5382; AP-2mu; Rab7; Sap-r; Vha16-1; Dcr-2; Bet3; lt
GO:0051489	0.00032079	4.38104	8.18324	17	25	regulation of filopodium assembly	0.000506246	DAAM; cpa; HSPC300; Rac1; par-6; Cdc42; Arp3; cpb; kra; chic; SCAR; Arpc1; dia; ena; Rho1; shot; aPKC
GO:0040012	0.00032403	2.72116	16.6938	29	51	regulation of locomotion	0.000510106	mys; Ppt1; Rac1; dsh; Arl1; ple; LanA; Elp3; Sec61alpha; Liprin-alpha; Stam; Catsup; Lar; CG10830; Rab1; CASK; Nrx-1; ena; unc-104; Rho1; scb; Sin3A; stan; TER94; PlexA; Hrs; Pten; Lrt; sli
GO:0001510	0.000324318	4.71178	7.52858	16	23	RNA methylation	0.000510106	CG4045; Nsun2; CG3527; wuho; CG32281; CG8939; CG9596; CG7818; mtTFB2; CG5220; CG11447; Ime4; CG14544; Hen1; Mt2; CG15618
GO:0010883	0.000324318	4.71178	7.52858	16	23	regulation of lipid storage	0.000510106	deltaCOP; rb; alphaCOP; ImpL2; betaCOP; Indy; zetaCOP; CdsA; Rac2; Arf79F; beta'COP; mdy; foxo; p38c; Acsl; ltd
GO:0045168	0.000342378	1.63412	69.0666	93	211	cell-cell signaling involved in cell fate commitment	0.000537914	CkIIalpha; XRCC1; Mcm6; CG32732; UbcE2H; CG12065; Psf3; CG4692; mri; E(bx); trio; Psf1; dlt; RfC4; dsh; mbt; SMC3; CG8142; gig; CG7668; NA; CSN1b; CG6512; Pgm; Tdrd3; caps; Ptp69D; CG10657; bol; Unr; msk; Rac2; Rab10; mxt; ed; CG16713; CSN3; ArfGAP3; Osi7; CG2091; Rga; Gnf1; Lam; CG9596; Hrb27C; RfC3; Mdh1; Dpy-30L1; CG6509; crol; CG6453; Arpc2; Mcm2; CG8021; MED6; CG16908; CG5608; Surf4; CG7655;…
GO:0016485	0.00034484	2.40965	21.2764	35	65	protein processing	0.000541181	Spase25; Fur2; CalpB; Dronc; MED24; ndl; Spp; RnrL; twr; CG3731; ea; Mdh2; SPE; Spase22-23; tok; nct; Spase12; Drice; CG7791; Spn42Da; CG11110; hpo; wbl; CalpA; cer; ste24a; Tango7; rho-7; RnrS; S2P; sel; CG8728; Fur1; Dredd; Cul3
GO:0032388	0.000353228	3.09489	13.0932	24	40	positive regulation of intracellular transport	0.000552505	CHOp24; Crag; Act57B; pav; Stim; U2af50; fu; Sec5; noi; CG7214; Cas; swm; Fs(2)Ket; eca; Kap-alpha3; Dlc90F; Rab11; Sar1; Lis-1; Diap2; Cam; Dmn; Cul4; Sec16
GO:0050777	0.000353228	3.09489	13.0932	24	40	negative regulation of immune response	0.000552505	Rala; Tim10; Nxt1; E(bx); dome; Spn77Ba; GstO2; GlyP; Lam; Spn27A; Spn28Dc; unc-45; MED6; Pli; p38a; Atg6; puf; faf; casp; Jra; CG1399; Stat92E; Prx5; tefu
GO:1903320	0.000353228	3.09489	13.0932	24	40	regulation of protein modification by small protein conjugation or removal	0.000552505	CkIIalpha; Zw10; rb; Atg8a; Rabex-5; CG12084; ben; fu; car; mad2; Chro; Cand1; Nedd8; alphaTub84B; alphaTub85E; Pli; Bub3; krz; BubR1; Fem-1; Mtor; Fbl6; Mad1; Hrs
GO:0007314	0.000389004	1.98988	34.0423	51	104	oocyte anterior/posterior axis specification	0.000607792	Moe; shg; mago; tud; Egfr; DCP1; Hsp83; Rop; lic; Chc; Lasp; blue; Rac2; l(2)gl; lost; chic; Hrb27C; Rbsn-5; Pka-C1; Ge-1; Rab6; BicD; vls; ik2; E2f2; eIF4AIII; lkb1; sqd; CSN5; mira; Rab11; lsn; Syx1A; btz; spn-F; stau; Khc; Dg; bic; Nacalpha; SmD3; psq; TER94; tsu; didum; csul; glo; mon2; msps; aPKC; gus
GO:0043086	0.000389573	2.16984	26.841	42	82	negative regulation of catalytic activity	0.000608009	CG14812; Zw10; sgg; Patj; par-6; Mkp3; endos; vih; Cbl; mad2; l(2)gl; Chro; CG9135; Spn27A; Spn28Dc; Cks30A; bsk; ics; EndoGI; alphaTub84B; alphaTub85E; eff; Spn88Ea; CSN5; alph; Bub3; krz; BubR1; Spn42Dc; Spn42De; Spn42Da; cer; Spn55B; Diap2; drk; Mtor; Mad1; Spn43Aa; nec; Spn42Dd; pcs; CG44008
GO:0043062	0.000390121	2.56011	18.3305	31	56	extracellular structure organization	0.000608194	Cp36; Crag; flw; sktl; fwd; Pxn; Src64B; Pis; shi; Chc; rngo; polo; LanB2; obst-A; Sec24CD; Sec23; Hsp60C; mmy; LanB1; Btk29A; Cortactin; polybromo; BM-40-SPARC; Cad99C; cindr; pgant3; Pten; Mp; pcs; PI4KIIIalpha; hts
GO:0046822	0.000391387	3.16326	12.4385	23	38	regulation of nucleocytoplasmic transport	0.000609495	sgg; Act57B; Nup214; pav; Stim; U2af50; fu; Trn; Rcc1; noi; CG7214; cact; Cas; swm; Fs(2)Ket; Kap-alpha3; Su(fu); mbo; Akt1; dco; Diap2; Cam; Cul4
GO:0097305	0.000395501	1.92824	37.3156	55	114	response to alcohol	0.000615224	usp; Fas2; CG3011; slpr; Egfr; Lpt; Nurf-38; zip; Pdk1; E(bx); Set2; Clic; vap; CG9099; Tao; rept; Cat; ftz-f1; rogdi; aay; CG3967; MED24; Bacc; aru; l(2)gl; pzg; kra; Spn27A; Akap200; fu12; Aldh; Pka-C1; Utx; bel; CG17734; Arfip; ry; Gclm; klg; BRWD3; rig; hppy; inaC; scb; Arf51F; Iswi; whd; Pka-R2; Drat; Pxd; NA; Adh; rl; moody; Jwa
GO:0001178	0.000401227	Inf	2.29131	7	7	regulation of transcriptional start site selection at RNA polymerase II promoter	0.000616669	Rbp1-like; x16; Srp54; Rsf1; Rbp1; B52; SC35
GO:0006188	0.000401227	Inf	2.29131	7	7	IMP biosynthetic process	0.000616669	ade5; Prat2; ade2; ade3; Prat; Dhfr; AMPdeam
GO:0010592	0.000401227	Inf	2.29131	7	7	positive regulation of lamellipodium assembly	0.000616669	HSPC300; par-6; Cdc42; Arp3; SCAR; psidin; aPKC
GO:0019682	0.000401227	Inf	2.29131	7	7	glyceraldehyde-3-phosphate metabolic process	0.000616669	Pgd; Tal; CG17333; Zw; Tpi; CG30499; Rpi
GO:0035090	0.000401227	Inf	2.29131	7	7	maintenance of apical/basal cell polarity	0.000616669	TSG101; crb; Exo84; Rho1; shark; alc; Vps25
GO:0042273	0.000401227	Inf	2.29131	7	7	ribosomal large subunit biogenesis	0.000616669	CG11583; CG8549; CG4364; CG6724; Ns1; Mys45A; RpL5
GO:0045751	0.000401227	Inf	2.29131	7	7	negative regulation of Toll signaling pathway	0.000616669	Ulp1; lwr; Spn88Ea; Pli; puf; krz; nec
GO:0046040	0.000401227	Inf	2.29131	7	7	IMP metabolic process	0.000616669	ade5; Prat2; ade2; ade3; Prat; Dhfr; AMPdeam
GO:0050792	0.000401227	Inf	2.29131	7	7	regulation of viral process	0.000616669	Cbp80; AGO2; Sec61alpha; Rack1; Cbp20; Ars2; TER94
GO:1902745	0.000401227	Inf	2.29131	7	7	positive regulation of lamellipodium organization	0.000616669	HSPC300; par-6; Cdc42; Arp3; SCAR; psidin; aPKC
GO:1903900	0.000401227	Inf	2.29131	7	7	regulation of viral life cycle	0.000616669	Cbp80; AGO2; Sec61alpha; Rack1; Cbp20; Ars2; TER94
GO:0009311	0.000431961	3.24144	11.7839	22	36	oligosaccharide metabolic process	0.000663185	Treh; pgant6; Hexo1; GalNAc-T2; Pgm; Tps1; pgant5; CG5171; CG5177; CG5731; Pgant35A; CG6453; alpha-Man-II; alpha-Man-IIb; Oga; beta4GalT7; CG7997; GalNAc-T1; fdl; pgant3; Ide; CG1597
GO:0030855	0.000437159	1.42443	131.259	163	401	epithelial cell differentiation	0.000670438	Rbf; dor; mip130; usp; csw; sgg; Rala; Femcoat; spoon; sqh; Mcm6; ct; sn; mys; slpr; Cp36; Dsor1; shg; Egfr; Vps20; vir; gbb; tsr; zip; Rac1; alpha-Spec; R; kst; Src64B; dyl; dsh; hop; dlg1; Evi5; fw; shi; sl; kat80; Rok; SMC3; if; par-6; Cdc42; dome; Tao; trc; Vps60; Gl; flr; CG10732; Klc; Nrx-IV; CalpB; nudE; fry; Cbl; Arp3; Rac2; ndl; Ppat-Dpck; ed; CG3921; Sec5; colt; Rab5; cpb; CG4552; spen;…
GO:0006338	0.000438294	2.02517	31.751	48	97	chromatin remodeling	0.000671449	wds; Act5C; HP1b; dalao; Sgf29; Nap1; Nurf-38; E(bx); Chrac-16; Bap60; Top1; Nup153; Arp8; Mi-2; rept; Chd3; brm; Snr1; Hel25E; Gas41; Su(var)205; Bka; NC2beta; pont; Caf1; MRG15; mor; Arp5; ash2; Mocs2; Nlp; CG7911; Acf1; mle; DMAP1; Dp1; P32; Bap55; Su(var)2-HP2; Iswi; Mtor; tou; MrgBP; Hcf; osa; Chrac-14; Set1; Nipped-A
GO:0007224	0.00044403	2.58043	17.6758	30	54	smoothened signaling pathway	0.000678765	CkIIalpha; Roc1a; sgg; pav; Rpd3; CkIalpha; fu; dlp; Vps36; UbcE2M; sgl; eRF1; mts; Pka-C1; Nedd8; swm; hyx; hyd; Su(fu); Sulf1; eIF-1A; Ubpy; gro; Cad99C; Gprk2; botv; Uba3; ci; Rfabg; l(2)tid
GO:0031331	0.00044403	2.58043	17.6758	30	54	positive regulation of cellular catabolic process	0.000678765	wds; sgg; Dcp-1; ida; Upf1; CkIalpha; Atg101; gig; Atg1; vih; Ufd1-like; GlyP; Atg4a; PEK; Cks30A; Utx; bsk; piwi; Cdc23; Pomp; GlyS; CSN5; Cdc16; dco; nero; Atg7; Atg9; PI31; Fbl6; TER94
GO:0031047	0.000450933	2.43361	19.9671	33	61	gene silencing by RNA	0.000688574	Cbp80; rb; DCP1; Tudor-SN; Hsc70-3; g; pcm; AGO2; CG7172; Rm62; r2d2; me31B; piwi; Ge-1; loqs; vig; Nbr; CG1091; bel; FBXO11; Elp1; Hsc70-4; Atx2; Cbp20; Ars2; HPS4; Dcr-2; Bap55; Dg; AGO1; Hen1; trsn; gw
GO:0033044	0.000451691	1.95513	35.0243	52	107	regulation of chromosome organization	0.000688988	Zw10; sgg; Moe; HP1b; Lpt; Ssrp; slik; dre4; ida; Rpd3; Bap60; Prp3; Mi-2; Trl; vih; JIL-1; msl-3; Ubp64E; mad2; ebi; Chro; LKR; Su(var)205; Cks30A; Utx; crol; Cdc23; alphaTub84B; CG8036; Ibf1; Ibf2; alphaTub85E; tws; Tctp; su(Hw); Cp190; Cdc16; polybromo; vig2; Bub3; Acf1; mle; BubR1; Bap170; Mtor; psq; Mad1; cana; CG31687; CoRest; Sirt6; Parg
GO:0007032	0.000457731	10.298	3.92796	10	12	endosome organization	0.000695948	rush; dor; Strip; car; TSG101; Pi4KIIalpha; CG9135; l(2)gd1; Vha68-2; lsn
GO:0090303	0.000457731	10.298	3.92796	10	12	positive regulation of wound healing	0.000695948	Egfr; Rac1; Rok; Cdc42; Rac2; holn1; dia; Mtl; Rho1; rl
GO:0098754	0.000457731	10.298	3.92796	10	12	detoxification	0.000695948	Sod; Hmt-1; Gclm; Fer2LCH; Fer1HCH; Sod2; NA; Sod3; Ccs
GO:0097485	0.000461216	1.53909	86.0877	112	263	neuron projection guidance	0.000700493	CkIIalpha; AMPKalpha; DAAM; Fas2; Ptp4E; ct; mys; Nrg; Ppt1; Moe; ras; shg; Chi; betaTub60D; uzip; trio; Sac1; Rac1; alpha-Spec; msn; Rpd3; Src64B; dsh; Ptp10D; bif; mew; if; beta-Spec; Vav; Cdc42; fz2; Dab; Nrt; brm; dlp; caps; Ptp69D; eIF-2beta; aay; dally; velo; LanA; Klp64D; Elp3; dock; spen; kis; Ten-m; Snr1; Rheb; kra; chic; Tig; Liprin-alpha; Hrb27C; Glt; bsk; SCAR; Rab6; Tor; EndoGI; Fas3…
GO:0046847	0.000474518	3.33168	11.1292	21	34	filopodium assembly	0.000719152	DAAM; sn; cpa; HSPC300; Rac1; dsh; par-6; Cdc42; Arp3; cpb; kra; chic; SCAR; Arpc1; dia; ena; unc-104; Rho1; shot; mim; aPKC
GO:0048067	0.000474518	3.33168	11.1292	21	34	cuticle pigmentation	0.000719152	Torsin; t; yellow-d; lic; ple; Sec24CD; Sec23; p38b; yellow-c; yellow-b; Mkk4; yellow-f2; yellow-e; Pk92B; Sar1; p38a; p38c; yellow-h; ATP7; Duox; mgl
GO:0014070	0.000501066	1.82918	42.5529	61	130	response to organic cyclic compound	0.000758573	usp; Cbp80; Atg5; Cyp6d2; Lpt; Galphas; Nurf-38; zip; E(bx); Atg2; Set2; CG9099; Tao; gig; rept; Atg3; ftz-f1; AGO2; CG8745; Atg1; Hsp67Bc; Atg18a; MED24; l(2)gl; pzg; CG7172; Hr78; Atg17; r2d2; Utx; loqs; Nbr; MAGE; CG1091; bel; GlyS; Cbp20; Hsp68; Atg6; BRWD3; Atg16; dco; Ars2; Cyp6a2; rig; Hsf; Dcr-2; Atg9; Dg; Cyp6a8; Mdr50; AGO1; Iswi; Hr46; Pka-R2; Cyp12d1-d; Cyp12d1-p; tefu; Duox; moody; H…
GO:0016569	0.000502189	1.74598	50.0815	70	153	covalent chromatin modification	0.000758648	CG11412; wds; CG2982; Sgf29; Lpt; CG2469; Rpd3; Usp7; Set2; HDAC6; e(y)1; rept; brm; ptip; JIL-1; Bre1; Elp3; Taf10b; ebi; Rbbp5; CG2051; Hcs; Hdac3; atms; lid; Gas41; Mnn1; LKR; Su(var)205; Wdr82; borr; Utx; Dpy-30L1; Art8; aurB; NC2beta; hyx; Art4; pont; Art1; Tctp; Taf12; Sbf; Caf1; FK506-bp1; MRG15; Sirt2; wda; ash2; vig2; Mocs2; ball; Sce; DMAP1; Bap55; BEAF-32; Ntmt; MrgBP; Incenp; Hcf; Chr…
GO:0016570	0.000502189	1.74598	50.0815	70	153	histone modification	0.000758648	CG11412; wds; CG2982; Sgf29; Lpt; CG2469; Rpd3; Usp7; Set2; HDAC6; e(y)1; rept; brm; ptip; JIL-1; Bre1; Elp3; Taf10b; ebi; Rbbp5; CG2051; Hcs; Hdac3; atms; lid; Gas41; Mnn1; LKR; Su(var)205; Wdr82; borr; Utx; Dpy-30L1; Art8; aurB; NC2beta; hyx; Art4; pont; Art1; Tctp; Taf12; Sbf; Caf1; FK506-bp1; MRG15; Sirt2; wda; ash2; vig2; Mocs2; ball; Sce; DMAP1; Bap55; BEAF-32; Ntmt; MrgBP; Incenp; Hcf; Chr…
GO:0006260	0.000503543	2.02403	31.0963	47	95	DNA replication	0.000759883	SkpA; Rbf; pn; Mcm3; CG4078; Mcm6; CG2990; pita; CG12018; dre4; RfC4; RPA3; Top1; CG8142; DNApol-delta; Mcm7; DNApol-alpha50; DNApol-alpha60; Gnf1; eIF-4a; Btk29A; Dref; RfC3; RnrL; RfC38; CG10262; Top2; RPA2; Mcm10; E2f2; Mcm2; RpA-70; Mcm5; Blm; lig3; mtSSB; TFAM; DNApol-alpha180; PCNA; Rif1; EndoG; RnrS; Orc6; dpa; mt:CoI; DNApol-alpha73; Psf2
GO:0046488	0.00050506	2.33164	21.6038	35	66	phosphatidylinositol metabolic process	0.000761359	Ocrl; CG4406; Vap-33A; GAA1; CG3160; CG11190; sktl; Synj; fwd; Sac1; CG12006; CG15743; rdgB; CG14411; CG9784; CG17029; CG17027; Pi3K68D; CG6707; Plc21C; CG9391; Pi4KIIalpha; PIG-U; Ipp; Pi3K92E; CG7789; CG6805; CG2292; Pten; PIP4K; CG30381; 5PtaseI; PI4KIIIalpha; Pi3K21B; PIG-S
GO:0035159	0.000518357	3.43701	10.4746	20	32	regulation of tube length, open tracheal system	0.000780572	deltaCOP; Fas2; sqh; zip; dsh; Chc; serp; CG3921; Sec24CD; nrv2; knk; kune; Rho1; conv; garz; stan; Atpalpha; vari; grh; verm
GO:0008105	0.000524383	2.86566	14.0752	25	43	asymmetric protein localization	0.000787968	Crag; Moe; ric8a; shg; mago; Patj; dlg1; Gbeta13F; par-6; Galphai; Rab10; l(2)gl; flfl; mira; jar; pins; btz; Cad99C; stau; egr; Ggamma1; AnxB9; csul; mon2; aPKC
GO:0031124	0.000524383	2.86566	14.0752	25	43	mRNA 3'-end processing	0.000787968	elav; CG11418; sbr; Rbp1-like; IntS9; CG3689; Clp; Sym; x16; Srp54; Rsf1; piwi; bsf; swm; Rbp1; B52; Cpsf73; Cpsf100; IntS11; hrg; cbc; Pabp2; Cpsf160; SC35; Rrp6
GO:0032446	0.000531866	1.61203	68.0846	91	208	protein modification by small protein conjugation	0.000797518	CkIIalpha; Roc1a; SkpA; Zw10; rb; Ubi-p5E; UbcE2H; Atg8a; snama; CG3356; Rabex-5; CG9153; CG12084; CG12099; CG32486; Ubi-p63E; CG1749; ben; CG8184; CG9086; fu; car; CG7427; Ube3a; APP-BP1; Ubc4; CG5087; Cbl; UbcE2M; Uba2; mad2; Bre1; Uev1A; RpL40; Su(dx); lwr; Chro; CG9855; CG11070; smt3; Cnot4; RpS27A; CHIP; Cand1; CG5384; CG5604; Ubc2; CG9934; mib2; Nedd8; alphaTub84B; godzilla; CG11982; alphaT…
GO:0046331	0.000531866	1.61203	68.0846	91	208	lateral inhibition	0.000797518	CkIIalpha; XRCC1; Mcm6; CG32732; UbcE2H; CG12065; Psf3; CG4692; mri; E(bx); trio; Psf1; dlt; RfC4; mbt; SMC3; CG8142; gig; CG7668; NA; CSN1b; CG6512; Pgm; Tdrd3; caps; Ptp69D; CG10657; bol; Unr; msk; Rac2; Rab10; mxt; ed; CG16713; CSN3; ArfGAP3; Osi7; CG2091; Rga; Gnf1; Lam; CG9596; Hrb27C; RfC3; Mdh1; Dpy-30L1; CG6509; crol; CG6453; Arpc2; Mcm2; CG8021; MED6; CG16908; CG5608; Surf4; CG7655; CG31…
GO:0031032	0.000551784	2.24769	23.2404	37	71	actomyosin structure organization	0.000826507	CG13366; DAAM; Ocrl; Actn; mys; tsr; zip; pav; Src64B; shi; Rok; if; polo; Lasp; Smn; flr; RhoGAP68F; Prm; pbl; fliI; chic; SCAR; Mhc; nesd; dia; Mlp84B; Mical; sals; CG5023; how; Rho1; Dg; pnut; Mlc2; Msp300; rhea; hts
GO:0044093	0.00056156	1.80681	43.5349	62	133	positive regulation of molecular function	0.00084026	CkIIalpha; Pgd; Torsin; RhoGAP5A; slpr; Crag; Galphas; Rac1; ecd; msn; Jafrac2; Src64B; lic; vap; Stim; mbt; fu; Vav; gig; Dronc; fry; MED24; Uba2; pbl; CG7261; CG31935; Sec23; Atg17; PDZ-GEF; smt3; Pka-C1; RnrL; Ced-12; RtGEF; ik2; Dap160; CG10068; Mkk4; Aos1; Abi; Atx2; Mdh2; Pk92B; RhoGAP92B; Rlip; Gclm; mbc; CG5521; Drice; hpo; Hsf; Tango7; Galphaq; Cam; RnrS; 14-3-3zeta; Orc6; su(f); RhoGAP1…
GO:0009886	0.000562358	1.35777	170.866	206	522	post-embryonic morphogenesis	0.000840436	CG13366; deltaCOP; sgg; cib; Fas2; ctp; RhoGAP5A; CG5966; sqh; ct; sn; mys; fs(1)h; slpr; Nrg; Moe; flw; Egfr; clt; Fkbp14; px; wmd; gbb; Lpt; Galphas; tsr; Chi; spag; zip; Pdk1; trio; Rabex-5; Myo61F; Rac1; Cct1; dlt; msn; Atg2; ImpE2; dsh; hop; dlg1; bif; fw; pot; dy; ade5; mew; l(1)G0007; Lsd-2; Stim; Rok; SMC3; if; CG6398; CG6540; Pfrx; Cdc42; pcm; parvin; gig; alphaSnap; Grasp65; trc; rept; …
GO:0045926	0.000562867	2.06655	28.805	44	88	negative regulation of growth	0.000840436	SkpA; sgg; Hexo2; Rae1; Sesn; Rabex-5; Src64B; bif; Tao; gig; NA; Capr; TSG101; LanA; ed; rin; foxo; Sdr; Akt1; Patr-1; Rab11; Rab7; spas; crb; WASp; dj-1beta; Mob4; hpo; ena; unc-104; scb; Galphao; shrb; Acsl; Vps28; Mob2; TBPH; Pten; Ide; Csk; nwk; kug; raptor; Src42A
GO:0048707	0.000572316	1.36134	167.265	202	511	instar larval or pupal morphogenesis	0.000853644	CG13366; sgg; Fas2; ctp; RhoGAP5A; CG5966; sqh; ct; sn; mys; fs(1)h; slpr; Nrg; Moe; flw; Egfr; clt; Fkbp14; px; wmd; gbb; Lpt; Galphas; tsr; Chi; spag; zip; Pdk1; trio; Rabex-5; Myo61F; Rac1; Cct1; dlt; msn; Atg2; ImpE2; dsh; hop; dlg1; bif; fw; pot; dy; ade5; mew; l(1)G0007; Lsd-2; Stim; Rok; SMC3; if; CG6398; CG6540; Pfrx; Cdc42; pcm; parvin; gig; alphaSnap; Grasp65; trc; rept; fz2; Mkp3; ftz-…
GO:0006122	0.00057525	7.55279	4.58262	11	14	mitochondrial electron transport, ubiquinol to cytochrome c	0.000856214	CG32649; CG3560; CG7580; CG4169; CG4769; RFeSP; CG3731; CG14482; ox; mt:Cyt-b; Ucrh
GO:0060857	0.00057525	7.55279	4.58262	11	14	establishment of glial blood-brain barrier	0.000856214	pck; Nrg; Nrx-IV; Galphai; sinu; Cont; nrv2; kune; cora; Galphao; moody
GO:0016579	0.000588988	2.91248	13.4205	24	41	protein deubiquitination	0.000874821	CG4165; CG3016; CG3781; CG30421; CG32479; CG12082; Usp7; CG7288; CG7857; Uch-L5; Ubp64E; CG4603; Uch; CG9769; Rpn11; CG4968; CG5384; CYLD; Ubpy; Usp12-46; puf; CG2224; faf; bur
GO:0031330	0.000588988	2.91248	13.4205	24	41	negative regulation of cellular catabolic process	0.000874821	Zw10; sesB; mad2; mio; Chro; Rheb; Sec61alpha; Tor; alphaTub84B; alphaTub85E; Ras85D; Bruce; FK506-bp1; CSN5; Pi3K92E; crb; Bub3; BubR1; Sec61beta; Mtor; Mad1; CSN4; Nup44A; rl
GO:0043473	0.00059707	1.91999	35.3516	52	108	pigmentation	0.000885893	sdk; dor; pn; Torsin; rb; cm; t; yellow-d; or; Dat; Hexo1; v; dsh; lic; g; car; st; Hn; ple; mal; Sec24CD; Dbp21E2; Sec23; DhpD; cl; santa-maria; CG8552; CG6750; p38b; b; yellow-c; yellow-b; Mkk4; Vps16A; alpha-Man-II; ry; yellow-f2; yellow-e; alpha-Man-IIb; Pk92B; Sar1; pinta; p38a; p38c; Cnx99A; fdl; yellow-h; ltd; lt; ATP7; Duox; mgl
GO:0007406	0.000605193	3.71103	9.16523	18	28	negative regulation of neuroblast proliferation	0.000894193	CG3560; polo; MED11; brm; MED4; l(2)gl; MED31; mts; CoIV; MAGE; MED6; tws; CG5214; CoVa; mor; CG7834; osa; MED10
GO:0071456	0.000605193	3.71103	9.16523	18	28	cellular response to hypoxia	0.000894193	eIF2B-beta; Tom40; Letm1; CG17737; Upf1; Ulp1; Tim9b; gig; CG10688; SH3PX1; emb; Vha68-1; l(2)37Cc; CG5844; CG11779; msi; eIF2B-gamma; Hr4
GO:0090316	0.000605193	3.71103	9.16523	18	28	positive regulation of intracellular protein transport	0.000894193	CHOp24; Crag; Act57B; pav; Stim; fu; noi; CG7214; Cas; Fs(2)Ket; eca; Kap-alpha3; Rab11; Sar1; Diap2; Cam; Cul4; Sec16
GO:2000178	0.000605193	3.71103	9.16523	18	28	negative regulation of neural precursor cell proliferation	0.000894193	CG3560; polo; MED11; brm; MED4; l(2)gl; MED31; mts; CoIV; MAGE; MED6; tws; CG5214; CoVa; mor; CG7834; osa; MED10
GO:0050778	0.000633627	2.25292	22.5858	36	69	positive regulation of immune response	0.000935229	CG32795; Crag; key; HBS1; PGRP-SA; betaCOP; PDCD-5; GNBP3; Ntf-2; Hr78; CG2051; mtd; CG13994; LanB1; Etl1; cact; Sp7; psidin; SPE; Pp1alpha-96A; Tl; spz; DMAP1; imd; Diap2; Su(var)2-10; Myd88; Rel; att-ORFA; Mt2; Parp; Dredd; Ide; CG42358; ird5; kug
GO:0003382	0.000644529	3.89379	8.51057	17	26	epithelial cell morphogenesis	0.000950234	sgg; sqh; dyl; hop; Rok; colt; dia; WASp; neo; Gprk2; mey; ena; tyn; CG41099; grh; nyo; aPKC
GO:0009069	0.00065253	6.18034	5.23728	12	16	serine family amino acid metabolic process	0.000950234	CG3011; CG7430; aay; Cbs; ppl; CG6415; CG12264; CG3999; Dhfr; CG11899; SelD; Sardh
GO:0030522	0.00065253	6.18034	5.23728	12	16	intracellular receptor signaling pathway	0.000950234	Lpt; Nurf-38; E(bx); Chd64; Set2; CG9099; ftz-f1; pzg; FK506-bp1; Iswi; TBPH; Hr4
GO:0031050	0.00065253	6.18034	5.23728	12	16	dsRNA fragmentation	0.000950234	Cbp80; AGO2; CG7172; r2d2; loqs; Nbr; CG1091; Cbp20; Ars2; Dcr-2; Dg; AGO1
GO:0034637	0.00065253	6.18034	5.23728	12	16	cellular carbohydrate biosynthetic process	0.000950234	Pgm; sgl; sfl; Tps1; CG5171; CG5177; Rack1; GlyS; botv; AGBE; Inos; PhKgamma
GO:0035126	0.00065253	6.18034	5.23728	12	16	post-embryonic genitalia morphogenesis	0.000950234	Fas2; mys; slpr; Myo61F; Rab5; Pvr; Myo31DF; bsk; scaf; ix; Vps25; tnc
GO:0043331	0.00065253	6.18034	5.23728	12	16	response to dsRNA	0.000950234	Cbp80; AGO2; CG7172; r2d2; loqs; Nbr; CG1091; Cbp20; Ars2; Dcr-2; Dg; AGO1
GO:0048805	0.00065253	6.18034	5.23728	12	16	imaginal disc-derived genitalia morphogenesis	0.000950234	Fas2; mys; slpr; Myo61F; Rab5; Pvr; Myo31DF; bsk; scaf; ix; Vps25; tnc
GO:0060856	0.00065253	6.18034	5.23728	12	16	establishment of blood-brain barrier	0.000950234	pck; Nrg; Nrx-IV; Galphai; sinu; cold; Cont; nrv2; kune; cora; Galphao; moody
GO:0070918	0.00065253	6.18034	5.23728	12	16	production of small RNA involved in gene silencing by RNA	0.000950234	Cbp80; AGO2; CG7172; r2d2; loqs; Nbr; CG1091; Cbp20; Ars2; Dcr-2; Dg; AGO1
GO:0071359	0.00065253	6.18034	5.23728	12	16	cellular response to dsRNA	0.000950234	Cbp80; AGO2; CG7172; r2d2; loqs; Nbr; CG1091; Cbp20; Ars2; Dcr-2; Dg; AGO1
GO:0097352	0.00065253	6.18034	5.23728	12	16	autophagosome maturation	0.000950234	dor; Snap29; Syx17; car; NA; Vps16A; Vps39; Vha100-1; Vps25; Vps28; Vamp7; lt
GO:0097576	0.00065253	6.18034	5.23728	12	16	vacuole fusion	0.000950234	dor; Snap29; Syx17; car; NA; Vps16A; Vps39; Vha100-1; Vps25; Vps28; Vamp7; lt
GO:0071705	0.000662329	1.66524	57.2827	78	175	nitrogen compound transport	0.000963512	CG12773; sta; CG2930; CG3556; Cbp80; RpS28b; mago; tud; CG10320; thoc5; Nxt1; CG3608; thoc7; ABCB7; sbr; sesB; Dlic; CG8184; Chc; U2af50; CG5535; Arl1; AGO2; mnd; Gl; Ncc69; thoc6; path; cert; Cog3; Trn-SR; colt; tho2; CG7338; Cdk12; Hpr1; RpL35A; Hel25E; Ent2; Nup107; Nup160; dmGlut; VhaSFD; BicD; swm; CD98hc; Tpc1; GC1; GC2; sqd; ldlCp; Hmt-1; Akt1; CG4572; Srp72; Rab1; CG5382; AP-2mu; AdipoR; …
GO:2000241	0.000663817	2.34941	20.2944	33	62	regulation of reproductive process	0.000964684	CHOp24; mago; Cypl; Rop; dlg1; p24-1; opm; Lasp; blue; Atg1; Est-6; Hrb27C; Pka-C1; mdy; p24-2; eca; Bruce; mira; Rab11; Syx1A; bai; spn-F; stau; Khc; Dp; bic; Nacalpha; TER94; tsu; didum; Ide; loj; CG11700
GO:0006935	0.000671463	1.50426	90.343	116	276	chemotaxis	0.000974794	CkIIalpha; AMPKalpha; DAAM; Fas2; Ptp4E; ct; mys; Nrg; Ppt1; Moe; ras; shg; Chi; betaTub60D; uzip; trio; Sac1; Rac1; alpha-Spec; msn; Rpd3; Src64B; Con; dsh; Ptp10D; bif; mew; if; beta-Spec; Vav; Cdc42; fz2; Dab; Nrt; brm; dlp; caps; Ptp69D; eIF-2beta; aay; dally; velo; LanA; Klp64D; Elp3; dock; spen; kis; Ten-m; Snr1; Rheb; kra; chic; Tig; Liprin-alpha; Hrb27C; Glt; bsk; SCAR; Rab6; Tor; EndoGI;…
GO:0018205	0.000676583	1.86457	37.9703	55	116	peptidyl-lysine modification	0.000981219	CG11412; wds; Sgf29; Lpt; Rpd3; Set2; e(y)1; Ulp1; rept; brm; ptip; CG3967; CG8005; Uba2; velo; Elp3; Taf10b; lwr; Rbbp5; CG2051; Hcs; Hdac3; lid; smt3; Gas41; Mnn1; Su(var)205; Wdr82; Utx; Dpy-30L1; NC2beta; pont; Taf12; Sbf; Aos1; Caf1; MRG15; wda; ash2; vig2; Mocs2; nero; krz; DMAP1; Bap55; BEAF-32; MrgBP; Hcf; Chrac-14; Set1; yki; CG12560; CoRest; Nipped-A; Parg
GO:0010821	0.000677527	4.12232	7.85591	16	24	regulation of mitochondrion organization	0.000981581	CG14786; Pgam5; pn; Marf; HLH106; CG7603; CG6878; Sod; Thor; Drp1; mTerf3; bsf; Tango9; Fis1; Sod2; Opa1
GO:0048232	0.000679815	1.5124	87.7244	113	268	male gamete generation	0.000983888	ctp; Act5C; wuho; sktl; Egfr; Rae1; blw; uri; Pdk1; fwd; E(bx); cue; Hsp83; Ubi-p63E; shi; Chc; Cdc42; Grip84; pcm; polo; Kap-alpha1; Mi-2; ms(3)76Cc; nes; CSN1b; Lasp; Baldspot; ms(3)72Dt; Trl; Pex1; Dronc; eIF-4E; Klp67A; bol; sfl; Pex12; fbl; CSN3; Sec8; aux; Lam; Hsp60C; ifc; chic; poe; CG8552; alien; scat; pelo; Npc1a; Cdk1; nmd; piwi; porin; CG12404; Ance; Gli; Syx5; fws; Lar; bru; dia; lds…
GO:0046854	0.000694413	5.35697	5.89194	13	18	phosphatidylinositol phosphorylation	0.00100296	fwd; CG15743; CG17029; CG17027; Pi3K68D; CG9391; Pi4KIIalpha; Ipp; Pi3K92E; CG7789; PIP4K; PI4KIIIalpha; Pi3K21B
GO:0050688	0.000694413	5.35697	5.89194	13	18	regulation of defense response to virus	0.00100296	key; Atg18a; Rm62; me31B; CG10333; Atg7; imd; Dcr-2; Rel; Stat92E; Mt2; Dredd; ird5
GO:0010466	0.000708	4.80815	6.54659	14	20	negative regulation of peptidase activity	0.00101946	CG14812; Spn27A; Spn28Dc; Spn88Ea; Spn42Dc; Spn42De; Spn42Da; cer; Spn55B; Diap2; Spn43Aa; nec; Spn42Dd; CG44008
GO:0043523	0.000708	4.80815	6.54659	14	20	regulation of neuron apoptotic process	0.00101946	spag; fwe; pix; RpL14; msk; ebi; MAGE; Naam; psidin; RpS3; hpo; TER94; TBPH; futsch
GO:0048138	0.000708	4.80815	6.54659	14	20	germ-line cyst encapsulation	0.00101946	shg; Egfr; Src64B; CSN1b; CSN3; alien; CSN5; Ppcs; CSN6; Ime4; Sce; Cul2; CSN7; CSN4
GO:0006090	0.000737836	3.02498	12.1112	22	37	pyruvate metabolic process	0.00105811	l(1)G0334; Pdp; CG10932; Hex-A; Gapdh2; Pfrx; ImpL3; Pgk; Eno; CG5261; Aldh; Mpc1; Ald; CG31075; Men-b; CG11876; Pglym78; Tpi; Dg; Pfk; Pgi; Gapdh1
GO:0016052	0.000737836	3.02498	12.1112	22	37	carbohydrate catabolic process	0.00105811	l(1)G0334; Hex-A; Gapdh2; Pfrx; Pgm; Atg1; ImpL3; Pgk; GlyP; Eno; CG12582; GlyS; Ald; Pglym78; Tpi; Dg; Pfk; Pmm45A; Pgi; Gapdh1; PhKgamma; CG6910
GO:0031348	0.000737836	3.02498	12.1112	22	37	negative regulation of defense response	0.00105811	Rala; Tim10; Nxt1; E(bx); Ulp1; dome; Spn77Ba; GstO2; GlyP; Spn27A; Spn28Dc; TM9SF4; CG9318; unc-45; MED6; Atg6; puf; faf; krz; casp; Prx5; tefu
GO:0051983	0.000737836	3.02498	12.1112	22	37	regulation of chromosome segregation	0.00105811	east; Zw10; sgg; Moe; slik; ida; Mi-2; vih; mad2; Chro; Cks30A; Cdc23; alphaTub84B; alphaTub85E; tws; Cdc16; Bub3; BubR1; Mtor; Mad1; cana; CG31687
GO:0007283	0.000761019	1.50855	87.0697	112	266	spermatogenesis	0.00109025	ctp; Act5C; wuho; sktl; Egfr; Rae1; blw; uri; Pdk1; fwd; E(bx); cue; Hsp83; Ubi-p63E; shi; Chc; Cdc42; Grip84; pcm; polo; Kap-alpha1; Mi-2; ms(3)76Cc; nes; CSN1b; Lasp; Baldspot; ms(3)72Dt; Trl; Pex1; Dronc; eIF-4E; bol; sfl; Pex12; fbl; CSN3; Sec8; aux; Lam; Hsp60C; ifc; chic; poe; CG8552; alien; scat; pelo; Npc1a; Cdk1; nmd; piwi; porin; CG12404; Ance; Gli; Syx5; fws; Lar; bru; dia; lds; bel; h…
GO:0009719	0.000775346	1.58456	68.7392	91	210	response to endogenous stimulus	0.00110966	SkpA; usp; CG14812; csw; Atg5; Sara; Cyp6d2; gbb; Galphas; MAN1; Pdk1; trio; RpL8; Atg2; CG14977; ImpL2; Chd64; PGRP-SA; lic; pdgy; sl; CG9099; fu; kek5; Cdc42; Tao; gig; CG14184; Atg3; ftz-f1; CG8745; Atg1; nst; Hsp67Bc; dally; Atg18a; sgl; sfl; Dd; dock; lwr; l(2)gl; Hr78; Atg17; smt3; Pvr; Stam; p38b; CG5110; MAGE; poly; foxo; GlyS; FK506-bp1; cv-d; Akt1; Ns1; Pi3K92E; AdipoR; Hsp68; Atg6; Lnk…
GO:0006261	0.000835857	2.26446	21.2764	34	65	DNA-dependent DNA replication	0.00119028	SkpA; Rbf; pn; Mcm3; Mcm6; CG2990; pita; dre4; RfC4; DNApol-delta; Mcm7; DNApol-alpha50; DNApol-alpha60; eIF-4a; Btk29A; Dref; Top2; RPA2; Mcm10; E2f2; Mcm2; RpA-70; Mcm5; lig3; TFAM; DNApol-alpha180; PCNA; Rif1; EndoG; Orc6; dpa; mt:CoI; DNApol-alpha73; Psf2
GO:0009620	0.000835857	2.26446	21.2764	34	65	response to fungus	0.00119028	shg; Phm; Drsl5; Tsf1; Hsp27; GNBP3; AIF; spen; MP1; Spn27A; Trx-2; Ge-1; Rab6; p38b; cact; Tep4; pic; SPE; p38a; Tl; spz; pll; Obp99c; Fer2LCH; Fer1HCH; CalpA; Hsf; Myd88; PPO2; nec; Rel; Spn42Dd; Lmpt; coro
GO:0010388	0.000837571	16.4706	2.94597	8	9	cullin deneddylation	0.00119028	CSN1b; CSN3; CSN8; alien; CSN5; CSN6; CSN7; CSN4
GO:0033108	0.000837571	16.4706	2.94597	8	9	mitochondrial respiratory chain complex assembly	0.00119028	CG9172; Surf1; CG4908; bsf; CG11722; CG17726; CG7598; CG44194
GO:0033962	0.000837571	16.4706	2.94597	8	9	cytoplasmic mRNA processing body assembly	0.00119028	LSm1; DCP1; pcm; me31B; Ge-1; Patr-1; LSm3; stau
GO:0043162	0.000837571	16.4706	2.94597	8	9	ubiquitin-dependent protein catabolic process via the multivesicular body sorting pathway	0.00119028	Vps20; Vps36; lsn; Vps2; ALiX; shrb; Vps25; Vps28
GO:0051453	0.000837571	16.4706	2.94597	8	9	regulation of intracellular pH	0.00119028	Rbcn-3B; VhaAC39-1; Vha68-2; Vha68-1; Rab14; Vha55; Vha100-1; Rbcn-3A
GO:0045746	0.000839409	2.71451	14.4025	25	44	negative regulation of Notch signaling pathway	0.00119169	dor; ct; Eps-15; dsh; car; asf1; Su(dx); l(2)gl; numb; Utx; l(2)gd1; Dap160; Vps16A; AP-1mu; Usp12-46; rumi; crb; Vps2; krz; O-fut1; stan; shrb; lt; uif; bun
GO:0001558	0.000872515	2.3699	18.9851	31	58	regulation of cell growth	0.00123745	AMPKalpha; Sesn; Pdk1; pUf68; Rac1; dsh; bif; sl; gig; Atg1; eIF-4E; vito; Prpk; Thor; Rheb; Liprin-alpha; Tor; Lar; RagA-B; Ras85D; foxo; Akt1; Pi3K92E; puf; dco; shot; stan; JhI-1; Pten; PIP4K; bun
GO:0030705	0.000878752	2.51217	16.6938	28	51	cytoskeleton-dependent intracellular transport	0.00124504	Vap-33A; sqh; Marf; fh; Sac1; Dlic; Lsd-2; fu; Gl; Atg1; syd; Klp64D; stai; hk; Arp1; Dlc90F; Rab1; jar; htt; Mob4; unc-104; Khc; Lis-1; Dmn; sw; didum; futsch; Lrrk
GO:0048640	0.000897616	2.1864	22.9131	36	70	negative regulation of developmental growth	0.0012705	SkpA; sgg; Rae1; Rabex-5; Src64B; bif; Tao; gig; Capr; TSG101; LanA; ed; rin; foxo; Sdr; Akt1; Patr-1; Rab11; spas; crb; WASp; dj-1beta; Mob4; hpo; ena; unc-104; scb; Galphao; Acsl; Mob2; TBPH; Pten; nwk; kug; raptor; Src42A
GO:0060562	0.000901238	1.32493	186.905	222	571	epithelial tube morphogenesis	0.00127435	CG13366; csw; crn; sgg; Fas2; ctp; RhoGAP5A; CG5966; sqh; ct; sn; mys; fs(1)h; slpr; Nrg; Moe; Zpr1; flw; shg; Egfr; clt; Fkbp14; px; wmd; gbb; Lpt; Galphas; tsr; Chi; spag; zip; Pdk1; trio; Rabex-5; Myo61F; Rac1; Cct1; dlt; ecd; msn; ImpE2; dsh; hop; dlg1; bif; fw; pot; dy; ade5; mew; l(1)G0007; Lsd-2; Stim; Rok; SMC3; if; par-6; CG6398; CG6540; Pfrx; Cdc42; pcm; parvin; alphaSnap; Grasp65; trc;…
GO:0006626	0.000912847	3.17225	10.8019	20	33	protein targeting to mitochondrion	0.00128307	Tom40; Tim10; Hsp60; Tim8; Tim9a; Tim9b; Tom20; CG8004; CG7394; Hsp60C; CG7382; Tom70; CG9393; blp; CG31229; CG11779; CG11110; Roe1; Tom7; Tim17b
GO:0007091	0.000912847	3.17225	10.8019	20	33	metaphase/anaphase transition of mitotic cell cycle	0.00128307	Zw10; sgg; Moe; slik; ida; vih; mad2; Chro; Cks30A; Cdc23; alphaTub84B; alphaTub85E; tws; Cdc16; Bub3; BubR1; Mtor; Mad1; cana; CG31687
GO:0044784	0.000912847	3.17225	10.8019	20	33	metaphase/anaphase transition of cell cycle	0.00128307	Zw10; sgg; Moe; slik; ida; vih; mad2; Chro; Cks30A; Cdc23; alphaTub84B; alphaTub85E; tws; Cdc16; Bub3; BubR1; Mtor; Mad1; cana; CG31687
GO:0061572	0.000912847	3.17225	10.8019	20	33	actin filament bundle organization	0.00128307	DAAM; Actn; ctp; sn; mys; Rac1; Src64B; dsh; Rok; if; RhoGAP68F; Rac2; ed; ik2; Mtl; Khc; Rho1; wash; hts; Src42A
GO:0070585	0.000912847	3.17225	10.8019	20	33	protein localization to mitochondrion	0.00128307	Tom40; Tim10; Hsp60; Tim8; Tim9a; Tim9b; Tom20; CG8004; CG7394; Hsp60C; CG7382; Tom70; CG9393; blp; CG31229; CG11779; CG11110; Roe1; Tom7; Tim17b
GO:0072655	0.000912847	3.17225	10.8019	20	33	establishment of protein localization to mitochondrion	0.00128307	Tom40; Tim10; Hsp60; Tim8; Tim9a; Tim9b; Tom20; CG8004; CG7394; Hsp60C; CG7382; Tom70; CG9393; blp; CG31229; CG11779; CG11110; Roe1; Tom7; Tim17b
GO:0045862	0.00100332	2.53224	16.0392	27	49	positive regulation of proteolysis	0.00140883	wds; sgg; Jafrac2; ida; CkIalpha; vih; Ufd1-like; Dronc; MED24; Cks30A; RnrL; Cdc23; ik2; Pomp; CSN5; Mdh2; Cdc16; Drice; dco; krz; hpo; Tango7; RnrS; PI31; Fbl6; TER94; Cul3
GO:0046434	0.00100899	3.26436	10.1472	19	31	organophosphate catabolic process	0.00141539	pn; cN-IIIB; CG3376; sl; CG17029; CG17027; CG17224; CG9391; CG8891; Gpdh; Ipp; Plip; CG6330; Mesh1; veil; Dg; CG8525; Pten; 5PtaseI
GO:0031400	0.0010103	2.01773	27.823	42	85	negative regulation of protein modification process	0.00141582	CkIIalpha; SkpA; Zw10; sgg; Rala; flw; cpa; Sac1; Patj; CG12082; par-6; Mkp3; endos; vih; Cbl; mad2; cpb; ebi; l(2)gl; Chro; Mnn1; raw; Cks30A; Cand1; Utx; bsk; ics; alphaTub84B; alphaTub85E; eff; CSN5; ATPsyn-d; alph; Bub3; krz; BubR1; drk; Mtor; Mad1; Hrs; pcs; CoRest
GO:0051604	0.00103225	2.1898	22.2584	35	68	protein maturation	0.00144515	Spase25; Fur2; CalpB; Dronc; MED24; ndl; Spp; RnrL; twr; CG3731; ea; Mdh2; SPE; Spase22-23; tok; nct; Spase12; Drice; CG7791; Spn42Da; CG11110; hpo; wbl; CalpA; cer; ste24a; Tango7; rho-7; RnrS; S2P; sel; CG8728; Fur1; Dredd; Cul3
GO:0016358	0.0010499	1.5421	73.6492	96	225	dendrite development	0.00146841	AMPKalpha; usp; lva; ct; sn; Nrg; HmgD; GM130; babos; Chi; E(bx); Rac1; MEP-1; Rpd3; Dlic; Bap60; Ulp1; Cdc42; Mi-2; trc; asf1; MED11; ftz-f1; CG9705; mbf1; Taf4; brm; Aats-gly; Ptp69D; Ube3a; Dronc; fry; path; dally; MED24; MED4; velo; Rab5; CG7261; Snr1; Sec23; Gnf1; smt3; Dref; Tor; CG17912; Nak; Mtp; Aats-trp; Mical; foxo; Caf1; Akt1; Arc42; Sirt2; Pi3K92E; meigo; Rab1; Sar1; spas; SMC1; CHOR…
GO:0015988	0.00107524	2.79044	13.0932	23	40	energy coupled proton transmembrane transport, against electrochemical gradient	0.0014994	VhaAC39-1; blw; VhaM9.7-c; ms(3)72Dt; VhaM9.7-b; Vha26; Vha100-5; Vha68-2; Vha68-1; VhaSFD; VhaM8.9; Vha55; Vha100-2; Vha13; Vha100-1; CG31030; CG1746; Vha16-1; Vha44; Vha36-1; Vha14-1; VhaAC45; ATPsyn-beta
GO:0015991	0.00107524	2.79044	13.0932	23	40	ATP hydrolysis coupled proton transport	0.0014994	VhaAC39-1; blw; VhaM9.7-c; ms(3)72Dt; VhaM9.7-b; Vha26; Vha100-5; Vha68-2; Vha68-1; VhaSFD; VhaM8.9; Vha55; Vha100-2; Vha13; Vha100-1; CG31030; CG1746; Vha16-1; Vha44; Vha36-1; Vha14-1; VhaAC45; ATPsyn-beta
GO:0032506	0.00107524	2.79044	13.0932	23	40	cytokinetic process	0.0014994	Ocrl; Zw10; Moe; flw; tsr; fwd; pav; shi; polo; pbl; Rint1; Sec8; chic; fws; bru; dia; Synd; Rab11; Exo84; Cog7; Rho1; pnut; slam
GO:0007173	0.00108916	2.12231	23.8951	37	73	epidermal growth factor receptor signaling pathway	0.00151582	csw; Fas2; Nrg; mago; Egfr; Vps20; sl; Chmp1; brm; mop; Shc; Cbl; msk; dod; ed; aru; ebi; spen; holn1; Stam; Sulf1; Pi3K92E; lsn; Vps2; Bap170; hppy; Rho1; fus; drk; tsu; shrb; Vps25; Vps28; osa; Hrs; rl; Src42A
GO:0038127	0.00108916	2.12231	23.8951	37	73	ERBB signaling pathway	0.00151582	csw; Fas2; Nrg; mago; Egfr; Vps20; sl; Chmp1; brm; mop; Shc; Cbl; msk; dod; ed; aru; ebi; spen; holn1; Stam; Sulf1; Pi3K92E; lsn; Vps2; Bap170; hppy; Rho1; fus; drk; tsu; shrb; Vps25; Vps28; osa; Hrs; rl; Src42A
GO:0009142	0.00110923	3.37326	9.49256	18	29	nucleoside triphosphate biosynthetic process	0.0015377	l(1)G0230; blw; sesB; nmdyn-D6; ms(3)72Dt; ATPsyn-b; l(2)06225; CG3321; Oscp; ATPsyn-d; ATPsyn-Cf6; ATPsyn-gamma; CG1746; CG5757; ATPsyn-beta; mt:ATPase6; awd; CTPsyn
GO:0051965	0.00110923	3.37326	9.49256	18	29	positive regulation of synapse assembly	0.0015377	Top3beta; gbb; trio; dlg1; caz; Abp1; RhoGAP68F; simj; Arp3; cpb; Arfip; Pak3; RhoGAP92B; Synd; spas; Med; mnb; Ank2
GO:0072553	0.00110923	3.37326	9.49256	18	29	terminal button organization	0.0015377	Vap-33A; Fas2; CG9172; gig; Abp1; Atg1; Sod; Arp3; Thor; Tor; p38b; beag; Smu1; CASK; Nrx-1; spas; Nup75; TBPH
GO:1903829	0.00110923	3.37326	9.49256	18	29	positive regulation of cellular protein localization	0.0015377	CHOp24; Crag; Act57B; pav; Stim; fu; noi; CG7214; Cas; Fs(2)Ket; eca; Kap-alpha3; Rab11; Sar1; Diap2; Cam; Cul4; Sec16
GO:0008361	0.00113196	2.06523	25.5317	39	78	regulation of cell size	0.00156766	Rbf; AMPKalpha; MAPk-Ak2; Lst8; Pdk1; Rac1; RpL8; Girdin; CG14977; dsh; bif; lic; mbt; RhoGAPp190; gig; pbl; Thor; Rheb; Madm; Liprin-alpha; SCAR; Tor; p38b; Syx5; Lar; Ras85D; Tctp; foxo; Akt1; Pi3K92E; CHORD; p38a; hppy; icln; shot; stan; Pten; RhoGAP1A; Pi3K21B
GO:0007411	0.00113509	1.49884	83.4691	107	255	axon guidance	0.00157046	CkIIalpha; AMPKalpha; DAAM; Fas2; Ptp4E; mys; Nrg; Ppt1; Moe; ras; shg; Chi; betaTub60D; uzip; trio; Sac1; Rac1; alpha-Spec; msn; Src64B; dsh; Ptp10D; bif; mew; if; beta-Spec; Vav; Cdc42; fz2; Dab; Nrt; dlp; caps; Ptp69D; eIF-2beta; aay; dally; velo; LanA; Klp64D; Elp3; dock; spen; kis; Ten-m; Rheb; kra; chic; Tig; Liprin-alpha; Hrb27C; Glt; bsk; SCAR; Rab6; Tor; EndoGI; Fas3; Lar; sas; Mical; Se…
GO:0008038	0.00114705	1.82602	36.9883	53	113	neuron recognition	0.00158546	Fas2; wdp; gek; uzip; Sac1; Rac1; alpha-Spec; Con; dsh; pot; mew; if; beta-Spec; RhoGAPp190; trc; fz2; Nrt; Ptp69D; eIF-2beta; Nrx-IV; fry; Arp3; pbl; Npc2a; galectin; Ten-m; kra; mmy; Glt; SCAR; Arpc1; Gli; Fas3; Mtp; Hsc70-4; Sulf1; fray; tok; Tl; WASp; Ptp99A; Sema-2a; Rho1; shot; Galphaq; stan; PlexA; Lsp2; Fur1; Ten-a; dsd; axo; sli
GO:0008358	0.00116648	1.84935	35.3516	51	108	maternal determination of anterior/posterior axis, embryo	0.00161074	Moe; shg; mago; tud; Egfr; DCP1; Hsp83; Rop; lic; Chc; Lasp; blue; Rac2; l(2)gl; lost; chic; Hrb27C; Rbsn-5; Pka-C1; Ge-1; Rab6; BicD; vls; ik2; E2f2; eIF4AIII; lkb1; sqd; CSN5; mira; Rab11; lsn; Syx1A; btz; spn-F; stau; Khc; Dg; bic; Nacalpha; SmD3; psq; TER94; tsu; didum; csul; glo; mon2; msps; aPKC; gus
GO:0006998	0.00117709	9.26588	3.60063	9	11	nuclear envelope organization	0.00161593	Nup214; Nup93-1; Dd; Lam; pelo; Ote; LamC; p47; Nup154
GO:0030004	0.00117709	9.26588	3.60063	9	11	cellular monovalent inorganic cation homeostasis	0.00161593	Rbcn-3B; VhaAC39-1; Vha68-2; Vha68-1; Rab14; Nhe2; Vha55; Vha100-1; Rbcn-3A
GO:0030641	0.00117709	9.26588	3.60063	9	11	regulation of cellular pH	0.00161593	Rbcn-3B; VhaAC39-1; Vha68-2; Vha68-1; Rab14; Nhe2; Vha55; Vha100-1; Rbcn-3A
GO:0032008	0.00117709	9.26588	3.60063	9	11	positive regulation of TOR signaling	0.00161593	CG14812; CG14977; CG14184; NA; Prpk; Rheb; RagA-B; hppy; RagC-D
GO:0045196	0.00117709	9.26588	3.60063	9	11	establishment or maintenance of neuroblast polarity	0.00161593	zip; dlg1; par-6; Cdc42; l(2)gl; Sgt1; tws; lkb1; aPKC
GO:2001233	0.00117709	9.26588	3.60063	9	11	regulation of apoptotic signaling pathway	0.00161593	Egfr; Jafrac2; Dronc; Ras85D; Tango9; Drice; hpo; Tango7; Rab3-GEF
GO:0010769	0.00118733	2.19343	21.6038	34	66	regulation of cell morphogenesis involved in differentiation	0.00162836	DAAM; lva; Ppt1; GM130; babos; trio; Rac1; Rpd3; Dlic; dsh; bif; Rok; RhoGAPp190; Cdc42; trc; fry; pbl; Rac2; Elp3; Sec23; Liprin-alpha; Lar; gish; Rab11; Rab1; Sar1; spas; RhoGEF2; unc-104; Rho1; Lis-1; shot; stan; PlexA
GO:0051961	0.00118845	1.90429	32.0783	47	98	negative regulation of nervous system development	0.00162836	SkpA; sdk; sgg; Rae1; Rpd3; Src64B; bif; CG3560; gig; polo; MED11; brm; MED4; LanA; ed; l(2)gl; MED31; mts; CoIV; MAGE; MED6; tws; CG5214; CoVa; Akt1; mor; Patr-1; Rab11; spas; WASp; CG7834; Mob4; hpo; CalpA; ena; unc-104; scb; Galphao; Acsl; Mob2; osa; TBPH; Pten; MED10; nwk; raptor; Src42A
GO:0016334	0.00121131	3.504	8.8379	17	27	establishment or maintenance of polarity of follicular epithelium	0.00165548	csw; spoon; Egfr; Patj; dlg1; Cbl; l(2)gl; rin; sqd; sds22; crb; Dg; Dp; Parp; aPKC; kug; awd
GO:0016051	0.0012142	2.83558	12.4385	22	38	carbohydrate biosynthetic process	0.00165548	pgant6; GalNAc-T2; Pgm; CG10688; sgl; sfl; Tps1; pgant5; CG5171; CG5177; Rack1; Pgant35A; GlyS; botv; CG10924; Pepck; GalNAc-T1; AGBE; Pgi; pgant3; Inos; PhKgamma
GO:0031396	0.0012142	2.83558	12.4385	22	38	regulation of protein ubiquitination	0.00165548	CkIIalpha; Zw10; rb; Atg8a; Rabex-5; CG12084; ben; fu; car; mad2; Chro; Nedd8; alphaTub84B; alphaTub85E; Pli; Bub3; BubR1; Fem-1; Mtor; Fbl6; Mad1; Hrs
GO:0006098	0.00122698	Inf	1.96398	6	6	pentose-phosphate shunt	0.00165548	Pgd; Tal; CG17333; Zw; CG30499; Rpi
GO:0006189	0.00122698	Inf	1.96398	6	6	'de novo' IMP biosynthetic process	0.00165548	ade5; Prat2; ade2; ade3; Prat; Dhfr
GO:0006544	0.00122698	Inf	1.96398	6	6	glycine metabolic process	0.00165548	CG3011; CG7430; ppl; CG6415; CG3999; Dhfr
GO:0009081	0.00122698	Inf	1.96398	6	6	branched-chain amino acid metabolic process	0.00165548	CG17896; CG1673; CG6638; CG10399; CG2118; CG3267
GO:0015937	0.00122698	Inf	1.96398	6	6	coenzyme A biosynthetic process	0.00165548	Ppcdc; Ppat-Dpck; fbl; CG5828; Dpck; Ppcs
GO:0019079	0.00122698	Inf	1.96398	6	6	viral genome replication	0.00165548	CG14812; Cbp80; AGO2; Rack1; Cbp20; Ars2
GO:0030488	0.00122698	Inf	1.96398	6	6	tRNA methylation	0.00165548	Nsun2; CG32281; CG9596; CG14544; Mt2; CG15618
GO:0032785	0.00122698	Inf	1.96398	6	6	negative regulation of DNA-templated transcription, elongation	0.00165548	NELF-B; TH1; Nelf-E; Nelf-A; Spt5; spt4
[truncated: 371 more rows]
