# Supplementary material for: The developmental proteome of Drosophila melanogaster
Source: HighWire-hosted journal article supplement (doi:10.1101/gr.213694.116), 2017-04-05
Supplement: Supplemental_Tables.zip [file Supplemental_Table_S3.xlsx]

## Sheet: dynamicity
gene	gini	averageLFQ	maxLFQ
Nep3	0.476768	22.3169	24.189
CG9572	0.296364	27.0207	30.7048
CG9577	0.0490896	32.3556	33.6597
CG9578	0.203792	25.9269	28.1116
CG9581	0.0344209	28.953	29.7109
Rab35	0.212733	26.0251	27.9563
alpha-Cat	0.106322	27.8597	29.7532
CG32230	0.0541226	31.9612	34.0162
CkIIalpha	0.0211713	32.1242	32.7989
CG33217	0.240446	26.2612	29.7198
CG32350	0.572568	22.8699	26.1058
CG17450;CG32820;CG32819	0.477145	23.8794	29.0709
CG32500;CG33502;CG32857	0.0380073	28.517	29.2293
CG14476	0.0188194	32.9441	33.5601
G9a	0.415897	22.5205	23.716
cin	0.0462995	29.299	30.4155
CG3777	0.470417	25.9719	31.7357
CG12470	0.521853	22.2337	26.8179
y	0.519574	24.9488	30.7292
CG3156	0.515839	23.1802	26.1432
arg	0.242901	27.5789	30.1073
CG4293	0.470661	22.9935	25.8112
elav	0.144683	27.6755	30.1672
CG17896	0.0371809	32.355	33.4431
CG18273	0.494123	25.4122	30.7832
ebo	0.518687	23.5106	27.0413
Cyp4g1	0.285779	29.5809	36.0657
pcl	0.502882	22.2828	24.5337
CG3038	0.490471	22.8272	25.9727
Appl	0.435033	22.8168	24.4371
CG13369	0.0663324	27.3802	28.4116
CG17829	0.52563	22.293	25.7114
l(1)1Bi	0.30352	27.0158	31.6119
su(s)	0.568951	23.2423	26.6895
Roc1a	0.48425	23.6537	27.6119
SkpA	0.0365083	29.5841	30.304
sdk	0.272843	25.8388	29.894
CG5254	0.251508	27.3569	30.8367
tw	0.363176	22.2873	23.0474
CG16989	0.407039	24.7591	27.5076
Sec22	0.0349875	29.2469	29.9295
Rbf	0.422386	24.6581	27.5035
CG13360	0.486636	22.2791	24.388
RpL22	0.03214	33.5627	34.658
CG13362	0.515884	22.3297	25.4566
RpL36	0.034264	33.0343	34.0376
CG13365	0.387503	23.6974	25.7845
CG13366	0.46168	24.0119	27.9645
CG11663	0.233883	21.9691	23.3981
MED22	0.489112	22.9541	25.6486
TRAM	0.386543	24.0374	26.8359
CG3021	0.415828	22.1329	24.0011
CG14630	0.271193	27.2236	30.1187
su(w[a])	0.49344	22.7204	24.5746
CG14629	0.144673	30.4156	33.4212
CG3655	0.364225	24.4648	27.8781
CDC45L	0.6072	23.5261	28.3838
CG3690	0.477993	22.2698	24.5392
CG3699	0.170374	30.4484	33.4165
CG3704	0.161196	27.2803	29.1102
CG3706	0.363589	22.0565	24.3248
CG11378	0.273143	27.3562	31.3115
CG14626	0.538252	22.3334	26.8727
CG11380	0.583672	22.3525	28.5858
CG14625	0.63876	22.6392	29.8312
CG11381	0.628556	22.4697	29.7913
CG14624	0.413565	22.1012	24.9027
CG11382	0.603468	22.8629	28.1667
fs(1)N	0.637279	24.1289	30.1699
CG11412	0.341693	24.3952	26.4475
CG11417	0.460273	23.8288	26.7028
CG14770	0.697139	23.0614	32.7422
ssx	0.0938778	27.4836	28.8093
AMPKalpha	0.0800044	26.5462	27.379
CG11448	0.246596	23.1561	25.0816
CG14786	0.118373	28.5799	30.5578
CG3719	0.167231	26.6981	28.4085
png	0.609945	22.5157	27.6405
CG12773	0.409255	22.7944	24.4176
CG11418	0.348743	25.271	27.8844
CG11409	0.549757	22.3756	27.1246
DAAM	0.39362	23.4689	25.7467
CG11403	0.578169	22.5143	25.8283
CG11384	0.551912	22.4468	25.1261
CG14777	0.503376	22.5188	24.5685
pck	0.419221	22.8465	24.841
mei-38	0.58636	23.1033	27.3835
rush	0.235763	25.399	27.1677
inc	0.349261	24.4408	27.4731
br	0.281098	21.9948	23.8352
dor	0.358951	24.2753	26.5498
hfw	0.54329	22.5337	25.0605
b6	0.646116	23.0065	28.5063
Mur2B	0.600331	22.6234	29.1729
sta	0.0223847	34.7258	35.4098
O-fut2	0.451158	22.7194	24.8558
Ns3	0.161428	27.6147	29.7193
CG14787	0.472175	24.6074	29.1475
Adar	0.51369	22.4099	24.6712
MED18	0.412859	24.5494	28.0133
CG14803	0.568974	22.5989	25.5202
Vps26	0.207102	26.353	28.4914
CG14805	0.218227	25.9353	28.1733
CG14806	0.494766	23.1747	26.0578
mRpL16	0.212241	27.5514	29.8077
mip130	0.249579	25.0901	27.5223
Rbcn-3B	0.163145	27.4047	29.1322
Ocrl	0.369655	23.9221	25.9532
CG11596	0.358935	25.0235	29.58
CG3587	0.234524	24.747	26.3145
CG4194	0.624596	22.7737	27.9599
CG4061	0.452932	22.2449	23.9487
CG4045	0.0905706	27.7312	28.9076
CG4199	0.0406685	29.6906	30.4285
CG4281	0.495514	22.6796	24.79
Actn	0.419941	22.6504	24.7334
Actn	0.363533	25.7526	29.4522
usp	0.231751	24.6713	26.3185
CG4406	0.189382	26.7089	28.7417
CG3857	0.534998	22.8852	25.894
eIF2B-epsilon	0.189199	27.6664	29.7383
Edem1	0.409637	23.1742	25.3915
trr	0.47253	22.3117	24.334
CG14817	0.091747	28.6136	30.1486
Pgam5	0.087716	28.5249	30.0002
Pex5	0.274868	24.9783	26.702
CG14814	0.55088	22.539	26.1563
deltaCOP	0.0161433	30.7835	31.2507
CG14812	0.313635	24.8358	26.9381
Unc-76	0.137492	21.926	22.6653
csw	0.382047	24.056	27.1249
CG3835	0.151295	30.1401	32.9872
Pgd	0.0264519	32.613	33.6736
CG3630	0.522864	22.6279	24.9388
CG3621	0.0809955	30.0312	32.1593
Cyp4d2	0.411185	24.8391	28.5666
pn	0.0934722	27.069	28.2098
CG17776	0.279137	24.6235	26.5034
Mct1	0.401211	22.7552	24.3064
fs(1)K10	0.456505	22.4477	24.0886
CG3071	0.400718	25.6109	29.7584
phl	0.459451	22.6027	24.182
ptr	0.354563	24.6619	26.9273
mRpL14	0.0711127	28.0517	29.1425
CG2918	0.023046	32.3896	32.9925
CG2924	0.575977	23.5831	27.9566
temp	0.451725	22.4017	23.8823
CG3091	0.512987	23.8745	27.5608
CG3191	0.531907	23.4831	26.8636
crn	0.302259	26.4401	30.0783
kz	0.478987	24.2784	28.3344
Vinc	0.0363161	32.8767	33.8182
msta	0.414694	23.9742	26.1638
msta	0.574008	22.7049	26.1254
CG18031	0.444342	24.6116	28.0698
Nmd3	0.410667	25.8569	30.6042
Cyp4d14	0.408604	24.7011	28.3746
Cyp4d1	0.445319	24.9733	29.132
Cyp4d1	0.590702	22.6532	26.1993
wapl	0.571557	23.344	26.7297
bcn92	0.0531139	28.1208	28.9475
ph-p;ph-d	0.443804	22.3613	24.0505
CG16903	0.534114	23.038	26.2732
z	0.499062	22.2341	25.2266
CG13759	0.486141	23.9161	28.5793
wds	0.263632	26.424	29.4163
Zw10	0.283919	26.287	29.8942
Seipin	0.423821	22.5386	24.0148
Tsp3A	0.441232	22.1398	24.739
CG8636	0.03587	30.5787	31.4799
Klp3A	0.656811	24.0551	31.1815
boi	0.49449	22.9688	25.1614
tko	0.115319	27.4071	28.7152
sgg	0.296894	23.5554	26.6134
eIF2B-beta	0.0940397	27.9948	29.2436
CG2681	0.563395	23.6245	27.367
fs(1)Ya	0.376283	22.085	23.9927
w	0.470872	22.4903	25.4252
CG32795	0.296524	24.2115	26.3764
Syx4	0.410747	22.3301	23.4523
ttm50	0.0298147	29.6929	30.5936
CG2701	0.498736	23.6103	27.3822
CG2685	0.473658	23.0086	25.82
Csat	0.371038	22.1653	23.0431
CG2658	0.10556	27.3748	28.6383
CG2650	0.615843	24.1908	33.368
N	0.599643	23.2117	27.3753
CG3939	0.0389551	29.5115	30.5205
dnc	0.428745	22.423	24.6149
Fcp3C	0.529703	22.4474	25.0695
CG18508	0.211794	24.9144	26.5865
CG32793	0.615179	22.6541	26.9858
CG3598	0.626268	22.7043	27.7019
CG14421	0.680165	22.969	29.966
CG14422	0.623261	22.5264	28.373
CG14423	0.630855	22.8374	27.2951
CG3603	0.129436	27.9699	30.5714
rst	0.518003	22.3786	24.6473
CG14424	0.673166	23.1034	29.3282
CG14419	0.521032	23.5638	28.0726
CG10802	0.209654	26.5806	28.518
CG10803	0.49584	22.5016	24.5364
Rala	0.225117	23.8567	25.8794
Rala	0.193422	24.718	26.7844
CG2875	0.378713	25.498	29.2805
CG14270	0.275789	25.6117	27.9796
HIP-R;HIP	0.0347871	32.0475	33.0667
ec	0.490581	22.4414	24.687
CG2930	0.313129	25.7577	28.877
VhaAC39-1	0.0988931	30.1429	32.0002
CG15239	0.580995	23.9785	28.8678
CG2941	0.508846	22.3542	24.4644
Vap-33A	0.020128	32.4786	33.1326
CG6414	0.43627	25.4695	29.9534
CG6428	0.266891	24.4273	26.4222
lva	0.0719609	28.7091	30.6966
brn	0.535233	23.0657	25.9509
cib	0.217198	30.3211	33.6461
dgt4	0.609988	22.9963	27.2366
tyf	0.455144	23.9303	29.6837
GlcAT-I	0.0526091	26.9965	27.6353
CG15570	0.624269	22.8579	28.572
CG2982	0.130584	28.8612	31.9785
norpA	0.452267	22.2034	23.8199
CG3626	0.173704	26.5382	28.1671
mRpL33	0.134401	27.0922	28.7049
mei-9	0.550178	23.6155	27.7787
Femcoat	0.416727	23.2348	29.6043
Fas2	0.122819	28.7121	30.3239
Tip60	0.258549	21.9978	22.811
Nsun2	0.242166	28.012	31.7094
Xpac	0.497604	22.2047	25.9994
CG6379	0.487383	23.198	26.4724
CG3556	0.402052	23.0366	25.4984
CHOp24	0.0393037	30.9653	31.9745
CG15912	0.139705	25.0473	26.2421
CG3527	0.489389	24.5816	28.5942
CG3546	0.438947	22.343	23.8225
pon	0.487023	22.313	24.3833
mRpL30	0.0630576	28.2707	30.0023
Cbp80	0.223594	27.9433	31.3617
rap	0.515641	22.654	25.4525
Torsin	0.0490643	29.5467	30.9579
CG11444	0.151176	26.2351	28.1494
CG11436	0.41315	24.0554	26.6113
rb	0.300102	25.9577	29.1592
ctp	0.121733	28.6631	30.2249
l(1)G0334	0.0481231	32.8913	34.6923
CG7024	0.568152	22.3221	27.7335
CG6927	0.501941	22.2161	25.8416
CG6903	0.405227	22.3334	23.3158
Ptp4E	0.276272	22.9096	23.9906
snf	0.0481056	29.0402	29.8798
dhd	0.713544	23.2211	33.4785
Sas10	0.466278	24.8052	28.7846
Rnp4F	0.162936	26.769	28.4111
TrxT	0.579454	23.5621	28.7443
Cdk7	0.500348	24.8642	29.9953
Mcm3	0.279177	28.3333	32.8799
XRCC1	0.402684	23.7782	26.6098
CanB	0.415982	22.16	23.5729
CG4165	0.226452	25.8313	27.9474
CG16756	0.449699	22.7839	25.8648
CG15784	0.412486	24.1818	27.0789
CG4151	0.653224	25.6555	35.1373
l(1)G0045	0.529022	23.4045	26.7474
RhoGAP5A	0.494176	23.5261	26.7004
CG32762	0.662838	25.2046	34.0368
spoon	0.279656	26.2025	29.3965
NAAT1	0.495842	22.3917	24.6643
CG3309	0.586286	22.6045	25.7945
CG4119	0.268214	25.8454	28.6827
RpL35	0.0386832	32.7651	33.8214
cv	0.382552	22.2896	23.3208
CG4078	0.452395	23.1275	25.9382
CG15772	0.548533	22.4464	25.2994
Cpr5C	0.615357	22.6887	26.8375
CG16721	0.0902286	27.2614	28.6144
Act5C	0.170016	28.4849	31.0277
CG4020	0.347009	25.4966	28.839
CG3011	0.0270084	33.682	34.6149
CG3016	0.261569	23.9318	26.0086
mof	0.52508	22.7894	25.376
GAA1	0.307325	26.0377	29.1649
CG15766	0.379783	23.857	27.0258
CG3108	0.438055	26.7484	32.9142
CG3097	0.388037	25.4901	29.4848
MAPk-Ak2	0.119996	27.3729	28.7833
lin-52	0.47897	22.6356	24.6032
IntS6	0.426681	24.2117	27.1301
CG32758	0.277547	24.32	25.9096
CG33080	0.488169	22.3798	24.9973
CG3160	0.407824	23.3825	26.1775
Tre1	0.44371	22.2269	23.6134
Rab18	0.0246771	28.1513	29.1037
Sirt4	0.482325	22.7868	25.4327
CG6067	0.41491	23.1973	26.2448
CG5966	0.504588	22.8083	25.7773
CG5941	0.0352032	30.202	31.2576
CG5928	0.595681	22.8547	27.5406
Nep1	0.458799	22.3417	24.4123
sqh	0.0829506	29.6356	31.1249
Btd	0.619862	22.9882	27.1375
vanin-like	0.561119	24.3472	29.6126
CG32750	0.51984	23.1877	26.4145
Mipp2	0.198529	25.3799	26.8203
CG4666	0.302678	25.9792	29.7852
Tsp5D	0.616921	22.9639	26.7099
mab-21	0.518409	22.5421	25.0579
fs(1)M3	0.57983	24.1061	29.6622
CG14445	0.360256	26.043	29.4317
Spx	0.447771	23.0524	25.0924
CG3781	0.344367	22.722	23.8725
Spt6	0.217729	27.143	30.5484
wuho	0.0335456	28.9013	29.5272
CG15896	0.329642	24.7169	26.8983
CG3815	0.532691	23.9551	28.5234
CG3823	0.488922	22.5441	25.348
CG3842	0.0483799	28.6605	29.3587
CG3847	0.303078	25.6619	28.6223
kdn	0.0592669	34.877	36.8876
Marf	0.240058	27.1668	29.5953
Spat	0.255379	28.5506	31.432
dx	0.468091	22.4405	24.0391
RpL7A	0.0258136	34.4451	35.4464
CG3342	0.240394	21.9827	22.7064
PpV	0.156854	27.6765	29.8431
swa	0.565663	22.3354	27.3599
CG3446	0.0594911	31.4019	33.5234
CG15892	0.442187	22.1191	25.9488
Top3beta	0.355905	25.606	29.1251
schlank	0.199671	25.4564	27.0188
APC7	0.624909	22.5194	27.9117
Mcm6	0.390347	26.9085	32.026
l(1)G0255	0.0368483	33.388	34.6331
CG4095	0.651632	23.2086	29.8006
Pink1	0.420346	22.3286	23.8368
CG14439	0.45544	22.5152	24.3484
CG14438	0.26653	25.1911	28.8479
COQ7	0.102922	26.572	28.1423
xit	0.462828	22.2551	24.5261
nonC	0.431868	24.1248	26.9191
shf	0.35159	22.1383	23.2716
RpL17	0.0281823	33.7383	34.7407
CG3168	0.477116	22.3663	24.0303
CG14442	0.295056	22.0132	23.1658
CG3184	0.473905	22.9181	25.0585
CG3192	0.0546411	31.0097	32.8345
CG3198	0.258478	24.6343	26.4264
CG3224	0.540289	23.7041	27.3981
CG3226	0.061969	30.4285	32.1814
CG4586	0.160227	28.4133	31.6248
bou	0.326596	23.3332	26.4605
Inx2	0.15755	28.2324	30.2991
CG32736	0.461616	22.3277	24.2863
CG4593	0.0621752	28.974	29.8492
CG8300	0.558178	23.2201	27.0183
cm	0.217838	26.1604	28.7894
Inx7	0.567915	23.4582	27.4466
ogre	0.350102	25.3979	28.317
CG3040	0.0537537	28.0791	28.929
CG32732	0.210722	27.0029	29.4099
CG14434	0.0875917	29.0556	30.6918
Cht11	0.566079	23.0826	26.2574
CG14435	0.532609	22.6479	26.0405
CG2059	0.0992776	27.5433	28.9886
CG18155	0.330735	22.0341	23.7996
CBP	0.186795	28.9192	32.379
CheA7a	0.443989	22.17	24.2418
CG15034	0.479653	22.2549	24.5685
Atg5	0.131045	25.4844	26.6274
unc-119	0.411798	22.5322	23.8168
ct	0.454977	22.3195	24.3867
Hira	0.591441	23.1205	26.7926
Rab39	0.0868086	27.2225	28.8439
Tom40	0.0687297	30.1715	31.3748
Pdp	0.0291323	27.9757	28.4796
NELF-B	0.26987	25.1379	27.9826
CHES-1-like	0.461231	22.2445	23.9381
p115	0.0876641	27.0423	28.0235
bys	0.173907	27.8987	31.0936
CG1444	0.0976297	29.4084	31.984
snz	0.410402	22.2135	23.4938
Ykt6	0.0912794	28.8162	30.3075
RpS14b;RpS14a	0.0205275	33.4811	34.2099
sn	0.0941836	29.3996	30.9758
mys	0.0863238	30.067	31.5487
Gclc	0.270547	28.0288	32.3568
CG2258	0.367128	25.2616	28.148
UbcE2H	0.0647662	29.0407	30.3952
CG2254	0.221822	28.961	32.137
Upf2	0.271168	25.3434	28.1569
fs(1)h	0.361936	24.8505	28.0341
CG2233	0.190582	29.8641	33.2244
sws	0.336146	24.2781	26.7185
l(1)G0193	0.445639	22.2401	23.7591
l(1)G0193	0.301281	22.1349	22.6633
CG10778	0.470565	24.22	27.1617
CG10777	0.0295198	30.3402	31.2319
RpS6	0.0270615	33.4526	34.4486
CG18624	0.100745	29.401	31.5923
CG10932	0.0114612	31.9224	32.2698
dec-1	0.665284	23.5582	33.0721
CG10920	0.287644	21.9987	23.9008
CG1575	0.318684	25.724	29.1667
CG2147	0.462536	23.5326	26.5157
Trxr-1	0.0416719	33.4607	34.5963
CG1632	0.446533	22.5738	24.0487
CG10555	0.385295	22.286	23.2264
CG11190	0.305418	26.088	29.6852
CG15343	0.402814	25.8854	29.5231
ND75	0.039209	33.2011	34.8574
sni	0.0327374	29.2108	30.1218
slpr	0.439222	22.5235	24.3367
Gbeta5	0.503234	23.2479	25.8126
CG2263	0.0282473	31.2557	32.0462
CG17982	0.419962	23.3256	25.1221
Smox	0.507902	22.9586	25.4309
CG2260	0.525902	24.3586	28.8276
CG1440	0.0331332	31.6464	32.6984
Es2	0.427331	22.1535	24.0005
Cp7Fb	0.634294	22.7649	28.8371
Cp7Fc	0.345064	22.0361	24.5377
Cp36	0.55914	23.8792	33.9109
Cp38	0.630449	23.3873	33.9496
Nrg	0.132718	30.8894	32.7308
Trf4-1	0.473369	22.9077	25.5478
CG12065	0.460529	23.1936	26.0615
CG12081	0.462491	22.2402	24.0009
Crag	0.0499145	27.6694	28.8122
CG11284	0.0659532	27.0134	27.9797
Ppt1	0.0631074	28.5608	29.5619
Caf1-180	0.613786	23.5119	28.4516
spirit	0.463317	23.9259	27.5167
CG12111	0.643802	22.7488	27.7723
IntS4	0.529588	23.438	26.5866
PIP82	0.422035	22.1616	23.6634
CG33223;CG32713	0.236612	21.9745	23.0794
Sptr	0.0481854	29.3651	30.5888
CG15347	0.17478	29.4055	32.3821
CG12123	0.467494	24.3259	27.7022
CG12125	0.175818	25.2796	26.4138
Hexo2	0.130905	28.1102	30.6467
CG1785	0.417087	24.7156	27.9184
Rbm13	0.416631	25.5481	29.6882
CG10962	0.380272	25.6621	29.4663
e(r)	0.047628	28.0639	28.6985
CG1885	0.227812	27.5696	31.9027
Moe	0.0129305	33.2504	33.9693
l(1)G0020	0.450566	25.7103	30.562
CG2004	0.0683217	29.9378	31.2464
HP1b	0.268475	25.8428	28.0992
APC4	0.595763	23.0635	26.662
CG32708	0.412935	24.2504	26.9178
CG7033	0.0375517	33.4361	34.9378
Arfrp1	0.0759968	25.5596	26.3393
AP-1gamma	0.275342	23.0992	24.4085
CG7065	0.362074	24.1594	26.7538
dalao	0.33084	25.572	28.4927
Dip1	0.426036	22.7133	24.3312
mei-P26	0.436833	22.2232	23.7512
CG12057	0.177244	21.9472	22.5051
CG12056	0.0552571	26.6521	27.2332
CG12106	0.241697	24.9718	27.0825
CG15369	0.27943	28.7769	32.6181
Dsor1	0.111527	27.5322	29.1188
CG17754	0.378831	22.5142	24.1251
ric8a	0.232273	26.2571	29.1876
CG16892	0.353383	25.9818	30.4894
c12.2	0.0863195	28.4437	30.3485
c12.1	0.420102	23.1668	26.4865
c11.1	0.0598205	28.9276	29.9586
Cfp1	0.52844	22.4042	24.733
mxc	0.548032	22.7138	25.5641
CG12121	0.385273	22.942	25.0079
t	0.24722	28.1538	31.5539
CG12119	0.306823	27.4551	30.6315
su(r)	0.196262	29.1609	32.3624
CG12115	0.465508	22.2057	24.6215
Zpr1	0.0663225	28.6157	29.4618
CG9034	0.22738	27.959	31.4793
Ost48	0.0625064	30.3454	31.8639
His3.3B;His3.3A	0.416443	25.0726	30.3209
fh	0.120843	26.8391	28.241
Bx42	0.299617	25.4848	28.0427
CG7766	0.584263	23.3815	27.8635
CG7246	0.424685	25.5056	29.5852
BCL7-like	0.39833	24.2496	27.7646
RpS28b	0.0165504	33.4343	33.8983
Hex-A	0.055271	31.3966	32.9569
Gga	0.183755	26.6262	28.3448
Aats-lys	0.260074	25.103	27.8875
Lst8	0.153393	25.7199	27.1463
l(1)G0320	0.0523568	30.5693	31.8177
CG32698	0.597737	23.1671	26.7594
Ser7	0.451165	22.8212	25.6334
CG1468	0.53816	23.792	27.8657
CG9686	0.505337	24.1534	28.622
CG9689	0.624443	23.6036	29.1609
CG9691	0.37214	26.5932	30.3597
Idgf4	0.0617873	33.4152	35.129
nej	0.539458	23.3761	26.6204
CG3106	0.556668	24.6572	30.2996
l(1)G0232	0.176928	26.4995	28.882
CG1889	0.558248	22.5132	25.9467
CG32694	0.633821	24.0797	29.8774
CG32694	0.172611	27.4006	29.7961
CG2990	0.619828	23.7985	29.6409
Yp1	0.182763	32.4272	39.0357
Yp2	0.177158	31.9926	37.7263
CG2972	0.326978	25.3175	28.5449
l(1)G0230	0.0485796	33.0689	34.9431
CG34408	0.407856	23.7292	26.1614
CG17841	0.319156	22.0549	22.9611
flw	0.034476	28.1651	28.8477
Neb-cGP	0.0527272	29.4246	30.7425
PPP4R2r	0.108729	29.1538	31.0889
nocte	0.296684	27.2587	30.3692
Psf3	0.530195	24.0666	28.609
CG32679	0.614908	23.0317	26.8562
l(1)G0289	0.0733343	28.1052	29.376
Gip	0.0231731	32.3669	33.4056
CG12643	0.591452	23.3492	27.5291
Ipod	0.492817	22.2967	24.7843
CG2962	0.611932	23.6642	29.5284
CG15309	0.488646	22.259	24.9189
ZAP3	0.570311	22.7312	25.9502
CG2124	0.383009	24.3301	26.753
ras	0.0377966	30.1319	31.2496
Atg8a	0.0718742	29.0174	30.456
Tango5	0.285758	25.6791	27.8852
CG1628	0.572079	23.5435	27.2353
Hmr	0.482106	23.5998	26.9321
Ipk1	0.500208	22.3047	24.4461
Act57B	0.182725	32.0053	34.9755
CG9344	0.0544506	29.0725	30.1766
Prosalpha3	0.0283554	32.628	33.5477
CG10543	0.395709	22.398	23.7715
CG9346	0.432025	24.0575	26.8704
RIC-3	0.601701	22.6954	26.3587
CG9350	0.225865	27.2355	30.9637
cpa	0.0344221	29.9857	30.9456
mRpL54	0.225136	25.3421	27.8769
Cht8	0.666167	24.3462	32.1275
Treh	0.191566	29.4749	32.3573
CG10527	0.0485462	33.2001	34.4531
Cht9	0.608695	22.7068	27.1335
Cht4	0.517988	22.5212	25.7511
CG15653	0.44509	22.2539	23.8735
shg	0.165641	28.7454	31.2947
CG3295	0.304614	25.3235	28.5205
CG30291	0.0370765	29.725	30.7099
CG15650	0.542108	22.3493	25.679
CG15649	0.449554	22.2496	24.057
CG9993	0.478928	24.8414	29.1041
sktl	0.342653	23.8039	25.802
CG9394	0.384699	25.8571	30.2239
mago	0.135309	28.2505	30.2176
Hmg-2	0.559854	22.8682	25.9582
Xpd	0.564897	23.7384	27.5054
Pu	0.236265	21.9703	23.4188
RpL29	0.0364943	31.9485	32.6597
CG9485	0.386699	22.0771	24.5186
Acox57D-p	0.140139	26.6572	28.2142
Acox57D-d	0.320089	25.527	28.8939
CG17974	0.557996	22.4519	26.1266
CG9822	0.613679	22.6489	28.8201
CG9754	0.591455	22.6144	26.3243
CG9752	0.15729	28.4898	30.7961
Sgf29	0.362385	24.3351	27.2559
CG30392	0.0514226	27.0864	27.8063
CG10505	0.465616	22.5117	24.0081
CG15661	0.406995	22.3623	23.6202
CG4302	0.265268	27.8587	31.4411
CG4286	0.33612	22.0335	24.1749
LSm1	0.0318846	28.5995	29.1993
CG4266	0.195142	25.8688	28.1808
CG30389	0.355935	22.0725	23.5588
Magi	0.464907	22.4996	24.7437
CG4050	0.367764	22.7727	24.137
CG4038	0.0629317	30.8144	32.3494
Rbpn-5	0.338093	23.2341	25.6441
Sara	0.26793	23.7492	25.4071
Egfr	0.318996	24.5303	26.9768
mahj	0.429784	25.7752	29.5174
CG15674	0.653377	24.0632	31.8728
CG10082	0.435794	22.1747	23.9612
CG10320	0.0472274	30.8285	32.5321
NC2alpha	0.228022	24.4065	26.1639
CG10306	0.028333	31.8712	32.5081
Ppcdc	0.318562	24.6909	26.7141
HmgZ	0.0622103	29.2093	30.245
Tim10	0.166381	26.2493	28.2616
Tbp	0.529655	22.5834	25.1845
Rae1	0.0596661	29.1581	30.392
clt	0.110229	26.8784	28.1343
CG18870	0.478472	22.2809	24.9545
CG10433	0.408191	23.6149	26.2755
TAF1C-like	0.340064	22.101	22.8989
Fkbp14	0.182646	27.6443	30.6969
Sdc	0.558459	24.1368	28.6184
HmgD	0.0754996	29.5525	30.942
LBR	0.302707	25.3662	29.6682
Grx-1	0.46775	22.1978	24.4513
CG4021	0.535479	23.3483	26.5464
CG4377	0.5416	22.2794	27.1508
CG4363	0.656828	23.1938	29.8883
CG4386	0.630937	23.451	29.4237
CG18735	0.676009	24.3613	32.77
lox2	0.481768	22.2598	24.8981
Tango11	0.0642196	27.7364	28.7863
Synj	0.25464	25.8918	28.1938
CG6613	0.423588	24.3901	28.8195
CG30281	0.398493	22.1022	23.7749
mei-S332	0.401862	22.1137	24.099
NtR	0.426923	22.1738	24.0878
gom	0.558749	22.3736	25.7891
CG6758	0.590277	22.6557	26.3037
MED16	0.569752	22.5802	26.1412
Vps35	0.0922922	29.3486	30.8573
ari-2	0.520425	22.6688	24.8076
dve	0.374017	22.0789	23.8607
Oatp58Dc	0.490847	22.7895	25.0298
CG3264	0.544312	22.5094	25.8926
CG3290	0.65813	22.7337	28.5348
CG3292	0.568029	23.6453	27.919
Swim	0.247659	29.1208	32.391
CG3045	0.555827	22.9442	26.2767
GM130	0.248159	26.3187	29.2499
Vrp1	0.493659	22.3078	24.5277
CG11073	0.525647	24.5434	28.8326
CG2921	0.141359	25.5005	26.6666
CG11474	0.046858	29.4886	30.47
CG13501	0.437677	22.3538	23.7148
CG5819	0.466018	22.9788	25.8211
Gp150	0.091762	27.5416	28.7156
Rtf1	0.53952	23.0367	25.9006
wrapper	0.475627	22.2962	24.9919
CG13506	0.191425	27.8933	30.207
Mes4	0.522798	22.3576	24.9597
qkr58E-2	0.0803925	28.7974	30.7953
CG4752	0.0296631	30.6536	31.5009
CG4554	0.306154	26.8667	31.1843
CG4610	0.493877	23.7962	26.5496
CG6018	0.405362	24.1096	26.4737
px	0.470491	22.8934	26.1937
mRpS29	0.0360336	30.2531	31.1581
qkr58E-1	0.0941897	28.9097	30.731
babos	0.107796	28.7946	30.7849
T3dh	0.227887	28.267	30.8124
wdp	0.241858	27.2944	30.1105
CG4269	0.307971	22.0111	24.1131
RpS16	0.0420806	33.9358	35.236
Vps20	0.326158	24.1445	26.4485
bonsai	0.04344	29.4125	30.4987
nsr	0.54425	22.4128	25.5488
CG13510	0.552138	22.8841	26.7129
CG4250	0.386678	22.1137	23.8424
blw	0.0254152	36.1864	37.6917
RpL23	0.0250551	33.5383	34.4336
asrij	0.032512	28.8443	29.6416
MED23	0.438225	24.9221	29.4571
CG3700	0.576192	23.1498	26.6373
Gmer	0.0351563	28.5908	29.1376
CG3499	0.0204824	29.3692	29.8009
CG3501	0.0430857	29.5036	30.6881
inaD	0.583247	24.0465	29.5414
CG13531	0.572782	22.6988	25.8764
CycB	0.562673	23.8638	29.5558
robo	0.332995	22.0385	23.6243
Ppa	0.420929	22.1304	24.331
CG30196	0.458942	22.4575	24.3636
Cyp6d2	0.511248	23.9468	27.6689
CG2852	0.0334699	34.0051	35.107
Ugt58Fa	0.292165	25.7096	28.3651
RpS24	0.0237196	33.238	34.1556
Cdk9	0.342179	24.7872	27.5898
nahoda	0.56976	23.4186	27.6048
CG9849	0.484225	22.838	25.199
twi	0.40794	22.0889	25.2445
l(2)k09913	0.0420478	29.8103	30.7534
CG3085	0.590461	22.5717	26.9624
Klp59D	0.547262	22.7285	26.5419
Fib	0.0424018	32.1777	33.4804
CG9890	0.401658	24.403	27.0664
l(2)06496	0.20655	26.633	28.257
CG9896	0.553229	22.6565	25.5669
CG9897	0.643209	22.5479	30.7243
CG32833	0.502271	22.1889	27.1344
CG3800	0.0480674	31.4882	32.8921
CG3788	0.642017	22.7904	27.4692
Nup214	0.19448	27.0318	29.7436
CG9875	0.522505	22.3522	25.4697
yellow-d	0.395401	25.0524	28.941
yellow-d2	0.518527	25.1619	30.3924
eIF2B-delta	0.197892	27.0958	29.3954
CG9812	0.482493	22.4316	24.8711
CG3520	0.405631	25.5523	29.7755
CG3530	0.472031	24.1242	27.5556
CG30415	0.0621801	32.1061	34.3084
CG13551	0.0794304	31.0884	32.506
Golgin245	0.191476	26.7918	29.8685
vir	0.37618	24.8515	28.2766
CG3500	0.193638	23.5401	24.3248
CG30413	0.381194	22.0636	25.0055
CG30412	0.457923	22.2601	23.7735
RpL22-like	0.492433	23.4561	27.0712
mi	0.450748	22.2252	24.41
CG30185	0.0483649	29.5328	30.4421
levy	0.0388675	32.5556	34.0093
Dcp-1	0.308257	26.0536	29.8582
Pi3K59F	0.403681	22.791	24.1361
apt	0.621873	23.2723	27.8498
retn	0.642194	23.0496	28.8944
mRpL43	0.051804	29.6425	30.5361
l(2)dtl	0.47035	22.4455	23.843
Sesn	0.29161	25.5543	27.9166
CG5532	0.242425	25.5479	27.8465
l(2)not	0.502059	22.8337	25.0624
CG4091	0.415893	23.9293	26.2916
l(2)efl	0.248262	31.0772	35.2965
CG4019	0.407974	25.4791	29.142
Rrp4	0.131282	27.1767	28.8461
pita	0.441895	24.7478	28.482
wmd	0.108301	28.7064	30.3836
RabX1	0.402017	22.2123	23.8423
CG3906	0.473019	22.2251	24.4524
CG5543	0.514615	23.9135	27.4847
CG5554	0.0302175	31.3136	32.0901
gbb	0.301693	26.3282	29.9065
CG5569	0.118901	26.7311	27.8057
TM4SF	0.642061	23.2601	28.4379
CG5597	0.274316	28.767	32.1913
DNA-ligI	0.558132	25.0344	31.054
Lpt	0.448517	22.8659	25.2907
CG2812	0.50117	22.3136	24.6104
Tal	0.0243602	32.6943	33.6557
Galphas	0.0891969	28.5952	29.682
CG2970	0.0297198	30.0127	30.9184
thoc5	0.395649	25.4331	29.3273
Fmo-1	0.361839	24.2091	26.7932
Alas	0.306853	26.8653	30.7169
or	0.426658	24.1995	27.4429
mr	0.591224	23.492	27.674
Sox14	0.543021	22.45	25.5664
CG3121	0.538218	22.2765	26.53
Adk2	0.0208292	32.5688	33.2768
PebIII	0.206326	29.3866	33.2804
CG3163	0.240678	24.5986	26.9652
MAN1	0.451978	23.9154	26.6846
IntS1	0.496972	24.5702	28.7103
eIF-5A	0.0224516	33.1992	33.811
RpL12	0.0162893	32.5804	32.9742
Rap2l	0.158607	26.272	27.729
CG3209	0.3885	25.3873	28.6298
RpL39	0.397517	25.9702	31.9492
gammaSnap1	0.0483754	28.0936	28.8652
tsr	0.0132897	34.4641	34.8725
Not11	0.435298	24.1969	27.0874
Chi	0.241552	25.5375	27.7564
CG30172	0.41327	23.5974	26.1635
HSPC300	0.125894	25.5757	26.7113
CG3860	0.232333	25.7822	27.4759
Phm	0.143081	27.5975	29.5958
CG16787	0.431403	23.7253	27.2576
CG3803	0.3582	23.1689	25.4135
CG13565	0.502681	22.3976	25.4295
CG3735	0.599781	23.5366	27.7721
Ca-P60A	0.432643	22.401	23.5196
Ca-P60A	0.651646	24.7743	33.1393
Nap1	0.0506064	32.4275	34.077
CG5339	0.483091	24.2935	28.0804
Upf3	0.360361	23.0365	25.3156
DCP1	0.1106	28.5201	30.3764
CG4882	0.0395422	29.5225	30.9592
Thiolase	0.0115699	33.2657	33.7103
CG4585	0.412691	23.9047	26.2345
Pym	0.54839	23.4222	27.1891
ytr	0.405856	22.8222	24.2497
eIF6	0.0757802	28.967	30.4995
Snap29	0.34466	24.775	27.1986
shu	0.610833	22.812	27.1857
Nxt1	0.324751	23.4237	25.4984
Ssrp	0.348047	26.6727	31.0158
snama	0.311643	23.1038	24.599
enok	0.490045	22.6007	25.1737
Zfrp8	0.311315	24.6285	26.8185
Dat	0.220761	27.9808	30.4332
spag	0.176621	27.4793	30.0965
CG3328	0.398271	22.1934	23.4027
Nop60B	0.11583	29.882	32.4358
cN-IIIB	0.0243311	28.4926	29.2345
CG3356	0.314413	26.233	29.0046
CG3376	0.295528	24.9586	27.2975
CG3394	0.323205	25.3174	28.2885
betaTub60D	0.271147	23.1995	24.4193
bs	0.359718	22.1467	23.0697
mRpS17	0.0499006	29.399	30.4501
CG4065	0.234989	26.0072	28.1809
tamo	0.324705	22.038	23.5823
CG4049	0.424913	22.4044	23.804
gek	0.327309	24.8017	27.5198
Rpn8	0.0347988	32.5856	33.6435
CG3483	0.598183	22.4353	27.1366
CG3494	0.303405	22.0305	22.9838
CG16837	0.220875	21.9682	22.797
CG11414	0.0964211	27.7671	29.4263
uri	0.446283	23.6226	26.6433
CG3511	0.385655	25.8718	29.8472
pio	0.538792	23.2329	26.8104
CG3548	0.511281	24.4381	29.5593
CG3570	0.491251	22.6501	24.5387
CG3608	0.459163	24.2046	26.8973
Cyp9c1	0.494413	23.3889	26.8429
CG3640	0.500246	22.1862	27.0892
CG3663	0.0263386	29.8257	30.6289
NDUFA8	0.0449442	31.6193	33.453
Pof	0.515314	22.5615	26.6505
CG4806	0.515419	24.5411	29.3372
Cpr60D	0.54209	25.646	31.9282
CG4781	0.557449	23.7446	27.8544
CG4692	0.0438436	32.8519	34.7249
Fcp1	0.431257	24.1687	27.262
Nurf-38	0.274428	22.6149	23.6243
CG4622	0.40164	23.7956	26.5835
CG4612	0.0817383	28.2665	29.3684
Letm1	0.0204083	29.8302	30.2611
Prosalpha4T2	0.486951	22.3853	24.6337
Ssl	0.427373	22.6136	24.3652
CG4563	0.579309	24.9053	31.7176
slik	0.0893389	28.1614	29.146
CG30421	0.392321	22.9767	24.9703
spz6	0.564702	23.938	29.014
CG3589	0.297304	22.908	24.4161
CG3760	0.463935	23.1972	26.7165
CG3776	0.0677503	27.4206	28.3785
CG3829	0.415186	23.8794	27.1025
uzip	0.164855	27.9997	29.9703
emp	0.257265	27.3714	31.0397
CG2736	0.273169	26.952	29.7702
Phk-3	0.457979	25.674	30.2379
RpL19	0.0283063	33.714	34.6388
CG2790	0.488241	22.6399	24.8296
Tina-1	0.0360034	31.0041	32.1419
CG2811	0.110468	26.7386	28.0832
CG30427	0.645763	22.8721	28.4467
CG30427	0.604671	23.3946	27.9305
pain	0.349939	25.4033	28.6537
Ance-5	0.520284	23.569	27.1402
CG16896	0.525983	22.523	24.6998
Orc4	0.634644	23.6695	29.0832
Reg-5	0.472174	23.8823	26.8562
Aats-tyr-m	0.0470857	28.6092	29.2367
Lcp9	0.5347	26.0817	33.2263
Eps-15	0.0329813	28.9922	29.7845
GstE12	0.0325594	33.3696	34.1045
CG12848	0.173831	26.0669	27.9976
Peb	0.602581	24.1006	34.9962
PebII	0.672349	23.5725	34.0787
Lsp1gamma	0.360029	30.8603	38.127
Pdk1	0.397897	23.9772	26.8038
p130CAS	0.198787	21.9552	22.8325
Mtch	0.0614224	30.1343	31.4551
mri	0.168073	25.4651	26.9416
NitFhit	0.201589	26.7595	28.5963
CG16940	0.25266	26.7034	29.6724
mthl14	0.367509	22.4644	23.9044
mRpL17	0.0792634	29.4313	30.7342
miple2	0.491023	24.7244	29.1587
fwd	0.415102	23.0894	25.3107
Tudor-SN	0.0236844	34.317	35.0317
DIP2	0.465576	23.8827	27.1156
E(bx)	0.399071	25.4761	30.0536
thoc7	0.497193	24.2591	28.1086
CG7028	0.469536	23.9446	26.8928
Gyk	0.223173	26.94	30.0594
Vdup1	0.441289	24.1928	27.9206
CG7049	0.228923	25.8809	27.899
hipk	0.448605	22.2548	23.8416
Ppm1	0.627818	23.0906	28.3074
MED14	0.52052	23.9714	27.9785
Gale	0.0747086	31.131	32.5599
MED30	0.34649	24.9754	28.2755
CG3402	0.174836	25.8167	27.4785
Reg-2	0.32471	27.8995	32.1065
CG13893	0.392715	24.8065	29.014
Cypl	0.0659253	27.9429	28.8779
klar	0.367902	22.1506	23.3881
Cdc5	0.150574	28.1776	30.3018
CG32344	0.462338	25.2531	30.3116
RabX6	0.425881	22.5085	23.8899
CG13887	0.0989996	28.766	30.2982
CG13890	0.0893057	27.4822	28.9289
CG32479	0.108412	28.1937	30.0952
CG13907	0.422155	23.934	27.3706
CG13901	0.199314	25.9882	27.8923
CG13900	0.248921	27.6576	31.1019
hng3	0.400968	25.0223	29.1107
Vti1	0.456992	22.6227	24.8981
CG32483	0.491377	25.2878	30.4908
CG3344	0.286486	26.9613	30.0776
CG9205	0.276343	24.4539	26.3083
LysB;LysD;LysE;LysC	0.527358	24.2147	29.9203
LysS	0.630617	23.1653	27.5132
LysP	0.525593	22.3587	24.9201
CG9119	0.160591	30.5625	33.1592
LysX	0.608878	23.4213	27.9054
Trh	0.522941	22.3901	26.8897
bab2	0.501829	22.8921	25.8675
trio	0.437616	24.0877	27.5983
Sac1	0.253251	27.2409	29.8822
CG9129	0.554551	22.3209	27.1195
CG9130	0.655016	22.7388	29.0233
CG9134	0.415885	24.4307	27.6869
Rabex-5	0.230429	24.3367	25.9051
CG9149	0.0192971	30.9694	31.5342
CG2469	0.428642	25.0307	28.5472
CG9153	0.208001	26.3056	28.6566
Myo61F	0.322916	28.7467	34.0981
mtacp1	0.207495	27.2861	30.1182
msd1	0.625392	23.3529	28.1143
l(3)02640	0.161384	26.8505	28.953
312	0.324818	24.851	27.1191
CG9168	0.402915	22.082	25.3169
robl62A	0.407142	22.1092	23.9643
Psa	0.0343026	32.1461	32.9135
CG12090	0.578614	22.7312	26.0761
cue	0.41496	24.1212	28.3164
pUf68	0.0764459	29.0658	30.9276
CG12084	0.364277	24.3535	27.0666
Ptp61F	0.384935	25.5836	29.5006
CG2199	0.349304	25.2242	28.8001
CG2211	0.434214	22.2507	23.6052
msd5	0.643634	22.9049	28.3489
CG9184	0.621926	22.7018	29.6156
CG9186	0.0260141	29.7538	30.2871
CG2277	0.042842	29.0802	29.9587
Rac1	0.0342925	29.3374	30.1426
Psf1	0.333641	25.071	28.2492
Klp61F	0.592462	24.0857	30.3166
CG7852	0.318502	22.0341	23.3578
Cct1	0.418521	24.5542	27.3725
CG12003	0.609911	22.3845	30.1045
ABCB7	0.267961	26.6398	29.1433
CG33230	0.449662	22.4333	24.2483
CG7970	0.339832	25.072	27.5398
CG12011	0.679293	23.8959	32.9266
CG12035	0.348345	22.0528	23.5941
Gk	0.315004	26.8039	30.1706
CG8001	0.517437	23.1026	27.5872
CG12018	0.494502	25.3778	31.131
mRpL46	0.0444915	28.8629	30.1355
Cdc37	0.03472	30.5412	31.3487
Patj	0.130392	24.7365	26.017
GV1	0.385605	22.0764	24.4853
Cpr62Bb	0.450483	25.0626	29.1683
alpha-Spec	0.173133	23.6309	24.4893
dlt	0.454305	23.6958	26.6482
CG2021	0.111871	27.964	29.5439
Cht2	0.0810593	28.3897	29.6771
drpr	0.430999	22.4584	23.6589
CG13931	0.328258	22.0244	24.339
RpL23A	0.0330966	33.7566	34.8762
CG7971	0.538901	22.4503	25.494
CG7967	0.0262596	28.6839	29.2224
CG17249	0.459376	22.2415	23.8824
alphaCOP	0.0299953	31.906	32.7997
metl	0.434976	24.4384	27.3562
nSyb	0.418824	24.9731	28.7242
CG13928	0.236173	26.2821	28.3029
CG13926	0.0414647	28.0649	28.6608
CG7879	0.465476	22.9576	25.1122
CG12099	0.380236	22.4093	23.8498
CG12091	0.191765	24.4781	26.2111
CG12024	0.28144	25.6593	28.1168
CG12025	0.415383	22.4571	24.5585
Tmhs	0.409838	22.1215	24.0581
Mfap1	0.475831	22.4021	24.7063
Cnb	0.232939	21.9686	23.39
SCOT	0.0500434	30.4585	31.6093
mu2	0.494396	22.6818	24.6188
dre4	0.266143	27.5814	31.564
HBS1	0.309034	25.3399	27.9579
R	0.0358331	29.5455	30.412
Cpr62Bc	0.321294	27.8411	33.4875
CG8960	0.33547	22.0294	24.4229
CG2034	0.0558877	29.2544	30.787
CG13806	0.166676	21.9379	22.8679
CG32302	0.568638	23.2173	26.6268
yellow-g2	0.638875	23.336	29.9666
CG8993	0.0477284	30.2883	31.5544
CG9004	0.555547	23.412	26.8363
CG15877	0.431923	22.7639	24.6712
mRpL23	0.0675897	29.839	30.9936
CG1317	0.455769	22.2123	24.9386
yellow-g	0.66671	23.3418	31.9041
ecd	0.245434	25.5979	27.9932
oxt	0.387761	22.3543	23.8639
CG1275	0.572841	22.5553	25.9362
CG9018	0.117362	26.5941	27.9731
CG5707	0.323413	24.9306	27.0238
CG15820	0.471196	24.7533	28.3089
CG5704	0.245762	25.1293	27.4253
RpL8	0.0203928	34.5148	35.4287
dos	0.488811	22.5036	24.7943
CG16985	0.0698861	28.0437	30.0165
CG16986	0.312657	25.943	31.0241
MEP-1	0.394826	25.5748	29.7727
CG1143	0.51582	22.2631	25.9919
CG1246	0.377793	22.0952	23.7133
Acp62F	0.697126	23.2437	32.1874
Aats-pro	0.0326621	26.739	27.2444
Pxn	0.275335	27.234	30.1837
msn	0.145188	27.1713	29.4165
CG16758	0.184184	27.8871	30.4577
Cyp4d20	0.561558	23.2969	27.7457
CG16762	0.523289	23.8225	28.5226
Non2	0.0394613	29.4657	30.5901
Atg2	0.488397	24.3235	28.0276
pgant6	0.281922	25.2395	27.7269
CG2107	0.017967	30.5162	31.3152
CG2113	0.413355	22.1155	24.2853
CG2162	0.435027	23.7745	26.8389
Jafrac2	0.0570567	29.1279	30.3636
CG32485	0.259498	24.7772	26.8434
CG1271	0.456351	22.8177	24.8413
CG16753	0.445467	23.7647	26.7694
CG11486	0.302033	22.0175	23.2913
CG32486	0.167028	27.0014	30.3629
scramb2	0.102623	27.3147	28.7068
CG32488	0.152901	21.9337	22.6197
spz5	0.448883	22.527	24.6594
CG12093	0.258254	27.3357	30.0987
CG9977	0.10025	28.1727	29.7855
CG1291	0.0544339	28.7389	30.0759
CG32278	0.57911	24.0359	29.5463
CG32281	0.319027	25.3792	27.8127
Girdin	0.45217	23.6586	27.0306
CG14957	0.417143	22.239	24.2754
Hsp83	0.0192925	35.3852	36.3629
gry	0.43059	24.096	26.652
CG17737	0.0417975	30.1263	31.2076
CG11505	0.108608	27.9154	30.0223
CG12017	0.442629	22.1196	25.9565
CG12009	0.601601	23.6452	30.0784
Drsl2	0.556125	24.8547	29.8007
Drsl4	0.649677	23.3083	30.5543
Drsl5	0.428993	24.6053	28.1022
CG12016	0.51883	22.5467	24.4328
PHGPx	0.0516521	32.5683	33.9103
CG14961	0.690597	24.6085	35.4656
kst	0.067865	31.5365	33.8659
Drs	0.510344	24.3942	29.3191
CG12010	0.41037	24.3091	26.8255
CG12014	0.343688	22.1401	22.9035
YT521-B	0.443581	23.1519	26.4232
Drsl6	0.410983	22.1254	24.5532
Drsl1	0.619961	22.8111	27.168
CG14969	0.429509	23.963	26.6537
Strip	0.240723	25.6995	27.974
CG14968	0.463472	22.369	24.6435
CG17746	0.194693	26.42	28.3736
RpL28	0.0284888	34.4628	35.5412
CG33160	0.606013	22.4477	27.6815
CG32277	0.387608	22.093	23.8917
CG14966	0.309415	22.9501	23.9216
CG14965	0.484795	22.4829	24.429
CG14963	0.4905	25.3318	29.6571
NDUFS3	0.0351766	32.9939	34.3501
CG12082	0.0382721	31.5692	32.7396
CG11537	0.383873	22.0872	24.2025
prominin-like	0.402062	23.8984	26.6776
Cht7	0.389318	26.1522	31.0481
Eip63E	0.20841	25.485	27.3659
ImpE2	0.606032	25.8972	34.7224
CG32267	0.268002	25.0214	27.2702
eIF5B	0.0933046	30.0217	31.8017
IntS10	0.454238	23.774	26.5294
CG12006	0.304647	25.0154	27.5806
Scsalpha	0.0374187	33.4601	34.8756
enc	0.400194	23.9394	26.9993
CG14977	0.212166	23.6365	24.8229
Sc2	0.0834537	29.6055	31.4585
ida	0.55633	23.6154	27.5414
CG10853	0.682982	24.1464	31.559
CG10863	0.0270603	32.8919	33.5626
CG12766	0.526743	24.4401	28.9547
mge	0.268384	24.8991	27.3696
Ccz1	0.317111	23.9781	26.0095
Acp63F	0.636306	22.4961	30.0395
ntc	0.46809	22.2952	24.1926
CG32264	0.321801	22.0315	23.4432
Mul1	0.299516	25.318	27.205
Rcd5	0.428168	24.1006	26.7906
CG1136	0.583002	23.2127	28.4904
CG18869	0.378387	24.5048	27.1702
dib	0.653931	22.9413	28.2682
CG14990	0.516306	24.6526	28.9442
Fit1	0.101804	28.4748	29.843
Ack	0.551392	22.9682	26.2815
Ras64B	0.128767	27.5052	29.2197
Akh	0.498662	22.405	24.9041
CG1299	0.334265	25.8342	28.9195
Ero1L	0.164901	25.7062	27.1734
CG18675	0.539161	23.0031	25.9497
Cpr64Ad	0.245888	29.9181	34.0654
CG14997	0.0376215	29.5858	30.5111
pav	0.528378	23.9717	28.7046
CG1265	0.299293	23.5839	25.2504
CG1309	0.0249636	28.9748	29.3855
CG1273	0.389531	22.1405	23.4654
CG1311	0.255848	25.6086	27.775
CG1316	0.0796405	28.8297	30.3506
TfIIEbeta	0.279247	24.9648	27.0346
Hexo1	0.101544	29.2635	31.1962
CG11583	0.207801	27.7504	31.3179
CG11586	0.491423	22.546	24.142
ago	0.577981	22.8125	25.9041
ImpL2	0.243062	25.3102	27.1474
Cpr64Ac	0.595309	26.443	36.4906
Cpr64Ab	0.35507	25.5456	29.685
Cpr64Aa	0.593711	26.7597	36.618
VhaM9.7-c	0.386922	23.3267	25.4903
mas	0.458157	22.607	25.2345
Rop	0.0609628	29.7153	31.0846
RfC4	0.356808	26.6691	31.4355
Chd64	0.0674107	32.4253	33.8522
CG14995	0.43934	22.5815	24.4138
Gad1	0.312513	28.0985	32.6616
Faa	0.210738	28.6498	31.7166
Dpy-30L2	0.564815	22.7845	26.1516
CG11594	0.11456	29.5478	31.4933
Claspin	0.4053	22.1091	24.0158
CG32250	0.16705	25.7325	27.5223
mRpS6	0.0431126	29.8913	30.8114
Syx17	0.295035	22.8133	24.4917
DOR	0.563652	23.0652	26.5105
nAChRbeta1	0.435053	22.2569	24.1489
CG12607	0.494495	24.3035	28.9646
CG11357	0.395206	22.1061	23.6571
Rpd3	0.070708	29.3569	31.2264
Src64B	0.273909	25.4806	28.0995
CG32243	0.456943	22.274	25.2176
CG15022	0.249255	21.9771	23.5339
CG15019	0.348035	25.5826	29.1495
CG11342	0.466486	22.5675	24.6968
CG15014	0.0592199	28.0026	28.8782
dyl	0.529231	23.8792	28.6585
Aats-leu	0.163522	26.9353	29.1279
CG12493	0.527146	24.1719	28.3518
CG18418	0.434605	22.2347	23.5625
CG7514	0.161871	21.9359	22.8335
Con	0.404932	24.0078	27.2129
CG15211	0.362674	25.1503	28.7678
CG15209	0.518707	22.9247	26.0793
CG17333	0.0207296	29.9524	30.3956
CG2186	0.493782	22.927	25.2375
v	0.307469	25.2393	27.7559
CG2145	0.208702	28.9402	31.7204
CG11160	0.499611	22.3894	24.632
CG15203	0.427047	23.7963	26.7754
CG1537	0.529516	22.3277	25.2461
CG1582	0.390827	25.6432	29.1181
Ork1	0.533297	22.4719	25.8995
CG1637	0.551085	22.928	26.108
CG1637	0.0568147	28.534	29.4421
CG1637	0.294352	24.3054	26.3489
feo	0.616178	23.6406	29.6929
sbr	0.240778	26.3367	29.3353
CG32669	0.486689	22.282	24.9176
sesB	0.0491333	34.7401	36.4356
Ant2	0.660914	22.6742	29.0086
Vago	0.219794	27.0299	29.7763
CG2076	0.327329	23.9503	25.8116
CG2061	0.300645	24.5265	26.9729
Hsp60	0.0184063	34.3257	34.9439
Rpt3	0.0333232	32.2265	33.066
CG18292	0.479506	23.6057	26.5868
CG15202	0.539129	24.7088	30.9485
CG15201	0.52018	24.3556	28.4586
Lint-1	0.441087	22.2996	23.7491
Dlic	0.0351164	29.2916	30.1169
CG1657	0.319348	23.2419	25.2144
CG1738	0.424988	22.4327	23.8283
CG11752	0.375552	25.3141	30.0903
CG1737	0.133898	26.9896	29.2041
dsh	0.396568	24.5681	28.1096
hop	0.451739	24.2794	27.5812
l(1)10Bb	0.201409	26.4588	29.1671
antdh	0.629122	23.3553	28.2713
Ran	0.0450204	32.3022	33.922
ssp7	0.335005	26.0707	29.2623
Klp10A	0.117459	28.3187	31.2236
Gtp-bp	0.0487976	29.5689	30.4577
Tim8	0.0415033	28.6254	29.5882
dlg1	0.214578	23.8417	25.3906
Gs2	0.431587	24.9303	30.2843
HP5	0.571007	22.8562	26.5845
Cyp4g15	0.521026	23.4365	27.4637
CG1749	0.0377482	29.996	30.8057
Spase25	0.0317112	30.6226	31.4131
PGRP-SA	0.576788	23.4142	27.7569
CG11699	0.454809	22.7925	25.0267
rho-4	0.36359	22.9352	24.6764
CG1703	0.128735	28.3745	30.4647
Ptp10D	0.403648	23.864	26.186
bif	0.265406	25.241	27.3399
CG2444	0.537947	25.7107	32.0906
CG2371	0.40973	23.4421	25.7359
RPA3	0.228537	26.673	29.9835
CG2247	0.469091	24.2996	27.9613
CG1561	0.599222	24.125	29.1146
RpII215	0.277	27.4568	31.155
CG1572	0.565913	24.0088	28.5531
Evi5	0.457634	22.4561	25.1481
prtp	0.0295829	32.4676	33.5643
Tango10	0.450448	22.5052	23.7637
m	0.484768	22.2224	25.0352
CkIIbeta	0.0337031	29.9108	30.9205
Cyp28c1	0.21459	23.713	25.7375
CG1847	0.375246	23.5544	25.1373
CG15739	0.350258	25.1969	29.4505
sicily	0.135385	27.7137	29.1729
wisp	0.580484	22.3618	27.6073
regucalcin	0.107916	33.9242	36.596
fw	0.446072	22.8522	24.4472
CG18130	0.439992	22.2404	24.3717
Sclp	0.381427	26.9635	31.7444
pot	0.24016	25.9756	28.3195
Upf1	0.270329	26.9023	29.8016
CG2025	0.0869716	29.6203	31.1665
CG10347	0.329399	25.4213	28.4122
p24-1	0.125627	27.6297	29.1674
CG1578	0.154981	27.3519	29.8171
Hsc70-3	0.0315624	35.0287	36.3509
dy	0.447359	24.1989	29.6304
CG9360	0.38751	25.7761	29.9558
Amun	0.148439	29.2266	32.0566
FucT6	0.455491	23.0389	25.088
CG15735	0.501164	25.4725	32.3021
Tango4	0.249579	25.9386	29.2831
Cyp318a1	0.399238	22.2265	23.4271
Cyp311a1	0.403193	23.2736	25.6936
Usp7	0.0704371	30.3912	32.3081
Chrac-16	0.479436	24.609	29.2446
Cpr11A	0.51827	24.3849	29.827
Lsp1alpha	0.512661	27.7458	36.0564
CG2556	0.542427	22.4961	26.8052
Cpr11B	0.598895	22.9629	28.2665
CG2543	0.378087	23.3155	25.6735
CG1463	0.50678	22.6085	24.6081
CG1824	0.287637	26.2999	29.2753
CG11138	0.560864	22.7271	26.1418
CG15731	0.574335	22.4583	26.3167
CG2540	0.403945	24.2166	26.7704
Tomosyn	0.35999	23.0798	25.1575
CkIalpha	0.0518953	29.5912	30.5845
Tis11	0.492655	23.0272	25.767
CG3775	0.248107	24.7242	28.3742
mRpL49	0.199099	26.4297	28.2855
CG4645	0.345468	22.0796	23.0831
Brms1	0.365814	22.0733	23.7618
CG4404	0.414015	22.104	24.7699
CG4407	0.393478	23.5517	26.8079
CG32649	0.185241	27.7097	29.6044
ade5	0.0341378	31.7506	32.7792
Aven	0.395223	23.4677	26.13
fne	0.425223	22.2857	24.1953
lic	0.194034	28.6821	32.0794
CG2200	0.0214246	31.1836	31.8882
CG42237	0.522274	23.2871	27.5978
CG15717	0.0344966	29.9465	30.6032
CG4332	0.398778	24.6589	28.2517
CG12096	0.089248	27.7375	29.4698
CG32641;CG32640	0.33324	23.8793	26.1421
REG	0.0474991	31.8572	33.2881
mew	0.22219	25.6651	27.3521
CG2453	0.120901	26.0061	27.4192
CG12723	0.384806	22.238	23.2868
Bap60	0.110896	28.7511	30.4582
hep	0.47585	23.4681	25.9669
CG12715	0.653874	23.3742	30.7266
comt	0.327804	27.0838	32.0924
CG15743	0.307161	24.363	26.9441
CG15744	0.161933	21.9388	22.562
CG1622	0.468585	23.9203	26.7691
Jafrac1	0.032711	34.0664	35.0657
CG1640	0.0333512	33.1528	34.2573
Tim9a	0.12696	27.8456	29.485
CG1673	0.251464	26.8051	30.4932
GstT4	0.119502	30.0314	31.798
Set2	0.452971	22.7746	24.6144
CG15754	0.589334	22.8675	26.705
CG15756	0.626623	23.1522	27.6693
Cpr12A	0.558441	24.4952	29.2349
Yippee	0.287301	24.8837	27.743
Rbp1-like	0.270456	24.1927	26.3448
RpS15Aa	0.0548897	31.5014	32.7449
CG1764	0.331227	23.9227	25.9959
CG32631	0.639409	24.3442	31.416
CG32633	0.321932	27.813	32.5165
Tango13	0.214084	24.9286	27.0751
BthD	0.475598	22.4102	24.0021
CG11164	0.487437	24.7946	30.1551
CG11162	0.272033	21.9964	23.2071
CG11158	0.366371	25.6692	30.1236
mus101	0.604495	23.7838	29.5991
CG11134	0.0250505	29.1122	29.6904
CG11151	0.114825	31.4192	33.6267
Rtc1	0.526227	24.5693	29.1608
Yp3	0.150496	32.9597	38.264
rdgB	0.407524	24.2126	26.9298
CG11095	0.452693	22.9221	26.2098
Nup93-1	0.288897	26.9731	30.6806
jub	0.483752	23.8836	26.6902
Clic	0.0371662	30.5363	31.3736
CtsB1	0.0693783	31.1976	32.7412
Pdcd4	0.0670278	30.4073	32.0007
Grip91	0.529383	24.8629	30.483
g	0.248871	25.7856	28.1203
CG9940	0.261556	26.5675	29.0434
CG12177	0.0990135	27.1165	28.7819
CG2691	0.425241	25.8046	30.6132
tth	0.401435	23.0205	25.1289
Ndc80	0.602038	22.751	26.4587
ben	0.0370047	30.9112	31.961
CG12480	0.605701	22.6112	26.2863
CG32603	0.492816	25.3766	32.5627
yl	0.670001	24.4653	33.6173
CG11590	0.354369	22.1045	23.1955
l(1)G0007	0.31173	25.1492	27.9618
mRpL38	0.0573534	29.6567	30.5596
CG1434	0.464018	24.2936	27.8951
CG1461	0.602188	23.9956	29.1128
CG9411	0.599817	22.7685	28.3669
mRNA-cap	0.400751	25.6584	29.7086
CG11674	0.635403	23.5626	29.4772
l(1)G0469	0.468662	22.4335	24.112
nmdyn-D6	0.349091	23.7291	26.2908
Ag5r	0.386178	22.1161	23.7396
Ag5r2	0.600237	23.0333	26.7883
CG15890	0.376995	22.091	23.526
mRpS25	0.051037	29.4596	30.2582
CG14411	0.107171	26.4678	27.4743
Flo2	0.108284	27.9287	29.7386
be	0.451999	22.2232	24.0354
CG5541	0.482464	22.3823	24.315
CG5548	0.0751821	29.6918	31.606
CG5599	0.0413699	29.4019	30.2963
CG15027	0.484456	23.8674	27.6045
Lsd-2	0.261736	24.5149	28.3503
opm	0.267716	25.1695	27.3362
pdgy	0.0615819	30.9179	32.3179
CG32591	0.359684	22.0798	23.3984
CG9503	0.416828	22.3501	23.9276
CG12398	0.623867	23.8152	28.8834
CG9509	0.241032	27.962	31.1444
CG9512	0.298171	28.1904	32.9088
CG9514	0.47159	22.2183	25.0107
CG9521	0.663257	23.5169	29.8108
CG9522	0.393844	22.1384	23.5284
CG32590	0.48801	22.3903	24.2443
CG14407	0.0406621	29.0102	29.8873
rut	0.344511	22.0465	24.0808
CG5877	0.484085	22.7182	25.2827
Top1	0.292397	26.2434	30.0352
dah	0.628034	22.7298	27.6169
HDAC6	0.0523963	28.8855	29.74
CG6227	0.166414	28.0766	30.606
Pp1-13C	0.41665	22.2791	23.3381
CG12608	0.342231	25.7394	29.4404
CG9114	0.49171	22.5145	24.2825
RpL37a	0.0377347	30.0461	30.8214
Cyp4s3	0.359387	26.5871	30.0405
Ahcy13	0.0418386	32.723	33.7715
CG6299	0.35594	25.5016	28.6383
CG6308	0.489838	22.4026	24.6493
CG6340	0.376399	22.202	23.0652
Gmap	0.381299	24.3099	26.9981
CG7860	0.198362	29.5346	33.0498
CG7872	0.441712	24.4803	27.3274
CG8097	0.435593	24.2326	27.6815
CG8128	0.215119	28.2808	31.1504
CG9281	0.0902599	30.9226	32.9651
Pis	0.353484	23.3487	26.4782
sog	0.307996	22.0401	22.9571
CG9213	0.455457	22.2113	24.1281
CG9203	0.574698	22.6087	25.7725
Grip128	0.39582	22.1009	24.1112
shtd	0.554696	24.2325	29.0224
Scamp	0.426347	22.6391	24.266
l(1)G0136	0.152133	27.287	29.1317
Tcp-1zeta	0.0371908	33.5146	34.9806
CG8239	0.0551104	27.6722	28.3536
mRpL3	0.0488865	30.2712	31.2953
mRpS30	0.0334178	30.8129	31.8479
CG8578	0.200692	25.6422	27.5145
Gbeta13F	0.0294152	31.2553	31.9082
Gapdh2	0.0163109	33.631	34.1263
CG16952	0.431135	22.1512	24.2529
CG15916	0.407189	22.2319	23.7568
CG8924	0.438984	22.1751	23.9307
Rrp47	0.403402	23.05	24.7057
CG8931	0.368956	23.9541	25.8259
exd	0.237988	25.9663	28.1727
CG8939	0.366755	26.0849	30.9982
vap	0.268732	26.0741	29.2965
eIF5	0.0443594	30.848	31.9382
CG9172	0.11673	29.1192	31.4933
Stim	0.0503757	28.8416	29.8366
Ranbp16	0.328344	26.382	30.1212
MSBP	0.0581871	30.4402	31.8543
AlkB	0.554216	22.9814	25.8377
Myb	0.47876	22.3418	24.7345
UBL3	0.513633	22.8933	26.0027
sun	0.534247	25.2606	31.1074
Aats-arg	0.0594007	30.8887	32.0875
Chc	0.0526544	32.9206	34.0931
CG8974;CG32581	0.3637	22.1266	23.3095
Paf-AHalpha	0.0655512	29.5698	31.0882
Efhc1.1	0.639823	22.6324	28.2766
CG8952	0.343656	22.9011	23.9942
CG8944	0.604852	22.7616	26.3486
CG11679	0.315503	25.175	27.4533
Arp6	0.497715	22.7175	25.3052
Mfe2	0.0906816	31.3493	32.7708
Prosalpha4	0.0332763	32.0536	33.1151
eas	0.14953	26.757	28.4335
CG3560	0.0415876	32.5946	34.4124
caz	0.240625	25.2165	27.1361
CG3679	0.597783	23.063	27.3423
CalpC	0.512787	22.5583	24.8928
sl	0.497373	23.4484	26.3996
nonA	0.0674703	30.515	32.1653
CG9917	0.0915391	27.9158	29.5351
Cyp1	0.0196024	33.5747	34.2191
CG9914	0.0986867	32.1319	34.2325
CG9911	0.0358117	31.8328	33.0731
CG32576	0.417561	24.5304	27.6601
kat80	0.402112	22.6236	24.3619
Nipsnap	0.0185655	31.0763	32.0617
Fur2	0.320049	24.2607	27.1095
CG4239	0.398032	25.2541	29.2964
mei-41	0.523558	22.5589	24.7812
Traf-like	0.41155	22.3347	23.5574
rngo	0.0565407	29.5711	30.4768
Rbp2	0.035804	31.2635	32.1607
Ubc7	0.0336118	28.945	29.6908
Nup153	0.225588	26.4731	29.7063
mbt	0.224156	25.7544	28.5607
Rok	0.246699	25.827	28.26
CG9782	0.423605	25.0279	28.7667
CG9784	0.156837	26.2046	27.6597
SMC3	0.348626	25.3201	28.7321
CanA-14F	0.194115	27.7438	30.4693
Pp2B-14D	0.072471	28.8681	30.5455
CG9903	0.539335	22.4463	26.5633
Cnx14D	0.535711	23.0481	27.0514
eIF-2alpha	0.0314757	32.0017	32.8465
CG9947	0.18582	26.2202	28.2262
AnxB11	0.259458	23.6091	25.6169
TH1	0.449531	24.3223	27.7069
CG9992	0.436225	22.4465	24.9634
RpS19a	0.018833	35.283	35.7292
mthl1	0.480677	22.2627	24.3
CG32573	0.509926	23.4781	26.8495
CG4653	0.455678	25.0084	29.75
TwdlX	0.568217	24.8668	30.6466
TwdlY	0.59847	24.225	29.8994
Twdlalpha	0.584028	23.5523	29.3245
mRpL22	0.290602	26.6112	29.3494
CG4789	0.347832	24.4153	27.4477
CG4829	0.537336	22.8218	27.0831
CG4872	0.229057	25.3303	27.0753
Rcp	0.433368	22.2807	23.9215
CG4880	0.504511	22.2234	25.7319
CG4928	0.496573	24.5362	28.4754
CG9099	0.178789	26.19	27.6593
CG9104	0.540631	22.586	25.264
CG9125	0.560836	23.1221	26.605
CG9132	0.0313938	28.7448	29.3657
Rrp45	0.330376	25.9137	29.0916
if	0.194262	29.1336	31.8311
CG9634	0.112503	26.8851	28.0093
CG9673	0.34215	26.6564	31.5253
spheroide	0.318328	26.7077	30.2344
CG9676	0.510181	22.2368	25.6261
Sep4	0.386926	24.0011	26.4886
Axs	0.581042	22.9274	26.5484
CG13010	0.191274	21.9521	22.7358
CG9723	0.405511	22.2438	23.3054
SmG	0.0748039	28.6992	30.093
CG4991	0.544944	22.288	26.7148
CG5010	0.364041	23.5463	28.0638
baz	0.568482	22.7051	26.7698
CG32564	0.429048	24.0259	28.6758
CG18258	0.601544	22.3582	30.0125
CG5162	0.254353	27.4162	33.525
CG12995	0.485376	22.2312	25.044
xmas-2	0.520562	23.8164	27.0378
RpS5a	0.0278251	32.8499	33.8973
Arpc3B	0.397627	24.3042	27.2708
CG8949	0.530937	22.4607	25.0774
CG9086	0.227254	26.7032	29.1603
CG13001	0.564645	22.89	26.9928
wus	0.500575	22.3479	24.8082
CG5445	0.420618	23.1455	25.4802
CG5613	0.397499	23.8866	26.5425
CG8568	0.387902	22.0849	24.1102
CG8611	0.422848	25.2869	29.8078
Fim	0.19041	26.7852	28.7639
Fim	0.354647	25.0743	28.8228
CG8664	0.533472	22.3934	26.1436
CG8675	0.344994	22.0774	23.3834
CG8915	0.50283	23.707	26.4891
X11L	0.371192	22.7382	24.2132
CG5703	0.0454134	32.382	33.9788
CG5800	0.47777	24.2714	28.7235
beta-Spec	0.24374	25.4272	27.5034
par-6	0.145999	27.548	29.7257
CG6398	0.398836	24.4816	27.6984
e(y)1	0.168383	26.4008	28.3129
Ucp4A	0.297253	25.838	29.7983
CG6506	0.535774	22.7977	25.1968
CG15814	0.42385	22.7048	24.3409
CG8142	0.291352	27.0648	31.5437
CG8173	0.565747	24.3627	29.8282
CG8188	0.617486	23.6352	29.2095
chas	0.464013	22.3273	24.7401
CG12990	0.50477	22.1922	27.1908
IntS2	0.511211	24.116	27.8354
RhoGAPp190	0.202964	26.7636	29.5293
CG8289	0.470437	23.8233	27.1406
CG8326	0.542171	23.3461	26.692
CG6769	0.231401	25.8776	28.2138
Vps4	0.0258855	30.4174	30.922
CG6847	0.380498	22.2942	23.1976
dik	0.499702	22.2686	24.9993
scu	0.0169849	33.7301	34.2759
Taf8	0.469707	22.5912	24.4103
CG7135	0.579133	22.5023	25.9666
wupA	0.291266	26.3918	29.3758
CG7192	0.389078	22.6214	24.1967
CG7536	0.307247	22.0588	22.7379
CG7772	0.239889	25.7244	28.3945
Arp8	0.453325	24.0394	27.0309
Frq1	0.467416	22.491	24.4825
CG6106	0.30491	22.048	23.1874
CG6179	0.550862	22.8097	26.576
Tsf1	0.113367	33.5674	36.7837
CG32548	0.488461	24.6318	31.448
CG32549	0.33987	25.404	28.3138
betaCOP	0.0517258	30.5815	31.5138
Aats-his	0.35987	24.3998	27.205
CG15047	0.463074	22.167	24.9908
CG6540	0.455328	24.0878	27.4684
fu	0.425881	24.1596	28.8
phm	0.387931	24.2551	26.4082
CG6617	0.0645569	29.2191	30.9234
Ggt-1	0.39099	26.0307	30.7315
GalNAc-T2	0.0634916	28.1474	28.9675
CG15043	0.39816	23.584	26.9687
CG15044	0.596432	23.0358	27.5625
CG15046	0.354592	22.1085	23.2065
psh	0.451993	23.691	26.4234
CG6891	0.25038	27.4116	30.652
Atg101	0.335016	22.4858	23.611
CG7288	0.28384	25.7095	28.7031
CG32544	0.474798	22.3116	24.2667
CG7332	0.0952566	27.8679	29.9046
CG7349	0.635421	23.0717	28.1015
CG7358	0.55942	23.5956	27.3393
CG7322	0.0562803	31.673	32.9056
CG7280	0.0544612	27.9885	28.8748
bnb	0.362792	29.5921	37.6916
CG18259	0.384733	22.1795	23.7967
CG7406	0.455439	22.1837	24.9991
CG7453	0.437943	22.166	24.1895
Mec2	0.56909	23.6363	28.0698
Mur18B	0.498565	24.5167	28.8733
CG7884	0.466838	22.2359	24.2578
CG7889	0.125538	27.3222	28.9878
out	0.344878	22.1446	22.8905
CG8051	0.415611	22.2968	23.4662
CG8034	0.441592	22.6178	23.9524
CG32536	0.322347	24.4468	26.5201
rictor	0.487804	23.1011	25.1541
Ulp1	0.512475	24.1362	28.092
CG7990	0.423986	22.2832	23.7317
CG7556	0.0976647	25.9665	26.8041
kek5	0.443389	23.0468	26.2829
Nat1	0.0697328	31.1714	32.6655
CG12203	0.0425968	31.2162	32.5053
Pfrx	0.0869474	28.9704	31.0395
car	0.1266	26.3072	27.662
CG14205	0.594946	22.5338	26.2016
RpS10b	0.0154918	33.6967	34.166
CG14207	0.535383	23.984	28.0305
Shawn	0.467116	23.4097	26.142
CG14210	0.444936	24.1453	27.5184
MKP-4	0.477955	23.0628	25.2829
Rcd-1	0.238843	27.2378	30.6858
CG14215	0.444481	24.9154	29.3108
Ssu72	0.190869	21.9523	22.697
Zw	0.0628211	31.0479	32.6656
Ubqn	0.0342409	30.3104	31.2378
Cdc42	0.0297553	29.139	29.6082
dome	0.397239	24.1526	27.1447
Ranbp21	0.376924	26.193	30.2996
Arp10	0.195438	26.8539	29.0113
CG12237	0.237347	25.1695	26.7529
e(y)3	0.533342	23.2691	27.2101
NAA20	0.141511	27.1553	28.9555
Tim9b	0.0917444	25.2256	25.9637
Tao	0.247247	24.927	26.8114
Grip84	0.318193	25.7534	30.5118
pcm	0.246303	26.8569	29.9779
mRpS14	0.172619	26.2025	27.6811
CG14230	0.395975	24.6259	27.5879
AP-1-2beta	0.0189124	30.9417	31.3443
parvin	0.0820887	29.2788	30.3115
Alr	0.159107	24.7068	26.0351
Pmp70	0.172554	28.1085	31.0159
Nup205	0.353101	27.3111	31.8888
pico	0.382895	22.1061	23.4581
vfl	0.539675	22.4446	24.9597
CG12702	0.625153	23.8553	29.4383
meso18E	0.492594	22.3034	24.7188
CG14232	0.0532301	26.6504	27.3006
CG14231	0.426864	22.4631	24.1255
CoVIb	0.408778	22.1532	23.7315
gig	0.541257	23.0429	25.8782
Su(var)3-3	0.593547	23.3707	27.4243
CG13813	0.473826	22.5242	24.2308
CG6951	0.418155	22.2325	23.5829
Clc	0.113279	29.3064	31.1106
CG6597	0.309433	25.0354	27.9844
polo	0.520129	25.8018	33.3136
alphaSnap	0.0192389	30.1848	30.7901
Spn77Ba	0.242236	27.7874	30.3684
Spn77Bb	0.696645	23.094	33.4839
CG32225	0.360363	22.1251	23.4259
Pex23	0.42762	22.2116	23.6274
FRG1	0.437973	22.4336	23.889
CG17122	0.475735	22.3518	24.463
CG17233	0.463272	22.4327	23.9573
CG6933	0.504342	24.7959	29.7365
CG7017	0.581111	22.6698	26.3517
CG7298	0.506983	23.8865	27.1515
CG7328	0.322585	24.0422	26.0919
CG7365	0.467207	22.4268	24.3572
CG14184	0.117984	26.7251	27.6936
HLH106	0.516727	22.9382	25.8005
CG15881	0.0440597	28.67	29.9306
Kap-alpha1	0.05584	28.2581	29.5697
Deaf1	0.338485	22.1591	22.9422
kto	0.532818	23.8752	27.5651
Papss	0.493658	22.3538	24.2834
Prp3	0.241188	25.4797	27.7255
Rpn1	0.0305088	32.9956	34.1608
CG7770	0.105342	28.5525	30.1338
Grasp65	0.0432834	29.1474	30.2248
RhoGDI	0.0242774	31.0892	31.8241
Ac76E	0.556398	22.5313	25.5467
CG7646	0.273584	26.1438	28.5403
Nca	0.0778504	27.5651	28.7018
Tom20	0.0363986	29.2849	30.0075
CG7668	0.472903	23.9559	27.5719
CG7433	0.0524767	32.9709	34.3533
fln	0.61332	26.3451	35.0433
CG8004	0.0366488	27.9285	28.5081
Su(z)12	0.540491	23.2761	26.4294
Mtr3	0.386697	25.5664	29.0397
Mi-2	0.139226	28.9788	32.3363
Su(Tpl)	0.437998	22.3842	23.8035
Rab8	0.142936	26.7613	28.2098
trc	0.0431269	27.3619	28.0579
Cyp305a1	0.525125	23.5658	27.2388
CG14103	0.0973959	27.7019	29.0186
CG14102	0.493112	22.5212	24.6203
Cpr76Bb	0.638907	22.8211	30.4637
Rcd7	0.367978	22.0639	24.1219
CG9300	0.449314	25.5306	29.7528
CG9330	0.0929867	29.0648	30.8134
Taf6	0.173043	26.078	28.5091
CG9368	0.441576	22.4393	23.7303
CG9372	0.39913	25.2386	28.153
CG9376	0.452256	22.1978	24.2319
asf1	0.3097	26.2128	29.8226
ms(3)76Cc	0.417175	22.7132	24.7045
Gbeta76C	0.622184	24.9827	32.1632
CG42638;Trpml	0.227655	23.9067	25.5641
serp	0.315218	29.1735	33.7141
Oat	0.199505	30.3102	33.2975
CG8786	0.382972	22.1071	23.888
l(3)76BDm	0.100928	26.0448	26.8819
CG14100	0.28825	25.939	28.7885
CG9231	0.0426209	29.2755	30.2667
Shal	0.473709	22.59	24.3956
l(3)76BDr	0.19551	27.2619	29.5713
CG9452	0.523282	23.8593	28.2205
CG9451	0.441962	24.0214	26.6151
CG18294;CG12519	0.413433	26.057	30.6984
CG14095	0.249914	28.7913	32.6465
rept	0.0641013	30.3453	32.0887
Bet1	0.437106	22.4581	24.2079
CG9666	0.58156	23.1597	26.9929
Chd3	0.495827	23.2499	26.9273
pip	0.619227	23.0524	28.368
pip	0.5781	22.7288	26.4998
pip	0.41114	22.1201	24.4366
pip	0.492044	22.2276	25.2846
pip	0.455217	22.212	24.3406
pip	0.552754	22.3956	25.9591
pip	0.577447	22.7812	26.8941
Gbs-76A	0.452794	23.8795	26.6797
CG9629	0.140086	30.6973	32.6135
Max	0.521006	22.4164	24.9643
nes	0.260365	24.4778	26.1613
mRpL21	0.143851	28.1226	30.1338
CG14075	0.461385	22.6542	25.0846
CG6812	0.250251	26.6086	29.6212
MESR6	0.209176	27.2959	30.4361
fz2	0.418241	23.8672	26.8661
Gem2	0.564372	23.2842	27.3786
CG10424	0.0489948	29.1078	30.04
CG11577	0.199697	26.5447	28.972
Mkp3	0.538679	22.7925	25.7039
Acp76A	0.706932	23.1238	33.5024
CG18136	0.468982	24.963	29.1962
CG3808	0.226505	26.5166	29.1791
CG18135	0.224684	28.6377	32.2147
CG3819	0.637928	22.9926	27.4242
MYPT-75D	0.487368	22.4781	24.2777
GNBP1	0.566829	24.0004	28.5614
CG32202	0.448103	22.4833	23.7986
CG6885	0.504305	22.2066	26.4884
MED11	0.40277	24.0473	27.6121
Atg3	0.0988145	28.3068	29.702
HipHop	0.355565	22.0858	23.2059
Cat	0.103409	33.3373	35.5688
CG6852	0.029612	29.7788	30.4612
Ugt	0.0484961	30.7661	32.0582
RpL26	0.0324798	33.3	34.3216
CG6841	0.147517	27.2056	29.3572
CG6839	0.647812	23.3083	28.3167
CSN1b	0.265559	26.5867	29.6675
CG3902	0.0203776	33.074	33.7702
Indy	0.204512	26.5426	28.8168
ftz-f1	0.573537	22.8061	27.2202
Cyp12c1	0.125766	27.9039	29.8586
Chmp1	0.0380212	28.6633	29.3336
Capr	0.0825547	30.5893	32.7417
CG7271;term	0.600659	22.5035	27.9801
bora	0.42904	22.1296	23.7788
Met75Cb;Met75Ca	0.689391	22.7417	32.6023
CG4306	0.2466	28.1347	31.3629
mRpS26	0.158349	26.7344	28.3272
CG7341	0.593242	22.7014	26.3374
CG32195	0.342767	25.5381	28.6193
CG7330	0.482609	22.385	24.9756
CheA75a	0.490186	22.3047	24.7107
CG5103	0.549009	22.3183	25.9105
Cyp312a1	0.628586	22.5702	28.8364
CG7430	0.0386736	33.7166	35.3998
CG7441	0.0595979	28.2996	29.7685
CG7408	0.187639	25.8297	27.7382
CG7402	0.44396	23.3529	25.7289
CG14353	0.522083	23.5262	27.0295
CG5290	0.399163	26.1969	30.399
Prestin	0.531722	22.4369	25.635
Tsp74F	0.530544	23.3689	26.7534
CG5506	0.576435	23.823	28.138
CG5535	0.423726	22.6828	24.1521
MED19	0.477439	23.7525	27.5237
CG5567	0.109378	28.311	30.2415
CG5577	0.240982	26.7914	28.7882
CG5589	0.549477	24.0831	28.4742
NUCB1	0.108669	29.0835	31.7872
Oatp74D	0.44038	22.7142	24.8689
CG7564	0.232257	26.3826	29.3394
CG7484	0.0371112	29.0891	29.7922
CG7460	0.331017	25.4469	29.3949
Adgf-A	0.120045	29.8615	31.5931
Crtc	0.376454	22.1831	23.1069
Pep	0.0472643	31.5562	32.6946
Vps60	0.174336	26.8956	29.0353
CycT	0.525755	22.444	25.1956
Jon74E	0.464052	25.0174	30.8089
Edc3	0.284807	26.5159	30.4192
U4-U6-60K	0.195569	27.0722	29.6412
CG7630	0.0334201	29.947	31.2457
CG32176	0.5297	22.7161	25.3497
CG7603	0.0404784	30.7051	32.2043
CG7580	0.0431338	32.7306	34.4573
CG12229	0.237639	21.9742	23.157
CG32174	0.0930672	26.8259	27.8999
CG33052	0.521671	23.8544	28.0531
Sec3	0.257075	25.0031	26.5239
CG13728	0.424128	22.1305	24.191
Cad74A	0.44229	23.9398	27.9027
CG6479	0.591445	23.7007	28.0224
CG6485	0.502719	22.2401	25.8571
CG6512	0.0253744	31.0091	31.7653
CG13028	0.453024	22.1536	24.8987
Nc73EF	0.198598	27.1016	29.5997
CG7728	0.551068	24.2149	28.7759
Fit2	0.427428	24.2609	28.2454
beg	0.141363	27.5802	29.6214
rogdi	0.175001	26.2085	27.8156
CG7724	0.501976	24.1619	28.0746
Rbp6	0.444519	24.2864	28.724
CG14057	0.499915	22.4773	24.3578
a10	0.594009	22.6567	26.204
CG6652	0.506198	22.4238	24.6281
CG6664	0.344205	24.8036	27.4541
CG3764	0.381787	22.1248	23.3746
CG11905	0.607135	25.0907	32.9503
CG11905	0.5778	22.9632	26.3178
CG11905	0.554338	23.2413	26.9444
CG13023	0.595861	26.4065	36.7023
Rpn12	0.0442853	30.95	32.2796
CG4169	0.0375788	34.3711	36.1594
CG32164;CG32165	0.113594	30.4374	33.2155
Dab	0.405246	22.7441	24.1082
CG13031	0.601082	22.8567	28.1848
PGRP-SB2	0.64035	24.3773	30.6614
CG9701	0.353995	25.6182	28.8916
Nrt	0.154725	28.916	31.9784
CG9705	0.161378	28.3404	30.2037
CG9706	0.406871	23.938	26.5778
nudC	0.0288336	30.7046	31.5794
TSG101	0.0366637	28.8151	29.4723
CG9715	0.503018	22.4897	24.9017
sina	0.496286	22.3264	24.379
CG9951	0.300141	24.5445	26.6776
Rh4	0.440642	22.2049	23.9378
CG9674	0.246781	23.2314	24.7215
Int6	0.0676636	31.3099	32.6802
CG13025	0.44911	22.2767	23.6053
Dbp73D	0.32735	25.6107	29.6237
PGRP-SB1	0.228792	27.0499	29.6344
zetaCOP	0.103037	27.4346	28.4666
Baldspot	0.350545	24.8964	27.9648
Abl	0.566902	23.3773	27.2614
Mo25	0.0144768	31.384	32.0289
Su(P)	0.0811715	28.3867	29.5363
Prosbeta6	0.0202588	32.3607	33.0578
CG4098	0.27362	25.651	28.2593
spd-2	0.63509	23.0175	27.8834
Syx8	0.491635	22.3994	25.4323
CG13041;CG13060	0.273169	28.0912	31.3558
CG13059	0.405305	26.2693	30.9387
retinin	0.674339	24.3431	32.9833
CG13056	0.533498	23.9073	27.5338
CG4998	0.522223	24.3969	29.0748
CG33257	0.357543	22.0452	24.6928
mRpS34	0.0376218	29.5747	31.159
CG4933	0.118102	27.432	28.8599
Cpr72Ea	0.589189	26.2195	35.9951
Cpr72Eb	0.667015	23.5894	29.7838
CG4842	0.282516	26.0858	28.3961
RAF2	0.168088	26.2032	27.9776
CG33158	0.148606	27.1602	29.0036
st	0.419891	22.6304	24.8122
mbf1	0.0723981	28.7303	30.1794
Smn	0.443352	25.0724	29.228
Mipp1	0.136693	29.6396	31.7471
dsx-c73A	0.597361	24.7321	31.8882
Aats-tyr	0.0248855	32.406	33.0384
CG4573	0.108954	25.9982	27.0807
fax	0.0521562	32.247	33.6623
CG4729	0.10109	28.6755	30.392
CG4753	0.376044	25.9873	30.1371
roq	0.387962	22.3199	23.3179
Cpr72Ec	0.563045	26.4786	34.9
Pdh	0.626117	25.4586	33.8514
CG4925	0.366199	22.0979	23.5144
CG13040	0.598482	24.5215	31.096
CG13042	0.581701	24.6305	30.5644
ms(3)72Dt	0.40606	25.9276	30.3109
Taf4	0.367353	24.4306	27.0974
CG12272	0.419242	23.0064	24.5364
SsRbeta	0.01679	31.1269	31.4347
CG5027	0.295983	24.1884	26.4712
l(3)72Dp	0.435246	23.4971	26.5261
l(3)72Dr	0.422217	22.8431	24.7403
CG13065	0.640764	23.8765	31.8756
CG4982	0.493098	22.2735	24.6773
CG13044	0.293291	27.8264	31.3413
CG4962	0.424083	26.4759	32.7369
CG13048	0.404902	25.3122	30.1714
CG13049	0.264702	27.5846	31.097
CG13053	0.566205	22.4399	25.7515
PDCD-5	0.165933	26.9985	28.8159
l(3)72Dn	0.429471	25.7148	30.1569
Trs20	0.481218	22.6079	24.685
Pgm	0.0252959	33.2089	34.781
Zn72D	0.0593057	28.3809	29.5509
IntS9	0.449923	24.4364	28.0678
CG5235	0.648795	23.039	28.2382
Taspase1	0.448888	22.6958	24.8421
Diap1	0.449361	23.3712	26.3303
dbo	0.168824	21.9414	22.6374
CG12713	0.520072	23.7158	27.214
GXIVsPLA2	0.464683	22.4275	24.1345
elgi	0.573911	22.6481	25.6111
CG17032	0.473887	23.6194	26.7815
CG17026	0.267054	26.0152	28.2702
CG17029	0.376791	26.1696	30.1881
CG17027	0.280877	25.3956	28.0052
Arl1	0.128898	27.3683	28.5915
mRpS31	0.107318	27.6813	29.6031
mib1	0.454408	22.2455	23.9627
CG5830	0.0429403	28.441	29.0398
DNApol-delta	0.527352	25.5162	31.9576
brm	0.265263	26.7067	30.8017
l(3)72Ab	0.257878	28.2434	31.9489
CG18081;CG15715	0.38134	24.1749	26.8996
DCP2	0.50785	23.1434	25.6884
fwe	0.266963	25.2368	27.8638
CG7275	0.488912	24.483	28.9135
CG7272	0.307636	23.0425	24.5518
Eip71CD	0.0655169	28.677	29.9508
AGO2	0.0256347	29.7268	30.2901
CG7427	0.426788	24.6523	28.3085
dop	0.495126	22.5473	24.5981
CG16979	0.272048	26.1642	28.9422
CG12301	0.341754	25.4467	28.5525
CG12304	0.0399167	30.2667	31.0321
RhoGAP71E	0.449373	23.9738	26.887
CG7372	0.520039	22.3916	24.5271
Eig71Eb	0.659168	24.812	32.8904
Eig71Ed	0.664833	25.0027	33.7854
Eig71Eg	0.677682	24.6012	33.0725
Eig71Ei	0.626382	23.0049	27.1535
Eig71Ek	0.681863	24.1019	31.4392
Eig71Ej	0.689836	24.3042	32.6327
Eig71Ef	0.668846	24.6855	32.6102
Eig71Ee	0.598468	23.7114	29.6859
Eig71Ec	0.662872	24.6212	32.739
Eig71Ea	0.670699	24.5777	32.7709
CG7650	0.56184	22.9781	26.2969
CG7656	0.556659	22.7992	26.1166
mrn	0.583982	23.1362	26.521
CG7739	0.0820996	27.2861	28.3528
CG7945	0.0985967	27.4108	28.4966
CG7857	0.0386554	28.2737	29.1042
Tollo	0.455023	23.7482	27.0083
Toll-6	0.37316	22.2268	23.5139
CG7804	0.545006	23.2807	26.9107
CG5114	0.432731	22.5136	23.9026
mnd	0.239904	23.8895	26.1857
Prosbeta2	0.0252653	31.7697	32.4713
Aats-gly	0.276676	24.2044	26.8778
CG13458	0.558191	22.5295	25.9253
Pex3	0.215107	26.4529	28.5057
Prp31	0.273501	25.7841	28.857
CG6878	0.361454	24.8702	27.851
CG6888	0.616349	23.4169	28.6798
CG7011	0.31546	24.4065	26.6206
Msh6	0.660107	23.9566	30.9284
CG32147	0.322157	24.8959	27.0766
Pdi	0.0284034	35.3594	36.4153
CG12310	0.537866	23.1039	28.3756
Rpn12R	0.569516	22.4687	25.7318
mRpL39	0.0579464	29.9544	30.9878
CG9628	0.405814	22.1059	24.2674
dlp	0.295616	25.1996	27.1904
CG13477	0.42105	22.1155	24.6019
CG13473	0.218198	21.9656	22.8877
Tdrd3	0.14736	26.7896	28.5603
CG9425	0.455639	24.9509	29.3252
CG17839	0.504359	23.4055	26.4193
gnu	0.63148	22.6459	28.288
NHP2	0.0725103	29.9144	31.8537
bmm	0.535724	23.6421	27.395
mop	0.245523	25.7983	29.3222
Trl	0.181819	27.0259	28.6678
CG4914	0.440158	24.6604	28.8525
RecQ5	0.363167	22.9607	24.2725
Mpcp	0.0775315	32.182	34.119
Lk	0.398942	23.7636	26.4528
Gbs-70E	0.186678	21.9466	23.0159
stwl	0.571273	23.113	27.5243
CG7768	0.548821	25.0871	30.5488
CG7924	0.589732	24.2731	29.7498
CG7906	0.646658	24.6798	33.034
D;Sox21a;Sox21b;SoxN	0.408423	22.156	24.2549
Hml	0.285189	27.896	30.9611
Gl	0.053049	29.2887	30.5612
ssp2	0.553574	23.0792	26.4556
Hsc70-1	0.383334	26.6389	31.3201
26-29-p	0.0602922	33.3876	34.8778
upSET	0.509827	22.3388	24.9172
CG6650	0.396959	22.3843	23.5105
CG6661	0.342934	22.0456	23.7499
CG6833	0.51353	22.629	25.173
CG32138	0.407335	23.3211	25.2446
[truncated: 5,953 more rows]
