# Supplementary material for: The developmental proteome of Drosophila melanogaster
Source: HighWire-hosted journal article supplement (doi:10.1101/gr.213694.116), 2017-04-05
Supplement: Supplemental_Tables.zip [file Supplemental_Table_S4.xlsx]

## Sheet: categorical_onlyE_apclusters_ge
protein group	cluster	flybase_gene	stage
FBtr0070328	1	CG4194	embryo
FBtr0072726;FBtr0072725	1	CG9184	embryo
FBtr0074388;FBtr0343763;FBtr0343764;FBtr0111000	1	baz	embryo
FBtr0333042;FBtr0075728;FBtr0333041	1	stwl	embryo
FBtr0077128	1	CG10591	embryo
FBtr0077478	1	ft	embryo
FBtr0078561;FBtr0078563	1	Mes2	embryo
FBtr0332187;FBtr0332186;FBtr0079759	1	CG18088	embryo
FBtr0330191;FBtr0302383;FBtr0081728	1	Zif	embryo
FBtr0082759	1	yellow-e3	embryo
FBtr0085813	1	CG31002	embryo
FBtr0303228;FBtr0085830;FBtr0085828;FBtr0085826	1	ttk	embryo
FBtr0330057;FBtr0086512;FBtr0330058	1	rib	embryo
FBtr0087912	1	CG13159	embryo
FBtr0088804	1	CG14756	embryo
FBtr0089555;FBtr0089554	1	fab1	embryo
FBtr0305186;FBtr0307087;FBtr0110877;FBtr0110876;FBtr0330170;FBtr0307086;FBtr0307083;FBtr0307085;FBtr0307082;FBtr0082533	1	l(3)neo38	embryo
FBtr0307159;FBtr0070445	2	Tsp3A	embryo
FBtr0071198	2	Es2	embryo
FBtr0343013;FBtr0071922	2	robo	embryo
FBtr0343014;FBtr0071924;FBtr0330249	2	Ppa	embryo
FBtr0072040	2	CG30413	embryo
FBtr0333430;FBtr0072842	2	Cnb	embryo
FBtr0072996;FBtr0072995;FBtr0072993;FBtr0113129;FBtr0332113;FBtr0113130;FBtr0072999	2	CG11486	embryo
FBtr0073115;FBtr0073117;FBtr0073116;FBtr0333894;FBtr0113133;FBtr0113132;FBtr0309235	2	CG11537	embryo
FBtr0113430;FBtr0073187;FBtr0332986;FBtr0308639;FBtr0303097;FBtr0308638;FBtr0073188	2	CG32264	embryo
FBtr0073693	2	Brms1	embryo
FBtr0340041;FBtr0300801;FBtr0074116;FBtr0074115;FBtr0074114	2	CG16952	embryo
FBtr0074510;FBtr0339540	2	dik	embryo
FBtr0075844	2	CG14110	embryo
FBtr0075890;FBtr0330075	2	trn	embryo
FBtr0075993	2	CG11560	embryo
FBtr0076821	2	CG7492	embryo
FBtr0077017	2	D19B	embryo
FBtr0334401;FBtr0077429	2	Traf4	embryo
FBtr0077455	2	CG15439	embryo
FBtr0077712	2	Cwc25	embryo
FBtr0078606	2	Osi14	embryo
FBtr0078616	2	CG31559	embryo
FBtr0078928	2	Fip1	embryo
FBtr0079257	2	Fic	embryo
FBtr0302948;FBtr0079418	2	CG4497	embryo
FBtr0308121;FBtr0303884;FBtr0303883;FBtr0079973	2	CG31875	embryo
FBtr0333098;FBtr0333097;FBtr0079993	2	GATAd	embryo
FBtr0080110	2	CG6443	embryo
FBtr0340549;FBtr0080146	2	YL-1	embryo
FBtr0343656;FBtr0080531	2	CG31813	embryo
FBtr0331626;FBtr0080540	2	CG16865	embryo
FBtr0081112;FBtr0342921;FBtr0081111	2	tup	embryo
FBtr0334174;FBtr0081234	2	RanGAP	embryo
FBtr0081249	2	CG33116	embryo
FBtr0081708	2	Osi20	embryo
FBtr0081808;FBtr0300040;FBtr0330188	2	grn	embryo
FBtr0337072;FBtr0081903	2	CG11755	embryo
FBtr0335433;FBtr0082555	2	CG3313	embryo
FBtr0306244;FBtr0083216;FBtr0335423;FBtr0100595;FBtr0083215;FBtr0335424	2	srp	embryo
FBtr0083840	2	trem	embryo
FBtr0085806	2	pygo	embryo
FBtr0303227;FBtr0085829;FBtr0085827;FBtr0085825	2	ttk	embryo
FBtr0086012;FBtr0086010;FBtr0086009;FBtr0086008;FBtr0302439;FBtr0086011	2	EcR	embryo
FBtr0086450;FBtr0330245;FBtr0100390;FBtr0301505;FBtr0330243;FBtr0086457	2	par-1	embryo
FBtr0340022;FBtr0087140	2	CG30100	embryo
FBtr0087144	2	CG4282	embryo
FBtr0304748;FBtr0087247	2	CG8441	embryo
FBtr0088042	2	ADD1	embryo
FBtr0332420;FBtr0088115	2	Vhl	embryo
FBtr0088247	2	CG12343	embryo
FBtr0088312;FBtr0304592;FBtr0088313;FBtr0088311	2	Cyp49a1	embryo
FBtr0088378;FBtr0088377	2	CG12744	embryo
FBtr0088447;FBtr0088446;FBtr0330707;FBtr0088445;FBtr0088444;FBtr0088443;FBtr0330708	2	Mef2	embryo
FBtr0339291;FBtr0088601;FBtr0088603;FBtr0301511;FBtr0339293;FBtr0339292;FBtr0088602;FBtr0088604;FBtr0112897	2	Pkn	embryo
FBtr0089715;FBtr0334554;FBtr0089716;FBtr0089717	2	pnt	embryo
FBtr0091805	2	His1:CG33801	embryo
FBtr0100368	2	Ada2b	embryo
FBtr0344198;FBtr0100501	2	seq	embryo
FBtr0100513	2	Ext2	embryo
FBtr0112376	2	CG34183	embryo
FBtr0333686;FBtr0112576;FBtr0333685;FBtr0114581;FBtr0114582	2	Glut4EF	embryo
FBtr0112893;FBtr0334956;FBtr0334957;FBtr0082959;FBtr0334955	2	stumps	embryo
FBtr0113740;FBtr0113739	2	MED21	embryo
FBtr0332950;FBtr0301636;FBtr0114364;FBtr0114365	2	jing	embryo
FBtr0346438;FBtr0290259	2	not	embryo
FBtr0332323;FBtr0332322;FBtr0300341	2	kon	embryo
FBtr0301611;FBtr0331850	2	smid	embryo
FBtr0303923;FBtr0303924	2	d	embryo
FBtr0304607;FBtr0304605;FBtr0304606;FBtr0304603;FBtr0304608;FBtr0304604	2	pros	embryo
FBtr0305301;FBtr0305302;FBtr0305303	2	pyd	embryo
FBtr0307165;FBtr0307164;FBtr0339696;FBtr0339697	2	CG14446	embryo
FBtr0342803;FBtr0310339;FBtr0310337;FBtr0310336;FBtr0342802;FBtr0330597;FBtr0310338;FBtr0310335	2	CG43658	embryo
FBtr0334134	2	CG44002	embryo
FBtr0345209;FBtr0343141;FBtr0343140;FBtr0343136;FBtr0343135;FBtr0343142;FBtr0343139;FBtr0343138;FBtr0343137	2	CG44774	embryo
FBtr0333184;FBtr0333183;FBtr0070642	3	dgt4	embryo
FBtr0344827;FBtr0070798	3	CG3309	embryo
FBtr0070946;FBtr0070947	3	APC7	embryo
FBtr0071615	3	CG9754	embryo
FBtr0071767	3	CG6758	embryo
FBtr0072237	3	shu	embryo
FBtr0072724	3	msd5	embryo
FBtr0330404;FBtr0074007	3	dah	embryo
FBtr0336977;FBtr0074222	3	CG3679	embryo
FBtr0074372	3	Axs	embryo
FBtr0074387	3	CG5010	embryo
FBtr0075101;FBtr0075112	3	CG7271;term	embryo
FBtr0075124;FBtr0075123	3	CG7341	embryo
FBtr0075363	3	spd-2	embryo
FBtr0300699;FBtr0075873	3	CG11263	embryo
FBtr0304650;FBtr0076075	3	CycA	embryo
FBtr0290104;FBtr0076551;FBtr0076550;FBtr0076549;FBtr0290103	3	smg	embryo
FBtr0076770	3	CG8111	embryo
FBtr0332730;FBtr0302545;FBtr0302544;FBtr0302543;FBtr0076849;FBtr0076848	3	akirin	embryo
FBtr0330185;FBtr0076983	3	zpg	embryo
FBtr0077025	3	CG5568	embryo
FBtr0331571;FBtr0078224	3	CG5199	embryo
FBtr0078559	3	BoYb	embryo
FBtr0078802	3	hd	embryo
FBtr0078859;FBtr0305313	3	rpk	embryo
FBtr0344740;FBtr0078953	3	Skp2	embryo
FBtr0080777;FBtr0080776;FBtr0080775;FBtr0080774;FBtr0080773;FBtr0305561	3	CycE	embryo
FBtr0080886;FBtr0080885;FBtr0080884;FBtr0339514;FBtr0100459	3	grp	embryo
FBtr0273194;FBtr0081095	3	CG10336	embryo
FBtr0081330;FBtr0081329;FBtr0081328;FBtr0306234	3	lok	embryo
FBtr0082969	3	BigH1	embryo
FBtr0082974	3	Rad17	embryo
FBtr0331352;FBtr0083674	3	gwl	embryo
FBtr0321263;FBtr0083707	3	dnk	embryo
FBtr0344665;FBtr0336726;FBtr0085082	3	Tsp97E	embryo
FBtr0336665;FBtr0086147	3	geminin	embryo
FBtr0086899	3	CG30105	embryo
FBtr0344896;FBtr0344895;FBtr0301387;FBtr0087668	3	mars	embryo
FBtr0089349;FBtr0089342;FBtr0089362;FBtr0089346;FBtr0089353;FBtr0089363;FBtr0089348;FBtr0089359;FBtr0089351;FBtr0089366;FBtr0089356;FBtr0089352;FBtr0100286;FBtr0089361;FBtr0089344;FBtr0089364;FBtr0089355	3	lola	embryo
FBtr0089357;FBtr0089347	3	lola	embryo
FBtr0347062;FBtr0089633;FBtr0089632;FBtr0089631	3	mael	embryo
FBtr0346182;FBtr0089702;FBtr0310052	3	cerv	embryo
FBtr0100268	3	Chrac-14	embryo
FBtr0332106;FBtr0289972;FBtr0300711	3	wac	embryo
FBtr0301725;FBtr0299882;FBtr0299881;FBtr0299880	3	AGO3	embryo
FBtr0331562;FBtr0300903	3	CG18586	embryo
FBtr0070258;FBtr0339588	4	mei-38	embryo
FBtr0072704;FBtr0072705;FBtr0333402;FBtr0333401;FBtr0072703	4	CG12090	embryo
FBtr0073205	4	dib	embryo
FBtr0073247;FBtr0073246;FBtr0073245	4	ago	embryo
FBtr0073850	4	Ndc80	embryo
FBtr0074074	4	CG9203	embryo
FBtr0074201	4	CG8944	embryo
FBtr0345341;FBtr0075861	4	CG10222	embryo
FBtr0075969	4	Gcn5	embryo
FBtr0301141;FBtr0076516;FBtr0076515	4	CG5026	embryo
FBtr0330675;FBtr0077843	4	CG10880	embryo
FBtr0078704	4	Atu	embryo
FBtr0343120;FBtr0079184;FBtr0079183	4	CG12393	embryo
FBtr0343419;FBtr0079559	4	CG7102	embryo
FBtr0080264	4	CG14937	embryo
FBtr0080325	4	esc	embryo
FBtr0080427	4	A16	embryo
FBtr0081613;FBtr0334673;FBtr0081612;FBtr0334672;FBtr0334677;FBtr0081614;FBtr0334675;FBtr0334674;FBtr0334676;FBtr0300495;FBtr0300494;FBtr0113200;FBtr0330367	4	Alh	embryo
FBtr0344387;FBtr0082606	4	CG10035	embryo
FBtr0082690	4	Spc25	embryo
FBtr0083010	4	CycC	embryo
FBtr0083223	4	CG5013	embryo
FBtr0083847;FBtr0083848;FBtr0335243	4	mira	embryo
FBtr0084273;FBtr0084276;FBtr0309249;FBtr0084275;FBtr0304669	4	loco	embryo
FBtr0084374;FBtr0084375	4	EloA	embryo
FBtr0112907;FBtr0084527	4	Pli	embryo
FBtr0084546	4	Tsc1	embryo
FBtr0085061	4	IntS12	embryo
FBtr0085355	4	CG1523	embryo
FBtr0085418	4	Slu7	embryo
FBtr0333168;FBtr0086833	4	Smurf	embryo
FBtr0345418;FBtr0345417;FBtr0086922;FBtr0086921	4	CG14478	embryo
FBtr0087233	4	CG30094	embryo
FBtr0087388	4	Pms2	embryo
FBtr0087421;FBtr0332259	4	CG10265	embryo
FBtr0087676	4	link	embryo
FBtr0087904	4	ana3	embryo
FBtr0112407	4	CG34214	embryo
FBtr0333160;FBtr0112653	4	CG34401	embryo
FBtr0333750;FBtr0330105;FBtr0300577;FBtr0112927;FBtr0333811;FBtr0330106	4	Trf2	embryo
FBtr0112947;FBtr0070076	4	CG13373	embryo
FBtr0310148;FBtr0300369;FBtr0339285;FBtr0310147	4	CG13742	embryo
FBtr0331757;FBtr0331758;FBtr0302119;FBtr0302118;FBtr0300995;FBtr0300994	4	CG32767	embryo
FBtr0301426	4	KP78a	embryo
FBtr0303790;FBtr0303788;FBtr0303787;FBtr0334322;FBtr0303789	4	gpp	embryo
FBtr0306040;FBtr0306041	4	nbs	embryo
FBtr0346261;FBtr0071419	5	Yp1	embryo
FBtr0339648;FBtr0071424	5	Yp2	embryo
FBtr0346090;FBtr0073821	5	Yp3	embryo
FBtr0071913;FBtr0309858;FBtr0071911;FBtr0071914	6	CycB	embryo
FBtr0340029;FBtr0072072;FBtr0072073;FBtr0340030;FBtr0340031	6	retn	embryo
FBtr0072733	6	Klp61F	embryo
FBtr0073410	6	feo	embryo
FBtr0073817	6	mus101	embryo
FBtr0073926	6	CG11674	embryo
FBtr0346186;FBtr0340633;FBtr0100463;FBtr0074476	6	CG8188	embryo
FBtr0076647	6	Cdc6	embryo
FBtr0076729	6	RecQ4	embryo
FBtr0077485;FBtr0077484	6	CG31961	embryo
FBtr0079029	6	CG14036	embryo
FBtr0079962	6	Ripalpha	embryo
FBtr0080180	6	aurB	embryo
FBtr0080833	6	fzy	embryo
FBtr0081099	6	Grip71	embryo
FBtr0082434	6	Blm	embryo
FBtr0082483	6	aurA	embryo
FBtr0347147;FBtr0082508	6	Tango9	embryo
FBtr0309996;FBtr0082930;FBtr0082929	6	pr-set7	embryo
FBtr0083408	6	Det	embryo
FBtr0083618;FBtr0083617	6	CG7208	embryo
FBtr0083737	6	CG3773	embryo
FBtr0334502;FBtr0334499;FBtr0301088;FBtr0334501;FBtr0334500;FBtr0084388	6	CG4449	embryo
FBtr0084692	6	asp	embryo
FBtr0344976;FBtr0085534	6	ncd	embryo
FBtr0339999;FBtr0087387	6	dup	embryo
FBtr0087886;FBtr0087885;FBtr0333103	6	muskelin	embryo
FBtr0088959	6	Orc1	embryo
FBtr0336908;FBtr0088961;FBtr0344892	6	Incenp	embryo
FBtr0336864;FBtr0303164	6	Pol32	embryo
FBtr0332204;FBtr0332202;FBtr0332205;FBtr0332203	6	cmet	embryo
FBtr0070207	7	fs(1)N	embryo
FBtr0340093;FBtr0070448	7	Klp3A	embryo
FBtr0070756	7	Cdk7	embryo
FBtr0070892	7	fs(1)M3	embryo
FBtr0071415;FBtr0112971	7	CG2990	embryo
FBtr0346350;FBtr0333306;FBtr0071465	7	Psf3	embryo
FBtr0072425	7	Orc4	embryo
FBtr0072764	7	CG12011	embryo
FBtr0072775	7	CG12018	embryo
FBtr0339625;FBtr0073642	7	Chrac-16	embryo
FBtr0340397;FBtr0073809	7	CG11164	embryo
FBtr0073841	7	Grip91	embryo
FBtr0073898;FBtr0073897	7	yl	embryo
FBtr0073976	7	CG12398	embryo
FBtr0074475	7	CG8173	embryo
FBtr0301308;FBtr0074775;FBtr0343590;FBtr0074777;FBtr0301307;FBtr0074776	7	Grip84	embryo
FBtr0346378;FBtr0335137;FBtr0074809	7	CG12702	embryo
FBtr0075646	7	Msh6	embryo
FBtr0333369;FBtr0076890	7	Cdc27	embryo
FBtr0076984	7	ndl	embryo
FBtr0077081	7	DNApol-epsilon58	embryo
FBtr0077113	7	mad2	embryo
FBtr0344538;FBtr0077116	7	Bre1	embryo
FBtr0077574	7	gkt	embryo
FBtr0078090	7	CG13690	embryo
FBtr0078241	7	DNApol-alpha60	embryo
FBtr0079350	7	CG3430	embryo
FBtr0080165;FBtr0112793	7	aub	embryo
FBtr0340227;FBtr0080166	7	piwi	embryo
FBtr0080213	7	mre11	embryo
FBtr0342580;FBtr0080285	7	dgt2	embryo
FBtr0344019;FBtr0344018;FBtr0309281;FBtr0080630	7	spel1	embryo
FBtr0081335;FBtr0081334	7	nesd	embryo
FBtr0081758	7	lds	embryo
FBtr0083580	7	CG14309	embryo
FBtr0084115	7	DNApol-alpha180	embryo
FBtr0084377	7	Cdc16	embryo
FBtr0084408	7	DNApol-epsilon255	embryo
FBtr0084740	7	polybromo	embryo
FBtr0085096;FBtr0085095	7	ball	embryo
FBtr0085417	7	Cul5	embryo
FBtr0085452	7	Cap-D2	embryo
FBtr0085777	7	Zwilch	embryo
FBtr0085795	7	rod	embryo
FBtr0085845	7	Acf1	embryo
FBtr0086032	7	BubR1	embryo
FBtr0086277	7	CG11788	embryo
FBtr0111010;FBtr0086484;FBtr0086483;FBtr0330248	7	hrg	embryo
FBtr0087461	7	SMC2	embryo
FBtr0100654;FBtr0309893;FBtr0309892;FBtr0087704;FBtr0100656;FBtr0087703;FBtr0309889;FBtr0309891	7	cnn	embryo
FBtr0087769;FBtr0087768	7	lat	embryo
FBtr0339638;FBtr0087948	7	dgt5	embryo
FBtr0088482	7	Orc6	embryo
FBtr0114543	7	DNApol-alpha73	embryo
FBtr0300084;FBtr0300083;FBtr0300082;FBtr0300081;FBtr0300080	7	wech	embryo
FBtr0301415;FBtr0340625;FBtr0301414;FBtr0301413	7	l(1)G0222	embryo
FBtr0332472;FBtr0304854	7	vas	embryo
FBtr0305178	7	clos	embryo
FBtr0070234	8	png	embryo
FBtr0070670	8	Xpac	embryo
FBtr0345745;FBtr0070749	8	dhd	embryo
FBtr0070922	8	swa	embryo
FBtr0071146;FBtr0309795;FBtr0071145;FBtr0071147;FBtr0309796;FBtr0310269	8	dec-1	embryo
FBtr0071201	8	Cp7Fb	embryo
FBtr0071203	8	Cp36	embryo
FBtr0342742;FBtr0342743;FBtr0073573	8	wisp	embryo
FBtr0340358;FBtr0334461;FBtr0074385;FBtr0074384;FBtr0334460	8	CG4991	embryo
FBtr0076880	8	CG14834	embryo
FBtr0340362;FBtr0077326	8	Obp19c	embryo
FBtr0077662;FBtr0329906;FBtr0077664;FBtr0335389;FBtr0335388;FBtr0110903;FBtr0077663;FBtr0329907;FBtr0077665;FBtr0112883	8	toc	embryo
FBtr0080804;FBtr0080803;FBtr0080805	8	BicC	embryo
FBtr0081131	8	tos	embryo
FBtr0081956;FBtr0081954	8	osk	embryo
FBtr0082661;FBtr0082660	8	Men	embryo
FBtr0084279	8	CG33107	embryo
FBtr0334867;FBtr0085397	8	stg	embryo
FBtr0306235;FBtr0085956;FBtr0085957;FBtr0306236;FBtr0085958	8	CG17018	embryo
FBtr0345392;FBtr0087359;FBtr0340003	8	CG8180	embryo
FBtr0344861;FBtr0344860;FBtr0331674;FBtr0300183;FBtr0114550	8	pes	embryo
FBtr0346452;FBtr0290322	8	cup	embryo
FBtr0302907;FBtr0300000;FBtr0343357;FBtr0300001;FBtr0302906;FBtr0302905	8	CG42388	embryo
FBtr0300277;FBtr0300276	8	CG6967	embryo
FBtr0343564;FBtr0070122;FBtr0308651	9	Roc1a	embryo
FBtr0070182	9	CDC45L	embryo
FBtr0346648;FBtr0345315;FBtr0300793;FBtr0070412	9	CG2924	embryo
FBtr0345713;FBtr0305182;FBtr0305181;FBtr0300931;FBtr0070643;FBtr0305185;FBtr0305184;FBtr0305183;FBtr0305180;FBtr0305179;FBtr0301124	9	tyf	embryo
FBtr0343574;FBtr0070656	9	mei-9	embryo
FBtr0070899	9	CG3815	embryo
FBtr0071228	9	Caf1-180	embryo
FBtr0071758	9	CG6613	embryo
FBtr0072070;FBtr0072069;FBtr0072067;FBtr0072066;FBtr0332926;FBtr0072068	9	apt	embryo
FBtr0072156	9	mr	embryo
FBtr0072678	9	msd1	embryo
FBtr0073227	9	pav	embryo
FBtr0074602	9	fu	embryo
FBtr0074826;FBtr0074825;FBtr0332693	9	Su(var)3-3	embryo
FBtr0333599;FBtr0075497	9	CG5235	embryo
FBtr0075970;FBtr0332643	9	sti	embryo
FBtr0076061	9	Grip163	embryo
FBtr0273338;FBtr0076279;FBtr0334067	9	E(z)	embryo
FBtr0334100;FBtr0076292	9	Gem3	embryo
FBtr0333887;FBtr0076570	9	CG6511	embryo
FBtr0076757;FBtr0076755;FBtr0076754;FBtr0333223;FBtr0076759;FBtr0076758;FBtr0076756	9	nmo	embryo
FBtr0076772;FBtr0076771;FBtr0112817;FBtr0076774;FBtr0076773;FBtr0306647	9	pbl	embryo
FBtr0077541	9	cutlet	embryo
FBtr0332407;FBtr0077594	9	CG9662	embryo
FBtr0077616;FBtr0332372	9	Mad	embryo
FBtr0344088;FBtr0335478;FBtr0077653	9	CG17260	embryo
FBtr0078074	9	Ipk2	embryo
FBtr0331529;FBtr0331528;FBtr0078272	9	CG3634	embryo
FBtr0078712	9	MED27	embryo
FBtr0333227;FBtr0079238	9	psd	embryo
FBtr0333349;FBtr0079319	9	Nse1	embryo
FBtr0079598	9	CG7840	embryo
FBtr0080033	9	Grip75	embryo
FBtr0080543	9	Orc5	embryo
FBtr0080763	9	Ku80	embryo
FBtr0080979	9	CG15141	embryo
FBtr0344846;FBtr0081160;FBtr0081159;FBtr0081158;FBtr0336627	9	brat	embryo
FBtr0081401;FBtr0081399	9	Cen	embryo
FBtr0301657;FBtr0082736	9	Su(var)3-7	embryo
FBtr0082866	9	Orc2	embryo
FBtr0083183	9	spn-E	embryo
FBtr0084493	9	CG13599	embryo
FBtr0084552	9	Apc2	embryo
FBtr0084604	9	BRWD3	embryo
FBtr0085175	9	l(3)mbt	embryo
FBtr0085409	9	Slbp	embryo
FBtr0085414	9	dgt6	embryo
FBtr0086083;FBtr0335258;FBtr0086082	9	d4	embryo
FBtr0086268	9	CG13427	embryo
FBtr0340277;FBtr0086881	9	sub	embryo
FBtr0087448	9	Ercc1	embryo
FBtr0088255	9	Mat1	embryo
FBtr0088310	9	Caf1-105	embryo
FBtr0088395	9	CG12129	embryo
FBtr0088789	9	Gasz	embryo
FBtr0088877;FBtr0088876	9	Sep5	embryo
FBtr0088912;FBtr0088911	9	scra	embryo
FBtr0336918;FBtr0088983;FBtr0300830	9	CG1620	embryo
FBtr0089479;FBtr0089478;FBtr0331561	9	nxf2	embryo
FBtr0339819;FBtr0303415;FBtr0089712;FBtr0339820	9	CG1677	embryo
FBtr0307518;FBtr0089714;FBtr0089713	9	elg1	embryo
FBtr0110874	9	tefu	embryo
FBtr0112456	9	CG34261	embryo
FBtr0112777	9	egg	embryo
FBtr0344622;FBtr0344621;FBtr0301976;FBtr0301975;FBtr0114464	9	CG33096	embryo
FBtr0273414	9	dgt3	embryo
FBtr0290069;FBtr0343571;FBtr0074276	9	hang	embryo
FBtr0299507;FBtr0301325	9	Cap-G	embryo
FBtr0333455;FBtr0301600;FBtr0333456;FBtr0301601	9	SMC5	embryo
FBtr0308122;FBtr0303882	9	SoYb	embryo
FBtr0334512;FBtr0306257;FBtr0334511;FBtr0306256;FBtr0334510	9	CG7518	embryo
FBtr0340488;FBtr0340489	9	sno	embryo
FBtr0073621	10	CG15735	embryo
FBtr0100318;FBtr0074839	10	polo	embryo
FBtr0075522	10	DNApol-delta	embryo
FBtr0076393	10	alphaTub67C	embryo
FBtr0079975;FBtr0079976	10	me31B	embryo
FBtr0332572;FBtr0081228	10	gammaTub37C	embryo
FBtr0083508	10	Pxt	embryo
FBtr0084153	10	fit	embryo
FBtr0086252	10	rig	embryo
FBtr0273238	10	CG18190	embryo
FBtr0070117;FBtr0070118;FBtr0070116	11	CG17829	embryo
FBtr0344156;FBtr0070330	11	CG4061	embryo
FBtr0345711;FBtr0070613	11	CG2941	embryo
FBtr0071129	11	l(1)G0193	embryo
FBtr0332626;FBtr0071218	11	CG12081	embryo
FBtr0071515;FBtr0332465;FBtr0113368;FBtr0342794	11	Ipk1	embryo
FBtr0301243;FBtr0071827	11	Mes4	embryo
FBtr0345653;FBtr0100130;FBtr0071953	11	twi	embryo
FBtr0072810	11	CG17249	embryo
FBtr0072871;FBtr0072872	11	CG8960	embryo
FBtr0346538;FBtr0073286	11	Claspin	embryo
FBtr0304987;FBtr0113143;FBtr0113142;FBtr0073310	11	CG11357	embryo
FBtr0074075	11	Grip128	embryo
FBtr0074130	11	CG8924	embryo
FBtr0310519;FBtr0074342	11	CG4880	embryo
FBtr0074596	11	CG15047	embryo
FBtr0345014;FBtr0074808;FBtr0074807	11	vfl	embryo
FBtr0074946	11	CG9376	embryo
FBtr0075053	11	CG6885	embryo
FBtr0075057;FBtr0075056	11	HipHop	embryo
FBtr0075108	11	bora	embryo
FBtr0344230;FBtr0075333;FBtr0075332	11	sina	embryo
FBtr0075428	11	CG4925	embryo
FBtr0075570	11	CG7372	embryo
FBtr0075723;FBtr0333037;FBtr0075724	11	Gbs-70E	embryo
FBtr0333025;FBtr0075786;FBtr0075785	11	CG8783	embryo
FBtr0332634;FBtr0075957	11	CG10681	embryo
FBtr0076365;FBtr0076364;FBtr0076363	11	iPLA2-VIA	embryo
FBtr0076689	11	mus301	embryo
FBtr0077125	11	Sse	embryo
FBtr0346640;FBtr0077130	11	spo	embryo
FBtr0077319	11	Tak1	embryo
FBtr0339501;FBtr0100651;FBtr0077352;FBtr0339500;FBtr0100652;FBtr0100650;FBtr0077353;FBtr0310475	11	Cp110	embryo
FBtr0345632;FBtr0077441	11	CG15435	embryo
FBtr0335134;FBtr0077450	11	CG15443	embryo
FBtr0331372;FBtr0077603	11	CG3326	embryo
FBtr0344854;FBtr0077746	11	insv	embryo
FBtr0077876	11	CG14352	embryo
FBtr0078255;FBtr0321284	11	Spc105R	embryo
FBtr0343989;FBtr0343988;FBtr0078720	11	CG1239	embryo
FBtr0078743	11	asl	embryo
FBtr0346455;FBtr0342934;FBtr0079069	11	Bub1	embryo
FBtr0079424	11	Nuf2	embryo
FBtr0079432	11	wg	embryo
FBtr0079929;FBtr0329984	11	bib	embryo
FBtr0080135	11	CG7384	embryo
FBtr0080571	11	tam	embryo
FBtr0336820;FBtr0081224	11	dnt	embryo
FBtr0081246	11	Top3alpha	embryo
FBtr0343860;FBtr0081261	11	scw	embryo
FBtr0332246;FBtr0081317;FBtr0081316	11	fs(2)ltoPP43	embryo
FBtr0081488	11	CG8679	embryo
FBtr0082002;FBtr0300414;FBtr0082001;FBtr0082004;FBtr0082003	11	neur	embryo
FBtr0082012	11	E(var)3-9	embryo
FBtr0082222	11	CG12420	embryo
FBtr0334695;FBtr0083082;FBtr0330039	11	ear	embryo
FBtr0083484	11	CG31251	embryo
FBtr0083541	11	CG14317	embryo
FBtr0304658;FBtr0083740;FBtr0083739	11	Dl	embryo
FBtr0301589;FBtr0301588;FBtr0084020;FBtr0301585;FBtr0112916;FBtr0112915;FBtr0301587;FBtr0301586;FBtr0110939;FBtr0110938;FBtr0084022;FBtr0084021;FBtr0084024	11	SNF4Agamma	embryo
FBtr0084323	11	vret	embryo
FBtr0337011;FBtr0084718	11	Trf4-2	embryo
FBtr0330289;FBtr0084803;FBtr0330288	11	dan	embryo
FBtr0085543;FBtr0330297	11	CG7609	embryo
FBtr0334702;FBtr0290030;FBtr0334703;FBtr0085554;FBtr0085555;FBtr0085553	11	Axn	embryo
FBtr0346862;FBtr0085557	11	Sry-alpha	embryo
FBtr0086094	11	CG10465	embryo
FBtr0331977;FBtr0086570	11	Topors	embryo
FBtr0332852;FBtr0086750	11	nopo	embryo
FBtr0087014	11	tef	embryo
FBtr0087189	11	krimp	embryo
FBtr0087562	11	tej	embryo
FBtr0087856;FBtr0087855	11	sca	embryo
FBtr0303037;FBtr0088004	11	Sr-CII	embryo
FBtr0088316;FBtr0329868;FBtr0329867	11	CG11825	embryo
FBtr0304926;FBtr0088423	11	dmpd	embryo
FBtr0345799;FBtr0088999;FBtr0088998	11	CG11141	embryo
FBtr0346516;FBtr0334082;FBtr0091757	11	gdl	embryo
FBtr0100063	11	CG34008	embryo
FBtr0334157;FBtr0111126	11	cta	embryo
FBtr0112365	11	CG34174	embryo
FBtr0273304;FBtr0301145;FBtr0273306;FBtr0273305	11	CG6091	embryo
FBtr0273368;FBtr0273367	11	CG7504	embryo
FBtr0290083	11	CG34025	embryo
FBtr0339299;FBtr0300661;FBtr0300660	11	CG42516	embryo
FBtr0300919;FBtr0300921;FBtr0300920;FBtr0088381	11	CG30007	embryo
FBtr0301296	11	slx1	embryo
FBtr0303288	11	CG14414	embryo
FBtr0345987;FBtr0303457	11	GIIIspla2	embryo
FBtr0332963;FBtr0303709;FBtr0303710;FBtr0303708	11	CG42797	embryo
FBtr0310385	11	Su(var)3-9	embryo
FBtr0344116;FBtr0078639;FBtr0078638	11	dgrn	embryo
FBtr0070100	1	pcl	larva
FBtr0072638	1	Trh	larva
FBtr0072837;FBtr0072836	1	Tmhs	larva
FBtr0072879	1	CG13806	larva
FBtr0073670	1	CG15731	larva
FBtr0075008	1	pip	larva
FBtr0075469	1	CG4982	larva
FBtr0303093;FBtr0075854;FBtr0075853	1	CG10154;CG10140	larva
FBtr0077218	1	CG10918	larva
FBtr0077584	1	CG33281	larva
FBtr0340589;FBtr0077609;FBtr0077608;FBtr0344796	1	CG3332	larva
FBtr0078350;FBtr0078349;FBtr0078348;FBtr0330156	1	Aef1	larva
FBtr0079061	1	Cyp28d2	larva
FBtr0079285	1	CG13983	larva
FBtr0346906;FBtr0079595	1	CG14277	larva
FBtr0340261;FBtr0300289;FBtr0079754	1	Tsp29Fa	larva
FBtr0331665;FBtr0079991;FBtr0079990;FBtr0079989	1	CG4995	larva
FBtr0080754	1	CG7631	larva
FBtr0081045	1	CG15153	larva
FBtr0081605	1	CG10055	larva
FBtr0081712	1	CG18048	larva
FBtr0082202	1	Npc2d	larva
FBtr0082617	1	Cyp313a3	larva
FBtr0083406	1	CG5255	larva
FBtr0084026	1	CG5810	larva
FBtr0084281	1	CG5278	larva
FBtr0303849;FBtr0321262;FBtr0084596	1	Miro	larva
FBtr0085679	1	CG9717	larva
FBtr0086237	1	CG13438	larva
FBtr0345873;FBtr0344876;FBtr0087405	1	Cyp317a1	larva
FBtr0087539	1	beta4GalNAcTA	larva
FBtr0087905	1	CG30047	larva
FBtr0087996	1	CG13170	larva
FBtr0088561;FBtr0088562;FBtr0088560	1	CG8083	larva
FBtr0088591	1	Cyp4p2	larva
FBtr0089630	1	CG10910	larva
FBtr0332871;FBtr0100678	1	CG32269	larva
FBtr0273369	1	Npc2e	larva
FBtr0333562;FBtr0290260	1	CG4950	larva
FBtr0340279;FBtr0301142	1	Dhit	larva
FBtr0307535;FBtr0302522	1	CG31371	larva
FBtr0334011;FBtr0302896	1	CG42694	larva
FBtr0310452	1	CG43677	larva
FBtr0333039;FBtr0333038	1	CG4613	larva
FBtr0333613	1	CG4835	larva
FBtr0342791	1	CG15225	larva
FBtr0072355	2	CG4563	larva
FBtr0076925	2	CG8629	larva
FBtr0082625	2	CG4830	larva
FBtr0308495;FBtr0086520;FBtr0086519	2	CG11961	larva
FBtr0089055	2	Cyp9b2	larva
FBtr0070554	3	CG14421	larva
FBtr0070556	3	CG14423	larva
FBtr0070563	3	CG14424	larva
FBtr0071486	3	CG2962	larva
FBtr0308057;FBtr0076159;FBtr0076150;FBtr0076149;FBtr0076148;FBtr0076094	3	CG33269;CG33272;CG33271;CG33270;CG33500	larva
FBtr0076854	3	CG8562	larva
FBtr0077059;FBtr0077058	3	Lcp65Ag2;Lcp65Ag1	larva
FBtr0078584	3	Obp83cd	larva
FBtr0078764;FBtr0078765	3	CG31547	larva
FBtr0078976	3	TwdlV	larva
FBtr0345335;FBtr0079055	3	Jon25Bii	larva
FBtr0343130;FBtr0299810;FBtr0112945;FBtr0079218;FBtr0079217	3	slmo	larva
FBtr0079475;FBtr0079473;FBtr0079476;FBtr0079474	3	Myo28B1	larva
FBtr0340242;FBtr0302160;FBtr0079704;FBtr0079703	3	fu12	larva
FBtr0079751	3	CG9289	larva
FBtr0080140	3	CG17134	larva
FBtr0085035	3	TwdlD	larva
FBtr0085036	3	Tb	larva
FBtr0085078	3	CG6296	larva
FBtr0085712	3	Cyp4c3	larva
FBtr0345582;FBtr0086804	3	CG5084	larva
FBtr0087907	3	CG30043	larva
FBtr0071341	4	CG12115	larva
FBtr0076666	4	Jon66Cii	larva
FBtr0078196	4	mag	larva
FBtr0340230;FBtr0079744	4	CG9463	larva
FBtr0080549	4	CG7916	larva
FBtr0080551	4	CG7968	larva
FBtr0343671;FBtr0080563	4	CG8997	larva
FBtr0081831	4	CG31463	larva
FBtr0300622;FBtr0082527;FBtr0113391;FBtr0301023;FBtr0082526;FBtr0082528	4	ClC-a	larva
FBtr0084441	4	CG31148	larva
FBtr0085151	4	CG6283	larva
FBtr0086957;FBtr0340212;FBtr0340211;FBtr0086955	4	mthl4;mthl3	larva
FBtr0100006	4	CG33965	larva
FBtr0300902	4	CG18563	larva
FBtr0343561;FBtr0343563;FBtr0343562;FBtr0073495;FBtr0073496	4	Gs2	larva
FBtr0344211	4	CG42335	larva
FBtr0070251	5	CG11384	larva
FBtr0070550	5	CG32793	larva
FBtr0070552	5	CG3598	larva
FBtr0070555	5	CG14422	larva
FBtr0070815	5	Cpr5C	larva
FBtr0071542	5	Cht9	larva
FBtr0073102	5	CG33160	larva
FBtr0304579;FBtr0073868	5	CG12480	larva
FBtr0074730	5	CG14205	larva
FBtr0332695;FBtr0074856	5	CG7017	larva
FBtr0075012	5	pip	larva
FBtr0076145	5	CG33268	larva
FBtr0307047;FBtr0303935;FBtr0077878;FBtr0077877;FBtr0303934;FBtr0303933	5	chinmo	larva
FBtr0345804;FBtr0078411;FBtr0332860;FBtr0078410	5	CG12974	larva
FBtr0078541;FBtr0078520	5	CG12546;CG14452	larva
FBtr0346145;FBtr0336709;FBtr0078982	5	TwdlG	larva
FBtr0082353	5	CG14701	larva
FBtr0083415	5	TwdlW	larva
FBtr0083889;FBtr0083888	5	CG4288	larva
FBtr0084285	5	CG5326	larva
FBtr0085049	5	TwdlQ	larva
FBtr0085057	5	TwdlB	larva
FBtr0085172	5	CG3348	larva
FBtr0086561	5	CG10474	larva
FBtr0086752	5	CG14500	larva
FBtr0332918;FBtr0087522	5	CG18327	larva
FBtr0087882;FBtr0087881	5	CG8785	larva
FBtr0087911;FBtr0332250	5	CG13160	larva
FBtr0112395	5	CG34202	larva
FBtr0301151	5	CG7179	larva
FBtr0303268	5	CG15740	larva
FBtr0339245;FBtr0339244;FBtr0304161	5	Rootletin	larva
FBtr0308027	5	Ugt86Dg	larva
FBtr0346168;FBtr0071403	6	CG3106	larva
FBtr0073985	6	CG9521	larva
FBtr0074325	6	TwdlX	larva
FBtr0332724;FBtr0076852	6	CG8563	larva
FBtr0346527;FBtr0077067	6	Jon65Ai	larva
FBtr0078098	6	CG11911	larva
FBtr0078975	6	TwdlF	larva
FBtr0345615;FBtr0331635;FBtr0079894	6	CG5853	larva
FBtr0331620;FBtr0080909	6	Ugt36Ba	larva
FBtr0084048	6	CG10827	larva
FBtr0085029	6	TwdlM	larva
FBtr0085031	6	TwdlN	larva
FBtr0085058	6	TwdlP	larva
FBtr0086143	6	Tdc1	larva
FBtr0086708	6	CG5335	larva
FBtr0087955	6	Cpr49Ad	larva
FBtr0088520	6	CG1809	larva
FBtr0308247;FBtr0089150;FBtr0089149;FBtr0089148;FBtr0089147;FBtr0089146	6	CG2316	larva
FBtr0307094;FBtr0112921;FBtr0307095	6	CG17636	larva
FBtr0114538	6	TwdlJ	larva
FBtr0072315	7	CG3548	larva
FBtr0072335	7	CG4781	larva
FBtr0075069	7	CG6839	larva
FBtr0310461;FBtr0075431	7	CG13040	larva
FBtr0076608	7	Jon66Ci	larva
FBtr0076862	7	CG8541	larva
FBtr0076863	7	CG8543	larva
FBtr0345590;FBtr0076913	7	CG15829	larva
FBtr0079713	7	Peritrophin-15a	larva
FBtr0343666;FBtr0080550	7	CG7953	larva
FBtr0080587	7	Cyp28a5	larva
FBtr0345635;FBtr0081376	7	CG17571	larva
FBtr0346149;FBtr0083417	7	CG17475	larva
FBtr0083658	7	Vha100-4	larva
FBtr0085644	7	CG15534	larva
FBtr0086521	7	CG10051	larva
FBtr0345527;FBtr0087451	7	Cyp6a17	larva
FBtr0088160	7	epsilonTry	larva
FBtr0088760;FBtr0331956	7	Cyp4ad1	larva
FBtr0308605;FBtr0308604;FBtr0074272	7	CG4301	larva
FBtr0070428	8	Cyp4d1	larva
FBtr0070878	8	Btd	larva
FBtr0071035;FBtr0071034	8	Inx7	larva
FBtr0072631	8	LysS	larva
FBtr0073938	8	Ag5r2	larva
FBtr0074329	8	Twdlalpha	larva
FBtr0333710;FBtr0075048	8	CG3819	larva
FBtr0077042	8	Jon65Aii	larva
FBtr0077506	8	CG15423	larva
FBtr0077958	8	MFS3	larva
FBtr0079056	8	Jon25Biii	larva
FBtr0309842;FBtr0079766	8	CG13102	larva
FBtr0080564	8	CG33306	larva
FBtr0080782	8	CG15253	larva
FBtr0081544	8	alpha-Est1	larva
FBtr0081546	8	alpha-Est4	larva
FBtr0081695	8	Ccp84Af	larva
FBtr0082821	8	Adgf-C	larva
FBtr0083797;FBtr0083798	8	CG11659;CG6300	larva
FBtr0085626	8	CG15533	larva
FBtr0085670	8	PH4alphaPV	larva
FBtr0086514	8	CG18607	larva
FBtr0340068;FBtr0340067;FBtr0087114;FBtr0087115	8	Picot	larva
FBtr0273255	8	CG18747	larva
FBtr0299513	8	CG42249	larva
FBtr0303413	8	CG4053	larva
FBtr0332249	8	CG33012	larva
FBtr0344149;FBtr0342962;FBtr0070068;FBtr0070067;FBtr0070066	1	CG3777	pupa
FBtr0343491;FBtr0072334	1	Cpr60D	pupa
FBtr0072430	1	Lcp9	pupa
FBtr0346275;FBtr0073531	1	CG2444	pupa
FBtr0075320	1	PGRP-SB2	pupa
FBtr0303460;FBtr0075571	1	Eig71Eb	pupa
FBtr0075584	1	Eig71Ef	pupa
FBtr0075586	1	Eig71Ec	pupa
FBtr0075587	1	Eig71Ea	pupa
FBtr0075741;FBtr0321257	1	CG7906	pupa
FBtr0076095	1	Sgs7	pupa
FBtr0076096	1	Sgs3	pupa
FBtr0076160	1	Sgs8	pupa
FBtr0076495	1	Hsp67Ba	pupa
FBtr0333057;FBtr0076606	1	ImpE1	pupa
FBtr0078463	1	Cpr78E	pupa
FBtr0079388	1	Pcp	pupa
FBtr0079934	1	obst-B	pupa
FBtr0336850;FBtr0080129	1	CG7296	pupa
FBtr0083441	1	CG33333	pupa
FBtr0083460	1	CG7587	pupa
FBtr0333033;FBtr0112438	1	CG34244	pupa
FBtr0305668;FBtr0305667	1	tnc	pupa
FBtr0339259	1	CG11854	pupa
FBtr0344457;FBtr0344456	1	CG45081	pupa
FBtr0070200	2	CG14626	pupa
FBtr0070204	2	CG14624	pupa
FBtr0332293;FBtr0300428;FBtr0300427;FBtr0070263;FBtr0070261;FBtr0330406	2	br	pupa
FBtr0333115;FBtr0070270	2	hfw	pupa
FBtr0333754;FBtr0070377;FBtr0070376;FBtr0333755	2	Unc-76	pupa
FBtr0071580;FBtr0071579	2	Pu	pupa
FBtr0345496;FBtr0071861	2	nsr	pupa
FBtr0343282;FBtr0072158;FBtr0072157	2	Sox14	pupa
FBtr0334081;FBtr0072802	2	CG13931	pupa
FBtr0308313;FBtr0308312;FBtr0073052;FBtr0308311	2	CG12017	pupa
FBtr0073080	2	Drsl6	pupa
FBtr0073653;FBtr0333157	2	Cpr11B	pupa
FBtr0074666	2	CG7453	pupa
FBtr0075261	2	CG13028	pupa
FBtr0075378	2	CG33257	pupa
FBtr0333563;FBtr0075480	2	CG13053	pupa
FBtr0075866	2	CG14107	pupa
FBtr0075870	2	CG14118	pupa
FBtr0076410	2	CG6749	pupa
FBtr0333866;FBtr0076469	2	CG32037	pupa
FBtr0076995	2	Lcp65Aa	pupa
FBtr0077434;FBtr0290071	2	CG33003	pupa
FBtr0332768;FBtr0078453	2	CG14566	pupa
FBtr0078588	2	Osi1	pupa
FBtr0078598	2	Osi8	pupa
FBtr0078614	2	Osi11	pupa
FBtr0079513	2	Tep2	pupa
FBtr0333417;FBtr0079687;FBtr0079686	2	CG17834	pupa
FBtr0080214	2	Osi21	pupa
FBtr0080336	2	CG17211	pupa
FBtr0343812;FBtr0080828	2	Cyp303a1	pupa
FBtr0331621;FBtr0080914	2	CG13272	pupa
FBtr0081371	2	CG16798	pupa
FBtr0082101	2	Fst	pupa
FBtr0082335	2	CG14695	pupa
FBtr0082738	2	Osi22	pupa
FBtr0344008;FBtr0083250	2	Sb	pupa
FBtr0083321;FBtr0083320	2	CG14880	pupa
FBtr0083900	2	CG4362	pupa
FBtr0083913	2	CG5466	pupa
FBtr0084234	2	CG13857	pupa
FBtr0084242	2	CG5391	pupa
FBtr0084525	2	tbrd-1	pupa
FBtr0084729	2	CG13641	pupa
FBtr0084940	2	MCO3	pupa
FBtr0339716;FBtr0085459	2	CG18731	pupa
FBtr0086687;FBtr0301149;FBtr0086689	2	CG5174	pupa
FBtr0086986	2	Gbp	pupa
FBtr0345427;FBtr0087477	2	mspo	pupa
FBtr0087513	2	CG30076	pupa
FBtr0087720	2	CG10814	pupa
FBtr0087872	2	Obp49a	pupa
FBtr0087953	2	CG13154	pupa
FBtr0088462;FBtr0088459;FBtr0088457;FBtr0088456;FBtr0088455	2	CG1516	pupa
FBtr0334807;FBtr0334808;FBtr0088501	2	Mmp2	pupa
FBtr0089077;FBtr0089076;FBtr0089075	2	Ephrin	pupa
FBtr0089708	2	MESK2	pupa
FBtr0100281	2	CG12481	pupa
FBtr0100496;FBtr0100495	2	CG13430	pupa
FBtr0110982	2	CG17672	pupa
FBtr0310633;FBtr0113135;FBtr0310636;FBtr0073268;FBtr0310635;FBtr0073267	2	ens	pupa
FBtr0113257	2	hdly	pupa
FBtr0114112;FBtr0114111;FBtr0302581;FBtr0302582	2	CG41520	pupa
FBtr0273261;FBtr0310544	2	dsb	pupa
FBtr0289963	2	CG13046	pupa
FBtr0299607;FBtr0331540;FBtr0299606;FBtr0331537;FBtr0331541;FBtr0301858	2	CG42268	pupa
FBtr0299624;FBtr0299623	2	RhoGAP18B	pupa
FBtr0299740;FBtr0299741	2	CG42319	pupa
FBtr0345476;FBtr0299834	2	CG34221	pupa
FBtr0340051;FBtr0300673	2	CG17707	pupa
FBtr0304664;FBtr0304663;FBtr0301933;FBtr0304665;FBtr0304666	2	Cad86C	pupa
FBtr0304934;FBtr0304933;FBtr0302699;FBtr0302697;FBtr0302696;FBtr0339906;FBtr0330283;FBtr0302700;FBtr0302698;FBtr0345849;FBtr0339907	2	CG42671	pupa
FBtr0303994	2	CG12163	pupa
FBtr0305342;FBtr0305343;FBtr0336972	2	CG5921	pupa
FBtr0306280;FBtr0306281	2	CG43229	pupa
FBtr0332363;FBtr0306392;FBtr0306391;FBtr0332360;FBtr0332365;FBtr0332367;FBtr0332366;FBtr0332364	2	CG8086	pupa
FBtr0306824;FBtr0306823	2	CG43294	pupa
FBtr0308294;FBtr0308292	2	CG4702	pupa
FBtr0310205	2	pyd	pupa
FBtr0330097;FBtr0076399;FBtr0076398;FBtr0076401;FBtr0076400	2	vsg	pupa
FBtr0331952	2	CG43340	pupa
FBtr0333588	2	CG13720	pupa
FBtr0334503	2	CG11790	pupa
FBtr0335000	2	CG1161	pupa
FBtr0347156;FBtr0347155	2	CG15358	pupa
FBtr0345506;FBtr0070201	3	CG11380	pupa
FBtr0070202	3	CG14625	pupa
FBtr0342728;FBtr0070205	3	CG11382	pupa
FBtr0070213	3	CG14770	pupa
FBtr0342730;FBtr0070238	3	CG11409	pupa
FBtr0070871;FBtr0308190	3	CG5928	pupa
FBtr0072744	3	CG12003	pupa
FBtr0308314;FBtr0073053	3	CG12009	pupa
FBtr0074933	3	Cpr76Bb	pupa
FBtr0075003	3	pip	pupa
FBtr0076601	3	Cpr66Cb	pupa
FBtr0076662	3	CG32354	pupa
FBtr0331628;FBtr0077647	3	CG17264	pupa
FBtr0078548	3	CG13239	pupa
FBtr0310414;FBtr0078594	3	Osi3	pupa
FBtr0078602	3	Osi12	pupa
FBtr0079563	3	TwdlE	pupa
FBtr0345746;FBtr0080066	3	CG13138	pupa
FBtr0081860;FBtr0306794	3	CG11693	pupa
FBtr0083741	3	CG5217	pupa
FBtr0345272;FBtr0339137;FBtr0084313	3	CG7031	pupa
FBtr0084687;FBtr0084686;FBtr0339251	3	CG13627	pupa
FBtr0085456	3	CG15506	pupa
FBtr0085719	3	CG15545	pupa
FBtr0087628	3	CG6280	pupa
FBtr0087629	3	Cpr50Ca	pupa
FBtr0345800;FBtr0088963	3	CG12164	pupa
FBtr0332687;FBtr0332685;FBtr0332686;FBtr0112620	3	CG34382	pupa
FBtr0332754;FBtr0113180	3	Cpr76Bc	pupa
FBtr0273301	3	CG6026	pupa
FBtr0340002;FBtr0273307	3	CG12964	pupa
FBtr0273384;FBtr0273385;FBtr0339307	3	CG8213	pupa
FBtr0290198	3	CG13358	pupa
FBtr0299564;FBtr0331702	3	CG14257	pupa
FBtr0339829;FBtr0300034;FBtr0300035;FBtr0308847;FBtr0300032;FBtr0339827;FBtr0300033;FBtr0339828	3	CG4678	pupa
FBtr0303875;FBtr0300213	3	CG33299	pupa
FBtr0300222;FBtr0300221	3	CG42449	pupa
FBtr0300552	3	CG15615	pupa
FBtr0343166;FBtr0301569	3	CG15322	pupa
FBtr0337045;FBtr0301711	3	CG13847	pupa
FBtr0303391	3	CG42763	pupa
FBtr0307593;FBtr0307592	3	CG43386	pupa
FBtr0332988;FBtr0308207;FBtr0332989	3	CG13376	pupa
FBtr0308568	3	CG14218	pupa
FBtr0332380	3	CG14052	pupa
FBtr0340682;FBtr0071390	4	CG9689	pupa
FBtr0071469	4	CG32679	pupa
FBtr0071481	4	CG12643	pupa
FBtr0071743	4	CG4386	pupa
FBtr0072370	4	spz6	pupa
FBtr0072637	4	LysX	pupa
FBtr0073081	4	Drsl1	pupa
FBtr0073783	4	CG15756	pupa
FBtr0113173;FBtr0075304;FBtr0075301	4	CG11905	pupa
FBtr0332123;FBtr0075574	4	Eig71Ei	pupa
FBtr0076304	4	CG32055	pupa
FBtr0076732;FBtr0332761	4	CG13676	pupa
FBtr0078618	4	Obp83ef	pupa
FBtr0305964;FBtr0078847;FBtr0335404;FBtr0305963	4	CG2016	pupa
FBtr0343382;FBtr0079532	4	Sirup	pupa
FBtr0344063;FBtr0305574;FBtr0079551	4	CG7227	pupa
FBtr0331624;FBtr0080929	4	CG13282	pupa
FBtr0081136	4	CG15169	pupa
FBtr0081251	4	CG13082	pupa
FBtr0343772;FBtr0081252	4	CG13081	pupa
FBtr0081534	4	CG14598	pupa
FBtr0083222	4	CG10264	pupa
FBtr0084224	4	CG13856	pupa
FBtr0344701;FBtr0084421;FBtr0084423;FBtr0339621;FBtr0084422	4	CG10175	pupa
FBtr0085810	4	lox	pupa
FBtr0340021;FBtr0301751;FBtr0087223	4	Jhe	pupa
FBtr0088656	4	CG13748	pupa
FBtr0307883;FBtr0112560	4	Np	pupa
FBtr0290243	4	NimC3	pupa
FBtr0301001	4	CG42537	pupa
FBtr0302999	4	CG42717	pupa
FBtr0336983;FBtr0303023	4	CG15905	pupa
FBtr0303466	4	CG14244	pupa
FBtr0303831	4	CG42823	pupa
FBtr0304644;FBtr0304643	4	CG43060	pupa
FBtr0305334	4	Eig71Eh	pupa
FBtr0307369;FBtr0307375;FBtr0307370;FBtr0307371	4	Cht6	pupa
FBtr0345786;FBtr0070779	5	CG4151	pupa
FBtr0345787;FBtr0070791	5	CG32762	pupa
FBtr0073141	5	ImpE2	pupa
FBtr0074659;FBtr0074658;FBtr0074657;FBtr0074656	5	bnb	pupa
FBtr0345805;FBtr0075307	5	CG13023	pupa
FBtr0075382	5	Cpr72Ea	pupa
FBtr0075572	5	Eig71Ed	pupa
FBtr0333581;FBtr0076990	5	Lcp65Ad	pupa
FBtr0076994;FBtr0076992	5	Lcp65Ab1;Lcp65Ab2	pupa
FBtr0077376;FBtr0100560	5	CG3355	pupa
FBtr0345750;FBtr0079154	5	CG9021	pupa
FBtr0083461	5	Sgs5	pupa
FBtr0085698	5	Spn100A	pupa
FBtr0087514	5	Cpr51A	pupa
FBtr0087916;FBtr0345948;FBtr0339631;FBtr0087917;FBtr0339630	5	Cpr49Ac	pupa
FBtr0333554;FBtr0088743	5	Lcp3	pupa
FBtr0333555;FBtr0088744	5	Lcp4	pupa
FBtr0333556;FBtr0088761;FBtr0333557;FBtr0088763	5	Lcp2;Lcp1	pupa
FBtr0089022	5	CG1850	pupa
FBtr0089041	5	Spn43Aa	pupa
FBtr0303003	5	CG32249	pupa
FBtr0071534	6	Cht8	pupa
FBtr0071744	6	CG18735	pupa
FBtr0073164	6	CG10853	pupa
FBtr0307187;FBtr0073438	6	CG15202	pupa
FBtr0073799	6	CG32631	pupa
FBtr0113174;FBtr0075305;FBtr0075300;FBtr0305577	6	CG11905	pupa
FBtr0075383	6	Cpr72Eb	pupa
FBtr0075409	6	dsx-c73A	pupa
FBtr0075573	6	Eig71Eg	pupa
FBtr0075575	6	Eig71Ek	pupa
FBtr0075582	6	Eig71Ej	pupa
FBtr0306793;FBtr0076065	6	CG11570	pupa
FBtr0344634;FBtr0078408	6	Edg78E	pupa
FBtr0340577;FBtr0340576;FBtr0340575;FBtr0081037;FBtr0081036;FBtr0081035	6	CG5758	pupa
FBtr0081688	6	Edg84A	pupa
FBtr0085486;FBtr0085485	6	neo	pupa
FBtr0346230;FBtr0085790	6	mey	pupa
FBtr0086963	6	CG30101	pupa
FBtr0087638	6	CG6357	pupa
FBtr0088799	6	CG30375	pupa
FBtr0100053	6	CG33998	pupa
FBtr0100373	6	CG14062	pupa
FBtr0100559;FBtr0100558	6	Hsp22	pupa
FBtr0112441	6	CG34247	pupa
FBtr0112476	6	CG34280	pupa
FBtr0114535	6	CG4382	pupa
FBtr0290122	6	CG11192	pupa
FBtr0300876;FBtr0300875	6	nyo	pupa
FBtr0302990;FBtr0080560	6	CG16886	pupa
FBtr0340258;FBtr0302995	6	CG42713	pupa
FBtr0307307	6	CG43366	pupa
FBtr0332298;FBtr0331736;FBtr0332297;FBtr0073785	6	CG11816	pupa
FBtr0334402;FBtr0334403	6	Mur89F	pupa
FBtr0334931	6	CG44090	pupa
FBtr0346170;FBtr0336923;FBtr0307489;FBtr0071386	7	CG32698	pupa
FBtr0071489;FBtr0308583;FBtr0308584;FBtr0308582	7	ZAP3	pupa
FBtr0071612	7	CG9822	pupa
FBtr0071904	7	CG3700	pupa
FBtr0072968	7	CG16762	pupa
FBtr0073494	7	Gs2	pupa
FBtr0340296;FBtr0073509	7	PGRP-SA	pupa
FBtr0343602;FBtr0073750	7	CG12715	pupa
FBtr0073782	7	CG15754	pupa
FBtr0075585	7	Eig71Ee	pupa
FBtr0075665	7	CG12310	pupa
FBtr0076004	7	Est-P	pupa
FBtr0346581;FBtr0077545	7	CG3604	pupa
FBtr0333212;FBtr0100184;FBtr0078582;FBtr0304985;FBtr0330076;FBtr0333213;FBtr0333211	7	jim	pupa
FBtr0345779;FBtr0079606	7	CG7778	pupa
FBtr0336851;FBtr0080130	7	CG7299	pupa
FBtr0080758;FBtr0080756	7	CG31780;CG18477	pupa
FBtr0082825	7	CG9312	pupa
FBtr0083405	7	CG5246	pupa
FBtr0085217	7	CG12880	pupa
FBtr0089116	7	CG1674	pupa
FBtr0100058	7	NimB3	pupa
FBtr0345622;FBtr0112386	7	CG34193	pupa
FBtr0112399	7	CG34206	pupa
FBtr0112487	7	CG34291	pupa
FBtr0343241;FBtr0300294	7	CG42460	pupa
FBtr0300612	7	CG4793	pupa
FBtr0301313	7	Zasp52	pupa
FBtr0302305	7	CG15597	pupa
FBtr0303005	7	CG11349	pupa
FBtr0303006	7	CG32241	pupa
FBtr0333122;FBtr0304976	7	CG43085	pupa
FBtr0310412	7	ImpE3	pupa
FBtr0310502	7	CG8642	pupa
FBtr0331400	7	CG13722	pupa
FBtr0342741	7	Muc11A	pupa
FBtr0346736	7	Sgs4	pupa
FBtr0273206;FBtr0071706;FBtr0342893;FBtr0342894;FBtr0342892;FBtr0071707;FBtr0342895	8	Sdc	pupa
FBtr0332839;FBtr0332838;FBtr0072506;FBtr0332837;FBtr0332836	8	miple2	pupa
FBtr0073784	8	Cpr12A	pupa
FBtr0074568;FBtr0074569	8	CG32548	pupa
FBtr0075050	8	GNBP1	pupa
FBtr0075740	8	CG7924	pupa
FBtr0077056	8	Lcp65Ae	pupa
FBtr0077062;FBtr0346812;FBtr0346811	8	l(3)mbn	pupa
FBtr0344143;FBtr0077612	8	CG31698	pupa
FBtr0343865;FBtr0079324	8	CG31636	pupa
FBtr0080588;FBtr0343689;FBtr0080589	8	NimC2	pupa
FBtr0082507;FBtr0335438	8	CG10005	pupa
FBtr0334155;FBtr0082510;FBtr0334156;FBtr0113223	8	CG12213	pupa
FBtr0082565	8	CG17738	pupa
FBtr0083353	8	modSP	pupa
FBtr0337059;FBtr0083369;FBtr0083367	8	MESK4;CG31274	pupa
FBtr0337060;FBtr0083371	8	Irc	pupa
FBtr0083446	8	CG14332	pupa
FBtr0339164;FBtr0084340	8	CG17244	pupa
FBtr0085103	8	CG14258	pupa
FBtr0345652;FBtr0087921	8	Cpr49Af	pupa
FBtr0087935	8	CG8550	pupa
FBtr0088189	8	Cpr47Ec	pupa
FBtr0112420	8	CG34227	pupa
FBtr0112501	8	CG34305	pupa
FBtr0305650;FBtr0299571	8	CG42259	pupa
FBtr0299969	8	CG42370	pupa
FBtr0302379	8	CG5999	pupa
FBtr0332163;FBtr0303731	8	CG42798	pupa
FBtr0303768;FBtr0303767	8	CG6762	pupa
FBtr0303853	8	CG42834	pupa
FBtr0310156	8	CG7320	pupa
FBtr0336819	8	fon	pupa
FBtr0070203	1	CG11381	adult
FBtr0343517;FBtr0070284;FBtr0303587	1	Mur2B	adult
FBtr0070663	1	Femcoat	adult
FBtr0345745;FBtr0070749	1	dhd	adult
FBtr0071146;FBtr0309795;FBtr0071145;FBtr0071147;FBtr0309796;FBtr0310269	1	dec-1	adult
FBtr0071201	1	Cp7Fb	adult
FBtr0071203	1	Cp36	adult
FBtr0300448;FBtr0071204	1	Cp38	adult
FBtr0071989	1	CG9897	adult
FBtr0072902	1	yellow-g	adult
FBtr0075697	1	gnu	adult
FBtr0076196	1	Fad2	adult
FBtr0076571	1	Cp18	adult
FBtr0076572	1	Cp15	adult
FBtr0076573	1	Cp19	adult
FBtr0076574	1	Cp16	adult
FBtr0076613	1	mtrm	adult
FBtr0076880	1	CG14834	adult
FBtr0340362;FBtr0077326	1	Obp19c	adult
FBtr0077804	1	Send1	adult
FBtr0333232;FBtr0079239	1	Vm26Aa	adult
FBtr0343618;FBtr0080216	1	Vm32E	adult
FBtr0080350	1	CG31862	adult
FBtr0081240	1	CG13084	adult
FBtr0081242	1	CG13083	adult
FBtr0100003	1	Cp7Fa	adult
FBtr0347302;FBtr0112535	1	Vml	adult
FBtr0273329	1	CG13114	adult
FBtr0346452;FBtr0290322	1	cup	adult
FBtr0302954	1	CG42704	adult
FBtr0304829	1	CG43074	adult
FBtr0304876	1	CG43090	adult
FBtr0337062;FBtr0305130	1	CG4009	adult
FBtr0070955	2	CG4095	adult
FBtr0333174;FBtr0072454	2	Peb	adult
FBtr0072943	2	Acp62F	adult
FBtr0074843	2	Spn77Bb	adult
FBtr0308781;FBtr0075038	2	Acp76A	adult
FBtr0075871	2	CG10749	adult
FBtr0334099;FBtr0334098;FBtr0076286	2	S-Lap3	adult
FBtr0076288	2	S-Lap4	adult
FBtr0076523	2	CG5144	adult
FBtr0076638	2	S-Lap1	adult
FBtr0076639	2	S-Lap2	adult
FBtr0077561	2	CG3213	adult
FBtr0078000	2	Hsp60B	adult
FBtr0079155	2	Acp26Aa	adult
FBtr0079624	2	Spn28F	adult
FBtr0339543;FBtr0079731	2	CG9314	adult
FBtr0079816	2	lectin-30A	adult
FBtr0080101	2	CG17097	adult
FBtr0332030;FBtr0080184	2	Porin2	adult
FBtr0340581;FBtr0081054	2	Acp36DE	adult
FBtr0081382	2	CG17472	adult
FBtr0081450;FBtr0339567	2	Spn38F	adult
FBtr0082336	2	CG4706	adult
FBtr0082552	2	CG14740	adult
FBtr0347003;FBtr0082604;FBtr0347002;FBtr0082603	2	CG10096	adult
FBtr0083769	2	CG6255	adult
FBtr0083826;FBtr0273258;FBtr0083827;FBtr0083828;FBtr0273259	2	CG4836	adult
FBtr0084382	2	CG4434	adult
FBtr0084475	2	CG10252	adult
FBtr0084611	2	CG33340	adult
FBtr0085277;FBtr0085278	2	Mst98Ca;Mst98Cb	adult
FBtr0085599	2	ocn	adult
FBtr0087080	2	Acp53Ea	adult
FBtr0345493;FBtr0087081	2	Acp53C14b	adult
FBtr0345494;FBtr0087082	2	Acp53C14a	adult
FBtr0087087	2	S-Lap8	adult
FBtr0113086;FBtr0087092	2	loopin-1	adult
FBtr0087107	2	CG5089	adult
FBtr0087624	2	S-Lap5	adult
FBtr0332255;FBtr0087649	2	S-Lap7	adult
FBtr0088476	2	lectin-46Ca	adult
FBtr0304045;FBtr0100106	2	CG34051	adult
FBtr0300297	2	Sfp24Bb	adult
FBtr0300319	2	Sfp87B	adult
FBtr0301706	2	lectin-46Cb	adult
FBtr0070504	3	CG2650	adult
FBtr0342954;FBtr0071659	3	CG15674	adult
FBtr0073069	3	CG14961	adult
FBtr0075468	3	CG13065	adult
FBtr0079831	3	Cpr30B	adult
FBtr0085389	3	CG14515	adult
FBtr0331984;FBtr0086972	3	CG9640	adult
FBtr0345312;FBtr0301665	3	Try29F	adult
FBtr0071740	4	CG4363	adult
FBtr0071782	4	CG3290	adult
FBtr0345580;FBtr0072455	4	PebII	adult
FBtr0073061	4	Drsl4	adult
FBtr0075290	4	a10	adult
FBtr0076387	4	CG8329	adult
FBtr0077440	4	CG15434	adult
FBtr0077792;FBtr0330667	4	CG3597	adult
FBtr0077986	4	Iris	adult
FBtr0078655	4	Obp83b	adult
FBtr0078908	4	CG14645	adult
FBtr0333415;FBtr0079684	4	CG13091	adult
FBtr0345611;FBtr0080464	4	CG16826	adult
FBtr0082154	4	CG16904	adult
FBtr0334927;FBtr0302143;FBtr0083030	4	Mf	adult
FBtr0083330	4	CG17560	adult
FBtr0083736	4	cry	adult
FBtr0083790	4	CG11407	adult
FBtr0084821	4	CG11878	adult
FBtr0085988	4	CG8343	adult
FBtr0086214	4	GNBP-like3	adult
FBtr0086294	4	Obp57a	adult
FBtr0086633;FBtr0340492;FBtr0086632	4	CG15096	adult
FBtr0086903	4	CG6484	adult
FBtr0339757;FBtr0303099;FBtr0087656;FBtr0087654	4	IM10;CG33470	adult
FBtr0087854	4	CG12374	adult
FBtr0088073	4	Tret1-1	adult
FBtr0088380	4	CG30008	adult
FBtr0088752	4	Mal-A8	adult
FBtr0345489;FBtr0088757	4	Mal-A7	adult
FBtr0347004;FBtr0344386;FBtr0100525	4	CG10097	adult
FBtr0112526	4	CG34324	adult
FBtr0336853	4	CG44195	adult
FBtr0310165;FBtr0070164	5	CG11663	adult
FBtr0301475;FBtr0070651;FBtr0070650	5	norpA	adult
FBtr0308348;FBtr0070764	5	CanB	adult
FBtr0071055	5	CheA7a	adult
FBtr0071150	5	CG10920	adult
FBtr0071202	5	Cp7Fc	adult
FBtr0071600;FBtr0310327;FBtr0300395;FBtr0071599;FBtr0300394	5	CG9485	adult
FBtr0071627	5	CG4286	adult
FBtr0071745	5	lox2	adult
FBtr0071760	5	CG30281	adult
FBtr0343000;FBtr0343001;FBtr0071854	5	CG4269	adult
FBtr0072121	5	CG3906	adult
FBtr0072161	5	CG3121	adult
FBtr0332655;FBtr0072695	5	robl62A	adult
FBtr0072766	5	CG12035	adult
FBtr0332084;FBtr0072979	5	CG2113	adult
FBtr0073367	5	CG7514	adult
FBtr0073394	5	CG1537	adult
FBtr0074937;FBtr0074936	5	Rcd7	adult
FBtr0075129	5	CheA75a	adult
FBtr0075226	5	CG12229	adult
FBtr0075338	5	Rh4	adult
FBtr0075689	5	CG13473	adult
FBtr0076394	5	CG16719	adult
FBtr0076671;FBtr0333058	5	Idh	adult
FBtr0076824	5	CG7716	adult
FBtr0076937	5	CG10064	adult
FBtr0077064	5	CG10469	adult
FBtr0345919;FBtr0077242	5	Mgstl	adult
FBtr0332513;FBtr0077699	5	Prosbeta4R2	adult
FBtr0077740	5	CG9961	adult
FBtr0343845;FBtr0077948	5	CG5556	adult
FBtr0078127	5	CG3345	adult
FBtr0078266	5	CG10589	adult
FBtr0333372;FBtr0078268	5	CG32432	adult
FBtr0339891;FBtr0078333;FBtr0333286	5	CG10587	adult
FBtr0078415	5	CG9389	adult
FBtr0334901;FBtr0334900;FBtr0078875	5	CG14657	adult
FBtr0079201	5	CG9222	adult
FBtr0079438	5	gudu	adult
FBtr0079557	5	Spn28Db	adult
FBtr0079604	5	CG14274	adult
FBtr0335506;FBtr0079928;FBtr0079926;FBtr0303909;FBtr0303908	5	Nckx30C	adult
FBtr0342583;FBtr0080137;FBtr0342584;FBtr0080138	5	CG31870	adult
FBtr0345613;FBtr0080387	5	CG5435	adult
FBtr0080437	5	CG5458	adult
FBtr0080440	5	Pect	adult
FBtr0345616;FBtr0080496	5	CG9928	adult
FBtr0080518;FBtr0080517	5	Hsp60D	adult
FBtr0080681;FBtr0345434;FBtr0080682	5	Mst35Bb;Mst35Ba	adult
FBtr0080784	5	Semp1	adult
FBtr0080868	5	CG31816	adult
FBtr0340177;FBtr0080960	5	CG32832	adult
FBtr0346480;FBtr0081302	5	CG16772	adult
FBtr0334889;FBtr0081604	5	CG1288	adult
FBtr0082405	5	CG6723	adult
FBtr0082566	5	CG4066	adult
FBtr0082976	5	CG7886	adult
FBtr0306246;FBtr0083029	5	CG6752	adult
FBtr0083173	5	CG9589	adult
FBtr0344646;FBtr0083623	5	CG7218	adult
FBtr0083876	5	Rh3	adult
FBtr0083978;FBtr0335016;FBtr0335015	5	CG5621	adult
FBtr0083985	5	TotX	adult
FBtr0346111;FBtr0084043	5	CG7079	adult
FBtr0084330	5	CG4907	adult
FBtr0084698	5	CG6980	adult
FBtr0084949	5	boss	adult
FBtr0085361	5	CG11841	adult
FBtr0085680	5	Rpt6R	adult
FBtr0085685	5	PH4alphaNE2	adult
FBtr0302828;FBtr0302827;FBtr0086026;FBtr0086025	5	CG14591	adult
FBtr0086481	5	CG15128	adult
FBtr0300844;FBtr0086728	5	CG15067	adult
FBtr0087043	5	CG6421	adult
FBtr0087199	5	CG30093	adult
FBtr0087956	5	CG13155	adult
FBtr0336733;FBtr0088175	5	CG18336	adult
FBtr0305905;FBtr0088357;FBtr0088356	5	CG12902	adult
FBtr0088798	5	CG30371	adult
FBtr0301867;FBtr0301868;FBtr0100601	5	Menl-2	adult
FBtr0345121;FBtr0110859;FBtr0085655	5	CG15539	adult
FBtr0111152	5	CG40470	adult
FBtr0112494	5	CG34298	adult
FBtr0344305;FBtr0112531	5	Diedel3	adult
FBtr0113202	5	CG17816	adult
FBtr0113686;FBtr0113685	5	klhl10	adult
FBtr0113768;FBtr0301132;FBtr0301133;FBtr0340199;FBtr0113769;FBtr0340198	5	zyd	adult
FBtr0114546	5	CG7140	adult
FBtr0273346;FBtr0306641;FBtr0273345	5	SelR	adult
FBtr0299543	5	CG13404	adult
FBtr0309797;FBtr0299821	5	CG14077	adult
FBtr0306386;FBtr0343617;FBtr0300115;FBtr0310279;FBtr0310280	5	Ca-beta	adult
FBtr0300192	5	CG6145	adult
FBtr0300302	5	Sfp24C1	adult
FBtr0345495;FBtr0300312	5	Sfp53D	adult
FBtr0300817	5	CG31189	adult
FBtr0301184	5	CG7309	adult
FBtr0301378;FBtr0301379;FBtr0335419;FBtr0335416;FBtr0335420;FBtr0343789;FBtr0343790;FBtr0335421;FBtr0335417;FBtr0335418;FBtr0343788	5	GluClalpha	adult
FBtr0301672	5	CG12516	adult
FBtr0301977	5	CG31077	adult
FBtr0302766;FBtr0336697;FBtr0345078;FBtr0345077;FBtr0302770	5	CG42678	adult
FBtr0302785;FBtr0302787	5	Lmpt	adult
FBtr0303840	5	CG11600	adult
FBtr0307171;FBtr0343621;FBtr0304586	5	CG16854	adult
FBtr0306683	5	CG8757	adult
FBtr0307276;FBtr0307275	5	Rtnl2	adult
FBtr0308842;FBtr0308841	5	l(2)01289	adult
FBtr0310094;FBtr0299832;FBtr0299833;FBtr0310097;FBtr0310093;FBtr0301443;FBtr0310096;FBtr0310095	5	KCNQ	adult
FBtr0310568;FBtr0310565;FBtr0310564;FBtr0310567;FBtr0310566;FBtr0310569;FBtr0310563	5	CG43693	adult
FBtr0331168;FBtr0331167;FBtr0346834	5	CG42265	adult
FBtr0333004	5	Pdk	adult
FBtr0334852;FBtr0334854;FBtr0334855;FBtr0334859;FBtr0334858;FBtr0334861;FBtr0334856;FBtr0334853;FBtr0334860;FBtr0334857	5	CG44085	adult
FBtr0342613	5	CG44574	adult
FBtr0343848	5	CG10730	adult
FBtr0344210	5	CG2528	adult
FBtr0346692	5	JYalpha	adult
FBtr0346712	5	Mhc	adult
FBtr0070057;FBtr0070053;FBtr0070050;FBtr0345920;FBtr0070056;FBtr0070054;FBtr0070051	6	CG17450;CG32820;CG32819	adult
FBtr0340478;FBtr0070755	6	TrxT	adult
FBtr0331726;FBtr0071232	6	CG12111	adult
FBtr0310056;FBtr0113371;FBtr0071528;FBtr0301898;FBtr0342839;FBtr0310057;FBtr0113369;FBtr0071527;FBtr0301902;FBtr0301894;FBtr0301901;FBtr0301896	6	RIC-3	adult
FBtr0310344;FBtr0071963	6	CG3085	adult
FBtr0303465;FBtr0071995	6	CG3788	adult
FBtr0072293	6	CG3483	adult
FBtr0072657;FBtr0072655	6	CG9130	adult
FBtr0333963;FBtr0073426;FBtr0073425	6	Ant2	adult
FBtr0074192	6	Efhc1.1	adult
FBtr0344973;FBtr0074648	6	CG7349	adult
FBtr0075132	6	CG5103	adult
FBtr0332863;FBtr0075135	6	Cyp312a1	adult
FBtr0076069	6	CG5718	adult
FBtr0331828;FBtr0076177	6	CG6140	adult
FBtr0076683	6	fan	adult
FBtr0331522;FBtr0331521;FBtr0077115	6	Tektin-C	adult
FBtr0077171	6	CG4669	adult
FBtr0077722	6	CG2964	adult
FBtr0077917	6	CG10869	adult
FBtr0305553;FBtr0077925;FBtr0077924	6	Cdlc2	adult
FBtr0078425	6	CG32445	adult
FBtr0078819	6	CG31538	adult
FBtr0345445;FBtr0079377;FBtr0309814;FBtr0309815	6	CG17377	adult
FBtr0079481	6	CG7211	adult
FBtr0079760	6	CG18662	adult
FBtr0080670	6	CG4691	adult
FBtr0331277;FBtr0080788	6	Tektin-A	adult
FBtr0081010	6	CG31803	adult
FBtr0081058	6	CG31802	adult
FBtr0081198	6	CG17349	adult
FBtr0339731;FBtr0081591	6	CG10029	adult
FBtr0334682;FBtr0082142	6	CG8526	adult
FBtr0346098;FBtr0082362;FBtr0082351	6	scpr-C;scpr-B	adult
FBtr0082514	6	CG6971	adult
FBtr0309093;FBtr0082795	6	CG10841	adult
FBtr0082838	6	Ubc87F	adult
FBtr0344379;FBtr0083167	6	CG4520	adult
FBtr0083407	6	CG5265	adult
FBtr0083597	6	CG7131	adult
FBtr0083770	6	CG3517	adult
FBtr0334587;FBtr0083891	6	Dic2	adult
FBtr0084948	6	CG14540	adult
FBtr0306708;FBtr0085006	6	CG5432	adult
FBtr0085011	6	Hex-t2	adult
FBtr0085170	6	CG3330	adult
FBtr0085598	6	janB	adult
FBtr0085994	6	tomboy40	adult
FBtr0335260;FBtr0086089	6	CG10396	adult
FBtr0087067	6	CG9010	adult
FBtr0087126	6	CG7813	adult
FBtr0087481	6	CG12861	adult
FBtr0087819;FBtr0302939	6	CG17575	adult
FBtr0088766;FBtr0088765	6	CG2127	adult
FBtr0088800	6	CG30376	adult
FBtr0089674	6	sut4	adult
FBtr0100647;FBtr0100646;FBtr0100645	6	CG9133	adult
FBtr0110770	6	BG642167	adult
FBtr0300056	6	TTLL3B	adult
FBtr0301808;FBtr0301807	6	ARY	adult
FBtr0304702	6	CG18233	adult
FBtr0305567	6	CG7311	adult
FBtr0346772	6	kl-5	adult
FBtr0072215	7	Ca-P60A	adult
FBtr0074177	7	sun	adult
FBtr0340616;FBtr0074393	7	CG5162	adult
FBtr0074949	7	Gbeta76C	adult
FBtr0075375	7	retinin	adult
FBtr0333383;FBtr0076003	7	Est-6	adult
FBtr0076452	7	CG4461	adult
FBtr0076599	7	Arr2	adult
FBtr0076623	7	se	adult
FBtr0076810	7	CG7409	adult
FBtr0077021	7	Acp65Aa	adult
FBtr0077304;FBtr0077303	7	Obp19d	adult
FBtr0077657;FBtr0335386	7	v(2)k05816	adult
FBtr0078825	7	rtp	adult
FBtr0303876;FBtr0079802;FBtr0079801;FBtr0079800	7	Eaat1	adult
FBtr0334754;FBtr0080450	7	CG5945	adult
FBtr0307350;FBtr0081030;FBtr0340229	7	Arr1	adult
FBtr0339720;FBtr0081790	7	CG7910	adult
FBtr0083080	7	Tm2	adult
FBtr0083857	7	ninaE	adult
FBtr0084847	7	tobi	adult
FBtr0085195	7	Mlc1	adult
FBtr0310003;FBtr0086102	7	TpnC41C	adult
FBtr0087914	7	Cpr49Ab	adult
FBtr0088190	7	Cpr47Ea	adult
FBtr0088759	7	Mal-A1	adult
FBtr0089669;FBtr0089671;FBtr0089668;FBtr0089670	7	SIP2	adult
FBtr0100388;FBtr0342711;FBtr0329911;FBtr0310087	7	Zasp52	adult
FBtr0331650;FBtr0330663;FBtr0308188;FBtr0112363	7	CG34172	adult
FBtr0113359	7	Cpr49Aa	adult
FBtr0345347;FBtr0299542	7	CG13026	adult
FBtr0302661;FBtr0302664;FBtr0302663;FBtr0302662;FBtr0302665;FBtr0302660;FBtr0333602;FBtr0333601;FBtr0344165;FBtr0344166	7	rdgA	adult
FBtr0070099	8	Cyp4g1	adult
FBtr0073252	8	Cpr64Ac	adult
FBtr0073254	8	Cpr64Aa	adult
FBtr0332723;FBtr0074910	8	fln	adult
FBtr0114536;FBtr0075426;FBtr0114537;FBtr0075427	8	Pdh	adult
FBtr0334090;FBtr0078478	8	Act79B	adult
FBtr0330100;FBtr0335410;FBtr0335411;FBtr0085778;FBtr0330101	8	chp	adult
FBtr0302019;FBtr0086075	8	TpnC4	adult
FBtr0087920	8	Cpr49Ae	adult
FBtr0112398	8	CG34205	adult
FBtr0336648	8	Strn-Mlck	adult
FBtr0346805;FBtr0073182	9	Acp63F	adult
FBtr0074392	9	CG18258	adult
FBtr0075116;FBtr0075115	9	Met75Cb;Met75Ca	adult
FBtr0076136	9	CG6071	adult
FBtr0335162;FBtr0077803	9	CG17242	adult
FBtr0301010;FBtr0077943	9	CG31659	adult
FBtr0331816;FBtr0078172	9	Spn77Bc	adult
FBtr0078334	9	CG11037	adult
FBtr0342618;FBtr0079157;FBtr0079156	9	Acp26Ab	adult
FBtr0079715	9	lectin-29Ca	adult
FBtr0079716	9	Acp29AB	adult
FBtr0079829	9	CG31883	adult
FBtr0080094	9	CG18301	adult
FBtr0345637;FBtr0080099	9	CG31872	adult
FBtr0081383	9	CG31680	adult
FBtr0082954	9	Cyp313a1	adult
FBtr0083432	9	CG31418	adult
FBtr0084149	9	CG6690	adult
FBtr0084442	9	CG31413	adult
FBtr0085213	9	CG5402	adult
FBtr0085313	9	aqrs	adult
FBtr0336789;FBtr0085314	9	CG9997	adult
FBtr0086342;FBtr0086343	9	Obp56g	adult
FBtr0087420	9	Obp51a	adult
FBtr0087480	9	CG12860	adult
FBtr0087818;FBtr0306584	9	antr	adult
FBtr0088740	9	CG8701	adult
FBtr0303024;FBtr0091496	9	Acp53C14c	adult
FBtr0346457;FBtr0110769	9	BG642163	adult
FBtr0110771	9	Spn75F	adult
FBtr0346459;FBtr0110802	9	CG14034	adult
FBtr0110871	9	CG34130	adult
FBtr0300226	9	CG30395	adult
FBtr0304639;FBtr0300304	9	Sfp24F	adult
FBtr0300310	9	Sfp33A3	adult
FBtr0300407	9	CG34034	adult
FBtr0339130;FBtr0300805	9	CG18284	adult
FBtr0301268	9	CG42564	adult
FBtr0333233;FBtr0301935	9	Sfp26Ad	adult
FBtr0301939;FBtr0333971	9	Sfp78E	adult
FBtr0302155	9	CG34002	adult
FBtr0304888	9	CG43101	adult
FBtr0309516	9	CG31419	adult
FBtr0310472;FBtr0310471	9	CG42789	adult
FBtr0331961	9	CG43788	adult
FBtr0335172;FBtr0335171	9	CG15394	adult
FBtr0339163	9	Mst57Dc	adult
FBtr0070069	10	CG12470	adult
FBtr0070712	10	CG7024	adult
FBtr0070926	10	CG15892	adult
FBtr0071739	10	CG4377	adult
FBtr0071990	10	CG32833	adult
FBtr0072322	10	CG3640	adult
FBtr0072653	10	CG9129	adult
FBtr0072692	10	CG9168	adult
FBtr0074364	10	CG9676	adult
FBtr0074479	10	CG12990	adult
FBtr0345692;FBtr0076182	10	CG6168	adult
FBtr0076198	10	CG32081	adult
FBtr0076232	10	Elo68alpha	adult
FBtr0076421	10	CG3088	adult
FBtr0340709;FBtr0076530	10	CG13315	adult
FBtr0076584	10	CG32026	adult
FBtr0077628	10	CG8813	adult
FBtr0078354	10	Est-Q	adult
FBtr0078370	10	CG33290	adult
FBtr0332159;FBtr0078786	10	CG31542	adult
FBtr0079143;FBtr0342615	10	CG9029	adult
FBtr0335485;FBtr0079470	10	Spn28B	adult
FBtr0079471	10	Cyp4d21	adult
FBtr0079757	10	CG32985	adult
FBtr0080111	10	CG17118	adult
FBtr0080127	10	CG17108	adult
FBtr0345683;FBtr0081378	10	CG10651	adult
FBtr0082152	10	CG9458	adult
FBtr0082620	10	Pglym87	adult
FBtr0345306;FBtr0083225	10	sxe2	adult
FBtr0083694	10	CG7695	adult
FBtr0083775	10	CG3581	adult
FBtr0084170	10	CG6332	adult
FBtr0339258;FBtr0084810	10	to	adult
FBtr0084879	10	CG5107	adult
FBtr0085587	10	Ppi1	adult
FBtr0085667	10	PH4alphaNE3	adult
FBtr0086328	10	Obp56f	adult
FBtr0086596	10	CG15116	adult
FBtr0087181	10	CG30324	adult
FBtr0087182	10	CG7755	adult
FBtr0087817;FBtr0289995	10	CG30486	adult
FBtr0089608;FBtr0305053	10	Dup99B	adult
FBtr0302931;FBtr0091954	10	BG642312	adult
FBtr0100088	10	CG34033	adult
FBtr0100095	10	CG34040	adult
FBtr0344267;FBtr0339239;FBtr0100441	10	CG14246	adult
FBtr0334760;FBtr0100503	10	Obp22a	adult
FBtr0110781	10	CG11598	adult
FBtr0110870	10	CG34129	adult
FBtr0331203;FBtr0112751	10	CG34447	adult
FBtr0113047	10	CG11112	adult
FBtr0332995;FBtr0113049	10	CG1701	adult
FBtr0300052	10	CG18231	adult
FBtr0300295	10	Sfp23F	adult
FBtr0300296	10	Sfp24Ba	adult
FBtr0300306	10	Sfp33A1	adult
FBtr0346715;FBtr0300311	10	Sfp35C	adult
FBtr0300314	10	Sfp65A	adult
FBtr0346540;FBtr0300317	10	Sfp77F	adult
FBtr0300322	10	Sfp84E	adult
FBtr0300323	10	Sfp51E	adult
FBtr0300354	10	CG15635	adult
FBtr0344465;FBtr0344112;FBtr0301619;FBtr0301618	10	stnA	adult
FBtr0301934	10	Sfp24Bc	adult
FBtr0336822;FBtr0301938	10	Sfp38D	adult
FBtr0302203	10	CG42463	adult
FBtr0303841	10	CG11608	adult
FBtr0304898	10	CG43111	adult
FBtr0344808;FBtr0305487	10	CG43147	adult
FBtr0306923	10	CG43319	adult
FBtr0308601	10	CG11828	adult
FBtr0309244;FBtr0072413	11	CG30427	adult
FBtr0072908;FBtr0072906;FBtr0072907;FBtr0072905	11	CG1275	adult
FBtr0072967	11	Cyp4d20	adult
FBtr0074515	11	CG7135	adult
FBtr0303233;FBtr0076518	11	CG13314	adult
FBtr0302569;FBtr0100263;FBtr0332215;FBtr0339792;FBtr0079013;FBtr0332212;FBtr0332214;FBtr0339791;FBtr0332213;FBtr0100259;FBtr0100260;FBtr0079012	11	qtc	adult
FBtr0079574	11	Bsg	adult
FBtr0079809	11	scat	adult
FBtr0080275	11	Mal-B1	adult
FBtr0331619;FBtr0080908	11	CG17928	adult
FBtr0082707	11	Hsc70-2	adult
FBtr0083334;FBtr0300036;FBtr0083332;FBtr0083333;FBtr0300037;FBtr0333726	11	Fas1	adult
FBtr0083929	11	CG31200	adult
FBtr0083930	11	CG31199	adult
FBtr0084044	11	CG31207	adult
FBtr0085105	11	CG17189	adult
FBtr0086469	11	CG18367	adult
FBtr0086973	11	CG9642	adult
FBtr0345529;FBtr0087488	11	CG17386	adult
FBtr0087577	11	VGAT	adult
FBtr0089564	11	Zasp66	adult
FBtr0343641;FBtr0100327	11	Ance-3	adult
FBtr0112392	11	CG34199	adult
FBtr0112410	11	CG34217	adult
FBtr0299610	11	CG42269	adult
FBtr0300200	11	inaF-B	adult
FBtr0300379;FBtr0300378;FBtr0100146;FBtr0100148;FBtr0300377;FBtr0089218;FBtr0089217;FBtr0333674;FBtr0333673;FBtr0333675	11	CaMKII	adult
FBtr0300865	11	CG14893	adult
FBtr0302311	11	CG17404	adult
FBtr0302718;FBtr0302719	11	Cpr47Ef	adult
FBtr0303445	11	CG31808	adult
FBtr0305257	11	CG43129	adult
FBtr0308579	11	Mlc-c	adult
FBtr0340479	11	CG32694	adult
FBtr0114466;FBtr0070888;FBtr0331169	12	Tsp5D	adult
FBtr0114595;FBtr0071351;FBtr0114594	12	CG7766	adult
FBtr0307382;FBtr0071410	12	CG32694	adult
FBtr0071909;FBtr0305132	12	inaD	adult
FBtr0072130;FBtr0330600	12	TM4SF	adult
FBtr0073468	12	antdh	adult
FBtr0076200;FBtr0076199;FBtr0076201	12	CG7888	adult
FBtr0076559	12	CG5653	adult
FBtr0346546;FBtr0076688	12	CdsA	adult
FBtr0346074;FBtr0077060	12	Cpr65Au	adult
FBtr0077397;FBtr0336834;FBtr0077400;FBtr0077399;FBtr0077398;FBtr0077395;FBtr0345631;FBtr0077396;FBtr0336833	12	hoe1	adult
FBtr0077425	12	CG16857	adult
FBtr0078315;FBtr0078314;FBtr0078312;FBtr0078311;FBtr0078313	12	CG33056	adult
FBtr0078424	12	CG32444	adult
FBtr0305954;FBtr0078644;FBtr0078643;FBtr0078642	12	CG1213	adult
FBtr0345250;FBtr0078656;FBtr0345251	12	Obp83a	adult
FBtr0301770;FBtr0113341;FBtr0113340;FBtr0113338;FBtr0078900;FBtr0301771;FBtr0301769;FBtr0078901;FBtr0078899;FBtr0078898;FBtr0078897;FBtr0301772;FBtr0301768;FBtr0300789;FBtr0100500;FBtr0100499;FBtr0310614;FBtr0113337	12	cpx	adult
FBtr0331225;FBtr0079283	12	CG9497	adult
FBtr0332369;FBtr0100382;FBtr0079381	12	nrv2	adult
FBtr0079436	12	ninaC	adult
FBtr0082375	12	Ugt35b	adult
FBtr0332162;FBtr0332161;FBtr0082579;FBtr0082578;FBtr0082580	12	CG33098	adult
FBtr0084056	12	CG17298	adult
FBtr0084214	12	PyK	adult
FBtr0084362	12	CG13833	adult
FBtr0084825	12	CG31104	adult
FBtr0085104	12	CG14259	adult
FBtr0085513	12	trp	adult
FBtr0087047	12	inaC	adult
FBtr0087083	12	CG15617	adult
FBtr0087222	12	Jhedup	adult
FBtr0087361;FBtr0332267;FBtr0087362	12	igl	adult
FBtr0309056;FBtr0087476	12	CG12858	adult
FBtr0087832	12	Galphaq	adult
FBtr0087954	12	CG8834	adult
FBtr0088020	12	SkpB	adult
FBtr0089959	12	Tm1	adult
FBtr0089972;FBtr0089971	12	CG1732	adult
FBtr0346107;FBtr0100012	12	CG33970	adult
FBtr0100879	12	mt:ND4	adult
FBtr0111143;FBtr0304625	12	Snap25	adult
FBtr0111189;FBtr0111190	12	CG40485	adult
FBtr0112529	12	CG34327	adult
FBtr0343338;FBtr0299697	12	Mlp60A	adult
FBtr0299700;FBtr0299699;FBtr0299698;FBtr0343482	12	prom	adult
FBtr0299739;FBtr0299738;FBtr0299737;FBtr0299736	12	CG42319	adult
FBtr0346092;FBtr0300451	12	CG31205	adult
FBtr0300453	12	CG32638	adult
FBtr0344260;FBtr0308829;FBtr0308828;FBtr0301117	12	CG4733	adult
FBtr0302213	12	CG9150	adult
FBtr0332999;FBtr0302504	12	l(2)03659	adult
FBtr0333594;FBtr0333593;FBtr0306207;FBtr0333591;FBtr0302646;FBtr0333592;FBtr0306206	12	axo	adult
FBtr0302786	12	Lmpt	adult
FBtr0304691;FBtr0083722	12	CG12269	adult
FBtr0306639	12	Prm	adult
FBtr0308087;FBtr0308086	12	CG1674	adult
FBtr0331589	12	CG10352	adult
FBtr0333551	12	GstS1	adult
FBtr0334482	12	bt	adult
FBtr0344663;FBtr0344662	12	eys	adult
