# Supplementary material for: The developmental proteome of Drosophila melanogaster
Source: HighWire-hosted journal article supplement (doi:10.1101/gr.213694.116), 2017-04-05
Supplement: Supplemental_Tables.zip [file Supplemental_Table_S5.xlsx]

## Sheet: categorical_onlyE_apclusters_GO
stage	GOBPID	Pvalue	OddsRatio	ExpCount	Count	Size	Term	FDR	cluster	genes
embryo	GO:0045197	1.98151e-06	172.236	0.0260513	3	27	establishment or maintenance of epithelial cell apical/basal polarity	0.000245479	1	baz; ft; rib
embryo	GO:0035088	4.81331e-06	125.172	0.0347351	3	36	establishment or maintenance of apical/basal cell polarity	0.000245479	1	baz; ft; rib
embryo	GO:0061245	4.81331e-06	125.172	0.0347351	3	36	establishment or maintenance of bipolar cell polarity	0.000245479	1	baz; ft; rib
embryo	GO:0048513	1.02097e-05	15.3534	1.3894	8	1440	organ development	0.000390521	1	baz; stwl; ft; Mes2; Zif; l(3)neo38; ttk; rib
embryo	GO:0035150	1.31128e-05	87.7872	0.0482431	3	50	regulation of tube size	0.000401253	1	ft; ttk; rib
embryo	GO:0009791	1.89615e-05	17.299	0.660931	6	685	post-embryonic development	0.000464343	1	stwl; ft; Mes2; Zif; l(3)neo38; ttk
embryo	GO:0007163	2.62877e-05	32.0262	0.188148	4	195	establishment or maintenance of cell polarity	0.000464343	1	baz; ft; Zif; rib
embryo	GO:0048754	3.03492e-05	65.4074	0.063681	3	66	branching morphogenesis of an epithelial tube	0.000464343	1	baz; ttk; rib
embryo	GO:0060446	3.03492e-05	65.4074	0.063681	3	66	branching involved in open tracheal system development	0.000464343	1	baz; ttk; rib
embryo	GO:0061138	3.03492e-05	65.4074	0.063681	3	66	morphogenesis of a branching epithelium	0.000464343	1	baz; ttk; rib
embryo	GO:0001763	3.46924e-05	62.4192	0.0665755	3	69	morphogenesis of a branching structure	0.00048254	1	baz; ttk; rib
embryo	GO:0035152	4.63718e-05	56.4018	0.0733296	3	76	regulation of tube architecture, open tracheal system	0.00053018	1	ft; ttk; rib
embryo	GO:0045196	4.67137e-05	275.911	0.0106135	2	11	establishment or maintenance of neuroblast polarity	0.00053018	1	baz; Zif
embryo	GO:0007424	4.85132e-05	27.2344	0.219989	4	228	open tracheal system development	0.00053018	1	baz; ft; ttk; rib
embryo	GO:0035295	5.85202e-05	13.9879	0.805661	6	835	tube development	0.000595598	1	baz; ft; Mes2; l(3)neo38; ttk; rib
embryo	GO:0060541	6.42309e-05	25.278	0.236391	4	245	respiratory system development	0.000595598	1	baz; ft; ttk; rib
embryo	GO:0035089	6.61775e-05	225.709	0.0125432	2	13	establishment of apical/basal cell polarity	0.000595598	1	baz; ft
embryo	GO:0061162	0.000101648	177.3	0.0154378	2	16	establishment of monopolar cell polarity	0.000818533	1	baz; ft
embryo	GO:0061339	0.000101648	177.3	0.0154378	2	16	establishment or maintenance of monopolar cell polarity	0.000818533	1	baz; ft
embryo	GO:0048569	0.000112493	15.2193	0.542253	5	562	post-embryonic organ development	0.000860569	1	stwl; ft; Zif; l(3)neo38; ttk
embryo	GO:0060562	0.000121298	14.9659	0.550937	5	571	epithelial tube morphogenesis	0.000883741	1	baz; ft; l(3)neo38; ttk; rib
embryo	GO:0035239	0.000158244	14.1021	0.582777	5	604	tube morphogenesis	0.00110051	1	baz; ft; l(3)neo38; ttk; rib
embryo	GO:0048646	0.000204861	13.3063	0.615583	5	638	anatomical structure formation involved in morphogenesis	0.00136277	1	baz; stwl; ft; ttk; rib
embryo	GO:0007426	0.000252896	107.843	0.0241216	2	25	tracheal outgrowth, open tracheal system	0.00161221	1	ttk; rib
embryo	GO:0060429	0.000321867	10.0248	1.09319	6	1133	epithelium development	0.00186516	1	baz; ft; Mes2; l(3)neo38; ttk; rib
embryo	GO:0001709	0.000329149	28.4282	0.141835	3	147	cell fate determination	0.00186516	1	baz; stwl; ttk
embryo	GO:0007294	0.00034152	91.837	0.027981	2	29	germarium-derived oocyte fate determination	0.00186516	1	baz; stwl
embryo	GO:0002009	0.000349406	11.7857	0.689877	5	715	morphogenesis of an epithelium	0.00186516	1	baz; ft; l(3)neo38; ttk; rib
embryo	GO:0002164	0.000356173	27.6509	0.145694	3	151	larval development	0.00186516	1	stwl; Mes2; Zif
embryo	GO:0030716	0.000365718	88.55	0.0289459	2	30	oocyte fate determination	0.00186516	1	baz; stwl
embryo	GO:0048729	0.000387371	11.5102	0.705315	5	731	tissue morphogenesis	0.00191186	1	baz; ft; l(3)neo38; ttk; rib
embryo	GO:0030706	0.000416556	82.6333	0.0308756	2	32	germarium-derived oocyte differentiation	0.00199166	1	baz; stwl
embryo	GO:0048732	0.000445752	25.5521	0.157273	3	163	gland development	0.00206667	1	stwl; Zif; rib
embryo	GO:0007275	0.000468295	8.75126	3.06923	9	3181	multicellular organismal development	0.00210733	1	baz; stwl; ft; Mes2; Zif; l(3)neo38; yellow-e3; ttk; rib
embryo	GO:0048731	0.000523976	8.15944	2.36777	8	2454	system development	0.00222098	1	baz; stwl; ft; Mes2; Zif; l(3)neo38; ttk; rib
embryo	GO:0010631	0.000530599	24.0294	0.166921	3	173	epithelial cell migration	0.00222098	1	baz; ttk; rib
embryo	GO:0090132	0.000539614	23.8869	0.167886	3	174	epithelium migration	0.00222098	1	baz; ttk; rib
embryo	GO:0009888	0.000551617	8.98794	1.20608	6	1250	tissue development	0.00222098	1	baz; ft; Mes2; l(3)neo38; ttk; rib
embryo	GO:0001667	0.000605486	22.9345	0.17464	3	181	ameboidal-type cell migration	0.00231359	1	baz; ttk; rib
embryo	GO:0090130	0.000605486	22.9345	0.17464	3	181	tissue migration	0.00231359	1	baz; ttk; rib
embryo	GO:0055059	0.000619983	66.9622	0.0376297	2	39	asymmetric neuroblast division	0.00231359	1	baz; Zif
embryo	GO:0036445	0.000652264	65.1947	0.0385945	2	40	neuronal stem cell division	0.00232085	1	baz; Zif
embryo	GO:0055057	0.000652264	65.1947	0.0385945	2	40	neuroblast division	0.00232085	1	baz; Zif
embryo	GO:0090066	0.000719087	21.5802	0.185254	3	192	regulation of anatomical structure size	0.00250046	1	ft; ttk; rib
embryo	GO:0030010	0.000753907	60.4098	0.0414891	2	43	establishment of cell polarity	0.00256328	1	baz; ft
embryo	GO:0035166	0.000825657	57.5907	0.0434188	2	45	post-embryonic hemopoiesis	0.00268778	1	stwl; Zif
embryo	GO:0035167	0.000825657	57.5907	0.0434188	2	45	larval lymph gland hemopoiesis	0.00268778	1	stwl; Zif
embryo	GO:0045165	0.000860349	12.4969	0.465064	4	482	cell fate commitment	0.00269381	1	baz; stwl; Zif; ttk
embryo	GO:0035151	0.000862724	56.2773	0.0443837	2	46	regulation of tube size, open tracheal system	0.00269381	1	ft; ttk
embryo	GO:0048103	0.00097868	52.6723	0.0472783	2	49	somatic stem cell division	0.00299476	1	baz; Zif
embryo	GO:0009887	0.0010796	9.05994	0.88092	5	913	organ morphogenesis	0.00318789	1	baz; ft; l(3)neo38; ttk; rib
embryo	GO:0048856	0.00108347	7.58648	3.40597	9	3530	anatomical structure development	0.00318789	1	baz; stwl; ft; Mes2; Zif; l(3)neo38; yellow-e3; ttk; rib
embryo	GO:0008104	0.00115995	11.4932	0.503658	4	522	protein localization	0.00334853	1	baz; stwl; ft; rib
embryo	GO:0048542	0.0014163	43.3965	0.0569269	2	59	lymph gland development	0.00401285	1	stwl; Zif
embryo	GO:0098722	0.00151318	41.9186	0.0588566	2	61	asymmetric stem cell division	0.00420939	1	baz; Zif
embryo	GO:0098742	0.00161316	40.5377	0.0607864	2	63	cell-cell adhesion via plasma-membrane adhesion molecules	0.00440737	1	baz; ft
embryo	GO:0016337	0.0016643	39.8806	0.0617512	2	64	single organismal cell-cell adhesion	0.00446733	1	baz; ft
embryo	GO:0022603	0.00178544	15.5962	0.253759	3	263	regulation of anatomical structure morphogenesis	0.00470986	1	baz; ttk; rib
embryo	GO:0061326	0.00187657	37.4515	0.0656107	2	68	renal tubule development	0.00478524	1	baz; rib
embryo	GO:0072002	0.00187657	37.4515	0.0656107	2	68	Malpighian tubule development	0.00478524	1	baz; rib
embryo	GO:0098602	0.00198729	36.3441	0.0675404	2	70	single organism cell adhesion	0.00498452	1	baz; ft
embryo	GO:0044707	0.00205229	6.76552	3.69157	9	3826	single-multicellular organism process	0.00506453	1	baz; stwl; ft; Mes2; Zif; l(3)neo38; yellow-e3; ttk; rib
embryo	GO:0030111	0.00210107	35.3	0.0694701	2	72	regulation of Wnt signaling pathway	0.00510259	1	baz; ft
embryo	GO:0002165	0.00217006	9.61808	0.596285	4	618	instar larval or pupal development	0.0051878	1	ft; Mes2; l(3)neo38; ttk
embryo	GO:0044767	0.00223176	6.66174	3.73112	9	3867	single-organism developmental process	0.00525321	1	baz; stwl; ft; Mes2; Zif; l(3)neo38; yellow-e3; ttk; rib
embryo	GO:0016477	0.00229213	14.25	0.276916	3	287	cell migration	0.00525987	1	baz; ttk; rib
embryo	GO:0001655	0.00233772	33.3811	0.0733296	2	76	urogenital system development	0.00525987	1	baz; rib
embryo	GO:0072001	0.00233772	33.3811	0.0733296	2	76	renal system development	0.00525987	1	baz; rib
embryo	GO:0048523	0.0024026	7.46544	1.0517	5	1090	negative regulation of cellular process	0.00530955	1	baz; stwl; ft; l(3)neo38; ttk
embryo	GO:0032502	0.00242921	6.55769	3.77165	9	3909	developmental process	0.00530955	1	baz; stwl; ft; Mes2; Zif; l(3)neo38; yellow-e3; ttk; rib
embryo	GO:0048870	0.00257595	13.6588	0.288494	3	299	cell motility	0.00551987	1	baz; ttk; rib
embryo	GO:0009790	0.00259758	9.13178	0.626196	4	649	embryo development	0.00551987	1	baz; Mes2; ttk; rib
embryo	GO:0060560	0.00265051	31.2557	0.0781539	2	81	developmental growth involved in morphogenesis	0.00555517	1	baz; ttk
embryo	GO:0030097	0.00271531	30.8625	0.0791188	2	82	hemopoiesis	0.00561409	1	stwl; Zif
embryo	GO:0051128	0.0027625	8.97027	0.63681	4	660	regulation of cellular component organization	0.00563549	1	baz; l(3)neo38; ttk; rib
embryo	GO:0051674	0.00282855	13.2015	0.298143	3	309	localization of cell	0.00564276	1	baz; ttk; rib
embryo	GO:0050793	0.00283982	8.89864	0.641634	4	665	regulation of developmental process	0.00564276	1	baz; ft; ttk; rib
embryo	GO:0007405	0.002982	29.3833	0.0829782	2	86	neuroblast proliferation	0.00584931	1	baz; Zif
embryo	GO:0061351	0.00305053	29.0353	0.0839431	2	87	neural precursor cell proliferation	0.00590799	1	baz; Zif
embryo	GO:0017145	0.00326056	28.0386	0.0868377	2	90	stem cell division	0.00623581	1	baz; Zif
embryo	GO:0033036	0.0033533	8.4776	0.671545	4	696	macromolecule localization	0.00628954	1	baz; stwl; ft; rib
embryo	GO:0007444	0.00337087	8.46465	0.672509	4	697	imaginal disc development	0.00628954	1	ft; Mes2; l(3)neo38; ttk
embryo	GO:2000027	0.00347722	27.1077	0.0897323	2	93	regulation of organ morphogenesis	0.0063684	1	baz; ttk
embryo	GO:0008283	0.00349638	12.2172	0.321299	3	333	cell proliferation	0.0063684	1	baz; ft; Zif
embryo	GO:0002520	0.00370048	26.2362	0.0926268	2	96	immune system development	0.0065834	1	stwl; Zif
embryo	GO:0048534	0.00370048	26.2362	0.0926268	2	96	hematopoietic or lymphoid organ development	0.0065834	1	stwl; Zif
embryo	GO:0008356	0.00385297	25.6854	0.0945566	2	98	asymmetric cell division	0.0067759	1	baz; Zif
embryo	GO:0072089	0.0039303	25.4186	0.0955214	2	99	stem cell proliferation	0.00683336	1	baz; Zif
embryo	GO:0019438	0.00398707	6.57824	1.17906	5	1222	aromatic compound biosynthetic process	0.00685418	1	stwl; l(3)neo38; yellow-e3; ttk; rib
embryo	GO:0048589	0.00405626	11.568	0.338667	3	351	developmental growth	0.00689563	1	baz; ft; ttk
embryo	GO:0006996	0.00417274	5.81569	1.76473	6	1829	organelle organization	0.00694605	1	baz; stwl; ft; l(3)neo38; rib; fab1
embryo	GO:0048519	0.00417671	6.50116	1.19161	5	1235	negative regulation of biological process	0.00694605	1	baz; stwl; ft; l(3)neo38; ttk
embryo	GO:0001736	0.00432784	24.1627	0.100346	2	104	establishment of planar polarity	0.00704426	1	baz; ft
embryo	GO:0007164	0.00432784	24.1627	0.100346	2	104	establishment of tissue polarity	0.00704426	1	baz; ft
embryo	GO:0098609	0.00440952	23.9262	0.101311	2	105	cell-cell adhesion	0.00710164	1	baz; ft
embryo	GO:1901362	0.00465568	6.32378	1.22152	5	1266	organic cyclic compound biosynthetic process	0.0072952	1	stwl; l(3)neo38; yellow-e3; ttk; rib
embryo	GO:0045892	0.00473986	10.9212	0.357964	3	371	negative regulation of transcription, DNA-templated	0.0072952	1	stwl; l(3)neo38; ttk
embryo	GO:1902679	0.00473986	10.9212	0.357964	3	371	negative regulation of RNA biosynthetic process	0.0072952	1	stwl; l(3)neo38; ttk
embryo	GO:1903507	0.00473986	10.9212	0.357964	3	371	negative regulation of nucleic acid-templated transcription	0.0072952	1	stwl; l(3)neo38; ttk
embryo	GO:0042679	0.00481579	282.295	0.00482431	1	5	compound eye cone cell fate specification	0.0072952	1	ttk
embryo	GO:0042682	0.00481579	282.295	0.00482431	1	5	regulation of compound eye cone cell fate specification	0.0072952	1	ttk
embryo	GO:0007476	0.00510657	10.6235	0.367613	3	381	imaginal disc-derived wing morphogenesis	0.00751674	1	ft; l(3)neo38; ttk
embryo	GO:0008360	0.00517675	21.9875	0.109994	2	114	regulation of cell shape	0.00751674	1	ttk; rib
embryo	GO:0000902	0.00518056	7.45455	0.757417	4	785	cell morphogenesis	0.00751674	1	baz; ft; ttk; rib
embryo	GO:0051253	0.00525798	10.5087	0.371472	3	385	negative regulation of RNA metabolic process	0.00751674	1	stwl; l(3)neo38; ttk
embryo	GO:0042461	0.00526555	21.7912	0.110959	2	115	photoreceptor cell development	0.00751674	1	baz; ttk
embryo	GO:0007472	0.00533471	10.4523	0.373402	3	387	wing disc morphogenesis	0.00751674	1	ft; l(3)neo38; ttk
embryo	GO:0001738	0.00535506	21.5982	0.111924	2	116	morphogenesis of a polarized epithelium	0.00751674	1	baz; ft
embryo	GO:0016055	0.00535506	21.5982	0.111924	2	116	Wnt signaling pathway	0.00751674	1	baz; ft
embryo	GO:0009653	0.00548361	5.46126	1.86122	6	1929	anatomical structure morphogenesis	0.00762721	1	baz; stwl; ft; l(3)neo38; ttk; rib
embryo	GO:0003401	0.00577639	225.818	0.00578918	1	6	axis elongation	0.00782113	1	baz
embryo	GO:0045317	0.00577639	225.818	0.00578918	1	6	equator specification	0.00782113	1	ft
embryo	GO:0048052	0.00577639	225.818	0.00578918	1	6	R1/R6 cell differentiation	0.00782113	1	ttk
embryo	GO:0030855	0.00589106	10.0729	0.38691	3	401	epithelial cell differentiation	0.00790642	1	baz; ft; ttk
embryo	GO:0007293	0.00600129	20.3372	0.118678	2	123	germarium-derived egg chamber formation	0.0079743	1	baz; stwl
embryo	GO:0031668	0.00609641	20.1689	0.119643	2	124	cellular response to extracellular stimulus	0.0079743	1	stwl; fab1
embryo	GO:0045934	0.00609799	9.94376	0.391734	3	406	negative regulation of nucleobase-containing compound metabolic process	0.0079743	1	stwl; l(3)neo38; ttk
embryo	GO:0007298	0.00619222	20.0033	0.120608	2	125	border follicle cell migration	0.00802889	1	baz; ttk
embryo	GO:0032501	0.00624861	5.45622	4.2618	9	4417	multicellular organismal process	0.00803392	1	baz; stwl; ft; Mes2; Zif; l(3)neo38; yellow-e3; ttk; rib
embryo	GO:0010558	0.00665659	9.6226	0.404278	3	419	negative regulation of macromolecule biosynthetic process	0.0081796	1	stwl; l(3)neo38; ttk
embryo	GO:2000113	0.00665659	9.6226	0.404278	3	419	negative regulation of cellular macromolecule biosynthetic process	0.0081796	1	stwl; l(3)neo38; ttk
embryo	GO:0071496	0.00668166	19.2141	0.125432	2	130	cellular response to external stimulus	0.0081796	1	stwl; fab1
embryo	GO:0035001	0.00673614	188.167	0.00675404	1	7	dorsal trunk growth, open tracheal system	0.0081796	1	ttk
embryo	GO:0048104	0.00673614	188.167	0.00675404	1	7	establishment of body hair or bristle planar orientation	0.0081796	1	ft
embryo	GO:0060071	0.00673614	188.167	0.00675404	1	7	Wnt signaling pathway, planar cell polarity pathway	0.0081796	1	baz
embryo	GO:0090136	0.00673614	188.167	0.00675404	1	7	epithelial cell-cell adhesion	0.0081796	1	baz
embryo	GO:0009890	0.00706091	9.41176	0.412961	3	428	negative regulation of biosynthetic process	0.00840386	1	stwl; l(3)neo38; ttk
embryo	GO:0031327	0.00706091	9.41176	0.412961	3	428	negative regulation of cellular biosynthetic process	0.00840386	1	stwl; l(3)neo38; ttk
embryo	GO:0016331	0.0070856	18.6258	0.129292	2	134	morphogenesis of embryonic epithelium	0.00840386	1	baz; rib
embryo	GO:0035120	0.00719892	9.34346	0.415856	3	431	post-embryonic appendage morphogenesis	0.00847257	1	ft; l(3)neo38; ttk
embryo	GO:0016043	0.00728127	4.90254	2.66978	7	2767	cellular component organization	0.00850408	1	baz; stwl; ft; l(3)neo38; ttk; rib; fab1
embryo	GO:0040007	0.00738545	9.25386	0.419715	3	435	growth	0.00856041	1	baz; ft; ttk
embryo	GO:0035114	0.00757489	9.1659	0.423575	3	439	imaginal disc-derived appendage morphogenesis	0.00865693	1	ft; l(3)neo38; ttk
embryo	GO:0007297	0.00760591	17.9387	0.134116	2	139	ovarian follicle cell migration	0.00865693	1	baz; ttk
embryo	GO:0035107	0.0076707	9.12253	0.425505	3	441	appendage morphogenesis	0.00865693	1	ft; l(3)neo38; ttk
embryo	GO:0045175	0.00769505	161.273	0.0077189	1	8	basal protein localization	0.00865693	1	baz
embryo	GO:0048737	0.00776723	9.07955	0.427434	3	443	imaginal disc-derived appendage development	0.00867436	1	ft; l(3)neo38; ttk
embryo	GO:0048736	0.00796251	8.99474	0.431294	3	447	appendage development	0.008828	1	ft; l(3)neo38; ttk
embryo	GO:0051172	0.00816072	8.91146	0.435153	3	451	negative regulation of nitrogen compound metabolic process	0.00898267	1	stwl; l(3)neo38; ttk
embryo	GO:0071840	0.00834916	4.75534	2.73346	7	2833	cellular component organization or biogenesis	0.00912444	1	baz; stwl; ft; l(3)neo38; ttk; rib; fab1
embryo	GO:0035567	0.0086531	141.102	0.00868377	1	9	non-canonical Wnt signaling pathway	0.00930757	1	baz
embryo	GO:0051101	0.0086531	141.102	0.00868377	1	9	regulation of DNA binding	0.00930757	1	ttk
embryo	GO:0032989	0.00876007	6.35706	0.878025	4	910	cellular component morphogenesis	0.00930757	1	baz; ft; ttk; rib
embryo	GO:0048699	0.00876007	6.35706	0.878025	4	910	generation of neurons	0.00930757	1	baz; ft; Zif; ttk
embryo	GO:2000026	0.00893039	8.61195	0.449626	3	466	regulation of multicellular organismal development	0.0094231	1	baz; ft; ttk
embryo	GO:0051179	0.00902699	4.85257	2.05419	6	2129	localization	0.00945979	1	baz; stwl; ft; ttk; rib; fab1
embryo	GO:0007377	0.00961031	125.414	0.00964863	1	10	germ-band extension	0.00961031	1	baz
embryo	GO:0008333	0.00961031	125.414	0.00964863	1	10	endosome to lysosome transport	0.00961031	1	fab1
embryo	GO:0016332	0.00961031	125.414	0.00964863	1	10	establishment or maintenance of polarity of embryonic epithelium	0.00961031	1	baz
embryo	GO:0018990	0.00961031	125.414	0.00964863	1	10	ecdysis, chitin-based cuticle	0.00961031	1	Mes2
embryo	GO:0045186	0.00961031	125.414	0.00964863	1	10	zonula adherens assembly	0.00961031	1	baz
embryo	GO:0045571	0.00961031	125.414	0.00964863	1	10	negative regulation of imaginal disc growth	0.00961031	1	ft
embryo	GO:0060232	0.00961031	125.414	0.00964863	1	10	delamination	0.00961031	1	baz
embryo	GO:0035295	1.18252e-10	7.64893	4.0283	21	835	tube development	2.16671e-08	2	robo; trn; Traf4; tup; stumps; srp; pygo; ttk; EcR; par-1; Vhl; Mef2; Pkn; pnt; Ada2b; seq; Glut4EF; jing; d; pyd; CG43658
embryo	GO:0009888	1.45417e-10	6.50262	6.03039	25	1250	tissue development	2.16671e-08	2	Tsp3A; robo; trn; Traf4; tup; grn; stumps; srp; pygo; ttk; EcR; par-1; Vhl; Mef2; Pkn; pnt; Ada2b; seq; Glut4EF; jing; kon; d; pros; pyd; CG43658
embryo	GO:0048729	6.81257e-10	7.59232	3.52657	19	731	tissue morphogenesis	6.0862e-08	2	trn; Traf4; tup; stumps; srp; pygo; ttk; EcR; par-1; Vhl; Pkn; pnt; seq; Glut4EF; jing; d; pros; pyd; CG43658
embryo	GO:0060429	8.16939e-10	6.30974	5.46595	23	1133	epithelium development	6.0862e-08	2	Tsp3A; robo; trn; Traf4; tup; stumps; srp; pygo; ttk; EcR; par-1; Vhl; Mef2; Pkn; pnt; Ada2b; seq; Glut4EF; jing; kon; d; pyd; CG43658
embryo	GO:0002009	3.5957e-09	7.1818	3.44938	18	715	morphogenesis of an epithelium	2.14304e-07	2	trn; Traf4; tup; stumps; srp; pygo; ttk; EcR; par-1; Vhl; Pkn; pnt; seq; Glut4EF; jing; d; pyd; CG43658
embryo	GO:0006928	4.45615e-09	7.50971	3.06826	17	636	movement of cell or subcellular component	2.21322e-07	2	Tsp3A; robo; trn; Traf4; tup; grn; stumps; srp; ttk; EcR; par-1; Vhl; pnt; seq; jing; not; pros
embryo	GO:0048518	6.69691e-09	5.77356	5.54796	22	1150	positive regulation of biological process	2.85097e-07	2	Tsp3A; robo; Brms1; dik; Traf4; Fip1; tup; RanGAP; srp; pygo; ttk; EcR; par-1; Mef2; Pkn; pnt; Ada2b; jing; kon; d; pros; CG43658
embryo	GO:0016477	9.4462e-09	11.0018	1.38458	12	287	cell migration	3.51871e-07	2	Tsp3A; robo; trn; stumps; srp; ttk; EcR; par-1; Vhl; pnt; jing; not
embryo	GO:0048870	1.49264e-08	10.5314	1.44247	12	299	cell motility	4.33532e-07	2	Tsp3A; robo; trn; stumps; srp; ttk; EcR; par-1; Vhl; pnt; jing; not
embryo	GO:0048513	1.59159e-08	5.16055	6.94701	24	1440	organ development	4.33532e-07	2	robo; trn; Traf4; tup; grn; stumps; srp; pygo; ttk; EcR; par-1; Vhl; Mef2; Pkn; pnt; Ada2b; seq; Glut4EF; jing; kon; d; pros; pyd; CG43658
embryo	GO:0035239	1.60028e-08	7.29066	2.91389	16	604	tube morphogenesis	4.33532e-07	2	trn; Traf4; stumps; pygo; ttk; EcR; par-1; Vhl; Pkn; pnt; seq; Glut4EF; jing; d; pyd; CG43658
embryo	GO:0051674	2.15196e-08	10.1684	1.49071	12	309	localization of cell	5.34403e-07	2	Tsp3A; robo; trn; stumps; srp; ttk; EcR; par-1; Vhl; pnt; jing; not
embryo	GO:0040011	2.36517e-08	7.07558	2.9959	16	621	locomotion	5.4217e-07	2	Tsp3A; robo; trn; tup; grn; stumps; srp; ttk; EcR; par-1; Vhl; pnt; seq; jing; not; pros
embryo	GO:0009887	2.66621e-08	5.95234	4.4046	19	913	organ morphogenesis	5.67523e-07	2	robo; trn; Traf4; tup; grn; srp; pygo; ttk; EcR; par-1; Pkn; pnt; seq; Glut4EF; jing; d; pros; pyd; CG43658
embryo	GO:0006355	4.96387e-08	5.70399	4.57827	19	949	regulation of transcription, DNA-templated	8.70138e-07	2	Brms1; dik; GATAd; YL-1; tup; grn; srp; pygo; ttk; EcR; ADD1; Mef2; pnt; Ada2b; seq; MED21; jing; not; pros
embryo	GO:1903506	4.96387e-08	5.70399	4.57827	19	949	regulation of nucleic acid-templated transcription	8.70138e-07	2	Brms1; dik; GATAd; YL-1; tup; grn; srp; pygo; ttk; EcR; ADD1; Mef2; pnt; Ada2b; seq; MED21; jing; not; pros
embryo	GO:2001141	4.96387e-08	5.70399	4.57827	19	949	regulation of RNA biosynthetic process	8.70138e-07	2	Brms1; dik; GATAd; YL-1; tup; grn; srp; pygo; ttk; EcR; ADD1; Mef2; pnt; Ada2b; seq; MED21; jing; not; pros
embryo	GO:0060562	5.52171e-08	7.08693	2.75468	15	571	epithelial tube morphogenesis	9.14149e-07	2	trn; Traf4; stumps; pygo; ttk; EcR; par-1; Pkn; pnt; seq; Glut4EF; jing; d; pyd; CG43658
embryo	GO:0010631	1.27301e-07	13.1417	0.834606	9	173	epithelial cell migration	1.89792e-06	2	Tsp3A; robo; stumps; ttk; EcR; par-1; Vhl; pnt; jing
embryo	GO:0080090	1.33117e-07	4.66259	7.13516	23	1479	regulation of primary metabolic process	1.89792e-06	2	Brms1; dik; Traf4; Fip1; GATAd; YL-1; tup; grn; srp; pygo; ttk; EcR; par-1; ADD1; Mef2; pnt; Ada2b; seq; MED21; jing; not; pros; pyd
embryo	GO:0090132	1.33746e-07	13.061	0.839431	9	174	epithelium migration	1.89792e-06	2	Tsp3A; robo; stumps; ttk; EcR; par-1; Vhl; pnt; jing
embryo	GO:0010604	1.67253e-07	6.95367	2.57136	14	533	positive regulation of macromolecule metabolic process	2.21649e-06	2	Brms1; dik; Traf4; Fip1; tup; srp; pygo; ttk; EcR; Mef2; pnt; Ada2b; jing; pros
embryo	GO:0051252	1.71071e-07	5.2324	4.94975	19	1026	regulation of RNA metabolic process	2.21649e-06	2	Brms1; dik; GATAd; YL-1; tup; grn; srp; pygo; ttk; EcR; ADD1; Mef2; pnt; Ada2b; seq; MED21; jing; not; pros
embryo	GO:0001667	1.8738e-07	12.5222	0.873201	9	181	ameboidal-type cell migration	2.23357e-06	2	Tsp3A; robo; stumps; ttk; EcR; par-1; Vhl; pnt; jing
embryo	GO:0090130	1.8738e-07	12.5222	0.873201	9	181	tissue migration	2.23357e-06	2	Tsp3A; robo; stumps; ttk; EcR; par-1; Vhl; pnt; jing
embryo	GO:0031323	2.30893e-07	4.50417	7.35226	23	1524	regulation of cellular metabolic process	2.40614e-06	2	Brms1; dik; Traf4; Fip1; GATAd; YL-1; tup; grn; srp; pygo; ttk; EcR; par-1; ADD1; Mef2; pnt; Ada2b; seq; MED21; jing; not; pros; pyd
embryo	GO:2000112	2.31529e-07	5.12148	5.04623	19	1046	regulation of cellular macromolecule biosynthetic process	2.40614e-06	2	Brms1; dik; GATAd; YL-1; tup; grn; srp; pygo; ttk; EcR; ADD1; Mef2; pnt; Ada2b; seq; MED21; jing; not; pros
embryo	GO:0009893	2.34821e-07	6.28892	3.07791	15	638	positive regulation of metabolic process	2.40614e-06	2	Brms1; dik; Traf4; Fip1; tup; RanGAP; srp; pygo; ttk; EcR; Mef2; pnt; Ada2b; jing; pros
embryo	GO:0010556	2.38547e-07	5.11062	5.05588	19	1048	regulation of macromolecule biosynthetic process	2.40614e-06	2	Brms1; dik; GATAd; YL-1; tup; grn; srp; pygo; ttk; EcR; ADD1; Mef2; pnt; Ada2b; seq; MED21; jing; not; pros
embryo	GO:0016070	2.42228e-07	4.49055	7.37155	23	1528	RNA metabolic process	2.40614e-06	2	Es2; CG11486; Brms1; dik; Fip1; GATAd; YL-1; CG16865; tup; grn; srp; pygo; ttk; EcR; CG12343; Mef2; pnt; Ada2b; seq; MED21; jing; not; pros
embryo	GO:0060255	2.72867e-07	4.4568	7.4198	23	1538	regulation of macromolecule metabolic process	2.62304e-06	2	Brms1; dik; Traf4; Fip1; GATAd; YL-1; tup; grn; srp; pygo; ttk; EcR; par-1; ADD1; Mef2; pnt; Ada2b; seq; MED21; jing; not; pros; pyd
embryo	GO:0019219	3.70227e-07	4.95272	5.20061	19	1078	regulation of nucleobase-containing compound metabolic process	3.44774e-06	2	Brms1; dik; GATAd; YL-1; tup; grn; srp; pygo; ttk; EcR; ADD1; Mef2; pnt; Ada2b; seq; MED21; jing; not; pros
embryo	GO:0031326	5.13258e-07	4.83759	5.31157	19	1101	regulation of cellular biosynthetic process	4.47748e-06	2	Brms1; dik; GATAd; YL-1; tup; grn; srp; pygo; ttk; EcR; ADD1; Mef2; pnt; Ada2b; seq; MED21; jing; not; pros
embryo	GO:0009889	5.20497e-07	4.83269	5.31639	19	1102	regulation of biosynthetic process	4.47748e-06	2	Brms1; dik; GATAd; YL-1; tup; grn; srp; pygo; ttk; EcR; ADD1; Mef2; pnt; Ada2b; seq; MED21; jing; not; pros
embryo	GO:0090304	5.46744e-07	4.16715	8.35089	24	1731	nucleic acid metabolic process	4.47748e-06	2	Es2; CG11486; Brms1; dik; Fip1; GATAd; YL-1; CG16865; tup; grn; srp; trem; pygo; ttk; EcR; CG12343; Mef2; pnt; Ada2b; seq; MED21; jing; not; pros
embryo	GO:0048522	5.57507e-07	5.00629	4.79537	18	994	positive regulation of cellular process	4.47748e-06	2	Tsp3A; robo; Brms1; dik; Traf4; Fip1; tup; srp; pygo; ttk; EcR; par-1; Mef2; pnt; Ada2b; jing; kon; CG43658
embryo	GO:0019222	5.76972e-07	4.15304	8.37501	24	1736	regulation of metabolic process	4.47748e-06	2	Brms1; dik; Traf4; Fip1; GATAd; YL-1; tup; RanGAP; grn; srp; pygo; ttk; EcR; par-1; ADD1; Mef2; pnt; Ada2b; seq; MED21; jing; not; pros; pyd
embryo	GO:0035220	6.13394e-07	6.69576	2.43145	13	504	wing disc development	4.47748e-06	2	trn; tup; pygo; ttk; EcR; par-1; Pkn; pnt; Ada2b; Glut4EF; jing; d; pyd
embryo	GO:0007507	6.26117e-07	16.7205	0.501729	7	104	heart development	4.47748e-06	2	robo; tup; stumps; srp; EcR; Mef2; pnt
embryo	GO:0072358	6.26117e-07	16.7205	0.501729	7	104	cardiovascular system development	4.47748e-06	2	robo; tup; stumps; srp; EcR; Mef2; pnt
embryo	GO:0072359	6.26117e-07	16.7205	0.501729	7	104	circulatory system development	4.47748e-06	2	robo; tup; stumps; srp; EcR; Mef2; pnt
embryo	GO:0006351	6.46079e-07	4.95117	4.84361	18	1004	transcription, DNA-templated	4.47748e-06	2	Brms1; dik; GATAd; YL-1; tup; grn; srp; pygo; ttk; EcR; Mef2; pnt; Ada2b; seq; MED21; jing; not; pros
embryo	GO:0097659	6.46079e-07	4.95117	4.84361	18	1004	nucleic acid-templated transcription	4.47748e-06	2	Brms1; dik; GATAd; YL-1; tup; grn; srp; pygo; ttk; EcR; Mef2; pnt; Ada2b; seq; MED21; jing; not; pros
embryo	GO:0032774	6.75056e-07	4.93485	4.85808	18	1007	RNA biosynthetic process	4.49152e-06	2	Brms1; dik; GATAd; YL-1; tup; grn; srp; pygo; ttk; EcR; Mef2; pnt; Ada2b; seq; MED21; jing; not; pros
embryo	GO:0048754	7.08394e-07	22.8093	0.318405	6	66	branching morphogenesis of an epithelial tube	4.49152e-06	2	trn; stumps; ttk; pnt; seq; pyd
embryo	GO:0060446	7.08394e-07	22.8093	0.318405	6	66	branching involved in open tracheal system development	4.49152e-06	2	trn; stumps; ttk; pnt; seq; pyd
embryo	GO:0061138	7.08394e-07	22.8093	0.318405	6	66	morphogenesis of a branching epithelium	4.49152e-06	2	trn; stumps; ttk; pnt; seq; pyd
embryo	GO:0007444	7.28359e-07	5.71603	3.36255	15	697	imaginal disc development	4.49318e-06	2	trn; Traf4; tup; pygo; ttk; EcR; par-1; Pkn; pnt; Ada2b; Glut4EF; jing; d; pyd; CG43658
embryo	GO:0050789	7.38812e-07	3.65104	15.9106	34	3298	regulation of biological process	4.49318e-06	2	Tsp3A; robo; Brms1; dik; Traf4; CG31559; Fip1; GATAd; YL-1; tup; RanGAP; grn; stumps; srp; pygo; ttk; EcR; par-1; ADD1; Vhl; Mef2; Pkn; pnt; Ada2b; seq; Ext2; MED21; jing; not; kon; d; pros; pyd; CG43658
embryo	GO:0010628	8.83351e-07	7.82916	1.71746	11	356	positive regulation of gene expression	5.26477e-06	2	Brms1; dik; tup; srp; pygo; ttk; EcR; Mef2; pnt; jing; pros
embryo	GO:0001763	9.24248e-07	21.7178	0.332878	6	69	morphogenesis of a branching structure	5.40051e-06	2	trn; stumps; ttk; pnt; seq; pyd
embryo	GO:0009653	1.01731e-06	3.92895	9.3061	25	1929	anatomical structure morphogenesis	5.82996e-06	2	robo; trn; Traf4; tup; grn; stumps; srp; pygo; ttk; EcR; par-1; Vhl; Mef2; Pkn; pnt; Ada2b; seq; Glut4EF; jing; not; kon; d; pros; pyd; CG43658
embryo	GO:0000904	1.03701e-06	6.37083	2.54724	13	528	cell morphogenesis involved in differentiation	5.83074e-06	2	robo; trn; Traf4; tup; grn; pygo; ttk; EcR; Ada2b; seq; jing; not; pros
embryo	GO:0030030	1.11712e-06	5.51039	3.47833	15	721	cell projection organization	6.16485e-06	2	robo; trn; tup; grn; pygo; ttk; EcR; par-1; Ada2b; seq; jing; not; kon; pros; pyd
embryo	GO:0050794	1.16231e-06	3.59271	14.5646	32	3019	regulation of cellular process	6.29758e-06	2	Tsp3A; robo; Brms1; dik; Traf4; CG31559; Fip1; GATAd; YL-1; tup; grn; stumps; srp; pygo; ttk; EcR; par-1; ADD1; Vhl; Mef2; Pkn; pnt; Ada2b; seq; Ext2; MED21; jing; not; kon; pros; pyd; CG43658
embryo	GO:0007424	1.31021e-06	9.79694	1.09994	9	228	open tracheal system development	6.97217e-06	2	robo; trn; stumps; ttk; Vhl; pnt; seq; jing; pyd
embryo	GO:0051171	1.5576e-06	4.45992	5.71199	19	1184	regulation of nitrogen compound metabolic process	8.14323e-06	2	Brms1; dik; GATAd; YL-1; tup; grn; srp; pygo; ttk; EcR; ADD1; Mef2; pnt; Ada2b; seq; MED21; jing; not; pros
embryo	GO:0010468	1.81363e-06	4.40972	5.76988	19	1196	regulation of gene expression	8.95665e-06	2	Brms1; dik; GATAd; YL-1; tup; grn; srp; pygo; ttk; EcR; ADD1; Mef2; pnt; Ada2b; seq; MED21; jing; not; pros
embryo	GO:0045893	1.83341e-06	8.13468	1.48106	10	307	positive regulation of transcription, DNA-templated	8.95665e-06	2	Brms1; dik; tup; srp; pygo; ttk; EcR; Mef2; pnt; jing
embryo	GO:1902680	1.83341e-06	8.13468	1.48106	10	307	positive regulation of RNA biosynthetic process	8.95665e-06	2	Brms1; dik; tup; srp; pygo; ttk; EcR; Mef2; pnt; jing
embryo	GO:1903508	1.83341e-06	8.13468	1.48106	10	307	positive regulation of nucleic acid-templated transcription	8.95665e-06	2	Brms1; dik; tup; srp; pygo; ttk; EcR; Mef2; pnt; jing
embryo	GO:0031325	1.9235e-06	6.00492	2.69197	13	558	positive regulation of cellular metabolic process	9.24521e-06	2	Brms1; dik; Traf4; Fip1; tup; srp; pygo; ttk; EcR; Mef2; pnt; Ada2b; jing
embryo	GO:0048569	2.08238e-06	5.95915	2.71126	13	562	post-embryonic organ development	9.84998e-06	2	trn; Traf4; srp; pygo; ttk; EcR; par-1; Pkn; pnt; Glut4EF; jing; d; CG43658
embryo	GO:0048731	2.14552e-06	3.58909	11.8389	28	2454	system development	9.99007e-06	2	robo; trn; Traf4; tup; RanGAP; grn; stumps; srp; pygo; ttk; EcR; par-1; Vhl; CG12343; Mef2; Pkn; pnt; Ada2b; seq; Glut4EF; jing; not; kon; smid; d; pros; pyd; CG43658
embryo	GO:0060541	2.37561e-06	9.07851	1.18196	9	245	respiratory system development	1.07343e-05	2	robo; trn; stumps; ttk; Vhl; pnt; seq; jing; pyd
embryo	GO:0051254	2.37739e-06	7.88954	1.52448	10	316	positive regulation of RNA metabolic process	1.07343e-05	2	Brms1; dik; tup; srp; pygo; ttk; EcR; Mef2; pnt; jing
embryo	GO:0006357	2.46273e-06	6.36165	2.31567	12	480	regulation of transcription from RNA polymerase II promoter	1.08831e-05	2	tup; grn; pygo; ttk; EcR; Mef2; pnt; Ada2b; seq; MED21; jing; pros
embryo	GO:0048812	2.48339e-06	5.85858	2.75468	13	571	neuron projection morphogenesis	1.08831e-05	2	robo; trn; tup; grn; pygo; ttk; EcR; Ada2b; seq; jing; not; pros; pyd
embryo	GO:0048667	2.57134e-06	6.33351	2.32532	12	482	cell morphogenesis involved in neuron differentiation	1.11052e-05	2	robo; trn; tup; grn; pygo; ttk; EcR; Ada2b; seq; jing; not; pros
embryo	GO:0000902	3.22436e-06	5.02468	3.78709	15	785	cell morphogenesis	1.37266e-05	2	robo; trn; Traf4; tup; grn; pygo; ttk; EcR; par-1; Ada2b; seq; jing; not; pros; pyd
embryo	GO:0031175	3.43261e-06	5.67719	2.8367	13	588	neuron projection development	1.44073e-05	2	robo; trn; tup; grn; pygo; ttk; EcR; Ada2b; seq; jing; not; pros; pyd
embryo	GO:0007560	3.53065e-06	6.1299	2.39768	12	497	imaginal disc morphogenesis	1.44128e-05	2	trn; Traf4; pygo; ttk; EcR; par-1; Pkn; pnt; Glut4EF; jing; d; CG43658
embryo	GO:0048563	3.53065e-06	6.1299	2.39768	12	497	post-embryonic organ morphogenesis	1.44128e-05	2	trn; Traf4; pygo; ttk; EcR; par-1; Pkn; pnt; Glut4EF; jing; d; CG43658
embryo	GO:0010557	3.90019e-06	7.44012	1.61132	10	334	positive regulation of macromolecule biosynthetic process	1.57062e-05	2	Brms1; dik; tup; srp; pygo; ttk; EcR; Mef2; pnt; jing
embryo	GO:0032989	4.13545e-06	4.67073	4.39013	16	910	cellular component morphogenesis	1.64315e-05	2	robo; trn; Traf4; tup; grn; pygo; ttk; EcR; par-1; Ada2b; seq; jing; not; kon; pros; pyd
embryo	GO:0045935	4.56867e-06	7.30121	1.64027	10	340	positive regulation of nucleobase-containing compound metabolic process	1.7914e-05	2	Brms1; dik; tup; srp; pygo; ttk; EcR; Mef2; pnt; jing
embryo	GO:0048707	4.69858e-06	5.9509	2.46522	12	511	instar larval or pupal morphogenesis	1.81841e-05	2	trn; Traf4; pygo; ttk; EcR; par-1; Pkn; pnt; Glut4EF; jing; d; CG43658
embryo	GO:0034654	4.87823e-06	4.23671	5.57208	18	1155	nucleobase-containing compound biosynthetic process	1.86373e-05	2	Brms1; dik; GATAd; YL-1; tup; grn; srp; pygo; ttk; EcR; Mef2; pnt; Ada2b; seq; MED21; jing; not; pros
embryo	GO:0006366	5.29561e-06	5.87723	2.49417	12	517	transcription from RNA polymerase II promoter	1.99759e-05	2	tup; grn; pygo; ttk; EcR; Mef2; pnt; Ada2b; seq; MED21; jing; pros
embryo	GO:0048666	5.65118e-06	5.06163	3.45421	14	716	neuron development	2.10506e-05	2	robo; trn; tup; grn; pygo; ttk; EcR; pnt; Ada2b; seq; jing; not; pros; pyd
embryo	GO:0009886	5.84328e-06	5.81716	2.51829	12	522	post-embryonic morphogenesis	2.14975e-05	2	trn; Traf4; pygo; ttk; EcR; par-1; Pkn; pnt; Glut4EF; jing; d; CG43658
embryo	GO:0065007	5.97203e-06	3.24514	17.3145	34	3589	biological regulation	2.17032e-05	2	Tsp3A; robo; Brms1; dik; Traf4; CG31559; Fip1; GATAd; YL-1; tup; RanGAP; grn; stumps; srp; pygo; ttk; EcR; par-1; ADD1; Vhl; Mef2; Pkn; pnt; Ada2b; seq; Ext2; MED21; jing; not; kon; d; pros; pyd; CG43658
embryo	GO:0022008	6.1165e-06	3.90149	6.87947	20	1426	neurogenesis	2.19605e-05	2	robo; trn; tup; RanGAP; grn; stumps; pygo; ttk; EcR; par-1; CG12343; pnt; Ada2b; seq; jing; not; kon; smid; pros; pyd
embryo	GO:0030182	6.28973e-06	4.73505	3.99936	15	829	neuron differentiation	2.23136e-05	2	robo; trn; tup; grn; pygo; ttk; EcR; par-1; pnt; Ada2b; seq; jing; not; pros; pyd
embryo	GO:0001708	7.72522e-06	14.6762	0.477607	6	99	cell fate specification	2.70528e-05	2	tup; ttk; pnt; seq; pros; pyd
embryo	GO:0048858	7.80718e-06	5.23617	3.05862	13	634	cell projection morphogenesis	2.70528e-05	2	robo; trn; tup; grn; pygo; ttk; EcR; Ada2b; seq; jing; not; pros; pyd
embryo	GO:0007552	7.94651e-06	5.6326	2.59548	12	538	metamorphosis	2.72191e-05	2	trn; Traf4; pygo; ttk; EcR; par-1; Pkn; pnt; Glut4EF; jing; d; CG43658
embryo	GO:0032990	8.93957e-06	5.16605	3.09721	13	642	cell part morphogenesis	3.02726e-05	2	robo; trn; tup; grn; pygo; ttk; EcR; Ada2b; seq; jing; not; pros; pyd
embryo	GO:0050896	9.59273e-06	3.23845	13.5226	29	2803	response to stimulus	3.21195e-05	2	Tsp3A; robo; Brms1; trn; Traf4; Fip1; Fic; tup; grn; stumps; srp; trem; pygo; ttk; EcR; par-1; Vhl; CG12744; Mef2; Pkn; pnt; seq; Ext2; jing; not; smid; pros; pyd; CG43658
embryo	GO:0009790	1.00473e-05	5.10615	3.13098	13	649	embryo development	3.32676e-05	2	robo; Traf4; tup; stumps; srp; pygo; ttk; EcR; par-1; Pkn; pnt; jing; pyd
embryo	GO:0019438	1.07457e-05	3.9771	5.89531	18	1222	aromatic compound biosynthetic process	3.51891e-05	2	Brms1; dik; GATAd; YL-1; tup; grn; srp; pygo; ttk; EcR; Mef2; pnt; Ada2b; seq; MED21; jing; not; pros
embryo	GO:0006139	1.09742e-05	3.42018	9.85607	24	2043	nucleobase-containing compound metabolic process	3.55469e-05	2	Es2; CG11486; Brms1; dik; Fip1; GATAd; YL-1; CG16865; tup; grn; srp; trem; pygo; ttk; EcR; CG12343; Mef2; pnt; Ada2b; seq; MED21; jing; not; pros
embryo	GO:0018130	1.13716e-05	3.95888	5.91943	18	1227	heterocycle biosynthetic process	3.639e-05	2	Brms1; dik; GATAd; YL-1; tup; grn; srp; pygo; ttk; EcR; Mef2; pnt; Ada2b; seq; MED21; jing; not; pros
embryo	GO:0009891	1.16008e-05	6.52663	1.82359	10	378	positive regulation of biosynthetic process	3.639e-05	2	Brms1; dik; tup; srp; pygo; ttk; EcR; Mef2; pnt; jing
embryo	GO:0031328	1.16008e-05	6.52663	1.82359	10	378	positive regulation of cellular biosynthetic process	3.639e-05	2	Brms1; dik; tup; srp; pygo; ttk; EcR; Mef2; pnt; jing
embryo	GO:0051173	1.21466e-05	6.49027	1.83324	10	380	positive regulation of nitrogen compound metabolic process	3.77051e-05	2	Brms1; dik; tup; srp; pygo; ttk; EcR; Mef2; pnt; jing
embryo	GO:0007472	1.42354e-05	6.36605	1.86701	10	387	wing disc morphogenesis	4.37336e-05	2	trn; pygo; ttk; EcR; par-1; Pkn; pnt; Glut4EF; jing; d
embryo	GO:0045165	1.62056e-05	5.67468	2.32532	11	482	cell fate commitment	4.92781e-05	2	Traf4; CG15439; tup; srp; ttk; EcR; par-1; pnt; seq; pros; pyd
embryo	GO:0048468	1.65616e-05	3.52776	8.00836	21	1660	cell development	4.98522e-05	2	Tsp3A; robo; trn; Traf4; tup; grn; stumps; srp; pygo; ttk; EcR; par-1; Mef2; pnt; Ada2b; seq; jing; not; kon; pros; pyd
embryo	GO:1901362	1.75018e-05	3.82177	6.10758	18	1266	organic cyclic compound biosynthetic process	5.21554e-05	2	Brms1; dik; GATAd; YL-1; tup; grn; srp; pygo; ttk; EcR; Mef2; pnt; Ada2b; seq; MED21; jing; not; pros
embryo	GO:0009791	1.78906e-05	4.81779	3.30466	13	685	post-embryonic development	5.27862e-05	2	trn; Traf4; srp; pygo; ttk; EcR; par-1; Pkn; pnt; Glut4EF; jing; d; CG43658
embryo	GO:0048699	1.92696e-05	4.27635	4.39013	15	910	generation of neurons	5.62976e-05	2	robo; trn; tup; grn; pygo; ttk; EcR; par-1; pnt; Ada2b; seq; jing; not; pros; pyd
embryo	GO:0007409	2.00707e-05	6.86926	1.53896	9	319	axonogenesis	5.80687e-05	2	robo; trn; tup; grn; Ada2b; seq; jing; not; pros
embryo	GO:0046483	2.33405e-05	3.24392	10.2951	24	2134	heterocycle metabolic process	6.68795e-05	2	Es2; CG11486; Brms1; dik; Fip1; GATAd; YL-1; CG16865; tup; grn; srp; trem; pygo; ttk; EcR; CG12343; Mef2; pnt; Ada2b; seq; MED21; jing; not; pros
embryo	GO:0030155	2.56865e-05	27.5558	0.173675	4	36	regulation of cell adhesion	7.29007e-05	2	robo; pygo; par-1; pyd
embryo	GO:0061564	2.62352e-05	6.62782	1.59202	9	330	axon development	7.3153e-05	2	robo; trn; tup; grn; Ada2b; seq; jing; not; pros
embryo	GO:0044260	2.62664e-05	2.97285	17.5557	33	3639	cellular macromolecule metabolic process	7.3153e-05	2	Es2; Ppa; CG11486; Brms1; dik; Traf4; Fip1; Fic; GATAd; YL-1; CG16865; tup; grn; srp; trem; pygo; ttk; EcR; par-1; CG30100; Vhl; CG12343; Mef2; Pkn; pnt; Ada2b; seq; Ext2; MED21; jing; not; pros; pyd
embryo	GO:0007411	2.84861e-05	7.55528	1.2302	8	255	axon guidance	7.86005e-05	2	robo; trn; tup; grn; seq; jing; not; pros
embryo	GO:0006725	3.10545e-05	3.17832	10.4688	24	2170	cellular aromatic compound metabolic process	8.49013e-05	2	Es2; CG11486; Brms1; dik; Fip1; GATAd; YL-1; CG16865; tup; grn; srp; trem; pygo; ttk; EcR; CG12343; Mef2; pnt; Ada2b; seq; MED21; jing; not; pros
embryo	GO:0002165	3.17663e-05	4.85602	2.98143	12	618	instar larval or pupal development	8.60579e-05	2	trn; Traf4; pygo; ttk; EcR; par-1; Pkn; pnt; Glut4EF; jing; d; CG43658
embryo	GO:0009605	3.4414e-05	4.05101	4.61204	15	956	response to external stimulus	9.23908e-05	2	robo; trn; Traf4; Fic; tup; grn; ttk; par-1; CG12744; Mef2; seq; jing; not; smid; pros
embryo	GO:0097485	3.5516e-05	7.31342	1.26879	8	263	neuron projection guidance	9.4498e-05	2	robo; trn; tup; grn; seq; jing; not; pros
embryo	GO:0035120	3.59051e-05	5.67981	2.07928	10	431	post-embryonic appendage morphogenesis	9.46877e-05	2	trn; pygo; ttk; EcR; par-1; pnt; Glut4EF; jing; d; CG43658
embryo	GO:0048598	3.6489e-05	7.28425	1.27362	8	264	embryonic morphogenesis	9.53834e-05	2	Traf4; tup; stumps; srp; EcR; Pkn; pnt; pyd
embryo	GO:0035114	4.19687e-05	5.57016	2.11787	10	439	imaginal disc-derived appendage morphogenesis	0.000108754	2	trn; pygo; ttk; EcR; par-1; pnt; Glut4EF; jing; d; CG43658
embryo	GO:0007427	4.33728e-05	23.8224	0.197797	4	41	epithelial cell migration, open tracheal system	0.000111088	2	robo; stumps; Vhl; pnt
embryo	GO:0035107	4.36149e-05	5.54339	2.12752	10	441	appendage morphogenesis	0.000111088	2	trn; pygo; ttk; EcR; par-1; pnt; Glut4EF; jing; d; CG43658
embryo	GO:0048737	4.53162e-05	5.51686	2.13717	10	443	imaginal disc-derived appendage development	0.000114443	2	trn; pygo; ttk; EcR; par-1; pnt; Glut4EF; jing; d; CG43658
embryo	GO:0048736	4.88899e-05	5.46453	2.15647	10	447	appendage development	0.00012243	2	trn; pygo; ttk; EcR; par-1; pnt; Glut4EF; jing; d; CG43658
embryo	GO:0006935	5.00174e-05	6.95121	1.33151	8	276	chemotaxis	0.00012421	2	robo; trn; tup; grn; seq; jing; not; pros
embryo	GO:0007399	5.40453e-05	3.2943	7.96494	20	1651	nervous system development	0.000132497	2	robo; trn; tup; RanGAP; grn; stumps; pygo; ttk; EcR; par-1; CG12343; pnt; Ada2b; seq; jing; not; kon; smid; pros; pyd
embryo	GO:1901360	5.42437e-05	3.05183	10.8209	24	2243	organic cyclic compound metabolic process	0.000132497	2	Es2; CG11486; Brms1; dik; Fip1; GATAd; YL-1; CG16865; tup; grn; srp; trem; pygo; ttk; EcR; CG12343; Mef2; pnt; Ada2b; seq; MED21; jing; not; pros
embryo	GO:0030154	6.25427e-05	2.97858	11.67	25	2419	cell differentiation	0.000151526	2	Tsp3A; robo; trn; Traf4; CG15439; tup; RanGAP; grn; stumps; srp; pygo; ttk; EcR; par-1; CG12343; Mef2; pnt; Ada2b; seq; jing; not; kon; smid; pros; pyd
embryo	GO:0048584	7.2467e-05	5.77496	1.81394	9	376	positive regulation of response to stimulus	0.000173713	2	Tsp3A; Brms1; Traf4; Fip1; pygo; EcR; par-1; Pkn; CG43658
embryo	GO:0001709	7.28661e-05	9.64224	0.709174	6	147	cell fate determination	0.000173713	2	Traf4; tup; srp; ttk; par-1; pros
embryo	GO:0016043	7.39122e-05	2.87767	13.3489	27	2767	cellular component organization	0.000174808	2	robo; Cnb; dik; trn; Traf4; Cwc25; YL-1; tup; RanGAP; grn; trem; pygo; ttk; EcR; par-1; CG30100; ADD1; Vhl; Pkn; His1:CG33801; Ada2b; seq; jing; not; kon; pros; pyd
embryo	GO:0008258	7.47605e-05	20.4884	0.226743	4	47	head involution	0.000175422	2	tup; srp; EcR; pyd
embryo	GO:0007476	8.02055e-05	5.69497	1.83806	9	381	imaginal disc-derived wing morphogenesis	0.000184495	2	trn; pygo; ttk; EcR; par-1; pnt; Glut4EF; jing; d
embryo	GO:0045944	8.10326e-05	7.61531	1.0517	7	218	positive regulation of transcription from RNA polymerase II promoter	0.000184495	2	tup; pygo; ttk; EcR; Mef2; pnt; jing
embryo	GO:0048813	8.10326e-05	7.61531	1.0517	7	218	dendrite morphogenesis	0.000184495	2	robo; tup; pygo; ttk; EcR; seq; pros
embryo	GO:0010467	8.11036e-05	2.96189	11.0863	24	2298	gene expression	0.000184495	2	Es2; CG11486; Brms1; dik; Fip1; GATAd; YL-1; CG16865; tup; grn; srp; pygo; ttk; EcR; CG30100; CG12343; Mef2; pnt; Ada2b; seq; MED21; jing; not; pros
embryo	GO:0007155	9.60706e-05	7.4011	1.08065	7	224	cell adhesion	0.000216887	2	robo; trn; pygo; EcR; par-1; pnt; pyd
embryo	GO:0016358	9.8785e-05	7.36654	1.08547	7	225	dendrite development	0.000221338	2	robo; tup; pygo; ttk; EcR; seq; pros
embryo	GO:0071840	0.000113346	2.79074	13.6673	27	2833	cellular component organization or biogenesis	0.000252067	2	robo; Cnb; dik; trn; Traf4; Cwc25; YL-1; tup; RanGAP; grn; trem; pygo; ttk; EcR; par-1; CG30100; ADD1; Vhl; Pkn; His1:CG33801; Ada2b; seq; jing; not; kon; pros; pyd
embryo	GO:0048869	0.000124588	2.83051	12.1524	25	2519	cellular developmental process	0.000275016	2	Tsp3A; robo; trn; Traf4; CG15439; tup; RanGAP; grn; stumps; srp; pygo; ttk; EcR; par-1; CG12343; Mef2; pnt; Ada2b; seq; jing; not; kon; smid; pros; pyd
embryo	GO:0035146	0.000133461	36.1374	0.101311	3	21	tube fusion	0.000290303	2	trn; ttk; pyd
embryo	GO:0035147	0.000133461	36.1374	0.101311	3	21	branch fusion, open tracheal system	0.000290303	2	trn; ttk; pyd
embryo	GO:0098609	0.000147224	11.1609	0.506553	5	105	cell-cell adhesion	0.000316441	2	robo; pygo; par-1; pnt; pyd
embryo	GO:0022610	0.000147602	6.8838	1.15784	7	240	biological adhesion	0.000316441	2	robo; trn; pygo; EcR; par-1; pnt; pyd
embryo	GO:0007391	0.000153945	11.0495	0.511377	5	106	dorsal closure	0.000325485	2	Traf4; tup; srp; Pkn; pyd
embryo	GO:0007390	0.000154005	34.2327	0.106135	3	22	germ-band shortening	0.000325485	2	tup; srp; EcR
embryo	GO:0044763	0.000170795	2.71821	27.7832	42	5759	single-organism cellular process	0.000356216	2	Tsp3A; robo; Cnb; CG11537; Brms1; dik; trn; Traf4; CG15439; Cwc25; CG31559; Fip1; YL-1; tup; RanGAP; CG33116; grn; stumps; srp; trem; pygo; ttk; EcR; par-1; CG30100; ADD1; Vhl; CG12343; Mef2; Pkn; pnt; Ada2b; seq; Ext2; jing; not; kon; smid; d; pros; pyd; CG43658
embryo	GO:0045466	0.000170936	16.3003	0.27981	4	58	R7 cell differentiation	0.000356216	2	ttk; pnt; seq; pros
embryo	GO:0022407	0.000176498	32.5184	0.110959	3	23	regulation of cell-cell adhesion	0.000357799	2	robo; pygo; par-1
embryo	GO:0035050	0.000176498	32.5184	0.110959	3	23	embryonic heart tube development	0.000357799	2	robo; srp; EcR
embryo	GO:0045467	0.000176498	32.5184	0.110959	3	23	R7 cell development	0.000357799	2	ttk; pnt; seq
embryo	GO:0070983	0.000176498	32.5184	0.110959	3	23	dendrite guidance	0.000357799	2	robo; tup; pros
embryo	GO:0008045	0.000207998	15.4386	0.294283	4	61	motor neuron axon guidance	0.000418807	2	robo; trn; tup; grn
embryo	GO:0042330	0.000225889	5.5302	1.65474	8	343	taxis	0.00044927	2	robo; trn; tup; grn; seq; jing; not; pros
embryo	GO:0046665	0.000226752	142.23	0.0241216	2	5	amnioserosa maintenance	0.00044927	2	tup; srp
embryo	GO:0007426	0.00022765	29.5574	0.120608	3	25	tracheal outgrowth, open tracheal system	0.00044927	2	stumps; ttk; pnt
embryo	GO:0009967	0.000247215	6.30374	1.25915	7	261	positive regulation of signal transduction	0.000484671	2	Tsp3A; Brms1; Traf4; Fip1; pygo; par-1; CG43658
embryo	GO:0009987	0.000249515	3.10119	37.0942	50	7689	cellular process	0.000484794	2	Tsp3A; Es2; robo; Ppa; Cnb; CG11486; CG11537; Brms1; dik; trn; Traf4; CG15439; Cwc25; CG31559; Fip1; Fic; GATAd; YL-1; CG16865; tup; RanGAP; CG33116; grn; stumps; srp; trem; pygo; ttk; EcR; par-1; CG30100; ADD1; Vhl; CG12343; Mef2; Pkn; pnt; His1:CG33801; Ada2b; seq; Ext2; MED21; jing; not; kon; smid; d; pros; pyd; CG43658
embryo	GO:0016337	0.000250531	14.6631	0.308756	4	64	single organismal cell-cell adhesion	0.000484794	2	robo; pygo; par-1; pyd
embryo	GO:0002064	0.000259064	5.41386	1.68851	8	350	epithelial cell development	0.000498072	2	Tsp3A; Traf4; ttk; EcR; par-1; Mef2; pnt; jing
embryo	GO:0007275	0.000326517	2.55978	15.3461	28	3181	multicellular organismal development	0.000623732	2	robo; trn; Traf4; tup; RanGAP; grn; stumps; srp; pygo; ttk; EcR; par-1; Vhl; CG12343; Mef2; Pkn; pnt; Ada2b; seq; Glut4EF; jing; not; kon; smid; d; pros; pyd; CG43658
embryo	GO:0007298	0.000332237	9.28561	0.603039	5	125	border follicle cell migration	0.000630616	2	Tsp3A; ttk; EcR; par-1; jing
embryo	GO:0098602	0.000353831	13.3236	0.337702	4	70	single organism cell adhesion	0.000667353	2	robo; pygo; par-1; pyd
embryo	GO:2000026	0.000363646	4.60291	2.24813	9	466	regulation of multicellular organismal development	0.000681551	2	robo; ttk; EcR; par-1; Mef2; pnt; d; pros; pyd
embryo	GO:0045595	0.000430154	5.72706	1.37975	7	286	regulation of cell differentiation	0.000801162	2	robo; srp; ttk; EcR; par-1; pnt; pros
embryo	GO:0023056	0.000439261	5.70613	1.38458	7	287	positive regulation of signaling	0.000813042	2	Tsp3A; Brms1; Traf4; Fip1; pygo; par-1; CG43658
embryo	GO:0016331	0.000457565	8.63143	0.646458	5	134	morphogenesis of embryonic epithelium	0.000841694	2	Traf4; tup; srp; Pkn; pyd
embryo	GO:0007166	0.000490666	4.04597	2.86082	10	593	cell surface receptor signaling pathway	0.000897046	2	Tsp3A; robo; Brms1; tup; stumps; pygo; par-1; pnt; Ext2; pyd
embryo	GO:0010647	0.000507426	5.56374	1.41835	7	294	positive regulation of cell communication	0.00092203	2	Tsp3A; Brms1; Traf4; Fip1; pygo; par-1; CG43658
embryo	GO:0042659	0.000525413	21.6614	0.159202	3	33	regulation of cell fate specification	0.000948927	2	ttk; pnt; pros
embryo	GO:0007297	0.00054103	8.30597	0.67058	5	139	ovarian follicle cell migration	0.000971246	2	Tsp3A; ttk; EcR; par-1; jing
embryo	GO:0007154	0.000586083	2.74088	8.72719	19	1809	cell communication	0.00104582	2	Tsp3A; robo; Brms1; Traf4; CG15439; Fip1; tup; stumps; pygo; EcR; par-1; Pkn; pnt; Ada2b; Ext2; not; smid; pyd; CG43658
embryo	GO:0010453	0.000625979	20.3043	0.168851	3	35	regulation of cell fate commitment	0.00111037	2	ttk; pnt; pros
embryo	GO:0030855	0.000641834	4.69133	1.93455	8	401	epithelial cell differentiation	0.00113175	2	Tsp3A; Traf4; ttk; EcR; par-1; Mef2; pnt; jing
embryo	GO:0042063	0.000646531	11.2628	0.395594	4	82	gliogenesis	0.00113333	2	stumps; jing; not; pros
embryo	GO:0006909	0.00070998	6.19725	1.08065	6	224	phagocytosis	0.00123437	2	Tsp3A; Traf4; srp; EcR; pnt; pros
embryo	GO:0034645	0.000712452	2.63978	9.60521	20	1991	cellular macromolecule biosynthetic process	0.00123437	2	Brms1; dik; GATAd; YL-1; tup; grn; srp; pygo; ttk; EcR; CG30100; Mef2; pnt; Ada2b; seq; Ext2; MED21; jing; not; pros
embryo	GO:0009059	0.00075074	2.62708	9.6438	20	1999	macromolecule biosynthetic process	0.00129318	2	Brms1; dik; GATAd; YL-1; tup; grn; srp; pygo; ttk; EcR; CG30100; Mef2; pnt; Ada2b; seq; Ext2; MED21; jing; not; pros
embryo	GO:0001700	0.000778804	6.08358	1.09994	6	228	embryonic development via the syncytial blastoderm	0.00133381	2	Traf4; tup; srp; EcR; Pkn; pyd
embryo	GO:0048856	0.000809403	2.37171	17.0298	29	3530	anatomical structure development	0.0013783	2	Tsp3A; robo; trn; Traf4; tup; RanGAP; grn; stumps; srp; pygo; ttk; EcR; par-1; Vhl; CG12343; Mef2; Pkn; pnt; Ada2b; seq; Glut4EF; jing; not; kon; smid; d; pros; pyd; CG43658
embryo	GO:0043170	0.000848859	2.33634	20.6674	33	4284	macromolecule metabolic process	0.00143727	2	Es2; Ppa; CG11486; Brms1; dik; Traf4; Fip1; Fic; GATAd; YL-1; CG16865; tup; grn; srp; trem; pygo; ttk; EcR; par-1; CG30100; Vhl; CG12343; Mef2; Pkn; pnt; Ada2b; seq; Ext2; MED21; jing; not; pros; pyd
embryo	GO:0010001	0.000862184	18.0424	0.188148	3	39	glial cell differentiation	0.00145011	2	stumps; not; pros
embryo	GO:0048646	0.000866176	3.74172	3.07791	10	638	anatomical structure formation involved in morphogenesis	0.00145011	2	robo; Traf4; stumps; srp; ttk; EcR; par-1; Vhl; Mef2; kon
embryo	GO:0048583	0.000872858	3.3107	4.25022	12	881	regulation of response to stimulus	0.00145314	2	Tsp3A; Brms1; Traf4; Fip1; pygo; EcR; par-1; Vhl; Pkn; pnt; pyd; CG43658
embryo	GO:0030707	0.000885234	5.04102	1.55825	7	323	ovarian follicle cell development	0.00146555	2	Tsp3A; ttk; EcR; par-1; Mef2; pnt; jing
embryo	GO:0002066	0.000901402	5.0247	1.56308	7	324	columnar/cuboidal epithelial cell development	0.00148408	2	Tsp3A; ttk; EcR; par-1; Mef2; pnt; jing
embryo	GO:0002065	0.00100339	4.92891	1.59202	7	330	columnar/cuboidal epithelial cell differentiation	0.00160959	2	Tsp3A; ttk; EcR; par-1; Mef2; pnt; jing
embryo	GO:0035065	0.00100464	53.3147	0.0482431	2	10	regulation of histone acetylation	0.00160959	2	dik; Ada2b
embryo	GO:0060232	0.00100464	53.3147	0.0482431	2	10	delamination	0.00160959	2	pygo; par-1
embryo	GO:1901983	0.00100464	53.3147	0.0482431	2	10	regulation of protein acetylation	0.00160959	2	dik; Ada2b
embryo	GO:2000756	0.00100464	53.3147	0.0482431	2	10	regulation of peptidyl-lysine acetylation	0.00160959	2	dik; Ada2b
embryo	GO:0051239	0.00103473	3.64977	3.15028	10	653	regulation of multicellular organismal process	0.00164892	2	robo; srp; ttk; EcR; par-1; Mef2; pnt; d; pros; pyd
embryo	GO:0009792	0.0010612	5.7161	1.16748	6	242	embryo development ending in birth or egg hatching	0.00168211	2	Traf4; tup; srp; EcR; Pkn; pyd
embryo	GO:0060322	0.00111054	7.03049	0.786363	5	163	head development	0.00175101	2	robo; ttk; EcR; jing; pros
embryo	GO:0034641	0.00112167	2.37363	13.9326	25	2888	cellular nitrogen compound metabolic process	0.00175926	2	Es2; CG11486; Brms1; dik; Fip1; GATAd; YL-1; CG16865; tup; grn; srp; trem; pygo; ttk; EcR; CG30100; CG12343; Mef2; pnt; Ada2b; seq; MED21; jing; not; pros
embryo	GO:0008105	0.00114844	16.2329	0.207446	3	43	asymmetric protein localization	0.0017918	2	Traf4; par-1; pyd
embryo	GO:0050793	0.00118827	3.57924	3.20817	10	665	regulation of developmental process	0.0018443	2	robo; srp; ttk; EcR; par-1; Mef2; pnt; d; pros; pyd
embryo	GO:0022408	0.00122409	47.387	0.0530675	2	11	negative regulation of cell-cell adhesion	0.00187703	2	pygo; par-1
embryo	GO:0048747	0.00122409	47.387	0.0530675	2	11	muscle fiber development	0.00187703	2	Mef2; pnt
embryo	GO:0060438	0.00122826	15.8357	0.21227	3	44	trachea development	0.00187703	2	Vhl; pnt; pyd
embryo	GO:0045596	0.00135897	9.13765	0.482431	4	100	negative regulation of cell differentiation	0.00206619	2	srp; EcR; pnt; pros
embryo	GO:0044707	0.00139315	2.26054	18.4578	30	3826	single-multicellular organism process	0.0021074	2	Tsp3A; robo; trn; Traf4; Fic; tup; RanGAP; grn; stumps; srp; pygo; ttk; EcR; par-1; Vhl; CG12343; Mef2; Pkn; pnt; Ada2b; seq; Glut4EF; jing; not; kon; smid; d; pros; pyd; CG43658
embryo	GO:0007422	0.00140995	9.04271	0.487256	4	101	peripheral nervous system development	0.00212205	2	ttk; EcR; pnt; pros
embryo	GO:0006611	0.00146435	42.6448	0.0578918	2	12	protein export from nucleus	0.00218188	2	RanGAP; Vhl
embryo	GO:0042676	0.00146435	42.6448	0.0578918	2	12	compound eye cone cell fate commitment	0.00218188	2	ttk; pros
embryo	GO:0007165	0.00148938	2.75937	6.508	15	1349	signal transduction	0.00220813	2	Tsp3A; robo; Brms1; Traf4; Fip1; tup; stumps; pygo; EcR; par-1; Pkn; pnt; Ext2; pyd; CG43658
embryo	GO:0051716	0.00155677	2.54476	8.69341	18	1802	cellular response to stimulus	0.00229662	2	Tsp3A; robo; Brms1; Traf4; Fip1; tup; stumps; trem; pygo; EcR; par-1; Vhl; Pkn; pnt; Ext2; smid; pyd; CG43658
embryo	GO:0031399	0.00159416	5.26085	1.26397	6	262	regulation of protein modification process	0.0023402	2	dik; Traf4; Fip1; par-1; Ada2b; pyd
embryo	GO:0051179	0.00167905	2.43433	10.271	20	2129	localization	0.00244367	2	Tsp3A; robo; Cnb; CG11537; trn; Traf4; Fic; RanGAP; stumps; srp; ttk; EcR; par-1; Vhl; Mef2; pnt; jing; not; pros; pyd
embryo	GO:0044767	0.00168105	2.2257	18.6556	30	3867	single-organism developmental process	0.00244367	2	Tsp3A; robo; trn; Traf4; CG15439; tup; RanGAP; grn; stumps; srp; pygo; ttk; EcR; par-1; Vhl; CG12343; Mef2; Pkn; pnt; Ada2b; seq; Glut4EF; jing; not; kon; smid; d; pros; pyd; CG43658
embryo	GO:0007162	0.00172523	38.7649	0.0627161	2	13	negative regulation of cell adhesion	0.00248367	2	pygo; par-1
embryo	GO:0031058	0.00172523	38.7649	0.0627161	2	13	positive regulation of histone modification	0.00248367	2	dik; Ada2b
embryo	GO:0044237	0.00182068	2.19866	22.4331	34	4650	cellular metabolic process	0.00260848	2	Es2; Ppa; CG11486; Brms1; dik; Traf4; Fip1; Fic; GATAd; YL-1; CG16865; tup; CG33116; grn; srp; trem; pygo; ttk; EcR; par-1; CG30100; Vhl; CG12343; Mef2; Pkn; pnt; Ada2b; seq; Ext2; MED21; jing; not; pros; pyd
embryo	GO:0006807	0.00183135	2.25629	15.24	26	3159	nitrogen compound metabolic process	0.0026112	2	Es2; CG11486; Brms1; dik; Fip1; GATAd; YL-1; CG16865; tup; grn; srp; trem; pygo; ttk; EcR; CG30100; CG12343; Mef2; pnt; Ada2b; seq; Ext2; MED21; jing; not; pros
embryo	GO:0048565	0.0019305	8.26887	0.530675	4	110	digestive tract development	0.00272649	2	srp; EcR; Mef2; pnt
embryo	GO:0055123	0.0019305	8.26887	0.530675	4	110	digestive system development	0.00272649	2	srp; EcR; Mef2; pnt
embryo	GO:0045892	0.00196779	4.35885	1.78982	7	371	negative regulation of transcription, DNA-templated	0.00274019	2	tup; ttk; EcR; ADD1; seq; jing; pros
embryo	GO:1902679	0.00196779	4.35885	1.78982	7	371	negative regulation of RNA biosynthetic process	0.00274019	2	tup; ttk; EcR; ADD1; seq; jing; pros
embryo	GO:1903507	0.00196779	4.35885	1.78982	7	371	negative regulation of nucleic acid-templated transcription	0.00274019	2	tup; ttk; EcR; ADD1; seq; jing; pros
embryo	GO:0032502	0.00202952	2.19077	18.8582	30	3909	developmental process	0.00281301	2	Tsp3A; robo; trn; Traf4; CG15439; tup; RanGAP; grn; stumps; srp; pygo; ttk; EcR; par-1; Vhl; CG12343; Mef2; Pkn; pnt; Ada2b; seq; Glut4EF; jing; not; kon; smid; d; pros; pyd; CG43658
embryo	GO:0048568	0.00210674	12.9758	0.255689	3	53	embryonic organ development	0.00287986	2	robo; srp; EcR
embryo	GO:0055001	0.00210674	12.9758	0.255689	3	53	muscle cell development	0.00287986	2	Mef2; pnt; kon
embryo	GO:0055002	0.00210674	12.9758	0.255689	3	53	striated muscle cell development	0.00287986	2	Mef2; pnt; kon
embryo	GO:0042692	0.0021301	8.03932	0.545148	4	113	muscle cell differentiation	0.00289278	2	tup; Mef2; pnt; kon
embryo	GO:0044271	0.00213561	2.41739	9.69687	19	2010	cellular nitrogen compound biosynthetic process	0.00289278	2	Brms1; dik; GATAd; YL-1; tup; grn; srp; pygo; ttk; EcR; CG30100; Mef2; pnt; Ada2b; seq; MED21; jing; not; pros
embryo	GO:0042461	0.00227082	7.89318	0.554796	4	115	photoreceptor cell development	0.00306201	2	ttk; EcR; pnt; seq
embryo	GO:0051253	0.00242524	4.19252	1.85736	7	385	negative regulation of RNA metabolic process	0.0032555	2	tup; ttk; EcR; ADD1; seq; jing; pros
embryo	GO:0007163	0.00244513	5.8311	0.940741	5	195	establishment or maintenance of cell polarity	0.00326748	2	par-1; Vhl; pnt; d; pyd
embryo	GO:0001964	0.00262962	30.4507	0.077189	2	16	startle response	0.00343696	2	robo; ttk
embryo	GO:0007412	0.00262962	30.4507	0.077189	2	16	axon target recognition	0.00343696	2	Ada2b; not
embryo	GO:0007428	0.00262962	30.4507	0.077189	2	16	primary branching, open tracheal system	0.00343696	2	stumps; pnt
embryo	GO:0035153	0.00262962	30.4507	0.077189	2	16	epithelial cell type specification, open tracheal system	0.00343696	2	seq; pyd
embryo	GO:0048854	0.00262962	30.4507	0.077189	2	16	brain morphogenesis	0.00343696	2	robo; ttk
embryo	GO:0031401	0.00265048	7.54988	0.578918	4	120	positive regulation of protein modification process	0.00344909	2	dik; Traf4; Fip1; Ada2b
embryo	GO:0046530	0.00272833	5.67925	0.964863	5	200	photoreceptor cell differentiation	0.00353497	2	ttk; EcR; pnt; seq; pros
embryo	GO:0009966	0.00280658	3.38082	3.00555	9	623	regulation of signal transduction	0.00362061	2	Tsp3A; Brms1; Traf4; Fip1; pygo; par-1; pnt; pyd; CG43658
embryo	GO:0045934	0.00326101	3.96491	1.95867	7	406	negative regulation of nucleobase-containing compound metabolic process	0.00418871	2	tup; ttk; EcR; ADD1; seq; jing; pros
embryo	GO:0044249	0.0034071	2.23727	11.6845	21	2422	cellular biosynthetic process	0.00435042	2	Brms1; dik; GATAd; YL-1; tup; CG33116; grn; srp; pygo; ttk; EcR; CG30100; Mef2; pnt; Ada2b; seq; Ext2; MED21; jing; not; pros
embryo	GO:0010629	0.0034161	3.55073	2.51829	8	522	negative regulation of gene expression	0.00435042	2	YL-1; tup; ttk; EcR; ADD1; seq; jing; pros
embryo	GO:0010605	0.00364857	3.24165	3.12616	9	648	negative regulation of macromolecule metabolic process	0.0046267	2	YL-1; tup; ttk; EcR; par-1; ADD1; seq; jing; pros
embryo	GO:1901576	0.00369731	2.2189	11.7617	21	2438	organic substance biosynthetic process	0.00466808	2	Brms1; dik; GATAd; YL-1; tup; CG33116; grn; srp; pygo; ttk; EcR; CG30100; Mef2; pnt; Ada2b; seq; Ext2; MED21; jing; not; pros
embryo	GO:0060911	0.00371254	25.071	0.091662	2	19	cardiac cell fate commitment	0.00466808	2	EcR; pnt
embryo	GO:0010558	0.00387944	3.83564	2.02139	7	419	negative regulation of macromolecule biosynthetic process	0.00483712	2	tup; ttk; EcR; ADD1; seq; jing; pros
embryo	GO:2000113	0.00387944	3.83564	2.02139	7	419	negative regulation of cellular macromolecule biosynthetic process	0.00483712	2	tup; ttk; EcR; ADD1; seq; jing; pros
embryo	GO:0010002	0.00411229	23.6762	0.0964863	2	20	cardioblast differentiation	0.00507097	2	EcR; pnt
embryo	GO:0043966	0.00411229	23.6762	0.0964863	2	20	histone H3 acetylation	0.00507097	2	dik; Ada2b
embryo	GO:0051128	0.00411804	3.17864	3.18405	9	660	regulation of cellular component organization	0.00507097	2	robo; dik; ttk; par-1; Vhl; Ada2b; kon; pros; pyd
embryo	GO:0007420	0.00415494	6.62608	0.656107	4	136	brain development	0.00509535	2	robo; ttk; EcR; pros
embryo	GO:0016573	0.00428228	9.96923	0.328053	3	68	histone acetylation	0.00522999	2	dik; YL-1; Ada2b
embryo	GO:0009890	0.00435744	3.75082	2.06481	7	428	negative regulation of biosynthetic process	0.00527853	2	tup; ttk; EcR; ADD1; seq; jing; pros
embryo	GO:0031327	0.00435744	3.75082	2.06481	7	428	negative regulation of cellular biosynthetic process	0.00527853	2	tup; ttk; EcR; ADD1; seq; jing; pros
embryo	GO:0031987	0.00453111	22.4283	0.101311	2	21	locomotion involved in locomotory behavior	0.00542278	2	robo; ttk
embryo	GO:0042675	0.00453111	22.4283	0.101311	2	21	compound eye cone cell differentiation	0.00542278	2	ttk; pros
embryo	GO:0050905	0.00453111	22.4283	0.101311	2	21	neuromuscular process	0.00542278	2	robo; ttk
embryo	GO:0006475	0.00464564	9.67007	0.337702	3	70	internal protein amino acid acetylation	0.00549365	2	dik; YL-1; Ada2b
embryo	GO:0018393	0.00464564	9.67007	0.337702	3	70	internal peptidyl-lysine acetylation	0.00549365	2	dik; YL-1; Ada2b
embryo	GO:0018394	0.00464564	9.67007	0.337702	3	70	peptidyl-lysine acetylation	0.00549365	2	dik; YL-1; Ada2b
embryo	GO:0006473	0.00483411	9.52709	0.342526	3	71	protein acetylation	0.00569393	2	dik; YL-1; Ada2b
embryo	GO:0009058	0.00493251	2.15428	12.0415	21	2496	biosynthetic process	0.00578696	2	Brms1; dik; GATAd; YL-1; tup; CG33116; grn; srp; pygo; ttk; EcR; CG30100; Mef2; pnt; Ada2b; seq; Ext2; MED21; jing; not; pros
embryo	GO:0048523	0.00521787	2.62036	5.2585	12	1090	negative regulation of cellular process	0.00608602	2	tup; srp; pygo; ttk; EcR; par-1; ADD1; Vhl; pnt; seq; jing; pros
embryo	GO:0048519	0.00524532	2.5249	5.95803	13	1235	negative regulation of biological process	0.00608602	2	YL-1; tup; srp; pygo; ttk; EcR; par-1; ADD1; Vhl; pnt; seq; jing; pros
embryo	GO:0009892	0.00524868	3.05456	3.30466	9	685	negative regulation of metabolic process	0.00608602	2	YL-1; tup; ttk; EcR; par-1; ADD1; seq; jing; pros
embryo	GO:0060284	0.00532173	4.82255	1.12889	5	234	regulation of cell development	0.00614607	2	robo; EcR; par-1; pnt; pros
embryo	GO:1902533	0.00534172	6.15443	0.70435	4	146	positive regulation of intracellular signal transduction	0.00614607	2	Traf4; Fip1; par-1; CG43658
embryo	GO:0044238	0.00570015	1.99274	23.8225	34	4938	primary metabolic process	0.00653325	2	Es2; Ppa; CG11486; Brms1; dik; Traf4; Fip1; Fic; GATAd; YL-1; CG16865; tup; CG33116; grn; srp; trem; pygo; ttk; EcR; par-1; CG30100; Vhl; CG12343; Mef2; Pkn; pnt; Ada2b; seq; Ext2; MED21; jing; not; pros; pyd
embryo	GO:0051172	0.00578278	3.54968	2.17577	7	451	negative regulation of nitrogen compound metabolic process	0.00658893	2	tup; ttk; EcR; ADD1; seq; jing; pros
embryo	GO:0007423	0.00579295	3.23433	2.74986	8	570	sensory organ development	0.00658893	2	Traf4; tup; ttk; pnt; seq; d; pros; pyd
embryo	GO:0031056	0.00590016	19.3652	0.115784	2	24	regulation of histone modification	0.00668535	2	dik; Ada2b
embryo	GO:0001654	0.00599184	3.52497	2.19024	7	454	eye development	0.00676351	2	Traf4; ttk; pnt; seq; d; pros; pyd
embryo	GO:0016569	0.00629569	5.86194	0.73812	4	153	covalent chromatin modification	0.00703715	2	dik; YL-1; Ada2b; not
embryo	GO:0016570	0.00629569	5.86194	0.73812	4	153	histone modification	0.00703715	2	dik; YL-1; Ada2b; not
embryo	GO:0044700	0.0063051	2.27454	8.30747	16	1722	single organism signaling	0.00703715	2	Tsp3A; robo; Brms1; Traf4; CG15439; Fip1; tup; stumps; pygo; EcR; par-1; Pkn; pnt; Ext2; pyd; CG43658
embryo	GO:0001745	0.00636756	3.9218	1.67404	6	347	compound eye morphogenesis	0.00706389	2	ttk; pnt; seq; d; pros; pyd
embryo	GO:0023052	0.00637646	2.27145	8.31712	16	1724	signaling	0.00706389	2	Tsp3A; robo; Brms1; Traf4; CG15439; Fip1; tup; stumps; pygo; EcR; par-1; Pkn; pnt; Ext2; pyd; CG43658
embryo	GO:0006897	0.00645532	3.91001	1.67886	6	348	endocytosis	0.00712476	2	Tsp3A; Traf4; srp; EcR; pnt; pros
embryo	GO:0042221	0.00657517	2.64291	4.72783	11	980	response to chemical	0.00722091	2	robo; trn; tup; grn; stumps; EcR; Vhl; seq; jing; not; pros
embryo	GO:0023051	0.0066089	2.93933	3.42526	9	710	regulation of signaling	0.00722091	2	Tsp3A; Brms1; Traf4; Fip1; pygo; par-1; pnt; pyd; CG43658
embryo	GO:0031324	0.00661513	3.15773	2.81258	8	583	negative regulation of cellular metabolic process	0.00722091	2	tup; ttk; EcR; par-1; ADD1; seq; jing; pros
embryo	GO:0007417	0.00689173	4.52049	1.20125	5	249	central nervous system development	0.00748233	2	robo; ttk; EcR; jing; pros
embryo	GO:0007362	0.00690484	17.7486	0.125432	2	26	terminal region determination	0.00748233	2	tup; pnt
embryo	GO:0048863	0.00697502	8.29892	0.390769	3	81	stem cell differentiation	0.007531	2	EcR; pnt; pros
embryo	GO:0007389	0.00723459	3.10669	2.85599	8	592	pattern specification process	0.00778306	2	robo; tup; pygo; EcR; par-1; pnt; Ada2b; jing
embryo	GO:0000122	0.007357	5.5957	0.77189	4	160	negative regulation of transcription from RNA polymerase II promoter	0.00788628	2	ttk; seq; jing; pros
embryo	GO:0010646	0.00741664	2.8826	3.48798	9	723	regulation of cell communication	0.00792172	2	Tsp3A; Brms1; Traf4; Fip1; pygo; par-1; pnt; pyd; CG43658
embryo	GO:0048732	0.00784591	5.48877	0.786363	4	163	gland development	0.00834546	2	robo; trn; tup; srp
embryo	GO:0061061	0.00797613	4.35645	1.24467	5	258	muscle structure development	0.00834546	2	tup; EcR; Mef2; pnt; kon
embryo	GO:0001707	0.0079814	16.3806	0.135081	2	28	mesoderm formation	0.00834546	2	stumps; srp
embryo	GO:0007406	0.0079814	16.3806	0.135081	2	28	negative regulation of neuroblast proliferation	0.00834546	2	EcR; pros
embryo	GO:0045610	0.0079814	16.3806	0.135081	2	28	regulation of hemocyte differentiation	0.00834546	2	srp; pnt
embryo	GO:2000178	0.0079814	16.3806	0.135081	2	28	negative regulation of neural precursor cell proliferation	0.00834546	2	EcR; pros
embryo	GO:0009880	0.00836263	4.30433	1.25915	5	261	embryonic pattern specification	0.00869424	2	tup; pygo; par-1; pnt; jing
embryo	GO:0048592	0.00840248	3.68785	1.77535	6	368	eye morphogenesis	0.00869424	2	ttk; pnt; seq; d; pros; pyd
embryo	GO:0090596	0.00840248	3.68785	1.77535	6	368	sensory organ morphogenesis	0.00869424	2	ttk; pnt; seq; d; pros; pyd
embryo	GO:0045995	0.00849048	7.70238	0.419715	3	87	regulation of embryonic development	0.00875489	2	ttk; par-1; pyd
embryo	GO:0022604	0.00870757	5.31925	0.810485	4	168	regulation of cell morphogenesis	0.00894778	2	ttk; par-1; pros; pyd
embryo	GO:0001751	0.00906892	5.2543	0.820133	4	170	compound eye photoreceptor cell differentiation	0.00928419	2	ttk; pnt; seq; pros
embryo	GO:0035051	0.00912841	15.2081	0.144729	2	30	cardiocyte differentiation	0.00928419	2	EcR; pnt
embryo	GO:0048332	0.00912841	15.2081	0.144729	2	30	mesoderm morphogenesis	0.00928419	2	stumps; srp
embryo	GO:0007369	0.00931518	7.43497	0.434188	3	90	gastrulation	0.00944191	2	Traf4; stumps; srp
embryo	GO:0050767	0.00943995	5.1909	0.829782	4	172	regulation of neurogenesis	0.00953595	2	robo; EcR; pnt; pros
embryo	GO:0048477	0.00957108	2.75925	3.63271	9	753	oogenesis	0.00963575	2	Tsp3A; stumps; ttk; EcR; par-1; Mef2; pnt; jing; kon
embryo	GO:0008347	0.0097279	14.6825	0.149554	2	31	glial cell migration	0.0097279	2	jing; not
embryo	GO:2000647	0.0097279	14.6825	0.149554	2	31	negative regulation of stem cell proliferation	0.0097279	2	EcR; pros
embryo	GO:0007049	1.47205e-10	10.201	3.06995	18	979	cell cycle	2.81162e-08	3	dgt4; APC7; msd5; dah; Axs; spd-2; CycA; hd; Skp2; CycE; grp; CG10336; lok; Rad17; gwl; geminin; mars; wac
embryo	GO:0007346	1.08449e-09	19.8211	0.696149	10	222	regulation of mitotic cell cycle	8.07154e-08	3	dgt4; APC7; CycA; CycE; grp; CG10336; lok; gwl; geminin; mars
embryo	GO:0022402	1.26778e-09	9.84799	2.61526	16	834	cell cycle process	8.07154e-08	3	dgt4; APC7; msd5; dah; Axs; spd-2; CycA; hd; CycE; grp; CG10336; lok; gwl; geminin; mars; wac
embryo	GO:0000278	2.88966e-09	10.7292	1.97242	14	629	mitotic cell cycle	1.37981e-07	3	dgt4; APC7; msd5; spd-2; CycA; Skp2; CycE; grp; CG10336; lok; gwl; geminin; mars; wac
embryo	GO:0051726	6.98317e-09	13.8073	1.11007	11	354	regulation of cell cycle	2.66757e-07	3	dgt4; APC7; CycA; Skp2; CycE; grp; CG10336; lok; gwl; geminin; mars
embryo	GO:1903047	6.24243e-08	9.83582	1.71842	12	548	mitotic cell cycle process	1.98717e-06	3	dgt4; APC7; msd5; spd-2; CycA; CycE; grp; CG10336; lok; gwl; mars; wac
embryo	GO:0000280	2.19857e-06	8.39786	1.56477	10	499	nuclear division	5.18948e-05	3	dgt4; APC7; msd5; Axs; spd-2; CycA; CycE; grp; gwl; wac
embryo	GO:0007088	2.25671e-06	28.341	0.216371	5	69	regulation of mitotic nuclear division	5.18948e-05	3	dgt4; APC7; CycA; CycE; gwl
embryo	GO:0048285	2.81918e-06	8.15452	1.60867	10	513	organelle fission	5.18948e-05	3	dgt4; APC7; msd5; Axs; spd-2; CycA; CycE; grp; gwl; wac
embryo	GO:0010564	2.8401e-06	13.5481	0.639704	7	204	regulation of cell cycle process	5.18948e-05	3	dgt4; APC7; CycA; CycE; grp; gwl; mars
embryo	GO:0051783	2.9887e-06	26.6652	0.228914	5	73	regulation of nuclear division	5.18948e-05	3	dgt4; APC7; CycA; CycE; gwl
embryo	GO:0044265	5.52588e-06	9.96393	1.00659	8	321	cellular macromolecule catabolic process	8.18522e-05	3	APC7; CG6758; CycA; smg; CG5199; Skp2; CycE; AGO3
embryo	GO:0000226	5.57109e-06	8.51374	1.35153	9	431	microtubule cytoskeleton organization	8.18522e-05	3	dgt4; msd5; Axs; spd-2; grp; gwl; mars; mael; wac
embryo	GO:0043161	7.89967e-06	14.9469	0.48605	6	155	proteasome-mediated ubiquitin-dependent protein catabolic process	0.000107774	3	APC7; CG6758; CycA; CG5199; Skp2; CycE
embryo	GO:0051302	9.36993e-06	20.8097	0.288494	5	92	regulation of cell division	0.000113145	3	dgt4; APC7; CycA; CycE; gwl
embryo	GO:0010498	9.4781e-06	14.4557	0.501729	6	160	proteasomal protein catabolic process	0.000113145	3	APC7; CG6758; CycA; CG5199; Skp2; CycE
embryo	GO:0009794	1.26385e-05	86.0139	0.0470371	3	15	regulation of mitotic cell cycle, embryonic	0.000141018	3	CycA; grp; geminin
embryo	GO:0007051	1.32897e-05	10.5863	0.809038	7	258	spindle organization	0.000141018	3	dgt4; msd5; Axs; spd-2; grp; mars; wac
embryo	GO:0009057	1.47073e-05	8.65415	1.15084	8	367	macromolecule catabolic process	0.000143734	3	APC7; CG6758; CycA; smg; CG5199; Skp2; CycE; AGO3
embryo	GO:0007067	1.54275e-05	10.334	0.827852	7	264	mitotic nuclear division	0.000143734	3	dgt4; APC7; msd5; spd-2; CycA; CycE; gwl
embryo	GO:0051052	1.58032e-05	31.3727	0.153654	4	49	regulation of DNA metabolic process	0.000143734	3	CycE; CG10336; lok; geminin
embryo	GO:0010529	1.88064e-05	73.7143	0.0533087	3	17	negative regulation of transposition	0.000156953	3	BoYb; mael; AGO3
embryo	GO:0022607	1.89001e-05	5.4869	2.95079	12	941	cellular component assembly	0.000156953	3	msd5; dah; spd-2; hd; CycE; grp; BigH1; geminin; mars; mael; Chrac-14; wac
embryo	GO:0010528	2.25188e-05	68.7944	0.0564445	3	18	regulation of transposition	0.000179212	3	BoYb; mael; AGO3
embryo	GO:0006259	2.36194e-05	9.6433	0.884297	7	282	DNA metabolic process	0.000180452	3	hd; CycE; CG10336; lok; Rad17; geminin; cerv
embryo	GO:0032196	2.66831e-05	64.4896	0.0595803	3	19	transposition	0.000191468	3	BoYb; mael; AGO3
embryo	GO:1902589	2.70661e-05	4.71976	4.16748	14	1329	single-organism organelle organization	0.000191468	3	dgt4; APC7; msd5; dah; Axs; spd-2; CycA; CycE; grp; gwl; mars; mael; Chrac-14; wac
embryo	GO:0006974	3.08627e-05	9.23095	0.921927	7	294	cellular response to DNA damage stimulus	0.000209483	3	CycE; grp; CG10336; lok; Rad17; cerv; Chrac-14
embryo	GO:0007010	3.18064e-05	6.07435	2.1198	10	676	cytoskeleton organization	0.000209483	3	dgt4; msd5; dah; Axs; spd-2; grp; gwl; mars; mael; wac
embryo	GO:0007017	3.38232e-05	6.70452	1.69333	9	540	microtubule-based process	0.000215341	3	dgt4; msd5; Axs; spd-2; grp; gwl; mars; mael; wac
embryo	GO:0006275	3.64651e-05	57.3148	0.0658519	3	21	regulation of DNA replication	0.000217651	3	CycE; CG10336; geminin
embryo	GO:0007307	3.64651e-05	57.3148	0.0658519	3	21	eggshell chorion gene amplification	0.000217651	3	hd; CycE; geminin
embryo	GO:0044085	4.39154e-05	5.00044	3.21106	12	1024	cellular component biogenesis	0.000254177	3	msd5; dah; spd-2; hd; CycE; grp; BigH1; geminin; mars; mael; Chrac-14; wac
embryo	GO:0051301	4.79189e-05	8.58665	0.987778	7	315	cell division	0.00026383	3	dgt4; APC7; dah; CycA; CycE; gwl; wac
embryo	GO:0006277	4.83459e-05	51.575	0.0721235	3	23	DNA amplification	0.00026383	3	hd; CycE; geminin
embryo	GO:0031329	5.18751e-05	14.3231	0.41079	5	131	regulation of cellular catabolic process	0.000275226	3	APC7; CycA; smg; CycE; AGO3
embryo	GO:0035186	6.25149e-05	46.8788	0.0783951	3	25	syncytial blastoderm mitotic cell cycle	0.000322712	3	CycA; grp; geminin
embryo	GO:0048523	8.09935e-05	4.66708	3.41803	12	1090	negative regulation of cellular process	0.000407099	3	CycA; smg; BoYb; CycE; grp; CG10336; lok; gwl; geminin; mars; mael; AGO3
embryo	GO:0006461	8.6659e-05	7.78143	1.08499	7	346	protein complex assembly	0.000424407	3	msd5; spd-2; grp; BigH1; mars; Chrac-14; wac
embryo	GO:0070271	9.14783e-05	7.71126	1.0944	7	349	protein complex biogenesis	0.000431724	3	msd5; spd-2; grp; BigH1; mars; Chrac-14; wac
embryo	GO:0009894	9.26737e-05	12.6028	0.464099	5	148	regulation of catabolic process	0.000431724	3	APC7; CycA; smg; CycE; AGO3
embryo	GO:0033301	9.8459e-05	39.6538	0.0909383	3	29	cell cycle comprising mitosis without cytokinesis	0.000447754	3	CycA; grp; geminin
embryo	GO:0006511	0.000118769	9.01892	0.787087	6	251	ubiquitin-dependent protein catabolic process	0.000513869	3	APC7; CG6758; CycA; CG5199; Skp2; CycE
embryo	GO:0019941	0.000126763	8.90762	0.796494	6	254	modification-dependent protein catabolic process	0.000513869	3	APC7; CG6758; CycA; CG5199; Skp2; CycE
embryo	GO:0043632	0.000129521	8.87112	0.79963	6	255	modification-dependent macromolecule catabolic process	0.000513869	3	APC7; CG6758; CycA; CG5199; Skp2; CycE
embryo	GO:0051225	0.000133015	17.5971	0.263408	4	84	spindle assembly	0.000513869	3	msd5; spd-2; grp; wac
embryo	GO:0044257	0.000135179	8.79899	0.805902	6	257	cellular protein catabolic process	0.000513869	3	APC7; CG6758; CycA; CG5199; Skp2; CycE
embryo	GO:0051603	0.000135179	8.79899	0.805902	6	257	proteolysis involved in cellular protein catabolic process	0.000513869	3	APC7; CG6758; CycA; CG5199; Skp2; CycE
embryo	GO:0007143	0.00013927	17.3785	0.266543	4	85	female meiotic division	0.000513869	3	Axs; grp; gwl; wac
embryo	GO:0031442	0.000142592	167.486	0.0188148	2	6	positive regulation of mRNA 3'-end processing	0.000513869	3	smg; AGO3
embryo	GO:0050685	0.000142592	167.486	0.0188148	2	6	positive regulation of mRNA processing	0.000513869	3	smg; AGO3
embryo	GO:0060211	0.000142592	167.486	0.0188148	2	6	regulation of nuclear-transcribed mRNA poly(A) tail shortening	0.000513869	3	smg; AGO3
embryo	GO:0060213	0.000142592	167.486	0.0188148	2	6	positive regulation of nuclear-transcribed mRNA poly(A) tail shortening	0.000513869	3	smg; AGO3
embryo	GO:0071897	0.000145745	34.3556	0.103482	3	33	DNA biosynthetic process	0.000515505	3	hd; CycE; geminin
embryo	GO:0045995	0.000152416	16.957	0.272815	4	87	regulation of embryonic development	0.000529298	3	CycA; grp; geminin; mael
embryo	GO:0071822	0.000164878	5.38716	2.07904	9	663	protein complex subunit organization	0.000562352	3	dgt4; msd5; Axs; spd-2; grp; BigH1; mars; Chrac-14; wac
embryo	GO:0030163	0.000184174	8.29255	0.852939	6	272	protein catabolic process	0.000617146	3	APC7; CG6758; CycA; CG5199; Skp2; CycE
embryo	GO:0007306	0.000197246	15.8061	0.29163	4	93	eggshell chorion assembly	0.000623828	3	hd; CycE; geminin; mael
embryo	GO:0034508	0.000199233	133.978	0.0219506	2	7	centromere complex assembly	0.000623828	3	mars; Chrac-14
embryo	GO:1900151	0.000199233	133.978	0.0219506	2	7	regulation of nuclear-transcribed mRNA catabolic process, deadenylation-dependent decay	0.000623828	3	smg; AGO3
embryo	GO:1900153	0.000199233	133.978	0.0219506	2	7	positive regulation of nuclear-transcribed mRNA catabolic process, deadenylation-dependent decay	0.000623828	3	smg; AGO3
embryo	GO:0006260	0.000214103	15.4562	0.297901	4	95	DNA replication	0.000659576	3	hd; CycE; CG10336; geminin
embryo	GO:0007059	0.000220323	10.3919	0.558173	5	178	chromosome segregation	0.000667963	3	APC7; Axs; CycA; grp; mars
embryo	GO:0006996	0.000233858	3.64664	5.73539	15	1829	organelle organization	0.000697921	3	dgt4; APC7; msd5; dah; Axs; spd-2; CycA; CycE; grp; BigH1; gwl; mars; mael; Chrac-14; wac
embryo	GO:0031145	0.000259947	27.8401	0.125432	3	40	anaphase-promoting complex-dependent proteasomal ubiquitin-dependent protein catabolic process	0.000727213	3	APC7; CycA; CycE
embryo	GO:0007348	0.000265117	111.64	0.0250864	2	8	regulation of syncytial blastoderm mitotic cell cycle	0.000727213	3	grp; geminin
embryo	GO:0061013	0.000265117	111.64	0.0250864	2	8	regulation of mRNA catabolic process	0.000727213	3	smg; AGO3
embryo	GO:0061014	0.000265117	111.64	0.0250864	2	8	positive regulation of mRNA catabolic process	0.000727213	3	smg; AGO3
embryo	GO:1903313	0.000265117	111.64	0.0250864	2	8	positive regulation of mRNA metabolic process	0.000727213	3	smg; AGO3
embryo	GO:0048519	0.000267126	4.06105	3.87272	12	1235	negative regulation of biological process	0.000727213	3	CycA; smg; BoYb; CycE; grp; CG10336; lok; gwl; geminin; mars; mael; AGO3
embryo	GO:0033043	0.000270325	7.69994	0.915655	6	292	regulation of organelle organization	0.000727213	3	dgt4; APC7; CycA; CycE; gwl; mars
embryo	GO:0032434	0.000279862	27.1053	0.128568	3	41	regulation of proteasomal ubiquitin-dependent protein catabolic process	0.000742413	3	APC7; CycA; CycE
embryo	GO:1901575	0.000293885	5.51718	1.76232	8	562	organic substance catabolic process	0.000766651	3	APC7; CG6758; CycA; smg; CG5199; Skp2; CycE; AGO3
embryo	GO:0065003	0.000300051	6.30063	1.32645	7	423	macromolecular complex assembly	0.000766651	3	msd5; spd-2; grp; BigH1; mars; Chrac-14; wac
embryo	GO:0044248	0.000301041	5.4964	1.76859	8	564	cellular catabolic process	0.000766651	3	APC7; CG6758; CycA; smg; CG5199; Skp2; CycE; AGO3
embryo	GO:0061136	0.000322593	25.7458	0.13484	3	43	regulation of proteasomal protein catabolic process	0.000810728	3	APC7; CycA; CycE
embryo	GO:0044260	0.000356506	3.14173	11.4112	22	3639	cellular macromolecule metabolic process	0.000884321	3	APC7; CG6758; shu; CycA; smg; akirin; CG5199; hd; Skp2; CycE; grp; CG10336; lok; BigH1; Rad17; gwl; geminin; lola; mael; cerv; Chrac-14; AGO3
embryo	GO:0080090	0.000370171	3.72851	4.63785	13	1479	regulation of primary metabolic process	0.000906445	3	APC7; CycA; smg; akirin; CycE; CG10336; lok; BigH1; gwl; geminin; lola; mael; AGO3
embryo	GO:0033554	0.000389665	5.27737	1.83758	8	586	cellular response to stress	0.000941234	3	CG5199; CycE; grp; CG10336; lok; Rad17; cerv; Chrac-14
embryo	GO:0045448	0.000394234	23.9438	0.144247	3	46	mitotic cell cycle, embryonic	0.000941234	3	CycA; grp; geminin
embryo	GO:1903050	0.000420203	23.3977	0.147383	3	47	regulation of proteolysis involved in cellular protein catabolic process	0.000964993	3	APC7; CycA; CycE
embryo	GO:1903362	0.000420203	23.3977	0.147383	3	47	regulation of cellular protein catabolic process	0.000964993	3	APC7; CycA; CycE
embryo	GO:0000076	0.000424395	83.7162	0.031358	2	10	DNA replication checkpoint	0.000964993	3	grp; CG10336
embryo	GO:0008156	0.000424395	83.7162	0.031358	2	10	negative regulation of DNA replication	0.000964993	3	CG10336; geminin
embryo	GO:0045930	0.000444506	12.6507	0.360618	4	115	negative regulation of mitotic cell cycle	0.00099883	3	CycA; grp; CG10336; lok
embryo	GO:0045787	0.000475384	22.3768	0.153654	3	49	positive regulation of cell cycle	0.00105579	3	APC7; Skp2; CycE
embryo	GO:0090304	0.000481459	3.48361	5.42808	14	1731	nucleic acid metabolic process	0.001057	3	shu; smg; akirin; hd; CycE; CG10336; lok; BigH1; Rad17; geminin; lola; mael; cerv; AGO3
embryo	GO:0031323	0.000497108	3.60258	4.77897	13	1524	regulation of cellular metabolic process	0.00107895	3	APC7; CycA; smg; akirin; CycE; CG10336; lok; BigH1; gwl; geminin; lola; mael; AGO3
embryo	GO:0007113	0.000517678	74.4084	0.0344938	2	11	endomitotic cell cycle	0.00111097	3	Skp2; geminin
embryo	GO:0060255	0.000543549	3.56492	4.82287	13	1538	regulation of macromolecule metabolic process	0.00115353	3	APC7; CycA; smg; akirin; CycE; CG10336; lok; BigH1; gwl; geminin; lola; mael; AGO3
embryo	GO:0030162	0.000555932	11.8935	0.382568	4	122	regulation of proteolysis	0.00116685	3	APC7; CycA; CycE; lok
embryo	GO:0007052	0.000595853	8.29385	0.693013	5	221	mitotic spindle organization	0.00123704	3	dgt4; msd5; spd-2; mars; wac
embryo	GO:0031331	0.000633112	20.1748	0.169333	3	54	positive regulation of cellular catabolic process	0.00130026	3	APC7; smg; AGO3
embryo	GO:0007096	0.000731256	60.8698	0.0407655	2	13	regulation of exit from mitosis	0.00148585	3	CycA; CycE
embryo	GO:0010605	0.000760101	4.74113	2.032	8	648	negative regulation of macromolecule metabolic process	0.0015282	3	CycA; smg; CycE; CG10336; gwl; geminin; mael; AGO3
embryo	GO:0000003	0.000791979	3.40858	5.01415	13	1599	reproduction	0.00154872	3	shu; Axs; spd-2; zpg; hd; CycE; grp; lok; gwl; geminin; lola; mael; wac
embryo	GO:0006139	0.000793655	3.19588	6.40645	15	2043	nucleobase-containing compound metabolic process	0.00154872	3	shu; smg; akirin; hd; CycE; CG10336; lok; BigH1; Rad17; dnk; geminin; lola; mael; cerv; AGO3
embryo	GO:0016043	0.000794632	3.00857	8.67677	18	2767	cellular component organization	0.00154872	3	dgt4; APC7; msd5; dah; Axs; spd-2; CycA; hd; CycE; grp; BigH1; gwl; geminin; mars; lola; mael; Chrac-14; wac
embryo	GO:0031023	0.000813454	10.7019	0.423334	4	135	microtubule organizing center organization	0.00156939	3	spd-2; grp; gwl; mael
embryo	GO:0000289	0.000851444	55.7928	0.0439013	2	14	nuclear-transcribed mRNA poly(A) tail shortening	0.00162626	3	smg; AGO3
embryo	GO:0045786	0.000883112	10.4597	0.432741	4	138	negative regulation of cell cycle	0.00167004	3	CycA; grp; CG10336; lok
embryo	GO:0042176	0.000948773	17.428	0.19442	3	62	regulation of protein catabolic process	0.00177662	3	APC7; CycA; CycE
embryo	GO:0010458	0.000980491	51.4969	0.0470371	2	15	exit from mitosis	0.00180424	3	CycA; CycE
embryo	GO:0007304	0.000982413	10.1532	0.445284	4	142	chorion-containing eggshell formation	0.00180424	3	hd; CycE; geminin; mael
embryo	GO:1901987	0.00100842	10.0793	0.44842	4	143	regulation of cell cycle phase transition	0.00181705	3	APC7; CycA; CycE; grp
embryo	GO:1901990	0.00100842	10.0793	0.44842	4	143	regulation of mitotic cell cycle phase transition	0.00181705	3	APC7; CycA; CycE; grp
embryo	GO:0030703	0.0010349	10.0065	0.451556	4	144	eggshell formation	0.00184049	3	hd; CycE; geminin; mael
embryo	GO:0009896	0.00104069	16.8538	0.200691	3	64	positive regulation of catabolic process	0.00184049	3	APC7; smg; AGO3
embryo	GO:0071840	0.00106677	2.91794	8.88373	18	2833	cellular component organization or biogenesis	0.00186929	3	dgt4; APC7; msd5; dah; Axs; spd-2; CycA; hd; CycE; grp; BigH1; gwl; geminin; mars; lola; mael; Chrac-14; wac
embryo	GO:0009892	0.00109196	4.46791	2.14803	8	685	negative regulation of metabolic process	0.00189604	3	CycA; smg; CycE; CG10336; gwl; geminin; mael; AGO3
embryo	GO:0044763	0.00111164	2.96118	18.0591	28	5759	single-organism cellular process	0.00190717	3	dgt4; APC7; shu; msd5; dah; Axs; spd-2; CycA; zpg; CG5199; BoYb; hd; Skp2; CycE; grp; CG10336; lok; Rad17; gwl; dnk; geminin; mars; lola; mael; cerv; Chrac-14; wac; AGO3
embryo	GO:0031440	0.00111834	47.8147	0.0501729	2	16	regulation of mRNA 3'-end processing	0.00190717	3	smg; AGO3
embryo	GO:0070925	0.00113463	7.14588	0.79963	5	255	organelle assembly	0.00191783	3	msd5; spd-2; grp; mars; wac
embryo	GO:0009056	0.00115537	4.42639	2.16684	8	691	catabolic process	0.00193576	3	APC7; CG6758; CycA; smg; CG5199; Skp2; CycE; AGO3
embryo	GO:0046483	0.00126367	3.0318	6.69181	15	2134	heterocycle metabolic process	0.00209878	3	shu; smg; akirin; hd; CycE; CG10336; lok; BigH1; Rad17; dnk; geminin; lola; mael; cerv; AGO3
embryo	GO:0019219	0.00141856	3.65814	3.3804	10	1078	regulation of nucleobase-containing compound metabolic process	0.00230703	3	smg; akirin; CycE; CG10336; lok; BigH1; geminin; lola; mael; AGO3
embryo	GO:0000288	0.00142025	41.8311	0.0564445	2	18	nuclear-transcribed mRNA catabolic process, deadenylation-dependent decay	0.00230703	3	smg; AGO3
embryo	GO:0098813	0.00142528	9.14659	0.492321	4	157	nuclear chromosome segregation	0.00230703	3	APC7; Axs; CycA; grp
embryo	GO:0044772	0.00149333	9.0271	0.498593	4	159	mitotic cell cycle phase transition	0.00239685	3	APC7; CycA; CycE; grp
embryo	GO:0006725	0.00150678	2.97071	6.8047	15	2170	cellular aromatic compound metabolic process	0.00239829	3	shu; smg; akirin; hd; CycE; CG10336; lok; BigH1; Rad17; dnk; geminin; lola; mael; cerv; AGO3
embryo	GO:0032269	0.00156361	8.91065	0.504865	4	161	negative regulation of cellular protein metabolic process	0.00244794	3	CycA; smg; CycE; gwl
embryo	GO:0051248	0.00156361	8.91065	0.504865	4	161	negative regulation of protein metabolic process	0.00244794	3	CycA; smg; CycE; gwl
embryo	GO:0044770	0.00163617	8.79712	0.511136	4	163	cell cycle phase transition	0.00254072	3	APC7; CycA; CycE; grp
embryo	GO:0019222	0.001721	3.09779	5.44376	13	1736	regulation of metabolic process	0.00264203	3	APC7; CycA; smg; akirin; CycE; CG10336; lok; BigH1; gwl; geminin; lola; mael; AGO3
embryo	GO:0032435	0.00175674	37.1772	0.0627161	2	20	negative regulation of proteasomal ubiquitin-dependent protein catabolic process	0.00264203	3	CycA; CycE
embryo	GO:0044719	0.00175674	37.1772	0.0627161	2	20	regulation of imaginal disc-derived wing size	0.00264203	3	CycE; lola
embryo	GO:1901799	0.00175674	37.1772	0.0627161	2	20	negative regulation of proteasomal protein catabolic process	0.00264203	3	CycA; CycE
embryo	GO:0044773	0.00184361	13.6922	0.244593	3	78	mitotic DNA damage checkpoint	0.00274166	3	grp; CG10336; lok
embryo	GO:0044774	0.00191225	13.511	0.247729	3	79	mitotic DNA integrity checkpoint	0.00274166	3	grp; CG10336; lok
embryo	GO:0042177	0.00193782	35.2176	0.0658519	2	21	negative regulation of protein catabolic process	0.00274166	3	CycA; CycE
embryo	GO:0051299	0.00193782	35.2176	0.0658519	2	21	centrosome separation	0.00274166	3	grp; gwl
embryo	GO:1901989	0.00193782	35.2176	0.0658519	2	21	positive regulation of cell cycle phase transition	0.00274166	3	APC7; CycE
embryo	GO:1901992	0.00193782	35.2176	0.0658519	2	21	positive regulation of mitotic cell cycle phase transition	0.00274166	3	APC7; CycE
embryo	GO:1903051	0.00193782	35.2176	0.0658519	2	21	negative regulation of proteolysis involved in cellular protein catabolic process	0.00274166	3	CycA; CycE
embryo	GO:1903363	0.00193782	35.2176	0.0658519	2	21	negative regulation of cellular protein catabolic process	0.00274166	3	CycA; CycE
embryo	GO:0031324	0.00199246	4.48969	1.82817	7	583	negative regulation of cellular metabolic process	0.00279823	3	CycA; smg; CycE; CG10336; gwl; geminin; mael
embryo	GO:0032268	0.00209143	5.10969	1.35467	6	432	regulation of cellular protein metabolic process	0.00291579	3	APC7; CycA; smg; CycE; lok; gwl
embryo	GO:1901360	0.00212458	2.85289	7.03361	15	2243	organic cyclic compound metabolic process	0.00294055	3	shu; smg; akirin; hd; CycE; CG10336; lok; BigH1; Rad17; dnk; geminin; lola; mael; cerv; AGO3
embryo	GO:0050794	0.00231494	2.68396	9.46699	18	3019	regulation of cellular process	0.00317251	3	dgt4; APC7; CycA; smg; akirin; BoYb; Skp2; CycE; grp; CG10336; lok; BigH1; gwl; geminin; mars; lola; mael; AGO3
embryo	GO:0051053	0.0023254	31.8584	0.0721235	2	23	negative regulation of DNA metabolic process	0.00317251	3	CG10336; geminin
embryo	GO:0000077	0.00243761	12.3645	0.269679	3	86	DNA damage checkpoint	0.00330201	3	grp; CG10336; lok
embryo	GO:0031122	0.00253179	30.4079	0.0752593	2	24	cytoplasmic microtubule organization	0.00340543	3	spd-2; wac
embryo	GO:0031570	0.00268749	11.9302	0.279087	3	89	DNA integrity checkpoint	0.00358959	3	grp; CG10336; lok
embryo	GO:0051246	0.00277309	4.81637	1.43306	6	457	regulation of protein metabolic process	0.0036782	3	APC7; CycA; smg; CycE; lok; gwl
embryo	GO:0051171	0.00286536	3.29672	3.71279	10	1184	regulation of nitrogen compound metabolic process	0.00377437	3	smg; akirin; CycE; CG10336; lok; BigH1; geminin; lola; mael; AGO3
embryo	GO:0065004	0.00295268	11.5253	0.288494	3	92	protein-DNA complex assembly	0.00386275	3	BigH1; mars; Chrac-14
embryo	GO:0048522	0.00304125	3.47604	3.11699	9	994	positive regulation of cellular process	0.00395156	3	APC7; smg; akirin; Skp2; CycE; CG10336; lok; lola; AGO3
embryo	GO:0007093	0.00323346	11.1467	0.297901	3	95	mitotic cell cycle checkpoint	0.00417292	3	grp; CG10336; lok
embryo	GO:0043933	0.00338769	3.41568	3.16716	9	1010	macromolecular complex subunit organization	0.00434261	3	dgt4; msd5; Axs; spd-2; grp; BigH1; mars; Chrac-14; wac
embryo	GO:0007526	0.00344014	25.7214	0.0878025	2	28	larval somatic muscle development	0.00438044	3	akirin; lola
embryo	GO:0030071	0.00368767	24.7668	0.0909383	2	29	regulation of mitotic metaphase/anaphase transition	0.00460356	3	APC7; CycA
embryo	GO:0090068	0.00368767	24.7668	0.0909383	2	29	positive regulation of cell cycle process	0.00460356	3	APC7; CycE
embryo	GO:1902099	0.00368767	24.7668	0.0909383	2	29	regulation of metaphase/anaphase transition of cell cycle	0.00460356	3	APC7; CycA
embryo	GO:0043170	0.00398952	2.47042	13.4338	22	4284	macromolecule metabolic process	0.00492376	3	APC7; CG6758; shu; CycA; smg; akirin; CG5199; hd; Skp2; CycE; grp; CG10336; lok; BigH1; Rad17; gwl; geminin; lola; mael; cerv; Chrac-14; AGO3
embryo	GO:0051128	0.00399572	3.93449	2.06963	7	660	regulation of cellular component organization	0.00492376	3	dgt4; APC7; CycA; CycE; gwl; mars; mael
embryo	GO:0010927	0.0043027	6.66521	0.667926	4	213	cellular component assembly involved in morphogenesis	0.00526805	3	hd; CycE; geminin; mael
embryo	GO:0051306	0.00447852	22.2847	0.100346	2	32	mitotic sister chromatid separation	0.00544839	3	APC7; CycA
embryo	GO:0000075	0.00451834	9.85096	0.335531	3	107	cell cycle checkpoint	0.00546204	3	grp; CG10336; lok
embryo	GO:0007091	0.00475805	21.5641	0.103482	2	33	metaphase/anaphase transition of mitotic cell cycle	0.00564465	3	APC7; CycA
embryo	GO:0044784	0.00475805	21.5641	0.103482	2	33	metaphase/anaphase transition of cell cycle	0.00564465	3	APC7; CycA
embryo	GO:0045931	0.00475805	21.5641	0.103482	2	33	positive regulation of mitotic cell cycle	0.00564465	3	APC7; CycE
embryo	GO:0044237	0.00496479	2.41427	14.5815	23	4650	cellular metabolic process	0.00584051	3	APC7; CG6758; shu; CycA; smg; akirin; CG5199; hd; Skp2; CycE; grp; CG10336; lok; BigH1; Rad17; gwl; dnk; geminin; lola; mael; cerv; Chrac-14; AGO3
embryo	GO:0010965	0.00504546	20.8885	0.106617	2	34	regulation of mitotic sister chromatid separation	0.00584051	3	APC7; CycA
embryo	GO:0033045	0.00504546	20.8885	0.106617	2	34	regulation of sister chromatid segregation	0.00584051	3	APC7; CycA
embryo	GO:0033047	0.00504546	20.8885	0.106617	2	34	regulation of mitotic sister chromatid segregation	0.00584051	3	APC7; CycA
embryo	GO:0007281	0.00509257	3.42798	2.74696	8	876	germ cell development	0.00585952	3	shu; zpg; hd; CycE; lok; geminin; lola; mael
embryo	GO:0009987	0.00548142	2.8305	24.1112	32	7689	cellular process	0.00626917	3	dgt4; APC7; CG6758; shu; msd5; dah; Axs; spd-2; CycA; smg; akirin; zpg; CG5199; BoYb; hd; Skp2; CycE; grp; CG10336; lok; BigH1; Rad17; gwl; dnk; geminin; mars; lola; mael; cerv; Chrac-14; wac; AGO3
embryo	GO:0000956	0.00564371	19.6566	0.112889	2	36	nuclear-transcribed mRNA catabolic process	0.00641636	3	smg; AGO3
embryo	GO:0010604	0.00589035	4.09557	1.67138	6	533	positive regulation of macromolecule metabolic process	0.00665088	3	APC7; smg; akirin; lok; lola; AGO3
embryo	GO:0016321	0.00595445	19.0934	0.116025	2	37	female meiosis chromosome segregation	0.00665088	3	Axs; grp
embryo	GO:0051983	0.00595445	19.0934	0.116025	2	37	regulation of chromosome segregation	0.00665088	3	APC7; CycA
embryo	GO:0044702	0.00618122	3.09052	3.4682	9	1106	single organism reproductive process	0.00686403	3	shu; spd-2; zpg; hd; CycE; lok; geminin; lola; mael
embryo	GO:0000212	0.00627287	18.5616	0.119161	2	38	meiotic spindle organization	0.00692554	3	Axs; wac
embryo	GO:0050789	0.00645171	2.38275	10.3419	18	3298	regulation of biological process	0.00708205	3	dgt4; APC7; CycA; smg; akirin; BoYb; Skp2; CycE; grp; CG10336; lok; BigH1; gwl; geminin; mars; lola; mael; AGO3
embryo	GO:0031330	0.00727371	17.1296	0.128568	2	41	negative regulation of cellular catabolic process	0.00793873	3	CycA; CycE
embryo	GO:0031325	0.00733186	3.90184	1.74978	6	558	positive regulation of cellular metabolic process	0.00795674	3	APC7; smg; akirin; lok; lola; AGO3
embryo	GO:0071824	0.00742772	8.182	0.401383	3	128	protein-DNA complex subunit organization	0.00801522	3	BigH1; mars; Chrac-14
embryo	GO:0006950	0.00751779	2.98859	3.57482	9	1140	response to stress	0.00806684	3	akirin; CG5199; CycE; grp; CG10336; lok; Rad17; cerv; Chrac-14
embryo	GO:0051297	0.0077508	8.05184	0.407655	3	130	centrosome organization	0.00827041	3	spd-2; grp; gwl
embryo	GO:0048518	0.0079508	2.95977	3.60618	9	1150	positive regulation of biological process	0.00832723	3	APC7; smg; akirin; Skp2; CycE; CG10336; lok; lola; AGO3
embryo	GO:0009895	0.00797844	16.2914	0.13484	2	43	negative regulation of catabolic process	0.00832723	3	CycA; CycE
embryo	GO:0031124	0.00797844	16.2914	0.13484	2	43	mRNA 3'-end processing	0.00832723	3	smg; AGO3
embryo	GO:0031146	0.00797844	16.2914	0.13484	2	43	SCF-dependent proteasomal ubiquitin-dependent protein catabolic process	0.00832723	3	CG6758; Skp2
embryo	GO:0006323	0.00808212	7.92571	0.413926	3	132	DNA packaging	0.00838959	3	BigH1; gwl; Chrac-14
embryo	GO:0051304	0.00834192	15.9022	0.137975	2	44	chromosome separation	0.00861247	3	APC7; CycA
embryo	GO:0006281	0.00842171	7.80344	0.420198	3	134	DNA repair	0.0086481	3	lok; Rad17; cerv
embryo	GO:0022412	0.00870768	3.10627	3.00724	8	959	cellular process involved in reproduction in multicellular organism	0.00880494	3	shu; zpg; hd; CycE; lok; geminin; lola; mael
embryo	GO:0006402	0.00871274	15.5311	0.141111	2	45	mRNA catabolic process	0.00880494	3	smg; AGO3
embryo	GO:0070507	0.00871274	15.5311	0.141111	2	45	regulation of microtubule cytoskeleton organization	0.00880494	3	gwl; mars
embryo	GO:0051276	0.00901577	3.72491	1.82817	6	583	chromosome organization	0.00906322	3	APC7; CycA; BigH1; gwl; mars; Chrac-14
embryo	GO:0019953	0.00993191	2.8467	3.73474	9	1191	sexual reproduction	0.00993191	3	shu; spd-2; zpg; hd; CycE; lok; geminin; lola; mael
embryo	GO:0090304	6.10737e-05	4.24507	5.14971	15	1731	nucleic acid metabolic process	0.00289947	4	mei-38; ago; Gcn5; Atu; CG7102; esc; Alh; CycC; EloA; IntS12; Slu7; Pms2; Trf2; gpp; nbs
embryo	GO:1902589	6.78169e-05	4.56218	3.95377	13	1329	single-organism organelle organization	0.00289947	4	mei-38; ago; Ndc80; Gcn5; Atu; esc; Spc25; loco; Slu7; Pms2; ana3; gpp; nbs
embryo	GO:0007049	8.61228e-05	4.9965	2.91252	11	979	cell cycle	0.00289947	4	mei-38; ago; Ndc80; Spc25; CycC; Tsc1; Slu7; Pms2; ana3; gpp; nbs
embryo	GO:1903047	0.000167927	6.05875	1.6303	8	548	mitotic cell cycle process	0.0037408	4	mei-38; ago; Ndc80; Spc25; CycC; Slu7; ana3; nbs
embryo	GO:0048731	0.000271265	3.47499	7.30064	17	2454	system development	0.0037408	4	dib; ago; Ndc80; CG10222; Gcn5; esc; Alh; CycC; mira; loco; EloA; Tsc1; IntS12; Smurf; CG14478; link; Trf2
embryo	GO:1901360	0.00032842	3.4804	6.67291	16	2243	organic cyclic compound metabolic process	0.0037408	4	mei-38; dib; ago; Gcn5; Atu; CG7102; esc; Alh; CycC; EloA; IntS12; Slu7; Pms2; Trf2; gpp; nbs
embryo	GO:0016043	0.000357383	3.32596	8.23181	18	2767	cellular component organization	0.0037408	4	mei-38; ago; Ndc80; Gcn5; Atu; CG12393; CG7102; esc; Spc25; mira; loco; Tsc1; Slu7; Pms2; ana3; Trf2; gpp; nbs
embryo	GO:0008283	0.000406059	7.1459	0.990673	6	333	cell proliferation	0.0037408	4	CG12090; ago; Atu; mira; loco; Tsc1
embryo	GO:0006139	0.000409424	3.48709	6.07791	15	2043	nucleobase-containing compound metabolic process	0.0037408	4	mei-38; ago; Gcn5; Atu; CG7102; esc; Alh; CycC; EloA; IntS12; Slu7; Pms2; Trf2; gpp; nbs
embryo	GO:0000278	0.000428639	5.23249	1.87127	8	629	mitotic cell cycle	0.0037408	4	mei-38; ago; Ndc80; Spc25; CycC; Slu7; ana3; nbs
embryo	GO:0006996	0.000457694	3.54989	5.44126	14	1829	organelle organization	0.0037408	4	mei-38; ago; Ndc80; Gcn5; Atu; CG12393; esc; Spc25; loco; Slu7; Pms2; ana3; gpp; nbs
embryo	GO:0007052	0.000464298	8.81366	0.657474	5	221	mitotic spindle organization	0.0037408	4	mei-38; Ndc80; Spc25; Slu7; ana3
embryo	GO:0071840	0.00048563	3.22576	8.42816	18	2833	cellular component organization or biogenesis	0.0037408	4	mei-38; ago; Ndc80; Gcn5; Atu; CG12393; CG7102; esc; Spc25; mira; loco; Tsc1; Slu7; Pms2; ana3; Trf2; gpp; nbs
embryo	GO:0043933	0.00054606	4.22222	3.00474	10	1010	macromolecular complex subunit organization	0.0037408	4	mei-38; Ndc80; Gcn5; Atu; CG7102; esc; Spc25; Slu7; ana3; gpp
embryo	GO:0007080	0.000557829	70.8	0.0356999	2	12	mitotic metaphase plate congression	0.0037408	4	Ndc80; Spc25
embryo	GO:0022402	0.000592602	4.50974	2.48114	9	834	cell cycle process	0.0037408	4	mei-38; ago; Ndc80; Spc25; CycC; Slu7; Pms2; ana3; nbs
embryo	GO:0046483	0.000662033	3.30806	6.34864	15	2134	heterocycle metabolic process	0.00393325	4	mei-38; ago; Gcn5; Atu; CG7102; esc; Alh; CycC; EloA; IntS12; Slu7; Pms2; Trf2; gpp; nbs
embryo	GO:0006725	0.000794247	3.2414	6.45574	15	2170	cellular aromatic compound metabolic process	0.00445661	4	mei-38; ago; Gcn5; Atu; CG7102; esc; Alh; CycC; EloA; IntS12; Slu7; Pms2; Trf2; gpp; nbs
embryo	GO:0034472	0.000882479	54.4484	0.0446249	2	15	snRNA 3'-end processing	0.00465679	4	CycC; IntS12
embryo	GO:0007051	0.00093597	7.50185	0.767548	5	258	spindle organization	0.00465679	4	mei-38; Ndc80; Spc25; Slu7; ana3
embryo	GO:0038202	0.00100666	50.5551	0.0475999	2	16	TORC1 signaling	0.00465679	4	CG12090; Tsc1
embryo	GO:0016569	0.00106046	9.96624	0.455174	4	153	covalent chromatin modification	0.00465679	4	Gcn5; Atu; esc; gpp
embryo	GO:0016570	0.00106046	9.96624	0.455174	4	153	histone modification	0.00465679	4	Gcn5; Atu; esc; gpp
embryo	GO:0016180	0.00113875	47.181	0.0505749	2	17	snRNA processing	0.00479222	4	CycC; IntS12
embryo	GO:0051310	0.00127869	44.2286	0.0535499	2	18	metaphase plate congression	0.00516591	4	Ndc80; Spc25
embryo	GO:0006310	0.00141245	15.1078	0.223125	3	75	DNA recombination	0.00521684	4	mei-38; Pms2; nbs
embryo	GO:0043628	0.00142645	41.6235	0.0565249	2	19	ncRNA 3'-end processing	0.00521684	4	CycC; IntS12
embryo	GO:0051276	0.00144625	4.78981	1.73442	7	583	chromosome organization	0.00521684	4	Ndc80; Gcn5; Atu; esc; Spc25; gpp; nbs
embryo	GO:0050000	0.00158198	39.3079	0.0594999	2	20	chromosome localization	0.005326	4	Ndc80; Spc25
embryo	GO:0051303	0.00158198	39.3079	0.0594999	2	20	establishment of chromosome localization	0.005326	4	Ndc80; Spc25
embryo	GO:0048585	0.00190949	6.34543	0.901423	5	303	negative regulation of response to stimulus	0.00622126	4	ago; loco; Pli; Tsc1; Smurf
embryo	GO:0002165	0.00202126	4.50207	1.83855	7	618	instar larval or pupal development	0.0063796	4	dib; Alh; CycC; EloA; Tsc1; CG14478; Trf2
embryo	GO:0016073	0.00209474	33.6844	0.0684249	2	23	snRNA metabolic process	0.00641116	4	CycC; IntS12
embryo	GO:0000079	0.0024746	30.7503	0.0743748	2	25	regulation of cyclin-dependent protein serine/threonine kinase activity	0.00714098	4	ago; CycC
embryo	GO:1904029	0.0024746	30.7503	0.0743748	2	25	regulation of cyclin-dependent protein kinase activity	0.00714098	4	ago; CycC
embryo	GO:0080090	0.00292819	3.1506	4.40002	11	1479	regulation of primary metabolic process	0.00780898	4	ago; Gcn5; esc; Alh; CycC; mira; EloA; Pli; Smurf; Trf2; gpp
embryo	GO:0042325	0.00293291	7.46985	0.600949	4	202	regulation of phosphorylation	0.00780898	4	ago; CycC; Pli; Tsc1
embryo	GO:0008356	0.00303564	11.4288	0.291549	3	98	asymmetric cell division	0.00780898	4	CG12090; mira; loco
embryo	GO:0071456	0.00310055	27.1956	0.0832998	2	28	cellular response to hypoxia	0.00780898	4	ago; Tsc1
embryo	GO:0019222	0.00332187	2.97244	5.16459	12	1736	regulation of metabolic process	0.00780898	4	ago; Gcn5; esc; Alh; CycC; mira; EloA; Pli; Tsc1; Smurf; Trf2; gpp
embryo	GO:0009987	0.00333025	3.19931	22.8747	31	7689	cellular process	0.00780898	4	mei-38; CG12090; dib; ago; Ndc80; CG10222; Gcn5; CG5026; Atu; CG12393; CG7102; CG14937; esc; Alh; Spc25; CycC; mira; loco; EloA; Pli; Tsc1; IntS12; Slu7; Smurf; Pms2; link; ana3; Trf2; KP78a; gpp; nbs
embryo	GO:0032502	0.00351601	2.57468	11.6293	20	3909	developmental process	0.00780898	4	CG12090; dib; ago; Ndc80; CG10222; Gcn5; Atu; esc; Alh; CycC; mira; loco; EloA; Tsc1; IntS12; Smurf; CG14478; link; Trf2; gpp
embryo	GO:0036294	0.00355478	25.249	0.0892498	2	30	cellular response to decreased oxygen levels	0.00780898	4	ago; Tsc1
embryo	GO:0071453	0.00355478	25.249	0.0892498	2	30	cellular response to oxygen levels	0.00780898	4	ago; Tsc1
embryo	GO:0009791	0.00360754	4.03412	2.03787	7	685	post-embryonic development	0.00780898	4	dib; Alh; CycC; EloA; Tsc1; CG14478; Trf2
embryo	GO:0031323	0.00370982	3.04431	4.53389	11	1524	regulation of cellular metabolic process	0.00780898	4	ago; Gcn5; esc; Alh; CycC; EloA; Pli; Tsc1; Smurf; Trf2; gpp
embryo	GO:0051726	0.00374313	5.39533	1.05315	5	354	regulation of cell cycle	0.00780898	4	ago; CycC; Tsc1; gpp; nbs
embryo	GO:0016070	0.00378683	3.03517	4.54579	11	1528	RNA metabolic process	0.00780898	4	Gcn5; Atu; CG7102; esc; Alh; CycC; EloA; IntS12; Slu7; Trf2; gpp
embryo	GO:0044260	0.00384204	2.56016	10.826	19	3639	cellular macromolecule metabolic process	0.00780898	4	mei-38; ago; Gcn5; Atu; CG7102; CG14937; esc; Alh; CycC; EloA; Pli; IntS12; Slu7; Smurf; Pms2; Trf2; KP78a; gpp; nbs
embryo	GO:0048523	0.00386583	3.36563	3.24274	9	1090	negative regulation of cellular process	0.00780898	4	ago; esc; CycC; loco; Pli; Tsc1; Smurf; gpp; nbs
embryo	GO:0060255	0.00398506	3.01252	4.57554	11	1538	regulation of macromolecule metabolic process	0.00789197	4	ago; Gcn5; esc; Alh; CycC; mira; EloA; Pli; Smurf; Trf2; gpp
embryo	GO:0006368	0.00429064	22.8	0.0981748	2	33	transcription elongation from RNA polymerase II promoter	0.00817651	4	Atu; EloA
embryo	GO:0007131	0.00429064	22.8	0.0981748	2	33	reciprocal meiotic recombination	0.00817651	4	mei-38; Pms2
embryo	GO:0035825	0.0045503	22.0857	0.10115	2	34	reciprocal DNA recombination	0.00851075	4	mei-38; Pms2
embryo	GO:0044238	0.00471904	2.50189	14.6905	23	4938	primary metabolic process	0.0086411	4	mei-38; dib; ago; Gcn5; CG5026; Atu; CG7102; CG14937; esc; Alh; CycC; mira; EloA; Pli; Tsc1; IntS12; Slu7; Smurf; Pms2; Trf2; KP78a; gpp; nbs
embryo	GO:0006354	0.00481707	21.4147	0.104125	2	35	DNA-templated transcription, elongation	0.0086411	4	Atu; EloA
embryo	GO:0018205	0.00487666	9.59422	0.345099	3	116	peptidyl-lysine modification	0.0086411	4	Gcn5; esc; gpp
embryo	GO:0044237	0.00519894	2.46304	13.8337	22	4650	cellular metabolic process	0.00864971	4	mei-38; dib; ago; Gcn5; CG5026; Atu; CG7102; CG14937; esc; Alh; CycC; EloA; Pli; Tsc1; IntS12; Slu7; Smurf; Pms2; Trf2; KP78a; gpp; nbs
embryo	GO:0019220	0.00534021	6.27466	0.711024	4	239	regulation of phosphate metabolic process	0.00864971	4	ago; CycC; Pli; Tsc1
embryo	GO:0051174	0.00534021	6.27466	0.711024	4	239	regulation of phosphorus metabolic process	0.00864971	4	ago; CycC; Pli; Tsc1
embryo	GO:0031929	0.00537179	20.1878	0.110075	2	37	TOR signaling	0.00864971	4	CG12090; Tsc1
embryo	GO:0018022	0.00565965	19.6254	0.11305	2	38	peptidyl-lysine methylation	0.00864971	4	esc; gpp
embryo	GO:0034968	0.00565965	19.6254	0.11305	2	38	histone lysine methylation	0.00864971	4	esc; gpp
embryo	GO:0007275	0.00574882	2.48123	9.46346	17	3181	multicellular organismal development	0.00864971	4	dib; ago; Ndc80; CG10222; Gcn5; esc; Alh; CycC; mira; loco; EloA; Tsc1; IntS12; Smurf; CG14478; link; Trf2
embryo	GO:0016568	0.00582641	6.11543	0.728874	4	245	chromatin modification	0.00864971	4	Gcn5; Atu; esc; gpp
embryo	GO:0006355	0.00588345	3.3593	2.82327	8	949	regulation of transcription, DNA-templated	0.00864971	4	Gcn5; esc; Alh; CycC; EloA; Smurf; Trf2; gpp
embryo	GO:1903506	0.00588345	3.3593	2.82327	8	949	regulation of nucleic acid-templated transcription	0.00864971	4	Gcn5; esc; Alh; CycC; EloA; Smurf; Trf2; gpp
embryo	GO:2001141	0.00588345	3.3593	2.82327	8	949	regulation of RNA biosynthetic process	0.00864971	4	Gcn5; esc; Alh; CycC; EloA; Smurf; Trf2; gpp
embryo	GO:0055059	0.00595445	19.0934	0.116025	2	39	asymmetric neuroblast division	0.00864971	4	mira; loco
embryo	GO:0009968	0.00599485	6.0641	0.734824	4	247	negative regulation of signal transduction	0.00864971	4	loco; Pli; Tsc1; Smurf
embryo	GO:0036445	0.00625616	18.5895	0.119	2	40	neuronal stem cell division	0.008776	4	mira; loco
embryo	GO:0055057	0.00625616	18.5895	0.119	2	40	neuroblast division	0.008776	4	mira; loco
embryo	GO:0014070	0.00669022	8.52686	0.386749	3	130	response to organic cyclic compound	0.00911396	4	Tsc1; Trf2; nbs
embryo	GO:0007399	0.00687022	2.7758	4.91172	11	1651	nervous system development	0.00911396	4	dib; ago; Ndc80; CG10222; Gcn5; esc; mira; loco; IntS12; link; Trf2
embryo	GO:0048856	0.007034	2.39755	10.5017	18	3530	anatomical structure development	0.00911396	4	CG12090; dib; ago; Ndc80; CG10222; Gcn5; esc; Alh; CycC; mira; loco; EloA; Tsc1; IntS12; Smurf; CG14478; link; Trf2
embryo	GO:0030154	0.00713835	2.52969	7.19651	14	2419	cell differentiation	0.00911396	4	CG12090; ago; Ndc80; CG10222; Gcn5; esc; mira; loco; Tsc1; IntS12; Smurf; link; Trf2; gpp
embryo	GO:0008105	0.00720229	17.2251	0.127925	2	43	asymmetric protein localization	0.00911396	4	mira; loco
embryo	GO:0031146	0.00720229	17.2251	0.127925	2	43	SCF-dependent proteasomal ubiquitin-dependent protein catabolic process	0.00911396	4	ago; CG14937
embryo	GO:0022008	0.00724132	2.87299	4.24234	10	1426	neurogenesis	0.00911396	4	ago; Ndc80; CG10222; Gcn5; esc; mira; loco; IntS12; link; Trf2
embryo	GO:0044763	0.00735065	2.42196	17.133	25	5759	single-organism cellular process	0.00911396	4	mei-38; CG12090; dib; ago; Ndc80; CG10222; Gcn5; CG5026; Atu; esc; Spc25; CycC; mira; loco; Pli; Tsc1; IntS12; Slu7; Smurf; Pms2; link; ana3; Trf2; gpp; nbs
embryo	GO:0031399	0.0073631	5.70449	0.779448	4	262	regulation of protein modification process	0.00911396	4	ago; esc; CycC; Pli
embryo	GO:0043279	0.0075312	16.8136	0.1309	2	44	response to alkaloid	0.00911396	4	Tsc1; nbs
embryo	GO:0060438	0.0075312	16.8136	0.1309	2	44	trachea development	0.00911396	4	ago; Tsc1
embryo	GO:0016571	0.00786681	16.4213	0.133875	2	45	histone methylation	0.00911396	4	esc; gpp
embryo	GO:0045786	0.00788455	8.01634	0.410549	3	138	negative regulation of cell cycle	0.00911396	4	ago; CycC; nbs
embryo	GO:0009653	0.00790815	2.62485	5.73876	12	1929	anatomical structure morphogenesis	0.00911396	4	CG12090; dib; ago; Gcn5; esc; CycC; loco; EloA; Tsc1; Smurf; CG14478; Trf2
embryo	GO:0044767	0.00798427	2.34592	11.5043	19	3867	single-organism developmental process	0.00911396	4	CG12090; dib; ago; Ndc80; CG10222; Gcn5; esc; Alh; CycC; mira; loco; EloA; Tsc1; IntS12; Smurf; CG14478; link; Trf2; gpp
embryo	GO:0023057	0.00806705	5.5506	0.800273	4	269	negative regulation of signaling	0.00911396	4	loco; Pli; Tsc1; Smurf
embryo	GO:0006351	0.0082139	3.15857	2.98689	8	1004	transcription, DNA-templated	0.00911396	4	Gcn5; Atu; esc; Alh; CycC; EloA; Trf2; gpp
embryo	GO:0097659	0.0082139	3.15857	2.98689	8	1004	nucleic acid-templated transcription	0.00911396	4	Gcn5; Atu; esc; Alh; CycC; EloA; Trf2; gpp
embryo	GO:0032774	0.0083587	3.14825	2.99582	8	1007	RNA biosynthetic process	0.00911396	4	Gcn5; Atu; esc; Alh; CycC; EloA; Trf2; gpp
embryo	GO:0010648	0.00848862	5.46626	0.812173	4	273	negative regulation of cell communication	0.00911396	4	loco; Pli; Tsc1; Smurf
embryo	GO:0000226	0.00853162	4.39187	1.28222	5	431	microtubule cytoskeleton organization	0.00911396	4	mei-38; Ndc80; Spc25; Slu7; ana3
embryo	GO:0050794	0.00862467	2.38416	8.98151	16	3019	regulation of cellular process	0.00911396	4	CG12090; ago; Gcn5; Atu; esc; Alh; CycC; mira; loco; EloA; Pli; Tsc1; Smurf; Trf2; gpp; nbs
embryo	GO:1901987	0.00869106	7.72689	0.425424	3	143	regulation of cell cycle phase transition	0.00911396	4	ago; CycC; nbs
embryo	GO:1901990	0.00869106	7.72689	0.425424	3	143	regulation of mitotic cell cycle phase transition	0.00911396	4	ago; CycC; nbs
embryo	GO:0048519	0.00875301	2.92956	3.67412	9	1235	negative regulation of biological process	0.00911396	4	ago; esc; CycC; loco; Pli; Tsc1; Smurf; gpp; nbs
embryo	GO:0048103	0.00927543	15.0188	0.145775	2	49	somatic stem cell division	0.00950979	4	mira; loco
embryo	GO:0051252	0.00932147	3.08434	3.05234	8	1026	regulation of RNA metabolic process	0.00950979	4	Gcn5; esc; Alh; CycC; EloA; Smurf; Trf2; gpp
embryo	GO:0006259	0.00948967	5.28537	0.838948	4	282	DNA metabolic process	0.00958456	4	mei-38; ago; Pms2; nbs
embryo	GO:0071900	0.00964393	14.7048	0.14875	2	50	regulation of protein serine/threonine kinase activity	0.00964393	4	ago; CycC
embryo	GO:0007296	1.74702e-10	Inf	0.00192973	3	8	vitellogenesis	2.62053e-09	5	Yp1; Yp2; Yp3
embryo	GO:0007028	3.4234e-07	Inf	0.021227	3	88	cytoplasm organization	2.56755e-06	5	Yp1; Yp2; Yp3
embryo	GO:0007548	5.68105e-07	Inf	0.0250864	3	104	sex differentiation	2.84052e-06	5	Yp1; Yp2; Yp3
embryo	GO:0007292	0.000228243	Inf	0.183565	3	761	female gamete generation	0.000855912	5	Yp1; Yp2; Yp3
embryo	GO:0022412	0.000457145	Inf	0.231326	3	959	cellular process involved in reproduction in multicellular organism	0.00121394	5	Yp1; Yp2; Yp3
embryo	GO:0003006	0.000510642	Inf	0.24001	3	995	developmental process involved in reproduction	0.00121394	5	Yp1; Yp2; Yp3
embryo	GO:0007276	0.000566505	Inf	0.248452	3	1030	gamete generation	0.00121394	5	Yp1; Yp2; Yp3
embryo	GO:0044702	0.000701527	Inf	0.266785	3	1106	single organism reproductive process	0.00124675	5	Yp1; Yp2; Yp3
embryo	GO:0048609	0.000824239	Inf	0.281499	3	1167	multicellular organismal reproductive process	0.00124675	5	Yp1; Yp2; Yp3
embryo	GO:0019953	0.00087619	Inf	0.287288	3	1191	sexual reproduction	0.00124675	5	Yp1; Yp2; Yp3
embryo	GO:0044703	0.00091428	Inf	0.291389	3	1208	multi-organism reproductive process	0.00124675	5	Yp1; Yp2; Yp3
embryo	GO:0022414	0.00107009	Inf	0.307068	3	1273	reproductive process	0.00133761	5	Yp1; Yp2; Yp3
embryo	GO:0032504	0.00132529	Inf	0.329742	3	1367	multicellular organism reproduction	0.00152918	5	Yp1; Yp2; Yp3
embryo	GO:0051704	0.0018879	Inf	0.37099	3	1538	multi-organism process	0.00202275	5	Yp1; Yp2; Yp3
embryo	GO:0000003	0.00212172	Inf	0.385704	3	1599	reproduction	0.00212172	5	Yp1; Yp2; Yp3
embryo	GO:0022402	1.60905e-16	30.0322	1.87762	19	834	cell cycle process	2.97675e-14	6	CycB; Klp61F; feo; mus101; CG8188; Cdc6; RecQ4; aurB; fzy; Grip71; Blm; aurA; pr-set7; Det; asp; ncd; dup; Incenp; cmet
embryo	GO:1903047	3.03429e-15	29.7669	1.23374	16	548	mitotic cell cycle process	1.93309e-13	6	CycB; Klp61F; feo; mus101; CG8188; RecQ4; aurB; fzy; Grip71; aurA; Det; asp; ncd; dup; Incenp; cmet
embryo	GO:0007049	3.13474e-15	25.1772	2.20407	19	979	cell cycle	1.93309e-13	6	CycB; Klp61F; feo; mus101; CG8188; Cdc6; RecQ4; aurB; fzy; Grip71; Blm; aurA; pr-set7; Det; asp; ncd; dup; Incenp; cmet
embryo	GO:0000278	2.62455e-14	25.6574	1.4161	16	629	mitotic cell cycle	1.21386e-12	6	CycB; Klp61F; feo; mus101; CG8188; RecQ4; aurB; fzy; Grip71; aurA; Det; asp; ncd; dup; Incenp; cmet
embryo	GO:0007067	1.46784e-13	36.1815	0.594356	12	264	mitotic nuclear division	5.43103e-12	6	CycB; Klp61F; mus101; CG8188; aurB; fzy; Grip71; aurA; Det; ncd; Incenp; cmet
embryo	GO:0051301	1.19778e-12	29.9653	0.709174	12	315	cell division	3.69316e-11	6	CycB; feo; Cdc6; RecQ4; aurB; fzy; aurA; Det; asp; ncd; dup; Incenp
embryo	GO:0000280	1.29065e-11	21.2619	1.12342	13	499	nuclear division	3.153e-10	6	CycB; Klp61F; mus101; CG8188; aurB; fzy; Grip71; Blm; aurA; Det; ncd; Incenp; cmet
embryo	GO:1902589	1.36346e-11	15.2375	2.99204	18	1329	single-organism organelle organization	3.153e-10	6	CycB; Klp61F; feo; mus101; CG8188; aurB; fzy; Grip71; Blm; aurA; Tango9; pr-set7; Det; asp; ncd; dup; Incenp; cmet
embryo	GO:0048285	1.82747e-11	20.6423	1.15494	13	513	organelle fission	3.75646e-10	6	CycB; Klp61F; mus101; CG8188; aurB; fzy; Grip71; Blm; aurA; Det; ncd; Incenp; cmet
embryo	GO:0000226	4.74228e-11	21.4618	0.97033	12	431	microtubule cytoskeleton organization	8.77322e-10	6	CycB; Klp61F; feo; aurB; Grip71; aurA; Det; asp; ncd; dup; Incenp; cmet
embryo	GO:0006996	2.54259e-10	12.3622	4.11771	19	1829	organelle organization	4.27617e-09	6	CycB; Klp61F; feo; mus101; CG8188; RecQ4; aurB; fzy; Grip71; Blm; aurA; Tango9; pr-set7; Det; asp; ncd; dup; Incenp; cmet
embryo	GO:0016043	3.71399e-10	12.9088	6.22948	22	2767	cellular component organization	5.72574e-09	6	CycB; retn; Klp61F; feo; mus101; CG8188; Cdc6; RecQ4; CG31961; aurB; fzy; Grip71; Blm; aurA; Tango9; pr-set7; Det; asp; ncd; dup; Incenp; cmet
embryo	GO:0071840	6.01323e-10	12.5196	6.37807	22	2833	cellular component organization or biogenesis	8.46292e-09	6	CycB; retn; Klp61F; feo; mus101; CG8188; Cdc6; RecQ4; CG31961; aurB; fzy; Grip71; Blm; aurA; Tango9; pr-set7; Det; asp; ncd; dup; Incenp; cmet
embryo	GO:0007017	6.40437e-10	16.8764	1.21573	12	540	microtubule-based process	8.46292e-09	6	CycB; Klp61F; feo; aurB; Grip71; aurA; Det; asp; ncd; dup; Incenp; cmet
embryo	GO:0007052	7.73387e-10	27.2525	0.497548	9	221	mitotic spindle organization	9.53844e-09	6	Klp61F; feo; aurB; Grip71; Det; asp; ncd; Incenp; cmet
embryo	GO:0090307	9.61296e-10	78.4313	0.110316	6	49	mitotic spindle assembly	1.1115e-08	6	aurB; Grip71; Det; ncd; Incenp; cmet
embryo	GO:1902850	1.23427e-09	74.9333	0.114819	6	51	microtubule cytoskeleton organization involved in mitosis	1.34318e-08	6	aurB; Grip71; Det; ncd; Incenp; cmet
embryo	GO:0007051	3.02977e-09	23.1325	0.580847	9	258	spindle organization	3.11393e-08	6	Klp61F; feo; aurB; Grip71; Det; asp; ncd; Incenp; cmet
embryo	GO:0000281	5.54161e-09	57.0878	0.146338	6	65	mitotic cytokinesis	5.39578e-08	6	CycB; feo; aurB; Det; dup; Incenp
embryo	GO:0007010	8.21783e-09	13.2662	1.52191	12	676	cytoskeleton organization	7.60149e-08	6	CycB; Klp61F; feo; aurB; Grip71; aurA; Det; asp; ncd; dup; Incenp; cmet
embryo	GO:0051297	1.1431e-08	33.2954	0.292675	7	130	centrosome organization	1.00701e-07	6	Klp61F; feo; Grip71; aurA; asp; ncd; dup
embryo	GO:0065003	1.41215e-08	16.1367	0.95232	10	423	macromolecular complex assembly	1.18749e-07	6	Klp61F; Cdc6; CG31961; aurB; Grip71; Det; asp; ncd; Incenp; cmet
embryo	GO:0031023	1.48686e-08	31.9818	0.303932	7	135	microtubule organizing center organization	1.19596e-07	6	Klp61F; feo; Grip71; aurA; asp; ncd; dup
embryo	GO:0051225	2.64938e-08	43.1154	0.189113	6	84	spindle assembly	2.04223e-07	6	aurB; Grip71; Det; ncd; Incenp; cmet
embryo	GO:0051298	2.84626e-08	42.5662	0.191364	6	85	centrosome duplication	2.10623e-07	6	Klp61F; feo; Grip71; aurA; ncd; dup
embryo	GO:0006461	3.89667e-08	16.9683	0.778966	9	346	protein complex assembly	2.77263e-07	6	Klp61F; CG31961; aurB; Grip71; Det; asp; ncd; Incenp; cmet
embryo	GO:0070271	4.19761e-08	16.8144	0.78572	9	349	protein complex biogenesis	2.87614e-07	6	Klp61F; CG31961; aurB; Grip71; Det; asp; ncd; Incenp; cmet
embryo	GO:0051726	4.74455e-08	16.5638	0.796977	9	354	regulation of cell cycle	3.13479e-07	6	Klp61F; feo; mus101; RecQ4; aurB; fzy; Grip71; ncd; cmet
embryo	GO:0007098	8.53922e-08	34.9801	0.229637	6	102	centrosome cycle	5.44743e-07	6	Klp61F; feo; Grip71; aurA; ncd; dup
embryo	GO:0061640	1.20245e-07	32.9064	0.243145	6	108	cytoskeleton-dependent cytokinesis	7.41509e-07	6	CycB; feo; aurB; Det; dup; Incenp
embryo	GO:0000910	1.49421e-07	31.6544	0.252151	6	112	cytokinesis	8.91708e-07	6	CycB; feo; aurB; Det; dup; Incenp
embryo	GO:0010564	2.54772e-07	20.6633	0.459275	7	204	regulation of cell cycle process	1.4729e-06	6	Klp61F; feo; mus101; RecQ4; aurB; fzy; ncd
embryo	GO:0000003	2.94335e-07	7.88534	3.5999	15	1599	reproduction	1.65006e-06	6	retn; feo; mus101; RecQ4; aurB; fzy; Grip71; Blm; aurA; Det; asp; ncd; dup; muskelin; Incenp
embryo	GO:0022607	3.20593e-07	9.26803	2.11852	12	941	cellular component assembly	1.7444e-06	6	Klp61F; Cdc6; RecQ4; CG31961; aurB; Grip71; Det; asp; ncd; dup; Incenp; cmet
embryo	GO:0060236	5.68021e-07	297.696	0.0180108	3	8	regulation of mitotic spindle organization	3.0024e-06	6	Klp61F; feo; ncd
embryo	GO:0043933	6.89839e-07	8.5754	2.27386	12	1010	macromolecular complex subunit organization	3.54501e-06	6	Klp61F; feo; Cdc6; CG31961; aurB; Grip71; pr-set7; Det; asp; ncd; Incenp; cmet
embryo	GO:0044085	8.00078e-07	8.44639	2.30538	12	1024	cellular component biogenesis	3.91418e-06	6	Klp61F; Cdc6; RecQ4; CG31961; aurB; Grip71; Det; asp; ncd; dup; Incenp; cmet
embryo	GO:0071897	8.03994e-07	71.1494	0.0742944	4	33	DNA biosynthetic process	3.91418e-06	6	RecQ4; Blm; dup; Orc1
embryo	GO:0007100	8.50747e-07	248.06	0.0202621	3	9	mitotic centrosome separation	4.03559e-06	6	Klp61F; aurA; ncd
embryo	GO:0071822	9.47388e-07	10.0017	1.49264	10	663	protein complex subunit organization	4.38167e-06	6	Klp61F; feo; CG31961; aurB; Grip71; Det; asp; ncd; Incenp; cmet
embryo	GO:0098813	1.10114e-06	22.1397	0.353461	6	157	nuclear chromosome segregation	4.96857e-06	6	CycB; aurB; Det; ncd; Incenp; cmet
embryo	GO:0006260	1.99999e-06	29.756	0.213878	5	95	DNA replication	8.80948e-06	6	Cdc6; RecQ4; Blm; dup; Orc1
embryo	GO:1903046	2.09649e-06	14.8738	0.628126	7	279	meiotic cell cycle process	9.01977e-06	6	fzy; Grip71; Blm; Det; asp; ncd; Incenp
embryo	GO:0051321	2.25117e-06	14.7079	0.63488	7	282	meiotic cell cycle	9.41892e-06	6	fzy; Grip71; Blm; Det; asp; ncd; Incenp
embryo	GO:0007059	2.29109e-06	19.4033	0.40074	6	178	chromosome segregation	9.41892e-06	6	CycB; aurB; Det; ncd; Incenp; cmet
embryo	GO:0000075	3.60209e-06	26.2298	0.240894	5	107	cell cycle checkpoint	1.44867e-05	6	mus101; RecQ4; aurB; pr-set7; dup
embryo	GO:0007056	4.56669e-06	123.97	0.0337702	3	15	spindle assembly involved in female meiosis	1.79753e-05	6	Grip71; ncd; Incenp
embryo	GO:0090224	8.15295e-06	99.152	0.0405242	3	18	regulation of spindle organization	3.09589e-05	6	Klp61F; feo; ncd
embryo	GO:0007346	8.19993e-06	15.3952	0.499799	6	222	regulation of mitotic cell cycle	3.09589e-05	6	Klp61F; feo; mus101; RecQ4; fzy; ncd
embryo	GO:0030154	1.11138e-05	5.55195	5.44601	16	2419	cell differentiation	4.04006e-05	6	retn; Klp61F; feo; mus101; RecQ4; CG31961; aurB; fzy; aurA; Det; asp; dup; muskelin; Orc1; Incenp; cmet
embryo	GO:0050000	1.13558e-05	87.4729	0.0450269	3	20	chromosome localization	4.04006e-05	6	CycB; Incenp; cmet
embryo	GO:0051303	1.13558e-05	87.4729	0.0450269	3	20	establishment of chromosome localization	4.04006e-05	6	CycB; Incenp; cmet
embryo	GO:0048523	1.18084e-05	6.79442	2.45397	11	1090	negative regulation of cellular process	4.1218e-05	6	retn; Klp61F; feo; mus101; RecQ4; fzy; Blm; Tango9; pr-set7; Det; Orc1
embryo	GO:0051299	1.32285e-05	82.6067	0.0472783	3	21	centrosome separation	4.53199e-05	6	Klp61F; aurA; ncd
embryo	GO:0090306	1.52942e-05	78.2526	0.0495296	3	22	spindle assembly involved in meiosis	5.08463e-05	6	Grip71; ncd; Incenp
embryo	GO:0071103	1.53913e-05	19.1899	0.324194	5	144	DNA conformation change	5.08463e-05	6	RecQ4; aurB; Blm; pr-set7; Incenp
embryo	GO:0006277	1.75618e-05	74.334	0.051781	3	23	DNA amplification	5.69961e-05	6	RecQ4; dup; Orc1
embryo	GO:0070925	1.80653e-05	13.3187	0.574093	6	255	organelle assembly	5.69961e-05	6	aurB; Grip71; Det; ncd; Incenp; cmet
embryo	GO:0044763	1.81771e-05	6.98239	12.9655	24	5759	single-organism cellular process	5.69961e-05	6	CycB; retn; Klp61F; feo; mus101; CG8188; Cdc6; RecQ4; CG31961; aurB; fzy; Grip71; Blm; aurA; Tango9; pr-set7; Det; asp; ncd; dup; muskelin; Orc1; Incenp; cmet
embryo	GO:0048869	1.90656e-05	5.27687	5.67114	16	2519	cellular developmental process	5.87856e-05	6	retn; Klp61F; feo; mus101; RecQ4; CG31961; aurB; fzy; aurA; Det; asp; dup; muskelin; Orc1; Incenp; cmet
embryo	GO:0007399	2.03522e-05	5.69894	3.71697	13	1651	nervous system development	6.17239e-05	6	retn; Klp61F; feo; CG31961; aurB; fzy; aurA; Det; asp; dup; Orc1; Incenp; cmet
embryo	GO:0065007	2.12895e-05	5.22692	8.08008	19	3589	biological regulation	6.3525e-05	6	CycB; retn; Klp61F; feo; mus101; RecQ4; CG14036; aurB; fzy; Grip71; Blm; aurA; Tango9; pr-set7; Det; ncd; muskelin; Orc1; cmet
embryo	GO:0044772	2.48466e-05	17.2995	0.357964	5	159	mitotic cell cycle phase transition	7.29622e-05	6	CycB; mus101; CG8188; RecQ4; fzy
embryo	GO:0022008	2.57692e-05	5.83186	3.21042	12	1426	neurogenesis	7.4489e-05	6	retn; Klp61F; feo; CG31961; aurB; fzy; aurA; Det; dup; Orc1; Incenp; cmet
embryo	GO:0007126	2.71179e-05	12.3552	0.616869	6	274	meiotic nuclear division	7.71818e-05	6	fzy; Grip71; Blm; Det; ncd; Incenp
embryo	GO:0044770	2.80035e-05	16.8561	0.36697	5	163	cell cycle phase transition	7.84946e-05	6	CycB; mus101; CG8188; RecQ4; fzy
embryo	GO:0010639	2.88975e-05	27.0461	0.180108	4	80	negative regulation of organelle organization	7.97915e-05	6	Klp61F; feo; Tango9; pr-set7
embryo	GO:0051276	3.00012e-05	8.23235	1.31254	8	583	chromosome organization	8.16208e-05	6	CycB; RecQ4; aurB; Blm; pr-set7; asp; Incenp; cmet
embryo	GO:0007135	3.22418e-05	59.4432	0.0630377	3	28	meiosis II	8.64454e-05	6	fzy; Det; Incenp
embryo	GO:0007127	3.67106e-05	25.3663	0.191364	4	85	meiosis I	9.56543e-05	6	fzy; Grip71; Blm; Det
embryo	GO:0007143	3.67106e-05	25.3663	0.191364	4	85	female meiotic division	9.56543e-05	6	fzy; Grip71; ncd; Incenp
embryo	GO:0048519	3.85602e-05	5.91287	2.78041	11	1235	negative regulation of biological process	9.8264e-05	6	retn; Klp61F; feo; mus101; RecQ4; fzy; Blm; Tango9; pr-set7; Det; Orc1
embryo	GO:0033043	3.87745e-05	11.5604	0.657393	6	292	regulation of organelle organization	9.8264e-05	6	Klp61F; feo; fzy; Tango9; pr-set7; ncd
embryo	GO:0050794	4.2969e-05	4.8428	6.79682	17	3019	regulation of cellular process	0.000107422	6	retn; Klp61F; feo; mus101; RecQ4; aurB; fzy; Grip71; Blm; aurA; Tango9; pr-set7; Det; ncd; muskelin; Orc1; cmet
embryo	GO:0031570	4.39953e-05	24.1647	0.20037	4	89	DNA integrity checkpoint	0.000108522	6	mus101; RecQ4; pr-set7; dup
embryo	GO:0000819	6.67894e-05	21.6035	0.222883	4	99	sister chromatid segregation	0.00016258	6	CycB; aurB; Incenp; cmet
embryo	GO:0008608	7.29112e-05	238.558	0.0135081	2	6	attachment of spindle microtubules to kinetochore	0.000170741	6	CycB; aurB
embryo	GO:0032508	7.29112e-05	238.558	0.0135081	2	6	DNA duplex unwinding	0.000170741	6	RecQ4; Blm
embryo	GO:0043148	7.29112e-05	238.558	0.0135081	2	6	mitotic spindle stabilization	0.000170741	6	Klp61F; feo
embryo	GO:0051656	7.98327e-05	13.4069	0.457023	5	203	establishment of organelle localization	0.000184511	6	CycB; aurA; asp; Incenp; cmet
embryo	GO:0048856	8.17807e-05	4.55997	7.94725	18	3530	anatomical structure development	0.000184511	6	CycB; retn; Klp61F; feo; mus101; CG8188; RecQ4; CG31961; aurB; fzy; aurA; Det; asp; dup; muskelin; Orc1; Incenp; cmet
embryo	GO:0000212	8.17834e-05	42.4251	0.0855512	3	38	meiotic spindle organization	0.000184511	6	Grip71; ncd; Incenp
embryo	GO:0032392	0.000101933	190.831	0.0157594	2	7	DNA geometric change	0.000227201	6	RecQ4; Blm
embryo	GO:0007144	0.000135722	159.013	0.0180108	2	8	female meiosis I	0.000290472	6	fzy; Grip71
embryo	GO:0030261	0.000136122	35.3343	0.101311	3	45	chromosome condensation	0.000290472	6	aurB; pr-set7; Incenp
embryo	GO:0070507	0.000136122	35.3343	0.101311	3	45	regulation of microtubule cytoskeleton organization	0.000290472	6	Klp61F; feo; ncd
embryo	GO:0007018	0.0001366	17.8174	0.26791	4	119	microtubule-based movement	0.000290472	6	CycB; Klp61F; ncd; cmet
embryo	GO:0050789	0.000143256	4.29958	7.42494	17	3298	regulation of biological process	0.000301162	6	retn; Klp61F; feo; mus101; RecQ4; aurB; fzy; Grip71; Blm; aurA; Tango9; pr-set7; Det; ncd; muskelin; Orc1; cmet
embryo	GO:0051640	0.000146737	11.7189	0.520061	5	231	organelle localization	0.000305014	6	CycB; aurA; asp; Incenp; cmet
embryo	GO:0022412	0.000167469	5.71363	2.15904	9	959	cellular process involved in reproduction in multicellular organism	0.000344242	6	retn; feo; mus101; RecQ4; aurB; aurA; asp; dup; muskelin
embryo	GO:0048477	0.000182581	6.26255	1.69526	8	753	oogenesis	0.00037118	6	retn; feo; mus101; RecQ4; aurB; asp; dup; muskelin
embryo	GO:0031109	0.000186609	31.5626	0.112567	3	50	microtubule polymerization or depolymerization	0.000375246	6	Klp61F; feo; asp
embryo	GO:0051649	0.000192876	6.20932	1.70877	8	759	establishment of localization in cell	0.000383677	6	CycB; Klp61F; feo; aurA; Tango9; asp; Incenp; cmet
embryo	GO:0007292	0.000196413	6.19177	1.71327	8	761	female gamete generation	0.000386557	6	retn; feo; mus101; RecQ4; aurB; asp; dup; muskelin
embryo	GO:0051129	0.000203719	15.9909	0.297178	4	132	negative regulation of cellular component organization	0.000396715	6	Klp61F; feo; Tango9; pr-set7
embryo	GO:0000076	0.000217517	119.24	0.0225135	2	10	DNA replication checkpoint	0.000414852	6	mus101; dup
embryo	GO:0016572	0.000217517	119.24	0.0225135	2	10	histone phosphorylation	0.000414852	6	aurB; Incenp
embryo	GO:0003006	0.000221715	5.48772	2.24009	9	995	developmental process involved in reproduction	0.000414904	6	retn; feo; mus101; RecQ4; aurB; aurA; asp; dup; muskelin
embryo	GO:0032886	0.00022203	29.6616	0.119321	3	53	regulation of microtubule-based process	0.000414904	6	Klp61F; feo; ncd
embryo	GO:0018105	0.000265484	105.983	0.0247648	2	11	peptidyl-serine phosphorylation	0.000486283	6	aurB; aurA
embryo	GO:0018209	0.000265484	105.983	0.0247648	2	11	peptidyl-serine modification	0.000486283	6	aurB; aurA
embryo	GO:0007276	0.000287921	5.28337	2.31889	9	1030	gamete generation	0.000522209	6	retn; feo; mus101; RecQ4; aurB; aurA; asp; dup; muskelin
embryo	GO:0044767	0.000297985	4.00312	8.70596	18	3867	single-organism developmental process	0.000535217	6	CycB; retn; Klp61F; feo; mus101; CG8188; RecQ4; CG31961; aurB; fzy; aurA; Det; asp; dup; muskelin; Orc1; Incenp; cmet
embryo	GO:0048731	0.000316608	4.08566	5.52481	14	2454	system development	0.000560528	6	retn; Klp61F; feo; CG8188; CG31961; aurB; fzy; aurA; Det; asp; dup; Orc1; Incenp; cmet
embryo	GO:0034453	0.000318137	95.3769	0.0270162	2	12	microtubule anchoring	0.000560528	6	CycB; aurB
embryo	GO:0032502	0.00034627	3.94048	8.80051	18	3909	developmental process	0.00060434	6	CycB; retn; Klp61F; feo; mus101; CG8188; RecQ4; CG31961; aurB; fzy; aurA; Det; asp; dup; muskelin; Orc1; Incenp; cmet
embryo	GO:0006259	0.000370511	9.52127	0.63488	5	282	DNA metabolic process	0.000640602	6	Cdc6; RecQ4; Blm; dup; Orc1
embryo	GO:0007275	0.000378317	3.89426	7.16153	16	3181	multicellular organismal development	0.000648043	6	CycB; retn; Klp61F; feo; CG8188; RecQ4; CG31961; aurB; fzy; aurA; Det; asp; dup; Orc1; Incenp; cmet
embryo	GO:0006261	0.000406582	23.8974	0.146338	3	65	DNA-dependent DNA replication	0.00069007	6	Cdc6; dup; Orc1
embryo	GO:0006974	0.000448576	9.11689	0.661896	5	294	cellular response to DNA damage stimulus	0.000754424	6	CycB; mus101; RecQ4; Blm; pr-set7
embryo	GO:0044702	0.000490069	4.88452	2.48999	9	1106	single organism reproductive process	0.000816781	6	retn; feo; mus101; RecQ4; aurB; aurA; asp; dup; muskelin
embryo	GO:0010458	0.000504017	73.3491	0.0337702	2	15	exit from mitosis	0.000832527	6	CG8188; fzy
embryo	GO:0007281	0.000512432	5.31843	1.97218	8	876	germ cell development	0.000838937	6	retn; feo; mus101; RecQ4; aurB; asp; dup; muskelin
embryo	GO:0043146	0.000575217	68.1044	0.0360215	2	16	spindle stabilization	0.000933467	6	Klp61F; feo
embryo	GO:0045132	0.000595275	20.853	0.1666	3	74	meiotic chromosome segregation	0.000957616	6	Det; ncd; Incenp
embryo	GO:0051641	0.000637323	5.13356	2.03747	8	905	cellular localization	0.00101642	6	CycB; Klp61F; feo; aurA; Tango9; asp; Incenp; cmet
embryo	GO:0006270	0.000651006	63.559	0.0382729	2	17	DNA replication initiation	0.00102937	6	Cdc6; Orc1
embryo	GO:0048609	0.00072762	4.60226	2.62732	9	1167	multicellular organismal reproductive process	0.00112752	6	retn; feo; mus101; RecQ4; aurB; aurA; asp; dup; muskelin
embryo	GO:0048132	0.000731362	59.5817	0.0405242	2	18	female germ-line stem cell asymmetric division	0.00112752	6	aurB; asp
embryo	GO:0051310	0.000731362	59.5817	0.0405242	2	18	metaphase plate congression	0.00112752	6	Incenp; cmet
embryo	GO:0051294	0.000816268	56.0724	0.0427756	2	19	establishment of spindle orientation	0.00124801	6	aurA; asp
embryo	GO:0019953	0.00084409	4.4992	2.68135	9	1191	sexual reproduction	0.00127997	6	retn; feo; mus101; RecQ4; aurB; aurA; asp; dup; muskelin
embryo	GO:0000077	0.000922965	17.8207	0.193616	3	86	DNA damage checkpoint	0.0013882	6	mus101; RecQ4; pr-set7
embryo	GO:0044703	0.000935581	4.42869	2.71963	9	1208	multi-organism reproductive process	0.00139583	6	retn; feo; mus101; RecQ4; aurB; aurA; asp; dup; muskelin
embryo	GO:0007307	0.000999647	50.1619	0.0472783	2	21	eggshell chorion gene amplification	0.00146774	6	RecQ4; dup
embryo	GO:0098728	0.000999647	50.1619	0.0472783	2	21	germline stem cell asymmetric division	0.00146774	6	aurB; asp
embryo	GO:0000086	0.00101958	17.1949	0.20037	3	89	G2/M transition of mitotic cell cycle	0.00148521	6	CycB; mus101; RecQ4
embryo	GO:0000070	0.00112238	16.6112	0.207124	3	92	mitotic sister chromatid segregation	0.00160962	6	CycB; aurB; cmet
embryo	GO:0051302	0.00112238	16.6112	0.207124	3	92	regulation of cell division	0.00160962	6	aurB; fzy; ncd
embryo	GO:0044839	0.00119443	16.2435	0.211627	3	94	cell cycle G2/M phase transition	0.00169977	6	CycB; mus101; RecQ4
embryo	GO:0007026	0.00130835	43.3112	0.0540323	2	24	negative regulation of microtubule depolymerization	0.00184035	6	Klp61F; feo
embryo	GO:0009987	0.00131312	5.1594	17.3106	25	7689	cellular process	0.00184035	6	CycB; retn; Klp61F; feo; mus101; CG11674; CG8188; Cdc6; RecQ4; CG31961; aurB; fzy; Grip71; Blm; aurA; Tango9; pr-set7; Det; asp; ncd; dup; muskelin; Orc1; Incenp; cmet
embryo	GO:0008356	0.00134716	15.5545	0.220632	3	98	asymmetric cell division	0.00187387	6	aurB; asp; Incenp
embryo	GO:0022414	0.00136417	4.17659	2.86596	9	1273	reproductive process	0.00188337	6	retn; feo; mus101; RecQ4; aurB; aurA; asp; dup; muskelin
embryo	GO:0031111	0.00142014	41.4247	0.0562837	2	25	negative regulation of microtubule polymerization or depolymerization	0.00194612	6	Klp61F; feo
embryo	GO:0060548	0.00146943	15.0747	0.227386	3	101	negative regulation of cell death	0.00199886	6	fzy; Tango9; Det
embryo	GO:0031114	0.00165695	38.1046	0.0607864	2	27	regulation of microtubule depolymerization	0.00223748	6	Klp61F; feo
embryo	GO:0043242	0.00178192	36.6361	0.0630377	2	28	negative regulation of protein complex disassembly	0.00232152	6	Klp61F; feo
embryo	GO:0044786	0.00178192	36.6361	0.0630377	2	28	cell cycle DNA replication	0.00232152	6	Cdc6; dup
embryo	GO:0051293	0.00178192	36.6361	0.0630377	2	28	establishment of spindle localization	0.00232152	6	aurA; asp
embryo	GO:0051653	0.00178192	36.6361	0.0630377	2	28	spindle localization	0.00232152	6	aurA; asp
embryo	GO:1901880	0.00178192	36.6361	0.0630377	2	28	negative regulation of protein depolymerization	0.00232152	6	Klp61F; feo
embryo	GO:0032501	0.0017993	3.27756	9.9442	18	4417	multicellular organismal process	0.00232776	6	CycB; retn; Klp61F; feo; mus101; CG8188; RecQ4; CG31961; aurB; fzy; aurA; Det; asp; dup; muskelin; Orc1; Incenp; cmet
embryo	GO:0051493	0.00182896	13.9279	0.245397	3	109	regulation of cytoskeleton organization	0.00234971	6	Klp61F; feo; ncd
embryo	GO:0090068	0.00191126	35.2764	0.0652891	2	29	positive regulation of cell cycle process	0.0024385	6	RecQ4; aurB
embryo	GO:0007019	0.00204493	34.0137	0.0675404	2	30	microtubule depolymerization	0.00259118	6	Klp61F; feo
embryo	GO:1901879	0.00218292	32.8382	0.0697918	2	31	regulation of protein depolymerization	0.00274722	6	Klp61F; feo
embryo	GO:0032504	0.00225718	3.8547	3.07759	9	1367	multicellular organism reproduction	0.00282148	6	retn; feo; mus101; RecQ4; aurB; aurA; asp; dup; muskelin
embryo	GO:0043244	0.00232522	31.741	0.0720431	2	32	regulation of protein complex disassembly	0.00288702	6	Klp61F; feo
embryo	GO:1902580	0.00243188	6.14489	0.965828	5	429	single-organism cellular localization	0.00299932	6	CycB; feo; aurA; asp; cmet
embryo	GO:0031110	0.00247179	30.7146	0.0742944	2	33	regulation of microtubule polymerization or depolymerization	0.00302836	6	Klp61F; feo
embryo	GO:0001578	0.00262263	29.7524	0.0765458	2	34	microtubule bundle formation	0.00319202	6	Klp61F; ncd
embryo	GO:0051128	0.00301568	4.902	1.48589	6	660	regulation of cellular component organization	0.00364641	6	Klp61F; feo; fzy; Tango9; pr-set7; ncd
embryo	GO:0006323	0.00315322	11.4233	0.297178	3	132	DNA packaging	0.00378796	6	aurB; pr-set7; Incenp
embryo	GO:0051234	0.00332038	3.42935	3.91734	10	1740	establishment of localization	0.00396304	6	CycB; Klp61F; feo; fzy; aurA; Tango9; asp; ncd; Incenp; cmet
embryo	GO:0044707	0.00334794	3.00927	8.61365	16	3826	single-multicellular organism process	0.00397031	6	CycB; retn; Klp61F; feo; CG8188; RecQ4; CG31961; aurB; fzy; aurA; Det; asp; dup; Orc1; Incenp; cmet
embryo	GO:0051494	0.00344014	25.7214	0.0878025	2	39	negative regulation of cytoskeleton organization	0.00405367	6	Klp61F; feo
embryo	GO:0045786	0.00357432	10.9102	0.310686	3	138	negative regulation of cell cycle	0.0041812	6	mus101; RecQ4; fzy
embryo	GO:0031145	0.00361617	25.0425	0.0900539	2	40	anaphase-promoting complex-dependent proteasomal ubiquitin-dependent protein catabolic process	0.0041812	6	CG8188; fzy
embryo	GO:0032506	0.00361617	25.0425	0.0900539	2	40	cytokinetic process	0.0041812	6	feo; Det
embryo	GO:0044699	0.00390017	3.89817	16.9887	24	7546	single-organism process	0.00445623	6	CycB; retn; Klp61F; feo; mus101; CG8188; Cdc6; RecQ4; CG31961; aurB; fzy; Grip71; Blm; aurA; Tango9; pr-set7; Det; asp; ncd; dup; muskelin; Orc1; Incenp; cmet
embryo	GO:0033036	0.00392654	4.63202	1.56694	6	696	macromolecule localization	0.00445623	6	Klp61F; feo; aurA; Tango9; ncd; Incenp
embryo	GO:1901987	0.00395038	10.5163	0.321943	3	143	regulation of cell cycle phase transition	0.00445623	6	mus101; RecQ4; fzy
embryo	GO:1901990	0.00395038	10.5163	0.321943	3	143	regulation of mitotic cell cycle phase transition	0.00445623	6	mus101; RecQ4; fzy
embryo	GO:0051261	0.00398063	23.7865	0.0945566	2	42	protein depolymerization	0.00446313	6	Klp61F; feo
embryo	GO:0030010	0.00416901	23.2045	0.0968079	2	43	establishment of cell polarity	0.00461837	6	aurA; asp
embryo	GO:0042078	0.00416901	23.2045	0.0968079	2	43	germ-line stem cell division	0.00461837	6	aurB; asp
embryo	GO:0016569	0.00477301	9.8072	0.344456	3	153	covalent chromatin modification	0.00522489	6	aurB; pr-set7; Incenp
embryo	GO:0016570	0.00477301	9.8072	0.344456	3	153	histone modification	0.00522489	6	aurB; pr-set7; Incenp
embryo	GO:0006302	0.00496318	21.135	0.105813	2	47	double-strand break repair	0.00540111	6	RecQ4; Blm
embryo	GO:0051704	0.00506385	3.37062	3.46257	9	1538	multi-organism process	0.00547843	6	retn; feo; mus101; RecQ4; aurB; aurA; asp; dup; muskelin
embryo	GO:0045787	0.00538439	20.2324	0.110316	2	49	positive regulation of cell cycle	0.00575787	6	RecQ4; aurB
embryo	GO:0051052	0.00538439	20.2324	0.110316	2	49	regulation of DNA metabolic process	0.00575787	6	RecQ4; Blm
embryo	GO:0008104	0.00563552	5.00042	1.1752	5	522	protein localization	0.00599179	6	Klp61F; feo; aurA; Tango9; Incenp
embryo	GO:0009306	0.00582149	19.4035	0.114819	2	51	protein secretion	0.00615415	6	Klp61F; Tango9
embryo	GO:0043624	0.00604596	19.0138	0.11707	2	52	cellular protein complex disassembly	0.00635513	6	Klp61F; feo
embryo	GO:0043241	0.00627435	18.6395	0.119321	2	53	protein complex disassembly	0.00653922	6	Klp61F; feo
embryo	GO:0060341	0.00629179	8.85036	0.380478	3	169	regulation of cellular localization	0.00653922	6	feo; aurA; Tango9
embryo	GO:0032984	0.00698287	17.5997	0.126075	2	56	macromolecular complex disassembly	0.00717684	6	Klp61F; feo
embryo	GO:1903827	0.00698287	17.5997	0.126075	2	56	regulation of cellular protein localization	0.00717684	6	feo; aurA
embryo	GO:0008284	0.0074745	16.9684	0.130578	2	58	positive regulation of cell proliferation	0.00763968	6	RecQ4; Tango9
embryo	GO:0098722	0.00824053	16.1017	0.137332	2	61	asymmetric stem cell division	0.00837636	6	aurB; asp
embryo	GO:0048468	0.0083897	3.08655	3.73724	9	1660	cell development	0.00848139	6	retn; feo; mus101; RecQ4; aurB; aurA; asp; dup; muskelin
embryo	GO:0031324	0.00892299	4.44975	1.31254	5	583	negative regulation of cellular metabolic process	0.00897149	6	retn; fzy; Blm; pr-set7; Orc1
embryo	GO:0033554	0.00911303	4.42565	1.31929	5	586	cellular response to stress	0.00911303	6	CycB; mus101; RecQ4; Blm; pr-set7
embryo	GO:0007049	3.9621e-19	15.1769	4.09327	29	979	cell cycle	1.22825e-16	7	Klp3A; Cdk7; CG12018; Grip91; Grip84; Msh6; Cdc27; DNApol-epsilon58; mad2; DNApol-alpha60; aub; mre11; dgt2; spel1; nesd; lds; Cdc16; DNApol-epsilon255; ball; Cul5; Cap-D2; Zwilch; rod; BubR1; SMC2; cnn; lat; dgt5; Orc6
embryo	GO:0022402	1.96152e-17	14.328	3.48701	26	834	cell cycle process	3.04036e-15	7	Klp3A; Cdk7; CG12018; Grip91; Grip84; Msh6; Cdc27; DNApol-epsilon58; mad2; aub; mre11; dgt2; spel1; nesd; lds; Cdc16; ball; Cap-D2; Zwilch; rod; BubR1; SMC2; cnn; lat; dgt5; Orc6
embryo	GO:0000280	1.87215e-16	16.8745	2.08636	21	499	nuclear division	1.93456e-14	7	Klp3A; Cdk7; Grip91; Grip84; Msh6; Cdc27; mad2; aub; spel1; nesd; lds; Cdc16; ball; Cap-D2; Zwilch; rod; BubR1; SMC2; cnn; dgt5; Orc6
embryo	GO:0048285	3.27183e-16	16.3751	2.14489	21	513	organelle fission	2.53567e-14	7	Klp3A; Cdk7; Grip91; Grip84; Msh6; Cdc27; mad2; aub; spel1; nesd; lds; Cdc16; ball; Cap-D2; Zwilch; rod; BubR1; SMC2; cnn; dgt5; Orc6
embryo	GO:0000278	1.38572e-15	14.2293	2.62989	22	629	mitotic cell cycle	8.59149e-14	7	Klp3A; Cdk7; CG12018; Grip91; Grip84; Cdc27; mad2; DNApol-alpha60; aub; mre11; dgt2; spel1; Cdc16; DNApol-epsilon255; Cap-D2; Zwilch; rod; BubR1; SMC2; cnn; dgt5; Orc6
embryo	GO:0006259	1.59065e-14	20.249	1.17906	16	282	DNA metabolic process	8.08802e-13	7	Klp3A; CG2990; Orc4; CG12018; Msh6; DNApol-epsilon58; gkt; DNApol-alpha60; piwi; mre11; spel1; DNApol-alpha180; DNApol-epsilon255; lat; Orc6; DNApol-alpha73
embryo	GO:1903047	1.82633e-14	14.0353	2.29123	20	548	mitotic cell cycle process	8.08802e-13	7	Klp3A; Cdk7; CG12018; Grip91; Grip84; Cdc27; mad2; aub; mre11; dgt2; spel1; Cdc16; Cap-D2; Zwilch; rod; BubR1; SMC2; cnn; dgt5; Orc6
embryo	GO:0016043	7.06931e-14	8.72369	11.569	37	2767	cellular component organization	2.73936e-12	7	fs(1)N; Klp3A; Cdk7; fs(1)M3; CG12018; Chrac-16; Grip91; yl; Grip84; Msh6; Cdc27; ndl; mad2; Bre1; aub; piwi; mre11; dgt2; spel1; nesd; lds; Cdc16; polybromo; ball; Cul5; Cap-D2; Zwilch; rod; Acf1; BubR1; SMC2; cnn; lat; dgt5; Orc6; l(1)G0222; clos
embryo	GO:0071840	1.54041e-13	8.45954	11.845	37	2833	cellular component organization or biogenesis	5.30584e-12	7	fs(1)N; Klp3A; Cdk7; fs(1)M3; CG12018; Chrac-16; Grip91; yl; Grip84; Msh6; Cdc27; ndl; mad2; Bre1; aub; piwi; mre11; dgt2; spel1; nesd; lds; Cdc16; polybromo; ball; Cul5; Cap-D2; Zwilch; rod; Acf1; BubR1; SMC2; cnn; lat; dgt5; Orc6; l(1)G0222; clos
embryo	GO:0006996	8.42596e-13	8.02415	7.64718	30	1829	organelle organization	2.61205e-11	7	Klp3A; Cdk7; CG12018; Chrac-16; Grip91; Grip84; Msh6; Cdc27; mad2; Bre1; aub; piwi; mre11; dgt2; spel1; nesd; lds; Cdc16; polybromo; ball; Cap-D2; Zwilch; rod; Acf1; BubR1; SMC2; cnn; lat; dgt5; Orc6
embryo	GO:1902589	1.40222e-12	8.50499	5.55665	26	1329	single-organism organelle organization	3.9517e-11	7	Klp3A; Cdk7; CG12018; Grip91; Grip84; Msh6; Cdc27; mad2; Bre1; aub; mre11; dgt2; spel1; nesd; lds; Cdc16; ball; Cap-D2; Zwilch; rod; BubR1; SMC2; cnn; lat; dgt5; Orc6
embryo	GO:0007067	2.30236e-12	17.8832	1.1038	14	264	mitotic nuclear division	5.94775e-11	7	Klp3A; Cdk7; Grip84; Cdc27; mad2; aub; Cdc16; Cap-D2; Zwilch; rod; BubR1; SMC2; dgt5; Orc6
embryo	GO:0006261	5.04754e-12	46.0801	0.27177	9	65	DNA-dependent DNA replication	1.12029e-10	7	CG2990; Orc4; DNApol-epsilon58; DNApol-alpha60; DNApol-alpha180; DNApol-epsilon255; lat; Orc6; DNApol-alpha73
embryo	GO:0006260	5.05936e-12	34.4538	0.397202	10	95	DNA replication	1.12029e-10	7	CG2990; Orc4; CG12018; DNApol-epsilon58; DNApol-alpha60; DNApol-alpha180; DNApol-epsilon255; lat; Orc6; DNApol-alpha73
embryo	GO:0051726	8.36664e-12	14.4056	1.4801	15	354	regulation of cell cycle	1.72911e-10	7	Klp3A; Cdk7; Grip91; Grip84; Cdc27; DNApol-epsilon58; mad2; mre11; spel1; Cdc16; Cul5; Zwilch; rod; BubR1; dgt5
embryo	GO:0051276	9.5967e-11	10.1425	2.43757	17	583	chromosome organization	1.85936e-09	7	Chrac-16; Msh6; mad2; Bre1; aub; piwi; mre11; spel1; Cdc16; polybromo; ball; Cap-D2; Zwilch; rod; Acf1; BubR1; SMC2
embryo	GO:0009987	4.30615e-10	31.6964	32.1483	51	7689	cellular process	7.8524e-09	7	fs(1)N; Klp3A; Cdk7; fs(1)M3; CG2990; Psf3; Orc4; CG12018; Chrac-16; Grip91; yl; CG12398; CG8173; Grip84; Msh6; Cdc27; ndl; DNApol-epsilon58; mad2; Bre1; gkt; CG13690; DNApol-alpha60; aub; piwi; mre11; dgt2; spel1; nesd; lds; DNApol-alpha180; Cdc16; DNApol-epsilon255; polybromo; ball; Cul5; Cap-D2; Zwilch; rod; Acf1; BubR1; hrg; SMC2; cnn; lat; dgt5; Orc6; DNApol-alpha73; wech; l(1)G0222; clos
embryo	GO:0090304	5.7403e-10	6.26393	7.23744	26	1731	nucleic acid metabolic process	9.18417e-09	7	Klp3A; Cdk7; CG2990; Orc4; CG12018; Msh6; Cdc27; DNApol-epsilon58; gkt; CG13690; DNApol-alpha60; aub; piwi; mre11; spel1; lds; DNApol-alpha180; DNApol-epsilon255; polybromo; Acf1; BubR1; hrg; lat; Orc6; DNApol-alpha73; clos
embryo	GO:0051783	5.81711e-10	34.4615	0.305218	8	73	regulation of nuclear division	9.18417e-09	7	Klp3A; mad2; spel1; Cdc16; Zwilch; rod; BubR1; dgt5
embryo	GO:0010564	5.92527e-10	16.9483	0.852939	11	204	regulation of cell cycle process	9.18417e-09	7	Klp3A; Grip91; DNApol-epsilon58; mad2; mre11; spel1; Cdc16; Zwilch; rod; BubR1; dgt5
embryo	GO:0098813	7.73418e-10	19.8218	0.656428	10	157	nuclear chromosome segregation	1.14171e-08	7	Klp3A; mad2; aub; Cdc16; Cap-D2; Zwilch; rod; BubR1; SMC2; cnn
embryo	GO:0007052	1.38614e-09	15.5546	0.924017	11	221	mitotic spindle organization	1.9532e-08	7	Klp3A; CG12018; Grip91; Grip84; mad2; dgt2; Cap-D2; BubR1; SMC2; cnn; dgt5
embryo	GO:0033043	1.99864e-09	12.9696	1.22087	12	292	regulation of organelle organization	2.69382e-08	7	Klp3A; Grip91; mad2; spel1; Cdc16; polybromo; Zwilch; rod; Acf1; BubR1; cnn; dgt5
embryo	GO:0007059	2.63398e-09	17.3143	0.744231	10	178	chromosome segregation	3.40223e-08	7	Klp3A; mad2; aub; Cdc16; Cap-D2; Zwilch; rod; BubR1; SMC2; cnn
embryo	GO:0000070	3.79342e-09	26.6255	0.384659	8	92	mitotic sister chromatid segregation	4.52293e-08	7	mad2; aub; Cdc16; Cap-D2; Zwilch; rod; BubR1; SMC2
embryo	GO:0051302	3.79342e-09	26.6255	0.384659	8	92	regulation of cell division	4.52293e-08	7	Klp3A; mad2; spel1; Cdc16; Zwilch; rod; BubR1; dgt5
embryo	GO:0051301	4.70982e-09	11.9624	1.31704	12	315	cell division	5.40757e-08	7	Klp3A; mad2; aub; piwi; spel1; nesd; Cdc16; Zwilch; rod; BubR1; cnn; dgt5
embryo	GO:0006270	6.2497e-09	109.69	0.0710782	5	17	DNA replication initiation	6.91932e-08	7	Orc4; DNApol-alpha180; lat; Orc6; DNApol-alpha73
embryo	GO:0000819	6.82446e-09	24.5634	0.413926	8	99	sister chromatid segregation	7.28223e-08	7	mad2; aub; Cdc16; Cap-D2; Zwilch; rod; BubR1; SMC2
embryo	GO:0007051	7.04732e-09	13.1844	1.07872	11	258	spindle organization	7.28223e-08	7	Klp3A; CG12018; Grip91; Grip84; mad2; dgt2; Cap-D2; BubR1; SMC2; cnn; dgt5
embryo	GO:0007088	1.30034e-08	30.9179	0.288494	7	69	regulation of mitotic nuclear division	1.30034e-07	7	Klp3A; mad2; Cdc16; Zwilch; rod; BubR1; dgt5
embryo	GO:0051782	1.55111e-08	87.7305	0.0836215	5	20	negative regulation of cell division	1.4571e-07	7	mad2; spel1; Zwilch; rod; BubR1
embryo	GO:0051784	1.55111e-08	87.7305	0.0836215	5	20	negative regulation of nuclear division	1.4571e-07	7	mad2; spel1; Zwilch; rod; BubR1
embryo	GO:0000226	1.60871e-08	9.54306	1.80204	13	431	microtubule cytoskeleton organization	1.46677e-07	7	Klp3A; CG12018; Grip91; Grip84; mad2; dgt2; lds; Cap-D2; BubR1; SMC2; cnn; lat; dgt5
embryo	GO:0006139	2.11545e-08	5.14031	8.54193	26	2043	nucleobase-containing compound metabolic process	1.87368e-07	7	Klp3A; Cdk7; CG2990; Orc4; CG12018; Msh6; Cdc27; DNApol-epsilon58; gkt; CG13690; DNApol-alpha60; aub; piwi; mre11; spel1; lds; DNApol-alpha180; DNApol-epsilon255; polybromo; Acf1; BubR1; hrg; lat; Orc6; DNApol-alpha73; clos
embryo	GO:1901360	3.10712e-08	4.95601	9.37815	27	2243	organic cyclic compound metabolic process	2.67558e-07	7	Klp3A; Cdk7; CG2990; Orc4; CG12018; CG12398; Msh6; Cdc27; DNApol-epsilon58; gkt; CG13690; DNApol-alpha60; aub; piwi; mre11; spel1; lds; DNApol-alpha180; DNApol-epsilon255; polybromo; Acf1; BubR1; hrg; lat; Orc6; DNApol-alpha73; clos
embryo	GO:0010639	3.69724e-08	26.2356	0.334486	7	80	negative regulation of organelle organization	3.09769e-07	7	Grip91; mad2; spel1; polybromo; Zwilch; rod; BubR1
embryo	GO:0046483	5.3247e-08	4.87524	8.92241	26	2134	heterocycle metabolic process	4.34384e-07	7	Klp3A; Cdk7; CG2990; Orc4; CG12018; Msh6; Cdc27; DNApol-epsilon58; gkt; CG13690; DNApol-alpha60; aub; piwi; mre11; spel1; lds; DNApol-alpha180; DNApol-epsilon255; polybromo; Acf1; BubR1; hrg; lat; Orc6; DNApol-alpha73; clos
embryo	GO:0043933	6.07721e-08	6.08023	4.22288	18	1010	macromolecular complex subunit organization	4.8306e-07	7	Klp3A; CG12018; Chrac-16; Grip91; Grip84; mad2; Bre1; aub; piwi; dgt2; polybromo; ball; Cap-D2; Acf1; BubR1; SMC2; cnn; dgt5
embryo	GO:0007010	6.24459e-08	7.19058	2.82641	15	676	cytoskeleton organization	4.83956e-07	7	Klp3A; CG12018; Grip91; Grip84; mad2; dgt2; nesd; lds; Cap-D2; BubR1; SMC2; cnn; lat; dgt5; Orc6
embryo	GO:0044763	6.52129e-08	5.57435	24.0788	43	5759	single-organism cellular process	4.93073e-07	7	fs(1)N; Klp3A; Cdk7; fs(1)M3; Psf3; CG12018; Grip91; yl; CG12398; Grip84; Msh6; Cdc27; ndl; DNApol-epsilon58; mad2; Bre1; gkt; DNApol-alpha60; aub; piwi; mre11; dgt2; spel1; nesd; lds; DNApol-alpha180; Cdc16; DNApol-epsilon255; polybromo; ball; Cul5; Cap-D2; Zwilch; rod; Acf1; BubR1; SMC2; cnn; lat; dgt5; Orc6; l(1)G0222; clos
embryo	GO:0044260	7.07114e-08	4.6004	15.2149	34	3639	cellular macromolecule metabolic process	5.21917e-07	7	Klp3A; Cdk7; CG2990; Orc4; CG12018; CG8173; Msh6; Cdc27; DNApol-epsilon58; mad2; Bre1; gkt; CG13690; DNApol-alpha60; aub; piwi; mre11; spel1; lds; DNApol-alpha180; Cdc16; DNApol-epsilon255; polybromo; ball; Cul5; Zwilch; rod; Acf1; BubR1; hrg; lat; Orc6; DNApol-alpha73; clos
embryo	GO:0006725	7.5657e-08	4.77659	9.07293	26	2170	cellular aromatic compound metabolic process	5.45434e-07	7	Klp3A; Cdk7; CG2990; Orc4; CG12018; Msh6; Cdc27; DNApol-epsilon58; gkt; CG13690; DNApol-alpha60; aub; piwi; mre11; spel1; lds; DNApol-alpha180; DNApol-epsilon255; polybromo; Acf1; BubR1; hrg; lat; Orc6; DNApol-alpha73; clos
embryo	GO:0030071	1.15484e-07	54.7917	0.121251	5	29	regulation of mitotic metaphase/anaphase transition	7.95558e-07	7	mad2; Cdc16; Zwilch; rod; BubR1
embryo	GO:1902099	1.15484e-07	54.7917	0.121251	5	29	regulation of metaphase/anaphase transition of cell cycle	7.95558e-07	7	mad2; Cdc16; Zwilch; rod; BubR1
embryo	GO:0007126	1.59942e-07	10.9316	1.14561	10	274	meiotic nuclear division	1.07787e-06	7	Klp3A; Grip91; Grip84; Msh6; spel1; nesd; lds; ball; BubR1; cnn
embryo	GO:1903046	1.89253e-07	10.724	1.16652	10	279	meiotic cell cycle process	1.22726e-06	7	Klp3A; Grip91; Grip84; Msh6; spel1; nesd; lds; ball; BubR1; cnn
embryo	GO:0051306	1.93986e-07	48.6919	0.133794	5	32	mitotic sister chromatid separation	1.22726e-06	7	mad2; Cdc16; Zwilch; rod; BubR1
embryo	GO:2001251	1.93986e-07	48.6919	0.133794	5	32	negative regulation of chromosome organization	1.22726e-06	7	mad2; polybromo; Zwilch; rod; BubR1
embryo	GO:0051321	2.09023e-07	10.6031	1.17906	10	282	meiotic cell cycle	1.29594e-06	7	Klp3A; Grip91; Grip84; Msh6; spel1; nesd; lds; ball; BubR1; cnn
embryo	GO:0007017	2.25655e-07	7.50032	2.25778	13	540	microtubule-based process	1.33304e-06	7	Klp3A; CG12018; Grip91; Grip84; mad2; dgt2; lds; Cap-D2; BubR1; SMC2; cnn; lat; dgt5
embryo	GO:0007091	2.27906e-07	46.9491	0.137975	5	33	metaphase/anaphase transition of mitotic cell cycle	1.33304e-06	7	mad2; Cdc16; Zwilch; rod; BubR1
embryo	GO:0044784	2.27906e-07	46.9491	0.137975	5	33	metaphase/anaphase transition of cell cycle	1.33304e-06	7	mad2; Cdc16; Zwilch; rod; BubR1
embryo	GO:0007094	2.63688e-07	103.125	0.058535	4	14	mitotic spindle assembly checkpoint	1.35363e-06	7	mad2; Zwilch; rod; BubR1
embryo	GO:0071173	2.63688e-07	103.125	0.058535	4	14	spindle assembly checkpoint	1.35363e-06	7	mad2; Zwilch; rod; BubR1
embryo	GO:0071174	2.63688e-07	103.125	0.058535	4	14	mitotic spindle checkpoint	1.35363e-06	7	mad2; Zwilch; rod; BubR1
embryo	GO:1904666	2.63688e-07	103.125	0.058535	4	14	regulation of ubiquitin protein ligase activity	1.35363e-06	7	mad2; Zwilch; rod; BubR1
embryo	GO:1904667	2.63688e-07	103.125	0.058535	4	14	negative regulation of ubiquitin protein ligase activity	1.35363e-06	7	mad2; Zwilch; rod; BubR1
embryo	GO:0010965	2.66359e-07	45.3265	0.142156	5	34	regulation of mitotic sister chromatid separation	1.35363e-06	7	mad2; Cdc16; Zwilch; rod; BubR1
embryo	GO:0033045	2.66359e-07	45.3265	0.142156	5	34	regulation of sister chromatid segregation	1.35363e-06	7	mad2; Cdc16; Zwilch; rod; BubR1
embryo	GO:0033047	2.66359e-07	45.3265	0.142156	5	34	regulation of mitotic sister chromatid segregation	1.35363e-06	7	mad2; Cdc16; Zwilch; rod; BubR1
embryo	GO:0033044	2.78531e-07	19.11	0.447375	7	107	regulation of chromosome organization	1.39266e-06	7	mad2; Cdc16; polybromo; Zwilch; rod; Acf1; BubR1
embryo	GO:0007346	2.95564e-07	11.9607	0.928198	9	222	regulation of mitotic cell cycle	1.45436e-06	7	Klp3A; mad2; mre11; spel1; Cdc16; Zwilch; rod; BubR1; dgt5
embryo	GO:0051128	3.30977e-07	6.69488	2.75951	14	660	regulation of cellular component organization	1.52225e-06	7	Klp3A; Grip91; mad2; aub; spel1; Cdc16; polybromo; Cul5; Zwilch; rod; Acf1; BubR1; cnn; dgt5
embryo	GO:0007305	3.58465e-07	93.7424	0.0627161	4	15	vitelline membrane formation involved in chorion-containing eggshell formation	1.52225e-06	7	fs(1)N; fs(1)M3; polybromo; clos
embryo	GO:0030704	3.58465e-07	93.7424	0.0627161	4	15	vitelline membrane formation	1.52225e-06	7	fs(1)N; fs(1)M3; polybromo; clos
embryo	GO:0031577	3.58465e-07	93.7424	0.0627161	4	15	spindle checkpoint	1.52225e-06	7	mad2; Zwilch; rod; BubR1
embryo	GO:0033046	3.58465e-07	93.7424	0.0627161	4	15	negative regulation of sister chromatid segregation	1.52225e-06	7	mad2; Zwilch; rod; BubR1
embryo	GO:0033048	3.58465e-07	93.7424	0.0627161	4	15	negative regulation of mitotic sister chromatid segregation	1.52225e-06	7	mad2; Zwilch; rod; BubR1
embryo	GO:0035803	3.58465e-07	93.7424	0.0627161	4	15	egg coat formation	1.52225e-06	7	fs(1)N; fs(1)M3; polybromo; clos
embryo	GO:0045841	3.58465e-07	93.7424	0.0627161	4	15	negative regulation of mitotic metaphase/anaphase transition	1.52225e-06	7	mad2; Zwilch; rod; BubR1
embryo	GO:1902100	3.58465e-07	93.7424	0.0627161	4	15	negative regulation of metaphase/anaphase transition of cell cycle	1.52225e-06	7	mad2; Zwilch; rod; BubR1
embryo	GO:2000816	3.58465e-07	93.7424	0.0627161	4	15	negative regulation of mitotic sister chromatid separation	1.52225e-06	7	mad2; Zwilch; rod; BubR1
embryo	GO:0051983	4.13331e-07	41.0672	0.1547	5	37	regulation of chromosome segregation	1.73152e-06	7	mad2; Cdc16; Zwilch; rod; BubR1
embryo	GO:0051352	4.76478e-07	85.9236	0.0668972	4	16	negative regulation of ligase activity	1.86972e-06	7	mad2; Zwilch; rod; BubR1
embryo	GO:0051436	4.76478e-07	85.9236	0.0668972	4	16	negative regulation of ubiquitin-protein ligase activity involved in mitotic cell cycle	1.86972e-06	7	mad2; Zwilch; rod; BubR1
embryo	GO:0051439	4.76478e-07	85.9236	0.0668972	4	16	regulation of ubiquitin-protein ligase activity involved in mitotic cell cycle	1.86972e-06	7	mad2; Zwilch; rod; BubR1
embryo	GO:0051444	4.76478e-07	85.9236	0.0668972	4	16	negative regulation of ubiquitin-protein transferase activity	1.86972e-06	7	mad2; Zwilch; rod; BubR1
embryo	GO:0051985	4.76478e-07	85.9236	0.0668972	4	16	negative regulation of chromosome segregation	1.86972e-06	7	mad2; Zwilch; rod; BubR1
embryo	GO:0031145	6.1807e-07	37.538	0.167243	5	40	anaphase-promoting complex-dependent proteasomal ubiquitin-dependent protein catabolic process	2.39502e-06	7	mad2; Cdc16; Zwilch; rod; BubR1
embryo	GO:0032434	7.01697e-07	36.4923	0.171424	5	41	regulation of proteasomal ubiquitin-dependent protein catabolic process	2.68551e-06	7	mad2; Cdc16; Zwilch; rod; BubR1
embryo	GO:0031397	7.96174e-07	73.6369	0.0752593	4	18	negative regulation of protein ubiquitination	2.97366e-06	7	mad2; Zwilch; rod; BubR1
embryo	GO:0045839	7.96174e-07	73.6369	0.0752593	4	18	negative regulation of mitotic nuclear division	2.97366e-06	7	mad2; Zwilch; rod; BubR1
embryo	GO:0061136	8.95661e-07	34.5661	0.179786	5	43	regulation of proteasomal protein catabolic process	3.30541e-06	7	mad2; Cdc16; Zwilch; rod; BubR1
embryo	GO:0051340	1.00537e-06	68.7222	0.0794404	4	19	regulation of ligase activity	3.58926e-06	7	mad2; Zwilch; rod; BubR1
embryo	GO:1903321	1.00537e-06	68.7222	0.0794404	4	19	negative regulation of protein modification by small protein conjugation or removal	3.58926e-06	7	mad2; Zwilch; rod; BubR1
embryo	GO:0051304	1.00731e-06	33.677	0.183967	5	44	chromosome separation	3.58926e-06	7	mad2; Cdc16; Zwilch; rod; BubR1
embryo	GO:0031329	1.10449e-06	15.3812	0.547721	7	131	regulation of cellular catabolic process	3.89082e-06	7	mad2; aub; piwi; Cdc16; Zwilch; rod; BubR1
embryo	GO:0051129	1.16264e-06	15.2569	0.551902	7	132	negative regulation of cellular component organization	4.04964e-06	7	Grip91; mad2; spel1; polybromo; Zwilch; rod; BubR1
embryo	GO:0032435	1.25284e-06	64.4219	0.0836215	4	20	negative regulation of proteasomal ubiquitin-dependent protein catabolic process	4.21143e-06	7	mad2; Zwilch; rod; BubR1
embryo	GO:0085029	1.25284e-06	64.4219	0.0836215	4	20	extracellular matrix assembly	4.21143e-06	7	fs(1)N; fs(1)M3; polybromo; clos
embryo	GO:1901799	1.25284e-06	64.4219	0.0836215	4	20	negative regulation of proteasomal protein catabolic process	4.21143e-06	7	mad2; Zwilch; rod; BubR1
embryo	GO:0051348	1.26343e-06	32.0291	0.192329	5	46	negative regulation of transferase activity	4.21143e-06	7	Cdc27; mad2; Zwilch; rod; BubR1
embryo	GO:0043170	1.32205e-06	3.94224	17.9117	35	4284	macromolecule metabolic process	4.35997e-06	7	Klp3A; Cdk7; CG2990; Orc4; CG12018; CG8173; Msh6; Cdc27; ndl; DNApol-epsilon58; mad2; Bre1; gkt; CG13690; DNApol-alpha60; aub; piwi; mre11; spel1; lds; DNApol-alpha180; Cdc16; DNApol-epsilon255; polybromo; ball; Cul5; Zwilch; rod; Acf1; BubR1; hrg; lat; Orc6; DNApol-alpha73; clos
embryo	GO:1903050	1.40939e-06	31.2639	0.19651	5	47	regulation of proteolysis involved in cellular protein catabolic process	4.55114e-06	7	mad2; Cdc16; Zwilch; rod; BubR1
embryo	GO:1903362	1.40939e-06	31.2639	0.19651	5	47	regulation of cellular protein catabolic process	4.55114e-06	7	mad2; Cdc16; Zwilch; rod; BubR1
embryo	GO:0042177	1.54285e-06	60.6275	0.0878025	4	21	negative regulation of protein catabolic process	4.83115e-06	7	mad2; Zwilch; rod; BubR1
embryo	GO:1903051	1.54285e-06	60.6275	0.0878025	4	21	negative regulation of proteolysis involved in cellular protein catabolic process	4.83115e-06	7	mad2; Zwilch; rod; BubR1
embryo	GO:1903363	1.54285e-06	60.6275	0.0878025	4	21	negative regulation of cellular protein catabolic process	4.83115e-06	7	mad2; Zwilch; rod; BubR1
embryo	GO:0045786	1.56819e-06	14.551	0.576988	7	138	negative regulation of cell cycle	4.86138e-06	7	Cdc27; mad2; mre11; spel1; Zwilch; rod; BubR1
embryo	GO:0051438	1.87989e-06	57.2546	0.0919836	4	22	regulation of ubiquitin-protein transferase activity	5.76996e-06	7	mad2; Zwilch; rod; BubR1
embryo	GO:0071822	2.30352e-06	6.01795	2.77205	13	663	protein complex subunit organization	7.00089e-06	7	Klp3A; CG12018; Chrac-16; Grip91; Grip84; mad2; dgt2; Cap-D2; Acf1; BubR1; SMC2; cnn; dgt5
embryo	GO:0009894	2.50535e-06	13.508	0.618799	7	148	regulation of catabolic process	7.54037e-06	7	mad2; aub; piwi; Cdc16; Zwilch; rod; BubR1
embryo	GO:0007093	2.59763e-06	18.0205	0.397202	6	95	mitotic cell cycle checkpoint	7.74294e-06	7	mad2; mre11; spel1; Zwilch; rod; BubR1
embryo	GO:0000003	2.83143e-06	4.27723	6.68554	20	1599	reproduction	8.35947e-06	7	fs(1)N; Klp3A; fs(1)M3; Grip91; yl; Grip84; Msh6; ndl; aub; piwi; spel1; nesd; lds; polybromo; ball; Cul5; BubR1; cnn; lat; clos
embryo	GO:0006974	3.07446e-06	8.88617	1.22924	9	294	cellular response to DNA damage stimulus	8.99133e-06	7	CG12018; Chrac-16; Msh6; DNApol-epsilon58; gkt; mre11; spel1; DNApol-epsilon255; ball
embryo	GO:0031324	3.70727e-06	6.20701	2.43757	12	583	negative regulation of cellular metabolic process	1.07407e-05	7	Msh6; Cdc27; mad2; aub; piwi; spel1; polybromo; Zwilch; rod; Acf1; BubR1; Orc6
embryo	GO:0000075	5.19951e-06	15.864	0.447375	6	107	cell cycle checkpoint	1.49245e-05	7	mad2; mre11; spel1; Zwilch; rod; BubR1
embryo	GO:0042176	5.67102e-06	23.0086	0.259227	5	62	regulation of protein catabolic process	1.61286e-05	7	mad2; Cdc16; Zwilch; rod; BubR1
embryo	GO:0051338	5.78916e-06	15.5534	0.455737	6	109	regulation of transferase activity	1.63149e-05	7	Cdk7; Cdc27; mad2; Zwilch; rod; BubR1
embryo	GO:0044265	6.29145e-06	8.09906	1.34212	9	321	cellular macromolecule catabolic process	1.75707e-05	7	Cdc27; mad2; aub; piwi; Cdc16; Cul5; Zwilch; rod; BubR1
embryo	GO:0010948	6.43204e-06	15.2547	0.464099	6	111	negative regulation of cell cycle process	1.7803e-05	7	mad2; mre11; spel1; Zwilch; rod; BubR1
embryo	GO:0044702	6.54553e-06	4.6055	4.62427	16	1106	single organism reproductive process	1.79568e-05	7	fs(1)N; Klp3A; fs(1)M3; yl; Grip84; ndl; aub; piwi; nesd; lds; polybromo; ball; Cul5; cnn; lat; clos
embryo	GO:0045930	7.89203e-06	14.6901	0.480823	6	115	negative regulation of mitotic cell cycle	2.14608e-05	7	mad2; mre11; spel1; Zwilch; rod; BubR1
embryo	GO:0045910	8.10378e-06	108.262	0.0418107	3	10	negative regulation of DNA recombination	2.1845e-05	7	Msh6; piwi; spel1
embryo	GO:0010605	1.09168e-05	5.54198	2.70934	12	648	negative regulation of macromolecule metabolic process	2.91741e-05	7	Msh6; Cdc27; mad2; aub; piwi; spel1; polybromo; Zwilch; rod; Acf1; BubR1; Orc6
embryo	GO:0044237	1.12525e-05	3.46632	19.442	35	4650	cellular metabolic process	2.98143e-05	7	Klp3A; Cdk7; CG2990; Orc4; CG12018; CG12398; CG8173; Msh6; Cdc27; DNApol-epsilon58; mad2; Bre1; gkt; CG13690; DNApol-alpha60; aub; piwi; mre11; spel1; lds; DNApol-alpha180; Cdc16; DNApol-epsilon255; polybromo; ball; Cul5; Zwilch; rod; Acf1; BubR1; hrg; lat; Orc6; DNApol-alpha73; clos
embryo	GO:0007276	1.28438e-05	4.54134	4.3065	15	1030	gamete generation	3.37422e-05	7	fs(1)N; fs(1)M3; yl; Grip84; ndl; aub; piwi; nesd; lds; polybromo; ball; Cul5; cnn; lat; clos
embryo	GO:0044238	1.51824e-05	3.43467	20.6461	36	4938	primary metabolic process	3.95509e-05	7	Klp3A; Cdk7; CG2990; Orc4; CG12018; CG12398; CG8173; Msh6; Cdc27; ndl; DNApol-epsilon58; mad2; Bre1; gkt; CG13690; DNApol-alpha60; aub; piwi; mre11; spel1; lds; DNApol-alpha180; Cdc16; DNApol-epsilon255; polybromo; ball; Cul5; Zwilch; rod; Acf1; BubR1; hrg; lat; Orc6; DNApol-alpha73; clos
embryo	GO:0019953	1.67944e-05	4.24019	4.97966	16	1191	sexual reproduction	4.33855e-05	7	fs(1)N; Klp3A; fs(1)M3; yl; Grip84; ndl; aub; piwi; nesd; lds; polybromo; ball; Cul5; cnn; lat; clos
embryo	GO:0031396	1.80552e-05	30.2721	0.158881	4	38	regulation of protein ubiquitination	4.62572e-05	7	mad2; Zwilch; rod; BubR1
embryo	GO:0009057	1.84205e-05	7.03151	1.53445	9	367	macromolecule catabolic process	4.68061e-05	7	Cdc27; mad2; aub; piwi; Cdc16; Cul5; Zwilch; rod; BubR1
embryo	GO:0009892	1.90696e-05	5.2208	2.86403	12	685	negative regulation of metabolic process	4.78586e-05	7	Msh6; Cdc27; mad2; aub; piwi; spel1; polybromo; Zwilch; rod; Acf1; BubR1; Orc6
embryo	GO:0000018	1.91434e-05	75.7653	0.0543539	3	13	regulation of DNA recombination	4.78586e-05	7	Msh6; piwi; spel1
embryo	GO:0044703	2.0066e-05	4.17338	5.05074	16	1208	multi-organism reproductive process	4.97637e-05	7	fs(1)N; Klp3A; fs(1)M3; yl; Grip84; ndl; aub; piwi; nesd; lds; polybromo; ball; Cul5; cnn; lat; clos
embryo	GO:0022607	2.12993e-05	4.5538	3.93439	14	941	cellular component assembly	5.24031e-05	7	fs(1)N; Klp3A; fs(1)M3; Grip91; Grip84; ndl; mad2; aub; polybromo; Cul5; Acf1; BubR1; cnn; clos
embryo	GO:0030198	2.22165e-05	28.5856	0.167243	4	40	extracellular matrix organization	5.35394e-05	7	fs(1)N; fs(1)M3; polybromo; clos
embryo	GO:1903320	2.22165e-05	28.5856	0.167243	4	40	regulation of protein modification by small protein conjugation or removal	5.35394e-05	7	mad2; Zwilch; rod; BubR1
embryo	GO:0034641	2.24276e-05	3.32739	12.0749	26	2888	cellular nitrogen compound metabolic process	5.35394e-05	7	Klp3A; Cdk7; CG2990; Orc4; CG12018; Msh6; Cdc27; DNApol-epsilon58; gkt; CG13690; DNApol-alpha60; aub; piwi; mre11; spel1; lds; DNApol-alpha180; DNApol-epsilon255; polybromo; Acf1; BubR1; hrg; lat; Orc6; DNApol-alpha73; clos
embryo	GO:0043086	2.2452e-05	17.0047	0.342848	5	82	negative regulation of catalytic activity	5.35394e-05	7	Cdc27; mad2; Zwilch; rod; BubR1
embryo	GO:0050790	2.33045e-05	7.86039	1.20415	8	288	regulation of catalytic activity	5.51481e-05	7	Cdk7; Cdc27; mad2; Zwilch; rod; Acf1; BubR1; Orc6
embryo	GO:0031330	2.45424e-05	27.8108	0.171424	4	41	negative regulation of cellular catabolic process	5.76376e-05	7	mad2; Zwilch; rod; BubR1
embryo	GO:0048523	2.5241e-05	4.26524	4.55737	15	1090	negative regulation of cellular process	5.88325e-05	7	Grip91; Msh6; Cdc27; mad2; aub; piwi; mre11; spel1; polybromo; Cul5; Zwilch; rod; Acf1; BubR1; Orc6
embryo	GO:0007304	2.63372e-05	11.7478	0.593712	6	142	chorion-containing eggshell formation	6.09293e-05	7	fs(1)N; fs(1)M3; ndl; aub; polybromo; clos
embryo	GO:0007143	2.67372e-05	16.363	0.355391	5	85	female meiotic division	6.09452e-05	7	Klp3A; lds; ball; BubR1; cnn
embryo	GO:0031400	2.67372e-05	16.363	0.355391	5	85	negative regulation of protein modification process	6.09452e-05	7	Cdc27; mad2; Zwilch; rod; BubR1
embryo	GO:1901987	2.74035e-05	11.6611	0.597893	6	143	regulation of cell cycle phase transition	6.15585e-05	7	mad2; mre11; Cdc16; Zwilch; rod; BubR1
embryo	GO:1901990	2.74035e-05	11.6611	0.597893	6	143	regulation of mitotic cell cycle phase transition	6.15585e-05	7	mad2; mre11; Cdc16; Zwilch; rod; BubR1
embryo	GO:0030703	2.85042e-05	11.5756	0.602074	6	144	eggshell formation	6.35705e-05	7	fs(1)N; fs(1)M3; ndl; aub; polybromo; clos
embryo	GO:0009895	2.9724e-05	26.3803	0.179786	4	43	negative regulation of catabolic process	6.58174e-05	7	mad2; Zwilch; rod; BubR1
embryo	GO:0022414	3.84824e-05	3.93459	5.32251	16	1273	reproductive process	8.46067e-05	7	fs(1)N; Klp3A; fs(1)M3; yl; Grip84; ndl; aub; piwi; nesd; lds; polybromo; ball; Cul5; cnn; lat; clos
embryo	GO:0030154	3.94182e-05	3.30647	10.114	23	2419	cell differentiation	8.60537e-05	7	fs(1)N; fs(1)M3; Psf3; Grip91; yl; Cdc27; ndl; aub; piwi; nesd; DNApol-alpha180; Cdc16; DNApol-epsilon255; polybromo; ball; Cul5; Acf1; BubR1; SMC2; cnn; lat; l(1)G0222; clos
embryo	GO:0043161	4.31359e-05	10.7114	0.648066	6	155	proteasome-mediated ubiquitin-dependent protein catabolic process	9.35115e-05	7	Cdc27; mad2; Cdc16; Zwilch; rod; BubR1
embryo	GO:0044092	4.57646e-05	14.5331	0.397202	5	95	negative regulation of molecular function	9.8521e-05	7	Cdc27; mad2; Zwilch; rod; BubR1
embryo	GO:0048477	4.85391e-05	4.71417	3.14835	12	753	oogenesis	0.000103773	7	fs(1)N; fs(1)M3; yl; ndl; aub; piwi; nesd; polybromo; ball; Cul5; lat; clos
embryo	GO:0044772	4.97503e-05	10.428	0.664791	6	159	mitotic cell cycle phase transition	0.00010493	7	mad2; mre11; Cdc16; Zwilch; rod; BubR1
embryo	GO:0045861	5.00956e-05	22.8519	0.204873	4	49	negative regulation of proteolysis	0.00010493	7	mad2; Zwilch; rod; BubR1
embryo	GO:0051052	5.00956e-05	22.8519	0.204873	4	49	regulation of DNA metabolic process	0.00010493	7	Msh6; DNApol-epsilon58; piwi; spel1
embryo	GO:0050794	5.10087e-05	3.13799	12.6227	26	3019	regulation of cellular process	0.000106126	7	Klp3A; Cdk7; Grip91; Grip84; Msh6; Cdc27; ndl; DNApol-epsilon58; mad2; aub; piwi; mre11; spel1; Cdc16; polybromo; ball; Cul5; Zwilch; rod; Acf1; BubR1; cnn; dgt5; Orc6; wech; clos
embryo	GO:0010498	5.15247e-05	10.3594	0.668972	6	160	proteasomal protein catabolic process	0.000106484	7	Cdc27; mad2; Cdc16; Zwilch; rod; BubR1
embryo	GO:0007292	5.38032e-05	4.66061	3.1818	12	761	female gamete generation	0.000110457	7	fs(1)N; fs(1)M3; yl; ndl; aub; piwi; nesd; polybromo; ball; Cul5; lat; clos
embryo	GO:0044085	5.45039e-05	4.1493	4.28142	14	1024	cellular component biogenesis	0.000111159	7	fs(1)N; Klp3A; fs(1)M3; Grip91; Grip84; ndl; mad2; aub; polybromo; Cul5; Acf1; BubR1; cnn; clos
embryo	GO:0048609	5.61285e-05	3.95305	4.87931	15	1167	multicellular organismal reproductive process	0.000113724	7	fs(1)N; fs(1)M3; yl; Grip84; ndl; aub; piwi; nesd; lds; polybromo; ball; Cul5; cnn; lat; clos
embryo	GO:0044770	5.71543e-05	10.159	0.681515	6	163	cell cycle phase transition	0.000115051	7	mad2; mre11; Cdc16; Zwilch; rod; BubR1
embryo	GO:1901988	6.43545e-05	13.4766	0.426469	5	102	negative regulation of cell cycle phase transition	0.000127884	7	mad2; mre11; Zwilch; rod; BubR1
embryo	GO:1901991	6.43545e-05	13.4766	0.426469	5	102	negative regulation of mitotic cell cycle phase transition	0.000127884	7	mad2; mre11; Zwilch; rod; BubR1
embryo	GO:0048869	7.66074e-05	3.14223	10.5321	23	2519	cellular developmental process	0.000150735	7	fs(1)N; fs(1)M3; Psf3; Grip91; yl; Cdc27; ndl; aub; piwi; nesd; DNApol-alpha180; Cdc16; DNApol-epsilon255; polybromo; ball; Cul5; Acf1; BubR1; SMC2; cnn; lat; l(1)G0222; clos
embryo	GO:0065009	7.72365e-05	6.5804	1.42575	8	341	regulation of molecular function	0.000150735	7	Cdk7; Cdc27; mad2; Zwilch; rod; Acf1; BubR1; Orc6
embryo	GO:0006511	7.73125e-05	7.74016	1.04945	7	251	ubiquitin-dependent protein catabolic process	0.000150735	7	Cdc27; mad2; Cdc16; Cul5; Zwilch; rod; BubR1
embryo	GO:0019941	8.33022e-05	7.64426	1.06199	7	254	modification-dependent protein catabolic process	0.000161398	7	Cdc27; mad2; Cdc16; Cul5; Zwilch; rod; BubR1
embryo	GO:0043062	8.4987e-05	19.7644	0.23414	4	56	extracellular structure organization	0.000163383	7	fs(1)N; fs(1)M3; polybromo; clos
embryo	GO:0043632	8.5381e-05	7.61281	1.06617	7	255	modification-dependent macromolecule catabolic process	0.000163383	7	Cdc27; mad2; Cdc16; Cul5; Zwilch; rod; BubR1
embryo	GO:0044257	8.96661e-05	7.55067	1.07454	7	257	cellular protein catabolic process	0.000169491	7	Cdc27; mad2; Cdc16; Cul5; Zwilch; rod; BubR1
embryo	GO:0051603	8.96661e-05	7.55067	1.07454	7	257	proteolysis involved in cellular protein catabolic process	0.000169491	7	Cdc27; mad2; Cdc16; Cul5; Zwilch; rod; BubR1
embryo	GO:0071704	9.37048e-05	3.04173	22.168	36	5302	organic substance metabolic process	0.000176052	7	Klp3A; Cdk7; CG2990; Orc4; CG12018; CG12398; CG8173; Msh6; Cdc27; ndl; DNApol-epsilon58; mad2; Bre1; gkt; CG13690; DNApol-alpha60; aub; piwi; mre11; spel1; lds; DNApol-alpha180; Cdc16; DNApol-epsilon255; polybromo; ball; Cul5; Zwilch; rod; Acf1; BubR1; hrg; lat; Orc6; DNApol-alpha73; clos
embryo	GO:0048519	0.000107463	3.71012	5.16362	15	1235	negative regulation of biological process	0.000200685	7	Grip91; Msh6; Cdc27; mad2; aub; piwi; mre11; spel1; polybromo; Cul5; Zwilch; rod; Acf1; BubR1; Orc6
embryo	GO:0051053	0.000115091	37.852	0.0961647	3	23	negative regulation of DNA metabolic process	0.000213548	7	Msh6; piwi; spel1
embryo	GO:0006807	0.000115729	2.95308	13.208	26	3159	nitrogen compound metabolic process	0.000213548	7	Klp3A; Cdk7; CG2990; Orc4; CG12018; Msh6; Cdc27; DNApol-epsilon58; gkt; CG13690; DNApol-alpha60; aub; piwi; mre11; spel1; lds; DNApol-alpha180; DNApol-epsilon255; polybromo; Acf1; BubR1; hrg; lat; Orc6; DNApol-alpha73; clos
embryo	GO:0022412	0.000117298	4.03066	4.00965	13	959	cellular process involved in reproduction in multicellular organism	0.000215162	7	fs(1)N; fs(1)M3; yl; ndl; aub; piwi; nesd; polybromo; ball; Cul5; cnn; lat; clos
embryo	GO:0030163	0.000127737	7.11447	1.13725	7	272	protein catabolic process	0.000232931	7	Cdc27; mad2; Cdc16; Cul5; Zwilch; rod; BubR1
embryo	GO:0007076	0.000131145	36.0466	0.100346	3	24	mitotic chromosome condensation	0.000237749	7	aub; Cap-D2; SMC2
embryo	GO:0030162	0.00015039	11.1548	0.510091	5	122	regulation of proteolysis	0.000271052	7	mad2; Cdc16; Zwilch; rod; BubR1
embryo	GO:0044699	0.00016078	3.57991	31.5504	44	7546	single-organism process	0.000288103	7	fs(1)N; Klp3A; Cdk7; fs(1)M3; Psf3; CG12018; Grip91; yl; CG12398; Grip84; Msh6; Cdc27; ndl; DNApol-epsilon58; mad2; Bre1; gkt; DNApol-alpha60; aub; piwi; mre11; dgt2; spel1; nesd; lds; DNApol-alpha180; Cdc16; DNApol-epsilon255; polybromo; ball; Cul5; Cap-D2; Zwilch; rod; Acf1; BubR1; SMC2; cnn; lat; dgt5; Orc6; wech; l(1)G0222; clos
embryo	GO:0016567	0.000162503	8.32734	0.823671	6	197	protein ubiquitination	0.000289517	7	mad2; Bre1; Cul5; Zwilch; rod; BubR1
embryo	GO:0007362	0.000167476	32.9068	0.108708	3	26	terminal region determination	0.000296671	7	fs(1)N; fs(1)M3; clos
embryo	GO:0003006	0.000169984	3.87067	4.16017	13	995	developmental process involved in reproduction	0.000299404	7	fs(1)N; fs(1)M3; yl; ndl; aub; piwi; nesd; polybromo; ball; Cul5; cnn; lat; clos
embryo	GO:0007281	0.000206076	4.00035	3.66262	12	876	germ cell development	0.000360924	7	fs(1)N; fs(1)M3; yl; ndl; aub; piwi; nesd; polybromo; ball; Cul5; lat; clos
embryo	GO:0032446	0.0002183	7.86677	0.869663	6	208	protein modification by small protein conjugation	0.000380185	7	mad2; Bre1; Cul5; Zwilch; rod; BubR1
embryo	GO:0080090	0.000232263	3.31799	6.18381	16	1479	regulation of primary metabolic process	0.000401704	7	Cdk7; Msh6; Cdc27; DNApol-epsilon58; mad2; aub; piwi; spel1; Cdc16; polybromo; Zwilch; rod; Acf1; BubR1; Orc6; clos
embryo	GO:0006281	0.000233248	10.1072	0.560264	5	134	DNA repair	0.000401704	7	Msh6; gkt; mre11; spel1; DNApol-epsilon255
embryo	GO:0050789	0.00024693	2.78515	13.7892	26	3298	regulation of biological process	0.00042182	7	Klp3A; Cdk7; Grip91; Grip84; Msh6; Cdc27; ndl; DNApol-epsilon58; mad2; aub; piwi; mre11; spel1; Cdc16; polybromo; ball; Cul5; Zwilch; rod; Acf1; BubR1; cnn; dgt5; Orc6; wech; clos
embryo	GO:0010927	0.000248201	7.6736	0.890568	6	213	cellular component assembly involved in morphogenesis	0.00042182	7	fs(1)N; fs(1)M3; ndl; aub; polybromo; clos
embryo	GO:0006301	0.000254453	123.81	0.0250864	2	6	postreplication repair	0.00042182	7	Msh6; spel1
embryo	GO:0031442	0.000254453	123.81	0.0250864	2	6	positive regulation of mRNA 3'-end processing	0.00042182	7	aub; piwi
embryo	GO:0050685	0.000254453	123.81	0.0250864	2	6	positive regulation of mRNA processing	0.00042182	7	aub; piwi
embryo	GO:0060211	0.000254453	123.81	0.0250864	2	6	regulation of nuclear-transcribed mRNA poly(A) tail shortening	0.00042182	7	aub; piwi
embryo	GO:0060213	0.000254453	123.81	0.0250864	2	6	positive regulation of nuclear-transcribed mRNA poly(A) tail shortening	0.00042182	7	aub; piwi
embryo	GO:0045934	0.000256988	5.47602	1.69752	8	406	negative regulation of nucleobase-containing compound metabolic process	0.000423756	7	Msh6; aub; piwi; spel1; polybromo; Acf1; BubR1; Orc6
embryo	GO:0007279	0.000258452	28.0227	0.125432	3	30	pole cell formation	0.000423916	7	aub; piwi; cnn
embryo	GO:0006310	0.000265252	14.4531	0.31358	4	75	DNA recombination	0.000432779	7	Klp3A; Msh6; piwi; spel1
embryo	GO:0031323	0.000328434	3.20572	6.37195	16	1524	regulation of cellular metabolic process	0.000533061	7	Cdk7; Msh6; Cdc27; DNApol-epsilon58; mad2; aub; piwi; spel1; Cdc16; polybromo; Zwilch; rod; Acf1; BubR1; Orc6; clos
embryo	GO:0032504	0.000333045	3.30831	5.71553	15	1367	multicellular organism reproduction	0.000537728	7	fs(1)N; fs(1)M3; yl; Grip84; ndl; aub; piwi; nesd; lds; polybromo; ball; Cul5; cnn; lat; clos
embryo	GO:0007131	0.00034426	25.2143	0.137975	3	33	reciprocal meiotic recombination	0.000550106	7	Klp3A; Msh6; spel1
embryo	GO:0007354	0.00034426	25.2143	0.137975	3	33	zygotic determination of anterior/posterior axis, embryo	0.000550106	7	fs(1)N; fs(1)M3; clos
embryo	GO:1900151	0.00035528	99.04	0.0292675	2	7	regulation of nuclear-transcribed mRNA catabolic process, deadenylation-dependent decay	0.000561923	7	aub; piwi
embryo	GO:1900153	0.00035528	99.04	0.0292675	2	7	positive regulation of nuclear-transcribed mRNA catabolic process, deadenylation-dependent decay	0.000561923	7	aub; piwi
embryo	GO:0051704	0.000364722	3.17214	6.43049	16	1538	multi-organism process	0.00057023	7	fs(1)N; Klp3A; fs(1)M3; yl; Grip84; ndl; aub; piwi; nesd; lds; polybromo; ball; Cul5; cnn; lat; clos
embryo	GO:0060255	0.000364722	3.17214	6.43049	16	1538	regulation of macromolecule metabolic process	0.00057023	7	Cdk7; Msh6; Cdc27; DNApol-epsilon58; mad2; aub; piwi; spel1; Cdc16; polybromo; Zwilch; rod; Acf1; BubR1; Orc6; clos
embryo	GO:0030707	0.000366051	5.94114	1.35049	7	323	ovarian follicle cell development	0.00057023	7	fs(1)N; fs(1)M3; ndl; aub; polybromo; lat; clos
embryo	GO:0002066	0.000372943	5.92191	1.35467	7	324	columnar/cuboidal epithelial cell development	0.000578062	7	fs(1)N; fs(1)M3; ndl; aub; polybromo; lat; clos
embryo	GO:0035825	0.000376464	24.3989	0.142156	3	34	reciprocal DNA recombination	0.000580616	7	Klp3A; Msh6; spel1
embryo	GO:0065007	0.000383377	2.67514	15.0059	27	3589	biological regulation	0.000588351	7	Klp3A; Cdk7; Grip91; CG12398; Grip84; Msh6; Cdc27; ndl; DNApol-epsilon58; mad2; aub; piwi; mre11; spel1; Cdc16; polybromo; ball; Cul5; Zwilch; rod; Acf1; BubR1; cnn; dgt5; Orc6; wech; clos
embryo	GO:0032268	0.000390316	5.12907	1.80622	8	432	regulation of cellular protein metabolic process	0.000596049	7	Cdk7; Cdc27; mad2; aub; Cdc16; Zwilch; rod; BubR1
embryo	GO:0051225	0.000409577	12.8177	0.35121	4	84	spindle assembly	0.000622397	7	Klp3A; Grip84; mad2; BubR1
embryo	GO:0002065	0.000416522	5.80901	1.37975	7	330	columnar/cuboidal epithelial cell differentiation	0.000629863	7	fs(1)N; fs(1)M3; ndl; aub; polybromo; lat; clos
embryo	GO:0006342	0.000443498	8.73626	0.643885	5	154	chromatin silencing	0.000667399	7	aub; piwi; polybromo; BubR1; Orc6
embryo	GO:0007277	0.00044655	22.9165	0.150519	3	36	pole cell development	0.000668746	7	aub; piwi; cnn
embryo	GO:0045814	0.000456843	8.6773	0.648066	5	155	negative regulation of gene expression, epigenetic	0.000680872	7	aub; piwi; polybromo; BubR1; Orc6
embryo	GO:0006271	0.000472439	82.5267	0.0334486	2	8	DNA strand elongation involved in DNA replication	0.000687587	7	CG2990; DNApol-alpha180
embryo	GO:0022616	0.000472439	82.5267	0.0334486	2	8	DNA strand elongation	0.000687587	7	CG2990; DNApol-alpha180
embryo	GO:0061013	0.000472439	82.5267	0.0334486	2	8	regulation of mRNA catabolic process	0.000687587	7	aub; piwi
embryo	GO:0061014	0.000472439	82.5267	0.0334486	2	8	positive regulation of mRNA catabolic process	0.000687587	7	aub; piwi
embryo	GO:1903313	0.000472439	82.5267	0.0334486	2	8	positive regulation of mRNA metabolic process	0.000687587	7	aub; piwi
embryo	GO:1901575	0.000475709	4.47824	2.34976	9	562	organic substance catabolic process	0.000689111	7	Cdc27; mad2; aub; piwi; Cdc16; Cul5; Zwilch; rod; BubR1
embryo	GO:0044248	0.000488161	4.46135	2.35812	9	564	cellular catabolic process	0.00070386	7	Cdc27; mad2; aub; piwi; Cdc16; Cul5; Zwilch; rod; BubR1
embryo	GO:0051172	0.000519818	4.90129	1.88566	8	451	negative regulation of nitrogen compound metabolic process	0.000746035	7	Msh6; aub; piwi; spel1; polybromo; Acf1; BubR1; Orc6
embryo	GO:0016568	0.000524151	6.62871	1.02436	6	245	chromatin modification	0.000748787	7	Chrac-16; Bre1; polybromo; ball; Acf1; BubR1
embryo	GO:0032269	0.000543394	8.33947	0.673153	5	161	negative regulation of cellular protein metabolic process	0.000769188	7	Cdc27; mad2; Zwilch; rod; BubR1
embryo	GO:0051248	0.000543394	8.33947	0.673153	5	161	negative regulation of protein metabolic process	0.000769188	7	Cdc27; mad2; Zwilch; rod; BubR1
embryo	GO:0051246	0.000567306	4.83337	1.91075	8	457	regulation of protein metabolic process	0.000799386	7	Cdk7; Cdc27; mad2; aub; Cdc16; Zwilch; rod; BubR1
embryo	GO:0002064	0.000592145	5.46122	1.46338	7	350	epithelial cell development	0.00083061	7	fs(1)N; fs(1)M3; ndl; aub; polybromo; lat; clos
embryo	GO:0007306	0.000602854	11.5131	0.38884	4	93	eggshell chorion assembly	0.000841823	7	fs(1)N; ndl; aub; polybromo
embryo	GO:0033554	0.000643845	4.28326	2.45011	9	586	cellular response to stress	0.000895032	7	CG12018; Chrac-16; Msh6; DNApol-epsilon58; gkt; mre11; spel1; DNApol-epsilon255; ball
embryo	GO:0031399	0.00074573	6.17986	1.09544	6	262	regulation of protein modification process	0.00103204	7	Cdk7; Cdc27; mad2; Zwilch; rod; BubR1
embryo	GO:0006298	0.000755219	61.885	0.0418107	2	10	mismatch repair	0.00103253	7	Msh6; spel1
embryo	GO:0042766	0.000755219	61.885	0.0418107	2	10	nucleosome mobilization	0.00103253	7	Chrac-16; Acf1
embryo	GO:0031124	0.00075608	18.8954	0.179786	3	43	mRNA 3'-end processing	0.00103253	7	aub; piwi; hrg
embryo	GO:0070647	0.000775947	6.13094	1.1038	6	264	protein modification by small protein conjugation or removal	0.00105501	7	mad2; Bre1; Cul5; Zwilch; rod; BubR1
embryo	GO:0048856	0.000781938	2.53453	14.7592	26	3530	anatomical structure development	0.00105631	7	fs(1)N; fs(1)M3; Psf3; Grip91; yl; Cdc27; ndl; Bre1; gkt; aub; piwi; nesd; DNApol-alpha180; Cdc16; DNApol-epsilon255; polybromo; ball; Cul5; Acf1; BubR1; SMC2; cnn; lat; wech; l(1)G0222; clos
embryo	GO:0034645	0.000783716	2.79383	8.32452	18	1991	cellular macromolecule biosynthetic process	0.00105631	7	Cdk7; CG2990; Orc4; CG12018; DNApol-epsilon58; DNApol-alpha60; aub; piwi; lds; DNApol-alpha180; DNApol-epsilon255; polybromo; Acf1; BubR1; lat; Orc6; DNApol-alpha73; clos
embryo	GO:0009059	0.000822778	2.78041	8.35796	18	1999	macromolecule biosynthetic process	0.00110416	7	Cdk7; CG2990; Orc4; CG12018; DNApol-epsilon58; DNApol-alpha60; aub; piwi; lds; DNApol-alpha180; DNApol-epsilon255; polybromo; Acf1; BubR1; lat; Orc6; DNApol-alpha73; clos
embryo	GO:0030261	0.000864258	17.9927	0.188148	3	45	chromosome condensation	0.00114987	7	aub; Cap-D2; SMC2
embryo	GO:0070507	0.000864258	17.9927	0.188148	3	45	regulation of microtubule cytoskeleton organization	0.00114987	7	Grip91; mad2; cnn
embryo	GO:0007275	0.00103808	2.50545	13.3	24	3181	multicellular organismal development	0.00137523	7	fs(1)N; fs(1)M3; Psf3; Grip91; CG12398; Cdc27; ndl; Bre1; gkt; aub; piwi; DNApol-alpha180; Cdc16; DNApol-epsilon255; polybromo; ball; Cul5; Acf1; BubR1; SMC2; cnn; wech; l(1)G0222; clos
embryo	GO:0007020	0.00110174	49.5	0.0501729	2	12	microtubule nucleation	0.00145336	7	Grip91; Grip84
embryo	GO:0090307	0.001109	16.4228	0.204873	3	49	mitotic spindle assembly	0.00145674	7	Klp3A; mad2; BubR1
embryo	GO:0048646	0.00117858	3.91186	2.66752	9	638	anatomical structure formation involved in morphogenesis	0.0015416	7	fs(1)N; fs(1)M3; ndl; aub; piwi; polybromo; Cul5; cnn; clos
embryo	GO:0008152	0.00122548	2.49804	24.6892	36	5905	metabolic process	0.00159622	7	Klp3A; Cdk7; CG2990; Orc4; CG12018; CG12398; CG8173; Msh6; Cdc27; ndl; DNApol-epsilon58; mad2; Bre1; gkt; CG13690; DNApol-alpha60; aub; piwi; mre11; spel1; lds; DNApol-alpha180; Cdc16; DNApol-epsilon255; polybromo; ball; Cul5; Zwilch; rod; Acf1; BubR1; hrg; lat; Orc6; DNApol-alpha73; clos
embryo	GO:1902850	0.00124618	15.736	0.213235	3	51	microtubule cytoskeleton organization involved in mitosis	0.00161638	7	Klp3A; mad2; BubR1
embryo	GO:0006325	0.00127688	4.75913	1.66825	7	399	chromatin organization	0.0016493	7	Chrac-16; Bre1; piwi; polybromo; ball; Acf1; BubR1
embryo	GO:0008630	0.00129857	44.9964	0.0543539	2	13	intrinsic apoptotic signaling pathway in response to DNA damage	0.00167036	7	Msh6; spel1
embryo	GO:0030855	0.00131431	4.73418	1.67661	7	401	epithelial cell differentiation	0.00168361	7	fs(1)N; fs(1)M3; ndl; aub; polybromo; lat; clos
embryo	GO:0044767	0.00137976	2.40328	16.1682	27	3867	single-organism developmental process	0.00176019	7	fs(1)N; fs(1)M3; Psf3; Grip91; yl; CG12398; Cdc27; ndl; Bre1; gkt; aub; piwi; nesd; DNApol-alpha180; Cdc16; DNApol-epsilon255; polybromo; ball; Cul5; Acf1; BubR1; SMC2; cnn; lat; wech; l(1)G0222; clos
embryo	GO:0032886	0.0013936	15.1041	0.221597	3	53	regulation of microtubule-based process	0.00177056	7	Grip91; mad2; cnn
embryo	GO:0019222	0.00140033	2.75581	7.25834	16	1736	regulation of metabolic process	0.00177185	7	Cdk7; Msh6; Cdc27; DNApol-epsilon58; mad2; aub; piwi; spel1; Cdc16; polybromo; Zwilch; rod; Acf1; BubR1; Orc6; clos
embryo	GO:0031331	0.00147125	14.8067	0.225778	3	54	positive regulation of cellular catabolic process	0.00185401	7	aub; piwi; Cdc16
embryo	GO:0000289	0.00151095	41.2433	0.058535	2	14	nuclear-transcribed mRNA poly(A) tail shortening	0.00189634	7	aub; piwi
embryo	GO:0032502	0.00165029	2.3656	16.3438	27	3909	developmental process	0.00206286	7	fs(1)N; fs(1)M3; Psf3; Grip91; yl; CG12398; Cdc27; ndl; Bre1; gkt; aub; piwi; nesd; DNApol-alpha180; Cdc16; DNApol-epsilon255; polybromo; ball; Cul5; Acf1; BubR1; SMC2; cnn; lat; wech; l(1)G0222; clos
embryo	GO:0065003	0.00178565	4.47559	1.76859	7	423	macromolecular complex assembly	0.0022231	7	Klp3A; Grip91; Grip84; mad2; aub; Acf1; BubR1
embryo	GO:0031440	0.00198184	35.3457	0.0668972	2	16	regulation of mRNA 3'-end processing	0.00245748	7	aub; piwi
embryo	GO:0009056	0.00205006	3.59159	2.88912	9	691	catabolic process	0.00253194	7	Cdc27; mad2; aub; piwi; Cdc16; Cul5; Zwilch; rod; BubR1
embryo	GO:0040029	0.00206077	6.10849	0.907293	5	217	regulation of gene expression, epigenetic	0.00253508	7	aub; piwi; polybromo; BubR1; Orc6
embryo	GO:0031123	0.00209129	13.0123	0.255045	3	61	RNA 3'-end processing	0.00255501	7	aub; piwi; hrg
embryo	GO:0051297	0.00209346	8.1078	0.543539	4	130	centrosome organization	0.00255501	7	Grip91; Grip84; cnn; lat
embryo	GO:0016458	0.00218795	6.02177	0.919836	5	220	gene silencing	0.00265986	7	aub; piwi; polybromo; BubR1; Orc6
embryo	GO:0032501	0.00220163	2.2979	18.4678	29	4417	multicellular organismal process	0.00266604	7	fs(1)N; fs(1)M3; Psf3; Grip91; yl; CG12398; Grip84; Cdc27; ndl; Bre1; gkt; aub; piwi; nesd; lds; DNApol-alpha180; Cdc16; DNApol-epsilon255; polybromo; ball; Cul5; Acf1; BubR1; SMC2; cnn; lat; wech; l(1)G0222; clos
embryo	GO:0006323	0.00221326	7.97982	0.551902	4	132	DNA packaging	0.00266969	7	aub; Cap-D2; Acf1; SMC2
embryo	GO:0010529	0.00224008	32.9867	0.0710782	2	17	negative regulation of transposition	0.00269157	7	aub; piwi
embryo	GO:0007399	0.0023948	2.66363	6.90295	15	1651	nervous system development	0.00285263	7	Psf3; Grip91; Cdc27; Bre1; gkt; DNApol-alpha180; Cdc16; DNApol-epsilon255; ball; Cul5; Acf1; BubR1; SMC2; cnn; l(1)G0222
embryo	GO:0009896	0.00239977	12.3694	0.267589	3	64	positive regulation of catabolic process	0.00285263	7	aub; piwi; Cdc16
embryo	GO:0031023	0.00240173	7.79517	0.564445	4	135	microtubule organizing center organization	0.00285263	7	Grip91; Grip84; cnn; lat
embryo	GO:0000288	0.00251337	30.9225	0.0752593	2	18	nuclear-transcribed mRNA catabolic process, deadenylation-dependent decay	0.0029513	7	aub; piwi
embryo	GO:0010528	0.00251337	30.9225	0.0752593	2	18	regulation of transposition	0.0029513	7	aub; piwi
embryo	GO:0090224	0.00251337	30.9225	0.0752593	2	18	regulation of spindle organization	0.0029513	7	Grip91; mad2
embryo	GO:0032196	0.00280156	29.1012	0.0794404	2	19	transposition	0.00325275	7	aub; piwi
embryo	GO:0046785	0.00280156	29.1012	0.0794404	2	19	microtubule polymerization	0.00325275	7	Grip91; Grip84
embryo	GO:0097193	0.00280156	29.1012	0.0794404	2	19	intrinsic apoptotic signaling pathway	0.00325275	7	Msh6; spel1
embryo	GO:1903308	0.00285291	11.6044	0.284313	3	68	regulation of chromatin modification	0.0033	7	polybromo; Acf1; BubR1
embryo	GO:0071103	0.00303313	7.28869	0.602074	4	144	DNA conformation change	0.00349543	7	aub; Cap-D2; Acf1; SMC2
embryo	GO:0006461	0.00307338	4.62084	1.44665	6	346	protein complex assembly	0.0035287	7	Klp3A; Grip91; Grip84; mad2; Acf1; BubR1
embryo	GO:0070271	0.00320735	4.57929	1.45919	6	349	protein complex biogenesis	0.00366892	7	Klp3A; Grip91; Grip84; mad2; Acf1; BubR1
embryo	GO:0016070	0.00322049	2.64538	6.38868	14	1528	RNA metabolic process	0.00367041	7	Cdk7; CG2990; Cdc27; CG13690; DNApol-alpha60; aub; piwi; lds; polybromo; Acf1; BubR1; hrg; Orc6; clos
embryo	GO:1902275	0.00335548	10.9281	0.301037	3	72	regulation of chromatin organization	0.00381025	7	polybromo; Acf1; BubR1
embryo	GO:0007140	0.00351207	6.98573	0.627161	4	150	male meiosis	0.0039735	7	Klp3A; Grip91; nesd; BubR1
embryo	GO:0045132	0.00362582	10.6186	0.309399	3	74	meiotic chromosome segregation	0.00408729	7	Klp3A; BubR1; cnn
embryo	GO:0009798	0.00373072	5.29343	1.04109	5	249	axis specification	0.0041903	7	fs(1)N; fs(1)M3; ndl; aub; clos
embryo	GO:0007062	0.00410096	23.5505	0.0961647	2	23	sister chromatid cohesion	0.00458952	7	BubR1; SMC2
embryo	GO:0070925	0.00412814	5.16383	1.06617	5	255	organelle assembly	0.00460333	7	Klp3A; Grip84; mad2; BubR1; cnn
embryo	GO:0045892	0.00432787	4.29541	1.55118	6	371	negative regulation of transcription, DNA-templated	0.00477451	7	aub; piwi; polybromo; Acf1; BubR1; Orc6
embryo	GO:1902679	0.00432787	4.29541	1.55118	6	371	negative regulation of RNA biosynthetic process	0.00477451	7	aub; piwi; polybromo; Acf1; BubR1; Orc6
embryo	GO:1903507	0.00432787	4.29541	1.55118	6	371	negative regulation of nucleic acid-templated transcription	0.00477451	7	aub; piwi; polybromo; Acf1; BubR1; Orc6
embryo	GO:0030717	0.00446185	22.4782	0.100346	2	24	karyosome formation	0.00488754	7	aub; ball
embryo	GO:0031122	0.00446185	22.4782	0.100346	2	24	cytoplasmic microtubule organization	0.00488754	7	Grip84; dgt2
embryo	GO:0000079	0.00483692	21.4991	0.104527	2	25	regulation of cyclin-dependent protein serine/threonine kinase activity	0.00526121	7	Cdk7; Cdc27
embryo	GO:1904029	0.00483692	21.4991	0.104527	2	25	regulation of cyclin-dependent protein kinase activity	0.00526121	7	Cdk7; Cdc27
embryo	GO:0051253	0.00517817	4.13193	1.60971	6	385	negative regulation of RNA metabolic process	0.0056127	7	aub; piwi; polybromo; Acf1; BubR1; Orc6
embryo	GO:0007351	0.00525304	6.20986	0.70242	4	168	tripartite regional subdivision	0.00565432	7	fs(1)N; fs(1)M3; aub; clos
embryo	GO:0008595	0.00525304	6.20986	0.70242	4	168	anterior/posterior axis specification, embryo	0.00565432	7	fs(1)N; fs(1)M3; aub; clos
embryo	GO:0007127	0.00534942	9.18591	0.355391	3	85	meiosis I	0.00573813	7	Klp3A; Msh6; spel1
embryo	GO:0016246	0.00562909	19.776	0.112889	2	27	RNA interference	0.0060173	7	aub; piwi
embryo	GO:0000578	0.0058234	6.02367	0.723326	4	173	embryonic axis specification	0.00620362	7	fs(1)N; fs(1)M3; aub; clos
embryo	GO:0009948	0.00594224	5.98775	0.727507	4	174	anterior/posterior axis specification	0.00630854	7	fs(1)N; fs(1)M3; aub; clos
embryo	GO:0009411	0.00604596	19.0138	0.11707	2	28	response to UV	0.00637499	7	Msh6; spel1
embryo	GO:0070828	0.00604596	19.0138	0.11707	2	28	heterochromatin organization	0.00637499	7	piwi; Acf1
embryo	GO:0017145	0.00627038	8.65447	0.376297	3	90	stem cell division	0.00658922	7	aub; piwi; cnn
embryo	GO:0090068	0.00647653	18.3081	0.121251	2	29	positive regulation of cell cycle process	0.00678054	7	DNApol-epsilon58; Cdc16
embryo	GO:0044707	0.0064962	2.09107	15.9968	25	3826	single-multicellular organism process	0.00678054	7	fs(1)N; fs(1)M3; Psf3; Grip91; CG12398; Cdc27; ndl; Bre1; gkt; aub; piwi; DNApol-alpha180; Cdc16; DNApol-epsilon255; polybromo; ball; Cul5; Acf1; BubR1; SMC2; cnn; lat; wech; l(1)G0222; clos
embryo	GO:0048468	0.00682382	2.40369	6.94058	14	1660	cell development	0.0070986	7	fs(1)N; fs(1)M3; yl; ndl; aub; piwi; nesd; polybromo; ball; Cul5; Acf1; cnn; lat; clos
embryo	GO:0044249	0.00734495	2.19803	10.1266	18	2422	cellular biosynthetic process	0.00761516	7	Cdk7; CG2990; Orc4; CG12018; DNApol-epsilon58; DNApol-alpha60; aub; piwi; lds; DNApol-alpha180; DNApol-epsilon255; polybromo; Acf1; BubR1; lat; Orc6; DNApol-alpha73; clos
embryo	GO:0010558	0.00775039	3.78103	1.75187	6	419	negative regulation of macromolecule biosynthetic process	0.00798213	7	aub; piwi; polybromo; Acf1; BubR1; Orc6
embryo	GO:2000113	0.00775039	3.78103	1.75187	6	419	negative regulation of cellular macromolecule biosynthetic process	0.00798213	7	aub; piwi; polybromo; Acf1; BubR1; Orc6
embryo	GO:0097190	0.00784925	16.4733	0.133794	2	32	apoptotic signaling pathway	0.00805718	7	Msh6; spel1
embryo	GO:1901576	0.00787629	2.18	10.1935	18	2438	organic substance biosynthetic process	0.00805825	7	Cdk7; CG2990; Orc4; CG12018; DNApol-epsilon58; DNApol-alpha60; aub; piwi; lds; DNApol-alpha180; DNApol-epsilon255; polybromo; Acf1; BubR1; lat; Orc6; DNApol-alpha73; clos
embryo	GO:0008356	0.00793042	7.92052	0.409745	3	98	asymmetric cell division	0.00808694	7	aub; piwi; cnn
embryo	GO:0032774	0.00800711	2.71959	4.21034	10	1007	RNA biosynthetic process	0.00813837	7	Cdk7; DNApol-alpha60; aub; piwi; lds; polybromo; Acf1; BubR1; Orc6; clos
embryo	GO:0044712	0.00835499	4.32982	1.26268	5	302	single-organism catabolic process	0.00846421	7	mad2; Cdc16; Zwilch; rod; BubR1
embryo	GO:0009890	0.00856368	3.69761	1.7895	6	428	negative regulation of biosynthetic process	0.00861929	7	aub; piwi; polybromo; Acf1; BubR1; Orc6
embryo	GO:0031327	0.00856368	3.69761	1.7895	6	428	negative regulation of cellular biosynthetic process	0.00861929	7	aub; piwi; polybromo; Acf1; BubR1; Orc6
embryo	GO:0044710	0.00887861	2.22115	8.70081	16	2081	single-organism metabolic process	0.00890734	7	Klp3A; CG12398; Msh6; DNApol-epsilon58; mad2; Bre1; gkt; piwi; mre11; spel1; Cdc16; DNApol-epsilon255; ball; Zwilch; rod; BubR1
embryo	GO:0000956	0.00986427	14.5306	0.150519	2	36	nuclear-transcribed mRNA catabolic process	0.00986427	7	aub; piwi
embryo	GO:0048477	2.07206e-07	13.0911	1.33199	10	753	oogenesis	1.05226e-05	8	swa; dec-1; Cp7Fb; Cp36; wisp; toc; BicC; osk; cup; CG42388
embryo	GO:0007292	2.28753e-07	12.9427	1.34614	10	761	female gamete generation	1.05226e-05	8	swa; dec-1; Cp7Fb; Cp36; wisp; toc; BicC; osk; cup; CG42388
embryo	GO:0044702	7.36123e-07	10.3379	1.95642	11	1106	single organism reproductive process	1.38204e-05	8	png; swa; dec-1; Cp7Fb; Cp36; wisp; toc; BicC; osk; cup; CG42388
embryo	GO:0007281	8.4652e-07	11.1134	1.54957	10	876	germ cell development	1.38204e-05	8	swa; dec-1; Cp7Fb; Cp36; wisp; toc; BicC; osk; cup; CG42388
embryo	GO:0030707	9.10567e-07	17.8677	0.57136	7	323	ovarian follicle cell development	1.38204e-05	8	dec-1; Cp7Fb; Cp36; toc; BicC; cup; CG42388
embryo	GO:0002066	9.29675e-07	17.8099	0.573129	7	324	columnar/cuboidal epithelial cell development	1.38204e-05	8	dec-1; Cp7Fb; Cp36; toc; BicC; cup; CG42388
embryo	GO:0002065	1.05155e-06	17.4704	0.583742	7	330	columnar/cuboidal epithelial cell differentiation	1.38204e-05	8	dec-1; Cp7Fb; Cp36; toc; BicC; cup; CG42388
embryo	GO:0046011	1.35836e-06	195.868	0.0229959	3	13	regulation of oskar mRNA translation	1.43468e-05	8	BicC; osk; cup
embryo	GO:0019953	1.54794e-06	9.52119	2.10678	11	1191	sexual reproduction	1.43468e-05	8	png; swa; dec-1; Cp7Fb; Cp36; wisp; toc; BicC; osk; cup; CG42388
embryo	GO:0002064	1.55943e-06	16.4245	0.61912	7	350	epithelial cell development	1.43468e-05	8	dec-1; Cp7Fb; Cp36; toc; BicC; cup; CG42388
embryo	GO:0044703	1.7833e-06	9.37176	2.13685	11	1208	multi-organism reproductive process	1.49149e-05	8	png; swa; dec-1; Cp7Fb; Cp36; wisp; toc; BicC; osk; cup; CG42388
embryo	GO:0022412	1.94566e-06	10.0685	1.69639	10	959	cellular process involved in reproduction in multicellular organism	1.49167e-05	8	swa; dec-1; Cp7Fb; Cp36; wisp; toc; BicC; osk; cup; CG42388
embryo	GO:0003006	2.72392e-06	9.67005	1.76007	10	995	developmental process involved in reproduction	1.9277e-05	8	swa; dec-1; Cp7Fb; Cp36; wisp; toc; BicC; osk; cup; CG42388
embryo	GO:0022414	3.00345e-06	8.83756	2.25183	11	1273	reproductive process	1.97369e-05	8	png; swa; dec-1; Cp7Fb; Cp36; wisp; toc; BicC; osk; cup; CG42388
embryo	GO:0000003	3.64543e-06	8.18752	2.8285	12	1599	reproduction	2.08603e-05	8	png; dhd; swa; dec-1; Cp7Fb; Cp36; wisp; toc; BicC; osk; cup; CG42388
embryo	GO:0007276	3.73011e-06	9.30964	1.82198	10	1030	gamete generation	2.08603e-05	8	swa; dec-1; Cp7Fb; Cp36; wisp; toc; BicC; osk; cup; CG42388
embryo	GO:0030855	3.85462e-06	14.2381	0.709335	7	401	epithelial cell differentiation	2.08603e-05	8	dec-1; Cp7Fb; Cp36; toc; BicC; cup; CG42388
embryo	GO:0048609	1.14827e-05	8.10861	2.06432	10	1167	multicellular organismal reproductive process	5.86892e-05	8	swa; dec-1; Cp7Fb; Cp36; wisp; toc; BicC; osk; cup; CG42388
embryo	GO:0051704	1.91041e-05	7.13032	2.72059	11	1538	multi-organism process	9.25043e-05	8	png; swa; dec-1; Cp7Fb; Cp36; wisp; toc; BicC; osk; cup; CG42388
embryo	GO:0008298	2.01683e-05	30.4321	0.166278	4	94	intracellular mRNA localization	9.2774e-05	8	swa; wisp; osk; cup
embryo	GO:0032504	4.63869e-05	6.79071	2.41811	10	1367	multicellular organism reproduction	0.000203219	8	swa; dec-1; Cp7Fb; Cp36; wisp; toc; BicC; osk; cup; CG42388
embryo	GO:0000226	7.77971e-05	10.5794	0.762403	6	431	microtubule cytoskeleton organization	0.000325333	8	wisp; toc; BicC; osk; stg; cup
embryo	GO:0007319	8.31015e-05	206.817	0.0141513	2	8	negative regulation of oskar mRNA translation	0.000332406	8	BicC; cup
embryo	GO:0034248	9.34735e-05	20.214	0.245879	4	139	regulation of cellular amide metabolic process	0.000358315	8	wisp; BicC; osk; cup
embryo	GO:0007010	0.000113001	8.19352	1.19579	7	676	cytoskeleton organization	0.000415843	8	swa; wisp; toc; BicC; osk; stg; cup
embryo	GO:0006403	0.000157225	17.5771	0.281258	4	159	RNA localization	0.000556336	8	swa; wisp; osk; cup
embryo	GO:0000280	0.000174376	9.06846	0.882689	6	499	nuclear division	0.000594169	8	dhd; wisp; toc; BicC; stg; cup
embryo	GO:0048599	0.000198801	16.4983	0.298947	4	169	oocyte development	0.000643382	8	swa; wisp; osk; cup
embryo	GO:0048285	0.000202805	8.80769	0.907454	6	513	organelle fission	0.000643382	8	dhd; wisp; toc; BicC; stg; cup
embryo	GO:0048468	0.000244623	5.43687	2.9364	10	1660	cell development	0.000726118	8	swa; dec-1; Cp7Fb; Cp36; wisp; toc; BicC; osk; cup; CG42388
embryo	GO:0007316	0.00026474	28.2517	0.127362	3	72	pole plasm RNA localization	0.000726118	8	swa; osk; cup
embryo	GO:0019094	0.00026474	28.2517	0.127362	3	72	pole plasm mRNA localization	0.000726118	8	swa; osk; cup
embryo	GO:0007017	0.000267992	8.3434	0.955214	6	540	microtubule-based process	0.000726118	8	wisp; toc; BicC; osk; stg; cup
embryo	GO:0007343	0.000268348	103.358	0.0247648	2	14	egg activation	0.000726118	8	png; wisp
embryo	GO:0009994	0.000304983	14.6907	0.334325	4	189	oocyte differentiation	0.000790435	8	swa; wisp; osk; cup
embryo	GO:0001775	0.000309301	95.4	0.0265337	2	15	cell activation	0.000790435	8	png; wisp
embryo	GO:0048469	0.000323845	14.4527	0.339632	4	192	cell maturation	0.000805237	8	swa; wisp; osk; cup
embryo	GO:0060811	0.000335386	25.9789	0.137975	3	78	intracellular mRNA localization involved in anterior/posterior axis specification	0.000811987	8	swa; osk; cup
embryo	GO:0007315	0.000361379	25.3001	0.141513	3	80	pole plasm assembly	0.000852483	8	swa; osk; cup
embryo	GO:0060810	0.000374848	24.9737	0.143282	3	81	intracellular mRNA localization involved in pattern specification process	0.000862151	8	swa; osk; cup
embryo	GO:0007143	0.000431956	23.7478	0.150358	3	85	female meiotic division	0.000969268	8	dhd; wisp; cup
embryo	GO:0045995	0.000462493	23.1786	0.153896	3	87	regulation of embryonic development	0.00101308	8	swa; stg; cup
embryo	GO:0007028	0.000478268	22.904	0.155665	3	88	cytoplasm organization	0.00102327	8	swa; osk; cup
embryo	GO:0021700	0.000533294	12.6098	0.387392	4	219	developmental maturation	0.00111507	8	swa; wisp; osk; cup
embryo	GO:0006417	0.000562337	21.6228	0.164509	3	93	regulation of translation	0.00114967	8	BicC; osk; cup
embryo	GO:0007314	0.000779263	19.2507	0.183967	3	104	oocyte anterior/posterior axis specification	0.00155853	8	swa; osk; cup
embryo	GO:0022607	0.00086196	5.7364	1.66455	7	941	cellular component assembly	0.0016668	8	swa; dec-1; Cp36; wisp; osk; stg; cup
embryo	GO:0008358	0.000869636	18.5113	0.191043	3	108	maternal determination of anterior/posterior axis, embryo	0.0016668	8	swa; osk; cup
embryo	GO:0009888	0.000896966	5.14056	2.21114	8	1250	tissue development	0.0016841	8	dec-1; Cp7Fb; Cp36; toc; BicC; stg; cup; CG42388
embryo	GO:0007049	0.00109113	5.4939	1.73177	7	979	cell cycle	0.00200767	8	png; dhd; wisp; toc; BicC; stg; cup
embryo	GO:0007317	0.00117816	45.8815	0.0512985	2	29	regulation of pole plasm oskar mRNA localization	0.00207158	8	swa; cup
embryo	GO:0030154	0.0012371	4.15573	4.27901	11	2419	cell differentiation	0.00207158	8	swa; dec-1; Cp7Fb; Cp36; wisp; toc; BicC; osk; stg; cup; CG42388
embryo	GO:0060281	0.00126096	44.2393	0.0530675	2	30	regulation of oocyte development	0.00207158	8	swa; cup
embryo	GO:1902875	0.00126096	44.2393	0.0530675	2	30	regulation of embryonic pattern specification	0.00207158	8	swa; cup
embryo	GO:1903429	0.00126096	44.2393	0.0530675	2	30	regulation of cell maturation	0.00207158	8	swa; cup
embryo	GO:1904580	0.00126096	44.2393	0.0530675	2	30	regulation of intracellular mRNA localization	0.00207158	8	swa; cup
embryo	GO:1902589	0.00134645	4.79896	2.35089	8	1329	single-organism organelle organization	0.00217322	8	dhd; swa; wisp; toc; BicC; osk; stg; cup
embryo	GO:0044085	0.00142279	5.23015	1.81137	7	1024	cellular component biogenesis	0.00225683	8	swa; dec-1; Cp36; wisp; osk; stg; cup
embryo	GO:0048869	0.00175458	3.95016	4.4559	11	2519	cellular developmental process	0.00273595	8	swa; dec-1; Cp7Fb; Cp36; wisp; toc; BicC; osk; stg; cup; CG42388
embryo	GO:0010608	0.00183797	14.1506	0.247648	3	140	posttranscriptional regulation of gene expression	0.00281821	8	BicC; osk; cup
embryo	GO:0007304	0.00191407	13.9447	0.251186	3	142	chorion-containing eggshell formation	0.00288679	8	dec-1; Cp7Fb; Cp36
embryo	GO:0030703	0.00199211	13.7447	0.254724	3	144	eggshell formation	0.00290441	8	dec-1; Cp7Fb; Cp36
embryo	GO:0043900	0.00199211	13.7447	0.254724	3	144	regulation of multi-organism process	0.00290441	8	swa; wisp; cup
embryo	GO:0007338	0.00202046	34.3861	0.0672188	2	38	single fertilization	0.00290441	8	png; wisp
embryo	GO:0009566	0.00212739	33.4541	0.0689877	2	39	fertilization	0.00300272	8	png; wisp
embryo	GO:0007309	0.00215413	13.3612	0.261799	3	148	oocyte axis specification	0.00300272	8	swa; osk; cup
embryo	GO:0007308	0.00232415	12.9982	0.268875	3	152	oocyte construction	0.00319137	8	swa; osk; cup
embryo	GO:0060429	0.002562	4.67869	2.00418	7	1133	epithelium development	0.00346624	8	dec-1; Cp7Fb; Cp36; toc; BicC; cup; CG42388
embryo	GO:0022402	0.00262844	5.24774	1.47528	6	834	cell cycle process	0.00350459	8	dhd; wisp; toc; BicC; stg; cup
embryo	GO:0017148	0.00282408	28.7721	0.0796012	2	45	negative regulation of translation	0.00371165	8	BicC; cup
embryo	GO:0045448	0.0029493	28.1159	0.0813701	2	46	mitotic cell cycle, embryonic	0.00382162	8	toc; stg
embryo	GO:0007351	0.003087	11.7225	0.297178	3	168	tripartite regional subdivision	0.00386935	8	swa; osk; cup
embryo	GO:0008595	0.003087	11.7225	0.297178	3	168	anterior/posterior axis specification, embryo	0.00386935	8	swa; osk; cup
embryo	GO:0044763	0.00311231	3.95127	10.1872	17	5759	single-organism cellular process	0.00386935	8	png; Xpac; dhd; swa; dec-1; Cp7Fb; Cp36; wisp; CG4991; toc; BicC; tos; osk; Men; stg; cup; CG42388
embryo	GO:0034249	0.00334035	26.3149	0.0866769	2	49	negative regulation of cellular amide metabolic process	0.00405942	8	BicC; cup
embryo	GO:0000578	0.00335343	11.3731	0.306022	3	173	embryonic axis specification	0.00405942	8	swa; osk; cup
embryo	GO:0009948	0.00340836	11.3056	0.307791	3	174	anterior/posterior axis specification	0.00407233	8	swa; osk; cup
embryo	GO:0016043	0.00387	3.50472	4.89459	11	2767	cellular component organization	0.00456461	8	dhd; swa; dec-1; Cp36; wisp; toc; BicC; osk; stg; cup; CG42388
embryo	GO:0000278	0.00418167	5.5576	1.11265	5	629	mitotic cell cycle	0.00486979	8	png; wisp; toc; BicC; stg
embryo	GO:0048646	0.00444375	5.4744	1.12857	5	638	anatomical structure formation involved in morphogenesis	0.00511031	8	dec-1; Cp7Fb; Cp36; osk; CG42388
embryo	GO:0071840	0.00469894	3.39936	5.01134	11	2833	cellular component organization or biogenesis	0.00533707	8	dhd; swa; dec-1; Cp36; wisp; toc; BicC; osk; stg; cup; CG42388
embryo	GO:0009790	0.00477996	5.37587	1.14803	5	649	embryo development	0.00536289	8	swa; toc; osk; stg; cup
embryo	GO:2000241	0.00529717	20.5917	0.109673	2	62	regulation of reproductive process	0.00587156	8	swa; cup
embryo	GO:0009952	0.00592095	9.22135	0.37501	3	212	anterior/posterior pattern specification	0.00646728	8	swa; osk; cup
embryo	GO:0070727	0.00603085	6.33096	0.751789	4	425	cellular macromolecule localization	0.00646728	8	swa; wisp; osk; cup
embryo	GO:0044767	0.0060455	3.20859	6.8404	13	3867	single-organism developmental process	0.00646728	8	dhd; swa; dec-1; Cp7Fb; Cp36; wisp; toc; BicC; osk; Men; stg; cup; CG42388
embryo	GO:0045451	0.00634051	18.7106	0.120286	2	68	pole plasm oskar mRNA localization	0.0067049	8	swa; cup
embryo	GO:0032502	0.00669442	3.15842	6.91469	13	3909	developmental process	0.00699871	8	dhd; swa; dec-1; Cp7Fb; Cp36; wisp; toc; BicC; osk; Men; stg; cup; CG42388
embryo	GO:0007350	0.00871941	7.97598	0.431615	3	244	blastoderm segmentation	0.00891162	8	swa; osk; cup
embryo	GO:0048856	0.00874375	3.03479	6.24427	12	3530	anatomical structure development	0.00891162	8	dhd; swa; dec-1; Cp7Fb; Cp36; wisp; toc; BicC; osk; stg; cup; CG42388
embryo	GO:0040019	0.00881475	147.75	0.00884458	1	5	positive regulation of embryonic development	0.00891162	8	stg
embryo	GO:0009798	0.00921603	7.81065	0.44046	3	249	axis specification	0.00921603	8	swa; osk; cup
embryo	GO:0007049	5.41269e-18	11.3213	5.03787	31	979	cell cycle	1.89444e-15	9	CDC45L; mei-9; Caf1-180; mr; msd1; pav; sti; Grip163; E(z); pbl; Mad; Grip75; Orc5; brat; Orc2; spn-E; CG13599; Apc2; BRWD3; l(3)mbt; Slbp; dgt6; sub; Ercc1; Mat1; Sep5; scra; tefu; dgt3; Cap-G; SMC5
embryo	GO:0000278	1.18733e-17	13.3552	3.23679	26	629	mitotic cell cycle	2.07783e-15	9	CDC45L; mei-9; msd1; pav; sti; Grip163; E(z); pbl; Mad; Grip75; Orc5; Orc2; spn-E; CG13599; Apc2; BRWD3; l(3)mbt; Slbp; dgt6; sub; Sep5; scra; tefu; dgt3; Cap-G; SMC5
embryo	GO:1903047	8.42532e-17	13.5676	2.81997	24	548	mitotic cell cycle process	9.82954e-15	9	CDC45L; mei-9; msd1; pav; sti; Grip163; pbl; Mad; Grip75; Orc5; Orc2; spn-E; CG13599; Apc2; BRWD3; Slbp; dgt6; sub; Sep5; scra; tefu; dgt3; Cap-G; SMC5
embryo	GO:0022402	1.09467e-14	9.79319	4.29171	26	834	cell cycle process	9.57838e-13	9	CDC45L; mei-9; Caf1-180; msd1; pav; sti; Grip163; pbl; Mad; Grip75; Orc5; Orc2; spn-E; CG13599; Apc2; BRWD3; Slbp; dgt6; sub; Ercc1; Sep5; scra; tefu; dgt3; Cap-G; SMC5
embryo	GO:0051301	3.19695e-12	13.4604	1.62097	16	315	cell division	2.23786e-10	9	pav; sti; pbl; Mad; Grip75; brat; Cen; CG13599; Apc2; dgt6; sub; Sep5; scra; egg; dgt3; Cap-G
embryo	GO:0006259	8.74625e-12	13.8798	1.45115	15	282	DNA metabolic process	5.10198e-10	9	CDC45L; mei-9; Caf1-180; cutlet; Nse1; Orc5; Ku80; Su(var)3-7; Orc2; spn-E; Ercc1; Gasz; tefu; egg; SMC5
embryo	GO:0000280	3.48203e-11	9.67441	2.56782	18	499	nuclear division	1.74101e-09	9	mei-9; pav; sti; Grip163; pbl; Grip75; Orc5; Orc2; spn-E; CG13599; Slbp; dgt6; sub; Ercc1; scra; dgt3; Cap-G; SMC5
embryo	GO:0048285	5.49257e-11	9.38972	2.63986	18	513	organelle fission	2.403e-09	9	mei-9; pav; sti; Grip163; pbl; Grip75; Orc5; Orc2; spn-E; CG13599; Slbp; dgt6; sub; Ercc1; scra; dgt3; Cap-G; SMC5
embryo	GO:1902589	7.78133e-11	6.20494	6.83895	27	1329	single-organism organelle organization	3.02607e-09	9	CDC45L; mei-9; msd1; pav; fu; Su(var)3-3; sti; Grip163; E(z); pbl; Grip75; Orc5; Ku80; Orc2; spn-E; CG13599; Apc2; Slbp; dgt6; sub; Ercc1; scra; tefu; egg; dgt3; Cap-G; SMC5
embryo	GO:0016043	1.4769e-10	5.16492	14.2388	38	2767	cellular component organization	5.16914e-09	9	CDC45L; mei-9; Caf1-180; mr; msd1; pav; fu; Su(var)3-3; sti; Grip163; E(z); Gem3; nmo; pbl; Mad; psd; Grip75; Orc5; Ku80; brat; Su(var)3-7; Orc2; spn-E; CG13599; Apc2; l(3)mbt; Slbp; dgt6; d4; sub; Ercc1; Caf1-105; scra; tefu; egg; dgt3; Cap-G; SMC5
embryo	GO:0051726	2.18313e-10	10.8669	1.82166	15	354	regulation of cell cycle	6.94633e-09	9	CDC45L; mei-9; mr; sti; Mad; brat; CG13599; BRWD3; l(3)mbt; dgt6; sub; Sep5; scra; tefu; dgt3
embryo	GO:0044763	2.85022e-10	6.31152	29.6354	54	5759	single-organism cellular process	8.25496e-09	9	Roc1a; CDC45L; mei-9; Caf1-180; CG6613; apt; mr; msd1; pav; fu; Su(var)3-3; sti; Grip163; E(z); Gem3; nmo; pbl; Mad; Ipk2; MED27; psd; Nse1; CG7840; Grip75; Orc5; Ku80; brat; Cen; Su(var)3-7; Orc2; spn-E; CG13599; Apc2; BRWD3; l(3)mbt; Slbp; dgt6; d4; sub; Ercc1; Mat1; Caf1-105; Gasz; Sep5; scra; CG1677; elg1; tefu; egg; dgt3; Cap-G; SMC5; SoYb; sno
embryo	GO:0071840	3.06613e-10	5.00845	14.5784	38	2833	cellular component organization or biogenesis	8.25496e-09	9	CDC45L; mei-9; Caf1-180; mr; msd1; pav; fu; Su(var)3-3; sti; Grip163; E(z); Gem3; nmo; pbl; Mad; psd; Grip75; Orc5; Ku80; brat; Su(var)3-7; Orc2; spn-E; CG13599; Apc2; l(3)mbt; Slbp; dgt6; d4; sub; Ercc1; Caf1-105; scra; tefu; egg; dgt3; Cap-G; SMC5
embryo	GO:0007067	6.62531e-10	12.3104	1.35853	13	264	mitotic nuclear division	1.65633e-08	9	pav; Grip163; Grip75; Orc5; Orc2; spn-E; CG13599; Slbp; dgt6; sub; dgt3; Cap-G; SMC5
embryo	GO:0006996	8.27536e-10	5.18621	9.41192	30	1829	organelle organization	1.93092e-08	9	CDC45L; mei-9; Caf1-180; msd1; pav; fu; Su(var)3-3; sti; Grip163; E(z); pbl; Grip75; Orc5; Ku80; Su(var)3-7; Orc2; spn-E; CG13599; Apc2; Slbp; dgt6; sub; Ercc1; Caf1-105; scra; tefu; egg; dgt3; Cap-G; SMC5
embryo	GO:0090304	1.14932e-09	5.19488	8.90761	29	1731	nucleic acid metabolic process	2.51413e-08	9	CDC45L; mei-9; Caf1-180; apt; fu; Su(var)3-3; E(z); cutlet; Mad; MED27; Nse1; Orc5; Ku80; brat; Su(var)3-7; Orc2; spn-E; Apc2; l(3)mbt; Slbp; d4; Ercc1; Mat1; Gasz; CG1677; tefu; egg; SMC5; sno
embryo	GO:0044699	1.49386e-09	9.79228	38.8312	60	7546	single-organism process	3.07559e-08	9	Roc1a; CDC45L; tyf; mei-9; Caf1-180; CG6613; apt; mr; msd1; pav; hang; fu; Su(var)3-3; CG5235; sti; Grip163; E(z); Gem3; nmo; pbl; cutlet; Mad; Ipk2; MED27; psd; Nse1; CG7840; Grip75; Orc5; Ku80; brat; Cen; Su(var)3-7; Orc2; spn-E; CG13599; Apc2; BRWD3; l(3)mbt; Slbp; dgt6; d4; CG13427; sub; Ercc1; Mat1; Caf1-105; Gasz; Sep5; scra; nxf2; CG1677; elg1; tefu; egg; dgt3; Cap-G; SMC5; SoYb; sno
embryo	GO:0050794	2.14064e-09	4.60475	15.5356	38	3019	regulation of cellular process	4.16235e-08	9	Roc1a; CDC45L; tyf; mei-9; CG6613; apt; mr; pav; fu; Su(var)3-3; sti; E(z); nmo; pbl; Mad; Ipk2; MED27; Nse1; Orc5; brat; Su(var)3-7; Orc2; spn-E; CG13599; Apc2; BRWD3; l(3)mbt; dgt6; d4; sub; Caf1-105; Sep5; scra; tefu; egg; dgt3; SoYb; sno
embryo	GO:0051276	3.56378e-09	7.54526	3.00008	17	583	chromosome organization	6.56487e-08	9	CDC45L; Caf1-180; Su(var)3-3; sti; E(z); Orc5; Ku80; Su(var)3-7; Orc2; spn-E; Slbp; sub; Caf1-105; tefu; egg; Cap-G; SMC5
embryo	GO:0010564	6.14272e-09	13.0981	1.04977	11	204	regulation of cell cycle process	1.07498e-07	9	CDC45L; mei-9; sti; Mad; CG13599; BRWD3; dgt6; sub; scra; tefu; dgt3
embryo	GO:0098813	6.50507e-09	15.4019	0.807912	10	157	nuclear chromosome segregation	1.08418e-07	9	mei-9; pav; Orc5; Orc2; spn-E; Slbp; sub; Ercc1; Cap-G; SMC5
embryo	GO:0048523	9.94227e-09	5.54463	5.60907	22	1090	negative regulation of cellular process	1.58172e-07	9	Roc1a; CDC45L; mei-9; apt; mr; fu; E(z); nmo; pbl; Mad; MED27; Orc5; brat; Su(var)3-7; Orc2; spn-E; Apc2; BRWD3; l(3)mbt; tefu; egg; SoYb
embryo	GO:0043933	1.44163e-08	5.62146	5.19739	21	1010	macromolecular complex subunit organization	2.19379e-07	9	Caf1-180; msd1; pav; Su(var)3-3; sti; Grip163; E(z); Gem3; pbl; Grip75; Orc5; Su(var)3-7; Orc2; spn-E; dgt6; sub; Caf1-105; tefu; egg; dgt3; Cap-G
embryo	GO:0048519	1.86662e-08	5.16588	6.35523	23	1235	negative regulation of biological process	2.72216e-07	9	Roc1a; CDC45L; mei-9; apt; mr; fu; Su(var)3-3; E(z); nmo; pbl; Mad; MED27; Orc5; brat; Su(var)3-7; Orc2; spn-E; Apc2; BRWD3; l(3)mbt; tefu; egg; SoYb
embryo	GO:0007059	2.17472e-08	13.4535	0.915977	10	178	chromosome segregation	2.94023e-07	9	mei-9; pav; Orc5; Orc2; spn-E; Slbp; sub; Ercc1; Cap-G; SMC5
embryo	GO:0006323	2.18417e-08	16.2971	0.679263	9	132	DNA packaging	2.94023e-07	9	CDC45L; Caf1-180; Orc5; Su(var)3-7; Orc2; spn-E; Slbp; Caf1-105; Cap-G
embryo	GO:0050789	2.96685e-08	4.08558	16.9713	38	3298	regulation of biological process	3.84591e-07	9	Roc1a; CDC45L; tyf; mei-9; CG6613; apt; mr; pav; fu; Su(var)3-3; sti; E(z); nmo; pbl; Mad; Ipk2; MED27; Nse1; Orc5; brat; Su(var)3-7; Orc2; spn-E; CG13599; Apc2; BRWD3; l(3)mbt; dgt6; d4; sub; Caf1-105; Sep5; scra; tefu; egg; dgt3; SoYb; sno
embryo	GO:0000281	3.75693e-08	26.0753	0.334486	7	65	mitotic cytokinesis	4.69616e-07	9	pav; sti; pbl; Apc2; Sep5; scra; Cap-G
embryo	GO:0071103	4.66444e-08	14.8339	0.741015	9	144	DNA conformation change	5.62949e-07	9	CDC45L; Caf1-180; Orc5; Su(var)3-7; Orc2; spn-E; Slbp; Caf1-105; Cap-G
embryo	GO:0006139	5.42656e-08	4.26175	10.5131	29	2043	nucleobase-containing compound metabolic process	6.33099e-07	9	CDC45L; mei-9; Caf1-180; apt; fu; Su(var)3-3; E(z); cutlet; Mad; MED27; Nse1; Orc5; Ku80; brat; Su(var)3-7; Orc2; spn-E; Apc2; l(3)mbt; Slbp; d4; Ercc1; Mat1; Gasz; CG1677; tefu; egg; SMC5; sno
embryo	GO:0007051	6.96225e-08	10.1891	1.32765	11	258	spindle organization	7.86061e-07	9	msd1; pav; Grip163; pbl; Grip75; Orc5; Orc2; dgt6; sub; dgt3; Cap-G
embryo	GO:0061640	7.3606e-08	17.5329	0.555761	8	108	cytoskeleton-dependent cytokinesis	8.05066e-07	9	pav; sti; pbl; Grip75; Apc2; Sep5; scra; Cap-G
embryo	GO:0065007	8.81312e-08	3.87715	18.4688	39	3589	biological regulation	9.34725e-07	9	Roc1a; CDC45L; tyf; mei-9; CG6613; apt; mr; pav; fu; Su(var)3-3; sti; E(z); nmo; pbl; Mad; Ipk2; MED27; Nse1; Orc5; Ku80; brat; Su(var)3-7; Orc2; spn-E; CG13599; Apc2; BRWD3; l(3)mbt; dgt6; d4; sub; Caf1-105; Sep5; scra; tefu; egg; dgt3; SoYb; sno
embryo	GO:0000910	9.78354e-08	16.853	0.576345	8	112	cytokinesis	1.00713e-06	9	pav; sti; pbl; Grip75; Apc2; Sep5; scra; Cap-G
embryo	GO:0030261	1.01746e-07	32.7162	0.231567	6	45	chromosome condensation	1.01746e-06	9	CDC45L; Orc5; Orc2; spn-E; Slbp; Cap-G
embryo	GO:0007076	1.21313e-07	55.1026	0.123502	5	24	mitotic chromosome condensation	1.17944e-06	9	Orc5; Orc2; spn-E; Slbp; Cap-G
embryo	GO:0046483	1.4451e-07	4.0417	10.9814	29	2134	heterocycle metabolic process	1.36699e-06	9	CDC45L; mei-9; Caf1-180; apt; fu; Su(var)3-3; E(z); cutlet; Mad; MED27; Nse1; Orc5; Ku80; brat; Su(var)3-7; Orc2; spn-E; Apc2; l(3)mbt; Slbp; d4; Ercc1; Mat1; Gasz; CG1677; tefu; egg; SMC5; sno
embryo	GO:0007052	1.67781e-07	10.674	1.13725	10	221	mitotic spindle organization	1.54535e-06	9	msd1; pav; Grip163; Grip75; Orc5; Orc2; dgt6; sub; dgt3; Cap-G
embryo	GO:0007346	1.74996e-07	10.6228	1.1424	10	222	regulation of mitotic cell cycle	1.57048e-06	9	CDC45L; mei-9; Mad; CG13599; BRWD3; l(3)mbt; dgt6; sub; tefu; dgt3
embryo	GO:0006725	2.09597e-07	3.95981	11.1667	29	2170	cellular aromatic compound metabolic process	1.83398e-06	9	CDC45L; mei-9; Caf1-180; apt; fu; Su(var)3-3; E(z); cutlet; Mad; MED27; Nse1; Orc5; Ku80; brat; Su(var)3-7; Orc2; spn-E; Apc2; l(3)mbt; Slbp; d4; Ercc1; Mat1; Gasz; CG1677; tefu; egg; SMC5; sno
embryo	GO:0000226	2.27808e-07	7.29032	2.2179	13	431	microtubule cytoskeleton organization	1.9447e-06	9	msd1; pav; Grip163; pbl; Grip75; Orc5; Orc2; Apc2; dgt6; sub; scra; dgt3; Cap-G
embryo	GO:0006281	3.92422e-07	13.8855	0.689555	8	134	DNA repair	3.27018e-06	9	mei-9; Caf1-180; Nse1; Ku80; Ercc1; Gasz; tefu; SMC5
embryo	GO:0000070	4.24105e-07	17.7536	0.473426	7	92	mitotic sister chromatid segregation	3.45202e-06	9	Orc5; Orc2; spn-E; Slbp; sub; Cap-G; SMC5
embryo	GO:1901360	4.3422e-07	3.80192	11.5423	29	2243	organic cyclic compound metabolic process	3.45402e-06	9	CDC45L; mei-9; Caf1-180; apt; fu; Su(var)3-3; E(z); cutlet; Mad; MED27; Nse1; Orc5; Ku80; brat; Su(var)3-7; Orc2; spn-E; Apc2; l(3)mbt; Slbp; d4; Ercc1; Mat1; Gasz; CG1677; tefu; egg; SMC5; sno
embryo	GO:0007017	4.61286e-07	6.30639	2.77881	14	540	microtubule-based process	3.58778e-06	9	msd1; pav; fu; Grip163; pbl; Grip75; Orc5; Orc2; Apc2; dgt6; sub; scra; dgt3; Cap-G
embryo	GO:0000819	7.00684e-07	16.3934	0.509448	7	99	sister chromatid segregation	5.33129e-06	9	Orc5; Orc2; spn-E; Slbp; sub; Cap-G; SMC5
embryo	GO:0022607	7.20017e-07	4.85421	4.84233	18	941	cellular component assembly	5.36183e-06	9	Caf1-180; mr; msd1; pav; sti; Gem3; nmo; pbl; Mad; psd; Grip75; brat; Su(var)3-7; Orc2; spn-E; dgt6; sub; Caf1-105
embryo	GO:0009987	1.07153e-06	5.05834	39.5671	57	7689	cellular process	7.81325e-06	9	Roc1a; CDC45L; CG2924; tyf; mei-9; Caf1-180; CG6613; apt; mr; msd1; pav; fu; Su(var)3-3; sti; Grip163; E(z); Gem3; nmo; pbl; cutlet; Mad; Ipk2; MED27; psd; Nse1; CG7840; Grip75; Orc5; Ku80; brat; Cen; Su(var)3-7; Orc2; spn-E; CG13599; Apc2; BRWD3; l(3)mbt; Slbp; dgt6; d4; sub; Ercc1; Mat1; Caf1-105; Gasz; Sep5; scra; CG1677; elg1; tefu; egg; dgt3; Cap-G; SMC5; SoYb; sno
embryo	GO:0051716	1.17111e-06	3.82235	9.27298	25	1802	cellular response to stimulus	8.36506e-06	9	Roc1a; CDC45L; mei-9; Caf1-180; CG6613; apt; pav; fu; Su(var)3-3; sti; nmo; pbl; Mad; Ipk2; MED27; Nse1; Ku80; Apc2; BRWD3; Ercc1; Caf1-105; Gasz; tefu; SMC5; sno
embryo	GO:0006351	1.84493e-06	4.51905	5.16652	18	1004	transcription, DNA-templated	1.26613e-05	9	apt; fu; Su(var)3-3; E(z); Mad; MED27; Orc5; brat; Su(var)3-7; Orc2; spn-E; Apc2; l(3)mbt; d4; Mat1; tefu; egg; sno
embryo	GO:0097659	1.84493e-06	4.51905	5.16652	18	1004	nucleic acid-templated transcription	1.26613e-05	9	apt; fu; Su(var)3-3; E(z); Mad; MED27; Orc5; brat; Su(var)3-7; Orc2; spn-E; Apc2; l(3)mbt; d4; Mat1; tefu; egg; sno
embryo	GO:0032774	1.92582e-06	4.50415	5.18196	18	1007	RNA biosynthetic process	1.29622e-05	9	apt; fu; Su(var)3-3; E(z); Mad; MED27; Orc5; brat; Su(var)3-7; Orc2; spn-E; Apc2; l(3)mbt; d4; Mat1; tefu; egg; sno
embryo	GO:0006310	2.23063e-06	18.4468	0.385945	6	75	DNA recombination	1.47306e-05	9	mei-9; Caf1-180; Ku80; spn-E; Ercc1; SMC5
embryo	GO:0006974	2.2917e-06	7.88276	1.51291	10	294	cellular response to DNA damage stimulus	1.48536e-05	9	CDC45L; mei-9; Caf1-180; Nse1; Ku80; BRWD3; Ercc1; Gasz; tefu; SMC5
embryo	GO:0044085	2.44835e-06	4.42143	5.26944	18	1024	cellular component biogenesis	1.55804e-05	9	Caf1-180; mr; msd1; pav; sti; Gem3; nmo; pbl; Mad; psd; Grip75; brat; Su(var)3-7; Orc2; spn-E; dgt6; sub; Caf1-105
embryo	GO:0034654	3.18045e-06	4.17651	5.94356	19	1155	nucleobase-containing compound biosynthetic process	1.98778e-05	9	CDC45L; apt; fu; Su(var)3-3; E(z); Mad; MED27; Orc5; brat; Su(var)3-7; Orc2; spn-E; Apc2; l(3)mbt; d4; Mat1; tefu; egg; sno
embryo	GO:2000112	3.31518e-06	4.31843	5.38265	18	1046	regulation of cellular macromolecule biosynthetic process	2.03564e-05	9	tyf; apt; fu; Su(var)3-3; E(z); Mad; MED27; Orc5; brat; Su(var)3-7; Orc2; spn-E; Apc2; l(3)mbt; d4; tefu; egg; sno
embryo	GO:0010556	3.40639e-06	4.30929	5.39294	18	1048	regulation of macromolecule biosynthetic process	2.05558e-05	9	tyf; apt; fu; Su(var)3-3; E(z); Mad; MED27; Orc5; brat; Su(var)3-7; Orc2; spn-E; Apc2; l(3)mbt; d4; tefu; egg; sno
embryo	GO:0048468	3.96633e-06	3.67907	8.54225	23	1660	cell development	2.33172e-05	9	Roc1a; CDC45L; apt; fu; Su(var)3-3; E(z); pbl; Mad; MED27; psd; Grip75; brat; Orc2; spn-E; Apc2; BRWD3; l(3)mbt; d4; Ercc1; elg1; tefu; egg; Cap-G
embryo	GO:0006302	3.99724e-06	24.881	0.241859	5	47	double-strand break repair	2.33172e-05	9	mei-9; Caf1-180; Ku80; tefu; SMC5
embryo	GO:0048477	4.59873e-06	4.8262	3.87489	15	753	oogenesis	2.63862e-05	9	apt; fu; Su(var)3-3; pbl; Mad; psd; Grip75; brat; Orc2; spn-E; Apc2; elg1; tefu; egg; Cap-G
embryo	GO:0007292	5.23215e-06	4.77116	3.91606	15	761	female gamete generation	2.95363e-05	9	apt; fu; Su(var)3-3; pbl; Mad; psd; Grip75; brat; Orc2; spn-E; Apc2; elg1; tefu; egg; Cap-G
embryo	GO:0010468	5.32281e-06	4.01631	6.15454	19	1196	regulation of gene expression	2.95712e-05	9	tyf; apt; fu; Su(var)3-3; E(z); Mad; MED27; Orc5; brat; Su(var)3-7; Orc2; spn-E; Apc2; BRWD3; l(3)mbt; d4; tefu; egg; sno
embryo	GO:0044260	5.73079e-06	3.12953	18.7261	36	3639	cellular macromolecule metabolic process	3.13403e-05	9	Roc1a; CDC45L; CG2924; tyf; mei-9; Caf1-180; apt; mr; fu; Su(var)3-3; sti; E(z); nmo; cutlet; Mad; MED27; Nse1; Orc5; Ku80; brat; Su(var)3-7; Orc2; spn-E; Apc2; l(3)mbt; Slbp; d4; sub; Ercc1; Mat1; Gasz; CG1677; tefu; egg; SMC5; sno
embryo	GO:0007010	6.52858e-06	4.95329	3.47865	14	676	cytoskeleton organization	3.51539e-05	9	msd1; pav; sti; Grip163; pbl; Grip75; Orc5; Orc2; Apc2; dgt6; sub; scra; dgt3; Cap-G
embryo	GO:0031326	6.82814e-06	4.07925	5.66568	18	1101	regulation of cellular biosynthetic process	3.6125e-05	9	tyf; apt; fu; Su(var)3-3; E(z); Mad; MED27; Orc5; brat; Su(var)3-7; Orc2; spn-E; Apc2; l(3)mbt; d4; tefu; egg; sno
embryo	GO:0009889	6.91537e-06	4.07512	5.67082	18	1102	regulation of biosynthetic process	3.6125e-05	9	tyf; apt; fu; Su(var)3-3; E(z); Mad; MED27; Orc5; brat; Su(var)3-7; Orc2; spn-E; Apc2; l(3)mbt; d4; tefu; egg; sno
embryo	GO:0048522	7.27922e-06	4.21899	5.11506	17	994	positive regulation of cellular process	3.68985e-05	9	CDC45L; tyf; apt; pav; fu; nmo; pbl; Mad; Ipk2; Nse1; Su(var)3-7; spn-E; Apc2; BRWD3; Caf1-105; scra; sno
embryo	GO:0019438	7.29003e-06	3.92038	6.28833	19	1222	aromatic compound biosynthetic process	3.68985e-05	9	CDC45L; apt; fu; Su(var)3-3; E(z); Mad; MED27; Orc5; brat; Su(var)3-7; Orc2; spn-E; Apc2; l(3)mbt; d4; Mat1; tefu; egg; sno
embryo	GO:0051302	7.37971e-06	14.7799	0.473426	6	92	regulation of cell division	3.68985e-05	9	sti; CG13599; dgt6; sub; scra; dgt3
embryo	GO:0030154	7.60074e-06	3.24708	12.448	28	2419	cell differentiation	3.74684e-05	9	Roc1a; CDC45L; apt; pav; fu; Su(var)3-3; E(z); pbl; Mad; MED27; psd; Grip75; Orc5; brat; Orc2; spn-E; Apc2; BRWD3; l(3)mbt; d4; Ercc1; Gasz; scra; CG1677; elg1; tefu; egg; Cap-G
embryo	GO:0018130	7.73657e-06	3.90241	6.31406	19	1227	heterocycle biosynthetic process	3.76083e-05	9	CDC45L; apt; fu; Su(var)3-3; E(z); Mad; MED27; Orc5; brat; Su(var)3-7; Orc2; spn-E; Apc2; l(3)mbt; d4; Mat1; tefu; egg; sno
embryo	GO:0065003	9.05336e-06	6.02542	2.17673	11	423	macromolecular complex assembly	4.34065e-05	9	Caf1-180; msd1; pav; Gem3; pbl; Grip75; Su(var)3-7; spn-E; dgt6; sub; Caf1-105
embryo	GO:0023051	1.14367e-05	4.69764	3.65361	14	710	regulation of signaling	5.40924e-05	9	Roc1a; apt; mr; pav; fu; Su(var)3-3; nmo; pbl; Ipk2; MED27; brat; Apc2; BRWD3; Caf1-105
embryo	GO:0010629	1.17682e-05	5.36787	2.68618	12	522	negative regulation of gene expression	5.44519e-05	9	apt; Su(var)3-3; E(z); Mad; Orc5; Su(var)3-7; Orc2; spn-E; Apc2; l(3)mbt; tefu; egg
embryo	GO:1903046	1.18238e-05	7.33515	1.43572	9	279	meiotic cell cycle process	5.44519e-05	9	mei-9; pav; sti; pbl; Grip75; sub; Ercc1; scra; tefu
embryo	GO:1901362	1.21663e-05	3.76716	6.51475	19	1266	organic cyclic compound biosynthetic process	5.53012e-05	9	CDC45L; apt; fu; Su(var)3-3; E(z); Mad; MED27; Orc5; brat; Su(var)3-7; Orc2; spn-E; Apc2; l(3)mbt; d4; Mat1; tefu; egg; sno
embryo	GO:0051321	1.28805e-05	7.25275	1.45115	9	282	meiotic cell cycle	5.77969e-05	9	mei-9; pav; sti; pbl; Grip75; sub; Ercc1; scra; tefu
embryo	GO:0045814	1.39669e-05	10.144	0.79762	7	155	negative regulation of gene expression, epigenetic	6.12741e-05	9	E(z); Orc5; Su(var)3-7; Orc2; spn-E; tefu; egg
embryo	GO:0010646	1.40455e-05	4.60638	3.72051	14	723	regulation of cell communication	6.12741e-05	9	Roc1a; apt; mr; pav; fu; Su(var)3-3; nmo; pbl; Ipk2; MED27; brat; Apc2; BRWD3; Caf1-105
embryo	GO:0016070	1.41806e-05	3.52133	7.86299	21	1528	RNA metabolic process	6.12741e-05	9	apt; fu; Su(var)3-3; E(z); Mad; MED27; Orc5; brat; Su(var)3-7; Orc2; spn-E; Apc2; l(3)mbt; Slbp; d4; Mat1; Gasz; CG1677; tefu; egg; sno
embryo	GO:0016458	1.59414e-05	8.19474	1.13211	8	220	gene silencing	6.80426e-05	9	Su(var)3-3; E(z); Orc5; Su(var)3-7; Orc2; spn-E; tefu; egg
embryo	GO:0044772	1.64851e-05	9.87385	0.818204	7	159	mitotic cell cycle phase transition	6.95156e-05	9	CDC45L; mei-9; Mad; CG13599; BRWD3; sub; tefu
embryo	GO:0048869	1.69091e-05	3.08551	12.9626	28	2519	cellular developmental process	6.96869e-05	9	Roc1a; CDC45L; apt; pav; fu; Su(var)3-3; E(z); pbl; Mad; MED27; psd; Grip75; Orc5; brat; Orc2; spn-E; Apc2; BRWD3; l(3)mbt; d4; Ercc1; Gasz; scra; CG1677; elg1; tefu; egg; Cap-G
embryo	GO:0006355	1.73222e-05	4.08717	4.88349	16	949	regulation of transcription, DNA-templated	6.96869e-05	9	apt; fu; Su(var)3-3; E(z); Mad; MED27; Orc5; Su(var)3-7; Orc2; spn-E; Apc2; l(3)mbt; d4; tefu; egg; sno
embryo	GO:1903506	1.73222e-05	4.08717	4.88349	16	949	regulation of nucleic acid-templated transcription	6.96869e-05	9	apt; fu; Su(var)3-3; E(z); Mad; MED27; Orc5; Su(var)3-7; Orc2; spn-E; Apc2; l(3)mbt; d4; tefu; egg; sno
embryo	GO:2001141	1.73222e-05	4.08717	4.88349	16	949	regulation of RNA biosynthetic process	6.96869e-05	9	apt; fu; Su(var)3-3; E(z); Mad; MED27; Orc5; Su(var)3-7; Orc2; spn-E; Apc2; l(3)mbt; d4; tefu; egg; sno
embryo	GO:0030178	1.80766e-05	30.484	0.159524	4	31	negative regulation of Wnt signaling pathway	7.18954e-05	9	Roc1a; nmo; pbl; Apc2
embryo	GO:0051171	1.86336e-05	3.76102	6.09279	18	1184	regulation of nitrogen compound metabolic process	7.32783e-05	9	tyf; apt; fu; Su(var)3-3; E(z); Mad; MED27; Orc5; brat; Su(var)3-7; Orc2; spn-E; Apc2; l(3)mbt; d4; tefu; egg; sno
embryo	GO:0044770	1.9368e-05	9.61752	0.838787	7	163	cell cycle phase transition	7.532e-05	9	CDC45L; mei-9; Mad; CG13599; BRWD3; sub; tefu
embryo	GO:0022412	1.9736e-05	4.0403	4.93495	16	959	cellular process involved in reproduction in multicellular organism	7.59077e-05	9	apt; fu; Su(var)3-3; pbl; Mad; psd; Grip75; brat; Orc2; spn-E; Apc2; scra; elg1; tefu; egg; Cap-G
embryo	GO:0051128	2.51511e-05	4.61975	3.39632	13	660	regulation of cellular component organization	9.56836e-05	9	mr; pav; sti; nmo; pbl; Mad; brat; Su(var)3-7; spn-E; CG13599; dgt6; sub; dgt3
embryo	GO:0071822	2.63786e-05	4.59725	3.41176	13	663	protein complex subunit organization	9.92743e-05	9	Caf1-180; msd1; pav; Grip163; pbl; Grip75; Orc5; Orc2; dgt6; sub; Caf1-105; dgt3; Cap-G
embryo	GO:0034641	2.70077e-05	2.93757	14.8615	30	2888	cellular nitrogen compound metabolic process	0.000100561	9	CDC45L; tyf; mei-9; Caf1-180; apt; fu; Su(var)3-3; E(z); cutlet; Mad; MED27; Nse1; Orc5; Ku80; brat; Su(var)3-7; Orc2; spn-E; Apc2; l(3)mbt; Slbp; d4; Ercc1; Mat1; Gasz; CG1677; tefu; egg; SMC5; sno
embryo	GO:0007281	2.81486e-05	4.09301	4.50784	15	876	germ cell development	0.000103706	9	apt; fu; Su(var)3-3; pbl; Mad; psd; Grip75; brat; Orc2; spn-E; Apc2; elg1; tefu; egg; Cap-G
embryo	GO:0000003	2.84898e-05	3.34092	8.22835	21	1599	reproduction	0.000103869	9	mei-9; apt; pav; fu; Su(var)3-3; sti; pbl; Mad; psd; Grip75; brat; Orc2; spn-E; Apc2; sub; Ercc1; scra; elg1; tefu; egg; Cap-G
embryo	GO:0030111	3.30297e-05	15.5654	0.370507	5	72	regulation of Wnt signaling pathway	0.000119179	9	Roc1a; pav; nmo; pbl; Apc2
embryo	GO:0043170	3.82581e-05	2.79744	22.0452	38	4284	macromolecule metabolic process	0.000136636	9	Roc1a; CDC45L; CG2924; tyf; mei-9; Caf1-180; apt; mr; fu; Su(var)3-3; sti; E(z); nmo; cutlet; Mad; MED27; Nse1; Orc5; Ku80; brat; Su(var)3-7; Orc2; spn-E; Apc2; BRWD3; l(3)mbt; Slbp; d4; sub; Ercc1; Mat1; Gasz; nxf2; CG1677; tefu; egg; SMC5; sno
embryo	GO:0050896	4.44838e-05	2.86714	14.4241	29	2803	response to stimulus	0.000157266	9	Roc1a; CDC45L; tyf; mei-9; Caf1-180; CG6613; apt; pav; hang; fu; Su(var)3-3; sti; E(z); nmo; pbl; Mad; Ipk2; MED27; Nse1; Ku80; brat; Apc2; BRWD3; Ercc1; Caf1-105; Gasz; tefu; SMC5; sno
embryo	GO:0051252	4.52441e-05	3.75017	5.27973	16	1026	regulation of RNA metabolic process	0.000158355	9	apt; fu; Su(var)3-3; E(z); Mad; MED27; Orc5; Su(var)3-7; Orc2; spn-E; Apc2; l(3)mbt; d4; tefu; egg; sno
embryo	GO:0007399	4.61945e-05	3.21876	8.49594	21	1651	nervous system development	0.00016008	9	Roc1a; CDC45L; apt; mr; pav; E(z); nmo; pbl; Mad; MED27; brat; Orc2; Apc2; BRWD3; l(3)mbt; d4; Ercc1; scra; CG1677; elg1; Cap-G
embryo	GO:0007276	4.74315e-05	3.73406	5.30031	16	1030	gamete generation	0.000162755	9	apt; fu; Su(var)3-3; pbl; Mad; psd; Grip75; brat; Orc2; spn-E; Apc2; scra; elg1; tefu; egg; Cap-G
embryo	GO:0048518	4.86548e-05	3.58829	5.91783	17	1150	positive regulation of biological process	0.000165332	9	CDC45L; tyf; apt; pav; fu; nmo; pbl; Mad; Ipk2; Nse1; Su(var)3-7; spn-E; Apc2; BRWD3; Caf1-105; scra; sno
embryo	GO:0010558	5.02847e-05	5.41701	2.15615	10	419	negative regulation of macromolecule biosynthetic process	0.000167446	9	apt; E(z); Orc5; Su(var)3-7; Orc2; spn-E; Apc2; l(3)mbt; tefu; egg
embryo	GO:2000113	5.02847e-05	5.41701	2.15615	10	419	negative regulation of cellular macromolecule biosynthetic process	0.000167446	9	apt; E(z); Orc5; Su(var)3-7; Orc2; spn-E; Apc2; l(3)mbt; tefu; egg
embryo	GO:0032506	5.07123e-05	22.8463	0.205837	4	40	cytokinetic process	0.000167446	9	pav; sti; pbl; scra
embryo	GO:0009890	6.01217e-05	5.29638	2.20246	10	428	negative regulation of biosynthetic process	0.000194839	9	apt; E(z); Orc5; Su(var)3-7; Orc2; spn-E; Apc2; l(3)mbt; tefu; egg
embryo	GO:0031327	6.01217e-05	5.29638	2.20246	10	428	negative regulation of cellular biosynthetic process	0.000194839	9	apt; E(z); Orc5; Su(var)3-7; Orc2; spn-E; Apc2; l(3)mbt; tefu; egg
embryo	GO:0007275	6.65399e-05	2.75049	16.3692	31	3181	multicellular organismal development	0.00021366	9	Roc1a; CDC45L; Caf1-180; apt; mr; pav; fu; Su(var)3-3; E(z); nmo; pbl; Mad; MED27; Grip75; brat; Cen; Orc2; spn-E; Apc2; BRWD3; l(3)mbt; d4; CG13427; Ercc1; Sep5; scra; CG1677; elg1; egg; Cap-G; sno
embryo	GO:0009966	6.7173e-05	4.4424	3.20592	12	623	regulation of signal transduction	0.000213732	9	Roc1a; apt; pav; fu; Su(var)3-3; nmo; pbl; Ipk2; MED27; Apc2; BRWD3; Caf1-105
embryo	GO:0051225	6.95066e-05	13.1882	0.432259	5	84	spindle assembly	0.000219165	9	pav; pbl; Grip75; dgt6; sub
embryo	GO:0044767	7.3377e-05	2.69001	19.8993	35	3867	single-organism developmental process	0.000227733	9	Roc1a; CDC45L; Caf1-180; apt; mr; pav; fu; Su(var)3-3; E(z); nmo; pbl; Mad; MED27; psd; Grip75; Orc5; brat; Cen; Orc2; spn-E; Apc2; BRWD3; l(3)mbt; d4; CG13427; Ercc1; Gasz; Sep5; scra; CG1677; elg1; tefu; egg; Cap-G; sno
embryo	GO:0030866	7.41758e-05	20.555	0.226421	4	44	cortical actin cytoskeleton organization	0.000227733	9	pav; sti; pbl; Apc2
embryo	GO:0033206	7.41758e-05	20.555	0.226421	4	44	meiotic cytokinesis	0.000227733	9	sti; pbl; Grip75; scra
embryo	GO:0048856	7.49557e-05	2.70193	18.1652	33	3530	anatomical structure development	0.000228126	9	Roc1a; CDC45L; Caf1-180; apt; mr; pav; fu; Su(var)3-3; E(z); nmo; pbl; Mad; MED27; psd; Grip75; brat; Cen; Orc2; spn-E; Apc2; BRWD3; l(3)mbt; d4; CG13427; Ercc1; Sep5; scra; CG1677; elg1; tefu; egg; Cap-G; sno
embryo	GO:0007126	7.617e-05	6.50215	1.40999	8	274	meiotic nuclear division	0.000229823	9	mei-9; pav; sti; pbl; Grip75; sub; Ercc1; scra
embryo	GO:0046425	8.10994e-05	20.052	0.231567	4	45	regulation of JAK-STAT cascade	0.000242605	9	apt; Ipk2; MED27; BRWD3
embryo	GO:0019219	8.2023e-05	3.55022	5.54732	16	1078	regulation of nucleobase-containing compound metabolic process	0.000243289	9	apt; fu; Su(var)3-3; E(z); Mad; MED27; Orc5; Su(var)3-7; Orc2; spn-E; Apc2; l(3)mbt; d4; tefu; egg; sno
embryo	GO:0006270	8.39447e-05	43.4157	0.0874809	3	17	DNA replication initiation	0.000244839	9	CDC45L; Orc5; Orc2
embryo	GO:0042993	8.39447e-05	43.4157	0.0874809	3	17	positive regulation of transcription factor import into nucleus	0.000244839	9	pav; fu; scra
embryo	GO:1901987	9.01289e-05	9.23937	0.735869	6	143	regulation of cell cycle phase transition	0.000258566	9	CDC45L; mei-9; Mad; CG13599; BRWD3; tefu
embryo	GO:1901990	9.01289e-05	9.23937	0.735869	6	143	regulation of mitotic cell cycle phase transition	0.000258566	9	CDC45L; mei-9; Mad; CG13599; BRWD3; tefu
embryo	GO:0051172	9.30218e-05	5.0105	2.32082	10	451	negative regulation of nitrogen compound metabolic process	0.000264691	9	apt; E(z); Orc5; Su(var)3-7; Orc2; spn-E; Apc2; l(3)mbt; tefu; egg
embryo	GO:0032502	9.37764e-05	2.64776	20.1155	35	3909	developmental process	0.000264691	9	Roc1a; CDC45L; Caf1-180; apt; mr; pav; fu; Su(var)3-3; E(z); nmo; pbl; Mad; MED27; psd; Grip75; Orc5; brat; Cen; Orc2; spn-E; Apc2; BRWD3; l(3)mbt; d4; CG13427; Ercc1; Gasz; Sep5; scra; CG1677; elg1; tefu; egg; Cap-G; sno
embryo	GO:0048731	9.65248e-05	2.8025	12.6281	26	2454	system development	0.00027027	9	Roc1a; CDC45L; Caf1-180; apt; mr; pav; Su(var)3-3; E(z); nmo; pbl; Mad; MED27; brat; Orc2; Apc2; BRWD3; l(3)mbt; d4; Ercc1; Sep5; scra; CG1677; elg1; egg; Cap-G; sno
embryo	GO:0010605	9.78962e-05	4.25871	3.33457	12	648	negative regulation of macromolecule metabolic process	0.000271934	9	apt; Su(var)3-3; E(z); Mad; Orc5; Su(var)3-7; Orc2; spn-E; Apc2; l(3)mbt; tefu; egg
embryo	GO:0045892	0.000109647	5.42938	1.90914	9	371	negative regulation of transcription, DNA-templated	0.000297493	9	E(z); Orc5; Su(var)3-7; Orc2; spn-E; Apc2; l(3)mbt; tefu; egg
embryo	GO:1902679	0.000109647	5.42938	1.90914	9	371	negative regulation of RNA biosynthetic process	0.000297493	9	E(z); Orc5; Su(var)3-7; Orc2; spn-E; Apc2; l(3)mbt; tefu; egg
embryo	GO:1903507	0.000109647	5.42938	1.90914	9	371	negative regulation of nucleic acid-templated transcription	0.000297493	9	E(z); Orc5; Su(var)3-7; Orc2; spn-E; Apc2; l(3)mbt; tefu; egg
embryo	GO:0044702	0.000111187	3.45046	5.6914	16	1106	single organism reproductive process	0.000299349	9	apt; fu; Su(var)3-3; pbl; Mad; psd; Grip75; brat; Orc2; spn-E; Apc2; scra; elg1; tefu; egg; Cap-G
embryo	GO:0042307	0.000118745	37.9826	0.0977728	3	19	positive regulation of protein import into nucleus	0.00031181	9	pav; fu; scra
embryo	GO:1900182	0.000118745	37.9826	0.0977728	3	19	positive regulation of protein localization to nucleus	0.00031181	9	pav; fu; scra
embryo	GO:1904591	0.000118745	37.9826	0.0977728	3	19	positive regulation of protein import	0.00031181	9	pav; fu; scra
embryo	GO:0040029	0.000119379	7.11287	1.11667	7	217	regulation of gene expression, epigenetic	0.00031181	9	E(z); Orc5; Su(var)3-7; Orc2; spn-E; tefu; egg
embryo	GO:0003006	0.000121208	3.55883	5.12021	15	995	developmental process involved in reproduction	0.00031414	9	apt; fu; Su(var)3-3; pbl; Mad; psd; Grip75; brat; Orc2; spn-E; Apc2; elg1; tefu; egg; Cap-G
embryo	GO:0048583	0.000122876	3.71589	4.53357	14	881	regulation of response to stimulus	0.00031414	9	Roc1a; apt; pav; fu; Su(var)3-3; nmo; pbl; Ipk2; MED27; Nse1; Apc2; BRWD3; Caf1-105; tefu
embryo	GO:0030865	0.000122963	17.8652	0.257297	4	50	cortical cytoskeleton organization	0.00031414	9	pav; sti; pbl; Apc2
embryo	GO:0006260	0.000124908	11.5659	0.488864	5	95	DNA replication	0.000316797	9	CDC45L; Caf1-180; cutlet; Orc5; Orc2
embryo	GO:0007259	0.000132916	17.4837	0.262443	4	51	JAK-STAT cascade	0.00033468	9	apt; Ipk2; MED27; BRWD3
embryo	GO:0006342	0.000135587	8.54497	0.792474	6	154	chromatin silencing	0.000338968	9	E(z); Orc5; Su(var)3-7; Orc2; spn-E; tefu
embryo	GO:0051253	0.000145156	5.22113	1.98119	9	385	negative regulation of RNA metabolic process	0.000360316	9	E(z); Orc5; Su(var)3-7; Orc2; spn-E; Apc2; l(3)mbt; tefu; egg
embryo	GO:0044707	0.000156895	2.56464	19.6883	34	3826	single-multicellular organism process	0.000385213	9	Roc1a; CDC45L; Caf1-180; apt; mr; pav; hang; fu; Su(var)3-3; E(z); Gem3; nmo; pbl; Mad; MED27; Grip75; brat; Cen; Orc2; spn-E; Apc2; BRWD3; l(3)mbt; d4; CG13427; Ercc1; Sep5; scra; CG1677; elg1; tefu; egg; Cap-G; sno
embryo	GO:0006807	0.000160505	2.60673	16.256	30	3159	nitrogen compound metabolic process	0.000385213	9	CDC45L; tyf; mei-9; Caf1-180; apt; fu; Su(var)3-3; E(z); cutlet; Mad; MED27; Nse1; Orc5; Ku80; brat; Su(var)3-7; Orc2; spn-E; Apc2; l(3)mbt; Slbp; d4; Ercc1; Mat1; Gasz; CG1677; tefu; egg; SMC5; sno
embryo	GO:0000915	0.00016179	33.7568	0.108065	3	21	actomyosin contractile ring assembly	0.000385213	9	pav; sti; pbl
embryo	GO:0042990	0.00016179	33.7568	0.108065	3	21	regulation of transcription factor import into nucleus	0.000385213	9	pav; fu; scra
embryo	GO:0042991	0.00016179	33.7568	0.108065	3	21	transcription factor import into nucleus	0.000385213	9	pav; fu; scra
embryo	GO:0044837	0.00016179	33.7568	0.108065	3	21	actomyosin contractile ring organization	0.000385213	9	pav; sti; pbl
embryo	GO:0009892	0.000165368	4.01189	3.52497	12	685	negative regulation of metabolic process	0.000391073	9	apt; Su(var)3-3; E(z); Mad; Orc5; Su(var)3-7; Orc2; spn-E; Apc2; l(3)mbt; tefu; egg
embryo	GO:1901988	0.000174671	10.7251	0.524885	5	102	negative regulation of cell cycle phase transition	0.000407566	9	CDC45L; mei-9; Mad; BRWD3; tefu
embryo	GO:1901991	0.000174671	10.7251	0.524885	5	102	negative regulation of mitotic cell cycle phase transition	0.000407566	9	CDC45L; mei-9; Mad; BRWD3; tefu
embryo	GO:0060255	0.000179631	3.01698	7.91445	19	1538	regulation of macromolecule metabolic process	0.000415838	9	tyf; apt; fu; Su(var)3-3; E(z); Mad; MED27; Orc5; brat; Su(var)3-7; Orc2; spn-E; Apc2; BRWD3; l(3)mbt; d4; tefu; egg; sno
embryo	GO:0044087	0.000180593	6.63049	1.19386	7	232	regulation of cellular component biogenesis	0.000415838	9	mr; sti; nmo; Mad; brat; Su(var)3-7; spn-E
embryo	GO:0000724	0.000186648	31.9776	0.113211	3	22	double-strand break repair via homologous recombination	0.000418762	9	mei-9; Caf1-180; SMC5
embryo	GO:0000725	0.000186648	31.9776	0.113211	3	22	recombinational repair	0.000418762	9	mei-9; Caf1-180; SMC5
embryo	GO:0000912	0.000186648	31.9776	0.113211	3	22	assembly of actomyosin apparatus involved in cytokinesis	0.000418762	9	pav; sti; pbl
embryo	GO:0046824	0.000186648	31.9776	0.113211	3	22	positive regulation of nucleocytoplasmic transport	0.000418762	9	pav; fu; scra
embryo	GO:0048609	0.000208109	3.24993	6.00531	16	1167	multicellular organismal reproductive process	0.000463936	9	apt; fu; Su(var)3-3; pbl; Mad; psd; Grip75; brat; Orc2; spn-E; Apc2; scra; elg1; tefu; egg; Cap-G
embryo	GO:0045934	0.000216167	4.93629	2.08925	9	406	negative regulation of nucleobase-containing compound metabolic process	0.00047885	9	E(z); Orc5; Su(var)3-7; Orc2; spn-E; Apc2; l(3)mbt; tefu; egg
embryo	GO:0034645	0.000239863	2.76776	10.2456	22	1991	cellular macromolecule biosynthetic process	0.000528	9	CDC45L; tyf; Caf1-180; apt; fu; Su(var)3-3; E(z); cutlet; Mad; MED27; Orc5; brat; Su(var)3-7; Orc2; spn-E; Apc2; l(3)mbt; d4; Mat1; tefu; egg; sno
embryo	GO:0010033	0.000245476	4.84793	2.12527	9	413	response to organic substance	0.000536979	9	apt; hang; fu; Mad; MED27; Ku80; BRWD3; tefu; SMC5
embryo	GO:0009059	0.000254386	2.75444	10.2867	22	1999	macromolecule biosynthetic process	0.000553013	9	CDC45L; tyf; Caf1-180; apt; fu; Su(var)3-3; E(z); cutlet; Mad; MED27; Orc5; brat; Su(var)3-7; Orc2; spn-E; Apc2; l(3)mbt; d4; Mat1; tefu; egg; sno
embryo	GO:0051255	0.0002581	133.011	0.0257297	2	5	spindle midzone assembly	0.000557005	9	pav; sub
embryo	GO:0010948	0.000259405	9.80732	0.571199	5	111	negative regulation of cell cycle process	0.000557005	9	CDC45L; mei-9; Mad; BRWD3; tefu
embryo	GO:0019953	0.000262974	3.17674	6.12881	16	1191	sexual reproduction	0.000561226	9	apt; fu; Su(var)3-3; pbl; Mad; psd; Grip75; brat; Orc2; spn-E; Apc2; scra; elg1; tefu; egg; Cap-G
embryo	GO:0044700	0.000266283	2.84986	8.8613	20	1722	single organism signaling	0.000564843	9	Roc1a; CG6613; apt; mr; pav; fu; Su(var)3-3; sti; nmo; pbl; Mad; Ipk2; MED27; Orc5; brat; Apc2; BRWD3; Caf1-105; Gasz; sno
embryo	GO:0023052	0.000270508	2.84598	8.87159	20	1724	signaling	0.000570348	9	Roc1a; CG6613; apt; mr; pav; fu; Su(var)3-3; sti; nmo; pbl; Mad; Ipk2; MED27; Orc5; brat; Apc2; BRWD3; Caf1-105; Gasz; sno
embryo	GO:0044237	0.000283003	2.45945	23.9286	38	4650	cellular metabolic process	0.000593121	9	Roc1a; CDC45L; CG2924; tyf; mei-9; Caf1-180; apt; mr; fu; Su(var)3-3; sti; E(z); nmo; cutlet; Mad; Ipk2; MED27; Nse1; CG7840; Orc5; Ku80; brat; Su(var)3-7; Orc2; spn-E; Apc2; l(3)mbt; Slbp; d4; sub; Ercc1; Mat1; Gasz; CG1677; tefu; egg; SMC5; sno
embryo	GO:0097305	0.000293637	9.53506	0.586637	5	114	response to alcohol	0.000611745	9	apt; hang; MED27; Ku80; BRWD3
embryo	GO:0019222	0.000297127	2.8229	8.93334	20	1736	regulation of metabolic process	0.000615352	9	tyf; apt; fu; Su(var)3-3; E(z); pbl; Mad; MED27; Orc5; brat; Su(var)3-7; Orc2; spn-E; Apc2; BRWD3; l(3)mbt; d4; tefu; egg; sno
embryo	GO:0045930	0.000305777	9.44761	0.591783	5	115	negative regulation of mitotic cell cycle	0.000629541	9	CDC45L; mei-9; Mad; BRWD3; tefu
embryo	GO:0044703	0.000309121	3.12668	6.21629	16	1208	multi-organism reproductive process	0.000632704	9	apt; fu; Su(var)3-3; pbl; Mad; psd; Grip75; brat; Orc2; spn-E; Apc2; scra; elg1; tefu; egg; Cap-G
embryo	GO:0016055	0.000318294	9.36173	0.596929	5	116	Wnt signaling pathway	0.000647692	9	Roc1a; pav; nmo; pbl; Apc2
embryo	GO:0080090	0.000338827	2.9226	7.61084	18	1479	regulation of primary metabolic process	0.000685488	9	tyf; apt; fu; Su(var)3-3; E(z); Mad; MED27; Orc5; brat; Su(var)3-7; Orc2; spn-E; Apc2; l(3)mbt; d4; tefu; egg; sno
embryo	GO:0006261	0.000341217	13.4557	0.334486	4	65	DNA-dependent DNA replication	0.000686355	9	CDC45L; Caf1-180; Orc5; Orc2
embryo	GO:0006461	0.000376465	5.08664	1.78049	8	346	protein complex assembly	0.000752931	9	Caf1-180; msd1; pav; pbl; Grip75; dgt6; sub; Caf1-105
embryo	GO:0090316	0.000388401	24.2911	0.144086	3	28	positive regulation of intracellular protein transport	0.000772388	9	pav; fu; scra
embryo	GO:0051960	0.000396725	5.78961	1.35853	7	264	regulation of nervous system development	0.000784189	9	mr; nmo; pbl; Mad; MED27; brat; BRWD3
embryo	GO:0070271	0.000398816	5.04064	1.79593	8	349	protein complex biogenesis	0.000784189	9	Caf1-180; msd1; pav; pbl; Grip75; dgt6; sub; Caf1-105
embryo	GO:0007293	0.000417133	8.80135	0.63295	5	123	germarium-derived egg chamber formation	0.000815623	9	fu; pbl; spn-E; Apc2; Cap-G
embryo	GO:0009790	0.000425348	3.8175	3.33971	11	649	embryo development	0.000825521	9	apt; fu; E(z); pbl; Mad; Grip75; Cen; spn-E; Apc2; l(3)mbt; CG13427
embryo	GO:0007088	0.000429046	12.6236	0.35507	4	69	regulation of mitotic nuclear division	0.000825521	9	CG13599; dgt6; sub; dgt3
embryo	GO:0007112	0.00043163	23.355	0.149232	3	29	male meiosis cytokinesis	0.000825521	9	sti; Grip75; scra
embryo	GO:1903829	0.00043163	23.355	0.149232	3	29	positive regulation of cellular protein localization	0.000825521	9	pav; fu; scra
embryo	GO:1903651	0.000477832	22.4882	0.154378	3	30	positive regulation of cytoplasmic transport	0.000900449	9	pav; fu; scra
embryo	GO:0007095	0.000478524	12.2448	0.365361	4	71	mitotic G2 DNA damage checkpoint	0.000900449	9	CDC45L; mei-9; BRWD3; tefu
embryo	GO:0031572	0.000478524	12.2448	0.365361	4	71	G2 DNA damage checkpoint	0.000900449	9	CDC45L; mei-9; BRWD3; tefu
embryo	GO:0031323	0.000489757	2.82358	7.84241	18	1524	regulation of cellular metabolic process	0.000916657	9	tyf; apt; fu; Su(var)3-3; E(z); Mad; MED27; Orc5; brat; Su(var)3-7; Orc2; spn-E; Apc2; l(3)mbt; d4; tefu; egg; sno
embryo	GO:0044818	0.00050473	12.0637	0.370507	4	72	mitotic G2/M transition checkpoint	0.000939656	9	CDC45L; mei-9; BRWD3; tefu
embryo	GO:0007154	0.000514918	2.68916	9.309	20	1809	cell communication	0.000953552	9	Roc1a; CG6613; apt; mr; pav; fu; Su(var)3-3; sti; nmo; pbl; Mad; Ipk2; MED27; Orc5; brat; Apc2; BRWD3; Caf1-105; Gasz; sno
embryo	GO:0051783	0.000531942	11.8879	0.375653	4	73	regulation of nuclear division	0.000976404	9	CG13599; dgt6; sub; dgt3
embryo	GO:0051297	0.00053758	8.30373	0.668972	5	130	centrosome organization	0.000976404	9	pav; Grip163; Grip75; dgt6; scra
embryo	GO:0000712	0.000538417	79.7935	0.0360215	2	7	resolution of meiotic recombination intermediates	0.000976404	9	mei-9; Ercc1
embryo	GO:0035190	0.000538417	79.7935	0.0360215	2	7	syncytial nuclear migration	0.000976404	9	Apc2; l(3)mbt
embryo	GO:0022414	0.000556967	2.94776	6.55078	16	1273	reproductive process	0.00100484	9	apt; fu; Su(var)3-3; pbl; Mad; psd; Grip75; brat; Orc2; spn-E; Apc2; scra; elg1; tefu; egg; Cap-G
embryo	GO:0045132	0.000560183	11.7171	0.380799	4	74	meiotic chromosome segregation	0.00100546	9	mei-9; pav; sub; Ercc1
embryo	GO:0042306	0.00057949	20.9339	0.16467	3	32	regulation of protein import into nucleus	0.00102955	9	pav; fu; scra
embryo	GO:1904589	0.00057949	20.9339	0.16467	3	32	regulation of protein import	0.00102955	9	pav; fu; scra
embryo	GO:0010972	0.000589474	11.5512	0.385945	4	75	negative regulation of G2/M transition of mitotic cell cycle	0.00103676	9	CDC45L; mei-9; BRWD3; tefu
embryo	GO:1902750	0.000589474	11.5512	0.385945	4	75	negative regulation of cell cycle G2/M phase transition	0.00103676	9	CDC45L; mei-9; BRWD3; tefu
embryo	GO:2000026	0.000593527	4.26672	2.39801	9	466	regulation of multicellular organismal development	0.00103867	9	mr; nmo; pbl; Mad; MED27; brat; spn-E; BRWD3; l(3)mbt
embryo	GO:1900180	0.000635106	20.2344	0.169816	3	33	regulation of protein localization to nucleus	0.00110043	9	pav; fu; scra
embryo	GO:1903533	0.000635106	20.2344	0.169816	3	33	regulation of protein targeting	0.00110043	9	pav; fu; scra
embryo	GO:0031023	0.00063843	7.9811	0.694701	5	135	microtubule organizing center organization	0.00110074	9	pav; Grip163; Grip75; dgt6; scra
embryo	GO:1901576	0.000653588	2.47531	12.5458	24	2438	organic substance biosynthetic process	0.00112135	9	CDC45L; tyf; Caf1-180; apt; fu; Su(var)3-3; E(z); cutlet; Mad; Ipk2; MED27; CG7840; Orc5; brat; Su(var)3-7; Orc2; spn-E; Apc2; l(3)mbt; d4; Mat1; tefu; egg; sno
embryo	GO:0022008	0.000661398	2.81455	7.3381	17	1426	neurogenesis	0.00112922	9	Roc1a; CDC45L; pav; E(z); pbl; MED27; brat; Orc2; Apc2; BRWD3; l(3)mbt; d4; Ercc1; scra; CG1677; elg1; Cap-G
embryo	GO:0044773	0.00068387	11.0802	0.401383	4	78	mitotic DNA damage checkpoint	0.00116191	9	CDC45L; mei-9; BRWD3; tefu
embryo	GO:0045786	0.000705388	7.79916	0.710139	5	138	negative regulation of cell cycle	0.00119269	9	CDC45L; mei-9; Mad; BRWD3; tefu
embryo	GO:0010467	0.000708964	2.48999	11.8254	23	2298	gene expression	0.00119297	9	tyf; apt; fu; Su(var)3-3; E(z); Mad; MED27; Orc5; brat; Su(var)3-7; Orc2; spn-E; Apc2; BRWD3; l(3)mbt; Slbp; d4; Mat1; nxf2; CG1677; tefu; egg; sno
embryo	GO:0051307	0.000715507	66.4892	0.0411675	2	8	meiotic chromosome separation	0.00119597	9	mei-9; Ercc1
embryo	GO:0044774	0.000717583	10.9316	0.406529	4	79	mitotic DNA integrity checkpoint	0.00119597	9	CDC45L; mei-9; BRWD3; tefu
embryo	GO:0033043	0.000723492	5.20874	1.50261	7	292	regulation of organelle organization	0.0012001	9	pav; sti; Su(var)3-7; CG13599; dgt6; sub; dgt3
embryo	GO:0031324	0.000728815	3.81359	3.00008	10	583	negative regulation of cellular metabolic process	0.00120323	9	apt; E(z); Orc5; Su(var)3-7; Orc2; spn-E; Apc2; l(3)mbt; tefu; egg
embryo	GO:0033554	0.000758276	3.79276	3.01552	10	586	cellular response to stress	0.00124599	9	CDC45L; mei-9; Caf1-180; Nse1; Ku80; BRWD3; Ercc1; Gasz; tefu; SMC5
embryo	GO:0010389	0.000825774	10.5085	0.421967	4	82	regulation of G2/M transition of mitotic cell cycle	0.00134428	9	CDC45L; mei-9; BRWD3; tefu
embryo	GO:1902749	0.000825774	10.5085	0.421967	4	82	regulation of cell cycle G2/M phase transition	0.00134428	9	CDC45L; mei-9; BRWD3; tefu
embryo	GO:0007166	0.000830871	3.745	3.05154	10	593	cell surface receptor signaling pathway	0.00134632	9	Roc1a; pav; fu; Su(var)3-3; nmo; pbl; Mad; Apc2; Caf1-105; sno
embryo	GO:0016321	0.000891306	17.8481	0.1904	3	37	female meiosis chromosome segregation	0.00143759	9	mei-9; pav; sub
embryo	GO:0048585	0.000899097	5.01061	1.55922	7	303	negative regulation of response to stimulus	0.0014435	9	Roc1a; apt; fu; nmo; pbl; Apc2; tefu
embryo	GO:0032465	0.000916887	56.9862	0.0463134	2	9	regulation of cytokinesis	0.00145868	9	sti; scra
embryo	GO:0051567	0.000916887	56.9862	0.0463134	2	9	histone H3-K9 methylation	0.00145868	9	E(z); egg
embryo	GO:0009058	0.000928376	2.40316	12.8443	24	2496	biosynthetic process	0.00147028	9	CDC45L; tyf; Caf1-180; apt; fu; Su(var)3-3; E(z); cutlet; Mad; Ipk2; MED27; CG7840; Orc5; brat; Su(var)3-7; Orc2; spn-E; Apc2; l(3)mbt; d4; Mat1; tefu; egg; sno
embryo	GO:0007143	0.000945009	10.1169	0.437405	4	85	female meiotic division	0.00148988	9	mei-9; pav; Grip75; sub
embryo	GO:0006325	0.000961198	4.37779	2.05323	8	399	chromatin organization	0.00149981	9	Caf1-180; Su(var)3-3; sti; E(z); Su(var)3-7; Caf1-105; tefu; egg
embryo	GO:0046822	0.000964165	17.3368	0.195546	3	38	regulation of nucleocytoplasmic transport	0.00149981	9	pav; fu; scra
embryo	GO:0051222	0.000964165	17.3368	0.195546	3	38	positive regulation of protein transport	0.00149981	9	pav; fu; scra
embryo	GO:0000077	0.000987312	9.99268	0.44255	4	86	DNA damage checkpoint	0.00152229	9	CDC45L; mei-9; BRWD3; tefu
embryo	GO:0007405	0.000987312	9.99268	0.44255	4	86	neuroblast proliferation	0.00152229	9	MED27; brat; Apc2; l(3)mbt
embryo	GO:0061351	0.00103093	9.87149	0.447696	4	87	neural precursor cell proliferation	0.00158257	9	MED27; brat; Apc2; l(3)mbt
embryo	GO:0071704	0.00104413	2.25231	27.2838	40	5302	organic substance metabolic process	0.00159584	9	Roc1a; CDC45L; CG2924; tyf; mei-9; Caf1-180; apt; mr; fu; Su(var)3-3; sti; E(z); nmo; cutlet; Mad; Ipk2; MED27; Nse1; CG7840; Orc5; Ku80; brat; Su(var)3-7; Orc2; spn-E; Apc2; BRWD3; l(3)mbt; Slbp; d4; sub; Ercc1; Mat1; Gasz; nxf2; CG1677; tefu; egg; SMC5; sno
embryo	GO:0007165	0.00104994	2.76069	6.94187	16	1349	signal transduction	0.00159773	9	Roc1a; CG6613; apt; pav; fu; Su(var)3-3; sti; nmo; pbl; Mad; Ipk2; MED27; Apc2; BRWD3; Caf1-105; sno
embryo	GO:0032388	0.00112096	16.397	0.205837	3	40	positive regulation of intracellular transport	0.00167852	9	pav; fu; scra
embryo	GO:0007528	0.00112207	7.00011	0.787328	5	153	neuromuscular junction development	0.00167852	9	mr; Gem3; nmo; Mad; brat
embryo	GO:0000086	0.00112221	9.63765	0.457988	4	89	G2/M transition of mitotic cell cycle	0.00167852	9	CDC45L; mei-9; BRWD3; tefu
embryo	GO:0031570	0.00112221	9.63765	0.457988	4	89	DNA integrity checkpoint	0.00167852	9	CDC45L; mei-9; BRWD3; tefu
embryo	GO:0006298	0.00114231	49.8589	0.0514594	2	10	mismatch repair	0.00170131	9	mei-9; Gasz
embryo	GO:0009653	0.00118156	2.49155	9.92651	20	1929	anatomical structure morphogenesis	0.00175231	9	CDC45L; apt; fu; Su(var)3-3; E(z); nmo; pbl; Mad; psd; brat; Orc2; spn-E; Apc2; l(3)mbt; d4; CG13427; Ercc1; scra; Cap-G; sno
embryo	GO:0032504	0.00121041	2.71947	7.03449	16	1367	multicellular organism reproduction	0.00178753	9	apt; fu; Su(var)3-3; pbl; Mad; psd; Grip75; brat; Orc2; spn-E; Apc2; scra; elg1; tefu; egg; Cap-G
embryo	GO:0032501	0.00128991	2.20089	22.7296	35	4417	multicellular organismal process	0.00189693	9	Roc1a; CDC45L; Caf1-180; apt; mr; pav; hang; fu; Su(var)3-3; E(z); Gem3; nmo; pbl; Mad; MED27; psd; Grip75; brat; Cen; Orc2; spn-E; Apc2; BRWD3; l(3)mbt; d4; CG13427; Ercc1; Sep5; scra; CG1677; elg1; tefu; egg; Cap-G; sno
embryo	GO:0008582	0.00132153	9.2015	0.478572	4	93	regulation of synaptic growth at neuromuscular junction	0.00192723	9	mr; nmo; Mad; brat
embryo	GO:1904396	0.00132153	9.2015	0.478572	4	93	regulation of neuromuscular junction development	0.00192723	9	mr; nmo; Mad; brat
embryo	GO:0044839	0.00137499	9.09852	0.483718	4	94	cell cycle G2/M phase transition	0.00199687	9	CDC45L; mei-9; BRWD3; tefu
embryo	GO:0007093	0.00142993	8.9978	0.488864	4	95	mitotic cell cycle checkpoint	0.00206809	9	CDC45L; mei-9; BRWD3; tefu
embryo	GO:0051304	0.0014808	14.7925	0.226421	3	44	chromosome separation	0.00213284	9	mei-9; sub; Ercc1
embryo	GO:0051704	0.00155235	2.58067	7.91445	17	1538	multi-organism process	0.00221886	9	tyf; apt; fu; Su(var)3-3; pbl; Mad; psd; Grip75; brat; Orc2; spn-E; Apc2; scra; elg1; tefu; egg; Cap-G
embryo	GO:0008283	0.00155321	4.53821	1.7136	7	333	cell proliferation	0.00221886	9	Roc1a; cutlet; MED27; brat; Orc2; Apc2; l(3)mbt
embryo	GO:0060429	0.00156547	2.81601	5.83034	14	1133	epithelium development	0.0022273	9	Caf1-180; apt; Su(var)3-3; nmo; pbl; Mad; psd; Orc2; spn-E; Apc2; Sep5; egg; Cap-G; sno
embryo	GO:0051963	0.00160396	8.70851	0.504302	4	98	regulation of synapse assembly	0.00227282	9	mr; nmo; Mad; brat
embryo	GO:0009968	0.00165335	5.20761	1.27105	6	247	negative regulation of signal transduction	0.00231265	9	Roc1a; apt; fu; nmo; pbl; Apc2
embryo	GO:0007020	0.0016643	39.8806	0.0617512	2	12	microtubule nucleation	0.00231265	9	msd1; Grip75
embryo	GO:0031000	0.0016643	39.8806	0.0617512	2	12	response to caffeine	0.00231265	9	tefu; SMC5
embryo	GO:0061647	0.0016643	39.8806	0.0617512	2	12	histone H3-K9 modification	0.00231265	9	E(z); egg
embryo	GO:0072089	0.00166511	8.61614	0.509448	4	99	stem cell proliferation	0.00231265	9	MED27; brat; Apc2; l(3)mbt
embryo	GO:0060341	0.00174354	6.30891	0.869663	5	169	regulation of cellular localization	0.00241201	9	pav; fu; brat; spn-E; scra
embryo	GO:0003002	0.00178617	3.61374	2.80453	9	545	regionalization	0.00246126	9	apt; fu; Su(var)3-3; nmo; Mad; Grip75; brat; spn-E; Apc2
embryo	GO:0014074	0.00196039	36.2522	0.0668972	2	13	response to purine-containing compound	0.00269073	9	tefu; SMC5
embryo	GO:0044271	0.00197507	2.37163	10.3433	20	2010	cellular nitrogen compound biosynthetic process	0.00270029	9	CDC45L; tyf; apt; fu; Su(var)3-3; E(z); Mad; MED27; Orc5; brat; Su(var)3-7; Orc2; spn-E; Apc2; l(3)mbt; d4; Mat1; tefu; egg; sno
embryo	GO:0051052	0.00202265	13.1793	0.252151	3	49	regulation of DNA metabolic process	0.00275458	9	Su(var)3-7; spn-E; egg
embryo	GO:0033157	0.00214391	12.8978	0.257297	3	50	regulation of intracellular protein transport	0.0029084	9	pav; fu; scra
embryo	GO:0000075	0.00221385	7.94175	0.550615	4	107	cell cycle checkpoint	0.00299169	9	CDC45L; mei-9; BRWD3; tefu
embryo	GO:0044238	0.00250954	2.08925	25.4106	37	4938	primary metabolic process	0.00337823	9	Roc1a; CDC45L; CG2924; tyf; mei-9; Caf1-180; apt; mr; fu; Su(var)3-3; sti; E(z); nmo; cutlet; Mad; MED27; Nse1; CG7840; Orc5; Ku80; brat; Su(var)3-7; Orc2; spn-E; Apc2; l(3)mbt; Slbp; d4; sub; Ercc1; Mat1; Gasz; CG1677; tefu; egg; SMC5; sno
embryo	GO:1903649	0.00253448	12.121	0.272735	3	53	regulation of cytoplasmic transport	0.00339317	9	pav; fu; scra
embryo	GO:0023057	0.00254003	4.76334	1.38426	6	269	negative regulation of signaling	0.00339317	9	Roc1a; apt; fu; nmo; pbl; Apc2
embryo	GO:0008152	0.0025584	2.11976	30.3867	42	5905	metabolic process	0.00340471	9	Roc1a; CDC45L; CG2924; tyf; mei-9; Caf1-180; apt; mr; fu; Su(var)3-3; CG5235; sti; E(z); nmo; pbl; cutlet; Mad; Ipk2; MED27; Nse1; CG7840; Orc5; Ku80; brat; Su(var)3-7; Orc2; spn-E; Apc2; BRWD3; l(3)mbt; Slbp; d4; sub; Ercc1; Mat1; Gasz; nxf2; CG1677; tefu; egg; SMC5; sno
embryo	GO:0051531	0.00262154	30.67	0.077189	2	15	NFAT protein import into nucleus	0.00344939	9	pav; scra
embryo	GO:0051532	0.00262154	30.67	0.077189	2	15	regulation of NFAT protein import into nucleus	0.00344939	9	pav; scra
embryo	GO:0051533	0.00262154	30.67	0.077189	2	15	positive regulation of NFAT protein import into nucleus	0.00344939	9	pav; scra
embryo	GO:0007224	0.00267379	11.8824	0.277881	3	54	smoothened signaling pathway	0.00350497	9	Roc1a; pav; fu
embryo	GO:0010648	0.00273367	4.69043	1.40484	6	273	negative regulation of cell communication	0.00357009	9	Roc1a; apt; fu; nmo; pbl; Apc2
embryo	GO:0006913	0.00287638	7.36456	0.591783	4	115	nucleocytoplasmic transport	0.00372864	9	pav; fu; scra; nxf2
embryo	GO:0051169	0.00287638	7.36456	0.591783	4	115	nuclear transport	0.00372864	9	pav; fu; scra; nxf2
embryo	GO:1903827	0.00296639	11.4321	0.288172	3	56	regulation of cellular protein localization	0.00382837	9	pav; fu; scra
embryo	GO:0010332	0.00298613	28.477	0.082335	2	16	response to gamma radiation	0.00382837	9	Caf1-180; Ku80
embryo	GO:0030720	0.00298613	28.477	0.082335	2	16	oocyte localization involved in germarium-derived egg chamber formation	0.00382837	9	spn-E; Apc2
embryo	GO:0007389	0.00312662	3.30922	3.04639	9	592	pattern specification process	0.00399386	9	apt; fu; Su(var)3-3; nmo; Mad; Grip75; brat; spn-E; Apc2
embryo	GO:0051173	0.00326654	3.9509	1.95546	7	380	positive regulation of nitrogen compound metabolic process	0.00415742	9	tyf; apt; fu; Mad; Su(var)3-7; spn-E; sno
embryo	GO:0010529	0.00337309	26.5763	0.0874809	2	17	negative regulation of transposition	0.00427747	9	spn-E; SoYb
embryo	GO:0045595	0.00344034	4.46786	1.47174	6	286	regulation of cell differentiation	0.004347	9	pbl; Mad; MED27; brat; spn-E; BRWD3
embryo	GO:0030030	0.00354582	3.03745	3.71022	10	721	cell projection organization	0.00446263	9	CDC45L; fu; E(z); pbl; psd; brat; Apc2; l(3)mbt; d4; Ercc1
embryo	GO:0044249	0.00355735	2.17665	12.4635	22	2422	cellular biosynthetic process	0.00446263	9	CDC45L; tyf; Caf1-180; apt; fu; Su(var)3-3; E(z); cutlet; Mad; MED27; Orc5; brat; Su(var)3-7; Orc2; spn-E; Apc2; l(3)mbt; d4; Mat1; tefu; egg; sno
embryo	GO:0050807	0.00366354	6.86499	0.63295	4	123	regulation of synapse organization	0.00456313	9	mr; nmo; Mad; brat
embryo	GO:0051124	0.00366354	6.86499	0.63295	4	123	synaptic growth at neuromuscular junction	0.00456313	9	mr; nmo; Mad; brat
embryo	GO:0010528	0.00378218	24.9133	0.0926268	2	18	regulation of transposition	0.0046942	9	spn-E; SoYb
embryo	GO:0042221	0.00383044	2.71893	5.04302	12	980	response to chemical	0.00473729	9	apt; hang; fu; E(z); Mad; MED27; Ku80; brat; Apc2; BRWD3; tefu; SMC5
embryo	GO:0009888	0.00390923	2.52294	6.43242	14	1250	tissue development	0.00481771	9	Caf1-180; apt; Su(var)3-3; nmo; pbl; Mad; psd; Orc2; spn-E; Apc2; Sep5; egg; Cap-G; sno
embryo	GO:0034622	0.00393821	4.34088	1.51291	6	294	cellular macromolecular complex assembly	0.0048364	9	Caf1-180; msd1; Gem3; Grip75; spn-E; Caf1-105
embryo	GO:0032196	0.00421317	23.4459	0.0977728	2	19	transposition	0.00513802	9	spn-E; SoYb
embryo	GO:0046785	0.00421317	23.4459	0.0977728	2	19	microtubule polymerization	0.00513802	9	msd1; Grip75
embryo	GO:0035282	0.0044162	4.23542	1.54893	6	301	segmentation	0.00536692	9	apt; fu; Mad; Grip75; brat; spn-E
embryo	GO:0014070	0.00446281	6.47989	0.668972	4	130	response to organic cyclic compound	0.00540479	9	MED27; BRWD3; tefu; SMC5
embryo	GO:0006606	0.0045234	9.76547	0.334486	3	65	protein import into nucleus	0.00544052	9	pav; fu; scra
embryo	GO:1902593	0.0045234	9.76547	0.334486	3	65	single-organism nuclear import	0.00544052	9	pav; fu; scra
embryo	GO:0044744	0.00472157	9.60968	0.339632	3	66	protein targeting to nucleus	0.0056401	9	pav; fu; scra
embryo	GO:0051170	0.00472157	9.60968	0.339632	3	66	nuclear import	0.0056401	9	pav; fu; scra
embryo	GO:0051223	0.00492493	9.45876	0.344778	3	67	regulation of protein transport	0.00586301	9	pav; fu; scra
embryo	GO:0006928	0.00501074	3.06551	3.27281	9	636	movement of cell or subcellular component	0.00594495	9	apt; pav; fu; E(z); pbl; Mad; brat; Apc2; sub
embryo	GO:0050808	0.00510913	4.86129	1.11667	5	217	synapse organization	0.0060061	9	mr; Gem3; nmo; Mad; brat
embryo	GO:0009893	0.00511376	3.05524	3.28311	9	638	positive regulation of metabolic process	0.0060061	9	tyf; apt; fu; pbl; Mad; Su(var)3-7; spn-E; Apc2; sno
embryo	GO:0048646	0.00511376	3.05524	3.28311	9	638	anatomical structure formation involved in morphogenesis	0.0060061	9	fu; pbl; Mad; psd; Orc2; spn-E; Apc2; scra; Cap-G
embryo	GO:0048513	0.00549122	2.35188	7.41015	15	1440	organ development	0.00642785	9	Caf1-180; apt; Su(var)3-3; E(z); nmo; pbl; Mad; brat; Apc2; l(3)mbt; d4; Sep5; scra; egg; sno
embryo	GO:0010604	0.00578001	3.22395	2.74278	8	533	positive regulation of macromolecule metabolic process	0.00665285	9	tyf; apt; fu; Mad; Su(var)3-7; spn-E; Apc2; sno
embryo	GO:0031032	0.00579095	8.89947	0.365361	3	71	actomyosin structure organization	0.00665285	9	pav; sti; pbl
embryo	GO:0032386	0.00579095	8.89947	0.365361	3	71	regulation of intracellular transport	0.00665285	9	pav; fu; scra
embryo	GO:0034504	0.00579095	8.89947	0.365361	3	71	protein localization to nucleus	0.00665285	9	pav; fu; scra
embryo	GO:0070201	0.00579095	8.89947	0.365361	3	71	regulation of establishment of protein localization	0.00665285	9	pav; fu; scra
embryo	GO:0010608	0.00579748	5.99853	0.720431	4	140	posttranscriptional regulation of gene expression	0.00665285	9	tyf; apt; brat; spn-E
embryo	GO:0051239	0.00594027	2.98027	3.3603	9	653	regulation of multicellular organismal process	0.00679443	9	mr; nmo; pbl; Mad; MED27; brat; spn-E; BRWD3; l(3)mbt
embryo	GO:0006277	0.0061516	18.9739	0.118357	2	23	DNA amplification	0.00696784	9	CDC45L; Orc2
embryo	GO:1902806	0.0061516	18.9739	0.118357	2	23	regulation of cell cycle G1/S phase transition	0.00696784	9	CDC45L; Mad
embryo	GO:2000045	0.0061516	18.9739	0.118357	2	23	regulation of G1/S transition of mitotic cell cycle	0.00696784	9	CDC45L; Mad
embryo	GO:0032989	0.00626541	2.64894	4.6828	11	910	cellular component morphogenesis	0.0070511	9	CDC45L; E(z); pbl; psd; brat; Orc2; spn-E; Apc2; l(3)mbt; d4; Ercc1
embryo	GO:0048699	0.00626541	2.64894	4.6828	11	910	generation of neurons	0.0070511	9	Roc1a; CDC45L; E(z); pbl; MED27; brat; Apc2; BRWD3; l(3)mbt; d4; Ercc1
embryo	GO:1902580	0.00631283	3.47788	2.20761	7	429	single-organism cellular localization	0.0070817	9	pav; fu; Grip75; brat; spn-E; Apc2; scra
embryo	GO:0050793	0.00667343	2.92275	3.42205	9	665	regulation of developmental process	0.00743189	9	mr; nmo; pbl; Mad; MED27; brat; spn-E; BRWD3; l(3)mbt
embryo	GO:0030717	0.0066887	18.11	0.123502	2	24	karyosome formation	0.00743189	9	spn-E; tefu
embryo	GO:0046427	0.0066887	18.11	0.123502	2	24	positive regulation of JAK-STAT cascade	0.00743189	9	Ipk2; BRWD3
embryo	GO:0045471	0.00674282	8.40232	0.385945	3	75	response to ethanol	0.00746832	9	apt; hang; Ku80
embryo	GO:0060284	0.00699398	4.49412	1.20415	5	234	regulation of cell development	0.00772206	9	pbl; MED27; brat; spn-E; BRWD3
embryo	GO:0031325	0.00755883	3.07091	2.87143	8	558	positive regulation of cellular metabolic process	0.00831946	9	tyf; apt; fu; Mad; Su(var)3-7; spn-E; Apc2; sno
embryo	GO:1901700	0.0076303	4.39628	1.22988	5	239	response to oxygen-containing compound	0.0083718	9	apt; hang; MED27; Ku80; BRWD3
embryo	GO:0017038	0.00778261	7.95751	0.406529	3	79	protein import	0.0084325	9	pav; fu; scra
embryo	GO:0000723	0.00782434	16.5981	0.133794	2	26	telomere maintenance	0.0084325	9	Ku80; tefu
embryo	GO:0032200	0.00782434	16.5981	0.133794	2	26	telomere organization	0.0084325	9	Ku80; tefu
embryo	GO:0045887	0.00782434	16.5981	0.133794	2	26	positive regulation of synaptic growth at neuromuscular junction	0.0084325	9	nmo; Mad
embryo	GO:1904398	0.00782434	16.5981	0.133794	2	26	positive regulation of neuromuscular junction development	0.0084325	9	nmo; Mad
embryo	GO:0007416	0.00789944	5.46935	0.787328	4	153	synapse assembly	0.0084325	9	mr; nmo; Mad; brat
embryo	GO:0016569	0.00789944	5.46935	0.787328	4	153	covalent chromatin modification	0.0084325	9	Su(var)3-3; E(z); tefu; egg
embryo	GO:0016570	0.00789944	5.46935	0.787328	4	153	histone modification	0.0084325	9	Su(var)3-3; E(z); tefu; egg
embryo	GO:0045935	0.00790245	3.72878	1.74962	6	340	positive regulation of nucleobase-containing compound metabolic process	0.0084325	9	apt; fu; Mad; Su(var)3-7; spn-E; sno
embryo	GO:0008285	0.00805651	7.85352	0.411675	3	80	negative regulation of cell proliferation	0.00857076	9	MED27; brat; l(3)mbt
embryo	GO:0007350	0.00830607	4.30253	1.25561	5	244	blastoderm segmentation	0.00880947	9	apt; fu; Mad; Grip75; spn-E
embryo	GO:0006289	0.00842244	15.9329	0.13894	2	27	nucleotide-excision repair	0.00887724	9	mei-9; Ercc1
embryo	GO:0007097	0.00842244	15.9329	0.13894	2	27	nuclear migration	0.00887724	9	Apc2; l(3)mbt
embryo	GO:0016568	0.00844606	4.28425	1.26075	5	245	chromatin modification	0.00887724	9	Su(var)3-3; E(z); Su(var)3-7; tefu; egg
embryo	GO:0031497	0.00862125	7.65346	0.421967	3	82	chromatin assembly	0.00902072	9	Caf1-180; Su(var)3-7; Caf1-105
embryo	GO:0048812	0.00863412	2.9967	2.93833	8	571	neuron projection morphogenesis	0.00902072	9	CDC45L; E(z); pbl; brat; Apc2; l(3)mbt; d4; Ercc1
embryo	GO:0051962	0.00891214	7.55717	0.427113	3	83	positive regulation of nervous system development	0.00928348	9	nmo; pbl; Mad
embryo	GO:0007135	0.00904045	15.3189	0.144086	2	28	meiosis II	0.00930634	9	pbl; Grip75
embryo	GO:0007406	0.00904045	15.3189	0.144086	2	28	negative regulation of neuroblast proliferation	0.00930634	9	MED27; brat
embryo	GO:0070828	0.00904045	15.3189	0.144086	2	28	heterochromatin organization	0.00930634	9	Su(var)3-3; Su(var)3-7
embryo	GO:2000178	0.00904045	15.3189	0.144086	2	28	negative regulation of neural precursor cell proliferation	0.00930634	9	MED27; brat
embryo	GO:0050803	0.00921514	5.22094	0.82335	4	160	regulation of synapse structure or activity	0.00945836	9	mr; nmo; Mad; brat
embryo	GO:0030182	0.00932511	2.61249	4.26598	10	829	neuron differentiation	0.00954324	9	Roc1a; CDC45L; E(z); pbl; brat; Apc2; BRWD3; l(3)mbt; d4; Ercc1
embryo	GO:0007127	0.00951107	7.37165	0.437405	3	85	meiosis I	0.00964891	9	mei-9; pbl; Ercc1
embryo	GO:0044089	0.00951107	7.37165	0.437405	3	85	positive regulation of cellular component biogenesis	0.00964891	9	nmo; Mad; Su(var)3-7
embryo	GO:0051298	0.00951107	7.37165	0.437405	3	85	centrosome duplication	0.00964891	9	pav; Grip163; Grip75
embryo	GO:0033301	0.00967814	14.7503	0.149232	2	29	cell cycle comprising mitosis without cytokinesis	0.00976181	9	E(z); l(3)mbt
embryo	GO:0051965	0.00967814	14.7503	0.149232	2	29	positive regulation of synapse assembly	0.00976181	9	nmo; Mad
embryo	GO:0035295	0.00978569	2.59214	4.29686	10	835	tube development	0.00982059	9	Caf1-180; apt; Su(var)3-3; nmo; pbl; Mad; Apc2; Sep5; egg; sno
embryo	GO:0010628	0.00979253	3.5536	1.83195	6	356	positive regulation of gene expression	0.00982059	9	tyf; apt; fu; Mad; spn-E; sno
embryo	GO:0070925	0.00993744	4.10949	1.31221	5	255	organelle assembly	0.00993744	9	pav; pbl; Grip75; dgt6; sub
embryo	GO:0051647	2.55461e-06	167.446	0.0289459	3	40	nucleus localization	0.00019926	10	polo; alphaTub67C; gammaTub37C
embryo	GO:0051258	1.22658e-05	96.5938	0.0484844	3	67	protein polymerization	0.000456362	10	polo; alphaTub67C; gammaTub37C
embryo	GO:0070925	2.00586e-05	38.8112	0.18453	4	255	organelle assembly	0.000456362	10	polo; alphaTub67C; me31B; gammaTub37C
embryo	GO:0007020	3.0609e-05	354.8	0.00868377	2	12	microtubule nucleation	0.000456362	10	polo; gammaTub37C
embryo	GO:0044702	3.24002e-05	20.5964	0.800354	6	1106	single organism reproductive process	0.000456362	10	polo; alphaTub67C; me31B; gammaTub37C; Pxt; rig
embryo	GO:0034622	3.51048e-05	33.4841	0.212752	4	294	cellular macromolecular complex assembly	0.000456362	10	polo; alphaTub67C; me31B; gammaTub37C
embryo	GO:0007056	4.86414e-05	272.857	0.0108547	2	15	spindle assembly involved in female meiosis	0.000466503	10	polo; gammaTub37C
embryo	GO:0019953	4.96195e-05	18.9755	0.861864	6	1191	sexual reproduction	0.000466503	10	polo; alphaTub67C; me31B; gammaTub37C; Pxt; rig
embryo	GO:0044703	5.38273e-05	18.6789	0.874166	6	1208	multi-organism reproductive process	0.000466503	10	polo; alphaTub67C; me31B; gammaTub37C; Pxt; rig
embryo	GO:0022414	7.26929e-05	17.618	0.921203	6	1273	reproductive process	0.000560871	10	polo; alphaTub67C; me31B; gammaTub37C; Pxt; rig
embryo	GO:0046785	7.90971e-05	208.588	0.0137493	2	19	microtubule polymerization	0.000560871	10	polo; gammaTub37C
embryo	GO:0090306	0.00010673	177.257	0.0159202	2	22	spindle assembly involved in meiosis	0.000693746	10	polo; gammaTub37C
embryo	GO:0031122	0.000127426	161.117	0.0173675	2	24	cytoplasmic microtubule organization	0.000764557	10	polo; gammaTub37C
embryo	GO:0065003	0.000145106	22.9289	0.306103	4	423	macromolecular complex assembly	0.000769993	10	polo; alphaTub67C; me31B; gammaTub37C
embryo	GO:0043623	0.000148076	40.6523	0.111442	3	154	cellular protein complex assembly	0.000769993	10	polo; alphaTub67C; gammaTub37C
embryo	GO:0007097	0.00016187	141.749	0.0195385	2	27	nuclear migration	0.000789118	10	polo; alphaTub67C
embryo	GO:0051704	0.000213266	14.2245	1.11297	6	1538	multi-organism process	0.000941894	10	polo; alphaTub67C; me31B; gammaTub37C; Pxt; rig
embryo	GO:0040023	0.000228311	118.076	0.0231567	2	32	establishment of nucleus localization	0.000941894	10	polo; alphaTub67C
embryo	GO:0022607	0.000238907	15.3472	0.680952	5	941	cellular component assembly	0.000941894	10	polo; alphaTub67C; me31B; gammaTub37C; Pxt
embryo	GO:0030154	0.000259634	14.534	1.7505	7	2419	cell differentiation	0.000941894	10	polo; DNApol-delta; alphaTub67C; me31B; gammaTub37C; Pxt; rig
embryo	GO:0022412	0.000261359	15.0341	0.693978	5	959	cellular process involved in reproduction in multicellular organism	0.000941894	10	polo; me31B; gammaTub37C; Pxt; rig
embryo	GO:0000003	0.000265662	13.6033	1.15711	6	1599	reproduction	0.000941894	10	polo; alphaTub67C; me31B; gammaTub37C; Pxt; rig
embryo	GO:0003006	0.000311149	14.4419	0.720029	5	995	developmental process involved in reproduction	0.000982771	10	polo; me31B; gammaTub37C; Pxt; rig
embryo	GO:0000212	0.000322865	98.3492	0.0274986	2	38	meiotic spindle organization	0.000982771	10	polo; gammaTub37C
embryo	GO:0007338	0.000322865	98.3492	0.0274986	2	38	single fertilization	0.000982771	10	polo; alphaTub67C
embryo	GO:0048869	0.000339071	13.8161	1.82287	7	2519	cellular developmental process	0.000982771	10	polo; DNApol-delta; alphaTub67C; me31B; gammaTub37C; Pxt; rig
embryo	GO:0009566	0.00034019	95.6834	0.0282222	2	39	fertilization	0.000982771	10	polo; alphaTub67C
embryo	GO:0044085	0.000356353	13.9953	0.741015	5	1024	cellular component biogenesis	0.000985242	10	polo; alphaTub67C; me31B; gammaTub37C; Pxt
embryo	GO:0007276	0.000366308	13.9061	0.745357	5	1030	gamete generation	0.000985242	10	polo; me31B; gammaTub37C; Pxt; rig
embryo	GO:0051640	0.00048911	26.7544	0.167162	3	231	organelle localization	0.00127169	10	polo; alphaTub67C; gammaTub37C
embryo	GO:0031109	0.000560074	73.6905	0.0361824	2	50	microtubule polymerization or depolymerization	0.00140922	10	polo; gammaTub37C
embryo	GO:0048609	0.000658297	12.1192	0.844496	5	1167	multicellular organismal reproductive process	0.00159705	10	polo; me31B; gammaTub37C; Pxt; rig
embryo	GO:0007051	0.000675676	23.8686	0.186701	3	258	spindle organization	0.00159705	10	polo; alphaTub67C; gammaTub37C
embryo	GO:0006997	0.00112722	51.176	0.0513789	2	71	nucleus organization	0.00258598	10	polo; alphaTub67C
embryo	GO:0048477	0.0013141	12.4742	0.544906	4	753	oogenesis	0.00289154	10	polo; gammaTub37C; Pxt; rig
embryo	GO:0007292	0.00136728	12.3339	0.550696	4	761	female gamete generation	0.00289154	10	polo; gammaTub37C; Pxt; rig
embryo	GO:0032504	0.00137163	10.156	0.989226	5	1367	multicellular organism reproduction	0.00289154	10	polo; me31B; gammaTub37C; Pxt; rig
embryo	GO:0051225	0.00157358	43.0174	0.0607864	2	84	spindle assembly	0.00308683	10	polo; gammaTub37C
embryo	GO:0006461	0.00158271	17.6166	0.250382	3	346	protein complex assembly	0.00308683	10	polo; alphaTub67C; gammaTub37C
embryo	GO:0007143	0.00161089	42.4957	0.06151	2	85	female meiotic division	0.00308683	10	polo; gammaTub37C
embryo	GO:0070271	0.00162257	17.4595	0.252553	3	349	protein complex biogenesis	0.00308683	10	polo; alphaTub67C; gammaTub37C
embryo	GO:0022402	0.00192592	11.1788	0.603522	4	834	cell cycle process	0.00357671	10	polo; alphaTub67C; me31B; gammaTub37C
embryo	GO:0007281	0.00231204	10.6018	0.633915	4	876	germ cell development	0.00419394	10	polo; gammaTub37C; Pxt; rig
embryo	GO:0000226	0.00297017	14.0187	0.311892	3	431	microtubule cytoskeleton organization	0.00522303	10	polo; alphaTub67C; gammaTub37C
embryo	GO:0048856	0.00301329	8.84686	2.55447	7	3530	anatomical structure development	0.00522303	10	polo; DNApol-delta; alphaTub67C; me31B; gammaTub37C; Pxt; rig
embryo	GO:0048468	0.00332621	8.13671	1.20125	5	1660	cell development	0.00564009	10	polo; me31B; gammaTub37C; Pxt; rig
embryo	GO:0007049	0.00348574	9.39733	0.708451	4	979	cell cycle	0.00575223	10	polo; alphaTub67C; me31B; gammaTub37C
embryo	GO:0007057	0.00361358	388.25	0.00361824	1	5	spindle assembly involved in female meiosis I	0.00575223	10	gammaTub37C
embryo	GO:0051255	0.00361358	388.25	0.00361824	1	5	spindle midzone assembly	0.00575223	10	polo
embryo	GO:0051297	0.00372011	27.4554	0.0940741	2	130	centrosome organization	0.00580338	10	polo; alphaTub67C
embryo	GO:0043933	0.00390807	9.0831	0.730884	4	1010	macromolecular complex subunit organization	0.00597705	10	polo; alphaTub67C; me31B; gammaTub37C
embryo	GO:0031023	0.00400539	26.4125	0.0976924	2	135	microtubule organizing center organization	0.00600809	10	polo; alphaTub67C
embryo	GO:0007147	0.00433491	310.575	0.00434188	1	6	female meiosis II	0.00626153	10	polo
embryo	GO:0008608	0.00433491	310.575	0.00434188	1	6	attachment of spindle microtubules to kinetochore	0.00626153	10	gammaTub37C
embryo	GO:0000280	0.00449965	12.0282	0.3611	3	499	nuclear division	0.00638132	10	polo; alphaTub67C; gammaTub37C
embryo	GO:0048285	0.00486469	11.6843	0.371231	3	513	organelle fission	0.00677582	10	polo; alphaTub67C; gammaTub37C
embryo	GO:0044767	0.00535585	7.76891	2.79834	7	3867	single-organism developmental process	0.00702702	10	polo; DNApol-delta; alphaTub67C; me31B; gammaTub37C; Pxt; rig
embryo	GO:0007017	0.00561926	11.0717	0.390769	3	540	microtubule-based process	0.00702702	10	polo; alphaTub67C; gammaTub37C
embryo	GO:0032502	0.00573046	7.64762	2.82874	7	3909	developmental process	0.00702702	10	polo; DNApol-delta; alphaTub67C; me31B; gammaTub37C; Pxt; rig
embryo	GO:0006271	0.00577616	221.804	0.00578918	1	8	DNA strand elongation involved in DNA replication	0.00702702	10	DNApol-delta
embryo	GO:0007144	0.00577616	221.804	0.00578918	1	8	female meiosis I	0.00702702	10	gammaTub37C
embryo	GO:0022616	0.00577616	221.804	0.00578918	1	8	DNA strand elongation	0.00702702	10	DNApol-delta
embryo	GO:0031644	0.00577616	221.804	0.00578918	1	8	regulation of neurological system process	0.00702702	10	me31B
embryo	GO:0090328	0.00577616	221.804	0.00578918	1	8	regulation of olfactory learning	0.00702702	10	me31B
embryo	GO:1903047	0.00585585	10.9018	0.396559	3	548	mitotic cell cycle process	0.00702702	10	polo; alphaTub67C; me31B
embryo	GO:0000741	0.00649609	194.062	0.00651282	1	9	karyogamy	0.0072385	10	polo
embryo	GO:0007344	0.00649609	194.062	0.00651282	1	9	pronuclear fusion	0.0072385	10	polo
embryo	GO:0033962	0.00649609	194.062	0.00651282	1	9	cytoplasmic mRNA processing body assembly	0.0072385	10	me31B
embryo	GO:0040016	0.00649609	194.062	0.00651282	1	9	embryonic cleavage	0.0072385	10	alphaTub67C
embryo	GO:0042743	0.00649609	194.062	0.00651282	1	9	hydrogen peroxide metabolic process	0.0072385	10	Pxt
embryo	GO:0009994	0.00770914	18.7028	0.136769	2	189	oocyte differentiation	0.00846919	10	polo; gammaTub37C
embryo	GO:0046959	0.00793456	155.225	0.00796012	1	11	habituation	0.00859577	10	me31B
embryo	GO:0000278	0.00859958	9.42652	0.455174	3	629	mitotic cell cycle	0.00912083	10	polo; alphaTub67C; me31B
embryo	GO:0034453	0.0086531	141.102	0.00868377	1	12	microtubule anchoring	0.00912083	10	gammaTub37C
embryo	GO:0051656	0.00885005	17.3802	0.1469	2	203	establishment of organelle localization	0.0091801	10	polo; alphaTub67C
embryo	GO:0048646	0.00894472	9.28583	0.461687	3	638	anatomical structure formation involved in morphogenesis	0.0091801	10	me31B; Pxt; rig
embryo	GO:0046958	0.00937118	129.333	0.00940741	1	13	nonassociative learning	0.00949288	10	me31B
embryo	GO:0071822	0.00994698	8.91515	0.479778	3	663	protein complex subunit organization	0.00994698	10	polo; alphaTub67C; gammaTub37C
embryo	GO:0007049	1.84121e-07	4.62932	5.90375	21	979	cell cycle	2.14458e-05	11	Claspin; Grip128; vfl; mus301; Sse; Cp110; CG3326; Spc105R; asl; Bub1; Nuf2; wg; Dl; SNF4Agamma; Trf4-2; Sry-alpha; Topors; nopo; tef; sca; slx1
embryo	GO:0051276	2.87864e-07	5.64135	3.51572	16	583	chromosome organization	2.14458e-05	11	HipHop; mus301; Sse; CG3326; Spc105R; Bub1; Nuf2; Top3alpha; E(var)3-9; Trf4-2; Topors; nopo; tef; krimp; tej; Su(var)3-9
embryo	GO:0007059	1.14819e-06	9.83835	1.07341	9	178	chromosome segregation	5.70266e-05	11	mus301; Sse; CG3326; Bub1; Nuf2; Trf4-2; Topors; tef; sca
embryo	GO:0009987	1.79204e-06	4.03948	46.3677	65	7689	cellular process	6.67534e-05	11	CG4061; Ipk1; Mes4; twi; Claspin; CG11357; Grip128; vfl; CG9376; HipHop; bora; sina; Gbs-70E; CG8783; mus301; Sse; spo; Tak1; Cp110; CG15443; CG3326; insv; Spc105R; dgrn; CG1239; asl; Bub1; Nuf2; wg; bib; tam; dnt; Top3alpha; scw; fs(2)ltoPP43; neur; E(var)3-9; ear; CG14317; Dl; SNF4Agamma; vret; Trf4-2; dan; CG7609; Axn; Sry-alpha; CG10465; Topors; nopo; tef; krimp; tej; sca; CG30007; dmpd; gdl;…
embryo	GO:0098813	4.44479e-06	9.78704	0.946772	8	157	nuclear chromosome segregation	0.000132455	11	mus301; Sse; CG3326; Bub1; Nuf2; Topors; tef; sca
embryo	GO:0022402	7.03643e-06	4.14184	5.02935	17	834	cell cycle process	0.000149814	11	Claspin; Grip128; mus301; Sse; Cp110; CG3326; Spc105R; asl; Bub1; Nuf2; wg; Trf4-2; Sry-alpha; Topors; tef; sca; slx1
embryo	GO:1902589	7.03826e-06	3.51099	8.01439	22	1329	single-organism organelle organization	0.000149814	11	twi; Grip128; HipHop; mus301; Sse; Cp110; CG3326; Spc105R; asl; Bub1; Nuf2; wg; E(var)3-9; Dl; Trf4-2; Sry-alpha; Topors; tef; krimp; tej; sca; Su(var)3-9
embryo	GO:0007398	9.90246e-06	36.599	0.138699	4	23	ectoderm development	0.000172946	11	wg; bib; neur; Dl
embryo	GO:0030154	1.04464e-05	2.94269	14.5875	31	2419	cell differentiation	0.000172946	11	twi; Grip128; HipHop; bora; sina; CG8783; mus301; Sse; spo; CG15443; Spc105R; dgrn; CG1239; asl; Nuf2; wg; bib; dnt; scw; fs(2)ltoPP43; neur; Dl; vret; Axn; krimp; tej; sca; CG30007; gdl; NA; Su(var)3-9
embryo	GO:0006996	1.26696e-05	3.10745	11.0296	26	1829	organelle organization	0.000188778	11	twi; Grip128; HipHop; mus301; Sse; Cp110; CG3326; Spc105R; asl; Bub1; Nuf2; wg; tam; Top3alpha; E(var)3-9; Dl; Trf4-2; CG7609; Sry-alpha; Topors; nopo; tef; krimp; tej; sca; Su(var)3-9
embryo	GO:0044763	1.6114e-05	2.81018	34.729	53	5759	single-organism cellular process	0.000218271	11	Ipk1; twi; Claspin; CG11357; Grip128; vfl; CG9376; HipHop; bora; sina; Gbs-70E; CG8783; mus301; Sse; spo; Tak1; Cp110; CG15443; CG3326; insv; Spc105R; dgrn; CG1239; asl; Bub1; Nuf2; wg; bib; dnt; Top3alpha; scw; fs(2)ltoPP43; neur; E(var)3-9; Dl; SNF4Agamma; vret; Trf4-2; Axn; Sry-alpha; Topors; nopo; tef; krimp; tej; sca; CG30007; gdl; NA; slx1; GIIIspla2; Su(var)3-9
embryo	GO:0003006	1.85159e-05	3.6799	6.00024	18	995	developmental process involved in reproduction	0.000229905	11	Grip128; CG8783; mus301; spo; dgrn; asl; wg; bib; scw; fs(2)ltoPP43; neur; Dl; vret; Axn; krimp; tej; gdl; Su(var)3-9
embryo	GO:0016318	2.23801e-05	28.9624	0.168851	4	28	ommatidial rotation	0.000234011	11	Tak1; wg; Dl; sca
embryo	GO:0048646	2.32095e-05	4.31726	3.84739	14	638	anatomical structure formation involved in morphogenesis	0.000234011	11	twi; vfl; CG8783; mus301; asl; wg; scw; fs(2)ltoPP43; neur; Dl; vret; dan; Sry-alpha; NA
embryo	GO:0048869	2.43269e-05	2.79609	15.1906	31	2519	cellular developmental process	0.000234011	11	twi; Grip128; HipHop; bora; sina; CG8783; mus301; Sse; spo; CG15443; Spc105R; dgrn; CG1239; asl; Nuf2; wg; bib; dnt; scw; fs(2)ltoPP43; neur; Dl; vret; Axn; krimp; tej; sca; CG30007; gdl; NA; Su(var)3-9
embryo	GO:0007498	2.51287e-05	11.7258	0.584948	6	97	mesoderm development	0.000234011	11	twi; wg; bib; scw; neur; Dl
embryo	GO:0045165	2.83118e-05	4.81945	2.90665	12	482	cell fate commitment	0.000248144	11	twi; bora; sina; mus301; CG15443; wg; bib; dnt; scw; neur; Dl; sca
embryo	GO:0048477	3.5242e-05	3.93767	4.54089	15	753	oogenesis	0.000291725	11	Grip128; CG8783; mus301; spo; wg; bib; fs(2)ltoPP43; neur; Dl; vret; Axn; krimp; tej; gdl; Su(var)3-9
embryo	GO:0007292	3.98236e-05	3.89276	4.58913	15	761	female gamete generation	0.000312301	11	Grip128; CG8783; mus301; spo; wg; bib; fs(2)ltoPP43; neur; Dl; vret; Axn; krimp; tej; gdl; Su(var)3-9
embryo	GO:0007389	4.70033e-05	4.26706	3.56999	13	592	pattern specification process	0.000350175	11	twi; Grip128; mus301; Tak1; wg; scw; neur; Dl; dan; Axn; krimp; sca; dmpd
embryo	GO:0007281	5.30751e-05	3.62696	5.28262	16	876	germ cell development	0.00037658	11	Grip128; CG8783; mus301; spo; asl; wg; bib; fs(2)ltoPP43; neur; Dl; vret; Axn; krimp; tej; gdl; Su(var)3-9
embryo	GO:0000278	8.73204e-05	3.99817	3.79312	13	629	mitotic cell cycle	0.000591397	11	Claspin; Grip128; vfl; Sse; CG3326; Spc105R; Bub1; Nuf2; wg; Dl; Topors; nopo; slx1
embryo	GO:0044767	0.000126719	2.41514	23.3195	39	3867	single-organism developmental process	0.000820918	11	twi; Grip128; vfl; HipHop; bora; sina; CG8783; mus301; Sse; spo; Tak1; CG15443; Spc105R; dgrn; CG1239; asl; Nuf2; wg; bib; tam; dnt; Top3alpha; scw; fs(2)ltoPP43; neur; Dl; vret; dan; Axn; Sry-alpha; nopo; krimp; tej; sca; CG30007; dmpd; gdl; NA; Su(var)3-9
embryo	GO:0022412	0.000154599	3.28386	5.78315	16	959	cellular process involved in reproduction in multicellular organism	0.000938041	11	Grip128; CG8783; mus301; spo; asl; wg; bib; fs(2)ltoPP43; neur; Dl; vret; Axn; krimp; tej; gdl; Su(var)3-9
embryo	GO:0016043	0.000158719	2.47878	16.6861	31	2767	cellular component organization	0.000938041	11	twi; Grip128; HipHop; CG8783; mus301; Sse; Cp110; CG3326; Spc105R; asl; Bub1; Nuf2; wg; tam; dnt; Top3alpha; neur; E(var)3-9; Dl; Trf4-2; CG7609; Sry-alpha; CG10465; Topors; nopo; tef; krimp; tej; sca; NA; Su(var)3-9
embryo	GO:0032502	0.000163685	2.37717	23.5728	39	3909	developmental process	0.000938041	11	twi; Grip128; vfl; HipHop; bora; sina; CG8783; mus301; Sse; spo; Tak1; CG15443; Spc105R; dgrn; CG1239; asl; Nuf2; wg; bib; tam; dnt; Top3alpha; scw; fs(2)ltoPP43; neur; Dl; vret; dan; Axn; Sry-alpha; nopo; krimp; tej; sca; CG30007; dmpd; gdl; NA; Su(var)3-9
embryo	GO:0016567	0.000179618	6.59474	1.18799	7	197	protein ubiquitination	0.000973371	11	sina; dgrn; Bub1; neur; Topors; nopo; CG42797
embryo	GO:0070647	0.000182915	5.64646	1.59202	8	264	protein modification by small protein conjugation or removal	0.000973371	11	sina; dgrn; Bub1; neur; Topors; nopo; CG6091; CG42797
embryo	GO:0044719	0.000223051	30.2574	0.120608	3	20	regulation of imaginal disc-derived wing size	0.00113199	11	vfl; wg; bib
embryo	GO:0048856	0.000238023	2.34283	21.2873	36	3530	anatomical structure development	0.00113199	11	twi; Grip128; vfl; HipHop; bora; sina; CG8783; mus301; Sse; spo; Tak1; Spc105R; dgrn; CG1239; asl; Nuf2; wg; bib; dnt; Top3alpha; scw; fs(2)ltoPP43; neur; Dl; vret; dan; Axn; Sry-alpha; nopo; krimp; tej; sca; CG30007; gdl; NA; Su(var)3-9
embryo	GO:0044702	0.000249173	3.03412	6.66961	17	1106	single organism reproductive process	0.00113199	11	Grip128; CG8783; mus301; spo; asl; wg; bib; scw; fs(2)ltoPP43; neur; Dl; vret; Axn; krimp; tej; gdl; Su(var)3-9
embryo	GO:0071840	0.000249176	2.4038	17.0841	31	2833	cellular component organization or biogenesis	0.00113199	11	twi; Grip128; HipHop; CG8783; mus301; Sse; Cp110; CG3326; Spc105R; asl; Bub1; Nuf2; wg; tam; dnt; Top3alpha; neur; E(var)3-9; Dl; Trf4-2; CG7609; Sry-alpha; CG10465; Topors; nopo; tef; krimp; tej; sca; NA; Su(var)3-9
embryo	GO:0032446	0.000250709	6.2282	1.25432	7	208	protein modification by small protein conjugation	0.00113199	11	sina; dgrn; Bub1; neur; Topors; nopo; CG42797
embryo	GO:0045168	0.000273594	6.13509	1.27241	7	211	cell-cell signaling involved in cell fate commitment	0.00119898	11	CG15443; wg; bib; dnt; neur; Dl; sca
embryo	GO:0065007	0.000339523	2.2886	21.6431	36	3589	biological regulation	0.00139057	11	twi; Claspin; vfl; HipHop; bora; sina; Gbs-70E; CG8783; mus301; spo; Tak1; insv; dgrn; Bub1; wg; bib; dnt; scw; neur; ear; Dl; SNF4Agamma; vret; dan; Axn; Topors; nopo; krimp; tej; sca; CG11825; dmpd; NA; slx1; Su(var)3-9
embryo	GO:0050794	0.000340649	2.3357	18.2058	32	3019	regulation of cellular process	0.00139057	11	twi; Claspin; vfl; bora; sina; Gbs-70E; CG8783; mus301; Tak1; insv; dgrn; Bub1; wg; bib; dnt; scw; neur; ear; Dl; SNF4Agamma; vret; dan; Axn; Topors; nopo; krimp; tej; dmpd; NA; slx1; Su(var)3-9
embryo	GO:0007276	0.000349448	3.03493	6.2113	16	1030	gamete generation	0.00139057	11	Grip128; CG8783; mus301; spo; asl; wg; bib; fs(2)ltoPP43; neur; Dl; vret; Axn; krimp; tej; gdl; Su(var)3-9
embryo	GO:0045468	0.000354642	112.868	0.030152	2	5	regulation of R8 cell spacing in compound eye	0.00139057	11	Dl; sca
embryo	GO:0007346	0.000372333	5.81594	1.33875	7	222	regulation of mitotic cell cycle	0.00141767	11	Claspin; Bub1; wg; Dl; Topors; nopo; slx1
embryo	GO:0030717	0.000389207	24.4861	0.144729	3	24	karyosome formation	0.00141767	11	mus301; krimp; tej
embryo	GO:0003002	0.0003965	3.807	3.28656	11	545	regionalization	0.00141767	11	twi; Grip128; mus301; wg; scw; neur; Dl; dan; Axn; krimp; dmpd
embryo	GO:0009953	0.000399612	6.89328	0.964863	6	160	dorsal/ventral pattern formation	0.00141767	11	twi; mus301; wg; scw; Dl; krimp
embryo	GO:0022414	0.00044156	2.7948	7.67669	18	1273	reproductive process	0.00153006	11	Grip128; CG8783; mus301; spo; dgrn; asl; wg; bib; scw; fs(2)ltoPP43; neur; Dl; vret; Axn; krimp; tej; gdl; Su(var)3-9
embryo	GO:0010948	0.000543312	8.25876	0.669374	5	111	negative regulation of cell cycle process	0.00183816	11	Claspin; Bub1; wg; Topors; slx1
embryo	GO:0042067	0.000555148	11.7479	0.379915	4	63	establishment of ommatidial planar polarity	0.00183816	11	Tak1; wg; Dl; sca
embryo	GO:0009798	0.000738457	5.15557	1.50157	7	249	axis specification	0.00234259	11	twi; Grip128; mus301; wg; scw; Dl; krimp
embryo	GO:0034508	0.000738938	67.7096	0.0422128	2	7	centromere complex assembly	0.00234259	11	HipHop; Spc105R
embryo	GO:0000003	0.00097033	2.48327	9.6426	20	1599	reproduction	0.00301207	11	Grip128; CG8783; mus301; Sse; spo; asl; wg; bib; fs(2)ltoPP43; neur; Dl; vret; Axn; Topors; tef; krimp; tej; sca; gdl; Su(var)3-9
embryo	GO:0045132	0.00102012	9.89296	0.446249	4	74	meiotic chromosome segregation	0.003102	11	mus301; Topors; tef; sca
embryo	GO:0060571	0.00125688	48.3562	0.0542735	2	9	morphogenesis of an epithelial fold	0.00372496	11	wg; NA
embryo	GO:0051726	0.00127498	4.14667	2.13476	8	354	regulation of cell cycle	0.00372496	11	Claspin; Bub1; wg; Dl; SNF4Agamma; Topors; nopo; slx1
embryo	GO:0048609	0.00136205	2.64142	7.03747	16	1167	multicellular organismal reproductive process	0.00390281	11	Grip128; CG8783; mus301; spo; asl; wg; bib; fs(2)ltoPP43; neur; Dl; vret; Axn; krimp; tej; gdl; Su(var)3-9
embryo	GO:0045786	0.00144886	6.56767	0.832194	5	138	negative regulation of cell cycle	0.00396753	11	Claspin; Bub1; wg; Topors; slx1
embryo	GO:0019827	0.00149544	8.87252	0.494492	4	82	stem cell population maintenance	0.00396753	11	wg; neur; Dl; Axn
embryo	GO:0098727	0.00149544	8.87252	0.494492	4	82	maintenance of cell number	0.00396753	11	wg; neur; Dl; Axn
embryo	GO:0006259	0.00152251	4.52455	1.70057	7	282	DNA metabolic process	0.00396753	11	Mes4; HipHop; wg; tam; Top3alpha; slx1; Su(var)3-9
embryo	GO:0048468	0.00154811	2.37738	10.0105	20	1660	cell development	0.00396753	11	twi; Grip128; sina; CG8783; mus301; spo; asl; wg; bib; dnt; fs(2)ltoPP43; neur; Dl; vret; Axn; krimp; tej; gdl; NA; Su(var)3-9
embryo	GO:0000002	0.00156497	42.3082	0.0603039	2	10	mitochondrial genome maintenance	0.00396753	11	tam; Top3alpha
embryo	GO:0046331	0.00157103	5.23461	1.25432	6	208	lateral inhibition	0.00396753	11	CG15443; bib; dnt; neur; Dl; sca
embryo	GO:0044699	0.00167021	2.22075	45.5053	58	7546	single-organism process	0.00411273	11	Ipk1; twi; Claspin; CG11357; Grip128; vfl; CG9376; HipHop; bora; sina; Gbs-70E; CG8783; iPLA2-VIA; mus301; Sse; spo; Tak1; Cp110; CG15443; CG3326; insv; Spc105R; dgrn; CG1239; asl; Bub1; Nuf2; wg; bib; tam; dnt; Top3alpha; scw; fs(2)ltoPP43; neur; E(var)3-9; Dl; SNF4Agamma; vret; Trf4-2; dan; Axn; Sry-alpha; Topors; nopo; tef; krimp; tej; sca; CG30007; dmpd; gdl; NA; CG6091; slx1; GIIIspla2; Su(v…
embryo	GO:0019953	0.00168583	2.58193	7.1822	16	1191	sexual reproduction	0.00411273	11	Grip128; CG8783; mus301; spo; asl; wg; bib; fs(2)ltoPP43; neur; Dl; vret; Axn; krimp; tej; gdl; Su(var)3-9
embryo	GO:0009952	0.00173065	5.13128	1.27844	6	212	anterior/posterior pattern specification	0.00411273	11	Grip128; mus301; wg; scw; Dl; dmpd
embryo	GO:0050789	0.00173894	2.0726	19.8882	32	3298	regulation of biological process	0.00411273	11	twi; Claspin; vfl; bora; sina; Gbs-70E; CG8783; mus301; Tak1; insv; dgrn; Bub1; wg; bib; dnt; scw; neur; ear; Dl; SNF4Agamma; vret; dan; Axn; Topors; nopo; krimp; tej; dmpd; NA; slx1; Su(var)3-9
embryo	GO:0045995	0.00186052	8.33463	0.524644	4	87	regulation of embryonic development	0.00433152	11	dgrn; wg; nopo; NA
embryo	GO:0044703	0.00195277	2.54124	7.28471	16	1208	multi-organism reproductive process	0.00447634	11	Grip128; CG8783; mus301; spo; asl; wg; bib; fs(2)ltoPP43; neur; Dl; vret; Axn; krimp; tej; gdl; Su(var)3-9
embryo	GO:0001703	0.00218603	12.8354	0.259307	3	43	gastrulation with mouth forming first	0.00478999	11	twi; scw; NA
embryo	GO:0010004	0.00218603	12.8354	0.259307	3	43	gastrulation involving germ band extension	0.00478999	11	twi; scw; NA
embryo	GO:0031146	0.00218603	12.8354	0.259307	3	43	SCF-dependent proteasomal ubiquitin-dependent protein catabolic process	0.00478999	11	CG14317; dmpd; CG34025
embryo	GO:0007472	0.00223516	3.77521	2.33376	8	387	wing disc morphogenesis	0.00479158	11	vfl; Tak1; wg; bib; neur; Dl; Axn; sca
embryo	GO:0070192	0.00227742	33.8411	0.0723647	2	12	chromosome organization involved in meiosis	0.00479158	11	Topors; tef
embryo	GO:0000070	0.00228323	7.85787	0.554796	4	92	mitotic sister chromatid segregation	0.00479158	11	Sse; CG3326; Bub1; Nuf2
embryo	GO:0007093	0.00256636	7.59697	0.572887	4	95	mitotic cell cycle checkpoint	0.00531093	11	Claspin; Bub1; Topors; slx1
embryo	GO:0007460	0.00268101	30.7621	0.0783951	2	13	R8 cell fate commitment	0.0054722	11	Dl; sca
embryo	GO:0010498	0.00276833	5.62535	0.964863	5	160	proteasomal protein catabolic process	0.00557407	11	sina; Bub1; CG14317; dmpd; CG34025
embryo	GO:0051301	0.00284466	4.02874	1.89957	7	315	cell division	0.00563208	11	Grip128; asl; Bub1; neur; Dl; Sry-alpha; Su(var)3-9
embryo	GO:0008356	0.00287274	7.35271	0.590979	4	98	asymmetric cell division	0.00563208	11	asl; neur; Dl; Su(var)3-9
embryo	GO:0000819	0.0029802	7.27472	0.597009	4	99	sister chromatid segregation	0.00563825	11	Sse; CG3326; Bub1; Nuf2
embryo	GO:0001708	0.0029802	7.27472	0.597009	4	99	cell fate specification	0.00563825	11	twi; wg; scw; Dl
embryo	GO:0000280	0.00298941	3.3039	3.00917	9	499	nuclear division	0.00563825	11	Grip128; mus301; Sse; CG3326; Bub1; Nuf2; Topors; tef; sca
embryo	GO:0045787	0.00318026	11.1558	0.295489	3	49	positive regulation of cell cycle	0.00592323	11	Dl; SNF4Agamma; nopo
embryo	GO:0007098	0.00331902	7.0503	0.6151	4	102	centrosome cycle	0.00595824	11	Grip128; Cp110; asl; Topors
embryo	GO:1901988	0.00331902	7.0503	0.6151	4	102	negative regulation of cell cycle phase transition	0.00595824	11	Claspin; Bub1; Topors; slx1
embryo	GO:1901991	0.00331902	7.0503	0.6151	4	102	negative regulation of mitotic cell cycle phase transition	0.00595824	11	Claspin; Bub1; Topors; slx1
embryo	GO:0002009	0.00354515	2.84619	4.31173	11	715	morphogenesis of an epithelium	0.00615146	11	twi; vfl; spo; Tak1; wg; bib; neur; Dl; Axn; sca; NA
embryo	GO:0001736	0.00355895	6.90817	0.627161	4	104	establishment of planar polarity	0.00615146	11	Tak1; wg; Dl; sca
embryo	GO:0007164	0.00355895	6.90817	0.627161	4	104	establishment of tissue polarity	0.00615146	11	Tak1; wg; Dl; sca
embryo	GO:0048285	0.00359179	3.20833	3.09359	9	513	organelle fission	0.00615146	11	Grip128; mus301; Sse; CG3326; Bub1; Nuf2; Topors; tef; sca
embryo	GO:0000075	0.00394057	6.70532	0.645252	4	107	cell cycle checkpoint	0.00658855	11	Claspin; Bub1; Topors; slx1
embryo	GO:0009948	0.00396609	5.15342	1.04929	5	174	anterior/posterior axis specification	0.00658855	11	Grip128; mus301; wg; scw; Dl
embryo	GO:0006511	0.00400964	4.30062	1.51363	6	251	ubiquitin-dependent protein catabolic process	0.00658855	11	sina; Bub1; CG14317; Topors; dmpd; CG34025
embryo	GO:0009653	0.00404936	2.13074	11.6326	21	1929	anatomical structure morphogenesis	0.00658855	11	twi; vfl; sina; CG8783; mus301; spo; Tak1; asl; wg; bib; dnt; scw; fs(2)ltoPP43; neur; Dl; vret; dan; Axn; Sry-alpha; sca; NA
embryo	GO:0035153	0.00407664	24.1644	0.0964863	2	16	epithelial cell type specification, open tracheal system	0.00658855	11	wg; Dl
embryo	GO:0048729	0.00419302	2.77912	4.40822	11	731	tissue morphogenesis	0.00658855	11	twi; vfl; spo; Tak1; wg; bib; neur; Dl; Axn; sca; NA
embryo	GO:0007275	0.00423106	1.9488	19.1827	30	3181	multicellular organismal development	0.00658855	11	twi; Grip128; vfl; HipHop; bora; sina; mus301; Sse; spo; Tak1; Spc105R; dgrn; CG1239; Nuf2; wg; bib; tam; dnt; scw; neur; Dl; dan; Axn; Sry-alpha; nopo; krimp; sca; CG30007; dmpd; NA
embryo	GO:0019941	0.00424846	4.24755	1.53172	6	254	modification-dependent protein catabolic process	0.00658855	11	sina; Bub1; CG14317; Topors; dmpd; CG34025
embryo	GO:0043632	0.00433036	4.23014	1.53775	6	255	modification-dependent macromolecule catabolic process	0.00658855	11	sina; Bub1; CG14317; Topors; dmpd; CG34025
embryo	GO:0048565	0.00434903	6.51395	0.663343	4	110	digestive tract development	0.00658855	11	twi; spo; wg; scw
embryo	GO:0055123	0.00434903	6.51395	0.663343	4	110	digestive system development	0.00658855	11	twi; spo; wg; scw
embryo	GO:0001752	0.00441314	9.86378	0.331672	3	55	compound eye photoreceptor fate commitment	0.00658855	11	sina; Dl; sca
embryo	GO:0044257	0.00449767	4.19574	1.54981	6	257	cellular protein catabolic process	0.00658855	11	sina; Bub1; CG14317; Topors; dmpd; CG34025
embryo	GO:0051603	0.00449767	4.19574	1.54981	6	257	proteolysis involved in cellular protein catabolic process	0.00658855	11	sina; Bub1; CG14317; Topors; dmpd; CG34025
embryo	GO:0044260	0.00458954	1.90785	21.9446	33	3639	cellular macromolecule metabolic process	0.00658855	11	CG4061; Mes4; twi; CG11357; vfl; CG9376; HipHop; bora; sina; Gbs-70E; mus301; Tak1; dgrn; Bub1; wg; tam; dnt; Top3alpha; scw; neur; ear; CG14317; vret; dan; Topors; nopo; krimp; dmpd; CG6091; CG34025; slx1; CG42797; Su(var)3-9
embryo	GO:0010529	0.00460222	22.5516	0.102517	2	17	negative regulation of transposition	0.00658855	11	vret; tej
embryo	GO:0035019	0.00460222	22.5516	0.102517	2	17	somatic stem cell population maintenance	0.00658855	11	wg; Axn
embryo	GO:0042706	0.00464294	9.67689	0.337702	3	56	eye photoreceptor cell fate commitment	0.00658855	11	sina; Dl; sca
embryo	GO:0032501	0.00492979	1.87229	26.6362	38	4417	multicellular organismal process	0.00692962	11	twi; Grip128; vfl; HipHop; bora; sina; Gbs-70E; CG8783; mus301; Sse; spo; Tak1; Spc105R; dgrn; CG1239; asl; Nuf2; wg; bib; tam; dnt; scw; fs(2)ltoPP43; neur; Dl; vret; dan; Axn; Sry-alpha; nopo; krimp; tej; sca; CG30007; dmpd; gdl; NA; Su(var)3-9
embryo	GO:0045930	0.00509179	6.21799	0.693495	4	115	negative regulation of mitotic cell cycle	0.00698589	11	Claspin; Bub1; Topors; slx1
embryo	GO:0048598	0.00512111	4.07954	1.59202	6	264	embryonic morphogenesis	0.00698589	11	twi; spo; Tak1; wg; scw; NA
embryo	GO:0007060	0.00515737	21.1404	0.108547	2	18	male meiosis chromosome segregation	0.00698589	11	Topors; tef
embryo	GO:0010528	0.00515737	21.1404	0.108547	2	18	regulation of transposition	0.00698589	11	vret; tej
embryo	GO:0001738	0.00524991	6.16197	0.699526	4	116	morphogenesis of a polarized epithelium	0.00704718	11	Tak1; wg; Dl; sca
embryo	GO:0009790	0.00539057	2.82244	3.91373	10	649	embryo development	0.00717138	11	twi; Grip128; spo; Tak1; dgrn; wg; scw; Dl; nopo; NA
embryo	GO:1903047	0.00552122	2.99115	3.30466	9	548	mitotic cell cycle process	0.00725014	11	Claspin; Grip128; Sse; CG3326; Spc105R; Bub1; Nuf2; Topors; slx1
embryo	GO:0046552	0.005634	8.99488	0.361824	3	60	photoreceptor cell fate commitment	0.00725014	11	sina; Dl; sca
embryo	GO:0006464	0.00567909	2.3758	6.65152	14	1103	cellular protein modification process	0.00725014	11	CG11357; CG9376; bora; sina; Tak1; dgrn; Bub1; dnt; neur; Topors; nopo; CG6091; CG42797; Su(var)3-9
embryo	GO:0036211	0.00567909	2.3758	6.65152	14	1103	protein modification process	0.00725014	11	CG11357; CG9376; bora; sina; Tak1; dgrn; Bub1; dnt; neur; Topors; nopo; CG6091; CG42797; Su(var)3-9
embryo	GO:0007370	0.00574172	19.8952	0.114577	2	19	ventral furrow formation	0.00725014	11	twi; NA
embryo	GO:0032196	0.00574172	19.8952	0.114577	2	19	transposition	0.00725014	11	vret; tej
embryo	GO:0030163	0.00590909	3.95423	1.64027	6	272	protein catabolic process	0.00739878	11	sina; Bub1; CG14317; Topors; dmpd; CG34025
embryo	GO:0007126	0.00611923	3.92408	1.65233	6	274	meiotic nuclear division	0.00759804	11	Grip128; mus301; Sse; Topors; tef; sca
embryo	GO:0045465	0.0063549	18.7884	0.120608	2	20	R8 cell differentiation	0.00782546	11	Dl; sca
embryo	GO:0007293	0.00644981	5.79619	0.741738	4	123	germarium-derived egg chamber formation	0.00787723	11	CG8783; mus301; Dl; vret
embryo	GO:0032504	0.00666619	2.21024	8.24355	16	1367	multicellular organism reproduction	0.0080129	11	Grip128; CG8783; mus301; spo; asl; wg; bib; fs(2)ltoPP43; neur; Dl; vret; Axn; krimp; tej; gdl; Su(var)3-9
embryo	GO:1903046	0.00666846	3.85061	1.68248	6	279	meiotic cell cycle process	0.0080129	11	Grip128; mus301; Sse; Topors; tef; sca
embryo	GO:2000026	0.00684703	3.10343	2.81016	8	466	regulation of multicellular organismal development	0.00816166	11	twi; sina; dgrn; wg; neur; Dl; nopo; NA
embryo	GO:0032147	0.00699657	17.7981	0.126638	2	21	activation of protein kinase activity	0.00816562	11	bora; Tak1
embryo	GO:0051260	0.00699657	17.7981	0.126638	2	21	protein homooligomerization	0.00816562	11	neur; CG10465
embryo	GO:0051321	0.00701476	3.80781	1.70057	6	282	meiotic cell cycle	0.00816562	11	Grip128; mus301; Sse; Topors; tef; sca
embryo	GO:0007010	0.00713278	2.70178	4.07655	10	676	cytoskeleton organization	0.00822318	11	twi; Grip128; Cp110; Spc105R; asl; Nuf2; wg; Dl; Sry-alpha; Topors
embryo	GO:0060562	0.00717459	2.86315	3.44335	9	571	epithelial tube morphogenesis	0.00822318	11	twi; vfl; Tak1; wg; bib; neur; Dl; Axn; sca
embryo	GO:0009996	0.00766635	16.9068	0.132669	2	22	negative regulation of cell fate specification	0.00863932	11	wg; Dl
embryo	GO:0046165	0.00766635	16.9068	0.132669	2	22	alcohol biosynthetic process	0.00863932	11	Ipk1; spo
embryo	GO:0010564	0.00771161	4.36576	1.2302	5	204	regulation of cell cycle process	0.00863932	11	Claspin; Bub1; wg; Topors; slx1
embryo	GO:0051297	0.00781951	5.47105	0.783951	4	130	centrosome organization	0.00869483	11	Grip128; Cp110; asl; Topors
embryo	GO:0007476	0.00795917	3.29962	2.29758	7	381	imaginal disc-derived wing morphogenesis	0.00878456	11	vfl; wg; bib; neur; Dl; Axn; sca
embryo	GO:0043412	0.00851433	2.25489	6.97113	14	1156	macromolecule modification	0.00927902	11	CG11357; CG9376; bora; sina; Tak1; dgrn; Bub1; dnt; neur; Topors; nopo; CG6091; CG42797; Su(var)3-9
embryo	GO:0006974	0.00853172	3.64553	1.77294	6	294	cellular response to DNA damage stimulus	0.00927902	11	Mes4; HipHop; Top3alpha; SNF4Agamma; Topors; slx1
embryo	GO:0016331	0.00868206	5.30098	0.808073	4	134	morphogenesis of embryonic epithelium	0.0093741	11	twi; spo; Tak1; wg
embryo	GO:0031023	0.00890703	5.26008	0.814103	4	135	microtubule organizing center organization	0.00947023	11	Grip128; Cp110; asl; Topors
embryo	GO:0051704	0.00897225	2.08911	9.27474	17	1538	multi-organism process	0.00947023	11	Grip128; CG8783; mus301; spo; Tak1; asl; wg; bib; fs(2)ltoPP43; neur; Dl; vret; Axn; krimp; tej; gdl; Su(var)3-9
embryo	GO:0007099	0.00908888	15.3674	0.144729	2	24	centriole replication	0.00947023	11	Cp110; asl
embryo	GO:0010454	0.00908888	15.3674	0.144729	2	24	negative regulation of cell fate commitment	0.00947023	11	wg; Dl
embryo	GO:0098534	0.00908888	15.3674	0.144729	2	24	centriole assembly	0.00947023	11	Cp110; asl
embryo	GO:0051716	0.00917996	2.01307	10.8668	19	1802	cellular response to stimulus	0.00949871	11	Mes4; HipHop; CG8783; Tak1; insv; wg; bib; dnt; Top3alpha; scw; neur; Dl; SNF4Agamma; Axn; Topors; nopo; NA; slx1
embryo	GO:0044818	0.00932674	7.42331	0.434188	3	72	mitotic G2/M transition checkpoint	0.00958403	11	Claspin; Topors; slx1
embryo	GO:0007187	0.00984092	14.698	0.15076	2	25	G-protein coupled receptor signaling pathway, coupled to cyclic nucleotide second messenger	0.00991755	11	NA
embryo	GO:0007188	0.00984092	14.698	0.15076	2	25	adenylate cyclase-modulating G-protein coupled receptor signaling pathway	0.00991755	11	NA
embryo	GO:0007560	0.00991755	2.89912	2.99711	8	497	imaginal disc morphogenesis	0.00991755	11	vfl; Tak1; wg; bib; neur; Dl; Axn; sca
embryo	GO:0048563	0.00991755	2.89912	2.99711	8	497	post-embryonic organ morphogenesis	0.00991755	11	vfl; Tak1; wg; bib; neur; Dl; Axn; sca
larva	GO:1901071	4.56073e-05	14.7583	0.400257	5	131	glucosamine-containing compound metabolic process	0.000189192	1	CG13806; CG10140; CG10154; beta4GalNAcTA; CG4835
larva	GO:0006040	4.7298e-05	14.6409	0.403313	5	132	amino sugar metabolic process	0.000189192	1	CG13806; CG10140; CG10154; beta4GalNAcTA; CG4835
larva	GO:0006030	0.000502696	12.2443	0.372759	4	122	chitin metabolic process	0.00117701	1	CG13806; CG10140; CG10154; CG4835
larva	GO:0015918	0.000588504	68.8278	0.0366648	2	12	sterol transport	0.00117701	1	Npc2d; Npc2e
larva	GO:0006022	0.00101191	10.0831	0.449144	4	147	aminoglycan metabolic process	0.00161906	1	CG13806; CG10140; CG10154; CG4835
larva	GO:0015850	0.00150433	40.4641	0.0580526	2	19	organic hydroxy compound transport	0.00200577	1	Npc2d; Npc2e
larva	GO:0006869	0.0047949	21.4705	0.103884	2	34	lipid transport	0.00547989	1	Npc2d; Npc2e
larva	GO:0055114	0.00633258	4.03943	1.6988	6	556	oxidation-reduction process	0.00633258	1	Trh; Cyp28d2; Cyp313a3; Cyp317a1; Cyp4p2; CG31371
larva	GO:0030002	0.00224972	690.389	0.00225135	1	7	cellular anion homeostasis	0.00321272	2	CG8629
larva	GO:0042049	0.00224972	690.389	0.00225135	1	7	cellular acyl-CoA homeostasis	0.00321272	2	CG8629
larva	GO:0055081	0.00321272	460.148	0.00321621	1	10	anion homeostasis	0.00321272	2	CG8629
larva	GO:0040003	8.69012e-06	22.7896	0.295891	5	184	chitin-based cuticle development	3.47605e-05	3	NA; TwdlV; TwdlD; Tb
larva	GO:0042335	2.95592e-05	17.5072	0.381121	5	237	cuticle development	5.91183e-05	3	NA; TwdlV; TwdlD; Tb
larva	GO:0010171	0.00084182	55.0756	0.0434188	2	27	body morphogenesis	0.00112243	3	TwdlD; Tb
larva	GO:0006939	0.00801599	163.329	0.00804052	1	5	smooth muscle contraction	0.00801599	3	slmo
larva	GO:0043649	0.00521626	258.75	0.00522634	1	5	dicarboxylic acid catabolic process	0.00937118	4	Gs2
larva	GO:0042632	0.0062565	206.983	0.00627161	1	6	cholesterol homeostasis	0.00937118	4	mag
larva	GO:0006629	0.00712175	9.23248	0.411836	3	394	lipid metabolic process	0.00937118	4	mag; CG31148; CG6283
larva	GO:0055092	0.00729573	172.472	0.00731688	1	7	sterol homeostasis	0.00937118	4	mag
larva	GO:0006541	0.00937118	129.333	0.00940741	1	9	glutamine metabolic process	0.00937118	4	Gs2
larva	GO:0009065	0.00937118	129.333	0.00940741	1	9	glutamine family amino acid catabolic process	0.00937118	4	Gs2
larva	GO:0010171	1.02793e-07	126.783	0.0455898	4	27	body morphogenesis	1.13073e-06	5	TwdlG; TwdlW; TwdlQ; TwdlB
larva	GO:0040003	1.12695e-05	21.3635	0.310686	5	184	chitin-based cuticle development	6.19824e-05	5	Cpr5C; TwdlG; TwdlW; TwdlQ; TwdlB
larva	GO:0042335	3.81966e-05	16.4116	0.400177	5	237	cuticle development	0.000140054	5	Cpr5C; TwdlG; TwdlW; TwdlQ; TwdlB
larva	GO:0006030	0.00107653	17.2227	0.205998	3	122	chitin metabolic process	0.00247752	5	Cht9; CG7017; CG3348
larva	GO:1901071	0.00132209	16	0.221195	3	131	glucosamine-containing compound metabolic process	0.00247752	5	Cht9; CG7017; CG3348
larva	GO:0006040	0.00135137	15.8747	0.222883	3	132	amino sugar metabolic process	0.00247752	5	Cht9; CG7017; CG3348
larva	GO:0006022	0.00184059	14.2037	0.248211	3	147	aminoglycan metabolic process	0.00289236	5	Cht9; CG7017; CG3348
larva	GO:0017182	0.00841544	155.15	0.00844255	1	5	peptidyl-diphthamide metabolic process	0.00841544	5	CG14701
larva	GO:0017183	0.00841544	155.15	0.00844255	1	5	peptidyl-diphthamide biosynthetic process from peptidyl-histidine	0.00841544	5	CG14701
larva	GO:0018202	0.00841544	155.15	0.00844255	1	5	peptidyl-histidine modification	0.00841544	5	CG14701
larva	GO:0032053	0.00841544	155.15	0.00844255	1	5	ciliary basal body organization	0.00841544	5	Rootletin
larva	GO:0010171	2.73863e-10	216.731	0.0390769	5	27	body morphogenesis	8.21589e-10	6	TwdlX; TwdlM; TwdlN; TwdlP; TwdlJ
larva	GO:0040003	3.83871e-09	44.0134	0.266302	7	184	chitin-based cuticle development	5.75806e-09	6	TwdlX; TwdlF; TwdlM; TwdlN; TwdlP; Cpr49Ad; TwdlJ
larva	GO:0042335	2.22318e-08	33.7245	0.343009	7	237	cuticle development	2.22318e-08	6	TwdlX; TwdlF; TwdlM; TwdlN; TwdlP; Cpr49Ad; TwdlJ
larva	GO:0006684	0.00521626	258.75	0.00522634	1	5	sphingomyelin metabolic process	0.00833395	7	CG15534
larva	GO:0034204	0.0062565	206.983	0.00627161	1	6	lipid translocation	0.00833395	7	CG4301
larva	GO:0045332	0.0062565	206.983	0.00627161	1	6	phospholipid translocation	0.00833395	7	CG4301
larva	GO:0015914	0.00729573	172.472	0.00731688	1	7	phospholipid transport	0.00833395	7	CG4301
larva	GO:0030002	0.00729573	172.472	0.00731688	1	7	cellular anion homeostasis	0.00833395	7	CG15829
larva	GO:0042049	0.00729573	172.472	0.00731688	1	7	cellular acyl-CoA homeostasis	0.00833395	7	CG15829
larva	GO:0006508	0.00794624	6.4064	0.846667	4	810	proteolysis	0.00833395	7	Jon66Ci; CG17571; CG17475; epsilonTry
larva	GO:0030149	0.00833395	147.821	0.00836215	1	8	sphingolipid catabolic process	0.00833395	7	CG15534
larva	GO:0046466	0.00833395	147.821	0.00836215	1	8	membrane lipid catabolic process	0.00833395	7	CG15534
larva	GO:0097035	0.00833395	147.821	0.00836215	1	8	regulation of membrane lipid distribution	0.00833395	7	CG4301
larva	GO:0046434	0.00111094	47.4636	0.0498513	2	31	organophosphate catabolic process	0.00777658	8	CG15533; CG42249
larva	GO:0006684	0.00801599	163.329	0.00804052	1	5	sphingomyelin metabolic process	0.00961185	8	CG15533
larva	GO:1901565	0.00828216	16.3135	0.138297	2	86	organonitrogen compound catabolic process	0.00961185	8	Adgf-C; CG15533
larva	GO:0034655	0.00846889	16.1203	0.139905	2	87	nucleobase-containing compound catabolic process	0.00961185	8	Adgf-C; CG42249
larva	GO:0043103	0.00961185	130.653	0.00964863	1	6	hypoxanthine salvage	0.00961185	8	Adgf-C
larva	GO:0046100	0.00961185	130.653	0.00964863	1	6	hypoxanthine metabolic process	0.00961185	8	Adgf-C
larva	GO:0046101	0.00961185	130.653	0.00964863	1	6	hypoxanthine biosynthetic process	0.00961185	8	Adgf-C
pupa	GO:0007594	9.55491e-07	221.571	0.0205033	3	15	puparial adhesion	5.41445e-06	1	Sgs7; Sgs3; Sgs8
pupa	GO:0022608	9.55491e-07	221.571	0.0205033	3	15	multicellular organism adhesion	5.41445e-06	1	Sgs7; Sgs3; Sgs8
pupa	GO:0022609	9.55491e-07	221.571	0.0205033	3	15	multicellular organism adhesion to substrate	5.41445e-06	1	Sgs7; Sgs3; Sgs8
pupa	GO:0007591	3.54464e-06	49.9757	0.109351	4	80	molting cycle, chitin-based cuticle	1.26672e-05	1	Lcp9; Sgs7; Sgs3; Sgs8
pupa	GO:0042303	3.72565e-06	49.3227	0.110718	4	81	molting cycle	1.26672e-05	1	Lcp9; Sgs7; Sgs3; Sgs8
pupa	GO:0040003	9.49161e-05	20.9231	0.251508	4	184	chitin-based cuticle development	0.000247582	1	Cpr60D; Lcp9; Cpr78E; Pcp
pupa	GO:0006952	0.000107148	13.6842	0.508483	5	372	defense response	0.000247582	1	PGRP-SB2; Eig71Eb; Eig71Ef; Eig71Ec; Eig71Ea
pupa	GO:0042742	0.000116509	19.8057	0.265176	4	194	defense response to bacterium	0.000247582	1	Eig71Eb; Eig71Ef; Eig71Ec; Eig71Ea
pupa	GO:0009617	0.000202764	17.0629	0.306183	4	224	response to bacterium	0.000382999	1	Eig71Eb; Eig71Ef; Eig71Ec; Eig71Ea
pupa	GO:0042335	0.000251698	16.0938	0.323953	4	237	cuticle development	0.000427887	1	Cpr60D; Lcp9; Cpr78E; Pcp
pupa	GO:0098542	0.000299335	15.3544	0.338989	4	248	defense response to other organism	0.000462609	1	Eig71Eb; Eig71Ef; Eig71Ec; Eig71Ea
pupa	GO:0043207	0.00102882	10.9321	0.47021	4	344	response to external biotic stimulus	0.00127656	1	Eig71Eb; Eig71Ef; Eig71Ec; Eig71Ea
pupa	GO:0051707	0.00102882	10.9321	0.47021	4	344	response to other organism	0.00127656	1	Eig71Eb; Eig71Ef; Eig71Ec; Eig71Ea
pupa	GO:0009607	0.00105128	10.8664	0.472944	4	346	response to biotic stimulus	0.00127656	1	Eig71Eb; Eig71Ef; Eig71Ec; Eig71Ea
pupa	GO:0006950	0.00298659	5.42857	1.55825	6	1140	response to stress	0.0033848	1	PGRP-SB2; Eig71Eb; Eig71Ef; Eig71Ec; Eig71Ea; Hsp67Ba
pupa	GO:0022610	0.00395032	11.0154	0.328053	3	240	biological adhesion	0.00419722	1	Sgs7; Sgs3; Sgs8
pupa	GO:0007552	0.00525479	6.84875	0.735386	4	538	metamorphosis	0.00525479	1	Eig71Ec; Eig71Ea; ImpE1; tnc
pupa	GO:0016337	0.00267379	11.8824	0.277881	3	64	single organismal cell-cell adhesion	0.00517379	2	Gbp; Cad86C; pyd
pupa	GO:0098602	0.0034492	10.813	0.303932	3	70	single organism cell adhesion	0.00517379	2	Gbp; Cad86C; pyd
pupa	GO:0006952	0.00529237	4.10417	1.61518	6	372	defense response	0.00529237	2	Drsl6; Tep2; Gbp; Mmp2; Ephrin; dsb
pupa	GO:0040003	2.80439e-05	17.0852	0.369864	5	184	chitin-based cuticle development	5.60877e-05	3	Cpr76Bb; Cpr66Cb; TwdlE; Cpr50Ca; Cpr76Bc
pupa	GO:0042335	9.37096e-05	13.125	0.476401	5	237	cuticle development	9.37096e-05	3	Cpr76Bb; Cpr66Cb; TwdlE; Cpr50Ca; Cpr76Bc
pupa	GO:0006952	0.000619333	8.6376	0.717858	5	372	defense response	0.00502328	4	LysX; Drsl1; Eig71Ei; CG7227; Eig71Eh
pupa	GO:0006030	0.00160352	14.7587	0.235427	3	122	chitin metabolic process	0.00502328	4	CG13676; CG14244; Cht6
pupa	GO:1901071	0.00196613	13.7109	0.252794	3	131	glucosamine-containing compound metabolic process	0.00502328	4	CG13676; CG14244; Cht6
[truncated: 399 more rows]
