# Supplementary material for: The developmental proteome of Drosophila melanogaster
Source: HighWire-hosted journal article supplement (doi:10.1101/gr.213694.116), 2017-04-05
Supplement: Supplemental_Tables.zip [file Supplemental_Table_S6.xlsx]

## Sheet: Sheet1
	Af_1	Af_2	Af_3	Af_4	Am_1	Am_2	Am_3	Am_4	pval	es	fc	de	gene
FBtr0307555;FBtr0307554;FBtr0070000	21.8798	21.8798	21.8798	21.8798	21.8798	21.8798	21.8798	21.8798	0.421923	0	0	FALSE	Nep3
FBtr0303256;FBtr0070006;FBtr0343173	30.547	30.129	30.713	31.3853	30.8971	30.4761	31.1553	30.2907	0.979123	0.0131133	-0.0112284	FALSE	CG9572
FBtr0070007	32.4478	32.2618	32.3887	32.4449	32.4997	32.5105	32.347	32.6488	0.387483	0.496171	-0.115716	FALSE	CG9577
FBtr0070008	24.2002	26.0799	23.3392	23.8815	23.6565	23.892	24.5911	24.0367	0.67198	0.196961	0.331106	FALSE	CG9578
FBtr0070026	28.6676	28.864	29.0851	28.9617	28.5756	28.7608	28.7073	28.6956	0.212015	0.621105	0.209759	FALSE	CG9581
FBtr0333549;FBtr0303258;FBtr0070028;FBtr0333548	27.0829	27.1844	27.5402	26.8876	27.361	27.9534	27.4374	27.3259	0.331486	0.538495	-0.345645	FALSE	Rab35
FBtr0070038	27.1468	28.0745	27.2137	26.1539	26.622	27.3714	26.8686	27.3349	0.860493	0.0860624	0.0980349	FALSE	alpha-Cat
FBtr0331408;FBtr0070041;FBtr0070040	33.3644	33.6586	33.8361	33.5434	34.1463	34.1634	33.8766	33.8784	0.0759759	0.747813	-0.415538	FALSE	CG32230
FBtr0345139;FBtr0345138;FBtr0344974;FBtr0111141;FBtr0070044;FBtr0070043;FBtr0070042	32.1095	32.2214	31.9852	32.2418	31.2028	31.4732	31.0304	31.2519	0.0022704	0.896988	0.899882	FALSE	CkIIalpha
FBtr0070045	25.9288	27.096	26.793	26.1387	25.2753	23.0236	24.7613	21.8798	0.0717138	0.752511	2.75415	FALSE	CG33217
FBtr0070046	21.8798	21.8798	21.8798	21.8798	21.8798	21.8798	21.8798	21.8798	0.421923	0	0	FALSE	CG32350
FBtr0070057;FBtr0070053;FBtr0070050;FBtr0345920;FBtr0070056;FBtr0070054;FBtr0070051	21.8798	21.8798	21.8798	21.8798	29.1185	28.8414	29.2323	29.0914	3.10197e-08	0.935046	-7.1911	TRUE	CG17450;CG32820;CG32819
FBtr0077374;FBtr0070055;FBtr0070052	29.4683	29.3648	28.9103	29.1738	28.754	29.0385	28.9157	29.3224	0.421923	0.436464	0.221655	FALSE	CG32500;CG33502;CG32857
FBtr0070062;FBtr0070061;FBtr0070060;FBtr0070059;FBtr0070058	32.338	32.6506	32.3119	32.4242	31.8173	31.8495	31.9261	31.6941	0.00547425	0.878651	0.609423	FALSE	CG14476
FBtr0070063;FBtr0332992	21.8798	21.8798	21.8798	21.8798	21.8798	21.8798	21.8798	21.8798	0.421923	0	0	FALSE	G9a
FBtr0070065;FBtr0070064	29.3866	29.0794	29.6234	29.1819	28.8062	26.2175	27.5709	28.1231	0.104452	0.716215	1.63839	FALSE	cin
FBtr0344149;FBtr0342962;FBtr0070068;FBtr0070067;FBtr0070066	21.8798	21.8798	21.8798	21.8798	21.8798	21.8798	21.8798	21.8798	0.421923	0	0	FALSE	CG3777
FBtr0070069	21.8798	21.8798	21.8798	21.8798	28.2974	27.7219	27.667	23.5855	0.0243539	0.823376	-4.93814	FALSE	CG12470
FBtr0070071	27.1559	24.9281	26.0165	26.0156	25.13	26.5515	24.2295	22.8056	0.404902	0.485167	1.3499	FALSE	y
FBtr0070079	25.8646	26.3893	25.9997	24.0913	23.9794	26.1767	25.9112	26.0265	0.947204	0.0329628	0.0627916	FALSE	CG3156
FBtr0070088	28.6162	28.0378	28.5324	28.4925	28.0907	28.5201	28.586	28.6283	0.87338	0.0774161	-0.0365112	FALSE	arg
FBtr0334033;FBtr0100476;FBtr0100475;FBtr0070090;FBtr0070089	21.8798	22.8502	21.8798	23.466	21.8798	22.9171	21.8798	21.8798	0.515556	0.294095	0.379849	FALSE	CG4293
FBtr0114366;FBtr0100254;FBtr0307173;FBtr0070091	26.3492	26.5969	27.057	26.4414	25.0484	26.9316	27.1108	26.9063	0.864922	0.0833483	0.111876	FALSE	elav
FBtr0070093;FBtr0070092	32.4899	32.5204	32.3073	32.5735	32.6887	32.4415	32.8976	32.8264	0.233257	0.604844	-0.240774	FALSE	CG17896
FBtr0070094	21.8798	27.778	24.889	21.8798	21.8798	21.8798	21.8798	21.8798	0.371129	0.505756	2.22685	FALSE	CG18273
FBtr0070098;FBtr0339442;FBtr0339443	21.8798	21.8798	21.8798	21.8798	21.8798	21.8798	21.8798	21.8798	0.421923	0	0	FALSE	ebo
FBtr0070099	34.21	34.7392	34.6639	33.327	36.1144	36.1698	35.7306	36.248	0.0136004	0.849619	-1.83066	FALSE	Cyp4g1
FBtr0070100	21.8798	21.8798	21.8798	21.8798	21.8798	21.8798	21.8798	21.8798	0.421923	0	0	FALSE	pcl
FBtr0070107;FBtr0070108;FBtr0340207	21.8798	21.8798	21.8798	21.8798	21.8798	21.8798	21.8798	21.8798	0.421923	0	0	FALSE	CG3038
FBtr0307292;FBtr0307294;FBtr0070109;FBtr0307295;FBtr0307293;FBtr0307291	21.8798	21.8798	21.8798	21.8798	21.8798	21.8798	21.8798	21.8798	0.421923	0	0	FALSE	Appl
FBtr0070115	28.4974	27.1612	27.6779	28.3806	28.3225	28.2167	28.5402	28.5672	0.405394	0.484898	-0.48235	FALSE	CG13369
FBtr0070117;FBtr0070118;FBtr0070116	21.8798	21.8798	21.8798	21.8798	21.8798	21.8798	21.8798	21.8798	0.421923	0	0	FALSE	CG17829
FBtr0070119	26.6323	27.2017	26.6579	25.7211	24.5097	21.8798	21.8798	21.8798	0.0118037	0.85539	4.01598	FALSE	l(1)1Bi
FBtr0340081;FBtr0340082;FBtr0070120	21.8798	21.8798	21.8798	21.8798	21.8798	21.8798	21.8798	21.8798	0.421923	0	0	FALSE	su(s)
FBtr0343564;FBtr0070122;FBtr0308651	24.6466	24.6436	21.8798	21.8798	21.8798	21.8798	21.8798	21.8798	0.331486	0.540062	1.38266	FALSE	Roc1a
FBtr0345314;FBtr0100530;FBtr0070129;FBtr0070128;FBtr0070127;FBtr0070126;FBtr0070125;FBtr0070124;FBtr0070123	30.0977	29.3218	29.5701	30.4585	29.0386	29.1205	29.4646	28.9327	0.142949	0.67752	0.722971	FALSE	SkpA
FBtr0340197;FBtr0340196;FBtr0302260;FBtr0302259;FBtr0070133;FBtr0070132;FBtr0070130;FBtr0070131;FBtr0340195	26.0812	22.989	21.8798	22.8209	21.8798	21.8798	21.8798	21.8798	0.33207	0.535952	1.56293	FALSE	sdk
FBtr0070134;FBtr0343759	28.4744	28.2341	28.4749	27.1582	29.3832	29.7564	29.7968	29.4881	0.0231271	0.825934	-1.52073	FALSE	CG5254
FBtr0335403;FBtr0070139	21.8798	21.8798	21.8798	21.8798	21.8798	21.8798	21.8798	21.8798	0.421923	0	0	FALSE	tw
FBtr0343325;FBtr0070140	21.8798	21.8798	21.8611	21.8798	21.8798	21.8798	21.8798	21.8798	0.421923	0.353553	-0.00467247	FALSE	CG16989
FBtr0070141;FBtr0310162	28.4909	28.6611	28.9897	28.627	29.5504	29.3814	29.0105	29.5479	0.0351027	0.803888	-0.680404	FALSE	Sec22
FBtr0070146	21.8798	21.8798	21.8798	21.8798	25.7501	26.3392	26.5105	23.9824	0.00619325	0.875614	-3.76576	TRUE	Rbf
FBtr0070147	21.8798	21.8798	21.8798	21.8798	21.8798	21.8798	21.8798	21.8798	0.421923	0	0	FALSE	CG13360
FBtr0070148	32.4862	32.0136	32.1907	33.7206	32.5005	32.2739	32.7598	31.9056	0.648057	0.212182	0.242802	FALSE	RpL22
FBtr0070150	21.8798	21.8798	21.8798	21.8798	21.8798	21.8798	21.8798	21.8798	0.421923	0	0	FALSE	CG13362
FBtr0345321;FBtr0070158;FBtr0070157;FBtr0070156;FBtr0070155	32.1508	32.3137	31.9952	33.0007	31.2675	31.4202	31.4544	31.2104	0.0255688	0.82068	1.02698	FALSE	RpL36
FBtr0070160	25.81	21.8798	24.1065	21.8798	21.8798	21.8798	21.8798	21.8798	0.357052	0.514447	1.53923	FALSE	CG13365
FBtr0339434;FBtr0339431;FBtr0339432;FBtr0070161;FBtr0339433;FBtr0339430;FBtr0110791	21.8798	25.0763	21.8798	23.2095	21.8798	21.8798	21.8798	21.8798	0.400523	0.487589	1.13156	FALSE	CG13366
FBtr0310165;FBtr0070164	21.8798	21.8798	21.8798	21.8798	25.4837	22.4615	23.7676	21.8798	0.279899	0.573198	-1.51837	FALSE	CG11663
FBtr0070165	21.8798	22.3208	21.8798	23.7428	21.8798	25.3736	21.8798	24.4012	0.454027	0.333072	-0.927782	FALSE	MED22
FBtr0332589;FBtr0307182;FBtr0070169;FBtr0070168;FBtr0070167	24.227	23.819	24.257	21.8798	23.0793	23.4577	23.0161	23.8296	0.789639	0.127214	0.200023	FALSE	TRAM
FBtr0070173	21.8798	21.8798	21.8798	21.8798	21.8798	21.8798	21.8798	21.8798	0.421923	0	0	FALSE	CG3021
FBtr0070175	28.219	27.3813	27.5436	28.3667	27.1877	27.9885	27.9367	28.3489	0.978518	0.0134815	0.0121745	FALSE	CG14630
FBtr0070176;FBtr0302884	21.8798	21.8798	21.8798	21.8798	21.8798	21.8798	21.8798	21.8798	0.421923	0	0	FALSE	su(w[a])
FBtr0070179	30.0184	28.9937	29.2627	30.7734	29.6446	29.7518	30.6142	29.7492	0.758445	0.145801	-0.177897	FALSE	CG14629
FBtr0331340;FBtr0113327;FBtr0070181;FBtr0331339	24.8246	21.8798	21.8798	22.5113	21.8798	21.8798	21.8798	21.8798	0.421923	0.432688	0.894081	FALSE	CG3655
FBtr0070182	21.8798	21.8798	21.8798	21.8798	21.8798	21.8798	21.8798	21.8798	0.421923	0	0	FALSE	CDC45L
FBtr0342734;FBtr0070185	21.8798	21.8798	21.8798	21.8798	22.6165	25.0769	23.1587	24.136	0.0641248	0.761675	-1.86725	FALSE	CG3690
FBtr0070186	31.9506	31.5963	31.8562	31.1441	33.2481	33.2572	33.5697	33.591	0.00180495	0.900632	-1.77969	FALSE	CG3699
FBtr0070188	27.631	27.7871	26.5724	27.883	21.8798	24.1299	21.8798	23.7974	0.00544578	0.878784	4.54671	TRUE	CG3704
FBtr0070189	21.8798	21.8798	24.1173	21.8798	21.8798	21.8798	21.8798	21.8798	0.421923	0.353553	0.559377	FALSE	CG3706
FBtr0345513;FBtr0310611;FBtr0070197	27.0467	25.5246	26.7723	29.5185	28.204	27.8475	28.8833	28.1939	0.421923	0.421118	-1.06668	FALSE	CG11378
FBtr0070200	21.8798	21.8798	21.8798	21.8798	21.8798	21.8798	21.8798	21.8798	0.421923	0	0	FALSE	CG14626
FBtr0345506;FBtr0070201	21.8798	21.8798	21.8798	21.8798	21.8798	21.8798	21.8798	21.8798	0.421923	0	0	FALSE	CG11380
FBtr0070202	21.8798	21.8798	21.8798	21.8798	21.8798	21.8798	21.8798	21.8798	0.421923	0	0	FALSE	CG14625
FBtr0070203	30.0028	28.6578	29.0488	31.4558	21.8798	21.8798	21.8798	21.8798	0.000306088	0.918506	7.91151	TRUE	CG11381
FBtr0070204	21.8798	21.8798	21.8798	21.8798	21.8798	21.8798	21.8798	21.8798	0.421923	0	0	FALSE	CG14624
FBtr0342728;FBtr0070205	21.8798	21.8798	21.8798	22.8835	21.8798	21.8798	21.8798	21.8798	0.421923	0.353553	0.250937	FALSE	CG11382
FBtr0070207	29.1684	28.8785	28.3872	29.6572	21.8798	21.8798	21.8798	21.8798	7.02396e-06	0.93155	7.14304	TRUE	fs(1)N
FBtr0310619;FBtr0070209	21.8798	21.8798	23.1689	21.8798	21.8798	21.8798	21.8798	21.8798	0.421923	0.353553	0.322285	FALSE	CG11412
FBtr0070212	21.8798	21.8798	21.8798	21.8798	21.8798	21.8798	21.8798	21.8798	0.421923	0	0	FALSE	CG11417
FBtr0070213	21.8798	21.8798	21.8798	21.8798	21.8798	21.8798	21.8798	21.8798	0.421923	0	0	FALSE	CG14770
FBtr0339774;FBtr0070215;FBtr0339773	27.2914	27.0648	21.8694	27.6922	26.5321	25.1955	26.8507	26.0918	0.918894	0.0504181	-0.188053	FALSE	ssx
FBtr0070218;FBtr0070217;FBtr0070216	26.2092	27.2231	27.1228	26.0658	26.8361	26.9282	26.7407	26.5522	0.78087	0.132338	-0.109072	FALSE	AMPKalpha
FBtr0070225;FBtr0332291;FBtr0332292	24.0425	25.4043	21.8798	21.8798	21.1626	24.9128	21.8798	21.8798	0.574933	0.257107	0.84286	FALSE	CG11448
FBtr0070230	28.2845	28.6238	28.575	27.2661	28.7005	28.3425	27.459	28.3387	0.965728	0.0211316	-0.0228088	FALSE	CG14786
FBtr0070233	28.0648	27.8416	28.1567	28.5013	27.7176	28.0159	28.2383	28.1969	0.661831	0.20357	0.0989538	FALSE	CG3719
FBtr0070234	23.4732	21.8798	23.9283	24.5663	21.8798	21.8798	21.8798	21.8798	0.120748	0.699724	1.58213	FALSE	png
FBtr0332287;FBtr0342738;FBtr0070235	21.8798	21.8798	21.8798	21.8798	21.8798	21.8798	21.8798	21.8798	0.421923	0	0	FALSE	CG12773
FBtr0332288;FBtr0070236	22.0743	26.3104	26.247	23.5772	23.6591	21.8798	21.8798	23.3778	0.356567	0.515132	1.85315	FALSE	CG11418
FBtr0342730;FBtr0070238	21.8798	21.8798	21.8798	21.8798	21.8798	21.8798	21.8798	21.8798	0.421923	0	0	FALSE	CG11409
FBtr0070241;FBtr0342731;FBtr0310283;FBtr0310282;FBtr0070239;FBtr0303264	21.8798	21.8798	21.8798	21.8798	21.8798	21.8798	21.8798	21.8798	0.421923	0	0	FALSE	DAAM
FBtr0070245	23.4942	23.5196	21.8798	21.8798	21.8798	21.8798	21.8798	21.8798	0.331486	0.54004	0.813573	FALSE	CG11403
FBtr0070251	21.8798	21.8798	21.8798	21.8798	21.8798	21.8798	21.8798	21.8798	0.421923	0	0	FALSE	CG11384
FBtr0345508;FBtr0339577;FBtr0339576;FBtr0300352;FBtr0070253	24.1868	22.4744	23.6956	21.8798	21.8798	22.6849	22.3396	23.457	0.550086	0.272592	0.468851	FALSE	CG14777
FBtr0070256;FBtr0070255	21.8798	21.8798	21.8798	21.8798	21.8798	21.8798	21.8798	21.8798	0.421923	0	0	FALSE	pck
FBtr0070258;FBtr0339588	24.7983	21.8798	21.8798	24.1381	21.8798	21.8798	21.8798	21.8798	0.333404	0.5343	1.29423	FALSE	mei-38
FBtr0339589;FBtr0070259	26.5894	27.1071	27.2262	26.4576	27.381	26.9978	26.6688	26.5759	0.857429	0.0879978	-0.0608278	FALSE	rush
FBtr0339591;FBtr0339590;FBtr0070260	21.8798	21.8798	21.8798	24.2546	21.8798	21.8798	21.8798	21.8798	0.421923	0.353553	0.593713	FALSE	inc
FBtr0332293;FBtr0300428;FBtr0300427;FBtr0070263;FBtr0070261;FBtr0330406	21.8798	21.8798	21.8798	21.8798	21.8798	21.8798	21.8798	21.8798	0.421923	0	0	FALSE	br
FBtr0070269	21.8798	21.684	25.5612	21.8798	21.8798	26.0705	21.8798	21.8798	0.923382	0.0478075	-0.17626	FALSE	dor
FBtr0333115;FBtr0070270	21.8798	21.8798	21.8798	21.8798	21.8798	21.8798	21.8798	21.8798	0.421923	0	0	FALSE	hfw
FBtr0070272	21.8798	21.8798	21.8798	21.8798	21.8798	21.8798	21.8798	21.8798	0.421923	0	0	FALSE	b6
FBtr0343517;FBtr0070284;FBtr0303587	28.895	28.3939	28.8143	30.5885	21.8798	21.8798	21.8798	21.8798	0.000132528	0.923271	7.29314	TRUE	Mur2B
FBtr0339594;FBtr0339593;FBtr0070290;FBtr0070289	34.1876	34.1749	34.0027	34.2424	32.9242	32.9018	33.2302	33.2312	0.00090892	0.909759	1.08004	FALSE	sta
FBtr0070296	21.8798	21.8798	21.8798	21.8798	21.8798	21.8798	21.8798	21.8798	0.421923	0	0	FALSE	O-fut2
FBtr0339578;FBtr0070297	28.1804	27.9313	27.7268	28.7286	21.8798	21.8798	21.8798	21.8798	4.78309e-06	0.932078	6.26202	TRUE	Ns3
FBtr0070298	21.8798	21.8798	21.8798	21.8798	21.8798	21.8798	21.8798	21.8798	0.421923	0	0	FALSE	CG14787
FBtr0305499;FBtr0070300;FBtr0309961;FBtr0070299;FBtr0305498;FBtr0307895;FBtr0339272	21.8798	21.8798	21.8798	21.8798	21.8798	21.8798	21.8798	21.8798	0.421923	0	0	FALSE	Adar
FBtr0070308	24.1087	23.8329	23.3697	25.0851	21.8798	21.8798	21.8798	21.8798	0.00790461	0.86855	2.21932	TRUE	MED18
FBtr0339600;FBtr0070310	21.8798	21.8798	21.8798	21.8798	21.8798	21.8798	21.8798	21.8798	0.421923	0	0	FALSE	CG14803
FBtr0070311	26.0756	26.3177	26.7307	26.9154	27.1609	27.5258	27.8129	27.615	0.0287908	0.814485	-1.01883	FALSE	Vps26
FBtr0070312	26.0009	25.9613	25.8194	25.7613	21.8798	24.1021	21.8798	21.8798	0.00763681	0.869561	3.45037	TRUE	CG14805
FBtr0331384;FBtr0070313	21.8798	21.8798	21.8798	21.8798	21.8798	21.8798	21.8798	21.8798	0.421923	0	0	FALSE	CG14806
FBtr0332579;FBtr0070314	28.294	27.4113	27.3882	27.3291	27.208	26.2726	26.0838	23.8459	0.179983	0.646299	1.75308	FALSE	mRpL16
FBtr0070315	24.5432	24.2807	21.8798	21.8798	21.8798	21.8798	21.8798	21.8798	0.331486	0.539097	1.26607	FALSE	mip130
FBtr0344155;FBtr0070316	28.6186	28.986	28.7833	27.8596	29.3807	29.2433	28.7643	29.1404	0.241559	0.599172	-0.570297	FALSE	Rbcn-3B
FBtr0332586;FBtr0070317	21.8798	21.8798	23.6182	21.8798	21.8798	22.9028	21.8798	21.8798	0.778422	0.13405	0.178859	FALSE	Ocrl
FBtr0070319;FBtr0070318;FBtr0332588;FBtr0332587;FBtr0070320	26.0551	25.9576	26.1505	25.4308	21.8798	21.8798	21.8798	21.8798	9.99006e-06	0.930954	4.01871	TRUE	CG11596
FBtr0070321	21.5598	23.086	21.8798	23.3248	21.8798	23.9865	21.8798	23.9291	0.622137	0.227714	-0.456164	FALSE	CG3587
FBtr0070328	21.8798	21.8798	21.8798	21.8798	21.8798	21.8798	21.8798	21.8798	0.421923	0	0	FALSE	CG4194
FBtr0344156;FBtr0070330	21.8798	21.8798	21.8798	21.8798	21.8798	21.8798	21.8798	21.8798	0.421923	0	0	FALSE	CG4061
FBtr0070331	27.7174	27.3189	27.2689	26.1224	20.6236	26.2868	22.2461	22.8035	0.071683	0.752587	4.11691	FALSE	CG4045
FBtr0302435;FBtr0300255;FBtr0300254;FBtr0070336;FBtr0070335;FBtr0070334;FBtr0070337	29.6989	29.3711	29.5656	28.9167	29.6714	29.7198	29.5632	30.0347	0.307644	0.555522	-0.359203	FALSE	CG4199
FBtr0070339	21.8798	21.8798	21.8798	21.8798	21.8798	21.8798	21.8798	21.8798	0.421923	0	0	FALSE	CG4281
FBtr0070344;FBtr0310657	21.8798	23.5761	25.6144	23.3291	21.8798	21.8798	21.8798	21.8798	0.199903	0.630892	1.72007	FALSE	Actn
FBtr0333802;FBtr0310659;FBtr0310658;FBtr0070345	22.6439	27.1162	24.0567	26.498	23.8123	24.0036	22.1728	23.5062	0.393653	0.492164	1.70497	FALSE	Actn
FBtr0333803;FBtr0070346	23.8901	23.1288	21.8798	21.8798	21.8798	21.8798	21.8798	21.8798	0.347971	0.521432	0.814848	FALSE	usp
FBtr0070347	23.7764	24.2468	23.401	23.1627	23.3295	21.8798	21.8798	23.2083	0.187435	0.640308	1.07238	FALSE	CG4406
FBtr0070349	24.0913	25.1055	21.8798	21.8798	21.8798	21.8798	21.8798	21.8798	0.340597	0.527956	1.35931	FALSE	CG3857
FBtr0070351;FBtr0070350	28.0035	27.9887	27.973	27.772	27.5892	26.269	25.8245	27.1315	0.0939997	0.728541	1.23073	FALSE	eIF2B-epsilon
FBtr0305583;FBtr0070354;FBtr0070353;FBtr0070352;FBtr0332580	21.8798	21.8798	21.8798	21.8798	21.8798	21.8798	21.8798	21.8798	0.421923	0	0	FALSE	Edem1
FBtr0070362;FBtr0070363	21.8798	21.8798	21.8798	21.8798	21.8798	21.8798	21.8798	21.8798	0.421923	0	0	FALSE	trr
FBtr0345510;FBtr0070365	28.8478	26.6225	28.2388	29.2949	27.0651	25.7373	26.3169	26.8102	0.127033	0.693455	1.76863	FALSE	CG14817
FBtr0070366;FBtr0339601	29.2463	28.9825	29.1464	28.8877	28.5945	28.4116	28.6335	28.1404	0.0253846	0.821103	0.620723	FALSE	Pgam5
FBtr0070367;FBtr0070368	21.8798	21.8798	21.8798	21.8798	21.8798	21.8798	21.8798	21.8798	0.421923	0	0	FALSE	Pex5
FBtr0070369;FBtr0339494;FBtr0070370	21.8798	21.8798	21.8798	21.8798	21.8798	21.8798	21.8798	21.8798	0.421923	0	0	FALSE	CG14814
FBtr0301926;FBtr0070371	30.4169	30.6333	30.4245	30.0335	30.5847	30.4684	30.0526	30.2663	0.876478	0.0757514	0.0340792	FALSE	deltaCOP
FBtr0333511;FBtr0070372	23.2553	23.679	22.2442	26.9898	23.4247	21.8798	24.7636	24.1983	0.753028	0.149004	0.475501	FALSE	CG14812
FBtr0333754;FBtr0070377;FBtr0070376;FBtr0333755	21.8798	21.8798	21.8798	21.8798	21.8798	21.8798	21.8798	21.8798	0.421923	0	0	FALSE	Unc-76
FBtr0070378;FBtr0333260	23.7729	25.9859	21.8798	25.4201	21.8798	21.8798	21.8798	21.8798	0.141613	0.678787	2.38489	FALSE	csw
FBtr0070383;FBtr0070382;FBtr0070381	31.5426	31.4701	31.5298	31.5934	32.5049	32.5899	33.1123	32.8474	0.00173448	0.901276	-1.22964	FALSE	CG3835
FBtr0331410;FBtr0070384	32.1102	32.2446	32.242	31.3375	32.9094	33.0798	32.8801	33.1472	0.0253116	0.82132	-1.02056	FALSE	Pgd
FBtr0310501;FBtr0310500;FBtr0070385	23.0583	21.8798	21.8798	25.1235	24.681	23.9203	23.5274	21.8798	0.668	0.199418	-0.516802	FALSE	CG3630
FBtr0343049;FBtr0070386	32.1397	31.3107	31.912	32.2514	32.116	32.1646	32.2951	32.0617	0.421923	0.407734	-0.255855	FALSE	CG3621
FBtr0345609;FBtr0070387	25.2146	26.8469	25.7588	21.8798	26.8365	27.6375	27.1229	27.81	0.203166	0.627974	-2.42674	FALSE	Cyp4d2
FBtr0070389	28.2201	28.2004	27.9853	28.1533	27.8123	28.2651	28.4338	28.1899	0.844671	0.0952106	-0.0355207	FALSE	pn
FBtr0345607;FBtr0070390	24.5471	22.3836	24.5139	23.8295	24.4555	23.9464	24.7978	23.6703	0.571981	0.258847	-0.399001	FALSE	CG17776
FBtr0342765;FBtr0070393	21.8798	21.8798	21.8798	21.8798	21.8798	21.8798	21.8798	21.8798	0.421923	0	0	FALSE	Mct1
FBtr0070396	21.8798	21.8798	21.8798	21.8798	21.8798	21.8798	21.8798	23.7606	0.421923	0.353553	-0.470208	FALSE	fs(1)K10
FBtr0070398	24.1972	24.3096	26.0708	24.5073	21.8798	21.8798	21.8798	21.8798	0.00586475	0.877014	2.89146	TRUE	CG3071
FBtr0344007;FBtr0070401	21.8798	21.8798	21.8798	21.8798	21.8798	21.8798	21.8798	21.8798	0.421923	0	0	FALSE	phl
FBtr0307285;FBtr0307284;FBtr0070404;FBtr0070403;FBtr0070402;FBtr0343597	26.3129	23.2279	26.3925	26.8289	24.4833	24.2001	21.8798	23.9053	0.242596	0.598113	2.07343	FALSE	ptr
FBtr0333730;FBtr0070405	28.4363	27.1133	23.0297	27.0364	22.1023	29.1634	29.4507	29.3485	0.67861	0.193177	-1.11228	FALSE	mRpL14
FBtr0300792;FBtr0070411	31.6861	31.8534	31.7509	31.66	31.7026	31.9544	31.5036	31.6902	0.848918	0.0927015	0.0249024	FALSE	CG2918
FBtr0346648;FBtr0345315;FBtr0300793;FBtr0070412	21.8798	21.8798	21.8798	21.8798	21.8798	21.8798	21.8798	21.8798	0.421923	0	0	FALSE	CG2924
FBtr0345316;FBtr0070414	21.8798	21.8798	21.8798	21.8798	21.8798	21.8798	21.8798	21.8798	0.421923	0	0	FALSE	temp
FBtr0342767;FBtr0070416	27.0109	27.3397	27.0288	26.8054	27.2765	27.6154	27.6109	27.7402	0.0623893	0.764042	-0.514559	FALSE	CG3091
FBtr0342768;FBtr0070417	26.7209	27.0235	26.4809	26.2712	25.8154	26.244	24.7583	26.3984	0.243613	0.59724	0.820068	FALSE	CG3191
FBtr0070418	25.4037	24.067	23.7402	24.2632	21.8798	21.8798	21.8798	21.8798	0.00488266	0.881287	2.48873	TRUE	crn
FBtr0342769;FBtr0070419	22.3699	24.175	23.1636	21.8798	21.8798	21.8798	21.8798	21.8798	0.244414	0.596684	1.0173	FALSE	kz
FBtr0342771;FBtr0342770;FBtr0070420	33.198	33.1736	32.9984	33.3118	33.0799	32.9725	33.0535	32.9744	0.220065	0.614994	0.150367	FALSE	Vinc
FBtr0070421	21.8798	21.8798	23.347	21.8798	21.8798	21.8798	21.8798	21.8798	0.421923	0.353553	0.3668	FALSE	msta
FBtr0345599;FBtr0070422	21.8798	24.087	21.8798	21.8798	21.8798	21.8798	21.8798	21.8798	0.421923	0.353553	0.551805	FALSE	msta
FBtr0070423	21.8798	25.5651	21.8798	21.8798	27.8561	27.663	27.2113	28.0807	0.0146152	0.84671	-4.90167	FALSE	CG18031
FBtr0070425	25.4801	26.0924	26.413	25.6866	21.8798	21.8798	21.8798	21.8798	3.71649e-05	0.928036	4.03826	TRUE	Nmd3
FBtr0070426;FBtr0310077	25.3185	25.4933	25.1984	24.2596	27.3391	28.2617	27.7281	27.9475	0.00243133	0.8959	-2.75165	TRUE	Cyp4d14
FBtr0070427	21.8798	21.8798	21.8798	21.8798	21.8798	21.8798	21.8798	21.8798	0.421923	0	0	FALSE	Cyp4d1
FBtr0070428	21.8798	21.8798	21.8798	21.8798	21.8798	21.8798	21.8798	21.8798	0.421923	0	0	FALSE	Cyp4d1
FBtr0070430;FBtr0344159;FBtr0070429	21.8798	21.8798	21.8798	21.8798	21.8798	21.8798	21.8798	21.8798	0.421923	0	0	FALSE	wapl
FBtr0070431	29.1522	28.7116	28.9838	28.8218	28.7301	29.1466	28.7431	29.1703	0.879559	0.0739619	-0.0301705	FALSE	bcn92
FBtr0070432;FBtr0345598;FBtr0343589;FBtr0301515;FBtr0070433;FBtr0112843	21.8798	21.8798	21.8798	21.8798	21.8798	21.8798	21.8798	21.8798	0.421923	0	0	FALSE	ph-p;ph-d
FBtr0070434	21.8798	21.8798	21.8798	21.8798	21.8798	21.8798	21.8798	21.8798	0.421923	0	0	FALSE	CG16903
FBtr0100380;FBtr0070435;FBtr0331161	21.8798	21.8798	21.8798	21.8798	21.8798	21.8798	21.8798	21.8798	0.421923	0	0	FALSE	z
FBtr0302449;FBtr0302448;FBtr0302447;FBtr0070437	21.8798	21.8798	21.8798	21.8798	28.1573	29.0468	28.2866	28.8264	3.19283e-06	0.932596	-6.69948	TRUE	CG13759
FBtr0308566;FBtr0070438	27.4398	23.9535	27.2534	27.0435	23.143	26.3607	21.8798	21.8798	0.184979	0.642353	3.10677	FALSE	wds
FBtr0070441	25.5704	26.5936	25.615	26.6759	21.8798	21.8798	21.8798	21.8798	0.000184553	0.921508	4.23394	TRUE	Zw10
FBtr0070442	23.3169	21.8798	24.1926	21.8798	21.8798	21.8798	21.8798	21.8798	0.347971	0.521435	0.937492	FALSE	Seipin
FBtr0307159;FBtr0070445	21.8798	21.8798	21.8798	21.8798	21.8798	21.8798	21.8798	21.8798	0.421923	0	0	FALSE	Tsp3A
FBtr0070446	30.5166	30.0101	30.0045	31.0111	29.1206	29.1644	29.4095	29.0444	0.0206763	0.831109	1.20084	FALSE	CG8636
FBtr0340093;FBtr0070448	27.9887	26.8583	27.2671	28.6084	21.8798	21.8798	21.8798	21.8798	0.000136054	0.923131	5.80088	TRUE	Klp3A
FBtr0303887;FBtr0303886;FBtr0070457;FBtr0334883	21.8798	21.8798	21.8798	21.8798	21.8798	21.8798	21.8798	21.8798	0.421923	0	0	FALSE	boi
FBtr0070459;FBtr0308831	27.657	27.9489	28.0881	27.109	27.496	26.9657	24.7665	26.707	0.274274	0.577116	1.21694	FALSE	tko
FBtr0070473;FBtr0070472;FBtr0070470;FBtr0070469;FBtr0070468;FBtr0070466;FBtr0070474;FBtr0070467;FBtr0070475;FBtr0301966;FBtr0070476;FBtr0302185	23.5208	24.6601	23.7343	22.683	21.8798	24.3	24.7056	23.1545	0.885377	0.0705143	0.139568	FALSE	sgg
FBtr0070479	27.5367	26.4594	26.8803	26.6064	27.3663	27.1633	26.66	26.308	0.99325	0.00417778	-0.00370306	FALSE	eIF2B-beta
FBtr0070480	21.8798	21.8798	21.8798	21.8798	27.0434	23.5123	24.6151	22.5904	0.13204	0.688516	-2.56053	FALSE	CG2681
FBtr0070485	21.8798	23.372	21.8798	23.1417	21.8798	21.8798	21.8798	21.8798	0.33159	0.537563	0.688547	FALSE	fs(1)Ya
FBtr0070490	21.8798	21.8798	24.0623	21.8798	22.8644	22.8027	21.8798	23.0011	0.780282	0.132729	-0.211587	FALSE	w
FBtr0345318;FBtr0309881;FBtr0070493;FBtr0070492;FBtr0070491	24.0763	26.8112	24.5314	21.8798	26.5982	27.0093	26.3952	25.5031	0.269582	0.58004	-2.05178	FALSE	CG32795
FBtr0332496;FBtr0070494	21.8798	21.8798	21.8798	22.9601	24.1568	21.8798	21.8798	21.8798	0.70382	0.17802	-0.299189	FALSE	Syx4
FBtr0347024;FBtr0070497	29.7986	29.8373	29.897	29.4351	29.7696	29.46	29.8224	29.6935	0.735759	0.159298	0.0556301	FALSE	ttm50
FBtr0070498	21.8798	21.8798	21.8798	21.8798	21.8798	21.8798	21.8798	21.8798	0.421923	0	0	FALSE	CG2701
FBtr0070499	21.8798	21.8798	21.8798	21.8798	21.8798	21.8798	21.8798	21.8798	0.421923	0	0	FALSE	CG2685
FBtr0345710;FBtr0070501;FBtr0273276	21.8798	21.8798	21.8798	21.8798	21.8798	21.8798	21.8798	21.8798	0.421923	0	0	FALSE	Csat
FBtr0345716;FBtr0070502	28.7288	28.696	28.5527	28.4129	28.7003	28.4903	28.5144	28.8483	0.77132	0.138468	-0.0407463	FALSE	CG2658
FBtr0070504	22.8841	23.4395	24.0872	23.7502	22.5742	23.8411	23.1202	24.4184	0.933782	0.0412904	0.0517605	FALSE	CG2650
FBtr0304659;FBtr0070507	21.8798	21.8798	21.8798	21.8798	21.8798	21.8798	21.8798	21.8798	0.421923	0	0	FALSE	N
FBtr0343600;FBtr0070508	29.1325	29.0875	29.1336	29.6107	27.9937	28.4717	28.1892	28.0236	0.00630252	0.875105	1.07157	FALSE	CG3939
FBtr0070515;FBtr0070513;FBtr0070511;FBtr0070512	22.3116	24.969	24.0204	21.8798	25.3588	22.465	25.5381	25.0977	0.421923	0.435866	-1.31968	FALSE	dnc
FBtr0070542	23.5476	23.6059	21.8798	27.7121	21.8798	21.8798	21.8798	21.8798	0.292015	0.565284	2.30657	FALSE	Fcp3C
FBtr0345708;FBtr0070543	21.8798	26.06	23.7485	26.9693	26.9564	26.7615	21.8798	27.5271	0.607444	0.236696	-1.1168	FALSE	CG18508
FBtr0070550	21.8798	21.8798	21.8798	21.8798	21.8798	21.8798	21.8798	21.8798	0.421923	0	0	FALSE	CG32793
FBtr0070552	21.8798	21.8798	21.8798	21.8798	21.8798	21.8798	21.8798	21.8798	0.421923	0	0	FALSE	CG3598
FBtr0070554	21.8798	21.8798	21.8798	21.8798	21.8798	21.8798	21.8798	21.8798	0.421923	0	0	FALSE	CG14421
FBtr0070555	21.8798	21.8798	21.8798	21.8798	21.8798	21.8798	21.8798	21.8798	0.421923	0	0	FALSE	CG14422
FBtr0070556	21.8798	21.8798	21.8798	21.8798	21.8798	21.8798	21.8798	21.8798	0.421923	0	0	FALSE	CG14423
FBtr0332493;FBtr0070558	29.7075	29.3945	29.2647	29.2873	30.0841	30.3347	30.9242	30.9425	0.0190149	0.835389	-1.15788	FALSE	CG3603
FBtr0343758;FBtr0070562	22.9204	22.5672	21.4229	22.3763	21.8798	21.8798	21.8798	21.8798	0.421923	0.459267	0.441907	FALSE	rst
FBtr0070563	21.8798	21.8798	21.8798	21.8798	21.8798	21.8798	21.8798	21.8798	0.421923	0	0	FALSE	CG14424
FBtr0070564	21.8798	21.8798	21.8798	21.8798	21.8798	21.8798	21.8798	21.8798	0.421923	0	0	FALSE	CG14419
FBtr0331609;FBtr0070568	27.5322	28.2748	28.1268	27.0164	27.9391	27.8158	27.3292	27.741	0.939549	0.0375464	0.0312712	FALSE	CG10802
FBtr0331612;FBtr0331611;FBtr0331610;FBtr0332285;FBtr0070569	21.8798	21.8798	21.8798	21.8798	21.8798	21.8798	21.8798	21.8798	0.421923	0	0	FALSE	CG10803
FBtr0070582	22.4268	22.7529	22.1991	21.4615	22.4444	23.0964	23.0523	24.5697	0.240992	0.599593	-1.08062	FALSE	Rala
FBtr0070584;FBtr0070583	26.674	23.6825	26.6264	26.347	23.9029	24.9989	22.5333	25.0065	0.293248	0.564606	1.72205	FALSE	Rala
FBtr0070586;FBtr0333793;FBtr0070587	22.1204	21.8798	22.6025	21.8798	21.8798	21.8798	21.8798	21.8798	0.421923	0.467618	0.240843	FALSE	CG2875
FBtr0070590	24.9973	24.1333	21.8798	23.9779	26.6814	27.1774	27.2075	27.5989	0.0174752	0.839089	-3.41921	FALSE	CG14270
FBtr0333764;FBtr0070600;FBtr0070598;FBtr0070597	31.7441	31.5415	31.2129	32.6298	30.9401	30.7561	31.0428	31.0148	0.125008	0.695439	0.843615	FALSE	HIP-R;HIP
FBtr0070606;FBtr0112801;FBtr0112802	21.8798	21.8798	21.8798	21.8798	21.8798	21.8798	21.8798	21.8798	0.421923	0	0	FALSE	ec
FBtr0340202;FBtr0070610;FBtr0070609;FBtr0340201	27.0076	27.9895	27.9864	26.7626	28.5121	27.5484	27.7949	27.1983	0.53875	0.2799	-0.326903	FALSE	CG2930
FBtr0070611	31.0337	31.2418	31.1138	30.0997	31.416	31.4102	31.1074	31.3763	0.34011	0.528637	-0.455223	FALSE	VhaAC39-1
FBtr0070612	21.8798	21.8798	21.8798	21.8798	21.8798	21.8798	21.8798	21.8798	0.421923	0	0	FALSE	CG15239
FBtr0345711;FBtr0070613	21.8798	21.8798	21.8798	21.8798	21.8798	21.8798	21.8798	21.8798	0.421923	0	0	FALSE	CG2941
FBtr0070617;FBtr0342739;FBtr0070618;FBtr0070616	32.1393	32.124	32.1307	32.4729	32.0694	32.0892	32.1525	32.0515	0.421923	0.471314	0.126062	FALSE	Vap-33A
FBtr0070624	21.8798	21.8798	21.8798	21.8798	21.8798	21.8798	21.8798	21.8798	0.421923	0	0	FALSE	CG6414
FBtr0070625	25.8348	23.6064	23.8945	25.8549	25.963	26.5081	26.2433	25.8835	0.213788	0.619756	-1.35183	FALSE	CG6428
FBtr0342740;FBtr0070626	27.0859	27.5186	26.6411	29.1936	28.1905	27.0907	27.2291	27.0891	0.787232	0.128604	0.20995	FALSE	lva
FBtr0070638	21.8798	21.8798	21.8798	21.8798	21.8798	21.8798	21.8798	21.8798	0.421923	0	0	FALSE	brn
FBtr0343425;FBtr0307206;FBtr0070641;FBtr0070639	31.0905	30.7902	31.3085	32.6807	29.813	29.8665	30.4196	29.6973	0.0670705	0.758161	1.51839	FALSE	cib
FBtr0333184;FBtr0333183;FBtr0070642	24.1089	21.8798	21.8798	26.1571	21.8798	21.8798	21.8798	21.8798	0.3677	0.50757	1.62663	FALSE	dgt4
FBtr0345713;FBtr0305182;FBtr0305181;FBtr0300931;FBtr0070643;FBtr0305185;FBtr0305184;FBtr0305183;FBtr0305180;FBtr0305179;FBtr0301124	27.0478	26.9209	25.5966	29.2263	21.8798	21.8798	21.8798	23.3411	0.00906709	0.864497	4.95282	TRUE	tyf
FBtr0070644	26.4416	26.4672	25.7118	26.6072	25.5194	25.492	24.3731	26.3756	0.281123	0.572423	0.866935	FALSE	GlcAT-I
FBtr0070645	28.4758	28.1128	27.4335	30.2661	21.8798	21.8798	21.8798	21.8798	0.000615674	0.91332	6.69226	TRUE	CG15570
FBtr0340200;FBtr0070648	29.934	30.3589	29.8999	30.4093	27.2393	27.4403	26.4931	26.8267	0.000329198	0.918049	3.15067	TRUE	CG2982
FBtr0301475;FBtr0070651;FBtr0070650	21.8798	21.8798	21.8798	21.8798	23.9169	23.212	24.5179	23.6329	0.00438217	0.884	-1.94015	FALSE	norpA
FBtr0070652	27.5337	27.1839	27.6808	27.0938	28.1896	28.0841	27.8701	27.6101	0.099535	0.722943	-0.565447	FALSE	CG3626
FBtr0070655	27.918	27.4626	27.7579	28.085	22.4375	27.019	26.0626	23.2281	0.11468	0.705688	3.11907	FALSE	mRpL33
FBtr0343574;FBtr0070656	23.0054	24.4309	26.0683	21.8798	21.8798	23.4585	21.8798	21.8798	0.364607	0.509331	1.57165	FALSE	mei-9
FBtr0070663	29.5467	29.5092	29.1494	30.2118	22.4541	22.1311	24.5382	23.2558	0.0005714	0.913901	6.50944	TRUE	Femcoat
FBtr0336882;FBtr0336884;FBtr0070665;FBtr0343523;FBtr0343524;FBtr0070666;FBtr0070667	29.4088	29.6441	29.8905	29.2285	29.9879	29.5319	29.7039	29.4745	0.567384	0.261822	-0.131574	FALSE	Fas2
FBtr0333185;FBtr0333186;FBtr0070668	21.8798	21.8798	21.8798	21.8798	21.8798	21.8798	21.8798	21.8798	0.421923	0	0	FALSE	Tip60
FBtr0070669	28.8254	29.1486	28.8301	26.7961	23.8507	22.6743	22.2044	24.4387	0.00501791	0.880663	5.10802	TRUE	Nsun2
FBtr0070670	21.8798	21.8798	21.8798	21.8798	21.8798	21.8798	21.8798	21.8798	0.421923	0	0	FALSE	Xpac
FBtr0343297;FBtr0070671	21.8798	21.8798	21.8798	21.8798	21.8798	21.8798	21.8798	21.8798	0.421923	0	0	FALSE	CG6379
FBtr0308916;FBtr0070674	23.4418	24.7862	21.8798	23.8449	21.8798	21.8798	21.8798	21.8798	0.133012	0.687604	1.60839	FALSE	CG3556
FBtr0343566;FBtr0070675	30.7191	30.9993	31.0464	30.3595	31.0547	31.0818	30.6938	30.8724	0.524534	0.288633	-0.144567	FALSE	CHOp24
FBtr0070677	25.8382	25.5676	25.5614	25.7881	26.0578	25.6483	26.3033	26.9589	0.265865	0.582326	-0.553208	FALSE	CG15912
FBtr0070678	22.749	23.1677	23.2973	23.7504	21.8798	21.8798	21.8798	21.8798	0.00586475	0.877008	1.36132	FALSE	CG3527
FBtr0070679	21.8798	21.8798	21.8798	21.8798	23.199	21.8798	24.2417	21.8798	0.358589	0.513303	-0.9203	FALSE	CG3546
FBtr0070681	21.8798	21.8798	21.8798	21.8798	21.8798	21.8798	21.8798	21.8798	0.421923	0	0	FALSE	pon
FBtr0070682	27.9316	27.8871	27.6907	28.6772	22.0996	23.461	27.512	27.0526	0.200302	0.63033	3.01535	FALSE	mRpL30
FBtr0070684;FBtr0070683	27.993	28.4895	28.3661	27.999	25.4082	27.5087	21.8798	22.7956	0.100491	0.72155	3.81382	FALSE	Cbp80
FBtr0070687;FBtr0070686	21.8798	21.8798	21.8798	21.8798	21.8798	21.8798	21.8798	21.8798	0.421923	0	0	FALSE	rap
FBtr0345715;FBtr0070690	29.2602	29.4112	28.2894	29.9066	28.8499	27.1499	28.794	28.5278	0.336203	0.531688	0.886459	FALSE	Torsin
FBtr0343567;FBtr0070698	22.3427	22.3076	23.3147	28.2951	26.5641	21.8798	21.8798	21.8798	0.660297	0.204533	1.01417	FALSE	CG11444
FBtr0070699	21.8798	21.8798	21.8798	21.8798	21.8798	21.8798	21.8798	21.8798	0.421923	0	0	FALSE	CG11436
FBtr0343568;FBtr0332290;FBtr0070702	22.7827	26.1574	26.9051	21.8798	23.3553	23.7745	24.5248	21.8798	0.535964	0.281491	1.04763	FALSE	rb
FBtr0307065;FBtr0070707;FBtr0070706;FBtr0070704	28.6178	28.8421	29.6466	28.7976	29.9524	29.1638	29.36	29.3349	0.342926	0.525954	-0.476771	FALSE	ctp
FBtr0070709;FBtr0070708;FBtr0070711;FBtr0070710	34.4718	34.8529	34.9266	34.3741	34.7017	34.7449	34.6625	34.6602	0.838966	0.0985703	-0.0359456	FALSE	l(1)G0334
FBtr0070712	21.8798	21.8798	21.8798	21.8798	28.0468	28.1431	27.2947	27.4494	6.08098e-06	0.931756	-5.85371	TRUE	CG7024
FBtr0070721	21.8798	21.8798	21.8798	21.8798	21.8798	21.8798	21.8798	21.8798	0.421923	0	0	FALSE	CG6927
FBtr0343535;FBtr0070723	21.8798	21.8798	21.8798	21.8798	21.8798	21.8798	21.8798	21.8798	0.421923	0	0	FALSE	CG6903
FBtr0070725;FBtr0343528;FBtr0343529;FBtr0301796;FBtr0301794;FBtr0301793;FBtr0070724	21.8798	21.8798	21.8798	21.8798	21.8798	21.8798	21.8798	21.8798	0.421923	0	0	FALSE	Ptp4E
FBtr0070748	28.9658	28.0544	28.2722	29.3695	25.8656	27.5385	27.5763	27.5841	0.104616	0.71601	1.52436	FALSE	snf
FBtr0345745;FBtr0070749	33.8192	33.296	32.8283	33.9706	21.8798	21.8798	21.8798	24.0014	4.43553e-05	0.927517	11.0683	TRUE	dhd
FBtr0070751	24.7334	24.2795	21.8798	25.2508	21.8798	21.8798	21.8798	21.8798	0.106545	0.71377	2.1561	FALSE	Sas10
FBtr0340477;FBtr0112876;FBtr0070753;FBtr0070752	27.9712	28.2983	27.9436	27.2359	23.7685	23.8282	24.3716	23.7486	0.000151897	0.9226	3.93302	TRUE	Rnp4F
FBtr0340478;FBtr0070755	21.8798	21.8798	21.8798	21.8798	28.3823	28.1969	28.0271	28.4121	7.5204e-08	0.934861	-6.37483	TRUE	TrxT
FBtr0070756	23.8494	23.3317	23.8688	24.5727	21.8798	23.6855	21.8798	21.8798	0.0942181	0.728142	1.57445	FALSE	Cdk7
FBtr0340476;FBtr0070762	29.5065	29.5347	29.6744	30.0346	21.8798	21.8798	21.8798	21.8798	1.14265e-07	0.934737	7.80779	TRUE	Mcm3
FBtr0070763	21.8798	21.8798	21.8798	21.8798	24.0071	21.8798	21.8798	21.8798	0.421923	0.353553	-0.531821	FALSE	XRCC1
FBtr0308348;FBtr0070764	21.5744	24.7164	24.0913	23.9093	21.8798	21.8798	24.4385	23.4413	0.568877	0.260879	0.663041	FALSE	CanB
FBtr0340462;FBtr0340461;FBtr0070775;FBtr0070773;FBtr0070772	26.8272	23.4667	25.7843	27.7478	21.8798	21.8798	21.8798	21.8798	0.0267535	0.818294	4.07673	FALSE	CG4165
FBtr0070776	27.3274	21.7802	27.1649	27.1867	21.8798	24.062	21.6903	24.1672	0.274499	0.576735	2.91499	FALSE	CG16756
FBtr0340460;FBtr0070777	27.37	26.8009	27.5921	26.3394	28.4873	27.116	26.9283	25.784	0.947647	0.0326846	-0.0532829	FALSE	CG15784
FBtr0345786;FBtr0070779	21.8798	21.8798	21.8798	21.8798	21.8798	21.8798	21.8798	21.8798	0.421923	0	0	FALSE	CG4151
FBtr0070782	21.8798	21.8798	21.8798	21.8798	21.8798	21.8798	21.8798	21.8798	0.421923	0	0	FALSE	l(1)G0045
FBtr0070784;FBtr0070785	21.8798	21.8798	21.8798	21.8798	21.8798	21.8798	21.8798	21.8798	0.421923	0	0	FALSE	RhoGAP5A
FBtr0345787;FBtr0070791	21.8798	21.8798	21.8798	21.8798	21.8798	21.8798	21.8798	21.8798	0.421923	0	0	FALSE	CG32762
FBtr0308689;FBtr0308688;FBtr0070794;FBtr0070795	26.6879	25.6717	22.1921	27.0041	21.8798	21.8798	21.8798	21.8798	0.0819712	0.741215	3.50917	FALSE	spoon
FBtr0070797	23.6826	23.4342	24.5069	21.8798	23.7321	25.9145	23.632	21.8798	0.739764	0.157027	-0.413726	FALSE	NAAT1
FBtr0344827;FBtr0070798	21.8798	21.8798	21.8798	21.8798	21.8798	21.8798	21.8798	21.8798	0.421923	0	0	FALSE	CG3309
FBtr0340463;FBtr0070799	24.9888	21.8798	24.0203	23.4846	21.8798	21.8798	21.8798	21.8798	0.13557	0.685028	1.71361	FALSE	CG4119
FBtr0345788;FBtr0070801;FBtr0070800	32.3378	31.9827	32.1226	32.2029	31.2247	31.3092	30.7679	30.7749	0.00447071	0.883544	1.14235	FALSE	RpL35
FBtr0340465;FBtr0340464;FBtr0070804	21.8798	21.8798	21.8798	21.8798	21.8798	21.8798	21.8798	21.8798	0.421923	0	0	FALSE	cv
FBtr0332398;FBtr0070807	21.8798	24.8554	21.8798	21.8798	22.5199	21.8798	21.8798	21.8798	0.5391	0.279634	0.583895	FALSE	CG4078
FBtr0339743;FBtr0070808	21.8798	21.8798	21.8798	21.8798	23.9684	21.8798	22.4873	23.8273	0.193633	0.636103	-1.16092	FALSE	CG15772
FBtr0070815	21.8798	21.8798	21.8798	21.8798	21.8798	21.8798	21.8798	21.8798	0.421923	0	0	FALSE	Cpr5C
FBtr0345313;FBtr0339948;FBtr0070821	26.6901	27.4028	27.115	27.0928	26.1291	26.5037	26.1577	26.3597	0.0232201	0.825753	0.787595	FALSE	CG16721
FBtr0345894;FBtr0100663;FBtr0100662;FBtr0070823;FBtr0070822	28.8006	30.3485	29.0857	28.6058	29.6632	24.3932	28.3961	28.6812	0.421923	0.401265	1.42672	FALSE	Act5C
FBtr0333800;FBtr0070824	28.9876	29.149	29.1563	28.0633	27.123	27.6242	28.0254	28.2134	0.0913361	0.731167	1.09256	FALSE	CG4020
FBtr0345317;FBtr0290235;FBtr0070827	33.5427	33.1853	33.3481	33.6121	33.6846	33.7196	33.9176	34.1841	0.094996	0.727384	-0.454399	FALSE	CG3011
FBtr0343537;FBtr0070828	25.1524	25.9983	26.1216	21.8798	26.3961	26.1442	25.0568	23.3719	0.765168	0.141928	-0.454221	FALSE	CG3016
FBtr0070829	21.8798	21.8798	21.8798	21.8798	21.8798	21.8798	21.8798	21.8798	0.421923	0	0	FALSE	mof
FBtr0070830	27.1083	27.3908	27.5169	26.1394	24.6087	25.4491	22.3736	21.8798	0.0471041	0.784964	3.46105	FALSE	GAA1
FBtr0070832	24.1681	21.8798	24.2365	24.2905	21.8798	21.8798	21.8798	21.8798	0.0982485	0.724306	1.76396	FALSE	CG15766
FBtr0070833	25.6869	25.0486	24.2038	21.8798	21.8798	21.8798	21.8798	21.8798	0.117122	0.703289	2.32502	FALSE	CG3108
FBtr0070836	23.7581	21.8798	24.7836	21.8798	26.5093	26.7233	26.2888	25.552	0.0332838	0.806768	-3.19305	FALSE	CG3097
FBtr0308577;FBtr0302940;FBtr0070839;FBtr0070837	27.3212	26.7657	27.2415	27.075	28.1723	27.6616	27.8791	27.0568	0.202921	0.628321	-0.59159	FALSE	MAPk-Ak2
FBtr0339744;FBtr0070840	21.8798	21.8798	21.8798	21.8798	21.8798	21.8798	21.8798	21.8798	0.421923	0	0	FALSE	lin-52
FBtr0332401;FBtr0332400;FBtr0332399;FBtr0070842;FBtr0070841	21.8798	21.8798	21.8798	21.8798	21.8798	21.8798	21.8798	21.8798	0.421923	0	0	FALSE	IntS6
FBtr0070843;FBtr0340670;FBtr0339525	21.8798	21.8798	24.5736	21.8798	23.555	21.8798	21.8798	21.8798	0.79914	0.121573	0.254631	FALSE	CG32758
FBtr0342972;FBtr0070845;FBtr0342971;FBtr0070844	21.8798	21.8798	21.8798	21.8798	21.8798	21.8798	21.8798	21.8798	0.421923	0	0	FALSE	CG33080
FBtr0070847	21.8798	21.8798	24.7048	21.8798	23.2961	23.5898	24.5965	23.9596	0.34011	0.528479	-1.27445	FALSE	CG3160
FBtr0308339;FBtr0070848;FBtr0340222	21.8798	21.8798	21.8798	21.8798	21.8798	21.8798	21.8798	21.8798	0.421923	0	0	FALSE	Tre1
FBtr0070849	28.103	27.7902	27.7819	28.2957	27.5554	27.5505	27.4466	28.0362	0.28106	0.572499	0.345556	FALSE	Rab18
FBtr0070852;FBtr0070851;FBtr0070850	22.8437	23.4496	21.8798	22.543	26.44	25.8539	25.9218	23.5151	0.0473375	0.784671	-2.75367	FALSE	Sirt4
FBtr0070864	22.8584	26.8728	24.7196	21.8798	24.1079	25.3146	21.8798	22.4972	0.707431	0.175987	0.632796	FALSE	CG6067
FBtr0070866;FBtr0343294	21.8798	21.8798	21.8798	21.8798	21.8798	21.8798	21.8798	21.8798	0.421923	0	0	FALSE	CG5966
FBtr0305344;FBtr0070867	30.4182	29.8721	29.9843	29.9985	28.6404	29.2576	29.0066	28.7548	0.00696555	0.872195	1.1534	FALSE	CG5941
FBtr0070871;FBtr0308190	21.8798	21.8798	21.8798	21.8798	26.4818	27.0999	23.9904	22.8758	0.0789405	0.744535	-3.23219	FALSE	CG5928
FBtr0343930;FBtr0340032;FBtr0070873;FBtr0070872	21.8798	21.8798	21.8798	21.8798	23.3067	21.8798	21.8798	21.8798	0.421923	0.353553	-0.356721	FALSE	Nep1
FBtr0345294;FBtr0339504;FBtr0339503;FBtr0339502;FBtr0070877	29.106	29.3804	28.7984	30.2918	27.6973	28.4105	27.7831	28.0667	0.041879	0.792265	1.40474	FALSE	sqh
FBtr0070878	21.8798	21.8798	21.8798	21.8798	21.8798	21.8798	21.8798	21.8798	0.421923	0	0	FALSE	Btd
FBtr0070879	25.9095	26.268	26.1671	24.1306	21.8798	21.8798	21.8798	21.8798	0.00356837	0.888633	3.73901	TRUE	vanin-like
FBtr0070881	21.8798	21.8798	21.8798	21.8798	21.8798	21.8798	21.8798	21.8798	0.421923	0	0	FALSE	CG32750
FBtr0070884	26.1549	23.8019	24.8716	21.8798	23.4812	21.8798	21.8798	21.8798	0.274499	0.576713	1.8969	FALSE	Mipp2
FBtr0345900;FBtr0070887	27.7735	27.8531	27.8113	26.9858	29.7918	29.8852	29.3178	30.1458	0.00254679	0.895119	-2.17927	TRUE	CG4666
FBtr0114466;FBtr0070888;FBtr0331169	27.1914	24.0842	27.5043	26.5549	28.0755	27.6807	27.623	23.3957	0.834171	0.101313	-0.360016	FALSE	Tsp5D
FBtr0070890	21.8798	21.8798	21.8798	21.8798	21.8798	21.8798	21.8798	21.8798	0.421923	0	0	FALSE	mab-21
FBtr0070892	27.1659	27.376	25.9262	28.4281	24.6294	21.8798	21.8798	21.8798	0.0126778	0.852632	4.65687	FALSE	fs(1)M3
FBtr0070893;FBtr0339496;FBtr0112954;FBtr0339495	28.0371	27.801	26.9522	26.9842	28.5981	28.4067	28.606	28.6888	0.0395215	0.79599	-1.13129	FALSE	CG14445
FBtr0070894	21.8798	21.8798	21.8798	21.8798	21.8798	21.8798	21.8798	21.8798	0.421923	0	0	FALSE	Spx
FBtr0070895	21.8798	21.8798	24.2046	23.5247	21.8798	21.8798	23.7194	24.3611	0.938195	0.0385882	-0.0877999	FALSE	CG3781
FBtr0340027;FBtr0070896	26.3701	26.5153	26.0728	25.9782	21.8798	24.1941	23.5167	23.5976	0.0102632	0.860369	2.93706	FALSE	Spt6
FBtr0070897	28.9084	29.1489	29.0215	28.6648	28.9144	29.1372	29.0354	29.3443	0.421923	0.42569	-0.171953	FALSE	wuho
FBtr0305494;FBtr0070898	22.3098	23.6127	21.8798	22.3097	21.8798	21.8798	21.8798	21.8798	0.331486	0.538842	0.648203	FALSE	CG15896
FBtr0070899	21.8798	21.8798	21.8798	24.7525	21.8798	21.8798	21.8798	21.8798	0.421923	0.353553	0.718191	FALSE	CG3815
FBtr0070900	21.8798	21.8798	21.8798	21.8798	21.8798	21.8798	21.8798	21.8798	0.421923	0	0	FALSE	CG3823
FBtr0331395;FBtr0331394;FBtr0070904;FBtr0070903	28.1886	28.5738	27.9931	27.4091	28.1091	28.6465	28.4067	28.6779	0.393267	0.49241	-0.418888	FALSE	CG3842
FBtr0070905	25.7658	25.2737	24.5324	21.5537	21.8798	21.8798	21.8798	21.8798	0.147038	0.673881	2.40164	FALSE	CG3847
FBtr0070907;FBtr0070906	36.5451	36.7258	36.7644	36.7854	36.8803	36.7513	36.8744	37.0445	0.198874	0.631804	-0.182475	FALSE	kdn
FBtr0070910;FBtr0070909;FBtr0343373	28.1311	28.4529	28.8795	27.0204	28.6144	29.0872	28.3758	28.3123	0.421923	0.382066	-0.476456	FALSE	Marf
FBtr0070913	30.4921	30.7216	30.7074	29.7796	30.8367	30.812	30.8077	31.0113	0.265962	0.582233	-0.441745	FALSE	Spat
FBtr0070914	21.8798	21.8798	21.8798	21.8798	21.8798	21.8798	21.8798	21.8798	0.421923	0	0	FALSE	dx
FBtr0345293;FBtr0343329;FBtr0343328;FBtr0070916;FBtr0070915	34.051	33.8815	33.9611	34.1388	33.0963	33.1099	33.0265	32.795	0.000666036	0.912693	1.0012	FALSE	RpL7A
FBtr0070918	21.8798	21.8798	21.8798	21.8798	21.8798	21.8798	21.8798	21.8798	0.421923	0	0	FALSE	CG3342
FBtr0331432;FBtr0331431;FBtr0331430;FBtr0070921	27.9212	28.01	27.0779	27.38	27.1295	26.0592	25.9339	27.0604	0.126793	0.693743	1.05152	FALSE	PpV
FBtr0070922	24.0392	21.8798	21.8798	27.2606	21.8798	21.8798	21.8798	21.8798	0.406055	0.484335	1.88507	FALSE	swa
FBtr0347282;FBtr0340026;FBtr0070924	33.1071	33.1534	33.4944	32.5143	33.339	33.4993	33.6189	33.6366	0.222881	0.612712	-0.456127	FALSE	CG3446
FBtr0070926	21.8798	21.8798	21.8798	21.8798	26.5948	26.914	26.3699	23.9166	0.00906709	0.864495	-4.06905	TRUE	CG15892
FBtr0340028;FBtr0070930	26.5173	25.5335	25.615	26.2709	22.6813	21.8798	24.2197	25.1475	0.0788196	0.744738	2.50208	FALSE	Top3beta
FBtr0070938;FBtr0070937	21.8798	26.8504	27.1979	26.9751	23.1471	23.7529	27.0187	27.581	0.872764	0.0782411	0.35087	FALSE	schlank
FBtr0070946;FBtr0070947	21.8798	21.8798	21.8798	21.8798	21.8798	21.8798	21.8798	21.8798	0.421923	0	0	FALSE	APC7
FBtr0070952	29.1109	28.7813	28.2845	28.6658	21.8798	21.8798	21.8798	21.8798	9.58663e-07	0.933671	6.83086	TRUE	Mcm6
FBtr0070954;FBtr0070953	34.6421	34.5024	34.4356	34.9524	34.3643	34.5621	34.8265	34.7219	0.941854	0.0360347	0.0144203	FALSE	l(1)G0255
FBtr0070955	21.8798	21.8798	21.8798	21.8798	29.7778	29.8439	29.9191	29.6617	7.92826e-09	0.935281	-7.92086	TRUE	CG4095
FBtr0345295;FBtr0100420;FBtr0100419;FBtr0100416;FBtr0100415;FBtr0100414;FBtr0100413;FBtr0070957;FBtr0070956	21.8798	21.8798	21.8798	21.8798	21.8798	21.8798	21.8798	21.8798	0.421923	0	0	FALSE	Pink1
FBtr0302357;FBtr0302356;FBtr0070960	21.8798	21.8798	21.8798	21.8798	23.3612	23.3554	23.885	23.9497	0.000678201	0.912482	-1.75803	FALSE	CG14439
FBtr0339464;FBtr0070962;FBtr0070961	28.2371	28.5499	22.3839	27.7949	23.4408	23.562	24.1956	23.4739	0.230647	0.606917	3.07336	FALSE	CG14438
FBtr0070963	28.3029	27.5007	28.4679	28.2977	27.9297	28.3094	27.9237	28.1874	0.857979	0.0875826	0.0547769	FALSE	COQ7
FBtr0070970	21.8798	21.8798	21.8798	21.8798	21.8798	21.8798	21.8798	21.8798	0.421923	0	0	FALSE	xit
FBtr0343321;FBtr0070972	21.8798	21.8798	23.9116	21.8798	21.8798	21.8798	21.8798	21.8798	0.421923	0.353553	0.507948	FALSE	nonC
FBtr0340089;FBtr0340090;FBtr0070978;FBtr0340088	21.8798	21.8798	21.8798	21.8798	21.8798	21.8798	21.8798	21.8798	0.421923	0	0	FALSE	shf
FBtr0345292;FBtr0070983;FBtr0070982;FBtr0070981;FBtr0070980	33.286	32.9538	32.9624	33.558	32.3534	32.2584	32.2015	32.1452	0.00718494	0.871243	0.950373	FALSE	RpL17
FBtr0340268;FBtr0340267;FBtr0340266;FBtr0340265;FBtr0070986;FBtr0070985;FBtr0070984	23.6236	24.0535	24.3644	21.8798	23.4599	24.5249	23.4689	24.4869	0.521499	0.290447	-0.504859	FALSE	CG3168
FBtr0300772;FBtr0339493;FBtr0339491;FBtr0070988	21.8798	21.8798	21.8798	21.8798	21.8798	21.8798	21.8798	21.8798	0.421923	0	0	FALSE	CG14442
FBtr0070989	22.3095	23.6766	23.3302	23.8924	21.8798	21.8798	21.8798	21.8798	0.036634	0.800793	1.42237	FALSE	CG3184
FBtr0343330;FBtr0100409;FBtr0070990	32.5915	32.6395	32.872	32.3429	32.9664	32.9359	32.6945	32.7413	0.331486	0.541789	-0.223058	FALSE	CG3192
FBtr0070991	23.7273	24.0169	24.0271	23.774	23.8834	24.5938	21.8798	21.8798	0.421923	0.406103	0.82713	FALSE	CG3198
FBtr0070992	21.8798	21.8798	21.8798	21.8798	21.8798	21.8798	21.8798	21.8798	0.421923	0	0	FALSE	CG3224
FBtr0070993	30.6562	30.7723	30.4936	31.0877	27.5922	28.9783	27.9835	28.7908	0.00493143	0.881032	2.41625	TRUE	CG3226
FBtr0071003	28.5818	28.7667	28.437	28.9697	21.8798	21.8798	21.8798	21.8798	1.58329e-07	0.934609	6.80902	TRUE	CG4586
FBtr0071004	23.3331	24.4022	26.6057	24.3689	22.7815	26.5163	21.9793	23.041	0.469807	0.323015	1.09796	FALSE	bou
FBtr0332314;FBtr0301860;FBtr0071006;FBtr0071005	29.2926	29.7896	29.5981	28.3546	29.6787	30.1377	29.5147	30.3296	0.320877	0.547603	-0.656485	FALSE	Inx2
FBtr0071008;FBtr0071007	24.943	23.5979	24.2522	24.1114	21.8798	22.1466	21.8798	21.8798	0.00266409	0.894371	2.27962	TRUE	CG32736
FBtr0343331;FBtr0071009	29.7793	29.047	29.0699	30.1431	25.8271	26.9264	26.0368	26.387	0.00169921	0.901723	3.21548	TRUE	CG4593
FBtr0071015	23.6851	21.8798	25.0008	21.8798	21.8798	21.8798	21.8798	21.8798	0.355194	0.516076	1.23158	FALSE	CG8300
FBtr0332315;FBtr0071033	22.9924	23.2021	24.1759	22.9723	21.8798	24.6349	26.0037	25.2902	0.421923	0.40611	-1.11648	FALSE	cm
FBtr0071035;FBtr0071034	21.8798	21.8798	24.0885	21.8798	23.3568	24.2845	24.3943	24.1403	0.129137	0.691207	-1.61201	FALSE	Inx7
FBtr0334881;FBtr0309875;FBtr0309874;FBtr0309873;FBtr0071037;FBtr0071036	26.8968	27.7473	27.919	26.3139	28.3146	27.5155	28.5222	28.1556	0.229728	0.607566	-0.907716	FALSE	ogre
FBtr0071038	28.2272	28.5508	28.1417	28.8018	27.324	28.2052	27.5356	27.9813	0.133934	0.686869	0.668882	FALSE	CG3040
FBtr0071039	25.9113	23.7127	26.0996	25.372	21.8798	21.8798	21.8798	21.8798	0.00724243	0.870979	3.39412	TRUE	CG32732
FBtr0343322;FBtr0071040;FBtr0345899	29.6269	29.5695	29.2418	30.2835	23.9281	23.3372	25.1347	25.6911	0.00170911	0.901565	5.15764	TRUE	CG14434
FBtr0071041	21.8798	21.8798	21.8798	21.8798	21.8798	21.8798	21.8798	21.8798	0.421923	0	0	FALSE	Cht11
FBtr0343323;FBtr0071042	21.8798	21.8798	21.8798	21.8798	21.8798	21.8798	21.8798	21.8798	0.421923	0	0	FALSE	CG14435
FBtr0303414;FBtr0071047	28.7165	28.3572	28.0979	28.9365	28.8742	28.3438	29.4601	29.2762	0.402922	0.486306	-0.461569	FALSE	CG2059
FBtr0071051	21.8798	21.8798	21.8798	21.8798	21.8798	21.8798	21.8798	21.8798	0.421923	0	0	FALSE	CG18155
FBtr0071053;FBtr0071052;FBtr0329894	29.5371	29.4259	29.2893	30.8713	21.8798	21.8798	21.8798	21.8798	2.12655e-05	0.929419	7.90113	TRUE	CBP
FBtr0071055	21.8798	21.8798	21.8798	21.8798	23.6003	23.7346	24.6243	25.0079	0.0048149	0.881664	-2.36201	TRUE	CheA7a
FBtr0339816;FBtr0071064	21.8798	21.8798	21.8798	21.8798	24.1862	23.664	21.8798	21.8798	0.333404	0.534289	-1.02266	FALSE	CG15034
FBtr0071065	25.0122	25.3891	24.1635	24.0968	22.3747	23.2827	23.5682	25.5956	0.421923	0.432991	0.960077	FALSE	Atg5
FBtr0346619;FBtr0071066	21.8798	21.8798	21.8798	21.8798	21.8798	21.8798	21.8798	21.8798	0.421923	0	0	FALSE	unc-119
FBtr0305134;FBtr0331733;FBtr0071068;FBtr0114613	21.8798	21.8798	21.8798	21.8798	21.8798	21.8798	21.8798	21.8798	0.421923	0	0	FALSE	ct
FBtr0071070	24.1209	23.5543	23.8139	24.5294	21.8798	21.8798	21.8798	21.8798	0.000957733	0.909206	2.12484	TRUE	Hira
FBtr0307272;FBtr0071072	28.1729	27.7024	28.1969	27.3042	27.4377	27.9649	28.5918	28.3957	0.542458	0.27754	-0.253402	FALSE	Rab39
FBtr0333748;FBtr0071074;FBtr0071073	30.3905	30.5054	30.9378	29.83	30.7045	30.6103	30.7157	30.5124	0.448966	0.336234	-0.219818	FALSE	Tom40
FBtr0307273;FBtr0071076	28.482	28.5681	28.7466	27.9915	28.3567	28.648	28.6111	28.3027	0.8908	0.0675669	-0.0325977	FALSE	Pdp
FBtr0071077	23.8261	26.2205	22.382	21.8798	21.8798	21.8798	21.8798	21.8798	0.330099	0.542656	1.6973	FALSE	NELF-B
FBtr0310287;FBtr0333203;FBtr0112946;FBtr0071079	21.8798	21.8798	21.8798	21.8798	21.8798	21.8798	21.8798	21.8798	0.421923	0	0	FALSE	CHES-1-like
FBtr0340162;FBtr0071089	27.0294	27.508	26.8696	26.5093	25.9292	27.2828	26.6505	26.8185	0.477846	0.317839	0.308857	FALSE	p115
FBtr0071090	27.5419	27.9614	27.3068	26.2383	23.8972	25.3349	24.9929	25.9918	0.0435831	0.790054	2.2079	FALSE	bys
FBtr0071091	31.0591	31.3505	31.318	30.0931	31.7696	32.2382	31.5876	32.3404	0.100163	0.721967	-1.02879	FALSE	CG1444
FBtr0340148;FBtr0071092	21.8798	21.8798	21.8798	21.8798	21.8798	21.8798	23.9121	23.1414	0.348013	0.521367	-0.823476	FALSE	snz
FBtr0071093	28.6069	28.6646	28.5475	28.1804	28.685	28.8942	28.6828	29.1394	0.191878	0.637208	-0.350487	FALSE	Ykt6
FBtr0345291;FBtr0071096;FBtr0071095;FBtr0071094	33.503	33.4917	33.3757	33.2893	32.806	32.6433	32.2493	32.291	0.00690616	0.87248	0.917515	FALSE	RpS14b;RpS14a
FBtr0301679;FBtr0301677;FBtr0071102;FBtr0071101	28.5035	28.6559	27.2617	29.2492	26.2597	24.9945	27.3289	27.8757	0.174857	0.650464	1.80287	FALSE	sn
FBtr0340137;FBtr0340136;FBtr0071105;FBtr0340135	30.1536	30.5537	30.2937	30.4097	30.434	30.224	30.5576	30.3542	0.774604	0.136263	-0.0397261	FALSE	mys
FBtr0340139;FBtr0340138;FBtr0071108;FBtr0071107	28.9411	29.2138	29.0107	28.2402	28.306	29.0511	29.0635	29.433	0.779689	0.133326	-0.111949	FALSE	Gclc
FBtr0340140;FBtr0071111;FBtr0071110;FBtr0071109	28.07	27.7681	28.0971	27.1265	28.4393	28.4263	27.7991	27.9272	0.421923	0.455106	-0.38254	FALSE	CG2258
FBtr0071114;FBtr0071113;FBtr0071112	29.2156	29.5866	29.043	28.7441	28.5002	28.0886	23.2903	27.777	0.304861	0.557153	2.23329	FALSE	UbcE2H
FBtr0071116	30.9203	30.7988	30.8599	29.8182	32.2361	32.1982	31.6597	32.1932	0.0173255	0.839437	-1.47253	FALSE	CG2254
FBtr0071117	25.067	24.4952	25.5099	21.8798	21.8798	24.1179	21.8798	24.2802	0.421923	0.39396	1.19856	FALSE	Upf2
FBtr0071119;FBtr0333307;FBtr0333308;FBtr0301309;FBtr0071122;FBtr0071121;FBtr0071120;FBtr0071118;FBtr0333309	21.8798	21.8798	23.3343	21.8798	24.9765	21.8798	21.8798	21.8798	0.701095	0.17988	-0.410557	FALSE	fs(1)h
FBtr0071123	31.1627	31.0813	31.7366	29.9844	31.0305	30.2632	31.3198	31.0881	0.906309	0.0581492	0.0658931	FALSE	CG2233
FBtr0071125;FBtr0301675	21.8798	25.6644	25.1086	21.8798	26.1308	26.0686	24.7613	25.3427	0.304722	0.557264	-1.94272	FALSE	sws
FBtr0071129	21.8798	21.8798	21.8798	21.8798	21.8798	21.8798	21.8798	21.8798	0.421923	0	0	FALSE	l(1)G0193
FBtr0071130	21.8798	21.8798	21.8798	21.8798	22.9862	21.8798	21.8798	21.8798	0.421923	0.353553	-0.276605	FALSE	l(1)G0193
FBtr0331433;FBtr0071131	21.8798	21.8798	21.8798	21.8798	21.8798	21.8798	21.8798	21.8798	0.421923	0	0	FALSE	CG10778
FBtr0344137;FBtr0071132	29.9368	30.1522	29.9784	30.1127	29.2085	29.3821	29.0319	29.113	0.0013196	0.905325	0.861145	FALSE	CG10777
FBtr0071135;FBtr0071136	33.1845	33.0271	32.9953	33.3387	32.565	32.5059	32.3613	32.1126	0.00948781	0.862983	0.75023	FALSE	RpS6
FBtr0340163;FBtr0300900;FBtr0300899;FBtr0071141;FBtr0071140	31.6966	31.031	31.7239	31.8798	31.3877	31.6013	31.5301	31.8501	0.972405	0.017065	-0.00946116	FALSE	CG18624
FBtr0345982;FBtr0071143	31.9002	31.9132	31.851	31.6275	32.0882	32.0657	32.1099	32.0998	0.0389494	0.796986	-0.267898	FALSE	CG10932
FBtr0071146;FBtr0309795;FBtr0071145;FBtr0071147;FBtr0309796;FBtr0310269	32.6535	31.4735	33.3979	34.7635	21.8798	21.8798	21.8798	21.8798	9.0923e-05	0.924956	11.1923	TRUE	dec-1
FBtr0071150	21.8798	21.8798	21.8798	21.8798	21.8798	21.8798	21.8798	21.8798	0.421923	0	0	FALSE	CG10920
FBtr0339695;FBtr0071151	26.6917	26.1687	23.9656	26.3717	21.8798	21.8798	21.8798	21.8798	0.00698558	0.872108	3.91962	TRUE	CG1575
FBtr0071166	21.8798	21.8798	21.8798	23.7008	23.817	22.7225	21.8798	21.8798	0.768855	0.139965	-0.239711	FALSE	CG2147
FBtr0071167;FBtr0071169;FBtr0071168	33.8464	34.0895	33.9532	33.3092	33.5111	33.762	33.6342	33.701	0.508831	0.298091	0.147509	FALSE	Trxr-1
FBtr0307282;FBtr0071170	23.8291	24.1917	22.646	21.8798	21.8798	21.8798	21.8798	21.8798	0.17714	0.648548	1.25687	FALSE	CG1632
FBtr0343353;FBtr0071174	21.8798	21.8798	21.8798	21.8798	21.8798	21.8798	21.8798	21.8798	0.421923	0	0	FALSE	CG10555
FBtr0071175	26.1011	26.1979	24.3826	25.9402	24.7794	25.6913	21.8798	21.8798	0.265072	0.582853	2.09791	FALSE	CG11190
FBtr0071178	27.5813	27.4941	27.0092	27.805	27.2744	27.3461	27.9672	27.9591	0.602358	0.23995	-0.164282	FALSE	CG15343
FBtr0071181;FBtr0071180	34.6462	34.9664	34.7608	34.4123	34.822	34.8199	34.9135	34.8741	0.421923	0.455841	-0.160957	FALSE	ND75
FBtr0344985;FBtr0071183	29.6727	29.5421	29.4577	30.2079	29.1248	29.002	29.5074	29.3114	0.169473	0.654723	0.483708	FALSE	sni
FBtr0303844;FBtr0303843;FBtr0071184;FBtr0303842	21.8798	21.8798	21.8798	21.8798	21.8798	21.8798	21.8798	21.8798	0.421923	0	0	FALSE	slpr
FBtr0071189	26.3973	25.572	25.7553	24.6843	26.381	25.719	23.8588	25.0491	0.662897	0.202806	0.350239	FALSE	Gbeta5
FBtr0071190	30.938	30.7979	30.5515	31.1323	30.1688	30.1467	29.9877	30.0669	0.00915736	0.864175	0.762435	FALSE	CG2263
FBtr0345988;FBtr0071191	21.8798	21.8798	21.8798	21.8798	21.8798	21.8798	21.8798	21.8798	0.421923	0	0	FALSE	CG17982
FBtr0340159;FBtr0071192	21.8798	21.8798	21.8798	21.8798	21.8798	21.8798	21.8798	21.8798	0.421923	0	0	FALSE	Smox
FBtr0071194	25.388	23.1608	21.8798	23.3485	21.8798	21.8798	21.8798	21.8798	0.215914	0.618132	1.56449	FALSE	CG2260
FBtr0071197;FBtr0112962;FBtr0339438;FBtr0112961	31.2341	31.5631	31.5549	31.0478	31.651	31.7892	31.7246	31.8593	0.0952261	0.727129	-0.406055	FALSE	CG1440
FBtr0071198	21.8798	21.8798	21.8798	21.8798	21.8798	21.8798	21.8798	21.8798	0.421923	0	0	FALSE	Es2
FBtr0071201	29.0477	27.6709	27.8485	30.7812	21.8798	21.8798	21.8798	21.8798	0.00116659	0.906996	6.95727	TRUE	Cp7Fb
FBtr0071202	25.2209	23.0056	22.9798	26.9447	21.8798	21.8798	21.8798	21.8798	0.119522	0.700934	2.65797	FALSE	Cp7Fc
FBtr0071203	33.8118	33.3833	33.6376	34.8109	21.8798	21.8798	21.8798	26.9317	0.0022704	0.896954	10.7682	TRUE	Cp36
FBtr0300448;FBtr0071204	33.7027	33.5279	33.5752	34.9924	21.8798	21.8798	21.8798	25.4637	0.000485565	0.915292	11.1738	TRUE	Cp38
FBtr0333522;FBtr0301764;FBtr0301762;FBtr0071209;FBtr0071207;FBtr0333523;FBtr0301763;FBtr0071208;FBtr0305914	31.8757	32.2584	32.269	31.9661	32.2274	31.7807	31.7512	31.7682	0.421923	0.457674	0.210394	FALSE	Nrg
FBtr0112964;FBtr0112963;FBtr0331725;FBtr0331724;FBtr0331723;FBtr0071213;FBtr0071212	21.8798	21.8798	21.8798	21.8798	21.8798	21.8798	21.8798	21.8798	0.421923	0	0	FALSE	Trf4-1
FBtr0071215;FBtr0071214	21.8798	21.8798	21.8798	21.8798	21.8798	21.8798	21.8798	21.8798	0.421923	0	0	FALSE	CG12065
FBtr0332626;FBtr0071218	21.8798	21.8798	21.8798	21.8798	21.8798	21.8798	21.8798	21.8798	0.421923	0	0	FALSE	CG12081
FBtr0343356;FBtr0071219;FBtr0071220	27.2691	27.0903	27.2986	27.2938	27.069	27.1978	27.3729	26.9319	0.472797	0.32099	0.0950686	FALSE	Crag
FBtr0345984;FBtr0331731;FBtr0331730;FBtr0331729;FBtr0071222	27.1867	27.5036	27.1821	27.7824	23.078	26.0927	25.2406	25.9933	0.0780375	0.745555	2.31251	FALSE	CG11284
FBtr0345985;FBtr0071225	28.2666	28.6985	28.6469	28.374	28.3245	28.5717	27.83	28.3165	0.421923	0.427798	0.235868	FALSE	Ppt1
FBtr0071228	22.227	23.7122	21.8798	27.3173	21.8798	21.8798	21.8798	21.8798	0.387698	0.496029	1.90431	FALSE	Caf1-180
FBtr0332628;FBtr0300731;FBtr0071231;FBtr0071230	21.8798	21.8798	21.8798	21.8798	21.8798	21.8798	21.8798	21.8798	0.421923	0	0	FALSE	spirit
FBtr0331726;FBtr0071232	21.8798	21.8798	21.8798	21.8798	27.8807	27.494	27.9	27.8144	1.23386e-07	0.934692	-5.89249	TRUE	CG12111
FBtr0071234	21.8798	21.8798	23.6959	21.8798	21.8798	21.8798	21.8798	21.8798	0.421923	0.353553	0.454034	FALSE	IntS4
FBtr0071235	22.9882	21.8798	22.7252	23.8128	21.8798	21.8798	21.8798	21.8798	0.162918	0.660174	0.971722	FALSE	PIP82
FBtr0343354;FBtr0071239;FBtr0343355;FBtr0071243	21.8798	21.8798	21.8798	21.8798	21.8798	21.8798	21.8798	21.8798	0.421923	0	0	FALSE	CG33223;CG32713
FBtr0071241	30.032	29.9896	29.9081	30.2241	29.1267	29.2086	28.832	29.0355	0.00133525	0.905152	0.987748	FALSE	Sptr
FBtr0071242;FBtr0302500	30.271	29.8815	29.6458	31.0089	29.8563	29.8909	30.243	29.1227	0.421923	0.387476	0.423567	FALSE	CG15347
FBtr0071245	23.1651	23.2251	21.8798	21.8798	21.8798	21.8798	21.8798	21.8798	0.331486	0.539875	0.657662	FALSE	CG12123
FBtr0345986;FBtr0300383;FBtr0071246	26.4139	26.4506	26.5262	25.5306	24.3951	26.7831	26.0254	26.3743	0.638895	0.217572	0.335861	FALSE	CG12125
FBtr0071249	29.0188	28.5589	29.2132	28.0305	29.7847	29.6603	29.0311	29.45	0.154075	0.667593	-0.776192	FALSE	Hexo2
FBtr0071250	25.6596	23.4887	21.8798	26.2662	21.8798	21.8798	21.8798	21.8798	0.166026	0.657544	2.44378	FALSE	CG1785
FBtr0346163;FBtr0071255	26.2599	26.8689	26.7453	25.5254	21.8798	21.8798	21.8798	21.8798	0.000150671	0.922648	4.47012	TRUE	Rbm13
FBtr0071263	23.6773	23.7908	23.2785	21.8798	21.8798	21.8798	24.4699	26.1132	0.762669	0.143358	-0.429081	FALSE	CG10962
FBtr0333605;FBtr0333604;FBtr0310067;FBtr0071267;FBtr0071266	27.847	27.657	28.0681	27.2656	26.8552	27.5733	27.2232	26.6106	0.173885	0.651303	0.643878	FALSE	e(r)
FBtr0333606;FBtr0071268	30.8319	30.8207	30.7058	30.0096	30.5222	30.4846	30.7546	30.8864	0.799418	0.121385	-0.0699858	FALSE	CG1885
FBtr0071277;FBtr0071276;FBtr0071275;FBtr0071274;FBtr0071273;FBtr0071269;FBtr0308194;FBtr0071278;FBtr0331601;FBtr0071271;FBtr0308193;FBtr0071270;FBtr0071272	33.1782	33.1709	33.285	33.4309	33.188	33.0933	32.9393	32.7169	0.176465	0.649031	0.281903	FALSE	Moe
FBtr0071280;FBtr0344164	26.0339	27.4141	26.9623	23.0124	21.8798	21.8798	21.8798	21.8798	0.0380017	0.798519	3.97591	FALSE	l(1)G0020
FBtr0346167;FBtr0332960;FBtr0332958;FBtr0332957;FBtr0071281	30.075	30.5238	30.1066	29.5129	30.5841	30.3564	30.6552	30.5235	0.209374	0.623317	-0.475223	FALSE	CG2004
FBtr0309871;FBtr0301805;FBtr0071284	25.5636	21.8798	21.8798	26.2443	21.8798	21.8798	21.8798	21.8798	0.33159	0.537504	2.01209	FALSE	HP1b
FBtr0309872;FBtr0071285	21.8798	21.8798	21.8798	21.8798	21.8798	21.8798	21.8798	21.8798	0.421923	0	0	FALSE	APC4
FBtr0071286	21.8798	22.6766	21.8798	26.5938	21.8798	21.8798	21.8798	21.8798	0.421923	0.417455	1.37771	FALSE	CG32708
FBtr0071289	33.3992	33.2686	33.318	33.4708	31.7708	32.1611	31.6978	31.9818	0.000294524	0.918758	1.46129	FALSE	CG7033
FBtr0071293	25.9318	25.5405	23.4812	22.7706	25.3239	26.139	26.205	26.3105	0.26691	0.581629	-1.56358	FALSE	Arfrp1
FBtr0333808;FBtr0309254;FBtr0112965;FBtr0071298;FBtr0071295;FBtr0309255;FBtr0071297	22.1685	23.0409	21.8798	23.0152	24.0625	23.5597	21.8798	23.1853	0.421923	0.402811	-0.645733	FALSE	AP-1gamma
FBtr0071299	24.3581	21.8798	25.0207	24.2564	22.4237	24.6388	23.6461	24.1158	0.87205	0.0787269	0.172665	FALSE	CG7065
FBtr0071300	23.0884	21.8798	23.2323	26.2328	21.8798	21.8798	21.8798	21.8798	0.289421	0.567016	1.72855	FALSE	dalao
FBtr0071302;FBtr0333472	21.8798	21.8798	21.8798	21.8798	21.8798	21.8798	21.8798	21.8798	0.421923	0	0	FALSE	Dip1
FBtr0333475;FBtr0333473;FBtr0071303;FBtr0340341;FBtr0333474	21.8798	21.8798	21.8798	21.8798	21.8798	21.8798	21.8798	21.8798	0.421923	0	0	FALSE	mei-P26
FBtr0332623;FBtr0071304	21.8798	21.8798	21.8798	21.8798	21.8798	21.8798	21.8798	21.8798	0.421923	0	0	FALSE	CG12057
FBtr0071305	25.8381	26.1776	21.8798	25.3977	26.0793	26.0339	26.198	26.6594	0.421923	0.467459	-1.41933	FALSE	CG12056
FBtr0071306	23.1111	21.9923	22.5027	23.433	21.8798	21.8798	23.074	22.8408	0.54301	0.277086	0.341166	FALSE	CG12106
FBtr0346164;FBtr0071309	28.7532	28.0951	28.8151	28.333	30.223	29.965	30.1885	29.7808	0.0031665	0.8911	-1.54022	FALSE	CG15369
FBtr0071313;FBtr0340120	27.3777	27.2512	26.7054	26.9887	26.9906	26.2125	26.0205	26.6054	0.173317	0.651823	0.623461	FALSE	Dsor1
FBtr0340121;FBtr0340122;FBtr0071315;FBtr0340123;FBtr0071316;FBtr0071314	21.8798	21.8798	21.8798	21.8798	21.8798	21.8798	21.8798	21.8798	0.421923	0	0	FALSE	CG17754
FBtr0346166;FBtr0071317	25.748	23.0418	25.8509	26.0823	24.2951	24.2585	23.2444	22.6428	0.276845	0.575109	1.57056	FALSE	ric8a
FBtr0339949;FBtr0071319	27.0056	27.3186	26.3942	26.603	23.0813	24.2443	24.0231	21.8798	0.00799446	0.868241	3.52324	TRUE	CG16892
FBtr0071321;FBtr0334929	28.8795	29.1116	28.7378	28.4571	29.0212	29.2116	28.3436	29.1266	0.666644	0.200374	-0.129262	FALSE	c12.2
FBtr0071324	21.8798	21.8798	21.8798	21.8798	21.8798	21.8798	21.8798	21.8798	0.421923	0	0	FALSE	c12.1
FBtr0343368;FBtr0071326	28.813	29.425	29.267	27.3207	29.5265	29.6634	29.095	28.9833	0.421923	0.412632	-0.610636	FALSE	c11.1
FBtr0302964;FBtr0071327	21.8798	21.8798	21.8798	21.8798	21.8798	21.8798	21.8798	21.8798	0.421923	0	0	FALSE	Cfp1
FBtr0343367;FBtr0071332	21.8798	21.8798	21.8798	21.8798	21.8798	21.8798	22.0979	23.8247	0.421923	0.397088	-0.54077	FALSE	mxc
FBtr0071334	21.8798	21.8798	21.8798	21.8798	21.8798	21.8798	21.8798	21.8798	0.421923	0	0	FALSE	CG12121
FBtr0340327;FBtr0071335	31.044	30.7149	30.9956	30.7209	31.4637	31.218	31.1311	31.5478	0.0568602	0.771175	-0.4713	FALSE	t
FBtr0340494;FBtr0071336	30.4158	30.3224	30.3871	30.1004	29.7069	29.6512	29.3025	29.5537	0.00597546	0.876586	0.752837	FALSE	CG12119
FBtr0071338	30.4956	30.7566	30.6984	30.1029	30.683	30.8807	30.9364	30.7895	0.263509	0.583942	-0.309035	FALSE	su(r)
FBtr0071341	21.8798	21.8798	21.8798	21.8798	21.8798	21.8798	21.8798	21.8798	0.421923	0	0	FALSE	CG12115
FBtr0071342	28.6832	28.1195	28.5095	29.3661	25.0011	25.4553	25.4699	22.7543	0.0103469	0.860079	3.99943	FALSE	Zpr1
FBtr0340342;FBtr0071343	31.6996	31.0783	31.0381	31.0321	31.7243	31.3785	31.1966	31.6178	0.421923	0.445327	-0.26727	FALSE	CG9034
FBtr0071344	30.1135	29.985	30.5545	29.5774	31.0014	30.7045	30.0903	30.1757	0.410738	0.481454	-0.435389	FALSE	Ost48
FBtr0340343;FBtr0333537;FBtr0333536;FBtr0079010;FBtr0071347;FBtr0071346;FBtr0071345	21.8798	24.7278	21.8798	21.8798	21.8798	23.8963	21.8798	21.8798	0.852835	0.0905699	0.207883	FALSE	His3.3B;His3.3A
FBtr0071348	27.2751	26.9657	27.5424	28.2506	26.9516	21.9453	27.2608	24.8354	0.310715	0.553785	2.26015	FALSE	fh
FBtr0333809;FBtr0071350	21.8798	21.8798	21.8798	21.8798	21.8798	21.8798	21.8798	21.8798	0.421923	0	0	FALSE	Bx42
FBtr0114595;FBtr0071351;FBtr0114594	28.084	27.9067	28.1047	24.6751	27.8605	27.7905	28.0242	27.7789	0.523385	0.289284	-0.670916	FALSE	CG7766
FBtr0071353	25.3766	26.5892	24.9137	23.9272	21.8798	21.8798	21.8798	21.8798	0.00858268	0.866281	3.32189	TRUE	CG7246
FBtr0071358	24.8154	21.8798	21.8798	24.3567	21.8798	21.8798	21.8798	21.8798	0.33159	0.537495	1.35314	FALSE	BCL7-like
FBtr0343411;FBtr0071360	33.4654	32.8832	32.5418	34.2777	32.0787	32.2655	31.9128	32.0352	0.0846882	0.738525	1.21898	FALSE	RpS28b
FBtr0071361;FBtr0333335;FBtr0071362	32.7248	33.216	33.0615	32.2417	32.9789	32.9551	32.8608	33.0326	0.593615	0.245727	-0.145836	FALSE	Hex-A
FBtr0071363	24.1704	26.1339	24.8011	24.8094	21.8798	21.8798	21.8798	21.8798	0.00346137	0.889205	3.09894	TRUE	Gga
FBtr0071366	24.1093	23.1821	24.1684	22.7142	21.8798	21.8798	24.5038	21.8798	0.421923	0.451345	1.00774	FALSE	Aats-lys
FBtr0071368	26.0284	26.5552	26.6722	26.4184	21.6012	25.3817	24.4602	24.1344	0.0909022	0.7317	2.52422	FALSE	Lst8
FBtr0343412;FBtr0071372	29.4221	29.7402	28.9751	30.2052	29.3643	29.5792	28.2928	29.0645	0.421923	0.447422	0.510509	FALSE	l(1)G0320
FBtr0346170;FBtr0336923;FBtr0307489;FBtr0071386	21.8798	21.8798	21.8798	21.8798	21.8798	21.8798	21.8798	21.8798	0.421923	0	0	FALSE	CG32698
FBtr0071387	21.8798	21.8798	21.8798	21.8798	23.3132	23.5103	25.1703	23.9609	0.0162729	0.842039	-2.10889	FALSE	Ser7
FBtr0071388	24.126	24.4253	24.5939	23.8141	24.9337	23.3404	24.9262	21.8798	0.617056	0.230916	0.469809	FALSE	CG1468
FBtr0071389	27.3077	22.6346	26.1745	26.6645	23.4411	24.4638	23.0098	23.3363	0.264875	0.582996	2.13255	FALSE	CG9686
FBtr0340682;FBtr0071390	21.8798	21.8798	21.8798	21.8798	23.8465	21.8798	21.8798	21.8798	0.421923	0.353553	-0.491683	FALSE	CG9689
FBtr0071392;FBtr0071391	28.5779	28.1995	28.3774	28.9664	28.8151	28.6674	29.8011	28.7629	0.383672	0.498573	-0.481309	FALSE	CG9691
FBtr0343030;FBtr0071394;FBtr0071393	33.4875	33.1396	33.3292	33.988	33.1215	33.2035	33.1907	33.2178	0.346326	0.523378	0.302692	FALSE	Idgf4
FBtr0333521;FBtr0302723;FBtr0071402;FBtr0302722	21.8798	21.8798	21.8798	21.8798	21.8798	21.8798	21.8798	21.8798	0.421923	0	0	FALSE	nej
FBtr0346168;FBtr0071403	23.9079	23.5312	25.0528	23.7508	26.5823	25.634	25.427	21.8798	0.545451	0.275598	-0.820105	FALSE	CG3106
FBtr0303558;FBtr0071404;FBtr0071406;FBtr0071405;FBtr0100193;FBtr0333427;FBtr0303559;FBtr0100192;FBtr0071407	22.8069	23.5228	25.7115	22.7863	25.5713	23.2053	23.6823	24.3931	0.6376	0.218406	-0.506097	FALSE	l(1)G0232
FBtr0112969;FBtr0071408;FBtr0336905	24.0086	21.8798	21.8798	22.7364	21.8798	21.8798	23.5664	23.8001	0.867574	0.0814717	-0.155385	FALSE	CG1889
FBtr0307382;FBtr0071410	29.304	29.34	28.9644	29.3459	28.6793	28.9921	29.6952	29.0072	0.617872	0.230325	0.145111	FALSE	CG32694
FBtr0307381;FBtr0071412;FBtr0071411	28.3172	27.6473	28.0706	27.6389	28.6042	28.5792	28.79	28.4408	0.0473865	0.784549	-0.685035	FALSE	CG32694
FBtr0071415;FBtr0112971	24.034	23.6484	25.815	25.6848	21.8798	21.8798	21.8798	21.8798	0.0145067	0.847189	2.91577	FALSE	CG2990
FBtr0346261;FBtr0071419	37.1937	37.0608	37.0699	37.8617	27.9313	28.1441	28.1511	30.8739	0.000467013	0.915637	8.52141	TRUE	Yp1
FBtr0339648;FBtr0071424	36.4002	36.264	36.1165	37.2351	26.746	27.4629	28.4033	30.862	0.00180495	0.900623	8.13541	TRUE	Yp2
FBtr0340473;FBtr0071430	23.5219	21.8798	21.8798	22.477	21.8798	21.8798	21.8798	21.8798	0.421499	0.475448	0.559856	FALSE	CG2972
FBtr0343981;FBtr0332896;FBtr0071438	34.7005	34.202	34.9267	34.9893	34.4515	34.8955	35.3761	35.0493	0.465787	0.32548	-0.238463	FALSE	l(1)G0230
FBtr0114585;FBtr0071439;FBtr0343023;FBtr0112675;FBtr0343022;FBtr0343025;FBtr0343026;FBtr0343024;FBtr0114584;FBtr0343027	21.8798	21.8798	21.8798	21.8798	23.8277	24.3333	24.5275	23.5326	0.0012612	0.905972	-2.17549	TRUE	CG34408
FBtr0071444	21.8798	21.8798	21.8798	21.8798	21.8798	21.8798	21.8798	21.8798	0.421923	0	0	FALSE	CG17841
FBtr0071446;FBtr0333305;FBtr0071447	28.188	28.6867	28.7277	28.5007	28.7218	28.4917	28.3988	28.5192	0.96876	0.0192983	-0.00710262	FALSE	flw
FBtr0332952;FBtr0071449	29.8778	30.5791	30.6171	30.3987	31.026	30.3739	31.1268	30.4431	0.420556	0.476092	-0.374289	FALSE	Neb-cGP
FBtr0071453;FBtr0071452;FBtr0071451;FBtr0336899	28.4306	28.08	28.2028	29.4876	25.6025	21.8798	23.858	23.9891	0.0105264	0.859544	4.71791	FALSE	PPP4R2r
FBtr0332953;FBtr0307488;FBtr0071461;FBtr0071460	27.3885	27.0262	26.0082	30.1101	21.8798	21.8798	21.8798	21.8798	0.00598738	0.876471	5.75346	TRUE	nocte
FBtr0346350;FBtr0333306;FBtr0071465	24.1485	21.8798	21.8798	28.3565	21.8798	21.8798	21.8798	21.8798	0.421923	0.472089	2.18635	FALSE	Psf3
FBtr0071469	21.8798	21.8798	21.8798	21.8798	21.8798	21.8798	21.8798	21.8798	0.421923	0	0	FALSE	CG32679
FBtr0347009;FBtr0347008;FBtr0071470	27.2599	27.0572	27.3602	23.969	27.14	27.2387	26.9444	26.3888	0.621429	0.228118	-0.516418	FALSE	l(1)G0289
FBtr0071472	32.626	32.5056	32.2804	32.5206	32.4229	32.4313	32.9263	33.0274	0.421923	0.423814	-0.218832	FALSE	Gip
FBtr0071481	21.8798	21.8798	21.8798	21.8798	21.8798	21.8798	21.8798	21.8798	0.421923	0	0	FALSE	CG12643
FBtr0346337;FBtr0346336;FBtr0071484	21.8798	21.8798	21.8798	21.8798	23.7434	23.7089	23.4506	24.7697	0.00458797	0.882894	-2.0384	TRUE	Ipod
FBtr0071486	21.8798	21.8798	21.8798	21.8798	21.8798	21.8798	21.8798	21.8798	0.421923	0	0	FALSE	CG2962
FBtr0332900;FBtr0332899;FBtr0332898;FBtr0112974;FBtr0071487	21.8798	21.8798	21.8798	21.8798	21.8798	21.8798	21.8798	21.8798	0.421923	0	0	FALSE	CG15309
FBtr0071489;FBtr0308583;FBtr0308584;FBtr0308582	21.8798	21.8798	21.8798	21.8798	21.8798	21.8798	21.8798	21.8798	0.421923	0	0	FALSE	ZAP3
FBtr0071491	24.0573	23.3867	23.9171	21.8798	23.2686	24.2198	21.8798	23.4977	0.917737	0.0511995	0.0937814	FALSE	CG2124
FBtr0343043;FBtr0332294;FBtr0071495;FBtr0071494	30.3347	30.6182	30.3445	30.5842	28.6481	28.6852	28.5657	28.5163	1.93538e-05	0.929644	1.86654	FALSE	ras
FBtr0071498	29.0493	28.9864	28.2053	28.9226	28.5686	28.5386	28.6452	28.2184	0.421923	0.4557	0.298235	FALSE	Atg8a
FBtr0346377;FBtr0334457;FBtr0300569;FBtr0071501;FBtr0071500;FBtr0071499	26.0862	26.8561	26.5952	25.3124	26.7382	27.2161	26.5472	26.7297	0.356957	0.51469	-0.595324	FALSE	Tango5
FBtr0310444;FBtr0071510	21.8798	21.8798	21.8798	21.8798	26.8535	26.3063	26.6988	26.606	8.52752e-07	0.933759	-4.73639	TRUE	CG1628
FBtr0071511	21.8798	22.7435	21.8798	23.4226	21.8798	24.8011	24.4022	21.8798	0.48653	0.312678	-0.759292	FALSE	Hmr
FBtr0071515;FBtr0332465;FBtr0113368;FBtr0342794	21.8798	21.8798	21.8798	21.8798	21.8798	21.8798	21.8798	21.8798	0.421923	0	0	FALSE	Ipk1
FBtr0071519	33.8542	33.9974	34.1488	33.6206	34.1972	33.8503	34.0289	34.114	0.421923	0.37072	-0.142356	FALSE	Act57B
FBtr0071520	29.05	29.2367	29.0436	30.2589	26.8795	27.1387	27.3604	28.017	0.0128985	0.851948	2.04841	FALSE	CG9344
FBtr0071522	32.3948	32.1184	32.507	33.0575	31.8131	32.0694	32.1164	31.9194	0.141613	0.678735	0.53985	FALSE	Prosalpha3
FBtr0332593;FBtr0071524;FBtr0332594;FBtr0303195	21.8798	21.8798	24.0262	21.8798	21.8798	21.8798	21.8798	21.8798	0.421923	0.353553	0.536608	FALSE	CG10543
FBtr0071526	21.8798	21.8798	21.8798	21.8798	21.8798	21.8798	21.8798	21.8798	0.421923	0	0	FALSE	CG9346
FBtr0310056;FBtr0113371;FBtr0071528;FBtr0301898;FBtr0342839;FBtr0310057;FBtr0113369;FBtr0071527;FBtr0301902;FBtr0301894;FBtr0301901;FBtr0301896	25.4858	23.4703	26.3887	24.8768	26.2341	25.0284	26.6934	26.8681	0.37904	0.501304	-1.15056	FALSE	RIC-3
FBtr0071530	30.0904	30.2433	31.0487	29.2948	31.0982	30.8049	31.1333	30.8182	0.217917	0.616536	-0.794331	FALSE	CG9350
FBtr0071532	29.9067	29.8604	30.2007	29.6389	29.7647	29.9845	29.9414	29.5079	0.605269	0.238025	0.10205	FALSE	cpa
FBtr0071533	26.0622	26.7321	26.2124	26.8136	21.8798	23.9746	22.7794	21.8798	0.00401955	0.885775	3.82668	TRUE	mRpL54
FBtr0071534	23.71	22.9282	24.0325	22.1423	21.8798	21.8798	21.8798	21.8798	0.0862054	0.736646	1.32348	FALSE	Cht8
FBtr0332423;FBtr0071537;FBtr0071536;FBtr0071535;FBtr0071540;FBtr0071539;FBtr0071538	31.9947	32.0618	32.0686	31.8375	32.3982	32.1365	32.4358	32.4586	0.0389494	0.796991	-0.36662	FALSE	Treh
FBtr0071541	33.1133	33.2675	33.2688	33.5185	33.175	32.9681	33.1156	33.2973	0.421923	0.467656	0.153011	FALSE	CG10527
FBtr0071542	21.8798	21.8798	21.8798	21.8798	21.8798	21.8798	21.8798	21.8798	0.421923	0	0	FALSE	Cht9
FBtr0071543	21.8798	21.8798	21.8798	21.8798	21.8798	21.8798	21.8798	21.8798	0.421923	0	0	FALSE	Cht4
FBtr0071545	21.8798	21.8798	21.8798	21.8798	22.9566	22.8949	23.8998	23.7567	0.0105264	0.859524	-1.49723	FALSE	CG15653
FBtr0071546	27.8695	28.2585	27.1997	27.7605	25.6031	24.2213	25.8759	23.4018	0.0197992	0.83343	2.99652	FALSE	shg
FBtr0071547	24.1229	24.0372	26.7095	26.3797	21.8798	21.8798	25.6396	23.2561	0.283497	0.570733	2.14852	FALSE	CG3295
FBtr0071549	29.14	28.8327	28.6868	29.1283	28.9384	28.5296	29.1057	29.1293	0.92704	0.0453683	0.0212165	FALSE	CG30291
FBtr0345667;FBtr0071554	21.8798	21.8798	21.8798	21.8798	21.8798	21.8798	21.8798	21.8798	0.421923	0	0	FALSE	CG15650
FBtr0300563;FBtr0071555	21.8798	21.8798	21.8798	21.8798	22.9432	25.9672	23.1233	24.1942	0.0858252	0.737271	-2.17717	FALSE	CG15649
FBtr0071560	27.0724	26.1487	23.0324	24.6625	26.974	26.3889	26.7987	27.5848	0.291871	0.565398	-1.70758	FALSE	CG9993
FBtr0344196;FBtr0342801;FBtr0071563	21.8798	21.8798	25.0927	21.8798	24.0023	25.3956	25.1651	25.0915	0.140922	0.679636	-2.23063	FALSE	sktl
FBtr0345356;FBtr0071567	29.0494	29.5531	29.5246	29.2062	30.2673	29.868	30.4329	30.3275	0.0157125	0.84349	-0.890632	FALSE	CG9394
FBtr0071569	27.3729	27.6009	27.2993	25.8915	25.7653	23.9552	23.1832	27.203	0.240992	0.599553	2.01448	FALSE	mago
FBtr0071573	21.8798	21.8798	21.8798	21.8798	21.8798	21.8798	21.8798	21.8798	0.421923	0	0	FALSE	Hmg-2
FBtr0071576	21.8798	21.8798	22.7192	21.8798	21.8798	21.8798	21.8798	21.8798	0.421923	0.353553	0.209847	FALSE	Xpd
FBtr0071580;FBtr0071579	21.8798	21.8798	21.8798	21.8798	21.8798	21.8798	21.8798	21.8798	0.421923	0	0	FALSE	Pu
FBtr0305669;FBtr0071593;FBtr0071592	30.4938	31.2799	31.1515	31.2863	30.2703	29.6915	29.4319	29.8129	0.019098	0.835152	1.2512	FALSE	RpL29
FBtr0071600;FBtr0310327;FBtr0300395;FBtr0071599;FBtr0300394	21.8798	21.8798	21.8798	21.8798	21.8798	24.741	21.8798	21.8798	0.421923	0.353553	-0.715298	FALSE	CG9485
FBtr0342891;FBtr0071606	23.9283	27.6676	26.9336	27.1766	27.7513	27.9596	28.4258	27.8209	0.304722	0.55731	-1.5629	FALSE	Acox57D-p
FBtr0071607	27.2799	27.4579	25.6711	26.3939	23.4262	21.8798	21.8798	21.8798	0.00292285	0.892669	4.43433	TRUE	Acox57D-d
FBtr0071611	21.8798	21.8798	21.8798	21.8798	21.8798	21.8798	21.8798	21.8798	0.421923	0	0	FALSE	CG17974
FBtr0071612	21.8798	21.8798	21.8798	21.8798	21.8798	21.8798	21.8798	21.8798	0.421923	0	0	FALSE	CG9822
FBtr0071615	21.8798	21.8798	21.8798	21.8798	21.8798	21.8798	21.8798	21.8798	0.421923	0	0	FALSE	CG9754
FBtr0071616	28.8495	28.7789	28.6772	28.8965	21.8798	21.8798	21.8798	21.8798	7.92826e-09	0.935281	6.92074	TRUE	CG9752
FBtr0342888;FBtr0071617	21.8798	21.8798	21.8798	23.3803	21.8798	21.8798	21.8798	21.8798	0.421923	0.353553	0.37513	FALSE	Sgf29
FBtr0342889;FBtr0071618	27.5216	27.0321	26.988	26.7778	26.6264	26.8861	26.4586	27.0095	0.342079	0.526605	0.334755	FALSE	CG30392
FBtr0071619	21.8798	21.8798	21.8798	21.8798	21.8798	21.8798	21.8798	21.8798	0.421923	0	0	FALSE	CG10505
FBtr0110814;FBtr0071624	21.8798	25.344	22.6701	21.8798	21.8798	21.8798	21.8798	24.0467	0.67056	0.197947	0.521934	FALSE	CG15661
FBtr0071625	30.7229	30.6928	30.6991	29.994	31.2017	31.3457	31.5768	31.6404	0.025918	0.81987	-0.91395	FALSE	CG4302
FBtr0071627	21.8798	21.8798	21.8798	21.8798	26.2285	26.7115	21.8798	21.8798	0.331486	0.539068	-2.29511	FALSE	CG4286
FBtr0071628	28.8389	28.231	28.426	29.4913	27.1506	26.9012	27.6187	27.3489	0.0214248	0.829536	1.49194	FALSE	LSm1
FBtr0342871;FBtr0071629;FBtr0113100	26.9709	26.3783	26.9015	26.009	21.8798	24.5413	24.2585	24.114	0.0275525	0.816671	2.86652	FALSE	CG4266
FBtr0310423;FBtr0071633;FBtr0071632;FBtr0330236;FBtr0330235	21.8798	21.8798	21.8798	21.8798	21.8798	21.8798	21.8798	21.8798	0.421923	0	0	FALSE	CG30389
FBtr0342874;FBtr0342873;FBtr0071636	25.1606	23.0683	21.8798	22.8214	21.8798	21.8798	21.8798	21.8798	0.263881	0.583579	1.35274	FALSE	Magi
FBtr0071638;FBtr0071637	22.8021	23.8429	21.8798	25.0139	23.5539	23.7774	22.2895	21.8798	0.618547	0.229893	0.509513	FALSE	CG4050
FBtr0071639	30.7111	30.6883	30.3942	31.6974	27.6637	28.3987	26.9074	28.0538	0.00387979	0.886576	3.11685	TRUE	CG4038
FBtr0071640	21.8798	23.8291	22.9841	23.7257	21.8798	21.8798	21.8798	21.8798	0.124802	0.69562	1.22487	FALSE	Rbpn-5
FBtr0071641	21.8798	21.8798	21.8798	21.8798	24.3979	22.6189	21.8798	21.8798	0.421923	0.456806	-0.8143	FALSE	Sara
FBtr0071653;FBtr0071654	21.8798	21.8798	21.8798	21.8798	22.4719	21.8798	21.8798	21.8798	0.421923	0.353553	-0.148039	FALSE	Egfr
FBtr0304728;FBtr0071658	26.2472	27.2601	26.8882	26.1636	21.8798	21.8798	21.8798	21.8798	5.24281e-05	0.926991	4.76001	TRUE	mahj
FBtr0342954;FBtr0071659	21.8798	21.8798	21.8798	21.8798	21.8798	21.8798	21.8798	21.8798	0.421923	0	0	FALSE	CG15674
FBtr0071662;FBtr0071661	21.8798	21.8798	21.8798	21.8798	21.8798	21.8798	21.8798	21.8798	0.421923	0	0	FALSE	CG10082
FBtr0300680;FBtr0300679;FBtr0113102;FBtr0113101;FBtr0071663	31.8764	32.0086	32.4288	31.5898	32.5147	32.4746	32.5513	32.5877	0.0840142	0.739117	-0.55617	FALSE	CG10320
FBtr0071666	21.8798	24.5653	23.1912	23.0954	21.8798	21.8798	21.8798	21.8798	0.174179	0.650963	1.30315	FALSE	NC2alpha
FBtr0071670	31.0971	31.5049	31.6131	31.5579	29.9088	30.104	30.1635	29.8489	0.000888454	0.909974	1.43692	FALSE	CG10306
FBtr0342959;FBtr0071672	26.4281	26.5597	25.6412	26.8571	25.6954	26.3879	21.8798	26.4258	0.421923	0.395185	1.2743	FALSE	Ppcdc
FBtr0345488;FBtr0342960;FBtr0071674;FBtr0071673	28.952	28.6514	28.9816	29.37	29.5733	28.6327	29.1336	27.8998	0.712829	0.172925	0.178842	FALSE	HmgZ
FBtr0071677;FBtr0071676	27.2799	27.062	27.0536	27.9787	26.9388	26.2124	27.0648	26.7052	0.22156	0.613763	0.613261	FALSE	Tim10
FBtr0071679	21.8798	21.8798	21.8798	21.8798	21.8798	21.8798	21.8798	21.8798	0.421923	0	0	FALSE	Tbp
FBtr0071683	28.8518	28.6831	29.0628	29.7039	27.63	27.0606	25.6246	27.2162	0.0256806	0.820447	2.19254	FALSE	Rae1
FBtr0071687	26.0762	26.523	24.8569	25.341	22.8499	24.9555	23.9762	24.0634	0.0930536	0.729471	1.73805	FALSE	clt
FBtr0345664;FBtr0071688	21.8798	21.8798	21.8798	21.8798	21.8798	21.8798	21.8798	21.8798	0.421923	0	0	FALSE	CG18870
FBtr0344882;FBtr0071690	21.8798	21.8798	21.8798	24.0501	21.8798	21.8798	21.8798	21.8798	0.421923	0.353553	0.542587	FALSE	CG10433
FBtr0071701	21.8798	21.8798	21.8798	21.8798	21.8798	21.8798	21.8798	21.8798	0.421923	0	0	FALSE	TAF1C-like
FBtr0342897;FBtr0342896;FBtr0300397;FBtr0071703	28.3549	23.8684	27.2505	28.83	28.0703	22.3837	28.5403	28.4676	0.931013	0.0429464	0.210467	FALSE	Fkbp14
FBtr0273206;FBtr0071706;FBtr0342893;FBtr0342894;FBtr0342892;FBtr0071707;FBtr0342895	21.8798	23.3498	24.0884	21.8798	24.359	24.1426	21.8798	23.7186	0.461201	0.328637	-0.725557	FALSE	Sdc
FBtr0345487;FBtr0301410;FBtr0071709;FBtr0071708	29.3251	28.6502	29.2779	30.0505	27.7407	24.3219	24.3253	24.9018	0.0228724	0.82651	4.00352	FALSE	HmgD
FBtr0071712;FBtr0071711;FBtr0071713	24.533	25.5211	24.211	21.2197	26.8341	26.9483	21.8798	21.8798	0.81293	0.113458	-0.514282	FALSE	LBR
FBtr0071714	21.8798	21.8798	21.8798	21.8798	23.8314	24.4402	24.7647	23.1664	0.00775365	0.869169	-2.17088	TRUE	Grx-1
FBtr0071716	21.8798	21.8798	21.8798	21.8798	21.8798	22.8192	26.8124	25.7797	0.232473	0.605515	-2.443	FALSE	CG4021
FBtr0071739	21.8798	21.8798	26.3231	21.8798	26.2882	26.8601	27.8996	27.5552	0.0571081	0.770821	-4.16016	FALSE	CG4377
FBtr0071740	28.7897	27.4205	28.6442	27.4754	29.8316	29.1249	30.4175	30.1793	0.0419478	0.792117	-1.80588	FALSE	CG4363
FBtr0071743	21.8798	21.8798	21.8798	21.8798	21.8798	21.8798	21.8798	21.8798	0.421923	0	0	FALSE	CG4386
FBtr0071744	21.8798	21.8798	21.8798	21.8798	21.8798	21.8798	21.8798	21.8798	0.421923	0	0	FALSE	CG18735
FBtr0071745	23.8056	24.4639	21.8798	21.8798	25.5878	21.8798	21.8798	21.8798	0.89183	0.0669498	0.200492	FALSE	lox2
FBtr0071747;FBtr0071746;FBtr0342965	27.6283	27.7691	27.7382	27.54	27.7103	27.5332	27.3519	27.354	0.307644	0.555455	0.181552	FALSE	Tango11
FBtr0308239;FBtr0071757;FBtr0071756	28.0413	28.0242	28.4446	27.0919	28.4187	28.008	28.2249	28.1235	0.432019	0.347254	-0.293241	FALSE	Synj
FBtr0071758	21.8798	21.8798	21.8798	21.8798	21.8798	23.3101	21.8798	21.8798	0.421923	0.353553	-0.357586	FALSE	CG6613
FBtr0071760	23.8407	23.5779	24.3505	23.3305	21.8798	21.8798	21.8798	21.8798	0.0018546	0.900261	1.89513	FALSE	CG30281
FBtr0342979;FBtr0071761	21.8798	21.8798	21.8798	21.8798	21.8798	22.0755	23.4575	23.9875	0.286244	0.569092	-0.970308	FALSE	mei-S332
FBtr0308350;FBtr0071762	21.8798	21.8798	23.2498	21.8798	21.8798	21.8798	21.8798	21.8798	0.421923	0.353553	0.342511	FALSE	NtR
FBtr0071766	21.8798	21.8798	21.8798	21.8798	25.7774	25.9297	24.2385	25.5349	0.00156761	0.902896	-3.49036	TRUE	gom
FBtr0071767	21.8798	21.8798	21.8798	21.8798	21.8798	21.8798	21.8798	21.8798	0.421923	0	0	FALSE	CG6758
FBtr0071770	21.8798	21.8798	21.8798	21.8798	21.8798	21.8798	21.8798	21.8798	0.421923	0	0	FALSE	MED16
FBtr0071772;FBtr0071771	29.2339	29.2884	29.4666	28.6183	29.5565	29.4342	29.4144	29.9198	0.262068	0.585105	-0.429422	FALSE	Vps35
FBtr0071774	21.8798	21.8798	21.8798	21.8798	23.4847	22.7763	23.7035	21.8798	0.13615	0.684485	-1.08129	FALSE	ari-2
FBtr0071776;FBtr0071775	21.8798	21.8798	21.8798	21.8798	21.8798	21.8798	21.8798	21.8798	0.421923	0	0	FALSE	dve
FBtr0301476;FBtr0113105;FBtr0071777	22.5191	23.2635	24.0293	21.8798	25.2478	23.9695	23.9199	24.1025	0.157803	0.664266	-1.38699	FALSE	Oatp58Dc
FBtr0345581;FBtr0071781	21.8798	21.8798	21.8798	21.8798	21.8798	21.8798	21.8798	21.8798	0.421923	0	0	FALSE	CG3264
FBtr0071782	28.3676	28.2109	28.1576	28.7208	28.3606	28.4191	28.8946	28.465	0.436172	0.344316	-0.170598	FALSE	CG3290
FBtr0071783	21.8798	21.8798	21.8798	21.8798	21.8798	21.8798	21.8798	21.8798	0.421923	0	0	FALSE	CG3292
FBtr0071785;FBtr0071784	31.959	32.0637	32.132	32.5147	31.6788	31.5573	31.8362	31.8257	0.0799023	0.743374	0.442867	FALSE	Swim
FBtr0071787	21.8798	21.8798	21.8798	21.8798	21.8798	21.8798	21.8798	21.8798	0.421923	0	0	FALSE	CG3045
FBtr0071790	21.8798	21.8798	21.8798	24.1032	21.8798	21.8798	23.2974	24.5202	0.663581	0.202325	-0.458653	FALSE	GM130
FBtr0302298;FBtr0071792;FBtr0302295;FBtr0071795;FBtr0071794;FBtr0071793;FBtr0071791;FBtr0071796;FBtr0342980;FBtr0302297;FBtr0302296;FBtr0113104	21.8798	21.8798	21.8798	21.8798	21.8798	21.8798	21.8798	21.8798	0.421923	0	0	FALSE	Vrp1
FBtr0336636;FBtr0071797;FBtr0336637;FBtr0300693;FBtr0336638	21.8798	21.8798	21.8798	23.376	24.347	22.92	23.3274	21.8798	0.421923	0.45571	-0.864735	FALSE	CG11073
FBtr0071800	24.4486	24.2694	25.2925	24.1718	26.2091	25.9127	24.712	26.7073	0.127033	0.693493	-1.33969	FALSE	CG2921
FBtr0303766;FBtr0071802	29.8811	29.718	29.8868	29.2852	29.8742	29.7748	30.5396	30.0997	0.331834	0.536596	-0.379324	FALSE	CG11474
FBtr0345871;FBtr0071804	21.8798	21.8798	21.8798	21.8798	21.8798	23.5854	21.8798	23.1537	0.334892	0.532657	-0.744893	FALSE	CG13501
FBtr0308774;FBtr0071812;FBtr0071811	24.0346	22.8821	22.1108	21.8798	22.2929	25.1108	21.8798	24.6263	0.525899	0.287828	-0.750622	FALSE	CG5819
FBtr0342985;FBtr0342986;FBtr0071815;FBtr0071814;FBtr0071813;FBtr0071816	26.2052	26.9767	26.7433	25.9189	23.5592	24.1082	25.445	25.9143	0.113799	0.706552	1.70436	FALSE	Gp150
FBtr0342988;FBtr0071820	21.8798	21.8798	21.8798	21.8798	21.8798	21.8798	21.8798	21.8798	0.421923	0	0	FALSE	Rtf1
FBtr0071821	21.8798	21.8798	21.8798	21.8798	21.8798	21.8798	21.8798	21.8798	0.421923	0	0	FALSE	wrapper
FBtr0342989;FBtr0071822	29.8514	29.9874	29.9178	29.5585	29.7116	29.7453	29.4283	29.1777	0.274499	0.576725	0.31304	FALSE	CG13506
FBtr0301243;FBtr0071827	21.8798	21.8798	21.8798	21.8798	21.8798	21.8798	21.8798	21.8798	0.421923	0	0	FALSE	Mes4
FBtr0344880;FBtr0339535;FBtr0071828	28.0867	28.2324	28.2145	29.1457	27.9251	27.5723	27.8233	26.3718	0.187478	0.640203	0.996686	FALSE	qkr58E-2
FBtr0071832	30.5228	30.6437	30.573	30.3256	30.7209	30.7982	30.6233	30.5783	0.266242	0.58205	-0.163891	FALSE	CG4752
FBtr0071833	26.7582	27.4332	27.3001	26.4256	21.8798	21.8798	21.8798	21.8798	2.0617e-05	0.929497	5.09952	TRUE	CG4554
FBtr0071834	24.3705	21.8798	23.6598	24.8016	21.8798	21.8798	21.8798	21.8798	0.11719	0.703202	1.79813	FALSE	CG4610
FBtr0071835	24.3119	23.3151	26.4638	25.0748	26.2977	25.7679	25.7705	26.2544	0.306469	0.556171	-1.23123	FALSE	CG6018
FBtr0071838;FBtr0331942;FBtr0112820	22.4308	24.7852	23.1938	24.5422	23.0193	22.2458	22.4498	23.9319	0.421923	0.418457	0.826251	FALSE	px
FBtr0071842	30.097	29.8753	30.0208	30.2931	29.1836	29.3836	29.5905	29.341	0.0100793	0.860991	0.696836	FALSE	mRpS29
FBtr0071843;FBtr0346637;FBtr0339537	27.0538	28.0327	28.351	28.9742	27.5174	26.4851	23.6741	21.8798	0.173449	0.651603	3.21383	FALSE	qkr58E-1
FBtr0339539;FBtr0071845	29.9043	28.9604	29.3258	29.5945	28.8714	28.9515	29.4404	29.0089	0.363745	0.509879	0.378176	FALSE	babos
FBtr0071848	29.4585	29.3944	28.8749	29.5556	30.0266	29.7913	29.7555	30.0847	0.0647239	0.760965	-0.593698	FALSE	T3dh
FBtr0342984;FBtr0071852;FBtr0071851;FBtr0071850;FBtr0071849	28.4291	27.8478	28.3122	29.2489	28.9342	28.4289	28.85	28.3887	0.636622	0.218969	-0.190953	FALSE	wdp
FBtr0343000;FBtr0343001;FBtr0071854	21.8798	21.8798	21.8798	21.8798	21.8798	24.3645	26.0361	24.1718	0.138001	0.682687	-2.23328	FALSE	CG4269
FBtr0343002;FBtr0071855	33.8324	33.4272	33.6656	33.7054	32.8392	33.1018	32.6377	32.822	0.00693351	0.872345	0.807519	FALSE	RpS16
FBtr0308602;FBtr0071856	21.8798	21.8798	21.8798	21.8798	21.8798	21.8798	21.8798	21.8798	0.421923	0	0	FALSE	Vps20
FBtr0071860	29.5822	29.2086	29.1556	29.8245	28.542	28.5998	28.5711	28.2566	0.0133166	0.850586	0.950346	FALSE	bonsai
FBtr0345496;FBtr0071861	21.8798	21.8798	21.8798	21.8798	21.8798	21.8798	21.8798	21.8798	0.421923	0	0	FALSE	nsr
FBtr0345498;FBtr0309799;FBtr0071862	21.8798	21.8798	21.8798	21.8798	21.8798	21.8798	21.8798	21.8798	0.421923	0	0	FALSE	CG13510
FBtr0071865;FBtr0309802	21.8798	22.8397	23.3997	21.8798	21.8798	21.8798	21.8798	21.8798	0.346644	0.522589	0.619966	FALSE	CG4250
FBtr0071883	37.3697	37.3293	37.4201	37.2538	37.6324	37.6871	37.7536	37.6936	0.00249675	0.895455	-0.348443	FALSE	blw
FBtr0071897	32.8574	32.8931	32.6561	33.0274	32.1865	32.1584	31.7346	32.0191	0.00634422	0.87492	0.83384	FALSE	RpL23
FBtr0071902;FBtr0332909	29.0352	28.9361	29.3595	29.3851	28.6393	28.8788	28.3339	28.7384	0.0746139	0.749478	0.53135	FALSE	asrij
FBtr0071903	22.6131	24.3981	24.012	21.8798	21.8798	21.8798	21.8798	21.8798	0.191607	0.637421	1.34597	FALSE	MED23
FBtr0071904	21.8798	21.8798	21.8798	21.8798	21.8798	21.8798	21.8798	21.8798	0.421923	0	0	FALSE	CG3700
FBtr0071905	28.3649	28.4201	28.3302	28.6966	28.2827	26.3809	28.2347	27.9351	0.352549	0.518234	0.744566	FALSE	Gmer
FBtr0071906;FBtr0332910;FBtr0304924	29.7039	30.1166	29.7696	29.6135	29.3319	29.5334	29.6495	29.752	0.347458	0.521988	0.234206	FALSE	CG3499
FBtr0071907	29.4472	29.4265	29.3285	29.3602	28.8729	28.8254	28.627	29.0873	0.0124998	0.853363	0.537481	FALSE	CG3501
FBtr0071909;FBtr0305132	29.1448	29.3553	29.3633	28.6319	29.3315	29.6176	29.5415	29.6748	0.201131	0.629571	-0.417522	FALSE	inaD
FBtr0343182;FBtr0071910	21.8798	21.8798	21.8798	21.8798	21.8798	21.8798	21.8798	21.8798	0.421923	0	0	FALSE	CG13531
FBtr0071913;FBtr0309858;FBtr0071911;FBtr0071914	21.8798	23.4703	24.7282	25.7352	21.8798	21.8798	21.8798	21.8798	0.154615	0.667105	2.07359	FALSE	CycB
FBtr0343013;FBtr0071922	21.8798	21.8798	21.8798	21.8798	21.8798	21.8798	21.8798	21.8798	0.421923	0	0	FALSE	robo
FBtr0343014;FBtr0071924;FBtr0330249	21.8798	21.8798	21.8798	21.8798	21.8798	21.8798	21.8798	21.8798	0.421923	0	0	FALSE	Ppa
FBtr0071927	21.8798	21.8798	21.8798	21.8798	21.8798	21.8798	21.8798	21.8798	0.421923	0	0	FALSE	CG30196
FBtr0071928	21.8798	21.8798	21.8798	21.8798	24.9068	23.2872	21.8798	25.3458	0.154872	0.666793	-1.97513	FALSE	Cyp6d2
FBtr0345504;FBtr0071933	33.6106	33.6654	33.1498	34.5687	32.2241	32.4486	33.1315	32.6268	0.0788358	0.744688	1.14088	FALSE	CG2852
FBtr0345505;FBtr0071934	25.7816	25.7194	25.9128	23.4362	27.0462	25.1078	26.1055	25.6972	0.421923	0.377036	-0.776691	FALSE	Ugt58Fa
FBtr0071935	32.9572	32.5912	32.4807	32.9583	31.9556	31.6973	31.7583	31.7633	0.00454793	0.883095	0.953218	FALSE	RpS24
FBtr0071937	23.8162	23.9237	24.9521	24.7977	21.8798	21.8798	21.8798	21.8798	0.00202168	0.898985	2.49268	TRUE	Cdk9
FBtr0071943;FBtr0071942	21.8798	25.5502	24.9235	23.1398	21.8798	21.8798	21.8798	23.5563	0.339539	0.529147	1.57443	FALSE	nahoda
FBtr0302895;FBtr0071951	21.8798	21.8798	21.8798	21.8798	21.8798	21.8798	21.8798	21.8798	0.421923	0	0	FALSE	CG9849
FBtr0345653;FBtr0100130;FBtr0071953	21.8798	21.8798	21.8798	21.8798	21.8798	21.8798	21.8798	21.8798	0.421923	0	0	FALSE	twi
FBtr0343192;FBtr0343191;FBtr0343190;FBtr0071961;FBtr0343189;FBtr0343188;FBtr0071960;FBtr0071959;FBtr0071958	30.2741	30.1553	30.39	29.1074	30.5957	30.5892	30.68	30.5139	0.23677	0.602423	-0.613024	FALSE	l(2)k09913
FBtr0310344;FBtr0071963	21.8798	21.8798	21.8798	21.8798	27.3954	26.8154	26.3095	27.3294	3.11495e-05	0.928521	-5.08267	TRUE	CG3085
FBtr0071968	21.8798	21.8798	21.8798	21.8798	21.8798	26.7153	24.7108	26.5258	0.122427	0.698007	-3.07812	FALSE	Klp59D
FBtr0071982	32.2557	32.1289	32.0172	32.5965	30.1061	29.9662	29.6169	29.6956	0.000177784	0.921707	2.40334	TRUE	Fib
FBtr0071984	24.4177	23.6965	22.7357	21.8798	21.8798	21.8798	21.8798	21.8798	0.178243	0.647611	1.30264	FALSE	CG9890
FBtr0336732;FBtr0071985	26.3188	26.5679	23.5074	27.9455	26.8488	27.1107	27.2516	26.6728	0.449104	0.336045	-0.886025	FALSE	l(2)06496
FBtr0071988	25.5484	25.3595	22.6984	26.1192	25.6552	25.3256	21.8798	21.8798	0.438695	0.342597	1.24629	FALSE	CG9896
FBtr0071989	31.3854	31.0953	31.2274	29.1891	21.8798	21.8798	21.8798	21.8798	6.87754e-05	0.926037	8.84453	TRUE	CG9897
FBtr0071990	21.8798	21.8798	21.8798	21.8798	27.2656	27.1317	26.9877	27.1527	2.51062e-08	0.935084	-5.25466	TRUE	CG32833
FBtr0303464;FBtr0071994	31.1205	30.4175	30.7399	32.5212	29.3894	29.6927	30.2049	29.8981	0.11209	0.708403	1.4035	FALSE	CG3800
FBtr0303465;FBtr0071995	21.8798	21.8798	21.8798	21.8798	27.1036	27.4812	27.688	27.6041	6.66728e-07	0.933922	-5.58944	TRUE	CG3788
FBtr0071996	27.2043	26.64	24.1965	27.9609	21.8798	21.8798	21.8798	21.8798	0.0107266	0.858821	4.62064	FALSE	Nup214
FBtr0301853;FBtr0072006	21.8798	21.8798	21.8798	21.8798	21.8798	21.8798	23.9657	21.8798	0.421923	0.353553	-0.521483	FALSE	CG9875
FBtr0072011	29.4516	30.4062	29.9078	25.9984	21.8798	21.8798	21.8798	21.8798	0.00443127	0.883748	7.06123	TRUE	yellow-d
FBtr0072012	21.8798	21.8798	21.8798	21.8798	24.5361	21.8798	24.1028	21.8798	0.331716	0.537245	-1.21983	FALSE	yellow-d2
FBtr0302315;FBtr0072015;FBtr0072013;FBtr0072014	26.3899	26.3602	25.208	24.001	26.5441	23.3239	23.3008	21.8798	0.393019	0.49266	1.72766	FALSE	eIF2B-delta
FBtr0343207;FBtr0072025	21.8798	21.8798	22.4907	23.2565	21.8798	21.8798	21.8798	21.8798	0.391911	0.493428	0.496906	FALSE	CG9812
FBtr0072027	25.3871	24.9602	26.5267	25.6442	24.5645	21.8798	21.8798	21.8798	0.0351295	0.803772	3.07858	FALSE	CG3520
FBtr0112940;FBtr0072028;FBtr0072029	23.6291	23.5007	21.8798	21.8798	21.8798	21.8798	21.8798	21.8798	0.331486	0.53954	0.842565	FALSE	CG3530
FBtr0072031;FBtr0072030	34.1371	33.0988	33.3661	33.7523	34.1839	34.2193	34.6296	34.2007	0.108772	0.711409	-0.719811	FALSE	CG30415
FBtr0072034;FBtr0072033	31.5471	31.3415	31.1306	32.2965	31.8024	31.2675	32.1429	31.2488	0.933462	0.0416172	-0.0364787	FALSE	CG13551
FBtr0072036	25.7908	25.0165	21.8798	26.9232	21.8798	24.6939	23.7296	21.8798	0.421923	0.474304	1.85684	FALSE	Golgin245
FBtr0072037	21.8798	21.8798	21.8798	21.8798	21.8798	24.7213	21.8798	21.8798	0.421923	0.353553	-0.71037	FALSE	vir
FBtr0329860;FBtr0072038	24.3292	23.318	24.2598	24.1372	23.938	24.2787	23.2428	21.8798	0.421923	0.4019	0.676222	FALSE	CG3500
FBtr0072040	21.8798	21.8798	21.8798	21.8798	21.8798	21.8798	21.8798	21.8798	0.421923	0	0	FALSE	CG30413
FBtr0072043;FBtr0072044;FBtr0343206	21.8798	21.8798	21.8798	21.8798	21.8798	21.8798	21.8798	21.8798	0.421923	0	0	FALSE	CG30412
FBtr0072049	21.8798	21.8798	21.8798	21.8798	26.7666	26.6628	24.5359	26.342	0.00258359	0.894879	-4.19704	TRUE	RpL22-like
FBtr0072058	21.8798	21.8798	21.8798	21.8798	21.8798	21.8798	21.8798	21.8798	0.421923	0	0	FALSE	mi
FBtr0072060	29.2235	29.4179	29.162	29.4946	28.3002	28.6912	27.2466	27.9808	0.0378607	0.798728	1.2698	FALSE	CG30185
FBtr0343265;FBtr0072061	33.9572	33.7825	34.2899	34.0074	33.7959	34.2175	33.6232	33.8151	0.474043	0.320191	0.146372	FALSE	levy
FBtr0072062	25.6948	24.7427	24.7377	24.6298	21.8798	21.8798	21.8798	21.8798	0.000360462	0.917471	3.07149	TRUE	Dcp-1
FBtr0072064	21.8798	21.8798	21.8798	21.8798	21.8798	21.8798	21.8798	21.8798	0.421923	0	0	FALSE	Pi3K59F
FBtr0072070;FBtr0072069;FBtr0072067;FBtr0072066;FBtr0332926;FBtr0072068	21.8798	21.8798	21.8798	21.8798	21.8798	21.8798	21.8798	21.8798	0.421923	0	0	FALSE	apt
FBtr0340029;FBtr0072072;FBtr0072073;FBtr0340030;FBtr0340031	21.8798	21.8798	21.8798	21.8798	21.8798	21.8798	21.8798	21.8798	0.421923	0	0	FALSE	retn
FBtr0072084	29.6114	29.1459	29.3771	29.8725	27.0921	28.4054	27.2502	27.1433	0.00979929	0.861898	2.02894	TRUE	mRpL43
FBtr0072085	21.8798	21.8798	21.8798	21.8798	21.8798	21.8798	21.8798	21.8798	0.421923	0	0	FALSE	l(2)dtl
FBtr0343268;FBtr0113114;FBtr0113113;FBtr0072087	21.8798	23.1779	21.8798	21.8798	21.8798	21.8798	21.8798	21.8798	0.421923	0.353553	0.324535	FALSE	Sesn
FBtr0345535;FBtr0072091	23.832	24.7813	21.8798	22.885	26.0315	23.8818	23.8434	23.6754	0.421923	0.414325	-1.01348	FALSE	CG5532
FBtr0072095	25.3778	25.7882	24.0502	24.7566	21.8798	21.8798	21.8798	21.8798	0.00236032	0.896381	3.11342	TRUE	l(2)not
FBtr0072098;FBtr0072096;FBtr0072097	21.8798	21.8798	21.8798	21.8798	21.8798	21.8798	21.8798	21.8798	0.421923	0	0	FALSE	CG4091
FBtr0336685;FBtr0072100	32.4405	32.3895	32.3491	33.1536	32.3858	32.3004	32.717	32.5543	0.724153	0.166108	0.0938064	FALSE	l(2)efl
FBtr0072104;FBtr0072103;FBtr0072102;FBtr0072105;FBtr0306384;FBtr0336929	27.6299	28.2641	28.3791	21.8798	29.5469	28.7816	29.2608	28.9786	0.344998	0.524337	-2.60378	FALSE	CG4019
FBtr0343267;FBtr0072111	27.3719	27.7839	27.7711	27.6372	21.8798	24.18	22.5272	23.7695	0.00216637	0.89784	4.5519	TRUE	Rrp4
FBtr0072112;FBtr0072113	21.8798	21.8798	21.8798	21.8798	21.8798	21.8798	21.8798	21.8798	0.421923	0	0	FALSE	pita
FBtr0113112;FBtr0072114	28.8677	28.8494	28.5996	29.2021	21.8798	25.3719	21.8798	21.8798	0.00471685	0.882206	6.1269	TRUE	wmd
FBtr0072120	21.8798	21.8798	21.8798	21.8798	21.8798	21.8798	21.8798	21.8798	0.421923	0	0	FALSE	RabX1
FBtr0072121	24.5688	24.539	23.9523	24.7497	21.8798	21.8798	25.0354	25.1375	0.421923	0.362299	0.969321	FALSE	CG3906
FBtr0072124	23.7295	23.2638	22.6365	21.8798	21.8798	21.8798	21.8798	21.8798	0.154963	0.666637	0.997613	FALSE	CG5543
FBtr0072126;FBtr0343273	30.6045	30.4505	30.6944	30.7808	30.3757	29.8555	30.1788	30.0831	0.0402076	0.794787	0.509326	FALSE	CG5554
FBtr0343274;FBtr0072127	21.8798	21.8798	21.8798	21.8798	21.8798	21.8798	21.8798	21.8798	0.421923	0	0	FALSE	gbb
FBtr0072128	27.4184	23.1154	27.7135	25.0742	27.5468	27.7586	27.9499	27.9673	0.303704	0.557995	-1.97533	FALSE	CG5569
FBtr0072130;FBtr0330600	27.3631	27.9293	27.8647	21.8798	28.6674	28.4504	28.612	28.0218	0.407339	0.483636	-2.17873	FALSE	TM4SF
FBtr0072131	32.1892	31.6323	31.524	32.1754	30.8214	31.2016	32.7123	31.9281	0.704745	0.177429	0.214404	FALSE	CG5597
FBtr0072132	26.7159	27.8218	27.3473	27.4017	21.8798	21.8798	21.8798	21.8798	1.26251e-05	0.930525	5.4419	TRUE	DNA-ligI
FBtr0343298;FBtr0072134	21.8798	24.1784	21.8798	21.8798	21.8798	21.8798	21.8798	21.8798	0.421923	0.353553	0.574649	FALSE	Lpt
FBtr0072140	21.8798	21.8798	21.8798	21.8798	21.8798	21.8798	21.8798	21.8798	0.421923	0	0	FALSE	CG2812
FBtr0072141	32.8558	32.7539	32.7312	32.1447	33.2138	33.6476	33.4839	33.7585	0.0247462	0.822542	-0.904562	FALSE	Tal
FBtr0343279;FBtr0072144;FBtr0072142;FBtr0301411;FBtr0072143	28.8645	28.5571	28.9894	27.8201	29.2607	29.4788	28.9626	29.3598	0.154963	0.666605	-0.707684	FALSE	Galphas
FBtr0331980;FBtr0072145	30.2349	30.1092	30.2635	30.4978	29.947	29.6052	29.9747	29.8559	0.0510001	0.779156	0.430661	FALSE	CG2970
FBtr0072147	23.5398	25.7899	24.0786	23.0362	21.8798	21.8798	21.8798	21.8798	0.0494787	0.781699	2.23137	FALSE	thoc5
FBtr0072150	23.3222	24.1464	25.9596	21.8798	23.3325	27.1025	26.4237	26.3961	0.344998	0.524384	-1.9867	FALSE	Fmo-1
FBtr0072151	27.1127	26.5281	26.5718	26.2516	27.7172	28.4353	27.3367	27.7603	0.0351586	0.803687	-1.19634	FALSE	Alas
FBtr0072152	21.8798	22.9468	21.8798	21.8798	21.8798	21.8798	21.8798	21.8798	0.421923	0.353553	0.266749	FALSE	or
FBtr0072156	21.8798	21.8798	21.8798	21.8798	21.8798	21.8798	21.8798	21.8798	0.421923	0	0	FALSE	mr
FBtr0343282;FBtr0072158;FBtr0072157	21.8798	21.8798	21.8798	21.8798	21.8798	21.8798	21.8798	21.8798	0.421923	0	0	FALSE	Sox14
FBtr0072161	21.8798	21.8798	21.8798	21.8798	24.4027	23.8138	23.8576	23.8221	0.000152732	0.922564	-2.09428	TRUE	CG3121
FBtr0072163	32.6493	32.1578	32.3752	33.006	32.3925	32.6089	32.6676	32.5019	0.985845	0.00860833	0.00434772	FALSE	Adk2
FBtr0343341;FBtr0343340;FBtr0072164	31.0854	31.706	31.3782	33.0695	32.6433	32.1294	33.0462	32.5878	0.34469	0.524744	-0.791887	FALSE	PebIII
FBtr0072165	22.8526	24.7753	21.8798	22.3661	21.8798	25.7954	21.8798	23.6718	0.812286	0.113826	-0.338252	FALSE	CG3163
FBtr0345949;FBtr0072167;FBtr0072166	21.8798	24.9148	21.8798	24.6153	21.8798	21.8798	21.8798	21.8798	0.331486	0.539094	1.44263	FALSE	MAN1
FBtr0072168	23.2996	24.2931	25.5048	21.8798	21.8798	21.8798	21.8798	21.8798	0.164762	0.658558	1.86453	FALSE	IntS1
FBtr0072173;FBtr0072172	32.922	32.8851	32.566	33.7964	31.9736	31.8973	31.6232	31.8744	0.0278932	0.816105	1.20026	FALSE	eIF-5A
FBtr0072176;FBtr0072175;FBtr0072174	32.5716	32.5164	32.3085	32.8449	31.259	31.5753	31.3788	31.5068	0.00189359	0.899955	1.13036	FALSE	RpL12
FBtr0072177;FBtr0343335;FBtr0343334	27.254	27.5763	27.361	26.6439	22.508	27.5577	26.8383	27.6644	0.490838	0.30964	1.06668	FALSE	Rap2l
FBtr0072179;FBtr0343336;FBtr0343337;FBtr0302165	24.0209	23.7901	27.5079	24.4621	22.7384	27.5627	22.2854	21.8798	0.501455	0.303	1.3287	FALSE	CG3209
FBtr0072185	23.6072	25.0274	24.7484	25.024	23.1844	22.952	25.1026	23.883	0.421923	0.462449	0.821267	FALSE	RpL39
FBtr0072187	28.7005	29.0073	28.9849	28.768	28.8556	28.7236	28.6915	28.9312	0.586627	0.249846	0.0647044	FALSE	gammaSnap1
FBtr0072188	34.0276	33.9778	33.7539	34.2664	33.5697	33.4499	33.7703	33.6497	0.0824181	0.740666	0.396562	FALSE	tsr
FBtr0343345;FBtr0072189;FBtr0072190	21.8798	21.8798	21.8798	21.8798	21.8798	21.8798	21.8798	21.8798	0.421923	0	0	FALSE	Not11
FBtr0072191;FBtr0072192	26.1774	23.3011	21.8798	23.3924	21.8798	21.8798	21.8798	21.8798	0.249027	0.593455	1.80791	FALSE	Chi
FBtr0345934;FBtr0072193	21.8798	21.8798	21.8798	21.8798	21.8798	21.8798	21.8798	21.8798	0.421923	0	0	FALSE	CG30172
FBtr0343346;FBtr0072194	26.2424	26.6863	26.284	25.9151	22.813	25.3114	21.8798	25.7833	0.164736	0.658619	2.33511	FALSE	HSPC300
FBtr0072201;FBtr0343288	27.3129	27.0758	27.2025	26.9557	27.2172	27.1747	27.3465	27.439	0.359801	0.512608	-0.157618	FALSE	CG3860
FBtr0072203;FBtr0072202	27.4995	27.3651	26.6517	28.1492	27.8392	28.1675	28.9834	28.2688	0.18728	0.640531	-0.898365	FALSE	Phm
FBtr0072207	26.6012	23.771	23.5292	24.3699	27.5698	26.9143	24.1057	23.0949	0.595491	0.244424	-0.853376	FALSE	CG16787
FBtr0072208	23.9106	25.0998	23.7758	21.8798	21.8798	24.2096	24.1979	23.2285	0.791491	0.125996	0.287544	FALSE	CG3803
FBtr0072209	26.2051	23.0939	26.088	26.3313	22.4008	26.6486	21.8798	21.8798	0.362362	0.511038	2.22731	FALSE	CG13565
FBtr0343280;FBtr0072210	21.8798	21.8798	21.8798	21.8798	21.8798	21.8798	21.8798	21.8798	0.421923	0	0	FALSE	CG3735
FBtr0072218;FBtr0072217;FBtr0072216;FBtr0072214;FBtr0072213;FBtr0072212;FBtr0072211	21.8798	21.8798	21.8798	21.8798	21.8798	21.8798	21.8798	21.8798	0.421923	0	0	FALSE	Ca-P60A
FBtr0072215	31.1247	32.0015	32.3822	30.2888	32.9489	33.2945	33.222	33.0918	0.0570293	0.77097	-1.69001	FALSE	Ca-P60A
FBtr0305990;FBtr0305989;FBtr0072219	32.8382	32.8945	32.9162	33.1314	31.1127	30.8436	30.8641	31.1099	3.17941e-05	0.928446	1.96251	FALSE	Nap1
FBtr0072220	22.8528	23.8496	23.0052	24.0494	21.8798	23.2687	24.6379	23.6025	0.912258	0.0545423	0.0920124	FALSE	CG5339
FBtr0343302;FBtr0072221	21.8798	21.8798	21.8798	21.8798	21.8798	21.8798	21.8798	21.8798	0.421923	0	0	FALSE	Upf3
FBtr0301648;FBtr0072223	28.1502	27.7019	27.8257	29.2208	25.5839	21.8798	24.9283	23.0686	0.0205217	0.831525	4.35948	FALSE	DCP1
FBtr0343290;FBtr0072225	29.6472	29.1191	29.4179	29.7263	28.5026	28.7417	28.899	28.8118	0.023236	0.825671	0.738842	FALSE	CG4882
FBtr0072226	33.5407	33.4739	33.4038	33.104	33.5726	33.7662	33.6785	33.8238	0.100097	0.722136	-0.3297	FALSE	Thiolase
FBtr0343277;FBtr0343276;FBtr0343275;FBtr0072227	21.8798	24.3727	23.7029	23.6639	21.8798	21.8798	21.8798	21.8798	0.110082	0.71017	1.52505	FALSE	CG4585
FBtr0072233	23.0396	22.7211	23.8366	22.8161	21.8798	21.8798	21.8798	21.8798	0.0194862	0.834229	1.22356	FALSE	Pym
FBtr0343278;FBtr0072234	25.2175	22.7872	24.0543	23.6228	25.1164	24.245	23.5241	23.6991	0.772656	0.137541	-0.225706	FALSE	ytr
FBtr0072235	29.0703	28.9137	28.8825	28.8961	27.2138	25.8715	24.8285	21.8798	0.0594487	0.767788	3.99225	FALSE	eIF6
FBtr0072236	21.8798	21.8798	21.8798	22.8481	21.8798	21.8798	23.0705	23.375	0.455159	0.33233	-0.429428	FALSE	Snap29
FBtr0072237	26.1958	21.8798	21.8798	26.1763	21.8798	21.8798	21.8798	21.8798	0.331486	0.54006	2.15316	FALSE	shu
FBtr0072241;FBtr0343270	25.0619	24.1841	21.8798	25.4073	21.8798	21.8798	21.8798	21.8798	0.112221	0.708125	2.25351	FALSE	Nxt1
FBtr0072242	27.8852	27.7627	27.7373	28.1479	21.8798	21.8798	21.8798	21.8798	1.15458e-07	0.934728	6.0035	TRUE	Ssrp
FBtr0072249;FBtr0307174	21.8798	21.8798	21.8798	23.4351	21.8798	21.8798	21.8798	21.8798	0.421923	0.353553	0.388836	FALSE	snama
FBtr0343339;FBtr0072250	21.8798	21.8798	21.8798	21.8798	21.8798	21.8798	21.8798	21.8798	0.421923	0	0	FALSE	enok
FBtr0343432;FBtr0072253	23.2474	24.3123	23.8227	24.2001	21.8798	21.8798	21.8798	21.8798	0.00215028	0.897978	2.01587	TRUE	Zfrp8
FBtr0072255;FBtr0072254	30.0932	30.1992	30.0646	29.7639	30.5647	30.5508	30.0544	30.5628	0.144001	0.676565	-0.40295	FALSE	Dat
FBtr0072256	27.6947	27.2437	27.0135	28.8189	24.6037	22.9182	23.6746	23.2667	0.00342282	0.889517	4.0769	TRUE	spag
FBtr0343435;FBtr0343434;FBtr0072257	21.8798	21.8798	21.8798	21.8798	24.216	24.7433	21.8798	21.8798	0.331866	0.536397	-1.29992	FALSE	CG3328
FBtr0300861;FBtr0300227;FBtr0100213;FBtr0072258;FBtr0304599	30.5709	30.6655	31.141	30.0508	29.2562	28.8105	28.7213	28.1405	0.00948781	0.862961	1.8749	FALSE	Nop60B
FBtr0072261	28.892	28.5683	28.2866	29.6449	27.8323	28.1377	28.4192	28.1698	0.200053	0.630626	0.708216	FALSE	cN-IIIB
FBtr0072262	26.1935	26.1975	23.2559	24.0658	26.1217	27.4971	26.344	25.8361	0.302338	0.558797	-1.52156	FALSE	CG3356
FBtr0072265;FBtr0343442;FBtr0072266;FBtr0308245	21.8798	24.2696	23.1343	25.0275	21.8798	21.8798	21.8798	21.8798	0.157504	0.66451	1.69804	FALSE	CG3376
FBtr0072268;FBtr0072269	21.8798	22.506	21.8798	24.2981	25.0106	24.1766	24.0669	23.22	0.211808	0.621261	-1.47758	FALSE	CG3394
FBtr0072270	24.1809	23.8389	23.3651	24.0641	24.2054	23.9179	23.18	21.8798	0.421923	0.362876	0.566478	FALSE	betaTub60D
FBtr0290089;FBtr0343314;FBtr0072271	21.8798	21.8798	21.8798	21.8798	21.8798	21.8798	23.7534	23.4286	0.331834	0.536849	-0.855604	FALSE	bs
FBtr0072277	29.5292	29.1816	29.2628	30.0384	28.8341	28.9802	28.774	28.4825	0.0699457	0.754841	0.735319	FALSE	mRpS17
FBtr0100398;FBtr0072280	26.3704	23.7664	21.8798	24.6403	25.2009	21.8798	21.8798	21.8798	0.421923	0.401359	1.45417	FALSE	CG4065
FBtr0343438;FBtr0072282;FBtr0072281	21.8798	21.8798	21.8798	21.8798	21.8798	21.8798	21.8798	21.8798	0.421923	0	0	FALSE	tamo
FBtr0072285	21.8798	23.1581	24.4106	23.5878	21.8798	21.8798	21.8798	21.8798	0.138207	0.682292	1.3793	FALSE	CG4049
FBtr0072287	23.6455	23.1007	25.1048	23.8246	24.009	23.3597	21.8798	24.6099	0.61517	0.23214	0.454318	FALSE	gek
FBtr0332921;FBtr0072290;FBtr0330237	31.3321	31.8238	31.5958	32.6238	31.5427	31.3361	30.654	30.6636	0.206334	0.625414	0.794779	FALSE	Rpn8
FBtr0072293	21.8798	21.8798	21.8798	21.8798	26.8684	27.1003	27.3043	27.2734	2.69356e-07	0.9344	-5.25682	TRUE	CG3483
FBtr0072296;FBtr0072295	21.8798	21.8798	21.8798	21.8798	21.8798	21.8798	22.9229	24.2988	0.395326	0.490849	-0.865527	FALSE	CG3494
FBtr0072297	21.8798	21.8798	24.226	21.8798	21.8798	21.8798	21.8798	21.8798	0.421923	0.353553	0.586555	FALSE	CG16837
FBtr0072307	27.3738	26.4523	27.3734	27.9972	25.0903	25.9966	25.6642	27.1995	0.170045	0.654175	1.31155	FALSE	CG11414
FBtr0072308	24.1036	22.6355	22.8691	23.2419	23.2773	25.3637	23.9011	24.0475	0.331718	0.537158	-0.934899	FALSE	uri
FBtr0343484;FBtr0072309	24.2818	26.2127	26.5028	28.5285	21.8798	21.8798	21.8798	21.8798	0.0149536	0.845647	4.5017	FALSE	CG3511
FBtr0343486;FBtr0301502;FBtr0072312	21.8798	21.8798	21.8798	21.8798	21.8798	21.8798	21.8798	21.8798	0.421923	0	0	FALSE	pio
FBtr0072315	21.8798	21.8798	21.8798	21.8798	23.5897	21.8798	21.8798	21.8798	0.421923	0.353553	-0.427475	FALSE	CG3548
FBtr0072317	21.8798	21.8798	21.8798	21.8798	21.8798	21.8798	21.8798	21.8798	0.421923	0	0	FALSE	CG3570
FBtr0343487;FBtr0072320	21.8798	21.8798	21.8798	21.8798	23.757	26.2894	24.157	23.0827	0.0591704	0.768273	-2.44176	FALSE	CG3608
FBtr0072321	21.8798	21.8798	21.8798	21.8798	21.8798	24.2588	22.7085	24.1928	0.175219	0.65014	-1.38018	FALSE	Cyp9c1
FBtr0072322	21.8798	21.8798	21.8798	21.8798	27.1855	26.9755	26.5999	27.596	9.87054e-06	0.930979	-5.20944	TRUE	CG3640
FBtr0072323	29.9629	29.8542	29.49	30.1298	29.3969	29.7395	29.9602	30.5703	0.87338	0.0777172	-0.0574869	FALSE	CG3663
FBtr0301036;FBtr0072326;FBtr0072325;FBtr0072324	32.6591	32.8137	32.7708	33.5662	32.7908	32.3833	33.0319	32.745	0.485694	0.313209	0.214675	FALSE	NDUFA8
FBtr0306655;FBtr0072328;FBtr0072327	21.8798	21.8798	21.8798	21.8798	23.7387	23.7301	21.8798	21.8798	0.331486	0.54006	-0.927307	FALSE	Pof
FBtr0072332	24.0521	24.5383	21.8798	23.1353	21.8798	21.8798	21.8798	21.8798	0.139339	0.68116	1.52161	FALSE	CG4806
FBtr0343491;FBtr0072334	21.8798	21.8798	21.8798	25.388	22.8429	24.8859	22.795	24.5454	0.433818	0.345959	-1.01048	FALSE	Cpr60D
FBtr0072335	21.8798	21.8798	21.8798	21.8798	21.8798	21.8798	21.8798	21.8798	0.421923	0	0	FALSE	CG4781
FBtr0072340;FBtr0072339	34.06	34.2647	34.48	33.4511	34.7128	34.7405	34.7218	34.7245	0.0995844	0.722867	-0.660971	FALSE	CG4692
FBtr0343489;FBtr0072342	23.3833	24.0714	22.8081	21.8797	21.8798	21.8798	21.8798	21.8798	0.154615	0.667107	1.15586	FALSE	Fcp1
FBtr0072343	21.8798	22.9129	23.3881	23.1718	24.1304	23.8728	24.6141	21.8798	0.421923	0.395469	-0.786106	FALSE	Nurf-38
FBtr0300490;FBtr0072344	21.8798	21.8798	21.8798	21.8798	21.8798	21.8798	21.8798	21.8798	0.421923	0	0	FALSE	CG4622
FBtr0306137;FBtr0072346	28.3356	27.8593	28.0962	28.2975	27.2124	23.3808	21.8798	23.3098	0.0521692	0.777431	4.20149	FALSE	CG4612
FBtr0072349;FBtr0072348;FBtr0072347	30.0467	30.1609	30.1309	30.384	30.3055	30.2899	30.1836	30.1257	0.663232	0.202546	-0.0455662	FALSE	Letm1
FBtr0343481;FBtr0072350	23.3519	23.2122	21.8798	23.582	21.8798	23.3668	22.848	23.7692	0.956185	0.0276337	0.0405338	FALSE	Prosalpha4T2
FBtr0072351	21.8798	21.8798	21.8798	21.8798	22.2497	23.7363	21.8798	21.8798	0.421923	0.427699	-0.556601	FALSE	Ssl
FBtr0072355	21.8798	21.8798	21.8798	23.5592	21.8798	21.8798	21.8798	21.8798	0.421923	0.353553	0.41985	FALSE	CG4563
FBtr0290019;FBtr0072366;FBtr0072364;FBtr0072363;FBtr0100470;FBtr0332925	28.1793	28.1564	27.7569	28.6122	27.3677	23.6014	24.6256	25.5835	0.059705	0.7675	2.88165	FALSE	slik
FBtr0072369;FBtr0343495;FBtr0343494	23.7261	23.7339	21.8798	21.8798	23.289	25.146	21.8798	23.4993	0.544079	0.276443	-0.64866	FALSE	CG30421
FBtr0072370	21.8798	21.8798	21.8798	21.8798	21.8798	21.8798	21.8798	21.8798	0.421923	0	0	FALSE	spz6
FBtr0072375	23.9754	21.8798	21.8798	21.8798	21.8798	24.146	21.8798	21.8798	0.965728	0.021104	-0.0426546	FALSE	CG3589
FBtr0072392	21.8798	21.8798	21.8798	24.0941	21.8798	21.8798	21.8798	21.8798	0.421923	0.353553	0.553577	FALSE	CG3760
FBtr0343504;FBtr0072395	27.9113	28.1105	27.7895	28.7926	22.2045	27.3258	27.8758	27.0081	0.38524	0.497487	2.04744	FALSE	CG3776
FBtr0343506;FBtr0072396	21.8798	21.8798	21.8798	21.8798	21.8798	21.8798	21.8798	24.4603	0.421923	0.353553	-0.645133	FALSE	CG3829
FBtr0345678;FBtr0072397	29.3041	29.2201	28.8666	29.2974	29.2495	29.3428	29.2311	28.8007	0.938576	0.0383417	0.0160005	FALSE	uzip
FBtr0343507;FBtr0072402;FBtr0072400;FBtr0072401;FBtr0343508	29.2184	29.2572	29.8382	28.831	30.1823	30.383	29.8032	29.9496	0.0763845	0.747348	-0.793337	FALSE	emp
FBtr0072403	27.6824	27.6747	27.0124	26.8143	27.6647	27.6986	27.2332	27.5237	0.449134	0.335991	-0.234077	FALSE	CG2736
FBtr0343510;FBtr0343509;FBtr0072404	21.8798	21.8798	21.8798	21.8798	21.8798	21.8798	21.8798	21.8798	0.421923	0	0	FALSE	Phk-3
FBtr0072406;FBtr0072405	33.0366	33.3123	33.1434	33.9622	32.45	31.9889	32.0938	31.8849	0.0145719	0.846906	1.25925	FALSE	RpL19
FBtr0072409	21.8798	21.8798	21.8798	21.8798	21.8798	21.8798	21.8798	21.8798	0.421923	0	0	FALSE	CG2790
FBtr0072411	30.6091	30.5673	29.8987	30.8657	30.0718	30.2203	30.0804	30.1294	0.33159	0.537551	0.359712	FALSE	Tina-1
FBtr0072412;FBtr0345515;FBtr0309243	23.7528	24.721	27.1614	27.9899	23.9996	23.3771	23.6216	22.8547	0.173317	0.65178	2.44306	FALSE	CG2811
FBtr0309244;FBtr0072413	21.8798	21.8798	21.8798	21.8798	21.8798	23.415	24.1992	27.0848	0.233805	0.60447	-2.26489	FALSE	CG30427
FBtr0300957;FBtr0300956;FBtr0072414	21.8798	21.8798	21.8798	21.8798	26.7768	27.7323	26.8522	26.9028	1.45541e-05	0.930242	-5.18624	TRUE	CG30427
FBtr0072417	27.9233	28.2569	28.2387	25.9083	28.9856	27.9883	26.9652	27.8639	0.671759	0.197164	-0.368952	FALSE	pain
FBtr0072420	21.8798	21.8798	21.8798	21.8798	24.3349	23.5884	23.9307	27.3376	0.0669132	0.758379	-2.91814	FALSE	Ance-5
FBtr0072423	21.8798	21.8798	21.8798	21.8798	21.8798	21.8798	21.8798	21.8798	0.421923	0	0	FALSE	CG16896
FBtr0072425	23.993	21.8798	23.6227	21.8798	21.8798	21.8798	21.8798	21.8798	0.331834	0.536771	0.964031	FALSE	Orc4
FBtr0072427	24.6486	21.8798	21.8798	24.4199	21.8798	21.8798	21.8798	21.8798	0.331486	0.539395	1.32726	FALSE	Reg-5
FBtr0072429	28.9246	28.9625	29.0111	28.5646	28.8437	28.8288	28.3228	28.8312	0.434955	0.345132	0.159089	FALSE	Aats-tyr-m
FBtr0072430	21.8798	21.8798	21.8798	21.8798	22.6382	27.3577	27.3479	22.5821	0.194825	0.635134	-3.10169	FALSE	Lcp9
FBtr0072433;FBtr0072434;FBtr0072435;FBtr0308684	29.4666	29.9404	29.3929	29.0507	29.6158	29.6954	29.2475	29.3485	0.959362	0.0254625	-0.014136	FALSE	Eps-15
FBtr0343496;FBtr0305310;FBtr0305309;FBtr0072436	33.8915	33.9548	33.7607	33.608	33.867	34.2611	33.953	34.0777	0.238897	0.6009	-0.235968	FALSE	GstE12
FBtr0310371;FBtr0072437	25.9829	21.8798	21.8798	26.8449	23.2103	22.1016	25.1367	23.5679	0.725834	0.165228	0.642706	FALSE	CG12848
FBtr0333174;FBtr0072454	30.1969	26.4886	24.7544	25.2193	35.3466	34.948	35.1219	34.5682	0.00551012	0.878501	-8.33136	TRUE	Peb
FBtr0345580;FBtr0072455	29.4937	28.7196	28.3946	26.2241	33.8774	34.0253	34.3481	34.0639	0.00225177	0.89717	-5.87067	TRUE	PebII
FBtr0072463	28.5905	28.3209	28.1694	28.0309	31.1457	29.4237	29.1497	28.4161	0.221876	0.613471	-1.25586	FALSE	Lsp1gamma
FBtr0072467;FBtr0072466;FBtr0072465;FBtr0072468;FBtr0333218;FBtr0072464;FBtr0072471;FBtr0072470;FBtr0072469	23.4062	23.5638	23.9099	23.5005	21.8798	21.8798	21.8798	21.8798	0.000110018	0.924122	1.71533	FALSE	Pdk1
FBtr0299865;FBtr0299866;FBtr0072475;FBtr0301889;FBtr0299864	21.8798	21.8798	21.8798	21.8798	21.8798	21.8798	21.8798	21.8798	0.421923	0	0	FALSE	p130CAS
FBtr0305546;FBtr0305545;FBtr0305544;FBtr0072479;FBtr0072478;FBtr0072477	30.5535	30.7329	30.9307	29.7216	31.5159	31.298	31.3211	30.9937	0.118582	0.701907	-0.797514	FALSE	Mtch
FBtr0072481;FBtr0072480;FBtr0346614	26.5946	27.2402	27.1163	26.8152	21.8798	23.049	24.7734	24.3364	0.0156619	0.843619	3.43194	FALSE	mri
FBtr0072483	27.3679	27.991	27.8377	27.2237	28.1388	27.9246	28.1544	28.1761	0.144734	0.675857	-0.49338	FALSE	NitFhit
FBtr0072487;FBtr0072486	26.5472	26.8792	23.1383	23.9184	25.4805	24.8059	22.2021	21.8798	0.421923	0.403811	1.52871	FALSE	CG16940
FBtr0072501	22.729	21.8798	22.6074	21.8798	21.8798	21.8798	21.8798	21.8798	0.33159	0.537933	0.394192	FALSE	mthl14
FBtr0310415;FBtr0072503	29.7889	29.7324	29.3888	29.4565	27.944	27.9117	28.0479	28.7511	0.00644811	0.874458	1.42796	FALSE	mRpL17
FBtr0332839;FBtr0332838;FBtr0072506;FBtr0332837;FBtr0332836	23.2005	21.8798	21.8798	23.436	21.8798	21.8798	21.8798	21.8798	0.33159	0.537664	0.719233	FALSE	miple2
FBtr0332841;FBtr0072516;FBtr0072515;FBtr0072517	21.8798	21.8798	21.8798	21.8798	21.8798	21.8798	21.8798	21.8798	0.421923	0	0	FALSE	fwd
FBtr0332107;FBtr0072519	33.9706	33.9545	33.9487	33.7627	33.2939	33.3364	33.05	32.9759	0.00378059	0.887235	0.745041	FALSE	Tudor-SN
FBtr0305325;FBtr0332108;FBtr0332110;FBtr0332109;FBtr0072520	21.8798	21.8798	21.8798	21.8798	21.8798	21.8798	21.8798	21.8798	0.421923	0	0	FALSE	DIP2
FBtr0072522;FBtr0332103;FBtr0332104;FBtr0301348;FBtr0072521;FBtr0332102;FBtr0301349;FBtr0072523;FBtr0332101	21.8798	22.9083	23.6563	21.8798	21.8798	21.8798	21.8798	21.8798	0.355194	0.51615	0.701261	FALSE	E(bx)
FBtr0072527;FBtr0072526	21.8798	21.8798	21.8798	21.8798	21.8798	21.8798	21.8798	21.8798	0.421923	0	0	FALSE	thoc7
FBtr0344841;FBtr0344842;FBtr0072528;FBtr0331407;FBtr0344840	21.8798	24.2541	21.8798	21.8798	21.8798	23.9677	21.8798	21.8798	0.944574	0.034571	0.0716074	FALSE	CG7028
FBtr0072529;FBtr0072530	28.4236	29.2374	29.0058	27.7937	30.0852	30.4233	29.626	30.103	0.0389479	0.797053	-1.44426	FALSE	Gyk
FBtr0334069;FBtr0301890;FBtr0072536;FBtr0072535;FBtr0072534	26.91	26.894	26.987	23.9629	27.2955	27.6773	27.4078	27.1441	0.365064	0.509079	-1.19274	FALSE	Vdup1
FBtr0072537	26.0963	24.3161	24.6444	27.147	21.8798	21.8798	21.8798	21.8798	0.0114205	0.856559	3.67116	FALSE	CG7049
FBtr0331786;FBtr0072552;FBtr0072551	21.8798	21.8798	21.8798	21.8798	21.8798	21.8798	21.8798	21.8798	0.421923	0	0	FALSE	hipk
FBtr0072553	21.8798	21.8798	21.8798	21.8798	27.3037	27.5151	27.598	27.3295	5.39605e-08	0.93495	-5.55679	TRUE	Ppm1
FBtr0072554;FBtr0344912	21.8798	21.8798	21.8798	21.8798	21.8798	21.8798	21.8798	23.9492	0.421923	0.353553	-0.517364	FALSE	MED14
FBtr0306917;FBtr0072556	32.0782	32.1094	31.8939	31.4492	32.359	32.4735	32.6039	32.8032	0.0473846	0.784585	-0.677248	FALSE	Gale
FBtr0072558	23.3099	21.8798	21.8798	26.6966	21.8798	21.8798	21.8798	21.8798	0.421923	0.457766	1.56174	FALSE	MED30
FBtr0072559	26.3173	24.2245	26.3123	26.6171	21.8798	21.8798	21.8798	21.8798	0.00401457	0.885819	3.98801	TRUE	CG3402
FBtr0072561	27.984	27.6113	28.5353	27.3547	30.1583	29.465	29.0188	30.145	0.0194862	0.834194	-1.82546	FALSE	Reg-2
FBtr0072562	25.8138	25.3977	25.7391	21.8798	23.361	27.2867	26.0278	26.5449	0.490308	0.310005	-1.09753	FALSE	CG13893
FBtr0072564	28.0394	27.7204	28.0711	28.2935	24.0547	24.8912	23.8001	23.8987	0.000184553	0.921512	3.86988	TRUE	Cypl
FBtr0333852;FBtr0333851;FBtr0110818;FBtr0072565;FBtr0333850;FBtr0112807	21.8798	21.8798	21.8798	21.8798	21.8798	21.8798	21.8798	21.8798	0.421923	0	0	FALSE	klar
FBtr0300727;FBtr0072569	27.5882	27.5623	26.5975	28.1494	21.8798	21.8798	22.8567	24.1128	0.00306099	0.891731	4.79208	TRUE	Cdc5
FBtr0072576	25.0127	24.1789	25.4241	24.8333	21.8798	21.8798	21.8798	21.8798	0.000506734	0.914917	2.98248	TRUE	CG32344
FBtr0072577;FBtr0330078	24.1336	21.8798	22.9598	23.2025	21.8798	21.8798	21.8798	21.8798	0.151477	0.669868	1.16415	FALSE	RabX6
FBtr0345588;FBtr0072584;FBtr0072583	28.9982	29.5682	29.4573	29.0429	30.5408	30.3135	30.3098	30.0285	0.00996573	0.861413	-1.0315	FALSE	CG13887
FBtr0072587	26.4377	25.9927	26.6202	23.3407	26.0938	26.5787	26.6225	26.8103	0.421923	0.409319	-0.928509	FALSE	CG13890
FBtr0333267;FBtr0072589;FBtr0333266	28.0598	26.1992	26.4751	28.206	25.58	26.2742	21.8798	21.8798	0.141242	0.679295	3.33158	FALSE	CG32479
FBtr0345005;FBtr0072593	22.2455	26.5093	26.4652	22.5308	26.9969	26.6978	26.9486	26.7396	0.244414	0.596616	-2.40802	FALSE	CG13907
FBtr0331403;FBtr0072596	27.1705	26.7737	26.5379	27.4741	21.8798	21.8798	21.8798	21.8798	1.08541e-05	0.930807	5.10927	TRUE	CG13901
FBtr0072597	28.0828	28.6511	29.0405	27.6387	26.0691	21.8798	23.5817	21.8798	0.0196246	0.833919	5.0007	FALSE	CG13900
FBtr0072601;FBtr0331769	24.2941	22.8428	24.0913	25.2642	22.5452	24.2134	24.3029	24.1213	0.686216	0.18835	0.327393	FALSE	hng3
FBtr0072607	21.8798	21.8798	21.8798	21.8798	23.9697	23.0136	24.4157	25.15	0.0163651	0.841773	-2.25747	FALSE	Vti1
FBtr0072608	28.0815	28.2372	27.5494	28.1649	26.271	26.0814	26.1508	25.5312	0.00172018	0.901392	1.99964	FALSE	CG32483
FBtr0072609	28.7552	28.5785	28.8934	28.6755	27.1375	27.7618	25.5647	23.3962	0.113111	0.707318	2.76058	FALSE	CG3344
FBtr0072622;FBtr0072621	22.9639	24.1649	22.3489	26.7461	21.8798	21.8798	21.8798	21.8798	0.199903	0.630811	2.17618	FALSE	CG9205
FBtr0336738;FBtr0072634;FBtr0072630;FBtr0072629;FBtr0072628	23.845	21.8798	21.8798	23.3043	24.3024	21.8798	24.3012	22.63	0.576351	0.25622	-0.551156	FALSE	LysB;LysD;LysE;LysC
FBtr0072631	21.8798	21.8798	21.8798	21.8798	21.8798	21.8798	21.8798	21.8798	0.421923	0	0	FALSE	LysS
FBtr0072633	21.8798	21.8798	22.4959	21.8798	21.8798	21.8798	21.8798	21.8798	0.421923	0.353553	0.15402	FALSE	LysP
FBtr0072635	32.1911	31.4713	31.9825	32.6602	32.8677	32.6504	33.7091	33.4097	0.0863237	0.736512	-1.08296	FALSE	CG9119
FBtr0072637	21.8798	21.8798	21.8798	21.8798	21.8798	21.8798	21.8798	21.8798	0.421923	0	0	FALSE	LysX
FBtr0072638	21.8798	21.8798	21.8798	21.8798	21.8798	23.6238	23.9853	21.8798	0.331834	0.536914	-0.962392	FALSE	Trh
FBtr0333271;FBtr0072639	21.8798	21.8798	21.8798	21.8798	21.8798	21.8798	21.8798	21.8798	0.421923	0	0	FALSE	bab2
FBtr0072645;FBtr0072644	21.8798	21.8798	21.8798	21.8798	21.8798	21.8798	21.8798	21.8798	0.421923	0	0	FALSE	trio
FBtr0303217;FBtr0072652	27.9304	28.6022	28.8627	27.0967	28.8203	28.5238	28.116	28.5549	0.467476	0.324413	-0.38077	FALSE	Sac1
FBtr0072653	21.8798	21.8798	21.8798	21.8798	26.9278	27.0114	27.0103	27.5286	1.21712e-06	0.933481	-5.23975	TRUE	CG9129
FBtr0072657;FBtr0072655	21.8798	21.8798	21.8798	21.8798	28.8907	29.1322	29.2407	28.8295	6.70672e-08	0.934891	-7.14349	TRUE	CG9130
FBtr0072661;FBtr0072660;FBtr0072659	23.4216	24.3569	21.8798	21.8798	21.8798	21.8798	21.8798	21.8798	0.347971	0.521559	1.00472	FALSE	CG9134
FBtr0072663	23.2663	23.8116	21.8798	23.6329	21.8798	21.8798	21.8798	21.8798	0.105989	0.714336	1.26787	FALSE	Rabex-5
FBtr0072667	30.8812	30.6829	30.5694	31.3193	30.4164	30.3693	30.8263	30.5979	0.363666	0.510084	0.310713	FALSE	CG9149
FBtr0072669;FBtr0072668	25.1457	26.1551	24.5622	24.0384	21.8798	21.8798	21.8798	21.8798	0.00507242	0.880413	3.09558	TRUE	CG2469
FBtr0072671;FBtr0072670;FBtr0310555	25.6185	26.7622	26.6016	26.0893	27.0088	26.5282	26.9515	27.5988	0.203921	0.6273	-0.753914	FALSE	CG9153
FBtr0072674;FBtr0072673;FBtr0072672;FBtr0072675	31.9618	32.4175	32.1032	31.662	31.8527	32.0599	31.683	32.0745	0.602432	0.239868	0.11859	FALSE	Myo61F
FBtr0072677	29.4718	29.6493	29.6407	29.4451	29.2343	29.2706	30.5272	29.5083	0.832076	0.102659	-0.0833843	FALSE	mtacp1
FBtr0072678	24.9193	21.8798	23.0915	26.705	21.8798	21.8798	21.8798	21.8798	0.217777	0.616697	2.2691	FALSE	msd1
FBtr0072679	27.5552	27.3886	27.0423	26.9595	26.9576	27.697	26.1985	25.8579	0.421923	0.435279	0.558638	FALSE	l(3)02640
FBtr0310160;FBtr0072680	25.133	24.7125	24.7674	21.8798	21.8798	21.8798	21.8798	21.8798	0.100097	0.722322	2.2434	FALSE	312
FBtr0072692	21.8798	21.8798	21.8798	21.8798	24.4984	24.577	25.5393	26.6531	0.00509449	0.880283	-3.43715	TRUE	CG9168
FBtr0332655;FBtr0072695	21.8798	21.8798	21.8798	21.8798	22.8938	24.884	23.4996	23.5067	0.0294865	0.813329	-1.81624	FALSE	robl62A
FBtr0072699;FBtr0072701;FBtr0333395;FBtr0306557;FBtr0072702;FBtr0072700;FBtr0072698;FBtr0072697	32.2484	32.4177	32.4255	32.0576	32.8517	32.7823	32.7332	32.9366	0.0118338	0.855293	-0.538671	FALSE	Psa
FBtr0072704;FBtr0072705;FBtr0333402;FBtr0333401;FBtr0072703	21.8798	24.1125	24.1193	21.8798	21.8798	21.8798	21.8798	21.8798	0.331486	0.540061	1.11806	FALSE	CG12090
FBtr0072706	27.1239	27.2182	26.6938	28.202	21.8798	21.8798	21.8798	21.8798	7.1162e-05	0.925897	5.42967	TRUE	cue
FBtr0072709;FBtr0301523;FBtr0300420;FBtr0300419;FBtr0300418;FBtr0300417;FBtr0300416;FBtr0072710;FBtr0072708;FBtr0072707	28.4686	28.3754	27.986	28.6571	26.9074	27.6318	27.3083	27.1225	0.0127953	0.852232	1.1293	FALSE	pUf68
FBtr0332656;FBtr0072711	23.8902	24.9625	23.7096	21.8798	21.8798	23.6813	24.4039	21.8798	0.565831	0.262671	0.649316	FALSE	CG12084
FBtr0072717;FBtr0072718;FBtr0072716;FBtr0310161;FBtr0072719	21.8798	23.1576	24.4727	22.4758	21.8798	21.8798	21.8798	21.8798	0.250677	0.592444	1.11669	FALSE	Ptp61F
FBtr0331865;FBtr0072722;FBtr0072721	22.7445	22.6176	25.4649	26.8231	21.8798	22.3763	21.8798	21.8798	0.18688	0.640982	2.40861	FALSE	CG2199
FBtr0331866;FBtr0072723	21.8798	21.8798	21.8798	21.8798	21.8798	21.8798	21.8798	21.8798	0.421923	0	0	FALSE	CG2211
FBtr0072724	21.8798	21.8798	21.8798	21.8798	21.8798	21.8798	21.8798	21.8798	0.421923	0	0	FALSE	msd5
FBtr0072726;FBtr0072725	23.1941	21.8798	24.9844	24.4394	21.8798	21.8798	21.8798	21.8798	0.15015	0.671011	1.74466	FALSE	CG9184
FBtr0072728;FBtr0072727	28.9964	29.4121	29.776	28.3806	29.3211	29.2924	29.1979	29.4602	0.642021	0.215633	-0.176579	FALSE	CG9186
FBtr0331867;FBtr0072729;FBtr0345006	28.7698	28.3648	28.3292	28.8097	28.6011	28.9058	28.63	28.6047	0.526485	0.287477	-0.117041	FALSE	CG2277
FBtr0331868;FBtr0072730	28.9309	29.5683	29.4889	28.497	28.9467	29.1914	29.8467	29.4171	0.561558	0.265355	-0.229142	FALSE	Rac1
FBtr0072731	22.6721	26.0268	23.9182	25.8547	21.8798	21.8798	21.8798	21.8798	0.0664918	0.758842	2.73819	FALSE	Psf1
FBtr0072733	23.6727	24.496	23.3026	24.3374	21.8798	21.8798	21.8798	21.8798	0.00366817	0.887888	2.07239	TRUE	Klp61F
FBtr0072737;FBtr0072736;FBtr0072735	21.8798	21.8798	21.8798	21.8798	21.8798	21.8798	21.8798	21.8798	0.421923	0	0	FALSE	CG7852
FBtr0345365;FBtr0333396;FBtr0072741;FBtr0072740;FBtr0072739;FBtr0072738	22.1345	22.7795	21.8798	21.8798	22.7857	25.292	21.8798	22.7315	0.421923	0.441092	-1.00388	FALSE	Cct1
FBtr0072744	21.8798	21.8798	21.8798	21.8798	21.8798	21.8798	21.8798	21.8798	0.421923	0	0	FALSE	CG12003
FBtr0072755;FBtr0072754	28.0636	28.5444	28.9202	27.1291	28.8556	29.2951	28.5104	29.0023	0.313992	0.551777	-0.751552	FALSE	ABCB7
FBtr0072757	21.8798	21.8798	21.8798	21.8798	21.8798	21.8798	21.8798	21.8798	0.421923	0	0	FALSE	CG33230
FBtr0331460;FBtr0072762;FBtr0346821	21.8798	21.8798	21.8798	21.8798	21.8798	24.1583	21.8798	21.8798	0.421923	0.353553	-0.569641	FALSE	CG7970
FBtr0072764	21.8798	21.8798	21.8798	24.0053	21.8798	21.8798	21.8798	21.8798	0.421923	0.353553	0.531381	FALSE	CG12011
FBtr0072766	21.8798	21.8798	21.8798	21.8798	23.9693	23.3203	24.1152	22.9717	0.00685084	0.872732	-1.71436	FALSE	CG12035
FBtr0345817;FBtr0072771;FBtr0072770;FBtr0072769;FBtr0072768;FBtr0072767	29.161	28.9497	29.0617	28.5185	30.2452	30.3076	29.5611	30.1663	0.015304	0.844736	-1.14735	FALSE	Gk
FBtr0334074;FBtr0300292;FBtr0334073;FBtr0072774	25.4866	21.8798	22.324	21.8798	21.8798	21.8798	21.8798	21.8798	0.421923	0.401135	1.01277	FALSE	CG8001
FBtr0072775	27.6338	26.5292	26.7993	29.0942	21.8798	21.8798	21.8798	21.8798	0.00113176	0.907325	5.63436	TRUE	CG12018
FBtr0072776	28.377	28.6273	28.2697	29.3852	27.8736	27.4328	27.8634	28.181	0.115548	0.704641	0.827155	FALSE	mRpL46
FBtr0072777	30.4112	30.1069	30.1292	31.1126	29.6529	29.2588	29.6032	29.6128	0.0550651	0.773662	0.908055	FALSE	Cdc37
FBtr0301625;FBtr0072781;FBtr0072779	25.914	24.0678	24.4096	25.1775	24.4911	24.004	26.1118	23.2634	0.641502	0.21594	0.424655	FALSE	Patj
FBtr0072784	21.8798	21.8798	21.8798	21.8798	24.1083	24.9097	24.0313	24.8918	0.000683082	0.9124	-2.60549	TRUE	GV1
FBtr0332875;FBtr0299562;FBtr0072786	29.1176	28.8361	28.9454	29.6026	29.6202	28.8395	28.8478	28.4343	0.611886	0.234034	0.189971	FALSE	Cpr62Bb
FBtr0072789;FBtr0332879	22.3099	23.905	24.1931	21.9736	24.1457	23.0824	24.3681	22.7064	0.576351	0.256204	-0.480246	FALSE	alpha-Spec
FBtr0072790	21.8798	21.8798	21.8798	21.8798	21.8798	21.8798	21.8798	21.8798	0.421923	0	0	FALSE	dlt
FBtr0072791	27.4131	28.0854	27.8778	26.6921	27.2258	27.3069	23.2129	26.5396	0.421923	0.46979	1.4458	FALSE	CG2021
FBtr0334075;FBtr0305966;FBtr0072795	28.2304	27.9226	27.3747	28.9518	26.1712	25.1587	24.7139	21.8798	0.0494778	0.781749	3.63897	FALSE	Cht2
FBtr0072799;FBtr0334079;FBtr0072798;FBtr0334078;FBtr0334080;FBtr0309845	21.8798	21.8798	21.8798	21.8798	21.8798	21.8798	21.8798	21.8798	0.421923	0	0	FALSE	drpr
FBtr0334081;FBtr0072802	21.8798	21.8798	21.8798	21.8798	21.8798	21.8798	21.8798	21.8798	0.421923	0	0	FALSE	CG13931
FBtr0072805	33.082	33.0011	33.0037	32.9558	32.4147	32.3517	32.156	31.9229	0.0045327	0.883206	0.799291	FALSE	RpL23A
FBtr0309252;FBtr0072806;FBtr0072807;FBtr0303107	21.8798	21.8798	21.8798	21.8798	21.8798	21.8798	21.8798	21.8798	0.421923	0	0	FALSE	CG7971
FBtr0072809	28.5802	28.2535	28.4064	28.5549	27.9156	28.0439	27.9028	27.899	0.00795746	0.868373	0.508435	FALSE	CG7967
FBtr0072810	21.8798	21.8798	21.8798	21.8798	21.8798	21.8798	21.8798	21.8798	0.421923	0	0	FALSE	CG17249
FBtr0072812;FBtr0072811	31.499	31.8565	31.6185	31.1951	31.5138	31.4485	31.3018	31.1722	0.421923	0.401664	0.183235	FALSE	alphaCOP
FBtr0072813;FBtr0072814	21.8798	21.8798	21.8798	21.8798	21.8798	21.8798	21.8798	21.8798	0.421923	0	0	FALSE	metl
FBtr0331462;FBtr0300893;FBtr0072815;FBtr0331461;FBtr0306578;FBtr0302310;FBtr0300894;FBtr0072819	28.0714	28.83	28.7448	27.0189	29.0535	28.6927	28.5655	28.585	0.421923	0.435095	-0.557884	FALSE	nSyb
FBtr0072822	26.1915	22.1067	23.8205	24.1145	26.9685	26.2475	21.8798	24.2684	0.657813	0.206091	-0.782767	FALSE	CG13928
FBtr0072823	28.1475	27.9855	27.7254	28.4822	26.7902	27.0619	27.2561	27.1768	0.0130593	0.851482	1.01391	FALSE	CG13926
FBtr0072827;FBtr0072826	21.8798	21.8798	21.8798	21.8798	21.8798	21.8798	21.8798	21.8798	0.421923	0	0	FALSE	CG7879
FBtr0072829;FBtr0072828	24.085	21.8798	21.8798	21.8798	21.8798	21.8798	21.8798	21.8798	0.421923	0.353553	0.551298	FALSE	CG12099
FBtr0333400;FBtr0072831	23.3429	21.8798	24.6512	23.1206	23.6992	23.9966	23.8545	24.3348	0.421923	0.422048	-0.722691	FALSE	CG12091
FBtr0072833;FBtr0303152;FBtr0072832	22.9259	26.0761	25.9068	26.7776	26.445	23.7651	27.2348	26.1759	0.734057	0.160383	-0.483602	FALSE	CG12024
FBtr0345381;FBtr0332668;FBtr0072834	21.8798	21.8798	21.8798	21.8798	23.4237	23.3047	21.8798	21.8798	0.331486	0.539485	-0.742214	FALSE	CG12025
FBtr0072837;FBtr0072836	21.8798	21.8798	21.8798	21.8798	21.8798	21.8798	21.8798	21.8798	0.421923	0	0	FALSE	Tmhs
FBtr0072841	21.8798	21.8798	21.8798	21.8798	21.8798	21.8798	21.8798	21.8798	0.421923	0	0	FALSE	Mfap1
FBtr0333430;FBtr0072842	21.8798	21.8798	21.8798	21.8798	21.8798	21.8798	21.8798	21.8798	0.421923	0	0	FALSE	Cnb
FBtr0333431;FBtr0072843;FBtr0072844	30.6325	30.5432	30.7112	30.3803	30.894	31.0142	31.1729	31.15	0.0157531	0.843352	-0.490944	FALSE	SCOT
FBtr0072857;FBtr0301465;FBtr0072856	24.4316	21.8798	23.9246	24.6311	21.8798	21.8798	21.8798	21.8798	0.104452	0.71617	1.837	FALSE	mu2
FBtr0072865;FBtr0072864	28.99	29.3179	29.6919	28.9137	24.2771	27.9287	25.3237	28.8351	0.16487	0.658433	2.63723	FALSE	dre4
FBtr0345807;FBtr0072866	26.4043	21.8798	23.7664	27.0654	21.8798	21.8798	21.8798	21.8798	0.167051	0.656677	2.8992	FALSE	HBS1
FBtr0332671;FBtr0303154;FBtr0072867	29.5806	29.7498	30.0638	29.2033	29.7835	29.7811	29.5788	29.8523	0.67198	0.196965	-0.0995764	FALSE	R
FBtr0332673;FBtr0072869	30.4873	31.2649	30.808	31.2695	31.3531	30.2762	31.186	30.7818	0.882335	0.0722739	0.0581331	FALSE	Cpr62Bc
FBtr0072871;FBtr0072872	21.8798	21.8798	21.8798	21.8798	21.8798	21.8798	21.8798	21.8798	0.421923	0	0	FALSE	CG8960
FBtr0332664;FBtr0072877	29.158	29.1459	28.7354	29.5784	27.5667	27.3993	27.9994	28.1277	0.0108647	0.858459	1.38117	FALSE	CG2034
FBtr0072879	21.8798	21.8798	21.8798	21.8798	21.8798	21.8798	21.8798	21.8798	0.421923	0	0	FALSE	CG13806
FBtr0072881	21.8798	21.8798	21.8798	21.8798	21.8798	21.8798	21.8798	21.8798	0.421923	0	0	FALSE	CG32302
FBtr0072883	29.2301	30.2875	30.2708	30.0783	21.8798	21.8798	21.8798	21.8798	2.76836e-06	0.932742	8.08686	TRUE	yellow-g2
FBtr0072889	31.3752	30.8369	30.9571	31.5705	31.3595	31.3764	31.4172	31.422	0.421923	0.412796	-0.208871	FALSE	CG8993
FBtr0072890	21.8798	21.8798	21.8798	21.8798	21.8798	21.8798	21.8798	23.777	0.421923	0.353553	-0.474318	FALSE	CG9004
FBtr0072899	21.8798	21.8798	21.8798	21.8798	21.8798	21.8798	21.8798	21.8798	0.421923	0	0	FALSE	CG15877
FBtr0331416;FBtr0331415;FBtr0289966;FBtr0072900	29.7901	29.2522	29.2142	29.6062	28.5173	28.4818	28.2553	28.357	0.00459489	0.882843	1.06281	FALSE	mRpL23
FBtr0345587;FBtr0300773;FBtr0072901	21.8798	21.8798	21.8798	21.8798	21.8798	21.8798	21.8798	21.8798	0.421923	0	0	FALSE	CG1317
FBtr0072902	31.7782	32.2781	31.7346	31.8255	21.8798	21.8798	21.8798	21.8798	4.95851e-08	0.934971	10.0243	TRUE	yellow-g
FBtr0072903	25.7015	26.2442	26.0659	26.2297	21.8798	21.8798	21.8798	21.8798	2.43529e-06	0.932866	4.18054	TRUE	ecd
FBtr0072904	21.8798	21.8798	21.8798	21.8798	21.8798	21.8798	21.8798	21.8798	0.421923	0	0	FALSE	oxt
FBtr0072908;FBtr0072906;FBtr0072907;FBtr0072905	21.8798	23.0178	21.8798	21.8798	26.1065	23.5274	23.0513	26.1763	0.104836	0.715654	-2.5511	FALSE	CG1275
FBtr0072910;FBtr0072909	21.8798	25.5968	23.2799	26.6869	24.3645	21.8798	21.8798	21.8798	0.406062	0.484284	1.85986	FALSE	CG9018
FBtr0072912;FBtr0308231;FBtr0308230	26.2871	26.684	26.6598	26.1754	27.0125	26.8935	26.3493	26.4895	0.421923	0.396624	-0.234637	FALSE	CG5707
FBtr0072913	23.8644	23.1233	25.9255	24.0821	21.8798	21.8798	21.8798	21.8798	0.0391427	0.796585	2.36907	FALSE	CG15820
FBtr0346076;FBtr0072915	26.1547	22.0283	25.3883	25.0197	21.8798	21.8798	21.8798	23.3215	0.157504	0.664522	2.40756	FALSE	CG5704
FBtr0072925;FBtr0072924	34.3616	33.9646	34.1059	34.7725	33.0053	33.2842	33.0287	32.9129	0.0066624	0.873599	1.24338	FALSE	RpL8
FBtr0072926;FBtr0072927	21.8798	21.8798	21.8798	21.8798	21.8798	21.8798	21.8798	21.8798	0.421923	0	0	FALSE	dos
FBtr0072929	28.8899	29.7209	28.8902	29.5039	29.966	30.0186	29.921	30.1603	0.0613115	0.765498	-0.765255	FALSE	CG16985
FBtr0302434;FBtr0072930	30.2454	28.7839	30.143	30.0169	30.5576	30.9332	31.294	31.3114	0.0815766	0.741772	-1.22676	FALSE	CG16986
FBtr0290340;FBtr0072936;FBtr0072935;FBtr0072934;FBtr0072933;FBtr0072932;FBtr0072931	25.7398	26.1248	27.5531	25.7798	21.8798	21.8798	21.8798	21.8798	0.00086488	0.910299	4.4196	TRUE	MEP-1
FBtr0333445;FBtr0072937	21.8798	21.8798	21.8798	21.8798	21.8798	21.8798	21.8798	21.8798	0.421923	0	0	FALSE	CG1143
FBtr0345027;FBtr0333446;FBtr0303022;FBtr0072938	21.8798	21.8798	21.8798	21.8798	21.8798	21.8798	24.8601	23.4029	0.370908	0.505901	-1.12586	FALSE	CG1246
FBtr0072943	26.3243	21.8798	21.8798	21.8798	32.4586	31.5797	32.6193	32.0919	0.00249775	0.895405	-9.19646	TRUE	Acp62F
FBtr0072948	26.5077	26.202	26.6736	27.0358	26.022	26.0577	27.2936	26.6975	0.844928	0.095031	0.0870667	FALSE	Aats-pro
FBtr0072954;FBtr0072953;FBtr0072952;FBtr0072951	21.8798	21.8798	21.8798	21.8798	24.5557	23.0135	23.389	24.5419	0.0166579	0.841061	-1.99524	FALSE	Pxn
FBtr0072956;FBtr0333362;FBtr0333365;FBtr0072957;FBtr0333364;FBtr0333363;FBtr0072959;FBtr0072958	23.5408	25.9377	24.4317	22.1879	26.3258	22.7872	21.8798	23.7816	0.834224	0.101233	0.33092	FALSE	msn
FBtr0072963;FBtr0331414;FBtr0072965;FBtr0072966;FBtr0072964;FBtr0306577	27.5562	26.9688	26.8198	25.5875	30.1241	30.2812	30.2837	30.441	0.00206455	0.898661	-3.54942	TRUE	CG16758
FBtr0072967	22.6122	23.9893	23.1135	21.8798	27.7105	27.2996	26.4873	26.9795	0.00233656	0.896536	-4.22053	TRUE	Cyp4d20
FBtr0072968	21.8798	21.8798	21.8798	21.8798	21.8798	21.8798	21.8798	21.8798	0.421923	0	0	FALSE	CG16762
FBtr0072969	28.9911	28.9938	29.4638	28.9243	29.355	28.6371	28.6711	28.7557	0.421923	0.39408	0.238511	FALSE	Non2
FBtr0333441;FBtr0072970	21.8798	21.8798	21.8798	21.8798	21.8798	21.8798	21.8798	21.8798	0.421923	0	0	FALSE	Atg2
FBtr0333442;FBtr0072973;FBtr0072972	22.5576	26.0534	26.3262	21.8798	26.531	23.8531	21.8798	21.8798	0.738792	0.157555	0.668308	FALSE	pgant6
FBtr0072978	31.0544	31.123	31.135	30.7709	31.3142	31.299	31.2288	31.4188	0.0856873	0.737482	-0.294398	FALSE	CG2107
FBtr0332084;FBtr0072979	21.8798	21.8798	21.8798	21.8798	23.1446	24.2156	25.1647	24.6163	0.0110716	0.857798	-2.40551	FALSE	CG2113
FBtr0345029;FBtr0072981;FBtr0345028	21.8798	21.8798	21.8798	21.8798	21.8798	21.8798	21.8798	21.8798	0.421923	0	0	FALSE	CG2162
FBtr0332112;FBtr0072983;FBtr0072982	28.4863	28.3511	28.0988	28.2112	28.8907	28.6697	28.5347	28.2767	0.25403	0.590427	-0.306095	FALSE	Jafrac2
FBtr0072985	26.5581	25.954	26.6048	26.4527	26.6618	27.0051	26.7152	26.9915	0.141613	0.678729	-0.450985	FALSE	CG32485
FBtr0072986;FBtr0072988;FBtr0072987;FBtr0072989	21.8798	21.8798	21.8798	21.8798	23.273	24.2389	21.8798	24.2288	0.122878	0.69742	-1.52536	FALSE	CG1271
FBtr0072990	21.8798	21.8798	23.9249	23.7949	21.8798	21.8798	21.8798	21.8798	0.331486	0.539674	0.990055	FALSE	CG16753
FBtr0072996;FBtr0072995;FBtr0072993;FBtr0113129;FBtr0332113;FBtr0113130;FBtr0072999	21.8798	21.8798	21.8798	21.8798	21.8798	21.8798	21.8798	21.8798	0.421923	0	0	FALSE	CG11486
FBtr0073004	25.9389	25.6978	26.1799	21.8798	26.7212	25.9429	23.195	25.9586	0.741543	0.155951	-0.53034	FALSE	CG32486
FBtr0073005	28.2529	28.5904	27.9992	26.6913	27.4919	27.9113	26.7608	27.7956	0.519421	0.291794	0.393551	FALSE	scramb2
FBtr0346075;FBtr0073008	21.8798	21.8798	21.8798	21.8798	21.8798	24.8393	21.8798	21.8798	0.421923	0.353553	-0.739875	FALSE	CG32488
FBtr0073011	24.1606	23.7697	21.8798	23.9971	23.4209	21.8798	24.1864	24.3929	0.985415	0.0089156	-0.0181706	FALSE	spz5
FBtr0073015	23.8811	24.3082	28.7788	29.9296	21.8798	21.8798	21.8798	21.8798	0.0849021	0.738274	4.84466	FALSE	CG12093
FBtr0073016	27.9081	28.3237	28.5232	27.5777	29.1769	28.7835	29.1324	28.6155	0.0694489	0.755401	-0.843928	FALSE	CG9977
FBtr0073023	28.3624	28.4311	28.7817	28.1224	28.3945	28.9476	27.7112	28.2908	0.808452	0.11638	0.0883395	FALSE	CG1291
FBtr0073033	21.8798	21.8798	21.8798	21.8798	21.8798	21.8798	21.8798	21.8798	0.421923	0	0	FALSE	CG32278
FBtr0073034	21.8798	21.8798	21.8798	22.2957	21.8798	21.8798	21.8798	21.8798	0.421923	0.353553	0.103986	FALSE	CG32281
FBtr0073036;FBtr0332098;FBtr0332099;FBtr0332097;FBtr0073035	22.9677	24.2284	24.3848	23.9539	21.8798	21.8798	21.8798	21.8798	0.00703813	0.871844	2.00393	TRUE	Girdin
FBtr0073038	21.8798	21.8798	21.8798	21.8798	21.8798	21.8798	21.8798	21.8798	0.421923	0	0	FALSE	CG14957
FBtr0332873;FBtr0073040	35.1555	35.5155	35.3351	35.2901	34.5924	34.5166	34.2974	34.4369	0.00170911	0.901551	0.863204	FALSE	Hsp83
FBtr0073042	21.8798	22.5853	22.9502	21.8798	23.5368	21.8798	21.8798	21.8798	0.962802	0.023025	0.0297229	FALSE	gry
FBtr0073044	29.0915	29.1398	28.8126	30.3753	28.7512	28.6207	27.145	28.2672	0.18754	0.640126	1.1588	FALSE	CG17737
FBtr0308061;FBtr0073045;FBtr0073046	26.4263	27.1298	25.6196	28.0116	24.1175	24.5878	21.8798	24.9345	0.0657191	0.759731	2.91692	FALSE	CG11505
FBtr0308313;FBtr0308312;FBtr0073052;FBtr0308311	21.8798	21.8798	21.8798	21.8798	21.8798	21.8798	21.8798	21.8798	0.421923	0	0	FALSE	CG12017
FBtr0308314;FBtr0073053	21.8798	21.8798	21.8798	21.8798	21.8798	21.8798	21.8798	22.8993	0.421923	0.353553	-0.254877	FALSE	CG12009
FBtr0073059	21.8798	21.8798	21.8798	21.8798	21.8798	21.8798	21.8798	21.8798	0.421923	0	0	FALSE	Drsl2
FBtr0073061	30.0129	28.4666	30.1252	30.9521	30.0741	29.8128	31.4881	30.8421	0.421923	0.363925	-0.665067	FALSE	Drsl4
FBtr0073062	26.0887	25.5237	26.4882	27.4332	26.5478	26.4258	27.0146	26.16	0.781295	0.132027	-0.153607	FALSE	Drsl5
FBtr0073064;FBtr0073063	21.8798	21.8798	21.8798	21.8798	21.8798	21.8798	21.8798	21.8798	0.421923	0	0	FALSE	CG12016
FBtr0073067;FBtr0073066;FBtr0073068	32.5759	32.3161	32.6514	32.7082	32.9942	33.0782	33.3238	32.9562	0.0275179	0.816783	-0.525192	FALSE	PHGPx
FBtr0073069	24.1124	24.4456	25.4646	21.8798	25.5592	23.7517	21.8798	21.8798	0.62503	0.225894	0.707975	FALSE	CG14961
FBtr0332057;FBtr0073072;FBtr0332056;FBtr0300017;FBtr0303857;FBtr0073070;FBtr0073071	31.907	32.15	32.0441	31.8656	31.9307	31.6531	31.4872	31.5552	0.11006	0.710263	0.335137	FALSE	kst
FBtr0073073	29.8709	29.6971	30.807	26.9013	21.8798	21.8798	21.8798	21.8798	0.00171991	0.901415	7.43929	TRUE	Drs
FBtr0073075	24.866	23.9936	24.2109	21.8798	23.4924	21.8798	23.0123	25.2841	0.790785	0.126446	0.320434	FALSE	CG12010
FBtr0073077	21.8798	21.8798	21.8798	21.8798	21.8798	23.808	21.8798	23.0264	0.352549	0.518199	-0.768722	FALSE	CG12014
FBtr0073079;FBtr0073078	21.8798	21.8798	21.8798	21.8798	21.8798	21.8798	21.8798	21.8798	0.421923	0	0	FALSE	YT521-B
FBtr0073080	21.8798	21.8798	21.8798	21.8798	21.8798	21.8798	21.8798	21.8798	0.421923	0	0	FALSE	Drsl6
FBtr0073081	21.8798	21.8798	21.8798	21.8798	21.8798	21.8798	21.8798	21.8798	0.421923	0	0	FALSE	Drsl1
FBtr0073082	24.0718	21.8798	23.8965	21.8798	21.8798	21.8798	21.8798	21.8798	0.331486	0.539438	1.05219	FALSE	CG14969
FBtr0332058;FBtr0073083;FBtr0073084	23.6675	23.7335	24.1342	21.8798	22.7493	26.5999	26.1438	26.2795	0.245911	0.595533	-2.08938	FALSE	Strip
FBtr0073090;FBtr0073089;FBtr0073088;FBtr0073087;FBtr0073086	21.8798	21.8798	21.8798	21.8798	21.8798	21.8798	21.8798	21.8798	0.421923	0	0	FALSE	CG14968
FBtr0073094;FBtr0073093	25.831	26.4528	26.6334	27.4799	22.8219	21.8798	23.8225	24.2439	0.0127911	0.852269	3.40725	FALSE	CG17746
FBtr0306567;FBtr0302301;FBtr0302300;FBtr0073098;FBtr0073097;FBtr0073095	33.9939	33.405	33.6651	34.1657	32.9983	33.0289	33.0007	32.5674	0.025425	0.820993	0.908627	FALSE	RpL28
FBtr0073102	21.8798	21.8798	21.8798	21.8798	21.8798	21.8798	21.8798	21.8798	0.421923	0	0	FALSE	CG33160
FBtr0073103	23.892	23.5092	26.2857	21.8798	21.8798	21.8798	21.8798	21.8798	0.20439	0.626956	2.01191	FALSE	CG32277
FBtr0073108	23.1878	21.8798	23.3269	22.9291	23.6863	24.2133	21.8798	21.8798	0.92535	0.0463813	-0.0838951	FALSE	CG14966
FBtr0073109	21.8798	21.8798	21.8798	21.8798	21.8798	21.8798	21.8798	21.8798	0.421923	0	0	FALSE	CG14965
FBtr0073111	21.8798	21.8798	21.8798	21.8798	21.8798	21.8798	21.8798	21.8798	0.421923	0	0	FALSE	CG14963
FBtr0073113	34.2614	34.2235	34.4078	34.4739	34.3356	34.2996	34.4053	34.36	0.918024	0.0509616	-0.00846806	FALSE	NDUFS3
FBtr0307308;FBtr0073114	32.0166	31.9871	31.7482	32.1932	30.9351	31.0588	30.7986	30.8552	0.0010183	0.908541	1.07436	FALSE	CG12082
FBtr0073115;FBtr0073117;FBtr0073116;FBtr0333894;FBtr0113133;FBtr0113132;FBtr0309235	21.8798	21.8798	21.8798	21.8798	21.8798	21.8798	21.8798	21.8798	0.421923	0	0	FALSE	CG11537
FBtr0337056;FBtr0306258;FBtr0333895;FBtr0073120;FBtr0073119;FBtr0073118;FBtr0337055	21.8798	21.8798	21.8798	21.8798	23.4502	26.463	23.3542	23.4836	0.0940169	0.728489	-2.30796	FALSE	prominin-like
FBtr0073124	21.8798	21.8798	21.8798	21.8798	21.8798	21.8798	21.8798	21.8798	0.421923	0	0	FALSE	Cht7
FBtr0110922;FBtr0302598;FBtr0110924;FBtr0110920;FBtr0073135;FBtr0073134;FBtr0073133;FBtr0301948;FBtr0110925;FBtr0110923;FBtr0110921;FBtr0073132;FBtr0073131;FBtr0330068	25.8448	22.8383	25.4981	21.8798	25.2689	21.8798	24.2105	21.8798	0.663232	0.202576	0.705513	FALSE	Eip63E
FBtr0073141	21.8798	21.8798	21.8798	21.8798	21.8798	21.8798	21.8798	21.8798	0.421923	0	0	FALSE	ImpE2
FBtr0073142	27.4949	26.432	21.8798	27.1422	26.7028	24.1064	21.8798	21.8798	0.421923	0.413146	2.09501	FALSE	CG32267
FBtr0309839;FBtr0309836;FBtr0073144;FBtr0309837;FBtr0309838	29.4396	29.7598	30.062	29.098	28.9382	27.4904	25.1439	24.7707	0.100127	0.722057	3.00406	FALSE	eIF5B
FBtr0073148	25.1196	21.8798	21.8798	21.8798	21.8798	21.8798	21.8798	21.8798	0.421923	0.353553	0.809962	FALSE	IntS10
FBtr0073149;FBtr0073150	24.4385	23.9092	27.023	21.8798	27.0757	26.5273	27.2026	26.5889	0.175551	0.649819	-2.536	FALSE	CG12006
FBtr0303096;FBtr0073151	34.7027	34.4781	34.775	34.8876	34.7417	34.8201	34.8911	35.0496	0.392501	0.493051	-0.164758	FALSE	Scsalpha
FBtr0333209;FBtr0112844;FBtr0073152;FBtr0073153;FBtr0333210;FBtr0112845;FBtr0333208	22.4607	21.8798	24.2063	26.4396	21.8798	21.8798	21.8798	22.8413	0.38307	0.499066	1.62644	FALSE	enc
FBtr0073158;FBtr0330095	25.7929	24.5305	21.8767	24.2287	21.8798	23.786	21.8798	21.8798	0.294354	0.563967	1.75086	FALSE	CG14977
FBtr0073159	29.79	30.561	30.7764	29.7805	31.7641	31.7614	31.2347	31.0737	0.0414437	0.793013	-1.23147	FALSE	Sc2
FBtr0073160	23.064	21.8798	23.4249	23.7041	21.8798	21.8798	21.8798	21.8798	0.112482	0.707888	1.13844	FALSE	ida
FBtr0073164	21.8798	21.8798	21.8798	21.8798	21.8798	21.8798	21.8798	21.8798	0.421923	0	0	FALSE	CG10853
FBtr0073171	32.966	32.9009	32.9324	32.6186	33.5011	33.4417	33.6114	33.643	0.00345533	0.889255	-0.694835	FALSE	CG10863
FBtr0073172	27.1053	27.7734	27.576	25.8913	28.6345	28.8691	28.2338	28.9552	0.0600397	0.767066	-1.58665	FALSE	CG12766
FBtr0073176	26.314	24.065	26.8498	26.5415	26.367	26.1633	27.0287	26.1788	0.555303	0.269574	-0.491829	FALSE	mge
FBtr0073180	21.8798	23.8428	25.9247	23.7848	25.7494	25.4148	25.2151	25.5337	0.267276	0.581403	-1.62021	FALSE	Ccz1
FBtr0346805;FBtr0073182	21.8798	21.8798	21.8798	21.8798	30.2127	29.8373	29.8013	30.3069	1.1665e-07	0.934716	-8.15976	TRUE	Acp63F
FBtr0073185	21.8798	21.8798	21.8798	21.8798	21.8798	21.8798	21.8798	21.8798	0.421923	0	0	FALSE	ntc
FBtr0113430;FBtr0073187;FBtr0332986;FBtr0308639;FBtr0303097;FBtr0308638;FBtr0073188	21.8798	21.8798	21.8798	21.8798	21.8798	21.8798	21.8798	21.8798	0.421923	0	0	FALSE	CG32264
FBtr0346806;FBtr0073193	27.2976	27.2867	26.5608	26.7609	27.3588	27.2293	26.9363	27.2957	0.421923	0.381561	-0.228526	FALSE	Mul1
FBtr0073202	25.9047	23.415	22.9106	24.9783	21.8798	21.8798	21.8798	21.8798	0.0605844	0.766357	2.42238	FALSE	Rcd5
FBtr0073203	21.7275	24.151	23.8064	23.3442	27.6643	27.3216	27.7	27.8336	0.00266409	0.894366	-4.3726	TRUE	CG1136
FBtr0332979;FBtr0073204	21.8798	21.8798	21.8798	21.8798	25.8579	26.7145	26.5078	26.0691	1.72529e-05	0.929888	-4.40755	TRUE	CG18869
FBtr0073205	21.8798	21.8798	21.8798	21.8798	21.8798	21.8798	21.8798	21.8798	0.421923	0	0	FALSE	dib
FBtr0073208	21.8798	21.8798	21.8798	21.8798	21.8798	21.8798	21.8798	21.8798	0.421923	0	0	FALSE	CG14990
FBtr0073210;FBtr0073209	29.1097	29.7819	29.8316	28.2593	29.6172	29.7247	29.5095	29.1254	0.609307	0.235482	-0.24859	FALSE	Fit1
FBtr0073211	21.8798	24.5841	21.8798	21.8798	21.8798	21.8798	21.8798	21.8798	0.421923	0.353553	0.676074	FALSE	Ack
FBtr0073212	28.1659	27.7633	28.2306	27.2211	28.6929	28.5502	28.49	28.3159	0.125142	0.695307	-0.667014	FALSE	Ras64B
FBtr0073213	25.8265	22.5044	25.5522	25.7334	23.6318	23.46	23.8452	24.9097	0.421923	0.379966	0.94247	FALSE	Akh
FBtr0073215;FBtr0332658	27.2712	27.2637	27.3514	27.6484	27.7715	26.8485	27.8516	27.7122	0.604343	0.238629	-0.162264	FALSE	CG1299
FBtr0073217	26.1129	25.8199	26.2665	26.1597	26.2563	25.4361	26.266	26.5476	0.912607	0.0543135	-0.0367799	FALSE	Ero1L
FBtr0073218	21.8798	21.8798	21.8798	21.8798	25.5939	26.2204	26.1926	25.7918	7.52949e-06	0.931433	-4.06989	TRUE	CG18675
FBtr0073223	30.1574	29.4572	29.5388	30.4547	29.6014	29.5931	29.8954	29.0325	0.421923	0.420346	0.371445	FALSE	Cpr64Ad
FBtr0073226;FBtr0073225	29.2216	29.994	29.8522	29.0057	30.1512	30.1503	29.8882	29.9356	0.238053	0.601441	-0.51298	FALSE	CG14997
FBtr0073227	21.8798	21.8798	24.888	21.8798	21.8798	21.8798	22.9943	21.8798	0.6364	0.219147	0.473422	FALSE	pav
FBtr0073228	25.3158	25.3465	25.6181	21.8798	25.0079	25.4958	25.4961	25.0018	0.527764	0.286718	-0.710357	FALSE	CG1265
FBtr0073229	28.5085	29.0077	28.5887	28.2077	28.9273	29.3802	29.1526	29.1828	0.0906815	0.731913	-0.582534	FALSE	CG1309
FBtr0073231	21.8798	21.8798	21.8798	21.8798	21.8798	21.8798	21.8798	21.8798	0.421923	0	0	FALSE	CG1273
FBtr0073232;FBtr0333566	26.4811	27.0064	26.7686	25.9278	27.5542	27.6389	26.7562	26.8373	0.257399	0.588242	-0.650659	FALSE	CG1311
FBtr0073233	27.537	27.1888	27.7524	27.8708	28.2768	28.4351	28.3462	28.2054	0.0228501	0.826625	-0.728617	FALSE	CG1316
FBtr0073234;FBtr0300449	23.6812	21.8798	22.5908	24.6258	26.767	24.9508	24.6693	22.8942	0.352066	0.518556	-1.62596	FALSE	TfIIEbeta
FBtr0333567;FBtr0300774;FBtr0073237;FBtr0073235	27.5538	27.8535	27.4079	28.4559	26.4829	26.031	25.8714	24.8899	0.0185149	0.836663	1.99898	FALSE	Hexo1
FBtr0073242	28.5576	28.2115	28.2168	28.2632	23.8255	24.1345	21.8798	21.8798	0.00178686	0.900783	5.38239	TRUE	CG11583
FBtr0333568;FBtr0073243	21.8798	24.1892	23.5725	21.8798	24.1448	24.2269	23.9709	23.8298	0.26691	0.58166	-1.16277	FALSE	CG11586
FBtr0073247;FBtr0073246;FBtr0073245	21.8798	21.8798	21.8798	21.8798	21.8798	21.8798	21.8798	21.8798	0.421923	0	0	FALSE	ago
FBtr0333569;FBtr0073249;FBtr0073248;FBtr0073250	24.9656	26.6651	26.3876	26.5835	26.7899	26.4693	26.0224	22.7128	0.609307	0.235509	0.651864	FALSE	ImpL2
FBtr0073252	32.1308	32.3196	32.2821	31.3287	31.9658	31.2883	31.0093	30.9621	0.214881	0.618949	0.708907	FALSE	Cpr64Ac
FBtr0073253	28.0609	27.8321	28.0382	28.819	27.5394	27.9995	28.5517	27.516	0.482458	0.31528	0.285893	FALSE	Cpr64Ab
FBtr0073254	33.0002	32.9806	33.3108	32.8811	33.5784	33.1153	33.0472	32.7756	0.71958	0.169098	-0.085951	FALSE	Cpr64Aa
FBtr0073256	21.8798	21.8798	21.8798	21.8798	21.8798	22.9133	24.1563	25.0608	0.182643	0.644249	-1.62276	FALSE	VhaM9.7-c
FBtr0332659;FBtr0073260	21.8798	24.7427	22.805	24.4682	21.8798	21.8798	21.8798	21.8798	0.180881	0.645608	1.59414	FALSE	mas
FBtr0310632;FBtr0073263	30.395	31.3485	31.3421	29.7771	31.1272	31.098	30.7968	31.2615	0.472883	0.320904	-0.355223	FALSE	Rop
FBtr0073264	28.6399	28.8508	28.8867	30.0914	23.452	21.8798	23.4854	23.8697	0.000693112	0.91226	5.94547	TRUE	RfC4
FBtr0073270;FBtr0310531	32.2926	32.4226	32.1987	33.0708	32.3179	32.256	32.31	32.2548	0.421923	0.374369	0.211498	FALSE	Chd64
FBtr0073273;FBtr0073272;FBtr0073271;FBtr0302304	21.8798	21.8798	21.8798	21.8798	24.2517	21.8798	21.8798	23.8739	0.331627	0.537385	-1.09151	FALSE	CG14995
FBtr0332980;FBtr0073277;FBtr0073276;FBtr0073275	31.8911	32.1789	32.0721	31.6711	32.6931	32.3445	32.847	32.7619	0.0247642	0.822477	-0.708311	FALSE	Gad1
FBtr0073278	29.573	29.3104	29.5231	29.5959	30.1941	29.9973	30.1612	30.3402	0.00454793	0.883077	-0.672594	FALSE	Faa
FBtr0332981;FBtr0073281	21.8798	21.8798	21.8798	21.8798	26.2666	25.6219	25.7312	25.2301	5.53419e-05	0.926806	-3.83268	TRUE	Dpy-30L2
FBtr0310046;FBtr0309791;FBtr0073284;FBtr0073283	30.8863	30.5494	30.7351	29.8767	31.5012	31.2175	31.5505	31.704	0.0381216	0.798305	-0.981449	FALSE	CG11594
FBtr0346538;FBtr0073286	21.8798	21.8798	21.8798	21.8798	21.8798	21.8798	21.8798	21.8798	0.421923	0	0	FALSE	Claspin
FBtr0306092;FBtr0073287	26.2388	26.5949	26.2157	25.8527	27.4213	27.601	27.1037	27.9632	0.0119175	0.855073	-1.29676	FALSE	CG32250
FBtr0306093;FBtr0073288	30.0414	29.5075	29.5952	30.2413	28.9386	29.0436	29.025	28.7059	0.0202917	0.832189	0.918066	FALSE	mRpS6
FBtr0073293;FBtr0330179	21.8798	21.8798	21.8798	24.0064	21.8798	21.8798	21.8798	21.8798	0.421923	0.353553	0.531661	FALSE	Syx17
FBtr0113140;FBtr0073296;FBtr0073295;FBtr0073294;FBtr0308034;FBtr0308033;FBtr0113141;FBtr0073297	21.8798	21.8798	21.8798	21.8798	21.8798	21.8798	21.8798	21.8798	0.421923	0	0	FALSE	DOR
FBtr0073299	21.8798	21.8798	21.8798	21.8798	22.4826	22.0287	22.3074	21.8798	0.212249	0.620935	-0.294854	FALSE	nAChRbeta1
FBtr0333964;FBtr0290123;FBtr0073302	21.8798	21.8798	21.8798	21.8798	21.8798	21.8798	21.8798	21.8798	0.421923	0	0	FALSE	CG12607
FBtr0304987;FBtr0113143;FBtr0113142;FBtr0073310	21.8798	21.8798	21.8798	21.8798	21.8798	21.8798	21.8798	21.8798	0.421923	0	0	FALSE	CG11357
FBtr0073317	28.7821	29.0065	29.5161	28.8539	28.2698	27.4819	27.3477	28.2383	0.0358786	0.802436	1.20524	FALSE	Rpd3
FBtr0304990;FBtr0304989;FBtr0302594;FBtr0100508;FBtr0100507;FBtr0100505;FBtr0100504;FBtr0073321;FBtr0343995	25.7393	26.0735	25.99	25.7678	21.8798	24.7362	21.8798	25.7461	0.179809	0.646567	2.33217	FALSE	Src64B
FBtr0073322	21.8798	21.8798	21.8798	21.8798	21.8798	21.8798	21.8798	21.8798	0.421923	0	0	FALSE	CG32243
FBtr0073333	21.8798	21.8798	21.8798	21.8798	21.8798	21.8798	21.8798	21.8798	0.421923	0	0	FALSE	CG15022
FBtr0113139;FBtr0073335	21.8798	26.4465	25.9228	23.878	21.8798	21.8798	21.8798	21.8798	0.147395	0.673572	2.652	FALSE	CG15019
FBtr0073338	21.8798	21.8798	21.8798	21.8798	24.8573	21.8798	21.8798	21.8798	0.421923	0.353553	-0.744384	FALSE	CG11342
FBtr0073340	28.1907	28.0764	28.111	28.5219	23.7256	26.7601	26.6752	26.5472	0.0891545	0.733623	2.29797	FALSE	CG15014
FBtr0073343;FBtr0073342;FBtr0073341	21.8798	21.8798	21.8798	21.8798	21.8798	21.8798	21.8798	21.8798	0.421923	0	0	FALSE	dyl
FBtr0073348	26.9463	26.2496	28.0602	24.0724	25.9726	26.0953	27.6262	26.0145	0.93764	0.0389529	-0.095047	FALSE	Aats-leu
FBtr0332742;FBtr0073363	21.8798	21.8798	21.8798	21.8798	27.1989	26.7332	27.133	26.5172	3.52252e-06	0.932473	-5.01582	TRUE	CG12493
FBtr0073366	21.8798	21.8798	21.8798	21.8798	21.8798	25.1345	24.0996	21.8798	0.340827	0.527638	-1.36863	FALSE	CG18418
FBtr0073367	21.8798	21.8798	21.8798	21.8798	21.8798	21.8798	23.4515	24.1231	0.339436	0.529241	-0.953759	FALSE	CG7514
FBtr0309972;FBtr0073375	21.8798	21.8798	21.8798	21.8798	21.8798	21.8798	21.8798	21.8798	0.421923	0	0	FALSE	Con
FBtr0343639;FBtr0112977;FBtr0112976;FBtr0112975;FBtr0073376	26.8442	26.4219	24.4552	24.9041	28.4523	28.9052	27.8547	24.5123	0.384564	0.498066	-1.77476	FALSE	CG15211
FBtr0073378	21.8798	21.8798	21.8798	21.8798	21.8798	21.8798	21.8798	21.8798	0.421923	0	0	FALSE	CG15209
FBtr0073379	30.2181	29.9847	30.2712	30.2732	30.1901	30.1643	30.6165	30.6114	0.418047	0.477453	-0.208794	FALSE	CG17333
FBtr0332961;FBtr0073381	21.8798	21.8798	21.8798	21.8798	21.8798	21.8798	21.8798	21.8798	0.421923	0	0	FALSE	CG2186
FBtr0073386	26.095	25.9316	26.6182	23.2651	27.2799	27.0945	26.7763	26.7756	0.25941	0.586878	-1.50405	FALSE	v
FBtr0343591;FBtr0073387	29.5409	29.8962	30.1102	28.777	29.8598	29.5228	29.8068	29.5754	0.773868	0.136693	-0.110096	FALSE	CG2145
FBtr0073390;FBtr0331720;FBtr0073391	21.8798	21.8798	21.8798	21.8798	21.8798	21.8798	21.8798	21.8798	0.421923	0	0	FALSE	CG11160
FBtr0346297;FBtr0073392	21.8798	21.8798	22.8697	25.8703	21.8798	21.8798	21.8798	21.8798	0.421923	0.443334	1.24512	FALSE	CG15203
FBtr0073394	21.8798	21.8798	21.8798	21.8798	26.5298	23.9962	23.6471	23.4241	0.0605844	0.766375	-2.51952	FALSE	CG1537
FBtr0339768;FBtr0073403	25.4336	26.5527	25.5638	22.3472	24.4455	21.8798	22.6755	21.8798	0.23677	0.602393	2.25422	FALSE	CG1582
FBtr0346304;FBtr0073405;FBtr0073404;FBtr0343584	24.2395	21.8798	21.8798	24.7139	21.8798	21.8798	21.8798	21.8798	0.331781	0.537083	1.29848	FALSE	Ork1
FBtr0073406;FBtr0339836	21.8798	21.8798	21.8798	21.8798	21.8798	21.8798	21.8798	21.8798	0.421923	0	0	FALSE	CG1637
FBtr0073407	28.0208	28.7406	28.153	28.803	27.2913	27.6486	27.7415	27.79	0.0586842	0.768895	0.811503	FALSE	CG1637
FBtr0346382;FBtr0073408	22.7341	24.3947	26.2891	25.2795	23.8704	21.8798	21.8798	22.9622	0.194639	0.635323	2.0263	FALSE	CG1637
FBtr0073410	25.4207	21.8798	21.8798	26.5106	21.8798	21.8798	21.8798	21.8798	0.33358	0.533768	2.04293	FALSE	feo
FBtr0073411	24.4774	25.3704	26.3394	25.6331	24.6832	24.3145	25.2126	24.4638	0.303704	0.557971	0.786548	FALSE	sbr
FBtr0073412	23.7873	21.8798	21.8798	21.8798	21.8798	24.2416	21.8798	21.8798	0.908232	0.0570342	-0.113567	FALSE	CG32669
FBtr0346384;FBtr0073423;FBtr0073421;FBtr0073424;FBtr0073422	35.9066	36.0881	36.3781	35.3768	36.6108	36.4802	36.487	36.1643	0.21605	0.61793	-0.498171	FALSE	sesB
FBtr0333963;FBtr0073426;FBtr0073425	21.8798	21.8798	21.8798	21.8798	28.812	29.2775	29.0673	28.8777	8.68597e-08	0.93481	-7.12883	TRUE	Ant2
FBtr0346279;FBtr0073427	27.7633	27.9975	27.8976	28.3036	26.2471	26.3189	21.8798	21.8798	0.0920253	0.730508	3.90908	FALSE	Vago
FBtr0346280;FBtr0073428	26.6453	26.0867	26.1305	22.589	23.9398	24.6502	23.8364	24.4343	0.421923	0.412556	1.14768	FALSE	CG2076
FBtr0332383;FBtr0073431;FBtr0073429	23.251	25.921	25.2905	24.0009	26.2126	26.7703	25.8697	26.3541	0.132374	0.68823	-1.68583	FALSE	CG2061
FBtr0073435;FBtr0073434	33.7189	33.6288	33.4363	34.2052	33.2682	33.241	33.1291	33.3668	0.105396	0.715045	0.49597	FALSE	Hsp60
FBtr0346274;FBtr0073436	32.0421	32.3207	32.1141	32.7818	31.2362	31.2955	31.1652	31.3193	0.00730586	0.870698	1.06064	FALSE	Rpt3
FBtr0073437;FBtr0330387	21.8798	21.8798	21.8798	21.8798	21.8798	21.8798	21.8798	21.8798	0.421923	0	0	FALSE	CG18292
FBtr0307187;FBtr0073438	21.8798	21.8798	23.6541	22.6814	21.8798	21.8798	21.8798	21.8798	0.389283	0.495051	0.643973	FALSE	CG15202
FBtr0073439	28.0446	27.5249	27.5896	28.6234	28.2337	28.4713	28.8795	28.2499	0.331486	0.541477	-0.512973	FALSE	CG15201
FBtr0343038;FBtr0073440;FBtr0331741;FBtr0331740	21.8798	21.8798	21.8798	21.8798	21.8798	21.8798	21.8798	21.8798	0.421923	0	0	FALSE	Lint-1
FBtr0073443;FBtr0073441;FBtr0073444	29.1118	29.2662	28.7837	28.8721	28.4705	28.2379	28.5761	28.4322	0.0268251	0.818156	0.579255	FALSE	Dlic
FBtr0073448	23.6299	23.1193	24.1758	24.184	21.8798	21.8798	21.8798	21.8798	0.00356998	0.888586	1.89746	FALSE	CG1657
FBtr0073451	21.8798	21.8798	21.8798	21.8798	21.8798	21.8798	21.8798	21.8798	0.421923	0	0	FALSE	CG1738
FBtr0073452	25.1659	28.7932	29.1616	30.3093	28.9644	29.2354	22.3397	29.5414	0.745472	0.153323	0.837263	FALSE	CG11752
FBtr0340050;FBtr0340049;FBtr0073453	25.9137	26.0594	21.8798	26.8413	21.8798	21.8798	23.6743	25.8315	0.421923	0.431341	1.85723	FALSE	CG1737
FBtr0073454	21.8798	21.8798	21.8798	21.8798	21.8798	24.3347	24.0462	23.0727	0.137276	0.683383	-1.45356	FALSE	dsh
FBtr0073457	21.8798	23.9435	24.1636	21.8798	21.8798	21.8798	21.8798	21.8798	0.331486	0.539141	1.08688	FALSE	hop
FBtr0073460	25.3531	24.4751	22.2582	26.0755	21.8798	25.5127	23.5405	21.8798	0.421923	0.388287	1.33727	FALSE	l(1)10Bb
FBtr0073468	28.3171	28.5008	28.5459	27.2146	27.9936	28.3975	28.1666	28.5276	0.764232	0.142481	-0.126729	FALSE	antdh
FBtr0340165;FBtr0340164;FBtr0073472;FBtr0073471	32.5151	32.5316	32.4835	32.5042	31.4146	31.5565	31.5738	30.9972	0.00220135	0.897507	1.12305	FALSE	Ran
FBtr0073474	27.7759	24.2954	27.1453	28.0183	28.6743	28.0899	28.8105	28.2994	0.27984	0.573271	-1.6598	FALSE	ssp7
FBtr0346270;FBtr0073479;FBtr0073478;FBtr0073477;FBtr0073476;FBtr0073475	28.6903	28.9526	28.5998	29.0433	24.4981	26.0101	21.8798	25.3981	0.020268	0.832289	4.37496	FALSE	Klp10A
FBtr0073480	29.3862	29.5804	29.1033	29.3287	28.9999	29.1313	28.7863	28.7987	0.075689	0.748319	0.420553	FALSE	Gtp-bp
FBtr0343640;FBtr0073482	28.7296	28.8595	29.0417	29.4298	29.222	29.0504	29.2073	28.8486	0.761648	0.143961	-0.0669181	FALSE	Tim8
FBtr0333262;FBtr0073486;FBtr0308088;FBtr0333261;FBtr0301289;FBtr0073487;FBtr0073485;FBtr0308089;FBtr0073489	24.5848	22.9744	21.8798	22.851	22.8739	21.8798	23.9831	23.7305	0.962802	0.0230218	-0.0443303	FALSE	dlg1
FBtr0073494	24.1793	24.8463	23.8865	23.3504	22.7286	24.399	23.0268	21.2477	0.335995	0.531937	1.21511	FALSE	Gs2
FBtr0073499;FBtr0073500;FBtr0332619	21.8798	21.8798	21.8798	21.8798	21.8798	21.8798	21.8798	21.8798	0.421923	0	0	FALSE	HP5
FBtr0346268;FBtr0073503	24.1485	24.6558	23.2952	21.8798	24.8671	26.4024	21.8798	21.8798	0.873144	0.0779442	-0.262441	FALSE	Cyp4g15
FBtr0073505	29.3387	29.4318	29.2109	30.1045	28.8832	28.4166	27.0357	28.0831	0.0789436	0.744425	1.41683	FALSE	CG1749
FBtr0340294;FBtr0340293;FBtr0073506	29.9187	30.2574	29.6456	29.328	30.2656	30.4108	30.3877	30.6773	0.0979782	0.724628	-0.647933	FALSE	Spase25
FBtr0340296;FBtr0073509	21.8798	21.8798	21.8798	21.8798	21.8798	21.8798	21.8798	21.8798	0.421923	0	0	FALSE	PGRP-SA
FBtr0073510	21.8798	21.8798	23.2893	21.8798	21.8798	21.8798	21.8798	21.8798	0.421923	0.353553	0.352372	FALSE	CG11699
FBtr0073519;FBtr0073518	21.8798	24.3246	21.8798	21.8798	21.8798	23.2446	21.8798	21.8798	0.758911	0.145508	0.27	FALSE	rho-4
FBtr0343647;FBtr0073520	27.9758	28.3746	28.3991	28.078	23.5614	27.3038	23.7453	22.9272	0.0444358	0.78885	3.82244	FALSE	CG1703
FBtr0331406;FBtr0273235;FBtr0073522;FBtr0330394;FBtr0330393;FBtr0330392	21.8798	21.8798	21.8798	21.8798	21.8798	21.8798	21.8798	21.8798	0.421923	0	0	FALSE	Ptp10D
FBtr0334463;FBtr0073526;FBtr0334464;FBtr0073527;FBtr0334465	22.7665	22.0688	23.5518	23.0297	21.8798	24.3484	25.5049	23.3586	0.421923	0.385948	-0.918743	FALSE	bif
FBtr0346275;FBtr0073531	21.8798	21.8798	21.8798	21.8798	21.8798	21.8798	21.8798	21.8798	0.421923	0	0	FALSE	CG2444
FBtr0073533;FBtr0073534;FBtr0073532	21.8798	21.8798	21.8798	21.8798	21.8798	21.8798	21.8798	21.8798	0.421923	0	0	FALSE	CG2371
FBtr0343586;FBtr0073535	29.0718	29.3569	28.8222	29.0021	23.3998	25.9445	21.8798	25.2365	0.0133166	0.850539	4.94813	FALSE	RPA3
FBtr0306135;FBtr0306133;FBtr0073536;FBtr0306134	24.3948	23.1652	23.8745	21.8798	21.8798	21.8798	21.8798	21.8798	0.132492	0.688071	1.44876	FALSE	CG2247
FBtr0073539	28.3848	28.6235	29.0034	27.447	28.9037	28.9549	28.9657	28.8735	0.338419	0.530327	-0.559773	FALSE	CG1561
FBtr0073542	26.3351	26.882	27.6239	25.7505	24.1727	23.4993	24.3936	23.46	0.00883808	0.865293	2.76648	TRUE	RpII215
FBtr0339694;FBtr0339693;FBtr0073544;FBtr0073543	24.1753	21.8	21.8798	23.9095	21.8798	21.8798	21.8798	21.8798	0.343902	0.525358	1.06136	FALSE	CG1572
FBtr0332620;FBtr0300732;FBtr0073546;FBtr0300733;FBtr0073547	21.8798	21.8798	21.8798	21.8798	21.8798	21.8798	21.8798	21.8798	0.421923	0	0	FALSE	Evi5
FBtr0303335;FBtr0303334;FBtr0073551;FBtr0332954	31.5911	31.23	31.0741	32.3527	31.3115	31.2017	31.3492	31.1132	0.421923	0.382357	0.318083	FALSE	prtp
FBtr0332955;FBtr0073553;FBtr0073552	21.8798	21.8798	21.8798	21.8798	21.8798	21.8798	21.8798	21.8798	0.421923	0	0	FALSE	Tango10
FBtr0073555	21.8798	21.8798	21.8798	21.8798	21.8798	21.8798	21.8798	21.8798	0.421923	0	0	FALSE	m
FBtr0073562;FBtr0307896;FBtr0299569;FBtr0100540;FBtr0073561;FBtr0073560;FBtr0073558;FBtr0308085;FBtr0308084;FBtr0333204	29.7691	29.2926	29.9229	30.0233	28.9609	29.1312	29.4664	29.7403	0.310722	0.553727	0.427252	FALSE	CkIIbeta
FBtr0333016;FBtr0073565	24.8536	21.3392	21.8798	21.8798	24.822	25.8795	26.0549	26.1935	0.0466651	0.785588	-3.24938	FALSE	Cyp28c1
FBtr0073567;FBtr0330413	21.8798	21.8798	21.8798	21.8798	21.8798	21.8798	22.4675	22.7161	0.339156	0.529415	-0.356021	FALSE	CG1847
FBtr0331588;FBtr0073569	28.6861	28.5128	28.1685	28.2762	29.8085	29.0949	28.8721	30.0263	0.0628613	0.763412	-1.03957	FALSE	CG15739
FBtr0346165;FBtr0073572	29.1351	29.2909	29.2067	28.8076	28.5082	28.7131	28.9762	28.8355	0.16487	0.658411	0.351844	FALSE	sicily
FBtr0342742;FBtr0342743;FBtr0073573	23.6726	24.1903	24.6405	24.8833	21.8798	21.8798	21.8798	21.8798	0.00141836	0.904259	2.4669	TRUE	wisp
FBtr0073577;FBtr0073576;FBtr0073575;FBtr0073578	33.1949	33.0754	33.1483	32.9798	34.4849	34.2137	34.2583	34.1853	0.000166971	0.922057	-1.18597	FALSE	regucalcin
FBtr0342733;FBtr0073580	21.8798	21.8798	21.8798	21.8798	21.8798	21.8798	21.8798	21.8798	0.421923	0	0	FALSE	fw
FBtr0073581	24.2634	21.8798	23.7153	21.8798	28.1913	24.0081	23.4077	21.8798	0.437016	0.34373	-1.43714	FALSE	CG18130
FBtr0073591;FBtr0331748;FBtr0302182	25.7094	24.4399	25.3157	23.7978	23.519	24.8943	21.8798	21.8798	0.229036	0.608061	1.77246	FALSE	Sclp
FBtr0305609;FBtr0073595;FBtr0073594	26.3145	26.8429	26.6623	26.7027	25.9361	26.6955	26.4981	26.5236	0.421923	0.37993	0.217272	FALSE	pot
FBtr0342744;FBtr0073596	26.9184	27.5777	27.9544	25.153	23.2332	23.2388	23.1502	21.8798	0.0104356	0.859806	4.02541	FALSE	Upf1
FBtr0073601	29.0662	29.9683	29.4069	28.898	29.0254	29.3568	28.762	28.6258	0.421923	0.457219	0.392362	FALSE	CG2025
FBtr0073603;FBtr0073602	24.5098	25.9795	25.5621	22.7498	23.4527	25.17	21.8798	23.1709	0.421923	0.437804	1.28195	FALSE	CG10347
FBtr0334455;FBtr0073604	27.7752	27.9537	28.1973	27.5393	28.3121	28.743	28.5394	28.8175	0.0354698	0.803187	-0.736649	FALSE	p24-1
FBtr0345160;FBtr0339749;FBtr0073607	28.3221	28.3165	28.1971	27.7969	26.5005	22.4631	27.8335	27.3544	0.331486	0.538545	2.12028	FALSE	CG1578
FBtr0345166;FBtr0073611;FBtr0073610;FBtr0073609;FBtr0073608	34.543	34.2245	33.957	35.0182	33.8572	33.9447	33.9969	33.8798	0.199535	0.631265	0.515999	FALSE	Hsc70-3
FBtr0073612	26.5181	25.8181	25.6575	25.4748	25.6722	26.4482	26.2477	25.7526	0.659051	0.205241	-0.16305	FALSE	dy
FBtr0073613	28.9872	29.3992	29.154	29.0695	29.7303	29.8146	30.0519	30.2262	0.0113946	0.856648	-0.803264	FALSE	CG9360
FBtr0345164;FBtr0333797;FBtr0333796;FBtr0303339;FBtr0303338;FBtr0303337;FBtr0303336;FBtr0073619;FBtr0073618;FBtr0073617;FBtr0073616;FBtr0073615	29.3151	29.0743	28.7553	30.667	25.0071	21.8798	23.1528	21.8798	0.00327651	0.890419	6.47306	TRUE	Amun
FBtr0073620	21.8798	21.8798	21.8798	21.8798	21.8798	21.8798	21.8798	21.8798	0.421923	0	0	FALSE	FucT6
FBtr0073621	23.9565	30.9712	25.1308	31.6457	21.8798	24.5152	22.86	21.8798	0.155217	0.666406	5.14239	FALSE	CG15735
FBtr0073622	25.4523	24.4855	25.745	25.7827	23.6146	23.3524	24.6284	22.1554	0.0759759	0.747825	1.92868	FALSE	Tango4
FBtr0073623	21.8798	21.8798	21.8798	21.8798	21.8798	21.8798	21.8798	21.8798	0.421923	0	0	FALSE	Cyp318a1
FBtr0073640	22.6249	22.934	24.5814	21.8798	24.3904	23.1849	23.8238	25.9552	0.355049	0.516419	-1.33356	FALSE	Cyp311a1
FBtr0073641;FBtr0342732	30.1766	30.5124	30.4183	30.2272	29.419	29.6055	29.0074	29.1908	0.00540503	0.878994	1.02795	FALSE	Usp7
FBtr0339625;FBtr0073642	25.7408	26.4428	25.6765	21.8798	21.8798	21.8798	21.8798	21.8798	0.101256	0.720397	3.0552	FALSE	Chrac-16
FBtr0073650	21.8798	21.8798	21.8798	21.8798	21.8798	21.8798	21.8798	21.8798	0.421923	0	0	FALSE	Cpr11A
FBtr0073651	21.8833	22.8757	21.8798	21.8798	25.1674	21.8798	21.8798	21.8798	0.593931	0.245479	-0.572036	FALSE	Lsp1alpha
FBtr0073652	21.8798	21.8798	21.8798	21.8798	21.8798	21.8798	21.8798	21.8798	0.421923	0	0	FALSE	CG2556
FBtr0073653;FBtr0333157	22.2857	24.3482	23.1364	24.0182	21.8798	21.8798	21.8798	21.8798	0.0679229	0.757258	1.56734	FALSE	Cpr11B
FBtr0346308;FBtr0073655	21.8798	21.8798	21.8798	21.8798	21.8798	24.3788	21.8798	21.8798	0.421923	0.353553	-0.62476	FALSE	CG2543
FBtr0346381;FBtr0310434;FBtr0073657	21.8798	21.8798	21.8798	21.8798	21.8798	21.8798	21.8798	21.8798	0.421923	0	0	FALSE	CG1463
FBtr0073658	27.84	28.215	28.019	25.1262	28.9864	28.7404	27.9309	28.6054	0.344872	0.524594	-1.26571	FALSE	CG1824
FBtr0331718;FBtr0073662;FBtr0273245	21.8798	21.8798	21.8798	21.8798	21.8798	21.8798	21.8798	21.8798	0.421923	0	0	FALSE	CG11138
FBtr0073670	21.8798	21.8798	21.8798	21.8798	21.8798	21.8798	21.8798	21.8798	0.421923	0	0	FALSE	CG15731
FBtr0073675	22.9037	23.4585	21.8798	25.5543	21.8798	21.8798	21.8798	21.8798	0.244618	0.596373	1.5693	FALSE	CG2540
FBtr0307899;FBtr0300375;FBtr0073678;FBtr0307900;FBtr0307898;FBtr0340407;FBtr0340406	22.8407	25.59	25.8234	23.9264	23.0949	24.9068	23.6221	23.6649	0.471435	0.321853	0.722924	FALSE	Tomosyn
FBtr0345163;FBtr0345162;FBtr0340408;FBtr0300380;FBtr0073682;FBtr0073680	29.0294	28.4744	29.3832	28.4959	28.6344	28.8453	28.7202	29.16	0.985415	0.00888395	0.005785	FALSE	CkIalpha
FBtr0345165;FBtr0333756;FBtr0073683	21.8798	21.8798	21.8798	21.8798	21.8798	21.8798	21.8798	21.8798	0.421923	0	0	FALSE	Tis11
FBtr0305591;FBtr0073690	21.8798	21.8798	21.4539	21.8798	21.8798	22.6359	24.5695	23.5408	0.179796	0.646616	-1.38318	FALSE	CG3775
FBtr0343185;FBtr0073691	28.488	27.7233	28.5604	28.0534	23.3628	24.4176	21.8798	23.8459	0.00218466	0.897667	4.82974	TRUE	mRpL49
FBtr0346316;FBtr0343649;FBtr0073692	21.8798	22.5073	21.8798	25.7195	21.8798	24.6128	22.8226	23.0172	0.951224	0.0305621	-0.0865155	FALSE	CG4645
FBtr0073693	21.8798	21.8798	21.8798	21.8798	21.8798	21.8798	21.8798	21.8798	0.421923	0	0	FALSE	Brms1
FBtr0073694	21.8798	21.8798	21.8798	21.8798	21.8798	21.8798	21.8798	21.8798	0.421923	0	0	FALSE	CG4404
FBtr0073696;FBtr0073695	24.0401	26.0462	23.3142	24.2421	21.8798	21.8798	21.8798	23.3167	0.0819712	0.74118	2.17164	FALSE	CG4407
FBtr0073697	29.7811	29.8518	29.4668	29.1812	29.805	29.1523	29.4733	29.9869	0.912902	0.0541109	-0.0341286	FALSE	CG32649
FBtr0073705;FBtr0333799	32.2817	32.0663	32.3586	31.3671	32.6713	32.6573	32.8426	32.9457	0.0789405	0.744518	-0.760793	FALSE	ade5
FBtr0346122;FBtr0073709	23.5846	25.3255	24.1134	25.8257	21.8798	21.8798	21.8798	21.8798	0.0125942	0.853097	2.83252	FALSE	Aven
FBtr0333320;FBtr0333319;FBtr0308694;FBtr0306738;FBtr0113493;FBtr0073712	21.8798	21.8798	21.8798	21.8798	21.8798	21.8798	21.8798	21.8798	0.421923	0	0	FALSE	fne
FBtr0073720	29.6213	29.316	29.6579	29.5965	28.5968	29.2175	27.3711	26.9401	0.112221	0.708115	1.51656	FALSE	lic
FBtr0340301;FBtr0073721	31.2752	30.7549	31.2081	31.5784	30.6783	30.595	30.1752	30.9182	0.13204	0.688493	0.612453	FALSE	CG2200
FBtr0340302;FBtr0073722	24.2768	22.8829	24.578	25.0594	23.0208	23.5408	23.9808	24.1888	0.437554	0.343388	0.516484	FALSE	CG42237
FBtr0344608;FBtr0339676;FBtr0073723	29.0527	28.9384	29.5376	29.609	28.2962	28.9838	29.0133	28.767	0.208079	0.624155	0.519328	FALSE	CG15717
FBtr0073726	26.5302	26.8221	26.8269	27.103	21.8798	21.8798	21.8798	24.0253	0.00262368	0.894645	4.4044	TRUE	CG4332
FBtr0340299;FBtr0340298;FBtr0073727	27.8869	27.969	27.7691	27.8359	27.2968	27.4884	26.3213	27.6526	0.199416	0.631374	0.675445	FALSE	CG12096
FBtr0073729;FBtr0073728	21.8798	23.0345	21.8798	21.8798	21.8798	21.8798	21.8798	21.8798	0.421923	0.353553	0.288674	FALSE	CG32641;CG32640
FBtr0310646;FBtr0073730	31.5149	31.4649	31.487	31.6558	30.5436	30.2621	30.0714	30.3223	0.00049236	0.915148	1.2308	FALSE	REG
FBtr0073731;FBtr0310648;FBtr0330398;FBtr0073732;FBtr0310647;FBtr0340190	26.5255	26.631	26.6046	26.2743	21.8798	21.8798	21.8798	21.8798	1.80623e-07	0.934549	4.62907	TRUE	mew
FBtr0346125;FBtr0346124;FBtr0073737	27.4408	27.9323	27.5043	26.7992	27.5001	27.8474	26.6429	27.3141	0.832145	0.102518	0.0930453	FALSE	CG2453
FBtr0073738	21.8798	21.8798	21.8798	21.8798	21.8798	21.8798	21.8798	21.8798	0.421923	0	0	FALSE	CG12723
FBtr0073741	28.2199	27.4141	26.9716	28.6803	23.3037	23.7934	21.8798	21.8798	0.00241523	0.89601	5.1073	TRUE	Bap60
FBtr0340303;FBtr0330396;FBtr0073747;FBtr0330397;FBtr0073748	21.8798	21.8798	21.8798	21.8798	21.8798	21.8798	21.8798	21.8798	0.421923	0	0	FALSE	hep
FBtr0343602;FBtr0073750	21.8798	21.8798	21.8798	21.8798	21.8798	21.8798	21.8798	21.8798	0.421923	0	0	FALSE	CG12715
FBtr0333329;FBtr0073754	31.2503	31.2192	31.3776	30.0109	32.149	32.6737	31.3969	32.1501	0.124741	0.695756	-1.12791	FALSE	comt
FBtr0346123;FBtr0333330;FBtr0073755	21.8798	21.8798	21.8798	21.8798	21.8798	21.8798	21.8798	21.8798	0.421923	0	0	FALSE	CG15743
FBtr0073756	21.8798	21.8798	21.8798	21.8798	21.8798	23.2811	23.2073	21.8798	0.331486	0.539798	-0.682214	FALSE	CG15744
FBtr0073757	21.8798	23.2999	24.672	21.8798	21.8798	21.8798	21.8798	21.8798	0.371614	0.505493	1.05309	FALSE	CG1622
FBtr0345161;FBtr0339700;FBtr0339699;FBtr0073764;FBtr0073763	34.4507	34.2899	34.326	34.4446	33.5209	33.8085	33.5724	33.5027	0.00127851	0.905816	0.776666	FALSE	Jafrac1
FBtr0339837;FBtr0073774;FBtr0073773;FBtr0073772;FBtr0073771;FBtr0073770;FBtr0073769	33.7646	33.8151	33.7216	33.7854	34.2612	34.0903	34.3374	34.3403	0.00286643	0.89304	-0.485673	FALSE	CG1640
FBtr0343147;FBtr0073775	28.0868	27.8816	28.2701	29.0647	28.8124	28.6317	29.1504	29.0334	0.239321	0.60055	-0.581181	FALSE	Tim9a
FBtr0073777	27.9621	28.7607	27.2279	29.0605	25.9012	26.8169	27.4597	27.7384	0.207978	0.624253	1.27372	FALSE	CG1673
FBtr0073778	30.2471	30.6693	30.7225	30.6637	31.1595	31.4004	31.4324	31.603	0.0102353	0.86052	-0.823154	FALSE	GstT4
FBtr0301559;FBtr0073779	21.8798	21.8798	21.8798	21.8798	21.8798	21.8798	21.8798	21.8798	0.421923	0	0	FALSE	Set2
FBtr0073782	21.8798	21.8798	21.8798	21.8798	21.8798	21.8798	21.8798	21.8798	0.421923	0	0	FALSE	CG15754
FBtr0073783	21.8798	21.8798	21.8798	21.8798	21.8798	21.8798	21.8798	21.8798	0.421923	0	0	FALSE	CG15756
FBtr0073784	21.8798	21.8798	21.8798	21.8798	21.8798	21.8798	21.8798	21.8798	0.421923	0	0	FALSE	Cpr12A
FBtr0100168;FBtr0073789	24.6166	24.8462	23.9647	22.8696	21.8798	23.7262	21.8798	25.1472	0.421923	0.356126	0.916044	FALSE	Yippee
FBtr0339838;FBtr0073790;FBtr0304001	23.9579	22.5134	22.9861	22.6672	23.2797	24.1084	24.0875	21.8798	0.688614	0.187059	-0.307722	FALSE	Rbp1-like
FBtr0300828;FBtr0073795;FBtr0073794;FBtr0073793;FBtr0073792	31.618	31.771	31.5813	30.816	30.3886	30.1328	29.7223	29.987	0.0126048	0.852862	1.38891	FALSE	RpS15Aa
FBtr0339946;FBtr0073796	21.8798	21.8798	21.8798	21.8798	21.8798	24.8637	24.8917	24.349	0.10139	0.720079	-2.11627	FALSE	CG1764
FBtr0073799	21.8798	21.8798	21.8798	21.8798	21.8798	21.8798	21.8798	21.8798	0.421923	0	0	FALSE	CG32631
FBtr0310431;FBtr0073800	29.466	28.9086	27.757	30.1715	27.8331	28.0193	28.4128	28.6197	0.368345	0.507235	0.854585	FALSE	CG32633
FBtr0333723;FBtr0310432;FBtr0113443;FBtr0310433;FBtr0073803;FBtr0330399	25.5441	25.6667	22.6429	24.7307	25.4979	23.7508	22.7254	25.1901	0.767216	0.140821	0.355105	FALSE	Tango13
FBtr0073806	21.8798	21.8798	21.8798	21.8798	21.8798	21.8798	21.8798	21.8798	0.421923	0	0	FALSE	BthD
FBtr0340397;FBtr0073809	27.4943	26.8369	24.9751	27.8529	21.8798	21.8798	21.8798	24.0357	0.0145719	0.846872	4.37104	FALSE	CG11164
FBtr0073811	21.8798	21.8798	21.8798	21.8798	21.8798	21.8798	21.8798	21.8798	0.421923	0	0	FALSE	CG11162
FBtr0073812	27.7409	27.3922	27.9903	25.518	27.0478	28.0225	27.1986	27.5997	0.68255	0.190509	-0.306818	FALSE	CG11158
FBtr0073817	24.7317	23.642	21.8798	26.2947	21.8798	21.8798	21.8798	21.8798	0.164575	0.658876	2.25727	FALSE	mus101
FBtr0331708;FBtr0073818	29.3359	29.4041	29.5365	29.1388	29.4375	29.2181	29.2428	29.1341	0.46417	0.326566	0.0956551	FALSE	CG11134
FBtr0331719;FBtr0073819	31.1196	30.4758	30.3796	32.0386	31.9683	32.1803	32.5189	32.319	0.087695	0.735137	-1.24325	FALSE	CG11151
FBtr0073820	21.8798	21.8798	21.8798	21.8798	21.8798	21.8798	21.8798	21.8798	0.421923	0	0	FALSE	Rtc1
FBtr0346090;FBtr0073821	37.3986	37.0354	37.0495	37.9052	29.0359	28.9167	29.6585	31.9038	0.000878521	0.910128	7.46847	TRUE	Yp3
FBtr0301534;FBtr0301532;FBtr0301533;FBtr0073823;FBtr0100195;FBtr0100194;FBtr0073822;FBtr0301535;FBtr0331716;FBtr0340289;FBtr0331717	26.341	27.3511	27.0378	25.236	26.442	28.2063	26.7571	26.3139	0.582918	0.251962	-0.43836	FALSE	rdgB
FBtr0073827	25.1295	21.8798	23.3825	24.2365	26.0513	26.6595	26.2162	25.9122	0.0556101	0.772966	-2.55275	FALSE	CG11095
FBtr0073828	26.5485	27.736	27.733	25.8854	24.3179	26.32	24.6568	24.431	0.0871642	0.735717	2.0443	FALSE	Nup93-1
FBtr0340292;FBtr0303418;FBtr0303419;FBtr0073834	21.8798	21.8798	21.8798	21.8798	21.8798	21.8798	21.8798	21.8798	0.421923	0	0	FALSE	jub
FBtr0346089;FBtr0073835	30.4414	30.7005	30.3792	30.1574	30.5892	30.724	30.6713	30.7087	0.20857	0.623843	-0.253679	FALSE	Clic
FBtr0346091;FBtr0073838	31.3994	31.215	31.2941	31.9374	31.3963	31.0237	31.2731	31.2048	0.421923	0.441635	0.237033	FALSE	CtsB1
FBtr0331712;FBtr0331711;FBtr0112981;FBtr0073840	30.5582	30.633	30.3519	31.188	28.2261	26.8856	26.3012	27.5481	0.00327651	0.8904	3.44251	TRUE	Pdcd4
FBtr0073841	26.0262	25.3492	25.4567	24.8321	21.8798	21.8798	21.8798	21.8798	0.000162381	0.922245	3.53628	TRUE	Grip91
FBtr0073842;FBtr0331709;FBtr0331710	25.3695	24.5073	22.8487	24.9161	25.584	26.6525	23.664	24.6605	0.487619	0.311892	-0.729847	FALSE	g
FBtr0343352;FBtr0073845;FBtr0073844	27.1591	27.2944	27.2722	26.3199	27.0089	26.4635	27.3949	27.7479	0.752997	0.149069	-0.142416	FALSE	CG9940
FBtr0346119;FBtr0340399;FBtr0073846	27.6549	28.1744	27.7537	22.8042	27.3243	27.5349	26.9055	26.908	0.721503	0.167856	-0.571406	FALSE	CG12177
FBtr0340191;FBtr0073848	24.899	25.6452	24.4812	22.9427	22.2784	21.8798	22.3428	23.3264	0.0853641	0.737858	2.03519	FALSE	CG2691
FBtr0346118;FBtr0073849	21.8798	21.8798	21.8798	21.8798	21.8798	21.8798	21.8798	21.8798	0.421923	0	0	FALSE	tth
FBtr0073850	21.8798	21.8798	21.8798	21.8798	21.8798	21.8798	21.8798	21.8798	0.421923	0	0	FALSE	Ndc80
FBtr0332844;FBtr0332843;FBtr0307296;FBtr0300566;FBtr0073855	31.1305	30.7858	31.1223	31.0396	29.939	30.1025	30.3499	30.1288	0.0032618	0.890535	0.889475	FALSE	ben
FBtr0304579;FBtr0073868	21.8798	21.8798	21.8798	21.8798	21.8798	21.8798	21.8798	21.8798	0.421923	0	0	FALSE	CG12480
FBtr0073894	21.8798	21.8798	21.8798	21.8798	21.8798	21.8798	21.8798	21.8798	0.421923	0	0	FALSE	CG32603
FBtr0073898;FBtr0073897	31.507	32.4137	31.9968	32.1052	21.8798	21.8798	21.8798	21.8798	2.39428e-07	0.934446	10.1259	TRUE	yl
FBtr0073899	21.8798	21.8798	21.8798	21.8798	21.8798	21.8798	24.0254	21.8798	0.421923	0.353553	-0.536413	FALSE	CG11590
FBtr0073900	26.0922	24.2834	26.4815	25.4806	21.8798	21.8798	24.0596	24.0922	0.0747897	0.749287	2.6066	FALSE	l(1)G0007
FBtr0073902	29.5748	29.154	29.1996	29.5125	28.4607	27.9676	27.3684	28.2379	0.0146251	0.846662	1.35154	FALSE	mRpL38
FBtr0339437;FBtr0073903	21.8798	24.6813	21.8798	21.8798	21.8798	21.8798	21.8798	21.8798	0.421923	0.353553	0.700385	FALSE	CG1434
FBtr0339497;FBtr0073908	26.7317	27.3937	27.4443	27.5944	27.3139	27.6412	27.4257	27.7739	0.421923	0.394171	-0.247634	FALSE	CG1461
FBtr0073916	21.8798	21.8798	21.8798	21.8798	21.8798	21.8798	21.8798	21.8798	0.421923	0	0	FALSE	CG9411
FBtr0073922	27.4696	27.4622	24.9251	28.9728	21.8798	21.8798	21.8798	21.8798	0.0068673	0.872652	5.32764	TRUE	mRNA-cap
FBtr0073926	27.7347	27.0266	26.8731	28.5552	21.8798	21.8798	21.8798	21.8798	0.000147761	0.922744	5.66764	TRUE	CG11674
FBtr0333429;FBtr0073927;FBtr0333428	21.8798	21.8798	21.8798	21.8798	24.1357	23.4302	23.9263	24.9557	0.0045253	0.883259	-2.2322	TRUE	l(1)G0469
FBtr0073933	23.4252	21.8798	22.7635	21.8798	21.8798	21.8798	21.8798	22.7366	0.465787	0.325392	0.393068	FALSE	nmdyn-D6
FBtr0333658;FBtr0305582;FBtr0073937	24.401	21.8798	23.233	21.8798	21.8798	24.0194	21.8798	21.8798	0.667313	0.199809	0.433689	FALSE	Ag5r
FBtr0073938	21.8798	21.8798	21.8798	21.8798	21.8798	21.8798	21.8798	21.8798	0.421923	0	0	FALSE	Ag5r2
FBtr0339769;FBtr0073939	23.4744	21.8798	23.5633	25.1866	21.8798	21.8798	21.8798	21.8798	0.163203	0.659877	1.64625	FALSE	CG15890
FBtr0073945	29.5743	29.5269	29.538	29.505	28.7947	28.7898	27.5995	28.2184	0.0336238	0.806087	1.18544	FALSE	mRpS25
FBtr0300433;FBtr0300432;FBtr0073947;FBtr0073946	24.4395	22.6004	22.7216	27.0497	26.25	22.5477	23.8537	24.507	0.959106	0.0256493	-0.0868233	FALSE	CG14411
FBtr0073952;FBtr0073950;FBtr0330217;FBtr0347266;FBtr0330214;FBtr0330216;FBtr0073951;FBtr0073949;FBtr0330215;FBtr0300434;FBtr0300435;FBtr0073954	29.2059	29.3621	29.5219	28.4115	29.3459	29.2944	29.7968	29.5556	0.421923	0.457022	-0.372827	FALSE	Flo2
FBtr0073956;FBtr0310270;FBtr0073957	21.8798	21.8798	21.8798	21.8798	21.8798	21.8798	21.8798	21.8798	0.421923	0	0	FALSE	be
FBtr0073959;FBtr0073958	21.8798	21.8798	21.8798	21.8798	21.8798	21.8798	21.8798	21.8798	0.421923	0	0	FALSE	CG5541
FBtr0340425;FBtr0340424;FBtr0073960	31.3165	31.7146	31.6627	31.7304	30.984	31.3657	31.6172	32.0207	0.715026	0.171691	0.109148	FALSE	CG5548
FBtr0073964	29.6899	29.5916	29.4438	29.8437	29.025	29.2724	29.3851	29.3403	0.0711927	0.753064	0.386518	FALSE	CG5599
FBtr0073965	21.8798	21.8798	21.8798	26.3768	21.8798	21.8798	21.8798	21.8798	0.421923	0.353553	1.12426	FALSE	CG15027
FBtr0073967	23.5636	23.72	28.7184	28.7587	22.3507	24.359	24.2327	24.2526	0.383526	0.498759	2.39145	FALSE	Lsd-2
FBtr0340429;FBtr0073968	25.7221	26.0683	25.9552	24.4973	21.8798	24.6287	24.0002	24.3827	0.14797	0.672884	1.83789	FALSE	opm
FBtr0343521;FBtr0308838;FBtr0303294;FBtr0073972	31.114	31.0699	31.3792	30.8345	31.8345	31.7923	31.6058	31.8413	0.0131878	0.85109	-0.669086	FALSE	pdgy
FBtr0343378;FBtr0073973	21.8798	21.8798	21.8798	21.8798	22.955	23.066	21.8798	23.1706	0.100491	0.721384	-0.888066	FALSE	CG32591
FBtr0073974	21.8798	21.8798	21.8798	21.8798	21.8798	21.8798	21.8798	21.8798	0.421923	0	0	FALSE	CG9503
FBtr0073976	28.2091	28.2114	28.1999	27.7184	21.8798	21.8798	21.8798	21.8798	3.10026e-07	0.934329	6.20493	TRUE	CG12398
FBtr0343380;FBtr0073978	30.7611	30.8206	30.9423	29.6813	31.3246	31.1095	30.8482	31.2952	0.280023	0.573092	-0.593029	FALSE	CG9509
FBtr0343381;FBtr0073979	32.1071	31.7869	31.9229	31.1992	32.9699	32.8195	32.8495	32.9963	0.0102559	0.860441	-1.15476	FALSE	CG9512
FBtr0073980	21.8798	21.8798	21.8798	21.8798	23.4632	23.9141	26.4331	26.2323	0.0363534	0.801286	-3.1309	FALSE	CG9514
FBtr0073985	21.8798	21.8798	21.8798	21.8798	21.8798	21.8798	21.8798	21.8798	0.421923	0	0	FALSE	CG9521
FBtr0073986	21.8798	21.8798	21.8798	21.8798	21.8798	21.8798	21.8798	21.8798	0.421923	0	0	FALSE	CG9522
FBtr0073988	21.8798	21.8798	21.8798	21.8798	21.8798	21.8798	21.8798	21.8798	0.421923	0	0	FALSE	CG32590
FBtr0073989	29.4269	30.1991	29.5199	29.9261	29.5849	29.1902	29.425	29.667	0.421499	0.475452	0.301232	FALSE	CG14407
FBtr0333656;FBtr0333657;FBtr0305581;FBtr0333654;FBtr0340467;FBtr0333655;FBtr0073992	21.8798	21.8798	21.8798	21.8798	21.8798	21.8798	21.8798	21.8798	0.421923	0	0	FALSE	rut
FBtr0340433;FBtr0074001;FBtr0074002	21.8798	21.8798	21.8798	21.8798	21.8798	23.7621	24.6391	23.5592	0.122831	0.697492	-1.58025	FALSE	CG5877
FBtr0308699;FBtr0100294;FBtr0074005;FBtr0074006;FBtr0340434	26.2261	26.4235	21.8798	24.3379	21.8798	21.8798	21.8798	21.8798	0.129137	0.691221	2.83704	FALSE	Top1
FBtr0330404;FBtr0074007	21.8798	21.8798	21.8798	21.8798	21.8798	21.8798	21.8798	21.8798	0.421923	0	0	FALSE	dah
FBtr0307383;FBtr0074008;FBtr0074010;FBtr0074009;FBtr0330405;FBtr0307384;FBtr0301774	29.673	29.461	30.3122	29.0802	30.0956	29.8265	29.3489	29.6892	0.774788	0.136089	-0.10844	FALSE	HDAC6
FBtr0074011	30.8526	29.9662	30.7102	30.7079	30.2623	30.277	23.1741	23.5827	0.289421	0.566953	3.73523	FALSE	CG6227
FBtr0074017	21.8798	21.8798	21.8798	21.8798	23.6805	23.5919	21.9236	23.6708	0.0889834	0.733798	-1.33692	FALSE	Pp1-13C
FBtr0074018	27.6231	27.79	27.6518	25.9117	24.308	21.8798	23.4287	21.8798	0.00958515	0.862563	4.3701	TRUE	CG12608
FBtr0074020	21.8798	21.8798	21.8798	21.8798	21.8798	21.8798	21.8798	21.8798	0.421923	0	0	FALSE	CG9114
FBtr0330403;FBtr0074027	29.5477	29.0959	29.4688	29.9198	28.7029	28.365	28.9649	28.5398	0.0359099	0.802299	0.864926	FALSE	RpL37a
FBtr0074028	21.8798	21.8798	21.8798	21.8798	21.8798	21.8798	21.8798	21.8798	0.421923	0	0	FALSE	Cyp4s3
FBtr0346181;FBtr0074030;FBtr0332590	32.7659	32.753	32.641	32.8504	32.059	32.2672	32.3441	32.2656	0.00474183	0.882062	0.518596	FALSE	Ahcy13
FBtr0345130;FBtr0343984;FBtr0343983;FBtr0074033;FBtr0074032	26.9109	27.798	26.8876	26.7191	26.4782	27.291	26.8957	27.0437	0.681932	0.190864	0.151724	FALSE	CG6299
FBtr0074036	21.8798	21.8798	21.8798	21.8798	21.8798	21.8798	21.8798	21.8798	0.421923	0	0	FALSE	CG6308
FBtr0074039	21.8798	21.8798	21.8798	21.8798	21.8798	21.8798	21.8798	21.8798	0.421923	0	0	FALSE	CG6340
FBtr0074042;FBtr0343525;FBtr0074043	21.8798	21.8798	21.8798	21.8798	21.8798	21.8798	21.8798	21.8798	0.421923	0	0	FALSE	Gmap
FBtr0339691;FBtr0074045	27.3888	27.1913	27.9838	27.8536	29.1407	28.1907	28.7469	28.5249	0.0453177	0.787509	-1.04643	FALSE	CG7860
FBtr0074046	21.8798	21.8798	21.8798	21.8798	23.3752	21.8798	23.4203	21.8798	0.331486	0.539982	-0.758996	FALSE	CG7872
FBtr0340344;FBtr0074047	26.7966	22.4982	21.8181	21.8798	21.8798	24.9389	21.7344	23.6654	0.916506	0.0520537	0.193544	FALSE	CG8097
FBtr0343332;FBtr0074053	30.6743	30.3515	30.6324	29.939	30.3335	30.5965	30.7417	30.6001	0.475285	0.319395	-0.168655	FALSE	CG8128
FBtr0340308;FBtr0074057;FBtr0074056	30.8966	30.903	30.9057	31.0271	29.2889	29.3966	29.2169	29.0932	1.2978e-05	0.930465	1.68418	FALSE	CG9281
FBtr0074058	24.3817	25.0881	23.747	24.1137	24.1759	22.6941	22.3924	22.9893	0.135986	0.684684	1.26969	FALSE	Pis
FBtr0340346;FBtr0331760;FBtr0074063	21.8798	21.8798	21.8798	21.8798	21.8798	21.8798	21.8798	21.8798	0.421923	0	0	FALSE	sog
FBtr0340348;FBtr0074071	21.8798	21.8798	21.8798	21.8798	21.8798	21.8798	21.8798	21.8798	0.421923	0	0	FALSE	CG9213
FBtr0074074	21.8798	21.8798	21.8798	21.8798	21.8798	21.8798	21.8798	21.8798	0.421923	0	0	FALSE	CG9203
FBtr0074075	21.8798	21.8798	21.8798	21.8798	21.8798	21.8798	21.8798	21.8798	0.421923	0	0	FALSE	Grip128
FBtr0074077	21.8798	21.8798	22.9626	21.8798	21.8798	21.8798	21.8798	21.8798	0.421923	0.353553	0.270698	FALSE	shtd
FBtr0332591;FBtr0074079	21.8798	21.8798	21.8798	21.8798	21.8798	24.9225	21.8798	23.9868	0.34011	0.528554	-1.28746	FALSE	Scamp
FBtr0074084;FBtr0332613	28.3271	28.6822	28.695	27.8774	28.5579	28.9486	28.1293	28.438	0.701095	0.179764	-0.123031	FALSE	l(1)G0136
FBtr0074086	33.3153	33.1902	33.2252	33.5299	31.8708	32.081	31.6114	31.9275	0.000483008	0.915345	1.44248	FALSE	Tcp-1zeta
FBtr0346188;FBtr0074087	27.5895	27.7203	27.3754	26.9788	26.6414	27.2291	24.4055	24.0921	0.194176	0.635669	1.82398	FALSE	CG8239
FBtr0074090	30.1357	29.9684	29.7792	30.1363	29.0661	29.1038	28.6931	28.7185	0.00266809	0.894323	1.1095	FALSE	mRpL3
FBtr0346193;FBtr0074094	30.6176	30.2983	30.1762	31.2355	28.9624	29.489	29.4623	29.1654	0.0185942	0.836356	1.31212	FALSE	mRpS30
FBtr0346189;FBtr0340116;FBtr0074104	24.1796	23.176	24.2593	26.0123	21.8798	21.8798	21.8798	22.3564	0.0382877	0.798025	2.40787	FALSE	CG8578
FBtr0346794;FBtr0331597;FBtr0074111;FBtr0074110;FBtr0074108;FBtr0074107;FBtr0074106	31.5643	31.8227	31.8118	31.3451	31.9403	31.7198	31.8279	31.8214	0.375669	0.50322	-0.191369	FALSE	Gbeta13F
FBtr0332618;FBtr0074112	33.938	34.0984	34.3408	33.8343	33.995	34.2054	33.8678	33.7863	0.617368	0.230669	0.0892292	FALSE	Gapdh2
FBtr0340041;FBtr0300801;FBtr0074116;FBtr0074115;FBtr0074114	21.8798	21.8798	21.8798	21.8798	21.8798	21.8798	21.8798	21.8798	0.421923	0	0	FALSE	CG16952
FBtr0074117	21.8798	21.8798	21.8798	21.8798	21.8798	21.8798	21.8798	21.8798	0.421923	0	0	FALSE	CG15916
FBtr0074130	21.8798	21.8798	21.8798	21.8798	21.8798	21.8798	21.8798	21.8798	0.421923	0	0	FALSE	CG8924
FBtr0342745;FBtr0074132	21.8798	21.8798	21.8798	21.8798	21.8798	21.8798	21.8798	21.8798	0.421923	0	0	FALSE	Rrp47
FBtr0074134	24.1007	25.2928	21.968	21.8798	25.1424	22.956	24.6153	25.3198	0.421923	0.412581	-1.19803	FALSE	CG8931
FBtr0333323;FBtr0333322;FBtr0074137;FBtr0074135	21.8798	21.8798	21.8798	21.8798	21.8798	21.8798	21.8798	21.8798	0.421923	0	0	FALSE	exd
FBtr0074138	26.9392	26.9799	26.5942	27.0901	21.8798	21.8798	21.8798	21.8798	4.47489e-07	0.934141	5.02108	TRUE	CG8939
FBtr0340416;FBtr0340415;FBtr0074143;FBtr0074142;FBtr0074141;FBtr0074140	27.5686	27.6129	21.8798	21.8798	21.8798	25.1526	21.8798	21.8798	0.421923	0.3852	2.03726	FALSE	vap
FBtr0074150;FBtr0074149;FBtr0074148;FBtr0074147;FBtr0074146;FBtr0074145;FBtr0074144	30.4002	30.1801	30.2199	30.8202	28.7262	28.9615	28.7205	29.035	0.00142726	0.904152	1.54425	FALSE	eIF5
FBtr0340417;FBtr0074152;FBtr0074151	30.7933	31.1586	31.362	30.3949	31.8923	31.5251	30.8343	31.7216	0.311096	0.553415	-0.566158	FALSE	CG9172
FBtr0074159;FBtr0303567	28.4748	28.5461	28.2783	29.2413	27.7277	28.223	28.454	28.2803	0.318745	0.548907	0.463913	FALSE	Stim
FBtr0303645;FBtr0303646;FBtr0340311;FBtr0074162;FBtr0303647;FBtr0303648	28.0196	27.9332	26.5164	27.1138	22.4012	24.4407	28.6497	26.0552	0.411224	0.481197	2.00904	FALSE	Ranbp16
FBtr0333719;FBtr0301598;FBtr0074166	30.3785	30.2871	30.716	30.8445	31.1059	31.2527	30.7146	31.0044	0.134425	0.686265	-0.462885	FALSE	MSBP
FBtr0074168	21.8798	21.8798	21.8798	21.8798	21.8798	21.8798	21.8798	21.8798	0.421923	0	0	FALSE	AlkB
FBtr0074173;FBtr0074171;FBtr0074170;FBtr0074169	21.8798	21.8798	21.8798	21.8798	21.8798	23.1648	21.8798	21.8798	0.421923	0.353553	-0.321246	FALSE	Myb
FBtr0300787;FBtr0074175;FBtr0074174	21.8798	21.8798	21.8798	21.8798	21.8798	21.8798	21.8798	21.8798	0.421923	0	0	FALSE	UBL3
FBtr0074177	31.2199	30.9193	31.1854	31.105	31.6631	31.2787	30.246	30.8486	0.802605	0.119563	0.0982565	FALSE	sun
FBtr0074178	30.6407	30.3805	30.6264	30.4401	28.9218	29.0293	28.0737	29.5497	0.0146914	0.846419	1.6283	FALSE	Aats-arg
FBtr0339445;FBtr0112798;FBtr0112797;FBtr0074182;FBtr0074181;FBtr0074180;FBtr0074179	33.0109	33.5568	33.6541	32.2261	33.6146	33.4744	33.2181	33.1201	0.571705	0.2591	-0.244795	FALSE	Chc
FBtr0074189;FBtr0074188;FBtr0074187;FBtr0074186;FBtr0074185;FBtr0113439;FBtr0074184	21.8798	21.8798	21.8798	21.8798	21.8798	21.8798	21.8798	21.8798	0.421923	0	0	FALSE	CG8974;CG32581
FBtr0074191;FBtr0074190	30.2087	29.5384	29.3946	30.2959	28.0749	27.9441	27.9346	28.2484	0.00345213	0.889308	1.80891	FALSE	Paf-AHalpha
FBtr0074192	21.8798	21.8798	21.8798	21.8798	27.8654	28.137	28.6901	28.414	1.60793e-06	0.933259	-6.39685	TRUE	Efhc1.1
FBtr0074193	21.8798	21.8798	21.8798	21.8798	21.8798	21.8798	24.5287	23.4516	0.352802	0.518037	-1.05519	FALSE	CG8952
FBtr0074201	21.8798	21.8798	21.8798	21.8798	21.8798	21.8798	21.8798	21.8798	0.421923	0	0	FALSE	CG8944
FBtr0074202	26.5481	21.7548	26.5051	25.9609	27.1114	26.6783	23.2204	26.2232	0.73539	0.159676	-0.616085	FALSE	CG11679
FBtr0074203	21.8798	21.8798	21.8798	21.8798	21.8798	21.8798	21.8798	21.8798	0.421923	0	0	FALSE	Arp6
FBtr0340442;FBtr0074209	31.4975	31.5443	31.4549	30.9484	32.4925	32.8147	32.3886	32.6275	0.00379315	0.887088	-1.21955	FALSE	Mfe2
FBtr0074210	32.2149	31.8413	31.8235	32.3767	31.7306	31.8017	32.0829	31.8413	0.421923	0.430274	0.199994	FALSE	Prosalpha4
FBtr0343519;FBtr0308619;FBtr0074214;FBtr0074212;FBtr0074211	28.1828	27.9005	27.4994	27.7856	27.7936	28.0393	26.4788	27.1299	0.421923	0.431277	0.481685	FALSE	eas
FBtr0074216	34.2445	34.3774	34.3719	34.1774	34.5232	34.4809	34.241	34.4043	0.396432	0.490224	-0.119556	FALSE	CG3560
FBtr0074217;FBtr0334991;FBtr0334990	23.3442	22.7447	23.5966	23.0168	21.8798	21.8798	21.8798	21.8798	0.00471036	0.882296	1.29583	FALSE	caz
FBtr0336977;FBtr0074222	21.8798	21.8798	21.8798	21.8798	21.8798	21.8798	21.8798	21.8798	0.421923	0	0	FALSE	CG3679
FBtr0074226	24.6399	23.6948	21.8798	23.9703	21.8798	21.8798	21.8798	21.8798	0.11357	0.706756	1.66644	FALSE	CalpC
FBtr0074230	21.8798	21.8798	21.8798	21.8798	21.8798	21.8798	21.8798	21.8798	0.421923	0	0	FALSE	sl
FBtr0340313;FBtr0074232;FBtr0100586;FBtr0074233	29.7167	29.4914	28.7329	30.2593	27.9717	27.0777	27.1147	27.3	0.010076	0.861027	2.18408	FALSE	nonA
FBtr0331756;FBtr0074237	28.0698	28.0514	27.4816	29.4239	28.393	27.6831	28.1589	28.0558	0.737987	0.1581	0.183985	FALSE	CG9917
FBtr0074238	33.9353	33.7577	34.2631	33.5718	33.5796	33.2368	33.0885	33.541	0.121725	0.698613	0.520516	FALSE	Cyp1
FBtr0346059;FBtr0074240	33.0357	33.0244	32.9563	31.9799	34.0842	34.0357	34.2655	34.5446	0.0141228	0.848189	-1.48342	FALSE	CG9914
FBtr0074244;FBtr0074243;FBtr0074242;FBtr0074241	31.5816	31.048	31.1749	31.9993	30.7684	31.1675	30.8655	30.816	0.179847	0.646503	0.546623	FALSE	CG9911
FBtr0074245;FBtr0100556	21.8798	21.8798	21.8798	21.8798	23.7886	24.6453	21.9209	21.8798	0.333404	0.534467	-1.17886	FALSE	CG32576
FBtr0074247;FBtr0074246;FBtr0340443	21.8798	21.8798	24.3738	21.8798	21.8798	21.8798	21.8798	21.8798	0.421923	0.353553	0.623506	FALSE	kat80
FBtr0343595;FBtr0074259;FBtr0074258;FBtr0074257	31.3308	31.5626	31.5858	31.0223	31.5814	31.7296	31.5197	31.8979	0.260708	0.585987	-0.306722	FALSE	Nipsnap
FBtr0301301;FBtr0074267;FBtr0074266;FBtr0074264;FBtr0074262;FBtr0074265;FBtr0074263;FBtr0074261	26.9216	26.5263	23.7984	26.7176	21.8798	21.8798	21.8798	21.8798	0.0113551	0.856796	4.1112	FALSE	Fur2
FBtr0340314;FBtr0074270;FBtr0074269;FBtr0074268	27.7923	28.8565	28.8321	27.7895	29.3081	28.7679	29.9485	29.1612	0.152846	0.668742	-0.978817	FALSE	CG4239
FBtr0074271	21.8798	21.8798	21.8798	21.8798	21.8798	21.8798	21.8798	21.8798	0.421923	0	0	FALSE	mei-41
FBtr0074275;FBtr0334037;FBtr0334036;FBtr0308607;FBtr0308606;FBtr0074274;FBtr0074273	21.8798	21.8798	21.8798	21.8798	21.8798	21.8798	21.8798	21.8798	0.421923	0	0	FALSE	Traf-like
FBtr0343349;FBtr0074278	29.3871	29.7179	29.2784	29.7066	27.4311	28.7285	28.862	28.8375	0.104817	0.715706	1.05775	FALSE	rngo
FBtr0074281;FBtr0343632;FBtr0074279;FBtr0343633;FBtr0074280	30.3997	30.3028	30.2281	31.2301	29.5622	29.7748	30.066	29.4671	0.0912618	0.731301	0.822687	FALSE	Rbp2
FBtr0340157;FBtr0074283	28.8439	28.2787	28.1992	29.2294	28.1679	28.5543	27.6567	28.1441	0.34469	0.524779	0.507037	FALSE	Ubc7
FBtr0299587;FBtr0074284;FBtr0340158	24.8628	26.4125	27.0354	28.6167	21.8798	21.8798	21.8798	21.8798	0.00727113	0.870854	4.85206	TRUE	Nup153
FBtr0074285	27.1439	24.1846	23.4791	21.8798	22.6564	23.5044	21.8798	22.5344	0.421923	0.445673	1.52811	FALSE	mbt
FBtr0340152;FBtr0340153;FBtr0340151;FBtr0074286	27.1903	26.6147	26.5858	26.9787	23.9571	21.8798	22.8031	25.038	0.0188554	0.835823	3.42287	FALSE	Rok
FBtr0074288	21.8798	21.8798	21.8798	21.8798	21.8798	21.8798	21.8798	21.8798	0.421923	0	0	FALSE	CG9782
FBtr0310319;FBtr0074289;FBtr0330409	26.9111	27.4358	27.6659	27.2188	27.7111	27.8697	27.6932	27.3646	0.301538	0.559265	-0.351752	FALSE	CG9784
FBtr0074290	26.064	26.7035	25.22	23.9242	21.8798	21.8798	21.8798	21.8798	0.00869149	0.865878	3.59816	TRUE	SMC3
FBtr0332870;FBtr0305198;FBtr0074293;FBtr0074292	29.6232	29.0651	29.7945	29.1761	30.2655	30.2592	30.7223	30.63	0.0175943	0.838729	-1.05455	FALSE	CanA-14F
FBtr0309793;FBtr0305593;FBtr0074294	29.5103	28.6423	28.5091	29.8753	28.8439	28.8448	29.2653	28.8181	0.660842	0.204158	0.191232	FALSE	Pp2B-14D
FBtr0074297	21.8798	21.8798	21.8798	21.8798	21.8798	24.3922	23.234	21.8798	0.363371	0.510396	-0.966669	FALSE	CG9903
FBtr0074299	21.8798	24.6189	23.6363	21.8798	26.0392	23.5331	21.8798	23.2442	0.625419	0.225604	-0.670387	FALSE	Cnx14D
FBtr0343016;FBtr0074300	32.0969	31.891	31.8151	31.6883	30.9094	31.2481	30.9261	30.8603	0.00404549	0.88562	0.886827	FALSE	eIF-2alpha
FBtr0074301;FBtr0343350	26.1767	26.2323	26.9725	26.4323	25.0785	26.5972	26.8214	26.889	0.857979	0.0875543	0.106898	FALSE	CG9947
FBtr0334041;FBtr0334038;FBtr0074302	23.4218	24.1693	25.1513	25.0231	23.7537	24.5103	21.8798	23.4923	0.396605	0.490091	1.03234	FALSE	AnxB11
FBtr0340315;FBtr0074305	21.8798	21.8798	21.8798	21.8798	21.8798	21.8798	21.8798	21.8798	0.421923	0	0	FALSE	TH1
FBtr0074310;FBtr0074309;FBtr0074308;FBtr0074307;FBtr0074306	21.8798	21.8798	21.8798	21.8798	21.8798	21.8798	21.8798	21.8798	0.421923	0	0	FALSE	CG9992
FBtr0345129;FBtr0340149;FBtr0074313;FBtr0074312;FBtr0074311	35.0954	34.3604	34.3762	35.1793	33.7528	33.8372	33.6623	33.6942	0.0252451	0.821454	1.01618	FALSE	RpS19a
FBtr0340150;FBtr0074314	21.8798	21.8798	21.8798	21.8798	21.8798	21.8798	21.8798	21.8798	0.421923	0	0	FALSE	mthl1
FBtr0302364;FBtr0074315	23.3545	23.4098	21.8798	21.8798	25.7465	21.8798	21.8798	21.8798	0.87338	0.0774058	-0.215511	FALSE	CG32573
FBtr0074321	22.5006	28.4048	28.3718	22.915	25.2676	28.4178	27.9656	24.4567	0.68112	0.191368	-0.978876	FALSE	CG4653
FBtr0074325	21.8798	21.8798	21.8798	21.8798	21.8798	21.8798	21.8798	21.8798	0.421923	0	0	FALSE	TwdlX
FBtr0074326	21.8798	21.8798	21.8798	21.8798	21.8798	21.8798	21.8798	21.8798	0.421923	0	0	FALSE	TwdlY
FBtr0074329	21.8798	21.8798	21.8798	21.8798	21.8798	21.8798	21.8798	21.8798	0.421923	0	0	FALSE	Twdlalpha
FBtr0074330	27.7574	27.0624	27.1035	27.1891	27.3398	26.9086	24.9988	26.5623	0.383672	0.498632	0.825733	FALSE	mRpL22
FBtr0074333	22.7093	23.346	24.3115	21.8798	21.8798	21.8798	21.8798	21.8798	0.18728	0.64055	1.18188	FALSE	CG4789
FBtr0112994;FBtr0074338;FBtr0074337;FBtr0112995;FBtr0074336	21.8798	23.606	21.8798	22.6284	26.4758	26.7656	21.8798	21.8798	0.421923	0.418477	-1.75174	FALSE	CG4829
FBtr0074339	26.2797	26.3613	26.873	26.1054	27.0911	27.515	26.5543	26.8127	0.200428	0.630133	-0.588429	FALSE	CG4872
FBtr0342976;FBtr0074341	21.8798	21.8798	21.8798	21.8798	21.8798	21.8798	21.8798	21.8798	0.421923	0	0	FALSE	Rcp
FBtr0310519;FBtr0074342	21.8798	21.8798	21.8798	21.8798	21.8798	21.8798	21.8798	21.8798	0.421923	0	0	FALSE	CG4880
FBtr0342973;FBtr0074345;FBtr0074344	27.3582	27.7904	28.0903	26.9464	28.6946	28.843	28.1268	28.2371	0.0930536	0.729478	-0.92906	FALSE	CG4928
FBtr0310520;FBtr0074347	21.8798	26.5626	21.8798	27.7292	24.7598	21.8798	21.8798	21.8798	0.421923	0.390719	1.91305	FALSE	CG9099
FBtr0074348	21.8798	21.8798	21.8798	21.8798	21.8798	21.8798	21.8798	21.8798	0.421923	0	0	FALSE	CG9104
FBtr0074352	21.8798	21.8798	21.8798	21.8798	21.8798	21.8798	21.8798	21.8798	0.421923	0	0	FALSE	CG9125
FBtr0074354;FBtr0306801;FBtr0074353	29.1761	28.8198	28.95	29.2736	28.5452	28.6131	28.677	28.7366	0.0508355	0.779605	0.41186	FALSE	CG9132
FBtr0344090;FBtr0074355	22.2894	24.684	26.4245	22.5991	23.8019	21.8798	21.8798	21.8798	0.393115	0.492523	1.63893	FALSE	Rrp45
FBtr0301352;FBtr0301354;FBtr0301353;FBtr0074357	30.978	30.8216	30.7742	31.1094	30.7068	30.6977	30.9033	30.5817	0.263881	0.583604	0.198422	FALSE	if
FBtr0343364;FBtr0074359;FBtr0343363	27.3931	28.3554	27.9041	26.4247	27.4078	27.9517	27.4029	28.0564	0.742596	0.155285	-0.18537	FALSE	CG9634
FBtr0339830;FBtr0074362	29.3576	29.2072	29.3202	28.1435	28.1641	28.6519	28.3556	28.4142	0.254415	0.590153	0.610669	FALSE	CG9673
FBtr0074363	29.5669	29.3083	29.4872	28.9748	27.874	28.4346	28.8027	28.472	0.0376542	0.79904	0.938494	FALSE	spheroide
FBtr0074364	22.9712	24.8229	22.5353	26.4823	21.8798	27.2245	26.2653	27.135	0.464033	0.326731	-1.42321	FALSE	CG9676
FBtr0074371;FBtr0074370;FBtr0074369;FBtr0074368;FBtr0074367;FBtr0074366;FBtr0074365	23.977	23.8799	25.8724	25.811	26.1056	25.9973	25.9269	25.9825	0.247167	0.594757	-1.11802	FALSE	Sep4
FBtr0074372	21.8798	21.8798	21.8798	21.8798	21.8798	21.8798	21.8798	21.8798	0.421923	0	0	FALSE	Axs
FBtr0074373	21.8798	21.8798	21.8798	21.8798	21.8798	21.8798	23.2351	23.9486	0.344323	0.525075	-0.856022	FALSE	CG13010
FBtr0074376	21.8798	21.8798	21.8798	21.8798	21.8798	21.8798	21.8798	21.8798	0.421923	0	0	FALSE	CG9723
FBtr0112993;FBtr0074377	29.4868	29.4121	28.6692	30.3565	27.5284	27.5156	27.5251	24.2623	0.0860244	0.736894	2.77331	FALSE	SmG
FBtr0340358;FBtr0334461;FBtr0074385;FBtr0074384;FBtr0334460	24.7949	24.8045	24.4603	21.8798	21.8798	21.8798	21.8798	21.8798	0.0997654	0.722691	2.10509	FALSE	CG4991
FBtr0074387	21.8798	23.9993	23.7448	24.5163	23.2255	23.1592	23.7835	23.9968	0.993593	0.00388235	-0.00620785	FALSE	CG5010
FBtr0074388;FBtr0343763;FBtr0343764;FBtr0111000	21.8798	21.8798	21.8798	21.8798	21.8798	21.8798	21.8798	21.8798	0.421923	0	0	FALSE	baz
FBtr0074390	21.8798	21.8798	21.8798	21.8798	21.8798	21.8798	21.8798	21.8798	0.421923	0	0	FALSE	CG32564
FBtr0074392	21.8798	21.8798	21.8798	21.8798	30.2063	29.9252	30.0878	29.8307	2.04182e-08	0.935118	-8.13272	TRUE	CG18258
FBtr0340616;FBtr0074393	30.2346	29.8938	29.2286	30.0619	33.6744	33.8093	33.3316	33.2844	0.000164405	0.922175	-3.67024	TRUE	CG5162
FBtr0074402	21.8798	21.8798	21.8798	21.8798	21.8798	21.8798	21.8798	21.8798	0.421923	0	0	FALSE	CG12995
FBtr0074404	24.2915	24.3935	21.8798	24.0313	21.8798	21.8798	21.8798	21.8798	0.100097	0.722158	1.76924	FALSE	xmas-2
FBtr0345132;FBtr0343293;FBtr0343292;FBtr0074406	32.4435	32.3227	32.0438	31.8158	31.6624	32.2775	31.3943	31.6615	0.331486	0.541509	0.407521	FALSE	RpS5a
FBtr0074410;FBtr0334462;FBtr0113478	25.0653	25.5513	23.7631	21.8798	21.8798	21.9209	21.8798	21.8798	0.133789	0.687013	2.17481	FALSE	Arpc3B
FBtr0304839;FBtr0304840;FBtr0074412;FBtr0310524;FBtr0330596;FBtr0310525	21.8798	21.8798	21.8798	21.8798	21.8798	21.8798	21.8798	21.8798	0.421923	0	0	FALSE	CG8949
FBtr0346190;FBtr0308839;FBtr0074415	25.7546	26.3202	21.8798	22.9631	26.2117	24.1197	26.5094	23.9924	0.53557	0.28191	-0.97892	FALSE	CG9086
FBtr0074417	21.8798	21.8798	21.8798	21.8798	21.8798	21.8798	21.8798	21.8798	0.421923	0	0	FALSE	CG13001
FBtr0342974;FBtr0074418	21.8798	21.8798	21.8798	21.8798	21.8798	21.8798	21.8798	21.8798	0.421923	0	0	FALSE	wus
FBtr0339778;FBtr0339777;FBtr0074428;FBtr0074427;FBtr0074425	21.8798	21.8798	21.8798	21.8798	21.8798	21.8798	21.8798	21.8798	0.421923	0	0	FALSE	CG5445
FBtr0074432;FBtr0074431	21.8798	21.8798	21.8798	21.8798	21.8798	21.8798	21.8798	21.8798	0.421923	0	0	FALSE	CG5613
FBtr0074436	21.8798	21.8798	21.8798	21.8798	21.8798	21.8798	21.8798	21.8798	0.421923	0	0	FALSE	CG8568
FBtr0074440;FBtr0074439;FBtr0340619	27.1119	26.2197	26.1385	26.6858	21.8798	23.9399	23.0992	21.8798	0.00471008	0.882328	3.83932	TRUE	CG8611
FBtr0074441	27.5292	28.1356	21.8798	24.9089	27.6113	23.4359	21.8798	24.5414	0.594181	0.245265	1.24625	FALSE	Fim
FBtr0074443;FBtr0074442	25.5319	26.599	25.8782	24.2681	26.6195	23.3745	22.6717	27.2779	0.708907	0.175206	0.583427	FALSE	Fim
FBtr0339779;FBtr0074445	24.6531	24.2441	22.5613	22.616	21.8798	21.8798	21.8798	21.8798	0.096424	0.72605	1.63885	FALSE	CG8664
FBtr0074446	21.8798	21.8798	21.8798	21.8798	21.8798	21.8798	21.8798	21.8798	0.421923	0	0	FALSE	CG8675
FBtr0339780;FBtr0074447	21.8798	22.9065	21.8798	21.8798	21.8798	21.8798	21.8798	21.8798	0.421923	0.353553	0.256671	FALSE	CG8915
FBtr0074451;FBtr0333757;FBtr0301696;FBtr0340621;FBtr0340620	21.8798	21.8798	21.8798	21.8798	21.8798	21.8798	21.8798	21.8798	0.421923	0	0	FALSE	X11L
FBtr0340622;FBtr0074452	34.0075	33.8505	33.7869	34.2701	33.6042	33.5519	33.9059	33.6819	0.206265	0.625494	0.292786	FALSE	CG5703
FBtr0074453	21.8798	25.5803	21.8798	21.8798	21.8798	21.8798	21.8798	21.8798	0.421923	0.353553	0.925132	FALSE	CG5800
FBtr0074454	27.0742	27.978	27.8479	27.1134	26.8599	27.1093	27.1403	26.7598	0.228984	0.608132	0.536017	FALSE	beta-Spec
FBtr0074456;FBtr0074455	26.9295	26.954	27.0003	27.8622	21.8798	24.0692	25.688	25.9078	0.103888	0.71709	2.80033	FALSE	par-6
FBtr0342784;FBtr0074462	21.8798	21.8798	21.8798	21.8798	24.281	27.1915	27.3127	26.8141	0.00693351	0.872354	-4.52004	TRUE	CG6398
FBtr0074463	26.2324	26.8374	25.4627	27.3193	21.8798	22.3768	23.4736	23.9159	0.0103032	0.860223	3.5514	FALSE	e(y)1
FBtr0303572;FBtr0074464	29.3544	29.6332	29.4633	28.3201	29.8657	29.9045	29.6828	29.74	0.248858	0.593629	-0.605502	FALSE	Ucp4A
FBtr0074465	21.8798	21.8798	21.8798	21.8798	21.8798	21.8798	21.8798	21.8798	0.421923	0	0	FALSE	CG6506
FBtr0074470;FBtr0074469;FBtr0074468;FBtr0074471	21.8798	22.5353	21.8798	21.8798	24.3912	23.9126	21.8798	21.8798	0.421923	0.469937	-0.972188	FALSE	CG15814
FBtr0074472	28.5954	28.4317	28.0072	28.9968	21.8798	21.8798	23.7565	23.8813	0.00128184	0.905696	5.65843	TRUE	CG8142
FBtr0074475	21.8798	21.8798	21.8798	21.8798	21.8798	21.8798	21.8798	21.8798	0.421923	0	0	FALSE	CG8173
FBtr0346186;FBtr0340633;FBtr0100463;FBtr0074476	26.7054	26.7695	26.0364	27.8252	21.8798	21.8798	21.8798	21.8798	0.000235836	0.920176	4.95437	TRUE	CG8188
FBtr0340636;FBtr0074478;FBtr0340634;FBtr0074477;FBtr0340635	21.8798	21.8798	21.8798	21.8798	21.8798	21.8798	21.8798	21.8798	0.421923	0	0	FALSE	chas
FBtr0074479	21.8798	21.8798	21.8798	21.8798	26.4196	28.3924	26.9337	27.0177	0.000321302	0.918205	-5.31106	TRUE	CG12990
FBtr0074480	21.8798	21.8798	21.8798	21.8798	23.642	23.8208	24.6555	21.8798	0.118974	0.701475	-1.61974	FALSE	IntS2
FBtr0074483;FBtr0074482;FBtr0074481;FBtr0333659;FBtr0333660;FBtr0333661;FBtr0333662	26.2441	25.9447	26.502	24.8623	23.32	26.2739	27.1552	26.7683	0.994009	0.00361235	0.00892522	FALSE	RhoGAPp190
FBtr0340623;FBtr0074484	21.8798	22.3634	21.8798	21.8798	21.8798	21.8798	21.8798	21.8798	0.421923	0.353553	0.120908	FALSE	CG8289
FBtr0074486	21.8798	21.8798	21.8798	21.8798	21.8798	21.8798	21.8798	21.8798	0.421923	0	0	FALSE	CG8326
FBtr0334034;FBtr0074493	24.2257	26.4841	23.6681	26.9185	21.8798	23.9853	24.2434	21.8798	0.198293	0.632425	2.32705	FALSE	CG6769
FBtr0342787;FBtr0074504	30.5395	30.318	30.0719	30.8673	29.9955	29.7985	29.9816	30.109	0.134425	0.686268	0.478028	FALSE	Vps4
FBtr0344233;FBtr0074505	21.8798	21.8798	21.8798	21.8798	21.8798	21.8798	21.8798	21.8798	0.421923	0	0	FALSE	CG6847
FBtr0074510;FBtr0339540	21.8798	21.8798	21.8798	21.8798	21.8798	21.8798	21.8798	21.8798	0.421923	0	0	FALSE	dik
FBtr0074511	33.9127	33.7841	33.6279	33.9271	33.7566	34.0496	33.9732	34.0965	0.390988	0.494004	-0.156051	FALSE	scu
FBtr0074514	21.8798	21.8798	21.8798	21.8798	21.8798	21.8798	21.8798	21.8798	0.421923	0	0	FALSE	Taf8
FBtr0074515	21.8798	21.8798	24.7237	21.8798	24.9388	25.0566	21.8798	23.8311	0.421923	0.439923	-1.33579	FALSE	CG7135
FBtr0074521	28.0085	28.0858	27.6415	27.2743	28.2936	28.2381	27.9172	27.7443	0.421923	0.437927	-0.295792	FALSE	wupA
FBtr0310272;FBtr0074528;FBtr0074527	21.8798	21.8798	21.8798	21.8798	21.8798	21.8798	21.8798	21.8798	0.421923	0	0	FALSE	CG7192
FBtr0343318;FBtr0343317;FBtr0074531;FBtr0074530	21.8798	21.8798	21.8798	21.8798	21.8798	21.8798	21.8798	21.8798	0.421923	0	0	FALSE	CG7536
FBtr0074540	23.5062	28.0656	28.2131	22.1092	29.1035	23.4835	27.9156	29.565	0.433244	0.346377	-2.04338	FALSE	CG7772
FBtr0074544	23.6544	24.9949	21.8798	21.8798	21.8798	22.7842	21.8798	21.8798	0.421923	0.42819	0.996329	FALSE	Arp8
FBtr0335120;FBtr0335119;FBtr0100239;FBtr0074545	24.1727	24.6052	23.5486	21.8798	23.895	24.3728	23.7982	22.9566	0.808761	0.116024	-0.204086	FALSE	Frq1
FBtr0343296;FBtr0074553	21.8798	23.4774	21.8798	21.8798	21.8798	21.8798	21.8798	21.8798	0.421923	0.353553	0.399398	FALSE	CG6106
FBtr0074558	21.8798	21.8798	21.8798	21.8798	21.8798	21.8798	21.8798	21.8798	0.421923	0	0	FALSE	CG6179
FBtr0346625;FBtr0074559	35.5071	35.4346	35.7568	34.1246	35.222	34.5568	35.5028	35.2642	0.898158	0.0630001	0.0693269	FALSE	Tsf1
FBtr0074568;FBtr0074569	21.8798	21.8798	21.8798	21.8798	21.8798	21.8798	21.8798	21.8798	0.421923	0	0	FALSE	CG32548
FBtr0074571;FBtr0074570;FBtr0074575;FBtr0074574	27.539	26.6312	27.2226	27.1948	28.4314	27.8416	28.8664	28.1158	0.0376542	0.799019	-1.16692	FALSE	CG32549
FBtr0074576	29.5714	30.2833	30.4511	29.6743	30.3149	30.6745	29.7776	30.0562	0.560765	0.265893	-0.210766	FALSE	betaCOP
FBtr0074593;FBtr0333806;FBtr0333804	21.8798	22.7002	21.8798	21.8798	21.8798	21.8798	21.8798	21.8798	0.421923	0.353553	0.205113	FALSE	Aats-his
FBtr0074596	21.8798	21.8798	21.8798	21.8798	21.8798	21.8798	21.8798	21.8798	0.421923	0	0	FALSE	CG15047
FBtr0074601	21.8798	21.8798	21.8798	21.8798	21.8798	21.8798	21.8798	21.8798	0.421923	0	0	FALSE	CG6540
FBtr0074602	25.1948	21.8798	22.84	24.1297	24.8762	21.8798	22.8266	22.3898	0.671292	0.197444	0.517956	FALSE	fu
FBtr0342846;FBtr0074603	21.8798	21.8798	21.8798	21.8798	21.8798	21.8798	21.8798	21.8798	0.421923	0	0	FALSE	phm
FBtr0074615	29.3689	28.938	29.4657	30.0539	27.0246	26.7918	28.1435	27.8434	0.0162729	0.842042	2.00578	FALSE	CG6617
FBtr0340368;FBtr0074622	28.9169	28.5616	28.6963	29.0823	30.2769	30.1115	29.931	30.1529	0.00123502	0.906343	-1.30378	FALSE	Ggt-1
FBtr0346082;FBtr0074625;FBtr0074624	27.6931	27.5909	27.274	26.7078	26.9842	27.3862	26.7585	27.4701	0.630764	0.22227	0.166671	FALSE	GalNAc-T2
FBtr0343047;FBtr0074626	27.1538	22.6536	28.5264	24.0465	23.8277	23.4096	21.8798	24.3149	0.385312	0.497361	2.23712	FALSE	CG15043
FBtr0074627	21.8798	21.8798	21.8798	21.8798	21.8798	21.8798	21.8798	21.8798	0.421923	0	0	FALSE	CG15044
FBtr0074628	21.8798	21.8798	21.8798	21.8798	21.8798	21.8798	21.8798	21.8798	0.421923	0	0	FALSE	CG15046
FBtr0074629	25.7414	26.2837	25.4366	23.5684	24.7157	24.5167	23.8392	23.8261	0.351857	0.518743	1.0331	FALSE	psh
FBtr0074631	27.7624	27.5628	28.1212	24.1305	28.3647	29.3067	28.4943	28.7201	0.274274	0.577108	-1.82724	FALSE	CG6891
FBtr0074635	21.8798	21.8798	21.8798	21.8798	21.8798	21.8798	21.8798	21.8798	0.421923	0	0	FALSE	Atg101
FBtr0074643	24.4499	21.8798	21.8798	24.2243	21.8798	21.8798	21.8798	21.8798	0.331486	0.539305	1.22867	FALSE	CG7288
FBtr0333158;FBtr0074644	23.8248	23.9425	22.0334	23.6961	23.7586	24.1337	24.3012	24.8734	0.322519	0.546618	-0.892533	FALSE	CG32544
FBtr0342877;FBtr0074647	28.4242	27.8939	28.2304	28.3601	28.0139	27.2215	26.988	27.4943	0.0815766	0.741741	0.797727	FALSE	CG7332
FBtr0344973;FBtr0074648	21.8798	21.8798	21.8798	21.8798	27.8978	28.1954	28.135	28.1779	2.64023e-08	0.935069	-6.22174	TRUE	CG7349
FBtr0074652;FBtr0342879;FBtr0342880	21.8798	21.8798	21.8798	21.8798	21.8798	21.8798	21.8798	21.8798	0.421923	0	0	FALSE	CG7358
FBtr0346018;FBtr0310441;FBtr0074654	31.5483	31.5472	31.3739	31.4947	32.0162	31.8284	32.2774	32.5306	0.0314195	0.809833	-0.6721	FALSE	CG7322
FBtr0074655	28.1763	27.738	27.6455	28.2184	27.8174	27.9664	28.1422	28.2452	0.653401	0.208765	-0.0982386	FALSE	CG7280
FBtr0074659;FBtr0074658;FBtr0074657;FBtr0074656	29.8187	29.1547	29.5812	30.4311	30.3782	30.3472	30.9485	29.9573	0.260134	0.586382	-0.661364	FALSE	bnb
FBtr0074661	21.8798	21.8798	21.8798	21.8798	21.8798	21.8798	21.8798	21.8798	0.421923	0	0	FALSE	CG18259
FBtr0074664	21.8798	21.8798	21.8798	21.8798	21.8798	21.8798	21.8798	21.8798	0.421923	0	0	FALSE	CG7406
FBtr0074666	21.8798	21.8798	21.8798	21.8798	21.8798	21.8798	21.8798	21.8798	0.421923	0	0	FALSE	CG7453
FBtr0074669	21.8798	23.7228	21.8798	21.8798	21.8798	21.8798	21.8798	21.8798	0.421923	0.353553	0.460755	FALSE	Mec2
FBtr0074672	21.8798	21.8798	21.8798	21.8798	21.8798	21.8798	21.8798	21.8798	0.421923	0	0	FALSE	Mur18B
FBtr0074674;FBtr0332392	21.8798	21.8798	21.8798	21.8798	21.8798	21.8798	21.8798	21.8798	0.421923	0	0	FALSE	CG7884
FBtr0074675	27.2043	27.0158	27.0175	27.2816	23.7044	23.2819	23.307	23.4616	3.26924e-06	0.932557	3.69112	TRUE	CG7889
FBtr0344324;FBtr0074682	21.8798	21.8798	21.8798	21.8798	23.4364	22.8471	21.8798	21.8798	0.347971	0.521439	-0.630988	FALSE	out
FBtr0343320;FBtr0074683	21.8798	21.8798	21.8798	21.8798	23.2431	24.1594	21.8798	24.5147	0.131262	0.689333	-1.56948	FALSE	CG8051
FBtr0074684;FBtr0301226	21.8798	23.9713	23.2444	21.8798	24.2079	24.1061	24.0079	23.4876	0.203166	0.628084	-1.20857	FALSE	CG8034
FBtr0074686	23.3711	21.8798	22.0218	24.2542	22.6685	24.8553	23.3546	21.8798	0.773714	0.136931	-0.307845	FALSE	CG32536
FBtr0343635;FBtr0074689;FBtr0343634	21.8798	21.8798	21.8798	21.8798	21.8798	21.8798	21.8798	21.8798	0.421923	0	0	FALSE	rictor
FBtr0074693	26.2741	26.0298	24.0581	27.8941	21.8798	21.8798	21.8798	21.8798	0.0135858	0.849726	4.18422	FALSE	Ulp1
FBtr0074695	21.8798	21.8798	21.8798	21.8798	25.5124	23.4114	24.1232	21.8798	0.161404	0.661507	-1.85192	FALSE	CG7990
FBtr0343313;FBtr0074697	21.8798	26.1488	26.0608	25.1845	27.1265	26.71	21.8798	24.355	0.922407	0.0483445	-0.199361	FALSE	CG7556
FBtr0309224;FBtr0309223;FBtr0074708;FBtr0074707	21.8798	21.8798	21.8798	21.8798	21.8798	21.8798	21.8798	21.8798	0.421923	0	0	FALSE	kek5
FBtr0346014;FBtr0074711	30.7445	31.107	30.853	30.4978	29.7095	30.063	29.2202	29.804	0.0160902	0.842538	1.10137	FALSE	Nat1
FBtr0074712	32.3136	31.8476	32.1731	33.045	32.5177	32.3884	32.8478	32.2673	0.649245	0.211538	-0.160485	FALSE	CG12203
FBtr0339439;FBtr0307194;FBtr0307193;FBtr0307192;FBtr0074720;FBtr0074719;FBtr0074718;FBtr0074715;FBtr0074714;FBtr0074713;FBtr0339440;FBtr0074717;FBtr0074716	30.2724	30.5807	30.5675	29.2912	31.0186	30.9773	30.9187	31.2433	0.120919	0.699566	-0.861526	FALSE	Pfrx
FBtr0074728;FBtr0074727;FBtr0331158	26.3523	27.1097	26.3661	26.0356	26.673	26.7696	25.8657	26.6399	0.958478	0.0261184	-0.0211471	FALSE	car
FBtr0074730	21.8798	21.8798	21.8798	21.8798	21.8798	21.8798	21.8798	21.8798	0.421923	0	0	FALSE	CG14205
FBtr0344339;FBtr0308192;FBtr0074732;FBtr0074731	33.5353	33.3386	33.0242	33.5005	32.374	32.6218	33.0048	32.7867	0.0509941	0.779202	0.65281	FALSE	RpS10b
FBtr0074734	27.7003	27.6621	27.4383	27.9698	27.2601	27.5034	28.1713	27.773	0.957348	0.0267589	0.0156753	FALSE	CG14207
FBtr0344069;FBtr0074739;FBtr0074738;FBtr0074737	21.8798	25.855	26.0476	21.8798	21.8798	21.8798	21.8798	21.8798	0.331486	0.53986	2.03575	FALSE	Shawn
FBtr0344070;FBtr0074740	21.8798	21.8798	21.8798	21.8798	21.8798	21.8798	21.8798	21.8798	0.421923	0	0	FALSE	CG14210
FBtr0332481;FBtr0074741	23.6842	21.8798	25.2421	21.8798	21.8798	21.8798	21.8798	21.8798	0.363666	0.510032	1.29167	FALSE	MKP-4
FBtr0074744;FBtr0074743;FBtr0334277	27.5179	28.2309	26.7636	27.0221	24.4762	26.1161	23.5096	21.8798	0.0558462	0.772655	3.38818	FALSE	Rcd-1
FBtr0345016;FBtr0074746	21.8798	25.7038	23.6009	23.1998	21.8798	21.8798	21.8798	21.8798	0.214366	0.619391	1.71628	FALSE	CG14215
FBtr0344152;FBtr0074747	21.8798	21.8798	21.8798	21.8798	21.8798	21.8798	21.8798	21.8798	0.421923	0	0	FALSE	Ssu72
FBtr0074748;FBtr0340611;FBtr0074749	30.9938	31.3667	31.0548	30.6179	31.8379	32.3426	32.1655	32.5046	0.0102632	0.860381	-1.20436	FALSE	Zw
FBtr0340612;FBtr0074750	29.495	29.4331	29.3606	30.4552	30.1049	30.0965	29.9313	29.8424	0.421923	0.399792	-0.307786	FALSE	Ubqn
FBtr0309215;FBtr0309214;FBtr0074751	28.4908	29.1531	29.3053	29.3542	29.243	29.0528	28.982	29.0313	0.995283	0.00266947	-0.00145188	FALSE	Cdc42
FBtr0074756	21.8798	21.8798	24.2802	21.8798	21.8798	21.8798	21.8798	21.8798	0.421923	0.353553	0.600099	FALSE	dome
FBtr0340614;FBtr0074759	23.2321	26.4148	26.2465	23.8131	21.8798	21.8798	21.8798	21.8798	0.0498044	0.780998	3.04686	FALSE	Ranbp21
FBtr0345991;FBtr0074760	27.6802	27.4995	26.3451	26.5598	28.3772	27.5444	21.8798	21.8798	0.421923	0.403305	2.10087	FALSE	Arp10
FBtr0074761	26.4992	26.7091	26.2003	25.9084	25.8494	25.9936	23.4015	22.6287	0.220575	0.614506	1.86097	FALSE	CG12237
FBtr0334281;FBtr0334278;FBtr0074762;FBtr0334280;FBtr0334279	21.8798	23.5995	24.8486	24.564	23.5737	23.5183	24.0317	24.2322	0.896703	0.0638266	-0.115985	FALSE	e(y)3
FBtr0332484;FBtr0332483;FBtr0074763;FBtr0332482	27.1369	26.4236	26.6607	24.1273	21.8798	22.8063	21.8798	23.7615	0.028606	0.814815	3.50531	FALSE	NAA20
FBtr0344072;FBtr0074767	25.1335	24.0952	25.2935	26.4353	21.8798	21.2688	21.8798	25.3484	0.148952	0.672056	2.64516	FALSE	Tim9b
FBtr0303999;FBtr0074772;FBtr0074771;FBtr0336691;FBtr0074773;FBtr0304000;FBtr0074774;FBtr0309237;FBtr0336692	22.8727	25.0028	24.5574	24.6723	21.8798	21.8798	23.0737	23.6248	0.144318	0.676233	1.66179	FALSE	Tao
FBtr0301308;FBtr0074775;FBtr0343590;FBtr0074777;FBtr0301307;FBtr0074776	27.0397	24.6541	24.3936	26.679	21.8798	25.5092	21.8798	24.7239	0.285518	0.569487	2.19342	FALSE	Grip84
FBtr0074784;FBtr0302082	27.7106	26.1793	26.9357	26.4102	21.8798	21.8798	21.8798	21.8798	0.000158863	0.922368	4.92918	TRUE	pcm
FBtr0346015;FBtr0074785	27.3304	26.5518	27.1665	28.0405	25.7488	23.0901	24.5825	26.8126	0.141154	0.679405	2.21377	FALSE	mRpS14
FBtr0074787	23.8541	24.8646	23.9153	23.6232	21.8798	22.9233	21.8798	21.8798	0.0160237	0.8427	1.92367	FALSE	CG14230
FBtr0074789	31.2331	31.1778	31.0245	30.626	31.3171	31.0547	30.9488	31.2867	0.503989	0.301324	-0.136455	FALSE	AP-1-2beta
FBtr0346042;FBtr0074793	29.7282	30.3967	29.6482	29.4339	29.9081	29.9278	29.8111	30.2484	0.546434	0.274919	-0.172111	FALSE	parvin
FBtr0074794;FBtr0331763	26.4543	24.5436	23.5734	26.975	21.8798	21.8798	26.0515	24.2773	0.421923	0.474881	1.86449	FALSE	Alr
FBtr0335156;FBtr0335157;FBtr0335155;FBtr0074795	29.0588	29.3611	29.3922	26.2042	30.3826	30.7172	30.5297	30.1499	0.154872	0.666783	-1.94079	FALSE	Pmp70
FBtr0074799;FBtr0074798	27.3616	27.3012	27.8023	26.9197	25.3465	24.2833	24.2585	21.8798	0.0249854	0.822034	3.40417	FALSE	Nup205
FBtr0303996;FBtr0074805;FBtr0303995;FBtr0074804	21.8798	21.8798	21.8798	21.8798	21.8798	21.8798	21.8798	21.8798	0.421923	0	0	FALSE	pico
FBtr0345014;FBtr0074808;FBtr0074807	21.8798	21.8798	21.8798	21.8798	21.8798	21.8798	21.8798	21.8798	0.421923	0	0	FALSE	vfl
FBtr0346378;FBtr0335137;FBtr0074809	21.8798	23.8523	21.8798	21.8798	21.8798	21.8798	21.8798	21.8798	0.421923	0.353553	0.493139	FALSE	CG12702
FBtr0339436;FBtr0339435;FBtr0301703;FBtr0074812	21.8798	21.8798	21.8798	21.8798	21.8798	21.8798	21.8798	21.8798	0.421923	0	0	FALSE	meso18E
FBtr0309218;FBtr0074813	26.1495	25.8372	25.4614	26.1751	25.8063	26.0645	26.4265	26.0086	0.516924	0.293285	-0.170678	FALSE	CG14232
FBtr0309217;FBtr0074814	21.8798	21.8798	21.8798	21.8798	21.8798	21.8798	21.8798	21.8798	0.421923	0	0	FALSE	CG14231
FBtr0074815	21.8798	21.8798	21.8798	21.8798	21.8798	22.1607	21.8924	24.446	0.421923	0.398165	-0.714956	FALSE	CoVIb
FBtr0332690;FBtr0074819	21.8798	21.8798	21.8798	21.8798	21.8798	21.8798	21.8798	21.8798	0.421923	0	0	FALSE	gig
FBtr0074826;FBtr0074825;FBtr0332693	21.8798	21.8798	21.8798	21.8798	21.8798	21.8798	21.8798	21.8798	0.421923	0	0	FALSE	Su(var)3-3
FBtr0074827	21.8798	21.8798	21.8798	21.8798	21.8798	21.8798	21.8798	21.8798	0.421923	0	0	FALSE	CG13813
FBtr0074829;FBtr0074828	21.8798	21.8798	21.8798	21.8798	21.8798	21.8798	21.8798	21.8798	0.421923	0	0	FALSE	CG6951
FBtr0332771;FBtr0301126;FBtr0300813;FBtr0074830	29.1828	29.3901	29.1077	30.781	29.0334	28.5059	29.7779	28.8792	0.421923	0.409248	0.566291	FALSE	Clc
FBtr0344228;FBtr0074838;FBtr0074837;FBtr0332775	22.7575	24.2694	21.8798	24.6399	23.373	22.4507	24.202	23.2191	0.93764	0.0389202	0.0754355	FALSE	CG6597
FBtr0100318;FBtr0074839	28.5113	28.8368	28.39	29.1543	21.8798	21.8798	21.8798	21.8798	9.89894e-07	0.933648	6.84331	TRUE	polo
FBtr0074840	30.5457	30.989	30.9579	30.3595	30.733	30.9018	30.6258	30.8997	0.716317	0.170859	-0.0770312	FALSE	alphaSnap
FBtr0345816;FBtr0074842;FBtr0074841	28.7611	28.7947	28.9017	27.9099	28.3668	28.8294	28.7553	28.5256	0.933588	0.0414447	-0.0274481	FALSE	Spn77Ba
FBtr0074843	28.7615	22.9681	24.3921	23.6092	34.124	33.4964	32.9535	33.3619	0.00656305	0.874015	-8.55124	TRUE	Spn77Bb
FBtr0074845	21.8798	21.8798	21.8798	21.8798	26.3502	21.8798	21.8798	23.5937	0.413066	0.480194	-1.5461	FALSE	CG32225
FBtr0074846	21.8798	21.8798	21.8798	21.8798	21.8798	21.8798	21.8798	21.8798	0.421923	0	0	FALSE	Pex23
FBtr0074847	21.8798	21.8798	21.8798	21.8798	21.8798	21.8798	21.8798	21.8798	0.421923	0	0	FALSE	FRG1
FBtr0074849	23.2425	26.2124	26.5174	21.8798	21.8798	21.8798	21.8798	23.3214	0.289421	0.56712	2.22281	FALSE	CG17122
FBtr0074851;FBtr0306328;FBtr0306327;FBtr0074850;FBtr0308204;FBtr0302113;FBtr0306329;FBtr0306326	21.8798	21.8798	21.8798	21.8798	21.8798	21.8798	21.8798	21.8798	0.421923	0	0	FALSE	CG17233
FBtr0332694;FBtr0074855;FBtr0074853;FBtr0310468;FBtr0074854	21.8798	21.8798	21.8798	21.8798	21.8798	21.8798	21.8798	21.8798	0.421923	0	0	FALSE	CG6933
FBtr0332695;FBtr0074856	23.2306	21.8798	21.8798	21.8798	21.8798	21.8798	21.8798	21.8798	0.421923	0.353553	0.337706	FALSE	CG7017
FBtr0074859	21.8798	21.8798	21.8798	21.8798	21.8798	21.8798	21.8798	21.8798	0.421923	0	0	FALSE	CG7298
FBtr0074864	25.4021	25.7791	24.3622	24.9361	21.8798	24.93	23.7423	23.6491	0.19851	0.632105	1.56958	FALSE	CG7328
FBtr0332700;FBtr0074867	21.8798	21.8798	21.8798	21.8798	21.8798	21.8798	23.7634	24.087	0.33159	0.537823	-1.02271	FALSE	CG7365
FBtr0302366;FBtr0074872	26.9086	25.9192	26.9401	27.2205	26.8271	26.62	27.1848	27.3759	0.538952	0.279753	-0.254868	FALSE	CG14184
FBtr0333877;FBtr0074875;FBtr0074874;FBtr0074873	21.8798	21.8798	21.8798	21.8798	21.8798	21.8798	24.1435	21.8798	0.421923	0.353553	-0.565937	FALSE	HLH106
FBtr0074880;FBtr0344256;FBtr0074879	29.0375	28.9432	28.685	29.9064	28.1781	28.5257	28.6881	28.7101	0.225248	0.611019	0.617536	FALSE	CG15881
FBtr0074881	27.8433	27.8975	27.5418	27.9652	27.3452	28.0537	27.9708	27.4654	0.680377	0.192061	0.103182	FALSE	Kap-alpha1
FBtr0332726;FBtr0310476;FBtr0100666;FBtr0332153;FBtr0074882	21.8798	21.8798	21.8798	21.8798	21.8798	21.8798	21.8798	21.8798	0.421923	0	0	FALSE	Deaf1
FBtr0074884	22.9308	21.8798	21.8798	21.8798	21.8798	21.8798	21.8798	21.8798	0.421923	0.353553	0.26275	FALSE	kto
FBtr0332147;FBtr0111108;FBtr0074889;FBtr0074888	21.8798	21.8798	21.8798	21.8798	21.8798	21.8798	21.8798	21.8798	0.421923	0	0	FALSE	Papss
FBtr0074891;FBtr0074892	25.4775	21.8798	22.8251	26.7437	21.8798	21.8798	21.8798	21.8798	0.232903	0.605108	2.35175	FALSE	Prp3
FBtr0074893	32.6951	32.8421	32.4888	32.5772	32.2034	32.2858	31.9619	32.1399	0.0185942	0.83638	0.503048	FALSE	Rpn1
FBtr0330181;FBtr0074894	27.6434	28.0716	27.4036	28.8873	25.4635	26.7542	24.4827	26.7836	0.0724926	0.751646	2.13049	FALSE	CG7770
FBtr0074895	27.7951	27.6461	29.1119	28.3154	29.1033	28.6671	29.1284	28.3115	0.390897	0.494155	-0.585404	FALSE	Grasp65
FBtr0331800;FBtr0074896	31.1364	30.9918	31.2411	31.1542	30.6286	30.6127	30.849	30.6622	0.00931465	0.863654	0.442739	FALSE	RhoGDI
FBtr0074897;FBtr0304746	21.8798	21.8798	23.2114	21.8798	22.6094	23.6511	21.8798	21.8798	0.661831	0.203612	-0.292326	FALSE	Ac76E
FBtr0344084;FBtr0074900	28.4788	28.5023	28.6744	28.5055	28.5507	28.4817	28.2172	28.3406	0.348938	0.520762	0.14274	FALSE	CG7646
FBtr0074902	28.6453	28.1408	28.3415	28.1547	28.2138	28.7166	29.1967	28.68	0.350072	0.520107	-0.381214	FALSE	Nca
FBtr0332719;FBtr0074903	29.0276	29.2235	29.2504	28.8669	29.1375	29.1302	28.9046	29.3028	0.864799	0.0834632	-0.0266806	FALSE	Tom20
FBtr0332720;FBtr0074904	21.8798	21.8798	21.8798	21.8798	21.8798	21.8798	21.8798	21.8798	0.421923	0	0	FALSE	CG7668
FBtr0344085;FBtr0302049;FBtr0074909;FBtr0074908	33.8329	33.926	33.7167	33.9856	33.4528	33.5036	33.6565	33.896	0.23677	0.602286	0.238086	FALSE	CG7433
FBtr0332723;FBtr0074910	35.04	34.8288	34.8954	35.263	34.8592	34.8236	35.0759	35.033	0.680504	0.191951	0.0588898	FALSE	fln
FBtr0074915	28.2201	28.8358	28.1394	28.349	27.8321	28.4013	28.5761	29.2227	0.766434	0.141256	-0.121999	FALSE	CG8004
FBtr0074916;FBtr0074917	21.8798	21.8798	21.8798	21.8798	21.8798	21.8798	21.8798	21.8798	0.421923	0	0	FALSE	Su(z)12
FBtr0074918	23.6362	23.7929	26.0661	21.8798	21.8798	21.8798	21.8798	21.8798	0.189971	0.638522	1.96396	FALSE	Mtr3
FBtr0332152;FBtr0302046;FBtr0074919;FBtr0100394	27.918	27.9534	28.1153	27.9417	26.6123	26.0527	25.9175	25.6823	0.00129717	0.905547	1.91592	FALSE	Mi-2
FBtr0344257;FBtr0302047;FBtr0074920	21.8798	21.8798	21.8798	21.8798	21.8798	21.8798	21.8798	21.8798	0.421923	0	0	FALSE	Su(Tpl)
FBtr0308833;FBtr0074921;FBtr0308832	28.0039	27.6364	27.8787	27.2609	28.187	28.0051	28.314	27.695	0.339996	0.528801	-0.35529	FALSE	Rab8
FBtr0074922;FBtr0332154	27.1547	27.3303	26.5925	26.685	27.2312	27.2392	27.8834	27.6328	0.183645	0.643293	-0.556018	FALSE	trc
FBtr0074925	26.1702	26.8246	23.0909	23.6518	27.176	26.9566	26.5503	26.953	0.22211	0.613211	-1.97461	FALSE	Cyp305a1
FBtr0333878;FBtr0074927	27.9963	28.0505	27.7844	28.36	27.1939	27.1822	27.957	26.9372	0.105046	0.715421	0.730202	FALSE	CG14103
FBtr0074928	21.8798	21.8798	21.8798	21.8798	21.8798	21.8798	21.8798	21.8798	0.421923	0	0	FALSE	CG14102
FBtr0074933	23.8989	21.8798	21.8798	21.8798	21.8798	21.8798	21.8798	21.8798	0.421923	0.353553	0.504786	FALSE	Cpr76Bb
FBtr0074937;FBtr0074936	21.8798	21.8798	21.8798	21.8798	23.2131	26.1878	24.2967	22.7902	0.101256	0.720392	-2.24216	FALSE	Rcd7
FBtr0074938	26.5879	26.5135	27.1892	23.5179	21.8798	23.4068	21.8798	21.8798	0.036618	0.800845	3.69061	FALSE	CG9300
FBtr0074940	29.0784	28.6138	29.0588	29.3011	26.5761	27.939	26.6167	25.6906	0.0205004	0.831592	2.30744	FALSE	CG9330
FBtr0074941;FBtr0333272	25.8876	26.1152	21.968	26.2443	21.8798	21.8798	21.8798	21.8798	0.0906815	0.731915	3.17399	FALSE	Taf6
FBtr0074942;FBtr0074944;FBtr0336786	23.3411	25.1561	24.5443	21.8798	22.3611	24.116	21.8798	21.8798	0.421923	0.439951	1.17113	FALSE	CG9368
FBtr0074945	27.5615	27.4558	27.8032	27.1492	27.6715	27.5281	27.0032	27.0263	0.497272	0.30569	0.185126	FALSE	CG9372
FBtr0074946	21.8798	21.8798	21.8798	21.8798	21.8798	21.8798	21.8798	21.8798	0.421923	0	0	FALSE	CG9376
FBtr0302381;FBtr0074947	28.3405	27.6734	27.6093	28.5917	21.8798	21.8798	21.8798	21.8798	9.34805e-06	0.931065	6.17395	TRUE	asf1
FBtr0074948	21.8798	21.8798	21.8798	21.8798	22.4787	21.8798	21.8798	21.8798	0.421923	0.353553	-0.149734	FALSE	ms(3)76Cc
FBtr0074949	31.9559	31.7829	31.9851	31.5857	32.3261	32.1165	32.1718	32.0385	0.0938758	0.728676	-0.335816	FALSE	Gbeta76C
FBtr0302283;FBtr0074952	24.1627	23.7732	25.039	21.8798	22.741	23.5544	21.8798	23.0574	0.421923	0.412098	0.905559	FALSE	CG42638;Trpml
FBtr0333862;FBtr0074953	21.8798	21.8798	21.8798	21.8798	23.0137	21.8798	21.8798	21.8798	0.421923	0.353553	-0.283471	FALSE	serp
FBtr0074961	29.1285	29.8684	29.149	28.8654	29.1075	29.8379	29.4758	29.4159	0.528252	0.286379	-0.206482	FALSE	Oat
FBtr0074962;FBtr0331862;FBtr0290116;FBtr0306354	21.8798	21.8798	21.8798	21.8798	21.8798	21.8798	21.8798	21.8798	0.421923	0	0	FALSE	CG8786
FBtr0333896;FBtr0074966	27.09	26.4187	26.7233	26.8405	21.8798	26.3587	25.9424	26.2605	0.391614	0.493605	1.65779	FALSE	l(3)76BDm
FBtr0074971	23.503	26.8532	21.8798	23.5078	21.8798	21.8798	21.8798	21.8798	0.261061	0.585741	2.05615	FALSE	CG14100
FBtr0344994;FBtr0074972	30.1173	30.2149	30.4236	30.2455	29.8178	30.3763	30.5132	30.3595	0.939549	0.0375947	-0.0163857	FALSE	CG9231
FBtr0074973;FBtr0333273;FBtr0112853	25.2926	25.664	22.4518	21.8798	23.3866	23.734	24.0306	23.5069	0.901083	0.0614532	0.157505	FALSE	Shal
FBtr0074974	27.1143	27.3629	27.0925	27.3897	25.1772	26.6799	26.2822	26.268	0.0647479	0.760907	1.13801	FALSE	l(3)76BDr
FBtr0074978	24.6412	24.3399	23.995	21.8798	21.8798	21.8798	21.8798	21.8798	0.103257	0.717908	1.83419	FALSE	CG9452
FBtr0333845;FBtr0074979	26.4812	26.1462	25.9257	26.445	26.8546	26.4512	26.8397	26.0729	0.421923	0.449064	-0.30507	FALSE	CG9451
FBtr0074984;FBtr0333844;FBtr0074930	21.8798	21.8798	21.8798	21.8798	21.8798	21.8798	21.8798	21.8798	0.421923	0	0	FALSE	CG18294;CG12519
FBtr0074987	30.611	30.73	31.0208	30.7249	30.4381	31.0937	30.9406	30.7045	0.917737	0.05116	-0.022511	FALSE	CG14095
FBtr0344993;FBtr0331852;FBtr0074988	30.4291	30.52	30.1157	30.7401	28.814	29.189	29.1614	29.457	0.00454793	0.883074	1.2959	FALSE	rept
FBtr0074990;FBtr0074989	21.8798	21.8798	21.8798	21.8798	21.8798	21.8798	21.8798	21.8798	0.421923	0	0	FALSE	Bet1
FBtr0344454;FBtr0074991	21.8798	21.8798	21.8798	21.8798	21.8798	21.8798	21.8798	21.8798	0.421923	0	0	FALSE	CG9666
FBtr0074998	21.8798	21.8798	24.5071	21.8798	21.8798	21.6522	21.8798	24.0771	0.882921	0.0719308	0.164399	FALSE	Chd3
FBtr0075003	21.8798	21.8798	21.8798	21.8798	21.8798	21.8798	21.8798	21.8798	0.421923	0	0	FALSE	pip
FBtr0075005	21.8798	21.8798	21.8798	21.8798	21.8798	21.8798	21.8798	21.8798	0.421923	0	0	FALSE	pip
FBtr0075007	21.8798	21.8798	21.8798	21.8798	21.8798	21.8798	21.8798	21.8798	0.421923	0	0	FALSE	pip
FBtr0075008	21.8798	21.8798	21.8798	21.8798	21.8798	21.8798	21.8798	21.8798	0.421923	0	0	FALSE	pip
FBtr0075009	21.8798	21.8798	21.8798	21.8798	21.8798	21.8798	21.8798	21.8798	0.421923	0	0	FALSE	pip
FBtr0075012	21.8798	21.8798	21.8798	21.8798	21.8798	21.8798	21.8798	21.8798	0.421923	0	0	FALSE	pip
FBtr0333897;FBtr0075013	21.8798	21.8798	21.8798	21.8798	24.8938	21.8798	21.8798	21.8798	0.421923	0.353553	-0.753515	FALSE	pip
FBtr0345390;FBtr0332155;FBtr0331425;FBtr0075014	26.4225	26.6451	27.1628	26.4884	26.1614	26.5131	23.6909	26.3782	0.421923	0.47432	0.99381	FALSE	Gbs-76A
FBtr0075017	31.1527	31.0607	31.1682	31.4361	32.2722	32.0502	32.6425	32.4558	0.00319155	0.890959	-1.15076	FALSE	CG9629
FBtr0345391;FBtr0310276;FBtr0075018	21.8798	21.8798	21.8798	21.8798	21.8798	21.8798	21.8798	21.8798	0.421923	0	0	FALSE	Max
FBtr0075021;FBtr0075020;FBtr0075019	23.5535	22.5752	25.6989	21.8798	25.7024	25.4503	25.6478	23.573	0.332698	0.535184	-1.66651	FALSE	nes
FBtr0346548;FBtr0333224;FBtr0075022	28.3647	27.8646	28.293	27.2102	26.5468	27.3792	26.0307	27.4179	0.147489	0.673251	1.08944	FALSE	mRpL21
FBtr0075024	23.8294	24.458	21.8798	23.9299	23.0876	21.8798	24.4709	21.8798	0.505398	0.30033	0.694717	FALSE	CG14075
FBtr0075025	28.1285	29.187	29.435	27.3265	30.0418	29.906	28.9145	29.5723	0.256531	0.588723	-1.08941	FALSE	CG6812
FBtr0075026;FBtr0330090	26.472	26.3053	23.8063	25.6219	21.8798	22.9779	21.8798	21.8798	0.0160902	0.842513	3.39705	FALSE	MESR6
FBtr0332735;FBtr0330194;FBtr0299586;FBtr0112890;FBtr0075029;FBtr0075028;FBtr0330195	21.8798	21.8798	21.8798	21.8798	21.8798	21.8798	21.8798	21.8798	0.421923	0	0	FALSE	fz2
FBtr0330093;FBtr0075032	21.8798	21.8798	21.8798	21.8798	21.8798	21.8798	21.8798	21.8798	0.421923	0	0	FALSE	Gem2
FBtr0075033	28.7671	28.9833	28.3633	29.0084	28.9409	28.5108	28.5	28.9524	0.826936	0.10534	0.0544814	FALSE	CG10424
FBtr0075034	27.0529	26.7943	26.1917	28.2118	25.2368	23.9669	23.5224	22.6294	0.0217442	0.828906	3.22379	FALSE	CG11577
FBtr0333220;FBtr0075035;FBtr0330089	21.8798	21.8798	24.4772	21.8798	21.8798	21.8798	21.8798	21.8798	0.421923	0.353553	0.649355	FALSE	Mkp3
FBtr0308781;FBtr0075038	26.7783	23.6596	21.8798	21.8798	33.8603	33.3723	33.2736	33.5032	0.00197335	0.899345	-9.95299	TRUE	Acp76A
FBtr0075040	28.9306	29.3886	29.5776	28.3664	28.5961	29.5178	28.496	28.6389	0.571705	0.259104	0.253613	FALSE	CG18136
FBtr0075041	26.476	26.7949	26.1116	27.0044	21.8798	21.8798	23.7656	23.7375	0.00595321	0.876686	3.78108	TRUE	CG3808
FBtr0075043;FBtr0332651;FBtr0075042;FBtr0075044;FBtr0075045	30.0058	30.1131	30.104	28.7578	32.3648	32.2311	32.2806	31.9824	0.00391887	0.88634	-2.46955	TRUE	CG18135
FBtr0333710;FBtr0075048	21.8798	21.8798	21.8798	21.8798	21.8798	21.8798	21.8798	21.8798	0.421923	0	0	FALSE	CG3819
FBtr0331420;FBtr0331422;FBtr0331421;FBtr0075049	21.8798	21.8798	24.6398	23.7224	21.8798	21.8798	21.8798	21.8798	0.342541	0.526302	1.15066	FALSE	MYPT-75D
FBtr0075050	21.8798	21.8798	21.8798	21.8798	21.8798	21.8798	21.8798	21.8798	0.421923	0	0	FALSE	GNBP1
FBtr0075051	21.8798	21.8798	21.8798	21.8798	21.8798	21.8798	21.8798	21.8798	0.421923	0	0	FALSE	CG32202
FBtr0075053	21.8798	21.8798	21.8798	21.8798	21.8798	21.8798	21.8798	21.8798	0.421923	0	0	FALSE	CG6885
FBtr0075054	24.2662	21.8798	21.8798	23.2304	21.8798	21.8798	21.8798	21.8798	0.357052	0.514359	0.934271	FALSE	MED11
FBtr0075055	27.5187	27.7035	27.4045	28.2514	27.7749	27.8721	27.9891	27.4473	0.856757	0.0883809	-0.0513409	FALSE	Atg3
FBtr0075057;FBtr0075056	21.8798	21.8798	21.8798	21.8798	21.8798	21.8798	21.8798	21.8798	0.421923	0	0	FALSE	HipHop
FBtr0075058	34.5046	34.6879	34.4515	34.7817	34.8574	34.8003	34.7354	34.7479	0.211808	0.621289	-0.178852	FALSE	Cat
FBtr0308813;FBtr0075063	30.7277	30.1341	29.9121	30.4722	30.4613	30.231	30.7173	30.4353	0.56055	0.266047	-0.149698	FALSE	CG6852
FBtr0075064	30.3859	30.3364	30.2854	30.119	29.9127	29.9494	29.2528	29.7415	0.0709153	0.753494	0.567569	FALSE	Ugt
FBtr0333709;FBtr0075066	33.1259	32.5504	32.9518	32.9221	32.2173	32.1289	32.121	31.7347	0.0150756	0.845369	0.837067	FALSE	RpL26
FBtr0346816;FBtr0075068	27.5084	27.5302	27.8746	27.5424	26.0411	25.3446	21.8798	21.8798	0.0640437	0.761834	3.82759	FALSE	CG6841
FBtr0075069	21.8798	21.8798	21.8798	21.8798	21.8798	21.8798	21.8798	21.8798	0.421923	0	0	FALSE	CG6839
FBtr0075074	27.0951	27.4409	27.8578	26.4403	23.5068	25.5895	26.4204	26.0658	0.14956	0.671468	1.81286	FALSE	CSN1b
FBtr0075076	33.1407	32.9148	32.8941	32.8053	33.7861	33.4224	34.0015	33.8709	0.00979929	0.86189	-0.831531	FALSE	CG3902
FBtr0075081;FBtr0301857;FBtr0075083;FBtr0075082	26.9754	26.8764	27.5956	25.686	29.1659	28.4364	28.9417	28.279	0.0305964	0.811416	-1.9224	FALSE	Indy
FBtr0304627;FBtr0075087;FBtr0075086;FBtr0347045	21.8798	21.8798	21.8798	21.8798	21.8798	21.8798	21.8798	21.8798	0.421923	0	0	FALSE	ftz-f1
FBtr0345812;FBtr0075091	28.0246	27.7548	26.3909	27.8403	28.0394	28.1032	27.4782	27.99	0.423429	0.352619	-0.400077	FALSE	Cyp12c1
FBtr0345383;FBtr0075092	28.6237	28.0289	27.8667	28.8978	27.8975	28.0751	28.5646	27.81	0.468884	0.323599	0.267473	FALSE	Chmp1
FBtr0345806;FBtr0075098	30.8941	30.8068	30.333	32.0738	27.7803	26.1755	26.5151	27.0365	0.002433	0.895868	4.15006	TRUE	Capr
FBtr0075101;FBtr0075112	21.8798	21.8798	21.8798	21.8798	21.8798	21.8798	21.8798	21.8798	0.421923	0	0	FALSE	CG7271;term
FBtr0075108	21.8798	21.8798	21.8798	21.8798	21.8798	21.8798	21.8798	21.8798	0.421923	0	0	FALSE	bora
FBtr0075116;FBtr0075115	27.4092	24.7002	21.8798	27.1608	32.4761	32.3394	32.8147	32.7791	0.0109367	0.858176	-7.31482	FALSE	Met75Cb;Met75Ca
FBtr0075117	26.7221	26.4567	25.2307	25.8888	27.3714	27.7054	26.373	26.4509	0.274274	0.577108	-0.900593	FALSE	CG4306
FBtr0075121	27.4682	26.9225	27.2829	27.7809	26.7392	27.8323	22.8514	22.8349	0.328074	0.543714	2.29919	FALSE	mRpS26
FBtr0075124;FBtr0075123	21.8798	21.8798	21.8798	21.8798	21.8798	21.8798	21.8798	21.8798	0.421923	0	0	FALSE	CG7341
FBtr0333697;FBtr0333696;FBtr0075125	27.9899	27.9182	27.7974	26.8778	28.8696	28.6892	28.2313	28.687	0.0711658	0.753193	-0.973487	FALSE	CG32195
FBtr0332861;FBtr0075127	21.8798	21.8798	21.8798	21.8798	25.7933	24.6374	23.4464	26.0252	0.0145972	0.846776	-3.09581	FALSE	CG7330
FBtr0075129	24.9476	24.0144	21.8798	23.1082	21.8798	26.106	25.2931	25.5639	0.421923	0.36968	-1.22318	FALSE	CheA75a
FBtr0075132	21.8798	21.8798	21.8798	21.8798	27.2247	23.2387	26.6939	26.4846	0.025929	0.819823	-4.03071	FALSE	CG5103
FBtr0332863;FBtr0075135	23.3811	23.554	26.1965	21.8798	29.1873	28.9724	28.4468	28.7391	0.0114248	0.856517	-5.08355	FALSE	Cyp312a1
FBtr0331810;FBtr0075140	35.0091	35.2191	35.0997	35.041	35.6222	35.1548	35.5289	35.2933	0.135394	0.685383	-0.307579	FALSE	CG7430
FBtr0331811;FBtr0075141	28.0053	26.9737	27.1393	28.1536	27.8341	28.9144	28.6293	28.5695	0.163562	0.659617	-0.918872	FALSE	CG7441
FBtr0300282;FBtr0300281;FBtr0075142	26.6584	26.7188	24.6649	26.9976	24.4015	23.3368	26.9004	26.6102	0.454419	0.33278	0.947689	FALSE	CG7408
FBtr0075143	21.8798	21.8798	21.8798	21.8798	21.8798	21.8798	21.8798	21.8798	0.421923	0	0	FALSE	CG7402
FBtr0075144	21.8798	21.8798	21.8798	21.8798	21.8798	21.8798	21.8798	21.8798	0.421923	0	0	FALSE	CG14353
FBtr0075152	23.1524	26.6274	26.6857	25.9294	21.8798	21.8798	21.8798	21.8798	0.0258701	0.820015	3.71897	FALSE	CG5290
FBtr0075153	23.6543	21.8798	21.8798	24.2498	21.8798	21.8798	21.8798	21.8798	0.334873	0.532777	1.03613	FALSE	Prestin
FBtr0075155;FBtr0075154	21.8798	21.8798	26.2321	21.8798	21.8798	21.8798	21.8798	21.8798	0.421923	0.353553	1.08808	FALSE	Tsp74F
FBtr0075157	27.9979	28.1297	28.7754	27.1874	27.0531	27.9696	26.118	25.7447	0.210321	0.622415	1.30123	FALSE	CG5506
FBtr0075159;FBtr0273277	22.9412	24.0531	23.9767	24.0674	21.8798	23.2883	25.0219	24.4895	0.926595	0.0456455	0.0897367	FALSE	CG5535
FBtr0345815;FBtr0075160	23.6311	22.66	23.6328	23.6046	21.8798	23.7397	24.3764	21.8798	0.629212	0.223457	0.413239	FALSE	MED19
FBtr0075161	28.9106	28.8833	29.1749	28.9584	29.5251	29.8364	29.6412	29.9829	0.00703813	0.871851	-0.764584	FALSE	CG5567
FBtr0347063;FBtr0075162	27.7419	27.7528	27.1716	27.9522	28.4326	28.6965	28.6045	28.9412	0.0157814	0.843267	-1.01407	FALSE	CG5577
FBtr0075170	21.8798	21.8798	21.8798	22.7598	21.8798	21.8798	21.8798	21.8798	0.421923	0.353553	0.219997	FALSE	CG5589
FBtr0075171	28.9423	27.85	28.0015	30.1877	28.1812	27.9795	28.7029	28.4792	0.559063	0.267155	0.409708	FALSE	NUCB1
FBtr0345118;FBtr0345117;FBtr0302041;FBtr0075173	21.8798	21.8798	21.8798	21.8798	21.8798	21.8798	21.8798	21.8798	0.421923	0	0	FALSE	Oatp74D
FBtr0345387;FBtr0344941;FBtr0331842;FBtr0075175	25.8027	23.3143	25.1794	26.4934	21.8798	21.8798	21.8798	21.8798	0.0190397	0.835315	3.31768	FALSE	CG7564
FBtr0075184	28.708	28.7836	28.6762	28.924	28.1937	28.685	28.1885	28.2916	0.0704834	0.754065	0.433203	FALSE	CG7484
FBtr0333692;FBtr0075187	25.1739	25.6197	24.3551	25.5897	21.8798	24.8254	21.8798	21.8798	0.0776675	0.74602	2.5684	FALSE	CG7460
FBtr0075191;FBtr0075190	29.6481	29.3376	29.7722	30.4636	29.2535	29.1551	29.1236	29.1442	0.13282	0.687812	0.636293	FALSE	Adgf-A
FBtr0345384;FBtr0075196;FBtr0330162	21.8798	21.8798	21.8798	21.8798	21.8798	21.8798	21.8798	21.8798	0.421923	0	0	FALSE	Crtc
FBtr0075199;FBtr0304977;FBtr0075200	30.4676	30.0948	29.9442	31.4213	29.9234	29.9273	30.2159	29.8039	0.399528	0.48817	0.514365	FALSE	Pep
FBtr0333123;FBtr0075201	26.6576	24.4618	26.6943	28.4663	26.0467	26.7686	26.8359	26.2944	0.939113	0.0378995	0.0835737	FALSE	Vps60
FBtr0333124;FBtr0075205;FBtr0333125;FBtr0075206	21.8798	21.8798	21.8798	21.8798	21.8798	21.8798	21.8798	21.8798	0.421923	0	0	FALSE	CycT
FBtr0075207	29.4892	28.7893	29.4534	29.6298	27.1304	28.1533	24.4421	24.2206	0.0687623	0.756172	3.35386	FALSE	Jon74E
FBtr0075208	27.3112	26.7439	26.6741	29.0573	23.9779	24.1252	25.0083	24.6623	0.0175229	0.838921	3.00321	FALSE	Edc3
FBtr0075209	25.902	22.1895	27.8942	26.1214	21.8798	22.6305	21.8798	25.3978	0.321876	0.546959	2.57981	FALSE	U4-U6-60K
FBtr0075217	30.9197	30.8394	31.9443	29.6303	29.9925	32.0152	31.3012	31.6738	0.609745	0.235171	-0.412252	FALSE	CG7630
FBtr0075218	21.8798	21.8798	21.8798	21.8798	21.8798	21.8798	21.8798	21.8798	0.421923	0	0	FALSE	CG32176
FBtr0075220	31.8952	31.7432	32.1281	31.6515	31.8028	32.3391	32.2756	32.3998	0.242155	0.59866	-0.34983	FALSE	CG7603
FBtr0333691;FBtr0302510;FBtr0302509;FBtr0075222	34.5292	34.323	34.5014	34.151	34.2833	34.6384	34.3635	34.5441	0.58712	0.249497	-0.0811708	FALSE	CG7580
FBtr0075226	21.8798	21.8798	21.8798	21.8798	21.8798	23.1946	21.8798	21.8798	0.421923	0.353553	-0.328714	FALSE	CG12229
FBtr0307343;FBtr0299819;FBtr0075227	28.162	27.6303	27.9013	27.9062	27.5244	27.464	27.092	27.7181	0.134139	0.686613	0.450306	FALSE	CG32174
FBtr0075229	21.8798	21.8798	21.8798	21.8798	21.8798	21.8798	21.8798	21.8798	0.421923	0	0	FALSE	CG33052
FBtr0075231	24.3209	23.0513	26.4458	25.4812	26.1836	24.3672	23.909	22.7397	0.68112	0.191514	0.524952	FALSE	Sec3
FBtr0075238	21.8798	21.8798	21.8798	21.8798	21.8798	21.8798	21.8798	21.8798	0.421923	0	0	FALSE	CG13728
FBtr0309231;FBtr0075240;FBtr0075239	21.8798	21.8798	21.8798	21.8798	21.8798	21.8798	21.8798	21.8798	0.421923	0	0	FALSE	Cad74A
FBtr0075246;FBtr0075245;FBtr0331847	21.8798	21.8798	21.8798	21.8798	21.8798	21.8798	21.8798	21.8798	0.421923	0	0	FALSE	CG6479
FBtr0075249	21.8798	21.8798	21.8798	21.8798	25.8761	24.0948	26.7252	26.7321	0.00663104	0.873723	-3.97727	TRUE	CG6485
FBtr0075251;FBtr0075252	31.5096	31.7664	31.7962	31.349	31.5931	31.8279	31.7945	31.8455	0.421923	0.441998	-0.159994	FALSE	CG6512
FBtr0075261	21.8798	21.8798	21.8798	21.8798	21.8798	21.8798	21.8798	21.8798	0.421923	0	0	FALSE	CG13028
FBtr0075269;FBtr0075267	29.132	28.8842	28.4705	23.1413	29.0078	29.7816	28.467	28.4604	0.421923	0.365914	-1.52223	FALSE	Nc73EF
FBtr0075274	21.8798	21.8798	21.8798	21.8798	23.128	23.5746	23.2853	23.6244	0.000287679	0.918933	-1.52329	FALSE	CG7728
FBtr0075275	26.724	26.9972	26.5818	23.1124	26.9056	27.5544	27.1035	26.9489	0.421923	0.456737	-1.27424	FALSE	Fit2
FBtr0075278	27.8976	26.9454	27.8267	27.927	25.8911	24.7634	26.4087	27.0841	0.100491	0.721354	1.61238	FALSE	beg
FBtr0075283;FBtr0075282	27.2876	27.434	27.051	27.2268	27.4513	26.7754	27.5312	27.8257	0.619114	0.229384	-0.146021	FALSE	rogdi
FBtr0075284	21.8798	21.8798	21.8798	21.8798	27.0382	27.1593	27.0371	27.5015	3.92393e-07	0.934218	-5.30425	TRUE	CG7724
FBtr0075285;FBtr0333861;FBtr0113427;FBtr0290066;FBtr0310006;FBtr0113428;FBtr0310005	22.8266	22.1537	23.1759	23.5058	22.7194	24.5108	21.9461	22.5442	0.985415	0.00894811	-0.0146101	FALSE	Rbp6
FBtr0075286;FBtr0300718	21.8798	21.8798	21.8798	21.8798	21.8798	21.8798	21.8798	21.8798	0.421923	0	0	FALSE	CG14057
FBtr0075290	26.4271	25.3526	26.3156	26.7206	23.2587	26.3658	27.0161	25.9614	0.613398	0.233175	0.553501	FALSE	a10
FBtr0075291	21.8798	21.8798	21.8798	21.8798	21.8798	21.8798	21.8798	21.8798	0.421923	0	0	FALSE	CG6652
FBtr0075295;FBtr0075294;FBtr0075293	21.8798	22.9091	24.2839	23.003	21.8798	23.1517	21.8798	23.7611	0.680124	0.192281	0.350892	FALSE	CG6664
FBtr0332122;FBtr0075297;FBtr0321285	21.8798	21.8798	21.8798	21.8798	21.8798	21.8798	21.8798	21.8798	0.421923	0	0	FALSE	CG3764
FBtr0113174;FBtr0075305;FBtr0075300;FBtr0305577	21.8798	21.8798	21.8798	21.8798	21.8798	21.8798	21.8798	21.8798	0.421923	0	0	FALSE	CG11905
FBtr0113173;FBtr0075304;FBtr0075301	21.8798	21.8798	21.8798	21.8798	21.8798	21.8798	21.8798	21.8798	0.421923	0	0	FALSE	CG11905
FBtr0075306;FBtr0075303;FBtr0075302	21.8798	21.8798	21.8798	21.8798	21.8798	21.8798	21.8798	21.8798	0.421923	0	0	FALSE	CG11905
FBtr0345805;FBtr0075307	23.6562	24.0044	23.8386	23.3404	24.0303	25.5088	27.0752	23.7746	0.313992	0.551819	-1.38734	FALSE	CG13023
FBtr0075308	30.9586	30.8186	30.5585	30.7201	30.048	30.3418	30.2308	30.0162	0.0138036	0.84909	0.604713	FALSE	Rpn12
FBtr0331557;FBtr0075309	35.9787	36.0236	36.2595	35.7227	36.1768	36.0151	36.2226	36.2233	0.421923	0.452685	-0.163303	FALSE	CG4169
FBtr0075313;FBtr0331559;FBtr0345368;FBtr0331558;FBtr0075312	30.8781	31.0849	31.0076	30.5656	28.5656	28.7348	27.9875	29.0413	0.00142726	0.904166	2.30174	TRUE	CG32164;CG32165
FBtr0305084;FBtr0305086;FBtr0333625;FBtr0333626;FBtr0305085;FBtr0075318;FBtr0330190;FBtr0330189	21.8798	21.8798	21.8798	21.8798	21.8798	21.8798	24.9303	21.8798	0.421923	0.353553	-0.762626	FALSE	Dab
FBtr0075319	23.3399	23.3262	26.8299	24.5174	21.8798	21.9197	27.8683	27.8024	0.881242	0.072921	-0.364194	FALSE	CG13031
FBtr0075320	21.8798	21.8798	21.8798	21.8798	21.8798	21.8798	21.8798	21.8798	0.421923	0	0	FALSE	PGRP-SB2
FBtr0075321	21.8798	21.8798	21.8798	21.8798	24.0534	21.8798	21.8798	21.8798	0.421923	0.353553	-0.543417	FALSE	CG9701
FBtr0304018;FBtr0075323;FBtr0075322	25.9562	25.553	22.9375	23.068	27.6898	25.1026	30.0581	23.848	0.421923	0.473507	-2.29598	FALSE	Nrt
FBtr0333607;FBtr0075325;FBtr0075324	27.8663	27.0584	27.8243	29.9668	24.521	23.537	27.7091	27.8948	0.317178	0.549814	2.26344	FALSE	CG9705
FBtr0075327;FBtr0075326	21.8798	24.0975	23.4264	21.8798	22.6298	26.8646	24.7061	26.266	0.230647	0.606943	-2.29576	FALSE	CG9706
FBtr0305912;FBtr0075328	30.539	30.3118	30.2286	31.0168	29.7626	29.839	30.0788	30.0933	0.100491	0.72129	0.580609	FALSE	nudC
FBtr0075329	28.3625	28.4243	28.1318	28.645	27.8753	27.8568	28.3997	28.1033	0.248198	0.594098	0.33212	FALSE	TSG101
FBtr0075330	23.8149	21.8798	21.8798	22.2973	21.8798	21.8798	21.8798	21.8798	0.421923	0.433126	0.58816	FALSE	CG9715
FBtr0344230;FBtr0075333;FBtr0075332	21.8798	21.8798	21.8798	21.8798	21.8798	21.8798	21.8798	21.8798	0.421923	0	0	FALSE	sina
FBtr0075337	25.5938	26.1332	25.0955	26.0005	21.8798	21.8798	21.8798	21.8798	8.67899e-05	0.925129	3.82598	TRUE	CG9951
FBtr0075338	23.7014	23.9292	25.4637	22.657	21.8798	21.8798	23.3987	25.9126	0.629584	0.223106	0.670125	FALSE	Rh4
FBtr0075344;FBtr0075341	25.1158	21.8798	24.4498	23.7192	24.3381	24.4096	22.9405	22.8841	0.888077	0.0691259	0.148085	FALSE	CG9674
FBtr0075345	30.8176	30.9727	30.8633	30.7438	30.4022	30.1671	29.8043	30.0103	0.0114248	0.856494	0.753407	FALSE	Int6
FBtr0333610;FBtr0075346	21.8798	21.8798	21.8798	21.8798	21.8798	21.8798	21.8798	21.8798	0.421923	0	0	FALSE	CG13025
FBtr0075347	25.0732	26.581	25.0786	25.7168	21.8798	21.8798	21.8798	21.8798	0.00081755	0.910826	3.73264	TRUE	Dbp73D
FBtr0075348	29.3075	28.5156	29.23	28.7753	27.875	28.2981	27.8822	27.9937	0.0263171	0.819108	0.944893	FALSE	PGRP-SB1
FBtr0075352;FBtr0075351;FBtr0075353	27.95	27.9779	28.1598	27.9144	27.721	27.9814	27.9537	27.6789	0.32723	0.544191	0.16677	FALSE	zetaCOP
FBtr0075356;FBtr0075355	25.6315	26.1884	26.8747	22.8944	28.7813	27.6161	27.8068	27.6549	0.115416	0.704838	-2.56756	FALSE	Baldspot
FBtr0345369;FBtr0075357;FBtr0112790;FBtr0330130;FBtr0330133;FBtr0330135;FBtr0330134;FBtr0330132;FBtr0330131;FBtr0330136	21.8798	21.8798	21.8798	21.8798	21.8798	21.8798	21.8798	21.8798	0.421923	0	0	FALSE	Abl
FBtr0331560;FBtr0075358	31.0664	31.3297	31.0907	30.3734	30.7872	31.1284	30.6708	31.2485	0.984237	0.00977906	0.00633426	FALSE	Mo25
FBtr0075359	29.1307	29.3902	29.6478	27.7755	29.1095	29.8961	29.2256	29.7528	0.421923	0.385899	-0.509968	FALSE	Su(P)
FBtr0075360	32.1638	32.4114	32.1598	32.6565	31.7389	31.9595	32.2947	32.1782	0.314472	0.551382	0.305075	FALSE	Prosbeta6
FBtr0075361	26.6313	23.8466	24.3034	28.6325	21.8798	21.8798	21.8798	21.8798	0.0561071	0.772216	3.97366	FALSE	CG4098
FBtr0075363	21.8798	21.8798	23.8836	22.6438	21.8798	21.8798	21.8798	21.8798	0.413934	0.479696	0.691968	FALSE	spd-2
FBtr0075365	22.9322	21.8798	23.7822	21.8798	21.8798	21.8798	21.8798	21.8798	0.359886	0.512523	0.738718	FALSE	Syx8
FBtr0075432;FBtr0075370	23.0815	26.5597	24.3588	25.0398	26.9419	26.0072	23.4911	23.9724	0.803858	0.118792	-0.343198	FALSE	CG13041;CG13060
FBtr0075371	21.8798	21.8798	21.8798	21.8798	21.8798	21.8798	23.8868	21.8798	0.421923	0.353553	-0.501757	FALSE	CG13059
FBtr0075375	32.6713	32.5727	32.8978	33.1128	33.2619	33.023	32.8609	32.7875	0.421923	0.371519	-0.169661	FALSE	retinin
FBtr0075376	26.3094	27.8546	27.4017	27.0752	27.1012	27.3733	26.8391	27.967	0.753521	0.148711	-0.159905	FALSE	CG13056
FBtr0075377;FBtr0110866	21.8798	21.8798	21.8798	21.8798	21.8798	21.8798	21.8798	21.8798	0.421923	0	0	FALSE	CG4998
FBtr0075378	21.8798	21.8798	21.8798	21.8798	21.8798	21.8798	21.8798	21.8798	0.421923	0	0	FALSE	CG33257
FBtr0075379	29.8134	29.5731	29.6243	30.2106	28.5973	28.9025	28.8369	28.7456	0.0062338	0.87544	1.03476	FALSE	mRpS34
FBtr0075381	27.8962	27.6326	27.6845	27.5529	26.3398	26.5592	27.2081	27.2103	0.0521692	0.777401	0.862203	FALSE	CG4933
FBtr0075382	25.9997	23.4534	25.086	26.3767	26.2036	25.6275	26.6235	25.752	0.421923	0.409665	-0.822721	FALSE	Cpr72Ea
FBtr0075383	21.8798	21.8798	21.8798	21.8798	21.8798	21.8798	21.8798	21.8798	0.421923	0	0	FALSE	Cpr72Eb
FBtr0075384	28.0721	27.6748	28.4465	27.4213	27.9991	27.7676	28.0359	27.994	0.879243	0.0741793	-0.0454572	FALSE	CG4842
FBtr0333596;FBtr0075387;FBtr0075386	24.2835	21.767	24.3777	25.725	21.8798	21.8798	21.8798	21.8798	0.138001	0.682631	2.15851	FALSE	RAF2
FBtr0075390	27.5178	27.0082	27.296	27.8932	21.8798	21.8798	21.8798	21.8798	4.20081e-06	0.932254	5.54902	TRUE	CG33158
FBtr0075391	21.8798	21.8798	23.5787	21.8798	21.8798	23.9749	21.8798	21.8798	0.909762	0.0559965	-0.0990595	FALSE	st
FBtr0305570;FBtr0305569;FBtr0075394;FBtr0075393;FBtr0330137	28.2377	27.1576	27.3414	28.9828	27.1141	26.7398	27.2271	26.5368	0.194646	0.635277	1.02542	FALSE	mbf1
FBtr0329921;FBtr0075395	27.6181	26.9012	27.0634	28.9076	21.8798	24.4655	21.8798	21.8798	0.00645052	0.874425	5.09637	TRUE	Smn
FBtr0345813;FBtr0075399;FBtr0075398	31.7333	31.7281	31.7189	31.808	31.5749	31.645	31.8001	31.7908	0.547792	0.274041	0.0443813	FALSE	Mipp1
FBtr0075409	21.8798	21.8798	21.8798	21.8798	21.8798	21.8798	21.8798	21.8798	0.421923	0	0	FALSE	dsx-c73A
FBtr0075410	32.1386	32.0958	31.9197	32.6571	30.7988	31.0654	31.0788	30.8666	0.00405016	0.885577	1.25039	FALSE	Aats-tyr
FBtr0075411	26.0734	26.3988	26.014	27.3808	23.9403	26.3534	25.0419	26.3172	0.361831	0.511368	1.05355	FALSE	CG4573
FBtr0075412;FBtr0100477;FBtr0331176;FBtr0075413;FBtr0331175;FBtr0100478	31.4543	31.6636	31.5749	31.0954	31.9317	31.658	31.7128	31.5009	0.346077	0.52368	-0.253793	FALSE	fax
FBtr0075419;FBtr0075418;FBtr0075417;FBtr0308819	28.9751	29.86	29.3801	27.6952	30.3272	30.3144	29.9762	30.0711	0.149076	0.671897	-1.19465	FALSE	CG4729
FBtr0331172;FBtr0075422;FBtr0075421	28.3984	28.7306	28.9672	27.8403	27.175	28.6912	26.6889	25.0463	0.250505	0.592657	1.58377	FALSE	CG4753
FBtr0333265;FBtr0331173;FBtr0075423	21.8798	21.8798	21.8798	21.8798	21.8798	21.8798	21.8798	21.8798	0.421923	0	0	FALSE	roq
FBtr0075424	33.5599	33.2301	33.3696	34.1915	33.5853	33.5304	33.949	33.6702	0.741543	0.155903	-0.0959613	FALSE	Cpr72Ec
FBtr0114536;FBtr0075426;FBtr0114537;FBtr0075427	32.8547	32.7228	33.0569	32.0332	33.7346	33.9776	33.7317	33.9618	0.0158517	0.843099	-1.1845	FALSE	Pdh
FBtr0075428	21.8798	21.8798	21.8798	21.8798	21.8798	21.8798	21.8798	21.8798	0.421923	0	0	FALSE	CG4925
FBtr0310461;FBtr0075431	21.8798	21.8798	21.8798	21.8798	21.8798	21.8798	21.8798	21.8798	0.421923	0	0	FALSE	CG13040
FBtr0075433	27.4799	28.4868	24.1475	27.2105	28.4992	27.7558	23.6155	23.6925	0.638325	0.217994	0.940422	FALSE	CG13042
FBtr0075446	21.8798	21.8798	21.8798	21.8798	30.1244	30.1347	30.587	30.3975	6.01552e-08	0.934923	-8.43112	TRUE	ms(3)72Dt
FBtr0345951;FBtr0301911;FBtr0075449;FBtr0075448;FBtr0333290;FBtr0333291;FBtr0114589;FBtr0075451;FBtr0075450	21.8798	21.8798	21.8798	21.8798	21.8798	21.8798	21.8798	21.8798	0.421923	0	0	FALSE	Taf4
FBtr0333292;FBtr0301912;FBtr0075452	21.8798	21.8798	25.4239	21.8798	21.8798	21.8798	21.8798	21.8798	0.421923	0.353553	0.886035	FALSE	CG12272
FBtr0075453	30.7837	30.9193	30.9798	30.6437	30.8885	30.7206	30.5084	30.5186	0.412538	0.480535	0.172563	FALSE	SsRbeta
FBtr0075457	21.8798	21.8798	21.8798	21.8798	23.8694	22.9048	23.5418	24.095	0.00566199	0.877849	-1.72297	FALSE	CG5027
FBtr0075459	25.9954	25.7528	21.8798	24.2666	26.1359	26.347	26.7158	26.9058	0.220402	0.614664	-2.05248	FALSE	l(3)72Dp
FBtr0075460	24.6541	25.3113	24.0081	23.9343	25.5806	23.0295	24.4182	25.9327	0.774604	0.13623	-0.263337	FALSE	l(3)72Dr
FBtr0075468	23.8365	24.4334	23.4012	23.4026	24.0758	23.5361	21.8798	21.8798	0.399281	0.488414	0.925561	FALSE	CG13065
FBtr0075469	21.8798	21.8798	21.8798	21.8798	21.8798	21.8798	21.8798	21.8798	0.421923	0	0	FALSE	CG4982
FBtr0075470	29.1049	28.9588	29.3038	28.7389	29.5044	29.5876	28.7411	28.3295	0.973546	0.0164383	-0.0140614	FALSE	CG13044
FBtr0075471	29.2384	29.1188	29.3109	28.9866	30.1852	29.0882	29.3464	28.2707	0.909721	0.0560744	-0.0589444	FALSE	CG4962
FBtr0333561;FBtr0075475	28.167	28.4756	28.0931	27.9974	27.503	27.9207	28.4779	27.5097	0.421923	0.441039	0.330421	FALSE	CG13048
FBtr0075477	28.3094	28.3146	28.7076	28.3047	28.1766	28.3593	28.8843	28.4554	0.791997	0.125697	-0.0598112	FALSE	CG13049
FBtr0333563;FBtr0075480	21.8798	21.8798	21.8798	21.8798	21.8798	21.8798	21.8798	21.8798	0.421923	0	0	FALSE	CG13053
FBtr0075483	26.57	26.3064	26.0692	28.0521	23.7754	26.9348	26.8452	26.4803	0.496948	0.305943	0.740511	FALSE	PDCD-5
FBtr0075484;FBtr0333565	27.2668	22.7185	24.0835	26.2002	21.8798	21.8798	21.8798	21.8798	0.0880089	0.734846	3.18746	FALSE	l(3)72Dn
FBtr0075491	24.9527	24.698	23.8073	21.8798	21.8798	21.8798	21.8798	21.8798	0.115416	0.704827	1.95466	FALSE	Trs20
FBtr0075492	34.0489	34.1593	34.1698	33.7988	34.7113	34.637	34.8974	34.8785	0.00491224	0.881128	-0.736825	FALSE	Pgm
FBtr0333294;FBtr0310582;FBtr0310581;FBtr0075494;FBtr0333293;FBtr0075493	28.3454	28.5717	28.1482	28.5074	27.2046	27.0077	26.731	26.8358	0.000878521	0.910141	1.44837	FALSE	Zn72D
FBtr0075495	22.4164	27.1634	22.5684	22.8735	21.8798	23.2897	23.246	22.7388	0.513565	0.295358	0.966841	FALSE	IntS9
FBtr0333599;FBtr0075497	21.8798	21.8798	21.8798	21.8798	21.8798	21.8798	21.8798	21.8798	0.421923	0	0	FALSE	CG5235
FBtr0333600;FBtr0075498	21.8798	21.8798	21.8798	21.8798	21.8798	21.8798	21.8798	21.8798	0.421923	0	0	FALSE	Taspase1
FBtr0333619;FBtr0333618;FBtr0333617;FBtr0075501;FBtr0075500;FBtr0075499	21.8798	21.8798	21.8798	21.8798	21.8798	21.8798	21.8798	21.8798	0.421923	0	0	FALSE	Diap1
FBtr0332133;FBtr0075505	21.8798	21.8798	21.8798	21.8798	21.8798	21.8798	21.8798	21.8798	0.421923	0	0	FALSE	dbo
FBtr0075506	21.8798	21.8798	21.8798	21.8798	21.8798	21.8798	21.8798	21.8798	0.421923	0	0	FALSE	CG12713
FBtr0333572;FBtr0075509	23.396	23.993	21.8798	21.8798	25.6542	21.8798	23.5495	25.1306	0.421923	0.427163	-1.26636	FALSE	GXIVsPLA2
FBtr0333573;FBtr0075510	21.8798	21.8798	21.8798	21.8798	21.8798	21.8798	21.8798	21.8798	0.421923	0	0	FALSE	elgi
FBtr0333574;FBtr0075511	22.5759	21.8798	23.3131	23.6044	24.8145	22.9082	25.3009	23.0275	0.356805	0.514879	-1.16945	FALSE	CG17032
FBtr0075513	27.5576	27.0886	27.3256	26.9406	28.2302	28.2147	28.4589	28.013	0.007883	0.868665	-1.00113	FALSE	CG17026
FBtr0333575;FBtr0075514	28.1575	28.2888	28.1832	27.4463	28.6662	28.9904	29.1967	28.9788	0.0314982	0.80963	-0.939055	FALSE	CG17029
FBtr0333576;FBtr0075516	27.2194	26.581	26.6938	23.1636	27.3964	27.3445	28.2916	27.5373	0.305941	0.556464	-1.72802	FALSE	CG17027
FBtr0075517	28.0956	27.5291	28.4655	26.5777	28.2407	28.345	26.9055	28.2314	0.693291	0.184492	-0.263692	FALSE	Arl1
FBtr0075519	27.1829	24.2545	25.9847	27.8576	26.2958	26.7021	21.8798	21.8798	0.421923	0.457302	2.13055	FALSE	mRpS31
FBtr0333578;FBtr0075520	21.8798	21.8798	21.8798	21.8798	21.8798	21.8798	21.8798	21.8798	0.421923	0	0	FALSE	mib1
FBtr0075521;FBtr0333579	27.9785	28.1194	28.2505	28.4469	28.5066	28.5105	27.7887	28.0567	0.949656	0.031455	-0.016793	FALSE	CG5830
FBtr0075522	27.7034	27.5767	27.9035	28.682	21.8798	21.8798	21.8798	21.8798	1.08888e-05	0.930795	6.08661	TRUE	DNApol-delta
FBtr0075524;FBtr0075523;FBtr0075526;FBtr0075525;FBtr0333580;FBtr0330160	24.2572	22.3826	25.2003	24.4509	23.2088	22.493	24.1098	21.8798	0.39958	0.488094	1.1499	FALSE	brm
FBtr0075527	28.6094	29.3	29.4231	28.9585	27.587	27.5538	26.7719	25.7502	0.023236	0.825637	2.15703	FALSE	l(3)72Ab
FBtr0332134;FBtr0306855;FBtr0075537;FBtr0306854;FBtr0075536	24.3408	21.8343	21.8798	21.8798	21.8798	21.8798	21.8798	21.8798	0.433763	0.346046	0.603885	FALSE	CG18081;CG15715
FBtr0075538;FBtr0304975;FBtr0100528;FBtr0075539	21.8798	21.8798	21.8798	21.8798	21.8798	21.8798	21.8798	21.8798	0.421923	0	0	FALSE	DCP2
FBtr0075542;FBtr0075543;FBtr0075541	26.6351	27.2995	27.1435	26.3512	27.5751	27.7083	27.7339	27.1657	0.129518	0.690826	-0.688464	FALSE	fwe
FBtr0075547	23.306	21.8798	21.8798	23.5842	21.8798	23.4388	21.8798	21.8798	0.599565	0.241813	0.392925	FALSE	CG7275
FBtr0075548	23.9187	24.1157	24.4121	25.7606	24.2123	24.5135	24.2086	23.3637	0.428173	0.34955	0.477237	FALSE	CG7272
FBtr0075553;FBtr0330177;FBtr0303531;FBtr0330176;FBtr0075554	29.5204	29.5392	29.0266	29.767	29.0694	29.618	29.2076	29.0481	0.421923	0.386933	0.227558	FALSE	Eip71CD
FBtr0075559;FBtr0075560;FBtr0331933	29.3099	29.3227	29.6694	29.6353	28.6351	28.7711	28.5407	28.282	0.00612069	0.875928	0.927098	FALSE	AGO2
FBtr0331934;FBtr0075561;FBtr0306156;FBtr0306154;FBtr0306155	23.1023	23.2892	23.9694	21.8798	24.131	21.8798	21.8798	21.8798	0.486885	0.312419	0.617571	FALSE	CG7427
FBtr0332091;FBtr0075562	23.5432	22.6498	22.8795	24.6582	21.8798	21.8798	21.8798	21.8798	0.0634758	0.762632	1.55291	FALSE	dop
FBtr0075563	26.5962	26.2312	25.71	24.9385	27.5616	27.244	26.767	24.0711	0.619083	0.229507	-0.541955	FALSE	CG16979
FBtr0075564	21.8798	24.0279	22.8137	24.608	21.8798	21.8798	21.8798	21.8798	0.17408	0.651104	1.45258	FALSE	CG12301
FBtr0075565;FBtr0075566	29.8849	29.4199	29.6288	29.3237	28.9673	28.7841	28.1455	29.0305	0.0603163	0.766725	0.832415	FALSE	CG12304
FBtr0303510;FBtr0075567;FBtr0075568;FBtr0075569;FBtr0290065;FBtr0332092;FBtr0332093	25.395	21.8798	22.7817	21.8798	21.8798	21.8798	21.8798	21.8798	0.421923	0.445934	1.10429	FALSE	RhoGAP71E
FBtr0075570	21.8798	21.8798	21.8798	21.8798	21.8798	21.8798	21.8798	21.8798	0.421923	0	0	FALSE	CG7372
FBtr0303460;FBtr0075571	21.8798	21.8798	21.8798	21.8798	21.8798	21.8798	21.8798	21.8798	0.421923	0	0	FALSE	Eig71Eb
FBtr0075572	21.8798	21.8798	21.8798	21.8798	21.8798	21.8798	21.8798	21.8798	0.421923	0	0	FALSE	Eig71Ed
FBtr0075573	21.8798	21.8798	21.8798	21.8798	21.8798	21.8798	21.8798	21.8798	0.421923	0	0	FALSE	Eig71Eg
FBtr0332123;FBtr0075574	21.8798	21.8798	21.8798	21.8798	21.8798	21.8798	21.8798	21.8798	0.421923	0	0	FALSE	Eig71Ei
FBtr0075575	21.8798	21.8798	21.8798	21.8798	21.8798	21.8798	21.8798	21.8798	0.421923	0	0	FALSE	Eig71Ek
FBtr0075582	21.8798	21.8798	21.8798	21.8798	21.8798	21.8798	21.8798	21.8798	0.421923	0	0	FALSE	Eig71Ej
FBtr0075584	21.8798	21.8798	21.8798	21.8798	21.8798	21.8798	21.8798	21.8798	0.421923	0	0	FALSE	Eig71Ef
FBtr0075585	21.8798	21.8798	21.8798	21.8798	21.8798	21.8798	21.8798	21.8798	0.421923	0	0	FALSE	Eig71Ee
FBtr0075586	21.8798	21.8798	21.8798	21.8798	21.8798	21.8798	21.8798	21.8798	0.421923	0	0	FALSE	Eig71Ec
FBtr0075587	21.8798	21.8798	21.8798	21.8798	21.8798	21.8798	21.8798	21.8798	0.421923	0	0	FALSE	Eig71Ea
FBtr0075591	21.8798	21.8798	21.8798	21.8798	21.8798	21.8798	21.8798	21.8798	0.421923	0	0	FALSE	CG7650
FBtr0332095;FBtr0075592	21.8798	21.8798	21.8798	21.8798	21.8798	21.8798	21.8798	21.8798	0.421923	0	0	FALSE	CG7656
FBtr0075595	21.8798	21.8798	21.8798	21.8798	21.8798	21.8798	21.8798	21.8798	0.421923	0	0	FALSE	mrn
FBtr0075596	26.9115	27.1134	27.4293	27.2879	26.9988	26.4184	25.792	23.7327	0.248526	0.593886	1.45002	FALSE	CG7739
FBtr0075600;FBtr0075599	23.1392	26.9786	24.508	22.7578	27.7982	27.746	28.1084	28.4752	0.0460054	0.786399	-3.68606	FALSE	CG7945
FBtr0075605	27.7279	27.6561	27.3773	28.0716	26.7294	26.8743	28.3525	26.7108	0.421923	0.434181	0.541482	FALSE	CG7857
FBtr0075607	21.8798	21.8798	22.4058	21.8798	21.8798	21.8798	21.8798	21.8798	0.421923	0.353553	0.131499	FALSE	Tollo
FBtr0306308;FBtr0306307;FBtr0075614	21.8798	21.8798	21.8798	21.8798	21.8798	21.8798	21.8798	21.8798	0.421923	0	0	FALSE	Toll-6
FBtr0332815;FBtr0075617	21.8798	21.8798	21.8798	21.8798	24.2608	23.7853	21.8798	23.4025	0.11419	0.706233	-1.4523	FALSE	CG7804
FBtr0075624	21.8798	21.8798	21.8798	21.8798	21.8798	21.8798	21.8798	21.8798	0.421923	0	0	FALSE	CG5114
FBtr0114529;FBtr0075627;FBtr0075626	24.373	24.0535	23.7155	23.5534	24.621	23.6696	22.7046	21.8798	0.421923	0.393444	0.705092	FALSE	mnd
FBtr0075629	32.0937	32.2021	31.903	32.0963	31.3773	31.1545	31.5274	31.6476	0.0142645	0.847807	0.647079	FALSE	Prosbeta2
FBtr0075632	23.1641	23.67	24.0096	21.2674	21.8798	24.0089	23.4761	22.9766	0.954128	0.0288293	-0.0575394	FALSE	Aats-gly
FBtr0075637	21.8798	21.8798	21.8798	21.8798	21.8798	21.8798	21.8798	21.8798	0.421923	0	0	FALSE	CG13458
FBtr0331830;FBtr0075640	27.6181	27.8028	27.3976	26.3258	27.6111	28.2553	27.7338	27.7984	0.373635	0.504405	-0.563537	FALSE	Pex3
FBtr0075642	22.4162	24.6236	25.9567	26.8318	21.8798	21.8798	21.8798	21.8798	0.080194	0.74298	3.07729	FALSE	Prp31
FBtr0075643	25.0819	21.2085	23.4897	23.0241	26.9625	26.8609	27.031	26.7401	0.0228501	0.826631	-3.69753	FALSE	CG6878
FBtr0075644	21.8798	21.8798	21.8798	21.8798	28.7746	28.1986	27.4261	28.0176	1.72529e-05	0.929877	-6.22447	TRUE	CG6888
FBtr0075645	21.8798	24.4022	21.8798	22.301	23.3842	21.8798	21.8798	23.0473	0.941854	0.0360167	0.067927	FALSE	CG7011
FBtr0075646	26.5993	26.9752	26.6031	26.5379	21.8798	21.8798	21.8798	21.8798	4.01543e-07	0.934201	4.79911	TRUE	Msh6
FBtr0075647	23.4997	22.6469	21.8798	23.7943	21.8798	23.2884	21.8798	23.5411	0.691651	0.185356	0.307933	FALSE	CG32147
FBtr0346644;FBtr0075648	34.5447	34.2747	34.3139	34.5217	34.2792	34.4148	34.0571	34.3378	0.421923	0.455206	0.141513	FALSE	Pdi
FBtr0075665	21.8798	21.8798	21.8798	21.8798	21.8798	21.8798	24.3812	23.4697	0.346597	0.523034	-1.02284	FALSE	CG12310
FBtr0075669	21.8798	21.8798	21.8798	21.8798	25.9362	25.7848	26.2234	24.0657	0.00359559	0.888395	-3.62276	TRUE	Rpn12R
FBtr0075672	29.2535	29.2124	29.233	29.8409	26.8872	27.9523	27.5663	27.9926	0.00869528	0.865841	1.78531	FALSE	mRpL39
FBtr0075677	21.8798	21.8798	21.8798	21.8798	21.8798	21.8798	21.8798	21.8798	0.421923	0	0	FALSE	CG9628
FBtr0333032;FBtr0075679	21.8798	21.8798	21.8798	21.8798	21.8798	21.8798	21.8798	21.8798	0.421923	0	0	FALSE	dlp
FBtr0075685	21.8798	21.8798	21.8798	21.8798	21.8798	21.8798	21.8798	21.8798	0.421923	0	0	FALSE	CG13477
FBtr0075689	21.8798	21.8798	21.8798	21.8798	23.6853	21.8798	21.8798	21.8798	0.421923	0.353553	-0.451376	FALSE	CG13473
FBtr0075691	26.547	23.1966	26.9602	27.1009	21.8798	21.8798	21.8798	21.8798	0.0273233	0.817225	4.0714	FALSE	Tdrd3
FBtr0333075;FBtr0333074;FBtr0075693	23.2994	23.4071	23.7764	25.1424	21.8798	21.8798	21.8798	21.8798	0.0202698	0.832257	2.02655	FALSE	CG9425
FBtr0075695;FBtr0110825	21.8798	24.7702	21.8798	21.8798	23.5161	25.83	23.1214	21.8798	0.471435	0.321864	-0.984459	FALSE	CG17839
FBtr0075697	28.9082	27.8142	26.9579	29.4718	21.8798	21.8798	21.8798	21.8798	0.000524882	0.914606	6.40824	TRUE	gnu
FBtr0333076;FBtr0075698	29.7342	29.08	29.6886	30.0772	27.4179	27.3273	26.3985	26.9823	0.00212528	0.898191	2.61353	TRUE	NHP2
FBtr0075699;FBtr0300190	24.0722	22.085	21.8798	21.8798	21.8798	21.8798	21.8798	21.8798	0.421923	0.390176	0.599424	FALSE	bmm
FBtr0075700	23.2313	22.4032	23.2846	27.1889	25.0888	21.8798	22.2509	23.9539	0.653582	0.208629	0.733635	FALSE	mop
FBtr0100444;FBtr0075708;FBtr0075707;FBtr0075706;FBtr0075704;FBtr0100445;FBtr0075705;FBtr0075703;FBtr0333045;FBtr0333046	21.8798	21.8798	21.8798	24.5856	21.8798	23.8251	23.0664	21.8798	0.921092	0.0490487	-0.106522	FALSE	Trl
FBtr0075712	21.8798	21.8798	21.8798	21.8798	21.8798	21.8798	21.8798	21.8798	0.421923	0	0	FALSE	CG4914
FBtr0075715	21.8798	21.8798	21.8798	21.8798	23.3802	24.3667	22.6601	22.8121	0.0509941	0.779196	-1.42499	FALSE	RecQ5
FBtr0308595;FBtr0075719;FBtr0075718	32.4352	32.6333	33.0909	31.7338	33.2752	33.3714	33.3517	33.0072	0.134555	0.686099	-0.778076	FALSE	Mpcp
FBtr0075722	26.0733	25.3256	25.1516	23.9616	25.9967	25.7847	23.8398	26.2655	0.696377	0.182624	-0.343656	FALSE	Lk
FBtr0075723;FBtr0333037;FBtr0075724	21.8798	21.8798	21.8798	21.8798	21.8798	21.8798	21.8798	21.8798	0.421923	0	0	FALSE	Gbs-70E
FBtr0333042;FBtr0075728;FBtr0333041	21.8798	21.8798	21.8798	21.8798	21.8798	21.8798	21.8798	21.8798	0.421923	0	0	FALSE	stwl
FBtr0075737;FBtr0075736	21.8798	21.8798	21.8798	21.8798	29.9734	30.0263	29.849	28.7665	8.09223e-06	0.931316	-7.77402	TRUE	CG7768
FBtr0075740	21.8798	21.8798	21.8798	21.8798	21.8798	21.8798	21.8798	21.8798	0.421923	0	0	FALSE	CG7924
FBtr0075741;FBtr0321257	21.8798	21.8798	21.8798	21.8798	21.8798	21.8798	21.8798	21.8798	0.421923	0	0	FALSE	CG7906
FBtr0333036;FBtr0333035;FBtr0333034;FBtr0075746;FBtr0075748;FBtr0330178;FBtr0330115;FBtr0075747;FBtr0079733;FBtr0330116;FBtr0330210	21.8798	21.8798	21.8798	21.8798	21.8798	21.8798	21.8798	21.8798	0.421923	0	0	FALSE	D;Sox21a;Sox21b;SoxN
FBtr0075753;FBtr0333020	27.7232	28.811	27.5452	26.0002	26.5421	26.6326	26.4618	26.6579	0.352499	0.518313	0.94632	FALSE	Hml
FBtr0075756	29.6328	29.2128	29.3995	29.5295	28.5645	29.0508	28.4496	28.7761	0.0236194	0.824808	0.733417	FALSE	Gl
FBtr0346645;FBtr0075759	21.8798	21.8798	21.8798	21.8798	21.8798	21.8798	21.8798	21.8798	0.421923	0	0	FALSE	ssp2
FBtr0075762;FBtr0075763;FBtr0075761	30.1096	31.3425	31.0539	30.442	31.1261	30.762	30.9158	30.6477	0.737858	0.158212	-0.125889	FALSE	Hsc70-1
FBtr0075766	33.5524	33.7082	33.3618	34.4231	31.6779	31.3482	31.6983	31.625	0.00170911	0.90156	2.17401	TRUE	26-29-p
FBtr0333050;FBtr0075768	21.8798	21.8798	21.8798	21.8798	21.8798	21.8798	21.8798	21.8798	0.421923	0	0	FALSE	upSET
FBtr0343100;FBtr0304672;FBtr0075769	21.8798	21.8798	21.8798	21.8798	21.8798	21.8798	21.8798	21.8798	0.421923	0	0	FALSE	CG6650
FBtr0075770	21.8798	21.8798	21.8798	21.8798	21.8798	21.8798	21.8798	21.8798	0.421923	0	0	FALSE	CG6661
FBtr0302433;FBtr0075774	21.8798	21.8798	21.8798	21.8798	21.8798	21.8798	21.8798	21.8798	0.421923	0	0	FALSE	CG6833
FBtr0075775;FBtr0334053;FBtr0075776;FBtr0114573	21.8798	21.8798	21.8798	21.8798	21.8798	25.7517	21.8798	21.8798	0.421923	0.353553	-0.96797	FALSE	CG32138
[truncated: 5,953 more rows]
