# Supplementary material for: The developmental proteome of Drosophila melanogaster
Source: HighWire-hosted journal article supplement (doi:10.1101/gr.213694.116), 2017-04-05
Supplement: Supplemental_Tables.zip [file Supplemental_Table_S7.xlsx]

## Sheet: Sheet1
	Ayf_1	Ayf_2	Ayf_3	Ayf_4	Aym_1	Aym_2	Aym_3	Aym_4	pval	es	fc	de	gene
FBtr0307555;FBtr0307554;FBtr0070000	21.8798	21.8798	21.8798	21.8798	24.6135	22.985	24.7044	21.8798	0.32139	0.660778	-1.66588	FALSE	Nep3
FBtr0303256;FBtr0070006;FBtr0343173	28.4868	27.6078	27.8012	28.5948	27.9911	28.3042	27.6325	27.6663	0.61223	0.279884	0.224124	FALSE	CG9572
FBtr0070007	32.8316	32.5721	32.9944	32.603	32.6343	32.6296	32.5958	32.347	0.500905	0.519914	0.198571	FALSE	CG9577
FBtr0070008	27.1159	27.1376	23.2967	24.267	23.5968	26.8403	27.1521	23.7616	0.96086	0.0323505	0.116645	FALSE	CG9578
FBtr0070026	28.9838	28.8164	28.8133	28.6927	29.0978	28.5224	29.0262	29.1843	0.587461	0.296452	-0.131135	FALSE	CG9581
FBtr0333549;FBtr0303258;FBtr0070028;FBtr0333548	26.1777	27.9425	22.7513	27.3415	27.959	28.1153	28.0425	27.7083	0.500905	0.519483	-1.903	FALSE	Rab35
FBtr0070038	28.1099	28.2507	27.8785	27.9294	28.3202	28.0679	28.5915	28.2979	0.434464	0.59571	-0.277251	FALSE	alpha-Cat
FBtr0331408;FBtr0070041;FBtr0070040	32.7532	33.3346	32.8912	33.3688	33.3168	33.1019	32.9755	32.7848	0.894721	0.0837863	0.0421883	FALSE	CG32230
FBtr0345139;FBtr0345138;FBtr0344974;FBtr0111141;FBtr0070044;FBtr0070043;FBtr0070042	31.844	31.8997	31.8175	31.6132	32.1118	31.8491	31.8486	31.7216	0.563427	0.311502	-0.089218	FALSE	CkIIalpha
FBtr0070045	25.0811	25.2228	25.7214	25.6852	25.5109	25.0017	25.9834	25.9523	0.671324	0.241699	-0.184439	FALSE	CG33217
FBtr0070046	21.8798	21.8798	25.6829	23.9791	21.8798	21.8798	21.8798	21.8798	0.500905	0.51235	1.47562	FALSE	CG32350
FBtr0070057;FBtr0070053;FBtr0070050;FBtr0345920;FBtr0070056;FBtr0070054;FBtr0070051	21.8798	21.8798	21.8798	21.8798	28.4488	28.3564	28.3048	28.3299	2.34558e-09	0.935348	-6.48022	TRUE	CG17450;CG32820;CG32819
FBtr0077374;FBtr0070055;FBtr0070052	29.2185	28.9848	28.4207	28.9708	28.6357	28.921	28.5101	28.4721	0.500905	0.448377	0.264003	FALSE	CG32500;CG33502;CG32857
FBtr0070062;FBtr0070061;FBtr0070060;FBtr0070059;FBtr0070058	32.8655	32.8679	32.7971	32.6645	32.743	32.7998	32.6013	32.6202	0.500905	0.509888	0.107669	FALSE	CG14476
FBtr0070063;FBtr0332992	21.8798	21.8798	21.8798	21.8798	21.8798	21.8798	21.8798	21.8798	0.500905	0	0	FALSE	G9a
FBtr0070065;FBtr0070064	29.1071	28.8888	29.5124	29.2826	29.2783	28.5716	29.4556	29.6777	0.91677	0.0670015	-0.0480645	FALSE	cin
FBtr0344149;FBtr0342962;FBtr0070068;FBtr0070067;FBtr0070066	29.0738	29.2676	28.9495	29.664	26.4808	27.6162	26.3358	27.085	0.013996	0.884019	2.35926	FALSE	CG3777
FBtr0070069	21.8798	21.8798	21.8798	21.8798	21.6288	21.8798	23.5995	24.7274	0.500905	0.481194	-1.0791	FALSE	CG12470
FBtr0070071	28.0173	28.0561	27.9255	27.9749	29.2138	29.9577	28.046	28.694	0.324071	0.658402	-0.984436	FALSE	y
FBtr0070079	23.5014	26.0723	26.1147	26.0703	26.2198	25.8303	26.2034	26.3193	0.500905	0.375638	-0.703549	FALSE	CG3156
FBtr0070088	29.0882	29.0463	29.4288	29.376	29.2512	29.0563	28.9645	28.8288	0.500905	0.50905	0.209621	FALSE	arg
FBtr0334033;FBtr0100476;FBtr0100475;FBtr0070090;FBtr0070089	21.8798	22.9597	23.1732	21.8798	24.8312	23.2752	23.9542	24.406	0.170967	0.761027	-1.64355	FALSE	CG4293
FBtr0114366;FBtr0100254;FBtr0307173;FBtr0070091	28.4183	28.1449	28.7024	28.1928	28.0943	28.362	28.146	28.23	0.500905	0.388037	0.156527	FALSE	elav
FBtr0070093;FBtr0070092	32.0016	31.7716	31.8941	32.0526	31.5257	31.8165	31.8296	31.7038	0.369593	0.632295	0.211037	FALSE	CG17896
FBtr0070094	21.8798	23.7515	21.8798	21.8798	21.8798	21.8798	22.9316	23.2353	0.890121	0.0868713	-0.133913	FALSE	CG18273
FBtr0070098;FBtr0339442;FBtr0339443	21.8798	21.8798	21.8798	21.8798	21.8798	21.8798	21.8798	21.8798	0.500905	0	0	FALSE	ebo
FBtr0070099	32.874	33.4605	33.3929	33.3594	33.5314	33.3392	33.5583	33.7948	0.500905	0.541348	-0.284202	FALSE	Cyp4g1
FBtr0070100	21.8798	21.8798	21.8798	21.8798	21.8798	21.8798	21.8798	21.8798	0.500905	0	0	FALSE	pcl
FBtr0070107;FBtr0070108;FBtr0340207	21.8798	21.8798	23.4779	21.8798	21.8798	21.8798	21.8798	21.8798	0.500905	0.353553	0.399538	FALSE	CG3038
FBtr0307292;FBtr0307294;FBtr0070109;FBtr0307295;FBtr0307293;FBtr0307291	21.8798	21.8798	21.8798	21.8798	23.0523	24.4123	25.3786	23.5514	0.0850367	0.814797	-2.21887	FALSE	Appl
FBtr0070115	27.7003	27.2761	28.4597	28.5427	27.8297	27.8935	28.2416	28.0095	0.997762	0.00136709	0.00114061	FALSE	CG13369
FBtr0070117;FBtr0070118;FBtr0070116	21.8798	21.8798	21.8798	21.8798	21.8798	21.8798	21.8798	21.8798	0.500905	0	0	FALSE	CG17829
FBtr0070119	25.5853	27.1175	26.4925	25.9882	27.0299	24.9237	25.1045	26.6295	0.701273	0.221566	0.373997	FALSE	l(1)1Bi
FBtr0340081;FBtr0340082;FBtr0070120	21.8798	21.8798	21.8798	21.8798	21.8798	21.8798	21.8798	21.8798	0.500905	0	0	FALSE	su(s)
FBtr0343564;FBtr0070122;FBtr0308651	21.8798	21.8798	21.8798	21.8798	24.0699	24.5683	21.8798	21.8798	0.500905	0.536344	-1.21965	FALSE	Roc1a
FBtr0345314;FBtr0100530;FBtr0070129;FBtr0070128;FBtr0070127;FBtr0070126;FBtr0070125;FBtr0070124;FBtr0070123	29.9109	29.5546	29.8623	30.0827	29.3427	29.214	29.4527	29.4453	0.11263	0.79572	0.488978	FALSE	SkpA
FBtr0340197;FBtr0340196;FBtr0302260;FBtr0302259;FBtr0070133;FBtr0070132;FBtr0070130;FBtr0070131;FBtr0340195	25.8802	25.2747	25.379	25.4415	26.428	25.6255	26.2694	26.5298	0.23812	0.720767	-0.719323	FALSE	sdk
FBtr0070134;FBtr0343759	28.1746	28.4111	29.0018	28.8861	27.9957	28.1877	28.5529	28.5471	0.500905	0.423486	0.297593	FALSE	CG5254
FBtr0335403;FBtr0070139	21.8798	21.8798	21.8798	21.8798	21.8798	21.8798	21.8798	21.8798	0.500905	0	0	FALSE	tw
FBtr0343325;FBtr0070140	23.6001	26.4396	25.4078	21.8798	25.3328	24.0118	25.7931	25.7794	0.584871	0.297979	-0.897418	FALSE	CG16989
FBtr0070141;FBtr0310162	28.8286	29.5945	29.1959	29.1289	29.689	29.1518	29.6412	29.6047	0.500905	0.526181	-0.334685	FALSE	Sec22
FBtr0070146	21.8798	25.7335	22.8556	21.8798	25.7183	24.1562	24.0941	26.0445	0.49617	0.560455	-1.91611	FALSE	Rbf
FBtr0070147	22.6393	22.5598	21.8798	21.8798	21.8798	24.0218	21.8118	24.1692	0.500905	0.374585	-0.730983	FALSE	CG13360
FBtr0070148	33.5269	33.3969	33.8208	34.219	33.0685	33.3994	33.7952	33.7121	0.500905	0.354667	0.247107	FALSE	RpL22
FBtr0070150	21.8798	21.8798	21.8798	21.8798	21.8798	21.8798	21.8798	21.8798	0.500905	0	0	FALSE	CG13362
FBtr0345321;FBtr0070158;FBtr0070157;FBtr0070156;FBtr0070155	31.9877	32.3007	32.5097	32.4542	31.8318	32.6755	32.6177	32.2504	0.937183	0.0515849	-0.0307625	FALSE	RpL36
FBtr0070160	24.0485	26.8844	25.4668	25.8421	26.2212	25.2914	23.5277	26.0097	0.827218	0.132921	0.297933	FALSE	CG13365
FBtr0339434;FBtr0339431;FBtr0339432;FBtr0070161;FBtr0339433;FBtr0339430;FBtr0110791	21.8798	21.8798	21.8798	21.8798	21.8798	21.8798	21.8798	21.8798	0.500905	0	0	FALSE	CG13366
FBtr0310165;FBtr0070164	21.8798	21.8798	21.8798	21.8798	21.8798	21.8798	21.8798	21.8798	0.500905	0	0	FALSE	CG11663
FBtr0070165	21.8798	21.8798	21.8798	21.8798	21.8798	21.8798	21.8798	21.8798	0.500905	0	0	FALSE	MED22
FBtr0332589;FBtr0307182;FBtr0070169;FBtr0070168;FBtr0070167	22.9772	23.4081	23.9233	24.6843	23.6064	23.3646	23.9205	26.5922	0.623404	0.272665	-0.622682	FALSE	TRAM
FBtr0070173	21.8798	21.8798	21.8798	21.8798	21.8798	21.8798	21.8798	21.8798	0.500905	0	0	FALSE	CG3021
FBtr0070175	27.8772	27.3344	27.7867	27.472	27.0745	27.8894	27.1872	27.3473	0.500905	0.382466	0.243015	FALSE	CG14630
FBtr0070176;FBtr0302884	21.8798	21.8798	21.8798	21.8798	21.8798	21.8798	21.8798	21.8798	0.500905	0	0	FALSE	su(w[a])
FBtr0070179	32.0304	31.5207	31.6309	31.6018	30.8022	31.0767	30.8029	30.9005	0.025401	0.868279	0.800337	FALSE	CG14629
FBtr0331340;FBtr0113327;FBtr0070181;FBtr0331339	21.845	21.8798	21.8798	21.8798	21.8798	25.0812	25.4018	23.9898	0.256154	0.702501	-2.21705	FALSE	CG3655
FBtr0070182	21.8798	21.8798	21.8798	21.8798	21.8798	21.8798	21.8798	21.8798	0.500905	0	0	FALSE	CDC45L
FBtr0342734;FBtr0070185	21.8798	21.8798	21.8798	21.8798	21.8798	21.8798	21.8798	21.8798	0.500905	0	0	FALSE	CG3690
FBtr0070186	32.156	32.0883	32.389	32.2286	31.6964	31.8117	31.9337	31.8493	0.0589095	0.834539	0.392696	FALSE	CG3699
FBtr0070188	26.6291	24.735	25.6636	23.6728	21.8798	25.1706	22.5479	24.9757	0.500905	0.478724	1.53161	FALSE	CG3704
FBtr0070189	21.8798	21.8798	21.8798	21.8798	21.8798	21.8798	21.8798	21.8798	0.500905	0	0	FALSE	CG3706
FBtr0345513;FBtr0310611;FBtr0070197	28.6954	28.1292	28.4934	28.9842	26.9382	28.3148	27.3881	28.1644	0.341446	0.64779	0.87417	FALSE	CG11378
FBtr0070200	23.2796	21.8798	22.5972	24.4099	21.8798	22.3683	23.3368	21.8798	0.500905	0.370896	0.675457	FALSE	CG14626
FBtr0345506;FBtr0070201	21.8798	21.8798	21.8798	21.8798	21.8798	21.8798	21.8798	21.8798	0.500905	0	0	FALSE	CG11380
FBtr0070202	21.8798	21.8798	21.8798	21.8798	21.8798	21.8798	21.8798	21.8798	0.500905	0	0	FALSE	CG14625
FBtr0070203	21.8798	21.8798	21.8798	21.8798	21.8798	21.8798	21.8798	21.8798	0.500905	0	0	FALSE	CG11381
FBtr0070204	21.8798	21.8798	21.8798	21.8798	21.8798	21.8798	21.8798	21.8798	0.500905	0	0	FALSE	CG14624
FBtr0342728;FBtr0070205	21.8798	21.8798	21.8798	21.8798	21.8798	21.8798	21.8798	21.8798	0.500905	0	0	FALSE	CG11382
FBtr0070207	21.8798	21.8798	21.8798	21.8798	21.8798	21.8798	21.8798	21.8798	0.500905	0	0	FALSE	fs(1)N
FBtr0310619;FBtr0070209	22.9792	26.0972	25.9262	25.5876	25.6199	25.784	26.2431	23.7892	0.888116	0.0885162	-0.211464	FALSE	CG11412
FBtr0070212	21.8798	21.8798	21.8798	21.8798	21.8798	21.8798	21.8798	21.8798	0.500905	0	0	FALSE	CG11417
FBtr0070213	21.8798	21.8798	21.8798	21.8798	21.8798	21.8798	21.8798	21.8798	0.500905	0	0	FALSE	CG14770
FBtr0339774;FBtr0070215;FBtr0339773	28.0074	26.2228	26.9657	28.0484	27.3835	27.2764	27.3523	27.8026	0.84801	0.118368	-0.14264	FALSE	ssx
FBtr0070218;FBtr0070217;FBtr0070216	26.6933	27.3412	27.4778	26.8968	27.2008	27.4297	27.2542	27.5495	0.500905	0.431835	-0.256273	FALSE	AMPKalpha
FBtr0070225;FBtr0332291;FBtr0332292	24.4038	23.8783	24.8524	21.8798	23.4786	25.0136	21.8798	23.1115	0.794669	0.156589	0.382659	FALSE	CG11448
FBtr0070230	28.8185	29.3045	29.3634	29.2281	29.333	28.8872	29.576	29.6069	0.579384	0.300837	-0.172127	FALSE	CG14786
FBtr0070233	28.3843	27.697	27.6759	27.3223	27.8653	27.644	27.8233	27.6211	0.936857	0.052039	0.0314702	FALSE	CG3719
FBtr0070234	21.8798	21.8798	21.8798	21.8798	21.8798	21.8798	21.8798	21.8798	0.500905	0	0	FALSE	png
FBtr0332287;FBtr0342738;FBtr0070235	21.8798	21.8798	21.8798	21.8798	24.5181	22.8801	24.1721	24.6436	0.0402768	0.851482	-2.1737	FALSE	CG12773
FBtr0332288;FBtr0070236	27.2028	27.8809	27.3094	23.2486	26.9789	24.8205	26.5508	27.4473	0.983679	0.0123036	-0.0389504	FALSE	CG11418
FBtr0342730;FBtr0070238	21.8798	22.9505	21.8798	21.8798	21.8798	23.2305	21.8798	21.8798	0.923068	0.0618988	-0.0700005	FALSE	CG11409
FBtr0070241;FBtr0342731;FBtr0310283;FBtr0310282;FBtr0070239;FBtr0303264	21.8798	21.8798	21.8798	21.8798	21.8798	21.8798	21.8798	23.4763	0.500905	0.353553	-0.399127	FALSE	DAAM
FBtr0070245	21.8798	21.8798	21.8798	21.8798	21.8798	21.8798	21.8798	21.8798	0.500905	0	0	FALSE	CG11403
FBtr0070251	21.8798	21.8798	21.8798	21.8798	21.8798	21.8798	21.8798	21.8798	0.500905	0	0	FALSE	CG11384
FBtr0345508;FBtr0339577;FBtr0339576;FBtr0300352;FBtr0070253	21.8798	21.8798	21.8798	21.8798	23.6503	23.745	21.8223	22.1117	0.477143	0.571819	-0.952539	FALSE	CG14777
FBtr0070256;FBtr0070255	21.8798	24.5119	23.7682	23.7606	23.8052	22.7809	26.5061	26.2719	0.500905	0.428783	-1.36089	FALSE	pck
FBtr0070258;FBtr0339588	21.8798	21.8798	21.8798	21.8798	21.8798	21.8798	21.8798	21.8798	0.500905	0	0	FALSE	mei-38
FBtr0339589;FBtr0070259	26.8181	27.4006	27.0853	27.3668	27.6923	23.3778	27.5634	27.4105	0.687422	0.230431	0.656736	FALSE	rush
FBtr0339591;FBtr0339590;FBtr0070260	26.0203	21.8798	23.1595	22.8348	22.4967	21.8798	21.8798	21.8798	0.500905	0.509651	1.4396	FALSE	inc
FBtr0332293;FBtr0300428;FBtr0300427;FBtr0070263;FBtr0070261;FBtr0330406	21.8798	21.8798	21.8798	21.8798	21.8798	21.8798	21.8798	21.8798	0.500905	0	0	FALSE	br
FBtr0070269	23.4112	25.677	23.5565	24.7366	25.7572	23.5323	26.0753	25.8217	0.500905	0.409619	-0.951267	FALSE	dor
FBtr0333115;FBtr0070270	21.8798	21.8798	21.8798	21.8798	21.8798	21.8798	21.8798	21.8798	0.500905	0	0	FALSE	hfw
FBtr0070272	26.7332	25.8551	23.3847	22.4037	26.4151	27.7651	26.0334	26.7657	0.446984	0.588979	-2.15066	FALSE	b6
FBtr0343517;FBtr0070284;FBtr0303587	21.8798	21.8798	21.8798	21.8798	22.9594	23.4952	22.7921	23.4579	0.0122189	0.887145	-1.29636	FALSE	Mur2B
FBtr0339594;FBtr0339593;FBtr0070290;FBtr0070289	34.2054	34.3034	34.3348	34.0537	33.8765	34.1668	34.2049	33.98	0.500905	0.526954	0.167278	FALSE	sta
FBtr0070296	21.8798	24.5006	21.8798	21.8798	21.8798	21.8798	21.8798	21.8798	0.500905	0.353553	0.655217	FALSE	O-fut2
FBtr0339578;FBtr0070297	26.6148	26.8618	26.2116	25.3154	24.1981	23.717	25.613	23.7019	0.168677	0.762506	1.94342	FALSE	Ns3
FBtr0070298	28.6577	29.2394	28.2099	27.6553	29.5229	29.2479	29.5333	28.2858	0.500905	0.50737	-0.7069	FALSE	CG14787
FBtr0305499;FBtr0070300;FBtr0309961;FBtr0070299;FBtr0305498;FBtr0307895;FBtr0339272	24.3794	25.1705	24.0948	23.7477	25.1936	23.1887	25.4228	24.8798	0.727583	0.203996	-0.323103	FALSE	Adar
FBtr0070308	23.5523	21.8798	23.723	24.0109	24.4781	23.036	21.8798	25.297	0.790487	0.159776	-0.381217	FALSE	MED18
FBtr0339600;FBtr0070310	21.8798	21.8798	21.8798	21.8798	21.8798	21.8798	21.8798	21.8798	0.500905	0	0	FALSE	CG14803
FBtr0070311	26.3347	27.0923	27.22	27.724	27.7301	27.9207	27.923	27.9437	0.270797	0.692687	-0.786633	FALSE	Vps26
FBtr0070312	25.7643	26.3121	26.1238	25.8235	24.2904	26.0399	25.9036	25.9011	0.500905	0.378795	0.472168	FALSE	CG14805
FBtr0331384;FBtr0070313	26.4656	25.5509	26.0027	26.2121	22.5944	25.7074	25.9285	25.8833	0.500905	0.420354	1.02944	FALSE	CG14806
FBtr0332579;FBtr0070314	29.0098	29.2209	29.2377	29.1477	29.3005	29.7023	29.6524	28.8739	0.500905	0.397501	-0.228266	FALSE	mRpL16
FBtr0070315	26.1372	25.8276	25.8339	26.525	23.3673	26.0852	25.6042	26.436	0.50154	0.35283	0.707709	FALSE	mip130
FBtr0344155;FBtr0070316	28.2496	28.6755	28.7984	28.7858	28.7132	28.0183	29.2188	29.2317	0.73315	0.200062	-0.168144	FALSE	Rbcn-3B
FBtr0332586;FBtr0070317	21.8798	21.8798	24.5516	22.6066	26.1378	25.692	25.3739	25.6664	0.0703552	0.825408	-2.98811	FALSE	Ocrl
FBtr0070319;FBtr0070318;FBtr0332588;FBtr0332587;FBtr0070320	22.6656	23.1862	24.3185	26.2011	23.9644	21.8798	24.3941	23.4936	0.653235	0.253596	0.659857	FALSE	CG11596
FBtr0070321	25.8485	24.9893	26.0877	23.9862	23.0003	25.412	23.5062	24.6794	0.500905	0.484843	1.07847	FALSE	CG3587
FBtr0070328	21.8798	21.8798	21.8798	21.8798	21.8798	21.8798	21.8798	21.8798	0.500905	0	0	FALSE	CG4194
FBtr0344156;FBtr0070330	21.8798	21.8798	21.8798	21.8798	21.8798	21.8798	21.8798	21.8798	0.500905	0	0	FALSE	CG4061
FBtr0070331	27.5567	27.6461	27.1086	27.1576	27.248	28.0706	27.9384	27.0587	0.625739	0.271305	-0.211671	FALSE	CG4045
FBtr0302435;FBtr0300255;FBtr0300254;FBtr0070336;FBtr0070335;FBtr0070334;FBtr0070337	30.2443	30.319	30.2245	30.3308	30.2466	30.6872	30.5076	30.2726	0.500905	0.45984	-0.148834	FALSE	CG4199
FBtr0070339	21.8798	21.8798	21.8798	21.8798	21.8798	21.8798	21.8798	21.8798	0.500905	0	0	FALSE	CG4281
FBtr0070344;FBtr0310657	21.8798	21.8798	21.8798	21.8798	21.8798	24.2067	23.8963	21.8798	0.500905	0.538232	-1.08587	FALSE	Actn
FBtr0333802;FBtr0310659;FBtr0310658;FBtr0070345	28.504	29.0694	28.0259	27.4616	29.0181	23.5849	28.2664	28.4616	0.641377	0.261936	0.932489	FALSE	Actn
FBtr0333803;FBtr0070346	25.2655	25.4063	25.1183	25.2487	22.6885	26.0059	25.985	25.2718	0.831554	0.130573	0.271894	FALSE	usp
FBtr0070347	26.264	26.2663	24.0374	21.8798	26.661	26.7418	26.9289	26.304	0.463653	0.579357	-2.04705	FALSE	CG4406
FBtr0070349	21.8798	21.8798	21.8798	21.8798	21.8798	21.8798	21.8798	21.8798	0.500905	0	0	FALSE	CG3857
FBtr0070351;FBtr0070350	27.9817	28.625	28.4055	28.0535	28.1796	27.5582	28.4583	28.5722	0.867811	0.10354	0.074363	FALSE	eIF2B-epsilon
FBtr0305583;FBtr0070354;FBtr0070353;FBtr0070352;FBtr0332580	21.8798	21.8798	21.8798	21.8798	21.8798	21.8798	25.0399	21.8798	0.500905	0.353553	-0.790026	FALSE	Edem1
FBtr0070362;FBtr0070363	21.8798	21.8798	21.8798	21.8798	21.8798	21.8798	21.8798	21.8798	0.500905	0	0	FALSE	trr
FBtr0345510;FBtr0070365	29.058	29.1118	29.2447	29.5207	29.0054	28.5679	28.817	28.3799	0.210983	0.738227	0.541262	FALSE	CG14817
FBtr0070366;FBtr0339601	28.8812	29.1597	28.9441	28.9487	28.9124	28.9373	28.7027	28.8865	0.500905	0.495574	0.123724	FALSE	Pgam5
FBtr0070367;FBtr0070368	23.4839	24.3134	21.8798	24.2535	24.3085	21.8798	23.3008	24.1459	0.957239	0.0355402	0.073902	FALSE	Pex5
FBtr0070369;FBtr0339494;FBtr0070370	21.8798	21.8798	21.8798	21.8798	21.8798	21.8798	21.8798	21.8798	0.500905	0	0	FALSE	CG14814
FBtr0301926;FBtr0070371	30.3164	30.7755	30.5458	30.6027	30.8568	30.6639	30.5449	30.7241	0.500905	0.410358	-0.137354	FALSE	deltaCOP
FBtr0333511;FBtr0070372	26.6512	22.9752	27.3837	25.5979	21.8798	21.8798	21.8798	21.8798	0.11877	0.792746	3.77221	FALSE	CG14812
FBtr0333754;FBtr0070377;FBtr0070376;FBtr0333755	21.8798	21.8798	21.8798	21.8798	21.8798	21.8798	21.8798	21.8798	0.500905	0	0	FALSE	Unc-76
FBtr0070378;FBtr0333260	21.8798	21.8798	21.8798	22.8756	26.0694	21.8798	24.6908	23.9186	0.378463	0.626754	-2.0109	FALSE	csw
FBtr0070383;FBtr0070382;FBtr0070381	30.4049	30.7128	30.6736	30.663	30.217	30.1629	30.2534	30.1343	0.0355001	0.857042	0.421665	FALSE	CG3835
FBtr0331410;FBtr0070384	32.7727	32.8288	32.7821	32.636	32.6777	32.5414	32.7802	32.8627	0.758801	0.182976	0.0394518	FALSE	Pgd
FBtr0310501;FBtr0310500;FBtr0070385	23.0716	23.3177	26.5548	26.811	26.706	23.291	25.116	23.1245	0.860484	0.109244	0.379371	FALSE	CG3630
FBtr0343049;FBtr0070386	31.6039	31.2523	31.3625	31.8057	30.9956	31.4607	31.0103	31.0697	0.369593	0.631944	0.372019	FALSE	CG3621
FBtr0345609;FBtr0070387	26.4307	25.932	27.0055	26.1974	24.8615	22.5384	25.7359	26.7301	0.500905	0.498518	1.4249	FALSE	Cyp4d2
FBtr0070389	27.2699	26.8975	27.3	26.9206	27.083	26.9773	27.1616	27.1532	0.984873	0.0104945	0.00321141	FALSE	pn
FBtr0345607;FBtr0070390	24.1438	23.8242	27.632	27.4293	23.5755	27.492	27.22	27.3545	0.768971	0.175435	-0.653146	FALSE	CG17776
FBtr0342765;FBtr0070393	21.8798	21.8798	22.461	21.8798	24.5252	21.8798	21.8798	23.6124	0.500905	0.465901	-0.949199	FALSE	Mct1
FBtr0070396	21.8798	21.8798	21.8798	21.8798	21.8798	21.8798	21.8798	21.8798	0.500905	0	0	FALSE	fs(1)K10
FBtr0070398	21.8798	21.8798	23.8047	21.8798	24.5253	21.8798	28.241	28.0399	0.418279	0.603836	-3.3105	FALSE	CG3071
FBtr0344007;FBtr0070401	21.8798	21.8798	21.8798	21.8798	21.8798	21.8798	21.8798	21.8798	0.500905	0	0	FALSE	phl
FBtr0307285;FBtr0307284;FBtr0070404;FBtr0070403;FBtr0070402;FBtr0343597	26.549	24.9276	26.8421	25.8056	25.8322	23.9924	27.0056	26.8465	0.936449	0.0523914	0.111874	FALSE	ptr
FBtr0333730;FBtr0070405	28.2206	28.393	28.468	28.5121	27.8468	28.7203	28.1954	28.5764	0.850185	0.116666	0.0637238	FALSE	mRpL14
FBtr0300792;FBtr0070411	31.6341	31.7297	31.5971	31.4316	32.0552	32.12	31.7812	31.959	0.114379	0.794878	-0.380707	FALSE	CG2918
FBtr0346648;FBtr0345315;FBtr0300793;FBtr0070412	21.8798	21.8798	21.8798	21.8798	21.8798	21.8798	21.8798	21.8798	0.500905	0	0	FALSE	CG2924
FBtr0345316;FBtr0070414	21.8798	21.8798	21.8798	21.8798	21.8798	21.8798	21.8798	21.8798	0.500905	0	0	FALSE	temp
FBtr0342767;FBtr0070416	26.7398	26.714	26.7081	26.369	26.0816	24.7983	26.5057	24.5133	0.341334	0.648005	1.15796	FALSE	CG3091
FBtr0342768;FBtr0070417	23.7028	21.8798	21.8863	22.7358	21.8798	21.8798	21.8798	21.8798	0.500905	0.500058	0.671411	FALSE	CG3191
FBtr0070418	25.5835	25.9629	25.1455	24.2673	26.433	25.8453	25.9174	26.5012	0.348775	0.643513	-0.934456	FALSE	crn
FBtr0342769;FBtr0070419	24.5932	25.0677	22.9742	21.8798	21.8798	21.8798	21.8798	22.7262	0.437294	0.593239	1.53733	FALSE	kz
FBtr0342771;FBtr0342770;FBtr0070420	33.3715	33.2454	33.4046	33.3151	33.3836	33.3028	33.2316	33.27	0.605292	0.284536	0.0371841	FALSE	Vinc
FBtr0070421	26.5048	26.4375	25.9931	25.72	25.2311	26.2978	26.4187	26.4055	0.894424	0.0839836	0.0755748	FALSE	msta
FBtr0345599;FBtr0070422	23.5759	25.8428	26.1078	25.9644	25.8629	26.3817	25.9532	26.3038	0.500905	0.418193	-0.752689	FALSE	msta
FBtr0070423	27.8366	28.6754	28.0793	27.6879	28.0268	27.9796	27.8779	28.3736	0.987884	0.0084002	0.00533598	FALSE	CG18031
FBtr0070425	24.2722	23.5011	25.0904	25.095	23.1747	21.8798	21.8798	24.0691	0.282487	0.686301	1.73885	FALSE	Nmd3
FBtr0070426;FBtr0310077	21.8798	21.8798	21.8798	21.8798	21.8798	21.8798	21.8798	21.8798	0.500905	0	0	FALSE	Cyp4d14
FBtr0070427	23.6539	26.099	26.7114	24.2603	22.8739	26.0023	25.6973	24.9414	0.855327	0.113144	0.302431	FALSE	Cyp4d1
FBtr0070428	21.8798	21.8798	21.8798	21.8798	21.8798	21.8798	21.8798	21.8798	0.500905	0	0	FALSE	Cyp4d1
FBtr0070430;FBtr0344159;FBtr0070429	21.8798	21.8798	21.8798	21.8798	21.8798	21.8798	21.8798	21.8798	0.500905	0	0	FALSE	wapl
FBtr0070431	28.7696	28.6914	28.8084	28.6307	28.8391	28.4114	28.588	28.2605	0.500905	0.49654	0.200254	FALSE	bcn92
FBtr0070432;FBtr0345598;FBtr0343589;FBtr0301515;FBtr0070433;FBtr0112843	21.8798	21.8798	21.8798	21.8798	21.8798	21.8798	21.8798	21.8798	0.500905	0	0	FALSE	ph-p;ph-d
FBtr0070434	21.8798	21.8798	21.8798	21.8798	21.8798	21.8798	21.8798	21.8798	0.500905	0	0	FALSE	CG16903
FBtr0100380;FBtr0070435;FBtr0331161	21.8798	21.8798	21.8798	21.8798	21.8798	21.8798	21.8798	21.8798	0.500905	0	0	FALSE	z
FBtr0302449;FBtr0302448;FBtr0302447;FBtr0070437	23.8166	23.5489	23.4041	24.4874	26.9971	27.241	27.2748	26.9363	0.000846074	0.919101	-3.29804	TRUE	CG13759
FBtr0308566;FBtr0070438	27.5154	27.2629	27.3389	27.8916	27.2805	25.658	27.6031	27.8088	0.588926	0.295451	0.414621	FALSE	wds
FBtr0070441	24.8914	21.8798	21.8618	21.8798	22.2601	23.0937	25.9386	25.7927	0.500905	0.455661	-1.6431	FALSE	Zw10
FBtr0070442	23.5467	23.7573	25.6736	21.8798	21.8798	21.8798	21.8798	21.8798	0.339581	0.649416	1.83454	FALSE	Seipin
FBtr0307159;FBtr0070445	21.8798	21.8798	21.8798	21.8798	21.8798	21.8798	21.8798	21.8798	0.500905	0	0	FALSE	Tsp3A
FBtr0070446	30.4899	30.0668	30.4868	30.7619	29.6428	30.4168	30.0443	30.0941	0.481627	0.569164	0.401856	FALSE	CG8636
FBtr0340093;FBtr0070448	21.8798	23.8935	24.9101	21.8798	21.8798	21.8798	21.8798	21.8798	0.500905	0.526005	1.26099	FALSE	Klp3A
FBtr0303887;FBtr0303886;FBtr0070457;FBtr0334883	21.8798	21.8798	21.8798	21.8798	21.8798	21.8798	21.8798	21.8798	0.500905	0	0	FALSE	boi
FBtr0070459;FBtr0308831	28.7004	28.3174	28.6267	28.3836	28.6301	28.6697	28.2946	28.0311	0.716512	0.211605	0.100644	FALSE	tko
FBtr0070473;FBtr0070472;FBtr0070470;FBtr0070469;FBtr0070468;FBtr0070466;FBtr0070474;FBtr0070467;FBtr0070475;FBtr0301966;FBtr0070476;FBtr0302185	26.392	26.3557	26.6404	27.0653	23.2783	26.4149	26.679	26.8157	0.523908	0.338257	0.81641	FALSE	sgg
FBtr0070479	27.8545	28.3335	27.8369	27.9935	28.4452	27.8721	28.1571	27.6707	0.927212	0.0590377	-0.031664	FALSE	eIF2B-beta
FBtr0070480	21.8798	21.8798	21.8798	21.8798	21.8798	21.8798	21.8798	21.8798	0.500905	0	0	FALSE	CG2681
FBtr0070485	21.8798	21.8798	21.8798	21.8798	21.8798	21.8798	21.8798	21.8798	0.500905	0	0	FALSE	fs(1)Ya
FBtr0070490	23.6067	21.8798	23.2468	23.7437	21.8798	26.3023	26.752	26.7666	0.498595	0.559613	-2.30595	FALSE	w
FBtr0345318;FBtr0309881;FBtr0070493;FBtr0070492;FBtr0070491	24.3434	25.9027	26.0173	26.1118	26.3452	25.8457	26.3682	26.0452	0.500905	0.431652	-0.557301	FALSE	CG32795
FBtr0332496;FBtr0070494	21.8798	21.8798	21.8798	21.8798	21.8798	21.8798	21.8798	21.8798	0.500905	0	0	FALSE	Syx4
FBtr0347024;FBtr0070497	30.4323	30.313	30.2443	30.5173	30.3117	30.2266	30.324	30.1399	0.500905	0.532573	0.126166	FALSE	ttm50
FBtr0070498	21.8798	21.8798	21.8798	24.3056	21.8798	23.7582	21.8798	21.8798	0.915874	0.0679498	0.136842	FALSE	CG2701
FBtr0070499	22.798	21.8798	21.8798	23.8717	21.8798	21.8798	21.8798	21.8798	0.500905	0.496857	0.727541	FALSE	CG2685
FBtr0345710;FBtr0070501;FBtr0273276	21.8798	21.8798	21.8798	21.8798	21.8798	23.7388	23.2787	23.2752	0.244392	0.713415	-1.16335	FALSE	Csat
FBtr0345716;FBtr0070502	27.718	27.8574	27.9379	27.7111	27.6855	28.3839	28.2657	28.3652	0.405631	0.611716	-0.368984	FALSE	CG2658
FBtr0070504	33.5549	33.0762	33.5252	33.3159	32.5692	31.8137	32.5759	32.4665	0.0635659	0.830854	1.01171	FALSE	CG2650
FBtr0304659;FBtr0070507	21.8798	21.8798	21.8798	21.8798	21.8798	21.8798	21.8798	21.8798	0.500905	0	0	FALSE	N
FBtr0343600;FBtr0070508	29.9407	28.9789	29.4527	29.0756	28.1441	28.5435	28.2454	28.3485	0.0790629	0.819234	1.04164	FALSE	CG3939
FBtr0070515;FBtr0070513;FBtr0070511;FBtr0070512	21.8798	21.8798	21.8798	21.8798	24.2093	21.8798	23.6152	21.8798	0.500905	0.532532	-1.01623	FALSE	dnc
FBtr0070542	23.5146	23.44	21.8798	25.1422	24.735	24.2013	23.4583	23.5835	0.654726	0.252468	-0.50037	FALSE	Fcp3C
FBtr0345708;FBtr0070543	21.8798	22.3392	22.7354	21.8798	25.6655	26.8535	22.7506	23.9963	0.253604	0.705338	-2.60794	FALSE	CG18508
FBtr0070550	21.8798	21.8798	21.8798	21.8798	21.8798	21.8798	21.8798	21.8798	0.500905	0	0	FALSE	CG32793
FBtr0070552	21.8798	21.8798	21.8798	21.8798	21.8798	21.8798	21.8798	21.8798	0.500905	0	0	FALSE	CG3598
FBtr0070554	21.8798	21.8798	21.8798	21.8798	21.8798	21.8798	21.8798	21.8798	0.500905	0	0	FALSE	CG14421
FBtr0070555	21.8798	21.8798	21.8798	21.8798	21.8798	21.8798	21.8798	21.8798	0.500905	0	0	FALSE	CG14422
FBtr0070556	21.8798	21.8798	21.8798	21.8798	21.8798	21.8798	21.8798	21.8798	0.500905	0	0	FALSE	CG14423
FBtr0332493;FBtr0070558	29.7693	29.961	29.6024	29.8244	29.4955	29.2343	29.3752	28.9679	0.124307	0.788864	0.521035	FALSE	CG3603
FBtr0343758;FBtr0070562	21.8798	21.8798	21.8798	21.8798	21.8798	21.8798	21.8798	21.8798	0.500905	0	0	FALSE	rst
FBtr0070563	21.8798	21.8798	21.8798	21.8798	21.8798	21.8798	21.8798	21.8798	0.500905	0	0	FALSE	CG14424
FBtr0070564	23.0071	24.1153	23.5987	23.6914	21.8798	21.8798	21.8798	21.8798	0.0107147	0.889752	1.72335	FALSE	CG14419
FBtr0331609;FBtr0070568	28.181	28.6405	28.5172	28.2047	28.1642	28.6636	28.7967	28.3244	0.728504	0.203323	-0.101395	FALSE	CG10802
FBtr0331612;FBtr0331611;FBtr0331610;FBtr0332285;FBtr0070569	24.8699	21.8798	23.7152	21.8798	21.8798	21.8798	21.8798	21.8798	0.500905	0.520555	1.20639	FALSE	CG10803
FBtr0070582	24.5475	22.8812	23.4352	24.0734	23.678	24.6478	23.3474	23.2097	0.984873	0.0106413	0.0135936	FALSE	Rala
FBtr0070584;FBtr0070583	24.2647	22.9315	23.6805	24.6746	23.4255	26.4976	26.3578	24.4773	0.500905	0.501252	-1.30173	FALSE	Rala
FBtr0070586;FBtr0333793;FBtr0070587	21.8798	21.8798	23.2696	21.8798	21.8798	23.646	21.8798	21.8798	0.921388	0.06381	-0.094103	FALSE	CG2875
FBtr0070590	26.9587	27.4493	21.8798	27.4635	27.4777	27.2961	27.2149	26.0035	0.617871	0.276529	-1.06024	FALSE	CG14270
FBtr0333764;FBtr0070600;FBtr0070598;FBtr0070597	31.6849	31.9374	31.7452	31.7122	32.2685	32.0902	32.1165	31.8439	0.23812	0.720145	-0.309869	FALSE	HIP-R;HIP
FBtr0070606;FBtr0112801;FBtr0112802	21.8798	21.8798	21.8798	21.8798	21.8798	21.8798	21.8798	21.8798	0.500905	0	0	FALSE	ec
FBtr0340202;FBtr0070610;FBtr0070609;FBtr0340201	27.6204	27.9817	28.1374	27.8144	27.6826	27.2832	27.8557	27.948	0.500905	0.372668	0.196079	FALSE	CG2930
FBtr0070611	30.7444	31.0073	31.0609	30.3161	31.0818	30.9651	31.2169	30.8197	0.500905	0.427077	-0.238688	FALSE	VhaAC39-1
FBtr0070612	21.8798	21.8798	21.8798	21.8798	21.8798	21.8798	21.8798	21.8798	0.500905	0	0	FALSE	CG15239
FBtr0345711;FBtr0070613	21.8798	21.8798	21.8798	21.8798	21.8798	21.8798	21.8798	21.8798	0.500905	0	0	FALSE	CG2941
FBtr0070617;FBtr0342739;FBtr0070618;FBtr0070616	31.9545	32.5425	32.0889	31.8923	32.1861	32.261	32.3558	32.1098	0.649767	0.255896	-0.108645	FALSE	Vap-33A
FBtr0070624	29.992	30.008	29.6765	29.4131	29.2874	28.8998	27.9369	28.9902	0.224283	0.729922	0.993819	FALSE	CG6414
FBtr0070625	23.0473	21.8798	21.8348	22.8928	21.8798	21.8798	26.5205	23.5741	0.538109	0.328919	-1.04987	FALSE	CG6428
FBtr0342740;FBtr0070626	27.7856	28.0743	27.4331	27.5516	28.2079	27.6123	28.1007	27.9724	0.500905	0.455702	-0.262183	FALSE	lva
FBtr0070638	21.8798	21.8798	21.8798	21.8798	21.8798	21.8798	21.8798	21.8798	0.500905	0	0	FALSE	brn
FBtr0343425;FBtr0307206;FBtr0070641;FBtr0070639	32.9292	33.0833	32.4985	33.226	32.7035	32.445	32.1782	32.819	0.481891	0.5681	0.397824	FALSE	cib
FBtr0333184;FBtr0333183;FBtr0070642	21.8798	21.8798	21.8798	21.8798	21.8798	21.8798	21.8798	21.8798	0.500905	0	0	FALSE	dgt4
FBtr0345713;FBtr0305182;FBtr0305181;FBtr0300931;FBtr0070643;FBtr0305185;FBtr0305184;FBtr0305183;FBtr0305180;FBtr0305179;FBtr0301124	21.8798	21.8798	21.8798	21.8798	23.4162	21.8798	21.8798	23.6803	0.500905	0.53782	-0.83424	FALSE	tyf
FBtr0070644	26.6557	27.279	26.9183	26.3912	27.0483	26.4862	26.8881	27.0329	0.889779	0.087199	-0.0528274	FALSE	GlcAT-I
FBtr0070645	21.8798	21.8798	21.8798	21.8798	21.8798	21.8798	21.8798	21.8798	0.500905	0	0	FALSE	CG15570
FBtr0340200;FBtr0070648	27.9518	27.8871	28.1446	27.0956	28.118	27.68	27.5876	28.3452	0.722952	0.207141	-0.162911	FALSE	CG2982
FBtr0301475;FBtr0070651;FBtr0070650	24.3362	25.0944	22.0478	23.6925	23.7828	24.0401	21.8798	24.408	0.850126	0.116871	0.265086	FALSE	norpA
FBtr0070652	27.4593	27.5754	27.8394	27.5207	28.0274	28.2258	28.2551	28.1602	0.031082	0.862024	-0.568452	FALSE	CG3626
FBtr0070655	28.4393	27.1924	27.7549	27.4372	24.2553	28.0509	27.8601	28.398	0.720282	0.209151	0.564911	FALSE	mRpL33
FBtr0343574;FBtr0070656	21.8798	21.8798	21.8798	21.8798	21.8798	21.8798	21.8798	21.8798	0.500905	0	0	FALSE	mei-9
FBtr0070663	21.8798	21.8798	21.8798	21.8798	21.8798	21.8798	21.8798	21.8798	0.500905	0	0	FALSE	Femcoat
FBtr0336882;FBtr0336884;FBtr0070665;FBtr0343523;FBtr0343524;FBtr0070666;FBtr0070667	29.5137	29.8134	29.8069	29.9653	29.8111	29.3748	29.6896	29.845	0.667382	0.244558	0.0947236	FALSE	Fas2
FBtr0333185;FBtr0333186;FBtr0070668	21.8798	21.8798	21.8798	21.8798	21.8798	21.8798	21.8798	21.8798	0.500905	0	0	FALSE	Tip60
FBtr0070669	26.0967	27.1405	26.9857	26.5719	26.6287	25.7296	25.9956	27.1546	0.591217	0.29388	0.321577	FALSE	Nsun2
FBtr0070670	21.8798	21.8798	21.8798	21.8798	21.8798	21.8798	21.8798	21.8798	0.500905	0	0	FALSE	Xpac
FBtr0343297;FBtr0070671	21.8798	21.8798	21.8798	21.8798	21.8798	21.8798	21.8798	21.8798	0.500905	0	0	FALSE	CG6379
FBtr0308916;FBtr0070674	22.8363	21.8798	23.7619	24.2751	21.8798	23.4813	25.0996	24.1275	0.733773	0.199455	-0.458775	FALSE	CG3556
FBtr0343566;FBtr0070675	31.3443	31.277	31.3624	31.4729	31.4127	31.3532	31.6738	31.5641	0.500905	0.520802	-0.136813	FALSE	CHOp24
FBtr0070677	25.0038	25.4256	25.2825	25.2437	26.0606	23.8456	26.0437	25.7912	0.821832	0.137246	-0.196415	FALSE	CG15912
FBtr0070678	21.8798	25.9157	21.8798	21.8798	21.8798	21.8798	21.8798	21.8798	0.500905	0.353553	1.00899	FALSE	CG3527
FBtr0070679	21.8798	21.8798	21.8798	24.0446	22.8741	25.3858	21.8798	21.8798	0.705266	0.219224	-0.583889	FALSE	CG3546
FBtr0070681	21.8798	24.7549	21.8798	21.8798	21.8798	21.8798	21.8798	21.8798	0.500905	0.353553	0.718785	FALSE	pon
FBtr0070682	28.8353	28.7918	28.5927	29.0754	28.6634	28.5846	28.4703	28.0555	0.365264	0.635522	0.38031	FALSE	mRpL30
FBtr0070684;FBtr0070683	27.6589	28.0432	28.1503	27.6418	28.0627	26.354	28.1977	27.8979	0.727647	0.203916	0.24543	FALSE	Cbp80
FBtr0070687;FBtr0070686	21.8798	21.8798	21.8798	21.8798	21.8798	21.8798	21.8798	21.8798	0.500905	0	0	FALSE	rap
FBtr0345715;FBtr0070690	28.9688	29.2344	29.1506	28.6077	29.2114	29.502	28.6857	28.9992	0.756045	0.184697	-0.109207	FALSE	Torsin
FBtr0343567;FBtr0070698	24.0655	27.321	26.8474	26.7783	27.4306	23.5507	21.8798	27.2053	0.599849	0.288169	1.23647	FALSE	CG11444
FBtr0070699	21.8798	21.8798	21.8798	21.8798	21.8798	21.8798	21.8798	21.8798	0.500905	0	0	FALSE	CG11436
FBtr0343568;FBtr0332290;FBtr0070702	25.7116	26.9793	27.5049	26.6014	27.2835	26.8443	25.8599	27.8104	0.779688	0.167856	-0.250219	FALSE	rb
FBtr0307065;FBtr0070707;FBtr0070706;FBtr0070704	27.5584	29.6214	28.9123	29.1624	29.8797	28.6611	28.4954	28.8583	0.856911	0.112001	-0.159996	FALSE	ctp
FBtr0070709;FBtr0070708;FBtr0070711;FBtr0070710	33.8891	33.9539	33.9332	33.8429	33.863	33.8713	33.7949	33.8033	0.365797	0.635036	0.0716567	FALSE	l(1)G0334
FBtr0070712	21.8798	21.8798	21.8798	21.8798	26.6617	21.8798	21.8798	23.7583	0.500905	0.482399	-1.66511	FALSE	CG7024
FBtr0070721	21.8798	21.8798	21.8798	21.8798	21.8798	21.8798	21.8798	21.8798	0.500905	0	0	FALSE	CG6927
FBtr0343535;FBtr0070723	21.8798	21.8798	21.8798	21.8798	21.8798	21.8798	21.8798	21.8798	0.500905	0	0	FALSE	CG6903
FBtr0070725;FBtr0343528;FBtr0343529;FBtr0301796;FBtr0301794;FBtr0301793;FBtr0070724	24.0557	23.5683	21.8798	23.3991	21.8798	21.8798	21.8798	21.8798	0.246744	0.711011	1.34595	FALSE	Ptp4E
FBtr0070748	28.4561	28.2007	28.2904	28.9676	28.0121	28.5741	28.0787	28.4371	0.534303	0.331297	0.203181	FALSE	snf
FBtr0345745;FBtr0070749	21.8798	21.8798	21.8798	21.8798	21.8798	21.8798	21.8798	21.8798	0.500905	0	0	FALSE	dhd
FBtr0070751	21.8798	21.8798	21.8798	21.8798	21.8798	21.8798	21.8798	23.1722	0.500905	0.353553	-0.323117	FALSE	Sas10
FBtr0340477;FBtr0112876;FBtr0070753;FBtr0070752	26.3393	27.2574	27.0822	26.9447	27.3971	27.5402	27.5721	27.9165	0.222041	0.731697	-0.700576	FALSE	Rnp4F
FBtr0340478;FBtr0070755	21.8798	21.8798	21.8798	21.8798	28.9411	28.4432	28.7758	28.8171	3.35799e-07	0.934742	-6.86453	TRUE	TrxT
FBtr0070756	21.8798	23.7903	21.8798	21.8798	21.8798	23.5952	23.0217	21.8798	0.819183	0.139266	-0.236701	FALSE	Cdk7
FBtr0340476;FBtr0070762	25.6289	26.9507	24.6729	22.639	25.9885	21.8798	24.7325	26.1313	0.895989	0.0822938	0.28985	FALSE	Mcm3
FBtr0070763	22.3888	21.8798	23.8226	21.8798	25.6179	24.4026	23.6761	23.1262	0.324071	0.657493	-1.71296	FALSE	XRCC1
FBtr0308348;FBtr0070764	23.4868	21.8798	24.1885	24.2649	21.8798	22.3769	23.2469	21.8798	0.500905	0.539972	1.10917	FALSE	CanB
FBtr0340462;FBtr0340461;FBtr0070775;FBtr0070773;FBtr0070772	25.89	25.8496	25.5469	25.8993	25.5815	24.4698	25.5609	25.8344	0.500905	0.459158	0.434844	FALSE	CG4165
FBtr0070776	21.8798	21.8798	24.295	23.7296	21.8798	21.8798	21.8798	21.8798	0.500905	0.533843	1.06625	FALSE	CG16756
FBtr0340460;FBtr0070777	24.5257	25.9674	27.3027	23.3712	24.8846	23.7272	25.2284	25.5499	0.76763	0.176657	0.444213	FALSE	CG15784
FBtr0345786;FBtr0070779	22.5875	21.8798	25.2589	23.4695	28.6791	21.8798	21.8798	24.1125	0.765051	0.178573	-0.838883	FALSE	CG4151
FBtr0070782	21.8798	21.8798	21.8798	21.8798	21.8798	21.8798	21.8798	21.8798	0.500905	0	0	FALSE	l(1)G0045
FBtr0070784;FBtr0070785	21.8798	21.8798	21.8798	21.8798	21.8798	24.6542	21.8798	21.8798	0.500905	0.353553	-0.693599	FALSE	RhoGAP5A
FBtr0345787;FBtr0070791	21.8798	21.8798	21.8798	21.8798	26.5782	21.8798	21.8798	21.8798	0.500905	0.353553	-1.1746	FALSE	CG32762
FBtr0308689;FBtr0308688;FBtr0070794;FBtr0070795	26.937	27.8988	26.8335	27.0364	23.5599	27.4746	27.7987	27.5469	0.722451	0.207547	0.581403	FALSE	spoon
FBtr0070797	21.8798	21.8798	21.8798	21.8798	21.8798	21.8798	21.8798	21.8798	0.500905	0	0	FALSE	NAAT1
FBtr0344827;FBtr0070798	21.8798	21.8798	21.8798	21.8798	21.8798	21.8798	21.8798	21.8798	0.500905	0	0	FALSE	CG3309
FBtr0340463;FBtr0070799	26.7222	27.6391	25.2306	24.3602	25.8381	27.7155	27.2765	27.0716	0.500905	0.405439	-0.98743	FALSE	CG4119
FBtr0345788;FBtr0070801;FBtr0070800	32.2154	31.813	32.3638	32.0922	32.057	32.3624	32.3759	32.4578	0.500905	0.442396	-0.192215	FALSE	RpL35
FBtr0340465;FBtr0340464;FBtr0070804	24.227	21.8798	21.8798	21.8798	21.8798	21.8798	21.8798	21.8798	0.500905	0.353553	0.586818	FALSE	cv
FBtr0332398;FBtr0070807	21.8798	21.8798	21.8798	23.1343	21.8798	21.8798	21.8798	21.8798	0.500905	0.353553	0.313632	FALSE	CG4078
FBtr0339743;FBtr0070808	26.4028	23.5318	26.4558	22.5167	25.8849	24.201	24.9791	26.1327	0.740495	0.194865	-0.572651	FALSE	CG15772
FBtr0070815	21.8798	21.8798	21.8798	21.8798	21.8798	21.8798	21.8798	21.8798	0.500905	0	0	FALSE	Cpr5C
FBtr0345313;FBtr0339948;FBtr0070821	28.5089	28.5341	28.4803	28.9345	28.4922	28.0735	28.8241	28.7916	0.834727	0.127807	0.0690857	FALSE	CG16721
FBtr0345894;FBtr0100663;FBtr0100662;FBtr0070823;FBtr0070822	28.7107	30.5323	29.0008	28.2724	29.1858	29.5208	23.6365	29.3919	0.60222	0.286649	1.19532	FALSE	Act5C
FBtr0333800;FBtr0070824	27.2332	27.8102	27.7985	27.2971	27.4599	26.9606	27.6719	27.6903	0.811195	0.145604	0.0890996	FALSE	CG4020
FBtr0345317;FBtr0290235;FBtr0070827	34.3625	33.9765	34.2533	34.1421	33.75	33.9801	33.787	33.7196	0.136473	0.780148	0.374448	FALSE	CG3011
FBtr0343537;FBtr0070828	26.4942	25.6413	23.4462	26.0435	25.7907	25.7901	26.5072	25.9465	0.563862	0.311119	-0.602369	FALSE	CG3016
FBtr0070829	21.8798	21.8798	21.8798	21.8798	21.8798	21.8798	21.8798	21.8798	0.500905	0	0	FALSE	mof
FBtr0070830	24.047	27.5004	26.1316	21.8798	26.8846	26.2438	26.3831	26.7153	0.500905	0.450653	-1.66703	FALSE	GAA1
FBtr0070832	21.8798	24.6553	23.4293	25.1272	23.8982	21.8798	21.8798	21.8798	0.500905	0.505076	1.38854	FALSE	CG15766
FBtr0070833	29.2683	29.0586	29.122	29.111	29.5129	29.9896	29.187	29.2427	0.500905	0.557532	-0.343042	FALSE	CG3108
FBtr0070836	26.1598	26.6958	26.8373	25.9342	27.0881	26.5786	26.9688	26.9028	0.446984	0.588853	-0.477805	FALSE	CG3097
FBtr0308577;FBtr0302940;FBtr0070839;FBtr0070837	27.5785	27.803	27.8291	27.7419	28.0266	27.919	28.3843	28.0911	0.202455	0.743676	-0.367145	FALSE	MAPk-Ak2
FBtr0339744;FBtr0070840	21.8798	21.8798	21.8798	21.8798	21.8798	21.8798	21.8798	21.8798	0.500905	0	0	FALSE	lin-52
FBtr0332401;FBtr0332400;FBtr0332399;FBtr0070842;FBtr0070841	21.8798	21.8798	21.8798	21.8798	21.8798	21.8798	24.0907	21.8798	0.500905	0.353553	-0.552727	FALSE	IntS6
FBtr0070843;FBtr0340670;FBtr0339525	25.4149	26.239	25.5225	23.9871	26.2361	23.7577	24.1413	25.9789	0.836923	0.126161	0.262383	FALSE	CG32758
FBtr0342972;FBtr0070845;FBtr0342971;FBtr0070844	21.8798	21.8798	21.8798	21.8798	21.8798	21.8798	21.8798	21.8798	0.500905	0	0	FALSE	CG33080
FBtr0070847	24.2548	23.912	23.2947	22.6136	24.7894	22.2927	23.2057	22.9395	0.838258	0.125033	0.211925	FALSE	CG3160
FBtr0308339;FBtr0070848;FBtr0340222	21.8798	21.8798	21.8798	21.8798	24.3148	21.8798	22.7228	25.3506	0.391732	0.619202	-1.68721	FALSE	Tre1
FBtr0070849	28.2879	28.1909	27.9672	28.2571	28.0525	28.046	28.154	27.7792	0.500905	0.501008	0.16782	FALSE	Rab18
FBtr0070852;FBtr0070851;FBtr0070850	25.9537	25.9334	24.6105	22.7886	23.4155	23.1622	22.4515	23.5947	0.406812	0.611108	1.66557	FALSE	Sirt4
FBtr0070864	23.4663	23.5264	23.3853	24.0743	23.4667	23.8352	23.3827	24.1285	0.810805	0.146079	-0.0901786	FALSE	CG6067
FBtr0070866;FBtr0343294	21.8798	21.8798	21.8798	21.8798	21.8798	21.8798	21.8798	23.3349	0.500905	0.353553	-0.363774	FALSE	CG5966
FBtr0305344;FBtr0070867	29.8588	29.7121	29.8821	29.2736	29.7603	30.0861	29.5174	29.6354	0.820908	0.137781	-0.0681897	FALSE	CG5941
FBtr0070871;FBtr0308190	22.9609	23.4262	21.8798	21.8798	21.8798	25.5931	21.8798	21.8798	0.869278	0.102295	-0.271457	FALSE	CG5928
FBtr0343930;FBtr0340032;FBtr0070873;FBtr0070872	25.1344	21.8798	21.8798	21.8798	23.353	21.8798	21.8798	22.1873	0.794669	0.156606	0.368478	FALSE	Nep1
FBtr0345294;FBtr0339504;FBtr0339503;FBtr0339502;FBtr0070877	30.8651	30.7885	30.494	30.4683	30.6719	30.5352	29.9947	30.0774	0.500905	0.535773	0.334209	FALSE	sqh
FBtr0070878	21.8798	21.8798	21.8798	21.8798	21.8798	21.8798	21.8798	21.8798	0.500905	0	0	FALSE	Btd
FBtr0070879	21.8798	21.8798	21.8798	21.8798	21.8798	21.8798	21.8798	21.8798	0.500905	0	0	FALSE	vanin-like
FBtr0070881	23.2677	23.4972	25.3038	22.825	21.8798	21.8798	21.8798	21.8798	0.176707	0.757674	1.84364	FALSE	CG32750
FBtr0070884	25.8153	25.9394	26.126	26.333	25.5001	25.7449	23.805	24.505	0.306068	0.669592	1.1647	FALSE	Mipp2
FBtr0345900;FBtr0070887	27.6722	28.3558	27.7826	27.8063	28.3679	28.1861	28.5628	28.4475	0.252097	0.706328	-0.486832	FALSE	CG4666
FBtr0114466;FBtr0070888;FBtr0331169	26.683	26.7294	26.4671	26.9601	27.0633	26.8544	24.0044	26.9257	0.664524	0.246542	0.497942	FALSE	Tsp5D
FBtr0070890	21.8798	21.8798	21.8798	21.8798	21.8798	21.8798	22.3839	21.8798	0.500905	0.353553	-0.126027	FALSE	mab-21
FBtr0070892	21.8798	23.2214	21.8798	21.8798	23.5769	21.8798	21.8798	21.8798	0.92248	0.0626165	-0.0888801	FALSE	fs(1)M3
FBtr0070893;FBtr0339496;FBtr0112954;FBtr0339495	26.9036	27.8667	27.2848	27.8288	27.95	28.124	28.2266	27.9129	0.329346	0.654637	-0.582386	FALSE	CG14445
FBtr0070894	21.8798	21.8798	21.8798	21.8798	21.8798	21.8798	21.8798	21.8798	0.500905	0	0	FALSE	Spx
FBtr0070895	21.8798	23.7339	21.8798	23.0364	21.8798	23.5111	23.1438	24.9508	0.525128	0.337413	-0.738892	FALSE	CG3781
FBtr0340027;FBtr0070896	25.2373	26.2493	26.5393	25.6246	25.7632	25.822	25.8737	26.7535	0.81735	0.140714	-0.140505	FALSE	Spt6
FBtr0070897	29.0124	29.0885	29.0255	29.2344	29.3855	29.3474	29.3652	29.486	0.0479626	0.844266	-0.305819	FALSE	wuho
FBtr0305494;FBtr0070898	23.5486	23.5683	23.9875	24.4081	26.5364	23.8004	26.5886	22.8928	0.500905	0.386572	-1.07648	FALSE	CG15896
FBtr0070899	21.8798	21.8798	21.8798	21.8798	23.7178	24.9284	21.8798	23.7111	0.276759	0.689444	-1.67951	FALSE	CG3815
FBtr0070900	21.8798	21.8798	24.417	21.8798	21.8798	21.8798	21.8798	21.8798	0.500905	0.353553	0.63431	FALSE	CG3823
FBtr0331395;FBtr0331394;FBtr0070904;FBtr0070903	29.6038	29.3053	29.1028	29.4231	28.9949	29.4027	29.5951	29.3751	0.952153	0.0392006	0.0168276	FALSE	CG3842
FBtr0070905	25.9473	23.004	25.2932	24.8263	26.3886	26.515	25.8674	25.9056	0.396911	0.616673	-1.40143	FALSE	CG3847
FBtr0070907;FBtr0070906	36.4621	36.3857	36.3132	36.2555	36.2247	36.2146	36.1545	36.1228	0.170365	0.761524	0.174983	FALSE	kdn
FBtr0070910;FBtr0070909;FBtr0343373	28.5476	28.4038	28.7204	27.848	28.7611	28.3485	28.6284	29.1465	0.500905	0.453554	-0.341201	FALSE	Marf
FBtr0070913	30.9816	31.4477	31.3319	31.0289	30.8363	30.8039	31.0443	30.9519	0.361859	0.63725	0.288465	FALSE	Spat
FBtr0070914	21.8798	21.8798	21.8798	21.8798	21.8798	21.8798	21.8798	21.8798	0.500905	0	0	FALSE	dx
FBtr0345293;FBtr0343329;FBtr0343328;FBtr0070916;FBtr0070915	34.0451	34.506	33.9539	34.2905	34.3895	33.8748	34.0507	33.9966	0.633848	0.266345	0.121027	FALSE	RpL7A
FBtr0070918	21.8798	21.8798	21.8798	21.8798	21.8798	21.8798	21.8798	21.8798	0.500905	0	0	FALSE	CG3342
FBtr0331432;FBtr0331431;FBtr0331430;FBtr0070921	27.5582	27.8089	27.2896	27.7859	27.6701	27.7144	27.1543	27.7139	0.873215	0.0987145	0.0474595	FALSE	PpV
FBtr0070922	21.8798	21.8798	21.8798	21.8798	21.8798	21.8798	21.8798	21.8798	0.500905	0	0	FALSE	swa
FBtr0347282;FBtr0340026;FBtr0070924	32.5102	32.4284	32.6105	32.6811	32.4263	32.6644	32.7982	32.6347	0.610002	0.281612	-0.0733567	FALSE	CG3446
FBtr0070926	21.8798	21.8798	21.8798	21.8798	21.8798	21.8798	21.8798	21.8798	0.500905	0	0	FALSE	CG15892
FBtr0340028;FBtr0070930	21.8798	26.044	25.2796	23.2771	24.3422	24.174	26.5936	22.5879	0.883224	0.0920983	-0.30433	FALSE	Top3beta
FBtr0070938;FBtr0070937	27.0746	26.4383	26.8195	26.4973	26.2167	26.3525	27.4802	26.6846	0.965879	0.0285538	0.0239126	FALSE	schlank
FBtr0070946;FBtr0070947	21.8798	21.8798	21.8798	21.8798	21.8798	21.8798	21.8798	21.8798	0.500905	0	0	FALSE	APC7
FBtr0070952	21.8798	25.0998	24.1408	21.8798	21.8798	21.8798	21.8798	24.4898	0.654554	0.252779	0.717771	FALSE	Mcm6
FBtr0070954;FBtr0070953	34.6314	34.0972	34.3523	34.8321	33.8761	34.0516	33.9418	33.9207	0.201816	0.744265	0.53067	FALSE	l(1)G0255
FBtr0070955	21.8798	21.8798	21.8798	21.8798	28.2642	28.672	28.7927	28.4426	4.96319e-07	0.934537	-6.6631	TRUE	CG4095
FBtr0345295;FBtr0100420;FBtr0100419;FBtr0100416;FBtr0100415;FBtr0100414;FBtr0100413;FBtr0070957;FBtr0070956	21.8798	21.8798	21.8798	21.8798	21.8798	21.8798	21.8798	21.8798	0.500905	0	0	FALSE	Pink1
FBtr0302357;FBtr0302356;FBtr0070960	23.3592	22.0033	23.006	22.578	23.6531	23.8794	23.8632	24.7054	0.168538	0.762908	-1.28861	FALSE	CG14439
FBtr0339464;FBtr0070962;FBtr0070961	23.5868	24.1769	23.1414	26.8847	22.7087	23.6189	24.7093	22.953	0.501358	0.35309	0.949942	FALSE	CG14438
FBtr0070963	27.3586	26.9837	26.9266	27.8223	26.5437	26.4621	26.5049	26.3261	0.12492	0.788425	0.813602	FALSE	COQ7
FBtr0070970	21.8798	21.8798	21.8798	21.8798	21.8798	21.8798	21.8798	21.8798	0.500905	0	0	FALSE	xit
FBtr0343321;FBtr0070972	21.8798	23.586	21.8798	21.8798	21.8798	21.8798	21.8798	21.8798	0.500905	0.353553	0.426547	FALSE	nonC
FBtr0340089;FBtr0340090;FBtr0070978;FBtr0340088	21.8798	21.8798	21.8798	21.8798	21.8798	21.8798	21.8798	21.8798	0.500905	0	0	FALSE	shf
FBtr0345292;FBtr0070983;FBtr0070982;FBtr0070981;FBtr0070980	33.4242	33.0019	33.4852	33.5454	33.1228	32.9143	33.2865	33.3731	0.500905	0.4094	0.189987	FALSE	RpL17
FBtr0340268;FBtr0340267;FBtr0340266;FBtr0340265;FBtr0070986;FBtr0070985;FBtr0070984	23.6805	22.673	22.0334	23.3254	22.5323	22.7968	25.5638	25.2283	0.500905	0.428649	-1.10224	FALSE	CG3168
FBtr0300772;FBtr0339493;FBtr0339491;FBtr0070988	21.8798	21.8798	21.8798	21.8798	21.8798	21.8798	21.8798	21.8798	0.500905	0	0	FALSE	CG14442
FBtr0070989	21.8798	21.8798	21.8798	21.8798	21.8798	21.8798	21.8798	21.8798	0.500905	0	0	FALSE	CG3184
FBtr0343330;FBtr0100409;FBtr0070990	32.1192	32.2178	32.2456	32.4758	32.166	32.1673	32.1466	32.1506	0.500905	0.467698	0.106956	FALSE	CG3192
FBtr0070991	26.177	25.5835	25.6213	26.0921	25.1347	22.161	23.2612	25.5542	0.365782	0.635278	1.84067	FALSE	CG3198
FBtr0070992	21.8798	21.8798	21.8798	21.8798	21.8798	25.0829	21.8798	23.8166	0.500905	0.51945	-1.28499	FALSE	CG3224
FBtr0070993	29.8436	29.492	29.6273	29.5602	29.3262	29.4564	29.6875	29.4468	0.500905	0.467544	0.151538	FALSE	CG3226
FBtr0071003	30.0235	30.3223	30.3555	29.6098	30.4133	29.8178	30.304	30.189	0.764144	0.179143	-0.103242	FALSE	CG4586
FBtr0071004	27.4804	27.1116	27.017	24.2332	27.0884	23.4321	23.0812	23.3304	0.494939	0.560957	2.22752	FALSE	bou
FBtr0332314;FBtr0301860;FBtr0071006;FBtr0071005	29.4923	29.8132	29.8154	30.4966	29.817	29.9499	30.6473	30.7822	0.500905	0.418436	-0.394727	FALSE	Inx2
FBtr0071008;FBtr0071007	21.8798	24.3121	21.8798	21.8798	21.8798	21.8798	21.8798	21.8798	0.500905	0.353553	0.608079	FALSE	CG32736
FBtr0343331;FBtr0071009	28.9606	28.1941	28.7272	28.7006	27.54	28.2435	27.9213	27.8414	0.161626	0.766567	0.759066	FALSE	CG4593
FBtr0071015	26.932	27.3552	26.4717	27.0265	27.3575	26.9595	26.7107	27.0455	0.844763	0.120521	-0.0719303	FALSE	CG8300
FBtr0332315;FBtr0071033	26.1714	26.7756	26.1737	25.691	26.7045	26.6232	27.0226	26.9996	0.291313	0.6806	-0.634584	FALSE	cm
FBtr0071035;FBtr0071034	24.2575	21.8798	24.5763	21.8798	24.297	21.8798	21.8798	23.9786	0.934132	0.0540247	0.139548	FALSE	Inx7
FBtr0334881;FBtr0309875;FBtr0309874;FBtr0309873;FBtr0071037;FBtr0071036	28.0467	28.203	28.3131	27.8541	28.2832	27.7928	28.8252	28.3667	0.542188	0.325796	-0.212775	FALSE	ogre
FBtr0071038	28.6394	28.2666	28.4518	28.2331	28.6307	28.511	28.46	27.857	0.921171	0.0639721	0.0330388	FALSE	CG3040
FBtr0071039	28.1808	28.2683	27.5272	27.7265	28.0425	27.237	27.5063	27.4831	0.500905	0.478174	0.358515	FALSE	CG32732
FBtr0343322;FBtr0071040;FBtr0345899	28.8051	28.6992	28.5303	28.6549	28.3061	28.2647	28.0743	28.1455	0.025614	0.867784	0.474737	FALSE	CG14434
FBtr0071041	21.8798	21.8798	21.8798	21.8798	21.8798	21.8798	21.8798	21.8798	0.500905	0	0	FALSE	Cht11
FBtr0343323;FBtr0071042	21.8798	21.8798	21.8798	21.8798	21.8798	21.8798	21.8798	21.8798	0.500905	0	0	FALSE	CG14435
FBtr0303414;FBtr0071047	28.2172	27.8598	28.2882	28.4017	27.141	28.2143	28.4253	28.0739	0.625208	0.271691	0.228062	FALSE	CG2059
FBtr0071051	21.8798	21.8798	21.8798	21.8798	21.8798	23.8895	24.5285	24.9007	0.248851	0.709619	-1.91984	FALSE	CG18155
FBtr0071053;FBtr0071052;FBtr0329894	26.6375	27.0538	26.238	25.9237	28.1512	26.4078	26.4841	26.1225	0.684003	0.232875	-0.328127	FALSE	CBP
FBtr0071055	22.9622	21.8798	24.6461	24.5188	21.8798	22.9116	22.4946	24.0321	0.576561	0.302592	0.672219	FALSE	CheA7a
FBtr0339816;FBtr0071064	21.8798	21.8798	21.8798	21.8798	25.2335	21.8798	25.4323	25.7284	0.23721	0.722711	-2.68873	FALSE	CG15034
FBtr0071065	24.4678	22.7421	24.396	21.8603	26.0641	23.4132	25.8093	25.6665	0.407642	0.610293	-1.8717	FALSE	Atg5
FBtr0346619;FBtr0071066	21.8798	21.8798	21.8798	21.8798	21.8798	21.8798	21.8798	21.8798	0.500905	0	0	FALSE	unc-119
FBtr0305134;FBtr0331733;FBtr0071068;FBtr0114613	24.9981	21.8798	21.8798	23.723	21.8798	21.8798	24.7929	24.5007	0.939843	0.0493738	-0.143134	FALSE	ct
FBtr0071070	21.8798	21.8798	21.8798	21.8798	21.8798	21.8798	21.8798	21.8798	0.500905	0	0	FALSE	Hira
FBtr0307272;FBtr0071072	28.7378	28.511	28.6994	28.7458	28.533	28.7585	29.3319	28.7522	0.524354	0.337914	-0.170389	FALSE	Rab39
FBtr0333748;FBtr0071074;FBtr0071073	30.6946	30.8948	30.948	31.2001	31.0032	30.9184	30.7816	30.9366	0.896537	0.0816154	0.0244447	FALSE	Tom40
FBtr0307273;FBtr0071076	28.1682	28.3971	28.3728	28.3736	28.0589	27.9475	28.0934	28.4737	0.500905	0.479106	0.184527	FALSE	Pdp
FBtr0071077	22.8305	26.6094	24.4701	22.4733	25.1864	23.5987	26.7197	24.0187	0.664936	0.246257	-0.785077	FALSE	NELF-B
FBtr0310287;FBtr0333203;FBtr0112946;FBtr0071079	21.8798	21.8798	21.8798	21.8798	21.8798	21.8798	21.8798	21.8798	0.500905	0	0	FALSE	CHES-1-like
FBtr0340162;FBtr0071089	27.079	22.9276	27.013	26.7273	27.2346	27.0045	27.2397	27.1369	0.500905	0.413804	-1.21724	FALSE	p115
FBtr0071090	25.8695	26.6262	27.0019	26.4736	25.8959	26.5602	25.7816	26.3775	0.500905	0.390888	0.338952	FALSE	bys
FBtr0071091	29.9432	30.5025	30.3736	30.1245	30.6364	30.4052	30.5686	30.4597	0.417068	0.604732	-0.281558	FALSE	CG1444
FBtr0340148;FBtr0071092	21.8798	21.8798	21.8798	21.8798	21.8798	21.8798	21.8798	21.8798	0.500905	0	0	FALSE	snz
FBtr0071093	28.3303	29.292	28.7964	28.649	29.1883	29.4112	29.1415	28.6933	0.500905	0.455112	-0.341616	FALSE	Ykt6
FBtr0345291;FBtr0071096;FBtr0071095;FBtr0071094	33.506	33.5586	33.3968	33.8167	33.7032	33.7404	33.6974	33.3127	0.839865	0.1236	-0.0438841	FALSE	RpS14b;RpS14a
FBtr0301679;FBtr0301677;FBtr0071102;FBtr0071101	29.9187	30.1364	29.1504	29.3085	29.796	29.8013	29.5836	29.4677	0.9374	0.0512105	-0.0336741	FALSE	sn
FBtr0340137;FBtr0340136;FBtr0071105;FBtr0340135	30.9255	30.9186	30.6434	30.7226	30.8465	30.6034	30.6295	30.861	0.656975	0.251103	0.0674252	FALSE	mys
FBtr0340139;FBtr0340138;FBtr0071108;FBtr0071107	29.1465	28.3675	28.7952	28.9647	28.2446	27.2891	28.8846	28.9335	0.500905	0.397527	0.480516	FALSE	Gclc
FBtr0340140;FBtr0071111;FBtr0071110;FBtr0071109	22.4085	26.9819	27.9951	27.9841	27.5251	27.4322	28.4705	27.9997	0.500905	0.388567	-1.5145	FALSE	CG2258
FBtr0071114;FBtr0071113;FBtr0071112	29.6476	29.5094	29.059	29.6342	29.3623	29.1295	29.3236	29.112	0.500905	0.491623	0.230724	FALSE	UbcE2H
FBtr0071116	30.29	30.4805	30.7828	30.1121	30.8733	30.4839	30.9524	30.9177	0.391027	0.619993	-0.390468	FALSE	CG2254
FBtr0071117	25.6324	21.3901	26.0058	25.5182	22.9279	26.472	26.7919	26.896	0.603872	0.285656	-1.13533	FALSE	Upf2
FBtr0071119;FBtr0333307;FBtr0333308;FBtr0301309;FBtr0071122;FBtr0071121;FBtr0071120;FBtr0071118;FBtr0333309	23.3354	25.4071	22.9165	26.3069	26.2361	25.4277	26.4274	26.5965	0.453934	0.585762	-1.68046	FALSE	fs(1)h
FBtr0071123	31.1301	31.2836	31.3259	30.6767	31.1229	31.2275	30.7712	30.7291	0.633137	0.266719	0.141398	FALSE	CG2233
FBtr0071125;FBtr0301675	23.9625	24.378	25.396	24.1247	25.7374	24.0456	23.6551	25.4228	0.795143	0.156118	-0.249939	FALSE	sws
FBtr0071129	21.8798	21.8798	21.8798	21.8798	21.8798	21.8798	21.8798	21.8798	0.500905	0	0	FALSE	l(1)G0193
FBtr0071130	21.8798	21.8798	21.8798	21.8798	21.8798	24.6905	21.8798	21.8798	0.500905	0.353553	-0.702692	FALSE	l(1)G0193
FBtr0331433;FBtr0071131	21.8798	23.6992	21.8798	21.8798	21.8798	21.8798	21.8798	21.8798	0.500905	0.353553	0.454847	FALSE	CG10778
FBtr0344137;FBtr0071132	29.709	29.7906	29.83	29.6398	30.2481	30.1867	30.4055	30.1161	0.0184549	0.877494	-0.496719	FALSE	CG10777
FBtr0071135;FBtr0071136	33.0549	33.2504	33.393	33.2116	33.3339	33.005	33.2213	33.2301	0.851201	0.115665	0.029915	FALSE	RpS6
FBtr0340163;FBtr0300900;FBtr0300899;FBtr0071141;FBtr0071140	30.5586	30.4818	30.8811	31.0985	30.2199	30.7285	30.3954	30.5604	0.500905	0.499596	0.278999	FALSE	CG18624
FBtr0345982;FBtr0071143	31.3396	31.5119	31.7353	31.5517	31.5514	31.5764	31.5202	31.6274	0.801411	0.1529	-0.0342141	FALSE	CG10932
FBtr0071146;FBtr0309795;FBtr0071145;FBtr0071147;FBtr0309796;FBtr0310269	21.8798	21.8798	21.8798	21.8798	21.8798	21.8798	21.8798	21.8798	0.500905	0	0	FALSE	dec-1
FBtr0071150	21.8798	21.8798	21.8798	21.8798	24.4901	21.8798	24.284	24.9491	0.2394	0.718478	-2.021	FALSE	CG10920
FBtr0339695;FBtr0071151	25.5513	25.1837	25.0644	23.7982	25.4454	22.1044	24.4714	25.2268	0.654554	0.252703	0.587424	FALSE	CG1575
FBtr0071166	25.2594	23.8971	25.1052	26.0118	22.3988	24.0505	21.8798	21.8798	0.134944	0.781637	2.51616	FALSE	CG2147
FBtr0071167;FBtr0071169;FBtr0071168	33.0468	33.1009	33.0518	33.2717	33.1515	33.0938	33.2749	33.1416	0.632774	0.266933	-0.047662	FALSE	Trxr-1
FBtr0307282;FBtr0071170	21.8798	21.8798	21.8798	21.8798	21.8798	21.8798	21.8798	21.8798	0.500905	0	0	FALSE	CG1632
FBtr0343353;FBtr0071174	21.8798	21.8798	21.8798	21.8798	21.8798	21.8798	21.8798	21.8798	0.500905	0	0	FALSE	CG10555
FBtr0071175	25.187	26.3553	24.4458	26.6007	25.383	24.8523	26.3876	26.4291	0.913588	0.0692115	-0.115815	FALSE	CG11190
FBtr0071178	28.3667	27.7512	28.3168	28.401	28.2682	28.2515	28.2148	28.1515	0.963163	0.0306903	-0.0125207	FALSE	CG15343
FBtr0071181;FBtr0071180	34.0742	34.1596	34.1049	34.1119	34.0991	33.8745	34.0659	34.0636	0.500905	0.513297	0.0868716	FALSE	ND75
FBtr0344985;FBtr0071183	28.9737	28.6027	28.9225	29.1831	28.5424	28.0706	28.0836	28.0667	0.0847757	0.815059	0.729705	FALSE	sni
FBtr0303844;FBtr0303843;FBtr0071184;FBtr0303842	21.8798	21.8798	21.8798	21.8798	24.2918	21.8798	23.7831	21.8798	0.500905	0.535128	-1.07883	FALSE	slpr
FBtr0071189	25.5326	25.7164	25.9324	25.7795	25.8893	25.6593	25.9096	25.7923	0.638313	0.263817	-0.0724053	FALSE	Gbeta5
FBtr0071190	30.5969	30.6296	30.6176	30.6298	30.814	30.8136	30.6416	30.5297	0.500905	0.399976	-0.0812575	FALSE	CG2263
FBtr0345988;FBtr0071191	21.8798	21.8798	21.8798	21.8798	21.8798	21.8798	21.8798	21.8798	0.500905	0	0	FALSE	CG17982
FBtr0340159;FBtr0071192	22.7654	21.8798	23.7952	21.8798	23.348	24.7176	24.3808	23.2805	0.349475	0.643141	-1.35168	FALSE	Smox
FBtr0071194	21.8798	25.5019	21.8798	21.8798	21.8798	21.8798	21.8798	21.8798	0.500905	0.353553	0.905525	FALSE	CG2260
FBtr0071197;FBtr0112962;FBtr0339438;FBtr0112961	32.0666	32.0201	31.867	32.1386	32.0046	32.3243	32.3968	32.11	0.500905	0.537927	-0.185823	FALSE	CG1440
FBtr0071198	21.8798	21.8798	21.8798	21.8798	21.8798	21.8798	21.8798	21.8798	0.500905	0	0	FALSE	Es2
FBtr0071201	21.8798	21.8798	21.8798	21.8798	21.8798	21.8798	21.8798	21.8798	0.500905	0	0	FALSE	Cp7Fb
FBtr0071202	21.8798	21.8798	21.8798	21.8798	21.8798	21.8798	21.8798	21.8798	0.500905	0	0	FALSE	Cp7Fc
FBtr0071203	21.8798	24.3177	21.8798	21.8798	23.2988	21.8798	21.8798	21.8798	0.822622	0.136458	0.254714	FALSE	Cp36
FBtr0300448;FBtr0071204	21.8798	22.7533	21.8798	21.8798	21.8798	21.8798	21.8798	21.8798	0.500905	0.353553	0.218378	FALSE	Cp38
FBtr0333522;FBtr0301764;FBtr0301762;FBtr0071209;FBtr0071207;FBtr0333523;FBtr0301763;FBtr0071208;FBtr0305914	32.6548	32.89	32.7263	32.6519	32.8854	32.4947	32.5983	32.8209	0.860621	0.109009	0.0309176	FALSE	Nrg
FBtr0112964;FBtr0112963;FBtr0331725;FBtr0331724;FBtr0331723;FBtr0071213;FBtr0071212	21.8798	21.8798	21.8798	21.8798	21.8798	21.8798	21.8798	21.8798	0.500905	0	0	FALSE	Trf4-1
FBtr0071215;FBtr0071214	21.8798	21.8798	21.8798	21.8798	21.8798	21.8798	24.6144	21.8798	0.500905	0.353553	-0.683667	FALSE	CG12065
FBtr0332626;FBtr0071218	21.8798	21.8798	21.8798	21.8798	21.8798	21.8798	21.8798	21.8798	0.500905	0	0	FALSE	CG12081
FBtr0343356;FBtr0071219;FBtr0071220	27.0853	27.7194	28.1285	27.4846	27.7249	27.2153	27.3217	27.9035	0.888553	0.0879942	0.0630723	FALSE	Crag
FBtr0345984;FBtr0331731;FBtr0331730;FBtr0331729;FBtr0071222	26.9799	26.9131	27.0467	26.9351	26.3403	26.356	26.1764	26.8021	0.109676	0.798054	0.54998	FALSE	CG11284
FBtr0345985;FBtr0071225	29.4703	29.035	29.1161	29.1273	29.5014	29.5515	29.4628	29.732	0.189036	0.751318	-0.37472	FALSE	Ppt1
FBtr0071228	21.8798	21.8798	21.8798	21.8798	21.8798	21.8798	21.8798	21.8798	0.500905	0	0	FALSE	Caf1-180
FBtr0332628;FBtr0300731;FBtr0071231;FBtr0071230	23.8333	24.1229	21.8798	21.8798	23.8124	24.2534	23.258	23.9392	0.500905	0.458882	-0.886802	FALSE	spirit
FBtr0331726;FBtr0071232	21.8798	21.8798	21.8798	21.8798	27.7474	27.2185	27.4015	27.3376	8.35908e-07	0.93424	-5.54646	TRUE	CG12111
FBtr0071234	21.8798	21.8798	21.8798	21.8798	21.8798	21.8798	21.8798	21.8798	0.500905	0	0	FALSE	IntS4
FBtr0071235	21.8798	21.8798	21.8798	23.2605	24.1755	22.92	24.314	22.8717	0.294294	0.678508	-1.34535	FALSE	PIP82
FBtr0343354;FBtr0071239;FBtr0343355;FBtr0071243	21.8798	21.8798	21.8798	21.8798	21.3866	21.8798	24.0169	21.8798	0.648539	0.257079	-0.410992	FALSE	CG33223;CG32713
FBtr0071241	29.4164	29.5225	29.4747	29.5299	29.064	29.0573	29.0124	28.8291	0.00771332	0.89554	0.495173	FALSE	Sptr
FBtr0071242;FBtr0302500	30.8423	30.1532	30.0513	30.781	30.3369	29.7058	29.8958	29.9513	0.450056	0.587495	0.48445	FALSE	CG15347
FBtr0071245	21.8798	24.275	21.8798	21.8798	23.1898	24.8696	21.8798	25.4157	0.500905	0.452503	-1.36012	FALSE	CG12123
FBtr0345986;FBtr0300383;FBtr0071246	25.6885	25.2602	25.7252	25.7114	26.4043	26.1022	26.9614	26.0007	0.207482	0.740038	-0.770818	FALSE	CG12125
FBtr0071249	30.3729	30.8995	30.5279	30.7865	30.4164	30.7585	30.4851	30.5394	0.654554	0.252776	0.0968647	FALSE	Hexo2
FBtr0071250	21.8798	21.8798	21.8798	21.8798	21.8798	21.8798	21.8798	21.8798	0.500905	0	0	FALSE	CG1785
FBtr0346163;FBtr0071255	21.8798	25.3864	21.8798	21.8798	21.8798	21.8798	21.8798	21.8798	0.500905	0.353553	0.876648	FALSE	Rbm13
FBtr0071263	28.804	28.2026	29.1325	28.8602	27.3641	28.5164	28.4993	28.6591	0.500905	0.455471	0.490119	FALSE	CG10962
FBtr0333605;FBtr0333604;FBtr0310067;FBtr0071267;FBtr0071266	28.2671	28.2178	28.3965	28.7717	28.4151	28.0894	28.1597	28.0375	0.500905	0.506715	0.237862	FALSE	e(r)
FBtr0333606;FBtr0071268	31.951	31.4813	32.1791	31.9993	31.2404	31.3826	31.8389	31.686	0.500905	0.555535	0.36569	FALSE	CG1885
FBtr0071277;FBtr0071276;FBtr0071275;FBtr0071274;FBtr0071273;FBtr0071269;FBtr0308194;FBtr0071278;FBtr0331601;FBtr0071271;FBtr0308193;FBtr0071270;FBtr0071272	33.2106	33.5598	33.4676	33.5451	33.3315	33.2876	33.1801	33.3062	0.462944	0.579867	0.169422	FALSE	Moe
FBtr0071280;FBtr0344164	23.8051	23.5113	24.3116	21.8798	25.4525	23.7091	23.2492	22.9502	0.698304	0.22376	-0.463346	FALSE	l(1)G0020
FBtr0346167;FBtr0332960;FBtr0332958;FBtr0332957;FBtr0071281	29.1166	29.7633	29.2812	29.0267	30.0062	29.7819	29.5363	29.5946	0.377639	0.627418	-0.432813	FALSE	CG2004
FBtr0309871;FBtr0301805;FBtr0071284	26.2732	24.8301	24.0707	26.1058	21.8798	21.8798	21.8798	23.6569	0.0847757	0.815016	2.99591	FALSE	HP1b
FBtr0309872;FBtr0071285	21.8798	21.8798	21.8798	21.8798	21.8798	21.8798	21.8798	21.8798	0.500905	0	0	FALSE	APC4
FBtr0071286	21.8798	21.8798	21.8798	21.8798	21.8798	21.8798	21.8798	21.8798	0.500905	0	0	FALSE	CG32708
FBtr0071289	32.8991	33.0958	33.2078	32.8252	33.0757	32.8751	33.1663	33.1567	0.724145	0.206319	-0.0614615	FALSE	CG7033
FBtr0071293	25.789	25.7177	25.8165	26.2955	25.5825	25.1725	23.4593	24.3194	0.291505	0.680375	1.27124	FALSE	Arfrp1
FBtr0333808;FBtr0309254;FBtr0112965;FBtr0071298;FBtr0071295;FBtr0309255;FBtr0071297	24.9538	24.3495	23.4022	24.9284	23.0624	24.7251	23.6952	24.9312	0.733773	0.199461	0.305003	FALSE	AP-1gamma
FBtr0071299	21.8798	21.8798	21.8798	21.8798	21.8798	23.3509	21.8798	23.2726	0.500905	0.539793	-0.715999	FALSE	CG7065
FBtr0071300	23.2271	25.2159	23.0462	21.8798	21.8798	21.8798	21.8798	22.8054	0.500905	0.530494	1.23105	FALSE	dalao
FBtr0071302;FBtr0333472	25.5337	23.7848	23.9271	21.8798	24.2158	23.2542	22.333	23.4012	0.715375	0.212312	0.480283	FALSE	Dip1
FBtr0333475;FBtr0333473;FBtr0071303;FBtr0340341;FBtr0333474	21.8798	21.8798	23.6132	21.8798	23.4761	24.2009	21.8798	23.9973	0.500905	0.50674	-1.07537	FALSE	mei-P26
FBtr0332623;FBtr0071304	21.8798	21.8798	21.8798	21.8798	21.8798	21.8798	21.8798	21.8798	0.500905	0	0	FALSE	CG12057
FBtr0071305	26.7238	26.9123	26.8011	26.5818	26.5761	26.7335	26.8721	26.7976	0.950904	0.0402327	0.00988331	FALSE	CG12056
FBtr0071306	24.0657	22.2462	24.3883	24.273	22.1201	26.2099	23.188	23.909	0.947495	0.0431971	-0.11345	FALSE	CG12106
FBtr0346164;FBtr0071309	32.3882	31.9816	32.0376	32.3558	31.3561	31.3521	31.0717	30.9931	0.0142387	0.883642	0.997565	FALSE	CG15369
FBtr0071313;FBtr0340120	27.1552	27.4676	27.3277	27.4588	27.7191	27.5857	27.5912	27.3313	0.48243	0.567794	-0.20447	FALSE	Dsor1
FBtr0340121;FBtr0340122;FBtr0071315;FBtr0340123;FBtr0071316;FBtr0071314	24.5136	24.4653	23.6363	21.8798	24.2776	21.8798	21.8798	21.8798	0.500905	0.446982	1.14451	FALSE	CG17754
FBtr0346166;FBtr0071317	25.3469	25.5011	26.542	23.8219	26.4537	25.7061	27.1122	26.7927	0.473834	0.574447	-1.21319	FALSE	ric8a
FBtr0339949;FBtr0071319	25.9239	26.195	24.8399	23.4617	24.7035	25.852	26.6962	21.8798	0.871452	0.100269	0.322249	FALSE	CG16892
FBtr0071321;FBtr0334929	27.4598	27.4616	27.9988	27.3192	27.7221	27.6653	27.7292	27.3948	0.803788	0.151073	-0.0679807	FALSE	c12.2
FBtr0071324	23.8356	21.8798	23.7199	23.6208	21.8798	23.5292	22.9695	23.263	0.699462	0.223011	0.353658	FALSE	c12.1
FBtr0343368;FBtr0071326	28.7742	29.6885	29.929	29.1406	29.5165	29.4407	29.4452	29.63	0.76763	0.176717	-0.124995	FALSE	c11.1
FBtr0302964;FBtr0071327	21.8798	21.8798	21.8798	21.8798	21.8798	21.8798	21.8798	21.8798	0.500905	0	0	FALSE	Cfp1
FBtr0343367;FBtr0071332	21.8798	21.8798	21.8798	21.8798	21.8798	21.8798	21.8798	21.8798	0.500905	0	0	FALSE	mxc
FBtr0071334	21.8798	25.5069	21.8798	22.6001	23.6854	22.534	23.5348	25.2178	0.61863	0.276085	-0.776383	FALSE	CG12121
FBtr0340327;FBtr0071335	31.6974	31.5877	31.4386	31.4918	31.6085	31.4123	31.4511	31.4609	0.504558	0.350643	0.0706845	FALSE	t
FBtr0340494;FBtr0071336	30.038	30.2331	30.4585	30.202	29.8165	29.442	29.994	29.9585	0.253701	0.705209	0.43012	FALSE	CG12119
FBtr0071338	30.1846	30.5128	30.5986	30.4049	30.6122	30.2613	30.4873	30.5971	0.735126	0.198685	-0.0642543	FALSE	su(r)
FBtr0071341	21.8798	21.8798	21.8798	21.8798	21.8798	21.8798	21.8798	21.8798	0.500905	0	0	FALSE	CG12115
FBtr0071342	28.1661	28.0031	28.0013	28.0753	27.3435	27.6491	27.7938	27.9208	0.23812	0.720212	0.384624	FALSE	Zpr1
FBtr0340342;FBtr0071343	30.7668	30.263	30.7342	30.7017	30.1387	30.4257	30.3937	30.6546	0.500905	0.449834	0.213284	FALSE	CG9034
FBtr0071344	29.7734	30.9251	30.6604	30.5144	30.9428	30.688	30.6804	30.7208	0.500905	0.394229	-0.289686	FALSE	Ost48
FBtr0340343;FBtr0333537;FBtr0333536;FBtr0079010;FBtr0071347;FBtr0071346;FBtr0071345	22.7141	23.2229	21.8798	24.3389	24.5534	22.7314	21.8798	24.0554	0.836923	0.126053	-0.266061	FALSE	His3.3B;His3.3A
FBtr0071348	28.1985	27.939	27.6507	28.2675	27.4368	27.4924	27.3659	27.2232	0.0962814	0.806973	0.634381	FALSE	fh
FBtr0333809;FBtr0071350	24.5657	21.8798	23.2639	21.9892	24.2588	21.8798	21.8798	21.8798	0.742024	0.193963	0.450132	FALSE	Bx42
FBtr0114595;FBtr0071351;FBtr0114594	26.8523	23.8906	27.235	26.2203	26.9106	26.6327	27.5761	27.3015	0.500905	0.45332	-1.05565	FALSE	CG7766
FBtr0071353	21.8798	23.1089	21.8798	21.8798	21.8798	23.7204	25.1549	23.9136	0.442797	0.590732	-1.48011	FALSE	CG7246
FBtr0071358	21.8798	21.8798	21.8798	21.8798	21.8798	21.8798	21.8798	21.8798	0.500905	0	0	FALSE	BCL7-like
FBtr0343411;FBtr0071360	33.5729	32.7869	33.2818	33.6452	32.823	32.8624	32.9926	33.0605	0.471781	0.575416	0.387092	FALSE	RpS28b
FBtr0071361;FBtr0333335;FBtr0071362	31.9621	32.028	31.9075	31.6852	32.0908	31.5941	31.7832	31.9296	0.82405	0.135197	0.0462598	FALSE	Hex-A
FBtr0071363	26.2386	27.1383	26.9422	26.7933	27.2712	26.4207	23.8422	23.889	0.500905	0.507612	1.4223	FALSE	Gga
FBtr0071366	26.9659	26.8248	27.1643	27.481	26.9515	26.9093	24.4953	27.2181	0.500905	0.382367	0.715454	FALSE	Aats-lys
FBtr0071368	25.4437	25.0408	26.2064	25.9794	25.5492	23.8095	25.1467	23.3036	0.428425	0.599058	1.21536	FALSE	Lst8
FBtr0343412;FBtr0071372	30.5941	29.8918	30.3383	30.0322	29.7304	30.2446	30.694	30.2367	0.976901	0.0186892	-0.0123336	FALSE	l(1)G0320
FBtr0346170;FBtr0336923;FBtr0307489;FBtr0071386	21.8798	21.8798	21.8798	21.8798	21.8798	21.8798	21.8798	21.8798	0.500905	0	0	FALSE	CG32698
FBtr0071387	23.8181	23.2929	22.8152	26.2672	23.6963	26.293	26.2853	26.2589	0.500905	0.507119	-1.58503	FALSE	Ser7
FBtr0071388	21.8798	21.8798	21.8798	21.8798	21.8798	21.8798	21.8798	21.8798	0.500905	0	0	FALSE	CG1468
FBtr0071389	23.9306	27.6562	27.8633	26.9459	26.7941	26.8121	28.1325	23.3751	0.887253	0.0892402	0.320557	FALSE	CG9686
FBtr0340682;FBtr0071390	21.8798	21.8798	21.8798	21.8798	21.8798	21.8798	21.8798	21.8798	0.500905	0	0	FALSE	CG9689
FBtr0071392;FBtr0071391	29.5061	29.1798	28.8725	29.4433	28.9493	28.8269	28.7788	29.1744	0.481627	0.569286	0.318066	FALSE	CG9691
FBtr0343030;FBtr0071394;FBtr0071393	34.714	34.3556	34.3237	34.5412	34.1012	34.1121	33.9651	33.8688	0.0829362	0.816564	0.471846	FALSE	Idgf4
FBtr0333521;FBtr0302723;FBtr0071402;FBtr0302722	21.8798	21.8798	21.8798	21.8798	21.8798	21.8798	21.8798	21.8798	0.500905	0	0	FALSE	nej
FBtr0346168;FBtr0071403	21.8798	21.8798	23.233	21.8798	23.1395	21.8798	24.1834	21.8798	0.571078	0.306067	-0.55252	FALSE	CG3106
FBtr0303558;FBtr0071404;FBtr0071406;FBtr0071405;FBtr0100193;FBtr0333427;FBtr0303559;FBtr0100192;FBtr0071407	26.2792	26.391	26.5328	25.9377	26.7783	26.7787	26.4292	26.7321	0.293214	0.679589	-0.394415	FALSE	l(1)G0232
FBtr0112969;FBtr0071408;FBtr0336905	24.0518	24.0023	23.1746	26.3538	24.2881	23.5494	24.81	25.0189	0.984873	0.0105683	-0.0209623	FALSE	CG1889
FBtr0307382;FBtr0071410	29.5295	29.3095	29.2256	29.6364	28.9129	29.5183	29.0959	29.1248	0.500905	0.52247	0.262288	FALSE	CG32694
FBtr0307381;FBtr0071412;FBtr0071411	28.6131	28.6208	28.6856	28.225	28.5215	28.5835	28.8669	28.1432	0.98003	0.0154379	0.00736544	FALSE	CG32694
FBtr0071415;FBtr0112971	21.8798	21.8798	21.8798	21.8798	21.8798	21.8798	21.8798	21.8798	0.500905	0	0	FALSE	CG2990
FBtr0346261;FBtr0071419	29.5814	30.3281	28.2649	27.5201	30.6467	30.1025	28.3769	29.5965	0.524139	0.338103	-0.757011	FALSE	Yp1
FBtr0339648;FBtr0071424	30.288	30.3808	29.2287	29.2442	30.1971	29.9356	28.2364	28.8906	0.572334	0.305207	0.470545	FALSE	Yp2
FBtr0340473;FBtr0071430	24.9028	21.8798	21.8798	24.9663	21.8798	21.8798	21.8798	21.8798	0.500905	0.540023	1.52738	FALSE	CG2972
FBtr0343981;FBtr0332896;FBtr0071438	34.4057	33.8292	34.1582	34.6397	33.8197	33.8664	33.897	33.8155	0.34418	0.646104	0.408546	FALSE	l(1)G0230
FBtr0114585;FBtr0071439;FBtr0343023;FBtr0112675;FBtr0343022;FBtr0343025;FBtr0343026;FBtr0343024;FBtr0114584;FBtr0343027	24.2971	23.615	23.0753	21.8247	24.0589	23.0743	26.0573	22.9982	0.521401	0.339879	-0.844172	FALSE	CG34408
FBtr0071444	21.8798	21.8798	21.8798	21.8798	21.8798	21.8798	23.5584	21.8798	0.500905	0.353553	-0.419667	FALSE	CG17841
FBtr0071446;FBtr0333305;FBtr0071447	28.4201	28.9402	28.679	28.4562	28.879	28.3169	28.7339	28.3273	0.844297	0.120917	0.059589	FALSE	flw
FBtr0332952;FBtr0071449	30.9906	30.9081	30.1881	29.9262	30.2735	30.255	30.102	30.8406	0.784348	0.164536	0.135462	FALSE	Neb-cGP
FBtr0071453;FBtr0071452;FBtr0071451;FBtr0336899	28.836	28.0327	28.157	28.8259	27.4449	28.1603	27.3619	28.3247	0.454089	0.58564	0.639941	FALSE	PPP4R2r
FBtr0332953;FBtr0307488;FBtr0071461;FBtr0071460	26.5304	27.4031	26.7371	26.6179	26.0715	27.0936	25.0369	25.3351	0.481627	0.569392	0.937859	FALSE	nocte
FBtr0346350;FBtr0333306;FBtr0071465	21.8798	21.8798	21.8798	21.8798	21.8798	21.8798	21.8798	21.8798	0.500905	0	0	FALSE	Psf3
FBtr0071469	21.8798	21.8798	21.8798	21.8798	21.8798	21.8798	21.8798	21.8798	0.500905	0	0	FALSE	CG32679
FBtr0347009;FBtr0347008;FBtr0071470	27.6308	27.5525	28.0459	27.5769	27.6514	27.5415	27.7216	27.5796	0.680497	0.235162	0.078004	FALSE	l(1)G0289
FBtr0071472	32.4374	32.0015	32.2935	32.4084	31.622	31.589	31.6986	31.6853	0.0243485	0.869731	0.636483	FALSE	Gip
FBtr0071481	24.4555	21.8798	24.6135	24.9767	21.8798	24.1615	21.8798	22.4066	0.500905	0.504605	1.39947	FALSE	CG12643
FBtr0346337;FBtr0346336;FBtr0071484	21.8798	21.8798	21.8798	21.8798	21.8798	21.8798	21.8798	21.8798	0.500905	0	0	FALSE	Ipod
FBtr0071486	21.8798	21.8798	21.8798	21.8798	21.8798	21.8798	21.8798	21.8798	0.500905	0	0	FALSE	CG2962
FBtr0332900;FBtr0332899;FBtr0332898;FBtr0112974;FBtr0071487	21.8798	21.8798	21.8798	21.8798	21.8798	21.8798	21.8798	21.8798	0.500905	0	0	FALSE	CG15309
FBtr0071489;FBtr0308583;FBtr0308584;FBtr0308582	21.8798	21.8798	21.8798	21.8798	21.8798	21.8798	21.8798	21.8798	0.500905	0	0	FALSE	ZAP3
FBtr0071491	23.8921	23.9081	23.3336	21.8798	24.993	25.0288	25.0486	21.8798	0.500905	0.374568	-0.984129	FALSE	CG2124
FBtr0343043;FBtr0332294;FBtr0071495;FBtr0071494	30.0368	30.0515	30.2208	30.122	29.7486	29.7008	29.796	29.5546	0.025614	0.867763	0.407796	FALSE	ras
FBtr0071498	29.5611	29.5225	29.305	29.5867	29.2632	29.4335	29.4906	29.2596	0.500905	0.491552	0.132128	FALSE	Atg8a
FBtr0346377;FBtr0334457;FBtr0300569;FBtr0071501;FBtr0071500;FBtr0071499	25.7117	26.438	26.769	26.1143	26.2331	26.2616	27.1436	27.2282	0.500905	0.437835	-0.458333	FALSE	Tango5
FBtr0310444;FBtr0071510	21.8798	21.8798	21.8798	21.8798	22.4454	21.8798	21.8798	21.8798	0.500905	0.353553	-0.141402	FALSE	CG1628
FBtr0071511	21.8798	21.8798	21.8798	21.8798	23.8939	21.8798	23.5917	23.5372	0.23812	0.720179	-1.34586	FALSE	Hmr
FBtr0071515;FBtr0332465;FBtr0113368;FBtr0342794	21.8798	21.8798	21.8798	21.8798	21.8798	21.8798	21.8798	21.8798	0.500905	0	0	FALSE	Ipk1
FBtr0071519	34.1128	34.4518	34.2997	34.3716	34.6324	34.3768	34.4327	34.2604	0.500905	0.382666	-0.116643	FALSE	Act57B
FBtr0071520	29.3695	29.1518	29.2107	28.3545	29.0582	29.1585	29.2816	28.9671	0.804258	0.150737	-0.0947491	FALSE	CG9344
FBtr0071522	32.4841	32.1049	32.3719	32.6704	32.1032	32.0918	32.47	32.2677	0.500905	0.406536	0.174675	FALSE	Prosalpha3
FBtr0332593;FBtr0071524;FBtr0332594;FBtr0303195	21.8798	22.8974	24.0602	21.8798	24.1686	21.8798	21.8798	21.8798	0.857201	0.111552	0.227292	FALSE	CG10543
FBtr0071526	23.6433	22.032	22.8981	21.8798	21.8798	23.8092	23.6358	23.7631	0.500905	0.372029	-0.65871	FALSE	CG9346
FBtr0310056;FBtr0113371;FBtr0071528;FBtr0301898;FBtr0342839;FBtr0310057;FBtr0113369;FBtr0071527;FBtr0301902;FBtr0301894;FBtr0301901;FBtr0301896	23.7351	22.5247	24.9433	23.0827	25.9406	26.055	26.7078	26.7314	0.0533333	0.83911	-2.78725	FALSE	RIC-3
FBtr0071530	29.9896	30.4764	30.0654	29.9738	30.0769	30.6099	30.4396	30.3106	0.500905	0.470949	-0.232957	FALSE	CG9350
FBtr0071532	30.3694	30.173	30.0467	30.5493	30.48	30.4167	30.4978	30.2615	0.500905	0.369623	-0.129389	FALSE	cpa
FBtr0071533	26.5411	26.5591	26.6501	27.1634	26.4185	26.723	26.7331	26.7296	0.769714	0.17468	0.0773587	FALSE	mRpL54
FBtr0071534	24.6672	21.8798	23.5206	21.8798	24.4152	21.8798	24.3565	21.8798	0.931698	0.0560117	-0.145965	FALSE	Cht8
FBtr0332423;FBtr0071537;FBtr0071536;FBtr0071535;FBtr0071540;FBtr0071539;FBtr0071538	31.6837	31.7305	31.5324	31.6868	31.7754	31.8105	31.7071	31.6227	0.500905	0.405488	-0.070593	FALSE	Treh
FBtr0071541	34.2594	33.8839	33.9052	33.6555	33.7485	33.6239	33.4113	33.5299	0.324071	0.657343	0.34764	FALSE	CG10527
FBtr0071542	21.8798	21.8798	21.8798	21.8798	21.8798	21.8798	21.8798	21.8798	0.500905	0	0	FALSE	Cht9
FBtr0071543	21.8798	21.8798	21.8798	21.8798	21.8798	21.8798	21.8798	21.8798	0.500905	0	0	FALSE	Cht4
FBtr0071545	21.8798	21.8798	21.8798	21.8798	21.8798	21.8798	21.8798	21.8798	0.500905	0	0	FALSE	CG15653
FBtr0071546	28.1272	28.3709	27.8974	28.5057	28.6309	28.2012	28.0795	27.9761	0.990481	0.00655107	0.00337846	FALSE	shg
FBtr0071547	25.4544	26.8947	26.5389	25.8173	26.6186	25.4749	25.3197	26.9686	0.927667	0.0585875	0.0808617	FALSE	CG3295
FBtr0071549	29.5082	29.1518	29.1847	29.3639	28.6863	29.3619	29.1636	29.5164	0.697634	0.22429	0.120108	FALSE	CG30291
FBtr0345667;FBtr0071554	26.4881	21.8798	23.3754	26.4944	21.8798	25.0917	23.7545	21.8798	0.500905	0.356	1.40799	FALSE	CG15650
FBtr0300563;FBtr0071555	21.8798	21.8798	21.8798	21.8798	21.8798	21.8798	21.8798	21.8798	0.500905	0	0	FALSE	CG15649
FBtr0071560	21.8798	21.8798	21.8798	23.3198	23.8596	21.8798	21.8798	23.7655	0.541212	0.326655	-0.606401	FALSE	CG9993
FBtr0344196;FBtr0342801;FBtr0071563	21.8798	26.2047	23.8565	21.8798	21.8798	21.8798	21.8798	21.8798	0.500905	0.496086	1.57541	FALSE	sktl
FBtr0345356;FBtr0071567	29.1861	28.6735	28.5619	29.0871	28.1332	28.831	28.3145	28.7571	0.500905	0.514669	0.368224	FALSE	CG9394
FBtr0071569	28.4558	28.921	26.9289	26.0716	28.3909	28.798	28.7215	26.8261	0.631889	0.267436	-0.589814	FALSE	mago
FBtr0071573	21.8798	21.8798	21.8798	21.8798	21.8798	21.8798	21.8798	21.8798	0.500905	0	0	FALSE	Hmg-2
FBtr0071576	21.8798	21.8798	21.8798	21.8798	21.8798	21.8798	21.8798	21.8798	0.500905	0	0	FALSE	Xpd
FBtr0071580;FBtr0071579	21.8798	21.8798	21.8798	21.8798	21.8798	21.8798	21.8798	21.8798	0.500905	0	0	FALSE	Pu
FBtr0305669;FBtr0071593;FBtr0071592	31.1724	31.4329	31.1767	31.6055	31.0519	31.2255	30.9444	31.0542	0.353097	0.641169	0.277856	FALSE	RpL29
FBtr0071600;FBtr0310327;FBtr0300395;FBtr0071599;FBtr0300394	21.8798	21.8798	21.8798	21.8798	25.1025	23.3959	25.0735	24.5025	0.018578	0.877203	-2.63881	FALSE	CG9485
FBtr0342891;FBtr0071606	27.2334	27.6798	27.4123	27.6885	27.8569	28.0091	28.1567	27.5705	0.339317	0.649576	-0.394804	FALSE	Acox57D-p
FBtr0071607	21.8798	21.8798	21.8798	21.8798	21.8798	21.8798	21.8798	21.8798	0.500905	0	0	FALSE	Acox57D-d
FBtr0071611	21.8798	21.8798	21.8798	21.8798	21.8798	21.8798	21.8798	21.8798	0.500905	0	0	FALSE	CG17974
FBtr0071612	21.8798	21.8798	21.8798	21.8798	21.8798	21.8798	21.8798	21.8798	0.500905	0	0	FALSE	CG9822
FBtr0071615	21.8798	21.8798	21.8798	21.8798	21.8798	21.8798	21.8798	21.8798	0.500905	0	0	FALSE	CG9754
FBtr0071616	27.7471	26.861	27.4752	27.898	27.2355	26.0078	28.2259	27.6943	0.809918	0.146709	0.20444	FALSE	CG9752
FBtr0342888;FBtr0071617	23.8272	23.5544	21.8798	24.6563	23.33	21.8798	21.8798	23.8256	0.510107	0.346687	0.75061	FALSE	Sgf29
FBtr0342889;FBtr0071618	27.2087	27.1224	27.0954	26.497	27.0499	27.1606	27.4054	26.8382	0.669481	0.242969	-0.132652	FALSE	CG30392
FBtr0071619	21.8798	21.8798	21.8798	21.8798	21.8798	21.8798	21.8798	21.8798	0.500905	0	0	FALSE	CG10505
FBtr0110814;FBtr0071624	21.8798	21.8798	21.8798	21.8798	21.8798	21.8798	21.8798	21.8798	0.500905	0	0	FALSE	CG15661
FBtr0071625	29.2732	29.2355	29.4456	29.1804	28.7924	29.1012	29.3405	29.2952	0.500905	0.384272	0.151356	FALSE	CG4302
FBtr0071627	21.8798	21.8798	21.8798	21.8798	21.8798	21.8798	23.1494	21.8798	0.500905	0.353553	-0.317402	FALSE	CG4286
FBtr0071628	28.4426	28.5272	28.4239	28.6789	28.5716	28.1645	28.2703	27.9309	0.457029	0.583788	0.283816	FALSE	LSm1
FBtr0342871;FBtr0071629;FBtr0113100	25.9725	26.7403	25.9897	26.1311	26.2884	23.4262	23.1551	25.7482	0.474011	0.573584	1.55394	FALSE	CG4266
FBtr0310423;FBtr0071633;FBtr0071632;FBtr0330236;FBtr0330235	21.8798	21.8798	21.8798	21.8798	21.8798	21.8798	21.8798	21.8798	0.500905	0	0	FALSE	CG30389
FBtr0342874;FBtr0342873;FBtr0071636	22.1968	25.1711	24	23.1559	21.8798	21.8798	21.8798	21.8798	0.259601	0.700901	1.75118	FALSE	Magi
FBtr0071638;FBtr0071637	23.1664	24.7109	22.7849	24.9286	21.8798	21.8798	21.8798	21.8798	0.133845	0.782398	2.01794	FALSE	CG4050
FBtr0071639	29.7021	29.7723	29.6768	30.0783	29.4567	29.3744	29.4657	29.1734	0.125143	0.788147	0.439811	FALSE	CG4038
FBtr0071640	21.8798	24.6453	21.8798	22.5278	21.8798	21.8798	21.8798	24.0975	0.829341	0.131667	0.298966	FALSE	Rbpn-5
FBtr0071641	24.3757	25.0761	22.6025	21.8798	22.9645	23.794	23.3121	23.3756	0.924417	0.0607279	0.121953	FALSE	Sara
FBtr0071653;FBtr0071654	23.9918	24.7618	21.8798	22.7597	26.6245	21.8798	21.8798	25.6512	0.767404	0.176929	-0.660552	FALSE	Egfr
FBtr0304728;FBtr0071658	23.9897	21.8798	23.5898	21.8798	23.1365	24.201	22.1049	21.8798	0.997087	0.00207859	0.00419566	FALSE	mahj
FBtr0342954;FBtr0071659	31.6902	31.685	31.8483	31.2373	31.6311	32.2536	31.6634	31.943	0.500905	0.442661	-0.257566	FALSE	CG15674
FBtr0071662;FBtr0071661	21.8798	24.0036	21.8798	21.8798	24.0076	21.8798	21.8798	21.8798	0.999248	0.000500725	-0.000985483	FALSE	CG10082
FBtr0300680;FBtr0300679;FBtr0113102;FBtr0113101;FBtr0071663	31.6591	31.9125	31.8524	31.7563	31.7327	31.9477	31.9881	31.9186	0.500905	0.433975	-0.101685	FALSE	CG10320
FBtr0071666	23.7797	25.151	24.0419	24.7586	24.6245	24.1166	23.4184	23.9007	0.500905	0.36433	0.417774	FALSE	NC2alpha
FBtr0071670	31.1174	31.6946	31.3203	30.8733	31.7071	31.6809	31.4482	31.02	0.545822	0.323545	-0.212667	FALSE	CG10306
FBtr0342959;FBtr0071672	21.8798	21.8798	21.8798	23.5679	26.1618	22.6575	23.5558	21.8798	0.500905	0.420925	-1.26192	FALSE	Ppcdc
FBtr0345488;FBtr0342960;FBtr0071674;FBtr0071673	30.1579	30.1338	29.5767	29.7333	29.9071	29.1926	29.0546	29.9421	0.500905	0.456632	0.376315	FALSE	HmgZ
FBtr0071677;FBtr0071676	27.9228	27.1239	27.7459	27.9545	26.7314	27.3125	26.9477	27.4398	0.357889	0.638766	0.578906	FALSE	Tim10
FBtr0071679	21.8798	21.8798	21.8798	21.8798	21.8798	21.8798	21.8798	21.8798	0.500905	0	0	FALSE	Tbp
FBtr0071683	28.5928	28.3266	28.5072	28.1685	28.2341	28.4501	28.2008	28.5707	0.869355	0.102203	0.0348709	FALSE	Rae1
FBtr0071687	27.1155	27.3709	27.2905	26.2647	25.5031	23.9605	25.9237	26.6741	0.333068	0.652997	1.49501	FALSE	clt
FBtr0345664;FBtr0071688	24.3592	23.9038	21.8798	22.0132	23.0913	21.8798	21.6526	23.7528	0.726436	0.20467	0.444909	FALSE	CG18870
FBtr0344882;FBtr0071690	25.1327	24.3199	21.8798	26.6026	21.8798	21.8798	21.8798	21.8798	0.28458	0.685128	2.60398	FALSE	CG10433
FBtr0071701	21.8798	21.8798	21.8798	21.8798	21.8798	21.8798	21.8798	21.8798	0.500905	0	0	FALSE	TAF1C-like
FBtr0342897;FBtr0342896;FBtr0300397;FBtr0071703	29.479	28.4677	27.8269	29.5374	27.4865	23.8619	28.4526	28.0675	0.500905	0.52107	1.86059	FALSE	Fkbp14
FBtr0273206;FBtr0071706;FBtr0342893;FBtr0342894;FBtr0342892;FBtr0071707;FBtr0342895	25.4491	24.3522	21.8798	24.3208	23.6827	25.5236	26.5839	21.8798	0.840429	0.123152	-0.417024	FALSE	Sdc
FBtr0345487;FBtr0301410;FBtr0071709;FBtr0071708	29.9596	29.0083	29.2371	29.1933	29.6478	29.8157	29.5233	29.5119	0.500905	0.423908	-0.275108	FALSE	HmgD
FBtr0071712;FBtr0071711;FBtr0071713	26.238	25.968	25.6562	26.5451	26.8808	26.6091	27.2398	27.1401	0.140288	0.777351	-0.865645	FALSE	LBR
FBtr0071714	21.8798	21.8798	21.8798	21.8798	25.2875	24.4694	23.7585	24.2899	0.00771332	0.895492	-2.57153	TRUE	Grx-1
FBtr0071716	21.8798	21.8798	21.8798	21.8798	23.789	26.4012	24.8152	26.3958	0.0394297	0.852385	-3.47052	FALSE	CG4021
FBtr0071739	21.8798	23.5243	21.8798	21.8798	21.8798	21.8798	21.8798	21.8798	0.500905	0.353553	0.41112	FALSE	CG4377
FBtr0071740	26.6909	25.4439	26.3634	26.9516	22.489	21.8798	24.3029	23.1516	0.0369967	0.85567	3.40657	FALSE	CG4363
FBtr0071743	21.8798	21.8798	21.8798	21.8798	21.8798	23.702	21.8798	21.8798	0.500905	0.353553	-0.455551	FALSE	CG4386
FBtr0071744	22.9846	21.8798	23.6724	22.3936	21.8798	23.9714	25.0414	26.0223	0.500905	0.499071	-1.4961	FALSE	CG18735
FBtr0071745	24.7955	25.0344	25.0919	24.6705	23.0962	24.011	21.8798	24.0816	0.216714	0.73532	1.63092	FALSE	lox2
FBtr0071747;FBtr0071746;FBtr0342965	28.1624	27.9064	28.2089	27.8709	28.1422	28.1773	28.0072	28.4561	0.500905	0.422124	-0.158503	FALSE	Tango11
FBtr0308239;FBtr0071757;FBtr0071756	26.6881	26.308	27.2801	27.3802	27.3664	27.529	27.5767	27.6734	0.334136	0.652123	-0.62227	FALSE	Synj
FBtr0071758	23.6896	25.143	23.7844	23.5609	23.4936	26.8866	23.348	23.344	0.88694	0.0896143	-0.223558	FALSE	CG6613
FBtr0071760	23.7599	21.8798	24.7158	24.7049	21.8798	21.8798	21.8798	21.8798	0.25163	0.706826	1.88531	FALSE	CG30281
FBtr0342979;FBtr0071761	21.8798	21.8798	21.8798	21.8798	21.8798	21.8798	21.8798	21.8798	0.500905	0	0	FALSE	mei-S332
FBtr0308350;FBtr0071762	23.5875	22.438	24.6577	22.8218	25.4813	21.8798	24.7326	24.2577	0.609427	0.281924	-0.711592	FALSE	NtR
FBtr0071766	21.8798	21.8798	21.8798	21.8798	25.5779	25.2075	26.4078	25.9633	0.000356698	0.923467	-3.90935	TRUE	gom
FBtr0071767	21.8798	21.8798	21.8798	21.8798	21.8798	21.8798	21.8798	21.8798	0.500905	0	0	FALSE	CG6758
FBtr0071770	21.8798	21.8798	21.8798	21.8798	21.8798	21.8798	21.8798	21.8798	0.500905	0	0	FALSE	MED16
FBtr0071772;FBtr0071771	29.2503	29.6341	29.5231	29.2994	29.6904	29.7262	30.2006	29.8312	0.239212	0.718717	-0.435377	FALSE	Vps35
FBtr0071774	21.8798	21.8798	21.8798	21.8798	21.8798	21.8798	21.8798	21.8798	0.500905	0	0	FALSE	ari-2
FBtr0071776;FBtr0071775	21.8798	21.8798	21.8798	21.8798	21.8798	21.8798	21.8798	21.8798	0.500905	0	0	FALSE	dve
FBtr0301476;FBtr0113105;FBtr0071777	21.8798	22.7171	21.8798	21.8798	24.6158	21.8798	21.8798	21.8798	0.667382	0.244591	-0.474669	FALSE	Oatp58Dc
FBtr0345581;FBtr0071781	21.8798	21.8798	21.8798	21.8798	21.8798	21.8798	21.8798	21.8798	0.500905	0	0	FALSE	CG3264
FBtr0071782	21.8798	21.8798	21.8798	21.8798	21.8798	21.8798	24.9807	24.2874	0.500905	0.534447	-1.37714	FALSE	CG3290
FBtr0071783	21.8798	21.8798	21.8798	21.8798	21.8798	21.8798	21.8798	21.8798	0.500905	0	0	FALSE	CG3292
FBtr0071785;FBtr0071784	30.9305	30.4204	30.5685	30.7077	30.6183	30.637	30.3811	30.4839	0.500905	0.359834	0.126656	FALSE	Swim
FBtr0071787	21.8798	21.8798	21.8798	21.8798	21.8798	21.8798	21.8798	21.8798	0.500905	0	0	FALSE	CG3045
FBtr0071790	27.2548	27.1016	26.6668	28.0109	23.5973	26.3979	27.2048	27.383	0.500905	0.414255	1.11282	FALSE	GM130
FBtr0302298;FBtr0071792;FBtr0302295;FBtr0071795;FBtr0071794;FBtr0071793;FBtr0071791;FBtr0071796;FBtr0342980;FBtr0302297;FBtr0302296;FBtr0113104	21.8798	21.8798	21.8798	21.8798	21.8798	21.8798	21.8798	21.8798	0.500905	0	0	FALSE	Vrp1
FBtr0336636;FBtr0071797;FBtr0336637;FBtr0300693;FBtr0336638	27.5124	26.5502	27.3498	27.9179	26.4754	27.2166	26.8593	24.2855	0.500905	0.503242	1.12337	FALSE	CG11073
FBtr0071800	25.7197	26.1689	25.4262	21.8798	26.6415	26.3962	26.4569	27.1717	0.483752	0.567036	-1.86794	FALSE	CG2921
FBtr0303766;FBtr0071802	29.4031	29.6864	29.7047	29.8187	30.0928	30.2062	30.3586	30.2342	0.0380898	0.854125	-0.569727	FALSE	CG11474
FBtr0345871;FBtr0071804	21.8798	21.8798	21.8798	21.8798	21.8798	21.8798	21.8798	21.8798	0.500905	0	0	FALSE	CG13501
FBtr0308774;FBtr0071812;FBtr0071811	21.8798	21.8798	21.8798	24.4838	21.8798	21.8798	21.8798	21.8798	0.500905	0.353553	0.650994	FALSE	CG5819
FBtr0342985;FBtr0342986;FBtr0071815;FBtr0071814;FBtr0071813;FBtr0071816	28.1656	27.8738	28.1461	27.4642	27.7021	27.8194	27.3577	27.6736	0.500905	0.472969	0.274258	FALSE	Gp150
FBtr0342988;FBtr0071820	21.8798	21.8798	21.8798	21.8798	21.8798	21.8798	21.8798	21.8798	0.500905	0	0	FALSE	Rtf1
FBtr0071821	21.8798	21.8798	21.8798	21.8798	21.8798	24.0658	21.8798	21.8798	0.500905	0.353553	-0.546514	FALSE	wrapper
FBtr0342989;FBtr0071822	30.4503	30.3659	30.0585	29.9534	30.1849	29.8523	29.964	29.8894	0.500905	0.526156	0.234379	FALSE	CG13506
FBtr0301243;FBtr0071827	21.8798	21.8798	21.8798	21.8798	21.8798	21.8798	21.8798	21.8798	0.500905	0	0	FALSE	Mes4
FBtr0344880;FBtr0339535;FBtr0071828	29.9765	29.4192	29.6494	29.91	29.2897	29.851	29.4258	29.1847	0.500905	0.500011	0.300971	FALSE	qkr58E-2
FBtr0071832	30.6032	30.7142	30.8872	30.7665	30.7049	30.5884	30.5509	30.614	0.474011	0.573442	0.128239	FALSE	CG4752
FBtr0071833	23.4459	24.0043	25.2628	21.8798	23.7479	21.8523	25.4827	23.6777	0.979939	0.0157016	-0.0419638	FALSE	CG4554
FBtr0071834	21.8798	21.8798	21.8798	21.8798	21.8798	21.8798	21.8798	21.8798	0.500905	0	0	FALSE	CG4610
FBtr0071835	25.8847	26.2601	26.3021	25.483	26.169	27.0053	26.4004	26.3202	0.488648	0.564497	-0.491253	FALSE	CG6018
FBtr0071838;FBtr0331942;FBtr0112820	21.8798	21.8798	21.8798	21.8798	21.8798	21.8798	21.8798	21.8798	0.500905	0	0	FALSE	px
FBtr0071842	30.7015	30.5685	30.6244	30.8586	30.6105	30.4709	30.3889	30.4859	0.296811	0.675681	0.199186	FALSE	mRpS29
FBtr0071843;FBtr0346637;FBtr0339537	28.9146	28.4464	28.819	28.607	28.4009	28.8115	28.4138	28.6542	0.558822	0.314609	0.126641	FALSE	qkr58E-1
FBtr0339539;FBtr0071845	30.3147	30.0487	29.5657	30.1169	29.3575	29.9592	29.4752	29.6069	0.438558	0.592365	0.411802	FALSE	babos
FBtr0071848	29.8	29.459	29.8437	29.4318	29.3145	29.2782	29.0542	29.1731	0.167728	0.763466	0.428611	FALSE	T3dh
FBtr0342984;FBtr0071852;FBtr0071851;FBtr0071850;FBtr0071849	28.6643	28.3745	28.5964	28.5376	28.0021	28.3517	28.6011	28.5889	0.500905	0.361382	0.15727	FALSE	wdp
FBtr0343000;FBtr0343001;FBtr0071854	21.8798	21.8798	21.8798	21.8798	21.8798	21.8798	21.8798	21.8798	0.500905	0	0	FALSE	CG4269
FBtr0343002;FBtr0071855	33.9221	34.1421	33.6881	33.8954	34.0136	33.9421	34.0666	33.6696	0.960591	0.0328857	-0.0110366	FALSE	RpS16
FBtr0308602;FBtr0071856	21.8798	23.6624	24.0094	21.8798	21.8798	23.8835	24.6498	21.8798	0.886094	0.0902391	-0.21539	FALSE	Vps20
FBtr0071860	30.1285	29.7254	29.6564	30.1458	29.5289	29.6417	29.5662	29.4604	0.270572	0.692933	0.364743	FALSE	bonsai
FBtr0345496;FBtr0071861	21.8798	21.8798	21.8798	21.8798	21.8798	21.8798	21.8798	21.8798	0.500905	0	0	FALSE	nsr
FBtr0345498;FBtr0309799;FBtr0071862	21.8798	21.8798	21.8798	21.8798	21.8798	21.8798	21.8798	21.8798	0.500905	0	0	FALSE	CG13510
FBtr0071865;FBtr0309802	21.8798	21.8798	21.8798	21.8798	21.8798	21.8798	21.8798	21.8798	0.500905	0	0	FALSE	CG4250
FBtr0071883	36.9487	36.833	36.9347	37.0412	36.7649	36.8319	36.844	36.7917	0.251385	0.707688	0.131326	FALSE	blw
FBtr0071897	33.2643	33.2402	33.3463	32.7613	33.1845	33.0025	32.9836	33.0303	0.630761	0.268238	0.102795	FALSE	RpL23
FBtr0071902;FBtr0332909	29.4509	28.9349	28.9212	29.1188	28.4401	28.5897	29.0695	28.9624	0.500905	0.545842	0.341014	FALSE	asrij
FBtr0071903	24.1595	24.9589	23.2005	24.1013	23.0484	21.8798	24.7224	24.8528	0.699504	0.222759	0.479238	FALSE	MED23
FBtr0071904	21.8798	21.8798	21.8798	21.8798	21.8798	21.8798	21.8798	21.8798	0.500905	0	0	FALSE	CG3700
FBtr0071905	28.2699	27.5683	28.3946	27.8673	28.7818	27.7024	27.9941	28.4019	0.676486	0.238116	-0.195012	FALSE	Gmer
FBtr0071906;FBtr0332910;FBtr0304924	29.5006	29.4998	29.5948	29.6787	29.5811	29.5269	29.6888	29.6264	0.65944	0.249688	-0.0373256	FALSE	CG3499
FBtr0071907	28.7966	29.4089	28.8005	29.3091	29.4451	29.0403	29.2761	29.3379	0.500905	0.372833	-0.196062	FALSE	CG3501
FBtr0071909;FBtr0305132	28.5219	28.7733	28.785	29.0922	29.0652	28.7477	28.8952	29.0092	0.500905	0.353657	-0.136204	FALSE	inaD
FBtr0343182;FBtr0071910	21.8798	24.5357	24.4304	21.8798	21.8798	21.8798	21.8798	21.8798	0.500905	0.539914	1.30166	FALSE	CG13531
FBtr0071913;FBtr0309858;FBtr0071911;FBtr0071914	21.8798	21.8798	21.8798	21.8798	21.8798	21.8798	21.8798	21.8798	0.500905	0	0	FALSE	CycB
FBtr0343013;FBtr0071922	21.8798	21.8798	21.8798	21.8798	21.8798	21.8798	21.8798	21.8798	0.500905	0	0	FALSE	robo
FBtr0343014;FBtr0071924;FBtr0330249	21.8798	21.8798	21.8798	21.8798	21.8798	21.8798	21.8798	21.8798	0.500905	0	0	FALSE	Ppa
FBtr0071927	25.2621	21.8798	21.8798	22.588	21.8798	21.8798	21.8798	22.7827	0.521878	0.339531	0.796896	FALSE	CG30196
FBtr0071928	24.4557	26.3586	25.9951	22.1491	25.1429	26.1285	23.8007	25.5231	0.81405	0.143415	-0.409115	FALSE	Cyp6d2
FBtr0345504;FBtr0071933	33.2	32.8791	32.9886	33.417	32.7145	32.8783	33.0512	32.7784	0.474011	0.573189	0.265545	FALSE	CG2852
FBtr0345505;FBtr0071934	27.9931	28.5499	28.6303	27.8526	28.3738	28.2691	28.3222	28.4951	0.731715	0.201152	-0.108583	FALSE	Ugt58Fa
FBtr0071935	33.2027	32.6967	33.0046	33.0282	32.6528	33.0664	33.0264	33.0375	0.873575	0.0984387	0.0372682	FALSE	RpS24
FBtr0071937	25.2701	21.8798	25.7144	23.066	25.0029	21.8798	21.8798	24.1438	0.686129	0.231365	0.756032	FALSE	Cdk9
FBtr0071943;FBtr0071942	26.8289	27.0323	26.1881	26.5945	26.3634	26.8347	26.2805	26.6576	0.715375	0.212282	0.126912	FALSE	nahoda
FBtr0302895;FBtr0071951	21.8798	21.8798	21.8798	21.8798	21.8798	21.8798	21.8798	21.8798	0.500905	0	0	FALSE	CG9849
FBtr0345653;FBtr0100130;FBtr0071953	21.8798	21.8798	21.8798	21.8798	21.8798	21.8798	21.8798	21.8798	0.500905	0	0	FALSE	twi
FBtr0343192;FBtr0343191;FBtr0343190;FBtr0071961;FBtr0343189;FBtr0343188;FBtr0071960;FBtr0071959;FBtr0071958	30.361	30.9792	30.5251	30.3995	30.7312	30.6235	30.9736	30.6853	0.500905	0.400255	-0.187193	FALSE	l(2)k09913
FBtr0310344;FBtr0071963	21.8798	21.8798	21.8798	21.8798	23.3569	25.8962	26.3821	27.0439	0.0647982	0.829597	-3.78999	FALSE	CG3085
FBtr0071968	21.8798	21.8798	21.8798	21.8798	27.6022	24.641	27.0028	26.9216	0.0134015	0.884995	-4.66212	FALSE	Klp59D
FBtr0071982	31.8873	31.6974	31.5738	31.6552	31.5914	31.282	31.0426	31.2117	0.205381	0.740943	0.421453	FALSE	Fib
FBtr0071984	21.8798	22.6371	22.815	21.8798	21.8798	23.7035	24.7775	23.5644	0.500905	0.557778	-1.17836	FALSE	CG9890
FBtr0336732;FBtr0071985	27.3281	27.1005	27.4058	27.5995	27.2639	23.7892	26.8503	26.7608	0.500905	0.483404	1.19241	FALSE	l(2)06496
FBtr0071988	26.0563	23.4219	23.5562	25.7155	24.5716	26.2244	25.3633	26.1085	0.500905	0.385316	-0.879459	FALSE	CG9896
FBtr0071989	21.8798	21.8798	21.8798	21.8798	21.8798	21.8798	21.8798	21.8798	0.500905	0	0	FALSE	CG9897
FBtr0071990	21.8798	21.8798	21.8798	21.8798	21.8798	21.8798	21.8798	21.8798	0.500905	0	0	FALSE	CG32833
FBtr0303464;FBtr0071994	30.9309	30.6701	30.6468	31.1129	30.2957	30.7915	30.9263	31.0523	0.818969	0.13943	0.0737243	FALSE	CG3800
FBtr0303465;FBtr0071995	21.8798	21.8798	21.8798	21.8798	27.2145	27.2159	27.6014	27.389	3.94159e-07	0.934628	-5.47543	TRUE	CG3788
FBtr0071996	21.8798	26.3948	24.5259	25.6159	25.4369	23.0765	24.8215	22.8464	0.765167	0.178243	0.558766	FALSE	Nup214
FBtr0301853;FBtr0072006	21.8798	21.8798	21.8798	21.8798	25.5546	25.8597	25.2797	25.1846	3.21511e-05	0.930433	-3.58989	TRUE	CG9875
FBtr0072011	21.8798	22.4648	21.8798	21.8798	23.2717	26.3788	24.6548	22.5639	0.294961	0.676669	-2.19124	FALSE	yellow-d
FBtr0072012	27.9116	27.5906	27.6155	28.3529	27.9631	29.0984	28.3593	27.8869	0.500905	0.463048	-0.459292	FALSE	yellow-d2
FBtr0302315;FBtr0072015;FBtr0072013;FBtr0072014	24.1822	27.3941	23.1104	24.7479	27.3427	27.2892	28.0924	28.3671	0.223494	0.730979	-2.91421	FALSE	eIF2B-delta
FBtr0343207;FBtr0072025	21.8798	21.8798	21.8798	21.8798	21.8798	21.8798	21.8798	21.8798	0.500905	0	0	FALSE	CG9812
FBtr0072027	23.9171	23.12	24.9827	25.6138	24.8193	23.8711	24.6533	25.141	0.831554	0.130534	-0.21273	FALSE	CG3520
FBtr0112940;FBtr0072028;FBtr0072029	24.3374	24.0039	21.8798	21.8798	21.8798	22.3108	21.8798	24.4836	0.790599	0.159672	0.386727	FALSE	CG3530
FBtr0072031;FBtr0072030	33.382	32.4551	33.6377	33.7031	32.55	33.0307	33.4353	33.4696	0.762717	0.180379	0.173087	FALSE	CG30415
FBtr0072034;FBtr0072033	32.0537	31.9471	31.715	32.6898	31.5932	31.3918	31.0979	31.3428	0.202455	0.743728	0.744998	FALSE	CG13551
FBtr0072036	26.429	27.2435	27.3122	26.1563	26.5384	26.6327	26.5773	26.6418	0.676488	0.238066	0.187689	FALSE	Golgin245
FBtr0072037	21.8798	22.7717	24.9675	21.8798	25.0953	22.6408	23.9825	24.7581	0.500905	0.456025	-1.2445	FALSE	vir
FBtr0329860;FBtr0072038	24.0011	25.174	24.7395	22.6981	23.7901	23.567	25.1771	23.8921	0.967066	0.0272452	0.046574	FALSE	CG3500
FBtr0072040	21.8798	21.8798	21.8798	21.8798	21.8798	21.8798	21.8798	21.8798	0.500905	0	0	FALSE	CG30413
FBtr0072043;FBtr0072044;FBtr0343206	21.8798	21.8798	21.8798	21.8798	23.8381	25.1578	22.6933	23.1368	0.175272	0.758556	-1.82673	FALSE	CG30412
FBtr0072049	21.8798	21.8798	21.8798	21.8798	27.1693	27.2021	27.0826	26.8309	3.68661e-07	0.934681	-5.19145	TRUE	RpL22-like
FBtr0072058	21.8798	21.8798	23.8212	21.8798	21.8798	21.8798	21.8798	21.8798	0.500905	0.353553	0.485356	FALSE	mi
FBtr0072060	29.2616	29.1637	29.1141	28.8162	29.3796	29.573	29.5228	28.7749	0.500905	0.376917	-0.223633	FALSE	CG30185
FBtr0343265;FBtr0072061	33.666	33.159	33.6465	33.4599	33.3025	33.2792	33.4955	33.3783	0.530312	0.333645	0.118961	FALSE	levy
FBtr0072062	24.9807	24.9946	24.8667	24.8414	21.8798	23.9814	25.1301	21.8798	0.40799	0.610036	1.70311	FALSE	Dcp-1
FBtr0072064	21.8721	23.7104	21.8798	24.3496	21.8798	24.0173	23.0524	21.8798	0.85472	0.113704	0.245674	FALSE	Pi3K59F
FBtr0072070;FBtr0072069;FBtr0072067;FBtr0072066;FBtr0332926;FBtr0072068	21.8798	21.8798	21.8798	21.8798	21.8798	21.8798	21.8798	21.8798	0.500905	0	0	FALSE	apt
FBtr0340029;FBtr0072072;FBtr0072073;FBtr0340030;FBtr0340031	21.8798	22.8877	24.2002	23.7458	21.8798	21.8798	21.8798	21.8798	0.299876	0.673306	1.29858	FALSE	retn
FBtr0072084	30.099	29.7726	30.0076	29.8151	29.594	29.5852	29.3438	29.4373	0.0819658	0.817365	0.433495	FALSE	mRpL43
FBtr0072085	21.8798	21.8798	21.8798	21.8798	21.8798	21.8798	21.8798	24.3723	0.500905	0.353553	-0.623131	FALSE	l(2)dtl
FBtr0343268;FBtr0113114;FBtr0113113;FBtr0072087	26.7928	26.8089	26.8459	26.737	26.2237	26.7623	26.5346	26.8416	0.500905	0.480144	0.205605	FALSE	Sesn
FBtr0345535;FBtr0072091	26.2381	27.1068	26.9207	27.1922	27.0927	27.7297	28.4305	28.133	0.269079	0.694845	-0.982025	FALSE	CG5532
FBtr0072095	21.8798	24.0342	22.7252	21.8798	24.6264	21.8798	22.9071	23.1506	0.663435	0.247254	-0.511214	FALSE	l(2)not
FBtr0072098;FBtr0072096;FBtr0072097	21.8798	21.8798	21.8798	21.8798	21.8798	21.8798	21.8798	21.8798	0.500905	0	0	FALSE	CG4091
FBtr0336685;FBtr0072100	33.3861	33.0218	33.1645	33.084	32.8704	33.1932	33.0941	32.5535	0.500905	0.47723	0.236332	FALSE	l(2)efl
FBtr0072104;FBtr0072103;FBtr0072102;FBtr0072105;FBtr0306384;FBtr0336929	27.7196	28.3626	28.4086	28.1899	28.1909	28.3732	28.6321	28.9802	0.500905	0.513273	-0.373945	FALSE	CG4019
FBtr0343267;FBtr0072111	24.3309	26.9083	26.4373	23.6251	26.7036	23.3565	21.8798	26.2197	0.721231	0.208501	0.785467	FALSE	Rrp4
FBtr0072112;FBtr0072113	22.947	21.8798	21.8798	23.5982	21.8798	21.8798	21.8798	24.3192	0.945722	0.0444706	0.0865607	FALSE	pita
FBtr0113112;FBtr0072114	30.4608	30.4351	30.3098	30.3288	30.5605	30.4454	30.0038	30.1917	0.680497	0.235208	0.0832765	FALSE	wmd
FBtr0072120	21.8798	21.8798	21.8798	21.8798	21.8798	21.8798	21.8798	21.8798	0.500905	0	0	FALSE	RabX1
FBtr0072121	23.4365	21.8798	24.5165	24.4674	21.8798	21.8798	21.8798	21.8798	0.263939	0.697976	1.69526	FALSE	CG3906
FBtr0072124	21.8798	21.8798	21.8798	21.8798	21.8798	21.8798	21.8798	21.8798	0.500905	0	0	FALSE	CG5543
FBtr0072126;FBtr0343273	30.8413	31.0479	31.0809	30.7325	31.1526	31.215	31.2715	31.2079	0.190596	0.750596	-0.286092	FALSE	CG5554
FBtr0343274;FBtr0072127	25.0731	24.4574	22.8467	24.6021	24.8727	25.8493	22.9345	24.6908	0.782737	0.165588	-0.341979	FALSE	gbb
FBtr0072128	27.7065	27.9513	27.6145	27.7844	27.7838	27.8876	27.8901	27.5477	0.943001	0.0464844	-0.0131085	FALSE	CG5569
FBtr0072130;FBtr0330600	26.9665	27.5982	27.4898	27.2701	27.2663	27.8689	28.3989	28.1787	0.407149	0.610826	-0.597052	FALSE	TM4SF
FBtr0072131	31.8499	31.343	31.0779	32.0559	32.0115	31.2668	30.6615	31.0535	0.537657	0.329177	0.333367	FALSE	CG5597
FBtr0072132	21.8798	21.8798	21.8798	21.8798	21.8798	21.8798	21.8798	21.8798	0.500905	0	0	FALSE	DNA-ligI
FBtr0343298;FBtr0072134	21.8798	21.8798	21.8798	21.8798	21.8798	21.8798	21.8798	21.8798	0.500905	0	0	FALSE	Lpt
FBtr0072140	21.8798	21.8798	21.8798	21.8798	21.8798	21.8798	21.8798	21.8798	0.500905	0	0	FALSE	CG2812
FBtr0072141	32.5018	32.5502	32.7509	32.5596	32.4869	32.6464	32.6685	32.4398	0.813314	0.143871	0.0301888	FALSE	Tal
FBtr0343279;FBtr0072144;FBtr0072142;FBtr0301411;FBtr0072143	29.375	29.7356	29.0232	29.2068	29.6499	29.339	29.4385	29.3745	0.652402	0.25416	-0.11535	FALSE	Galphas
FBtr0331980;FBtr0072145	29.7781	29.7241	29.7177	29.956	29.7644	29.9341	29.588	29.6485	0.68006	0.23587	0.0602123	FALSE	CG2970
FBtr0072147	21.8798	23.8666	26.3301	21.8798	21.8798	24.5708	24.7041	23.7812	0.904177	0.0751289	-0.244901	FALSE	thoc5
FBtr0072150	26.7754	26.8197	26.984	26.5938	26.4908	26.6355	26.3843	26.7227	0.401461	0.614917	0.234907	FALSE	Fmo-1
FBtr0072151	30.5091	31.0628	30.7843	30.3038	30.8768	30.8356	30.4778	30.2527	0.88228	0.0926553	0.0542711	FALSE	Alas
FBtr0072152	21.8798	21.8798	21.8798	21.8798	21.8798	23.6845	23.2235	24.1565	0.26068	0.700145	-1.35629	FALSE	or
FBtr0072156	21.8798	21.8798	21.8798	21.8798	21.8798	21.8798	21.8798	21.8798	0.500905	0	0	FALSE	mr
FBtr0343282;FBtr0072158;FBtr0072157	21.8798	21.8798	21.8798	21.8798	21.8798	21.8798	21.8798	21.8798	0.500905	0	0	FALSE	Sox14
FBtr0072161	21.8798	21.8798	21.8798	21.8798	26.2129	26.2419	26.9213	26.7438	1.91442e-05	0.931306	-4.65019	TRUE	CG3121
FBtr0072163	32.62	32.2482	32.4243	32.8175	31.9995	32.2354	32.0747	32.1144	0.205381	0.741284	0.421494	FALSE	Adk2
FBtr0343341;FBtr0343340;FBtr0072164	33.4039	33.1998	32.8761	33.6418	32.6477	32.643	31.9199	32.4914	0.146221	0.77412	0.854875	FALSE	PebIII
FBtr0072165	25.2618	23.902	25.5462	25.524	21.8798	23.139	26.2744	24.0196	0.500905	0.418115	1.23032	FALSE	CG3163
FBtr0345949;FBtr0072167;FBtr0072166	23.3388	21.8798	21.8798	21.8798	21.8798	21.8798	21.8798	21.8798	0.500905	0.353553	0.364768	FALSE	MAN1
FBtr0072168	21.8798	21.8798	21.8798	21.8798	21.8798	21.8798	23.6908	24.4839	0.500905	0.528806	-1.10377	FALSE	IntS1
FBtr0072173;FBtr0072172	33.1677	33.0783	32.7364	33.1447	32.8045	32.6494	32.7243	32.4738	0.234619	0.725373	0.368798	FALSE	eIF-5A
FBtr0072176;FBtr0072175;FBtr0072174	32.7272	32.5955	32.8413	32.8141	32.2736	32.5104	32.5974	32.5085	0.224198	0.73062	0.272063	FALSE	RpL12
FBtr0072177;FBtr0343335;FBtr0343334	27.3597	26.9127	27.148	27.4838	27.4531	26.9771	27.6981	27.2283	0.716414	0.211699	-0.113083	FALSE	Rap2l
FBtr0072179;FBtr0343336;FBtr0343337;FBtr0302165	26.3996	23.4363	26.7477	26.5192	24.1651	22.7592	22.9754	24.1516	0.29018	0.681551	2.26286	FALSE	CG3209
FBtr0072185	22.8609	22.8188	22.2543	24.2911	23.7535	23.5945	23.3295	23.9348	0.500905	0.443229	-0.596774	FALSE	RpL39
FBtr0072187	28.8594	28.6636	28.8697	28.926	28.5137	28.6607	28.9458	28.9784	0.785269	0.163837	0.0550068	FALSE	gammaSnap1
FBtr0072188	34.5117	34.5393	34.1171	34.5096	34.3985	34.2824	34.2439	34.1207	0.500905	0.454341	0.158028	FALSE	tsr
FBtr0343345;FBtr0072189;FBtr0072190	25.8291	21.8798	21.8798	21.8798	23.5396	21.8798	21.8798	26.4226	0.81097	0.145849	-0.563326	FALSE	Not11
FBtr0072191;FBtr0072192	25.8797	21.8798	21.8798	25.981	23.5272	25.1464	23.8849	25.6851	0.744484	0.192054	-0.6558	FALSE	Chi
FBtr0345934;FBtr0072193	24.8553	23.6849	24.8357	22.7745	25.2067	21.8798	25.0769	22.928	0.866557	0.104573	0.264779	FALSE	CG30172
FBtr0343346;FBtr0072194	26.433	25.8227	26.623	26.3242	26.3645	25.974	26.6204	26.5763	0.819329	0.138995	-0.0831029	FALSE	HSPC300
FBtr0072201;FBtr0343288	27.4004	26.318	26.9952	27.5494	26.5904	26.936	27.2728	26.9348	0.788444	0.16118	0.132235	FALSE	CG3860
FBtr0072203;FBtr0072202	28.0572	27.408	27.8875	28.0013	26.6119	27.381	27.1855	27.5965	0.30803	0.668199	0.644785	FALSE	Phm
FBtr0072207	26.1091	26.9148	27.1939	27.3329	27.5339	27.4262	27.3128	26.7576	0.500905	0.395587	-0.36993	FALSE	CG16787
FBtr0072208	25.7166	23.8568	26.101	25.9798	21.8798	25.68	25.1654	25.6012	0.599849	0.288228	0.831935	FALSE	CG3803
FBtr0072209	23.4819	21.8798	22.6004	23.1068	21.8798	21.8798	23.3933	23.1155	0.814931	0.142527	0.200109	FALSE	CG13565
FBtr0343280;FBtr0072210	21.8798	21.8798	21.8798	21.8798	21.8798	21.8798	21.8798	21.8798	0.500905	0	0	FALSE	CG3735
FBtr0072218;FBtr0072217;FBtr0072216;FBtr0072214;FBtr0072213;FBtr0072212;FBtr0072211	21.8798	21.8798	21.8798	21.8798	23.8521	23.4106	22.2938	24.5219	0.161626	0.766595	-1.63983	FALSE	Ca-P60A
FBtr0072215	30.9321	31.9404	31.8379	31.1845	32.0694	31.5628	31.9883	32.0685	0.500905	0.519153	-0.448564	FALSE	Ca-P60A
FBtr0305990;FBtr0305989;FBtr0072219	31.5599	32.0097	31.7064	31.5008	31.7274	31.6391	31.5815	31.4163	0.603616	0.285821	0.103143	FALSE	Nap1
FBtr0072220	21.8798	21.8798	21.8798	21.8798	24.2764	21.8798	24.6545	21.8798	0.500905	0.538147	-1.29283	FALSE	CG5339
FBtr0343302;FBtr0072221	21.8798	21.8798	21.8798	21.8798	21.8798	21.8798	23.2303	23.9766	0.500905	0.523941	-0.861827	FALSE	Upf3
FBtr0301648;FBtr0072223	27.1916	27.1491	27.7257	28.0189	27.3729	26.9567	26.9633	24.2571	0.500905	0.492556	1.13382	FALSE	DCP1
FBtr0343290;FBtr0072225	30.2768	29.8773	30.377	29.9786	29.8263	29.837	29.4249	29.7839	0.281304	0.687415	0.409377	FALSE	CG4882
FBtr0072226	33.2522	33.1814	33.3555	33.2615	33.3687	33.5601	33.5326	33.4065	0.166476	0.764146	-0.204335	FALSE	Thiolase
FBtr0343277;FBtr0343276;FBtr0343275;FBtr0072227	24.0483	22.6728	23.7164	21.8798	24.7634	23.203	24.1896	24.7092	0.488848	0.564288	-1.13695	FALSE	CG4585
FBtr0072233	21.8798	21.8798	21.8798	21.8798	21.8798	21.8798	21.8798	21.8798	0.500905	0	0	FALSE	Pym
FBtr0343278;FBtr0072234	24.6386	24.852	23.8609	23.2728	22.6075	22.8837	23.2902	24.2121	0.500905	0.553504	0.907723	FALSE	ytr
FBtr0072235	28.4575	28.6925	28.8514	28.6777	28.094	28.472	28.3404	28.0046	0.193057	0.749032	0.442031	FALSE	eIF6
FBtr0072236	26.2986	24.0414	26.0599	23.1622	24.3789	23.4629	23.1185	21.8798	0.500905	0.557259	1.6805	FALSE	Snap29
FBtr0072237	21.8798	21.8798	21.8798	21.8798	21.8798	21.8798	21.8798	21.8798	0.500905	0	0	FALSE	shu
FBtr0072241;FBtr0343270	22.7446	21.8798	21.8798	23.4019	21.8798	26.4332	24.1143	23.1123	0.500905	0.454935	-1.40836	FALSE	Nxt1
FBtr0072242	21.8798	21.8798	24.8663	25.62	24.5477	21.8798	25.7981	26.4299	0.604881	0.284927	-1.1024	FALSE	Ssrp
FBtr0072249;FBtr0307174	21.8798	23.4124	24.4955	24.5044	23.5639	21.8798	21.8798	23.5746	0.500905	0.376135	0.84851	FALSE	snama
FBtr0343339;FBtr0072250	21.8798	21.8798	21.8798	21.8798	21.8798	21.8798	21.8798	21.8798	0.500905	0	0	FALSE	enok
FBtr0343432;FBtr0072253	25.0158	22.8339	23.8933	21.8798	23.8051	21.8798	21.8798	21.8798	0.500905	0.427515	1.0446	FALSE	Zfrp8
FBtr0072255;FBtr0072254	29.9649	30.0465	29.8046	29.9229	29.9272	29.8233	29.918	29.7564	0.500905	0.414828	0.0785162	FALSE	Dat
FBtr0072256	24.7691	23.8332	25.3229	26.4543	27.4749	27.827	27.0851	26.5312	0.165497	0.764688	-2.13466	FALSE	spag
FBtr0343435;FBtr0343434;FBtr0072257	21.8798	21.8798	21.8798	21.8798	21.8798	21.8798	21.8798	21.8798	0.500905	0	0	FALSE	CG3328
FBtr0300861;FBtr0300227;FBtr0100213;FBtr0072258;FBtr0304599	29.7568	30.5378	30.4822	29.9448	30.1858	29.7753	29.9151	30.2693	0.680341	0.235428	0.144001	FALSE	Nop60B
FBtr0072261	28.8012	28.1875	28.5125	28.475	28.2517	28.3792	28.0203	27.9419	0.397988	0.616177	0.345805	FALSE	cN-IIIB
FBtr0072262	25.8449	26.1886	26.4658	25.4946	27.1157	25.3947	27.7027	27.401	0.500905	0.51626	-0.905028	FALSE	CG3356
FBtr0072265;FBtr0343442;FBtr0072266;FBtr0308245	26.3892	24.2943	23.4955	26.8132	26.2266	24.7829	23.4952	26.3897	0.98742	0.00887857	0.0244596	FALSE	CG3376
FBtr0072268;FBtr0072269	25.7064	26.795	25.9621	23.1635	27.4758	25.3288	27.2282	27.5131	0.500905	0.505089	-1.47973	FALSE	CG3394
FBtr0072270	25.2527	21.8798	24.4159	23.2851	23.7765	21.8798	23.5993	25.2334	0.96069	0.032777	0.086114	FALSE	betaTub60D
FBtr0290089;FBtr0343314;FBtr0072271	21.8798	21.8798	21.8798	21.8798	21.8798	21.8798	21.8798	21.8798	0.500905	0	0	FALSE	bs
FBtr0072277	30.1999	29.7704	29.8867	30.2201	29.4411	29.9174	30.0119	29.7336	0.500905	0.474289	0.243275	FALSE	mRpS17
FBtr0100398;FBtr0072280	26.2036	27.1977	26.2167	26.622	27.004	26.5226	27.0737	26.8916	0.500905	0.407589	-0.312967	FALSE	CG4065
FBtr0343438;FBtr0072282;FBtr0072281	21.8798	24.0851	21.8798	21.8798	21.8798	21.8798	21.8798	21.8798	0.500905	0.353553	0.551339	FALSE	tamo
FBtr0072285	21.8798	21.8798	21.8798	21.8798	21.8798	21.8798	21.8798	21.8798	0.500905	0	0	FALSE	CG4049
FBtr0072287	25.8526	26.6827	26.7915	24.1176	24.79	26.4825	26.7338	26.4817	0.833084	0.129283	-0.26086	FALSE	gek
FBtr0332921;FBtr0072290;FBtr0330237	32.1118	32.2322	31.7464	31.8342	32.0509	32.1357	31.9348	31.7405	0.949087	0.0418966	0.0156787	FALSE	Rpn8
FBtr0072293	21.8798	21.8798	21.8798	21.8798	26.0667	25.7616	26.2002	26.2407	2.6546e-06	0.933537	-4.18755	TRUE	CG3483
FBtr0072296;FBtr0072295	21.8798	21.8798	21.8798	21.8798	21.8798	23.1244	23.0094	21.8798	0.500905	0.539219	-0.593545	FALSE	CG3494
FBtr0072297	21.8798	21.8798	21.8798	21.8798	24.2929	21.8798	23.1358	21.8798	0.500905	0.507463	-0.917272	FALSE	CG16837
FBtr0072307	27.4143	27.2598	27.9357	27.5754	27.0885	27.0577	27.6021	27.4247	0.500905	0.435778	0.253066	FALSE	CG11414
FBtr0072308	25.7604	23.2417	22.6386	23.4399	21.8798	21.8798	21.8798	21.8798	0.261561	0.699607	1.89038	FALSE	uri
FBtr0343484;FBtr0072309	21.8798	21.8798	21.8798	24.663	23.8637	24.5195	24.0764	23.9682	0.394237	0.617877	-1.53135	FALSE	CG3511
FBtr0343486;FBtr0301502;FBtr0072312	21.8798	21.8798	21.8798	21.8798	21.8798	25.1587	24.7511	22.8743	0.35431	0.640642	-1.78618	FALSE	pio
FBtr0072315	24.1117	23.7193	24.5551	23.59	21.8798	21.8798	21.8798	21.8798	0.00346305	0.907077	2.11427	TRUE	CG3548
FBtr0072317	21.8798	21.8798	21.8798	21.8798	21.8798	21.8798	21.8798	21.8798	0.500905	0	0	FALSE	CG3570
FBtr0343487;FBtr0072320	21.8798	21.8798	21.8798	21.8798	21.8798	21.8798	21.8798	21.8798	0.500905	0	0	FALSE	CG3608
FBtr0072321	21.8798	21.8798	21.8798	23.9934	21.8798	21.8798	21.8798	21.8798	0.500905	0.353553	0.52841	FALSE	Cyp9c1
FBtr0072322	21.8798	21.8798	21.8798	21.8798	21.8798	21.8798	21.8798	21.8798	0.500905	0	0	FALSE	CG3640
FBtr0072323	29.3321	29.0959	29.1256	29.6303	28.9103	29.365	29.1509	29.1785	0.529628	0.334282	0.144835	FALSE	CG3663
FBtr0301036;FBtr0072326;FBtr0072325;FBtr0072324	32.9156	32.5052	32.1925	32.6482	32.2303	32.1741	31.933	32.0968	0.255998	0.702677	0.45684	FALSE	NDUFA8
FBtr0306655;FBtr0072328;FBtr0072327	21.8798	21.8798	21.8798	21.8798	26.6579	26.619	26.6547	26.6703	8.10689e-11	0.935399	-4.77071	TRUE	Pof
FBtr0072332	21.8798	21.8798	21.8798	21.8798	21.8798	21.8798	23.7484	21.8798	0.500905	0.353553	-0.467161	FALSE	CG4806
FBtr0343491;FBtr0072334	21.8798	21.8798	21.8798	21.8798	24.6366	21.8798	21.8798	23.7892	0.500905	0.528566	-1.16656	FALSE	Cpr60D
FBtr0072335	21.8798	21.8798	21.8798	21.8798	21.8798	21.8798	21.8798	21.8798	0.500905	0	0	FALSE	CG4781
FBtr0072340;FBtr0072339	33.4936	33.687	33.918	34.2699	33.8068	33.8308	34.2227	34.1883	0.571975	0.30542	-0.170058	FALSE	CG4692
FBtr0343489;FBtr0072342	21.8798	21.8798	21.8798	21.8798	21.8798	21.8798	21.8798	21.8798	0.500905	0	0	FALSE	Fcp1
FBtr0072343	21.8798	24.0278	22.6864	21.8798	21.8798	21.8798	24.766	21.8798	0.989004	0.00740977	0.0171095	FALSE	Nurf-38
FBtr0300490;FBtr0072344	22.5136	22.9115	25.1746	24.3439	23.3396	21.8798	21.8798	23.8306	0.500905	0.427203	1.00348	FALSE	CG4622
FBtr0306137;FBtr0072346	29.0569	28.966	28.5643	28.5716	28.9652	28.6143	28.6433	28.6787	0.792016	0.158647	0.0643505	FALSE	CG4612
FBtr0072349;FBtr0072348;FBtr0072347	30.1155	29.8855	30.1185	30.0657	30.0491	29.8524	30.1205	30.1737	0.984443	0.0111649	-0.002609	FALSE	Letm1
FBtr0343481;FBtr0072350	21.8798	21.8798	21.8798	21.8798	25.0382	24.9232	24.224	24.3494	0.000660359	0.920482	-2.75394	TRUE	Prosalpha4T2
FBtr0072351	21.8798	21.8798	21.8798	21.8798	24.5968	23.2215	24.4977	25.1449	0.025401	0.868195	-2.48544	FALSE	Ssl
FBtr0072355	24.0605	21.8798	21.8798	21.8798	21.8798	21.8798	21.8798	21.8798	0.500905	0.353553	0.545174	FALSE	CG4563
FBtr0290019;FBtr0072366;FBtr0072364;FBtr0072363;FBtr0100470;FBtr0332925	29.2176	28.9705	28.6131	28.5287	27.8782	28.8387	28.1649	28.716	0.500905	0.501917	0.433027	FALSE	slik
FBtr0072369;FBtr0343495;FBtr0343494	24.0372	21.8798	21.8798	21.8798	21.8798	21.8798	22.6531	21.8798	0.698222	0.223923	0.346028	FALSE	CG30421
FBtr0072370	23.268	24.0794	24.3601	23.6431	23.1406	21.8798	24.8131	21.8798	0.500905	0.421516	0.909312	FALSE	spz6
FBtr0072375	21.8798	24.4736	23.4824	21.8798	21.8798	23.8449	23.0102	24.4239	0.788921	0.160758	-0.360791	FALSE	CG3589
FBtr0072392	21.8798	25.6063	21.8798	21.8798	21.8798	21.8798	21.8798	21.8798	0.500905	0.353553	0.931629	FALSE	CG3760
FBtr0343504;FBtr0072395	28.2591	28.4378	28.4164	28.4006	28.2006	28.1881	28.2892	27.7603	0.397319	0.616453	0.268925	FALSE	CG3776
FBtr0343506;FBtr0072396	21.8798	21.8798	21.8798	21.8798	21.8798	26.1091	21.8798	24.5826	0.500905	0.523405	-1.73304	FALSE	CG3829
FBtr0345678;FBtr0072397	29.7865	29.631	29.6169	29.7915	29.5205	29.6371	29.4868	29.4571	0.239608	0.717166	0.181105	FALSE	uzip
FBtr0343507;FBtr0072402;FBtr0072400;FBtr0072401;FBtr0343508	30.2838	31.0556	30.5603	30.1893	31.0725	31.006	31.0955	30.9848	0.284545	0.685389	-0.51745	FALSE	emp
FBtr0072403	27.4109	27.4926	26.7343	26.9348	27.4111	27.3173	26.9851	26.6863	0.917478	0.066547	0.0431693	FALSE	CG2736
FBtr0343510;FBtr0343509;FBtr0072404	21.8798	21.8798	21.8798	21.8798	21.8798	21.8798	21.8798	21.8798	0.500905	0	0	FALSE	Phk-3
FBtr0072406;FBtr0072405	33.5975	33.5312	33.7113	33.5597	33.415	33.1315	33.3842	33.5755	0.37241	0.630372	0.223361	FALSE	RpL19
FBtr0072409	21.8798	21.8798	21.8798	21.8798	21.8798	21.8798	21.8798	21.8798	0.500905	0	0	FALSE	CG2790
FBtr0072411	30.173	30.4247	30.4373	30.4189	30.508	30.2709	29.9629	29.9999	0.500905	0.424945	0.178044	FALSE	Tina-1
FBtr0072412;FBtr0345515;FBtr0309243	27.1426	26.6017	27.0145	23.3159	26.9108	27.0155	24.0467	24.2593	0.814834	0.142625	0.460575	FALSE	CG2811
FBtr0309244;FBtr0072413	27.6993	28.3927	28.1285	27.8418	28.4491	27.9625	28.6267	28.7485	0.485129	0.56611	-0.431132	FALSE	CG30427
FBtr0300957;FBtr0300956;FBtr0072414	21.8798	21.8798	21.8798	21.8798	26.0194	23.5407	26.221	26.457	0.0394297	0.85242	-3.67973	FALSE	CG30427
FBtr0072417	27.8103	28.3791	28.2201	27.6413	28.8272	27.6987	29.0846	29.0043	0.500905	0.544112	-0.641008	FALSE	pain
FBtr0072420	23.5516	23.5362	23.6962	26.2331	26.5545	26.2805	26.4248	24.4238	0.437294	0.593117	-1.66662	FALSE	Ance-5
FBtr0072423	21.8798	21.8798	21.8798	21.8798	21.8798	21.8798	21.8798	21.8798	0.500905	0	0	FALSE	CG16896
FBtr0072425	21.8798	21.8798	21.8798	21.8798	21.8798	21.8798	21.8798	21.8798	0.500905	0	0	FALSE	Orc4
FBtr0072427	23.4879	21.8798	21.8798	24.3646	21.8798	21.8798	21.8798	21.8798	0.500905	0.524265	1.02323	FALSE	Reg-5
FBtr0072429	28.5982	28.8448	28.6109	28.4844	28.9001	28.7133	28.6369	28.7284	0.500905	0.404068	-0.110093	FALSE	Aats-tyr-m
FBtr0072430	27.6128	24.2908	27.3353	22.8426	27.8072	26.5425	26.2462	21.8798	0.973717	0.0216112	-0.0985497	FALSE	Lcp9
FBtr0072433;FBtr0072434;FBtr0072435;FBtr0308684	29.5779	29.5658	29.5082	29.252	29.8568	29.8219	29.627	29.6708	0.251385	0.707649	-0.268175	FALSE	Eps-15
FBtr0343496;FBtr0305310;FBtr0305309;FBtr0072436	33.8054	33.6383	33.9894	33.6739	33.6993	33.6198	33.8198	33.7041	0.628612	0.269511	0.0659658	FALSE	GstE12
FBtr0310371;FBtr0072437	27.3745	27.8192	26.7131	27.6442	27.568	26.9388	27.0641	27.3911	0.741109	0.194482	0.147213	FALSE	CG12848
FBtr0333174;FBtr0072454	23.7417	21.6604	26.8267	30.2134	27.7676	25.3544	27.4498	27.3921	0.643752	0.260275	-1.38041	FALSE	Peb
FBtr0345580;FBtr0072455	21.8798	21.8798	27.6175	28.8144	26.2748	25.0422	24.4657	23.0383	0.917545	0.0664571	0.342611	FALSE	PebII
FBtr0072463	36.4196	36.5938	36.6137	36.0353	36.6658	36.6576	36.2708	36.4093	0.744031	0.192538	-0.0852728	FALSE	Lsp1gamma
FBtr0072467;FBtr0072466;FBtr0072465;FBtr0072468;FBtr0333218;FBtr0072464;FBtr0072471;FBtr0072470;FBtr0072469	24.1422	25.0135	23.9144	23.5152	25.3512	24.8591	23.4669	25.3436	0.500905	0.387647	-0.608895	FALSE	Pdk1
FBtr0299865;FBtr0299866;FBtr0072475;FBtr0301889;FBtr0299864	21.8798	21.8798	21.8798	21.8798	21.8798	21.8798	21.8798	21.8798	0.500905	0	0	FALSE	p130CAS
FBtr0305546;FBtr0305545;FBtr0305544;FBtr0072479;FBtr0072478;FBtr0072477	30.3143	31.4255	31.1977	31.0333	31.6314	31.4138	31.4339	31.3415	0.484139	0.566738	-0.462414	FALSE	Mtch
FBtr0072481;FBtr0072480;FBtr0346614	23.3632	24.7004	24.0793	24.6016	24.0065	23.7393	23.1248	24.3532	0.525184	0.3373	0.380144	FALSE	mri
FBtr0072483	27.2674	27.3777	27.5942	27.5446	27.5978	27.7007	27.75	27.628	0.272925	0.691696	-0.223181	FALSE	NitFhit
FBtr0072487;FBtr0072486	25.6591	26.3947	27.1639	25.8094	28.1156	27.7474	27.5194	27.8322	0.0901533	0.810965	-1.54685	FALSE	CG16940
FBtr0072501	21.8798	21.8798	21.8798	21.8798	23.8697	23.8824	24.5281	23.3373	0.00703726	0.897252	-2.02459	TRUE	mthl14
FBtr0310415;FBtr0072503	30.1677	30.2682	30.05	30.0461	29.8676	30.0818	30.0799	29.6246	0.500905	0.556888	0.219515	FALSE	mRpL17
FBtr0332839;FBtr0332838;FBtr0072506;FBtr0332837;FBtr0332836	22.5691	23.4844	24.7869	23.2851	24.4869	24.1743	24.6596	24.8666	0.412187	0.60781	-1.0155	FALSE	miple2
FBtr0332841;FBtr0072516;FBtr0072515;FBtr0072517	21.8798	24.4488	21.8798	21.8798	21.8798	24.0584	25.2164	24.8544	0.500905	0.48892	-1.48023	FALSE	fwd
FBtr0332107;FBtr0072519	33.7668	34.0075	33.9354	33.8282	33.9317	33.9105	33.8458	33.9725	0.74613	0.190967	-0.0306267	FALSE	Tudor-SN
FBtr0305325;FBtr0332108;FBtr0332110;FBtr0332109;FBtr0072520	21.8798	21.8798	23.6624	21.8798	21.8798	23.9405	24.459	21.8798	0.556328	0.316386	-0.714325	FALSE	DIP2
FBtr0072522;FBtr0332103;FBtr0332104;FBtr0301348;FBtr0072521;FBtr0332102;FBtr0301349;FBtr0072523;FBtr0332101	24.1625	23.3998	23.8632	24.0907	21.8798	24.4241	24.0567	23.7349	0.699504	0.222753	0.355182	FALSE	E(bx)
FBtr0072527;FBtr0072526	21.8798	23.4654	21.8798	21.8798	21.8798	21.8798	21.8798	21.8798	0.500905	0.353553	0.396407	FALSE	thoc7
FBtr0344841;FBtr0344842;FBtr0072528;FBtr0331407;FBtr0344840	24.0005	21.8798	21.8798	21.8798	21.8798	21.8798	24.8066	21.8798	0.892926	0.0848195	-0.201528	FALSE	CG7028
FBtr0072529;FBtr0072530	27.3316	27.9141	27.2095	27.3951	27.0864	26.2997	26.8158	27.9024	0.500905	0.406858	0.436484	FALSE	Gyk
FBtr0334069;FBtr0301890;FBtr0072536;FBtr0072535;FBtr0072534	27.1778	27.5329	28.0297	27.9012	27.2113	28.0508	28.1858	28.2344	0.571533	0.305673	-0.260168	FALSE	Vdup1
FBtr0072537	26.1869	22.8326	22.6089	25.5082	22.0383	23.1845	21.8798	21.8798	0.407896	0.610141	2.0386	FALSE	CG7049
FBtr0331786;FBtr0072552;FBtr0072551	21.8798	21.8798	21.8798	21.8798	21.8798	21.8798	21.8798	21.8798	0.500905	0	0	FALSE	hipk
FBtr0072553	21.8798	21.8798	21.8798	21.8798	28.569	28.2484	28.5043	27.9079	1.69118e-06	0.933888	-6.42763	TRUE	Ppm1
FBtr0072554;FBtr0344912	23.0593	23.5897	24.1131	23.2082	21.8798	21.8798	22.9069	21.8798	0.119773	0.791859	1.35603	FALSE	MED14
FBtr0306917;FBtr0072556	31.8644	31.8648	31.7818	31.857	31.5814	31.733	31.8204	31.6915	0.302444	0.671699	0.135398	FALSE	Gale
FBtr0072558	25.433	21.8798	21.8798	25.7756	22.9873	21.8798	21.8798	21.8798	0.500905	0.470403	1.58537	FALSE	MED30
FBtr0072559	23.7501	21.8798	23.9333	22.841	26.3083	24.0795	26.0918	26.0537	0.147064	0.773518	-2.53226	FALSE	CG3402
FBtr0072561	29.759	30.0376	29.6834	29.5699	29.7852	29.8649	29.6021	29.123	0.560863	0.313157	0.168685	FALSE	Reg-2
FBtr0072562	27.4325	27.216	27.4774	26.135	27.2521	27.6563	27.4455	27.4698	0.500905	0.411191	-0.390717	FALSE	CG13893
FBtr0072564	27.8991	27.3465	28.1166	27.8734	27.7058	28.0646	27.8766	27.7052	0.925188	0.0602423	-0.0291762	FALSE	Cypl
FBtr0333852;FBtr0333851;FBtr0110818;FBtr0072565;FBtr0333850;FBtr0112807	21.8798	21.8798	21.8798	21.8798	21.8798	21.8798	21.8798	21.8798	0.500905	0	0	FALSE	klar
FBtr0300727;FBtr0072569	23.0777	21.8798	24.1175	26.4162	26.5604	27.3228	27.0953	27.3101	0.194207	0.748331	-3.19931	FALSE	Cdc5
FBtr0072576	21.8798	21.8798	23.0821	24.44	21.8798	25.484	23.5915	21.8798	0.819183	0.139224	-0.388378	FALSE	CG32344
FBtr0072577;FBtr0330078	21.8798	21.8798	21.8798	21.8798	21.8798	21.8798	21.8798	21.8798	0.500905	0	0	FALSE	RabX6
FBtr0345588;FBtr0072584;FBtr0072583	29.4379	30.0447	30.0113	29.8002	30.2489	29.982	30.4434	30.3732	0.299876	0.673374	-0.438336	FALSE	CG13887
FBtr0072587	26.8539	27.6366	27.9423	27.591	27.8737	27.9002	27.9895	27.4204	0.500905	0.382927	-0.289979	FALSE	CG13890
FBtr0333267;FBtr0072589;FBtr0333266	26.6792	27.6531	26.8488	26.4734	27.6363	28.1726	26.5756	26.1543	0.794952	0.156323	-0.221075	FALSE	CG32479
FBtr0345005;FBtr0072593	27.0768	27.3151	27.3517	27.0507	27.1557	27.1715	27.6834	27.4719	0.500905	0.398067	-0.172038	FALSE	CG13907
FBtr0331403;FBtr0072596	21.8798	21.8798	21.8798	21.8798	26.1451	26.7127	26.7584	27.016	1.91442e-05	0.931301	-4.77825	TRUE	CG13901
FBtr0072597	27.9666	27.7188	28.4621	28.2699	28.2807	28.0106	28.8484	28.9059	0.500905	0.48598	-0.407047	FALSE	CG13900
FBtr0072601;FBtr0331769	27.1861	25.3121	26.282	26.9595	25.1696	25.8578	25.9766	26.001	0.500905	0.481963	0.683664	FALSE	hng3
FBtr0072607	21.8798	21.8798	21.8798	21.8798	21.8798	21.8798	24.4589	21.8798	0.500905	0.353553	-0.64478	FALSE	Vti1
FBtr0072608	21.8798	21.8798	21.8798	21.8798	21.8798	21.8798	21.8798	21.8798	0.500905	0	0	FALSE	CG32483
FBtr0072609	28.031	28.1885	28.1726	28.1384	28.4611	28.3809	28.3269	27.7464	0.712188	0.214246	-0.0962224	FALSE	CG3344
FBtr0072622;FBtr0072621	22.7663	25.9701	26.1358	24.5485	24.3564	23.8788	21.8798	24.0519	0.500905	0.454879	1.31344	FALSE	CG9205
FBtr0336738;FBtr0072634;FBtr0072630;FBtr0072629;FBtr0072628	24.7934	24.4987	21.8798	23.5865	23.6318	27.5396	23.4767	23.7491	0.611254	0.280717	-0.909711	FALSE	LysB;LysD;LysE;LysC
FBtr0072631	21.8798	21.8798	21.8798	21.8798	21.8798	21.8798	21.8798	21.8798	0.500905	0	0	FALSE	LysS
FBtr0072633	26.236	21.8798	25.984	25.5805	22.2478	24.602	23.8877	25.4815	0.647233	0.258106	0.865305	FALSE	LysP
FBtr0072635	32.593	31.578	32.2495	32.3833	31.3872	31.5141	31.4934	31.5301	0.197418	0.7467	0.719738	FALSE	CG9119
FBtr0072637	24.2277	21.8798	23.258	23.6744	24.6056	21.8798	24.6429	24.9876	0.558542	0.314786	-0.768978	FALSE	LysX
FBtr0072638	21.8798	21.8798	21.8798	21.8798	21.8798	21.8798	21.8798	21.8798	0.500905	0	0	FALSE	Trh
FBtr0333271;FBtr0072639	21.8798	21.8798	21.8798	21.8798	21.8798	21.8798	21.8798	21.8798	0.500905	0	0	FALSE	bab2
FBtr0072645;FBtr0072644	25.9777	23.9576	21.8352	21.8798	24.8029	21.8798	23.1749	25.0532	0.876193	0.0967999	-0.315131	FALSE	trio
FBtr0303217;FBtr0072652	27.517	28.4544	28.4108	28.3762	28.5188	28.425	29.0465	28.8847	0.453778	0.585884	-0.529171	FALSE	Sac1
FBtr0072653	21.8798	21.8798	21.8798	21.8798	23.0091	21.8798	23.6281	25.0777	0.361888	0.637162	-1.51887	FALSE	CG9129
FBtr0072657;FBtr0072655	21.8798	21.8798	21.8798	21.8798	27.171	27.1426	27.4293	27.7601	2.7059e-06	0.933509	-5.49598	TRUE	CG9130
FBtr0072661;FBtr0072660;FBtr0072659	26.8261	26.5464	26.5572	25.9498	21.8798	26.4306	27.0499	26.1968	0.546148	0.323258	1.08064	FALSE	CG9134
FBtr0072663	23.901	21.8798	21.8798	23.9321	22.709	21.8798	24.2321	25.4538	0.659616	0.249559	-0.670521	FALSE	Rabex-5
FBtr0072667	31.1793	30.8338	31.1961	30.9956	30.8227	30.889	30.8315	30.8869	0.37665	0.627845	0.193665	FALSE	CG9149
FBtr0072669;FBtr0072668	21.8798	21.8798	24.0604	21.8798	24.1626	21.8798	26.5232	24.461	0.500905	0.527335	-1.8317	FALSE	CG2469
FBtr0072671;FBtr0072670;FBtr0310555	26.5819	27.3912	26.1791	23.3313	27.1487	26.548	27.3002	26.657	0.500905	0.399167	-1.04263	FALSE	CG9153
FBtr0072674;FBtr0072673;FBtr0072672;FBtr0072675	30.4234	30.8118	30.7124	30.5432	30.4459	29.7217	30.5155	30.2611	0.462058	0.580581	0.386645	FALSE	Myo61F
FBtr0072677	28.9255	29.2664	29.1698	24.2872	29.1296	28.6568	28.8845	29.1489	0.566909	0.309058	-1.0427	FALSE	mtacp1
FBtr0072678	21.8798	21.8798	21.8798	21.8798	21.8798	21.8798	21.8798	21.8798	0.500905	0	0	FALSE	msd1
FBtr0072679	28.0213	27.1683	28.0329	28.3193	28.0227	28.0951	28.1316	27.9367	0.68006	0.235763	-0.161067	FALSE	l(3)02640
FBtr0310160;FBtr0072680	23.9308	23.2182	24.009	21.8798	25.0032	21.8798	21.8798	24.3022	0.996026	0.00273229	-0.00680411	FALSE	312
FBtr0072692	21.8798	21.8798	21.8798	21.8798	21.8798	21.8798	21.8798	21.8798	0.500905	0	0	FALSE	CG9168
FBtr0332655;FBtr0072695	21.8798	21.8798	21.8798	21.8798	25.0233	21.8798	24.1512	24.8032	0.242415	0.714494	-2.08457	FALSE	robl62A
FBtr0072699;FBtr0072701;FBtr0333395;FBtr0306557;FBtr0072702;FBtr0072700;FBtr0072698;FBtr0072697	32.2462	32.2828	32.3388	32.4577	32.7082	32.6171	32.5776	32.7432	0.0380898	0.854116	-0.330122	FALSE	Psa
FBtr0072704;FBtr0072705;FBtr0333402;FBtr0333401;FBtr0072703	21.8798	21.8798	21.8798	21.8798	21.8798	21.8798	21.8798	21.8798	0.500905	0	0	FALSE	CG12090
FBtr0072706	25.9042	23.8439	25.3251	23.443	24.0358	21.8798	21.8798	23.2991	0.346858	0.644896	1.85545	FALSE	cue
FBtr0072709;FBtr0301523;FBtr0300420;FBtr0300419;FBtr0300418;FBtr0300417;FBtr0300416;FBtr0072710;FBtr0072708;FBtr0072707	28.61	28.4746	28.9539	28.7749	28.319	28.1789	28.799	29.0881	0.774692	0.171064	0.107098	FALSE	pUf68
FBtr0332656;FBtr0072711	25.2537	25.1046	25.6864	24.1395	24.2599	23.3265	24.3622	26.4355	0.692714	0.227521	0.450023	FALSE	CG12084
FBtr0072717;FBtr0072718;FBtr0072716;FBtr0310161;FBtr0072719	24.9379	27.1349	26.0379	25.0174	27.0679	25.8518	27.1097	26.0841	0.500905	0.41757	-0.746385	FALSE	Ptp61F
FBtr0331865;FBtr0072722;FBtr0072721	25.7246	25.6199	26.1495	25.8115	24.8389	25.5479	25.7002	25.3936	0.417116	0.604409	0.456258	FALSE	CG2199
FBtr0331866;FBtr0072723	21.8798	21.8798	21.8798	21.8798	21.8798	21.8798	21.8798	21.8798	0.500905	0	0	FALSE	CG2211
FBtr0072724	21.8798	21.8798	21.8798	21.8798	21.8798	21.8798	21.8798	21.8798	0.500905	0	0	FALSE	msd5
FBtr0072726;FBtr0072725	21.8798	21.8798	21.8798	21.8798	23.7698	24.0056	21.8798	21.8798	0.500905	0.538825	-1.00395	FALSE	CG9184
FBtr0072728;FBtr0072727	29.5967	29.8392	30.0241	29.1477	30.1326	29.7522	29.8843	29.8835	0.500905	0.43091	-0.261213	FALSE	CG9186
FBtr0331867;FBtr0072729;FBtr0345006	28.9153	28.7762	28.872	28.6354	28.6494	28.6691	28.4666	28.1436	0.348324	0.643899	0.317529	FALSE	CG2277
FBtr0331868;FBtr0072730	28.8881	29.2179	29.546	29.2365	29.4967	29.5053	29.5205	29.1631	0.500905	0.424658	-0.199268	FALSE	Rac1
FBtr0072731	24.201	21.8798	24.0082	21.8798	21.8798	23.4773	23.5896	23.5231	0.922604	0.0624134	-0.125259	FALSE	Psf1
FBtr0072733	21.8798	21.8798	21.8798	21.8798	21.8798	21.8798	21.8798	21.8798	0.500905	0	0	FALSE	Klp61F
FBtr0072737;FBtr0072736;FBtr0072735	21.8798	21.8798	21.8798	25.2208	21.8798	21.8798	21.8798	21.8798	0.500905	0.353553	0.835255	FALSE	CG7852
FBtr0345365;FBtr0333396;FBtr0072741;FBtr0072740;FBtr0072739;FBtr0072738	24.4602	21.8798	21.8798	22.3443	27.2461	26.9841	26.8782	26.767	0.0154826	0.881918	-4.32784	FALSE	Cct1
FBtr0072744	21.8798	21.8798	21.8798	21.8798	21.8798	21.8798	21.8798	21.8798	0.500905	0	0	FALSE	CG12003
FBtr0072755;FBtr0072754	27.0803	27.9492	27.8454	27.6706	28.0175	27.9024	28.4489	28.3052	0.355048	0.640181	-0.532148	FALSE	ABCB7
FBtr0072757	21.8798	21.8798	21.8798	21.8798	21.8798	21.8798	21.8798	21.8798	0.500905	0	0	FALSE	CG33230
FBtr0331460;FBtr0072762;FBtr0346821	26.4925	26.6509	24.168	21.8798	26.1865	27.0073	26.9372	27.5214	0.499712	0.558833	-2.11531	FALSE	CG7970
FBtr0072764	21.8798	21.8798	21.8798	21.8798	21.8798	21.8798	21.8798	21.8798	0.500905	0	0	FALSE	CG12011
FBtr0072766	21.8798	21.8798	21.8798	21.8798	22.6148	21.8798	23.8144	24.1193	0.341446	0.647562	-1.22728	FALSE	CG12035
FBtr0345817;FBtr0072771;FBtr0072770;FBtr0072769;FBtr0072768;FBtr0072767	27.1868	27.3443	26.2348	26.805	27.5041	27.0455	27.3254	27.2869	0.500905	0.489784	-0.39778	FALSE	Gk
FBtr0334074;FBtr0300292;FBtr0334073;FBtr0072774	23.6186	22.7982	23.9479	24.4844	23.5133	21.8798	23.6953	23.5309	0.500905	0.355409	0.55746	FALSE	CG8001
FBtr0072775	21.8798	21.8798	21.8798	21.8798	21.8798	21.8798	21.8798	21.8798	0.500905	0	0	FALSE	CG12018
FBtr0072776	29.4802	29.1328	29.4639	28.9675	29.2031	29.6787	28.6821	28.6071	0.606673	0.283618	0.218348	FALSE	mRpL46
FBtr0072777	30.3692	30.2808	30.3811	30.5521	30.2956	30.1147	30.2041	30.2381	0.275985	0.690525	0.182698	FALSE	Cdc37
FBtr0301625;FBtr0072781;FBtr0072779	23.9589	23.358	23.3046	26.1424	23.3792	24.5358	23.3885	24.4903	0.839865	0.123612	0.242506	FALSE	Patj
FBtr0072784	21.8798	21.8798	21.8798	21.8798	21.8798	21.8798	21.8798	21.8798	0.500905	0	0	FALSE	GV1
FBtr0332875;FBtr0299562;FBtr0072786	28.8009	29.2792	28.3695	29.1362	28.6344	28.0588	27.6429	28.024	0.254033	0.704504	0.806443	FALSE	Cpr62Bb
FBtr0072789;FBtr0332879	23.3623	24.3657	24.6774	25.5518	24.1876	21.5405	23.0696	27.0182	0.787143	0.162152	0.535329	FALSE	alpha-Spec
FBtr0072790	24.5095	22.3949	23.5759	23.2176	21.8798	21.8798	21.8798	21.8798	0.158364	0.768236	1.54473	FALSE	dlt
FBtr0072791	28.2796	28.5852	27.8013	26.2236	28.4044	28.4203	28.4502	27.9161	0.500905	0.372944	-0.575337	FALSE	CG2021
FBtr0334075;FBtr0305966;FBtr0072795	28.1346	28.0266	28.2077	28.6255	28.5504	27.9312	28.2808	28.4955	0.83241	0.129737	-0.0658732	FALSE	Cht2
FBtr0072799;FBtr0334079;FBtr0072798;FBtr0334078;FBtr0334080;FBtr0309845	21.8798	21.8798	21.8798	21.8798	21.8798	21.8798	21.8798	21.8798	0.500905	0	0	FALSE	drpr
FBtr0334081;FBtr0072802	21.8798	21.8798	21.8798	21.8798	21.8798	21.8798	21.8798	21.8798	0.500905	0	0	FALSE	CG13931
FBtr0072805	33.3275	33.584	33.6032	33.6028	33.5109	33.4906	33.798	33.6798	0.542188	0.325809	-0.0904358	FALSE	RpL23A
FBtr0309252;FBtr0072806;FBtr0072807;FBtr0303107	21.8798	21.8798	21.8798	21.8798	21.8798	21.8798	21.8798	23.7931	0.500905	0.353553	-0.478323	FALSE	CG7971
FBtr0072809	28.6312	28.3148	28.2993	28.7191	28.0104	28.4266	28.5809	28.2338	0.500905	0.37963	0.17818	FALSE	CG7967
FBtr0072810	21.8798	21.8798	21.8798	21.8798	21.8798	21.8798	21.8798	21.8798	0.500905	0	0	FALSE	CG17249
FBtr0072812;FBtr0072811	31.3661	31.6088	31.6557	31.3756	31.6834	31.5004	31.9861	32.1484	0.443745	0.590243	-0.328047	FALSE	alphaCOP
FBtr0072813;FBtr0072814	23.5322	23.2046	23.9123	21.8798	21.8798	24.0353	23.5417	24.528	0.750619	0.187741	-0.363969	FALSE	metl
FBtr0331462;FBtr0300893;FBtr0072815;FBtr0331461;FBtr0306578;FBtr0302310;FBtr0300894;FBtr0072819	27.9968	27.4056	27.9714	28.3792	27.4525	28.3235	28.3644	28.4182	0.668744	0.243403	-0.20138	FALSE	nSyb
FBtr0072822	28.1027	27.7042	27.6398	27.6293	27.7601	28.1104	27.9337	27.9543	0.500905	0.433017	-0.170597	FALSE	CG13928
FBtr0072823	28.0612	27.7065	28.2192	28.2883	27.9392	28.1812	28.2767	27.5355	0.800002	0.153609	0.085687	FALSE	CG13926
FBtr0072827;FBtr0072826	21.8798	21.8798	21.8798	21.8798	21.8798	23.6544	21.8798	21.8798	0.500905	0.353553	-0.443664	FALSE	CG7879
FBtr0072829;FBtr0072828	21.8798	21.8798	21.8798	21.8798	24.2195	24.3252	21.8798	24.9745	0.241634	0.715386	-1.96999	FALSE	CG12099
FBtr0333400;FBtr0072831	25.8328	24.1991	25.5251	25.6461	22.8169	24.725	23.6893	23.3643	0.232531	0.726131	1.65188	FALSE	CG12091
FBtr0072833;FBtr0303152;FBtr0072832	27.5237	27.2536	26.7443	27.1834	27.267	27.2048	26.7857	26.8315	0.619182	0.275643	0.154006	FALSE	CG12024
FBtr0345381;FBtr0332668;FBtr0072834	24.8717	22.2516	21.8798	23.1361	24.8663	24.2379	24.4547	24.6751	0.370092	0.631227	-1.52372	FALSE	CG12025
FBtr0072837;FBtr0072836	21.8798	21.8798	21.8798	21.8798	21.8798	21.8798	21.8798	21.8798	0.500905	0	0	FALSE	Tmhs
FBtr0072841	21.8798	21.8798	21.8798	21.8798	25.8595	23.4957	24.4961	24.9738	0.0326924	0.860318	-2.82652	FALSE	Mfap1
FBtr0333430;FBtr0072842	21.8798	21.8798	21.8798	21.8798	21.8798	21.8798	21.8798	21.8798	0.500905	0	0	FALSE	Cnb
FBtr0333431;FBtr0072843;FBtr0072844	30.4547	30.4009	30.2949	30.4094	30.3456	30.2693	30.4301	30.3233	0.500905	0.355793	0.0479048	FALSE	SCOT
FBtr0072857;FBtr0301465;FBtr0072856	23.9276	21.8798	24.4059	24.6996	21.8798	21.8798	21.8798	21.8798	0.241634	0.715099	1.84846	FALSE	mu2
FBtr0072865;FBtr0072864	23.4345	26.2235	25.8424	25.4778	27.7745	26.2582	26.902	27.2697	0.294005	0.678793	-1.80655	FALSE	dre4
FBtr0345807;FBtr0072866	22.633	23.87	23.1558	21.8798	26.4521	26.484	26.8608	26.3775	0.00674942	0.898311	-3.65897	TRUE	HBS1
FBtr0332671;FBtr0303154;FBtr0072867	29.5811	30.2118	29.5663	30.0895	30.2244	29.9864	30.3674	29.9364	0.500905	0.452886	-0.266476	FALSE	R
FBtr0332673;FBtr0072869	31.6027	31.5321	31.3441	31.8295	31.6262	32.0798	31.4682	31.4148	0.810842	0.145963	-0.0701458	FALSE	Cpr62Bc
FBtr0072871;FBtr0072872	21.8798	21.8798	21.8798	21.8798	21.8798	21.8798	21.8798	21.8798	0.500905	0	0	FALSE	CG8960
FBtr0332664;FBtr0072877	28.8774	28.4958	28.7788	28.9431	28.4936	28.9729	28.9453	28.5448	0.89652	0.0816803	0.0346167	FALSE	CG2034
FBtr0072879	21.8798	21.8798	21.8798	21.8798	21.8798	21.8798	21.8798	21.8798	0.500905	0	0	FALSE	CG13806
FBtr0072881	21.8798	21.8798	21.8798	21.8798	21.8798	21.8798	21.8798	21.8798	0.500905	0	0	FALSE	CG32302
FBtr0072883	21.8798	21.8798	21.8798	21.8798	21.8798	21.8798	21.8798	21.8798	0.500905	0	0	FALSE	yellow-g2
FBtr0072889	30.8914	30.938	30.7257	31.3296	30.8946	30.8252	30.8485	30.6845	0.500905	0.401659	0.157985	FALSE	CG8993
FBtr0072890	21.8798	24.5872	21.8798	23.5055	21.8798	21.8798	21.8798	21.8798	0.500905	0.518933	1.08329	FALSE	CG9004
FBtr0072899	21.8798	21.8798	23.8081	24.3088	21.8798	21.8798	21.8798	21.8798	0.500905	0.53537	1.08935	FALSE	CG15877
FBtr0331416;FBtr0331415;FBtr0289966;FBtr0072900	30.3175	30.1235	30.0513	30.1871	30.1215	30.1715	29.8457	29.7847	0.500905	0.529862	0.189004	FALSE	mRpL23
FBtr0345587;FBtr0300773;FBtr0072901	21.8798	21.8798	21.8798	21.8798	21.8798	21.8798	21.8798	21.8798	0.500905	0	0	FALSE	CG1317
FBtr0072902	21.8798	21.8798	21.8798	21.8798	21.8798	21.8798	21.8798	21.8798	0.500905	0	0	FALSE	yellow-g
FBtr0072903	23.4883	27.1719	23.6715	23.8702	24.0528	24.7027	23.1706	22.8993	0.560859	0.313203	0.844117	FALSE	ecd
FBtr0072904	21.8798	21.8798	21.8798	21.8798	24.5424	21.8798	21.8798	21.8798	0.500905	0.353553	-0.665653	FALSE	oxt
FBtr0072908;FBtr0072906;FBtr0072907;FBtr0072905	23.8777	26.4124	25.897	23.6021	26.6528	23.6825	26.5241	26.8853	0.521154	0.340069	-0.988854	FALSE	CG1275
FBtr0072910;FBtr0072909	25.8706	26.4929	27.0313	27.4457	26.5444	26.699	26.7125	26.0956	0.735084	0.198755	0.197246	FALSE	CG9018
FBtr0072912;FBtr0308231;FBtr0308230	25.9175	23.4425	25.5215	21.8798	21.8798	21.8798	21.8798	21.8798	0.319348	0.661814	2.31054	FALSE	CG5707
FBtr0072913	21.8798	21.8798	21.8798	21.8798	21.8798	21.8798	21.8798	21.8798	0.500905	0	0	FALSE	CG15820
FBtr0346076;FBtr0072915	26.7452	23.5658	26.0086	23.6068	26.1424	24.5784	23.7119	25.9921	0.942175	0.0472523	-0.124619	FALSE	CG5704
FBtr0072925;FBtr0072924	34.2284	34.1512	34.6042	34.4452	34.0777	34.0165	34.0997	33.972	0.239099	0.719201	0.315767	FALSE	RpL8
FBtr0072926;FBtr0072927	21.8798	21.8798	21.8798	21.8798	21.8798	21.8798	21.8798	21.8798	0.500905	0	0	FALSE	dos
FBtr0072929	28.5232	28.8151	27.9938	28.1188	28.7279	28.6274	28.2464	27.9132	0.972069	0.0229839	-0.015966	FALSE	CG16985
FBtr0302434;FBtr0072930	27.5637	26.9378	28.7142	28.6828	27.0606	27.5544	28.638	27.3026	0.699504	0.222859	0.335698	FALSE	CG16986
FBtr0290340;FBtr0072936;FBtr0072935;FBtr0072934;FBtr0072933;FBtr0072932;FBtr0072931	26.2194	25.2799	25.805	26.2533	25.6459	27.014	27.7056	26.9249	0.467435	0.577275	-0.933182	FALSE	MEP-1
FBtr0333445;FBtr0072937	21.8798	21.8798	21.8798	21.8798	21.8798	21.8798	21.8798	21.8798	0.500905	0	0	FALSE	CG1143
FBtr0345027;FBtr0333446;FBtr0303022;FBtr0072938	21.8798	21.8798	21.8798	21.8798	21.8798	21.8798	21.8798	21.8798	0.500905	0	0	FALSE	CG1246
FBtr0072943	21.8798	21.8798	21.8798	23.8255	29.0521	29.019	28.1987	29.0567	0.00113147	0.91709	-6.46541	TRUE	Acp62F
FBtr0072948	26.8419	26.5159	27.393	27.1723	26.5693	26.822	26.9639	27.1404	0.767593	0.17679	0.106872	FALSE	Aats-pro
FBtr0072954;FBtr0072953;FBtr0072952;FBtr0072951	28.4026	27.8401	28.4987	27.6365	27.6096	27.8517	26.4353	27.3378	0.410426	0.608686	0.78587	FALSE	Pxn
FBtr0072956;FBtr0333362;FBtr0333365;FBtr0072957;FBtr0333364;FBtr0333363;FBtr0072959;FBtr0072958	27.3906	27.906	27.8999	26.7601	27.9303	28.0614	27.817	27.8535	0.500905	0.498114	-0.426392	FALSE	msn
FBtr0072963;FBtr0331414;FBtr0072965;FBtr0072966;FBtr0072964;FBtr0306577	27.7048	27.5882	27.771	27.2483	28.7941	28.5724	27.9561	28.7411	0.0965921	0.806578	-0.937848	FALSE	CG16758
FBtr0072967	27.2898	27.9184	27.8187	27.2565	27.8422	26.8695	28.1	28.1711	0.749329	0.188535	-0.174822	FALSE	Cyp4d20
FBtr0072968	21.8798	21.8798	21.8798	21.8798	21.8798	24.4947	24.6298	21.8798	0.500905	0.539834	-1.34123	FALSE	CG16762
FBtr0072969	29.3831	29.9699	29.8847	29.3143	30.2857	29.218	30.0283	30.0188	0.560506	0.313593	-0.249678	FALSE	Non2
FBtr0333441;FBtr0072970	21.8798	21.8798	21.8798	24.3593	21.8798	22.2163	24.0821	23.3596	0.763354	0.17971	-0.384788	FALSE	Atg2
FBtr0333442;FBtr0072973;FBtr0072972	21.7601	22.75	22.5602	24.5341	25.7814	24.259	24.1295	25.7335	0.254002	0.704684	-2.07476	FALSE	pgant6
FBtr0072978	30.6953	30.7827	30.9772	30.5836	30.847	30.4595	30.5788	30.9296	0.802228	0.1524	0.0559711	FALSE	CG2107
FBtr0332084;FBtr0072979	21.8798	21.8798	22.8575	21.8798	23.8772	25.3126	21.8798	21.8798	0.500905	0.432401	-1.11312	FALSE	CG2113
FBtr0345029;FBtr0072981;FBtr0345028	21.8798	21.8798	25.8758	21.8798	23.1526	21.8798	21.8798	21.8798	0.673685	0.239692	0.680808	FALSE	CG2162
FBtr0332112;FBtr0072983;FBtr0072982	28.2183	28.0583	28.0066	27.9528	28.533	28.6062	28.7313	28.6668	0.00783263	0.895146	-0.57535	FALSE	Jafrac2
FBtr0072985	25.8443	25.0695	26.0985	23.6024	21.8798	26.6693	25.6844	26.1339	0.976723	0.0192516	0.0618001	FALSE	CG32485
FBtr0072986;FBtr0072988;FBtr0072987;FBtr0072989	25.0575	24.5012	22.1603	21.8798	24.4295	21.8798	22.7892	24.8429	0.963163	0.0307094	-0.08567	FALSE	CG1271
FBtr0072990	21.8798	21.8798	21.8798	21.8798	21.8798	21.8798	21.8798	21.8798	0.500905	0	0	FALSE	CG16753
FBtr0072996;FBtr0072995;FBtr0072993;FBtr0113129;FBtr0332113;FBtr0113130;FBtr0072999	21.8798	21.8798	21.8798	21.8798	21.8798	21.8798	21.8798	21.8798	0.500905	0	0	FALSE	CG11486
FBtr0073004	27.0303	27.4658	26.9684	26.3985	26.3963	27.6313	27.3639	27.2548	0.717635	0.210892	-0.195816	FALSE	CG32486
FBtr0073005	26.7852	27.2169	27.5489	26.9739	27.4635	27.9998	28.1746	27.9566	0.171382	0.760224	-0.767394	FALSE	scramb2
FBtr0346075;FBtr0073008	21.8798	21.8798	21.8798	21.8798	23.0738	21.8798	21.3947	21.8798	0.754946	0.185456	-0.177237	FALSE	CG32488
FBtr0073011	21.8798	22.8671	21.8798	23.0353	24.4394	21.8798	21.8798	24.3206	0.542688	0.325295	-0.714432	FALSE	spz5
FBtr0073015	21.8798	21.8798	21.8798	21.8798	21.8798	23.2849	23.5291	21.8798	0.500905	0.537775	-0.763629	FALSE	CG12093
FBtr0073016	28.5709	28.0335	28.8641	29.1924	27.4317	28.3443	28.8273	28.6728	0.560859	0.313322	0.346196	FALSE	CG9977
FBtr0073023	28.0958	28.361	28.7801	27.6865	27.8987	28.0555	28.6112	28.6474	0.88324	0.0919776	-0.0723195	FALSE	CG1291
FBtr0073033	21.8798	21.8798	21.8798	21.8798	21.8798	21.8798	21.8798	21.8798	0.500905	0	0	FALSE	CG32278
FBtr0073034	23.5325	21.8798	23.3825	22.9105	23.9856	21.8798	21.8798	21.8798	0.593713	0.292353	0.520069	FALSE	CG32281
FBtr0073036;FBtr0332098;FBtr0332099;FBtr0332097;FBtr0073035	21.8798	21.8798	21.8798	21.8798	21.8798	21.8798	21.8798	21.8798	0.500905	0	0	FALSE	Girdin
FBtr0073038	21.8798	21.8798	21.8798	21.8798	21.8798	21.8798	21.8798	21.8798	0.500905	0	0	FALSE	CG14957
FBtr0332873;FBtr0073040	35.0347	35.1749	35.0718	34.7464	35.4435	35.2093	35.4583	35.3096	0.205325	0.742	-0.348226	FALSE	Hsp83
FBtr0073042	23.6604	23.0068	21.8798	21.8798	26.0626	23.8174	26.1112	22.6992	0.391986	0.619049	-2.06595	FALSE	gry
FBtr0073044	29.856	29.9076	29.5921	29.8581	29.6448	29.821	29.478	29.5351	0.500905	0.547303	0.183711	FALSE	CG17737
FBtr0308061;FBtr0073045;FBtr0073046	28.0299	27.1785	27.5064	28.1165	28.321	28.2285	27.9835	27.5892	0.500905	0.403368	-0.322751	FALSE	CG11505
FBtr0308313;FBtr0308312;FBtr0073052;FBtr0308311	21.8798	21.8798	21.8798	21.8798	21.8798	21.8798	21.8798	21.8798	0.500905	0	0	FALSE	CG12017
FBtr0308314;FBtr0073053	21.8798	21.8798	21.8798	21.8798	21.8798	21.8798	21.8798	21.8798	0.500905	0	0	FALSE	CG12009
FBtr0073059	29.6466	28.887	28.5403	28.9438	29.1869	28.6859	28.0484	28.691	0.500905	0.373954	0.35141	FALSE	Drsl2
FBtr0073061	24.6914	21.8798	23.6169	24.5923	21.8798	21.8798	21.8798	21.8798	0.256154	0.702373	1.81532	FALSE	Drsl4
FBtr0073062	25.8932	24.3166	26.0799	25.3548	21.8798	21.8798	21.8798	24.024	0.0756152	0.821365	2.9953	FALSE	Drsl5
FBtr0073064;FBtr0073063	21.8798	21.8798	21.8798	21.8798	21.8798	21.8798	23.7844	21.8798	0.500905	0.353553	-0.476163	FALSE	CG12016
FBtr0073067;FBtr0073066;FBtr0073068	32.653	32.693	32.7276	32.5628	32.4276	32.703	32.6229	32.544	0.500905	0.421194	0.0847589	FALSE	PHGPx
FBtr0073069	34.7001	33.0194	32.9814	34.7177	34.5178	35.251	33.9368	34.136	0.500905	0.371147	-0.605735	FALSE	CG14961
FBtr0332057;FBtr0073072;FBtr0332056;FBtr0300017;FBtr0303857;FBtr0073070;FBtr0073071	31.4568	32.0767	31.7698	31.6024	31.8492	31.3874	31.8343	31.9553	0.92248	0.0625889	-0.0301034	FALSE	kst
FBtr0073073	27.0173	26.5679	26.9062	26.9996	23.5026	24.2173	21.8798	21.8798	0.0180467	0.878252	4.00292	FALSE	Drs
FBtr0073075	21.8798	21.8798	21.8798	21.8798	21.8798	21.8798	21.8798	21.8798	0.500905	0	0	FALSE	CG12010
FBtr0073077	21.8798	21.8798	21.8798	24.4183	21.8798	21.8798	21.8798	21.8798	0.500905	0.353553	0.634627	FALSE	CG12014
FBtr0073079;FBtr0073078	21.8798	21.8798	24.7478	21.8798	21.8798	21.8798	21.8798	21.8798	0.500905	0.353553	0.717009	FALSE	YT521-B
FBtr0073080	21.8798	21.8798	21.8798	21.8798	21.8798	21.8798	21.8798	21.8798	0.500905	0	0	FALSE	Drsl6
FBtr0073081	21.8798	21.8798	21.8798	21.8798	21.8798	21.8798	21.8798	21.8798	0.500905	0	0	FALSE	Drsl1
FBtr0073082	24.2365	21.8798	23.33	21.8798	21.8798	24.372	21.8798	23.6586	0.937183	0.051519	-0.116027	FALSE	CG14969
FBtr0332058;FBtr0073083;FBtr0073084	26.5113	26.9842	27.3795	26.9072	27.0307	27.1148	27.5045	27.4008	0.500905	0.489576	-0.317126	FALSE	Strip
FBtr0073090;FBtr0073089;FBtr0073088;FBtr0073087;FBtr0073086	21.8798	23.9401	23.9986	21.8798	21.8798	21.8798	21.8798	21.8798	0.500905	0.539991	1.04478	FALSE	CG14968
FBtr0073094;FBtr0073093	26.6241	22.9524	26.5965	27.0443	26.8617	25.9748	25.9143	26.8703	0.697445	0.224475	-0.600979	FALSE	CG17746
FBtr0306567;FBtr0302301;FBtr0302300;FBtr0073098;FBtr0073097;FBtr0073095	33.908	34.0022	34.1109	34.312	33.7883	33.7628	33.7918	33.8344	0.192238	0.749659	0.288965	FALSE	RpL28
FBtr0073102	21.8798	21.8798	21.8798	21.8798	21.8798	21.8798	21.8798	21.8798	0.500905	0	0	FALSE	CG33160
FBtr0073103	21.8798	21.8798	21.8798	21.8798	21.8798	21.8798	21.8798	21.8798	0.500905	0	0	FALSE	CG32277
FBtr0073108	24.7748	21.8798	24.257	24.7749	21.8798	21.8798	21.8798	21.8798	0.238161	0.719952	2.04184	FALSE	CG14966
FBtr0073109	21.8798	21.8798	21.8798	21.8798	21.8798	21.8798	21.8798	21.8798	0.500905	0	0	FALSE	CG14965
FBtr0073111	26.3403	27.7262	26.1893	26.8199	29.272	30.1538	27.937	28.8792	0.111406	0.79675	-2.29156	FALSE	CG14963
FBtr0073113	33.9566	33.6734	33.7278	34.0289	33.6366	33.7423	33.6769	33.6657	0.484444	0.566534	0.166289	FALSE	NDUFS3
FBtr0307308;FBtr0073114	31.3853	31.2589	31.3483	31.3084	31.4814	31.3261	31.7064	31.7291	0.339881	0.648795	-0.235549	FALSE	CG12082
FBtr0073115;FBtr0073117;FBtr0073116;FBtr0333894;FBtr0113133;FBtr0113132;FBtr0309235	21.8798	21.8798	21.8798	21.8798	21.8798	21.8798	21.8798	21.8798	0.500905	0	0	FALSE	CG11537
FBtr0337056;FBtr0306258;FBtr0333895;FBtr0073120;FBtr0073119;FBtr0073118;FBtr0337055	21.8798	21.8798	21.8798	21.8798	26.1291	25.4536	26.4088	26.6014	0.000198542	0.925856	-4.26846	TRUE	prominin-like
FBtr0073124	26.9039	25.7679	26.2974	23.8092	24.06	24.677	25.6133	25.511	0.521808	0.339608	0.729281	FALSE	Cht7
FBtr0110922;FBtr0302598;FBtr0110924;FBtr0110920;FBtr0073135;FBtr0073134;FBtr0073133;FBtr0301948;FBtr0110925;FBtr0110923;FBtr0110921;FBtr0073132;FBtr0073131;FBtr0330068	26.3753	26.4902	26.1081	26.5792	26.3214	25.5588	26.7402	26.8076	0.952249	0.0390423	0.0311738	FALSE	Eip63E
FBtr0073141	22.9116	24.0265	23.6633	24.5389	21.8798	21.8798	21.8798	21.8798	0.0363101	0.856264	1.9053	FALSE	ImpE2
FBtr0073142	24.2446	21.8798	23.0529	27.4158	22.7711	24.123	27.1279	27.0794	0.649741	0.256235	-1.12707	FALSE	CG32267
FBtr0309839;FBtr0309836;FBtr0073144;FBtr0309837;FBtr0309838	29.9359	30.2193	29.8937	29.4756	30.3781	29.8185	30.4679	30.2775	0.500905	0.529775	-0.354415	FALSE	eIF5B
FBtr0073148	21.8798	23.8022	23.4002	22.7584	21.8798	21.8798	21.8798	21.8798	0.294378	0.677885	1.08036	FALSE	IntS10
FBtr0073149;FBtr0073150	26.9633	27.094	27.17	27.1252	27.2172	27.11	27.9076	27.8317	0.42944	0.598177	-0.428489	FALSE	CG12006
FBtr0303096;FBtr0073151	34.6267	34.0934	34.4476	34.324	34.1175	34.1706	33.8946	34.2583	0.465182	0.578611	0.262672	FALSE	Scsalpha
FBtr0333209;FBtr0112844;FBtr0073152;FBtr0073153;FBtr0333210;FBtr0112845;FBtr0333208	26.1111	25.469	26.0786	25.6691	25.2651	25.9942	26.0465	25.7652	0.86901	0.102476	0.0642033	FALSE	enc
FBtr0073158;FBtr0330095	23.8649	22.2651	25.9108	27.251	21.8798	27.6361	24.8425	24.1488	0.943171	0.0462373	0.196146	FALSE	CG14977
FBtr0073159	29.5057	30.0202	30.3913	29.8818	30.0938	30.0032	30.4894	30.9673	0.500905	0.496309	-0.438677	FALSE	Sc2
FBtr0073160	21.8798	21.8798	21.8798	21.8798	21.8798	21.8798	21.8798	21.8798	0.500905	0	0	FALSE	ida
FBtr0073164	21.8798	21.8798	21.8798	21.8798	21.8798	21.8798	21.8798	21.8798	0.500905	0	0	FALSE	CG10853
FBtr0073171	32.5842	32.645	32.7046	32.6801	32.5875	32.42	32.5495	32.5941	0.32933	0.65479	0.115699	FALSE	CG10863
FBtr0073172	26.9163	26.7844	25.5934	23.5782	26.5949	25.7463	23.903	25.0782	0.802353	0.152211	0.387475	FALSE	CG12766
FBtr0073176	27.157	27.5163	27.1579	27.6471	27.3941	27.4696	27.2281	27.3288	0.950179	0.0406437	0.0144229	FALSE	mge
FBtr0073180	22.8069	24.2807	25.8926	24.6617	23.5562	24.4709	25.4558	26.0041	0.72479	0.205823	-0.461237	FALSE	Ccz1
FBtr0346805;FBtr0073182	21.8798	21.8798	21.8798	21.8798	23.1918	23.0444	26.0993	24.458	0.19331	0.748824	-2.31859	FALSE	Acp63F
FBtr0073185	21.8798	21.8798	21.8798	21.8798	21.8798	23.7937	23.9091	21.8798	0.500905	0.539754	-0.985795	FALSE	ntc
FBtr0113430;FBtr0073187;FBtr0332986;FBtr0308639;FBtr0303097;FBtr0308638;FBtr0073188	21.8798	21.8798	21.8798	21.8798	21.8798	21.8798	21.8798	21.8798	0.500905	0	0	FALSE	CG32264
FBtr0346806;FBtr0073193	26.6444	27.0378	26.444	26.954	27.2607	27.0268	27.0866	26.8541	0.500905	0.549794	-0.286978	FALSE	Mul1
FBtr0073202	21.8798	21.8798	24.3552	21.8798	21.8798	22.9793	23.9969	21.8798	0.888553	0.0879472	-0.185304	FALSE	Rcd5
FBtr0073203	23.2664	23.7049	22.9404	23.8279	26.7698	27.5563	21.8798	23.341	0.500905	0.370859	-1.45181	FALSE	CG1136
FBtr0332979;FBtr0073204	23.0783	24.5331	25.7768	25.5893	27.4688	26.7178	27.1446	27.3498	0.129457	0.785368	-2.42587	FALSE	CG18869
FBtr0073205	21.8798	21.8798	21.8798	21.8798	21.8798	21.8798	21.8798	21.8798	0.500905	0	0	FALSE	dib
FBtr0073208	24.4174	21.8798	21.8798	21.8798	21.8798	21.8798	21.8798	21.8798	0.500905	0.353553	0.634413	FALSE	CG14990
FBtr0073210;FBtr0073209	29.2167	29.6265	29.9936	29.3704	29.3875	29.5925	30.2749	29.8574	0.55447	0.317552	-0.226257	FALSE	Fit1
FBtr0073211	24.8453	21.8798	21.8798	21.8798	21.8798	21.8798	21.8798	21.8798	0.500905	0.353553	0.74137	FALSE	Ack
FBtr0073212	28.4472	29.4891	28.4168	29.1565	28.935	28.8893	28.726	28.5461	0.81921	0.139157	0.103291	FALSE	Ras64B
FBtr0073213	23.1995	21.8798	21.8798	22.8473	24.7335	23.4688	21.1356	23.3516	0.557232	0.315849	-0.720828	FALSE	Akh
FBtr0073215;FBtr0332658	27.7214	27.3537	27.8892	26.9612	27.2738	26.8039	26.9008	26.7383	0.350819	0.642573	0.552191	FALSE	CG1299
FBtr0073217	22.879	24.1097	23.7513	23.5481	26.3009	23.3579	26.0711	25.9041	0.308125	0.66784	-1.83649	FALSE	Ero1L
FBtr0073218	21.8798	21.8798	21.8798	21.8798	24.0079	24.9978	23.0067	23.1936	0.0919372	0.809554	-1.92172	FALSE	CG18675
FBtr0073223	32.4047	32.3793	32.2362	32.8471	32.2497	32.4439	31.7329	32.2231	0.500905	0.492128	0.304447	FALSE	Cpr64Ad
FBtr0073226;FBtr0073225	29.2536	29.7475	29.7428	29.3151	29.9249	29.4231	29.4429	29.6602	0.725172	0.205599	-0.0980473	FALSE	CG14997
FBtr0073227	21.8798	21.8798	21.8798	21.8798	21.8798	21.8798	21.8798	21.8798	0.500905	0	0	FALSE	pav
FBtr0073228	23.6833	23.4994	23.5531	24.1613	23.7696	25.0869	25.6685	22.599	0.600891	0.287593	-0.55672	FALSE	CG1265
FBtr0073229	28.58	29.1085	28.9143	28.633	29.2759	29.2696	29.4602	29.3501	0.108566	0.79918	-0.529972	FALSE	CG1309
FBtr0073231	23	21.8798	21.8798	22.5709	21.8798	21.8798	21.8798	21.8798	0.500905	0.520925	0.452829	FALSE	CG1273
FBtr0073232;FBtr0333566	27.1218	27.3957	27.2301	27.2068	27.3244	26.8252	27.3951	27.8243	0.759296	0.182595	-0.10364	FALSE	CG1311
FBtr0073233	28.0408	28.1601	28.5732	28.4098	28.8809	29.0652	29.0577	28.9798	0.0380898	0.85409	-0.699919	FALSE	CG1316
FBtr0073234;FBtr0300449	21.8798	24.1944	21.8798	21.8798	21.8798	21.8798	21.8798	21.8798	0.500905	0.353553	0.57866	FALSE	TfIIEbeta
FBtr0333567;FBtr0300774;FBtr0073237;FBtr0073235	30.8768	30.9193	30.5932	30.3183	31.1648	31.0958	30.5175	30.8103	0.500905	0.377936	-0.220218	FALSE	Hexo1
FBtr0073242	27.1255	27.7077	27.7116	26.5084	27.1063	24.8901	26.5989	26.6141	0.500905	0.534328	0.960939	FALSE	CG11583
FBtr0333568;FBtr0073243	21.8798	21.8798	21.8798	21.8798	21.8798	21.8798	21.8798	21.8798	0.500905	0	0	FALSE	CG11586
FBtr0073247;FBtr0073246;FBtr0073245	21.8798	21.8798	21.8798	21.8798	21.8798	21.8798	21.8798	21.8798	0.500905	0	0	FALSE	ago
FBtr0333569;FBtr0073249;FBtr0073248;FBtr0073250	26.4045	26.1265	26.2103	25.6931	26.2976	26.0254	25.4647	25.2958	0.500905	0.414673	0.337719	FALSE	ImpL2
FBtr0073252	35.167	35.1231	35.0041	34.8636	35.1909	35.5388	34.6729	34.8575	0.940697	0.0482021	-0.0256047	FALSE	Cpr64Ac
FBtr0073253	28.8456	28.5998	28.8918	28.8545	28.4018	28.7665	28.2353	28.4517	0.294378	0.678264	0.334082	FALSE	Cpr64Ab
FBtr0073254	35.7839	35.6634	35.6495	35.629	36.0548	36.2865	35.5375	35.7639	0.500905	0.455878	-0.229244	FALSE	Cpr64Aa
FBtr0073256	23.4013	22.3443	21.8798	23.3233	23.5689	23.4135	25.4242	25.2735	0.294961	0.677027	-1.68286	FALSE	VhaM9.7-c
FBtr0332659;FBtr0073260	23.8111	23.7881	23.3012	23.5109	24.2371	24.381	22.5819	21.8798	0.736565	0.19742	0.332851	FALSE	mas
FBtr0310632;FBtr0073263	30.3013	30.8244	30.5232	30.8278	31.1799	31.0799	31.2801	30.7987	0.25163	0.707094	-0.465458	FALSE	Rop
FBtr0073264	24.631	24.747	21.8798	21.8798	25.2284	21.8798	21.8798	21.8798	0.75956	0.18232	0.567461	FALSE	RfC4
FBtr0073270;FBtr0310531	33.7017	33.4647	33.6203	33.5921	33.3139	33.1442	33.4844	33.3723	0.222019	0.732249	0.26599	FALSE	Chd64
FBtr0073273;FBtr0073272;FBtr0073271;FBtr0302304	23.8694	23.8939	24.7929	22.8738	21.8798	24.4649	22.9813	24.6186	0.758656	0.183145	0.371369	FALSE	CG14995
FBtr0332980;FBtr0073277;FBtr0073276;FBtr0073275	32.0024	31.5259	31.6487	32.2039	32.0938	31.9949	32.0586	31.9587	0.500905	0.393792	-0.181273	FALSE	Gad1
FBtr0073278	30.1484	29.8114	30.0955	29.9739	30.0245	30.2779	29.6873	29.8281	0.824621	0.1347	0.0528693	FALSE	Faa
FBtr0332981;FBtr0073281	21.8798	21.8798	21.8798	21.8798	26.0877	26.4941	25.6386	26.3859	4.37893e-05	0.929833	-4.27183	TRUE	Dpy-30L2
FBtr0310046;FBtr0309791;FBtr0073284;FBtr0073283	30.23	29.5804	30.2273	30.1424	29.6426	29.9582	29.9297	29.8446	0.500905	0.403702	0.201215	FALSE	CG11594
FBtr0346538;FBtr0073286	21.8798	21.8798	21.8798	21.8798	21.8798	21.8798	21.8798	21.8798	0.500905	0	0	FALSE	Claspin
FBtr0306092;FBtr0073287	26.5444	26.6014	26.7685	27.0515	26.7448	26.8017	27.7577	27.2913	0.500905	0.499967	-0.407399	FALSE	CG32250
FBtr0306093;FBtr0073288	30.4862	30.0895	30.4064	30.4129	30.1793	29.9014	30.0928	29.8735	0.239763	0.717027	0.337008	FALSE	mRpS6
FBtr0073293;FBtr0330179	23.7402	21.8798	21.8798	23.9059	21.8798	23.6712	21.8798	23.7845	0.972069	0.0234368	0.0475928	FALSE	Syx17
FBtr0113140;FBtr0073296;FBtr0073295;FBtr0073294;FBtr0308034;FBtr0308033;FBtr0113141;FBtr0073297	24.5912	23.8434	24.3037	23.1316	21.8798	21.8798	22.9379	25.035	0.500905	0.432854	1.03436	FALSE	DOR
FBtr0073299	21.8798	21.8798	21.8798	21.8798	23.8621	23.3639	24.7229	24.6467	0.0152425	0.882357	-2.26911	FALSE	nAChRbeta1
FBtr0333964;FBtr0290123;FBtr0073302	21.8798	21.8798	21.8798	21.8798	21.8798	21.8798	21.8798	21.8798	0.500905	0	0	FALSE	CG12607
FBtr0304987;FBtr0113143;FBtr0113142;FBtr0073310	21.8798	21.8798	21.8798	21.8798	21.8798	21.8798	21.8798	21.8798	0.500905	0	0	FALSE	CG11357
FBtr0073317	28.5704	29.4268	28.9418	28.693	29.5694	28.8066	29.0668	29.1862	0.500905	0.356274	-0.249276	FALSE	Rpd3
FBtr0304990;FBtr0304989;FBtr0302594;FBtr0100508;FBtr0100507;FBtr0100505;FBtr0100504;FBtr0073321;FBtr0343995	25.6237	26.2062	25.3611	23.1159	25.867	26.4122	26.6421	26.225	0.500905	0.541053	-1.20983	FALSE	Src64B
FBtr0073322	21.8798	21.8798	21.8798	21.8798	21.8798	26.8248	26.5123	25.6535	0.239569	0.717497	-3.33782	FALSE	CG32243
FBtr0073333	21.8798	21.8798	21.8798	21.8798	21.8798	21.8798	21.8798	21.8798	0.500905	0	0	FALSE	CG15022
FBtr0113139;FBtr0073335	23.0972	21.8798	21.8798	23.369	21.8798	21.8798	21.8798	24.9731	0.948286	0.0424746	-0.0966632	FALSE	CG15019
FBtr0073338	23.7217	21.8798	21.8798	24.565	21.8798	21.8798	21.8798	21.8798	0.500905	0.527984	1.13178	FALSE	CG11342
FBtr0073340	27.5505	27.511	27.4722	27.5662	27.6984	27.3203	27.5443	27.3874	0.788165	0.161473	0.0373892	FALSE	CG15014
FBtr0073343;FBtr0073342;FBtr0073341	24.2313	21.8798	21.8798	21.8798	21.8798	21.8798	21.8798	21.8798	0.500905	0.353553	0.587881	FALSE	dyl
FBtr0073348	27.7554	28.0675	27.6788	27.6167	28.2668	26.8969	27.9517	28.1718	0.940367	0.0485899	-0.0421448	FALSE	Aats-leu
FBtr0332742;FBtr0073363	21.8798	21.8798	21.8798	21.8798	27.7205	27.2602	27.5688	27.6451	5.0304e-07	0.934524	-5.66887	TRUE	CG12493
FBtr0073366	22.7918	23.5075	24.9572	22.9935	21.8798	23.2541	22.7895	26.0065	0.963775	0.0301168	0.0800078	FALSE	CG18418
FBtr0073367	21.8798	21.8798	21.8798	21.8798	21.8798	21.8798	21.8798	21.8798	0.500905	0	0	FALSE	CG7514
FBtr0309972;FBtr0073375	23.4885	25.5492	21.8798	21.8798	24.7553	26.0019	22.7212	24.7445	0.500905	0.419449	-1.35639	FALSE	Con
FBtr0343639;FBtr0112977;FBtr0112976;FBtr0112975;FBtr0073376	27.5957	28.5178	27.8405	27.9731	28.4468	27.4222	22.7949	22.6555	0.500905	0.54008	2.65193	FALSE	CG15211
FBtr0073378	26.174	21.8798	25.0337	21.8798	21.8798	21.8798	21.8798	21.8798	0.500905	0.531816	1.86204	FALSE	CG15209
FBtr0073379	29.5205	28.9698	29.3385	29.7342	29.1285	29.6529	29.7078	29.5588	0.709724	0.215999	-0.121261	FALSE	CG17333
FBtr0332961;FBtr0073381	21.8798	21.8798	21.8798	21.8798	23.1919	26.0252	23.4527	22.9842	0.2471	0.710755	-2.03374	FALSE	CG2186
FBtr0073386	23.4793	25.8729	26.213	25.5085	26.2251	25.9648	21.8798	26.0263	0.902661	0.0765379	0.24447	FALSE	v
FBtr0343591;FBtr0073387	31.1231	31.0541	30.8907	30.8728	30.4383	30.5553	30.1661	30.4715	0.0371528	0.855468	0.577386	FALSE	CG2145
FBtr0073390;FBtr0331720;FBtr0073391	25.9566	24.3738	23.8377	24.3598	21.8798	23.9288	25.0854	24.5001	0.529145	0.33467	0.783464	FALSE	CG11160
FBtr0346297;FBtr0073392	26.1799	26.282	26.544	26.505	26.3379	23.7567	21.8798	24.8779	0.357418	0.639146	2.16464	FALSE	CG15203
FBtr0073394	23.4717	23.796	23.6108	23.555	26.2647	25.6745	21.8798	27.1653	0.500905	0.46553	-1.63768	FALSE	CG1537
FBtr0339768;FBtr0073403	21.8798	24.4694	21.8798	21.8798	23.2058	21.8798	23.1612	25.4526	0.542026	0.326137	-0.897657	FALSE	CG1582
FBtr0346304;FBtr0073405;FBtr0073404;FBtr0343584	21.8798	21.8798	21.8798	21.8798	21.8798	21.8798	21.8798	21.8798	0.500905	0	0	FALSE	Ork1
FBtr0073406;FBtr0339836	21.8798	21.8798	21.8798	21.8798	21.8798	21.8798	21.8798	21.8798	0.500905	0	0	FALSE	CG1637
FBtr0073407	29.6224	29.0658	28.8343	29.4664	28.35	29.3787	29.1961	28.9484	0.514896	0.343956	0.278923	FALSE	CG1637
FBtr0346382;FBtr0073408	26.5195	22.9661	23.1998	21.8798	25.3303	26.1797	22.4472	26.3582	0.500905	0.372895	-1.43755	FALSE	CG1637
FBtr0073410	23.4183	22.2143	23.7459	24.1755	21.8798	21.8798	21.8798	21.8798	0.149599	0.77227	1.50874	FALSE	feo
FBtr0073411	25.8775	25.3205	25.1488	24.447	26.1656	23.4044	26.9375	26.2895	0.70078	0.22194	-0.500799	FALSE	sbr
FBtr0073412	21.8798	21.8798	21.8798	21.8798	21.8798	21.8798	21.8798	21.8798	0.500905	0	0	FALSE	CG32669
FBtr0346384;FBtr0073423;FBtr0073421;FBtr0073424;FBtr0073422	35.4675	35.9456	35.7103	35.8436	35.9511	35.7801	35.9968	35.9725	0.500905	0.512027	-0.183359	FALSE	sesB
FBtr0333963;FBtr0073426;FBtr0073425	21.8798	21.8798	21.8798	21.8798	28.253	27.9736	28.2889	28.5068	4.26972e-07	0.934589	-6.37581	TRUE	Ant2
FBtr0346279;FBtr0073427	22.7098	22.8949	26.5986	27.0458	27.5021	25.1819	23.5737	21.8798	0.921642	0.0633972	0.277906	FALSE	Vago
FBtr0346280;FBtr0073428	21.8798	21.8798	25.8528	25.8956	21.8798	25.4797	26.7473	27.1725	0.562975	0.311894	-1.44281	FALSE	CG2076
FBtr0332383;FBtr0073431;FBtr0073429	26.5819	25.8942	25.6924	25.9052	26.6214	26.6863	26.9363	27.6477	0.214048	0.736845	-0.954509	FALSE	CG2061
FBtr0073435;FBtr0073434	34.3828	34.3871	34.1499	34.2984	34.3249	34.3715	34.1338	34.0044	0.527162	0.335877	0.095893	FALSE	Hsp60
FBtr0346274;FBtr0073436	32.2997	32.3216	32.3606	32.1334	32.2367	31.9351	31.9541	32.1091	0.301076	0.672536	0.220083	FALSE	Rpt3
FBtr0073437;FBtr0330387	21.8798	21.8798	21.8798	21.8798	23.764	21.8798	21.8798	21.8798	0.500905	0.353553	-0.471056	FALSE	CG18292
FBtr0307187;FBtr0073438	21.8798	21.8798	21.8798	21.8798	21.8798	21.8798	24.1544	22.8135	0.500905	0.486385	-0.802089	FALSE	CG15202
FBtr0073439	28.4365	27.7662	28.2108	28.7518	27.7357	27.9654	27.7894	28.0973	0.500905	0.547281	0.394376	FALSE	CG15201
FBtr0343038;FBtr0073440;FBtr0331741;FBtr0331740	21.8798	21.8798	21.8798	21.8798	21.8798	21.8798	21.8798	21.8798	0.500905	0	0	FALSE	Lint-1
FBtr0073443;FBtr0073441;FBtr0073444	29.1872	29.5329	29.187	29.1382	29.3223	28.9027	29.1358	29.1749	0.500905	0.356839	0.127384	FALSE	Dlic
FBtr0073448	23.6035	24.7711	21.8798	23.2638	22.798	21.8798	22.7608	25.5673	0.939849	0.0489665	0.128079	FALSE	CG1657
FBtr0073451	21.8798	21.8798	21.8798	21.8798	21.8798	21.8798	21.8798	21.8798	0.500905	0	0	FALSE	CG1738
FBtr0073452	24.8041	29.8278	29.3551	29.6471	29.4545	29.652	28.5415	29.2637	0.665789	0.245577	-0.819389	FALSE	CG11752
FBtr0340050;FBtr0340049;FBtr0073453	27.2115	26.7403	26.952	27.1528	26.711	26.6943	26.9297	27.082	0.500905	0.391634	0.159927	FALSE	CG1737
FBtr0073454	24.9005	23.1931	22.886	21.6848	23.2361	24.4905	23.5965	24.6077	0.500905	0.382634	-0.816583	FALSE	dsh
FBtr0073457	23.7691	21.8798	22.9751	23.4698	24.0998	23.4835	22.4611	21.8798	0.970727	0.0249358	0.0423859	FALSE	hop
FBtr0073460	26.8	25.7784	26.3727	26.441	21.8798	25.5987	23.8979	23.3096	0.180612	0.75536	2.67652	FALSE	l(1)10Bb
FBtr0073468	27.4891	25.3537	27.3387	27.5443	24.4883	27.458	27.6361	27.3926	0.900811	0.0776379	0.18768	FALSE	antdh
FBtr0340165;FBtr0340164;FBtr0073472;FBtr0073471	31.5149	31.8658	31.7972	32.1515	31.8965	31.9892	32.1177	31.5515	0.846187	0.11971	-0.0563441	FALSE	Ran
FBtr0073474	28.2039	27.5757	27.8062	28.314	27.3451	27.3626	26.9417	27.4654	0.179884	0.755899	0.696248	FALSE	ssp7
FBtr0346270;FBtr0073479;FBtr0073478;FBtr0073477;FBtr0073476;FBtr0073475	27.7432	28.4338	28.3173	27.5789	28.7202	28.2489	28.7807	28.6936	0.323192	0.659738	-0.592542	FALSE	Klp10A
FBtr0073480	28.8961	29.3241	29.3782	29.481	29.4979	29.4846	29.5696	29.4679	0.500905	0.553775	-0.235188	FALSE	Gtp-bp
FBtr0343640;FBtr0073482	29.4431	29.2728	29.3055	29.5036	29.3089	29.1116	28.9964	28.8843	0.244991	0.713134	0.305976	FALSE	Tim8
FBtr0333262;FBtr0073486;FBtr0308088;FBtr0333261;FBtr0301289;FBtr0073487;FBtr0073485;FBtr0308089;FBtr0073489	26.3822	22.6369	25.7279	26.0154	26.1492	24.435	23.8604	23.9298	0.705869	0.218652	0.597	FALSE	dlg1
FBtr0073494	26.3554	25.6056	26.0466	26.4438	24.7002	25.0156	25.5724	24.4801	0.122877	0.789732	1.17081	FALSE	Gs2
FBtr0073499;FBtr0073500;FBtr0332619	21.8798	21.8798	21.8798	21.8798	21.8798	21.8798	21.8798	21.8798	0.500905	0	0	FALSE	HP5
FBtr0346268;FBtr0073503	26.7747	27.3714	28.1606	25.8371	27.3564	27.0355	27.6659	27.7968	0.584102	0.298384	-0.427702	FALSE	Cyp4g15
FBtr0073505	29.6279	29.2376	29.3796	29.7708	29.1382	29.4709	29.4517	29.2401	0.500905	0.42046	0.178767	FALSE	CG1749
FBtr0340294;FBtr0340293;FBtr0073506	29.5052	29.9131	29.813	29.72	30.1264	30.4188	30.4922	30.367	0.0451795	0.846627	-0.613296	FALSE	Spase25
FBtr0340296;FBtr0073509	21.8798	21.8798	21.8798	21.8798	23.7453	21.8798	21.8798	21.8798	0.500905	0.353553	-0.466378	FALSE	PGRP-SA
FBtr0073510	23.6056	24.1661	25.7644	22.0695	23.1962	25.9352	24.4809	23.5223	0.809225	0.147188	-0.382287	FALSE	CG11699
FBtr0073519;FBtr0073518	23.1558	23.2082	22.4381	21.932	22.8711	24.6779	21.8798	21.8798	0.904177	0.0751755	-0.143617	FALSE	rho-4
FBtr0343647;FBtr0073520	28.0504	28.4164	27.9426	28.1307	28.3743	28.1264	27.7305	28.3753	0.958048	0.0346156	-0.0165811	FALSE	CG1703
FBtr0331406;FBtr0273235;FBtr0073522;FBtr0330394;FBtr0330393;FBtr0330392	23.9291	24.0443	23.7915	24.4141	21.8798	21.8798	21.8798	21.8798	0.00025718	0.924921	2.16499	TRUE	Ptp10D
FBtr0334463;FBtr0073526;FBtr0334464;FBtr0073527;FBtr0334465	23.4063	22.9705	23.7349	25.5265	21.8798	26.513	23.0987	21.8798	0.772472	0.172846	0.566723	FALSE	bif
FBtr0346275;FBtr0073531	27.4628	26.6657	27.5658	27.5377	24.0301	26.7549	26.9412	27.1184	0.500905	0.473998	1.09684	FALSE	CG2444
FBtr0073533;FBtr0073534;FBtr0073532	22.8422	25.3854	21.8798	21.8798	21.8798	22.2273	21.8798	21.8798	0.500905	0.421801	1.03014	FALSE	CG2371
FBtr0343586;FBtr0073535	26.3954	27.675	26.9534	26.4171	27.3105	26.4605	24.6105	26.0031	0.500905	0.410074	0.764086	FALSE	RPA3
FBtr0306135;FBtr0306133;FBtr0073536;FBtr0306134	21.8798	21.8798	21.8798	21.8798	21.8798	22.6423	25.6579	21.8798	0.500905	0.428552	-1.13516	FALSE	CG2247
FBtr0073539	29.3721	28.798	29.3121	28.9762	28.5332	28.6555	28.5073	28.8514	0.229476	0.727295	0.477724	FALSE	CG1561
FBtr0073542	26.7895	26.711	26.7053	26.9937	25.4846	24.4561	27.2712	26.9413	0.500905	0.399472	0.761535	FALSE	RpII215
FBtr0339694;FBtr0339693;FBtr0073544;FBtr0073543	24.1238	29.5072	28.3193	28.6254	24.0404	28.971	29.5535	28.922	0.939843	0.0494023	-0.227789	FALSE	CG1572
FBtr0332620;FBtr0300732;FBtr0073546;FBtr0300733;FBtr0073547	21.8798	21.8798	24.0826	23.9482	21.8798	21.8798	21.8798	24.2461	0.722451	0.207443	0.476225	FALSE	Evi5
FBtr0303335;FBtr0303334;FBtr0073551;FBtr0332954	31.9356	31.779	31.6844	31.8717	31.8163	31.6528	31.6992	31.7703	0.500905	0.428172	0.0830013	FALSE	prtp
FBtr0332955;FBtr0073553;FBtr0073552	21.8798	21.8798	21.8798	21.8798	21.8798	21.8798	23.619	23.9271	0.500905	0.537693	-0.946633	FALSE	Tango10
FBtr0073555	21.8798	21.8798	21.8798	21.8798	21.8798	21.8798	21.8798	21.8798	0.500905	0	0	FALSE	m
FBtr0073562;FBtr0307896;FBtr0299569;FBtr0100540;FBtr0073561;FBtr0073560;FBtr0073558;FBtr0308085;FBtr0308084;FBtr0333204	29.7951	29.8524	29.7351	29.9952	29.9546	29.7949	30.2056	29.9574	0.500905	0.443148	-0.133681	FALSE	CkIIbeta
FBtr0333016;FBtr0073565	25.7462	21.8798	22.8982	26.6051	25.1803	22.9505	25.7949	25.75	0.760303	0.181878	-0.636579	FALSE	Cyp28c1
FBtr0073567;FBtr0330413	22.7162	21.8798	24.5494	23.3749	25.3601	24.094	23.6148	25.3019	0.425146	0.600442	-1.46265	FALSE	CG1847
FBtr0331588;FBtr0073569	23.7241	26.2938	23.5959	21.8798	27.3167	24.1713	27.1603	25.7586	0.473281	0.574759	-2.2283	FALSE	CG15739
FBtr0346165;FBtr0073572	28.8648	28.8058	29.1346	29.1977	28.3175	28.8399	29.2057	28.9134	0.561308	0.312895	0.181601	FALSE	sicily
FBtr0342742;FBtr0342743;FBtr0073573	21.8798	21.8798	21.8798	21.8798	21.8798	21.8798	21.8798	21.8798	0.500905	0	0	FALSE	wisp
FBtr0073577;FBtr0073576;FBtr0073575;FBtr0073578	35.0614	34.9926	34.9364	34.8667	35.1515	35.125	34.9555	34.993	0.500905	0.475665	-0.0919387	FALSE	regucalcin
FBtr0342733;FBtr0073580	24.738	24.1496	23.9838	24.9173	25.7584	23.9756	21.8798	24.1579	0.694805	0.225941	0.504271	FALSE	fw
FBtr0073581	21.8798	23.7102	21.8798	21.8798	21.8798	21.8798	21.8798	21.8798	0.500905	0.353553	0.457601	FALSE	CG18130
FBtr0073591;FBtr0331748;FBtr0302182	30.7533	30.3067	30.7143	31.1547	29.8123	29.8459	29.9527	29.9571	0.0634359	0.831106	0.840245	FALSE	Sclp
FBtr0305609;FBtr0073595;FBtr0073594	27.6213	27.4685	27.1746	27.3866	27.1857	26.6579	27.2754	27.2101	0.462058	0.580689	0.330505	FALSE	pot
FBtr0342744;FBtr0073596	27.1178	26.5286	27.5094	25.6668	27.6135	27.8426	28.2331	28.3799	0.236067	0.724301	-1.31163	FALSE	Upf1
FBtr0073601	28.7084	29.3193	29.2552	28.7808	30.1381	29.8405	30.2613	30.3453	0.0299252	0.863181	-1.13035	FALSE	CG2025
FBtr0073603;FBtr0073602	22.9947	25.5899	25.465	21.8798	25.5601	22.1764	26.2392	27.4547	0.526764	0.33611	-1.37524	FALSE	CG10347
FBtr0334455;FBtr0073604	28.2365	27.729	28.6816	28.2709	28.2285	29.763	29.0787	28.6299	0.500905	0.557633	-0.695492	FALSE	p24-1
FBtr0345160;FBtr0339749;FBtr0073607	27.044	27.2408	27.9894	27.8421	27.6116	26.6487	27.0669	27.718	0.600775	0.287693	0.267774	FALSE	CG1578
FBtr0345166;FBtr0073611;FBtr0073610;FBtr0073609;FBtr0073608	34.565	34.2686	34.3548	34.4195	34.1852	34.5457	34.2307	34.2944	0.564028	0.310996	0.0879515	FALSE	Hsc70-3
FBtr0073612	24.0977	24.6339	26.6009	24.6427	23.411	24.3491	26.4607	21.8798	0.558125	0.315157	0.968642	FALSE	dy
FBtr0073613	28.7606	29.2936	28.9607	28.445	28.8721	28.5542	28.4403	27.8847	0.500905	0.50479	0.427178	FALSE	CG9360
FBtr0345164;FBtr0333797;FBtr0333796;FBtr0303339;FBtr0303338;FBtr0303337;FBtr0303336;FBtr0073619;FBtr0073618;FBtr0073617;FBtr0073616;FBtr0073615	25.928	25.1773	26.7932	27.0781	27.6255	26.523	27.2031	26.9078	0.500905	0.527653	-0.820714	FALSE	Amun
FBtr0073620	21.8798	21.8798	21.8798	21.8798	21.8798	23.4174	24.4395	25.5301	0.308557	0.667437	-1.93692	FALSE	FucT6
FBtr0073621	22.7792	23.8108	23.0216	23.3121	24.5648	23.7298	22.0099	23.0835	0.903437	0.0758133	-0.116105	FALSE	CG15735
FBtr0073622	25.5286	26.0049	25.77	26.05	25.3253	25.7532	25.4514	22.7519	0.500905	0.474689	1.01792	FALSE	Tango4
FBtr0073623	21.8798	24.0336	24.8819	22.9132	21.8798	24.8554	23.9172	22.8947	0.978895	0.0167913	0.0403339	FALSE	Cyp318a1
FBtr0073640	23.9839	26.6176	25.9222	23.7557	25.8614	26.0405	23.6655	25.7778	0.856911	0.111856	-0.266425	FALSE	Cyp311a1
FBtr0073641;FBtr0342732	29.6282	30.1733	30.1979	29.9603	30.2443	30.1788	30.2619	30.5494	0.425146	0.6005	-0.318694	FALSE	Usp7
FBtr0339625;FBtr0073642	21.8798	21.8798	21.8798	21.8798	21.8798	21.8798	21.8798	21.8798	0.500905	0	0	FALSE	Chrac-16
FBtr0073650	21.8798	21.8798	21.8798	21.8798	21.8798	21.8798	21.8798	21.8798	0.500905	0	0	FALSE	Cpr11A
FBtr0073651	32.7676	33.2427	33.3875	32.2327	32.6834	33.0378	31.6594	32.1071	0.500905	0.447346	0.535736	FALSE	Lsp1alpha
FBtr0073652	21.8798	21.8798	21.8798	21.8798	21.8798	21.8798	21.8798	21.8798	0.500905	0	0	FALSE	CG2556
FBtr0073653;FBtr0333157	23.4503	23.3174	24.059	23.8295	23.7533	23.3565	22.4463	22.5628	0.500905	0.548242	0.634321	FALSE	Cpr11B
FBtr0346308;FBtr0073655	21.8798	23.4667	21.8798	21.8798	21.8798	25.0824	21.6252	22.3336	0.746738	0.190434	-0.453736	FALSE	CG2543
FBtr0346381;FBtr0310434;FBtr0073657	21.8798	21.8798	21.8798	21.8798	21.8798	21.8798	21.8798	21.8798	0.500905	0	0	FALSE	CG1463
FBtr0073658	27.3907	27.6581	27.1499	27.0571	27.8496	27.4193	28.305	27.9796	0.302775	0.671514	-0.574411	FALSE	CG1824
FBtr0331718;FBtr0073662;FBtr0273245	21.8798	21.8798	21.8798	21.8798	21.8798	21.8798	21.8798	21.8798	0.500905	0	0	FALSE	CG11138
FBtr0073670	21.8798	21.8798	21.8798	21.8798	21.8798	21.8798	21.8798	21.8798	0.500905	0	0	FALSE	CG15731
FBtr0073675	21.8798	21.8798	21.8798	21.8798	21.8798	21.8798	21.8798	21.8798	0.500905	0	0	FALSE	CG2540
FBtr0307899;FBtr0300375;FBtr0073678;FBtr0307900;FBtr0307898;FBtr0340407;FBtr0340406	25.9342	21.6488	24.0131	22.8718	23.8109	24.4677	26.0005	26.3509	0.500905	0.465992	-1.54054	FALSE	Tomosyn
FBtr0345163;FBtr0345162;FBtr0340408;FBtr0300380;FBtr0073682;FBtr0073680	29.8571	29.748	30.0291	30.0135	29.9418	29.9969	30.3342	30.0162	0.500905	0.474616	-0.160352	FALSE	CkIalpha
FBtr0345165;FBtr0333756;FBtr0073683	21.8798	21.8798	21.8798	21.8798	21.8798	21.8798	21.8798	21.8798	0.500905	0	0	FALSE	Tis11
FBtr0305591;FBtr0073690	25.787	25.8145	25.7894	23.8661	21.8798	23.8109	25.5795	25.5347	0.500905	0.386755	1.11303	FALSE	CG3775
FBtr0343185;FBtr0073691	29.0212	28.654	23.9674	29.1955	28.0721	28.5147	28.2948	28.2602	0.77363	0.172161	-0.575959	FALSE	mRpL49
FBtr0346316;FBtr0343649;FBtr0073692	21.8798	21.8798	21.8798	21.8798	21.8798	21.8798	21.8798	21.8798	0.500905	0	0	FALSE	CG4645
FBtr0073693	21.8798	21.8798	21.8798	21.8798	21.8798	21.8798	21.8798	21.8798	0.500905	0	0	FALSE	Brms1
FBtr0073694	22.38	22.7329	24.2135	21.8798	21.8798	21.8798	21.8798	21.8798	0.494939	0.560975	0.921787	FALSE	CG4404
FBtr0073696;FBtr0073695	21.8798	23.3416	25.3051	21.8798	23.7184	24.3776	23.267	21.8798	0.895989	0.0821599	-0.209146	FALSE	CG4407
FBtr0073697	28.6589	29.4585	28.9852	28.9571	29.1954	28.9807	29.4294	28.9756	0.668641	0.243586	-0.13031	FALSE	CG32649
FBtr0073705;FBtr0333799	32.2099	32.3623	32.2652	32.3849	32.3938	32.6482	32.653	32.6233	0.139529	0.77811	-0.273966	FALSE	ade5
FBtr0346122;FBtr0073709	21.8798	21.8798	21.8798	21.8798	21.8798	21.8798	21.8798	21.8798	0.500905	0	0	FALSE	Aven
FBtr0333320;FBtr0333319;FBtr0308694;FBtr0306738;FBtr0113493;FBtr0073712	21.8798	21.8798	21.8798	22.8529	21.8798	24.6677	21.8798	23.4537	0.500905	0.405485	-0.847176	FALSE	fne
FBtr0073720	28.8287	29.2502	28.7668	29.0414	29.4625	27.4994	29.0727	28.719	0.675639	0.238649	0.283362	FALSE	lic
FBtr0340301;FBtr0073721	31.4089	30.8119	30.9106	30.934	30.7447	30.9246	30.5616	30.6128	0.457029	0.583721	0.305433	FALSE	CG2200
FBtr0340302;FBtr0073722	21.8798	21.8798	23.9004	23.6433	25.0899	23.838	25.9802	25.8666	0.202511	0.743563	-2.36786	FALSE	CG42237
FBtr0344608;FBtr0339676;FBtr0073723	29.5784	29.6046	29.8869	29.2147	29.3428	29.3013	29.1462	29.3529	0.457029	0.583717	0.285366	FALSE	CG15717
FBtr0073726	21.8798	21.8798	21.8798	21.8798	21.8798	23.1102	21.8798	23.883	0.500905	0.520607	-0.808416	FALSE	CG4332
FBtr0340299;FBtr0340298;FBtr0073727	27.4496	27.5422	27.6706	27.6153	27.9621	28.2805	28.4368	28.5516	0.0397049	0.852062	-0.738306	FALSE	CG12096
FBtr0073729;FBtr0073728	24.5576	21.8798	21.8798	24.6772	22.851	21.8798	21.8798	24.2005	0.717627	0.210946	0.545845	FALSE	CG32641;CG32640
FBtr0310646;FBtr0073730	31.2769	31.2226	31.2416	31.3682	31.3249	31.1631	31.2346	31.3766	0.978497	0.0170581	0.0025629	FALSE	REG
FBtr0073731;FBtr0310648;FBtr0330398;FBtr0073732;FBtr0310647;FBtr0340190	26.9722	21.8798	26.7012	26.5805	27.1978	26.7146	27.1451	26.429	0.500905	0.378609	-1.33821	FALSE	mew
FBtr0346125;FBtr0346124;FBtr0073737	23.9226	24.2457	26.4493	26.5445	26.7792	23.5383	27.2283	26.7376	0.644544	0.259722	-0.780302	FALSE	CG2453
FBtr0073738	21.8798	24.0247	21.8798	21.8798	24.0962	21.8798	21.8798	23.4624	0.735284	0.198425	-0.413551	FALSE	CG12723
FBtr0073741	28.6779	27.6295	28.5127	27.9725	27.7214	28.0201	27.2185	27.9768	0.500905	0.494456	0.463912	FALSE	Bap60
FBtr0340303;FBtr0330396;FBtr0073747;FBtr0330397;FBtr0073748	21.8798	21.8798	21.8798	21.8798	21.8798	21.8798	21.8798	21.8798	0.500905	0	0	FALSE	hep
FBtr0343602;FBtr0073750	21.8798	21.8798	21.8798	21.8798	21.8798	21.8798	21.8798	21.8798	0.500905	0	0	FALSE	CG12715
FBtr0333329;FBtr0073754	29.8742	30.5752	30.4033	29.9066	31.1843	31.1462	31.4388	31.2071	0.0356662	0.856831	-1.05424	FALSE	comt
FBtr0346123;FBtr0333330;FBtr0073755	21.8798	21.8798	23.3052	21.8798	21.8798	25.4191	21.8798	24.7733	0.500905	0.424595	-1.25184	FALSE	CG15743
FBtr0073756	21.8798	21.8798	21.8798	21.8798	21.8798	21.8798	21.8798	21.8798	0.500905	0	0	FALSE	CG15744
FBtr0073757	21.8798	21.8798	23.5025	21.8798	21.8798	24.8425	24.9666	22.5623	0.500905	0.474533	-1.27733	FALSE	CG1622
FBtr0345161;FBtr0339700;FBtr0339699;FBtr0073764;FBtr0073763	33.2931	33.2415	33.3415	33.248	33.4257	33.3288	33.19	33.2826	0.765167	0.17821	-0.0257813	FALSE	Jafrac1
FBtr0339837;FBtr0073774;FBtr0073773;FBtr0073772;FBtr0073771;FBtr0073770;FBtr0073769	33.4188	33.1669	33.3282	33.5606	33.0573	33.0574	33.0057	33.0745	0.126802	0.787191	0.319917	FALSE	CG1640
FBtr0343147;FBtr0073775	29.314	29.0352	29.1512	29.3783	29.0763	28.2722	28.5755	28.95	0.303962	0.670979	0.501199	FALSE	Tim9a
FBtr0073777	21.8798	21.8798	23.8626	26.1036	24.4278	25.4258	23.4209	21.8798	0.86251	0.107633	-0.357111	FALSE	CG1673
FBtr0073778	30.7072	30.5796	30.5411	30.7934	30.3961	30.8285	30.324	30.2904	0.500905	0.469063	0.19554	FALSE	GstT4
FBtr0301559;FBtr0073779	21.8798	23.2309	21.8798	21.8798	21.8798	21.8798	21.8798	21.8798	0.500905	0.353553	0.337769	FALSE	Set2
FBtr0073782	21.8798	21.8798	21.8798	21.8798	21.8798	21.8798	21.8798	21.8798	0.500905	0	0	FALSE	CG15754
FBtr0073783	21.8798	21.8798	21.8798	21.8798	21.8798	21.8798	21.8798	21.8798	0.500905	0	0	FALSE	CG15756
FBtr0073784	21.8798	21.8798	21.8798	21.8798	21.8798	21.8798	21.8798	21.8798	0.500905	0	0	FALSE	Cpr12A
FBtr0100168;FBtr0073789	25.2205	22.449	25.8512	26.3142	25.7826	25.9438	25.6077	25.8231	0.521154	0.340079	-0.830578	FALSE	Yippee
FBtr0339838;FBtr0073790;FBtr0304001	23.4015	24.8469	24.5277	23.9637	26.3062	23.6032	22.0682	26.6469	0.797132	0.155087	-0.471192	FALSE	Rbp1-like
FBtr0300828;FBtr0073795;FBtr0073794;FBtr0073793;FBtr0073792	31.4918	32.354	31.6952	30.8062	31.7397	30.7757	31.8555	31.571	0.877322	0.0959435	0.101325	FALSE	RpS15Aa
FBtr0339946;FBtr0073796	23.8928	23.1239	23.6607	23.3508	22.8924	21.8798	21.8798	23.8236	0.500905	0.551428	0.888158	FALSE	CG1764
FBtr0073799	23.7908	26.0492	25.7448	21.8798	26.4213	26.1948	24.6764	26.0457	0.500905	0.46543	-1.46841	FALSE	CG32631
FBtr0310431;FBtr0073800	27.9671	26.7551	27.6529	26.5276	26.4519	25.2655	25.5668	26.8939	0.354967	0.640363	1.18113	FALSE	CG32633
FBtr0333723;FBtr0310432;FBtr0113443;FBtr0310433;FBtr0073803;FBtr0330399	25.4501	23.3354	25.8951	25.7385	23.9892	23.183	24.4994	23.6594	0.46356	0.57946	1.27207	FALSE	Tango13
FBtr0073806	21.8798	21.8798	21.8798	21.8798	21.8798	21.8798	21.8798	21.8798	0.500905	0	0	FALSE	BthD
FBtr0340397;FBtr0073809	21.8798	21.8798	21.8798	21.8798	21.8798	21.8798	21.8798	21.8798	0.500905	0	0	FALSE	CG11164
FBtr0073811	21.8798	21.8798	21.8798	21.8798	21.8798	21.8798	21.8798	21.8798	0.500905	0	0	FALSE	CG11162
FBtr0073812	27.1422	27.6792	27.4517	25.8646	27.409	27.5683	28.0855	26.314	0.719774	0.209466	-0.309765	FALSE	CG11158
FBtr0073817	21.8798	21.8798	21.8798	21.8798	21.8798	21.8798	21.8798	21.8798	0.500905	0	0	FALSE	mus101
FBtr0331708;FBtr0073818	29.1415	29.1394	29.3332	29.2102	29.0101	28.6489	29.0354	29.1122	0.36708	0.633672	0.254433	FALSE	CG11134
FBtr0331719;FBtr0073819	31.9945	31.8009	31.88	32.3538	31.7166	32.6051	31.4615	31.6168	0.72479	0.205827	0.157277	FALSE	CG11151
FBtr0073820	21.8798	21.8798	21.8798	21.8798	21.8798	21.8798	24.3958	21.8798	0.500905	0.353553	-0.629005	FALSE	Rtc1
FBtr0346090;FBtr0073821	30.4308	30.8044	29.7785	30.1988	31.499	30.7866	29.856	29.8706	0.781726	0.166459	-0.199933	FALSE	Yp3
FBtr0301534;FBtr0301532;FBtr0301533;FBtr0073823;FBtr0100195;FBtr0100194;FBtr0073822;FBtr0301535;FBtr0331716;FBtr0340289;FBtr0331717	26.3205	26.9873	27.0984	26.0228	26.6339	26.247	26.7995	27.2248	0.822622	0.136552	-0.119037	FALSE	rdgB
FBtr0073827	24.9034	21.8798	23.2704	23.3979	25.0364	22.7966	23.5722	24.6463	0.59092	0.294065	-0.649984	FALSE	CG11095
FBtr0073828	25.6144	25.6904	26.1985	25.9116	26.3551	27.2718	24.257	26.9358	0.746689	0.190609	-0.351235	FALSE	Nup93-1
FBtr0340292;FBtr0303418;FBtr0303419;FBtr0073834	21.8798	21.8798	21.8798	21.8798	21.8798	21.8798	21.8798	21.8798	0.500905	0	0	FALSE	jub
FBtr0346089;FBtr0073835	31.4279	31.4025	31.0695	31.3676	31.2148	31.1026	31.2997	31.1074	0.500905	0.468135	0.135711	FALSE	Clic
FBtr0346091;FBtr0073838	31.9615	31.5696	31.4612	31.9024	31.6984	31.5638	31.786	31.1932	0.542188	0.32596	0.163315	FALSE	CtsB1
FBtr0331712;FBtr0331711;FBtr0112981;FBtr0073840	29.7929	30.2392	29.712	29.2512	30.0379	29.6893	29.8768	29.7554	0.792218	0.158349	-0.0910325	FALSE	Pdcd4
FBtr0073841	21.8798	23.3546	23.375	21.8798	23.3507	22.024	24.3258	24.1151	0.500905	0.420607	-0.831627	FALSE	Grip91
FBtr0073842;FBtr0331709;FBtr0331710	26.7925	27.826	25.7105	26.4841	26.991	25.267	26.1389	26.5889	0.598103	0.289348	0.456823	FALSE	g
FBtr0343352;FBtr0073845;FBtr0073844	26.6324	27.3035	27.3373	26.8915	27.859	27.0085	27.743	27.8568	0.391422	0.619522	-0.575664	FALSE	CG9940
FBtr0346119;FBtr0340399;FBtr0073846	27.9935	27.2166	28.0766	27.3188	26.8834	26.9178	27.4164	27.5308	0.500905	0.525856	0.464254	FALSE	CG12177
FBtr0340191;FBtr0073848	24.6382	25.0339	26.208	26.368	26.0664	24.9917	25.3884	25.5797	0.946414	0.0438381	0.0554842	FALSE	CG2691
FBtr0346118;FBtr0073849	21.8798	21.8798	21.8798	21.8798	21.8798	21.8798	21.8798	21.8798	0.500905	0	0	FALSE	tth
FBtr0073850	21.8798	21.8798	21.8798	21.8798	21.8798	21.8798	21.8798	21.8798	0.500905	0	0	FALSE	Ndc80
FBtr0332844;FBtr0332843;FBtr0307296;FBtr0300566;FBtr0073855	31.004	30.6746	30.9259	30.228	30.6347	30.9048	30.4038	30.2447	0.642762	0.261205	0.161149	FALSE	ben
FBtr0304579;FBtr0073868	21.8798	21.8798	21.8798	21.8798	21.8798	21.8798	21.8798	21.8798	0.500905	0	0	FALSE	CG12480
FBtr0073894	21.8798	21.8798	21.8798	21.8798	21.8798	21.8798	21.8798	21.8798	0.500905	0	0	FALSE	CG32603
FBtr0073898;FBtr0073897	21.8798	21.8798	21.8798	21.8798	21.8798	21.8798	21.8798	21.8798	0.500905	0	0	FALSE	yl
FBtr0073899	24.2662	21.8798	21.8798	23.7543	21.8798	21.8798	21.8798	21.8798	0.500905	0.534939	1.06523	FALSE	CG11590
FBtr0073900	23.9581	24.2475	25.2806	23.2409	25.6194	24.9237	25.7693	25.592	0.254222	0.703569	-1.29431	FALSE	l(1)G0007
FBtr0073902	30.2346	30.0115	30.2005	30.417	29.8974	29.8938	29.6167	29.8729	0.138172	0.779002	0.395676	FALSE	mRpL38
FBtr0339437;FBtr0073903	21.8798	21.8798	21.8798	21.8798	21.8798	21.8798	21.8798	21.8798	0.500905	0	0	FALSE	CG1434
FBtr0339497;FBtr0073908	21.8798	21.8798	21.8798	21.8798	21.8798	21.8798	21.8798	21.8798	0.500905	0	0	FALSE	CG1461
FBtr0073916	21.8798	21.8798	21.8798	21.8798	23.838	21.8798	21.8798	21.8798	0.500905	0.353553	-0.489559	FALSE	CG9411
FBtr0073922	21.8798	21.8798	21.8798	21.8798	24.403	24.0276	23.8125	21.8798	0.239569	0.717549	-1.65094	FALSE	mRNA-cap
FBtr0073926	21.8798	21.8798	21.8798	21.8798	21.8798	21.8798	21.8798	21.8798	0.500905	0	0	FALSE	CG11674
FBtr0333429;FBtr0073927;FBtr0333428	24.3356	23.3284	24.1585	23.0225	23.6937	23.1288	23.7887	24.8714	0.838258	0.124885	-0.15941	FALSE	l(1)G0469
FBtr0073933	24.3031	23.158	24.7205	21.8798	24.3446	24.4804	23.9589	23.3403	0.621146	0.274189	-0.515687	FALSE	nmdyn-D6
FBtr0333658;FBtr0305582;FBtr0073937	21.8798	21.8798	21.8798	21.8798	21.8798	21.8798	21.8798	21.8798	0.500905	0	0	FALSE	Ag5r
FBtr0073938	23.7564	21.8798	21.8798	21.8798	21.8798	21.8798	21.8798	21.8798	0.500905	0.353553	0.469166	FALSE	Ag5r2
FBtr0339769;FBtr0073939	21.8798	21.8798	21.8798	21.8798	21.8798	21.8798	21.8798	21.8798	0.500905	0	0	FALSE	CG15890
FBtr0073945	30.1127	30.0217	30.1168	29.9764	30.0021	29.8021	29.8958	29.7377	0.2394	0.718483	0.197502	FALSE	mRpS25
FBtr0300433;FBtr0300432;FBtr0073947;FBtr0073946	26.7406	26.4394	26.891	27.0072	26.7277	26.7971	27.0119	27.0693	0.55049	0.320098	-0.131941	FALSE	CG14411
FBtr0073952;FBtr0073950;FBtr0330217;FBtr0347266;FBtr0330214;FBtr0330216;FBtr0073951;FBtr0073949;FBtr0330215;FBtr0300434;FBtr0300435;FBtr0073954	29.2064	29.5757	29.1406	29.6183	29.371	29.6633	29.5873	29.5821	0.500905	0.41084	-0.165681	FALSE	Flo2
FBtr0073956;FBtr0310270;FBtr0073957	21.8798	21.8798	21.8798	21.8798	21.8798	21.8798	21.8798	21.8798	0.500905	0	0	FALSE	be
FBtr0073959;FBtr0073958	21.8798	21.8798	21.8798	21.8798	21.8798	21.8798	21.8798	21.8798	0.500905	0	0	FALSE	CG5541
FBtr0340425;FBtr0340424;FBtr0073960	31.3158	31.0821	31.3359	30.7792	31.065	30.8253	30.9057	30.6846	0.500905	0.532438	0.258065	FALSE	CG5548
FBtr0073964	28.7848	28.3189	28.8007	28.8782	28.4674	28.669	28.5546	28.3247	0.500905	0.440853	0.191746	FALSE	CG5599
FBtr0073965	21.8798	21.8798	21.8798	21.8798	21.8798	21.8798	21.8798	21.8798	0.500905	0	0	FALSE	CG15027
FBtr0073967	22.0942	23.8119	22.0545	23.1041	23.2012	21.8798	21.8798	21.8798	0.500905	0.363542	0.556037	FALSE	Lsd-2
FBtr0340429;FBtr0073968	25.6753	25.6478	25.6959	24.5184	21.8798	24.7464	23.4665	21.8798	0.205381	0.741201	2.39124	FALSE	opm
FBtr0343521;FBtr0308838;FBtr0303294;FBtr0073972	31.9482	31.9642	32.0522	31.8347	31.988	31.6202	31.7948	31.9515	0.500905	0.402838	0.111198	FALSE	pdgy
FBtr0343378;FBtr0073973	21.8798	21.8798	21.8798	21.8798	23.2054	25.6756	22.2369	22.4755	0.463912	0.579053	-1.51857	FALSE	CG32591
FBtr0073974	21.8798	21.8798	23.6296	21.8798	21.8798	24.3306	21.8798	21.8798	0.888116	0.0884936	-0.175244	FALSE	CG9503
FBtr0073976	21.8798	21.8798	21.8798	21.8798	21.8798	21.8798	21.8798	21.8798	0.500905	0	0	FALSE	CG12398
FBtr0343380;FBtr0073978	29.9898	29.7522	29.9866	29.791	29.2236	29.2884	29.4536	29.9636	0.375505	0.628267	0.397602	FALSE	CG9509
FBtr0343381;FBtr0073979	29.5519	29.242	29.4599	29.4563	28.7196	27.3091	27.1796	28.6602	0.168542	0.762648	1.46041	FALSE	CG9512
FBtr0073980	21.8798	21.8798	21.8798	21.8798	21.8798	21.8798	21.8798	21.8798	0.500905	0	0	FALSE	CG9514
FBtr0073985	21.8798	21.8798	21.8798	21.8798	21.8798	21.8798	21.8798	21.8798	0.500905	0	0	FALSE	CG9521
FBtr0073986	21.8798	21.8798	21.8798	21.8798	21.8798	21.8798	21.8798	21.8798	0.500905	0	0	FALSE	CG9522
FBtr0073988	21.8798	21.8798	21.8798	21.8798	23.0025	25.4683	23.625	21.8798	0.396206	0.617095	-1.61412	FALSE	CG32590
FBtr0073989	30.1635	30.0803	29.604	29.7015	29.8342	29.8123	30.0284	29.3165	0.658419	0.250262	0.139488	FALSE	CG14407
FBtr0333656;FBtr0333657;FBtr0305581;FBtr0333654;FBtr0340467;FBtr0333655;FBtr0073992	21.8798	21.8798	21.8798	21.8798	21.8798	21.8798	21.8798	23.2315	0.500905	0.353553	-0.337923	FALSE	rut
FBtr0340433;FBtr0074001;FBtr0074002	21.8798	24.1074	21.8798	21.8798	21.8798	21.8798	21.8798	21.8798	0.500905	0.353553	0.556894	FALSE	CG5877
FBtr0308699;FBtr0100294;FBtr0074005;FBtr0074006;FBtr0340434	24.075	25.7723	26.3519	24.8971	24.8427	24.2307	25.8071	25.1711	0.784681	0.164278	0.261158	FALSE	Top1
FBtr0330404;FBtr0074007	21.8798	21.8798	21.8798	21.8798	21.8798	21.8798	21.8798	21.8798	0.500905	0	0	FALSE	dah
FBtr0307383;FBtr0074008;FBtr0074010;FBtr0074009;FBtr0330405;FBtr0307384;FBtr0301774	29.196	29.5898	29.4293	29.3035	29.5484	29.137	29.7854	29.7178	0.502339	0.352002	-0.167512	FALSE	HDAC6
FBtr0074011	23.9702	22.9038	30.599	23.5426	30.68	30.4771	30.448	30.819	0.237248	0.72242	-5.35211	FALSE	CG6227
FBtr0074017	21.8798	21.8798	21.8798	21.8798	21.8798	25.6136	23.9793	21.8798	0.500905	0.513842	-1.45834	FALSE	Pp1-13C
FBtr0074018	25.4036	25.6861	26.6462	26.2264	26.3366	26.3136	26.1305	26.5899	0.500905	0.412013	-0.352047	FALSE	CG12608
FBtr0074020	21.8798	21.8798	21.8798	21.8798	21.8798	21.8798	21.8798	21.8798	0.500905	0	0	FALSE	CG9114
FBtr0330403;FBtr0074027	29.4557	28.9968	29.7861	30.1365	28.9146	29.5496	29.8725	29.8476	0.932681	0.0551566	0.0476811	FALSE	RpL37a
FBtr0074028	29.071	29.4184	29.1495	28.8956	29.1513	28.8364	28.9476	29.22	0.66132	0.248491	0.0947997	FALSE	Cyp4s3
FBtr0346181;FBtr0074030;FBtr0332590	32.6269	32.6688	32.4809	32.5116	32.5233	32.5435	32.5304	32.5084	0.500905	0.35373	0.0456393	FALSE	Ahcy13
FBtr0345130;FBtr0343984;FBtr0343983;FBtr0074033;FBtr0074032	27.2105	27.6986	27.1295	26.9225	27.3314	27.731	27.3022	26.9869	0.785478	0.163651	-0.0975952	FALSE	CG6299
FBtr0074036	21.8798	21.8798	21.8798	21.8798	21.8798	21.8798	21.8798	21.8798	0.500905	0	0	FALSE	CG6308
FBtr0074039	21.8798	21.8798	23.3421	21.8798	21.8798	21.8798	21.8798	21.8798	0.500905	0.353553	0.365593	FALSE	CG6340
FBtr0074042;FBtr0343525;FBtr0074043	21.8798	23.3241	21.8798	21.8798	21.8798	23.6267	21.8798	21.8798	0.937665	0.0509053	-0.0756505	FALSE	Gmap
FBtr0339691;FBtr0074045	31.763	31.3298	31.1911	31.1108	30.9786	31.026	30.6864	30.5936	0.23959	0.71726	0.527536	FALSE	CG7860
FBtr0074046	21.8798	23.4378	22.8981	21.8798	22.7862	21.8815	22.9662	24.1568	0.649741	0.256173	-0.423789	FALSE	CG7872
FBtr0340344;FBtr0074047	21.8798	21.8798	21.8798	21.8798	27.3114	26.7871	26.9772	27.3513	2.6546e-06	0.933531	-5.22694	TRUE	CG8097
FBtr0343332;FBtr0074053	30.6285	30.4297	30.6	30.6857	28.9594	29.7078	29.8369	29.9852	0.102172	0.803352	0.963668	FALSE	CG8128
FBtr0340308;FBtr0074057;FBtr0074056	30.1484	30.2108	30.5604	30.1036	30.5569	30.3495	30.9258	30.7742	0.324071	0.657985	-0.395797	FALSE	CG9281
FBtr0074058	21.8798	24.0634	24.3681	25.3709	25.9375	26.3432	27.1847	26.4475	0.192622	0.749434	-2.55771	FALSE	Pis
FBtr0340346;FBtr0331760;FBtr0074063	21.8798	21.8798	21.8798	21.8798	21.8798	21.8798	21.8798	21.8798	0.500905	0	0	FALSE	sog
FBtr0340348;FBtr0074071	21.8798	21.8798	21.8798	21.8798	21.8798	21.8798	21.8798	21.8798	0.500905	0	0	FALSE	CG9213
FBtr0074074	21.8798	21.8798	21.8798	21.8798	21.8798	21.8798	21.8798	21.8798	0.500905	0	0	FALSE	CG9203
FBtr0074075	21.8798	21.8798	21.8798	21.8798	21.8798	21.8798	21.8798	21.8798	0.500905	0	0	FALSE	Grip128
FBtr0074077	21.8798	21.8798	21.8798	21.8798	25.4627	21.8798	21.8798	23.4041	0.500905	0.489626	-1.27682	FALSE	shtd
FBtr0332591;FBtr0074079	22.5785	24.2093	24.3498	23.1079	24.7111	24.7976	23.5966	22.8065	0.673685	0.23969	-0.416624	FALSE	Scamp
FBtr0074084;FBtr0332613	29.0296	29.2018	29.1475	28.9137	29.1101	28.6583	28.7598	28.6618	0.378463	0.626977	0.275661	FALSE	l(1)G0136
FBtr0074086	32.8797	33.0307	33.1787	32.8104	33.0735	33.0261	33.1617	33.1159	0.500905	0.457296	-0.119434	FALSE	Tcp-1zeta
FBtr0346188;FBtr0074087	28.3597	27.8412	27.9336	27.317	28.4244	28.0918	28.1449	28.354	0.500905	0.535297	-0.39089	FALSE	CG8239
FBtr0074090	30.6024	30.5917	30.4616	30.7274	30.3909	30.2471	30.272	30.639	0.444264	0.589862	0.208515	FALSE	mRpL3
FBtr0346193;FBtr0074094	31.5108	30.8742	31.3178	31.1755	30.7824	30.7538	30.4908	30.5534	0.130185	0.784423	0.5745	FALSE	mRpS30
FBtr0346189;FBtr0340116;FBtr0074104	26.9061	27.4355	26.601	27.4282	26.7188	26.8913	26.5536	26.8363	0.500905	0.504187	0.342701	FALSE	CG8578
FBtr0346794;FBtr0331597;FBtr0074111;FBtr0074110;FBtr0074108;FBtr0074107;FBtr0074106	31.7553	31.5027	31.758	31.8012	31.8092	31.8907	32.0057	31.9272	0.294961	0.677223	-0.203915	FALSE	Gbeta13F
FBtr0332618;FBtr0074112	33.5775	33.8531	33.7993	33.7988	33.7239	33.6592	33.6749	33.6559	0.500905	0.423895	0.078735	FALSE	Gapdh2
FBtr0340041;FBtr0300801;FBtr0074116;FBtr0074115;FBtr0074114	21.8798	21.8798	21.8798	21.8798	21.8798	21.8798	21.8798	21.8798	0.500905	0	0	FALSE	CG16952
FBtr0074117	21.8798	21.8798	21.8798	21.8798	24.5762	23.7345	21.8798	24.8368	0.253782	0.704921	-1.87703	FALSE	CG15916
FBtr0074130	21.8798	21.8798	21.8798	21.8798	21.8798	21.8798	21.8798	21.8798	0.500905	0	0	FALSE	CG8924
FBtr0342745;FBtr0074132	25.4588	24.499	24.2065	24.3172	23.7537	23.0061	24.4028	23.2604	0.324762	0.656842	1.01466	FALSE	Rrp47
FBtr0074134	21.8798	21.8798	21.8798	21.8798	25.3914	25.3556	25.9178	25.1696	4.38023e-05	0.929813	-3.57884	TRUE	CG8931
FBtr0333323;FBtr0333322;FBtr0074137;FBtr0074135	23.8958	25.3798	21.8798	21.8798	23.6129	21.8798	25.9005	26.5512	0.548855	0.321261	-1.22732	FALSE	exd
FBtr0074138	26.2687	22.4175	25.1778	25.1758	24.1944	21.8798	22.6666	25.4239	0.500905	0.374068	1.21881	FALSE	CG8939
FBtr0340416;FBtr0340415;FBtr0074143;FBtr0074142;FBtr0074141;FBtr0074140	22.4202	25.1726	25.0563	21.8798	27.1203	26.0235	26.1172	26.7897	0.205325	0.741944	-2.88046	FALSE	vap
FBtr0074150;FBtr0074149;FBtr0074148;FBtr0074147;FBtr0074146;FBtr0074145;FBtr0074144	30.0723	30.1835	30.2093	30.043	30.0464	30.1342	29.9974	30.0503	0.500905	0.465822	0.069977	FALSE	eIF5
FBtr0340417;FBtr0074152;FBtr0074151	30.1473	30.634	30.6237	30.0227	30.8002	30.5929	30.6862	30.6366	0.459552	0.582453	-0.322027	FALSE	CG9172
FBtr0074159;FBtr0303567	29.1321	28.152	28.7782	28.3599	28.1343	28.8876	28.6932	28.3031	0.822614	0.136831	0.100999	FALSE	Stim
FBtr0303645;FBtr0303646;FBtr0340311;FBtr0074162;FBtr0303647;FBtr0303648	25.552	26.2551	24.9998	24.0499	27.916	27.6054	28.0807	28.1182	0.0340703	0.858474	-2.7159	FALSE	Ranbp16
FBtr0333719;FBtr0301598;FBtr0074166	30.5972	30.5522	30.3554	30.6959	30.3748	30.6278	30.1246	30.0936	0.500905	0.534463	0.244984	FALSE	MSBP
FBtr0074168	21.8798	21.8798	21.8798	21.8798	21.8798	21.8798	21.8798	21.8798	0.500905	0	0	FALSE	AlkB
FBtr0074173;FBtr0074171;FBtr0074170;FBtr0074169	21.8798	21.8798	21.8798	21.8798	21.8798	21.8798	21.8798	21.8798	0.500905	0	0	FALSE	Myb
FBtr0300787;FBtr0074175;FBtr0074174	21.8798	21.8798	21.8798	21.8798	21.8798	21.8798	21.8798	21.8798	0.500905	0	0	FALSE	UBL3
FBtr0074177	30.0817	30.6724	30.5732	29.9661	30.8548	30.0884	30.6073	30.3131	0.70623	0.218102	-0.142593	FALSE	sun
FBtr0074178	30.253	30.9292	30.573	30.4464	30.8334	30.4202	30.5673	30.8579	0.66319	0.24749	-0.119298	FALSE	Aats-arg
FBtr0339445;FBtr0112798;FBtr0112797;FBtr0074182;FBtr0074181;FBtr0074180;FBtr0074179	33.0914	33.7734	33.7371	33.3399	33.6375	33.3473	34.0738	34.0937	0.500905	0.422501	-0.302649	FALSE	Chc
FBtr0074189;FBtr0074188;FBtr0074187;FBtr0074186;FBtr0074185;FBtr0113439;FBtr0074184	21.8798	21.8798	21.8798	21.8798	21.8798	21.8798	21.8798	21.8798	0.500905	0	0	FALSE	CG8974;CG32581
FBtr0074191;FBtr0074190	29.1207	28.9004	29.1904	28.8897	29.0613	29.1526	29.3344	29	0.500905	0.370778	-0.111778	FALSE	Paf-AHalpha
FBtr0074192	21.8798	21.8798	21.8798	21.8798	27.2109	26.942	27.481	27.7316	6.76241e-06	0.932696	-5.46158	TRUE	Efhc1.1
FBtr0074193	24.4271	21.8798	25.0436	24.5627	22.6533	23.0683	24.0446	23.6208	0.588926	0.295384	0.631557	FALSE	CG8952
FBtr0074201	21.8798	21.8798	21.8798	21.8798	21.8798	21.8798	21.8798	21.8798	0.500905	0	0	FALSE	CG8944
FBtr0074202	26.1626	26.4186	26.4161	25.364	26.7064	22.594	26.8735	26.8247	0.846822	0.119305	0.3407	FALSE	CG11679
FBtr0074203	21.8798	21.8798	21.8798	21.8798	21.8798	21.8798	21.8798	21.8798	0.500905	0	0	FALSE	Arp6
FBtr0340442;FBtr0074209	32.2698	32.7246	32.7052	32.2728	32.7727	32.638	32.8524	32.8202	0.430412	0.597608	-0.277736	FALSE	Mfe2
FBtr0074210	31.9604	32.2302	31.8756	32.4862	32.4193	32.3091	32.2211	32.02	0.67753	0.237444	-0.104274	FALSE	Prosalpha4
FBtr0343519;FBtr0308619;FBtr0074214;FBtr0074212;FBtr0074211	27.5022	27.4719	27.8315	27.7316	27.5339	27.6076	28.1301	27.5711	0.772456	0.172935	-0.0763567	FALSE	eas
FBtr0074216	33.8257	33.6874	33.4864	33.649	33.3623	33.3112	33.0141	33.2139	0.0938577	0.808375	0.436772	FALSE	CG3560
FBtr0074217;FBtr0334991;FBtr0334990	23.8286	23.8124	23.8589	25.8277	23.8929	24.6013	25.1001	24.6737	0.792016	0.158583	-0.23509	FALSE	caz
FBtr0336977;FBtr0074222	21.8798	21.8798	21.8798	21.8798	21.8798	21.8798	21.8798	21.8798	0.500905	0	0	FALSE	CG3679
FBtr0074226	21.8798	21.8798	21.8798	21.8798	21.8798	21.8798	21.8798	21.8798	0.500905	0	0	FALSE	CalpC
FBtr0074230	21.8798	21.8798	21.8798	21.8798	21.8798	21.8798	23.9604	21.8798	0.500905	0.353553	-0.520161	FALSE	sl
FBtr0340313;FBtr0074232;FBtr0100586;FBtr0074233	30.3108	30.0415	29.8944	30.203	30.1557	29.9993	29.8075	29.7303	0.500905	0.471285	0.189261	FALSE	nonA
FBtr0331756;FBtr0074237	28.7818	27.8872	28.0501	28.6911	27.597	28.084	28.0301	28.1766	0.500905	0.481205	0.380672	FALSE	CG9917
FBtr0074238	33.9399	33.838	33.8536	32.9756	33.8423	33.422	33.6105	33.7619	0.984278	0.0115498	-0.00740004	FALSE	Cyp1
FBtr0346059;FBtr0074240	32.9617	32.9732	32.956	32.8888	33.1246	33.1533	33.2879	33.2232	0.025401	0.868259	-0.252315	FALSE	CG9914
FBtr0074244;FBtr0074243;FBtr0074242;FBtr0074241	31.2995	31.0583	30.9084	30.5648	31.0114	31.0421	30.9475	30.973	0.889433	0.0874756	-0.0357016	FALSE	CG9911
FBtr0074245;FBtr0100556	23.1682	24.1809	25.3305	21.8798	25.6416	24.6153	24.8473	24.3372	0.500905	0.500781	-1.2205	FALSE	CG32576
FBtr0074247;FBtr0074246;FBtr0340443	21.8798	21.8798	21.8798	21.8798	22.9165	21.8798	21.8798	24.0917	0.500905	0.498332	-0.812175	FALSE	kat80
FBtr0343595;FBtr0074259;FBtr0074258;FBtr0074257	30.9983	31.051	30.9681	30.5889	30.9856	30.6497	30.8085	30.9721	0.822899	0.136258	0.0475906	FALSE	Nipsnap
FBtr0301301;FBtr0074267;FBtr0074266;FBtr0074264;FBtr0074262;FBtr0074265;FBtr0074263;FBtr0074261	24.0315	25.2404	26.3752	22.8317	21.8798	24.2363	24.125	23.379	0.500905	0.437371	1.21466	FALSE	Fur2
FBtr0340314;FBtr0074270;FBtr0074269;FBtr0074268	28.3605	28.1505	29.0722	29.3883	29.046	28.5547	29.9035	29.5565	0.500905	0.427432	-0.522287	FALSE	CG4239
FBtr0074271	21.8798	23.4794	23.3646	21.8798	23.2494	21.8798	21.8798	24.415	0.868503	0.102845	-0.205106	FALSE	mei-41
FBtr0074275;FBtr0334037;FBtr0334036;FBtr0308607;FBtr0308606;FBtr0074274;FBtr0074273	21.8798	21.8798	21.8798	21.8798	21.8798	21.8798	21.8798	21.8798	0.500905	0	0	FALSE	Traf-like
FBtr0343349;FBtr0074278	29.5983	29.5919	29.6782	29.4815	29.3326	29.2097	29.4562	28.9347	0.236698	0.723145	0.354169	FALSE	rngo
FBtr0074281;FBtr0343632;FBtr0074279;FBtr0343633;FBtr0074280	31.1623	30.4394	30.9119	31.1205	30.282	30.9582	30.2364	30.1821	0.438558	0.592437	0.493882	FALSE	Rbp2
FBtr0340157;FBtr0074283	28.8339	28.3588	28.569	28.5573	28.3596	28.3284	28.4716	28.4531	0.500905	0.534453	0.176591	FALSE	Ubc7
FBtr0299587;FBtr0074284;FBtr0340158	23.421	21.8798	25.6389	23.5889	25.5596	21.8798	21.8798	25.5482	0.970994	0.0246441	-0.0846711	FALSE	Nup153
FBtr0074285	21.8798	23.6025	23.3503	26.4661	26.8077	26.0962	23.2161	25.136	0.500905	0.413096	-1.48931	FALSE	mbt
FBtr0340152;FBtr0340153;FBtr0340151;FBtr0074286	26.8569	26.8977	26.8798	26.7004	26.2432	21.8798	26.5052	26.6331	0.500905	0.444148	1.51836	FALSE	Rok
FBtr0074288	22.8848	23.0442	24.1932	24.7699	23.0692	27.3203	25.5057	26.0897	0.500905	0.547759	-1.77321	FALSE	CG9782
FBtr0310319;FBtr0074289;FBtr0330409	26.6122	27.3805	27.0108	27.4647	27.5183	27.14	27.1461	27.4095	0.566203	0.30957	-0.186451	FALSE	CG9784
FBtr0074290	21.8798	23.2629	21.8798	21.8798	25.4244	21.8798	21.8798	25.5916	0.500905	0.446509	-1.46834	FALSE	SMC3
FBtr0332870;FBtr0305198;FBtr0074293;FBtr0074292	29.7264	30.0153	29.9491	30.1977	30.006	29.5202	30.2003	29.8688	0.791456	0.159163	0.0732884	FALSE	CanA-14F
FBtr0309793;FBtr0305593;FBtr0074294	29.2991	28.0096	29.0339	29.2064	27.9771	28.0408	29.0296	28.8641	0.500905	0.357548	0.40935	FALSE	Pp2B-14D
FBtr0074297	21.8798	21.8798	21.8798	21.8798	21.8798	21.8798	21.8798	21.8798	0.500905	0	0	FALSE	CG9903
FBtr0074299	21.8798	21.8798	21.8798	21.8798	27.0949	26.5317	27.5415	27.0376	2.36599e-05	0.930967	-5.17164	TRUE	Cnx14D
FBtr0343016;FBtr0074300	32.0561	31.8934	32.0091	31.6751	32.0545	32.0662	31.8832	31.875	0.692833	0.227382	-0.0612689	FALSE	eIF-2alpha
FBtr0074301;FBtr0343350	26.5269	26.8381	26.7582	26.2113	26.6442	26.3819	26.2803	26.837	0.877238	0.0960393	0.0477791	FALSE	CG9947
FBtr0334041;FBtr0334038;FBtr0074302	22.3453	23.6488	22.8019	24.9536	24.6852	24.8406	23.977	23.3441	0.500905	0.399721	-0.774312	FALSE	AnxB11
FBtr0340315;FBtr0074305	21.8798	21.8798	21.8798	21.8798	21.8798	21.8798	23.7458	24.1282	0.500905	0.536978	-1.0286	FALSE	TH1
FBtr0074310;FBtr0074309;FBtr0074308;FBtr0074307;FBtr0074306	21.8798	21.8798	21.8798	21.8798	21.8798	23.2765	21.8798	21.8798	0.500905	0.353553	-0.349169	FALSE	CG9992
FBtr0345129;FBtr0340149;FBtr0074313;FBtr0074312;FBtr0074311	35.1572	34.5209	35.0117	35.1834	34.3205	34.6447	34.6949	34.6663	0.385808	0.622503	0.386689	FALSE	RpS19a
FBtr0340150;FBtr0074314	21.8798	21.8798	21.8798	21.8798	21.8798	21.8798	21.8798	21.8798	0.500905	0	0	FALSE	mthl1
FBtr0302364;FBtr0074315	22.5086	25.1524	21.8798	21.8798	22.8931	23.8604	24.8202	24.3664	0.500905	0.433222	-1.12991	FALSE	CG32573
FBtr0074321	23.5473	24.6134	23.7268	24.521	21.8798	24.9843	24.8761	23.6696	0.841357	0.122557	0.249696	FALSE	CG4653
FBtr0074325	21.8798	21.8798	21.8798	21.8798	21.8798	21.8798	21.8798	21.8798	0.500905	0	0	FALSE	TwdlX
FBtr0074326	21.8798	21.8798	21.8798	21.8798	21.8798	21.8798	21.8798	21.8798	0.500905	0	0	FALSE	TwdlY
FBtr0074329	21.8798	21.8798	21.8798	21.8798	21.8798	21.8798	21.8798	21.8798	0.500905	0	0	FALSE	Twdlalpha
FBtr0074330	28.2535	28.4688	28.3432	28.3015	28.2477	28.7986	28.5071	28.1981	0.668641	0.243547	-0.0961228	FALSE	mRpL22
FBtr0074333	23.7537	24.7691	21.8798	21.8798	23.5222	21.8798	21.8798	21.8798	0.526764	0.336133	0.780207	FALSE	CG4789
FBtr0112994;FBtr0074338;FBtr0074337;FBtr0112995;FBtr0074336	25.0421	21.8798	23.9692	21.8798	25.8952	21.8798	24.4467	26.0327	0.500905	0.383359	-1.37085	FALSE	CG4829
FBtr0074339	26.7565	26.7341	27.5409	26.9967	26.9271	26.997	27.0323	27.3449	0.839865	0.123578	-0.0682866	FALSE	CG4872
FBtr0342976;FBtr0074341	21.8798	21.8798	21.8798	21.8798	21.8798	21.8798	21.8798	21.8798	0.500905	0	0	FALSE	Rcp
FBtr0310519;FBtr0074342	21.8798	21.8798	21.8798	21.8798	21.8798	21.8798	21.8798	21.8798	0.500905	0	0	FALSE	CG4880
FBtr0342973;FBtr0074345;FBtr0074344	26.4651	27.733	27.6723	27.0131	27.4141	27.1378	27.7199	27.2208	0.769606	0.174838	-0.152264	FALSE	CG4928
FBtr0310520;FBtr0074347	26.963	26.5065	26.03	26.8153	26.7423	27.0561	23.6005	22.1103	0.500905	0.461251	1.70143	FALSE	CG9099
FBtr0074348	21.8798	21.8798	21.8798	21.8798	21.8798	21.8798	21.8798	21.8798	0.500905	0	0	FALSE	CG9104
FBtr0074352	21.8798	21.8798	21.8798	21.8798	21.8798	21.8798	21.8798	21.8798	0.500905	0	0	FALSE	CG9125
FBtr0074354;FBtr0306801;FBtr0074353	29.1114	28.891	29.1915	29.5396	29.0416	29.124	29.2969	29.004	0.779744	0.167675	0.0667606	FALSE	CG9132
FBtr0344090;FBtr0074355	21.8798	25.0604	25.7612	21.8798	26.352	25.6253	23.4135	23.6719	0.551062	0.319606	-1.12036	FALSE	Rrp45
FBtr0301352;FBtr0301354;FBtr0301353;FBtr0074357	31.4897	30.9138	30.9833	31.1188	30.8226	31.1034	30.8941	30.9898	0.500905	0.418208	0.173914	FALSE	if
FBtr0343364;FBtr0074359;FBtr0343363	26.9587	26.9748	26.6649	26.1609	26.7593	26.7816	27.2879	27.3807	0.500905	0.47504	-0.362536	FALSE	CG9634
FBtr0339830;FBtr0074362	27.0858	26.9372	27.1744	27.1632	26.3262	26.433	26.3919	26.5643	0.00524515	0.901944	0.661286	FALSE	CG9673
FBtr0074363	27.5924	26.9527	27.4996	27.7429	26.7348	26.4419	23.5862	26.7863	0.450931	0.587089	1.5596	FALSE	spheroide
FBtr0074364	21.8798	21.8798	21.8798	21.8798	21.8798	21.8798	21.8798	21.8798	0.500905	0	0	FALSE	CG9676
FBtr0074371;FBtr0074370;FBtr0074369;FBtr0074368;FBtr0074367;FBtr0074366;FBtr0074365	26.192	26.5204	26.3734	26.8684	26.2894	25.8077	26.5951	26.5796	0.631461	0.267686	0.170651	FALSE	Sep4
FBtr0074372	21.8798	21.8798	21.8798	21.8798	21.8798	21.8798	22.8007	22.2519	0.500905	0.484955	-0.323273	FALSE	Axs
FBtr0074373	21.8798	21.8798	21.8798	21.8798	21.8798	23.375	21.8798	21.8798	0.500905	0.353553	-0.373817	FALSE	CG13010
FBtr0074376	21.8798	21.8798	21.8798	21.8798	21.8798	21.8798	21.8798	21.8798	0.500905	0	0	FALSE	CG9723
FBtr0112993;FBtr0074377	27.9834	28.1078	29.112	28.5808	27.8775	28.3614	27.9456	27.909	0.500905	0.489969	0.422604	FALSE	SmG
FBtr0340358;FBtr0334461;FBtr0074385;FBtr0074384;FBtr0334460	21.8798	21.8798	21.8798	21.8798	21.8798	21.8798	21.8798	21.8798	0.500905	0	0	FALSE	CG4991
FBtr0074387	22.769	23.853	23.4338	22.7769	23.3908	24.5652	23.2205	24.1227	0.500905	0.487765	-0.616587	FALSE	CG5010
FBtr0074388;FBtr0343763;FBtr0343764;FBtr0111000	21.8798	21.8798	21.8798	21.8798	21.8798	21.8798	21.8798	21.8798	0.500905	0	0	FALSE	baz
FBtr0074390	21.8798	21.8798	21.8798	21.8798	21.8798	21.8798	21.8798	21.8798	0.500905	0	0	FALSE	CG32564
FBtr0074392	21.8798	21.8798	21.8798	21.8798	21.8798	21.8798	21.8798	21.8798	0.500905	0	0	FALSE	CG18258
FBtr0340616;FBtr0074393	29.9413	30.2577	29.8547	29.553	29.1439	29.0225	28.8346	28.4888	0.0505975	0.841875	1.02922	FALSE	CG5162
FBtr0074402	21.8798	25.4888	25.0341	21.8798	21.8798	21.8798	21.8798	21.8798	0.500905	0.538442	1.69084	FALSE	CG12995
FBtr0074404	21.8798	21.8798	21.8798	21.8798	21.8798	21.8798	21.8798	21.8798	0.500905	0	0	FALSE	xmas-2
FBtr0345132;FBtr0343293;FBtr0343292;FBtr0074406	32.9243	31.899	33.1465	32.9006	32.8886	32.3486	32.5409	32.8072	0.887707	0.088913	0.0712797	FALSE	RpS5a
FBtr0074410;FBtr0334462;FBtr0113478	25.2568	21.8798	24.4011	21.8798	24.2148	21.8798	21.8798	23.6597	0.792028	0.158489	0.445843	FALSE	Arpc3B
FBtr0304839;FBtr0304840;FBtr0074412;FBtr0310524;FBtr0330596;FBtr0310525	23.1404	23.5065	21.4963	22.4609	23.6985	21.8798	21.8798	21.8798	0.752284	0.186877	0.316576	FALSE	CG8949
FBtr0346190;FBtr0308839;FBtr0074415	26.7754	28.1521	27.6462	27.6166	27.6218	27.5887	28.2687	28.1566	0.500905	0.376406	-0.36139	FALSE	CG9086
FBtr0074417	21.8798	21.8798	21.8798	21.8798	21.8798	21.8798	21.8798	21.8798	0.500905	0	0	FALSE	CG13001
FBtr0342974;FBtr0074418	21.8798	21.8798	21.8798	21.8798	21.8798	21.8798	21.8798	21.8798	0.500905	0	0	FALSE	wus
FBtr0339778;FBtr0339777;FBtr0074428;FBtr0074427;FBtr0074425	21.8798	21.8798	21.8798	21.8798	21.8798	21.8798	21.8798	21.8798	0.500905	0	0	FALSE	CG5445
FBtr0074432;FBtr0074431	26.4537	25.8954	26.816	27.005	25.9054	23.5551	27.1912	23.6903	0.500905	0.508708	1.45702	FALSE	CG5613
FBtr0074436	21.8798	21.8798	21.8798	21.8798	21.8798	21.8798	21.8798	21.8798	0.500905	0	0	FALSE	CG8568
FBtr0074440;FBtr0074439;FBtr0340619	23.9574	21.8798	24.1279	25.2451	24.795	27.7903	24.0264	24.2392	0.500905	0.427317	-1.41019	FALSE	CG8611
FBtr0074441	28.5948	28.5886	27.9191	21.8798	28.2906	28.7391	28.5948	27.5889	0.52635	0.336482	-1.55779	FALSE	Fim
FBtr0074443;FBtr0074442	23.1306	24.1814	24.7995	24.5448	26.0567	25.8512	26.529	26.6955	0.0497574	0.842673	-2.11904	FALSE	Fim
FBtr0339779;FBtr0074445	23.3759	21.8798	23.8246	23.6518	24.3411	21.8798	21.8798	21.8798	0.543932	0.324661	0.687919	FALSE	CG8664
FBtr0074446	21.8798	21.8798	21.8798	21.8798	21.8798	21.8798	21.8798	21.8798	0.500905	0	0	FALSE	CG8675
FBtr0339780;FBtr0074447	21.8798	23.4449	21.8798	23.9724	21.8798	21.8798	21.8798	21.8798	0.500905	0.532726	0.914441	FALSE	CG8915
FBtr0074451;FBtr0333757;FBtr0301696;FBtr0340621;FBtr0340620	21.8798	21.8798	21.8798	21.8798	24.6181	21.8798	21.8798	21.8798	0.500905	0.353553	-0.684586	FALSE	X11L
FBtr0340622;FBtr0074452	33.3893	33.2693	33.0348	33.4325	33.0066	33.2503	32.8985	32.6536	0.39346	0.618377	0.329259	FALSE	CG5703
FBtr0074453	21.8798	21.8798	21.8798	21.8798	24.2227	21.8798	25.1172	21.8798	0.500905	0.531042	-1.3951	FALSE	CG5800
FBtr0074454	27.3674	28.0093	26.6855	27.3091	27.9318	27.0406	27.3054	27.2553	0.943001	0.046539	-0.0404491	FALSE	beta-Spec
FBtr0074456;FBtr0074455	27.7801	27.3197	27.1551	26.9617	27.4961	27.5307	26.8116	26.3499	0.61223	0.279971	0.257077	FALSE	par-6
FBtr0342784;FBtr0074462	26.7132	27.2244	26.7145	22.5493	23.1362	27.5128	28.162	27.8413	0.73315	0.200039	-0.862742	FALSE	CG6398
FBtr0074463	24.1401	24.4182	23.3396	21.8798	25.4115	25.981	23.5027	23.293	0.500905	0.424806	-1.10262	FALSE	e(y)1
FBtr0303572;FBtr0074464	27.5651	27.6482	27.4992	28.2324	27.9583	27.6397	27.6534	27.6395	0.96695	0.0277831	0.0135108	FALSE	Ucp4A
FBtr0074465	21.8798	21.8798	21.8798	21.8798	21.8798	21.8798	21.8798	21.8798	0.500905	0	0	FALSE	CG6506
FBtr0074470;FBtr0074469;FBtr0074468;FBtr0074471	24.3223	24.4049	23.444	24.7452	25.2391	21.8798	24.8037	25.4409	0.940367	0.0486554	-0.111774	FALSE	CG15814
FBtr0074472	27.3073	26.1458	26.1225	26.8875	21.8798	21.8798	24.7686	23.36	0.0587462	0.834878	3.64375	FALSE	CG8142
FBtr0074475	21.8798	21.8798	21.8798	21.8798	24.9088	21.8798	21.8798	21.8798	0.500905	0.353553	-0.757257	FALSE	CG8173
FBtr0346186;FBtr0340633;FBtr0100463;FBtr0074476	21.8798	21.8798	21.8798	21.8798	21.8798	21.8798	21.8798	21.8798	0.500905	0	0	FALSE	CG8188
FBtr0340636;FBtr0074478;FBtr0340634;FBtr0074477;FBtr0340635	23.7083	23.4394	21.8798	22.5128	23.6808	21.8798	21.8798	24.2213	0.979939	0.0156671	-0.0303616	FALSE	chas
FBtr0074479	21.8798	21.8798	21.8798	21.8798	21.8798	21.8798	21.8798	21.8798	0.500905	0	0	FALSE	CG12990
FBtr0074480	21.8798	21.8798	21.8798	21.8798	21.8798	21.8798	21.8798	23.3957	0.500905	0.353553	-0.37897	FALSE	IntS2
FBtr0074483;FBtr0074482;FBtr0074481;FBtr0333659;FBtr0333660;FBtr0333661;FBtr0333662	25.1514	27.2935	27.7769	25.6631	27.3337	27.2623	27.2005	26.9256	0.500905	0.387038	-0.70932	FALSE	RhoGAPp190
FBtr0340623;FBtr0074484	21.8798	21.8798	21.8798	21.8798	25.2128	26.1802	27.085	26.9494	0.00249636	0.910527	-4.47705	TRUE	CG8289
FBtr0074486	21.8798	21.8798	21.8798	21.8798	21.8798	21.8798	21.8798	21.8798	0.500905	0	0	FALSE	CG8326
FBtr0334034;FBtr0074493	23.3522	22.0186	21.6248	21.8798	23.8592	23.9609	23.1697	23.9942	0.157769	0.768549	-1.52715	FALSE	CG6769
FBtr0342787;FBtr0074504	30.3871	30.285	30.3666	30.5131	30.1636	30.4024	30.217	30.2746	0.500905	0.548466	0.123558	FALSE	Vps4
FBtr0344233;FBtr0074505	21.8798	21.8798	21.8798	21.8798	21.8798	21.8798	21.8798	21.8798	0.500905	0	0	FALSE	CG6847
FBtr0074510;FBtr0339540	21.8798	21.8798	21.8798	21.8798	21.8798	21.8798	21.8798	21.8798	0.500905	0	0	FALSE	dik
FBtr0074511	33.703	33.6486	33.7788	33.5447	33.6699	33.5619	33.614	33.6055	0.500905	0.364262	0.0559175	FALSE	scu
FBtr0074514	21.8798	21.8798	21.8798	21.8798	21.8798	21.8798	21.8798	21.8798	0.500905	0	0	FALSE	Taf8
FBtr0074515	25.5867	26.2551	26.2679	25.7568	24.3758	25.8852	25.9574	26.2553	0.61473	0.278262	0.348213	FALSE	CG7135
FBtr0074521	27.2504	26.9372	26.3647	27.2493	27.3652	26.2642	26.8339	27.0452	0.887204	0.08932	0.0732608	FALSE	wupA
FBtr0310272;FBtr0074528;FBtr0074527	22.9896	21.8798	24.5297	22.8928	21.8798	21.8798	21.8798	21.8798	0.385808	0.622354	1.19321	FALSE	CG7192
FBtr0343318;FBtr0343317;FBtr0074531;FBtr0074530	21.8798	21.8798	21.8798	21.8798	21.8798	21.8798	21.8798	21.8798	0.500905	0	0	FALSE	CG7536
FBtr0074540	26.8467	23.4813	28.1482	23.1054	27.8577	28.4778	28.8455	28.3971	0.335283	0.65154	-2.9991	FALSE	CG7772
FBtr0074544	21.8798	23.3058	23.8278	21.8798	21.8798	23.1332	21.8798	21.8798	0.546755	0.322731	0.530182	FALSE	Arp8
FBtr0335120;FBtr0335119;FBtr0100239;FBtr0074545	25.7163	23.0463	24.4581	24.7093	21.8798	21.8798	21.8798	21.8798	0.0639227	0.830556	2.60273	FALSE	Frq1
FBtr0343296;FBtr0074553	21.8798	21.8798	21.8798	21.8798	21.8798	21.8798	21.8798	21.8798	0.500905	0	0	FALSE	CG6106
FBtr0074558	21.8798	21.8798	21.8798	21.8798	21.8798	21.8798	21.8798	21.8798	0.500905	0	0	FALSE	CG6179
FBtr0346625;FBtr0074559	34.641	34.398	34.5257	34.3264	34.242	34.1976	34.0071	33.9891	0.125635	0.787853	0.363773	FALSE	Tsf1
FBtr0074568;FBtr0074569	26.4596	26.7685	26.5181	26.2714	26.1465	22.5673	24.0493	25.8668	0.385808	0.623277	1.84693	FALSE	CG32548
FBtr0074571;FBtr0074570;FBtr0074575;FBtr0074574	27.7058	27.8227	28.0499	28.2499	27.4608	27.2337	27.7701	27.6439	0.296811	0.67576	0.429955	FALSE	CG32549
FBtr0074576	30.1842	30.7007	30.7871	30.1121	31.0517	30.6751	30.8486	30.9908	0.351346	0.642176	-0.445544	FALSE	betaCOP
FBtr0074593;FBtr0333806;FBtr0333804	23.6575	23.011	24.977	23.9461	21.8798	21.8798	21.8798	21.8798	0.0553559	0.837697	2.0181	FALSE	Aats-his
FBtr0074596	21.8798	21.8798	21.8798	21.8798	21.8798	21.8798	21.8798	21.8798	0.500905	0	0	FALSE	CG15047
FBtr0074601	23.2428	21.8798	23.5434	24.7979	21.8798	22.7081	21.8798	23.1056	0.500905	0.475188	0.972649	FALSE	CG6540
FBtr0074602	23.8026	22.2196	22.8425	22.5779	23.557	21.8798	23.1741	22.6523	0.958048	0.0344842	0.0448726	FALSE	fu
FBtr0342846;FBtr0074603	21.8798	21.8798	21.8798	21.8798	21.8798	21.8798	21.8798	21.8798	0.500905	0	0	FALSE	phm
FBtr0074615	29.0809	28.8729	28.9862	28.949	29.0745	28.9759	28.8238	28.6508	0.551056	0.319732	0.0909858	FALSE	CG6617
FBtr0340368;FBtr0074622	26.329	24.3374	25.7971	25.1498	26.5958	23.6877	26.2481	25.341	0.96148	0.0317563	-0.0648004	FALSE	Ggt-1
FBtr0346082;FBtr0074625;FBtr0074624	27.8184	28.3468	28.2022	28.0009	28.8651	28.2861	28.2249	28.4429	0.456118	0.584748	-0.362668	FALSE	GalNAc-T2
FBtr0343047;FBtr0074626	23.4526	21.8798	26.8281	23.522	23.9066	22.9594	26.2534	24.9864	0.762795	0.180275	-0.605837	FALSE	CG15043
FBtr0074627	27.6512	27.3225	27.517	27.7592	26.7718	26.6164	26.2646	26.4755	0.0133278	0.88561	1.03042	FALSE	CG15044
FBtr0074628	21.8798	21.8798	21.8798	21.8798	21.8798	21.8798	21.8798	21.8798	0.500905	0	0	FALSE	CG15046
FBtr0074629	26.5797	26.6216	25.694	26.7985	26.1403	26.4354	26.3404	26.076	0.663961	0.246944	0.175392	FALSE	psh
FBtr0074631	30.2632	30.0021	30.3653	29.8256	29.8574	29.9871	30.0687	30.1534	0.646159	0.258885	0.0973922	FALSE	CG6891
FBtr0074635	21.8798	22.6946	24.1717	21.8798	22.1834	23.2779	21.8798	23.4007	0.978895	0.0167117	-0.0289985	FALSE	Atg101
FBtr0074643	25.0216	21.8798	21.8798	24.2136	25.5112	21.8798	25.4206	24.8109	0.507812	0.348413	-1.15693	FALSE	CG7288
FBtr0333158;FBtr0074644	21.8798	21.8798	21.8798	21.8798	22.727	22.7427	23.3243	23.8268	0.0589095	0.834628	-1.2754	FALSE	CG32544
FBtr0342877;FBtr0074647	28.1353	28.08	28.054	27.8823	28.1479	28.0193	28.4583	28.4403	0.481659	0.56899	-0.228534	FALSE	CG7332
FBtr0344973;FBtr0074648	21.8798	21.8798	21.8798	21.8798	26.8259	27.6469	27.5474	27.2495	1.02833e-05	0.932207	-5.43765	TRUE	CG7349
FBtr0074652;FBtr0342879;FBtr0342880	21.8798	21.8798	21.8798	21.8798	21.8798	21.8798	21.8798	21.8798	0.500905	0	0	FALSE	CG7358
FBtr0346018;FBtr0310441;FBtr0074654	31.5401	31.1719	31.3109	31.3351	31.1803	31.6049	31.2395	31.0698	0.765167	0.178227	0.0658643	FALSE	CG7322
FBtr0074655	28.3375	27.6634	27.8795	28.4394	27.6466	27.9159	27.3955	27.873	0.500905	0.531503	0.372209	FALSE	CG7280
FBtr0074659;FBtr0074658;FBtr0074657;FBtr0074656	31.7578	31.1697	31.0598	31.7415	31.2058	31.3552	30.2154	30.4271	0.481891	0.568241	0.631332	FALSE	bnb
FBtr0074661	21.8798	21.8798	21.8798	21.8798	21.8798	21.8798	21.8798	21.8798	0.500905	0	0	FALSE	CG18259
FBtr0074664	21.8798	21.8798	21.8798	21.8798	21.8798	21.8798	21.8798	21.8798	0.500905	0	0	FALSE	CG7406
FBtr0074666	21.8798	21.8798	21.8798	21.8798	21.8798	21.8798	21.8798	21.8798	0.500905	0	0	FALSE	CG7453
FBtr0074669	21.8798	21.8798	21.8798	21.8798	21.8798	21.8798	24.6464	21.8798	0.500905	0.353553	-0.691665	FALSE	Mec2
FBtr0074672	26.9887	21.8798	23.9702	26.8519	28.2949	28.2695	27.0059	27.9969	0.342502	0.646698	-2.96916	FALSE	Mur18B
FBtr0074674;FBtr0332392	21.8798	21.8798	21.8798	21.8798	21.8798	21.8798	21.8798	21.8798	0.500905	0	0	FALSE	CG7884
FBtr0074675	25.8425	25.7865	26.8898	26.3617	26.8123	26.5509	26.3508	26.7927	0.500905	0.476555	-0.406529	FALSE	CG7889
FBtr0344324;FBtr0074682	21.8798	23.1238	22.4196	21.8798	21.8798	21.8798	23.2763	23.7685	0.668383	0.243907	-0.37536	FALSE	out
FBtr0343320;FBtr0074683	21.8798	21.8798	21.8798	21.8798	21.8798	21.8798	21.8798	21.8798	0.500905	0	0	FALSE	CG8051
FBtr0074684;FBtr0301226	23.4222	21.8798	23.0545	24.0125	24.5075	22.8551	22.1093	24.4825	0.736839	0.197186	-0.396373	FALSE	CG8034
FBtr0074686	24.5615	25.2873	23.289	22.8452	21.8798	23.2668	24.2049	23.5685	0.500905	0.361008	0.765746	FALSE	CG32536
FBtr0343635;FBtr0074689;FBtr0343634	21.8798	21.8798	21.8798	21.8798	21.8798	21.8798	21.8798	21.8798	0.500905	0	0	FALSE	rictor
FBtr0074693	21.8798	21.8798	21.8798	21.8798	23.8253	22.6931	23.6567	23.178	0.0331764	0.859855	-1.45849	FALSE	Ulp1
FBtr0074695	21.8798	23.7697	21.8798	21.8798	23.1975	21.8798	21.8798	21.8798	0.879956	0.0943485	0.143034	FALSE	CG7990
FBtr0343313;FBtr0074697	26.3854	27.1113	24.0142	23.5006	26.8277	26.3461	26.3746	26.1509	0.500905	0.44144	-1.17194	FALSE	CG7556
FBtr0309224;FBtr0309223;FBtr0074708;FBtr0074707	21.8798	23.145	21.8798	21.8798	25.3845	21.8798	21.8798	21.8798	0.699504	0.222904	-0.559857	FALSE	kek5
FBtr0346014;FBtr0074711	30.4018	30.7689	30.6534	30.6249	31.1007	30.8208	30.9218	31.0341	0.144153	0.775104	-0.357134	FALSE	Nat1
FBtr0074712	32.1768	32.1691	32.1343	32.5241	31.8517	31.807	31.4982	31.656	0.075041	0.821777	0.547812	FALSE	CG12203
FBtr0339439;FBtr0307194;FBtr0307193;FBtr0307192;FBtr0074720;FBtr0074719;FBtr0074718;FBtr0074715;FBtr0074714;FBtr0074713;FBtr0339440;FBtr0074717;FBtr0074716	29.0328	29.2548	28.9565	28.9791	29.0678	29.1432	29.4955	29.5171	0.489509	0.563569	-0.250117	FALSE	Pfrx
FBtr0074728;FBtr0074727;FBtr0331158	26.3828	26.0451	27.4538	26.5119	26.8313	27.4161	28.0297	27.6566	0.367488	0.633412	-0.88503	FALSE	car
FBtr0074730	21.8798	21.8798	21.8798	21.8798	21.8798	21.8798	21.8798	21.8798	0.500905	0	0	FALSE	CG14205
FBtr0344339;FBtr0308192;FBtr0074732;FBtr0074731	33.8567	33.4745	33.6292	33.9141	33.1829	33.4035	33.578	33.3859	0.299515	0.673758	0.33104	FALSE	RpS10b
FBtr0074734	27.7215	27.0984	26.3853	27.624	26.7362	27.305	26.9738	27.0653	0.715375	0.212252	0.187229	FALSE	CG14207
FBtr0344069;FBtr0074739;FBtr0074738;FBtr0074737	21.8798	21.8798	21.8798	23.8342	21.8798	24.2345	23.185	22.0169	0.686458	0.231117	-0.460655	FALSE	Shawn
FBtr0344070;FBtr0074740	21.8798	21.8798	21.8798	21.8798	21.8798	21.8798	21.8798	21.8798	0.500905	0	0	FALSE	CG14210
FBtr0332481;FBtr0074741	23.1353	21.8798	23.9674	21.8798	21.8798	24.4138	24.1049	21.8521	0.80287	0.15172	-0.347067	FALSE	MKP-4
FBtr0074744;FBtr0074743;FBtr0334277	26.6079	25.0468	23.9543	25.9093	23.7342	26.6733	27.2816	25.6591	0.765822	0.177755	-0.457455	FALSE	Rcd-1
FBtr0345016;FBtr0074746	21.8798	21.8798	26.3202	21.8798	22.9123	21.8798	22.5107	21.8798	0.694805	0.225927	0.694242	FALSE	CG14215
FBtr0344152;FBtr0074747	22.655	21.8798	24.3736	21.8798	21.8798	21.8798	21.8798	21.8798	0.500905	0.461653	0.817256	FALSE	Ssu72
FBtr0074748;FBtr0340611;FBtr0074749	31.7505	31.806	31.8566	31.708	31.5191	31.5776	31.7874	31.5877	0.324052	0.658557	0.162313	FALSE	Zw
FBtr0340612;FBtr0074750	30.3004	30.4342	30.02	30.088	30.2994	30.1443	29.7614	29.9954	0.500905	0.376364	0.16052	FALSE	Ubqn
FBtr0309215;FBtr0309214;FBtr0074751	28.898	29.7218	29.5361	30.0181	29.4967	29.0007	29.5839	29.3808	0.668715	0.243465	0.17799	FALSE	Cdc42
FBtr0074756	24.0195	24.3904	24.1939	23.7189	21.8798	21.8798	24.6086	23.9896	0.500905	0.456438	0.991228	FALSE	dome
FBtr0340614;FBtr0074759	22.3287	23.6187	23.6417	24.1176	21.8798	21.8798	23.3794	21.8798	0.385808	0.622672	1.172	FALSE	Ranbp21
FBtr0345991;FBtr0074760	27.323	27.6162	26.8563	27.6346	28.2267	25.3638	27.9699	27.3751	0.912342	0.0699205	0.123632	FALSE	Arp10
FBtr0074761	26.5597	26.5478	26.5738	26.4303	26.5838	26.2579	27.1176	27.0524	0.500905	0.380951	-0.225037	FALSE	CG12237
FBtr0334281;FBtr0334278;FBtr0074762;FBtr0334280;FBtr0334279	24.6795	23.4587	23.5682	23.9807	21.8798	21.8798	21.8798	21.8798	0.0117939	0.887873	2.04202	FALSE	e(y)3
FBtr0332484;FBtr0332483;FBtr0074763;FBtr0332482	27.4432	27.1809	27.3171	26.2871	27.6692	27.4646	27.1811	27.3069	0.500905	0.420547	-0.348348	FALSE	NAA20
FBtr0344072;FBtr0074767	26.2868	25.6101	25.8465	26.1114	23.8974	25.8677	25.5282	23.8121	0.402895	0.614048	1.18735	FALSE	Tim9b
FBtr0303999;FBtr0074772;FBtr0074771;FBtr0336691;FBtr0074773;FBtr0304000;FBtr0074774;FBtr0309237;FBtr0336692	23.8315	24.479	23.0999	23.4077	24.2619	24.5824	23.6035	23.2756	0.73315	0.199941	-0.226339	FALSE	Tao
FBtr0301308;FBtr0074775;FBtr0343590;FBtr0074777;FBtr0301307;FBtr0074776	24.6301	23.9412	25.1258	21.8798	25.7796	22.8975	26.8404	26.6341	0.500905	0.469482	-1.64366	FALSE	Grip84
FBtr0074784;FBtr0302082	26.3601	25.5343	26.3535	25.44	26.298	27.3976	26.6744	26.4443	0.372993	0.629609	-0.781585	FALSE	pcm
FBtr0346015;FBtr0074785	27.6186	27.2387	27.6577	27.8141	27.2404	27.7443	27.461	27.4417	0.653235	0.253588	0.110452	FALSE	mRpS14
FBtr0074787	22.7204	23.528	21.8798	21.8798	22.976	21.8798	21.8798	22.7379	0.867493	0.103912	0.133616	FALSE	CG14230
FBtr0074789	30.7843	31.2116	31.0443	31.1375	31.3516	31.1715	31.4888	31.3652	0.284861	0.684956	-0.299845	FALSE	AP-1-2beta
FBtr0346042;FBtr0074793	29.8966	30.4028	29.9537	30.0334	30.2223	30.1645	30.1422	29.947	0.819329	0.139021	-0.0473541	FALSE	parvin
FBtr0074794;FBtr0331763	26.1407	22.9343	25.6871	25.9521	23.6287	21.8798	21.8798	23.9863	0.31154	0.666099	2.3349	FALSE	Alr
FBtr0335156;FBtr0335157;FBtr0335155;FBtr0074795	27.588	28.2846	28.0114	28.6098	28.9314	28.6444	28.7194	29.2882	0.23812	0.721708	-0.772401	FALSE	Pmp70
FBtr0074799;FBtr0074798	25.9362	28.4505	26.6655	27.6152	26.9872	27.0171	26.818	27.7	0.971776	0.0237843	0.0362837	FALSE	Nup205
FBtr0303996;FBtr0074805;FBtr0303995;FBtr0074804	21.8798	21.8798	21.8798	21.8798	21.8798	21.8798	21.8798	21.8798	0.500905	0	0	FALSE	pico
FBtr0345014;FBtr0074808;FBtr0074807	21.8798	21.8798	21.8798	21.8798	21.8798	21.8798	21.8798	21.8798	0.500905	0	0	FALSE	vfl
FBtr0346378;FBtr0335137;FBtr0074809	21.8798	21.8798	21.8798	21.8798	21.8798	21.8798	21.8798	21.8798	0.500905	0	0	FALSE	CG12702
FBtr0339436;FBtr0339435;FBtr0301703;FBtr0074812	21.8798	21.8798	21.8798	21.8798	21.8798	21.8798	21.8798	21.8798	0.500905	0	0	FALSE	meso18E
FBtr0309218;FBtr0074813	26.7233	26.4734	24.5134	26.6436	26.7561	26.876	27.1	26.961	0.500905	0.504241	-0.834839	FALSE	CG14232
FBtr0309217;FBtr0074814	21.8798	21.8798	21.8798	21.8798	21.8798	21.8798	21.8798	21.8798	0.500905	0	0	FALSE	CG14231
FBtr0074815	22.1107	21.8798	24.0348	24.4059	21.8798	21.8798	23.3614	23.8112	0.774478	0.171668	0.374781	FALSE	CoVIb
FBtr0332690;FBtr0074819	21.8798	23.2893	21.8798	21.8798	21.8798	21.8798	21.8798	21.8798	0.500905	0.353553	0.352385	FALSE	gig
FBtr0074826;FBtr0074825;FBtr0332693	21.8798	21.8798	21.8798	21.8798	21.8798	21.8798	21.8798	21.8798	0.500905	0	0	FALSE	Su(var)3-3
FBtr0074827	21.8798	21.8798	21.8798	21.8798	21.8798	21.8798	21.8798	21.8798	0.500905	0	0	FALSE	CG13813
FBtr0074829;FBtr0074828	21.8798	21.8798	21.8798	22.7112	21.8798	21.8798	21.8798	21.8798	0.500905	0.353553	0.207868	FALSE	CG6951
FBtr0332771;FBtr0301126;FBtr0300813;FBtr0074830	30.1852	30.0362	29.607	30.5586	29.5322	29.6705	29.2092	29.639	0.288739	0.682819	0.584013	FALSE	Clc
FBtr0344228;FBtr0074838;FBtr0074837;FBtr0332775	23.498	21.8798	24.2708	21.8798	21.8798	22.0257	24.4391	21.8798	0.8162	0.14162	0.325974	FALSE	CG6597
FBtr0100318;FBtr0074839	21.8798	21.8798	21.8798	21.8798	24.7275	21.8798	21.8798	21.8798	0.500905	0.353553	-0.711923	FALSE	polo
FBtr0074840	30.5383	30.5948	30.414	30.2772	30.6513	30.6342	30.7895	30.6264	0.266552	0.696211	-0.219301	FALSE	alphaSnap
FBtr0345816;FBtr0074842;FBtr0074841	30.0083	30.2273	29.7549	29.7447	29.9503	30.5039	30.1751	30.0559	0.500905	0.470971	-0.237504	FALSE	Spn77Ba
FBtr0074843	21.8798	21.8798	24.7884	26.2195	27.1709	22.7141	27.2902	27.0356	0.500905	0.492575	-2.36083	FALSE	Spn77Bb
FBtr0074845	21.8798	22.9268	21.8798	21.8798	25.2435	21.8798	21.8798	21.8798	0.670101	0.24254	-0.579176	FALSE	CG32225
FBtr0074846	21.8798	21.8798	21.8798	21.8798	21.8798	21.8798	21.8798	21.8798	0.500905	0	0	FALSE	Pex23
FBtr0074847	21.8798	21.8798	21.8798	21.8798	21.8798	21.8798	21.8798	21.8798	0.500905	0	0	FALSE	FRG1
FBtr0074849	21.8798	21.8798	21.8798	21.8798	21.8798	24.7892	21.8798	21.8798	0.500905	0.353553	-0.727362	FALSE	CG17122
FBtr0074851;FBtr0306328;FBtr0306327;FBtr0074850;FBtr0308204;FBtr0302113;FBtr0306329;FBtr0306326	21.8798	21.8798	21.8798	21.8798	21.8798	21.8798	21.8798	21.8798	0.500905	0	0	FALSE	CG17233
FBtr0332694;FBtr0074855;FBtr0074853;FBtr0310468;FBtr0074854	23.4842	23.2513	22.8653	22.8842	21.8798	21.8798	21.8798	21.8798	0.00715279	0.896904	1.24146	FALSE	CG6933
FBtr0332695;FBtr0074856	21.8798	21.8798	21.8798	21.8798	21.8798	21.8798	21.8798	21.8798	0.500905	0	0	FALSE	CG7017
FBtr0074859	21.8798	21.8798	21.8798	21.8798	21.8798	21.8798	21.8798	21.8798	0.500905	0	0	FALSE	CG7298
FBtr0074864	23.3326	24.0814	24.6075	24.2203	25.9257	23.3961	25.444	22.8965	0.779302	0.168307	-0.355155	FALSE	CG7328
FBtr0332700;FBtr0074867	21.8798	21.8798	21.8798	21.8798	21.8798	21.8798	21.8798	21.8798	0.500905	0	0	FALSE	CG7365
FBtr0302366;FBtr0074872	27.4282	27.7477	27.414	27.647	28.2087	27.7158	27.5702	27.1453	0.787659	0.16181	-0.100783	FALSE	CG14184
FBtr0333877;FBtr0074875;FBtr0074874;FBtr0074873	21.8798	21.8798	24.0327	21.8798	21.8798	21.8798	21.8798	21.8798	0.500905	0.353553	0.538242	FALSE	HLH106
FBtr0074880;FBtr0344256;FBtr0074879	29.5834	29.03	29.1139	29.499	28.5959	29.2294	29.0754	28.8548	0.478651	0.571162	0.367744	FALSE	CG15881
FBtr0074881	28.2306	27.949	27.7246	27.9037	28.0579	27.8521	28.7209	27.992	0.534693	0.331068	-0.203722	FALSE	Kap-alpha1
FBtr0332726;FBtr0310476;FBtr0100666;FBtr0332153;FBtr0074882	21.8798	21.8798	21.8798	21.8798	21.8798	21.8798	21.8798	21.8798	0.500905	0	0	FALSE	Deaf1
FBtr0074884	21.8798	21.8798	21.8798	21.8798	23.6782	24.3478	23.841	23.1545	0.0102122	0.890632	-1.87557	FALSE	kto
FBtr0332147;FBtr0111108;FBtr0074889;FBtr0074888	21.8798	21.8798	21.8798	21.8798	21.8798	21.8798	21.8798	21.8798	0.500905	0	0	FALSE	Papss
FBtr0074891;FBtr0074892	22.5906	24.3918	22.5812	21.8798	21.8798	26.3189	25.9015	22.9597	0.500905	0.398835	-1.40413	FALSE	Prp3
FBtr0074893	32.4828	32.8613	32.9629	32.5958	32.9726	32.8889	32.869	33.1929	0.474011	0.573174	-0.255146	FALSE	Rpn1
FBtr0330181;FBtr0074894	28.9089	28.9244	28.683	28.9262	28.6831	29.1778	28.6849	28.7177	0.837381	0.125713	0.0447426	FALSE	CG7770
FBtr0074895	29.1581	29.0031	29.1376	28.5007	29.3796	29.3799	28.5153	29.1953	0.671975	0.241199	-0.167676	FALSE	Grasp65
FBtr0331800;FBtr0074896	31.5647	31.4427	31.2305	31.6106	31.0123	31.3818	31.181	31.2046	0.341446	0.647572	0.267194	FALSE	RhoGDI
FBtr0074897;FBtr0304746	21.8798	21.8798	21.8798	21.8798	21.8798	21.8798	21.8798	21.8798	0.500905	0	0	FALSE	Ac76E
FBtr0344084;FBtr0074900	28.9372	28.1174	28.175	28.2369	28.602	28.4656	28.2356	28.7294	0.675535	0.238745	-0.141538	FALSE	CG7646
FBtr0074902	28.6995	28.7358	28.6943	28.5633	28.7268	28.2916	28.5339	28.7506	0.564045	0.310943	0.0974882	FALSE	Nca
FBtr0332719;FBtr0074903	29.9471	29.7514	29.3529	29.1473	29.8128	29.8095	29.9844	30.1121	0.463508	0.579552	-0.380051	FALSE	Tom20
FBtr0332720;FBtr0074904	21.8798	21.8798	21.8798	21.8798	21.8798	21.8798	21.8798	23.2398	0.500905	0.353553	-0.340004	FALSE	CG7668
FBtr0344085;FBtr0302049;FBtr0074909;FBtr0074908	32.6527	32.5532	32.605	32.7773	32.6358	32.7656	32.5473	32.5637	0.867254	0.104087	0.0189366	FALSE	CG7433
FBtr0332723;FBtr0074910	34.9105	34.5768	34.413	35.1466	34.088	34.6388	34.4764	34.2901	0.471781	0.57545	0.388393	FALSE	fln
FBtr0074915	27.5992	27.8504	28.2062	28.5213	27.8972	28.3668	28.2899	27.8233	0.900594	0.0779774	-0.04999	FALSE	CG8004
FBtr0074916;FBtr0074917	21.8798	21.8798	21.8798	21.8798	21.8798	21.8798	21.8798	21.8798	0.500905	0	0	FALSE	Su(z)12
FBtr0074918	21.8798	27.2281	27.535	21.8798	27.1349	27.6653	27.6429	27.6518	0.500905	0.556725	-2.89308	FALSE	Mtr3
FBtr0332152;FBtr0302046;FBtr0074919;FBtr0100394	28.359	28.275	28.8219	27.6852	28.9572	27.0078	28.3671	28.9544	0.967561	0.0269426	-0.0363682	FALSE	Mi-2
FBtr0344257;FBtr0302047;FBtr0074920	21.8798	21.8798	21.8798	21.8798	21.8798	21.8798	21.8798	21.8798	0.500905	0	0	FALSE	Su(Tpl)
FBtr0308833;FBtr0074921;FBtr0308832	27.2902	27.6596	27.6174	28.3396	27.8146	28.0105	27.7715	28.0156	0.61223	0.280032	-0.176381	FALSE	Rab8
FBtr0074922;FBtr0332154	27.6822	27.7579	27.7178	27.8523	27.7914	27.8068	27.7297	28.062	0.500905	0.399423	-0.0949445	FALSE	trc
FBtr0074925	24.1004	26.4457	24.211	26.6711	26.234	26.5828	26.4677	21.8798	0.976901	0.0188724	0.0659841	FALSE	Cyp305a1
FBtr0333878;FBtr0074927	27.7218	27.7011	22.3294	27.0959	27.3716	27.1998	27.6257	27.3586	0.546268	0.323113	-1.17686	FALSE	CG14103
FBtr0074928	21.8798	21.8798	21.8798	21.8798	22.6167	21.8798	22.7379	24.1277	0.426245	0.600035	-0.960761	FALSE	CG14102
FBtr0074933	24.9327	24.1907	24.941	24.7392	25.0417	24.4093	24.364	21.8798	0.500905	0.376975	0.7772	FALSE	Cpr76Bb
FBtr0074937;FBtr0074936	21.8798	21.8798	21.8798	21.8798	24.4172	22.8937	21.8798	21.8798	0.500905	0.48394	-0.887837	FALSE	Rcd7
FBtr0074938	21.8798	21.8798	21.8798	21.8798	21.8798	21.8798	22.4017	24.664	0.500905	0.423754	-0.826536	FALSE	CG9300
FBtr0074940	28.1541	27.5292	28.5387	28.6341	28.3214	28.4117	28.3274	28.9262	0.510624	0.346353	-0.282618	FALSE	CG9330
FBtr0074941;FBtr0333272	25.9606	23.7763	25.5319	25.9296	23.8204	23.9723	25.4022	25.6196	0.568666	0.307784	0.595924	FALSE	Taf6
FBtr0074942;FBtr0074944;FBtr0336786	23.7924	23.8495	23.2465	22.943	23.7366	21.8798	23.6223	24.4565	0.973028	0.0220764	0.0340584	FALSE	CG9368
FBtr0074945	27.6917	28.1229	28.3902	28.4073	28.2972	27.6897	28.5313	27.7424	0.838258	0.124907	0.0878887	FALSE	CG9372
FBtr0074946	21.8798	21.8798	21.8798	21.8798	21.8798	21.8798	21.8798	21.8798	0.500905	0	0	FALSE	CG9376
FBtr0302381;FBtr0074947	25.3774	26.0302	24.8558	26.0088	24.0495	26.3901	25.5975	25.8454	0.920438	0.0644961	0.0974125	FALSE	asf1
FBtr0074948	21.8798	22.6615	21.8798	21.8798	26.2901	26.2697	24.3785	21.8798	0.312842	0.665289	-2.62932	FALSE	ms(3)76Cc
FBtr0074949	31.3829	31.3698	31.3628	31.5051	31.4095	31.3172	31.516	31.5831	0.616778	0.277094	-0.0512942	FALSE	Gbeta76C
FBtr0302283;FBtr0074952	23.161	23.4203	25.6477	21.8798	24.2045	23.2639	24.4554	26.0181	0.505158	0.350058	-0.958271	FALSE	CG42638;Trpml
FBtr0333862;FBtr0074953	31.9574	31.188	31.0022	31.5013	30.9077	31.111	30.3229	30.5651	0.306067	0.669811	0.685541	FALSE	serp
FBtr0074961	31.0947	30.8921	30.8481	30.6441	31.0499	31.0819	30.7409	30.7026	0.916394	0.0674119	-0.02408	FALSE	Oat
FBtr0074962;FBtr0331862;FBtr0290116;FBtr0306354	21.8798	21.8798	21.8798	21.8798	21.8798	21.8798	21.8798	21.8798	0.500905	0	0	FALSE	CG8786
FBtr0333896;FBtr0074966	26.4151	26.3047	26.517	26.2447	26.6717	26.3197	26.17	26.5662	0.765152	0.178475	-0.0615213	FALSE	l(3)76BDm
FBtr0074971	26.5221	26.2972	22.4354	27.1557	24.1808	26.4747	25.4981	25.5729	0.932185	0.0556603	0.170945	FALSE	CG14100
FBtr0344994;FBtr0074972	29.7179	29.6581	29.6941	30.002	29.6112	29.7563	29.8952	29.8845	0.913588	0.0692602	-0.0187695	FALSE	CG9231
FBtr0074973;FBtr0333273;FBtr0112853	25.7416	22.7189	24.1277	24.9943	24.8908	22.8741	24.2102	25.182	0.939849	0.0489996	0.106347	FALSE	Shal
FBtr0074974	26.501	26.4637	27.3043	26.8926	24.2635	26.7303	27.3743	27.7062	0.834685	0.128052	0.271823	FALSE	l(3)76BDr
FBtr0074978	25.7309	21.8798	21.8798	24.783	21.8798	24.2715	21.8798	21.8798	0.528334	0.335231	1.09066	FALSE	CG9452
FBtr0333845;FBtr0074979	21.8798	21.8798	21.8798	21.8798	21.8798	21.8798	21.8798	21.8798	0.500905	0	0	FALSE	CG9451
FBtr0074984;FBtr0333844;FBtr0074930	26.9328	27.3555	27.4964	27.664	26.8764	27.7563	26.7827	26.8332	0.500905	0.374954	0.30003	FALSE	CG18294;CG12519
FBtr0074987	30.7299	31.6462	31.4147	32.6647	31.6274	32.4204	31.6747	30.9158	0.958048	0.0345428	-0.0457066	FALSE	CG14095
FBtr0344993;FBtr0331852;FBtr0074988	29.7096	29.4434	29.692	29.5555	30.0574	30.2289	30.1237	30.4711	0.034937	0.85764	-0.62016	FALSE	rept
FBtr0074990;FBtr0074989	21.8798	21.8798	21.8798	21.8798	21.8798	21.8798	21.8798	21.8798	0.500905	0	0	FALSE	Bet1
FBtr0344454;FBtr0074991	21.8798	21.8798	21.8798	21.8798	21.8798	21.8798	21.8798	21.8798	0.500905	0	0	FALSE	CG9666
FBtr0074998	21.8798	21.8798	21.8313	21.8798	21.8798	21.8798	23.0121	22.6494	0.500905	0.53615	-0.487603	FALSE	Chd3
FBtr0075003	21.8798	21.8798	21.8798	21.8798	21.8798	21.8798	21.8798	21.8798	0.500905	0	0	FALSE	pip
FBtr0075005	21.8798	21.8798	21.8798	21.8798	21.8798	21.8798	21.8798	21.8798	0.500905	0	0	FALSE	pip
FBtr0075007	21.8798	21.8798	21.8798	21.8798	21.8798	21.8798	21.8798	21.8798	0.500905	0	0	FALSE	pip
FBtr0075008	21.8798	21.8798	21.8798	21.8798	21.8798	21.8798	21.8798	21.8798	0.500905	0	0	FALSE	pip
FBtr0075009	21.8798	21.8798	21.8798	21.8798	21.8798	21.8798	21.8798	21.8798	0.500905	0	0	FALSE	pip
FBtr0075012	21.8798	21.8798	21.8798	21.8798	21.8798	21.8798	21.8798	21.8798	0.500905	0	0	FALSE	pip
FBtr0333897;FBtr0075013	21.8798	21.8798	21.8798	21.8798	21.8798	21.8798	21.8798	21.8798	0.500905	0	0	FALSE	pip
FBtr0345390;FBtr0332155;FBtr0331425;FBtr0075014	26.0992	26.3414	24.819	26.4362	21.8798	21.8798	21.8798	21.8798	0.00210832	0.91217	4.04416	TRUE	Gbs-76A
FBtr0075017	32.2456	31.9244	31.9808	32.006	31.743	31.7962	31.6366	31.6759	0.101031	0.803975	0.326288	FALSE	CG9629
FBtr0345391;FBtr0310276;FBtr0075018	21.8798	21.8798	21.8798	21.8798	21.8798	21.8798	21.8798	21.8798	0.500905	0	0	FALSE	Max
FBtr0075021;FBtr0075020;FBtr0075019	25.3286	25.8614	24.8315	22.0588	25.8384	25.6646	26.8578	26.2843	0.489541	0.563484	-1.64123	FALSE	nes
FBtr0346548;FBtr0333224;FBtr0075022	29.1088	28.5928	29.0142	28.6701	28.9463	28.9893	29.2392	29.0458	0.500905	0.480803	-0.208683	FALSE	mRpL21
FBtr0075024	26.3364	24.4144	24.196	23.7325	21.8798	21.8798	21.8798	21.8798	0.057902	0.835511	2.79004	FALSE	CG14075
FBtr0075025	28.5571	29.6248	29.3082	28.5694	29.5074	29.0296	29.8086	30.1391	0.500905	0.532625	-0.606286	FALSE	CG6812
FBtr0075026;FBtr0330090	27.9032	27.5828	27.8527	27.2232	24.8263	26.1819	21.8798	27.2059	0.369593	0.631895	2.61696	FALSE	MESR6
FBtr0332735;FBtr0330194;FBtr0299586;FBtr0112890;FBtr0075029;FBtr0075028;FBtr0330195	22.9778	21.8798	24.3153	21.8798	21.8798	23.624	23.8727	23.8387	0.638074	0.263974	-0.540639	FALSE	fz2
FBtr0330093;FBtr0075032	21.8798	21.8798	21.8798	21.8798	21.8798	21.8798	21.8798	21.8798	0.500905	0	0	FALSE	Gem2
FBtr0075033	28.478	29.4732	29.0987	28.8039	29.3914	28.9444	29.5917	29.1566	0.500905	0.41405	-0.307556	FALSE	CG10424
FBtr0075034	27.1179	24.7807	22.8454	27.6851	23.4818	22.6202	23.741	24.9269	0.500905	0.506974	1.91478	FALSE	CG11577
FBtr0333220;FBtr0075035;FBtr0330089	23.5667	21.8798	23.3136	22.5388	23.8162	23.9086	25.5582	25.1908	0.224213	0.730291	-1.79373	FALSE	Mkp3
FBtr0308781;FBtr0075038	21.8798	21.8798	25.0463	25.3547	28.4191	28.0133	27.7867	28.081	0.0657202	0.828663	-4.53492	FALSE	Acp76A
FBtr0075040	28.6866	29.3792	29.3303	29.3889	29.1832	28.5476	29.0341	29.6845	0.859567	0.109895	0.0838934	FALSE	CG18136
FBtr0075041	25.0167	26.1988	25.3806	25.7206	23.6282	24.4728	21.8798	23.3427	0.130185	0.78466	2.24832	FALSE	CG3808
FBtr0075043;FBtr0332651;FBtr0075042;FBtr0075044;FBtr0075045	29.8441	29.5721	29.7874	29.6355	28.9858	29.1472	29.1018	29.1061	0.00608942	0.899805	0.624567	FALSE	CG18135
FBtr0333710;FBtr0075048	21.8798	21.8798	21.8798	21.8798	21.8798	21.8798	21.8798	21.8798	0.500905	0	0	FALSE	CG3819
FBtr0331420;FBtr0331422;FBtr0331421;FBtr0075049	21.8798	21.8798	21.8798	21.8798	24.3181	22.6248	22.9529	23.6446	0.110506	0.797514	-1.50533	FALSE	MYPT-75D
FBtr0075050	22.9646	21.8798	23.7789	21.8798	21.8798	21.8798	21.8798	23.0147	0.568786	0.307648	0.462254	FALSE	GNBP1
FBtr0075051	21.8798	21.8798	21.8798	21.8798	21.8798	21.8798	21.8798	21.8798	0.500905	0	0	FALSE	CG32202
FBtr0075053	21.8798	21.8798	21.8798	21.8798	21.8798	21.8798	21.8798	21.8798	0.500905	0	0	FALSE	CG6885
FBtr0075054	24.3986	21.8798	21.8798	21.8798	21.8798	21.8798	21.8798	21.8798	0.500905	0.353553	0.629695	FALSE	MED11
FBtr0075055	28.5965	28.8127	28.8071	28.489	28.5496	28.6933	28.6153	28.4413	0.500905	0.369652	0.101486	FALSE	Atg3
FBtr0075057;FBtr0075056	21.8798	21.8798	21.8798	21.8798	21.8798	21.8798	21.8798	21.8798	0.500905	0	0	FALSE	HipHop
FBtr0075058	35.2603	35.2209	35.1276	34.9706	35.0163	34.9436	34.7263	34.7309	0.23812	0.720723	0.290568	FALSE	Cat
FBtr0308813;FBtr0075063	29.9539	29.2244	29.8997	30.1419	29.0276	29.5641	28.7795	28.8358	0.254033	0.704516	0.753185	FALSE	CG6852
FBtr0075064	29.7757	30.3467	30.2556	29.9025	30.5229	30.4535	30.619	30.6498	0.173672	0.759218	-0.491146	FALSE	Ugt
FBtr0333709;FBtr0075066	33.092	33.1095	33.1941	33.3546	32.9813	32.8942	33.1654	33.1579	0.500905	0.496109	0.137838	FALSE	RpL26
FBtr0346816;FBtr0075068	25.0471	25.569	25.6743	26.5675	26.4426	26.3047	27.4535	27.0925	0.278698	0.688576	-1.10889	FALSE	CG6841
FBtr0075069	21.8798	21.8798	21.8798	21.8798	21.8798	21.8798	21.8798	21.8798	0.500905	0	0	FALSE	CG6839
FBtr0075074	26.6237	27.182	27.1386	27.4264	27.3925	27.6765	28.0993	28.417	0.250089	0.709132	-0.80366	FALSE	CSN1b
FBtr0075076	33.0295	32.5896	33.0392	32.8412	32.7634	32.8906	32.8316	32.7666	0.719463	0.209658	0.0617992	FALSE	CG3902
FBtr0075081;FBtr0301857;FBtr0075083;FBtr0075082	27.0277	27.9465	27.851	27.1157	28.3623	27.4041	28.201	28.1548	0.500905	0.532646	-0.545307	FALSE	Indy
FBtr0304627;FBtr0075087;FBtr0075086;FBtr0347045	21.8798	21.8798	21.8798	21.8798	23.9439	21.8798	21.8798	21.8798	0.500905	0.353553	-0.516024	FALSE	ftz-f1
FBtr0345812;FBtr0075091	26.7369	27.4126	27.4503	27.1859	27.0234	27.4823	26.4566	25.9645	0.500905	0.427583	0.464727	FALSE	Cyp12c1
FBtr0345383;FBtr0075092	28.662	28.2689	28.2678	29.1129	28.3819	28.8045	28.4911	28.3774	0.861272	0.108378	0.0642114	FALSE	Chmp1
FBtr0345806;FBtr0075098	29.8631	29.8888	29.3386	29.3803	29.859	29.5388	28.7462	29.2491	0.517039	0.342583	0.269465	FALSE	Capr
FBtr0075101;FBtr0075112	21.8798	21.8798	21.8798	21.8798	21.8798	21.8798	21.8798	21.8798	0.500905	0	0	FALSE	CG7271;term
FBtr0075108	21.8798	21.8798	21.8798	21.8798	21.8798	21.8798	21.8798	21.8798	0.500905	0	0	FALSE	bora
FBtr0075116;FBtr0075115	21.8798	21.8798	21.8798	21.8798	21.8798	21.7878	24.0621	21.8798	0.526573	0.336332	-0.522586	FALSE	Met75Cb;Met75Ca
FBtr0075117	30.3015	29.4616	29.8397	30.2799	29.5194	29.6159	29.5971	29.5407	0.442447	0.590927	0.402387	FALSE	CG4306
FBtr0075121	28.1496	27.9298	27.1432	28.077	27.6574	25.1885	24.3604	27.3213	0.435156	0.595432	1.69298	FALSE	mRpS26
FBtr0075124;FBtr0075123	21.8798	21.8798	21.8798	21.8798	21.8798	21.8798	21.8798	21.8798	0.500905	0	0	FALSE	CG7341
FBtr0333697;FBtr0333696;FBtr0075125	27.4843	27.1247	27.4088	26.8215	27.4982	26.8909	27.1125	27.5362	0.890101	0.0869901	-0.0496003	FALSE	CG32195
FBtr0332861;FBtr0075127	21.8798	21.8798	21.8798	21.8798	23.3561	23.6872	21.8798	24.0375	0.246744	0.711303	-1.36035	FALSE	CG7330
FBtr0075129	24.3622	21.8798	23.3266	23.5657	21.8798	24.721	22.8577	23.5832	0.984443	0.0111592	0.0231363	FALSE	CheA75a
FBtr0075132	21.8798	21.8798	21.8798	21.8798	26.2667	24.5453	24.177	26.2296	0.0236946	0.870501	-3.42488	FALSE	CG5103
FBtr0332863;FBtr0075135	21.8798	21.8798	21.8798	21.8798	23.5694	23.6266	24.7994	27.1566	0.166709	0.763968	-2.90825	FALSE	Cyp312a1
FBtr0331810;FBtr0075140	34.6699	34.7806	34.5119	34.5598	34.7046	34.4123	34.3517	34.3431	0.500905	0.534246	0.177672	FALSE	CG7430
FBtr0331811;FBtr0075141	28.6333	27.8918	28.6193	28.6431	29.4816	29.5092	29.1604	29.289	0.075041	0.821809	-0.913205	FALSE	CG7441
FBtr0300282;FBtr0300281;FBtr0075142	27.2491	26.7216	26.8399	26.6722	23.8376	26.9492	26.6595	26.9846	0.504863	0.350244	0.762991	FALSE	CG7408
FBtr0075143	25.8072	24.0009	24.9627	23.6288	21.8798	23.097	21.8798	24.0493	0.29018	0.681328	1.87346	FALSE	CG7402
FBtr0075144	21.8798	21.8798	21.8798	21.8798	24.9065	23.6136	26.0732	26.2488	0.0384577	0.853477	-3.33075	FALSE	CG14353
FBtr0075152	21.8798	21.8798	24.3123	23.8539	21.8798	21.8798	23.41	22.8836	0.685726	0.231745	0.468163	FALSE	CG5290
FBtr0075153	21.8798	21.8798	21.8798	21.8798	21.8798	21.8798	21.8798	21.8798	0.500905	0	0	FALSE	Prestin
FBtr0075155;FBtr0075154	23.1135	26.6935	25.9934	25.8408	26.9257	26.2036	26.5911	26.8369	0.500905	0.495146	-1.229	FALSE	Tsp74F
FBtr0075157	28.0072	27.9709	28.4928	28.081	27.388	28.7747	28.0973	27.9987	0.886077	0.0903627	0.073328	FALSE	CG5506
FBtr0075159;FBtr0273277	23.2176	22.774	23.9371	23.6164	21.8798	23.7559	24.1976	24.2439	0.895854	0.0827421	-0.133038	FALSE	CG5535
FBtr0345815;FBtr0075160	23.8147	22.4583	21.8798	21.9901	24.3657	23.9374	24.9325	23.6339	0.204491	0.742459	-1.68169	FALSE	MED19
FBtr0075161	29.0403	28.9662	28.6418	29.0275	28.6698	28.5134	28.7202	28.8879	0.500905	0.55806	0.221134	FALSE	CG5567
FBtr0347063;FBtr0075162	27.4162	27.2826	27.6262	27.2954	27.0452	27.1447	27.4299	27.1369	0.481891	0.568193	0.21589	FALSE	CG5577
FBtr0075170	21.8798	21.8798	21.8798	21.8798	21.8798	21.8798	21.8798	21.8798	0.500905	0	0	FALSE	CG5589
FBtr0075171	28.808	28.6973	28.4101	28.6466	27.8293	28.321	26.7708	26.0707	0.270572	0.693023	1.39253	FALSE	NUCB1
FBtr0345118;FBtr0345117;FBtr0302041;FBtr0075173	21.8798	25.5204	23.332	21.8798	25.6362	23.0519	23.9065	23.1604	0.62124	0.274039	-0.785768	FALSE	Oatp74D
FBtr0345387;FBtr0344941;FBtr0331842;FBtr0075175	21.8798	26.6694	27.2611	24.8458	26.6133	23.1944	26.4368	26.4202	0.83241	0.129711	-0.502127	FALSE	CG7564
FBtr0075184	28.6431	28.7115	28.4369	28.2116	28.5215	28.564	28.3952	28.3819	0.859816	0.109668	0.0351331	FALSE	CG7484
FBtr0333692;FBtr0075187	26.6088	26.1946	25.7752	26.628	26.1872	26.1827	25.6737	26.3679	0.601	0.287496	0.19875	FALSE	CG7460
FBtr0075191;FBtr0075190	30.6751	30.7492	30.5918	30.2447	30.9316	30.5525	30.3924	30.2591	0.919887	0.0649923	0.0312784	FALSE	Adgf-A
FBtr0345384;FBtr0075196;FBtr0330162	21.8798	21.8798	21.8798	21.8798	21.8798	21.8798	21.8798	21.8798	0.500905	0	0	FALSE	Crtc
FBtr0075199;FBtr0304977;FBtr0075200	31.1012	30.6406	31.0658	31.2993	30.6771	30.7088	30.6381	30.7998	0.369593	0.632211	0.320767	FALSE	Pep
FBtr0333123;FBtr0075201	27.9825	27.611	27.5522	28.3652	27.3748	27.6214	27.1187	27.1421	0.300154	0.673069	0.563466	FALSE	Vps60
FBtr0333124;FBtr0075205;FBtr0333125;FBtr0075206	21.8798	21.8798	21.8798	21.8798	21.8798	21.8798	21.8798	21.8798	0.500905	0	0	FALSE	CycT
FBtr0075207	27.4097	27.1617	27.14	26.6494	23.1525	25.2508	25.7107	25.4621	0.146837	0.773698	2.19617	FALSE	Jon74E
FBtr0075208	25.7891	23.5638	23.2577	21.8798	23.8674	21.8798	24.4408	23.3814	0.887005	0.0894871	0.23026	FALSE	Edc3
FBtr0075209	27.2635	27.0659	23.7959	24.4375	26.3878	23.4618	21.8798	26.0399	0.566416	0.309402	1.19838	FALSE	U4-U6-60K
FBtr0075217	30.22	30.3619	30.8772	30.2137	30.6706	30.7634	30.2248	30.5776	0.638915	0.263307	-0.140871	FALSE	CG7630
FBtr0075218	23.6632	21.8798	21.8798	21.8798	21.8798	21.8798	21.8798	21.8798	0.500905	0.353553	0.445844	FALSE	CG32176
FBtr0075220	31.3767	30.8156	31.618	31.6397	31.0444	31.3298	31.5946	31.5455	0.967724	0.0268024	-0.0160888	FALSE	CG7603
FBtr0333691;FBtr0302510;FBtr0302509;FBtr0075222	33.8323	33.57	33.7196	33.8682	33.6324	33.6558	33.5164	33.6871	0.500905	0.5168	0.124606	FALSE	CG7580
FBtr0075226	21.8798	21.8798	21.8798	21.8798	21.8798	23.9847	23.251	23.5126	0.25163	0.70682	-1.27724	FALSE	CG12229
FBtr0307343;FBtr0299819;FBtr0075227	27.2937	27.0005	27.2012	26.8536	27.4141	27.2073	27.6056	27.1122	0.500905	0.527318	-0.247564	FALSE	CG32174
FBtr0075229	28.2531	23.7215	28.4404	28.4069	23.8497	23.7132	22.9715	24.5924	0.251385	0.707589	3.42375	FALSE	CG33052
FBtr0075231	26.2854	26.5776	26.604	25.8046	26.2179	26.3337	26.7378	26.806	0.560205	0.313823	-0.20596	FALSE	Sec3
FBtr0075238	21.8798	21.8798	21.8798	21.8798	21.8798	21.8798	21.8798	21.8798	0.500905	0	0	FALSE	CG13728
FBtr0309231;FBtr0075240;FBtr0075239	21.8798	21.8798	21.8798	21.8798	21.8798	21.8798	21.8798	21.8798	0.500905	0	0	FALSE	Cad74A
FBtr0075246;FBtr0075245;FBtr0331847	21.8798	21.8798	21.8798	21.8798	21.8798	21.8798	21.8798	21.8798	0.500905	0	0	FALSE	CG6479
FBtr0075249	21.8798	21.8798	21.8798	21.8798	21.8798	22.2013	23.8508	23.9358	0.436441	0.59452	-1.08716	FALSE	CG6485
FBtr0075251;FBtr0075252	31.4185	31.5756	31.6189	31.5882	31.3425	31.5989	31.6179	31.7632	0.850126	0.11688	-0.030316	FALSE	CG6512
FBtr0075261	21.8798	21.8798	21.8798	21.8798	21.8798	21.8798	21.8798	21.8798	0.500905	0	0	FALSE	CG13028
FBtr0075269;FBtr0075267	28.8681	28.5977	29.3253	28.942	29.0905	29.5317	29.6725	29.3044	0.339317	0.649629	-0.466501	FALSE	Nc73EF
FBtr0075274	21.8798	21.8798	21.8798	21.8798	23.9477	21.8798	21.8798	21.8798	0.500905	0.353553	-0.516984	FALSE	CG7728
FBtr0075275	27.4016	27.9967	27.9168	28.1313	27.6894	28.2299	28.8552	28.2073	0.500905	0.448271	-0.383826	FALSE	Fit2
FBtr0075278	27.7663	27.9878	27.4881	27.6941	27.6296	26.0231	27.1466	27.556	0.500905	0.528363	0.645259	FALSE	beg
FBtr0075283;FBtr0075282	26.8765	27.9186	27.014	27.3588	27.3023	27.3155	27.8247	27.3434	0.708035	0.217053	-0.154467	FALSE	rogdi
FBtr0075284	26.8274	27.4895	27.0968	27.3265	27.1539	26.5003	27.0559	27.5625	0.779744	0.167683	0.116863	FALSE	CG7724
FBtr0075285;FBtr0333861;FBtr0113427;FBtr0290066;FBtr0310006;FBtr0113428;FBtr0310005	28.4466	27.0988	28.2711	28.5123	27.3528	28.1915	27.456	27.6425	0.500905	0.385276	0.421513	FALSE	Rbp6
FBtr0075286;FBtr0300718	21.8798	21.8798	21.8798	21.8798	21.8798	21.8798	21.8798	21.8798	0.500905	0	0	FALSE	CG14057
FBtr0075290	26.1599	25.777	23.3757	26.9655	21.8798	23.3661	21.8798	21.8798	0.121819	0.790543	3.31816	FALSE	a10
FBtr0075291	21.8798	21.8798	21.8798	21.8798	25.1715	23.4414	25.8086	21.8798	0.312882	0.665116	-2.19554	FALSE	CG6652
FBtr0075295;FBtr0075294;FBtr0075293	21.8798	23.5386	23.7831	21.8798	25.8851	24.3413	21.8798	22.3045	0.605606	0.284344	-0.832375	FALSE	CG6664
FBtr0332122;FBtr0075297;FBtr0321285	23.0601	22.8324	24.0146	21.8798	21.8798	21.8798	21.8798	21.8798	0.323463	0.659413	1.06694	FALSE	CG3764
FBtr0113174;FBtr0075305;FBtr0075300;FBtr0305577	21.8798	21.8798	21.8798	21.8798	21.8798	21.8798	21.8798	21.8798	0.500905	0	0	FALSE	CG11905
FBtr0113173;FBtr0075304;FBtr0075301	21.8798	21.8798	23.4805	21.8798	21.8798	21.8798	21.8798	21.8798	0.500905	0.353553	0.40017	FALSE	CG11905
FBtr0075306;FBtr0075303;FBtr0075302	21.8798	21.8798	21.8798	21.8798	21.8798	21.8798	21.8798	21.8798	0.500905	0	0	FALSE	CG11905
FBtr0345805;FBtr0075307	27.8924	27.6185	27.1369	28.1181	28.1581	27.2112	25.7215	26.1837	0.500905	0.487318	0.872837	FALSE	CG13023
FBtr0075308	30.9275	31.0652	30.7909	30.801	31.0682	31.028	31.0992	30.8446	0.500905	0.444856	-0.113845	FALSE	Rpn12
FBtr0331557;FBtr0075309	35.3285	35.3793	35.48	35.4076	35.3919	35.3969	35.3222	35.3497	0.53392	0.33161	0.0336968	FALSE	CG4169
FBtr0075313;FBtr0331559;FBtr0345368;FBtr0331558;FBtr0075312	29.1712	29.7188	29.8766	29.2267	29.9407	29.6599	30.3175	30.018	0.385808	0.623013	-0.485712	FALSE	CG32164;CG32165
FBtr0305084;FBtr0305086;FBtr0333625;FBtr0333626;FBtr0305085;FBtr0075318;FBtr0330190;FBtr0330189	21.8798	21.8798	21.8798	21.8798	21.8798	21.8798	21.8798	23.6909	0.500905	0.353553	-0.452781	FALSE	Dab
FBtr0075319	23.1012	23.269	27.3174	23.6375	23.998	27.8896	22.5174	22.0757	0.940367	0.048539	0.211103	FALSE	CG13031
FBtr0075320	21.8798	21.8798	21.8798	21.8798	21.8798	21.8798	21.8798	21.8798	0.500905	0	0	FALSE	PGRP-SB2
FBtr0075321	27.9512	27.6029	27.8589	28.1746	26.0254	26.6374	27.7303	27.1177	0.276249	0.690357	1.01919	FALSE	CG9701
FBtr0304018;FBtr0075323;FBtr0075322	28.446	28.3034	27.9182	27.0037	28.3861	28.2272	28.2017	28.057	0.544181	0.324455	-0.300191	FALSE	Nrt
FBtr0333607;FBtr0075325;FBtr0075324	28.4295	28.4563	29.0435	29.1515	28.478	28.9631	29.0849	28.3723	0.91677	0.0670205	0.0456121	FALSE	CG9705
FBtr0075327;FBtr0075326	21.8798	22.8208	21.8798	21.8798	25.82	26.3333	26.7543	27.4037	0.00199365	0.912656	-4.46279	TRUE	CG9706
FBtr0305912;FBtr0075328	30.0266	29.9439	29.9237	30.3492	30.878	30.9215	30.8525	30.492	0.0459486	0.845853	-0.725164	FALSE	nudC
FBtr0075329	28.0765	28.2893	28.1539	28.3813	28.3616	28.1923	28.4534	28.3982	0.500905	0.470908	-0.126116	FALSE	TSG101
FBtr0075330	21.8798	21.8798	21.8798	21.8798	21.8798	21.8798	21.8798	21.8798	0.500905	0	0	FALSE	CG9715
FBtr0344230;FBtr0075333;FBtr0075332	21.8798	21.8798	21.8798	21.8798	21.8798	21.8798	21.8798	21.8798	0.500905	0	0	FALSE	sina
FBtr0075337	24.201	24.8973	21.8798	21.8798	21.8798	21.8798	24.5368	23.0175	0.811669	0.144887	0.385988	FALSE	CG9951
FBtr0075338	23.7807	21.8798	23.0394	21.8798	21.8798	23.4695	23.5894	23.8411	0.56893	0.30748	-0.550028	FALSE	Rh4
FBtr0075344;FBtr0075341	21.8798	21.8798	23.9322	23.0178	21.8798	25.0912	21.8798	26.0621	0.556328	0.316349	-1.05084	FALSE	CG9674
FBtr0075345	30.9684	31.6308	31.4634	31.3137	31.6651	31.4586	31.6486	31.6219	0.500905	0.535555	-0.254479	FALSE	Int6
FBtr0333610;FBtr0075346	21.8798	21.8798	21.8798	21.8798	21.8798	21.8798	21.8798	21.8798	0.500905	0	0	FALSE	CG13025
FBtr0075347	24.0359	23.7766	23.6606	25.3409	23.2726	24.2372	24.6962	22.7696	0.604484	0.28526	0.459615	FALSE	Dbp73D
FBtr0075348	27.4401	27.2143	27.3807	27.6162	26.574	26.1772	27.0283	26.5885	0.0901533	0.810951	0.820802	FALSE	PGRP-SB1
FBtr0075352;FBtr0075351;FBtr0075353	28.2131	28.2471	28.3432	28.0187	28.5225	28.5263	28.593	28.2248	0.321389	0.660908	-0.261079	FALSE	zetaCOP
FBtr0075356;FBtr0075355	21.8798	26.5108	25.5687	22.9044	23.2603	25.5728	26.348	22.5072	0.932681	0.0552011	-0.206162	FALSE	Baldspot
FBtr0345369;FBtr0075357;FBtr0112790;FBtr0330130;FBtr0330133;FBtr0330135;FBtr0330134;FBtr0330132;FBtr0330131;FBtr0330136	21.8798	21.8798	21.8798	21.8798	21.8798	21.8798	21.8798	21.8798	0.500905	0	0	FALSE	Abl
FBtr0331560;FBtr0075358	31.4143	31.5473	31.2972	30.9748	31.5296	31.2772	31.6265	31.3321	0.546122	0.323315	-0.132972	FALSE	Mo25
FBtr0075359	29.2323	29.2993	29.3019	28.7893	29.1114	29.6774	29.3947	29.378	0.500905	0.461413	-0.234669	FALSE	Su(P)
FBtr0075360	32.3413	32.0009	32.2832	32.5452	31.9551	32.3724	32.6559	32.2122	0.983588	0.0129409	-0.00626391	FALSE	Prosbeta6
FBtr0075361	26.7309	27.059	26.9629	26.1222	21.8798	21.8798	21.8798	21.8798	3.75047e-05	0.930152	4.83897	TRUE	CG4098
FBtr0075363	21.8798	21.8798	21.8798	21.8798	21.8798	21.8798	21.8798	21.8798	0.500905	0	0	FALSE	spd-2
FBtr0075365	21.8798	23.4939	21.8798	21.8798	21.8798	21.8798	21.8798	21.8798	0.500905	0.353553	0.403529	FALSE	Syx8
FBtr0075432;FBtr0075370	27.6948	28.4363	27.7212	27.6391	28.9634	27.9962	26.9578	26.9594	0.855889	0.112662	0.15367	FALSE	CG13041;CG13060
FBtr0075371	23.5414	23.5999	23.7016	26.6391	24.3967	21.8798	21.8798	21.8798	0.477453	0.571654	1.86149	FALSE	CG13059
FBtr0075375	29.0056	28.7876	28.773	30.2779	28.5169	29.0909	29.0396	28.7403	0.524625	0.33774	0.364081	FALSE	retinin
FBtr0075376	26.2124	26.8406	21.8798	23.8797	21.8798	23.0883	25.3741	23.8457	0.567647	0.308449	1.15615	FALSE	CG13056
FBtr0075377;FBtr0110866	23.6964	21.8798	26.6415	21.8798	23.3683	24.8404	26.5475	27.1872	0.500905	0.460334	-1.96147	FALSE	CG4998
FBtr0075378	21.8798	21.8798	21.8798	21.8798	21.8798	21.8798	21.8798	21.8798	0.500905	0	0	FALSE	CG33257
FBtr0075379	30.466	30.1589	30.4489	30.5354	29.9649	30.1096	29.7424	29.9905	0.111406	0.796732	0.450463	FALSE	mRpS34
FBtr0075381	27.3619	27.1613	27.776	27.6719	27.466	27.0734	27.4912	27.9572	0.989925	0.00688966	-0.00413867	FALSE	CG4933
FBtr0075382	26.402	25.9769	26.2321	26.8909	26.0893	25.8405	25.3926	26.2466	0.500905	0.554415	0.483224	FALSE	Cpr72Ea
FBtr0075383	21.8798	21.8798	21.8798	21.8798	21.8798	21.8798	21.8798	21.8798	0.500905	0	0	FALSE	Cpr72Eb
FBtr0075384	28.3416	28.1336	28.4169	28.5834	28.3079	28.4168	28.2047	28.6549	0.901936	0.0769968	-0.0271569	FALSE	CG4842
FBtr0333596;FBtr0075387;FBtr0075386	23.61	23.7916	24.2639	24.2322	26.3811	26.2021	26.8985	24.0522	0.239212	0.718965	-1.90903	FALSE	RAF2
FBtr0075390	26.6983	26.9528	27.3692	26.5718	21.8798	24.8153	27.1941	27.2943	0.500905	0.423867	1.60216	FALSE	CG33158
FBtr0075391	21.8798	24.5284	24.2758	21.8798	21.8798	21.8798	23.3249	21.8705	0.500905	0.385303	0.902198	FALSE	st
FBtr0305570;FBtr0305569;FBtr0075394;FBtr0075393;FBtr0330137	28.3481	27.7625	28.0782	28.7936	27.8535	28.7946	28.1132	28.0414	0.929708	0.0571409	0.0449438	FALSE	mbf1
FBtr0329921;FBtr0075395	22.2382	21.8798	21.8798	23.4104	23.6582	21.8798	21.8798	23.9399	0.630761	0.26824	-0.487387	FALSE	Smn
FBtr0345813;FBtr0075399;FBtr0075398	31.5166	31.0415	30.9428	31.4908	31.0411	31.1169	31.0559	31.1094	0.500905	0.38654	0.167096	FALSE	Mipp1
FBtr0075409	26.5787	23.8135	26.8066	26.6851	28.8546	28.2432	27.9598	28.2966	0.205381	0.741024	-2.36756	FALSE	dsx-c73A
FBtr0075410	31.9444	31.8313	31.9279	31.7991	31.7414	31.741	31.6221	31.6024	0.124075	0.789052	0.198959	FALSE	Aats-tyr
FBtr0075411	25.7992	24.6756	26.1872	26.3811	26.5852	25.8353	26.2544	26.1099	0.500905	0.37047	-0.43541	FALSE	CG4573
FBtr0075412;FBtr0100477;FBtr0331176;FBtr0075413;FBtr0331175;FBtr0100478	32.4026	32.8056	32.2801	32.6016	32.8594	32.7548	32.7055	32.6143	0.500905	0.527662	-0.211027	FALSE	fax
FBtr0075419;FBtr0075418;FBtr0075417;FBtr0308819	29.4889	30.3319	30.228	30.0616	30.2023	30.0367	30.6509	30.6782	0.500905	0.481855	-0.36439	FALSE	CG4729
FBtr0331172;FBtr0075422;FBtr0075421	23.1784	25.6743	26.2715	26.2783	23.7255	25.1014	26.1616	23.7459	0.645306	0.259324	0.667033	FALSE	CG4753
FBtr0333265;FBtr0331173;FBtr0075423	21.8798	21.8798	21.8798	21.8798	21.8798	21.8798	21.8798	21.8798	0.500905	0	0	FALSE	roq
FBtr0075424	34.0797	33.8491	33.6812	34.4684	33.542	34.0174	33.533	33.8223	0.500905	0.465671	0.290954	FALSE	Cpr72Ec
FBtr0114536;FBtr0075426;FBtr0114537;FBtr0075427	32.3897	32.5996	32.3183	32.6703	32.8228	32.8766	33.0394	32.7138	0.171	0.760731	-0.368676	FALSE	Pdh
FBtr0075428	21.8798	21.8798	21.8798	21.8798	21.8798	21.8798	21.8798	21.8798	0.500905	0	0	FALSE	CG4925
FBtr0310461;FBtr0075431	21.8798	23.9885	21.8798	21.8798	21.8798	21.8798	21.8798	21.8798	0.500905	0.353553	0.527173	FALSE	CG13040
FBtr0075433	29.0735	30.0108	29.3943	29.0909	30.2441	30.7178	29.8677	29.515	0.425146	0.600538	-0.693785	FALSE	CG13042
FBtr0075446	23.5215	21.8798	21.8798	21.8798	30.0072	30.1953	30.109	30.5994	0.00012657	0.92727	-7.93752	TRUE	ms(3)72Dt
FBtr0345951;FBtr0301911;FBtr0075449;FBtr0075448;FBtr0333290;FBtr0333291;FBtr0114589;FBtr0075451;FBtr0075450	21.8798	21.8798	21.8798	21.8798	22.5663	21.8798	24.4241	23.715	0.375256	0.62857	-1.26652	FALSE	Taf4
FBtr0333292;FBtr0301912;FBtr0075452	23.6079	24.8325	22.9548	24.5326	21.8798	21.8798	21.8798	21.8798	0.0572511	0.836198	2.10216	FALSE	CG12272
FBtr0075453	30.9674	31.1588	30.6324	31.0355	31.3338	31.0989	31.2062	30.8672	0.500905	0.408241	-0.178024	FALSE	SsRbeta
FBtr0075457	22.2259	25.8754	25.4229	22.734	23.5365	26.1939	26.077	26.1239	0.500905	0.426454	-1.41829	FALSE	CG5027
FBtr0075459	26.2871	21.8798	23.5778	25.5636	21.8798	23.1111	23.4081	21.8798	0.500905	0.519243	1.75739	FALSE	l(3)72Dp
FBtr0075460	22.8064	24.6523	23.0012	21.8798	24.9453	23.7695	22.5295	21.8798	0.894799	0.0836924	-0.196097	FALSE	l(3)72Dr
FBtr0075468	32.0623	31.9841	32.0831	31.1747	32.7165	30.875	31.4544	32.4564	0.952153	0.0391484	-0.0495105	FALSE	CG13065
FBtr0075469	21.8798	21.8798	21.8798	21.8798	21.8798	21.8798	21.8798	21.8798	0.500905	0	0	FALSE	CG4982
FBtr0075470	26.5009	27.6442	27.53	22.9771	27.6591	27.6103	26.1372	26.6705	0.625978	0.271148	-0.856262	FALSE	CG13044
FBtr0075471	30.9553	32.1452	31.425	31.9707	32.2363	32.1008	31.7939	31.238	0.686822	0.230852	-0.218206	FALSE	CG4962
FBtr0333561;FBtr0075475	28.5426	28.8574	29.1803	29.9817	28.9823	28.5731	28.6389	28.8619	0.500905	0.40133	0.376423	FALSE	CG13048
FBtr0075477	28.3354	29.2935	29.7512	30.3086	28.9543	29.7806	28.7384	28.7649	0.622006	0.273545	0.362629	FALSE	CG13049
FBtr0333563;FBtr0075480	21.8798	21.8798	21.8798	21.8798	21.8798	21.8798	21.8798	21.8798	0.500905	0	0	FALSE	CG13053
FBtr0075483	27.8665	28.1973	27.3144	28.2924	27.5301	27.2635	27.3439	27.4704	0.367733	0.633193	0.515672	FALSE	PDCD-5
FBtr0075484;FBtr0333565	23.4688	24.094	24.1639	21.8798	26.9138	24.6613	21.8798	21.8798	0.840456	0.123085	-0.432043	FALSE	l(3)72Dn
FBtr0075491	21.8798	21.8798	21.8798	21.8798	21.8798	23.9231	21.8798	21.8798	0.500905	0.353553	-0.510824	FALSE	Trs20
FBtr0075492	33.4287	33.6182	33.3209	33.6979	33.3642	33.3605	33.3488	33.3884	0.500905	0.542253	0.150945	FALSE	Pgm
FBtr0333294;FBtr0310582;FBtr0310581;FBtr0075494;FBtr0333293;FBtr0075493	27.7391	28.1509	27.7995	28.0673	27.9978	27.5452	27.9102	28.1884	0.919481	0.0653235	0.0288261	FALSE	Zn72D
FBtr0075495	21.8798	21.8798	21.8798	21.8798	21.8798	21.8798	21.8798	21.8798	0.500905	0	0	FALSE	IntS9
FBtr0333599;FBtr0075497	21.8798	21.8798	21.8798	21.8798	21.8798	21.8798	21.8798	21.8798	0.500905	0	0	FALSE	CG5235
FBtr0333600;FBtr0075498	21.8798	21.8798	21.8798	21.8798	21.8798	21.8798	21.8798	21.8798	0.500905	0	0	FALSE	Taspase1
FBtr0333619;FBtr0333618;FBtr0333617;FBtr0075501;FBtr0075500;FBtr0075499	21.8798	21.8798	21.8798	21.8798	21.8798	21.8798	21.8798	21.8798	0.500905	0	0	FALSE	Diap1
FBtr0332133;FBtr0075505	21.8798	21.8798	21.8798	21.8798	21.8798	21.8798	21.8798	21.8798	0.500905	0	0	FALSE	dbo
FBtr0075506	21.8798	21.8798	21.8798	21.8798	21.8798	21.8798	21.8798	21.8798	0.500905	0	0	FALSE	CG12713
FBtr0333572;FBtr0075509	21.8798	21.8798	21.8798	23.853	25.3596	24.7459	24.5529	21.8798	0.466351	0.577882	-1.76144	FALSE	GXIVsPLA2
FBtr0333573;FBtr0075510	21.8798	21.8798	21.8798	21.8798	21.8798	21.8798	21.8798	21.8798	0.500905	0	0	FALSE	elgi
FBtr0333574;FBtr0075511	23.6732	24.0388	24.7111	24.6056	23.9862	24.6787	23.884	24.2073	0.89172	0.0859428	0.0681304	FALSE	CG17032
FBtr0075513	27.3763	27.5092	27.4922	27.7266	27.5469	27.327	27.4068	27.372	0.500905	0.437352	0.112893	FALSE	CG17026
FBtr0333575;FBtr0075514	27.4561	27.8074	28.246	27.99	27.9733	28.0886	28.0411	27.9413	0.594556	0.291777	-0.13619	FALSE	CG17029
FBtr0333576;FBtr0075516	27.3031	28.0227	28.1886	28.5065	27.3564	27.8018	28.2797	28.0159	0.78219	0.166049	0.141777	FALSE	CG17027
FBtr0075517	27.9764	28.3673	28.4643	26.2783	28.722	28.4073	28.2855	28.5354	0.500905	0.460174	-0.715957	FALSE	Arl1
FBtr0075519	28.6947	27.8924	28.3689	28.3966	26.3884	28.1132	27.5073	27.8105	0.396911	0.616652	0.883301	FALSE	mRpS31
FBtr0333578;FBtr0075520	21.8798	21.8798	21.8798	21.8798	21.8798	21.8798	21.8798	21.8798	0.500905	0	0	FALSE	mib1
FBtr0075521;FBtr0333579	28.9113	28.4835	28.7497	28.3247	28.398	28.5189	28.6874	28.6865	0.855238	0.113327	0.0445901	FALSE	CG5830
FBtr0075522	21.8798	21.8798	21.8798	21.8798	21.8798	21.8798	21.8798	21.8798	0.500905	0	0	FALSE	DNApol-delta
FBtr0075524;FBtr0075523;FBtr0075526;FBtr0075525;FBtr0333580;FBtr0330160	25.4686	26.1623	26.3442	26.7074	25.2232	25.3633	27.4229	26.5958	0.983679	0.0126398	0.0193672	FALSE	brm
FBtr0075527	28.276	29.2851	29.3584	28.262	29.4244	28.117	29.164	29.6694	0.672642	0.240666	-0.298306	FALSE	l(3)72Ab
FBtr0332134;FBtr0306855;FBtr0075537;FBtr0306854;FBtr0075536	22.8117	21.8798	23.3476	23.3488	21.8798	21.8798	24.4554	21.8798	0.782012	0.166183	0.323304	FALSE	CG18081;CG15715
FBtr0075538;FBtr0304975;FBtr0100528;FBtr0075539	21.8798	21.8798	21.8798	21.8798	21.8798	21.8798	21.8798	21.8798	0.500905	0	0	FALSE	DCP2
FBtr0075542;FBtr0075543;FBtr0075541	27.1548	27.2654	27.1829	26.8902	27.7589	27.6927	28.0055	27.9981	0.0204388	0.874715	-0.740494	FALSE	fwe
FBtr0075547	21.8798	21.8798	21.8798	21.8798	21.8798	21.8798	21.8798	21.8798	0.500905	0	0	FALSE	CG7275
FBtr0075548	23.2713	21.8798	22.8141	25.3042	24.6921	23.1548	21.8798	26.7903	0.681729	0.234404	-0.811915	FALSE	CG7272
FBtr0075553;FBtr0330177;FBtr0303531;FBtr0330176;FBtr0075554	28.3188	27.6333	27.8404	28.1867	27.5911	28.288	28.112	27.9696	0.988118	0.00822204	0.00464932	FALSE	Eip71CD
FBtr0075559;FBtr0075560;FBtr0331933	29.2242	29.4593	29.5717	29.2321	29.4673	29.2437	29.2774	29.749	0.786034	0.162871	-0.0625173	FALSE	AGO2
FBtr0331934;FBtr0075561;FBtr0306156;FBtr0306154;FBtr0306155	24.8418	24.3985	21.8798	23.3641	23.5823	22.7671	23.6887	23.9774	0.921984	0.0631254	0.117154	FALSE	CG7427
FBtr0332091;FBtr0075562	21.8798	21.8798	21.8798	21.8798	21.8798	21.8798	23.1602	21.8798	0.500905	0.353553	-0.32011	FALSE	dop
FBtr0075563	26.0038	26.7745	26.8357	26.7457	27.8838	26.9949	27.2432	27.9533	0.231564	0.726532	-0.928852	FALSE	CG16979
FBtr0075564	24.6934	21.8798	21.8798	23.7105	21.8798	21.8798	21.8798	21.8798	0.500905	0.524625	1.16111	FALSE	CG12301
FBtr0075565;FBtr0075566	29.5804	29.7885	30.1218	29.8906	29.7247	29.7494	29.8845	30.0033	0.981746	0.0142828	0.00485341	FALSE	CG12304
FBtr0303510;FBtr0075567;FBtr0075568;FBtr0075569;FBtr0290065;FBtr0332092;FBtr0332093	21.8798	21.8798	21.8798	24.1114	21.8798	21.8798	21.6368	21.8798	0.500905	0.383887	0.618634	FALSE	RhoGAP71E
FBtr0075570	21.8798	21.8798	21.8798	21.8798	21.8798	21.8798	21.8798	21.8798	0.500905	0	0	FALSE	CG7372
FBtr0303460;FBtr0075571	21.8798	21.8798	21.8798	21.8798	27.1412	21.8798	21.8798	21.8798	0.500905	0.353553	-1.31536	FALSE	Eig71Eb
FBtr0075572	21.8798	21.8798	21.8798	23.4342	25.7663	21.8798	21.8798	21.8798	0.722451	0.207459	-0.583013	FALSE	Eig71Ed
FBtr0075573	21.8798	21.8798	21.8798	21.8798	24.1237	21.8798	21.8798	21.8798	0.500905	0.353553	-0.560971	FALSE	Eig71Eg
FBtr0332123;FBtr0075574	21.8798	21.8798	21.8798	21.8798	21.8798	21.8798	21.8798	21.8798	0.500905	0	0	FALSE	Eig71Ei
FBtr0075575	21.8798	21.8798	21.8798	21.8798	22.8728	21.8798	21.8798	21.8798	0.500905	0.353553	-0.248261	FALSE	Eig71Ek
FBtr0075582	21.8798	21.8798	21.8798	21.8798	22.9623	21.8798	21.8798	21.8798	0.500905	0.353553	-0.270625	FALSE	Eig71Ej
FBtr0075584	21.8798	21.8798	21.8798	21.8798	21.8798	21.8798	21.8798	21.8798	0.500905	0	0	FALSE	Eig71Ef
FBtr0075585	21.8798	21.8798	21.8798	21.8798	21.8798	21.8798	21.8798	21.8798	0.500905	0	0	FALSE	Eig71Ee
FBtr0075586	21.8798	21.8798	21.8798	21.8798	25.7141	21.8798	21.8798	21.8798	0.500905	0.353553	-0.958576	FALSE	Eig71Ec
FBtr0075587	21.8798	21.8798	21.8798	21.8798	21.8798	21.8798	21.8798	21.8798	0.500905	0	0	FALSE	Eig71Ea
FBtr0075591	21.8798	21.8798	23.6935	21.8798	21.8798	21.8798	21.8798	21.8798	0.500905	0.353553	0.453433	FALSE	CG7650
FBtr0332095;FBtr0075592	23.2285	21.8798	22.6426	21.8798	21.8798	23.4354	23.8837	21.8798	0.70623	0.218202	-0.361998	FALSE	CG7656
FBtr0075595	21.8798	21.8798	21.8798	21.8798	21.8798	21.8798	21.8798	21.8798	0.500905	0	0	FALSE	mrn
FBtr0075596	27.8997	28.2208	27.6917	27.3498	27.5535	27.5263	27.7621	27.3314	0.500905	0.416528	0.247211	FALSE	CG7739
FBtr0075600;FBtr0075599	27.615	23.5384	27.8156	23.6158	27.8739	29.1147	28.2376	27.6681	0.415206	0.605975	-2.57738	FALSE	CG7945
FBtr0075605	28.3813	28.1318	28.0579	28.1117	28.0696	27.9051	27.92	28.1934	0.500905	0.488617	0.148662	FALSE	CG7857
FBtr0075607	21.8798	21.8798	21.8798	21.8798	24.9539	21.8798	23.0752	23.5985	0.341446	0.647644	-1.49707	FALSE	Tollo
FBtr0306308;FBtr0306307;FBtr0075614	21.8798	21.8798	21.8798	21.8798	21.8798	21.8798	21.8798	21.8798	0.500905	0	0	FALSE	Toll-6
FBtr0332815;FBtr0075617	21.8798	21.8798	21.8798	21.8798	26.9056	26.918	26.7033	27.116	3.94159e-07	0.934628	-5.03097	TRUE	CG7804
FBtr0075624	21.8798	21.8798	21.8798	21.8798	21.8798	21.8798	21.8798	21.8798	0.500905	0	0	FALSE	CG5114
FBtr0114529;FBtr0075627;FBtr0075626	23.4709	22.1084	22.6274	24.547	22.8603	23.4351	24.4444	22.5383	0.906634	0.0736735	-0.131096	FALSE	mnd
FBtr0075629	31.7891	32.0142	32.043	32.2522	31.9201	32.1207	31.9979	31.7622	0.692024	0.227935	0.074395	FALSE	Prosbeta2
FBtr0075632	23.1605	21.8798	24.0498	23.6885	21.8798	25.6579	22.6895	21.8798	0.921984	0.0630007	0.167901	FALSE	Aats-gly
FBtr0075637	25.872	25.8556	26.1533	25.8203	26.0232	23.0856	25.9018	26.0704	0.54987	0.320568	0.655071	FALSE	CG13458
FBtr0331830;FBtr0075640	27.5722	27.9018	27.6134	27.7816	24.717	27.5723	27.9685	27.8748	0.558125	0.315178	0.684091	FALSE	Pex3
FBtr0075642	25.0174	23.4592	23.7071	23.4474	26.1389	24.9522	26.0707	25.1478	0.168856	0.762348	-1.66965	FALSE	Prp31
FBtr0075643	26.1255	27.1134	26.8684	27.3586	27.5549	27.1068	27.3441	27.2819	0.500905	0.514804	-0.455432	FALSE	CG6878
FBtr0075644	21.8798	21.8798	21.8798	21.8798	28.9916	28.9575	28.5722	28.1978	3.60585e-06	0.933306	-6.80002	TRUE	CG6888
FBtr0075645	21.8798	26.2129	24.8732	21.8798	21.8798	22.9393	25.4564	23.736	0.925719	0.0598712	0.208515	FALSE	CG7011
FBtr0075646	21.8798	21.8798	21.8798	21.8798	21.8798	21.8798	21.8798	21.8798	0.500905	0	0	FALSE	Msh6
FBtr0075647	26.0061	26.9873	26.2095	26.7526	23.7396	23.8064	26.4259	26.6543	0.500905	0.511692	1.33232	FALSE	CG32147
FBtr0346644;FBtr0075648	34.7934	34.727	34.6529	34.4015	34.8263	34.5735	34.3916	34.5667	0.784481	0.164422	0.0541756	FALSE	Pdi
FBtr0075665	21.8798	21.8798	21.8798	21.8798	21.8798	21.8798	21.8798	21.8798	0.500905	0	0	FALSE	CG12310
FBtr0075669	21.8798	21.8798	21.8798	21.8798	25.9986	26.0012	24.5663	26.3611	0.00351975	0.90686	-3.85204	TRUE	Rpn12R
FBtr0075672	30.4935	29.9833	30.044	29.9237	29.431	29.6972	29.6715	29.7875	0.222019	0.73261	0.46431	FALSE	mRpL39
FBtr0075677	21.8798	21.8798	23.4651	25.3231	22.6018	24.8695	24.5698	25.0287	0.500905	0.39393	-1.13047	FALSE	CG9628
FBtr0333032;FBtr0075679	21.8798	21.8798	21.8798	21.8798	23.2097	21.8798	21.8798	25.7854	0.500905	0.469584	-1.30888	FALSE	dlp
FBtr0075685	21.8798	21.8798	21.8798	21.8798	21.8798	24.9241	23.9785	21.8798	0.500905	0.528286	-1.28576	FALSE	CG13477
FBtr0075689	21.8798	21.8798	21.8798	21.8798	21.8798	23.2239	23.3542	23.0928	0.23812	0.720941	-1.00788	FALSE	CG13473
FBtr0075691	26.7335	26.4704	26.6814	26.2941	26.7783	26.7801	26.6232	26.263	0.793286	0.1577	-0.0662944	FALSE	Tdrd3
FBtr0333075;FBtr0333074;FBtr0075693	24.149	25.2113	23.1611	24.7242	21.8798	24.4505	25.5968	24.916	0.949407	0.0415556	0.100617	FALSE	CG9425
FBtr0075695;FBtr0110825	26.2748	26.5097	26.2659	25.7738	26.2708	26.5248	23.8871	26.4586	0.677113	0.237732	0.420702	FALSE	CG17839
FBtr0075697	22.8582	23.0004	21.8798	23.773	21.8798	21.8798	21.8798	21.8798	0.294961	0.676854	0.998055	FALSE	gnu
FBtr0333076;FBtr0075698	29.1327	29.0454	29.1116	29.3396	28.9514	28.4641	28.471	28.4952	0.0965921	0.806553	0.561917	FALSE	NHP2
FBtr0075699;FBtr0300190	21.8798	23.5674	21.8798	21.8798	21.8798	21.8798	21.8798	21.8798	0.500905	0.353553	0.4219	FALSE	bmm
FBtr0075700	21.8798	23.7335	24.0167	24.3959	21.8798	25.3157	25.2747	26.2927	0.500905	0.371803	-1.18421	FALSE	mop
FBtr0100444;FBtr0075708;FBtr0075707;FBtr0075706;FBtr0075704;FBtr0100445;FBtr0075705;FBtr0075703;FBtr0333045;FBtr0333046	27.5632	27.2704	26.6284	28.5329	27.0792	21.8798	24.1747	21.8798	0.243864	0.713673	3.74539	FALSE	Trl
FBtr0075712	25.5386	26.5838	27.193	25.489	26.6661	26.615	25.8433	27.0654	0.643752	0.260274	-0.34635	FALSE	CG4914
FBtr0075715	21.8798	21.8798	21.8798	21.8798	21.8798	21.8798	21.8798	21.8798	0.500905	0	0	FALSE	RecQ5
FBtr0308595;FBtr0075719;FBtr0075718	32.0421	32.0622	32.4882	32.4579	32.3865	32.546	32.5865	32.8295	0.402895	0.613838	-0.324527	FALSE	Mpcp
FBtr0075722	24.0102	25.363	24.9825	24.3298	25.3582	22.7088	25.5346	25.2228	0.977544	0.0180147	-0.0347171	FALSE	Lk
FBtr0075723;FBtr0333037;FBtr0075724	21.8798	21.8798	21.8798	21.8798	21.8798	21.8798	21.8798	21.8798	0.500905	0	0	FALSE	Gbs-70E
FBtr0333042;FBtr0075728;FBtr0333041	21.8798	21.8798	21.8798	21.8798	21.8798	21.8798	21.8798	21.8798	0.500905	0	0	FALSE	stwl
FBtr0075737;FBtr0075736	21.8798	21.8798	21.8798	21.8798	30.5259	30.8747	30.3698	30.4247	1.78353e-07	0.934935	-8.66902	TRUE	CG7768
FBtr0075740	21.8798	21.8798	21.8798	21.8798	21.8798	21.8798	21.8798	21.8798	0.500905	0	0	FALSE	CG7924
FBtr0075741;FBtr0321257	21.8798	21.8798	21.8798	21.8798	24.9872	24.455	24.003	21.8798	0.246744	0.711101	-1.95148	FALSE	CG7906
FBtr0333036;FBtr0333035;FBtr0333034;FBtr0075746;FBtr0075748;FBtr0330178;FBtr0330115;FBtr0075747;FBtr0079733;FBtr0330116;FBtr0330210	21.8798	21.8798	21.8798	21.8798	21.8798	21.8798	21.8798	21.8798	0.500905	0	0	FALSE	D;Sox21a;Sox21b;SoxN
FBtr0075753;FBtr0333020	30.5928	30.9526	30.9116	30.6419	30.8179	30.2835	30.4679	30.8214	0.500905	0.381004	0.177047	FALSE	Hml
FBtr0075756	29.1155	29.4032	28.7221	29.2248	29.1927	29.0786	30.5016	29.2646	0.500905	0.378268	-0.39297	FALSE	Gl
FBtr0346645;FBtr0075759	21.8798	21.8798	21.8798	21.8798	21.8798	21.8798	21.8798	21.8798	0.500905	0	0	FALSE	ssp2
FBtr0075762;FBtr0075763;FBtr0075761	30.9919	31.8189	31.4255	31.0443	31.7618	30.9713	30.5741	30.5232	0.500905	0.368998	0.36254	FALSE	Hsc70-1
FBtr0075766	34.0979	33.7873	33.8056	33.9506	33.8242	33.9807	33.904	33.8327	0.850185	0.116581	0.0249391	FALSE	26-29-p
FBtr0333050;FBtr0075768	21.8798	21.8798	21.8798	21.8798	21.8798	21.8798	21.8798	21.8798	0.500905	0	0	FALSE	upSET
FBtr0343100;FBtr0304672;FBtr0075769	21.8798	21.8798	21.8798	21.8798	23.8061	24.2686	23.2125	22.7546	0.0558917	0.837127	-1.63068	FALSE	CG6650
FBtr0075770	21.8798	21.8798	21.8798	21.8798	24.9152	23.8345	24.3702	21.8798	0.25163	0.707075	-1.87016	FALSE	CG6661
FBtr0302433;FBtr0075774	21.8798	21.8798	21.8798	21.8798	21.8798	21.8798	21.8798	21.8798	0.500905	0	0	FALSE	CG6833
FBtr0075775;FBtr0334053;FBtr0075776;FBtr0114573	21.8798	25.1067	23.5541	21.8798	23.0744	23.5126	21.8798	23.573	0.949087	0.0417704	0.0951476	FALSE	CG32138
[truncated: 5,953 more rows]
