# Supplementary material for: The developmental proteome of Drosophila melanogaster
Source: HighWire-hosted journal article supplement (doi:10.1101/gr.213694.116), 2017-04-05
Supplement: Supplemental_Tables.zip [file Supplemental_Table_S8.xlsx]

## Sheet: RPKM
gene	embryos_0_2h	embryos_4_6h	embryos_10_12h	embryos_18_20h	larvae_L1	larvae_L2	L3.larvae..12.hr.post.molt	L3.larvae..light.blue.gut.PS.3.6.	WPP...0h..fixed.	WPP...24.hr	pupae..WPP...2.days	pupae..WPP...3.days	pupae..WPP...4.days	adult.male..eclosion...5.days	adult.female..eclosion...5.days	logFC_f_e02	logFC_f_m	maternally_loaded
CG17829	5.95643	5.98382	4.66269	3.73849	2.98628	2.74411	2.589	2.84803	3.18944	3.54498	3.00325	2.34909	2.36804	2.5531	4.90416	-1.05227	2.35107	maternally loaded
Roc1a	7.00035	7.67462	7.10675	5.79678	5.94908	6.33068	6.17845	6.78634	7.19226	7.00544	6.50772	5.72932	5.77855	5.59037	6.6404	-0.359943	1.05003
CDC45L	6.76357	5.12587	3.48998	2.2634	3.98476	3.73982	3.27686	3.26588	2.98284	3.37191	2.54931	2.89362	3.41087	2.52238	5.77179	-0.99178	3.24941	maternally loaded
fs(1)N	5.71644	0.645122	0.301229	0.28589	0.0794576	0.0826319	0.0680576	0.401532	0.417143	1.0624	1.063	1.06294	1.46662	1.7194	5.79337	0.0769286	4.07396	maternally loaded
png	6.84548	2.2707	0.813353	0.569158	0.26756	0.24185	0.204278	0.186862	0.489963	0.672916	0.348627	0.45775	1.14788	0.665455	5.77495	-1.07053	5.10949	maternally loaded
CG4194	0	4.52765	6.46546	0	0	0	0	0	0	0	0	0	0	0	0	0	0
CG4061	3.2347	4.03838	3.02383	3.08709	2.8714	2.37853	2.40081	3.49165	3.64777	4.22564	3.53495	2.96924	2.71037	3.29149	3.66338	0.428675	0.371889
CG2924	7.41811	6.15839	5.57169	5.17886	4.27577	3.7577	3.5857	5.15603	6.13874	5.77889	5.13275	4.33569	4.30236	3.92393	6.61202	-0.806091	2.68809	maternally loaded
Tsp3A	4.54809	4.65826	5.3171	3.60019	3.24403	3.14964	2.88437	3.7416	4.47715	4.54531	4.03155	2.95001	2.76526	2.28675	3.44389	-1.1042	1.15715
Klp3A	5.6956	5.83491	3.37847	1.01601	1.20861	1.53285	1.78571	3.72116	3.74253	4.84542	4.24557	4.00235	3.93923	5.0622	4.84808	-0.847514	-0.214122
CG2941	2.96161	2.20463	1.41832	0.50132	0.661849	0.649207	0.705518	1.24944	1.5708	1.46382	1.21682	0.855788	0.71604	0.970137	2.87435	-0.0872543	1.90422
dgt4	5.23751	3.68134	2.84209	1.28373	1.0127	1.54542	1.59613	2.79867	2.72074	3.15485	2.31096	1.617	1.73102	2.82892	4.15851	-1.07899	1.3296
mei-9	4.07497	3.08599	1.78161	0.893027	1.92133	2.01075	1.78923	2.14321	2.30158	2.80571	2.27751	1.23546	1.13947	1.402	3.83983	-0.235139	2.43783	maternally loaded
Xpac	4.96216	2.97284	3.68527	2.4211	3.0041	3.0163	2.58145	3.71434	3.94169	4.56255	4.01685	3.59108	3.41284	4.10699	4.37856	-0.5836	0.271567
dhd	12.0814	6.37566	4.17583	3.60888	0.636442	0.816496	0.371409	0.588996	1.40918	1.29616	2.30547	1.86318	4.50203	2.18949	11.5461	-0.53528	9.35662	maternally loaded
Cdk7	6.09748	4.43181	3.43876	2.09975	3.48396	3.74693	3.37907	3.52341	3.52454	3.76689	3.48668	2.8781	2.96484	3.18836	5.35131	-0.746168	2.16296	maternally loaded
CG3309	5.4811	4.33963	3.9445	3.07533	2.14571	2.30866	1.96473	2.64275	2.94158	3.12948	2.92783	2.24791	2.59995	2.6641	4.45094	-1.03016	1.78684
fs(1)M3	4.86245	0.476543	0.233916	0.181277	0.150809	0.124325	0.0312004	0.0617827	0.193359	0.1553	0.188425	0.266036	1.12108	0.150113	5.97415	1.1117	5.82404	maternally loaded
CG3815	5.715	4.11283	4.37975	2.84947	3.17235	2.65629	2.56728	3.15358	3.14831	4.12468	3.4901	2.73489	2.81127	3.47677	4.71321	-1.00179	1.23644
swa	7.94072	4.34326	4.53481	3.44	0.200204	0.183258	0.0681612	0.0620974	0.19313	0.294341	0.44766	0.322646	1.5441	0.457127	7.19689	-0.743832	6.73977	maternally loaded
APC7	6.49633	1.4088	0.338892	0.249486	0.0806013	0.243515	1.18058	0.889416	0.375211	0.303669	0.379981	0.531231	1.0861	0.979783	6.2139	-0.282432	5.23412	maternally loaded
l(1)G0193	5.69989	5.67113	6.21449	5.0929	4.2087	4.4404	4.38078	5.2509	6.68023	5.95806	5.18026	4.88917	5.82679	4.77216	5.79306	0.0931763	1.02091
dec-1	0.0068366	0.0238768	0.0875538	0.709096	0.615018	0.30905	0.21001	0.189165	0.324199	1.15426	0.72058	0.70057	0.747252	0.606792	9.13026	9.12342	8.52346	maternally loaded
Es2	5.41511	3.82745	4.17981	2.99999	2.77226	2.48119	2.07788	3.12615	3.30697	3.93392	3.76853	3.37258	3.18512	4.10164	4.58151	-0.833602	0.479866
Cp7Fb	0	0.0110019	0.0231639	0.0975411	0.0594936	0.0475627	0	0	0	0	0	0	0	0	6.80162	6.80162	6.80162	maternally loaded
Cp36	0	0.0347759	0	0.0890854	0	0	0.0802962	0	0	0.57948	0.443594	0	1.45691	0	11.66	11.66	11.66	maternally loaded
CG12081	5.77637	4.52572	5.5313	4.70041	3.63839	3.13634	3.92019	4.8259	4.76203	5.2294	4.28939	3.60985	6.18727	4.05991	4.5626	-1.21377	0.502694
Caf1-180	6.73258	6.44721	3.96257	2.68135	3.15273	3.08009	2.63941	2.94629	2.72637	3.41922	1.78393	1.08471	1.64334	1.08383	5.69579	-1.03679	4.61196	maternally loaded
CG2990	4.44147	2.66943	0.922639	0.510075	0.878347	1.10902	0.917572	0.883316	0.891904	0.811643	0.307563	0.298301	0.324387	0.383764	3.72186	-0.71961	3.3381	maternally loaded
Yp1	0.0840204	0.1968	0.488168	0.660855	0.185244	0.0515244	0.0442814	0.375771	0.386942	1.05435	2.27371	0.626183	3.27078	6.4389	13.7466	13.6626	7.30773	maternally loaded
Yp2	0.211165	0.280854	0.105322	0.222273	0.163552	0.102342	0.0666278	0.586228	0.457525	0.678954	1.78904	0.433342	2.99519	5.4514	13.1328	12.9216	7.68135	maternally loaded
Psf3	5.49704	5.22468	4.28141	3.71544	3.88689	4.03927	3.66142	3.4867	3.37315	3.85849	3.63996	3.65343	3.68523	4.25786	5.00689	-0.490153	0.749035
Ipk1	3.50305	3.61245	1.7633	0.90625	1.32766	1.79671	1.57723	2.1272	1.88465	2.41413	1.76386	1.28397	1.21315	1.8723	2.87449	-0.628565	1.00219
CG9754	4.67891	4.67968	3.49835	2.56846	1.66525	1.8523	1.81043	2.91803	3.24133	3.44465	3.20493	2.69562	1.92432	2.56116	3.8875	-0.791415	1.32633
CG6613	4.35859	1.24341	3.62932	3.20233	2.67574	2.65555	2.7611	3.74584	4.23278	3.83317	3.46874	3.09341	3.25468	3.05595	4.01064	-0.347957	0.954684
CG6758	5.42547	4.80657	4.19303	3.10702	2.99092	2.66201	2.61382	3.44049	3.79693	4.31712	3.91373	3.47333	3.91637	4.47247	4.47388	-0.951582	0.00141602
Mes4	4.86108	4.10626	2.62577	1.48101	2.40872	2.9866	2.56412	2.92469	2.70139	2.73521	2.17684	1.88324	1.48012	2.34184	4.40416	-0.456916	2.06232	maternally loaded
CycB	10.4928	9.49609	7.9968	5.91633	1.56919	2.14932	2.68091	5.07085	5.19705	6.04511	4.95581	4.10559	4.71538	5.26901	9.73773	-0.755069	4.46873	maternally loaded
robo	0.873086	4.69495	4.91482	3.69346	3.19353	2.20786	1.63235	3.09729	4.14436	4.72794	4.24637	3.35631	2.39104	2.83629	0.982394	0.109308	-1.8539
twi	3.41486	6.30264	3.99373	2.52738	1.98813	1.09465	1.18615	2.35304	2.95865	3.59667	3.15814	2.94705	3.36616	3.86929	0.309795	-3.10506	-3.5595
CG30413	1.90904	1.3044	5.25749	9.08347	5.06394	4.99309	3.7794	0.507896	0.201109	0.0672575	2.02949	0.0475556	0.115535	0.0601588	0	-1.90904	-0.0601588
apt	6.75027	7.19507	6.34644	5.30979	4.65916	3.64854	3.44406	3.85215	3.40034	3.75716	3.91444	3.8489	3.40419	4.01065	5.84516	-0.905108	1.83451
retn	7.47513	6.76588	5.60172	4.47445	2.86431	2.30018	1.50609	2.06759	2.4191	3.77025	3.20651	2.93305	3.26223	4.05189	6.38464	-1.09049	2.33275	maternally loaded
mr	4.83611	3.91073	3.4765	1.99726	2.18231	2.51925	2.37075	3.37906	3.52647	4.04762	3.5737	3.18365	2.47043	3.76193	4.26438	-0.571727	0.502445
shu	5.43529	1.30693	0.8755	0.765936	1.27781	1.30559	1.53382	1.82862	2.11415	1.78108	1.17523	1.24337	2.51864	1.35146	5.04922	-0.386067	3.69776	maternally loaded
Orc4	5.49695	4.93303	4.00697	1.44017	2.46726	2.58512	2.21522	2.79898	3.30969	3.42385	2.59758	2.20827	2.00687	2.68992	4.54552	-0.951434	1.8556
CG12090	3.71872	3.95141	3.81213	3.89619	3.34508	2.91353	2.85737	3.69413	3.95634	4.1899	3.77917	3.40241	3.34924	4.57946	3.8666	0.147885	-0.712861
CG9184	3.0944	3.20664	11.01	5.69709	0	2.66187	0	0	0	1.50155	3.63072	1.9907	2.37162	1.22777	0	-3.0944	-1.22777
Klp61F	5.69638	6.19075	4.33867	2.76076	0.90381	1.31414	2.03255	3.42686	3.45157	4.08935	2.06343	1.43587	1.55954	2.12556	4.55655	-1.13982	2.43099	maternally loaded
CG12011	2.13973	6.96261	10.3704	4.00567	0.395051	1.14684	0.117509	0.238799	0.223424	1.21616	2.07653	0.56454	0.706044	0.522	0.51531	-1.62442	-0.00669072
CG12018	5.65196	4.32356	3.32437	1.98608	2.782	2.91353	2.46466	3.10351	2.9474	3.65103	2.73097	2.25536	2.31394	3.11861	4.70512	-0.94684	1.5865
CG17249	3.87398	4.5903	3.56645	2.97156	2.5621	2.71853	2.23207	3.03825	3.43269	3.28342	2.99154	2.29683	2.21798	2.56508	3.21397	-0.660011	0.648889
CG8960	4.99812	7.30861	4.31721	2.74726	1.46515	0.206631	0.0524068	0.852848	0.801244	1.53592	1.82742	1.17794	1.11782	1.97964	0.575364	-4.42276	-1.40428
CG11486	7.09531	6.59098	6.34319	6.40515	5.29507	5.14764	4.88527	6.30468	5.61209	5.99807	5.54924	4.94071	5.58438	5.76588	6.37117	-0.724148	0.605289
CG11537	5.36175	4.8228	4.69519	5.36875	5.40447	4.88501	4.73062	5.00437	4.7549	4.56889	4.52374	4.74923	5.37189	5.69172	5.00263	-0.359118	-0.689086
CG32264	5.22859	5.32654	4.99222	5.40362	4.73259	3.95249	3.96663	4.88469	5.18006	5.45162	5.45522	4.62715	5.19956	5.46187	4.66416	-0.56443	-0.797717
dib	1.22687	5.32008	1.44238	0.75852	0.163639	0.473538	0.431841	0.93828	0.665454	0.91944	0.942731	0.191646	0.446541	0.0812689	0.881532	-0.345335	0.800263
pav	6.4758	6.92274	4.64283	2.14981	1.39349	1.71581	2.21355	3.74095	3.60432	4.20216	2.26936	1.47555	2.24642	1.9377	5.36027	-1.11553	3.42257	maternally loaded
ago	7.40168	7.98257	6.79013	5.24168	4.42854	3.75619	3.64893	4.77698	5.42788	5.85596	5.103	4.30514	4.29069	4.78049	6.35047	-1.05121	1.56998
CG11357	6.05017	5.90792	5.19015	4.40676	4.41688	3.77752	3.29238	4.50324	4.74939	4.93922	4.37197	3.63205	4.02819	4.06538	5.09008	-0.960095	1.02469
feo	7.62772	6.88407	5.36448	2.26265	2.81256	2.2057	2.62891	4.5686	4.3346	5.19649	3.85612	3.23606	3.57225	4.44246	6.37037	-1.25736	1.92791
CG15735	6.75184	6.71484	6.11578	4.93282	5.24125	5.48424	5.00516	5.52303	5.76345	5.99522	6.03805	4.99905	4.90897	4.52212	6.41071	-0.341126	1.88859
Chrac-16	6.95468	8.08006	7.08937	4.29266	2.90454	3.20018	3.43508	4.69025	5.01234	5.65462	4.4193	3.27659	2.98859	2.77467	5.28423	-1.67046	2.50956	maternally loaded
CG11164	6.52205	5.78409	4.60986	3.57905	2.41853	2.45599	2.02727	2.44986	2.50201	2.57434	1.48805	1.05021	1.5275	1.29406	5.03241	-1.48964	3.73835	maternally loaded
mus101	5.47533	3.66347	1.93897	0.898119	1.89531	1.60747	1.47525	2.31731	2.15186	2.84842	1.98548	1.44364	1.49285	2.23966	4.06946	-1.40587	1.8298
Yp3	0.233864	0.559207	0.935637	0.627909	0.467716	0.297065	2.38694	2.98545	1.47873	1.74464	2.17624	1.28474	5.50472	6.393	13.0625	12.8286	6.66948	maternally loaded
Ndc80	5.22867	5.47864	3.19899	1.14232	1.06285	1.24359	1.61632	2.38928	2.36897	2.86882	1.58848	1.09588	1.43573	1.90675	4.14797	-1.08071	2.24122	maternally loaded
yl	9.16906	3.47925	2.09487	2.09084	0.152386	0.141947	0.0816224	0.217198	0.307455	0.203544	0.376637	0.695845	3.66594	0.466876	8.828	-0.341066	8.36112	maternally loaded
CG11674	8.37339	4.84766	3.42695	1.91379	0.202764	0.156891	0.11927	0.0785538	0.284995	0.331393	0.769607	0.736226	3.17513	0.201939	7.90752	-0.46587	7.70558	maternally loaded
CG12398	0	0	0	0	0	0	0	0	0	0	0	0	0	0	4.58269	4.58269	4.58269	maternally loaded
dah	7.06391	5.23686	4.87634	3.43447	0.316007	0.550919	0.91831	1.96968	1.62889	3.01357	1.28387	0.617792	0.990943	0.457683	5.09733	-1.96658	4.63965	maternally loaded
CG9203	4.32847	2.9791	1.2554	0.493607	0.554025	0.703126	0.66985	1.67742	1.78401	2.17141	1.55537	1.16274	1.00814	1.83099	3.57581	-0.752662	1.74482
Grip128	6.04339	2.7006	2.82917	1.75332	2.49057	2.37537	2.21048	2.84491	2.69139	3.34969	2.914	2.67388	2.47041	3.13331	5.07759	-0.965801	1.94428
CG16952	5.3128	4.651	5.38747	5.07923	4.33437	3.65236	3.30583	4.22213	4.78106	5.11211	4.77938	4.48057	3.99096	3.79815	4.82468	-0.488128	1.02652
CG8924	6.2756	5.08108	4.5893	3.46348	2.35702	1.53995	1.30535	2.84422	3.33125	4.17012	3.07485	2.23595	1.94962	1.97698	5.23367	-1.04193	3.25669	maternally loaded
CG8944	5.72004	4.60193	4.33239	3.23563	2.47496	2.06606	1.97469	2.76956	3.23055	3.50769	2.92572	2.05876	2.16491	2.0598	4.88287	-0.837164	2.82307	maternally loaded
CG3679	6.52192	4.96429	3.92894	2.83707	0.684302	0.663688	0.892419	2.59979	2.74213	3.10018	1.97477	1.33751	1.45608	2.09568	5.61979	-0.902124	3.52411	maternally loaded
CG4880	6.06259	4.65162	4.29306	2.96038	1.99346	2.52306	2.52468	3.38522	3.56655	4.16108	3.65517	3.24874	3.09057	4.24028	5.06861	-0.993973	0.828331
Axs	4.29193	3.39105	2.60272	2.22648	2.87943	3.13865	3.75437	4.08298	3.92752	3.28985	2.73544	2.36421	4.20666	3.3159	3.61179	-0.680147	0.295891
CG4991	7.56472	1.46295	0.51882	2.52376	3.43067	3.61019	2.96945	0.885726	1.25245	0.455762	0.589194	1.85594	3.2377	3.08634	7.29371	-0.271007	4.20737	maternally loaded
CG5010	6.87784	2.56865	6.12658	6.4922	7.18436	7.23967	7.17818	5.99271	6.52267	5.99526	6.11169	6.34682	6.78108	7.46032	6.91321	0.0353702	-0.547112
baz	4.96054	5.08684	4.40069	3.67187	2.18987	2.08458	2.09601	2.46889	3.00856	3.43743	3.45998	2.69075	2.88607	2.82609	3.87644	-1.0841	1.05035
CG8173	6.94459	5.96836	5.33261	3.10166	1.49054	1.50378	1.91133	3.53552	3.84434	4.27803	3.33087	2.55149	2.33126	2.77291	5.80266	-1.14193	3.02974	maternally loaded
CG8188	5.97306	4.96145	5.67582	4.72449	3.63725	3.50455	3.15061	4.57347	5.26218	5.49738	5.12527	4.5974	4.35249	4.60076	5.40252	-0.570535	0.801767
dik	5.60135	5.58347	5.06698	3.83731	3.12919	2.85723	2.71354	3.73781	3.86379	4.11821	3.42674	2.49856	2.63898	3.00002	4.62623	-0.97512	1.62621
CG15047	6.1507	1.66242	0.985593	0.721005	0.703314	0.453848	0.188802	0.421111	0.658317	0.522109	0.665635	0.436499	0.66541	0.80587	5.24258	-0.90812	4.43671	maternally loaded
fu	5.52065	4.91518	4.16048	3.38575	2.70553	2.19577	1.89728	2.86538	3.11025	3.62504	2.66751	2.12173	2.48699	2.27258	4.12649	-1.39416	1.85391
Grip84	6.71374	5.03137	3.72481	2.22918	3.1426	3.01201	2.76501	3.46502	3.82139	4.37906	4.01013	3.53285	4.14713	3.95376	6.35161	-0.362128	2.39786	maternally loaded
vfl	7.10093	7.46097	4.79337	5.28601	4.19124	2.73393	2.68727	4.06029	3.56903	3.49154	2.0686	0.91234	1.51514	1.36812	5.79422	-1.30671	4.4261	maternally loaded
CG12702	5.4106	6.11807	4.35781	2.37559	0.768436	1.1485	1.55719	2.91178	2.87082	3.69232	2.49796	1.95064	2.29312	2.97573	3.83359	-1.57701	0.857859
Su(var)3-3	0.0779886	0.420549	0.194794	2.7245	5.30872	4.63809	4.42453	4.84359	1.22014	0.1426	0.211513	0.211724	0.414427	0.652264	0.216963	0.138974	-0.435302
polo	8.25953	8.42034	6.33688	4.56246	1.73976	2.42796	3.21311	5.41045	5.56861	6.40307	5.08352	4.48523	4.30992	5.50351	7.43933	-0.820205	1.93582
CG9376	5.05289	2.8407	4.28919	3.41268	3.17346	3.49677	3.21485	3.73625	3.98054	4.28393	4.21642	3.69342	2.68594	3.64947	4.54364	-0.509245	0.894178
CG6885	2.96932	2.73249	0.571447	0.109379	0	0.0135486	0	0	0.0163595	0.0616528	0.0776507	0.0435679	0.0362239	0.0369894	0.118026	-2.85129	0.081037
bora	5.98255	6.25892	4.39173	3.03589	0.289045	0.430306	0.992026	2.35872	2.54782	3.6979	3.11315	2.57859	2.41188	3.70865	4.41284	-1.56971	0.704192
CG7341	3.7691	3.99829	2.92984	1.66893	1.16918	1.29811	1.59763	1.88139	2.29453	2.18068	1.31462	1.09255	0.822701	3.28131	3.31349	-0.455606	0.0321786
sina	6.1095	5.41967	5.05412	3.99856	3.29702	3.06353	2.75173	4.21732	4.5975	5.19584	5.03112	4.68422	4.71747	5.16482	5.20205	-0.907455	0.037229
spd-2	6.85125	5.58296	3.15913	1.24305	1.05263	1.06063	1.39852	2.62742	2.43874	3.3702	2.3554	1.84732	2.09382	2.83233	5.78713	-1.06412	2.9548	maternally loaded
CG4925	4.39558	3.49092	2.94444	2.56748	2.36417	2.90146	2.51701	2.8186	3.17448	3.3555	3.56491	2.91594	2.25649	3.15206	4.09441	-0.30117	0.942357
CG5235	5.25393	5.82338	4.68952	1.8432	0.710528	0.991316	1.08546	2.8152	3.04288	2.9872	1.18704	0.749674	0.826763	0.881708	4.33053	-0.923399	3.44882	maternally loaded
DNApol-delta	5.38407	3.19444	1.97312	0.986538	2.24769	2.34793	1.96749	2.47258	2.66225	2.76593	1.84926	1.40423	1.4756	1.89546	4.86261	-0.521469	2.96715	maternally loaded
CG7372	5.79445	6.90282	5.56094	3.30105	1.85913	1.73573	2.00182	3.51215	3.8975	4.66393	3.04945	2.10488	2.07545	2.73705	4.89104	-0.90342	2.15398	maternally loaded
Msh6	6.08214	5.3302	2.37805	0.880416	1.78444	1.8902	1.97241	2.77438	2.72908	3.44783	2.67666	2.13268	1.86002	2.91421	5.34386	-0.738281	2.42965	maternally loaded
stwl	5.22543	4.50737	3.35397	2.20553	1.74754	1.60872	1.58403	2.51487	2.88837	3.23572	2.84724	2.18252	1.9965	2.73725	4.09768	-1.12775	1.36043
CG8783	5.60064	3.04985	3.13553	2.85542	2.65923	2.40321	2.17796	2.78191	2.93359	3.43322	3.16752	2.86846	2.80114	3.26221	4.59058	-1.01006	1.32837
CG14110	1.40891	2.03036	8.54476	3.58606	0.211119	1.68077	0.265028	0.166356	0.450438	1.87851	4.89658	0.786387	0.522756	0.157183	0.179187	-1.22973	0.022004
CG10222	5.22958	3.6414	3.72838	2.08844	2.47453	2.68498	2.4929	3.16346	3.46657	3.50545	3.08152	2.35168	2.3242	2.41453	4.1802	-1.04938	1.76567
CG11263	3.68605	2.29971	1.875	1.18523	0.346058	0.11946	0.272788	0.372223	0.605682	0.707073	0.695797	0.482742	0.351915	0.254668	3.28039	-0.40566	3.02572	maternally loaded
trn	2.32397	7.59308	7.17469	4.86302	3.38812	2.76764	2.01643	3.8919	4.56571	5.63838	5.11295	3.49718	2.80076	2.24897	1.54292	-0.781045	-0.706044
CG10681	3.5726	3.18826	3.52793	3.0336	1.88984	1.83154	2.45111	2.9867	3.37394	3.50094	3.27752	2.81267	2.57156	2.99265	2.79109	-0.781506	-0.201554
sti	5.75056	7.11628	5.2908	3.12404	0.943962	1.37597	2.00542	3.73829	3.63001	4.18007	2.11917	1.42172	1.67943	1.9631	4.31661	-1.43395	2.35351	maternally loaded
CG11560	4.72552	4.53349	3.95621	2.65053	2.48883	2.26041	2.33329	3.04261	3.1221	3.59862	3.02378	2.2428	1.9373	2.56588	3.34027	-1.38525	0.774383
Grip163	3.56395	3.24149	2.28039	1.84737	1.42515	1.32582	1.17535	1.84595	2.40452	2.71828	2.54271	2.21083	1.54552	1.90334	3.2788	-0.285156	1.37546
CycA	9.52845	9.1247	7.47225	4.74376	3.09854	3.48209	3.12504	4.972	5.45733	5.82075	4.55836	3.8413	3.9686	4.48439	8.86773	-0.660721	4.38334	maternally loaded
E(z)	5.55563	5.88682	4.38188	3.42562	4.32293	3.88627	3.54336	3.91589	4.12121	4.37296	3.83625	3.45971	3.20775	3.61206	5.12421	-0.431418	1.51215
alphaTub67C	8.63262	2.33185	0.784332	0.716764	0.146677	0.12737	0.0643989	0.0586631	0.228515	0.219427	0.484878	0.577423	2.54377	0.315313	8.23663	-0.395991	7.92131	maternally loaded
CG5026	6.19636	4.34223	4.30529	3.31495	2.86769	3.01096	3.13053	4.20931	4.52404	4.5161	3.69357	3.15691	2.94724	3.35724	5.44233	-0.75403	2.08509	maternally loaded
smg	8.84235	6.81076	6.08784	5.59601	3.21651	2.71795	2.63102	3.51418	3.61219	4.01963	4.14043	3.5468	3.78611	4.20005	8.09051	-0.751848	3.89045	maternally loaded
CG6511	3.81842	2.13944	1.99836	1.10385	2.12637	2.1804	2.06356	2.4812	2.46185	3.21088	3.31699	2.40789	2.4845	3.03853	3.694	-0.124421	0.655465
Cdc6	6.47815	6.23829	5.06623	0	0	0	0	0	0	2.32858	0	0	0	0	4.98498	-1.49318	4.98498	maternally loaded
mus301	4.70743	1.81412	1.69113	0.501239	1.16673	1.68681	1.47002	1.79494	1.81991	1.93967	1.04026	0.728918	0.922353	1.21391	4.12792	-0.579503	2.91401	maternally loaded
RecQ4	5.36607	4.61003	1.9529	1.05197	2.04011	2.24233	2.01045	1.55568	1.46779	1.57945	0.798084	0.551365	1.11189	0.854619	4.80569	-0.560379	3.95108	maternally loaded
nmo	6.29278	6.7661	6.52459	4.95977	3.61953	2.85358	2.44458	4.37948	5.4595	5.66926	4.95502	4.561	4.36436	5.35663	4.95169	-1.34109	-0.404942
CG8111	5.57194	3.74911	4.75796	3.49988	4.31619	4.28076	4.08708	4.43743	4.31368	4.75949	5.02759	4.64776	4.22953	4.73127	4.99893	-0.573017	0.267656
pbl	5.89099	6.60103	4.19514	3.59044	2.71026	2.48804	2.79597	3.66943	3.81756	3.98061	2.90988	2.61254	3.92883	3.22208	5.43596	-0.45503	2.21389	maternally loaded
CG7492	5.57326	3.98527	5.54395	4.12669	4.07846	3.70318	3.63484	4.68348	4.73086	5.07088	4.9861	4.65582	4.94255	5.09383	5.01852	-0.554741	-0.0753163
akirin	7.76944	9.1445	8.2327	6.37119	5.49335	5.6694	5.64554	6.64908	7.1261	6.95228	6.13025	5.46883	5.37545	5.89069	7.23231	-0.537127	1.34162
CG14834	0.127288	1.12592	1.95632	0.737195	0.784532	0.426044	0.289943	2.01272	1.90024	3.32134	3.17551	2.86616	2.79539	3.84722	6.9312	6.80391	3.08398	maternally loaded
Cdc27	5.9091	5.22252	4.98134	3.62865	3.48291	3.39963	3.28318	4.01758	4.29194	4.88927	4.825	4.30159	4.25886	5.10104	5.06855	-0.840555	-0.0324988
zpg	6.91191	1.67713	2.24043	0.937563	1.01412	1.01851	0.678995	0	0	0	0	0	0	0	6.98984	0.0779357	6.98984	maternally loaded
ndl	0.245281	0.341876	0.550368	0.220864	0.23814	0.12822	0.071133	0.0270404	0.107187	0.118477	0.235404	0.745152	0.320306	0.185813	4.92201	4.67673	4.7362	maternally loaded
D19B	5.05204	4.7948	5.20362	3.85831	3.83095	3.10622	2.90495	3.59436	3.59201	4.56384	3.7911	3.25656	3.04536	3.59049	3.88227	-1.16977	0.291777
CG5568	5.85901	3.61262	3.07187	2.12524	0.0107857	0.059106	0.0183547	0.0332011	0.0511687	0.0132335	0.17127	0.0368675	0.185036	0.0466837	5.40013	-0.458876	5.35345	maternally loaded
mad2	7.14367	6.93479	4.94194	3.07986	1.50213	2.01999	2.35322	4.15085	4.2818	4.87146	4.09808	3.4522	3.27345	4.45755	6.13676	-1.00691	1.67921
Bre1	6.55195	6.42848	5.37096	4.15814	3.88387	3.67013	3.26046	4.0933	4.30922	4.99769	4.22769	3.44522	2.91186	3.38444	5.65087	-0.901083	2.26643	maternally loaded
Sse	4.74563	4.10902	1.89067	0.530104	0.403564	0.547449	0.743609	1.42542	1.60153	1.54053	0.776576	0.4712	0.579788	0.603739	3.82017	-0.925461	3.21643	maternally loaded
CG10591	1.61123	2.23777	10.0354	4.16122	1.51572	1.69444	0.692664	0.0296297	0.0546629	0.0918126	1.27685	0.0329063	0.0999671	0	0.230451	-1.38078	0.230451
spo	1.74743	4.94707	0.875201	0.67582	0.0248005	0.0201823	0.0286468	0.0260564	0.0473806	0.0828511	0.159439	0.0216169	0.0616913	0.0366775	2.83117	1.08373	2.79449	not in e02
Tak1	5.58002	5.23103	5.2655	5.07934	4.61903	4.25153	3.91738	4.78206	4.73006	4.48574	4.14762	3.98663	3.86258	4.05078	4.89687	-0.683152	0.846092
Obp19c	0.107037	0.0602669	0	0	0	0.0658407	0.0356498	0.184556	0.0792071	0.100337	0.348985	0.0181274	0.230226	0.837714	6.99748	6.89045	6.15977	maternally loaded
Traf4	2.77102	7.91976	6.70598	3.9181	2.56579	1.77703	1.78037	2.79399	3.93608	4.94957	4.08184	3.87834	2.97604	2.04116	1.73669	-1.03434	-0.304477
CG15435	5.44938	4.26155	4.00997	1.59836	1.81409	1.9216	1.55946	3.1572	3.37738	4.09624	3.65934	2.57085	2.38919	3.36077	4.2161	-1.23328	0.855332
CG15443	4.52444	4.38051	3.90124	2.60628	2.88495	2.66302	2.38702	3.07579	3.32322	3.56004	3.1878	2.8025	2.73278	3.29026	3.76863	-0.755811	0.478368
CG15439	5.64638	4.85518	4.20445	3.09463	2.96737	2.41112	2.2142	2.94224	3.01453	3.7369	3.01175	2.34579	2.3825	2.30414	4.22676	-1.41962	1.92261
ft	0.7156	5.12776	4.69019	2.73081	2.63447	2.06827	1.85649	3.26431	3.69543	4.97039	3.99561	2.69569	1.68242	0.75884	0.116527	-0.599073	-0.642312
CG31961	5.24909	3.99953	3.92779	4.01416	3.11801	2.91808	2.77231	3.37556	3.882	3.86602	3.76704	3.59191	2.96425	3.25797	4.45991	-0.789182	1.20193
cutlet	4.21066	3.90763	2.04933	1.22225	2.06026	1.96987	1.67575	1.59621	1.78637	2.51097	1.81698	0.897784	1.47673	0.590918	3.71586	-0.494801	3.12494	maternally loaded
gkt	4.81311	3.79091	2.0727	0.922807	1.37282	1.64381	1.59353	2.24461	2.75667	2.8089	2.40761	2.00335	1.70178	2.41889	4.058	-0.755118	1.63911
CG9662	5.85791	5.39195	4.51567	2.45825	3.306	4.33866	4.08968	4.73507	4.98657	5.4619	4.76868	3.80385	3.41987	4.44026	5.24818	-0.609733	0.807917
CG3326	3.5719	2.95286	0.811139	0.286703	0.280982	0.410565	0.326529	0.874863	0.901035	1.06119	0.65884	0.535342	0.475439	1.08034	2.77435	-0.797545	1.69401
Mad	6.68668	5.3721	6.24113	5.05648	3.69732	3.57957	3.76888	4.84341	5.14794	5.41555	4.73067	4.33318	4.44673	4.49994	5.72167	-0.965017	1.22172
CG17260	4.48626	2.29748	2.82857	2.05844	1.6898	1.92389	2.36007	3.07932	3.35133	3.91775	3.88447	3.52692	3.22533	4.50908	3.56063	-0.925634	-0.948446
toc	5.46616	3.89423	4.26417	5.19732	4.35754	4.05596	3.16881	4.23425	4.17804	5.41924	6.15338	5.80133	5.85379	6.10681	5.23906	-0.227096	-0.867751
Cwc25	5.65346	5.75222	3.68946	3.46083	2.89955	3.1882	2.71533	3.11343	3.4435	3.80077	3.16725	2.58533	2.15696	2.8561	4.79445	-0.859006	1.93835
insv	6.53973	6.39568	5.09651	3.37519	0.680028	0.949669	1.13021	2.66088	2.84467	3.24208	2.56779	1.93035	1.80387	2.74873	4.8821	-1.65763	2.13337	maternally loaded
CG10880	5.35421	5.42249	4.21877	2.79697	2.27158	2.20813	1.9349	2.47314	3.04408	3.83537	3.31605	2.43785	1.57501	1.55686	4.59659	-0.757623	3.03973	maternally loaded
CG14352	4.58126	2.71189	3.57165	1.71868	1.40147	1.84017	1.53175	2.50577	2.64437	3.01468	2.43286	1.90094	1.30748	2.06433	3.80526	-0.775999	1.74093
Ipk2	5.69863	3.13835	2.83057	2.40291	3.12034	3.28019	3.10525	4.22945	4.30415	4.15165	3.36778	2.444	2.45931	2.64699	5.13164	-0.566991	2.48465	maternally loaded
CG13690	5.76579	6.13369	3.91937	1.53671	2.46162	2.59348	2.07597	2.53649	2.67389	2.71731	1.20712	0.644758	1.28672	0.501703	4.75774	-1.00805	4.25604	maternally loaded
CG5199	6.35695	5.53841	3.95843	2.56472	2.8422	2.49758	2.13908	3.14481	3.05373	3.50311	2.73804	2.06571	2.1667	2.26202	5.01516	-1.34179	2.75313	maternally loaded
DNApol-alpha60	5.53508	5.64502	3.35485	1.61031	3.30458	3.06882	2.28042	2.43306	2.3456	2.75822	1.62985	1.22659	1.5945	1.42962	4.69228	-0.8428	3.26267	maternally loaded
Spc105R	3.97088	4.68131	2.51919	0.648701	0.523337	0.688479	0.8629	2.24815	2.2741	2.94415	1.44386	0.99762	0.741499	1.27916	3.42841	-0.542474	2.14925	maternally loaded
CG3634	5.47914	4.83315	5.03679	3.42335	3.39093	3.14109	2.95062	3.65351	3.93941	4.49247	3.84098	3.08635	3.08156	3.56885	4.46152	-1.01762	0.892669
Mes2	5.34743	5.74016	5.52579	2.91498	2.52572	2.11943	2.22835	3.48037	4.00423	3.72663	3.15524	2.79968	2.0033	2.526	4.43619	-0.911233	1.91019
Osi14	1.87015	1.27147	4.44196	5.03731	3.1739	9.03906	6.57893	0.609989	0.714004	4.5544	2.8105	3.39496	0.901363	0.969297	0	-1.87015	-0.969297
CG31559	0.491242	0.692967	5.03682	3.16134	0.63525	4.00647	2.74421	0.858806	1.94421	2.85198	5.9661	1.78282	1.29667	0.779333	0.445466	-0.0457754	-0.333867
Atu	6.07042	6.30319	5.04723	3.5186	4.08707	3.89125	3.85435	4.64695	4.18832	4.77609	4.03561	2.85513	3.07656	3.40179	5.14633	-0.924084	1.74454
MED27	4.70921	5.50885	4.20147	2.70577	2.6718	2.78397	2.73426	3.5208	3.78913	4.37041	3.98026	3.38382	3.27881	4.31153	3.96513	-0.744079	-0.346404
CG1239	5.24362	3.94258	2.89499	0.888901	2.69309	2.43814	2.15191	2.44249	2.24788	2.93444	2.38189	1.51069	1.37515	2.05262	5.04193	-0.201689	2.98931	maternally loaded
asl	5.26633	5.73921	3.89013	2.67877	1.87552	2.04935	1.97961	3.19566	3.5214	3.98822	3.35124	3.00543	2.6731	3.54405	4.64925	-0.617082	1.10519
hd	5.93815	4.1354	2.19835	1.21573	2.4593	2.33311	1.80376	1.92024	1.61563	2.01333	1.12092	0.834888	1.29066	1.1796	4.80992	-1.12823	3.63032	maternally loaded
rpk	6.41749	5.95883	4.24234	2.51329	0.123097	0.224554	0.382889	1.51427	1.819	2.2633	2.15699	2.04946	2.02694	2.95799	5.94358	-0.473912	2.98559	maternally loaded
CG14036	7.75047	3.07625	1.47122	1.14209	0.817853	0.823114	0.684694	2.61523	2.6292	3.76703	3.85096	3.48201	3.58069	4.1008	7.0574	-0.693076	2.9566	maternally loaded
Bub1	5.51579	4.35452	3.88784	3.25929	3.24736	2.86356	2.79452	3.44803	3.63749	4.10451	3.81824	3.32192	3.17393	3.94743	4.66692	-0.848876	0.719483
CG12393	5.50083	5.87693	5.03036	3.9007	4.04576	3.86779	3.43888	4.10082	4.21768	4.40246	4.01646	3.57207	3.94465	4.15727	4.55668	-0.944152	0.39941
CG3430	6.02979	5.80339	3.07455	1.27189	3.02843	2.76913	2.29482	2.53846	2.52896	2.65681	1.56856	1.16758	1.479	1.24392	5.00863	-1.02116	3.76471	maternally loaded
CG4497	5.9127	4.70345	3.92461	3.13582	2.30201	1.8013	1.74354	3.32608	2.99121	3.88089	4.06895	3.79474	3.18383	3.86427	4.93543	-0.977266	1.07117
Nuf2	4.96065	5.55358	3.95213	2.22197	0.571868	1.09731	1.50269	2.9994	3.33347	3.68044	2.94172	2.49282	2.04154	3.31191	4.1337	-0.826951	0.821781
wg	0.931546	5.64527	4.4075	3.10735	1.85585	1.82102	1.5079	2.51951	3.36558	3.91731	2.71698	1.19489	0.70962	0.751007	0.211605	-0.719941	-0.539402
CG7102	3.08884	4.87529	2.66277	1.0932	1.28583	0.857201	1.07577	2.57268	2.62752	3.86	2.72455	1.78169	0.636179	0.243168	2.80865	-0.28019	2.56548	maternally loaded
CG7840	7.79745	6.10273	5.15348	3.17701	3.38934	4.78482	3.37656	3.63929	3.91419	3.82293	3.87983	2.78214	2.36522	3.32131	7.06496	-0.732489	3.74365	maternally loaded
CG18088	0.211752	2.42844	3.77757	0.779001	1.71425	1.55943	1.05743	1.13698	0.34981	0.128794	0.206331	0.09163	1.24265	0.481047	3.44992	3.23817	2.96887	not in e02
bib	3.14772	7.65908	4.74687	2.2382	0.830244	0.562393	0.875967	3.57802	4.43321	4.2747	3.3736	1.69881	2.02361	1.80727	1.18195	-1.96576	-0.625313
Ripalpha	5.79222	4.83481	2.8216	2.1959	2.04832	2.00451	1.71713	2.68456	3.09501	3.52098	3.23728	2.73844	2.02995	3.36287	4.95787	-0.834355	1.595
CG31875	4.20287	4.47918	3.34992	1.68094	0.724066	1.05084	1.01112	2.2572	2.60225	3.11667	2.86417	2.62785	2.66344	3.56145	3.50278	-0.700096	-0.0586722
me31B	10.1019	8.24971	6.40577	5.10191	5.35142	6.12807	5.55921	6.45427	7.15499	6.71666	6.2392	5.66885	5.17261	5.5336	9.89775	-0.204151	4.36415	maternally loaded
GATAd	4.95602	3.93822	3.87699	3.57953	3.07477	2.75272	2.29272	3.1066	3.91045	4.0434	3.73772	3.45107	2.7719	3.23906	4.4284	-0.527627	1.18934
Grip75	4.20699	4.42344	2.70536	1.87219	1.79798	2.01696	1.69863	2.74275	3.15744	3.51282	3.2123	2.741	1.64277	2.75146	3.9675	-0.239494	1.21604
CG6443	4.62233	5.2183	4.52535	3.60821	3.17029	3.0962	2.75805	3.55562	4.17661	4.22866	4.23119	3.56169	3.11743	3.93603	3.82906	-0.793269	-0.106967
CG7384	6.30714	3.7034	3.00851	1.48936	0.202739	0.305145	0.275073	1.84445	1.86479	1.4362	1.27263	0.8027	3.06807	1.82969	5.43193	-0.875214	3.60224	maternally loaded
YL-1	5.21647	5.48249	5.06383	3.82128	3.23122	3.42302	3.16818	3.69795	4.07985	4.45351	3.91381	3.40783	2.9253	3.52255	4.46396	-0.752512	0.941417
aub	5.21572	3.55986	2.29566	1.30301	1.0193	1.01096	1.31326	1.09142	1.41696	1.81286	1.59675	1.4663	2.08353	2.18955	5.58522	0.369507	3.39567	maternally loaded
piwi	6.14769	2.50228	1.02811	1.52791	1.62553	1.36282	0.619849	0.644647	0.928919	1.55566	1.51095	1.83204	2.80195	0.910138	6.19296	0.0452682	5.28282	maternally loaded
mre11	5.62791	5.20346	4.29038	4.34094	4.11925	3.89416	3.45895	4.32467	4.26884	4.59343	4.08204	3.78235	3.50781	3.94926	5.17958	-0.448332	1.23031
CG14937	1.95997	3.93843	1.47875	1.26757	1.17499	0.418148	0.368809	0.586642	0.892156	1.25716	1.68795	1.13813	0.93056	1.14463	0.445658	-1.51432	-0.698976
dgt2	5.46267	5.62224	5.13711	2.82087	2.81876	2.74748	2.66921	3.79475	3.73105	4.35498	3.06819	2.69918	2.52698	3.03432	4.64466	-0.81801	1.61034
esc	6.33073	5.79227	3.43313	2.11724	3.19198	2.57624	2.18462	2.49627	2.42858	2.73235	2.07175	1.67195	2.2164	2.33201	5.04665	-1.28407	2.71464	maternally loaded
A16	5.79847	5.76681	5.15433	4.18374	3.97244	4.03961	3.80409	4.93951	4.96366	5.35446	4.91478	4.19518	3.9164	4.42916	5.20433	-0.594141	0.775172
CG31813	4.45873	4.0192	11.37	9.91615	1.65483	4.19513	0	0	0.0596301	0.0383326	3.62719	0	1.77513	0.163658	0.250075	-4.20865	0.0864166
CG16865	5.28271	4.71667	4.51018	2.77249	3.0537	3.14337	2.89619	3.31416	3.5174	3.98886	3.37908	2.87548	2.59942	2.69932	4.30608	-0.97663	1.60676
Orc5	5.1174	5.56828	3.03816	0.896499	1.85211	2.0387	1.75676	2.25427	2.19824	2.70833	1.6992	1.13831	1.18365	1.76404	4.11007	-1.00733	2.34603	maternally loaded
tam	5.06145	4.22062	3.16652	2.05943	2.6487	2.71105	2.59591	2.0406	1.85224	2.40797	2.05445	1.63641	1.89332	2.36544	4.19828	-0.86317	1.83284
spel1	5.50433	5.2079	2.98391	1.65551	2.00459	1.89864	1.67496	2.78825	2.57155	2.84878	2.21299	2.14991	1.65859	2.56524	4.63487	-0.869454	2.06963	maternally loaded
Ku80	4.18887	3.72133	2.21661	0.933694	1.57772	1.88332	1.48505	2.35859	2.53079	3.34799	3.15042	2.36051	2.20942	3.17242	3.78762	-0.401247	0.615197
CycE	7.73497	6.81726	4.68189	2.73105	2.26763	2.39234	2.04982	3.10026	3.13408	3.70709	3.01182	2.19838	2.34349	3.15975	6.43222	-1.30275	3.27247	maternally loaded
BicC	8.83288	2.29694	0.507627	0.777286	0.0377255	0.0249341	0.0103591	2.27731	2.54063	3.93169	4.36733	4.40307	4.68299	5.53978	8.26739	-0.565493	2.72761	maternally loaded
fzy	7.16699	8.33144	6.07473	3.82917	1.24467	1.63268	2.05074	3.88701	4.17829	4.83192	3.70851	2.8092	2.71966	3.79113	5.55119	-1.6158	1.76006
grp	7.75366	6.41214	5.14192	3.75157	4.69575	4.42097	3.97761	5.35683	6.09079	6.72091	5.93346	3.70521	3.61719	3.8216	7.08228	-0.671378	3.26068	maternally loaded
CG15141	6.42982	6.52487	4.87336	3.82919	2.63668	2.60533	1.99164	4.1849	4.74581	4.79188	4.07811	3.31473	3.19252	3.87886	5.21369	-1.21612	1.33483
CG10336	6.17085	5.45412	4.03689	2.03792	2.95983	2.79023	2.3085	2.79042	2.56549	2.90931	1.64902	1.20507	1.83685	1.87705	4.96467	-1.20618	3.08762	maternally loaded
Grip71	6.2895	3.92901	3.65163	1.34353	1.09742	1.56158	1.45908	2.92116	3.26185	3.70283	2.92723	2.33084	2.07702	2.96843	5.50514	-0.784366	2.53671	maternally loaded
tup	0.545623	4.33181	5.07694	3.38723	2.78465	1.90085	1.8419	2.37768	3.0866	3.58998	2.61853	1.7576	2.03982	1.82473	0.670773	0.125149	-1.15396
tos	5.72172	4.2449	1.91328	0	0	0	0	0	0	1.79911	1.03988	0	0	0	5.22212	-0.499593	5.22212	maternally loaded
brat	7.30045	7.05626	6.70714	5.286	4.09187	2.85077	3.57903	5.21249	6.01221	6.59897	4.89813	3.15975	4.05168	2.71598	6.45133	-0.849125	3.73535	maternally loaded
dnt	4.43862	5.9763	5.30305	2.44998	1.97221	1.70022	1.1859	2.72088	3.98198	4.46464	4.39752	2.92765	1.81155	2.27409	3.51363	-0.924989	1.23954
gammaTub37C	6.95386	1.91487	0.738732	0.552569	0.066627	0.0637179	0.0230839	0.197402	0.218758	0.354565	0.445388	0.277322	0.920183	0.332204	6.20683	-0.747028	5.87463	maternally loaded
Top3alpha	4.75838	3.59076	1.98547	2.34492	1.78399	2.04915	1.90472	2.70954	2.34355	2.82709	2.0444	1.6239	1.72726	2.58542	4.27608	-0.482303	1.69066
CG33116	5.13812	6.06277	4.41059	2.80452	2.92079	3.58769	2.90231	2.85261	3.56651	3.66334	3.1042	2.05496	1.94055	2.27709	4.65721	-0.480917	2.38012	not in e02
scw	3.68728	0	0	0	0	0	0	0	0	0	0	0	0	0	0	-3.68728	0
fs(2)ltoPP43	6.62615	6.3897	5.52127	3.83774	3.45199	3.20412	3.34956	4.71529	4.88857	5.21287	4.63882	3.73632	3.69654	4.50841	5.28297	-1.34318	0.774566
lok	7.75351	6.00998	4.39561	2.82301	2.52387	2.21503	2.24366	3.04501	3.15269	3.7257	2.73499	2.07822	2.24374	1.75345	7.20255	-0.550964	5.44909	maternally loaded
CG8679	5.06072	3.73181	2.988	0	1.32113	1.60973	1.762	3.13182	0	3.65502	3.09033	1.86186	2.13597	1.84982	4.00491	-1.05581	2.15509	maternally loaded
Alh	6.29291	5.59442	6.22006	4.82383	4.00566	3.17037	2.63436	4.34858	4.76351	5.29443	5.27	3.9924	4.55716	3.73454	5.28074	-1.01218	1.54619
Osi20	1.97286	1.56045	4.29176	6.84224	3.09098	9.45755	7.23426	0.144381	0.0156152	1.99992	4.70988	10.8664	3.50749	0.361768	0.0232837	-1.94958	-0.338485
lds	6.26389	5.6307	3.64774	1.54209	2.19987	2.31287	2.17126	3.65489	3.95495	4.24838	3.45508	2.66103	2.46288	3.57992	5.71752	-0.546377	2.1376	maternally loaded
grn	0.503623	3.45822	4.9131	3.79262	2.94301	2.48697	1.88832	2.73101	2.88946	3.42686	2.35489	1.29666	1.64859	0.865823	0.166425	-0.337198	-0.699398
CG11755	4.18667	4.2056	4.18333	2.26494	2.56156	2.4958	2.33677	2.18267	2.22642	2.5847	2.79851	2.5976	1.95535	2.1852	3.76553	-0.421132	1.58033
osk	8.18227	2.67569	1.20556	1.24836	0.0143456	0.0396241	0.0122475	0.0111386	0.542761	0.0859118	0.381926	1.00283	3.84798	0.19889	8.69759	0.515323	8.4987	maternally loaded
neur	5.31892	7.38638	5.61852	3.48753	2.49126	2.26776	2.22644	2.97707	3.22062	4.61758	4.44517	3.23325	3.32548	3.76055	4.04053	-1.27839	0.279976
CG12420	2.06309	5.49614	0.95301	2.0954	0.945482	0.200316	0.0680507	0.331688	0.40846	1.15989	2.76435	0.479732	0.434529	0.173433	0.242371	-1.82072	0.0689376
Tango9	5.63404	3.70629	3.23989	2.83848	3.19327	3.35443	3.92005	6.66299	6.95581	6.37446	5.70205	4.84868	4.93002	5.57624	5.37648	-0.257566	-0.19976
CG3313	5.76264	5.20577	5.12536	2.73547	2.3924	2.21872	2.05308	3.49857	3.8083	4.68597	4.27872	3.59516	3.56507	4.48382	4.16714	-1.5955	-0.316675
CG10035	6.29268	11.1629	4.91391	4.36374	0.102783	0.0983481	0	0.126489	0.688023	0.284075	1.87723	0.710851	0.891801	0.69144	1.45534	-4.83734	0.763899
Men	6.08045	3.5907	6.53472	8.06956	8.32838	8.1852	8.19346	5.7285	6.44704	6.27167	6.39602	6.26623	7.58111	7.81255	7.01897	0.938523	-0.793582
Spc25	5.66222	5.70804	5.12948	3.01482	0.575693	1.45995	1.56187	3.37277	3.42079	3.83642	0	0	0	0	4.56185	-1.10038	4.56185	maternally loaded
Su(var)3-7	6.56702	5.78544	5.00332	3.68444	2.79188	2.67146	2.49998	3.65135	3.81122	4.46314	3.83256	2.96312	2.54735	3.11351	5.59155	-0.97547	2.47804	maternally loaded
yellow-e3	1.65794	6.46613	7.26369	1.62047	0.120321	0.165018	0.289958	1.4257	1.09076	0.247213	0.360734	0.0531131	0.0817665	0.0671552	0.149891	-1.50805	0.0827363
Orc2	5.48448	5.08097	2.9486	0.827364	1.81853	1.89057	1.54285	2.16335	1.848	2.25525	0.989489	0.68634	1.04985	1.11971	4.58926	-0.89522	3.46955	maternally loaded
pr-set7	5.73909	6.18669	4.42921	2.93112	3.00217	2.94224	2.45585	3.35863	3.9671	4.15897	3.50501	2.75267	2.96097	2.72648	5.07369	-0.665406	2.34721	maternally loaded
Rad17	4.5437	3.03302	2.6412	1.57745	1.43988	1.47749	1.29947	1.96471	2.50346	2.78474	2.41056	1.93523	1.37935	1.87874	3.8435	-0.700198	1.96476
CycC	5.45738	6.07091	4.79422	3.31249	3.51963	3.61785	3.18168	3.77837	4.34396	4.46682	3.94768	3.29205	2.86083	3.27044	4.55037	-0.907013	1.27992
ear	5.55375	4.57625	4.51903	3.95953	3.32938	3.0317	2.70834	3.63738	4.00054	4.65367	4.33097	3.68789	3.15766	4.18981	4.67752	-0.876228	0.487711
spn-E	5.31407	2.34846	1.2053	0.988694	0.74841	0.753471	0.723288	1.18538	1.43418	1.70457	1.36687	1.15083	1.57382	1.74833	4.70283	-0.611238	2.95451	maternally loaded
srp	2.57659	5.78953	5.06729	4.7811	3.93088	3.45684	4.00017	4.81264	4.87941	4.47507	4.37715	3.42854	3.815	3.6913	4.27824	1.70165	0.586935
CG5013	3.3064	5.05173	4.32111	2.46336	2.52864	2.68942	2.43864	3.47472	3.67663	3.99076	3.52145	2.60371	2.16684	2.80423	3.23402	-0.0723823	0.429795
Det	5.27711	6.10203	4.46046	1.94472	1.43933	1.52419	1.87005	3.18657	3.58709	3.96156	2.82355	2.19698	1.69682	2.77535	4.66883	-0.608282	1.89348
CG31251	3.46899	2.96643	2.57537	0.696654	1.1789	1.60209	1.37105	1.94943	2.05646	2.90924	2.42744	1.67471	0.792875	1.68381	3.03023	-0.438757	1.34642
CG14317	5.46172	3.60841	0.754988	0.560771	0	0.0121764	0	0.0236298	0.0292598	0.210239	0.212827	0.0262489	0.110953	0.0167311	0.604769	-4.85695	0.588038
CG14309	0	0	0.0631636	0.0388931	0.0114441	0.00470816	0.0193922	6.28415e-07	0.0165367	0.0753179	0.103289	0.0816584	0.11088	0.0184033	6.85056	6.85056	6.83216	maternally loaded
CG7208	6.48242	1.79013	0.673443	0.404402	0.186694	0.35543	0.568015	2.69028	2.78283	4.1628	4.38449	4.28025	4.05623	5.11597	5.69711	-0.785308	0.581138
gwl	7.28658	5.80758	4.82618	3.45967	0.901701	0.843354	0.930716	2.38789	2.87262	3.22208	2.40985	1.70933	2.06714	2.47491	6.68308	-0.603497	4.20817	maternally loaded
dnk	8.11676	8.13401	6.75156	4.46064	4.82617	4.98566	4.23159	4.13882	3.9342	4.09442	3.85481	2.98061	3.54082	3.06527	6.71009	-1.40667	3.64482	maternally loaded
CG3773	4.83158	3.74405	3.76242	2.52963	2.83036	2.84646	2.62913	3.20794	3.6145	3.6892	3.25548	2.53163	2.00479	2.55372	4.46163	-0.36995	1.90791
Dl	5.82922	7.68147	5.38325	3.21898	1.95832	2.16796	2.25873	3.51833	3.95428	4.53401	3.9582	3.12243	2.38595	1.97656	4.75257	-1.07665	2.776	maternally loaded
trem	5.23242	5.03826	4.08901	2.7307	2.69079	2.21577	1.90861	2.89311	3.20638	3.81763	3.46048	2.94027	2.81262	3.41008	3.91884	-1.31357	0.508768
mira	3.86539	8.24999	7.29008	4.36124	2.09473	2.08938	2.16615	2.9983	3.10646	2.75291	0	0	1.24476	1.70209	0	-3.86539	-1.70209
SNF4Agamma	6.63528	5.08821	6.18136	6.31569	5.67355	5.19005	5.21201	5.22363	5.61045	5.44488	5.59981	5.59974	6.18399	6.01236	6.13879	-0.496489	0.126428
DNApol-alpha180	5.15805	5.88317	2.62288	1.7534	2.63083	2.77405	2.27642	2.64997	2.5693	2.6322	1.18877	0.835699	1.52904	0.778695	4.72559	-0.432466	3.94689	maternally loaded
fit	0	0.0277525	2.41297	0.204293	0	0	0	0.271563	0.522896	0.914878	0.720651	0.325741	0.456701	3.03007	8.2257	8.2257	5.19563	maternally loaded
loco	4.94087	5.29895	5.72593	4.75768	3.87714	3.75783	3.33465	4.86824	5.59209	4.99694	4.67923	4.00249	3.64965	4.31718	4.17594	-0.76493	-0.141246
CG33107	4.79248	4.56591	2.80763	1.79083	2.1227	2.20643	1.79795	2.53684	2.50361	3.29441	3.05193	2.5812	2.38848	3.1828	3.90768	-0.884796	0.724882
EloA	6.03869	5.7007	4.65457	3.77642	3.02071	3.22636	2.97254	3.7284	4.18143	4.12497	3.99046	3.51842	3.40463	4.01868	5.15178	-0.886916	1.1331
CG4449	4.85031	4.98525	2.77926	1.78396	1.48323	1.57914	1.45987	3.1044	3.42855	4.31936	4.03572	3.55292	2.69924	4.09877	4.55082	-0.299489	0.452047
CG13599	4.76689	5.80254	3.71555	1.67934	0.740617	1.14594	1.08464	2.35594	2.74179	2.90785	2.20976	1.61401	1.26865	2.29462	3.99093	-0.775964	1.69631
Pli	5.57783	6.30409	6.78481	5.08854	3.40358	3.09255	2.81105	5.47457	6.61157	5.63901	5.10373	4.27227	4.01303	3.84779	4.86626	-0.711571	1.01847
Tsc1	5.71897	4.11383	4.35342	3.77449	3.77195	3.57404	3.50881	3.84848	3.89225	4.14978	3.84206	3.35799	3.33574	3.96107	5.25014	-0.468832	1.28907
Apc2	5.72202	4.95797	3.90537	2.3341	1.62877	1.67002	1.82316	2.89087	3.41451	3.67514	2.63468	1.71263	2.36491	1.96993	4.53561	-1.18641	2.56569	maternally loaded
BRWD3	5.95077	5.95059	4.42635	4.19098	3.57711	3.21091	2.95438	3.83841	4.13713	4.62185	3.80168	3.12002	3.47997	3.32624	5.17386	-0.776908	1.84762
asp	6.14268	5.81541	3.06799	1.40297	0.742609	1.03443	1.5028	2.98298	2.7719	3.55593	2.6579	2.35966	2.28833	3.25114	5.49454	-0.648139	2.2434	maternally loaded
polybromo	6.27506	6.69988	4.81061	3.90135	3.45114	3.36082	3.22506	3.67791	3.64131	4.14038	3.06978	2.59807	2.43419	2.98277	5.35506	-0.920002	2.37229	maternally loaded
dan	2.61933	7.2235	3.23119	2.66706	1.90834	0.786677	0.503672	1.56195	1.72178	2.12799	1.72474	0	0	0	0.230267	-2.38906	0.230267
Tsp97E	6.29559	6.51817	5.71	5.1864	4.85439	4.36641	4.40149	4.65766	6.46814	5.55939	5.31641	4.84166	4.73331	4.78661	5.55611	-0.739484	0.769498
ball	6.78131	7.32814	5.46528	3.43469	2.74462	2.96732	2.9941	4.4813	4.27492	5.08733	3.96704	3.38435	3.47426	4.40248	5.60569	-1.17562	1.20322
l(3)mbt	5.7326	4.76702	4.24281	4.02596	3.95334	3.25152	3.08836	3.28705	3.45219	4.15648	3.81335	3.45824	3.7146	3.98869	4.65683	-1.07577	0.668135
CG1523	5.47075	5.28905	5.17365	3.63792	3.504	3.36663	3.29052	3.62135	4.02822	4.45675	4.21983	3.43251	3.13101	3.59362	4.46478	-1.00597	0.871163
stg	7.20884	7.30834	6.92023	3.92678	1.83409	1.50802	2.31744	3.81436	3.85848	6.20914	3.30693	2.90905	2.46497	0.770024	6.23422	-0.974621	5.46419	maternally loaded
Slbp	7.07178	7.9692	5.15677	3.24285	4.23537	3.81392	3.26878	4.01153	3.83838	4.4069	3.92235	3.58667	3.77413	4.61459	5.99959	-1.0722	1.385
dgt6	5.47942	4.83457	3.89448	2.54618	1.15159	1.02572	1.19621	2.35594	2.3848	3.06664	1.72722	1.22276	1.37588	1.82321	4.43243	-1.04699	2.60922	maternally loaded
Slu7	4.81147	5.50979	4.57789	3.67612	3.32907	3.45756	2.88595	3.37195	3.64079	4.0362	3.64738	3.10143	2.86802	3.37291	4.15137	-0.660094	0.778459
ncd	6.47602	6.83504	5.30091	3.64764	1.94102	2.32518	2.55786	3.98627	3.82524	4.79348	3.03345	2.58426	3.03624	3.36569	5.08342	-1.3926	1.71772
CG7609	5.0266	3.76689	3.11605	2.75599	2.5758	2.31989	2.28752	2.38917	2.57416	2.94395	2.36564	1.89588	3.10783	2.27222	4.21754	-0.809058	1.94532
Axn	5.64088	5.59898	4.87692	3.9556	3.52937	3.22021	2.86403	4.02285	4.26856	4.83658	4.2593	3.30985	3.12885	3.5059	4.97385	-0.667034	1.46794
Sry-alpha	5.19011	4.58795	3.18913	1.79307	0.443648	0.555427	0.530467	0.735888	1.04366	1.54548	1.15676	0.599558	0.791897	0.783935	1.62942	-3.56069	0.845487
rod	4.88599	4.47747	2.43069	0.68009	0.753361	1.07064	1.35371	2.73728	2.54772	3.14206	1.77158	1.1521	1.31961	1.72589	4.19167	-0.694316	2.46578	maternally loaded
pygo	5.95478	4.9805	4.45575	3.4775	2.48114	2.25105	2.15168	3.0525	3.36663	3.93338	3.50065	2.81612	2.37092	3.28695	4.95111	-1.00368	1.66416
CG31002	0.788506	4.48308	6.83628	2.80697	0	0.32761	0	0.0382236	0.26287	0.0600614	0.421369	0	0.0908338	0.143139	0.120555	-0.667952	-0.0225841
ttk	5.52494	5.56579	7.41647	4.49886	4.52763	4.38792	3.76557	4.3784	5.46084	6.12183	5.48139	5.03932	4.11681	4.09916	5.60134	0.0764054	1.50218
ttk	5.52494	5.56579	7.41647	4.49886	4.52763	4.38792	3.76557	4.3784	5.46084	6.12183	5.48139	5.03932	4.11681	4.09916	5.60134	0.0764054	1.50218
Acf1	6.30606	6.22474	4.52117	3.05008	3.60946	2.78883	2.50538	3.55683	3.78316	4.38871	3.66999	3.19416	3.30122	3.21478	5.6106	-0.695454	2.39582	maternally loaded
CG17018	7.08721	3.78262	1.281	1.13402	0.67777	0.756135	1.0126	1.40292	1.91656	2.04803	1.99369	1.47913	1.34607	1.69695	7.02289	-0.0643126	5.32595	maternally loaded
EcR	4.62381	3.92078	4.5847	4.35694	2.67557	2.82955	2.96482	5.40075	3.32547	5.33021	4.66311	3.72642	2.89756	2.59262	4.00542	-0.618389	1.4128
BubR1	5.10286	5.88071	3.52833	2.35038	0.952318	1.10317	1.28348	2.83865	2.9198	3.21802	1.87246	1.37982	1.22743	1.80121	4.23364	-0.869213	2.43243	maternally loaded
d4	6.80562	6.74933	5.90364	4.99381	4.19187	3.87378	3.68343	4.78791	5.12354	5.66755	5.32697	4.75212	4.08038	4.94701	6.10004	-0.705583	1.15303
CG10465	5.82876	6.1082	5.30343	4.18953	4.01235	4.61177	4.13598	4.95694	5.65256	5.5521	5.324	4.78009	3.64993	4.36805	5.71929	-0.109476	1.35124
geminin	8.35131	8.43003	7.15754	5.42232	4.75209	4.67274	4.22265	5.23314	5.25927	5.85485	4.67901	4.08009	4.20196	4.69136	6.95246	-1.39885	2.2611	maternally loaded
rig	6.40567	3.10093	1.43712	1.6455	2.29805	2.60093	2.73007	3.44201	3.28962	3.89727	3.03831	2.20649	2.14912	2.68185	5.57997	-0.825692	2.89812	maternally loaded
CG13427	7.34023	11.5257	7.37221	3.73437	0.25875	0.304036	0	0	0.04475	1.44828	3.40512	0.260183	2.01989	1.28386	1.93586	-5.40437	0.652001
CG11788	4.37467	3.67298	2.77361	1.24639	2.14505	2.586	2.14105	2.52949	2.45609	2.79435	2.05322	1.60879	1.74523	1.72017	3.7797	-0.59497	2.05953	maternally loaded
par-1	6.61755	5.14584	6.35262	6.54005	5.94363	5.52239	5.41248	5.87983	6.19776	6.32879	6.03964	5.73815	6.48457	5.78058	6.39793	-0.219618	0.617354
hrg	5.3061	4.45424	4.99384	4.3325	4.3481	3.91003	3.75167	5.05861	5.39497	5.47227	5.04115	4.32791	3.94637	4.3103	4.66229	-0.643808	0.351994
rib	2.43067	7.44482	7.62081	4.34892	3.30218	1.33262	0.304131	1.11623	1.01468	2.11257	2.26197	1.83414	1.96072	2.90686	0.222341	-2.20832	-2.68452
Topors	5.64466	4.63007	3.94508	3.20154	2.81171	2.2701	2.26832	3.18703	3.51979	4.33739	4.00968	3.38973	3.1977	4.19138	4.71077	-0.933888	0.519392
nopo	5.05215	4.12396	1.92495	0.613716	1.53217	1.36852	1.29359	1.74238	1.82948	2.2498	1.89429	1.41682	1.15765	2.33209	4.54878	-0.503364	2.2167	maternally loaded
sub	5.85578	6.44871	3.84692	1.55319	0.784937	1.05226	1.47627	3.09611	3.19244	4.03004	3.45968	2.94775	2.67783	3.69425	4.71905	-1.13673	1.0248
CG30105	4.33398	5.18217	3.46668	1.44199	2.0347	2.16286	1.8396	2.56969	2.6856	3.09644	2.46333	1.85012	1.56491	2.27476	3.80164	-0.532337	1.52688
CG14478	7.24862	7.06746	5.88224	5.8491	4.48687	3.90797	3.50611	4.93385	6.00017	5.38914	5.06339	4.28977	3.96804	4.16129	6.1837	-1.06492	2.02241	maternally loaded
tef	4.98178	4.43194	3.24086	0	0	0	0	0	0	0	0	0	0	0	4.55941	-0.422372	4.55941	not in e02
CG30100	0	0	0	0	0	0	0	0	0	0	0	0	0	0	0	0	0
CG4282	5.11516	4.56793	3.95353	2.54459	1.93767	1.97694	1.78911	2.62153	3.03707	3.43236	2.78758	1.97733	1.49278	1.85678	4.2373	-0.877859	2.38053	not in e02
krimp	6.00545	1.73595	0.793574	0.535254	0.730314	0.864426	1.42837	3.45648	3.5649	4.05646	3.09023	2.49531	2.04395	2.79556	5.15544	-0.850006	2.35988	maternally loaded
CG30094	4.18838	4.33529	3.6727	2.54929	2.31713	3.02736	2.53491	3.19691	3.56807	4.00253	4.52576	4.09163	3.16231	4.44331	3.63568	-0.552692	-0.80763
CG8441	5.16806	5.60371	4.7508	3.14995	2.96786	3.53989	3.25848	3.86992	3.99689	4.43637	3.98815	3.15147	2.21455	3.35901	4.73409	-0.433974	1.37508
CG8180	8.13163	1.69611	2.42435	4.24485	3.40171	2.29704	3.54636	3.28146	4.54725	4.45516	4.17641	3.83872	3.53304	3.70334	6.8093	-1.32233	3.10595	maternally loaded
dup	7.24271	7.32998	5.67513	4.38087	3.35388	3.18923	2.84323	3.14141	3.11979	3.40335	2.54409	1.83413	2.25797	2.21743	6.12083	-1.12188	3.9034	maternally loaded
Pms2	4.62687	3.31257	2.00971	1.1539	1.2898	1.6028	1.2656	2.47934	2.87973	3.18678	2.72214	2.18409	1.6529	2.78544	3.96092	-0.665946	1.17548
CG10265	4.82738	4.36216	3.47305	1.77239	1.64612	1.61444	1.52317	2.63079	3.00771	3.88254	3.54519	3.05479	2.27657	3.59898	4.03787	-0.789503	0.438896
Ercc1	4.61674	1.76437	1.39778	0.810812	0.976806	1.52388	1.57764	2.39426	2.61498	3.21122	2.36079	1.35664	1.23329	1.77478	3.68439	-0.932348	1.90961
SMC2	5.35019	5.82772	3.92899	2.6268	1.1695	1.76841	2.00241	3.34444	3.30598	3.67163	2.16915	1.48827	1.4062	1.90378	4.52776	-0.822431	2.62398	maternally loaded
mars	6.56073	6.22421	4.95882	3.25449	1.05324	1.51587	1.80944	3.77518	3.50858	4.85379	3.99581	3.5094	3.47107	4.62441	5.16854	-1.39219	0.544133
cnn	5.89842	6.3217	5.48295	4.50408	3.21271	2.52591	2.48427	4.08432	5.11965	5.64826	5.44386	5.77932	4.99603	5.62829	5.12474	-0.773679	-0.503551
lat	0	4.60078	0	0	0	0	0	0	0	0	0	0	0	0	0	0	0
sca	2.8334	8.05419	4.08065	3.64125	3.24163	1.71435	1.0833	2.9922	3.56018	4.06767	3.30721	2.32271	1.98211	1.3379	0.424873	-2.40853	-0.913025
muskelin	7.08238	4.85372	3.94192	2.91896	2.03717	2.20074	2.41839	2.79384	2.83328	3.01258	2.87367	2.40458	2.35904	2.58999	6.56721	-0.515166	3.97722	maternally loaded
ana3	4.87994	4.09535	2.00458	0.54486	0.612817	0.804468	1.07386	2.35289	2.44339	3.02924	2.39754	1.72821	1.36376	2.62307	4.22841	-0.651525	1.60534
CG13159	4.25063	3.87686	10.5478	9.22416	2.537	4.00388	2.27053	0.412703	0.349279	0.0617027	3.41005	0.316702	0.617672	0.108325	0.495219	-3.75541	0.386894
dgt5	5.32483	4.57428	2.85504	1.33529	0.741245	0.960237	1.19817	2.32284	2.49812	2.70176	1.59154	1.01356	0.799473	1.55674	4.40239	-0.922437	2.84566	maternally loaded
Sr-CII	2.55601	7.31885	1.66886	0.747969	0.087504	0.0776726	0.0830747	0.392359	0.479692	0.935771	1.27108	1.02609	1.03624	1.90029	0.22641	-2.3296	-1.67388
Vhl	3.12578	3.66092	3.68742	3.00376	2.70783	2.33646	2.22169	2.8335	2.94316	3.05015	2.8863	2.53183	2.74559	3.16769	2.99622	-0.129565	-0.171472
CG12343	4.80353	5.54665	5.47	4.2517	3.16159	3.60526	3.09565	4.18532	4.57944	4.73519	4.70023	4.10094	3.2212	4.49137	4.31727	-0.486264	-0.174098
Mat1	5.55246	4.19089	3.48227	2.20143	3.24084	3.38651	2.96904	3.8058	3.62665	3.96638	3.55805	2.70106	2.54527	3.4455	4.79942	-0.753036	1.35392
Caf1-105	6.4684	5.58081	3.14498	1.26207	2.70665	2.36362	1.92264	2.68586	2.74011	3.30479	2.56247	2.25148	2.40496	3.15002	5.45857	-1.00983	2.30855	maternally loaded
Cyp49a1	0	0	0	3.2278	2.65467	4.63092	3.65969	0	0	0	4.10277	4.04016	3.06426	3.42639	1.72432	1.72432	-1.70207
CG11825	5.82368	5.87362	5.55507	4.33362	1.31969	2.33495	2.26455	0.973301	1.42445	4.37567	4.1198	2.47934	2.66899	1.49817	5.07258	-0.751094	3.57441	maternally loaded
CG12744	3.5557	5.05828	4.9082	2.73895	3.10667	2.76867	2.49101	2.48932	3.75448	3.87615	3.69112	2.79374	2.44811	2.50306	5.08147	1.52578	2.57841	not in e02
CG12129	5.71951	4.24243	3.86423	2.69859	2.49246	3.53784	3.41072	3.78763	4.04214	4.57203	4.05637	3.25005	2.05578	3.70295	5.24578	-0.473732	1.54283
Mef2	5.2214	5.87534	6.35879	5.4739	5.17545	4.39032	4.58613	4.58576	4.30972	5.85515	5.55245	5.10799	4.94527	4.71022	4.62424	-0.597159	-0.0859719
Orc6	5.37635	4.7031	3.49932	1.5074	2.1663	2.41427	1.71252	2.20591	2.19893	2.05474	1.50842	0.679931	1.33412	1.02468	4.51326	-0.86309	3.48858	maternally loaded
Pkn	5.47841	5.26433	5.28019	5.34932	4.11072	4.20945	3.78226	5.09522	5.6685	5.58391	5.76512	4.57624	4.11245	5.07024	5.01102	-0.467392	-0.0592232
CG14756	1.98764	2.11232	9.50394	4.87006	0.254116	2.11956	0.0424698	0.148791	0.0711386	0.471998	1.64346	0.105001	0.379091	0.0807311	0.203061	-1.78458	0.12233
scra	7.06349	7.63869	5.70485	3.6035	1.5132	2.12836	2.74394	4.55259	4.50194	5.57251	3.75837	2.59655	3.13614	3.46928	5.52934	-1.53415	2.06006	maternally loaded
Orc1	7.18313	6.11238	5.22413	3.60695	2.60808	2.36638	1.92168	1.99665	1.90261	2.30999	1.04498	0.612032	1.39482	0.608234	5.7135	-1.46963	5.10526	maternally loaded
Incenp	7.19736	7.47708	6.02141	3.67461	1.45719	1.99644	2.58242	4.38745	4.13985	4.98867	3.35543	2.72534	3.0149	3.86136	5.73082	-1.46654	1.86946
CG1620	6.33109	5.3713	3.82927	3.29574	4.08177	3.66021	3.74191	4.67909	4.94773	5.35638	4.52148	3.94846	4.13243	4.47424	5.90739	-0.423705	1.43314
CG11141	5.37307	4.1619	3.8589	3.20097	2.50047	2.00749	1.9612	4.15821	4.23594	5.03919	4.68502	3.91821	3.85566	5.18054	4.10038	-1.2727	-1.08017
lola	9.15295	9.4858	8.7776	7.73298	6.66418	6.08561	5.99495	6.9017	7.2056	7.4524	7.24299	6.46735	6.41875	6.54201	8.29839	-0.854564	1.75638
lola	9.15295	9.4858	8.7776	7.73298	6.66418	6.08561	5.99495	6.9017	7.2056	7.4524	7.24299	6.46735	6.41875	6.54201	8.29839	-0.854564	1.75638
nxf2	5.07515	4.73427	3.54639	2.10405	0.533418	0.904077	0.996435	2.12696	2.21047	2.60588	1.50067	1.0534	1.11593	1.47631	4.64781	-0.427339	3.1715	maternally loaded
fab1	4.05175	5.10883	3.26503	2.91714	2.67224	2.7024	2.73298	3.94922	3.91113	4.79908	4.84091	4.87968	3.38921	5.23423	3.57562	-0.476128	-1.65861
mael	5.9981	4.25129	3.72541	2.56592	1.0189	1.13815	1.425	2.3329	2.52166	3.27392	3.33704	2.81596	2.67927	3.86551	5.55936	-0.438744	1.69385
cerv	4.19611	4.31203	4.43849	2.24196	2.24002	2.41038	2.42602	2.98138	3.03073	3.85558	3.21394	2.49607	2.05857	2.73263	3.5102	-0.685915	0.777569
CG1677	7.46302	7.05784	6.61025	5.54962	5.59657	5.00324	4.69342	5.28782	5.49703	6.08831	5.442	4.70646	4.79228	4.84552	6.40389	-1.05912	1.55838
pnt	2.3203	5.4761	4.85311	4.54901	3.59976	2.94937	3.04996	3.58482	3.20167	4.09452	3.81504	3.6371	2.71871	2.96129	2.96682	0.64652	0.00552922
gdl	0	0	0	0	0	0	0	0	0	0	0	0	0	0	0	0	0
His1:CG33801	0	0	0	0	0	0	0	0	0	0	0	0	0	0	0	0	0
CG34008	2.84579	3.38439	1.67591	0.776843	0.5032	0.836343	0.732569	1.61266	1.69533	1.91683	1.39382	0.807277	0.744448	0.660079	2.24337	-0.602423	1.58329
Chrac-14	6.85097	7.11626	5.25945	3.95156	3.72815	3.92905	3.3555	3.90661	3.85431	3.98481	2.56612	2.14662	2.33772	2.19529	5.69057	-1.1604	3.49528	maternally loaded
Ada2b	7.09775	5.64479	4.95392	3.90975	3.42676	3.17243	3.22939	4.39508	4.52735	4.63607	3.971	3.29297	3.20309	3.48126	6.31428	-0.783473	2.83302	not in e02
seq	3.82681	5.7912	5.28623	4.74119	4.08167	2.41716	2.26664	3.73971	3.7939	4.243	3.69419	2.78482	2.92125	3.45687	3.03785	-0.78896	-0.419016
Ext2	2.94303	3.47429	3.18634	1.67724	0.780075	0.0129033	0.00589718	0.00833279	1.21926	0.92773	1.90035	0.733685	0.00228282	0.000782339	0.106293	-2.83674	0.10551
tefu	3.34129	2.75397	1.11835	0.781251	1.31315	1.5655	1.60498	2.48026	2.59555	2.58172	2.08749	1.62023	1.28315	2.4937	3.18479	-0.156505	0.691084
l(3)neo38	2.80317	7.50543	7.42867	5.10125	4.37294	3.21071	2.84694	5.14308	5.67699	5.94845	4.88345	3.07416	3.56187	3.2466	2.39483	-0.408341	-0.851774
cta	5.00788	4.05972	4.24076	2.97235	2.5278	2.32037	2.38367	3.15471	3.60328	3.70033	3.25863	2.31776	2.26456	2.25645	4.49022	-0.517665	2.23376	not in e02
CG34174	3.60649	3.73389	2.76329	0.859694	2.02032	2.10762	1.73452	2.60661	2.9141	3.05331	2.40183	1.43913	0.944885	1.48358	3.16137	-0.445123	1.67779
CG34183	3.86971	3.67212	2.72388	1.31056	1.85062	2.51495	2.33507	2.86755	3.30624	3.44154	3.02556	1.90623	1.35712	2.33655	3.61287	-0.256842	1.27632
CG34214	5.42529	4.76594	0.852466	0.689572	0.642715	0.440926	0.0674771	0.284103	0.216637	0.665252	0.749228	0.446781	0.624677	0.352455	0.78802	-4.63727	0.435565
CG34261	4.57328	4.035	2.97412	1.28496	0.385564	1.12567	1.10532	2.08359	1.96283	1.9609	1.3653	1.15488	1.13358	2.01829	4.09415	-0.479123	2.07586	maternally loaded
CG34401	5.5865	5.99543	4.64937	4.28845	3.56526	2.61173	2.57399	4.07126	4.4294	5.10186	4.13212	3.41172	3.30547	3.45971	4.63449	-0.952012	1.17478
egg	5.62604	6.05579	4.38803	3.29998	3.23289	3.06045	3.00059	3.65353	3.69371	4.34343	3.3906	2.67453	2.38507	2.99792	4.61496	-1.01108	1.61704
stumps	1.38208	6.04874	5.45356	4.4655	3.52149	3.56077	2.59855	3.36496	4.11373	4.83511	4.3992	4.71758	3.16963	3.48591	1.69845	0.316378	-1.78746
Trf2	5.36737	5.66166	3.8772	4.25957	3.33155	2.69476	2.75856	3.97487	4.08221	4.40987	4.28046	3.7871	3.45555	4.13044	4.84861	-0.518758	0.718176
CG13373	5.96808	3.44621	3.00986	1.94138	3.34339	3.2084	2.31958	3.03391	3.18916	3.87176	3.0043	2.8634	2.87757	3.43921	5.16383	-0.804257	1.72461
MED21	5.79163	5.44435	5.36889	3.55263	2.89326	3.44024	3.00696	3.59799	4.10706	4.24158	4.10452	3.4185	2.11038	2.66867	5.25982	-0.531809	2.59115	maternally loaded
jing	5.06958	6.36991	5.83002	4.29632	3.48173	2.08055	2.11057	3.86229	4.8161	4.96653	4.1231	3.0408	2.6499	2.43011	4.18224	-0.887341	1.75212
CG33096	6.34358	6.83649	5.74046	4.47603	3.44549	3.38341	3.17756	4.80934	5.55697	5.27575	4.74631	4.00527	3.62029	4.02037	5.45914	-0.884442	1.43877
DNApol-alpha73	6.15852	5.79086	3.0025	1.81983	3.2605	2.90353	2.37224	2.14339	2.04614	2.40465	1.334	1.13777	1.91128	1.45409	5.01605	-1.14246	3.56196	maternally loaded
pes	6.45112	4.33373	4.54806	4.493	4.06215	3.86718	3.61583	4.41855	4.71662	3.68252	3.22029	2.88791	4.35987	4.16102	6.0269	-0.424219	1.86588
CG18190	7.21998	5.5422	3.38473	1.73644	1.06445	0.931145	1.72007	3.53402	4.01268	4.65874	4.45321	2.73324	2.13087	3.44515	6.87974	-0.340239	3.4346	maternally loaded
CG6091	5.85009	4.92239	4.65849	4.3211	3.8636	3.25513	3.30434	4.87694	5.31489	5.91607	5.95819	5.80269	5.85668	6.92152	5.0755	-0.774597	-1.84602
CG7504	4.82416	3.71729	2.13038	1.1409	0.96426	0.983837	1.09412	1.70148	1.6992	2.08195	1.56198	0.863857	0.596172	1.30785	4.27548	-0.548679	2.96763	maternally loaded
dgt3	4.49736	2.56365	1.6823	0.472916	0.502421	0.830362	1.34746	2.5197	2.70648	3.14898	2.05741	1.45102	1.32419	2.52765	3.67438	-0.822975	1.14673
hang	6.83464	6.51236	5.23939	4.94603	4.70986	3.44137	3.51624	4.5484	4.62671	5.35888	4.63197	3.58978	3.37128	3.40822	5.97109	-0.863545	2.56288	maternally loaded
CG34025	0.349522	5.16463	0.444872	0.230743	0.0187032	0	0	0.426625	0.474288	1.28813	1.29936	0.873935	0.340218	1.17512	0.0531722	-0.296349	-1.12195
not	5.73609	5.13749	4.64931	2.77261	3.11845	3.18649	2.84758	4.14339	5.00469	4.82455	4.07233	2.81695	2.44992	3.08323	4.40826	-1.32783	1.32503
cup	7.97789	3.56813	2.38727	1.87714	1.46148	1.58986	1.73987	4.03142	4.11309	5.62169	5.7191	5.50827	5.38213	6.54805	7.34478	-0.633117	0.796727
Cap-G	6.00243	6.22501	4.77382	2.68702	2.27511	2.37827	2.35994	3.87869	3.8862	4.80806	3.94928	3.47107	3.25333	4.18202	5.13871	-0.863716	0.956687
AGO3	4.87571	3.68753	2.49866	1.45605	0.327264	0.569024	0.386952	0.694237	1.2178	1.56041	1.67394	1.4012	0.928841	1.32771	4.95034	0.0746264	3.62263	maternally loaded
CG42388	5.64496	2.53073	3.88808	2.4432	2.0201	2.24345	2.39237	2.87307	3.61704	2.5152	3.75855	3.70292	3.71518	3.02681	4.8622	-0.782761	1.83538
wech	7.24964	7.48346	6.07665	4.67716	3.23845	2.06883	1.57264	2.77984	3.15	3.5251	3.11702	2.08244	2.11535	2.51928	6.12119	-1.12844	3.60191	maternally loaded
CG6967	5.66475	0.975735	0.215844	0.37136	0.226636	0.127317	0.0208722	0.236208	0.786599	0.567753	0.399285	0.42727	0.642936	0.870105	5.22652	-0.438229	4.35642	maternally loaded
kon	0.155476	2.5175	3.82353	2.70902	1.79772	1.79146	1.42207	2.04779	2.90481	3.46124	3.34701	3.03577	2.20785	1.66904	0.727494	0.572018	-0.941546
CG13742	3.2953	3.78606	1.93916	0.867614	0.750907	1.04875	1.27479	1.57962	1.90939	1.5735	0.756553	0.283707	0.475307	1.02355	2.90231	-0.392981	1.87877
CG30007	3.57114	3.98671	1.86525	1.36605	1.48925	1.46163	1.12185	2.3467	2.93737	3.28127	3.0741	2.64729	1.74399	2.89304	3.20647	-0.364665	0.313433
CG32767	5.78979	4.57034	3.97858	3.68404	3.20973	2.19805	2.26525	3.27602	3.48125	3.93263	3.46497	2.79596	3.05558	3.72911	5.00011	-0.789685	1.27099
l(1)G0222	6.93542	6.18661	5.22953	3.87682	3.68257	3.23036	3.24783	4.86313	4.37491	4.92951	4.38205	3.44149	3.44053	3.84937	5.86453	-1.07088	2.01516	maternally loaded
KP78a	2.54507	6.99161	5.31981	2.62937	1.05418	0.93431	1.28927	3.05661	3.26888	4.87539	2.94674	1.66537	1.47479	1.20052	0.221058	-2.32402	-0.979459
smid	6.79309	6.97646	5.68703	4.18327	4.51294	4.55673	4.28865	4.86951	5.02851	5.28219	4.51456	3.74745	3.46611	3.98954	6.30996	-0.48313	2.32042	not in e02
CG14414	5.15697	5.37983	5.328	4.14897	4.02075	3.70698	3.38421	4.28093	4.45343	5.04962	4.49948	3.97413	3.81526	4.48766	4.40466	-0.752309	-0.0829999
GIIIspla2	5.71206	2.15388	3.30081	3.2065	4.89198	4.22048	4.32175	5.55855	4.46201	4.20653	4.17603	3.49549	5.53679	4.35502	4.80896	-0.9031	0.453945
gpp	5.75967	5.06921	4.94547	4.7057	3.49657	2.85365	2.47239	4.00285	4.07369	4.94383	4.69905	4.20926	4.72759	4.91978	5.34398	-0.415691	0.424194
d	1.10617	5.52247	5.55456	3.65691	2.0512	2.11161	2.19177	4.38018	4.73356	6.23752	5.28634	3.25213	2.63084	1.56289	0.2233	-0.882869	-1.33959
pros	1.18942	5.12423	4.80341	3.63013	2.87575	1.86287	1.63055	3.86066	3.56294	3.53442	3.22044	2.27224	2.27425	3.26115	0.873637	-0.315783	-2.38751
vas	7.23624	1.92527	2.23648	1.31591	1.5243	1.39443	1.69986	1.24647	1.39865	1.88348	1.93906	1.75059	2.58706	2.4184	7.21773	-0.0185091	4.79933	maternally loaded
pyd	6.32923	7.36217	6.22209	5.70732	4.45987	4.39546	4.08286	5.22005	5.52475	6.74277	6.75169	5.8285	5.33638	5.24346	5.75631	-0.572922	0.512844
nbs	4.51695	4.18222	2.25026	1.78669	2.36839	2.11566	2.00814	2.62984	2.90225	3.71769	3.52238	2.7985	2.46256	3.19671	4.5804	0.0634504	1.3837
CG14446	4.52673	4.31272	3.55585	4.35691	3.97345	2.62746	1.88405	2.96915	3.12977	4.19941	3.97242	3.61465	2.62181	3.11684	4.07329	-0.453443	0.95645
Su(var)3-9	7.41399	7.93269	8.19113	6.35726	7.67231	7.41452	7.0182	6.36553	6.35957	6.42916	6.182	5.62504	5.7191	5.78162	7.3344	-0.0795892	1.55278
CG18586	4.85938	0.516761	0.131472	0.122151	0.0361601	0.0193051	0.020677	0.0188099	0.0233006	0.0296698	0.0226025	0.0917479	0.262627	0.0265019	4.36171	-0.497671	4.33521	maternally loaded
cmet	4.24461	4.33014	2.1518	0.657936	0.230616	0.712568	0.986413	2.64703	2.7241	3.4716	2.8291	2.29487	1.47181	2.91978	3.87364	-0.370969	0.953859
CG7518	5.63321	4.86179	4.12693	3.35837	3.51279	3.12035	3.15885	4.16756	4.16103	4.82895	4.78219	3.57573	3.45468	3.89511	5.03327	-0.59994	1.13816
sno	4.59602	4.78377	3.7162	3.42593	3.62266	2.64444	2.37608	3.39037	3.91133	4.7651	4.46519	3.97122	3.65488	4.71401	4.05051	-0.545512	-0.663501
