# Supplementary material for: The developmental proteome of Drosophila melanogaster
Source: HighWire-hosted journal article supplement (doi:10.1101/gr.213694.116), 2017-04-05
Supplement: Supplemental_Tables.zip [file Supplemental_Table_S9.xlsx]

## Sheet: Sheet1
Protein.IDs	Majority.protein.IDs	Fasta.headers	Sequence.lengths	LFQ.intensity.e02_1	LFQ.intensity.e02_2	LFQ.intensity.e02_3	LFQ.intensity.e02_4	LFQ.intensity.e06_1	LFQ.intensity.e06_2	LFQ.intensity.e06_3	LFQ.intensity.e06_4	LFQ.intensity.e12_1	LFQ.intensity.e12_2	LFQ.intensity.e12_3	LFQ.intensity.e12_4	LFQ.intensity.e20_1	LFQ.intensity.e20_2	LFQ.intensity.e20_3	LFQ.intensity.e20_4	LFQ.intensity.L1_1	LFQ.intensity.L1_2	LFQ.intensity.L1_3	LFQ.intensity.L1_4	LFQ.intensity.L2_1	LFQ.intensity.L2_2	LFQ.intensity.L2_3	LFQ.intensity.L2_4	LFQ.intensity.L3_1	LFQ.intensity.L3_2	LFQ.intensity.L3_3	LFQ.intensity.L3_4	LFQ.intensity.L3c_1	LFQ.intensity.L3c_2	LFQ.intensity.L3c_3	LFQ.intensity.L3c_4	LFQ.intensity.p1_1	LFQ.intensity.p1_2	LFQ.intensity.p1_3	LFQ.intensity.p1_4	LFQ.intensity.p2_1	LFQ.intensity.p2_2	LFQ.intensity.p2_3	LFQ.intensity.p2_4	LFQ.intensity.p3_1	LFQ.intensity.p3_2	LFQ.intensity.p3_3	LFQ.intensity.p3_4	LFQ.intensity.p4_1	LFQ.intensity.p4_2
FBtr0303456:True:424	FBtr0303456:True:424	>FBtr0303456:True:424	92	0	0	0	0	0	0	0	0	0	0	0	0	0	0	0	0	0	0	0	0	0	0	17357000	0	0	0	0	0	0	0	0	0	0	0	0	0	0	0	0	0	0	0	0	0	0	0
FBtr0333725:True:13286;FBtr0333724:True:2042;FBtr0306918:True:13321	FBtr0333725:True:13286;FBtr0333724:True:2042;FBtr0306918:True:13321	>FBtr0333725:True:13286;>FBtr0333724:True:2042;>FBtr0306918:True:13321	42;42;42	0	0	0	0	0	0	0	0	0	0	0	0	0	0	0	0	0	0	0	0	0	0	0	0	0	0	39321000	0	0	0	0	0	0	0	0	0	0	0	0	0	0	0	0	0	0	0
FBtr0308778:True:1440	FBtr0308778:True:1440	>FBtr0308778:True:1440	26	0	0	0	0	0	0	0	0	0	0	0	0	0	0	0	0	0	0	0	0	0	78077000	65103000	0	0	0	0	0	0	0	0	0	0	0	0	0	0	0	0	0	0	0	0	0	0	0
FBtr0308921:True:337	FBtr0308921:True:337	>FBtr0308921:True:337	14	0	0	0	0	0	0	0	0	0	0	0	0	0	0	0	0	0	0	0	0	0	0	0	0	0	0	0	0	0	0	0	0	0	0	0	0	0	0	0	0	0	0	0	0	0	0
FBtr0309067:True:2	FBtr0309067:True:2	>FBtr0309067:True:2	17	0	0	0	0	0	0	0	0	0	0	0	0	0	0	0	0	0	0	0	0	0	0	0	0	0	0	0	0	0	0	0	0	0	0	0	0	0	0	0	0	0	0	0	0	0	0
FBtr0309291:True:870	FBtr0309291:True:870	>FBtr0309291:True:870	95	0	0	0	0	0	0	0	0	0	0	0	0	0	0	0	0	0	0	0	0	0	0	0	0	0	0	0	0	0	0	0	0	0	0	0	0	0	0	0	0	0	0	0	0	0	0
FBtr0309309:True:2693	FBtr0309309:True:2693	>FBtr0309309:True:2693	29	80973000	167460000	411700000	501050000	707810000	329940000	515380000	438340000	344510000	221360000	142090000	341080000	115900000	188020000	174080000	750980000	81709000	293330000	316450000	447060000	477380000	561080000	470150000	475900000	89389000	249570000	520950000	0	39247000	178310000	98704000	67826000	0	0	0	0	0	0	0	0	0	0	0	0	0	0
FBtr0344727:True:576;FBtr0309982:True:826	FBtr0344727:True:576;FBtr0309982:True:826	>FBtr0344727:True:576;>FBtr0309982:True:826	74;74	0	0	0	0	10616000	0	0	0	0	0	0	0	0	0	0	0	0	0	0	0	0	0	0	0	0	0	0	0	0	0	0	0	0	0	0	0	0	0	0	0	0	0	0	0	0	0
FBtr0346597:True:2;FBtr0333130:True:2	FBtr0346597:True:2;FBtr0333130:True:2	>FBtr0346597:True:2;>FBtr0333130:True:2	66;66	0	0	0	0	0	0	0	0	0	0	0	0	0	0	0	0	0	0	0	0	0	0	0	0	0	0	0	0	0	0	0	0	0	0	0	0	0	0	0	0	0	0	0	0	0	0
FBtr0335442:True:574	FBtr0335442:True:574	>FBtr0335442:True:574	63	0	0	0	0	0	0	0	0	0	0	0	0	0	0	0	0	0	0	0	0	0	0	0	0	0	0	0	0	0	0	0	0	0	0	0	0	0	0	0	0	0	0	0	0	0	0
FBtr0340701:True:264	FBtr0340701:True:264	>FBtr0340701:True:264	42	123270000	109740000	72670000	97028000	71066000	116610000	129030000	0	97018000	92853000	0	0	231930000	87920000	107740000	122990000	308690000	342180000	184580000	251160000	278930000	340960000	284480000	203610000	481430000	349400000	322970000	282980000	738270000	353840000	405200000	544200000	614110000	0	0	586430000	493440000	558790000	459480000	309870000	346260000	490270000	277570000	453770000	226280000	0
FBtr0343003:True:0	FBtr0343003:True:0	>FBtr0343003:True:0	81	0	0	0	0	0	0	0	0	0	0	0	0	0	0	0	0	0	0	0	0	0	0	0	0	0	0	0	0	0	0	0	0	0	0	0	0	0	0	0	0	0	0	0	0	0	0
FBtr0343820:True:338	FBtr0343820:True:338	>FBtr0343820:True:338	46	0	0	0	0	0	0	0	0	0	0	0	0	0	0	0	0	0	0	0	0	0	0	0	0	0	0	0	0	0	0	0	0	0	0	0	0	0	0	0	0	0	0	0	0	0	0
FBtr0343910:True:1255	FBtr0343910:True:1255	>FBtr0343910:True:1255	19	0	0	0	0	0	0	0	0	0	0	0	0	0	0	0	0	0	0	0	0	0	0	0	0	0	0	0	0	0	0	0	0	0	0	0	0	0	0	0	0	0	0	0	0	0	0
FBtr0343974:True:1890	FBtr0343974:True:1890	>FBtr0343974:True:1890	44	0	0	0	0	0	36709000	0	0	0	0	0	0	0	0	0	0	0	0	0	0	0	0	0	0	0	0	0	0	0	0	0	0	0	0	0	0	0	0	0	0	0	0	0	0	0	0
FBtr0343974:True:904	FBtr0343974:True:904	>FBtr0343974:True:904	145	0	0	0	0	0	0	0	0	0	0	0	0	0	0	0	0	0	0	0	0	0	0	0	0	0	0	0	0	0	0	0	0	0	0	0	0	0	0	0	0	0	0	0	0	0	0
FBtr0344576:True:1640	FBtr0344576:True:1640	>FBtr0344576:True:1640	44	0	0	0	0	0	0	0	0	0	0	0	0	0	0	0	0	0	0	0	0	0	0	0	0	0	0	0	0	0	17122000	0	0	0	0	0	0	0	0	0	0	0	0	0	0	0	0
FBtr0344581:True:276	FBtr0344581:True:276	>FBtr0344581:True:276	52	0	0	0	0	0	0	0	0	0	0	0	0	0	0	0	0	0	0	0	0	0	0	0	0	0	0	0	0	0	0	0	25138000	0	0	0	0	0	0	0	0	0	0	0	0	0	0
FBtr0344585:True:444	FBtr0344585:True:444	>FBtr0344585:True:444	214	0	0	0	0	0	0	0	0	0	0	0	0	0	0	0	0	0	0	0	0	0	0	0	0	0	0	0	0	0	0	0	0	0	0	0	0	0	0	0	0	0	0	0	0	0	0
FBtr0344731:True:167	FBtr0344731:True:167	>FBtr0344731:True:167	23	0	0	0	0	0	0	0	0	0	0	0	0	0	0	0	0	0	0	0	0	0	0	0	0	0	0	0	0	0	0	0	0	0	91358000	0	0	122750000	0	0	0	0	0	21076000	45540000	0	0
FBtr0345372:True:47	FBtr0345372:True:47	>FBtr0345372:True:47	31	0	0	0	0	0	0	0	0	0	0	0	0	0	0	0	0	0	0	0	0	0	0	0	0	0	0	0	0	0	0	0	0	0	0	0	0	0	0	0	0	0	0	0	0	0	0
FBtr0345414:True:301	FBtr0345414:True:301	>FBtr0345414:True:301	67	0	0	0	0	0	0	0	0	0	0	0	0	0	0	0	0	0	0	0	0	0	0	0	0	0	0	0	0	0	0	0	0	0	0	0	0	0	0	0	0	0	0	0	0	0	0
FBtr0345882:True:104	FBtr0345882:True:104	>FBtr0345882:True:104	15	0	0	0	0	0	0	0	0	0	0	0	0	0	0	0	44892000	0	0	0	0	0	0	0	0	0	0	0	0	0	0	0	0	0	0	0	0	0	0	0	0	0	0	0	0	0	0
FBtr0346251:True:526	FBtr0346251:True:526	>FBtr0346251:True:526	95	0	0	0	0	0	0	0	0	0	0	0	0	0	0	0	0	0	0	0	0	0	0	0	0	0	0	0	0	0	0	0	0	0	0	0	0	0	0	0	0	0	0	0	0	0	0
FBtr0346595:True:161	FBtr0346595:True:161	>FBtr0346595:True:161	45	0	0	0	0	0	0	0	0	0	0	0	0	0	0	0	0	0	0	0	0	0	0	0	0	0	0	0	38395000	0	0	0	0	0	0	0	0	0	0	0	0	0	0	0	0	0	0
FBtr0346840:True:0	FBtr0346840:True:0	>FBtr0346840:True:0	31	0	0	0	0	0	0	0	0	0	0	0	0	0	0	0	0	0	0	0	0	0	0	0	0	0	0	0	0	0	0	92550000	0	0	0	0	0	0	0	0	0	0	0	0	0	0	0
FBtr0347021:True:273	FBtr0347021:True:273	>FBtr0347021:True:273	47	0	0	0	0	0	0	0	0	0	0	0	0	0	0	0	0	0	0	0	0	0	0	0	0	0	0	0	0	0	0	0	0	0	0	0	0	0	0	0	17686000	0	0	0	0	0	0
FBtr0347040:True:1460	FBtr0347040:True:1460	>FBtr0347040:True:1460	46	0	0	0	0	0	0	0	0	0	0	0	0	0	0	0	0	0	0	0	0	0	0	0	0	0	0	0	0	0	0	0	0	0	0	0	0	0	0	0	0	0	0	0	0	0	0
FBtr0347047:True:1576	FBtr0347047:True:1576	>FBtr0347047:True:1576	37	0	0	0	0	0	0	0	0	0	0	0	0	0	0	0	0	0	0	0	0	0	0	0	0	0	0	0	0	0	0	0	0	0	0	0	0	0	0	0	0	0	0	0	0	0	0
[truncated: 22 more columns]
