# Supplementary material for: The developmental proteome of Drosophila melanogaster
Source: HighWire-hosted journal article supplement (doi:10.1101/gr.213694.116), 2017-04-05
Supplement: Supplemental_Tables.zip [file Supplemental_Table_S10.xlsx]

## Sheet: Sheet1
filtered	Protein.IDs	Majority.protein.IDs	Fasta.headers	Sequence.lengths	LFQ.intensity.e02_1	LFQ.intensity.e02_2	LFQ.intensity.e02_3	LFQ.intensity.e02_4	LFQ.intensity.e06_1	LFQ.intensity.e06_2	LFQ.intensity.e06_3	LFQ.intensity.e06_4	LFQ.intensity.e12_1	LFQ.intensity.e12_2	LFQ.intensity.e12_3	LFQ.intensity.e12_4	LFQ.intensity.e20_1	LFQ.intensity.e20_2	LFQ.intensity.e20_3	LFQ.intensity.e20_4	LFQ.intensity.L1_1	LFQ.intensity.L1_2	LFQ.intensity.L1_3	LFQ.intensity.L1_4	LFQ.intensity.L2_1	LFQ.intensity.L2_2	LFQ.intensity.L2_3	LFQ.intensity.L2_4	LFQ.intensity.L3_1	LFQ.intensity.L3_2	LFQ.intensity.L3_3	LFQ.intensity.L3_4	LFQ.intensity.L3c_1	LFQ.intensity.L3c_2	LFQ.intensity.L3c_3	LFQ.intensity.L3c_4	LFQ.intensity.p1_1	LFQ.intensity.p1_2	LFQ.intensity.p1_3	LFQ.intensity.p1_4	LFQ.intensity.p2_1	LFQ.intensity.p2_2	LFQ.intensity.p2_3	LFQ.intensity.p2_4	LFQ.intensity.p3_1	LFQ.intensity.p3_2	LFQ.intensity.p3_3	LFQ.intensity.p3_4	LFQ.intensity.p4_1
TRUE	FBtr0339441:True:1067;FBtr0301337:True:1171;FBtr0070095:True:1221	FBtr0339441:True:1067;FBtr0301337:True:1171;FBtr0070095:True:1221	>FBtr0339441:True:1067;>FBtr0301337:True:1171;>FBtr0070095:True:1221	96;96;96	0	0	0	0	0	0	0	0	0	0	0	0	0	0	0	0	0	0	0	0	0	0	0	0	0	0	0	0	0	0	0	0	0	0	0	0	0	0	0	0	21958000	0	0	0	0
FALSE	FBtr0082602:True:9	FBtr0082602:True:9	>FBtr0082602:True:9	448	0	0	0	0	0	0	0	0	0	0	0	0	0	0	0	0	0	82712000	54373000	78245000	66242000	46751000	49405000	0	0	0	0	0	0	0	0	0	32726000	0	0	0	0	0	0	0	0	0	0	0	0
TRUE	FBtr0091689:True:0	FBtr0091689:True:0	>FBtr0091689:True:0	104	0	0	0	0	0	0	0	0	0	0	0	0	0	0	0	0	0	0	0	0	0	0	0	0	0	0	0	0	36456000	0	0	0	0	0	0	0	0	0	0	0	0	0	0	0	0
TRUE	FBtr0114242:True:7	FBtr0114242:True:7	>FBtr0114242:True:7	329	0	0	0	0	0	0	0	0	0	0	0	0	0	0	0	0	0	0	0	0	0	0	0	0	0	0	0	0	0	0	0	0	0	0	0	0	0	0	0	0	0	0	0	0	0
TRUE	FBtr0114264:True:0	FBtr0114264:True:0	>FBtr0114264:True:0	210	0	0	0	0	0	0	0	0	0	0	0	0	0	0	0	0	0	0	0	0	0	0	0	0	0	0	0	0	0	0	0	0	0	0	0	0	0	0	0	0	0	0	0	0	0
TRUE	FBtr0300631:True:123;FBtr0310082:True:2	FBtr0300631:True:123;FBtr0310082:True:2	>FBtr0300631:True:123;>FBtr0310082:True:2	235;259	0	0	0	0	0	0	0	0	0	0	0	0	0	0	0	0	0	0	0	0	0	0	0	0	0	0	0	0	0	0	21199000	0	0	0	0	0	0	0	0	0	0	0	0	0	0
FALSE	FBtr0302232:True:77	FBtr0302232:True:77	>FBtr0302232:True:77	35	0	0	0	0	0	0	0	0	0	0	0	0	0	0	0	0	0	0	0	0	0	0	0	0	0	0	0	0	0	0	0	14157000	0	0	0	0	0	0	0	0	0	0	0	0	0
TRUE	FBtr0302346:True:181	FBtr0302346:True:181	>FBtr0302346:True:181	186	0	0	0	0	0	0	0	0	0	0	0	0	0	0	0	0	0	0	0	0	0	0	0	26028000	0	0	0	0	0	0	0	0	0	0	0	0	0	0	0	0	0	0	0	0	0
TRUE	FBtr0339151:True:0	FBtr0339151:True:0	>FBtr0339151:True:0	445	0	0	0	0	0	0	0	0	0	0	0	0	0	0	0	0	0	0	0	0	0	0	0	0	0	0	0	0	0	0	0	0	0	0	0	0	0	0	0	0	0	0	0	0	0
[truncated: 23 more columns]
