# Supplementary material for: The developmental proteome of Drosophila melanogaster
Source: HighWire-hosted journal article supplement (doi:10.1101/gr.213694.116), 2017-04-05
Supplement: Supplemental_Tables.zip [file Supplemental_Table_S12.xlsx]

## Sheet: timecourse_ARIMA_apclusters_gen
gene	cluster	flybase_gene
FBtr0070173	1	CG3021
FBtr0070875;FBtr0070874	1	Efr
FBtr0071129	1	l(1)G0193
FBtr0071993;FBtr0310325	1	CG3831
FBtr0072913	1	CG15820
FBtr0075159;FBtr0273277	1	CG5535
FBtr0076001;FBtr0333381	1	CAH2
FBtr0077065	1	CG13295
FBtr0077670	1	alpha4GT1
FBtr0080777;FBtr0080776;FBtr0080775;FBtr0080774;FBtr0080773;FBtr0305561	1	CycE
FBtr0081816	1	CG11035
FBtr0340068;FBtr0340067;FBtr0087114;FBtr0087115	1	Picot
FBtr0087453;FBtr0339984	1	Cyp6a19
FBtr0088932;FBtr0331966;FBtr0088934;FBtr0088933	1	CG30497
FBtr0339117;FBtr0088938	1	tor
FBtr0310315;FBtr0310314;FBtr0299951;FBtr0299950;FBtr0299949;FBtr0310316	1	CG42354
FBtr0331562;FBtr0300903	1	CG18586
FBtr0306138;FBtr0080197	1	l(2)gd1
FBtr0070586;FBtr0333793;FBtr0070587	2	CG2875
FBtr0334881;FBtr0309875;FBtr0309874;FBtr0309873;FBtr0071037;FBtr0071036	2	ogre
FBtr0071114;FBtr0071113;FBtr0071112	2	UbcE2H
FBtr0071194	2	CG2260
FBtr0071250	2	CG1785
FBtr0342985;FBtr0342986;FBtr0071815;FBtr0071814;FBtr0071813;FBtr0071816	2	Gp150
FBtr0072576	2	CG32344
FBtr0073205	2	dib
FBtr0073820	2	Rtc1
FBtr0074652;FBtr0342879;FBtr0342880	2	CG7358
FBtr0345918;FBtr0074733;FBtr0074734;FBtr0307161	2	CG14207
FBtr0333607;FBtr0075325;FBtr0075324	2	CG9705
FBtr0345813;FBtr0075399;FBtr0075398	2	Mipp1
FBtr0075547	2	CG7275
FBtr0077030	2	CG32409
FBtr0079044;FBtr0079041	2	Rtnl1
FBtr0100381;FBtr0079383;FBtr0079382	2	nrv2
FBtr0343721;FBtr0080769;FBtr0080768;FBtr0080767;FBtr0080765	2	Gli
FBtr0080957	2	CG12288
FBtr0081599	2	CG1234
FBtr0082403	2	RpL24-like
FBtr0303228;FBtr0085830;FBtr0085828;FBtr0085826	2	ttk
FBtr0085831	2	CG11563
FBtr0330057;FBtr0086512;FBtr0330058	2	rib
FBtr0087455	2	Cyp6a8
FBtr0305186;FBtr0307087;FBtr0110877;FBtr0110876;FBtr0330170;FBtr0307086;FBtr0307083;FBtr0307085;FBtr0307082;FBtr0082533	2	l(3)neo38
FBtr0300539;FBtr0300538;FBtr0299706;FBtr0345791;FBtr0299705;FBtr0306625;FBtr0300541;FBtr0299707	2	grh
FBtr0070681	3	pon
FBtr0070542	4	Fcp3C
FBtr0070721	4	CG6927
FBtr0070866;FBtr0343294	4	CG5966
FBtr0070922	4	swa
FBtr0071201	4	Cp7Fb
FBtr0342742;FBtr0342743;FBtr0073573	4	wisp
FBtr0332710;FBtr0332709;FBtr0076050;FBtr0076049	4	CG6928
FBtr0076429	4	CG4476
FBtr0335159;FBtr0077751	4	CG4267
FBtr0078557;FBtr0078556;FBtr0078555	4	slif
FBtr0079549	4	Spn28Dc
FBtr0080062	4	l(2)SH0834
FBtr0332520;FBtr0111015;FBtr0111014;FBtr0080676;FBtr0332521	4	mol
FBtr0337051;FBtr0082240	4	CG6293
FBtr0306235;FBtr0085956;FBtr0085957;FBtr0306236;FBtr0085958	4	CG17018
FBtr0339121;FBtr0088844	4	CG30377
FBtr0089023	4	Tsp42Ef
FBtr0310330;FBtr0100329;FBtr0310329;FBtr0310328;FBtr0290120	4	CG9850
FBtr0100866	4	mt:ATPase8
FBtr0100870	4	mt:ND3
FBtr0329980;FBtr0112617;FBtr0329979	4	CG34380
FBtr0300278	4	CG7091
FBtr0332705;FBtr0301438	4	CG42575
FBtr0337062;FBtr0305130	4	CG4009
FBtr0332636;FBtr0332641;FBtr0332637;FBtr0332642	4	tral
FBtr0336479;FBtr0336476;FBtr0336475;FBtr0336474;FBtr0336473;FBtr0336478;FBtr0336477	4	Irk1
FBtr0340204;FBtr0340206;FBtr0340205;FBtr0340203	4	yin
FBtr0071116	5	CG2254
FBtr0071486	5	CG2962
FBtr0072954;FBtr0072953;FBtr0072952;FBtr0072951	5	Pxn
FBtr0331289;FBtr0077982;FBtr0077981	5	CG5080
FBtr0078975	5	TwdlF
FBtr0081427;FBtr0307498	5	CG9336
FBtr0082568	5	CG4115
FBtr0087534;FBtr0087533;FBtr0087532	5	CG8468
FBtr0345371;FBtr0087792	5	CG13321
FBtr0345994;FBtr0345993;FBtr0340057;FBtr0340056;FBtr0100136;FBtr0100135	5	tyn
FBtr0300961;FBtr0085780;FBtr0085779;FBtr0344066;FBtr0300960	5	mesh
FBtr0070473;FBtr0070472;FBtr0070470;FBtr0070469;FBtr0070468;FBtr0070466;FBtr0070474;FBtr0070467;FBtr0070475;FBtr0331753;FBtr0112828;FBtr0301966;FBtr0070476;FBtr0302185	6	sgg
FBtr0071306	6	CG12106
FBtr0072908;FBtr0072906;FBtr0072907;FBtr0072905	6	CG1275
FBtr0073541	6	Kmn1
FBtr0074020	6	CG9114
FBtr0077319	6	Tak1
FBtr0078255;FBtr0321284	6	Spc105R
FBtr0079029	6	CG14036
FBtr0332008;FBtr0079674	6	fu2
FBtr0080761;FBtr0305560	6	CG3793
FBtr0081414	6	Pomp
FBtr0345178;FBtr0082063	6	JHDM2
FBtr0085590;FBtr0085589	6	spn-A
FBtr0086899	6	CG30105
FBtr0087157	6	CG4398
FBtr0087891	6	Ak6
FBtr0339393;FBtr0088542	6	CG1868
FBtr0089745;FBtr0089743;FBtr0089744	6	didum
FBtr0112407	6	CG34214
FBtr0306620;FBtr0306619;FBtr0100040;FBtr0100039;FBtr0306624;FBtr0100042;FBtr0100041;FBtr0307191;FBtr0100044;FBtr0100043;FBtr0306623;FBtr0306622	6	nuf
FBtr0345109;FBtr0345111;FBtr0345110;FBtr0345100;FBtr0345093;FBtr0345102;FBtr0345099;FBtr0345088;FBtr0345087;FBtr0345092;FBtr0345094;FBtr0345103;FBtr0345085	6	CG45186
FBtr0071519	7	Act57B
FBtr0070207	8	fs(1)N
FBtr0071091	8	CG1444
FBtr0071203	8	Cp36
FBtr0071607	8	Acox57D-d
FBtr0072706	8	cue
FBtr0076325;FBtr0076324;FBtr0076320;FBtr0076318;FBtr0076317;FBtr0076321;FBtr0076319;FBtr0331848;FBtr0076322;FBtr0076326;FBtr0076323;FBtr0076327	8	CG8177
FBtr0332370;FBtr0079384	8	nrv1
FBtr0345203;FBtr0334868;FBtr0085400;FBtr0085399;FBtr0085398	8	SP1029
FBtr0332472;FBtr0304854	8	vas
FBtr0305178	8	clos
FBtr0070038	9	alpha-Cat
FBtr0070783;FBtr0308579	9	Mlc-c
FBtr0071119;FBtr0333307;FBtr0333308;FBtr0301309;FBtr0071122;FBtr0071121;FBtr0071120;FBtr0071118;FBtr0333309	9	fs(1)h
FBtr0071300	9	dalao
FBtr0072037	9	vir
FBtr0073242	9	CG11583
FBtr0340049;FBtr0073453;FBtr0340050	9	CG1737
FBtr0333262;FBtr0073486;FBtr0308088;FBtr0333261;FBtr0301289;FBtr0073487;FBtr0073485;FBtr0308089;FBtr0073489;FBtr0330390;FBtr0112812;FBtr0073490;FBtr0112813;FBtr0073488;FBtr0301288	9	dlg1
FBtr0340191;FBtr0073848	9	CG2691
FBtr0074138	9	CG8939
FBtr0074659;FBtr0074658;FBtr0074657;FBtr0074656	9	bnb
FBtr0075564	9	CG12301
FBtr0076207	9	CG7839
FBtr0076938	9	sgl
FBtr0077198	9	Sep1
FBtr0335125;FBtr0307080;FBtr0077714;FBtr0077713	9	Bacc
FBtr0301198;FBtr0301197;FBtr0078366;FBtr0078365;FBtr0078364;FBtr0078363;FBtr0078362;FBtr0078361;FBtr0078359	9	CG7611
FBtr0345336;FBtr0307071;FBtr0307070;FBtr0307069;FBtr0079232;FBtr0079231	9	lid
FBtr0079840;FBtr0079839	9	Trx-2
FBtr0079848	9	CG4364
FBtr0346426;FBtr0113037;FBtr0080296	9	RpL7-like
FBtr0080465	9	CG6523
FBtr0080466	9	Tap42
FBtr0080591	9	CG4500
FBtr0081472	9	CG9246
FBtr0081620;FBtr0081619;FBtr0081618	9	Ama
FBtr0081947	9	M1BP
FBtr0082736;FBtr0301657	9	Su(var)3-7
FBtr0083275	9	Mat89Ba
FBtr0346345;FBtr0084175;FBtr0084174	9	pit
FBtr0084494	9	CG5854
FBtr0084740	9	polybromo
FBtr0345207;FBtr0330306;FBtr0085350	9	Inx3
FBtr0085839;FBtr0085841;FBtr0085840	9	CG1910
FBtr0086092;FBtr0086091	9	CG10417
FBtr0086601	9	prod
FBtr0087934	9	CG8545
FBtr0345018;FBtr0304964;FBtr0304963;FBtr0088002;FBtr0088001	9	Cam
FBtr0345935;FBtr0088788	9	Rs1
FBtr0089550	9	CG5033
FBtr0089640;FBtr0089636	9	Caper
FBtr0089942	9	scf
FBtr0343571;FBtr0290069;FBtr0074276	9	hang
FBtr0290134	9	CG42232
FBtr0070256;FBtr0070255	10	pck
FBtr0340091;FBtr0070440;FBtr0070439	10	egh
FBtr0071489;FBtr0308583;FBtr0308584;FBtr0308582	10	ZAP3
FBtr0343432;FBtr0072253	10	Zfrp8
FBtr0346618;FBtr0073766	10	CG15747
FBtr0331722;FBtr0073807;FBtr0340395;FBtr0308644	10	Tango2
FBtr0346119;FBtr0340399;FBtr0073846	10	CG12177
FBtr0074060;FBtr0308614	10	CG9240
FBtr0075337	10	CG9951
FBtr0334053;FBtr0075776;FBtr0114573;FBtr0075775	10	CG32138
FBtr0077435	10	Dim1
FBtr0334951;FBtr0078728;FBtr0334952	10	Xe7
FBtr0078767	10	Hdac3
FBtr0344023;FBtr0081093;FBtr0081092	10	CG31751
FBtr0343118;FBtr0081130	10	msl-1
FBtr0081953	10	CG9773
FBtr0335433;FBtr0082555	10	CG3313
FBtr0082690	10	Spc25
FBtr0084387	10	wda
FBtr0084406	10	CG31365
FBtr0085528;FBtr0339144	10	Atg16
FBtr0086037	10	kune
FBtr0342667;FBtr0305677;FBtr0305676;FBtr0086340	10	CG8654
FBtr0086733	10	Spn55B
FBtr0330619;FBtr0088100;FBtr0088099;FBtr0088098;FBtr0088101;FBtr0330620	10	shn
FBtr0339475;FBtr0088245	10	CG7686
FBtr0113215	10	CG14688
FBtr0070150	11	CG13362
FBtr0070186	11	CG3699
FBtr0070612	11	CG15239
FBtr0071215;FBtr0071214;FBtr0300751;FBtr0300750;FBtr0071217;FBtr0071216	11	CG12065
FBtr0343508;FBtr0343507;FBtr0072402;FBtr0072400;FBtr0072401	11	emp
FBtr0072673;FBtr0072672;FBtr0072675;FBtr0072674	11	Myo61F
FBtr0308314;FBtr0073053	11	CG12009
FBtr0073124	11	Cht7
FBtr0073141	11	ImpE2
FBtr0073223	11	Cpr64Ad
FBtr0074026;FBtr0340410;FBtr0330402;FBtr0112984	11	CG9095
FBtr0336897;FBtr0336896;FBtr0336895;FBtr0074520;FBtr0308237;FBtr0074526;FBtr0074525;FBtr0074523;FBtr0074522;FBtr0074521;FBtr0308236	11	wupA
FBtr0333862;FBtr0074953	11	serp
FBtr0113174;FBtr0075305;FBtr0075300;FBtr0305577	11	CG11905
FBtr0075409	11	dsx-c73A
FBtr0301405;FBtr0075842;FBtr0075843	11	ImpL1
FBtr0075844	11	CG14110
FBtr0077496;FBtr0307052;FBtr0307051	11	CG3921
FBtr0077958	11	MFS3
FBtr0078396;FBtr0331821	11	CG5656
FBtr0078597	11	Osi7
FBtr0344063;FBtr0305574;FBtr0079551	11	CG7227
FBtr0345747;FBtr0080926;FBtr0332333;FBtr0332334;FBtr0080927	11	CG13284
FBtr0343824;FBtr0081069	11	CG10211
FBtr0333009;FBtr0081428	11	CG9338
FBtr0083442	11	CG5873
FBtr0334309;FBtr0085094	11	BM-40-SPARC
FBtr0085545	11	CG7896
FBtr0086173;FBtr0086172;FBtr0086171	11	Tsp42Ea
FBtr0087824	11	Cyp301a1
FBtr0087912	11	CG13159
FBtr0339403;FBtr0088493;FBtr0088494	11	CG1648
FBtr0088638;FBtr0308083;FBtr0304569;FBtr0304570;FBtr0088640;FBtr0088639;FBtr0088637;FBtr0304571;FBtr0304572;FBtr0304568	11	RyR
FBtr0089747	11	Mlc2
FBtr0113240;FBtr0334631;FBtr0113239	11	CG6118
FBtr0344996;FBtr0299696;FBtr0343338;FBtr0299697	11	Mlp60A
FBtr0300876;FBtr0300875	11	nyo
FBtr0303125;FBtr0303114;FBtr0303113;FBtr0303117;FBtr0303121;FBtr0303123;FBtr0303111;FBtr0303112;FBtr0334060;FBtr0303115;FBtr0344223;FBtr0303124;FBtr0344224;FBtr0344222;FBtr0303118;FBtr0303122	11	Ank2
FBtr0333337;FBtr0333340;FBtr0333345;FBtr0333344;FBtr0333342;FBtr0333343;FBtr0333341;FBtr0333338;FBtr0333339	11	Hr4
FBtr0342818;FBtr0342826;FBtr0342811;FBtr0342815;FBtr0342814;FBtr0342809;FBtr0342812;FBtr0342822;FBtr0342817;FBtr0342813;FBtr0342816;FBtr0342808;FBtr0342806;FBtr0342820;FBtr0342819;FBtr0342824;FBtr0342821;FBtr0342825;FBtr0342810;FBtr0342805;FBtr0342807;FBtr0342823	11	trol
FBtr0344437;FBtr0344438	11	Kr-h1
FBtr0070665;FBtr0343523;FBtr0336882;FBtr0336884;FBtr0343524;FBtr0070666;FBtr0070667	12	Fas2
FBtr0333522;FBtr0301764;FBtr0301762;FBtr0071209;FBtr0071207;FBtr0333523;FBtr0301763;FBtr0071208;FBtr0305914	12	Nrg
FBtr0340343;FBtr0333537;FBtr0333536;FBtr0079010;FBtr0071347;FBtr0071346;FBtr0071345	12	His3.3B;His3.3A
FBtr0072764	12	CG12011
FBtr0073004	12	CG32486
FBtr0073778	12	GstT4
FBtr0340623;FBtr0074484	12	CG8289
FBtr0074961	12	Oat
FBtr0075017	12	CG9629
FBtr0345031;FBtr0076382	12	LanB2
FBtr0077014	12	LanA
FBtr0079491;FBtr0079490	12	LanB1
FBtr0337048;FBtr0082225	12	CG3999
FBtr0086699;FBtr0113093	12	CG10924
FBtr0086906	12	Ns2
FBtr0339664;FBtr0290119;FBtr0307074;FBtr0307073;FBtr0307072;FBtr0302162	12	uif
FBtr0070369;FBtr0339494;FBtr0070370	13	CG14814
FBtr0072678	13	msd1
FBtr0307899;FBtr0300375;FBtr0073678;FBtr0307900;FBtr0307898;FBtr0340407;FBtr0340406	13	Tomosyn
FBtr0074189;FBtr0074188;FBtr0074187;FBtr0074186;FBtr0074185;FBtr0113439;FBtr0074184	13	CG8974;CG32581
FBtr0332091;FBtr0075562	13	dop
FBtr0333025;FBtr0075786;FBtr0075785	13	CG8783
FBtr0346455;FBtr0342934;FBtr0079069	13	Bub1
FBtr0344764;FBtr0079260	13	DLP
FBtr0332329;FBtr0079371	13	Wee1
FBtr0332509;FBtr0080514;FBtr0080513	13	B4
FBtr0080886;FBtr0080885;FBtr0080884;FBtr0339514;FBtr0100459	13	grp
FBtr0083478;FBtr0331348	13	ald
FBtr0334314;FBtr0334313;FBtr0083596;FBtr0083595	13	l(3)05822
FBtr0084016	13	Ubpy
FBtr0084323	13	vret
FBtr0301613;FBtr0084799;FBtr0301612;FBtr0084800	13	ssh
FBtr0339247;FBtr0084802	13	CG31108
FBtr0084835	13	Vps33B
FBtr0086302	13	CG16868
FBtr0329862;FBtr0086900	13	RhoGAP54D
FBtr0345020;FBtr0345019	13	CG1667
FBtr0074387	14	CG5010
FBtr0340368;FBtr0074622	14	Ggt-1
FBtr0082969	14	BigH1
FBtr0333605;FBtr0333604;FBtr0310067;FBtr0071267;FBtr0071266	15	e(r)
FBtr0309871;FBtr0301805;FBtr0071284	15	HP1b
FBtr0071324	15	c12.1
FBtr0071641	15	Sara
FBtr0071653;FBtr0071654	15	Egfr
FBtr0306917;FBtr0072556	15	Gale
FBtr0073777	15	CG1673
FBtr0308699;FBtr0100294;FBtr0074005;FBtr0074006	15	Top1
FBtr0075055	15	Atg3
FBtr0075161	15	CG5567
FBtr0332095;FBtr0075592;FBtr0301186;FBtr0300329	15	CG7656
FBtr0076252;FBtr0076251;FBtr0076250	15	Aps
FBtr0076654	15	GstO2
FBtr0310534;FBtr0310533;FBtr0077112	15	CG5537
FBtr0077941;FBtr0329985	15	lea
FBtr0331567;FBtr0078219;FBtr0078217;FBtr0078218;FBtr0078216	15	CG5059
FBtr0078412	15	ppl
FBtr0078561;FBtr0078563	15	Mes2
FBtr0334946;FBtr0078716	15	Atg17
FBtr0345175;FBtr0345174;FBtr0078871;FBtr0078870	15	CG1129
FBtr0333539;FBtr0301907;FBtr0301906;FBtr0301905;FBtr0079035;FBtr0079034;FBtr0079033	15	CG31650
FBtr0079226;FBtr0079225	15	CG9107
FBtr0079646	15	CSN8
FBtr0079865	15	zf30C
FBtr0080430	15	CG12404
FBtr0343667;FBtr0080553;FBtr0080552	15	Ance
FBtr0081180	15	hk
FBtr0334332;FBtr0081934	15	CG9839
FBtr0082648	15	Dtg
FBtr0082665	15	Su(fu)
FBtr0346348;FBtr0309995;FBtr0082925	15	RpII15
FBtr0083003	15	CG3817
FBtr0083009	15	CG7265
FBtr0344381;FBtr0083248;FBtr0083247;FBtr0083246;FBtr0083245	15	glob1
FBtr0305003;FBtr0083312;FBtr0330047	15	Pak3
FBtr0337016;FBtr0083314	15	CG14894
FBtr0084254	15	CG7054
FBtr0112907;FBtr0084527	15	Pli
FBtr0084633	15	Nab2
FBtr0085297	15	Gfat2
FBtr0086502	15	TBCB
FBtr0086940	15	CG4866
FBtr0087342	15	CG8207
FBtr0087676	15	link
FBtr0088105;FBtr0339479	15	CG7737
FBtr0088274	15	CG17765
FBtr0088532;FBtr0088531	15	CG1902
FBtr0089395	15	pr
FBtr0304729;FBtr0084459	15	mbc
FBtr0305297;FBtr0310205	15	pyd
FBtr0306686;FBtr0085662;FBtr0302110;FBtr0085663;FBtr0302112;FBtr0085661;FBtr0306687;FBtr0302600;FBtr0336446;FBtr0302601;FBtr0302111;FBtr0085660;FBtr0085659;FBtr0085658;FBtr0306685;FBtr0336447;FBtr0113483	15	tmod
FBtr0332632;FBtr0332631;FBtr0332630	15	CG17493
FBtr0336673;FBtr0336675;FBtr0345068;FBtr0303206;FBtr0345069;FBtr0336676;FBtr0301324;FBtr0112707	15	CG34417
FBtr0073976	16	CG12398
FBtr0075155;FBtr0075154	16	Tsp74F
FBtr0076880	16	CG14834
FBtr0077397;FBtr0336834;FBtr0077400;FBtr0077399;FBtr0077398;FBtr0077395;FBtr0345631;FBtr0077396;FBtr0336833	16	hoe1
FBtr0079857	16	Mtpalpha
FBtr0305555;FBtr0080489	16	CG16974
FBtr0083142;FBtr0083141	16	Spn88Ea
FBtr0087886;FBtr0087885;FBtr0333103	16	muskelin
FBtr0335133;FBtr0300382	16	Duox
FBtr0306111;FBtr0088553;FBtr0088552	16	wun
FBtr0075053	17	CG6885
FBtr0309231;FBtr0075240;FBtr0075239	17	Cad74A
FBtr0077341	17	CG17068
FBtr0336962;FBtr0077384	17	CG15628
FBtr0078276	17	CG11396
FBtr0080693	17	dyn-p25
FBtr0081128	17	CG10376
FBtr0082662	17	mus308
FBtr0082999	17	CG33332
FBtr0344473;FBtr0083255	17	sra
FBtr0330289;FBtr0084803;FBtr0330288	17	dan
FBtr0085537	17	CG7837
FBtr0331358;FBtr0085691	17	CG2224
FBtr0087856;FBtr0087855	17	sca
FBtr0299515	17	lqfR
FBtr0339744;FBtr0070840	18	lin-52
FBtr0071198	18	Es2
FBtr0071666	18	NC2alpha
FBtr0345381;FBtr0332668;FBtr0072834	18	CG12025
FBtr0073693	18	Brms1
FBtr0340150;FBtr0074314	18	mthl1
FBtr0333619;FBtr0333618;FBtr0333617;FBtr0075501;FBtr0075500;FBtr0075499	18	Diap1
FBtr0075558;FBtr0075557	18	CrebA
FBtr0077643	18	Bem46
FBtr0077666	18	cnir
FBtr0078277	18	CG11399
FBtr0079896;FBtr0331636	18	CG31712
FBtr0333098;FBtr0333097;FBtr0079993	18	GATAd
FBtr0332196;FBtr0332195;FBtr0080008	18	da
FBtr0342602;FBtr0080326	18	Pex19
FBtr0339712;FBtr0081763	18	CG2846
FBtr0083139	18	CG6654
FBtr0301432;FBtr0333831;FBtr0083653	18	CG31122
FBtr0084166	18	RpI12
FBtr0303480;FBtr0084711	18	CG31381
FBtr0085085;FBtr0085084	18	CG6330
FBtr0335405;FBtr0085380;FBtr0085375;FBtr0085377;FBtr0301651;FBtr0301650	18	Vha100-1
FBtr0303455;FBtr0085425	18	CG2006
FBtr0085651	18	spdo
FBtr0301862;FBtr0301861;FBtr0086658;FBtr0086657	18	SP2637
FBtr0331958;FBtr0086693	18	slim
FBtr0088243;FBtr0088242;FBtr0331938;FBtr0306393;FBtr0113356;FBtr0331939;FBtr0113357	18	CG30015
FBtr0339296;FBtr0088814;FBtr0088813;FBtr0088812;FBtr0088811	18	kermit
FBtr0088902;FBtr0088901;FBtr0088900	18	Nop17l
FBtr0300954;FBtr0339300;FBtr0100140	18	Asap
FBtr0112893;FBtr0334956;FBtr0334957;FBtr0082959;FBtr0334955	18	stumps
FBtr0301073;FBtr0110888;FBtr0335004	18	CG34133
FBtr0302084	18	lbk
FBtr0307305;FBtr0307304;FBtr0307302;FBtr0307301;FBtr0332096;FBtr0330149;FBtr0330148;FBtr0307306	18	BtbVII
FBtr0072064	19	Pi3K59F
FBtr0075057;FBtr0075056	19	HipHop
FBtr0075995	19	CG11534
FBtr0077125	19	Sse
FBtr0079424	19	Nuf2
FBtr0080229	19	CG6201
FBtr0335286;FBtr0085974	19	Tbce
FBtr0100268	19	Chrac-14
FBtr0071911;FBtr0071913;FBtr0309858;FBtr0071914	20	CycB
FBtr0074007;FBtr0330404	20	dah
FBtr0074245;FBtr0100556	20	CG32576
FBtr0346186;FBtr0340633;FBtr0100463;FBtr0074476	20	CG8188
FBtr0344324;FBtr0074682	20	out
FBtr0076647	20	Cdc6
FBtr0076729	20	RecQ4
FBtr0077080	20	QC
FBtr0331454;FBtr0331453;FBtr0079782	20	rost
FBtr0081099	20	Grip71
FBtr0083408	20	Det
FBtr0304658;FBtr0083740;FBtr0083739	20	Dl
FBtr0084692	20	asp
FBtr0085414	20	dgt6
FBtr0332255;FBtr0087649	20	S-Lap7
FBtr0089349;FBtr0089342	20	lola
FBtr0301478;FBtr0301477;FBtr0089521;FBtr0306350;FBtr0306351;FBtr0330046	20	Mvl
FBtr0309202;FBtr0084000;FBtr0083999;FBtr0083998;FBtr0344316;FBtr0309204;FBtr0309203;FBtr0309205;FBtr0344317	20	Calx
FBtr0300448;FBtr0071204	21	Cp38
FBtr0342870;FBtr0071582	21	tud
FBtr0072883	21	yellow-g2
FBtr0072902	21	yellow-g
FBtr0340358;FBtr0334461;FBtr0074385;FBtr0074384;FBtr0334460	21	CG4991
FBtr0290104;FBtr0076551;FBtr0076550;FBtr0076549;FBtr0290103	21	smg
FBtr0076573	21	Cp19
FBtr0340362;FBtr0077326	21	Obp19c
FBtr0333454;FBtr0078369	21	VhaM9.7-b
FBtr0080804;FBtr0080803;FBtr0080805	21	BicC
FBtr0336487;FBtr0083237	21	CG10407
FBtr0345392;FBtr0087359;FBtr0340003	21	CG8180
FBtr0088137;FBtr0339544;FBtr0088136;FBtr0305074	21	CG7777
FBtr0346452;FBtr0290322	21	cup
FBtr0302907;FBtr0300000;FBtr0343357;FBtr0300001;FBtr0302906;FBtr0302905	21	CG42388
FBtr0340297;FBtr0073516	22	nod
FBtr0075446	22	ms(3)72Dt
FBtr0339501;FBtr0100651;FBtr0077352;FBtr0339500;FBtr0100652;FBtr0100650;FBtr0077353;FBtr0310475	22	Cp110
FBtr0330660;FBtr0330659;FBtr0330658;FBtr0077851;FBtr0077850	22	aop
FBtr0081843	22	Atg13
FBtr0082287	22	CG4570
FBtr0082506	22	CG18547
FBtr0342603;FBtr0110911	22	Mt2
FBtr0336886;FBtr0333420;FBtr0112745;FBtr0112744	22	lmgB
FBtr0332982;FBtr0114509	22	CG11593
FBtr0343564;FBtr0070122;FBtr0308651	23	Roc1a
FBtr0333803;FBtr0070346	23	usp
FBtr0070396	23	fs(1)K10
FBtr0070499	23	CG2685
FBtr0332398;FBtr0070807	23	CG4078
FBtr0331725;FBtr0331724;FBtr0331723;FBtr0071213;FBtr0071212;FBtr0112964;FBtr0112963	23	Trf4-1
FBtr0302723;FBtr0071402;FBtr0302722;FBtr0333521	23	nej
FBtr0071602;FBtr0071603;FBtr0342890	23	dom
FBtr0071679	23	Tbp
FBtr0072236	23	Snap29
FBtr0300490;FBtr0072344	23	CG4622
FBtr0072481;FBtr0072480;FBtr0346614	23	mri
FBtr0332110;FBtr0332109;FBtr0072520;FBtr0305325;FBtr0332108	23	DIP2
FBtr0072990	23	CG16753
FBtr0073247;FBtr0073246;FBtr0073245	23	ago
FBtr0340433;FBtr0074001;FBtr0074002	23	CG5877
FBtr0074201	23	CG8944
FBtr0074230	23	sl
FBtr0074510;FBtr0339540	23	dik
FBtr0074514	23	Taf8
FBtr0332690;FBtr0074819	23	gig
FBtr0333124;FBtr0075205;FBtr0333125;FBtr0075206	23	CycT
FBtr0076051	23	CG6793
FBtr0076203	23	SuUR
FBtr0346546;FBtr0076688	23	CdsA
FBtr0077015	23	CG13298
FBtr0301537;FBtr0345015;FBtr0304906;FBtr0077320;FBtr0340405	23	RhoGAP19D
FBtr0077455	23	CG15439
FBtr0077631	23	betaggt-II
FBtr0331654;FBtr0077674;FBtr0305980	23	Chd1
FBtr0335126;FBtr0077715	23	Trn-SR
FBtr0306539;FBtr0306538;FBtr0306537;FBtr0306536;FBtr0078100	23	dbr
FBtr0078752	23	CG2926
FBtr0343687;FBtr0343686;FBtr0080724;FBtr0080723	23	ck
FBtr0321313;FBtr0080839;FBtr0080838	23	chif
FBtr0081263;FBtr0081264;FBtr0331245;FBtr0331246	23	Hakai
FBtr0300967;FBtr0300966;FBtr0332179;FBtr0081318	23	CdGAPr
FBtr0081357;FBtr0081356;FBtr0112885;FBtr0302106;FBtr0336748;FBtr0336749;FBtr0336747	23	RtGEF
FBtr0114520;FBtr0081756	23	Taf7
FBtr0081838	23	Arl2
FBtr0082069;FBtr0334654;FBtr0082068	23	MBD-like
FBtr0302935;FBtr0082329	23	CG6621
FBtr0082535;FBtr0082534	23	Lk6
FBtr0082600	23	lig3
FBtr0083048	23	CG4203
FBtr0334695;FBtr0083082;FBtr0330039	23	ear
FBtr0336472;FBtr0083619	23	cdm
FBtr0083771	23	Ino80
FBtr0084079;FBtr0084069;FBtr0084077;FBtr0084071;FBtr0307760;FBtr0084060;FBtr0084080;FBtr0114359;FBtr0084083;FBtr0114360;FBtr0307759;FBtr0084063;FBtr0084062;FBtr0084068	23	mod(mdg4)
FBtr0084546	23	Tsc1
FBtr0335006;FBtr0085527;FBtr0339942	23	dgt1
FBtr0303225;FBtr0303226;FBtr0086170	23	CG17002
FBtr0086734	23	Dip3
FBtr0306810;FBtr0087013	23	CG8950
FBtr0304748;FBtr0087247	23	CG8441
FBtr0303759;FBtr0087407	23	Lap1
FBtr0087702	23	arr
FBtr0087737;FBtr0087736	23	FLASH
FBtr0087840	23	spt4
FBtr0088499	23	Uba1
FBtr0088583	23	CG30344
FBtr0339328;FBtr0089973	23	Cenp-C
FBtr0100406;FBtr0100404;FBtr0100402	23	Dyrk3
FBtr0110974;FBtr0083229;FBtr0083231	23	Mhcl
FBtr0112350	23	CG34159
FBtr0273367;FBtr0273368	23	CG7504
FBtr0290212;FBtr0332176;FBtr0332175	23	CG1024
FBtr0336760;FBtr0336759;FBtr0336758;FBtr0300691	23	Kdm2
FBtr0304718	23	CG11839
FBtr0070328	24	CG4194
FBtr0071338	24	su(r)
FBtr0333271;FBtr0072639	24	bab2
FBtr0309972;FBtr0073375	24	Con
FBtr0301352;FBtr0301354;FBtr0301353;FBtr0074357	24	if
FBtr0074631;FBtr0334453;FBtr0074632	24	CG6891
FBtr0344070;FBtr0074740	24	CG14210
FBtr0077748	24	Cyp309a2
FBtr0078136	24	CG3625
FBtr0078297;FBtr0078300;FBtr0078299;FBtr0078298	24	CG10512
FBtr0078391;FBtr0303654;FBtr0303653;FBtr0078392;FBtr0078390;FBtr0078389	24	Hr78
FBtr0079042	24	Rtnl1
FBtr0343833;FBtr0308575;FBtr0308574;FBtr0081104	24	CG17323
FBtr0083052	24	Caf1
FBtr0084724;FBtr0084723	24	CG31121
FBtr0303227;FBtr0085829;FBtr0085827;FBtr0085825	24	ttk
FBtr0100232;FBtr0086492;FBtr0301609;FBtr0308796;FBtr0304655;FBtr0304656;FBtr0310331;FBtr0304654;FBtr0308792;FBtr0308790;FBtr0308786;FBtr0308797;FBtr0308791;FBtr0308785;FBtr0332857;FBtr0086495;FBtr0301610;FBtr0304653;FBtr0308795;FBtr0308793;FBtr0110898	24	sm
FBtr0089560	24	Sardh
FBtr0302695;FBtr0302694;FBtr0111032;FBtr0334303;FBtr0111031;FBtr0082039;FBtr0302693;FBtr0302692;FBtr0111029;FBtr0111028;FBtr0111027;FBtr0082038;FBtr0344283;FBtr0344284;FBtr0302691;FBtr0334304	24	ps
FBtr0310019;FBtr0310017;FBtr0310020;FBtr0310018;FBtr0344146	24	haf
FBtr0330280;FBtr0330279;FBtr0330278;FBtr0330276;FBtr0330269;FBtr0330277;FBtr0330275;FBtr0330270;FBtr0330273;FBtr0330272;FBtr0330271;FBtr0330274	24	cpo
FBtr0331508;FBtr0331507	24	CG43780
FBtr0344782;FBtr0081051;FBtr0340580;FBtr0081052;FBtr0112804	24	Fas3
FBtr0114366;FBtr0100254;FBtr0307173;FBtr0070091	25	elav
FBtr0301476;FBtr0113105;FBtr0071777	25	Oatp58Dc
FBtr0339539;FBtr0071845	25	babos
FBtr0332067;FBtr0332066;FBtr0332065;FBtr0077008	25	ImpL3
FBtr0331526;FBtr0331524;FBtr0331525;FBtr0078256	25	HIPP1
FBtr0309869;FBtr0078477	25	CG7470
FBtr0343404;FBtr0079495	25	LKR
FBtr0080108	25	CG6415
FBtr0085650	25	PH4alphaEFB
FBtr0085813	25	CG31002
FBtr0340470;FBtr0086510	25	wbl
FBtr0088028;FBtr0344879	25	otk
FBtr0301838;FBtr0301837;FBtr0301839;FBtr0300337	25	Ppn
FBtr0343371;FBtr0343370;FBtr0343369;FBtr0302153	25	mgl
FBtr0305705;FBtr0305703;FBtr0305702;FBtr0305704;FBtr0305701	25	CG43164
FBtr0332562;FBtr0332560;FBtr0332557;FBtr0332558	25	ab
FBtr0344723	25	cn
FBtr0077423	26	Bsg25A
FBtr0078836	26	opa
FBtr0079633;FBtr0079634	26	CG8372
FBtr0083143	26	Act88F
FBtr0083541	26	CG14317
FBtr0346862;FBtr0085557	26	Sry-alpha
FBtr0085754	26	bnk
FBtr0090014;FBtr0090015;FBtr0090023;FBtr0090022;FBtr0090018;FBtr0090016;FBtr0090029;FBtr0090026;FBtr0090024;FBtr0090021;FBtr0090028;FBtr0090019;FBtr0090017;FBtr0090027;FBtr0090013	26	MRP
FBtr0303249;FBtr0110947	26	CG34137
FBtr0072726;FBtr0072725	27	CG9184
FBtr0346344;FBtr0078596	27	Osi6
FBtr0343152;FBtr0079275	27	Tig
FBtr0079466	27	CG5958
FBtr0344551;FBtr0083583;FBtr0083581;FBtr0344550;FBtr0083582	27	CG7675
FBtr0332522;FBtr0079441	28	CG5177
FBtr0072392	29	CG3760
FBtr0073217	29	Ero1L
FBtr0074454	29	beta-Spec
FBtr0076123	29	crim
FBtr0077478	29	ft
FBtr0303471;FBtr0303470;FBtr0079653;FBtr0303468;FBtr0303467;FBtr0079658;FBtr0079656;FBtr0079654;FBtr0303469;FBtr0079657;FBtr0079655	29	CG13384
FBtr0080592	29	NimC4
FBtr0080851	29	CG5869
FBtr0344850;FBtr0080912;FBtr0080911	29	Ugt36Bc
FBtr0331931;FBtr0080932	29	Cyt-b5-r
FBtr0087220;FBtr0305090;FBtr0336734	29	Asph
FBtr0076574	30	Cp16
FBtr0076594;FBtr0076593	30	Prm
FBtr0332595;FBtr0077417	30	Clect27
FBtr0079003;FBtr0079002;FBtr0079001	30	Cg25C
FBtr0333541;FBtr0333540;FBtr0079036	30	vkg
FBtr0307091;FBtr0079727	30	Glt
FBtr0344131;FBtr0085196;FBtr0085195	30	Mlc1
FBtr0345678;FBtr0072397	31	uzip
FBtr0345005;FBtr0072593	31	CG13907
FBtr0333442;FBtr0072973;FBtr0072972	31	pgant6
FBtr0075191;FBtr0075190	31	Adgf-A
FBtr0100379;FBtr0078154;FBtr0078155;FBtr0078153	31	CG3164
FBtr0304138;FBtr0080036;FBtr0080035	31	Myo31DF
FBtr0337007;FBtr0080134;FBtr0080133;FBtr0337006	31	Fatp
FBtr0339713;FBtr0081765	31	CG2943
FBtr0088663	31	PPO2
FBtr0089221;FBtr0344706;FBtr0344705	31	CG11076
FBtr0310323	31	CG13185
FBtr0340093;FBtr0070448	32	Klp3A
FBtr0072733	32	Klp61F
FBtr0073410	32	feo
FBtr0075638;FBtr0303375;FBtr0333853	32	Cep135
FBtr0077659;FBtr0335387	32	CG3523
FBtr0080180	32	aurB
FBtr0082483	32	aurA
FBtr0344976;FBtr0085534	32	ncd
FBtr0344896;FBtr0344895;FBtr0301387;FBtr0087668	32	mars
FBtr0088046	32	RnrS
FBtr0070176;FBtr0336687;FBtr0305652;FBtr0305651;FBtr0302884	33	su(w[a])
FBtr0072151	33	Alas
FBtr0303901;FBtr0309209;FBtr0079890;FBtr0329986;FBtr0309210;FBtr0309211	33	CG5850
FBtr0080436	33	CG5287
FBtr0333830;FBtr0083630	33	CG7685
FBtr0083815	33	CG11447
FBtr0304671;FBtr0085211	33	Klp98A
FBtr0306574;FBtr0086966	33	CG6805
FBtr0086975	33	fat-spondin
FBtr0087738	33	CG4627
FBtr0346427;FBtr0342608;FBtr0305089;FBtr0089656;FBtr0089655	33	JhI-21
FBtr0073028;FBtr0073027	34	pfk
FBtr0074339	34	CG4872
FBtr0333600;FBtr0075498	34	Taspase1
FBtr0076254;FBtr0076255	34	CG8009
FBtr0076650	34	Nelf-E
FBtr0081156	34	l(2)37Cd
FBtr0273346;FBtr0273347;FBtr0082292;FBtr0273345;FBtr0082291;FBtr0306641;FBtr0082294;FBtr0082295	34	SelR
FBtr0084082	34	mod(mdg4)
FBtr0084644	34	CG6607
FBtr0085407	34	Mesh1
FBtr0086732;FBtr0346952;FBtr0113092;FBtr0329994	34	CG5098
FBtr0087058	34	NiPp1
FBtr0088154	34	ix
FBtr0112557	34	CG34348
FBtr0302324;FBtr0301102;FBtr0301101;FBtr0301104;FBtr0301103	34	CG42542
FBtr0340271	34	CG30109
FBtr0070134;FBtr0343759	35	CG5254
FBtr0070179	35	CG14629
FBtr0332839;FBtr0332838;FBtr0072506;FBtr0332837;FBtr0332836	35	miple2
FBtr0074946	35	CG9376
FBtr0329932;FBtr0329931;FBtr0303879;FBtr0079691;FBtr0303878;FBtr0303877;FBtr0329930	35	Sema-1a
FBtr0331328;FBtr0081254;FBtr0331330;FBtr0331329	35	Tep4
FBtr0083905;FBtr0345213;FBtr0083908;FBtr0083907;FBtr0083906;FBtr0083904	35	CG5191
FBtr0084816	35	RIOK2
FBtr0089766	35	Cyp6d5
FBtr0071755	36	GlcT-1
FBtr0346538;FBtr0073286	36	Claspin
FBtr0346273;FBtr0073409	36	sofe
FBtr0074593	36	Aats-his
FBtr0332481;FBtr0074741	36	MKP-4
FBtr0077994;FBtr0077993	36	S
FBtr0078802	36	hd
FBtr0344740;FBtr0078953	36	Skp2
FBtr0081475	36	Mcm10
FBtr0081569	36	Sas-4
FBtr0083674;FBtr0331352	36	gwl
FBtr0084368;FBtr0084369	36	CenB1A
FBtr0345802;FBtr0345011;FBtr0086185	36	Cyp6u1
FBtr0088946	36	CG17985
FBtr0309841;FBtr0100641;FBtr0309840	36	armi
FBtr0113388;FBtr0113386;FBtr0084927;FBtr0113384;FBtr0113387;FBtr0336451;FBtr0084928;FBtr0336452	36	LpR2
FBtr0303390	36	CG42762
FBtr0336819;FBtr0081223	36	fon
FBtr0070234	37	png
FBtr0070366	37	Pgam5
FBtr0345745;FBtr0070749	37	dhd
FBtr0070846	37	CG3149
FBtr0305591;FBtr0073690	37	CG3775
FBtr0332145;FBtr0076831	37	CG8539
FBtr0077118	37	Myt1
FBtr0077627;FBtr0077626;FBtr0077625	37	CG2991
FBtr0077693	37	Elba2
FBtr0331236;FBtr0079524;FBtr0079523;FBtr0331234;FBtr0331235	37	CG7115
FBtr0331671;FBtr0080092	37	Lrr47
FBtr0081544	37	alpha-Est1
FBtr0301488;FBtr0082815;FBtr0082814;FBtr0082813;FBtr0082812;FBtr0082811;FBtr0082810;FBtr0082809;FBtr0082808	37	lkb1
FBtr0344646;FBtr0083623	37	CG7218
FBtr0334312;FBtr0084165;FBtr0084164	37	tsl
FBtr0084317	37	CG4721
FBtr0084477;FBtr0084476;FBtr0334770	37	CG10254
FBtr0085145;FBtr0085146;FBtr0085139;FBtr0114372;FBtr0085140;FBtr0112834;FBtr0085138;FBtr0085137	37	spz
FBtr0088937;FBtr0330327;FBtr0088936;FBtr0306239;FBtr0330328;FBtr0088935	37	CG18812
FBtr0332409;FBtr0112638;FBtr0112639;FBtr0112641;FBtr0306333	37	CG34394
FBtr0113019	37	CG12795
FBtr0290016;FBtr0070084;FBtr0290017	37	svr
FBtr0302768;FBtr0302767;FBtr0345079;FBtr0344190;FBtr0302769;FBtr0302771	37	CG42678
FBtr0306232;FBtr0306229;FBtr0306228;FBtr0306230;FBtr0306233;FBtr0306231	37	milt
FBtr0333502;FBtr0333501;FBtr0333493;FBtr0333497;FBtr0333496;FBtr0333499;FBtr0333498;FBtr0345690;FBtr0333495;FBtr0333500;FBtr0333494;FBtr0345689;FBtr0333507;FBtr0333508;FBtr0333509;FBtr0333503;FBtr0333504	37	Glut1
FBtr0340140;FBtr0071111;FBtr0071110;FBtr0071109	38	CG2258
FBtr0071787	38	CG3045
FBtr0075108	38	bora
FBtr0077025	38	CG5568
FBtr0334401;FBtr0077429	38	Traf4
FBtr0079581	38	Rbsn-5
FBtr0081577	38	CG10050
FBtr0081605	38	CG10055
FBtr0301716;FBtr0083240	38	CG4287
FBtr0084555	38	CG6204
FBtr0087801;FBtr0302198	38	Mdr49
FBtr0346631;FBtr0088581	38	CG8788
FBtr0331379;FBtr0088790	38	Mlh1
FBtr0339264;FBtr0305050;FBtr0113297	38	CG6051
FBtr0334128;FBtr0334127;FBtr0334126;FBtr0334125;FBtr0334124	38	CG44001
FBtr0344825;FBtr0344826	38	CG32786;CG32783
FBtr0307159;FBtr0070445	39	Tsp3A
FBtr0100265;FBtr0070680	39	peb
FBtr0331308;FBtr0071019	39	CG4617
FBtr0071166	39	CG2147
FBtr0071838;FBtr0331942;FBtr0112820;FBtr0331941	39	px
FBtr0302895;FBtr0071951	39	CG9849
FBtr0343345;FBtr0072189;FBtr0072190	39	Not11
FBtr0072285	39	CG4049
FBtr0072338	39	CG4707
FBtr0343506;FBtr0072396	39	CG3829
FBtr0307162;FBtr0074768	39	CG14220
FBtr0074847	39	FRG1
FBtr0345391;FBtr0310276;FBtr0075018	39	Max
FBtr0075151;FBtr0347013;FBtr0075149;FBtr0075150;FBtr0306814;FBtr0306813;FBtr0075148	39	Eip75B
FBtr0332133;FBtr0075505	39	dbo
FBtr0302433;FBtr0075774	39	CG6833
FBtr0076024	39	CG5645
FBtr0332126;FBtr0332125;FBtr0332124;FBtr0076503	39	Slc45-1
FBtr0334813;FBtr0077852	39	CG11723
FBtr0077903	39	CG17712
FBtr0304820;FBtr0078288	39	Sin
FBtr0079139	39	CG7239
FBtr0343403;FBtr0079493	39	Herp
FBtr0080695	39	NC2beta
FBtr0080825	39	CG4935
FBtr0081780	39	pyd3
FBtr0306008;FBtr0082102	39	Scm
FBtr0082829	39	CG9288
FBtr0083116	39	Trs33
FBtr0290232;FBtr0290231;FBtr0290230;FBtr0084121	39	InR
FBtr0084405	39	CG31457
FBtr0321261;FBtr0084535	39	CG5986
FBtr0334869;FBtr0084598	39	Orct2
FBtr0331359;FBtr0084931;FBtr0084930;FBtr0084929	39	CLS
FBtr0085319	39	CG10011
FBtr0086094	39	CG10465
FBtr0086968;FBtr0086967	39	Dark
FBtr0087144	39	CG4282
FBtr0088074	39	Tret1-1
FBtr0089600;FBtr0342842	39	ktub
FBtr0344198;FBtr0100501	39	seq
FBtr0309372;FBtr0290258;FBtr0290256	39	yki
FBtr0299658;FBtr0300523;FBtr0346622;FBtr0300521	39	bun
FBtr0333219;FBtr0301492	39	olf413
FBtr0302576	39	yellow-e2
FBtr0304022	39	CG42806
FBtr0305657	39	Muc30E
FBtr0344362;FBtr0344360;FBtr0344359;FBtr0344361;FBtr0344358	39	CG45049
FBtr0070203	40	CG11381
FBtr0071202	40	Cp7Fc
FBtr0307381;FBtr0071412;FBtr0071411	40	CG32694
FBtr0345664;FBtr0071688	40	CG18870
FBtr0332881;FBtr0072792	40	CG13933
FBtr0346076;FBtr0072915	40	CG5704
FBtr0075361	40	CG4098
FBtr0076510	40	GNBP3
FBtr0076571	40	Cp18
FBtr0076638	40	S-Lap1
FBtr0309288;FBtr0303267;FBtr0079237	40	CG13992
FBtr0081954	40	osk
FBtr0082204	40	CG12811
FBtr0085871;FBtr0085870	40	CG2003
FBtr0086305	40	CG10444
FBtr0100003	40	Cp7Fa
FBtr0347302;FBtr0112535	40	Vml
FBtr0299789	40	CG42327
FBtr0300277;FBtr0300276	40	CG6967
FBtr0070315	41	mip130
FBtr0345294;FBtr0339504;FBtr0339503;FBtr0339502;FBtr0070877	41	sqh
FBtr0339464;FBtr0070962;FBtr0070961	41	CG14438
FBtr0342897;FBtr0342896;FBtr0300397;FBtr0071703;FBtr0306013	41	Fkbp14
FBtr0072332	41	CG4806
FBtr0073499;FBtr0073500;FBtr0332619	41	HP5
FBtr0342784;FBtr0074462	41	CG6398
FBtr0100445;FBtr0075705;FBtr0075703;FBtr0333045;FBtr0333046;FBtr0100444;FBtr0075708;FBtr0075707;FBtr0075706;FBtr0075704	41	Trl
FBtr0333042;FBtr0075728;FBtr0333041	41	stwl
FBtr0075970;FBtr0332643	41	sti
FBtr0332707;FBtr0076237;FBtr0076236	41	JIL-1
FBtr0332716;FBtr0078358;FBtr0078357	41	Cdk12
FBtr0078509;FBtr0306107;FBtr0330159	41	Ten-m
FBtr0079488	41	CG7154
FBtr0079697	41	CG13097
FBtr0343669;FBtr0080562;FBtr0080561	41	Smg5
FBtr0080639	41	l(2)34Fd
FBtr0081088	41	ncm
FBtr0081862	41	Sgt1
FBtr0339168;FBtr0081977	41	Ibf1
FBtr0310002;FBtr0082946;FBtr0082945	41	su(Hw)
FBtr0083456	41	SF1
FBtr0347218;FBtr0083504	41	l(3)07882
FBtr0085286;FBtr0300346;FBtr0085287	41	Moca-cyp
FBtr0085342	41	CG1951
FBtr0085757	41	CG1542
FBtr0086285;FBtr0086284;FBtr0345355;FBtr0086283	41	CG8929
FBtr0087170	41	wcd
FBtr0339649;FBtr0087822;FBtr0087821	41	fra
FBtr0088010	41	SmF
FBtr0088282;FBtr0088275;FBtr0346958;FBtr0088276;FBtr0330607;FBtr0100607;FBtr0100606;FBtr0088281;FBtr0088280;FBtr0088279;FBtr0088278;FBtr0088277	41	psq
FBtr0088393	41	CG12128
FBtr0342769;FBtr0070419	42	kz
FBtr0343600;FBtr0070508	42	CG3939
FBtr0307272;FBtr0071072	42	Rab39
FBtr0343339;FBtr0072250	42	enok
FBtr0072645;FBtr0072644	42	trio
FBtr0074039	42	CG6340
FBtr0332591;FBtr0074079	42	Scamp
FBtr0074453	42	CG5800
FBtr0074475	42	CG8173
FBtr0075969	42	Gcn5
FBtr0076772;FBtr0076771;FBtr0112817;FBtr0076774;FBtr0076773;FBtr0306647	42	pbl
FBtr0335170;FBtr0077694	42	Arpc5
FBtr0078011	42	Clp
FBtr0078928	42	Fip1
FBtr0079293;FBtr0079292;FBtr0079291	42	CG11050
FBtr0080364	42	CG6712
FBtr0080979	42	CG15141
FBtr0346139;FBtr0081959	42	CG11970
FBtr0082126;FBtr0113210	42	Pnn
FBtr0114375;FBtr0082793;FBtr0114376;FBtr0114374	42	yrt
FBtr0083087	42	CG31301
FBtr0083479	42	CG7655
FBtr0084374;FBtr0084375	42	EloA
FBtr0305573;FBtr0305571;FBtr0084403;FBtr0084402;FBtr0337052;FBtr0305572	42	unk
FBtr0337032;FBtr0085820;FBtr0337031	42	pasha
FBtr0085824;FBtr0085823	42	CG1815
FBtr0086083;FBtr0335258;FBtr0086082	42	d4
FBtr0087433;FBtr0339980	42	CG10139
FBtr0305588;FBtr0087442	42	BEAF-32
FBtr0346630;FBtr0087927	42	CG8525
FBtr0088235;FBtr0339521	42	CG30020
FBtr0088600	42	CG2063
FBtr0089110	42	bip2
FBtr0089580	42	Nopp140
FBtr0302248;FBtr0302247;FBtr0302246;FBtr0302245;FBtr0302244;FBtr0302243;FBtr0113871;FBtr0113870;FBtr0113869	42	Set1
FBtr0346586;FBtr0331677	42	CG8677
FBtr0333767;FBtr0333766;FBtr0333765;FBtr0333768	42	Smr
FBtr0307292;FBtr0307294;FBtr0070109;FBtr0307295;FBtr0307293;FBtr0307291	43	Appl
FBtr0342737;FBtr0342736;FBtr0342735;FBtr0330320;FBtr0330319;FBtr0330318;FBtr0070222;FBtr0070219;FBtr0330317	43	CG32813
FBtr0300772;FBtr0339493;FBtr0339491;FBtr0070988	43	CG14442
FBtr0335034;FBtr0335035;FBtr0307271;FBtr0071254;FBtr0071253	43	CG12075
FBtr0071821	43	wrapper
FBtr0342989;FBtr0071822	43	CG13506
FBtr0071835	43	CG6018
FBtr0072097;FBtr0072098;FBtr0072096	43	CG4091
FBtr0072153;FBtr0072155;FBtr0072154	43	CG3065
FBtr0072374	43	Eap
FBtr0073231	43	CG1273
FBtr0346316;FBtr0343649;FBtr0073692	43	CG4645
FBtr0346118;FBtr0073849	43	tth
FBtr0339691;FBtr0074045	43	CG7860
FBtr0308132;FBtr0308130;FBtr0074101;FBtr0074100;FBtr0340115;FBtr0346799;FBtr0308134;FBtr0308133;FBtr0308128;FBtr0112824;FBtr0308131;FBtr0301544;FBtr0301543;FBtr0310313;FBtr0310312;FBtr0308129;FBtr0112827;FBtr0112826;FBtr0112825;FBtr0074099;FBtr0310311	43	sd
FBtr0074669	43	Mec2
FBtr0075007	43	pip
FBtr0333897;FBtr0075013	43	pip
FBtr0075432;FBtr0075370	43	CG13041;CG13060
FBtr0075371	43	CG13059
FBtr0075548	43	CG7272
FBtr0075677	43	CG9628
FBtr0345366;FBtr0332077;FBtr0075887	43	CG11279
FBtr0076471	43	pall
FBtr0331584;FBtr0076480;FBtr0076484;FBtr0076483;FBtr0076482;FBtr0076481	43	CG3967
FBtr0305901;FBtr0076583	43	dally
FBtr0076946;FBtr0076945	43	Prat2
FBtr0303992;FBtr0077592	43	pgant2
FBtr0331230;FBtr0078061;FBtr0331231	43	CG4133
FBtr0344858;FBtr0332531;FBtr0332530;FBtr0301152;FBtr0079448;FBtr0079447;FBtr0079446	43	CG5973
FBtr0080006	43	CG5096
FBtr0345286;FBtr0080289;FBtr0080287	43	Ada1-1;Ada1-2
FBtr0080499	43	CG7099
FBtr0081340	43	Taf13
FBtr0081520;FBtr0081519;FBtr0081518;FBtr0333355	43	nrv3
FBtr0081694	43	Ccp84Ae
FBtr0081708	43	Osi20
FBtr0082458;FBtr0082459	43	CG6791
FBtr0082572	43	GstD5
FBtr0082704	43	ry
FBtr0083094	43	Ccm3
FBtr0303261;FBtr0303260;FBtr0083218	43	GATAe
FBtr0084450	43	Hmgcr
FBtr0084455;FBtr0335002;FBtr0084456;FBtr0084457	43	Lsd-1
FBtr0339250;FBtr0084508;FBtr0084507;FBtr0084506;FBtr0301418	43	KrT95D
FBtr0084601	43	CG6356
FBtr0085653	43	PH4alphaSG2
FBtr0086613	43	CG15080
FBtr0087473;FBtr0087472;FBtr0087471;FBtr0289934	43	CG10151
FBtr0339990;FBtr0087517	43	CG17385
FBtr0087869;FBtr0302151;FBtr0087870;FBtr0087868;FBtr0087867;FBtr0339742;FBtr0339741;FBtr0339740	43	nemy
FBtr0088133	43	CG7759
FBtr0088804	43	CG14756
FBtr0091626	43	CG33649
FBtr0331166;FBtr0331165;FBtr0111127	43	Cht3
FBtr0345695;FBtr0345694;FBtr0113158;FBtr0113159;FBtr0114600;FBtr0076344	43	nudE
FBtr0302849;FBtr0113692;FBtr0302848;FBtr0113694;FBtr0302850;FBtr0113687;FBtr0302846	43	Gfat1
FBtr0343596;FBtr0290021	43	CG5321
FBtr0300439	43	CG42487
FBtr0304046;FBtr0300557;FBtr0300554;FBtr0304047;FBtr0304049;FBtr0300556;FBtr0304048;FBtr0300559	43	PMCA
FBtr0300611;FBtr0334906	43	betaTub97EF
FBtr0302027	43	Mrp4
FBtr0303934;FBtr0303933;FBtr0307047;FBtr0303935;FBtr0077878;FBtr0077877	43	chinmo
FBtr0304996;FBtr0304993;FBtr0333948;FBtr0304998;FBtr0304999;FBtr0304995;FBtr0304997;FBtr0304994	43	Ect4
FBtr0332344;FBtr0332348;FBtr0332346;FBtr0332345;FBtr0305142;FBtr0305141;FBtr0332347;FBtr0332355;FBtr0332350;FBtr0332349;FBtr0332343;FBtr0332352;FBtr0332354;FBtr0332351;FBtr0332353;FBtr0305145	43	dp
FBtr0333712;FBtr0302322;FBtr0075078;FBtr0075077	43	CG3961
FBtr0339597;FBtr0344275;FBtr0082092;FBtr0344276;FBtr0300565;FBtr0300564;FBtr0082096;FBtr0082097;FBtr0303039;FBtr0082095;FBtr0344277;FBtr0082094	43	Unc-115a;Unc-115b
FBtr0339591;FBtr0339590;FBtr0070260	44	inc
FBtr0344007;FBtr0070401	44	phl
FBtr0074386;FBtr0302376;FBtr0302375	44	CG5004
FBtr0074612;FBtr0074613	44	CG6659
FBtr0333610;FBtr0075346	44	CG13025
FBtr0336885;FBtr0333419;FBtr0112743;FBtr0079695	44	lmgA
FBtr0333093;FBtr0333094;FBtr0080388	44	CG5446
FBtr0083356	44	CG10324
FBtr0089095;FBtr0089094;FBtr0089092	44	myo
FBtr0334157;FBtr0111126	44	cta
FBtr0333391;FBtr0301160	44	CG11307
FBtr0073898;FBtr0073897	45	yl
FBtr0082660;FBtr0082661;FBtr0330025	45	Men
FBtr0083508	45	Pxt
FBtr0083580	45	CG14309
FBtr0085382;FBtr0335406;FBtr0085383	45	CG14516
FBtr0100380;FBtr0070435;FBtr0331161	46	z
FBtr0071701	46	TAF1C-like
FBtr0343298;FBtr0072134	46	Lpt
FBtr0072899	46	CG15877
FBtr0333050;FBtr0075768	46	upSET
FBtr0333357;FBtr0076011	46	Pbgs
FBtr0331829;FBtr0076161	46	CG7616
FBtr0076241	46	CG32069
FBtr0345602;FBtr0076659	46	CG6983
FBtr0344274;FBtr0344273;FBtr0344272;FBtr0078766	46	ksr
FBtr0332554;FBtr0079135	46	CG11030
FBtr0347213;FBtr0347212;FBtr0082213;FBtr0082212;FBtr0082210;FBtr0082209;FBtr0306608;FBtr0306609;FBtr0347214;FBtr0082207;FBtr0082208;FBtr0347211	46	Mical
FBtr0302549;FBtr0083212	46	CG5516
FBtr0083303	46	CG14903
FBtr0334522;FBtr0083699;FBtr0083698	46	EndoA
FBtr0084496;FBtr0335244;FBtr0305040;FBtr0305039	46	AP-1sigma
FBtr0085549;FBtr0085548;FBtr0085547	46	CG11504
FBtr0345416;FBtr0086746	46	CG10915
FBtr0086782;FBtr0110965;FBtr0110964;FBtr0110966	46	Hsf
FBtr0087929;FBtr0087930;FBtr0100298;FBtr0305077;FBtr0308613;FBtr0305076;FBtr0113074	46	Dyb
FBtr0088564	46	Dbp45A
FBtr0088684	46	MrgBP
FBtr0309866;FBtr0088930;FBtr0308348;FBtr0070764	46	CanB2;CanB
FBtr0340071;FBtr0112384	46	CG34191
FBtr0333160;FBtr0112653	46	CG34401
FBtr0113395;FBtr0302187;FBtr0113396;FBtr0334560;FBtr0334559	46	Efa6
FBtr0299640;FBtr0333375;FBtr0333374;FBtr0299641	46	corn
FBtr0302548;FBtr0076873;FBtr0076872;FBtr0302547;FBtr0302546	46	Sh3beta
FBtr0330190;FBtr0330189;FBtr0305084;FBtr0305086;FBtr0333625;FBtr0333626;FBtr0305085;FBtr0075318	46	Dab
FBtr0340029;FBtr0072072;FBtr0072073;FBtr0340030;FBtr0340031	47	retn
FBtr0346640;FBtr0077130	47	spo
FBtr0344854;FBtr0077746	47	insv
FBtr0079358;FBtr0079361;FBtr0079360;FBtr0079357;FBtr0079359	47	sip2
FBtr0079929;FBtr0329984	47	bib
FBtr0344387;FBtr0082606	47	CG10035
FBtr0083847;FBtr0083848;FBtr0335243	47	mira
FBtr0084277	47	CG31156
FBtr0084716	47	Mink
FBtr0303037;FBtr0088004	47	Sr-CII
FBtr0088912	47	scra
FBtr0343758;FBtr0070562	48	rst
FBtr0070992	48	CG3224
FBtr0071625	48	CG4302
FBtr0073620	48	FucT6
FBtr0074486	48	CG8326
FBtr0306328;FBtr0306327;FBtr0074850;FBtr0074851;FBtr0306329;FBtr0306326;FBtr0308204;FBtr0302113	48	CG17233
FBtr0075715;FBtr0100362;FBtr0075714	48	RecQ5
FBtr0075999	48	Nrx-IV
FBtr0343249;FBtr0078045	48	ds
FBtr0078405	48	Pc
FBtr0079262;FBtr0113411	48	CG31638
FBtr0345288;FBtr0334838;FBtr0079440;FBtr0079439;FBtr0302587	48	CG5171
FBtr0301338;FBtr0301339;FBtr0332417;FBtr0303108;FBtr0079629;FBtr0303109;FBtr0079628;FBtr0079626;FBtr0332416;FBtr0302148;FBtr0332418;FBtr0079625;FBtr0302147	48	Pvr
FBtr0332187;FBtr0332186;FBtr0079759	48	CG18088
FBtr0082266;FBtr0082265;FBtr0305662;FBtr0100144;FBtr0082264	48	pug
FBtr0083189	48	cv-d
FBtr0083454;FBtr0083455;FBtr0321265;FBtr0321264	48	P5cr-2
FBtr0083724	48	CG14291
FBtr0084288	48	CG33099
FBtr0084309	48	HP1c
FBtr0086909	48	Sip1
FBtr0088440	48	CG1418
FBtr0088566;FBtr0330624	48	Vang
FBtr0091805	48	His1:CG33801
FBtr0333686;FBtr0112576;FBtr0333685;FBtr0114581;FBtr0114582	48	Glut4EF
FBtr0334915	48	CG6475
FBtr0343244;FBtr0343243	48	Cyp6a16
FBtr0071984	49	CG9890
FBtr0075781	49	blue
FBtr0077572	49	CG3246
FBtr0078116	49	CG11454
FBtr0340242;FBtr0302160;FBtr0079704;FBtr0079703	49	fu12
FBtr0083291	49	CG14883
FBtr0337060;FBtr0083371	49	Irc
FBtr0084933	49	CG4743
FBtr0346162;FBtr0085573	49	CG9747
FBtr0089709;FBtr0089707;FBtr0089706;FBtr0089708;FBtr0089710;FBtr0089703;FBtr0089704	49	MESK2
FBtr0345720;FBtr0329952;FBtr0089948;FBtr0114603	49	CG9527
FBtr0344703;FBtr0331591;FBtr0308070;FBtr0114452;FBtr0331594;FBtr0114451;FBtr0344702	49	CG10353
FBtr0302974;FBtr0302973;FBtr0302978;FBtr0302975;FBtr0302976;FBtr0302979;FBtr0339707;FBtr0302972;FBtr0344191;FBtr0302977	49	CG42708
FBtr0307307	49	CG43366
FBtr0335000;FBtr0078785	49	CG1161
FBtr0344537;FBtr0344536;FBtr0344535	49	CG45089
FBtr0070121	50	CG13367
FBtr0345710;FBtr0070501;FBtr0273276	50	Csat
FBtr0343297;FBtr0070671	50	CG6379
FBtr0070836	50	CG3097
FBtr0308339;FBtr0070848;FBtr0340222	50	Tre1
FBtr0331599;FBtr0331600;FBtr0070945	50	Pat1
FBtr0071004	50	bou
FBtr0071545	50	CG15653
FBtr0071848	50	T3dh
FBtr0072561	50	Reg-2
FBtr0072878	50	CG13807
FBtr0073062	50	Drsl5
FBtr0343639;FBtr0112977;FBtr0112976;FBtr0112975;FBtr0073376	50	CG15211
FBtr0343563;FBtr0343562;FBtr0073495;FBtr0073494;FBtr0343561;FBtr0073496	50	Gs2
FBtr0074173;FBtr0074171;FBtr0074170;FBtr0074169	50	Myb
FBtr0074661	50	CG18259
FBtr0332726;FBtr0310476;FBtr0100666;FBtr0332153;FBtr0074882	50	Deaf1
FBtr0075005	50	pip
FBtr0076622	50	GstO3
FBtr0300413;FBtr0076769;FBtr0332787;FBtr0332789;FBtr0332790;FBtr0332792;FBtr0345912;FBtr0332788;FBtr0300412;FBtr0332791;FBtr0076768	50	syd
FBtr0077119	50	vito
FBtr0077431	50	Tps1
FBtr0079099	50	CG31915
FBtr0307062;FBtr0307064;FBtr0307061;FBtr0331675;FBtr0307063;FBtr0307060;FBtr0079102;FBtr0079101	50	Oscillin
FBtr0332523;FBtr0079443;FBtr0308610	50	chm
FBtr0336618;FBtr0080429	50	Vha68-1
FBtr0343768;FBtr0080894	50	yellow-b
FBtr0331620;FBtr0080909	50	Ugt36Ba
FBtr0081086;FBtr0081085;FBtr0300676;FBtr0300675	50	CG10283
FBtr0081689	50	Ccp84Ag
FBtr0082507;FBtr0335438	50	CG10005
FBtr0299594;FBtr0082517	50	CG6959
FBtr0083529	50	CG7379
FBtr0083899;FBtr0113252	50	CG4360
FBtr0083992	50	CG17272
FBtr0084081	50	mod(mdg4)
FBtr0343806;FBtr0084095;FBtr0343807;FBtr0343805	50	CG16791
FBtr0346732;FBtr0084127	50	CG31233
FBtr0084128	50	CG31198
FBtr0305320;FBtr0084236	50	CG5380
FBtr0339262;FBtr0085106	50	CG5815
FBtr0085125;FBtr0339249;FBtr0085124;FBtr0339248;FBtr0085126	50	CG31064
FBtr0085131	50	CG6066
FBtr0305975;FBtr0305974;FBtr0305973;FBtr0305972;FBtr0305971;FBtr0085174	50	mrt
FBtr0085571	50	CG9743
FBtr0085579;FBtr0110834	50	CG31030
FBtr0085755	50	CG1544
FBtr0087244	50	shark
FBtr0087351	50	Flo1
FBtr0087581	50	CG13018
FBtr0273226;FBtr0273225;FBtr0301592;FBtr0087619;FBtr0273223;FBtr0273224;FBtr0273222;FBtr0087617;FBtr0301591;FBtr0087616;FBtr0304849;FBtr0304850;FBtr0301593;FBtr0304852;FBtr0304848;FBtr0304853;FBtr0304847;FBtr0087618;FBtr0301964;FBtr0087620;FBtr0304851	50	shot
FBtr0087745;FBtr0345532	50	Mp20
FBtr0331386;FBtr0088135	50	CG7763
FBtr0339337;FBtr0088710	50	gcl
FBtr0343132;FBtr0089350	50	lola
FBtr0100580;FBtr0100577;FBtr0089442;FBtr0100582;FBtr0100581;FBtr0100578;FBtr0100579;FBtr0332977;FBtr0332976;FBtr0089441;FBtr0332978;FBtr0308208;FBtr0308209	50	ewg
FBtr0089579;FBtr0332812	50	Nopp140
FBtr0343029;FBtr0112754;FBtr0112753;FBtr0331304;FBtr0112755;FBtr0308591;FBtr0343028	50	CG34449
FBtr0113204	50	CG7900
FBtr0331306;FBtr0331738;FBtr0331305;FBtr0300106;FBtr0331737	50	oc
FBtr0335247;FBtr0301390	50	dsd
FBtr0333841;FBtr0333839;FBtr0333838;FBtr0333840;FBtr0333842;FBtr0075987	50	Ncc69
FBtr0335432;FBtr0335431;FBtr0306344;FBtr0078942;FBtr0306343;FBtr0078941;FBtr0078939	50	CG31522
FBtr0073015	51	CG12093
FBtr0340552;FBtr0340551;FBtr0080172;FBtr0080171;FBtr0080170	51	CG33129
FBtr0085194	51	RpS10a
FBtr0304018;FBtr0075323;FBtr0075322	52	Nrt
FBtr0077223	52	pen
FBtr0079543	52	Mcr
FBtr0343426;FBtr0079698	52	CG13096
FBtr0091868;FBtr0091865;FBtr0091862;FBtr0091859;FBtr0091856;FBtr0091853;FBtr0091850;FBtr0091847;FBtr0091844;FBtr0091841;FBtr0091835;FBtr0091832;FBtr0091829;FBtr0091826;FBtr0091823;FBtr0091820;FBtr0091817;FBtr0091814;FBtr0091808;FBtr0085892;FBtr0091811;FBtr0091838	52	His1:CG33864;His1:CG33861;His1:CG33858;His1:CG33855;His1:CG33852;His1:CG33849;His1:CG33846;His1:CG33843;His1:CG33840;His1:CG33837;His1:CG33831;His1:CG33828;His1:CG33825;His1:CG33822;His1:CG33819;His1:CG33816;His1:CG33813;His1:CG33810;His1:CG33804;His1:CG31617;His1:CG33807;His1:CG33834
FBtr0100321;FBtr0100323;FBtr0100320	52	fabp
FBtr0070088	53	arg
FBtr0345513;FBtr0310611;FBtr0070197	53	CG11378
FBtr0070833	53	CG3108
FBtr0072403	53	CG2736
FBtr0072635	53	CG9119
FBtr0345817;FBtr0072771;FBtr0072770;FBtr0072769;FBtr0072768;FBtr0072767	53	Gk
FBtr0331551;FBtr0076307;FBtr0076305;FBtr0339899	53	ect
FBtr0306737;FBtr0077334	53	obst-A
FBtr0077717	53	Taf10
FBtr0078380	53	CG7173
FBtr0078607	53	Osi15
FBtr0343656;FBtr0080531	53	CG31813
FBtr0346967;FBtr0081617;FBtr0081616	53	Mlp84B
FBtr0082691	53	Cyp304a1
FBtr0330312;FBtr0290023;FBtr0083592;FBtr0083591;FBtr0083590;FBtr0083589;FBtr0330313	53	PKD
FBtr0337027;FBtr0084351	53	CG17109
FBtr0085035	53	TwdlD
FBtr0345536;FBtr0086181	53	Tsp42Ed
FBtr0303762;FBtr0303761;FBtr0303760;FBtr0087428	53	CG10253
FBtr0087975	53	CG8321
FBtr0088038	53	Zip48C
FBtr0088104;FBtr0088103;FBtr0088102	53	Syx6
FBtr0345120;FBtr0089585	53	TpnC73F
FBtr0307883;FBtr0112560	53	Np
FBtr0273301	53	CG6026
FBtr0331840;FBtr0331839;FBtr0301222;FBtr0301221;FBtr0290277	53	frac
FBtr0306644;FBtr0306643;FBtr0083031;FBtr0083033;FBtr0334928;FBtr0302146;FBtr0302142;FBtr0302145;FBtr0302144;FBtr0083034	53	Mf
FBtr0306927	53	CG43333
FBtr0333172;FBtr0333171;FBtr0333170	53	CG9380
FBtr0344444	53	fau
FBtr0070946;FBtr0070947	54	APC7
FBtr0073115;FBtr0073117;FBtr0073116;FBtr0333894;FBtr0113133;FBtr0113132	54	CG11537
FBtr0073959;FBtr0073958	54	CG5541
FBtr0075233;FBtr0075232;FBtr0075234;FBtr0339898;FBtr0075235	54	blot
FBtr0078559	54	BoYb
FBtr0079841;FBtr0079842;FBtr0302199	54	GlcAT-S
FBtr0310645;FBtr0081220;FBtr0081219;FBtr0300823;FBtr0081221	54	CG17549
FBtr0082361;FBtr0082360;FBtr0308073	54	CG17734
FBtr0084009	54	rtet
FBtr0086535	54	CG7744
FBtr0087388	54	Pms2
FBtr0089584	54	CG7730
FBtr0309295;FBtr0309294;FBtr0089876;FBtr0089874;FBtr0332883;FBtr0089878;FBtr0089877;FBtr0089875;FBtr0089873	54	Nmda1
FBtr0110971;FBtr0345950;FBtr0110970;FBtr0346955;FBtr0330005;FBtr0330004	54	Mctp
FBtr0308810;FBtr0111111	54	Stlk
FBtr0300028;FBtr0112436	54	CG34242
FBtr0344861;FBtr0344860;FBtr0331674;FBtr0300183;FBtr0114550	54	pes
FBtr0344864;FBtr0290281	54	slam
FBtr0299882;FBtr0299881;FBtr0299880;FBtr0301725	54	AGO3
FBtr0301431;FBtr0301429;FBtr0301430;FBtr0301428	54	MCPH1
FBtr0071242;FBtr0302500	55	CG15347
FBtr0345505;FBtr0071934	55	Ugt58Fa
FBtr0072822	55	CG13928
FBtr0076084	55	CG10361
FBtr0344910;FBtr0076093	55	chrb
FBtr0077128	55	CG10591
FBtr0079314;FBtr0079313;FBtr0079311;FBtr0114488;FBtr0079312	55	Tsp
FBtr0334884;FBtr0081571;FBtr0334885;FBtr0081570	55	sas
FBtr0081729	55	Neurochondrin
FBtr0082087	55	alphaTub85E
FBtr0334590;FBtr0083119	55	CG6218
FBtr0084736	55	RabX4
FBtr0085486;FBtr0085485	55	neo
FBtr0346230;FBtr0085790	55	mey
FBtr0334008;FBtr0086555	55	CG9416
FBtr0086917	55	Lhr
FBtr0306250;FBtr0306249;FBtr0302206;FBtr0302205;FBtr0087108	55	CG5065
FBtr0339459;FBtr0088349	55	Ndg
FBtr0089041	55	Spn43Aa
FBtr0089686;FBtr0114453;FBtr0089685	55	CRMP
FBtr0335146;FBtr0089947;FBtr0335501;FBtr0089946;FBtr0089945	55	vari
FBtr0340452;FBtr0100282;FBtr0290317;FBtr0340453;FBtr0290314;FBtr0290318;FBtr0290316;FBtr0086588;FBtr0086585;FBtr0290312;FBtr0340451;FBtr0290313;FBtr0290311;FBtr0086586	55	CG10737
FBtr0303445	55	CG31808
FBtr0070258;FBtr0339588	56	mei-38
FBtr0336977;FBtr0074222	56	CG3679
FBtr0310519;FBtr0074342	56	CG4880
FBtr0075363	56	spd-2
FBtr0346530;FBtr0076499;FBtr0333886	56	Klp67A
FBtr0080833	56	fzy
FBtr0334578;FBtr0084728	56	CycB3
FBtr0344665;FBtr0336726;FBtr0085082	56	Tsp97E
FBtr0086629	56	CG15098
FBtr0088959	56	Orc1
FBtr0089357;FBtr0089347;FBtr0343133;FBtr0334469	56	lola;pre-lola-G
FBtr0330006	56	Jabba
FBtr0339694;FBtr0339693;FBtr0073544;FBtr0073543	57	CG1572
FBtr0075284	57	CG7724
FBtr0078617	57	Obp83g
FBtr0344832;FBtr0078795	57	CG2663
FBtr0302990;FBtr0080560	57	CG16886
FBtr0086939;FBtr0086938;FBtr0340216	57	CG4853
FBtr0088062	57	TwdlBeta
FBtr0340002;FBtr0273307	57	CG12964
FBtr0301063;FBtr0299918;FBtr0299921;FBtr0335262;FBtr0299920	57	laccase2
FBtr0331384;FBtr0070313	58	CG14806
FBtr0070584;FBtr0070583	58	Rala
FBtr0074058	58	Pis
FBtr0074540	58	CG7772
FBtr0077629	58	CG8814
FBtr0079951	58	eEF1delta
FBtr0080358	58	CG6583
FBtr0081178	58	Ttc19
FBtr0087332;FBtr0087331;FBtr0340001	58	GalNAc-T1
FBtr0303034;FBtr0303033;FBtr0303032;FBtr0089925;FBtr0089924;FBtr0089923;FBtr0089922;FBtr0089921;FBtr0089920	58	Zip99C
FBtr0339084;FBtr0339085	58	CG44242
FBtr0075101;FBtr0075112	59	CG7271;term
FBtr0300699;FBtr0075873	59	CG11263
FBtr0304650;FBtr0076075	59	CycA
FBtr0077378	59	Elba3
FBtr0343239;FBtr0077569	59	CG3238
FBtr0344088;FBtr0335478;FBtr0077653	59	CG17260
FBtr0078743	59	asl
FBtr0079962	59	Ripalpha
FBtr0082365	59	CG17187
FBtr0340456;FBtr0086503;FBtr0340454;FBtr0340455;FBtr0086504	59	hppy
FBtr0088886;FBtr0309844	59	Kdm4A
FBtr0336908;FBtr0088961	59	Incenp
FBtr0100617;FBtr0336483;FBtr0336484;FBtr0078907	59	CG9795
FBtr0301590	59	Spindly
FBtr0302133	59	CG16734
FBtr0340202;FBtr0070610;FBtr0070609;FBtr0340201	60	CG2930
FBtr0333186;FBtr0070668;FBtr0333185	60	Tip60
FBtr0310287;FBtr0333203;FBtr0112946;FBtr0071079	60	CHES-1-like
FBtr0310444;FBtr0071510	60	CG1628
FBtr0332593;FBtr0071524;FBtr0332594;FBtr0303195	60	CG10543
FBtr0071795;FBtr0071794;FBtr0071793;FBtr0071791;FBtr0071796;FBtr0342980;FBtr0113104;FBtr0302298;FBtr0071792;FBtr0302295;FBtr0302297;FBtr0302296	60	Vrp1
FBtr0072315	60	CG3548
FBtr0332103;FBtr0332104;FBtr0301348;FBtr0072521;FBtr0332102;FBtr0072522;FBtr0332101	60	E(bx)
FBtr0072965;FBtr0072966;FBtr0072964;FBtr0072963;FBtr0306577;FBtr0331414	60	CG16758
FBtr0073451	60	CG1738
FBtr0331718;FBtr0073662;FBtr0273245	60	CG11138
FBtr0343380;FBtr0073978	60	CG9509
FBtr0074684;FBtr0301226	60	CG8034
FBtr0339436;FBtr0339435;FBtr0301703;FBtr0074812	60	meso18E
FBtr0076513;FBtr0301139;FBtr0076514;FBtr0301140	60	CG5021
FBtr0345911;FBtr0076944;FBtr0346999;FBtr0346998;FBtr0330059	60	vvl
FBtr0077016	60	D19A
FBtr0330118;FBtr0077032	60	CG32407
FBtr0077090	60	lin-28
FBtr0336990;FBtr0078143	60	Rpp30
FBtr0079026	60	pgant5
FBtr0345615;FBtr0331635;FBtr0079894	60	CG5853
FBtr0343108;FBtr0081096	60	CG10338
FBtr0081195;FBtr0330209	60	drl
FBtr0310411;FBtr0081787	60	CG10903
FBtr0081866	60	CG9630
FBtr0082031;FBtr0334302	60	alpha-Man-II
FBtr0082124;FBtr0305340	60	RhoL
FBtr0082598	60	Cyp9f2
FBtr0083066	60	CG4338
FBtr0083348;FBtr0083352;FBtr0083350;FBtr0083349;FBtr0083351;FBtr0083347	60	Ubx
FBtr0306337;FBtr0300485;FBtr0083387;FBtr0083388	60	abd-A
FBtr0083665;FBtr0083664	60	CG7702
FBtr0301402;FBtr0301401;FBtr0084177;FBtr0084178;FBtr0100514	60	how
FBtr0334870;FBtr0084599	60	Orct
FBtr0084712	60	CG11069
FBtr0085088;FBtr0330167	60	Ets97D
FBtr0333327;FBtr0085123;FBtr0085122	60	CG18766
FBtr0085964	60	Clamp
FBtr0086336	60	Toll-7
FBtr0086509;FBtr0340469	60	cora
FBtr0087441	60	BEAF-32
FBtr0087621	60	shot
FBtr0304899;FBtr0300578;FBtr0304900;FBtr0303223;FBtr0088214;FBtr0339463;FBtr0330601	60	stan
FBtr0088447;FBtr0088446;FBtr0330707;FBtr0088445;FBtr0088444;FBtr0088443;FBtr0330708	60	Mef2
FBtr0088928	60	CG1942
FBtr0332913;FBtr0307167;FBtr0089070	60	zfh2
FBtr0100230	60	CG18003
FBtr0346453;FBtr0333516;FBtr0112506	60	CG34310
FBtr0330338;FBtr0112593	60	Fili
FBtr0332323;FBtr0332322;FBtr0300341	60	kon
FBtr0332039;FBtr0332038;FBtr0301236;FBtr0301235;FBtr0301234	60	CG9171
FBtr0309030;FBtr0301241;FBtr0301240;FBtr0339815	60	CG9650
FBtr0303387;FBtr0332406	60	Msp300
FBtr0307040;FBtr0307041;FBtr0329969	60	Ncoa6
FBtr0309110;FBtr0309109;FBtr0309106;FBtr0340491;FBtr0309112;FBtr0309102;FBtr0309111;FBtr0309108;FBtr0309104	60	hts
FBtr0331510;FBtr0331509	60	CG43781
FBtr0334673;FBtr0334672;FBtr0081613;FBtr0081612;FBtr0334677	60	Alh
FBtr0070098;FBtr0339442;FBtr0339443	61	ebo
FBtr0331786;FBtr0072552;FBtr0072551	61	hipk
FBtr0074130	61	CG8924
FBtr0332889;FBtr0344152;FBtr0074747	61	Ssu72
FBtr0074761	61	CG12237
FBtr0345014;FBtr0074808;FBtr0074807;FBtr0344733;FBtr0307537	61	vfl
FBtr0075570	61	CG7372
FBtr0075591	61	CG7650
FBtr0077537;FBtr0077538	61	CG2818
FBtr0078317;FBtr0078316	61	CG33054
FBtr0080526;FBtr0080525	61	CG9293
FBtr0080836	61	CG4455
FBtr0273194;FBtr0081095	61	CG10336
FBtr0081258	61	msb1l
FBtr0081332	61	neb
FBtr0081568	61	CG2656
FBtr0345353;FBtr0342718;FBtr0086236;FBtr0345354	61	CG30152
FBtr0340013;FBtr0308815;FBtr0308814;FBtr0087287	61	tun
FBtr0088273	61	CG11777
FBtr0336916;FBtr0089015	61	cos
FBtr0089178;FBtr0306168	61	ci
FBtr0089427	61	ptc
FBtr0300944;FBtr0333068	61	Ccs
FBtr0334763;FBtr0302612;FBtr0302120;FBtr0078037;FBtr0302121	61	drongo
FBtr0334287;FBtr0334286;FBtr0334292	61	btsz
FBtr0070159	62	CG13364
FBtr0332423;FBtr0071537;FBtr0071536;FBtr0071535;FBtr0071540;FBtr0071539;FBtr0071538	62	Treh
FBtr0331406;FBtr0273235;FBtr0073522;FBtr0330394;FBtr0330393;FBtr0330392	62	Ptp10D
FBtr0074031	62	CG11655
FBtr0075269;FBtr0075267	62	Nc73EF
FBtr0076146	62	rt
FBtr0076508;FBtr0076507;FBtr0076506	62	Tsp66E
FBtr0080996;FBtr0080997;FBtr0306165	62	qua
FBtr0337012;FBtr0084749;FBtr0084750	62	Nmnat
FBtr0306292;FBtr0085722;FBtr0085721	62	Npc2h
FBtr0086071	62	CG17508
FBtr0332727;FBtr0310477;FBtr0089596;FBtr0089595;FBtr0332728	62	Fibp
FBtr0333380;FBtr0301804;FBtr0301803;FBtr0301802;FBtr0301797;FBtr0113813	62	CG40160
FBtr0300100;FBtr0344966;FBtr0273362	62	Sug
FBtr0333401;FBtr0072704;FBtr0072705;FBtr0333402;FBtr0072703	62	CG12090
FBtr0070362;FBtr0070363	63	trr
FBtr0333511;FBtr0070372	63	CG14812
FBtr0336732;FBtr0071985	63	l(2)06496
FBtr0072165	63	CG3163
FBtr0072261	63	cN-IIIB
FBtr0343489;FBtr0072342	63	Fcp1
FBtr0331867;FBtr0072729;FBtr0345006	63	CG2277
FBtr0072827;FBtr0072826	63	CG7879
FBtr0072890	63	CG9004
FBtr0073212	63	Ras64B
FBtr0073732;FBtr0310647;FBtr0340190;FBtr0073731;FBtr0310648;FBtr0330398	63	mew
FBtr0073779;FBtr0301559	63	Set2
FBtr0339838;FBtr0073790;FBtr0304001	63	Rbp1-like
FBtr0346188;FBtr0074087	63	CG8239
FBtr0346189;FBtr0340116;FBtr0074104	63	CG8578
FBtr0346059;FBtr0074240	63	CG9914
FBtr0340315;FBtr0074305	63	TH1
FBtr0074558	63	CG6179
FBtr0339440;FBtr0074717;FBtr0074716;FBtr0339439;FBtr0307194;FBtr0307193;FBtr0307192;FBtr0074720;FBtr0074719;FBtr0074718;FBtr0074715;FBtr0074714;FBtr0074713	63	Pfrx
FBtr0332735;FBtr0330194;FBtr0299586;FBtr0112890;FBtr0075029;FBtr0075028;FBtr0330195	63	fz2
FBtr0333123;FBtr0075201	63	Vps60
FBtr0307336;FBtr0075311	63	l(3)73Ah
FBtr0075483	63	PDCD-5
FBtr0075600;FBtr0075599	63	CG7945
FBtr0076468	63	Jarid2
FBtr0333907;FBtr0076519	63	CG5068
FBtr0302045;FBtr0076846;FBtr0332729	63	qm
FBtr0076878	63	CTCF
FBtr0077017	63	D19B
FBtr0077063	63	CG10467
FBtr0077154	63	CG10635
FBtr0077454	63	CG15440
FBtr0077650	63	CG17219
FBtr0077712	63	Cwc25
FBtr0078089	63	CG11885
FBtr0343777;FBtr0078128	63	CG11555
FBtr0078139	63	mbm
FBtr0078733;FBtr0330315	63	MTA1-like
FBtr0306106;FBtr0078849	63	Ubc6
FBtr0078962;FBtr0078961	63	CG12581
FBtr0331229;FBtr0079050;FBtr0079051	63	l(2)05714
FBtr0079301;FBtr0079300;FBtr0329942;FBtr0329943;FBtr0329941	63	Liprin-alpha
FBtr0343415;FBtr0301329;FBtr0079489	63	r2d2
FBtr0079799	63	Cks30A
FBtr0079874	63	Bka
FBtr0080162	63	Art8
FBtr0340234;FBtr0080880	63	CG5888
FBtr0081070;FBtr0343825;FBtr0343826	63	CG15160
FBtr0081077	63	Cyp310a1
FBtr0081347	63	vls
FBtr0346451;FBtr0081501	63	E2f2
FBtr0081559	63	CG1142
FBtr0081563	63	CG10098
FBtr0336755;FBtr0082005	63	tgo
FBtr0082431	63	CG14722
FBtr0082849	63	CG9588
FBtr0345212;FBtr0339530;FBtr0333920;FBtr0083079;FBtr0083078;FBtr0083080	63	Tm2
FBtr0083391	63	CG5220
FBtr0083720	63	snRNP-U1-C
FBtr0347007;FBtr0083752;FBtr0330044	63	Ppcs
FBtr0334605;FBtr0084336	63	Gclm
FBtr0309097;FBtr0309096;FBtr0309095;FBtr0084602;FBtr0299530	63	CG6364
FBtr0084765	63	PQBP1
FBtr0084787;FBtr0301664	63	veli
FBtr0085272	63	CG5003
FBtr0336788;FBtr0085310	63	htt
FBtr0085422;FBtr0085423;FBtr0303148;FBtr0085424;FBtr0303454	63	Ptp99A
FBtr0085558	63	Sry-delta
FBtr0307501;FBtr0307500;FBtr0086003	63	Ptr
FBtr0086254;FBtr0342722	63	CG11180
FBtr0086268	63	CG13427
FBtr0086560	63	mip40
FBtr0086701	63	Pepck
FBtr0304733;FBtr0086827	63	CG14480
FBtr0086915;FBtr0086914;FBtr0086913;FBtr0086912	63	l(2)k01209
FBtr0329955;FBtr0346265;FBtr0087357;FBtr0329957;FBtr0329956	63	Khc-73
FBtr0345375;FBtr0345196;FBtr0087798	63	Psc
FBtr0088180;FBtr0088179;FBtr0088178	63	Fbl6
FBtr0088258	63	Git
FBtr0310033;FBtr0310032;FBtr0310031;FBtr0088547	63	CG1888
FBtr0304798;FBtr0088597;FBtr0332998;FBtr0112930	63	Drep-2
FBtr0345284;FBtr0089126;FBtr0089125;FBtr0334479	63	Hcf
FBtr0346441;FBtr0346440;FBtr0089420	63	Aprt
FBtr0089728;FBtr0339473;FBtr0089729	63	CG18004
FBtr0089879	63	Bet3
FBtr0333721;FBtr0089978;FBtr0089974;FBtr0340141;FBtr0100376;FBtr0333720;FBtr0308217;FBtr0100375;FBtr0111034;FBtr0340142;FBtr0308218;FBtr0308220;FBtr0308219;FBtr0089975	63	sdt
FBtr0332000;FBtr0091489;FBtr0091487;FBtr0091486	63	PNUTS
FBtr0112379	63	Rpb12
FBtr0339958;FBtr0114494;FBtr0114493	63	Rpn13
FBtr0340547;FBtr0273268	63	CG5180
FBtr0300453	63	CG32638
FBtr0300775	63	CG1319
FBtr0301728;FBtr0334592;FBtr0301727;FBtr0301731;FBtr0301730;FBtr0301726;FBtr0309863;FBtr0309862;FBtr0309861;FBtr0301732;FBtr0309860;FBtr0309859	63	nsl1
FBtr0333944;FBtr0333945;FBtr0333941;FBtr0333947;FBtr0305977;FBtr0333942;FBtr0333943;FBtr0333939;FBtr0305979;FBtr0333946;FBtr0333940;FBtr0099993	63	cp309
FBtr0310379	63	Rpb4
FBtr0310440	63	CG34422
FBtr0330734;FBtr0330733;FBtr0330731;FBtr0330730;FBtr0330732;FBtr0330729	63	sli
FBtr0335514;FBtr0335512;FBtr0335513	63	koi
FBtr0345112;FBtr0345104;FBtr0345105	63	CG45186
FBtr0070008	64	CG9578
FBtr0070025	64	AnxB10
FBtr0346350;FBtr0333306;FBtr0071465	64	Psf3
FBtr0344196;FBtr0342801;FBtr0071563	64	sktl
FBtr0072241	64	Nxt1
FBtr0343436;FBtr0303783;FBtr0072260	64	ocm
FBtr0331403;FBtr0072596	64	CG13901
FBtr0072679	64	l(3)02640
FBtr0073540	64	e(y)2
FBtr0100168;FBtr0073789	64	Yippee
FBtr0340292;FBtr0303418;FBtr0303419;FBtr0073834	64	jub
FBtr0310270;FBtr0073957;FBtr0073956	64	be
FBtr0074042;FBtr0343525;FBtr0074043	64	Gmap
FBtr0074203	64	Arp6
FBtr0343519;FBtr0308619;FBtr0074214;FBtr0074212;FBtr0074211	64	eas
FBtr0304839;FBtr0304840;FBtr0074412;FBtr0310524;FBtr0330596;FBtr0310525	64	CG8949
FBtr0342846;FBtr0074603	64	phm
FBtr0330093;FBtr0075032	64	Gem2
FBtr0333577;FBtr0075518;FBtr0330161	64	Hip14
FBtr0075607	64	Tollo
FBtr0075784	64	ptip
FBtr0332766;FBtr0076131;FBtr0076130	64	CG11652
FBtr0076186	64	Ube3a
FBtr0076270	64	CG7949
FBtr0076648	64	GAPsec
FBtr0076655	64	CG6683
FBtr0076695	64	CG8005
FBtr0076851;FBtr0333404;FBtr0331849	64	smid
FBtr0077085	64	l(3)psg2
FBtr0077192	64	fliI
FBtr0077453	64	Gs1l
FBtr0077573	64	Cog3
FBtr0077835	64	mio
FBtr0310022;FBtr0078069	64	cold
FBtr0078210	64	CG4858
FBtr0078289;FBtr0111038;FBtr0301602;FBtr0078290	64	siz
FBtr0078309	64	CG12975
FBtr0078426;FBtr0330117	64	Atox1
FBtr0078722	64	Madm
FBtr0078842	64	CG12007
FBtr0329981;FBtr0079018	64	CG5828
FBtr0079297	64	CG11070
FBtr0079601	64	CG7787
FBtr0346463;FBtr0079640	64	CG8498
FBtr0333414;FBtr0333413;FBtr0079683	64	CG13090
FBtr0079750	64	PrBP
FBtr0079895	64	Apf
FBtr0080110	64	CG6443
FBtr0340549;FBtr0080146	64	YL-1
FBtr0340541;FBtr0080394	64	CG6153
FBtr0080434	64	Sir2
FBtr0080439;FBtr0334752;FBtr0080440;FBtr0080441	64	Pect
FBtr0342906;FBtr0342905;FBtr0080511	64	ics
FBtr0080937	64	CG17996
FBtr0081161;FBtr0332577;FBtr0336628	64	l(2)37Cg
FBtr0330191;FBtr0302383;FBtr0081728	64	Zif
FBtr0082006	64	CG11985
FBtr0082048;FBtr0082047	64	CG9356
FBtr0082131	64	CG8417
FBtr0082570	64	GstD3
FBtr0334297;FBtr0082870	64	CG9922
FBtr0082943	64	CG31320
FBtr0083154	64	AOX1
FBtr0083213	64	Rbf2
FBtr0110910;FBtr0083295	64	Dhfr
FBtr0083428	64	CG3995
FBtr0083831	64	CG4936
FBtr0083835	64	mdlc
FBtr0084108	64	CG3353
FBtr0334664;FBtr0084112;FBtr0301211;FBtr0334663	64	CG7956
FBtr0334601;FBtr0334603;FBtr0084631;FBtr0084630;FBtr0334602;FBtr0273283;FBtr0273282	64	CG5746
FBtr0085245	64	Sce
FBtr0345227;FBtr0300259;FBtr0085321;FBtr0346765;FBtr0330333	64	fkh
FBtr0085409	64	Slbp
FBtr0335407;FBtr0085411	64	CG11882
FBtr0085413	64	CG14512
FBtr0085509	64	Cog7
FBtr0085863	64	nero
FBtr0086021;FBtr0086020;FBtr0086018	64	Ars2
FBtr0086231	64	CG11110
FBtr0086600;FBtr0331978	64	CG15107
FBtr0086675	64	GstE7
FBtr0340209;FBtr0086926	64	veil
FBtr0340220;FBtr0340219;FBtr0113090;FBtr0086946	64	MESR4
FBtr0114628;FBtr0087019;FBtr0340073;FBtr0114627	64	Ehbp1
FBtr0087249	64	CG8435
FBtr0087416;FBtr0087415;FBtr0111006;FBtr0305216;FBtr0305213;FBtr0305215;FBtr0305214	64	chn
FBtr0333063;FBtr0088018;FBtr0088017	64	CG8878
FBtr0088247	64	CG12343
FBtr0089069;FBtr0089067;FBtr0089065;FBtr0333670;FBtr0089063	64	CaMKI
FBtr0091651	64	CG33672
FBtr0333811;FBtr0330106;FBtr0333750;FBtr0330105;FBtr0300577;FBtr0112927	64	Trf2
FBtr0306095;FBtr0113138;FBtr0333570;FBtr0333571;FBtr0306534;FBtr0306094;FBtr0308202;FBtr0306096;FBtr0306533;FBtr0073339;FBtr0308201	64	Cip4
FBtr0300549;FBtr0300548;FBtr0300547;FBtr0299728;FBtr0300546;FBtr0335449;FBtr0299729	64	Csk
FBtr0299959	64	CG42360
FBtr0300597;FBtr0300596;FBtr0340016	64	ATPCL
FBtr0301426	64	KP78a
FBtr0301748;FBtr0331298;FBtr0331299	64	CG42593
FBtr0332540;FBtr0303236;FBtr0303235	64	CG6136
FBtr0306563;FBtr0306562;FBtr0306561;FBtr0306560;FBtr0306559	64	Ptpmeg
FBtr0310385	64	Su(var)3-9
FBtr0345898;FBtr0330268;FBtr0330264;FBtr0330266;FBtr0345897;FBtr0345896;FBtr0330261	64	CG43736
FBtr0339090;FBtr0339089;FBtr0339088;FBtr0339092;FBtr0339091;FBtr0339093	64	Glycogenin
FBtr0339160;FBtr0339161;FBtr0084937;FBtr0084936;FBtr0084935;FBtr0339162	64	Lnk
FBtr0344149;FBtr0342962;FBtr0070068;FBtr0070067;FBtr0070066	65	CG3777
FBtr0346168;FBtr0071403	65	CG3106
FBtr0346337;FBtr0346336;FBtr0071484	65	Ipod
FBtr0346593;FBtr0072761	65	CG13920
FBtr0100561;FBtr0340618;FBtr0340617;FBtr0310138;FBtr0073852;FBtr0310137;FBtr0310136;FBtr0073851;FBtr0301919;FBtr0301921;FBtr0301920;FBtr0345131;FBtr0073853	65	up
FBtr0074326	65	TwdlY
FBtr0076216;FBtr0334096;FBtr0113422;FBtr0344833	65	CG32082
FBtr0080557	65	CG16884
FBtr0080558	65	CG16885
FBtr0345641;FBtr0080699	65	yellow-c
FBtr0081611	65	CG10068
FBtr0083415	65	TwdlW
FBtr0085057	65	TwdlB
FBtr0085570	65	Bet5
FBtr0088344;FBtr0301965	65	CAP
FBtr0110801;FBtr0084390	65	CG4467
FBtr0339094;FBtr0339095	65	CG44245
FBtr0070063;FBtr0332992	66	G9a
FBtr0071638;FBtr0071637	66	CG4050
FBtr0072203;FBtr0072202	66	Phm
FBtr0075117	66	CG4306
FBtr0076706	66	CG13671
FBtr0080038	66	CG7456
FBtr0080313	66	CG6746
FBtr0308211;FBtr0082402	66	CG6744
FBtr0082998	66	CG33331
FBtr0083278	66	CG6126
FBtr0344118;FBtr0084911;FBtr0084910;FBtr0084909;FBtr0300820;FBtr0300819	66	SppL
FBtr0088923	66	CG2064
FBtr0345147;FBtr0333847;FBtr0333846;FBtr0290044	66	CG9449
FBtr0339087;FBtr0339086	66	CG44243
FBtr0070485	67	fs(1)Ya
FBtr0070851;FBtr0070850;FBtr0070852	67	Sirt4
FBtr0071130	67	l(1)G0193
FBtr0071146;FBtr0309795	67	dec-1
FBtr0072375	67	CG3589
FBtr0074509	67	Dhc16F
FBtr0075043;FBtr0332651;FBtr0075042;FBtr0075044;FBtr0075045	67	CG18135
FBtr0075697	67	gnu
FBtr0075777	67	Pex1
FBtr0100278;FBtr0076882	67	eco
FBtr0077083	67	Sras
FBtr0331813;FBtr0331815;FBtr0310652;FBtr0077235;FBtr0077234	67	CG32521
FBtr0077662	67	toc
FBtr0345738;FBtr0078025	67	Lsp1beta
FBtr0344265;FBtr0078686;FBtr0078687	67	Itp-r83A
FBtr0078823	67	CG12163
FBtr0078992	67	Marcal1
FBtr0343155;FBtr0079287	67	CG31637
FBtr0079511	67	Tep2
FBtr0339671;FBtr0079576	67	CG8668
FBtr0079637	67	SLC5A11
FBtr0079911	67	mtDNA-helicase
FBtr0081206	67	Rab9
FBtr0339181;FBtr0339180;FBtr0081740	67	Sp7
FBtr0082630;FBtr0082629;FBtr0082628;FBtr0082627;FBtr0082626	67	Desat1
FBtr0083083;FBtr0334588	67	ea
FBtr0084440	67	SPE
FBtr0084573	67	jnj
FBtr0339255;FBtr0084743	67	CG5805
FBtr0336663;FBtr0086110	67	sced
FBtr0086668	67	Idgf5
FBtr0086937;FBtr0086934;FBtr0086933;FBtr0086935	67	CG4847
FBtr0340022;FBtr0087140	67	CG30100
FBtr0087487	67	Sin1
FBtr0088024;FBtr0088025;FBtr0339582;FBtr0339583	67	Mppe
FBtr0113062;FBtr0088402;FBtr0088401;FBtr0088399	67	magu
FBtr0088611;FBtr0302512;FBtr0302511	67	CG8026
FBtr0088718;FBtr0088720;FBtr0088719	67	CG14767
FBtr0088889;FBtr0088888	67	CG12159
FBtr0089934;FBtr0089932	67	ltd
FBtr0339549;FBtr0339548;FBtr0089979	67	E23
FBtr0332047;FBtr0332045;FBtr0273241;FBtr0273240;FBtr0332048;FBtr0332046	67	Wbp2
FBtr0305911;FBtr0289953;FBtr0305910	67	alpha-Est10
FBtr0300519;FBtr0299648;FBtr0331843;FBtr0299645;FBtr0299646	67	Nedd4
FBtr0307887;FBtr0307888	67	CG32106
FBtr0339715;FBtr0339714	67	CG2943
FBtr0339824;FBtr0113453;FBtr0333145;FBtr0113452;FBtr0333144;FBtr0113455;FBtr0113454;FBtr0113451	67	CG33181
FBtr0344981;FBtr0076525;FBtr0344980	67	Tequila
FBtr0070751	68	Sas10
FBtr0339695;FBtr0071151	68	CG1575
FBtr0343367;FBtr0071332	68	mxc
FBtr0071905	68	Gmer
FBtr0071937	68	Cdk9
FBtr0343280;FBtr0072210	68	CG3735
FBtr0301625;FBtr0072781;FBtr0072779	68	Patj
FBtr0072791	68	CG2021
FBtr0073148	68	IntS10
FBtr0073270;FBtr0310531	68	Chd64
FBtr0073437;FBtr0330387	68	CG18292
FBtr0073519;FBtr0073518	68	rho-4
FBtr0343586;FBtr0073535	68	RPA3
FBtr0074441	68	Fim
FBtr0074602	68	fu
FBtr0074615	68	CG6617
FBtr0075632	68	Aats-gly
FBtr0333367;FBtr0076835	68	Neos
FBtr0332800;FBtr0076867	68	Rac2
FBtr0076952;FBtr0076950;FBtr0345025;FBtr0076951	68	velo
FBtr0077641	68	gammaTub23C
FBtr0332569;FBtr0077953	68	Atg4a
FBtr0080200	68	CG4751
FBtr0080342	68	crok
FBtr0080852	68	heix
FBtr0082163	68	Snap24
FBtr0083575	68	Dlc90F
FBtr0301165;FBtr0084502;FBtr0084501	68	CG5902
FBtr0084552	68	Apc2
FBtr0085608;FBtr0334707	68	CG7903
FBtr0085876;FBtr0085875	68	Map205
FBtr0344022;FBtr0085942;FBtr0085941	68	CycK
FBtr0340450;FBtr0100176;FBtr0086583;FBtr0086582;FBtr0100174;FBtr0086584;FBtr0114623	68	ena
FBtr0333168;FBtr0086833	68	Smurf
FBtr0087740;FBtr0087741;FBtr0333149	68	Dp
FBtr0088971	68	CG11123
FBtr0089905;FBtr0089901;FBtr0301521;FBtr0300562;FBtr0089904;FBtr0089900;FBtr0089902	68	Pten
FBtr0336976;FBtr0112992	68	CG9915
FBtr0300525;FBtr0334912;FBtr0334911;FBtr0299709;FBtr0334910	68	cno
FBtr0301967;FBtr0332654;FBtr0332653;FBtr0300786;FBtr0300785;FBtr0300784;FBtr0300783;FBtr0332652	68	fd68A
FBtr0071251	69	CG1789
FBtr0071774	69	ari-2
FBtr0071890	69	CG30272
FBtr0073729;FBtr0073728	69	CG32641;CG32640
FBtr0079924	69	Taf11
FBtr0081914	69	CG8202
FBtr0083216;FBtr0306244;FBtr0083215;FBtr0335424;FBtr0335423;FBtr0100595	69	srp
FBtr0337059;FBtr0083369;FBtr0083367	69	MESK4;CG31274
FBtr0084671	69	CG13625
FBtr0085906	69	tsh
FBtr0087366	69	CG11808
FBtr0332930;FBtr0100154;FBtr0087493;FBtr0332929	69	Asx
FBtr0339418;FBtr0088436;FBtr0339419;FBtr0339420;FBtr0088435;FBtr0330325	69	CG1407
FBtr0088635;FBtr0339277;FBtr0111043	69	sns
FBtr0332950;FBtr0301636;FBtr0114364;FBtr0114365	69	jing
FBtr0300998	69	CG4041
FBtr0333047;FBtr0303749;FBtr0303750;FBtr0330145	69	dikar
FBtr0304607;FBtr0304605;FBtr0304606;FBtr0304603;FBtr0304608;FBtr0304604	69	pros
FBtr0306010;FBtr0306009	69	ash1
FBtr0310148;FBtr0300369;FBtr0339285;FBtr0310147	69	CG13742
FBtr0332394;FBtr0332393	69	CG8028
FBtr0333880;FBtr0333881;FBtr0309120;FBtr0309119;FBtr0309117;FBtr0309118	69	Tet
FBtr0336649;FBtr0336651;FBtr0336650;FBtr0336652	69	Strn-Mlck
FBtr0345460;FBtr0346729;FBtr0346728;FBtr0345457;FBtr0345459;FBtr0345458	69	CG45263
FBtr0070432;FBtr0345598;FBtr0343589;FBtr0301515;FBtr0070433;FBtr0112843	70	ph-p;ph-d
FBtr0070687;FBtr0070686	70	rap
FBtr0071286	70	CG32708
FBtr0073256	70	VhaM9.7-c
FBtr0343381;FBtr0073979	70	CG9512
FBtr0074417	70	CG13001
FBtr0076541;FBtr0076539;FBtr0344979;FBtr0076540;FBtr0076538;FBtr0331858;FBtr0300462	70	bol
FBtr0077136	70	sinu
FBtr0078033;FBtr0078032;FBtr0078031	70	aru
FBtr0082062	70	Rlb1
FBtr0334684;FBtr0082155	70	FBXO11
FBtr0082256;FBtr0082255;FBtr0344145;FBtr0100455;FBtr0100454	70	hth
FBtr0082759	70	yellow-e3
FBtr0085860	70	Smvt
FBtr0086112;FBtr0086111;FBtr0086113;FBtr0330252	70	Adf1
FBtr0087346;FBtr0087344;FBtr0087343;FBtr0302330;FBtr0087345	70	fus
FBtr0336811;FBtr0336809	70	Cdep
