# Supplementary material for: The developmental proteome of Drosophila melanogaster
Source: HighWire-hosted journal article supplement (doi:10.1101/gr.213694.116), 2017-04-05
Supplement: Supplemental_Tables.zip [file Supplemental_Table_S13.xlsx]

## Sheet: Sheet 1
GOBPID	Pvalue	OddsRatio	ExpCount	Count	Size	Term	FDR	cluster	genes
GO:0045035	5.02029e-05	264.979	0.0109881	2	10	sensory organ precursor cell division	0.000753043	1	numb; Dref; l(2)gd1; CycE; IKKepsilon; scra; dap; Ehbp1; Diap1; CG31029
GO:0006820	0.000347984	27.058	0.142846	3	130	anion transport	0.00260988	1	CG3638; CG12773; Csat; w; NAAT1; Efr; CG1628; sesB; Ant2; CG10353; Clic; CG9413; CG9981; CG4301; Nprl2; CG16700; CG4991; CG12531; Pmp70; tty; Eaat2; VGlut; colt; CG3036; CG14040; Oatp26F; CG3476; Ndae1; Ntl; CG13384; Eaat1; Oatp30B; CG17139; Porin2; porin; JhI-21; Oatp33Ea; Oatp33Eb; CG31729; CG15279; Dic3; CG13743; CG8026; CG1698; polyph; Sln; CG8850; ClC-b; CG8785; CG42321; VGAT; Ih; NaPi-T; Pi…
GO:0098656	0.000897173	54.2222	0.0450514	2	41	anion transmembrane transport	0.00448587	1	CG12773; NAAT1; CG1628; CG9413; CG16700; CG4991; CG12531; CG13384; JhI-21; CG15279; Dic3; CG13743; CG1698; polyph; CG8850; CG8785; VGAT; NaPi-T; Picot; List; CG30394; kcc; CG1139; CG4476; path; CG32079; CG7888; Ncc69; mnd; CG7255; CG5535; CG13248; slif; CG31547; Dic1; CG7708; CG17119; CG13646; gb; CG1607; CG2316
GO:0042176	0.00172876	38.4	0.0626324	2	57	regulation of protein catabolic process	0.00648285	1	sgg; APC7; CkIalpha; REG; Usp2; Bub1; Fbw5; Rca1; Cks30A; l(2)gd1; CycE; Rpn3; Cdc23; Pomp; gus; BubR1; CG15237; CSN4; Cul4; Su(var)2-10; Mad1; TER94; Fbl6; Mtor; PI31; DUBAI; Fsn; mad2; Ufd1-like; CycA; rpr; Lon; Rpn1; SAK; Chro; ctrip; alphaTub84B; alphaTub85E; pic; CSN5; Mps1; Bdbt; Cdc16; Apc2; crb; Rpn2; Bub3; dco; rod; Spt6; cof; l(3)63Fd; E(lz); mat(2)cell-J; Best1; CG18508; CG34234
GO:0015711	0.00462597	22.8895	0.103289	2	94	organic anion transport	0.00876822	1	CG12773; Csat; w; NAAT1; Efr; CG1628; sesB; Ant2; CG9413; CG9981; CG4301; Nprl2; CG16700; CG4991; CG12531; Pmp70; Eaat2; VGlut; colt; CG14040; Oatp26F; CG3476; Ndae1; Ntl; CG13384; Eaat1; Oatp30B; JhI-21; Oatp33Ea; Oatp33Eb; CG31729; CG15279; CG13743; CG8026; CG1698; polyph; Sln; CG8850; CG8785; CG42321; VGAT; Ih; List; CG30394; Oatp58Da; Oatp58Db; Oatp58Dc; CG44252; CG5549; kcc; Tpc2; CG1139; CG…
GO:0008356	0.00501766	21.9288	0.107684	2	98	asymmetric cell division	0.00876822	1	N; pon; ric8a; dlg1; Gbeta13F; eas; baz; par-6; Cdc42; l(2)gl; AP-2alpha; eIF-4a; alien; numb; pelo; Dref; Cdk1; aurB; piwi; aub; l(2)gd1; loqs; Su(H); esg; wor; sna; CycE; Nak; brat; IKKepsilon; Incenp; scra; CSN7; ana2; Ggamma1; shrb; dap; Galphao; cnn; mam; clu; wcd; Ehbp1; stau; Ote; hts; insc; shg; egg; zip; pUf68; Iml1; Dhc64C; Myt1; Galphai; dally; orb2; CycA; Cep135; Diap1; CSN1b; CSN3; a…
GO:0015780	0.00548287	244.673	0.00549407	1	5	nucleotide-sugar transport	0.00876822	1	Csat; Efr; CG14040; frc; nac
GO:0046957	0.00548287	244.673	0.00549407	1	5	negative phototaxis	0.00876822	1	Ptth; tim; tor; TrpA1; Gr22e
GO:0052129	0.00548287	244.673	0.00549407	1	5	negative energy taxis	0.00876822	1	Ptth; tim; tor; TrpA1; Gr22e
GO:0008593	0.00584548	20.2292	0.116474	2	106	regulation of Notch signaling pathway	0.00876822	1	dor; Rbcn-3B; Tsp3A; N; Myc; Rala; VhaAC39-1; Rbcn-3A; dx; pigs; CG10777; Traf6; dsh; Smr; Brms1; Chc; Vps4; CoRest; car; l(2)gl; smo; al; ebi; Su(dx); insv; Hrs; aph-1; alpha4GT1; Tsp26A; ihog; uif; numb; Utx; l(2)gd1; bun; Uvrag; Arpc1; lace; EndoGI; Dap160; Nipped-A; ACC; Hey; Vps25; shrb; Caf1-105; stan; O-fut1; phyl; Ehbp1; insb; Fkbp14; Rtf1; Vps20; Nurf-38; Eps-15; Hipk; Usp10; lqf; Arp3; …
GO:0006688	0.00766819	163.09	0.0076917	1	7	glycosphingolipid biosynthetic process	0.00984906	1	brn; alpha4GT1; GlcAT-S; beta4GalNAcTA; GlcAT-P; alpha4GT2; beta4GalNAcTB
GO:1900087	0.00875918	139.78	0.00879052	1	8	positive regulation of G1/S transition of mitotic cell cycle	0.00984906	1	CDC45L; N; Psf2; Su(H); CycE; Psf1; Sld5; ci
GO:1902808	0.00875918	139.78	0.00879052	1	8	positive regulation of cell cycle G1/S phase transition	0.00984906	1	CDC45L; N; Psf2; Su(H); CycE; Psf1; Sld5; ci
GO:0006811	0.00961834	8.13163	0.457107	3	416	ion transport	0.00984906	1	CG3638; CG12773; Nmdar2; inc; Vha36-3; brv3; Csat; w; VhaAC39-1; CG6927; SK; NAAT1; Ca-alpha1T; Efr; Ctr1A; iav; nAChRalpha3; Ir8a; ATPsyndelta; Hk; CG1628; sesB; Ant2; Ork1; rtv; CG43155; ATP7; CG10353; cac; CG15719; Fer3HCH; Clic; CG9413; eag; CG9065; Cngl; CG8916; Lcch3; Stim; CG4239; CG9981; CG4301; para; ppk28; Nprl2; CG16700; CG4991; ppk23; Ucp4A; Sh; Tsf1; nAChRalpha7; CG12531; Pmp70; tty;…
GO:0006687	0.00984906	122.298	0.00988933	1	9	glycosphingolipid metabolic process	0.00984906	1	brn; alpha4GT1; GlcAT-S; CG5731; beta4GalNAcTA; CG7997; GlcAT-P; alpha4GT2; beta4GalNAcTB
GO:0035150	5.12108e-08	65.9792	0.103995	5	53	regulation of tube size	3.07265e-06	2	pck; Fas2; sqh; Nrg; rtv; dsh; Chc; wus; cold; ds; Sec24CD; dpp; bark; ft; mmy; nrv2; crok; Gli; vari; kune; EcR; stan; garz; Lac; conv; Rho1; grh; fj; sano; cora; Mmp1; zip; crim; Nrx-IV; verm; serp; knrl; kni; CG8121; CG7713; tnc; gammaCOP; Ran; rex; ru; cathD; gg; stout; l(3)06664; l(1)1Ac; l(2)Ta; Src64B; Dsp1
GO:0035152	3.88706e-07	42.7095	0.155011	5	79	regulation of tube architecture, open tracheal system	1.16612e-05	2	DAAM; pck; Fas2; peb; sqh; bou; Nrg; Moe; Zpr1; rtv; dsh; mew; Chc; if; wus; cold; ds; Sec24CD; dpp; bark; ft; mmy; nrv2; uif; crok; Gli; IKKepsilon; vari; Mtp; kune; Syb; stan; garz; Lac; shot; conv; Rho1; grh; fj; sano; cora; shg; Egfr; Mmp1; zip; klar; rho; Blimp-1; rhea; crim; Nrx-IV; Mkp3; verm; serp; knrl; kni; Sec23; CG8121; wkd; cv-c; CG7713; bnl; wat; gammaCOP; awd; Ran; ru; Esm; cathD; …
GO:0048731	1.56218e-06	7.31198	4.91131	16	2503	system development	3.12435e-05	2	G9a; CG13377; ewg; ac; sc; l(1)sc; pcl; ase; CG18273; svr; elav; Appl; vnd; CG13366; Dredd; Roc1a; SkpA; sdk; tw; MED22; CG3703; CDC45L; CG11382; CG11398; CG3638; DAAM; CG11417; CG11448; pck; rush; trr; arm; usp; moody; CG4061; CG16903; Unc-76; ph-p; pn; Nmd3; Vinc; kz; crn; temp; Raf; PsGEF; gt; boi; egh; PI4KIIIalpha; sgg; rst; kirre; N; dnc; Myc; CG2875; Mnt; Rala; fd3F; CG2901; ec; VhaAC39-1;…
GO:0035151	2.3013e-06	53.6339	0.0961463	4	49	regulation of tube size, open tracheal system	3.45196e-05	2	pck; Fas2; sqh; Nrg; rtv; dsh; Chc; wus; cold; ds; Sec24CD; dpp; bark; ft; mmy; nrv2; crok; Gli; vari; kune; stan; garz; Lac; conv; Rho1; grh; fj; sano; cora; Mmp1; zip; crim; Nrx-IV; verm; serp; knrl; kni; CG8121; CG7713; gammaCOP; Ran; cathD; gg; stout; l(3)06664; l(1)1Ac; l(2)Ta; Src64B; Dsp1
GO:0007399	4.21549e-06	7.11647	3.32195	13	1693	nervous system development	5.05858e-05	2	G9a; CG13377; ewg; ac; sc; l(1)sc; pcl; ase; CG18273; elav; Appl; vnd; Dredd; Roc1a; SkpA; sdk; MED22; CG3703; CDC45L; CG11398; CG3638; DAAM; CG11417; CG11448; pck; rush; arm; usp; moody; CG4061; CG16903; Unc-76; ph-p; Nmd3; Vinc; kz; crn; Raf; PsGEF; gt; boi; egh; PI4KIIIalpha; sgg; rst; N; dnc; Myc; CG2875; Mnt; Rala; fd3F; CG2901; Vap-33A; lva; cib; Tip60; Fas2; CG3527; peb; pon; ctp; Ptp4E; o…
GO:0007424	5.37424e-06	16.9185	0.468958	6	239	open tracheal system development	5.37424e-05	2	DAAM; pck; arm; Raf; N; VhaAC39-1; Fas2; peb; Ptp4E; sqh; Rbcn-3A; bou; Trf2; Nrg; Moe; Zpr1; rtv; dsh; hop; Ptp10D; mew; Chc; if; wus; baz; par-6; Vav; dome; Cdc42; Spp; cold; ds; S; aop; Sec24CD; dpp; Hrs; colt; Mad; Sec5; bark; ed; ft; tkv; vri; Lam; Hsp60C; mmy; nrv2; uif; wg; Btk29A; ppk11; Stam; salm; crok; Sos; elB; noc; esg; Gli; Mhc; spi; Hakai; barr; IKKepsilon; dia; vari; Mtp; kune; Sr…
GO:0060541	7.62338e-06	15.8761	0.498391	6	254	respiratory system development	6.53433e-05	2	DAAM; pck; arm; Raf; N; VhaAC39-1; Fas2; peb; Ptp4E; sqh; Rbcn-3A; bou; Trf2; Nrg; Moe; Zpr1; rtv; dsh; hop; Ptp10D; mew; Chc; if; wus; baz; par-6; Wnt5; Vav; dome; Cdc42; Spp; cold; ds; S; aop; Sec24CD; dpp; Hrs; colt; Mad; Sec5; bark; ed; ft; tkv; vri; Lam; Hsp60C; mmy; nrv2; uif; wg; Btk29A; ppk11; Stam; salm; crok; Sos; elB; noc; esg; Gli; Mhc; spi; Hakai; barr; IKKepsilon; dia; vari; Mtp; ku…
GO:0007426	1.49182e-05	78.6818	0.0490542	3	25	tracheal outgrowth, open tracheal system	0.000111887	2	mew; if; Sos; unpg; Mmp2; cnk; aft; grh; Rac1; sty; Rac2; RasGAP1; btl; ksr; Ras85D; Timp; stumps; bnl; pnt; Ubc7; mdl; l(1)M120.1; ru; Esm; l(2)Ta
GO:0042254	2.09712e-05	29.7119	0.166784	4	85	ribosome biogenesis	0.000139808	2	Ns3; sta; Nmd3; CG3071; CG2875; CG3527; RpL7A; RpS6; CG1789; RpS28b; CG2972; Rtc1; CG15916; CG8939; mRpL10; dbe; RpS21; nop5; emb; CG13097; CG4364; CG6724; CG6712; CG10341; Ns4; Tif-IA; Mys45A; CG1671; RpLP0-like; CG7637; CG7686; CG13185; CG8545; CG8414; wcd; Ns2; CG5033; CG10914; RpS18; CG4038; Fib; eIF6; Nop60B; CG8549; CG8038; RpS17; CG12301; CG7728; mTerf3; Tsr1; RpLP0; Ddx1; mtTFB2; RpL24-li…
GO:0044767	2.77436e-05	5.77423	7.7231	18	3936	single-organism developmental process	0.000166462	2	G9a; CG13377; cin; ewg; y; ac; sc; l(1)sc; pcl; ase; CG18273; svr; elav; Appl; vnd; CG13366; Dredd; Roc1a; SkpA; sdk; CG5254; RpL22; tw; Rbf; MED22; CG3703; CG3690; CDC45L; CG14624; CG11382; CG11398; CG3638; DAAM; CG11417; CG11448; Ns3; pck; rush; dor; hfw; a6; Scgdelta; trr; arm; mip130; Edem1; Hr4; usp; Actn; moody; CG4061; CG16903; Unc-76; ph-p; pn; Nmd3; Vinc; pcx; kz; crn; temp; Ilp6; Raf; P…
GO:0032502	3.25839e-05	5.68571	7.80551	18	3978	developmental process	0.000173483	2	G9a; CG13377; cin; ewg; y; ac; sc; l(1)sc; pcl; ase; CG18273; svr; elav; Appl; vnd; CG13366; Dredd; Roc1a; SkpA; sdk; CG5254; RpL22; tw; Rbf; MED22; CG3703; CG3690; CDC45L; CG14624; CG11382; CG11398; CG3638; DAAM; CG11417; CG11448; Ns3; pck; rush; dor; hfw; a6; Scgdelta; Pgam5; trr; arm; mip130; Edem1; Hr4; usp; Actn; moody; CG4061; CG16903; Unc-76; ph-p; pn; Nmd3; Vinc; pcx; kz; crn; temp; Ilp6;…
GO:0090066	3.46966e-05	16.3073	0.386547	5	197	regulation of anatomical structure size	0.000173483	2	Rbf; DAAM; pck; PsGEF; gt; Myc; Fas2; spoon; sqh; Nrg; Erk7; Lst8; rtv; dsh; bif; lic; Chc; Myb; Arp2; mbt; Nprl2; wus; Arpc3B; RhoGAPp190; upd1; Wnt5; Hs3st-B; rictor; Cdc42; vfl; pico; Pi3K21B; RpI135; cold; ds; cpb; Sec24CD; dpp; Arpc5; lilli; Thor; bark; capu; ft; Arpc4; mmy; nrv2; wg; Wnt6; Rack1; Btk29A; Sema-1a; bib; SCAR; ab; crok; aret; kuz; p38b; Arpc1; CycE; Gli; GMF; Syx5; CadN; Lar; …
GO:0044707	3.77662e-05	5.47171	7.01279	17	3574	single-multicellular organism process	0.000174306	2	G9a; CG13377; cin; ewg; y; ac; sc; l(1)sc; pcl; ase; CG18273; svr; elav; Appl; vnd; CG13366; Dredd; Roc1a; SkpA; sdk; RpL22; tw; MED22; CG3703; CDC45L; CG11382; CG11398; CG3638; DAAM; CG11417; CG11448; Ns3; pck; Rab27; rush; Nmdar2; inc; dor; hfw; a6; Adar; trr; arm; Edem1; Hr4; usp; Actn; moody; CG4061; CG16903; Unc-76; ph-p; pn; Nmd3; Vinc; kz; crn; temp; Ilp6; Raf; PsGEF; gt; boi; Pdfr; egh; T…
GO:0007275	5.15096e-05	5.24934	6.34369	16	3233	multicellular organism development	0.000220756	2	G9a; CG13377; cin; ewg; y; ac; sc; l(1)sc; pcl; ase; CG18273; svr; elav; Appl; vnd; CG13366; Dredd; Roc1a; SkpA; sdk; tw; MED22; CG3703; CDC45L; CG11382; CG11398; CG3638; DAAM; CG11417; CG11448; pck; rush; dor; hfw; a6; trr; arm; Edem1; Hr4; usp; moody; CG4061; CG16903; Unc-76; ph-p; pn; Nmd3; Vinc; kz; crn; temp; Raf; PsGEF; gt; boi; egh; PI4KIIIalpha; sgg; per; CG2681; crm; rst; kirre; N; dnc; …
GO:0022613	0.000107588	19.1863	0.25312	4	129	ribonucleoprotein complex biogenesis	0.000411573	2	Ns3; sta; Nmd3; CG3071; CG2875; CG3527; RpL7A; CG3198; RpS6; CG1789; RpS28b; CG2972; Rbp1-like; Rtc1; CG15916; CG8939; U2af50; eIF-2alpha; pcm; mRpL10; dbe; RpS21; mxt; nop5; x16; r2d2; CG7102; emb; CG13097; CG4364; Srp54; me31B; CG6724; aub; Ge-1; CG6712; CG10341; Ns4; Tif-IA; Mys45A; CG1671; RpLP0-like; CG7637; CG7686; CG13185; CG8545; AGO1; tra2; CG8414; wcd; Ns2; Dcr-2; icln; HPS4; CG5033; st…
GO:0032501	0.000109753	5.25218	9.42234	19	4802	multicellular organismal process	0.000411573	2	G9a; CG13377; cin; ewg; Or1a; y; ac; sc; l(1)sc; pcl; ase; CG18273; svr; elav; Appl; vnd; CG13366; Dredd; Roc1a; SkpA; sdk; CG5254; RpL22; tw; Rbf; CG11664; CG3711; MED22; TRAM; CG3703; CG11638; CDC45L; CG11382; CG11398; CG3638; DAAM; CG11417; CG11448; Gr2a; Ns3; pck; Rab27; rush; Nmdar2; inc; dor; CG3740; hfw; a6; Scgdelta; Adar; Vps26; CG14818; trr; arm; mip130; Edem1; Hr4; usp; Actn; moody; CG…
GO:0002121	0.000191765	31.3909	0.113806	3	58	inter-male aggressive behavior	0.000676819	2	CG13377; CG3638; Syx4; Act5C; Tbh; CkIalpha; ade5; l(1)G0007; CG32572; ppk23; CG42684; Bx; CG43759; Bacc; ed; Rtnl1; CG9171; Nlg2; RapGAP1; aret; Tehao; noc; CG17323; CG8963; CG14478; 5-HT1A; Fkbp14; twz; Gp150; px; Sesn; ppk29; emc; RhoGEF64C; lama; LanA; sgl; Rdl; CG6175; CG5946; siz; TfAP-2; neur; eca; TkR86C; Tk; l(3)L1231; pxb; Ktl; ND-20L; Obp99d; tll; SF1; l(3)04053; l(3)07882; l(2)Ta; CG4…
GO:0048856	0.000207854	4.53328	7.05989	16	3598	anatomical structure development	0.000688693	2	G9a; CG13377; cin; ewg; y; ac; sc; l(1)sc; pcl; ase; CG18273; svr; elav; Appl; vnd; CG13366; Dredd; Roc1a; SkpA; sdk; CG5254; tw; Rbf; MED22; CG3703; CDC45L; CG11382; CG11398; CG3638; DAAM; CG11417; CG11448; pck; rush; dor; a6; Scgdelta; Pgam5; trr; arm; mip130; Hr4; usp; Actn; moody; CG4061; CG16903; Unc-76; ph-p; pn; Nmd3; Vinc; kz; crn; temp; Raf; PsGEF; gt; boi; egh; Tsp3A; PI4KIIIalpha; sgg;…
GO:0002118	0.000222806	29.7602	0.119692	3	61	aggressive behavior	0.000688693	2	CG13377; CG3638; Syx4; Act5C; Tbh; CkIalpha; ade5; l(1)G0007; CG32572; ppk23; CG42684; Bx; CG43759; Bacc; ed; Rtnl1; CG9171; Nlg2; RapGAP1; aret; Tehao; noc; CG17323; Cyp6a20; CG8963; CG14478; 5-HT1A; Fkbp14; twz; Gp150; px; Sesn; ppk29; emc; RhoGEF64C; lama; LanA; sgl; Rac2; Rdl; CG6175; CG5946; siz; TfAP-2; neur; eca; TkR86C; Tk; l(3)L1231; pxb; fru; Ktl; ND-20L; Obp99d; tll; SF1; l(3)04053; l(…
GO:0022008	0.000235582	5.20406	2.85299	10	1454	neurogenesis	0.000688693	2	G9a; ac; sc; l(1)sc; pcl; ase; CG18273; Appl; vnd; Dredd; Roc1a; SkpA; sdk; MED22; CG3703; CDC45L; CG11398; DAAM; CG11417; CG11448; pck; rush; arm; usp; moody; CG4061; CG16903; Unc-76; ph-p; Nmd3; Vinc; kz; crn; Raf; gt; boi; egh; rst; N; dnc; Myc; CG2875; Mnt; Rala; fd3F; CG2901; lva; Fas2; CG3527; peb; pon; ctp; Ptp4E; ovo; Sas10; Mcm3; GAA1; raptor; sqh; Spx; Rpt4; CG3224; shf; pod1; Nf-YC; cm…
GO:0061343	0.000241043	110.487	0.023546	2	12	cell adhesion involved in heart morphogenesis	0.000688693	2	Nrg; Gbeta13F; nrv2; Gli; Ggamma1; Galphao; Lac; cora; Nrx-IV; Cont; prc; l(3)06664
GO:0048754	0.000379107	24.6351	0.143238	3	73	branching morphogenesis of an epithelial tube	0.000917029	2	arm; Raf; VhaAC39-1; Zpr1; baz; par-6; Cdc42; dpp; Sec5; ed; Lam; wg; esg; Syx7; shot; Rho1; grh; shg; apt; bs; sty; ago; Membrin; sfl; sgl; foi; rhea; trn; caps; btl; TSG101; Mkp3; Hph; pyd; Ras85D; dmt; wkd; mbo; Nsf2; stumps; put; Cctgamma; GckIII; bnl; Hs6st; dnd; VhaAC39-2; pnt; dysf; Vha100-1; hdc; wts; gammaCOP; e(r); tlr-2; ru; Nckx30C; cv-2; stout; Reph; l(2)k06107; l(2)Ta; Gr98c; CG3202…
GO:0060446	0.000379107	24.6351	0.143238	3	73	branching involved in open tracheal system development	0.000917029	2	arm; Raf; VhaAC39-1; Zpr1; baz; par-6; Cdc42; dpp; Sec5; ed; Lam; wg; esg; Syx7; shot; Rho1; grh; shg; apt; bs; sty; ago; Membrin; sfl; sgl; foi; rhea; trn; caps; btl; TSG101; Mkp3; Hph; pyd; Ras85D; dmt; wkd; mbo; Nsf2; stumps; put; Cctgamma; GckIII; bnl; Hs6st; dnd; VhaAC39-2; pnt; dysf; Vha100-1; hdc; wts; gammaCOP; e(r); tlr-2; ru; Nckx30C; cv-2; stout; Reph; l(2)k06107; l(2)Ta; Gr98c; CG3202…
GO:0061138	0.000379107	24.6351	0.143238	3	73	morphogenesis of a branching epithelium	0.000917029	2	arm; Raf; VhaAC39-1; Zpr1; baz; par-6; Cdc42; dpp; Sec5; ed; Lam; wg; esg; Syx7; shot; Rho1; grh; shg; apt; bs; sty; ago; Membrin; sfl; sgl; foi; rhea; trn; caps; btl; TSG101; Mkp3; Hph; pyd; Ras85D; dmt; wkd; mbo; Nsf2; stumps; put; Cctgamma; GckIII; bnl; Hs6st; dnd; VhaAC39-2; pnt; dysf; Vha100-1; hdc; wts; gammaCOP; e(r); tlr-2; ru; Nckx30C; cv-2; stout; Reph; l(2)k06107; l(2)Ta; Gr98c; CG3202…
GO:0035296	0.000382095	84.9699	0.0294325	2	15	regulation of tube diameter	0.000917029	2	Fas2; rtv; Sec24CD; dpp; nrv2; EcR; garz; tnc; gammaCOP; rex; ru; cathD; stout; l(1)1Ac; Src64B
GO:0001763	0.000426844	23.6171	0.149125	3	76	morphogenesis of a branching structure	0.000985025	2	arm; Raf; VhaAC39-1; Zpr1; baz; par-6; Cdc42; dpp; Sec5; ed; tkv; Lam; wg; esg; Syx7; shot; Rho1; grh; shg; apt; bs; rho; sty; ago; Membrin; sfl; sgl; foi; rhea; trn; caps; btl; TSG101; Mkp3; Hph; hb; pyd; Ras85D; dmt; wkd; mbo; Nsf2; stumps; put; Cctgamma; GckIII; bnl; Hs6st; dnd; VhaAC39-2; pnt; dysf; Vha100-1; hdc; wts; gammaCOP; e(r); tlr-2; ru; Nckx30C; cv-2; stout; Reph; l(2)k06107; l(2)Ta;…
GO:0007428	0.000493715	73.629	0.0333569	2	17	primary branching, open tracheal system	0.00109714	2	Raf; grh; apt; sfl; sgl; btl; Mkp3; Ras85D; dmt; stumps; put; bnl; Hs6st; pnt; ru; cv-2; CG42456
GO:0008362	0.000687265	61.343	0.0392434	2	20	chitin-based embryonic cuticle biosynthetic process	0.00147271	2	rtv; pot; mmy; EcR; grh; cora; pio; ecd; puc; Akt1; Apc2; Doa; gammaCOP; bon; Dk; stout; l(1)1Ac; CG33003; anon-82Aa; 3R-168-17
GO:0044085	0.000740089	5.13241	2.11129	8	1076	cellular component biogenesis	0.00153122	2	ewg; CG13366; SkpA; tw; Rbf; CG3708; DAAM; Ns3; pck; sta; inc; dor; Scgdelta; arm; mip130; Ocrl; Actn; moody; Nmd3; CG3071; PsGEF; Klp3A; PI4KIIIalpha; sgg; kirre; N; CG2875; Vap-33A; Fas2; CG15571; Femcoat; Muc4B; CG3527; ctp; Bteb2; Mcm3; spoon; GAA1; raptor; sqh; Top3beta; swa; RpL7A; Pat1; Cdc7; CG3198; Mcm6; C3G; bou; nullo; Hira; dec-1; RpS6; sn; Cp36; Cp38; Nrg; Crag; Caf1-180; CG1789; Moe…
GO:0008360	0.00139003	15.4853	0.223687	3	114	regulation of cell shape	0.00278006	2	arm; Fas2; nullo; Dok; dsh; hop; Drak; Rab40; mei-41; AnxB11; if; par-6; upd1; Vav; Cdc42; fog; l(2)gl; CG4629; Sec24CD; ed; His3.3A; Arpc4; PDZ-GEF; wg; CG7115; Pvr; SCAR; Sos; CycE; CG5790; Lar; Arpc2; Fs(2)Ket; dia; Ggamma1; sqa; Mp20; drk; Rho1; RhoGEF2; grh; ena; Fak; Vrp1; Cdk9; CG7028; Rac1; alpha-Spec; Rap1; Hsp83; dyl; CG10163; RhoGEF4; Rac2; pbl; rhea; CycT; CG7497; CG42674; zye; Pitslr…
GO:0048869	0.00169953	3.64952	5.06043	12	2579	cellular developmental process	0.00328941	2	G9a; ac; sc; l(1)sc; pcl; ase; CG18273; Appl; vnd; CG13366; Dredd; Roc1a; SkpA; sdk; CG5254; tw; Rbf; MED22; CG3703; CG3690; CDC45L; CG14624; CG11398; DAAM; CG11417; CG11448; pck; rush; dor; Scgdelta; arm; mip130; usp; Actn; moody; CG4061; CG16903; Unc-76; ph-p; Nmd3; Vinc; pcx; kz; crn; Raf; gt; boi; egh; Tsp3A; PI4KIIIalpha; sgg; fs(1)Yb; rst; kirre; N; dnc; Myc; CG2875; Mnt; Rala; fd3F; CG2901…
GO:0071840	0.00178752	3.55182	5.85708	13	2985	cellular component organization or biogenesis	0.00335161	2	G9a; ewg; pcl; ase; CG17778; Appl; CG13366; Hmt4-20; SkpA; RpL22; tw; Rbf; Sec22; MED22; CG3708; TRAM; mus81; CG3703; CDC45L; CG11398; DAAM; CG11412; CG11448; Lrpprc2; Ns3; pck; mei-38; rush; sta; inc; dor; CG14798; Scgdelta; Pex5; Pgam5; Vps26; trr; arm; mip130; Ocrl; usp; Actn; moody; CG4061; ph-p; wapl; pn; Nmd3; Vinc; pcx; crn; CG3071; PsGEF; gt; z; egh; Klp3A; eIF3ga; PI4KIIIalpha; sgg; fs(1…
GO:0019991	0.00188027	35.582	0.0647516	2	33	septate junction assembly	0.00341867	2	pck; moody; bou; Nrg; dlg1; l(2)gl; cold; nrv2; wol; crok; Gli; vari; kune; wun; Galphao; Lac; cora; Galphai; crim; Nrx-IV; Tsf2; Ssk; Cont; CG8121; GckIII; CG7713; loco; mesh; hty; Ran; ear; l(3)06664; Src64B
GO:0003007	0.00211378	33.4203	0.0686759	2	35	heart morphogenesis	0.00361261	2	arm; Nrg; dsh; sd; Gbeta13F; slp1; nrv2; wg; LanB1; Acer; kuz; p38b; Gli; Ggamma1; eve; Galphao; Lac; mam; sli; Sod2; cora; shg; robo1; yki; Nrx-IV; Cat; Cont; hh; p38a; ci; prc; mdl; l(3)06664; CG31029; vtd
GO:0035159	0.00211378	33.4203	0.0686759	2	35	regulation of tube length, open tracheal system	0.00361261	2	Fas2; sqh; rtv; dsh; Chc; wus; ds; Sec24CD; dpp; bark; ft; nrv2; vari; kune; stan; garz; conv; Rho1; grh; fj; sano; Mmp1; zip; verm; serp; CG8121; CG7713; gammaCOP; Ran; cathD; gg; stout; l(1)1Ac; Src64B; Dsp1
GO:0007417	0.00216756	8.39851	0.56118	4	286	central nervous system development	0.00361261	2	CG13377; ewg; ac; sc; l(1)sc; ase; elav; Appl; vnd; CG3638; DAAM; usp; moody; ph-p; crn; PsGEF; N; cib; Fas2; Ptp4E; Rnp4F; Act5C; sws; Smox; Nrg; oc; Ptp10D; CkIIbeta; Ten-a; CG12717; exd; vap; disco; eas; mbt; CG32572; if; RhoGAPp190; mnb; Ulp1; Vav; Tao; run; Npc1b; mbm; robo3; chinmo; CG17221; Mad; gkt; ed; mid; Lam; chic; mmy; eya; smt3; wg; Pvr; Sema-1a; PrBP; C1GalTA; numb; Ror; ab; Ced-12…
GO:0002009	0.00235101	5.25367	1.4265	6	727	morphogenesis of an epithelium	0.00376571	2	ewg; ac; l(1)sc; pcl; ase; svr; CG13366; CG11382; arm; ph-p; crn; Raf; boi; egh; sgg; N; Myc; Rala; ec; VhaAC39-1; brn; Fas2; bi; peb; ctp; ovo; spoon; RhoGAP5A; CG5966; rux; sqh; dx; Atx-1; Inx2; nullo; brk; Dok; sn; fs(1)h; Smox; Traf6; Nrg; oc; Lim1; Moe; Zpr1; btd; Sp1; CG15312; CG15309; Myo10A; sev; dsh; hop; dlg1; Drak; bif; dy; Karl; pot; fw; Mks1; CG43921; LIMK1; Smr; ade5; CG12717; hep; …
GO:0044763	0.00238495	3.69669	11.5493	19	5886	single-organism cellular process	0.00376571	2	CG3038; G9a; ewg; CG13375; y; ac; sc; l(1)sc; pcl; ase; CG18273; CG3156; CG17896; CG17778; Appl; vnd; CG13366; Dredd; Roc1a; Hmt4-20; SkpA; sdk; CG5254; RpL22; fz3; tw; Rbf; Sec22; MED22; TRAM; mus81; CG3703; CG3699; CG3690; CDC45L; CG14624; CG11398; CG11403; DAAM; CG11412; CG12773; CG11417; png; CG11448; Lrpprc2; Ns3; O-fut2; pck; Rab27; mei-38; rush; sta; Nmdar2; dor; hfw; CG14798; Scgdelta; Ad…
GO:0048729	0.0026244	5.13276	1.45789	6	743	tissue morphogenesis	0.00403754	2	ewg; ac; l(1)sc; pcl; ase; svr; CG13366; CG11382; arm; ph-p; crn; Raf; boi; egh; sgg; N; Myc; Rala; ec; VhaAC39-1; brn; Fas2; bi; peb; ctp; ovo; spoon; RhoGAP5A; CG5966; rux; sqh; dx; Atx-1; Inx2; nullo; brk; Dok; sn; fs(1)h; Smox; Traf6; Nrg; oc; Lim1; Moe; Zpr1; btd; Sp1; CG15312; CG15309; Myo10A; sev; dsh; hop; dlg1; Drak; bif; dy; Karl; pot; fw; Mks1; CG43921; LIMK1; Smr; ade5; CG12717; hep; …
GO:0043297	0.00317732	26.8823	0.0843733	2	43	apical junction assembly	0.00476598	2	pck; arm; moody; bou; Nrg; dlg1; baz; par-6; l(2)gl; cold; nrv2; wol; crok; Gli; vari; kune; wun; Galphao; Lac; cora; shg; kst; Galphai; crim; Nrx-IV; Tsf2; Ssk; Cont; CG8121; GckIII; CG7713; loco; crb; mesh; hty; Ran; nate; ear; sie; l(3)06664; l(2)k06107; Src64B; CG33506
GO:0008258	0.00394527	23.9509	0.0941841	2	48	head involution	0.00577357	2	peb; ush; Sec61alpha; Rab30; Btk29A; tup; Hakai; barr; tsh; EcR; wal; fas; POSH; thr; ena; shg; zip; emc; Rac1; ecd; spo; Rac2; Dronc; scyl; chrb; shd; hid; stck; pyd; pum; yrt; cv-c; put; srp; Apc2; Mtl; Ran; br; Cnx99A; ru; scg; Dk; ny; Su(S); pel; cr-b; E(br)187; 3R-69-15
GO:0022604	0.00418476	10.3727	0.329644	3	168	regulation of cell morphogenesis	0.00597822	2	G9a; DAAM; arm; Rala; lva; Fas2; nullo; Dok; Ppt1; Dlic; dsh; hop; Drak; bif; Rab40; LIMK1; NetA; NetB; Efhc1.1; mei-41; AnxB11; if; RhoGAPp190; par-6; upd1; Wnt5; Vav; Cdc42; fog; l(2)gl; CG4629; Sec24CD; ed; Elp3; His3.3A; Arpc4; PDZ-GEF; wg; CG7115; Pvr; Sema-1a; porin; SCAR; kuz; Sos; CycE; CadN; CG5790; ham; Lar; Arpc2; Fs(2)Ket; dia; Dscam1; Ggamma1; Vang; sqa; eve; stan; Mp20; drk; shot; H…
GO:0030154	0.00437546	3.26749	4.85833	11	2476	cell differentiation	0.00605919	2	G9a; ac; sc; l(1)sc; pcl; ase; CG18273; Appl; vnd; CG13366; Dredd; Roc1a; SkpA; sdk; CG5254; tw; Rbf; MED22; CG3703; CG3690; CDC45L; CG14624; CG11398; DAAM; CG11417; CG11448; pck; rush; dor; Scgdelta; arm; mip130; usp; Actn; moody; CG4061; CG16903; Unc-76; ph-p; Nmd3; Vinc; pcx; kz; crn; Raf; gt; boi; egh; Tsp3A; PI4KIIIalpha; sgg; fs(1)Yb; rst; kirre; N; dnc; Myc; CG2875; Mnt; Rala; fd3F; CG2901…
GO:0007043	0.00444341	22.4791	0.100071	2	51	cell-cell junction assembly	0.00605919	2	pck; arm; moody; kirre; Bteb2; bou; nullo; Nrg; dlg1; baz; par-6; shakB; l(2)gl; cold; bark; nrv2; wol; crok; Gli; vari; kune; wun; Galphao; Lac; cora; shg; kst; Galphai; crim; Nrx-IV; Tsf2; Ssk; Cont; pyd; CG8121; GckIII; CG7713; loco; crb; mesh; hty; Ran; rasp; nate; ear; sie; l(3)06664; l(2)k06107; Src64B; Su(Gl)27; CG33506
GO:0010631	0.00484192	9.82915	0.347304	3	177	epithelial cell migration	0.00627903	2	dor; usp; Raf; egh; Tsp3A; N; Rala; brn; spoon; sqh; Dsor1; Ptpmeg2; spri; dsh; hop; Evi5; hep; mew; sl; if; baz; par-6; upd1; phm; Pvf1; dome; kis; ex; CG4552; cpb; aop; Rab5; dpp; Hrs; Sec5; Tsp26A; stai; cup; Hrb27C; Pvr; grk; tai; Stam; ab; salm; CG6509; Rab3-GAP; Ced-12; bun; kuz; esg; Gli; BicC; GMF; Mhc; kel; Socs36E; tj; spi; Hakai; EcR; jing; ptc; Vang; Rme-8; Sin3A; lat; RN-tre; CG8155;…
GO:0060562	0.00485416	5.25953	1.14198	5	582	epithelial tube morphogenesis	0.00627903	2	ewg; ac; l(1)sc; pcl; ase; svr; CG13366; CG11382; arm; crn; Raf; boi; sgg; N; Myc; VhaAC39-1; Fas2; bi; ctp; ovo; RhoGAP5A; CG5966; rux; sqh; dx; Atx-1; brk; Dok; sn; fs(1)h; Smox; Nrg; oc; Lim1; Moe; Zpr1; btd; Sp1; CG15312; CG15309; dsh; hop; dlg1; Drak; bif; dy; Karl; pot; fw; LIMK1; Smr; ade5; CG12717; hep; sno; mew; NFAT; l(1)G0007; Lsd-2; sog; sd; tay; Stim; SMC3; mthl1; CG32572; if; RhoGAP…
GO:0090132	0.00491858	9.77221	0.349266	3	178	epithelium migration	0.00627903	2	dor; usp; Raf; egh; Tsp3A; N; Rala; brn; spoon; sqh; Dsor1; Ptpmeg2; spri; dsh; hop; Evi5; hep; mew; sl; if; baz; par-6; upd1; phm; Pvf1; dome; kis; ex; CG4552; cpb; aop; Rab5; dpp; Hrs; Sec5; Tsp26A; stai; cup; Hrb27C; Pvr; grk; tai; Stam; ab; salm; CG6509; Rab3-GAP; Ced-12; bun; kuz; esg; Gli; BicC; GMF; Mhc; kel; Socs36E; tj; spi; Hakai; EcR; jing; ptc; Vang; Rme-8; Sin3A; lat; RN-tre; CG8155;…
GO:0035295	0.00506328	4.45331	1.66392	6	848	tube development	0.00630674	2	G9a; ewg; ac; sc; l(1)sc; pcl; ase; svr; CG13366; CG11382; arm; crn; Raf; boi; sgg; N; Myc; VhaAC39-1; Fas2; bi; CHOp24; peb; pon; ctp; ovo; RhoGAP5A; Act5C; CG5966; rux; sqh; dx; Nf-YC; Atx-1; Inx2; brk; Dok; CHES-1-like; sn; fs(1)h; Smox; Nrg; Caf1-180; oc; Lim1; Moe; Bx42; Zpr1; lz; btd; Sp1; Idgf4; CG15312; CG15309; sisA; dsh; hop; dlg1; Drak; bif; Amun; dy; Karl; pot; fw; LIMK1; Smr; ade5; C…
GO:0034329	0.00515051	20.776	0.107919	2	55	cell junction assembly	0.00630674	2	pck; arm; moody; kirre; Bteb2; bou; nullo; Nrg; dlg1; baz; par-6; shakB; l(2)gl; cold; bark; PDZ-GEF; nrv2; wol; crok; Gli; vari; kune; wun; Galphao; Lac; cora; shg; Rap1; kst; Galphai; crim; Nrx-IV; Tsf2; Ssk; Cont; pyd; CG8121; GckIII; CG7713; loco; crb; mesh; Rok; jbug; hty; Ran; rasp; nate; ear; sie; l(3)06664; l(2)k06107; Src64B; Su(Gl)27; CG33506
GO:0040003	0.00531292	9.49697	0.359077	3	183	chitin-based cuticle development	0.00631831	2	svr; arm; sgg; Cpr5C; rtv; pot; Cpr11A; Cpr11B; CG15756; Cpr12A; obst-A; l(2)gl; Sec24CD; Eogt; Cpr23B; fred; Lam; mmy; Pcp; TwdlE; wol; Cpr30B; gny; Cpr35B; ck; amd; Hakai; laccase2; EcR; Lcp1; Lcp2; Lcp3; Lcp4; Cpr47Ea; Cpr47Eb; Cpr47Ec; Cpr47Ed; Cpr47Ee; Cpr47Ef; Cpr47Eg; TwdlBeta; reb; exp; Cpr49Ab; Cpr49Ac; Cpr49Ad; Cpr49Ae; Cpr49Af; Cpr49Ag; Cpr49Ah; Cpr50Ca; Cpr50Cb; Cpr51A; resilin; grh; …
GO:0001667	0.00547587	9.39111	0.363001	3	185	ameboidal-type cell migration	0.00631831	2	dor; usp; Raf; egh; Tsp3A; N; Rala; brn; spoon; sqh; Dsor1; Ptpmeg2; spri; dsh; hop; Evi5; hep; mew; sl; mthl1; if; baz; par-6; upd1; phm; Pvf1; dome; fog; kis; ex; CG4552; cpb; aop; Rab5; dpp; Hrs; Sec5; Tsp26A; stai; cup; Hrb27C; Pvr; grk; tai; Stam; ab; salm; CG6509; Rab3-GAP; Ced-12; bun; kuz; esg; Gli; BicC; GMF; Mhc; kel; Socs36E; tj; spi; Hakai; EcR; jing; ptc; Vang; Rme-8; pyr; jeb; Sin3A…
GO:0090130	0.00547587	9.39111	0.363001	3	185	tissue migration	0.00631831	2	dor; usp; Raf; egh; Tsp3A; N; Rala; brn; spoon; sqh; Dsor1; Ptpmeg2; spri; dsh; hop; Evi5; hep; mew; sl; mthl1; if; baz; par-6; upd1; phm; Pvf1; dome; fog; kis; ex; CG4552; cpb; aop; Rab5; dpp; Hrs; Sec5; Tsp26A; stai; cup; Hrb27C; Pvr; grk; tai; Stam; ab; salm; CG6509; Rab3-GAP; Ced-12; bun; kuz; esg; Gli; BicC; GMF; Mhc; kel; Socs36E; tj; spi; Hakai; EcR; jing; ptc; Vang; Rme-8; pyr; jeb; Sin3A…
GO:0035239	0.00612676	4.96148	1.20673	5	615	tube morphogenesis	0.00693595	2	ewg; ac; l(1)sc; pcl; ase; svr; CG13366; CG11382; arm; crn; Raf; boi; sgg; N; Myc; VhaAC39-1; Fas2; bi; ctp; ovo; RhoGAP5A; Act5C; CG5966; rux; sqh; dx; Atx-1; Inx2; brk; Dok; sn; fs(1)h; Smox; Nrg; oc; Lim1; Moe; Zpr1; btd; Sp1; CG15312; CG15309; dsh; hop; dlg1; Drak; bif; dy; Karl; pot; fw; LIMK1; Smr; ade5; CG12717; hep; sno; mew; NFAT; l(1)G0007; Lsd-2; sog; sd; tay; Stim; SMC3; mthl1; CG3257…
GO:0044699	0.00646389	3.71696	14.6496	21	7466	single-organism process	0.0071821	2	CG3038; G9a; CG13377; cin; ewg; CG13375; Or1a; y; ac; sc; l(1)sc; pcl; ase; Cyp4g1; CG18273; CG3156; CG17896; CG17778; svr; elav; CG4293; Appl; vnd; CG13366; CG13369; Dredd; Roc1a; Hmt4-20; SkpA; sdk; CG5254; RpL22; fz3; tw; Rbf; Sec22; MED22; TRAM; mus81; CG3703; CG3699; CG3690; CDC45L; CG14624; CG11382; CG11398; CG3638; CG11403; DAAM; CG11412; CG12773; CG11417; png; CG11448; Lrpprc2; Ns3; O-fut…
GO:0009887	0.00759555	4.06803	1.80912	6	922	organ morphogenesis	0.00828606	2	ewg; ac; sc; pcl; ase; svr; CG13366; sdk; CG11382; trr; arm; pn; Raf; boi; sgg; rst; kirre; N; Myc; Rala; ec; Fas2; norpA; bi; peb; ctp; ovo; RhoGAP5A; GAA1; CG5966; rux; sqh; dx; Atx-1; brk; Dok; sn; fs(1)h; Smox; Nrg; oc; Lim1; Moe; lz; btd; Sp1; CG15312; CG15309; sev; dsh; hop; dlg1; Drak; bif; dy; Karl; pot; fw; Mks1; CG43921; LIMK1; Smr; ade5; CG12717; hep; sno; mew; up; BthD; NFAT; l(1)G000…
GO:0051705	0.008288	8.04288	0.421866	3	215	multi-organism behavior	0.00888	2	CG13377; y; CG3638; Adar; tko; egh; per; Syx4; w; dnc; CHOp24; SPR; frma; Act5C; Tbh; Nrg; Moe; dlg1; p24-1; cac; CkIalpha; ade5; fne; hec; l(1)G0007; rut; eag; opm; nonA; para; CG32572; ppk23; CG42684; Sh; Bx; CG43759; amn; tilB; Bacc; tim; ed; Rtnl1; qtc; CG9171; Acp26Ab; Acp26Aa; dsf; Nlg2; RapGAP1; Rack1; Btk29A; Acp32CD; Gr32a; Pde1c; Gr33a; aret; Tehao; noc; btv; Acp36DE; CG17323; Ddc; Hr39…
GO:0045216	0.00892048	15.4868	0.143238	2	73	cell-cell junction organization	0.00938998	2	pck; arm; moody; kirre; Bteb2; RhoGAP5A; bou; nullo; Nrg; dlg1; baz; par-6; shakB; l(2)gl; cold; bark; Traf4; PDZ-GEF; nrv2; wol; crok; sna; Gli; vari; kune; Src42A; wun; Mmp2; Galphao; Lac; cora; shg; Mmp1; Rac1; Rap1; kst; Cip4; Galphai; Rac2; crim; Nrx-IV; Tsf2; Ssk; alpha-Cat; Cont; pyd; CG8121; Csk; CG5205; GckIII; CG7713; Rab11; loco; jar; crb; mesh; awd; jbug; hty; Ran; rasp; nate; ear; si…
GO:0034330	0.00915731	15.2705	0.145201	2	74	cell junction organization	0.00947308	2	pck; arm; moody; kirre; Bteb2; RhoGAP5A; bou; nullo; Nrg; dlg1; baz; par-6; shakB; l(2)gl; cold; bark; Traf4; PDZ-GEF; nrv2; wol; crok; sna; Gli; vari; kune; Src42A; wun; Mmp2; Galphao; Lac; cora; shg; Mmp1; Rac1; Rap1; kst; Cip4; Galphai; Rac2; crim; Nrx-IV; Tsf2; Ssk; alpha-Cat; Cont; pyd; CG8121; Csk; CG5205; GckIII; CG7713; Rab11; loco; jar; crb; mesh; awd; Rok; jbug; hty; Ran; rasp; nate; ea…
GO:0042679	0.00977395	132.417	0.00981085	1	5	compound eye cone cell fate specification	0.00977395	2	S6kII; Su(H); chn; sv; l(2)Ta
GO:0042682	0.00977395	132.417	0.00981085	1	5	regulation of compound eye cone cell fate specification	0.00977395	2	S6kII; Su(H); chn; sv; l(2)Ta
GO:0006811	1.89538e-05	10.53	0.881563	7	416	ion transport	0.000247429	4	CG3638; CG12773; Nmdar2; inc; Vha36-3; brv3; Csat; w; VhaAC39-1; CG6927; SK; NAAT1; Ca-alpha1T; Efr; Ctr1A; iav; nAChRalpha3; Ir8a; ATPsyndelta; Hk; CG1628; sesB; Ant2; Ork1; rtv; CG43155; ATP7; CG10353; cac; CG15719; Fer3HCH; Clic; CG9413; eag; CG9065; Cngl; CG8916; Lcch3; Stim; CG4239; CG9981; CG4301; para; ppk28; Nprl2; CG16700; CG4991; ppk23; Ucp4A; Sh; Tsf1; nAChRalpha7; CG12531; Pmp70; tty;…
GO:0051234	1.9033e-05	5.83696	3.72545	13	1758	establishment of localization	0.000247429	4	CG3156; svr; CG4293; CG5254; Sec22; TRAM; CG3690; CG3638; CG12773; Ns3; pck; Rab27; rush; sta; Nmdar2; inc; dor; CG14798; Pex5; Vps26; Ocrl; Unc-76; Nmd3; Mct1; Vinc; CG3191; CG3091; gt; Vha36-3; egh; Tsp3A; brv3; sgg; Csat; ttm50; Syx4; w; Myc; CG10804; Parg; Mnt; yin; CG2930; VhaAC39-1; CG42541; Vap-33A; lva; norpA; CG3556; rb; CHOp24; Torsin; ctp; CG6978; CG6927; CG6903; SK; NAAT1; Vsx1; CG316…
GO:0051179	3.54032e-05	5.28553	4.59006	14	2166	localization	0.000306827	4	CG3156; svr; CG4293; Roc1a; CG5254; Sec22; TRAM; CG3690; CG3638; CG12773; Ns3; pck; Rab27; rush; sta; Nmdar2; inc; dor; CG14798; Scgdelta; Pex5; Vps26; arm; Ocrl; usp; Actn; Unc-76; Nmd3; Mct1; Vinc; crn; CG3191; CG3091; Raf; gt; Vha36-3; egh; Tsp3A; Seipin; brv3; sgg; Csat; ttm50; Syx4; w; N; Myc; CG10804; Gas8; Parg; Mnt; Rala; yin; CG2930; VhaAC39-1; CG42541; Vap-33A; lva; brn; norpA; CG3556; …
GO:1902578	5.8429e-05	5.39063	3.50718	12	1655	single-organism localization	0.000374559	4	CG3156; svr; CG4293; CG5254; Sec22; TRAM; CG3690; CG3638; CG12773; Ns3; pck; Rab27; rush; sta; Nmdar2; inc; dor; CG14798; Scgdelta; Pex5; Vps26; arm; Ocrl; Actn; Unc-76; Nmd3; Mct1; Vinc; gt; Vha36-3; egh; Tsp3A; brv3; sgg; Csat; Syx4; w; Myc; CG10804; Parg; Mnt; yin; CG2930; VhaAC39-1; CG42541; Vap-33A; CG3556; rb; CHOp24; Torsin; ctp; CG6978; CG6927; CG6903; SK; NAAT1; Vsx1; CG3160; CG3149; GAA…
GO:0006810	7.20306e-05	5.2615	3.58135	12	1690	transport	0.000374559	4	CG3156; svr; CG4293; CG5254; Sec22; TRAM; CG3690; CG3638; CG12773; Ns3; pck; Rab27; rush; sta; Nmdar2; inc; dor; CG14798; Pex5; Vps26; Ocrl; Unc-76; Nmd3; Mct1; Vinc; CG3191; CG3091; gt; Vha36-3; egh; Tsp3A; brv3; sgg; Csat; ttm50; Syx4; w; Myc; CG10804; Parg; Mnt; yin; CG2930; VhaAC39-1; CG42541; Vap-33A; norpA; CG3556; rb; CHOp24; Torsin; CG6978; CG6927; CG6903; SK; NAAT1; Vsx1; CG3160; CG3149;…
GO:0044765	0.000133955	5.13975	3.20202	11	1511	single-organism transport	0.000562293	4	CG3156; svr; CG4293; CG5254; Sec22; TRAM; CG3690; CG3638; CG12773; Ns3; pck; Rab27; rush; sta; Nmdar2; inc; dor; CG14798; Pex5; Vps26; Unc-76; Nmd3; Mct1; Vinc; gt; Vha36-3; egh; Tsp3A; brv3; sgg; Csat; Syx4; w; Myc; CG10804; Parg; Mnt; yin; CG2930; VhaAC39-1; CG42541; Vap-33A; CG3556; rb; CHOp24; Torsin; CG6978; CG6927; CG6903; SK; NAAT1; Vsx1; CG3160; CG3149; GAA1; Act5C; Ca-alpha1T; Efr; sqh; …
GO:0006820	0.000151387	17.3747	0.275489	4	130	anion transport	0.000562293	4	CG3638; CG12773; Csat; w; NAAT1; Efr; CG1628; sesB; Ant2; CG10353; Clic; CG9413; CG9981; CG4301; Nprl2; CG16700; CG4991; CG12531; Pmp70; tty; Eaat2; VGlut; colt; CG3036; CG14040; Oatp26F; CG3476; Ndae1; Ntl; CG13384; Eaat1; Oatp30B; CG17139; Porin2; porin; JhI-21; Oatp33Ea; Oatp33Eb; CG31729; CG15279; Dic3; CG13743; CG8026; CG1698; polyph; Sln; CG8850; ClC-b; CG8785; CG42321; VGAT; Ih; NaPi-T; Pi…
GO:0055085	0.000390354	7.47619	1.00447	6	474	transmembrane transport	0.00126865	4	CG3156; CG3690; CG12773; pck; Pex5; Mct1; Vha36-3; VhaAC39-1; CG6978; NAAT1; Ca-alpha1T; Efr; Ctr1A; CG3168; CG14439; iav; CG4607; CG9657; CG1409; ATPsyndelta; CG1628; sesB; Ant2; Ork1; rtv; CG43155; CG15221; cac; CG1824; CG15719; MFS10; CG9413; CG15890; eag; Cngl; Chc; Stim; para; wus; CG16700; CG4991; Sh; CG6540; CG14196; CG8028; CG8034; CG8051; out; Sec61gamma; CG12531; Pmp70; Nhe1; MFS3; CG31…
GO:0045824	0.00181366	36.2457	0.0635743	2	30	negative regulation of innate immune response	0.00523947	4	Rala; upd1; dome; Usp2; GlyP; CG14040; Spn28Dc; Prosalpha6T; sax; PGRP-SC1a; PGRP-SC2; wun; SP2353; pirk; Tim10; Nxt1; LysE; scny; GstO2; Spn77Ba; slif; tefu; Atg6; puf; faf; rambl; E(da); gru; onecut; 5SrRNA:CR33438
GO:0003333	0.0026062	29.8353	0.0762891	2	36	amino acid transmembrane transport	0.00534676	4	CG12773; NAAT1; CG1628; CG9413; CG16700; CG4991; CG12531; CG13384; JhI-21; CG15279; CG13743; CG1698; polyph; CG8850; CG8785; VGAT; List; CG30394; kcc; CG1139; CG4476; path; CG32079; CG7888; Ncc69; mnd; CG7255; CG5535; CG13248; slif; CG31547; CG7708; CG17119; CG13646; gb; CG1607
GO:0015698	0.0026062	29.8353	0.0762891	2	36	inorganic anion transport	0.00534676	4	CG3638; CG10353; Clic; tty; CG3036; Ndae1; Dic3; ClC-b; NaPi-T; Picot; icln; CG5002; MFS15; CG9090; Best2; NaPi-III; CG6938; CG6928; Ncc69; Mpcp; Best4; Best3; ClC-c; Prestin; HisCl1; ClC-a; Dic1; CG6125; CG5404; Esp; CG7912; CG9702; CG9717; pa; l(3)05822; ACXA
GO:0031348	0.00290061	28.1733	0.0805274	2	38	negative regulation of defense response	0.00534676	4	Rala; upd1; Ulp1; dome; Usp2; GlyP; CG14040; Spn28Dc; nub; Prosalpha6T; TM9SF4; TM9SF2; sax; PGRP-SC1a; PGRP-SC2; wun; casp; SP2353; pirk; Tim10; dnr1; Nxt1; LysE; scny; GstO2; Spn77Ba; slif; PGRP-LB; tefu; Atg6; puf; faf; rambl; E(da); gru; onecut; dbo; 5SrRNA:CR33438
GO:1903825	0.00290061	28.1733	0.0805274	2	38	organic acid transmembrane transport	0.00534676	4	CG12773; NAAT1; CG1628; CG9413; CG16700; CG4991; CG12531; CG13384; JhI-21; CG15279; CG13743; CG1698; polyph; CG8850; CG8785; VGAT; List; CG30394; kcc; CG1139; CG4476; path; CG32079; CG7888; Ncc69; mnd; CG7255; CG5535; CG13248; slif; CG31547; Dic1; CG7708; CG17119; CG13646; gb; CG1607; CG2316
GO:0044699	0.00300297	4.07205	15.8215	23	7466	single-organism process	0.00534676	4	CG3038; G9a; CG13377; cin; ewg; CG13375; Or1a; y; ac; sc; l(1)sc; pcl; ase; Cyp4g1; CG18273; CG3156; CG17896; CG17778; svr; elav; CG4293; Appl; vnd; CG13366; CG13369; Dredd; Roc1a; Hmt4-20; SkpA; sdk; CG5254; RpL22; fz3; tw; Rbf; Sec22; MED22; TRAM; mus81; CG3703; CG3699; CG3690; CDC45L; CG14624; CG11382; CG11398; CG3638; CG11403; DAAM; CG11412; CG12773; CG11417; png; CG11448; Lrpprc2; Ns3; O-fut…
GO:0098656	0.00337014	26	0.0868849	2	41	anion transmembrane transport	0.00534676	4	CG12773; NAAT1; CG1628; CG9413; CG16700; CG4991; CG12531; CG13384; JhI-21; CG15279; Dic3; CG13743; CG1698; polyph; CG8850; CG8785; VGAT; NaPi-T; Picot; List; CG30394; kcc; CG1139; CG4476; path; CG32079; CG7888; Ncc69; mnd; CG7255; CG5535; CG13248; slif; CG31547; Dic1; CG7708; CG17119; CG13646; gb; CG1607; CG2316
GO:0050776	0.00352446	10.9886	0.309395	3	146	regulation of immune response	0.00534676	4	ac; Dredd; CG4325; CG32795; Rala; Ubr3; Crag; PGRP-SA; wisp; PGRP-LE; upd1; betaCOP; Hayan; psh; dome; Ntf-2; Usp2; crq; ush; GlyP; pog; CG14040; Lam; CG13994; smt3; LanB1; Spn28Dc; Etl1; CYLD; RluA-2; aub; Mt2; nub; Prosalpha6T; Tehao; p38b; cact; Dif; dl; cad; ubl; LRR; sax; PGRP-SC1a; PGRP-SC2; Sec31; Su(var)2-10; Myd88; wun; Mmp2; CG1667; Def; Jra; Diap2; casp; SP2353; Dark; CG17680; Dpt; Tab…
GO:0034220	0.00359282	10.9115	0.311514	3	147	ion transmembrane transport	0.00534676	4	CG12773; Vha36-3; VhaAC39-1; NAAT1; Ca-alpha1T; Ctr1A; ATPsyndelta; CG1628; Ork1; rtv; CG43155; cac; CG15719; CG9413; Stim; CG16700; CG4991; CG12531; nompC; Sec61alpha; Ent2; ATPsynGL; CG13384; Vha16-5; Ca-beta; Vha100-5; JhI-21; CG5421; Vha68-3; CG15279; Ca-alpha1D; Trpgamma; VhaSFD; Zip42C.1; Zip42C.2; Dic3; CG8713; CG13743; VhaAC45; trpl; CG1688; CG1698; polyph; Vha36-2; Cam; CG8850; CG8785; V…
GO:0050777	0.00370161	24.7278	0.0911231	2	43	negative regulation of immune response	0.00534676	4	Rala; upd1; dome; Usp2; GlyP; CG14040; Lam; Spn28Dc; nub; Prosalpha6T; LRR; sax; PGRP-SC1a; PGRP-SC2; wun; Jra; casp; SP2353; Dark; pirk; Tim10; dnr1; RYBP; Nxt1; LysE; scny; GstO2; Spn77Ba; slif; CG9636; tefu; Stat92E; Pli; Atg6; p38a; puf; faf; rambl; E(da); gru; onecut; clt; 5SrRNA:CR33438
GO:0006865	0.00478315	21.5609	0.103838	2	49	amino acid transport	0.00654536	4	CG12773; NAAT1; CG1628; CG9413; Nprl2; CG16700; CG4991; CG12531; VGlut; Ntl; CG13384; Eaat1; JhI-21; CG15279; CG13743; CG8026; CG1698; polyph; CG8850; CG8785; VGAT; Ih; List; CG30394; CG5549; kcc; CG1139; CG4476; path; CG32079; CG7888; Ncc69; mnd; CG7255; cln3; CG5535; CG13248; slif; CG31547; CD98hc; GC1; GC2; CG7708; CG17119; CG13646; gb; CG1607; Gat; l(3)05822
GO:0048599	0.00557318	9.27885	0.364493	3	172	oocyte development	0.00724514	4	arm; egh; PI4KIIIalpha; N; swa; Pat1; Moe; CkIIbeta; wisp; gd; lic; Grip128; sog; Chc; baz; par-6; Mer; l(2)gl; dpp; Syt1; Sec5; capu; Scox; chic; cup; Hrb27C; Rbsn-5; grk; Pka-C1; Grip75; aub; Ge-1; Rab6; cni; BicD; gammaTub37C; vls; IKKepsilon; del; E2f2; gus; didum; gcl; tsu; TER94; sel; 14-3-3zeta; psq; cuff; SmD3; muskelin; Mos; Nacalpha; scb; ItgaPS4; Dg; Lis-1; krimp; csul; Khc; POSH; stau…
GO:0071705	0.00622449	8.90483	0.379327	3	179	nitrogen compound transport	0.00770651	4	CG12773; sta; egh; Csat; w; Myc; yin; CG2930; CG3556; NAAT1; Efr; CG9650; Erk7; RpS28b; CG1628; sesB; Ant2; Dlic; CG9413; CG8184; Chc; U2af50; Nprl2; CG16700; CG4991; CG12531; Ent1; Eaat2; Rim2; VGlut; Trn-SR; colt; daw; Cog3; CG14040; Hel25E; Fic; Ent2; CG3476; ninaC; Ntl; CG13384; Eaat1; Nup107; Nup160; JhI-21; Ref2; CG15279; VhaSFD; BicD; Sytalpha; swm; CG8671; dimm; CG14749; CG13743; CG8083; …
GO:0002683	0.0073278	17.1593	0.129268	2	61	negative regulation of immune system process	0.00853611	4	Rala; upd1; Ulp1; dome; Usp2; ush; lwr; GlyP; CG14040; Lam; wg; Spn28Dc; C1GalTA; gcm; gcm2; nub; Prosalpha6T; heix; LRR; sax; PGRP-SC1a; PGRP-SC2; wun; Jra; casp; SP2353; Dark; CG10764; pirk; Tim10; dnr1; RYBP; Nxt1; LysE; scny; GstO2; Spn77Ba; slif; CG9636; mfas; tefu; pxb; srp; CSN5; cher; Stat92E; Pli; Atg6; p38a; puf; Doa; faf; rambl; E(da); gru; Vha68-1; onecut; dbo; clt; mthl11; 5SrRNA:CR3…
GO:0009994	0.00755118	8.28373	0.406875	3	192	oocyte differentiation	0.00853611	4	arm; egh; PI4KIIIalpha; N; swa; Pat1; Moe; CkIIbeta; wisp; gd; lic; Grip128; sog; Chc; baz; par-6; Mer; l(2)gl; mio; dpp; Syt1; Sec5; capu; Scox; chic; cup; Hrb27C; Rbsn-5; grk; Pka-C1; Grip75; aub; Ge-1; Rab6; cni; BicD; gammaTub37C; vls; IKKepsilon; del; E2f2; gus; didum; drosha; gcl; tsu; dap; TER94; sel; 14-3-3zeta; psq; cuff; SmD3; muskelin; Mos; Nacalpha; AGO1; scb; ItgaPS4; Dg; Lis-1; krim…
GO:0048469	0.0082159	8.025	0.41959	3	198	cell maturation	0.00890056	4	Roc1a; SkpA; usp; egh; N; Fas2; ctp; swa; Pat1; Moe; Imp; CkIIbeta; wisp; gd; lic; Grip128; sog; Chc; baz; par-6; Mer; l(2)gl; kis; dpp; Hrs; Syt1; capu; Scox; fusl; chic; cup; Hrb27C; SA; Rbsn-5; grk; Pka-C1; Grip75; Stam; aub; Ge-1; Rab6; Uvrag; cni; BicD; gammaTub37C; vls; IKKepsilon; E2f2; gus; EcR; didum; Cul1; gcl; tsu; shrb; ced-6; Uba1; TER94; sel; 14-3-3zeta; psq; cuff; SmD3; muskelin; N…
GO:0015849	0.00929678	15.1009	0.146221	2	69	organic acid transport	0.00929678	4	CG12773; NAAT1; CG1628; CG9413; Nprl2; CG16700; CG4991; CG12531; Pmp70; Eaat2; VGlut; colt; CG3476; Ntl; CG13384; Eaat1; JhI-21; CG15279; CG13743; CG8026; CG1698; polyph; Sln; CG8850; CG8785; VGAT; Ih; List; CG30394; CG44252; CG5549; kcc; CG1139; CG7514; CG18418; CG4476; path; CG32079; CG7888; Ncc69; mnd; CG7255; frc; cln3; CG5535; Prestin; CG13248; slif; CG31547; CD98hc; CG9396; CG9399; GC1; GC2…
GO:0046942	0.00929678	15.1009	0.146221	2	69	carboxylic acid transport	0.00929678	4	CG12773; NAAT1; CG1628; CG9413; Nprl2; CG16700; CG4991; CG12531; Pmp70; Eaat2; VGlut; colt; CG3476; Ntl; CG13384; Eaat1; JhI-21; CG15279; CG13743; CG8026; CG1698; polyph; Sln; CG8850; CG8785; VGAT; Ih; List; CG30394; CG44252; CG5549; kcc; CG1139; CG7514; CG18418; CG4476; path; CG32079; CG7888; Ncc69; mnd; CG7255; frc; cln3; CG5535; Prestin; CG13248; slif; CG31547; CD98hc; CG9396; CG9399; GC1; GC2…
GO:0007160	0.000101716	181.6	0.0155404	2	22	cell-matrix adhesion	0.000178315	5	Ten-a; mew; if; CG6867; Pax; Itgbn; Ndg; muskelin; scb; ItgaPS4; ItgaPS5; Rac1; Fit1; dyl; zye; mesh; Ret; jbug; mit; Esm; Jafrac2; CG12061
GO:0031589	0.000178315	134.444	0.020485	2	29	cell-substrate adhesion	0.000178315	5	Ten-a; mew; if; CG6867; Tig; LanB1; Pax; Itgbn; pgant3; Ndg; muskelin; scb; ItgaPS4; ItgaPS5; Rac1; Fit1; dyl; LanA; Fhos; LanB2; zye; eater; mesh; Ret; jbug; mit; Esm; Jafrac2; CG12061
GO:0080135	1.05426e-05	37.8799	0.144416	4	115	regulation of cellular response to stress	0.000843405	6	CG30323; NA; p38c; SkpA; CG4061; Raf; sgg; N; Rala; peb; CG4078; mof; Corp; Imp; hep; NFAT; ben; CG6961; Atg101; MKP-4; ebi; Pino; cpb; vtd; CG41128; CG40485; Traf4; Cap-D3; chic; Nse1; Mnn1; Cka; emb; ics; p38b; CG10176; lok; Dhx15; Egm; Buffy; Cam; Atg9; Sod2; MESR4; POSH; slim; Atg7; hppy; cpa; CG11475; CG2921; tRNA:CR31971; Dcp-1; sigmar; Rev1; Usp5; armi; ago; S6k; melt; BI-1; PGRP-LF; Sod; …
GO:0007017	3.85308e-05	13.1816	0.703242	6	560	microtubule-based process	0.00109915	6	CG42661; Tsp68C; scy; Fs(2)Etr; CG46025; CG46026; dpr1; CG33253; CG42271; rho-5; CG7377; CG17778; SkpA; RpL22; mei-38; sta; mip130; Unc-76; crn; egh; Klp3A; eIF3ga; sgg; Vap-33A; dgt4; ctp; RpL35; Spx; Marf; RpL7A; Pat1; RpL17; CG10932; RpS6; CG1571; CG32039; CG32240; CG32668; Moe; Rbm13; CG32820; Sdic3; CG32829; CG7033; fh; CG31076; CG31321; ric8a; CG33082; feo; sofe; Klp10A; Dlic; Kap3; dlg1; K…
GO:0043506	4.1218e-05	302.833	0.0100463	2	8	regulation of JUN kinase activity	0.00109915	6	sgg; hep; MKP-4; ics; Tak1; Mkk4; Rgl; c
GO:0006996	0.000191023	7.11301	2.45758	9	1957	organelle organization	0.00272182	6	clt; TotZ; CG43133; Mst77Y-7; Mst77Y-8; Su(E1)-A; CR44237; disjointed; CR44555; ATP6; l(1)1Bb; l(4)7-M484; l(4)7-M1365; CG33939; CG33946; CG30037; CG30080; CG30172; Opbp; mot-32l; l(3)91Ce; scy; ch; mei-S8; mei-S282; m(Est-6); mit(1)3; mit(1)4; mit(1)5; mit(1)6; mit(1)7; mit(1)8; mit(1)9; mit(1)10; mit(1)11; mit(1)12; mit(1)13; mit(1)14; mit(1)17; Res; pf-7; pf-6; pf-5; pf-4; pf-3; pf-2; l(3)S118…
GO:0032436	0.000198886	121.048	0.0213484	2	17	positive regulation of proteasomal ubiquitin-dependent protein catabolic process	0.00272182	6	sgg; APC7; CkIalpha; Cks30A; Cdc23; Pomp; TER94; PI31; Ufd1-like; CSN5; Cdc16; dco; cof; l(3)63Fd; mat(2)cell-J; Best1; CG34234
GO:1901800	0.000223583	113.473	0.0226042	2	18	positive regulation of proteasomal protein catabolic process	0.00272182	6	sgg; APC7; CkIalpha; Usp2; Cks30A; Cdc23; Pomp; TER94; PI31; Ufd1-like; CSN5; Cdc16; dco; cof; l(3)63Fd; mat(2)cell-J; Best1; CG34234
GO:0080134	0.000257917	16.1712	0.327761	4	261	regulation of response to stress	0.00272182	6	Gpi1; CG30323; NA; p38c; CG33339; AlkB; G9a; Dredd; SkpA; CG4061; Raf; sgg; CG32795; N; Rala; peb; CG4078; mof; Ubr3; Traf6; Corp; Crag; Imp; PGRP-SA; hep; NFAT; ben; PGRP-LE; upd1; betaCOP; Hayan; psh; CG6961; Atg101; Ulp1; MKP-4; dome; Cdc42; Usp2; ebi; Pino; cpb; GlyP; vtd; CG41128; Spf45; CG40485; Traf4; ine; CG14040; Cap-D3; chic; CG13994; Nse1; smt3; Mnn1; LanB1; Spn28Dc; Cka; emb; Etl1; me…
GO:1903052	0.000306205	95.5338	0.0263716	2	21	positive regulation of proteolysis involved in cellular protein catabolic process	0.00272182	6	sgg; APC7; CkIalpha; Usp2; Cks30A; Cdc23; Pomp; TER94; Fbl6; PI31; Ufd1-like; rpr; CSN5; Cdc16; dco; Spt6; cof; l(3)63Fd; mat(2)cell-J; Best1; CG34234
GO:1903364	0.000306205	95.5338	0.0263716	2	21	positive regulation of cellular protein catabolic process	0.00272182	6	sgg; APC7; CkIalpha; Usp2; Cks30A; Cdc23; Pomp; TER94; Fbl6; PI31; Ufd1-like; rpr; CSN5; Cdc16; dco; Spt6; cof; l(3)63Fd; mat(2)cell-J; Best1; CG34234
GO:0022402	0.000390719	8.4355	1.06868	6	851	cell cycle process	0.00312575	6	Gr98c; CR44047; l(1)1Bb; l(4)7-M484; l(4)7-M1365; CG33939; CG33946; CG30154; mot-32l; mei-S8; mei-S282; m(Est-6); mit(1)3; mit(1)4; mit(1)5; mit(1)6; mit(1)7; mit(1)8; mit(1)9; mit(1)10; mit(1)11; mit(1)12; mit(1)13; mit(1)14; mit(1)17; Res; pf-7; pf-6; pf-5; pf-4; pf-3; pf-2; l(3)S118602b; CR40005; CR40601; CG33337; p38c; CheB42a; CG33226; rho-5; ase; CG17778; SkpA; RpL22; Rbf; MED22; mus81; CDC…
GO:0031329	0.000527424	22.8916	0.163252	3	130	regulation of cellular catabolic process	0.00317598	6	Gr98c; CG32396; p38c; CG4025; Raf; sgg; Myc; APC7; Smox; Traf6; CG12772; Atg8a; sesB; Upf1; CkIalpha; Tis11; hep; REG; CG31099; Atg101; Sec61gamma; Usp2; Atg4a; GlyP; mio; daw; vtd; ND-AGGG; CG40485; Bub1; Sec61alpha; Rca1; CG18304; Cks30A; Utx; piwi; aub; Uvrag; CycE; Acn; Pax; Cdc23; Pomp; BubR1; EcR; CG15237; CSN4; Nup44A; babo; Rab32; Mad1; TER94; Fbl6; Buffy; Mtor; PI31; DUBAI; Dg; Atg9; Sod…
GO:0007423	0.000543447	9.63985	0.725846	5	578	sensory organ development	0.00317598	6	FASN2; Ranbp16; Mst77Y-2; CR44555; CG30172; CG30480; mor(1)9; N-b; ire; rdgD; rug; pom; l(1)TK101; Fs(2)Etr; Opl; CG32236; Rst(2)chl; l(1)18; l(3)08034; Proc; l(3)C416; l(3)C101; l(3)113; rdm; rm; rets; snl; ac; sc; ase; sdk; trr; arm; pn; temp; boi; sgg; rst; kirre; N; Rala; ec; Fas2; norpA; bi; peb; ctp; RhoGAP5A; lin-52; GAA1; rux; Pink1; sn; Or65a; oc; Lim1; Moe; AP-1gamma; CG31029; lz; sev; …
GO:0043405	0.00054835	69.7747	0.0351621	2	28	regulation of MAP kinase activity	0.00317598	6	sgg; hep; lic; Rab3-GEF; mbt; MKP-4; smt3; ics; step; Fak; PTP-ER; Ptp61F; btl; Tak1; Mkp3; wnd; puc; ato; Mkk4; bnl; Ask1; alph; CG15528; BG642312; Inr-A; Rgl; c; ACXE
GO:2001020	0.000588537	67.1852	0.0364179	2	29	regulation of response to DNA damage stimulus	0.00317598	6	CG30323; p38c; CG4078; mof; Corp; NFAT; CG6961; Pino; Cap-D3; Nse1; lok; Cam; MESR4; CG11475; CG2921; Rev1; armi; melt; ssp2; JHDM2; mura; Blm; trx; SNF4Agamma; E(spl)m7-HLH; ball; spn-A; Rab18; Hsp60B
GO:0007389	0.00063999	9.28298	0.752217	5	599	pattern specification process	0.00317598	6	clt; ale; bd; dil; blt; l(1)air13; fs(4)34; zpg; CR40601; dpr1; CG32318; vnd; DAAM; arm; Raf; gt; boi; sgg; crm; N; Myc; fd3F; ec; bi; peb; ovo; spoon; sqh; swa; dx; Pat1; Nf-YC; Atx-1; brk; CHES-1-like; sn; fs(1)h; CG32017; oc; Lim1; Moe; CG31076; Dsor1; lz; btd; sev; dsh; hop; CkIIbeta; SelG; gd; tsg; hep; lic; mew; NetB; Grip128; sog; Chc; exd; disco; CG31773; CG32228; baz; f; B-H2; B-H1; par-…
GO:0045732	0.000673077	62.5419	0.0389294	2	31	positive regulation of protein catabolic process	0.00317598	6	sgg; APC7; CkIalpha; Usp2; Fbw5; Cks30A; l(2)gd1; Cdc23; Pomp; gus; Cul4; TER94; Fbl6; PI31; Fsn; Ufd1-like; rpr; Lon; SAK; ctrip; pic; CSN5; Cdc16; Apc2; dco; Spt6; cof; l(3)63Fd; mat(2)cell-J; Best1; CG34234
GO:0033554	0.000674897	9.16957	0.761008	5	606	cellular response to stress	0.00317598	6	TotZ; TotX; TotF; TotC; Ste12DOR; CR44047; CG30197; CG30323; CG30383; cs; l(3)cl-R3; mus208; NA; CG33337; p38c; CG33226; Ste:CG33237; CG33322; SkpA; Rbf; mus81; CDC45L; CG11403; Ns3; dor; CG14798; CG14803; Edem1; Hr4; CG4061; Nmd3; CG3071; Raf; sgg; eIF2B-beta; N; Rala; Xpac; Tip60; mei-9; CG3527; peb; TrxT; dhd; Mcm3; XRCC1; CG4078; mof; raptor; Marf; Atg5; Dok; CHES-1-like; Traf6; Trxr-1; Corp;…
GO:0009894	0.000754734	20.1619	0.184601	3	147	regulation of catabolic process	0.00322087	6	Gr98c; CG32396; p38c; CG4025; Raf; sgg; Myc; APC7; Smox; Traf6; CG12772; Atg8a; sesB; Upf1; CkIalpha; Tis11; hep; REG; Lsd-2; CG31099; Atg101; Sec61gamma; Usp2; Atg4a; GlyP; mio; daw; vtd; ND-AGGG; CG40485; Bub1; Fbw5; Sec61alpha; Rca1; CG18304; Cks30A; Utx; piwi; aub; l(2)gd1; Uvrag; CycE; Acn; Rpn3; Pax; Cdc23; Pomp; gus; BubR1; EcR; CG15237; CSN4; Nup44A; Cul4; babo; Su(var)2-10; Rab32; Mad1; …
GO:1902589	0.000764957	6.50495	1.71541	7	1366	single-organism organelle organization	0.00322087	6	TotZ; Mst77Y-7; Mst77Y-8; Su(E1)-A; l(1)1Bb; l(4)7-M484; l(4)7-M1365; CG33939; CG33946; Opbp; mot-32l; l(3)91Ce; scy; ch; mei-S8; mei-S282; m(Est-6); mit(1)3; mit(1)4; mit(1)5; mit(1)6; mit(1)7; mit(1)8; mit(1)9; mit(1)10; mit(1)11; mit(1)12; mit(1)13; mit(1)14; mit(1)17; Res; pf-7; pf-6; pf-5; pf-4; pf-3; pf-2; l(3)S118602b; moz; rar1; Pzl; PRY; WDY; CCY; CR40005; CR40601; p38c; qvr; CheB42a; dp…
GO:0007049	0.000899008	7.12773	1.24825	6	994	cell cycle	0.00346125	6	Gr98c; CR44047; l(1)1Bb; l(4)7-M484; l(4)7-M1365; CG33939; CG33946; CG30154; Cht12; mot-32l; mei-S8; mei-S282; m(Est-6); mit(1)3; mit(1)4; mit(1)5; mit(1)6; mit(1)7; mit(1)8; mit(1)9; mit(1)10; mit(1)11; mit(1)12; mit(1)13; mit(1)14; mit(1)17; Res; pf-7; pf-6; pf-5; pf-4; pf-3; pf-2; l(3)S118602b; CR40005; CR40601; CG33337; p38c; CheB42a; CG33226; rho-5; CG33269; ac; sc; ase; CG17778; SkpA; RpL22…
GO:0032434	0.000908578	53.3235	0.0452084	2	36	regulation of proteasomal ubiquitin-dependent protein catabolic process	0.00346125	6	sgg; APC7; CkIalpha; Bub1; Rca1; Cks30A; CycE; Cdc23; Pomp; BubR1; CG15237; CSN4; Mad1; TER94; Mtor; PI31; mad2; Ufd1-like; CycA; Chro; alphaTub84B; alphaTub85E; CSN5; Mps1; Cdc16; crb; Bub3; dco; rod; cof; l(3)63Fd; E(lz); mat(2)cell-J; Best1; CG34234; CG18508
GO:0061136	0.00101237	50.3532	0.04772	2	38	regulation of proteasomal protein catabolic process	0.00368136	6	sgg; APC7; CkIalpha; REG; Usp2; Bub1; Rca1; Cks30A; CycE; Cdc23; Pomp; BubR1; CG15237; CSN4; Mad1; TER94; Mtor; PI31; mad2; Ufd1-like; CycA; Chro; alphaTub84B; alphaTub85E; CSN5; Mps1; Cdc16; crb; Bub3; dco; rod; cof; l(3)63Fd; E(lz); mat(2)cell-J; Best1; CG34234; CG18508
GO:0051276	0.00113863	8.11448	0.853936	5	680	chromosome organization	0.00381546	6	clt; TotZ; CG43133; Mst77Y-7; Mst77Y-8; Su(E1)-A; disjointed; l(2)GPMG-14; Pzl; PRY; WDY; CCY; CR40005; CR40601; Mod(var)E646; Mod(var)E226; Mod(var)E1672; Mod(var)E1451; Mod(var)E1377; Mod(var)E1350; Mod(var)E1275; Mod(var)E1261; Mod(var)E1178; Mod(var)E113; Mod(var)E1060; Mod(var)E1047; Mod(var)600; Mod(var)26; Mod(var)242; Mod(var)234; Mod(var)224; Mod(var)177; Mod(var)1683; Mod(var)1658; Mod(…
GO:1903050	0.00123628	45.3036	0.0527431	2	42	regulation of proteolysis involved in cellular protein catabolic process	0.00381546	6	sgg; APC7; CkIalpha; REG; Usp2; Bub1; Rca1; Cks30A; CycE; Cdc23; Pomp; BubR1; CG15237; CSN4; Mad1; TER94; Fbl6; Mtor; PI31; DUBAI; mad2; Ufd1-like; CycA; rpr; Chro; alphaTub84B; alphaTub85E; CSN5; Mps1; Cdc16; crb; Bub3; dco; rod; Spt6; cof; l(3)63Fd; E(lz); mat(2)cell-J; Best1; CG34234; CG18508
GO:1903362	0.00123628	45.3036	0.0527431	2	42	regulation of cellular protein catabolic process	0.00381546	6	sgg; APC7; CkIalpha; REG; Usp2; Bub1; Rca1; Cks30A; CycE; Cdc23; Pomp; BubR1; CG15237; CSN4; Mad1; TER94; Fbl6; Mtor; PI31; DUBAI; mad2; Ufd1-like; CycA; rpr; Chro; alphaTub84B; alphaTub85E; CSN5; Mps1; Cdc16; crb; Bub3; dco; rod; Spt6; cof; l(3)63Fd; E(lz); mat(2)cell-J; Best1; CG34234; CG18508
GO:0007010	0.00124003	7.95256	0.870261	5	693	cytoskeleton organization	0.00381546	6	l(3)91Ce; scy; Rpb7; qvr; dpr1; rho-5; CG17778; CG13366; SkpA; RpL22; tw; DAAM; mei-38; sta; Scgdelta; arm; mip130; Ocrl; Actn; moody; Vinc; crn; PsGEF; egh; Klp3A; eIF3ga; PI4KIIIalpha; sgg; N; Vap-33A; cib; dgt4; ctp; spoon; RpL35; Act5C; sqh; Spx; swa; RpL7A; RpL17; C3G; pod1; nullo; CG10932; RpS6; sn; CG32039; CG32240; Or65a; CG32668; Moe; Rbm13; CG32820; Sdic3; rdgA; CG7033; CG31076; CG31321…
GO:0043902	0.00135634	43.1395	0.0552547	2	44	positive regulation of multi-organism process	0.0040188	6	Dredd; PGRP-SA; psh; Ntf-2; Spf45; Sec61alpha; Rack1; Tehao; cact; Dif; dl; cad; didum; Myd88; TER94; Def; Listericin; Dp; Diap2; Tab2; DMAP1; Pi3K59F; key; vvl; PGRP-LC; Atg1; Tak1; Lasp; Toll-9; Atg13; Rel; GILT1; Hel89B; E2f1; Fadd; GILT2; SPE; Tl; spz; Anp; Nc98F; Hs2st; ear; Tabp
GO:2001252	0.00161256	39.3758	0.0602778	2	48	positive regulation of chromosome organization	0.00427932	6	CG33269; G9a; trr; z; sgg; APC7; Bap60; Ada3; CoRest; ebi; Atxn7; Elba2; Bsg25A; Elba3; Su(var)205; Cks30A; piwi; esc; sna; Atac2; Cdc23; BubR1; mle; wde; cid; CG9754; Rtf1; Lpt; egg; Atf-2; scny; Su(var)3-3; Ada2b; Ibf2; Ibf1; HP1e; JHDM2; Sirt6; Tctp; Su(var)3-7; Cp190; cal1; HP1c; Cdc16; cof; l(3)63Fd; mat(2)cell-J; CG34234
GO:0045862	0.00167995	38.535	0.0615336	2	49	positive regulation of proteolysis	0.00427932	6	p38c; sgg; APC7; CkIalpha; Usp2; CG40498; Che-13; Cks30A; RnrL; Cul3; Cyt-c-d; lok; Cdc23; IKKepsilon; Pomp; TER94; Fbl6; PI31; RnrS; Tango7; Dark; hpo; ntc; MED24; Dronc; Ufd1-like; hid; grim; rpr; 7B2; HtrA2; CSN5; Mdh2; Fadd; Cdc16; Apc2; Drice; dco; Spt6; cof; Mkrn1; Inr-b; l(3)63Fd; mat(2)cell-J; Best1; HGTX; dbo; Jafrac1; CG34234
GO:0046328	0.00167995	38.535	0.0615336	2	49	regulation of JNK cascade	0.00427932	6	NA; SkpA; sgg; N; Rala; peb; hep; ben; MKP-4; ebi; cpb; CG41128; Traf4; Mnn1; Cka; ics; CG10176; Atg9; POSH; hppy; cpa; tRNA:CR31971; sigmar; Usp5; PGRP-LF; Tak1; cln3; park; cno; puc; stck; Mkk4; pyd; Lkb1; rdx; Mekk1; Ask1; PSR; XNP; ALiX; alph; Crk; syd; Rgl; hdp-b; l(2)31Aa; c; rex; SP1029
GO:0032270	0.00168174	15.1438	0.243623	3	194	positive regulation of cellular protein metabolic process	0.00427932	6	Gr98c; CG30480; CR40601; p38c; G9a; trr; Raf; sgg; tyf; MCTS1; raptor; APC7; CG3198; Dsor1; CDK2AP1; CkIalpha; hep; lic; ben; Rab3-GEF; CG32228; mbt; DENR; Ada3; upd1; fu; Mer; Usp2; ebi; Atxn7; Hrs; CG40498; vtd; CG41128; lt; Pp1-Y2; Che-13; Traf4; Fnta; mxt; betaggt-I; cort; Hrb27C; Fgop2; smt3; Caper; Mnn1; Ntl; Cka; Su(var)205; Pvr; Cks30A; RnrL; aub; esc; CG6686; p38b; Cul3; sna; fzy; chif; …
GO:0032872	0.00181871	36.9563	0.0640452	2	51	regulation of stress-activated MAPK cascade	0.00427932	6	NA; SkpA; sgg; N; Rala; peb; hep; ben; MKP-4; ebi; cpb; CG41128; Traf4; Mnn1; Cka; ics; CG10176; Dhx15; Atg9; POSH; slim; hppy; cpa; tRNA:CR31971; sigmar; Usp5; PGRP-LF; Tak1; cln3; park; cno; puc; stck; Mkk4; pyd; Lkb1; rdx; Mekk1; Ask1; PSR; XNP; ALiX; alph; Crk; syd; Rgl; hdp-b; l(2)31Aa; c; rex; SP1029
GO:0070302	0.00181871	36.9563	0.0640452	2	51	regulation of stress-activated protein kinase signaling cascade	0.00427932	6	NA; SkpA; sgg; N; Rala; peb; hep; ben; MKP-4; ebi; cpb; CG41128; Traf4; Mnn1; Cka; ics; CG10176; Dhx15; Atg9; POSH; slim; hppy; cpa; tRNA:CR31971; sigmar; Usp5; PGRP-LF; Tak1; cln3; park; cno; puc; stck; Mkk4; pyd; Lkb1; rdx; Mekk1; Ask1; PSR; XNP; ALiX; alph; Crk; syd; Rgl; hdp-b; l(2)31Aa; c; rex; SP1029
GO:0071900	0.00181871	36.9563	0.0640452	2	51	regulation of protein serine/threonine kinase activity	0.00427932	6	Cht12; CG16903; sgg; Cdk7; hep; lic; Rab3-GEF; mbt; MKP-4; Traf4; cort; Wee1; smt3; Cks30A; CycY; ics; fzy; step; dap; Mat1; Fak; PTP-ER; CG33668; mi; fzr2; Ptp61F; ago; Cdc27; btl; Tak1; Mkp3; wnd; CycH; puc; ato; Mkk4; CG6345; eff; CSN5; bnl; Ask1; CycB3; alph; CG15528; BG642312; Inr-A; Rgl; cof; c; red; ACXE
GO:0051247	0.00191489	14.4519	0.254925	3	203	positive regulation of protein metabolic process	0.00437689	6	Gr98c; CG30480; CR40601; p38c; G9a; trr; Raf; sgg; tyf; MCTS1; raptor; APC7; CG3198; Dsor1; CDK2AP1; CkIalpha; hep; lic; ben; Rab3-GEF; CG32228; mbt; DENR; Ada3; upd1; fu; Mer; Usp2; ebi; Atxn7; Hrs; CG40498; vtd; CG41128; lt; Pp1-Y2; Che-13; Traf4; Fnta; mxt; betaggt-I; Fbw5; cort; Hrb27C; Fgop2; smt3; Caper; Mnn1; Ntl; Cka; Su(var)205; Pvr; Cks30A; RnrL; aub; l(2)gd1; esc; CG6686; p38b; Cul3; s…
GO:0051130	0.0021674	13.8197	0.266227	3	212	positive regulation of cellular component organization	0.00481644	6	CG30177; CG33269; G9a; DAAM; Pgam5; trr; pn; PsGEF; z; sgg; lva; norpA; Top3beta; Marf; APC7; Pink1; CG32240; Crag; Ppt1; Moe; Imp; dsh; dlg1; nod; prtp; cac; Bap60; Grip128; Chc; caz; Arp2; Arpc3B; par-6; mnb; Ada3; Wnt5; CoRest; Grip84; Tao; Cdc42; smo; AP-2alpha; ebi; cpb; Sec24CD; Atxn7; Elba2; Arpc5; Drp1; Syt1; Mad; CG40485; Sec5; capu; Bsg25A; Elba3; tkv; chic; Arpc4; smt3; Su(var)205; Cks…
GO:0042176	0.00226663	32.9091	0.0715799	2	57	regulation of protein catabolic process	0.00490082	6	sgg; APC7; CkIalpha; REG; Usp2; Bub1; Fbw5; Rca1; Cks30A; l(2)gd1; CycE; Rpn3; Cdc23; Pomp; gus; BubR1; CG15237; CSN4; Cul4; Su(var)2-10; Mad1; TER94; Fbl6; Mtor; PI31; DUBAI; Fsn; mad2; Ufd1-like; CycA; rpr; Lon; Rpn1; SAK; Chro; ctrip; alphaTub84B; alphaTub85E; pic; CSN5; Mps1; Bdbt; Cdc16; Apc2; crb; Rpn2; Bub3; dco; rod; Spt6; cof; l(3)63Fd; E(lz); mat(2)cell-J; Best1; CG34234; CG18508
GO:0031331	0.00234586	32.3189	0.0728357	2	58	positive regulation of cellular catabolic process	0.00493866	6	p38c; sgg; APC7; Traf6; Upf1; CkIalpha; Tis11; hep; Atg101; Usp2; Atg4a; GlyP; ND-AGGG; CG40485; Cks30A; Utx; piwi; aub; Uvrag; Cdc23; Pomp; TER94; Fbl6; Buffy; PI31; Atg9; Atg7; Toll-7; Dcp-1; S6k; smg; Ufd1-like; Atg1; hid; rpr; gig; PEK; pum; Sbf; GlyS; spn-E; CSN5; Cdc16; Lsd-1; Tsc1; Lerp; Atg14; sima; dco; nero; Spt6; cof; c; l(3)63Fd; mat(2)cell-J; Best1; Dhap-at; CG34234
GO:0007254	0.00311716	27.8242	0.0841378	2	67	JNK cascade	0.00639418	6	l(3)cl-R3; NA; SkpA; sgg; N; Rala; peb; hep; ben; MKP-4; Cdc42; ebi; cbt; cpb; aop; CG41128; Traf4; Mnn1; Cka; Btk29A; ics; CG10176; Src42A; Gadd45; egr; Jra; Rho1; Atg9; POSH; hppy; cpa; CG33668; tRNA:CR31971; sigmar; Rac1; Usp5; Rac2; PGRP-LF; Tak1; cln3; park; cno; puc; stck; Mkk4; pyd; Lkb1; rdx; Mekk1; Ask1; PSR; XNP; Mtl; ALiX; alph; Crk; syd; Inr-A; hty; Rgl; hdp-b; biz; l(2)31Aa; c; rex; …
GO:0009896	0.00320927	27.4004	0.0853936	2	68	positive regulation of catabolic process	0.00641855	6	p38c; sgg; APC7; Traf6; Upf1; CkIalpha; Tis11; hep; Atg101; Usp2; Atg4a; GlyP; ND-AGGG; CG40485; Fbw5; Cks30A; Utx; piwi; aub; l(2)gd1; Uvrag; Cdc23; Pomp; gus; Cul4; TER94; Fbl6; Buffy; PI31; Fsn; Atg9; Atg7; Toll-7; Dcp-1; S6k; smg; Ufd1-like; Atg1; hid; rpr; Lon; gig; SAK; ctrip; PEK; pum; Sbf; pic; GlyS; spn-E; CSN5; Cdc16; Lsd-1; Tsc1; Apc2; Lerp; Atg14; sima; dco; nero; Spt6; cof; c; l(3)63…
GO:0051403	0.00339731	26.5903	0.0879052	2	70	stress-activated MAPK cascade	0.00662889	6	l(3)cl-R3; NA; SkpA; sgg; N; Rala; peb; hep; ben; MKP-4; Cdc42; ebi; cbt; cpb; aop; CG41128; Traf4; Mnn1; Cka; Btk29A; ics; CG10176; Src42A; Gadd45; Dhx15; egr; Jra; Rho1; Atg9; POSH; slim; hppy; cpa; CG33668; tRNA:CR31971; sigmar; Atf-2; Rac1; Usp5; Rac2; PGRP-LF; Tak1; cln3; park; cno; puc; stck; Mkk4; pyd; Lkb1; rdx; Mekk1; Ask1; PSR; XNP; Mtl; ALiX; alph; Crk; syd; Inr-A; hty; Rgl; hdp-b; biz…
GO:0031098	0.00368885	25.4608	0.0916726	2	73	stress-activated protein kinase signaling cascade	0.00702637	6	l(3)cl-R3; NA; SkpA; sgg; N; Rala; peb; Dok; Traf6; hep; ben; MKP-4; Cdc42; ebi; cbt; cpb; aop; CG41128; Traf4; Mnn1; Cka; Btk29A; CYLD; ics; CG10176; Src42A; Gadd45; Dhx15; egr; Jra; Rho1; Atg9; POSH; slim; hppy; cpa; CG33668; tRNA:CR31971; sigmar; Atf-2; Rac1; Usp5; Rac2; PGRP-LF; Tak1; cln3; park; cno; puc; stck; Mkk4; pyd; Lkb1; rdx; Mekk1; Ask1; PSR; XNP; Mtl; ALiX; alph; Crk; syd; Inr-A; ht…
GO:0007051	0.00394776	11.1072	0.329017	3	262	spindle organization	0.00728862	6	rho-5; RpL22; mei-38; sta; mip130; Klp3A; eIF3ga; sgg; dgt4; RpL35; Spx; RpL7A; RpL17; CG10932; RpS6; CG32039; CG32668; Moe; Rbm13; CG7033; feo; Klp10A; Dlic; nod; wisp; Ndc80; Grip128; Tcp-1zeta; Myb; U2af50; eIF-2alpha; SNRPG; Axs; RpS5a; Grip84; mst; U2af38; CG7337; sau; Cwc25; gammaTub23C; toc; Dbp80; Dim1; RpL27A; Hel25E; eIF-4a; ifc; Wee1; smt3; snRNP-U1-70K; Nuf2; RpL36A; Pvr; mtsh; RpS13;…
GO:0016043	0.00400874	4.33266	3.66816	9	2921	cellular component organization	0.00728862	6	clt; Gr98c; Gpi1; CG32396; TotZ; CG43133; Mst77Y-7; Mst77Y-8; Su(E1)-A; CR44237; disjointed; CR44555; ATP6; l(1)1Bb; l(4)7-M484; l(4)7-M1365; CG33939; CG33946; CG30037; CG30080; NT5E-2; CG30172; CG30177; CG30323; Opbp; mot-32l; l(3)91Ce; scy; Bm; ch; fdg; Fs(2)Etr; mei-S8; mei-S282; m(Est-6); mit(1)3; mit(1)4; mit(1)5; mit(1)6; mit(1)7; mit(1)8; mit(1)9; mit(1)10; mit(1)11; mit(1)12; mit(1)13; mi…
GO:0003002	0.00418255	7.40693	0.693195	4	552	regionalization	0.00743564	6	clt; ale; bd; blt; l(1)air13; fs(4)34; zpg; CR40601; dpr1; CG32318; vnd; DAAM; arm; Raf; gt; boi; sgg; crm; N; bi; peb; ovo; spoon; sqh; swa; dx; Pat1; Nf-YC; Atx-1; brk; sn; fs(1)h; CG32017; oc; Lim1; Moe; CG31076; Dsor1; lz; btd; sev; dsh; hop; CkIIbeta; SelG; gd; tsg; hep; lic; mew; NetB; Grip128; sog; Chc; exd; disco; CG31773; baz; f; B-H2; B-H1; Vps4; upd2; upd1; Wnt5; Bx; fu; Hs3st-B; dome;…
GO:1903047	0.00431998	7.33695	0.699474	4	557	mitotic cell cycle process	0.00744263	6	Gr98c; CR44047; m(Est-6); mit(1)3; mit(1)4; mit(1)5; mit(1)6; mit(1)7; mit(1)8; mit(1)9; mit(1)10; mit(1)11; mit(1)12; mit(1)13; mit(1)14; mit(1)17; Res; CR40601; CG33337; CheB42a; rho-5; ase; CG17778; SkpA; RpL22; Rbf; MED22; mus81; CDC45L; mei-38; sta; mip130; Ocrl; ph-p; Klp3A; eIF3ga; sgg; fs(1)Ya; ttm50; N; dgt4; mei-9; ctp; Cdk7; Mcm3; RpL35; Act5C; rux; CG5921; sqh; Spx; PpV; RpL7A; APC7; …
GO:0009887	0.00437254	5.85308	1.15784	5	922	organ morphogenesis	0.00744263	6	Gr98b; FASN2; Ranbp16; flash-flood; oak-gall; spikes; sprout; steeple; wavy-lumens; wobbly-lumens; CR43961; CR44611; CG44385; CG44405; CR44555; CG30172; CG30480; mor(1)9; aperA; Fs(2)Etr; CG32236; Rst(2)chl; l(1)18; mu; l(3)08034; Adv; E(sev)3D; bleg; Proc; pfy; l(3)C416; l(3)C101; l(3)113; rdm; rets; dpr1; CG33259; CG33269; ewg; ac; sc; pcl; ase; svr; CG13366; sdk; CG11382; trr; arm; pn; Raf; bo…
GO:0071840	0.0046865	4.21184	3.74853	9	2985	cellular component organization or biogenesis	0.00781083	6	clt; Gr98c; Gpi1; CG32396; TotZ; CG43133; Mst77Y-7; Mst77Y-8; Su(E1)-A; CR44237; disjointed; CR44555; ATP6; l(1)1Bb; l(4)7-M484; l(4)7-M1365; CG33939; CG33946; CG30037; CG30080; NT5E-2; CG30172; CG30177; CG30323; Opbp; mot-32l; l(3)91Ce; scy; Bm; ch; fdg; Fs(2)Etr; mei-S8; mei-S282; m(Est-6); mit(1)3; mit(1)4; mit(1)5; mit(1)6; mit(1)7; mit(1)8; mit(1)9; mit(1)10; mit(1)11; mit(1)12; mit(1)13; mi…
GO:0007143	0.00508189	21.4983	0.107998	2	86	female meiotic division	0.00813103	6	l(1)1Bb; l(4)7-M484; l(4)7-M1365; CG33939; CG33946; mei-S8; m(Est-6); CR40005; mei-38; wapl; Klp3A; sgg; mei-9; dhd; Klp10A; nod; bif; wisp; mamo; Grip128; mei-41; Pp2B-14D; Axs; Fim; corolla; lwr; Rab5; oaf; HP6; cup; cort; Cks30A; Grip75; Gli; twe; fzy; grp; Grip71; gammaTub37C; Mcm10; Hr39; BubR1; Incenp; sca; cnn; SRPK; mei-S332; ord; His2B:CG33872; Cec-Psi1; wac; RfC4; pav; Myt1; LanA; mus30…
GO:0045859	0.00508189	21.4983	0.107998	2	86	regulation of protein kinase activity	0.00813103	6	Cht12; CG33502; CG5541; Ste:CG33242; Ste:CG33241; Ste:CG33240; Ste:CG33239; Ste:CG33238; CG33252; Ste:CG33247; Ste:CG33245; CG3857; CG15744; CG16903; sgg; Cdk7; hep; lic; Rab3-GEF; CG32228; mbt; par-6; upd1; MKP-4; l(2)gl; Traf4; cort; Wee1; smt3; Cks30A; CycY; kek1; ics; fzy; chif; Dap160; step; alc; dap; Mat1; drk; pcs; CG8060; Fak; ASPP; PTP-ER; CG33668; mi; fzr2; Rac1; Ptp61F; ago; Cdc27; Cbl…
GO:0043549	0.00519766	21.2437	0.109254	2	87	regulation of kinase activity	0.0081532	6	Cht12; CG33502; CG5541; Ste:CG33242; Ste:CG33241; Ste:CG33240; Ste:CG33239; Ste:CG33238; CG33252; Ste:CG33247; Ste:CG33245; CG3857; CG15744; CG16903; sgg; Cdk7; hep; lic; Rab3-GEF; CG32228; mbt; par-6; upd1; MKP-4; l(2)gl; Traf4; cort; Wee1; smt3; Cks30A; CycY; kek1; ics; fzy; chif; Dap160; step; alc; dap; Mat1; drk; pcs; CG8060; Fak; ASPP; PTP-ER; CG33668; mi; fzr2; Rac1; Ptp61F; ago; Cdc27; Cbl…
GO:0000186	0.00626417	212.017	0.00627894	1	5	activation of MAPKK activity	0.00864024	6	Tak1; wnd; Ask1; Rgl; ACXE
GO:0002237	0.00626417	212.017	0.00627894	1	5	response to molecule of bacterial origin	0.00864024	6	PGRP-SA; Dscam1; POSH; Tak1; Stat92E
GO:0009949	0.00626417	212.017	0.00627894	1	5	polarity specification of anterior/posterior axis	0.00864024	6	CG31076; mus301; spn-B; spn-E; spn-A
GO:0040019	0.00626417	212.017	0.00627894	1	5	positive regulation of embryonic development	0.00864024	6	ben; didum; nopo; Lasp; stg
GO:0051305	0.00626417	212.017	0.00627894	1	5	chromosome movement towards spindle pole	0.00864024	6	Klp10A; Kmn1; CycB; Mis12; Klp67A
GO:0051382	0.00626417	212.017	0.00627894	1	5	kinetochore assembly	0.00864024	6	cid; mars; Spc105R; Cenp-C; cal1
GO:2000779	0.00626417	212.017	0.00627894	1	5	regulation of double-strand break repair	0.00864024	6	CG4078; Cap-D3; Rev1; Blm; spn-A
GO:0008298	0.00642185	18.9925	0.121811	2	97	intracellular mRNA localization	0.00870759	6	zpg; CR40601; dpr1; spoon; swa; Pat1; CG31076; CkIIbeta; wisp; Grip128; Chc; Mer; Syt1; okr; capu; chic; cup; Hrb27C; Rbsn-5; Pka-C1; Grip75; aub; Ge-1; Rab6; cni; BicD; didum; tsu; TER94; SmD3; Nacalpha; Lis-1; csul; Khc; POSH; stau; exu; mago; tud; egl; DCP1; klar; Hsp83; armi; Rop; Dhc64C; Rac2; mus301; blue; D; Lasp; mael; lost; eIF4AIII; osk; rump; glo; sqd; Lkb1; spn-B; Tm1; spn-E; msps; mi…
GO:0000070	0.00681241	18.4067	0.125579	2	100	mitotic sister chromatid segregation	0.00908321	6	CR40601; CheB42a; ph-p; sgg; APC7; Moe; APC4; CG31674; CG31698; Hmr; Klp10A; Kmn1; Ndc80; Sk2; SMC3; mst; gammaTub23C; toc; CG3326; Dbp80; CG17883; Spindly; Bub1; Cap-D3; SA; Nuf2; Cks30A; pim; aurB; aub; Orc5; glu; Top2; barr; neb; Cdc23; BubR1; CG15237; Mad1; Mtor; Cap-G; cid; Su(var)2-HP2; SMC2; Lhr; APC10; thr; prod; Nnf1a; CycB; Klp59C; snoRNA:Psi28S-2566; Slik; RfC4; Dhc64C; Sse; mad2; Rcc1…
GO:0000278	0.00707458	6.33595	0.803705	4	640	mitotic cell cycle	0.00916818	6	Gr98c; CR44047; m(Est-6); mit(1)3; mit(1)4; mit(1)5; mit(1)6; mit(1)7; mit(1)8; mit(1)9; mit(1)10; mit(1)11; mit(1)12; mit(1)13; mit(1)14; mit(1)17; Res; CR40601; CG33337; CheB42a; rho-5; CG33269; ac; sc; ase; CG17778; SkpA; RpL22; Rbf; MED22; mus81; CDC45L; png; mei-38; sta; mip130; Ocrl; ph-p; Klp3A; eIF3ga; sgg; fs(1)Ya; ttm50; N; dgt4; mei-9; ctp; Cdk7; Mcm3; RpL35; Act5C; rux; CG5921; sqh; S…
GO:0042051	0.00734966	17.6793	0.130602	2	104	compound eye photoreceptor development	0.00916818	6	CR44555; CG30172; Fs(2)Etr; CG32236; Rst(2)chl; l(1)18; N; GAA1; oc; Moe; lz; sev; CG31102; CG31200; mbt; Vps4; Rip11; Pph13; S; aop; lilli; vtd; bdl; rau; Kr-h1; PDZ-GEF; eya; Cka; EMC3; Rab6; dac; CadN; CadN2; hook; spi; Lar; vimar; p47; didum; CG1868; TER94; Hdc; stan; CG7759; jeb; CG8378; Cam; Amph; Nrk; phyl; SP2353; Lis-1; Syn2; mbl; POSH; grh; pAbp; Sec6; gdl-ORF39; 5SrRNA:CR33428; tsr; rn…
GO:0009951	0.00751258	169.6	0.00753473	1	6	polarity specification of dorsal/ventral axis	0.00916818	6	CG31076; sel; mus301; spn-B; spn-E; spn-A
GO:0065001	0.00751258	169.6	0.00753473	1	6	specification of axis polarity	0.00916818	6	CG31076; sel; mus301; spn-B; spn-E; spn-A
GO:1903431	0.00751258	169.6	0.00753473	1	6	positive regulation of cell maturation	0.00916818	6	ctp; didum; Dhc64C; Lasp; spn-F; c
GO:0042462	0.00762531	17.3365	0.133114	2	106	eye photoreceptor cell development	0.00916818	6	CR44555; CG30172; Fs(2)Etr; CG32236; Rst(2)chl; l(1)18; N; GAA1; oc; Moe; lz; sev; CG31102; CG31200; mbt; Vps4; Rip11; Pph13; S; aop; lilli; vtd; bdl; rau; Kr-h1; PDZ-GEF; eya; Cka; EMC3; Rab6; dac; CadN; CadN2; hook; spi; Lar; vimar; p47; didum; CG1868; TER94; Hdc; stan; CG7759; jeb; CG8378; Cam; Amph; Nrk; phyl; SP2353; Lis-1; Syn2; mbl; POSH; grh; pAbp; Sec6; gdl-ORF39; 5SrRNA:CR33428; tsr; rn…
GO:0048522	0.00767835	5.0699	1.32109	5	1052	positive regulation of cellular process	0.00916818	6	CR42874; Gr98c; CR44683; CG30177; CG30480; rets; CR40601; NA; p38c; Cyp12d1-d; CG33462; dpr1; AlkB; CG33259; CG13064; CG33269; G9a; ewg; ac; sc; l(1)sc; ase; vnd; Dredd; SkpA; CDC45L; DAAM; CG14812; Pgam5; trr; arm; usp; CG3630; pn; CG3071; Raf; PsGEF; boi; z; Pdfr; Tsp3A; sgg; N; Myc; ec; lva; tyf; norpA; CHOp24; ctp; Bteb2; ovo; Vsx1; mof; MCTS1; raptor; Top3beta; Rpt4; Marf; dx; APC7; Cdc7; CG…
GO:0051338	0.0080475	16.8465	0.136881	2	109	regulation of transferase activity	0.00939263	6	CG31381; Cht12; CG33502; CG5541; Ste:CG33242; Ste:CG33241; Ste:CG33240; Ste:CG33239; Ste:CG33238; CG33252; Ste:CG33247; Ste:CG33245; CG3857; CG15744; CG16903; sgg; Cdk7; hep; lic; Rab3-GEF; CG32228; mbt; par-6; upd1; MKP-4; l(2)gl; Traf4; Bub1; cort; Rca1; Wee1; smt3; Cks30A; CycY; kek1; ics; CycE; fzy; chif; Nedd8; Dap160; step; BubR1; CG15237; alc; Mad1; dap; Mat1; Mtor; drk; pcs; CG8060; Fak; …
GO:0010638	0.00833474	16.5347	0.139393	2	111	positive regulation of organelle organization	0.00939263	6	CG33269; G9a; DAAM; Pgam5; trr; pn; z; sgg; Marf; APC7; Pink1; CG32240; nod; Bap60; Grip128; Arp2; Arpc3B; Ada3; CoRest; Grip84; ebi; Atxn7; Elba2; Arpc5; Drp1; Syt1; CG40485; Sec5; capu; Bsg25A; Elba3; Arpc4; Su(var)205; Cks30A; Grip75; SCAR; piwi; esc; aret; Arpc1; sna; CG18109; GMF; Atac2; Arpc2; Cdc23; dia; BubR1; mle; Pld; dpn; mlt; wde; wash; cid; Opa1; stau; CG9754; Vrp1; Rtf1; Lpt; Pgam5-…
GO:0006282	0.00875953	141.322	0.00879052	1	7	regulation of DNA repair	0.00939263	6	p38c; CG4078; Cap-D3; lok; Rev1; Blm; spn-A
GO:0007249	0.00875953	141.322	0.00879052	1	7	I-kappaB kinase/NF-kappaB signaling	0.00939263	6	N; Traf6; Su(H); kappaB-Ras; Tak1; slmb; Pkc98E
GO:0034508	0.00875953	141.322	0.00879052	1	7	centromere complex assembly	0.00939263	6	cid; mars; tRNA:G3:35Be; HipHop; Spc105R; Cenp-C; cal1
GO:0045003	0.00875953	141.322	0.00879052	1	7	double-strand break repair via synthesis-dependent strand annealing	0.00939263	6	CG33226; mei-41; okr; Blm; Fancm; spn-A; eIF-1A
GO:0043408	0.00877422	16.088	0.14316	2	114	regulation of MAPK cascade	0.00939263	6	CG30480; NA; SkpA; Raf; sgg; N; Rala; peb; RhoGAP5A; CG3198; Dsor1; hep; lic; ben; Rab3-GEF; mbt; MKP-4; ebi; cpb; vtd; CG41128; lt; Traf4; Fnta; betaggt-I; Fgop2; smt3; Caper; Mnn1; Cka; Pvr; CG6686; ics; heix; CG10176; Nf-YB; sNPF; step; Mob4; Dhx15; CG1603; 14-3-3zeta; jeb; CG8878; Mos; drk; Atg9; cnk; POSH; slim; Prp19; hppy; Fak; cpa; mago; PTP-ER; tRNA:CR31971; sigmar; Ptp61F; Cdc37; Usp5; …
GO:0000819	0.008923	15.9444	0.144416	2	115	sister chromatid segregation	0.00939263	6	CR40005; CR40601; CheB42a; ph-p; wapl; sgg; APC7; Trf4-1; Moe; APC4; CG31674; CG31698; Hmr; Klp10A; Kmn1; Ndc80; Krn; Sk2; SMC3; mst; gammaTub23C; toc; CG3326; Dbp80; CG17883; Spindly; Bub1; Cap-D3; SA; Nuf2; aust; Cks30A; pim; aurB; aub; Orc5; glu; Top2; barr; neb; Cdc23; BubR1; CG15237; Incenp; Mad1; Mtor; pds5; Cap-G; cid; Su(var)2-HP2; SMC2; Lhr; APC10; thr; prod; Nnf1a; mei-S332; CycB; Klp59…
GO:0033044	0.008923	15.9444	0.144416	2	115	regulation of chromosome organization	0.00939263	6	CG33269; G9a; trr; z; sgg; Parg; mof; APC7; Moe; HP1b; APC4; CG31698; Bap60; mamo; Ada3; CoRest; e(y)3; ebi; Atxn7; Elba2; Spindly; Bsg25A; Elba3; Bub1; LKRSDH; Su(var)205; Cks30A; Utx; piwi; Samuel; crol; esc; Sirt1; sna; Atac2; msl-1; Cdc23; BubR1; mle; Bap170; CG15237; Mad1; psq; wde; Mtor; cid; APC10; CG9754; Rtf1; snoRNA:Psi28S-2566; CG33766; 5SrRNA:CR33373; Ssrp; Lpt; Slik; egg; Atf-2; dre4…
GO:0001745	0.00917127	8.11167	0.445805	3	355	compound eye morphogenesis	0.0095286	6	FASN2; Ranbp16; CR44555; CG30172; CG30480; mor(1)9; Fs(2)Etr; CG32236; Rst(2)chl; l(1)18; l(3)08034; l(3)C416; l(3)C101; l(3)113; rdm; rets; sdk; trr; arm; pn; boi; rst; kirre; N; Rala; ec; norpA; bi; peb; GAA1; oc; Moe; lz; sev; dsh; hop; fw; sd; Chc; CG31102; CG31200; CG32228; mbt; B-H2; B-H1; Vps4; upd1; Rip11; Hs3st-B; dome; Mer; S6kII; ebi; ex; Pph13; ds; S; ast; aop; dpp; lilli; Mad; vtd; C…
GO:0060255	0.00949566	4.25687	1.98163	6	1578	regulation of macromolecule metabolic process	0.0096501	6	snoRNA:Or-CD9b; CR42874; clt; Gr98c; mir-2a-2; CR44197; CG31381; CR45594; CR44767; CR44683; CG30087; Cht12; CG30480; CG30497; l(1)L25.7; CR40601; NA; Mod(var)E646; Mod(var)E226; Mod(var)E1672; Mod(var)E1451; Mod(var)E1377; Mod(var)E1350; Mod(var)E1275; Mod(var)E1261; Mod(var)E1178; Mod(var)E113; Mod(var)E1060; Mod(var)E1047; Mod(var)600; Mod(var)26; Mod(var)242; Mod(var)234; Mod(var)224; Mod(var)…
GO:0030162	0.00952948	15.3944	0.149439	2	119	regulation of proteolysis	0.0096501	6	CR44197; p38c; CG14812; sgg; APC7; CkIalpha; REG; fu; Usp2; ebi; CG40498; Che-13; Bub1; Rca1; Spn28B; Spn28Da; Spn28Dc; Cks30A; RnrL; Pde1c; Cul3; CycE; fzy; Cyt-c-d; Nedd8; lok; Cdc23; IKKepsilon; Pomp; BubR1; CG15237; Spn42Db; Spn42Dc; Spn42De; cos; CSN4; Mad1; TER94; sel; Fbl6; Mtor; PI31; RnrS; DUBAI; Tango7; Asx; Diap2; casp; Dark; cer; hpo; tRNA:CR31971; 5SrRNA:CR33372; Acp62F; ntc; ago; ma…
GO:0042461	0.00983949	15.1333	0.15195	2	121	photoreceptor cell development	0.00983949	6	CR44555; CG30172; Fs(2)Etr; CG32236; Rst(2)chl; l(1)18; N; peb; GAA1; oc; Moe; lz; CG43394; sev; ben; CG31102; CG31200; mbt; baz; Vps4; Rip11; ebi; Pph13; S; aop; lilli; vtd; bdl; rau; Kr-h1; PDZ-GEF; eya; Cka; EMC3; Rab6; dac; CadN; CadN2; hook; spi; Lar; EcR; vimar; p47; didum; CG1868; TER94; Hdc; stan; CG7759; jeb; CG8378; Cam; Amph; Nrk; cnn; phyl; SP2353; Lis-1; Syn2; mbl; POSH; grh; pAbp; S…
GO:0007305	1.10431e-07	530	0.0105957	3	15	vitelline membrane formation involved in chorion-containing eggshell formation	1.17793e-06	8	Cp36; Vm26Ab; Vm26Ac; Vm26Aa; psd; Vm32E; Vm34Ca; polybromo; Cad99C; mbd; gat; Muc26B; Fs(2)Vaj; snoRNA:Me28S-A2113; snoRNA:Psi18S-1389b
GO:0030704	1.10431e-07	530	0.0105957	3	15	vitelline membrane formation	1.17793e-06	8	Cp36; Vm26Ab; Vm26Ac; Vm26Aa; psd; Vm32E; Vm34Ca; polybromo; Cad99C; mbd; gat; Muc26B; Fs(2)Vaj; snoRNA:Me28S-A2113; snoRNA:Psi18S-1389b
GO:0035803	1.10431e-07	530	0.0105957	3	15	egg coat formation	1.17793e-06	8	Cp36; Vm26Ab; Vm26Ac; Vm26Aa; psd; Vm32E; Vm34Ca; polybromo; Cad99C; mbd; gat; Muc26B; Fs(2)Vaj; snoRNA:Me28S-A2113; snoRNA:Psi18S-1389b
GO:0085029	2.76196e-07	373.971	0.0141276	3	20	extracellular matrix assembly	2.20957e-06	8	Cp36; Crag; Vm26Ab; Vm26Ac; Vm26Aa; psd; LanB1; loh; Vm32E; Vm34Ca; LanB2; polybromo; SPARC; Cad99C; mbd; gat; Muc26B; Fs(2)Vaj; snoRNA:Me28S-A2113; snoRNA:Psi18S-1389b
GO:0030198	2.75978e-06	162.731	0.029668	3	42	extracellular matrix organization	1.76626e-05	8	PI4KIIIalpha; Cp36; Crag; hep; Pis; Chc; wus; obst-A; Sec24CD; Vm26Ab; Vm26Ac; Vm26Aa; psd; mmy; LanB1; loh; Vm32E; Vm34Ca; pgant3; Mmp2; sktl; Mmp1; Pxn; Mp; LanB2; Sec23; Timp; AdamTS-A; polybromo; CG5455; SPARC; Cad99C; gammaCOP; Ppn; jbug; slm; mbd; gat; Muc26B; Fs(2)Vaj; snoRNA:Me28S-A2113; snoRNA:Psi18S-1389b
GO:0043062	7.76825e-06	113.179	0.0416765	3	59	extracellular structure organization	4.14307e-05	8	PI4KIIIalpha; Cp36; Crag; hep; Pis; Chc; rngo; wus; obst-A; Sec24CD; Hsp60C; Vm26Ab; Vm26Ac; Vm26Aa; psd; mmy; LanB1; Btk29A; Pen; loh; Vm32E; Vm34Ca; kel; pgant3; scra; Mmp2; pcs; hts; sktl; Mmp1; Pxn; Dhc64C; Mp; LanB2; polo; Sec23; Timp; AdamTS-A; cher; Cortactin; polybromo; CG5455; SPARC; Cad99C; cindr; gammaCOP; Ppn; jbug; hdp-b; prd1; slm; mbd; gat; Su(Gl)27; l(3)85Ai; Muc26B; Fs(2)Vaj; sno…
GO:0007304	0.000112996	44.6489	0.101719	3	144	chorion-containing eggshell formation	0.000470879	8	Rbf; mip130; N; CG15571; Femcoat; Muc4B; spoon; Cdc7; Mcm6; dec-1; Cp7Fb; Cp7Fc; Cp36; Cp38; CG15721; CG12716; hep; Muc12Ea; Myb; kat80; Cyp18a1; Cdc42; CG31661; dpp; okr; capu; ed; tkv; H15; mid; Vm26Ab; Vm26Ac; Vm26Aa; psd; smt3; grk; CG13113; CG12517; aub; Vm32E; zuc; bun; Vm34Ca; CycE; cni; cact; chif; Pax; Fs(2)Ket; gus; geminin; tor; sax; Cul4; Jra; RanBPM; Dp; mip120; Lis-1; Khc; mip40; PC…
GO:0030703	0.00011772	44.0175	0.103132	3	146	eggshell formation	0.000470879	8	Rbf; mip130; N; CG15571; Femcoat; Muc4B; spoon; Cdc7; Mcm6; dec-1; Cp7Fb; Cp7Fc; Cp36; Cp38; CG15721; CG12716; hep; Muc12Ea; Myb; kat80; Cyp18a1; Cdc42; CG31661; dpp; okr; capu; ed; tkv; H15; mid; Vm26Ab; Vm26Ac; Vm26Aa; psd; smt3; grk; CG13113; CG12517; aub; Vm32E; zuc; bun; Vm34Ca; CycE; cni; cact; chif; Pax; Fs(2)Ket; gus; geminin; tor; sax; Cul4; Jra; RanBPM; Dp; mip120; Lis-1; Khc; mip40; 18…
GO:0007362	0.000142897	151.286	0.0183659	2	26	terminal region determination	0.000508079	8	Raf; gt; peb; fs(1)h; Dsor1; tsg; sog; fog; ush; bowl; trk; tup; tor; hkb; hb; tsl; pnt; tld; tll; cv-2; Lsp2; mbd; gat; l(1)1Ac; cmet; snoRNA:Me28S-A2113
GO:0007354	0.000231558	117.06	0.0233106	2	33	zygotic determination of anterior/posterior axis, embryo	0.000740985	8	Raf; gt; peb; fs(1)h; oc; Dsor1; tsg; sog; fog; ush; dpp; bowl; trk; tup; tor; Kr; kni; hkb; bcd; hb; osk; tsl; pnt; tld; tll; cv-2; Lsp2; mbd; gat; Nc18A; l(1)1Ac; cmet; snoRNA:Me28S-A2113
GO:0010927	0.000400346	28.7018	0.15611	3	221	cellular component assembly involved in morphogenesis	0.00116464	8	CG13366; tw; Rbf; DAAM; Scgdelta; mip130; Actn; N; CG15571; Femcoat; Muc4B; spoon; Cdc7; Mcm6; C3G; dec-1; Cp36; Cp38; Kap3; hep; up; Myb; kat80; if; wupA; Cdc42; fd19B; unc; fliI; tilB; CG17599; BBS8; rempA; CG31661; CG10874; dpp; okr; Che-13; slp1; slp2; ed; CG13999; Vm26Ab; Vm26Ac; Vm26Aa; psd; Osm6; smt3; grk; CG13113; porin; aub; Vm32E; zuc; aret; bun; CG5142; CG5458; Vm34Ca; CycE; cni; cact…
GO:0009798	0.000588017	25.0663	0.178008	3	252	axis specification	0.00156805	8	Raf; gt; N; peb; spoon; swa; Pat1; fs(1)h; oc; Moe; Dsor1; sev; CkIIbeta; gd; tsg; lic; Grip128; sog; Chc; baz; par-6; Wnt5; Mer; cactin; fog; l(2)gl; ush; lwr; dpp; Syt1; bowl; slp1; capu; chic; eIF-4a; cup; Hrb27C; Wnt4; wg; Wnt6; Wnt10; Rbsn-5; grk; Pka-C1; trk; Grip75; aub; Ge-1; Rab6; Sos; sna; cni; cact; dl; BicD; tup; gammaTub37C; vls; IKKepsilon; cad; E2f2; gus; didum; tor; sax; lig; gcl;…
GO:0030707	0.00164213	17.382	0.253591	3	359	ovarian follicle cell development	0.00370346	8	Rbf; dor; arm; mip130; usp; ph-p; Raf; egh; Tsp3A; sgg; fs(1)Yb; N; Rala; brn; CG15571; Femcoat; Muc4B; spoon; sqh; Rpt4; pigs; Cdc7; Mcm6; dec-1; Cp7Fb; Cp7Fc; Cp36; Cp38; Dsor1; Ptpmeg2; spri; dsh; hop; dlg1; Evi5; Smr; CG15721; CG12716; hep; jub; Muc12Ea; Myb; kat80; sl; if; baz; par-6; e(y)1; upd1; phm; Cyp18a1; Pvf1; Tao; dome; Cdc42; kis; smo; AP-2alpha; ex; MED15; CG4552; CG31661; cpb; aop…
GO:0002066	0.00165534	17.3319	0.254297	3	360	columnar/cuboidal epithelial cell development	0.00370346	8	Rbf; dor; arm; mip130; usp; ph-p; Raf; egh; Tsp3A; sgg; fs(1)Yb; N; Rala; brn; CG15571; Femcoat; Muc4B; spoon; sqh; Rpt4; pigs; Cdc7; Mcm6; dec-1; Cp7Fb; Cp7Fc; Cp36; Cp38; Dsor1; Ptpmeg2; spri; dsh; hop; dlg1; Evi5; Smr; CG15721; CG12716; hep; jub; Muc12Ea; Myb; kat80; sl; if; baz; par-6; e(y)1; upd1; phm; Cyp18a1; Pvf1; Tao; dome; Cdc42; kis; smo; AP-2alpha; ex; MED15; CG4552; CG31661; cpb; aop…
GO:0002065	0.001736	17.0372	0.258535	3	366	columnar/cuboidal epithelial cell differentiation	0.00370346	8	Rbf; dor; arm; mip130; usp; ph-p; Raf; egh; Tsp3A; sgg; fs(1)Yb; N; Rala; brn; CG15571; Femcoat; Muc4B; spoon; sqh; Rpt4; pigs; Cdc7; Mcm6; dec-1; Cp7Fb; Cp7Fc; Cp36; Cp38; Dsor1; Ptpmeg2; spri; dsh; hop; dlg1; Evi5; Smr; CG15721; CG12716; hep; jub; Muc12Ea; Myb; kat80; sl; if; baz; par-6; e(y)1; upd1; phm; Cyp18a1; Pvf1; Tao; dome; Cdc42; kis; smo; AP-2alpha; ex; MED15; CG4552; CG31661; cpb; aop…
GO:0007306	0.00191414	38.8295	0.0671062	2	95	eggshell chorion assembly	0.00382828	8	Rbf; mip130; N; CG15571; Femcoat; Muc4B; spoon; Cdc7; Mcm6; dec-1; Cp36; Cp38; hep; Myb; kat80; Cdc42; CG31661; dpp; okr; ed; smt3; grk; CG13113; aub; zuc; bun; CycE; cni; cact; chif; Pax; gus; geminin; Cul4; Jra; RanBPM; Dp; mip120; Khc; mip40; PCNA; Egfr; emc; Rac1; armi; lama; ndl; Rac2; Cp18; Cp15; Cp19; Cp16; mirr; Klc; Cad74A; mael; hd; puc; pic; Orc2; jvl; Caf1-55; spn-E; asun; Pxt; Ppcs; …
GO:0002064	0.00205295	16.0351	0.274076	3	388	epithelial cell development	0.00386438	8	Rbf; dor; arm; mip130; usp; ph-p; Raf; egh; Tsp3A; sgg; fs(1)Yb; N; Rala; brn; CG15571; Femcoat; Muc4B; spoon; sqh; Rpt4; pigs; Cdc7; Mcm6; xit; dec-1; cyr; Cp7Fb; Cp7Fc; Cp36; Cp38; Dsor1; Ptpmeg2; spri; dsh; hop; dlg1; Evi5; Smr; CG15721; CG12716; hep; jub; Muc12Ea; Myb; kat80; sl; if; baz; par-6; e(y)1; upd1; phm; Cyp18a1; Pvf1; Tao; dome; Cdc42; fog; kis; smo; AP-2alpha; ex; MED15; CG4552; CG…
GO:0030855	0.00292225	14.1009	0.310101	3	439	epithelial cell differentiation	0.00519511	8	pcl; Rbf; dor; arm; mip130; usp; ph-p; Raf; egh; Tsp3A; sgg; fs(1)Yb; N; Rala; brn; CG15571; Femcoat; Muc4B; peb; ovo; spoon; sqh; Rpt4; pigs; Cdc7; Mcm6; xit; dec-1; sn; cyr; Cp7Fb; Cp7Fc; Cp36; Cp38; Dsor1; Ptpmeg2; spri; dsh; hop; dlg1; Evi5; fw; LIMK1; Smr; CG15721; CG12716; hep; jub; Muc12Ea; Myb; kat80; sl; SMC3; if; baz; f; par-6; e(y)1; upd1; phm; Cyp18a1; Pvf1; Tao; dome; Cdc42; fog; kis…
GO:0022412	0.00344884	9.42651	0.706381	4	1000	cellular process involved in reproduction in multicellular organism	0.00580857	8	ac; Dredd; Rbf; dor; arm; mip130; usp; ph-p; Raf; egh; Tsp3A; PI4KIIIalpha; sgg; fs(1)Yb; N; dnc; Myc; Rala; brn; CG15571; Femcoat; Muc4B; ctp; ovo; snf; spoon; Act5C; raptor; sqh; wuho; Rpt4; swa; Pat1; pigs; Cdc7; Mcm6; Pink1; Inx2; dec-1; sn; Cp7Fb; Cp7Fc; Cp36; Cp38; otu; Moe; Dsor1; lz; Ptpmeg2; Yp2; Yp1; spri; sesB; feo; Dlic; dsh; hop; dlg1; Evi5; CkIIbeta; wisp; gd; Smr; CG15721; CG12716;…
GO:0003006	0.00392666	9.06977	0.731811	4	1036	developmental process involved in reproduction	0.00628265	8	ac; sc; Dredd; Rbf; dor; arm; mip130; usp; ph-p; Raf; egh; Tsp3A; PI4KIIIalpha; sgg; fs(1)Yb; N; dnc; Myc; Rala; fd3F; brn; Fas2; CG15571; Femcoat; Muc4B; ctp; ovo; snf; spoon; Act5C; raptor; sqh; wuho; Rpt4; swa; Pat1; pigs; Cdc7; Mcm6; Pink1; Inx2; dec-1; sn; Cp7Fb; Cp7Fc; Cp36; Cp38; otu; Moe; Dsor1; lz; Ptpmeg2; Yp2; Yp1; spri; sesB; feo; Dlic; sisA; dsh; hop; dlg1; Evi5; CkIIbeta; wisp; gd; …
GO:0007276	0.00443383	8.74602	0.756534	4	1071	gamete generation	0.00675631	8	ac; Dredd; Rbf; dor; arm; mip130; usp; ph-p; Raf; egh; Tsp3A; PI4KIIIalpha; sgg; fs(1)Yb; N; dnc; Myc; Rala; brn; CG15571; Femcoat; Muc4B; ctp; ovo; snf; spoon; Act5C; raptor; sqh; wuho; Rpt4; swa; Pat1; pigs; Cdc7; Mcm6; Inx2; dec-1; sn; Tbh; Cp7Fb; Cp7Fc; Cp36; Cp38; otu; Moe; Dsor1; lz; Ptpmeg2; Yp2; Yp1; spri; sesB; Imp; feo; Dlic; dsh; hop; dlg1; Evi5; CkIIbeta; wisp; gd; Smr; CG15721; CG127…
GO:0003002	0.00558571	11.0956	0.389922	3	552	regionalization	0.00797471	8	vnd; DAAM; arm; Raf; gt; boi; sgg; crm; N; bi; peb; ovo; spoon; sqh; swa; dx; Pat1; Nf-YC; Atx-1; brk; sn; fs(1)h; oc; Lim1; Moe; Dsor1; lz; btd; sev; dsh; hop; CkIIbeta; SelG; gd; tsg; hep; lic; mew; NetB; Grip128; sog; Chc; exd; disco; baz; f; B-H2; B-H1; Vps4; upd2; upd1; Wnt5; Bx; fu; Hs3st-B; dome; Mer; fd19B; cactin; run; Dd; S6kII; fog; l(2)gl; kis; smo; al; cbt; ush; lwr; ds; Su(dx); Rab5…
GO:0007351	0.00605974	21.2392	0.120791	2	171	tripartite regional subdivision	0.00797471	8	Raf; gt; N; peb; swa; Pat1; fs(1)h; oc; Moe; Dsor1; sev; tsg; lic; Grip128; sog; Chc; baz; Mer; fog; l(2)gl; ush; dpp; Syt1; bowl; slp1; capu; chic; cup; Hrb27C; wg; Rbsn-5; grk; Pka-C1; trk; Grip75; aub; Ge-1; Rab6; Sos; cni; dl; BicD; tup; vls; IKKepsilon; E2f2; gus; didum; tor; sax; gcl; tsu; eve; TER94; psq; cuff; SmD3; Nacalpha; drk; Dg; csul; Khc; cnk; POSH; stau; exu; shg; mago; tud; Egfr;…
GO:0008595	0.00605974	21.2392	0.120791	2	171	anterior/posterior axis specification, embryo	0.00797471	8	Raf; gt; N; peb; swa; Pat1; fs(1)h; oc; Moe; Dsor1; sev; tsg; lic; Grip128; sog; Chc; baz; Mer; fog; l(2)gl; ush; dpp; Syt1; bowl; slp1; capu; chic; cup; Hrb27C; wg; Rbsn-5; grk; Pka-C1; trk; Grip75; aub; Ge-1; Rab6; Sos; cni; dl; BicD; tup; vls; IKKepsilon; E2f2; gus; didum; tor; sax; gcl; tsu; eve; TER94; psq; cuff; SmD3; Nacalpha; drk; Dg; csul; Khc; cnk; POSH; stau; exu; shg; mago; tud; Egfr;…
GO:0000578	0.00640859	20.6207	0.124323	2	176	embryonic axis specification	0.00797471	8	Raf; gt; N; peb; swa; Pat1; fs(1)h; oc; Moe; Dsor1; sev; tsg; lic; Grip128; sog; Chc; baz; Mer; fog; l(2)gl; ush; lwr; dpp; Syt1; bowl; slp1; capu; chic; cup; Hrb27C; wg; Rbsn-5; grk; Pka-C1; trk; Grip75; aub; Ge-1; Rab6; Sos; cni; dl; BicD; tup; vls; IKKepsilon; E2f2; gus; didum; tor; sax; gcl; tsu; eve; TER94; psq; cuff; SmD3; Nacalpha; drk; Dg; csul; Khc; cnk; POSH; stau; exu; shg; mago; tud; …
GO:0009948	0.00647945	20.5012	0.125029	2	177	anterior/posterior axis specification	0.00797471	8	Raf; gt; N; peb; swa; Pat1; fs(1)h; oc; Moe; Dsor1; sev; tsg; lic; Grip128; sog; Chc; baz; Mer; fog; l(2)gl; ush; dpp; Syt1; bowl; slp1; capu; chic; cup; Hrb27C; wg; Rbsn-5; grk; Pka-C1; trk; Grip75; aub; Ge-1; Rab6; Sos; cni; dl; BicD; tup; vls; IKKepsilon; cad; E2f2; gus; didum; tor; sax; gcl; tsu; eve; TER94; psq; cuff; SmD3; Nacalpha; drk; Dg; csul; Khc; cnk; POSH; stau; exu; shg; mago; tud; …
GO:0048609	0.00696279	7.62481	0.85684	4	1213	multicellular organismal reproductive process	0.00802319	8	y; ac; Dredd; Rbf; dor; Adar; arm; mip130; usp; ph-p; Raf; tko; egh; Tsp3A; PI4KIIIalpha; sgg; per; fs(1)Yb; w; N; dnc; Myc; Rala; brn; CG15571; Femcoat; Muc4B; CHOp24; ctp; ovo; snf; spoon; SPR; frma; Act5C; raptor; sqh; wuho; Rpt4; swa; Pat1; pigs; Cdc7; Mcm6; Inx2; dec-1; sn; Tbh; Cp7Fb; Cp7Fc; Cp36; Cp38; otu; Nrg; Moe; Dsor1; lz; Ptpmeg2; Yp2; Yp1; spri; sesB; Imp; feo; CG15208; Dlic; CG1520…
GO:0007389	0.00702029	10.1812	0.423122	3	599	pattern specification process	0.00802319	8	vnd; DAAM; arm; Raf; gt; boi; sgg; crm; N; Myc; fd3F; ec; bi; peb; ovo; spoon; sqh; swa; dx; Pat1; Nf-YC; Atx-1; brk; CHES-1-like; sn; fs(1)h; oc; Lim1; Moe; Dsor1; lz; btd; sev; dsh; hop; CkIIbeta; SelG; gd; tsg; hep; lic; mew; NetB; Grip128; sog; Chc; exd; disco; baz; f; B-H2; B-H1; par-6; Vps4; upd2; upd1; Wnt5; Bx; fu; Hs3st-B; dome; Mer; fd19B; cactin; run; Dd; S6kII; fog; l(2)gl; kis; smo; …
GO:0019953	0.00744918	7.46753	0.873087	4	1236	sexual reproduction	0.00821979	8	y; ac; Dredd; Rbf; png; dor; Adar; arm; mip130; usp; ph-p; Raf; tko; egh; Klp3A; Tsp3A; PI4KIIIalpha; sgg; per; fs(1)Yb; fs(1)Ya; w; N; dnc; Myc; Rala; brn; CG15571; Femcoat; Muc4B; ctp; ovo; snf; spoon; SPR; frma; Act5C; raptor; sqh; wuho; Rpt4; swa; Pat1; pigs; Cdc7; Mcm6; Inx2; Hira; dec-1; sn; Tbh; Cp7Fb; Cp7Fc; Cp36; Cp38; otu; Nrg; Moe; Dsor1; lz; Ptpmeg2; Yp2; Yp1; spri; sesB; Imp; feo; CG…
GO:0044703	0.00782334	7.355	0.885095	4	1253	multi-organism reproductive process	0.0083449	8	y; ac; Dredd; Rbf; png; dor; Adar; arm; mip130; usp; ph-p; Raf; tko; egh; Klp3A; Tsp3A; PI4KIIIalpha; sgg; per; fs(1)Yb; fs(1)Ya; w; N; dnc; Myc; Rala; brn; CG15571; Femcoat; Muc4B; CHOp24; ctp; ovo; snf; spoon; SPR; frma; Act5C; raptor; sqh; wuho; Rpt4; swa; Pat1; pigs; Cdc7; Mcm6; Inx2; Hira; dec-1; sn; Tbh; Cp7Fb; Cp7Fc; Cp36; Cp38; otu; Nrg; Moe; Dsor1; lz; Ptpmeg2; Yp2; Yp1; spri; sesB; Imp;…
GO:0048646	0.00877242	9.35449	0.458441	3	649	anatomical structure formation involved in morphogenesis	0.0090554	8	CG13366; Dredd; tw; Rbf; DAAM; Scgdelta; arm; mip130; Actn; ph-p; egh; PI4KIIIalpha; rst; kirre; N; lva; brn; CG15571; Femcoat; Muc4B; ctp; spoon; Act5C; sqh; Cdc7; Mcm6; C3G; Inx2; nullo; brk; dec-1; Cp7Fb; Cp7Fc; Cp36; Cp38; Moe; Zpr1; lz; btd; feo; Kap3; dsh; hop; CG15721; CG12716; hep; mew; up; Pdcd4; Muc12Ea; NetB; dah; sog; sd; Chc; Myb; exd; kat80; mei-41; rngo; mthl1; sing; if; Nprl2; baz…
GO:0009952	0.00943721	16.7928	0.151872	2	215	anterior/posterior pattern specification	0.00943721	8	Raf; gt; N; bi; peb; sqh; swa; Pat1; fs(1)h; oc; Moe; Dsor1; sev; tsg; lic; Grip128; sog; Chc; baz; Wnt5; Mer; run; fog; l(2)gl; smo; ush; dpp; Syt1; lilli; Mad; odd; bowl; slp1; capu; tkv; chic; cup; Hrb27C; smt3; Wnt4; wg; Wnt6; Wnt10; Rbsn-5; grk; Pka-C1; trk; Grip75; aub; Ge-1; prd; Rab6; Sos; cni; dl; BicD; tup; vls; IKKepsilon; cad; E2f2; gus; EcR; didum; tor; sax; ptc; gcl; tsu; Wnt2; eve;…
GO:0042254	2.23969e-10	39.7418	0.273526	8	85	ribosome biogenesis	1.38861e-08	9	Gr98c; Ns3; sta; Nmd3; CG3071; CG2875; CG3527; RpL7A; RpS6; CG32413; CG1789; RpS28b; CG31950; CG2972; Rtc1; CG15916; CG8939; CG32344; mRpL10; dbe; RpS21; CG17493; nop5; emb; CG13097; CG4364; CG6724; CG6712; CG10341; Ns4; Tif-IA; Mys45A; CG1671; RpLP0-like; CG7637; CG7686; CG13185; CG8545; CG8414; wcd; Ns2; CG5033; CG10914; RpS18; CG4038; Fib; mRpL53; eIF6; Nop60B; CG8549; CG8038; RpS17; CG12301; …
GO:0022613	6.40648e-09	25.2021	0.415117	8	129	ribonucleoprotein complex biogenesis	1.30521e-07	9	Gr98c; Ns3; sta; Nmd3; CG3071; CG2875; CG3527; RpL7A; CG3198; RpS6; CG32413; CG1789; RpS28b; CG31950; CG2972; Rbp1-like; Rtc1; CG15916; CG8939; U2af50; eIF-2alpha; CG32344; pcm; mRpL10; dbe; RpS21; CG17493; mxt; nop5; x16; r2d2; CG7102; emb; CG13097; CG4364; Srp54; me31B; CG6724; aub; Ge-1; CG6712; CG10341; Ns4; Tif-IA; Mys45A; CG1671; RpLP0-like; CG7637; CG7686; CG13185; CG8545; AGO1; tra2; CG84…
GO:0006364	6.45791e-09	54.2571	0.148026	6	46	rRNA processing	1.30521e-07	9	sta; CG3071; CG3527; RpS6; CG1789; CG31950; CG2972; CG15916; CG8939; dbe; RpS21; nop5; CG13097; CG4364; CG6724; CG1671; CG7686; CG8545; CG8414; wcd; CG5033; CG4038; Fib; mRpL53; Nop60B; CG8549; CG8038; CG12301; mtTFB2; CG10909; CG9799; Mat89Ba; CG7009; CG5728; CG11837; RpS8; RpS7; CG1542; Fad2; Rpp30; l(3)08724; CG34198; CR40450; CG34278; CG34382; CG42579
GO:0016072	8.4207e-09	51.6653	0.154462	6	48	rRNA metabolic process	1.30521e-07	9	sta; CG3071; CG3527; RpS6; CG1789; CG31950; CG2972; CG15916; CG8939; dbe; RpS21; nop5; CG13097; CG4364; CG6724; brat; drosha; CG1671; CG7686; CG8545; CG8414; wcd; CG5033; CG4038; Fib; mRpL53; Nop60B; CG8549; CG8038; CG12301; mtTFB2; CG10909; CG9799; Mat89Ba; CG7009; CG5728; CG11837; RpS8; RpS7; CG1542; Fad2; Rpp30; l(3)08724; CG34198; CR40450; CG34278; CG34382; CG42579
GO:0044707	5.15302e-07	4.97666	11.501	27	3574	single-multicellular organism process	6.38974e-06	9	CR40441; lnr; ltr; caboose; mir-4979; mir-1009; mir-4985; CR43466; clt; Gr98b; Rheb; Gr98c; FASN2; Hex-t1; Desat1; CG32396; mRpS14; mthl11; Gr93d; Ranbp16; mir-2a-2; Mst77Y-2; CR44047; flash-flood; oak-gall; spikes; sprout; steeple; wavy-lumens; wobbly-lumens; CR43961; CR44611; CG44385; CG44405; CR44555; CR44737; ATP6; trnN; Su(Ste):CR42413; Su(Ste):CR42434; mei-175; CG30025; CG30047; CG30080; CG…
GO:0034470	1.73401e-06	19.6208	0.373283	6	116	ncRNA processing	1.79181e-05	9	CG32032; CG30344; CG33217; CG33268; sta; CG4045; CG3071; CG3527; l(1)G0045; IntS6; RpS6; IntS4; Drsl4; CG1789; CG31601; CG31627; CG31814; CG31950; CG2972; CG1434; CG15916; CG8939; IntS2; CG14231; CG15618; CG3645; dbe; IntS14; Tgt; RpS21; Gprk1; CG9596; nop5; CG13097; CG13090; CG4364; CG6724; Mt2; CG6388; loqs; Adat1; CG10495; CG9987; CG10189; CG10463; Nbr; drosha; CG8078; CG1671; JhI-1; CG7686; C…
GO:0032501	4.0996e-06	4.53098	15.4526	30	4802	multicellular organismal process	3.63107e-05	9	CR40441; lnr; ltr; caboose; mir-4979; mir-1009; mir-4985; CR43257; CR43466; clt; Gr98b; VepD; Rheb; Gr98c; Gr97a; Gr94a; CG32395; Gr59d; Gr58a; Gr47b; Gr39a; Gr39b; Gr28a; Gr22f; Cct1; FASN2; Hex-t1; Desat1; CG32396; mRpS14; Irbp; mthl11; Gr93d; Gr93c; Gr93b; Gr92a; Gr85a; Gr77a; Gr64f; Gr64c; Gr64b; Gr64a; Gr59b; Gr59a; Gr36c; Gr36b; Gr36a; Gr22b; Gr28b; Gr22e; Gr22c; Gr22a; Gr10a; RacGAP84C; Ra…
GO:0032502	5.1817e-06	4.27058	12.801	27	3978	developmental process	4.01582e-05	9	CR43257; clt; Gr98b; Rheb; Gr98c; FASN2; Hex-t1; CG32396; mRpS14; mthl11; Gr93d; Ranbp16; mir-2a-2; CG13639; Mst77Y-2; Mst77Y-7; Mst77Y-8; Su(E1)-A; Pif2; CR44047; CR44048; flash-flood; oak-gall; spikes; sprout; steeple; wavy-lumens; wobbly-lumens; CR43961; CR44611; CG44385; CG44405; CR44555; CR44737; CR45147; trnN; Su(Ste):CR42413; Su(Ste):CR42434; mei-175; CG30025; CG30047; CG30157; prom; CG301…
GO:0048518	1.37108e-05	4.98289	3.89695	14	1211	positive regulation of biological process	9.44523e-05	9	CR42874; Gr98c; Gpi1; CG32396; CR44555; CR44683; CG30177; CG30480; cs; fs(1)60; rets; CR40601; NA; CG31908; p38c; LpR1; Cyp12d1-d; CG33462; dpr1; AlkB; CG33259; CG13064; CG33269; G9a; ewg; ac; sc; l(1)sc; ase; vnd; Dredd; SkpA; RpL22; CDC45L; DAAM; Ns3; CG14812; Pgam5; trr; arm; usp; CG3630; pn; CG3071; Ilp6; Raf; PsGEF; boi; z; Pdfr; Tsp3A; Seipin; sgg; CG32795; N; Myc; ec; lva; tyf; norpA; rb; …
GO:0048639	1.53602e-05	18.6259	0.318578	5	99	positive regulation of developmental growth	9.52331e-05	9	CG32396; RpL22; Ns3; Ilp6; Myc; CG3527; raptor; CG32022; Rbm13; CG7246; Dsor1; dsh; dlg1; Drak; cac; lic; jub; CG8939; caz; CG32344; Atox1; Arp2; mnb; upd2; Wnt5; pico; kis; ebi; dbe; cpb; CG33506; Mad; tkv; d; PICK1; p38b; sNPF; step; sax; babo; Vang; stan; shot; Hr51; Ns2; Snx16; CG5033; stau; Sdc; mi; gbb; Adck; Pdk1; Rac1; Prpk; S6k; CG34026; Ank2; nmo; Arp3; Ilp2; simj; RIOK1; ssp; RhoGAP68F…
GO:0044767	1.72669e-05	3.89668	12.6659	26	3936	single-organism developmental process	9.73226e-05	9	CR43257; clt; Gr98b; Rheb; Gr98c; FASN2; Hex-t1; CG32396; mRpS14; mthl11; Gr93d; Ranbp16; mir-2a-2; CG13639; Mst77Y-2; Mst77Y-7; Mst77Y-8; Su(E1)-A; Pif2; CR44047; CR44048; flash-flood; oak-gall; spikes; sprout; steeple; wavy-lumens; wobbly-lumens; CR43961; CR44611; CG44385; CG44405; CR44555; CR44737; trnN; Su(Ste):CR42413; Su(Ste):CR42434; mei-175; CG30025; CG30047; CG30157; prom; CG30172; CG301…
GO:0044085	1.93581e-05	5.08268	3.46252	13	1076	cellular component biogenesis	9.8592e-05	9	clt; Gr98c; CR44237; disjointed; CR44555; CG30177; Opbp; scy; fdg; Fs(2)Etr; fs(2)ltoAHE1; fs(1)3; Fs(2)Vaj; fs(4)34; gp; moz; rar1; CR40601; att-ORFB; qvr; dpr1; CG33226; CG32500; CG9125; CG18420; rho-5; CG33269; ewg; CG13366; SkpA; tw; Rbf; CG3708; DAAM; Ns3; pck; sta; inc; dor; Scgdelta; arm; mip130; Ocrl; Actn; moody; Nmd3; CG3071; PsGEF; Klp3A; PI4KIIIalpha; sgg; kirre; N; CG2875; Vap-33A; F…
GO:0040018	2.06725e-05	29.1041	0.164116	4	51	positive regulation of multicellular organism growth	9.8592e-05	9	CG32396; RpL22; Ns3; Ilp6; Myc; CG3527; raptor; Rbm13; CG7246; Dsor1; Drak; lic; CG8939; CG32344; upd2; dbe; CG33506; p38b; sNPF; step; babo; Ns2; CG5033; mi; Adck; Pdk1; Prpk; S6k; CG34026; Ilp2; RIOK1; btl; trc; sNPF-R; Tsr1; Cdk12; RpL35A; Tctp; RpL24-like; Akt1; Ns1; tsl; Orct2; CG7006; RIOK2; Nf1; Pkc98E; ey; dc; Reph; Dsp1
GO:0034660	2.32204e-05	12.1987	0.585668	6	182	ncRNA metabolic process	0.000102833	9	CG32032; CG30344; CG33217; CG33268; sta; CG4045; CG3071; CG10802; CG3527; l(1)G0045; IntS6; Rpt4; RpS6; alpha-PheRS; IntS4; Trf4-1; Drsl4; CG1789; CG31601; CG31627; CG31814; CG31950; Aats-lys; CG2972; CG1434; CG8097; Aats-arg; CG15916; CG8939; mon2; AGBE; IntS2; Aats-his; CG14231; CG15618; CG3645; dbe; IntS14; Tgt; RpS21; CG17259; Gprk1; eIF-4B; Spf45; CG9596; nop5; Aats-ala; CG13097; CG13090; CG…
GO:0045927	3.44876e-05	15.6101	0.376501	5	117	positive regulation of growth	0.000142549	9	Gr98c; CG32396; RpL22; Ns3; Ilp6; Myc; CG3527; raptor; CG32022; Rbm13; CG7246; Dsor1; dsh; dlg1; Drak; cac; lic; jub; CycD; CG8939; caz; sl; CG32344; Atox1; Arp2; mnb; upd2; Wnt5; CG7423; pico; wap; kis; Pi3K21B; ebi; dbe; cpb; CG33506; Mad; tkv; d; bun; PICK1; p38b; sNPF; step; sax; babo; Vang; JhI-1; stan; shot; Hr51; Ns2; Snx16; CG5033; stau; Sdc; mi; gbb; yki; Adck; Pdk1; Rac1; Prpk; S6k; CG3…
GO:0048856	4.66653e-05	3.60486	11.5782	24	3598	anatomical structure development	0.000180828	9	CR43257; clt; Gr98b; Gr98c; FASN2; Hex-t1; CG32396; mRpS14; mthl11; Ranbp16; mir-2a-2; Mst77Y-2; Mst77Y-7; Mst77Y-8; Su(E1)-A; Pif2; CR44047; CR44048; flash-flood; oak-gall; spikes; sprout; steeple; wavy-lumens; wobbly-lumens; CR43961; CR44611; CG44385; CG44405; CR44555; CR45147; Su(Ste):CR42413; Su(Ste):CR42434; mei-175; CG30025; CG30047; CG30157; prom; CG30172; CG30177; CG30323; Opbp; CG30480; …
GO:0007549	5.23817e-05	50.0526	0.074013	3	23	dosage compensation	0.000191039	9	CG33269; sc; mof; msl-2; loqs; msl-1; mle; dpn; Dcr-2; snoRNA:660; CG33766; 5SrRNA:CR33373; ocm; scf; msl-3; Unr; AGO2; dop; Elp1; Su(var)3-7; DebC; SF2; Methyl-transferase-like
GO:0016070	6.71752e-05	4.08397	5.1069	15	1587	RNA metabolic process	0.000231381	9	CR42874; clt; mir-306; CR44047; CG4747; CG32032; CR44582; CR44767; CR44683; CG30344; CR40601; Mod(var)E646; Mod(var)E226; Mod(var)E1672; Mod(var)E1451; Mod(var)E1377; Mod(var)E1350; Mod(var)E1275; Mod(var)E1261; Mod(var)E1178; Mod(var)E113; Mod(var)E1060; Mod(var)E1047; Mod(var)600; Mod(var)26; Mod(var)242; Mod(var)234; Mod(var)224; Mod(var)177; Mod(var)1683; Mod(var)1658; Mod(var)1657; Mod(var)1…
GO:0040014	7.25746e-05	20.6945	0.225257	4	70	regulation of multicellular organism growth	0.000236822	9	CG32396; rets; p38c; RpL22; Ns3; Ilp6; Raf; gt; Myc; CG3527; raptor; Rbm13; CG7246; Dsor1; Erk7; Drak; lic; CG8939; CG32344; upd2; dbe; CG33506; p38b; sNPF; step; tor; babo; Ns2; CG5033; wbl; mi; Adck; Pdk1; Rabex-5; Prpk; S6k; CG34026; dally; Ilp2; RIOK1; btl; pip; trc; Ac76E; sNPF-R; Tsr1; Cdk12; RpL35A; Ras85D; Tctp; RpL24-like; foxo; Sdr; Akt1; Ns1; Pi3K92E; tsl; Rassf; Orct2; CG7006; RIOK2; …
GO:0035264	9.02333e-05	19.5058	0.238129	4	74	multicellular organism growth	0.000279723	9	Gr98c; CG32396; rets; p38c; RpL22; Ns3; Ilp6; Raf; gt; Myc; CG3527; raptor; Caf1-180; Rbm13; CG7246; Dsor1; Erk7; Drak; lic; CG8939; CG32344; upd2; dbe; CG33506; p38b; sNPF; step; tor; babo; Syx7; Ns2; CG5033; wbl; mi; Adck; Pdk1; Rabex-5; Prpk; S6k; CG34026; dally; Ilp2; RIOK1; btl; pip; trc; Ac76E; sNPF-R; Tsr1; Cdk12; RpL35A; Ras85D; Tctp; RpL24-like; foxo; Sdr; Akt1; Ns1; Pi3K92E; tsl; Rassf;…
GO:0007275	9.91523e-05	3.42176	10.4037	22	3233	multicellular organism development	0.000292735	9	clt; Gr98b; Rheb; Gr98c; FASN2; Hex-t1; CG32396; mRpS14; mthl11; Gr93d; Ranbp16; mir-2a-2; Mst77Y-2; CR44047; flash-flood; oak-gall; spikes; sprout; steeple; wavy-lumens; wobbly-lumens; CR43961; CR44611; CG44385; CG44405; CR44555; CR44737; trnN; Su(Ste):CR42413; Su(Ste):CR42434; mei-175; CG30025; CG30047; CG30157; prom; CG30172; CG30177; CG30323; CG30480; pel; l(2)k15801; ts; mor(1)9; l(3)AM1; N-…
GO:0006396	0.000107086	6.40723	1.51566	8	471	RNA processing	0.000301789	9	mir-306; CG4747; CG32032; CR44582; CG30344; CR40601; CG33217; CG33268; elav; su(w[a]); CG11418; sta; Adar; CG4061; CG4045; crn; CG3071; CG2685; Parg; CG6379; CG3527; CG17764; snf; Rnp4F; l(1)G0045; CG4119; IntS6; Spx; wuho; CG3198; CG1677; RpS6; Es2; IntS4; Drsl4; CG1789; CG7246; CG6999; Bx42; CG31601; CG31627; CG31814; Rrp40; CG31950; Sp1; CG2972; Imp; l(1)10Bb; wisp; Tango4; fne; REG; CG1622; C…
GO:0044699	0.000215108	4.13616	24.0253	35	7466	single-organism process	0.000579856	9	snoRNA:Or-CD9b; CG42661; CR40441; CG42870; lnr; ltr; caboose; mir-4979; mir-1009; mir-4985; CR43257; CR43466; clt; Gr98b; Rheb; Gr98c; FASN2; Hex-t1; HBS1; Gpi1; prt; Desat1; CG32396; Tsp68C; mRpS14; TotZ; mthl11; Gr93d; Gr59b; Gr22e; Ranbp16; Tre1; mir-2a-2; CG13639; CR43418; Mst77Y-2; Mst77Y-3Psi; Mst77Y-4; Mst77Y-6Psi; Mst77Y-7; Mst77Y-8; Su(E1)-A; Pif2; CR44047; CR44048; CG43710; disjointed; …
GO:0042273	0.000279452	108.496	0.0257437	2	8	ribosomal large subunit biogenesis	0.000721919	9	CG32344; CG17493; CG4364; CG6724; Mys45A; CG13185; CG8549; Ns1
GO:0090304	0.000292388	3.51633	5.80841	15	1805	nucleic acid metabolic process	0.000725121	9	CR42874; clt; TotZ; mir-306; Mst77Y-7; Mst77Y-8; Su(E1)-A; CR44047; CG4747; CG32032; CR44582; CR44767; CR44683; ATP6; CG30087; CG30197; CG30344; mei-S8; mus208; Pzl; PRY; WDY; CCY; CR40601; Mod(var)E646; Mod(var)E226; Mod(var)E1672; Mod(var)E1451; Mod(var)E1377; Mod(var)E1350; Mod(var)E1275; Mod(var)E1261; Mod(var)E1178; Mod(var)E113; Mod(var)E1060; Mod(var)E1047; Mod(var)600; Mod(var)26; Mod(var…
GO:0048731	0.000343167	3.21704	8.05455	18	2503	system development	0.000818321	9	clt; Gr98b; Gr98c; FASN2; CG32396; mRpS14; mthl11; Ranbp16; mir-2a-2; Mst77Y-2; CR44047; flash-flood; oak-gall; spikes; sprout; steeple; wavy-lumens; wobbly-lumens; CR43961; CR44611; CG44385; CG44405; CR44555; mei-175; CG30025; CG30157; CG30172; CG30177; CG30323; CG30480; pel; l(2)k15801; ts; mor(1)9; l(3)AM1; N-b; ire; rdgD; rug; pom; l(1)TK101; ifm(2)RU7; ifm(2)RU6; l(1)TW9; Bm; aperA; ccd; fs(…
GO:0051240	0.000364461	9.2435	0.621066	5	193	positive regulation of multicellular organismal process	0.000826421	9	CG32396; fs(1)60; LpR1; Cyp12d1-d; G9a; RpL22; Ns3; arm; Ilp6; Raf; Myc; ec; lva; CG3527; ctp; raptor; Top3beta; CG32017; CG32022; oc; Rbm13; CG7246; fh; Dsor1; lz; BTBD9; Imp; sev; dsh; dlg1; Drak; cac; lic; jub; ben; CG8939; caz; CG32344; Atox1; Arp2; mbt; mnb; ari-1; upd2; Wnt5; fd19B; kis; ebi; Ptth; dbe; cpb; aop; Sec24CD; dpp; CG33506; Mad; vtd; slp1; slp2; morgue; tkv; vri; chic; homer; wg…
GO:0051094	0.000373222	9.19386	0.624284	5	194	positive regulation of developmental process	0.000826421	9	CG32396; G9a; RpL22; DAAM; Ns3; Pgam5; arm; Ilp6; Raf; Myc; ec; lva; CG3527; ctp; raptor; Top3beta; Marf; Pink1; CG32017; CG32022; oc; Rbm13; CG7246; fh; Dsor1; lz; Imp; sev; dsh; dlg1; Drak; cac; lic; Pdcd4; jub; ben; CG8939; caz; CG32344; Atox1; Arp2; mbt; mnb; ari-1; upd2; Wnt5; pico; fd19B; kis; ebi; Ptth; dbe; cpb; aop; Sec24CD; dpp; Drp1; CG33506; Mad; vtd; slp1; slp2; morgue; tkv; chic; wg…
GO:0022008	0.00042861	3.62761	4.67891	13	1454	neurogenesis	0.00091634	9	Gr98c; CR44047; CR44555; CG30157; CG30172; CG30323; CG30480; Bm; Fs(2)Etr; CG32236; Rst(2)chl; l(1)18; Proc; l(2)k16616; rets; Rpb7; att-ORFB; p38c; CG33470; CG33453; dpr1; CG33235; rho-5; CG33259; CG32318; G9a; ac; sc; l(1)sc; pcl; ase; CG18273; Appl; vnd; Dredd; Roc1a; SkpA; sdk; MED22; CG3703; CDC45L; CG11398; DAAM; CG11417; CG11448; pck; rush; arm; usp; moody; CG4061; CG16903; Unc-76; ph-p; N…
GO:0007399	0.000534759	3.40357	5.448	14	1693	nervous system development	0.00110517	9	Gr98c; mir-2a-2; CR44047; CR44555; mei-175; CG30157; CG30172; CG30177; CG30323; CG30480; pel; l(2)k15801; ts; l(3)AM1; Bm; ccd; Fs(2)Etr; CG32236; Rst(2)chl; l(1)18; umpA; l(3)SG63; mbmC; mbs; Proc; bwa; Su(osk)C37; gau; l(2)k16616; rets; sct; Rpb7; att-ORFB; p38c; CG33470; CG33453; dpr1; CG33235; rho-5; CG33259; CG32318; G9a; CG13377; ewg; ac; sc; l(1)sc; pcl; ase; CG18273; elav; Appl; vnd; Dred…
GO:0048638	0.000704315	7.95234	0.717605	5	223	regulation of developmental growth	0.00140863	9	CG32396; CG30177; Fs(2)Etr; rets; p38c; ewg; SkpA; RpL22; Ns3; Hr4; usp; Ilp6; Raf; gt; PI4KIIIalpha; sgg; Myc; Fas2; CG3527; raptor; CG32022; Rbm13; CG7246; Dsor1; Erk7; dsh; dlg1; Drak; bif; cac; lic; jub; hiw; CG8939; caz; CG32344; Atox1; Arp2; baz; beta-Spec; mnb; upd2; Wnt5; Tao; Mer; Cdc42; pico; kis; Pi3K21B; ebi; ex; dbe; cpb; dpp; CG33506; Mad; ed; ft; tkv; d; Nos; PICK1; spict; kuz; p38…
GO:0050789	0.000841256	2.84457	11.0859	21	3445	regulation of biological process	0.00162993	9	snoRNA:Or-CD9b; CR40441; CR42874; clt; Gr98c; Gpi1; CG32396; mthl11; Gr93d; Gr22e; Ranbp16; mir-2a-2; CR43418; Mst77Y-3Psi; Mst77Y-4; Mst77Y-6Psi; Pif2; CR44047; CR44048; CG43710; CR44197; CG31381; CR45594; CR44767; CR44401; CR44555; CR44773; CR44683; ATP6; trnN; sprt; CG30056; CG30087; CG30177; CG30284; Cht12; CG30323; CG30343; CG30357; CG30383; CG30424; CG30480; CG30497; ch; cs; Fs(2)Etr; l(3)c…
GO:0009987	0.000931263	3.60163	25.38	35	7887	cellular process	0.00174081	9	snoRNA:Or-CD9b; CG42661; CG42870; CR42874; CR43257; clt; Gr98c; FASN2; Hex-t1; HBS1; Gpi1; prt; Desat1; CG32396; Tsp68C; mRpS14; Irbp; TotZ; TotX; TotF; TotC; Ste12DOR; mthl11; Gr93d; Gr22e; Ranbp16; mir-2a-2; CG43133; mir-306; CG13639; CR43418; Mst77Y-1; Mst77Y-3Psi; Mst77Y-4; Mst77Y-6Psi; Mst77Y-7; Mst77Y-8; Su(E1)-A; Pif2; CR44237; CR44047; CR44048; CG43710; CR44197; disjointed; CG4747; CG3138…
GO:0030154	0.000968223	2.95	7.96766	17	2476	cell differentiation	0.00174081	9	CR43257; Gr98c; FASN2; mRpS14; mthl11; CG13639; Mst77Y-7; Mst77Y-8; Su(E1)-A; Pif2; CR44047; CR44048; CR44555; Su(Ste):CR42413; Su(Ste):CR42434; CG30157; CG30172; CG30323; CG30480; l(2)61E5; l(2)50F7; l(2)46F4; l(2)2D8; l(2)12A9; l(1)G0119; vst; scy; Bm; Ble; ch-b; clv-1; dil; fdg; fs(1)A180; fs(1)A214; fs(2)eo1; fs(2)eo7; fs(2)eo5; Liprin-alpha; Fs(2)Etr; CG32236; Rst(2)chl; l(1)18; mat(2)syn-D;…
GO:0065007	0.000982717	2.78665	12.0673	22	3750	biological regulation	0.00174081	9	snoRNA:Or-CD9b; CR40441; CR42874; clt; Gr98c; HBS1; Gpi1; CG32396; TotZ; mthl11; Gr93d; Gr22e; Ranbp16; mir-2a-2; mir-4947; CR43418; Mst77Y-3Psi; Mst77Y-4; Mst77Y-6Psi; Pif2; CR44047; CR44048; CG43710; CR44197; CG31381; CR45594; CR44767; CR44401; CR44555; CR44737; CR44773; CR44683; ATP6; trnN; sprt; CG30056; CG30087; CG30177; CG30284; Cht12; CG30323; CG30343; CG30357; CG30383; CG30424; CG30480; C…
GO:0009047	0.00103309	50.0473	0.0482694	2	15	dosage compensation by hyperactivation of X chromosome	0.00177322	9	mof; msl-2; loqs; msl-1; mle; Dcr-2; CG33766; 5SrRNA:CR33373; scf; msl-3; Unr; AGO2; dop; Elp1; Su(var)3-7
GO:0071840	0.00105821	2.83433	9.6056	19	2985	cellular component organization or biogenesis	0.00177322	9	clt; Gr98c; Gpi1; CG32396; TotZ; CG43133; Mst77Y-7; Mst77Y-8; Su(E1)-A; CR44237; disjointed; CR44555; ATP6; l(1)1Bb; l(4)7-M484; l(4)7-M1365; CG33939; CG33946; CG30037; CG30080; NT5E-2; CG30172; CG30177; CG30323; Opbp; mot-32l; l(3)91Ce; scy; Bm; ch; fdg; Fs(2)Etr; mei-S8; mei-S282; m(Est-6); mit(1)3; mit(1)4; mit(1)5; mit(1)6; mit(1)7; mit(1)8; mit(1)9; mit(1)10; mit(1)11; mit(1)12; mit(1)13; mi…
GO:0048522	0.00148157	3.60906	3.38529	10	1052	positive regulation of cellular process	0.0024173	9	CR42874; Gr98c; CR44683; CG30177; CG30480; rets; CR40601; NA; p38c; Cyp12d1-d; CG33462; dpr1; AlkB; CG33259; CG13064; CG33269; G9a; ewg; ac; sc; l(1)sc; ase; vnd; Dredd; SkpA; CDC45L; DAAM; CG14812; Pgam5; trr; arm; usp; CG3630; pn; CG3071; Raf; PsGEF; boi; z; Pdfr; Tsp3A; sgg; N; Myc; ec; lva; tyf; norpA; CHOp24; ctp; Bteb2; ovo; Vsx1; mof; MCTS1; raptor; Top3beta; Rpt4; Marf; dx; APC7; Cdc7; CG…
GO:0048869	0.00155715	2.80292	8.29911	17	2579	cellular developmental process	0.00247547	9	CR43257; Gr98c; FASN2; mRpS14; mthl11; CG13639; Mst77Y-7; Mst77Y-8; Su(E1)-A; Pif2; CR44047; CR44048; CR44555; Su(Ste):CR42413; Su(Ste):CR42434; CG30157; CG30172; CG30177; CG30323; Opbp; CG30480; l(2)61E5; l(2)50F7; l(2)46F4; l(2)2D8; l(2)12A9; l(1)G0119; vst; scy; Bm; Ble; ch-b; clv-1; dil; fdg; fs(1)A180; fs(1)A214; fs(2)eo1; fs(2)eo7; fs(2)eo5; Liprin-alpha; Fs(2)Etr; CG32236; Rst(2)chl; l(1)1…
GO:0006139	0.00163844	2.90711	6.81563	15	2118	nucleobase-containing compound metabolic process	0.00253958	9	CR42874; clt; HBS1; TotZ; mir-306; Mst77Y-7; Mst77Y-8; Su(E1)-A; CR44047; CG4747; CG32032; CR44582; CR44767; CR44683; COX2; ATP6; trnG; trnR; trnN; ND6; trnS1; ND1; srRNA; mthl13; CG30087; CG30105; CG30197; CG30291; CG30344; CG30355; CG30411; mei-S8; mus208; Pzl; PRY; WDY; CCY; CR40601; Mod(var)E646; Mod(var)E226; Mod(var)E1672; Mod(var)E1451; Mod(var)E1377; Mod(var)E1350; Mod(var)E1275; Mod(var)…
GO:0010467	0.00176544	2.81725	7.61691	16	2367	gene expression	0.00266968	9	snoRNA:Or-CD9b; CR42874; clt; Gr98c; Gpi1; Irbp; mir-2a-2; mir-306; CR44047; CG4747; CG32032; CR45594; CR44582; CR44767; CG45154; CR44683; CR44580; COX1; trnL1; trnK; trnD; ATP8; COX3; ND3; trnA; trnE; ND5; trnH; ND4; ND4L; trnT; trnP; CYTB; trnL2; lrRNA; trnI; Su(Ste):CR42405; Su(Ste):CR42423; Su(Ste):CR42435; NT5E-2; CG30344; l(1)L25.7; Pa; CR40601; Mod(var)E646; Mod(var)E226; Mod(var)E1672; Mo…
GO:0040008	0.00247126	5.92258	0.952516	5	296	regulation of growth	0.00364806	9	Gr98c; CG32396; CG30177; Fs(2)Etr; rets; p38c; ewg; SkpA; RpL22; Ns3; Hr4; usp; Ilp6; Raf; gt; PI4KIIIalpha; sgg; N; Myc; Mnt; Fas2; CG3527; raptor; brk; CG32022; Hexo2; Rbm13; CG7246; Dsor1; Erk7; dsh; dlg1; Drak; bif; cac; lic; jub; hiw; Chc; CycD; CG8939; vap; caz; sl; CG32344; Atox1; Arp2; baz; beta-Spec; mnb; Vps4; upd2; Wnt5; CG7423; Tao; Mer; Cdc42; pico; wap; l(2)gl; kis; Pi3K21B; ebi; ex…
GO:0046483	0.0025343	2.76108	7.11169	15	2210	heterocycle metabolic process	0.0036541	9	CR42874; clt; HBS1; TotZ; mir-306; Mst77Y-7; Mst77Y-8; Su(E1)-A; CR44047; CG4747; CG32032; CR44582; CR44767; CR44683; COX2; ATP6; trnG; trnR; trnN; ND6; trnS1; ND1; srRNA; mthl13; CG30087; CG30105; CG30197; CG30291; CG30344; CG30355; CG30411; mei-S8; mus208; pod; Pzl; PRY; WDY; CCY; CR40601; Mod(var)E646; Mod(var)E226; Mod(var)E1672; Mod(var)E1451; Mod(var)E1377; Mod(var)E1350; Mod(var)E1275; Mod…
GO:0040007	0.00292308	4.74312	1.44486	6	449	growth	0.00411889	9	Gr98c; CG32396; CG30177; Fs(2)Etr; l(1)G0324; Proc; rets; p38c; dpr1; ewg; SkpA; RpL22; DAAM; Ns3; arm; Hr4; usp; Ilp6; Raf; gt; PI4KIIIalpha; sgg; N; dnc; Myc; Mnt; Fas2; bi; CG3527; raptor; sqh; brk; Dok; CG32022; Nrg; Caf1-180; Hexo2; Rbm13; CG7246; Dsor1; Erk7; spri; sesB; Imp; dsh; dlg1; Drak; bif; cac; Ten-a; LIMK1; hep; lic; jub; ben; rut; eag; hiw; Efhc1.1; Chc; CycD; CG8939; vap; caz; sl…
GO:0006725	0.00301004	2.70428	7.23397	15	2248	cellular aromatic compound metabolic process	0.00414717	9	CR42874; clt; HBS1; TotZ; Gr22e; mir-306; Mst77Y-7; Mst77Y-8; Su(E1)-A; CR44047; CG4747; CG32032; CR44582; CR44767; CR44683; COX2; ATP6; trnG; trnR; trnN; ND6; trnS1; ND1; srRNA; mthl13; CG30087; CG30105; CG30197; CG30291; CG30344; CG30355; CG30411; mei-S8; mus208; pod; Pzl; PRY; WDY; CCY; CR40601; Mod(var)E646; Mod(var)E226; Mod(var)E1672; Mod(var)E1451; Mod(var)E1377; Mod(var)E1350; Mod(var)E12…
GO:0044763	0.00351867	2.51564	18.9409	28	5886	single-organism cellular process	0.00474256	9	CG42661; CG42870; CR43257; Gr98c; FASN2; Hex-t1; HBS1; Gpi1; prt; Desat1; CG32396; Tsp68C; mRpS14; TotZ; mthl11; Gr93d; Gr22e; Ranbp16; CG13639; CR43418; Mst77Y-3Psi; Mst77Y-4; Mst77Y-6Psi; Mst77Y-7; Mst77Y-8; Su(E1)-A; Pif2; CR44047; CR44048; CG43710; disjointed; CR44555; CR44737; CR45637; COX2; ATP6; trnG; trnR; trnN; trnS2; ND6; trnS1; ND1; srRNA; Su(Ste):CR42413; Su(Ste):CR42434; l(1)1Bb; l(4…
GO:0030048	0.00362202	24.998	0.0901028	2	28	actin filament-based movement	0.00477798	9	Mlc-c; sqh; xit; hop; mthl1; upd1; fog; CG12061; conu; Traf4; ck; dia; didum; Cam; Rho1; RhoGEF2; dyl; zye; jar; WASp; neo; mey; nyo; Rok; mit; DNApol-alpha60; l(3)88Bb; lectin-33A
GO:1901360	0.00415423	2.59903	7.4721	15	2322	organic cyclic compound metabolic process	0.00536588	9	CR42874; clt; HBS1; TotZ; Gr22e; mir-306; Mst77Y-7; Mst77Y-8; Su(E1)-A; CR44047; CG4747; CG32032; CR44582; CR44767; CR44737; CR44683; COX2; ATP6; trnG; trnR; trnN; ND6; trnS1; ND1; srRNA; mthl13; CG30087; CG30105; CG30197; CG30291; CG30344; CG30355; CG30411; mei-S8; mus208; pod; Pzl; PRY; WDY; CCY; CR40601; Mod(var)E646; Mod(var)E226; Mod(var)E1672; Mod(var)E1451; Mod(var)E1377; Mod(var)E1350; Mo…
GO:0044260	0.00535372	2.35957	11.8163	20	3672	cellular macromolecule metabolic process	0.00655612	9	snoRNA:Or-CD9b; CR42874; clt; Gr98c; Gpi1; prt; Irbp; TotZ; mir-306; Mst77Y-1; Mst77Y-7; Mst77Y-8; Su(E1)-A; CR44047; CR44197; CG4747; CG31381; CG32032; CR45594; CR44582; CR44767; CG45154; CR44555; CR45637; CR44683; CR44580; COX1; trnL1; trnK; trnD; ATP8; ATP6; COX3; ND3; trnA; trnE; ND5; trnH; ND4; ND4L; trnT; trnP; CYTB; trnL2; lrRNA; trnI; Su(Ste):CR42405; Su(Ste):CR42423; Su(Ste):CR42435; CG3…
GO:0040029	0.00539756	6.21896	0.711169	4	221	regulation of gene expression, epigenetic	0.00655612	9	Mod(var)E646; Mod(var)E226; Mod(var)E1672; Mod(var)E1451; Mod(var)E1377; Mod(var)E1350; Mod(var)E1275; Mod(var)E1261; Mod(var)E1178; Mod(var)E113; Mod(var)E1060; Mod(var)E1047; Mod(var)600; Mod(var)26; Mod(var)242; Mod(var)234; Mod(var)224; Mod(var)177; Mod(var)1683; Mod(var)1658; Mod(var)1657; Mod(var)1650; Mod(var)1641; Mod(var)1602; Mod(var)1557; Mod(var)1551; Mod(var)1540; Mod(var)1539; Mod(v…
GO:0048589	0.00543149	4.88644	1.14559	5	356	developmental growth	0.00655612	9	Gr98c; CG32396; CG30177; Fs(2)Etr; l(1)G0324; rets; p38c; dpr1; ewg; SkpA; RpL22; DAAM; Ns3; arm; Hr4; usp; Ilp6; Raf; gt; PI4KIIIalpha; sgg; N; dnc; Myc; Fas2; bi; CG3527; raptor; sqh; Dok; CG32022; Nrg; Caf1-180; Rbm13; CG7246; Dsor1; Erk7; spri; sesB; Imp; dsh; dlg1; Drak; bif; cac; Ten-a; LIMK1; hep; lic; jub; ben; rut; eag; hiw; Efhc1.1; CG8939; caz; CG32344; Atox1; Arp2; baz; mnb; Sh; upd2;…
GO:0051276	0.00549868	3.67927	2.18821	7	680	chromosome organization	0.00655612	9	clt; TotZ; CG43133; Mst77Y-7; Mst77Y-8; Su(E1)-A; disjointed; l(2)GPMG-14; Pzl; PRY; WDY; CCY; CR40005; CR40601; Mod(var)E646; Mod(var)E226; Mod(var)E1672; Mod(var)E1451; Mod(var)E1377; Mod(var)E1350; Mod(var)E1275; Mod(var)E1261; Mod(var)E1178; Mod(var)E113; Mod(var)E1060; Mod(var)E1047; Mod(var)600; Mod(var)26; Mod(var)242; Mod(var)234; Mod(var)224; Mod(var)177; Mod(var)1683; Mod(var)1658; Mod(…
GO:0070374	0.0059394	19.1041	0.115846	2	36	positive regulation of ERK1 and ERK2 cascade	0.00694798	9	CG30480; Raf; CG3198; Dsor1; vtd; lt; Fnta; betaggt-I; Fgop2; Caper; Cka; CG6686; sNPF; Mob4; CG1603; 14-3-3zeta; CG8878; cnk; Prp19; mago; Cdc37; Strip; CG10754; sNPF-R; Cdk12; Fip1; ksr; gfzf; eIF4AIII; M1BP; Sur-8; 14-3-3epsilon; Hmgcr; CG4849; l(2)51Da; ACXE
GO:0044708	0.0062117	4.03155	1.68621	6	524	single-organism behavior	0.00713195	9	CR40441; lnr; ltr; caboose; mir-4979; mir-1009; mir-4985; CR43466; Desat1; Gr59b; Gr22e; CG30080; CG30447; Ae; apx; ccd; cripB; cs; fliB; fliE; flrd397; flrdA; flrdB; flrdC; flrdD; flrdE; flrdF; flrdG; flrdH; flrdJ; flrdL; flrdM; Su(var)303; mer-on-3; Hv; hypoC; hypoE; acd(2)5N18; acd(2)5N17; acd(2)5N15; acd(2)5M7; acd(2)5M38; acd(2)5G23; acd(2)5F3; acd(2)5E8; acd(2)5D10; CG32276; ov; rdm; l(3)04…
GO:0007623	0.00669339	8.49055	0.386155	3	120	circadian rhythm	0.00754528	9	CR40441; CG30447; LpR1; Cyp12d1-d; CG33259; CG5273; inc; Adar; Pdfr; sgg; per; CG2650; dnc; tyf; norpA; Hk; nocte; BTBD9; Ork1; hop; dlg1; CkIIbeta; disco; mnb; Sh; upd1; CrebB; Bx; dome; tilB; S6kII; tim; jet; vri; lid; homer; Dh31; Acer; Pka-C1; Rh5; B4; p38b; Cul3; Ddc; sNPF; Ac3; sxc; EcR; so; Mef2; Pka-R2; Iswi; Ih; Hr51; Rho1; DAT; prod; 5-HT1B; 5-HT1A; Fmr1; robo1; gdl-ORF39; CG33668; Dat;…
GO:0048511	0.00700549	8.34653	0.392591	3	122	rhythmic process	0.00775607	9	CR40441; CG30447; LpR1; Cyp12d1-d; CG33259; CG5273; inc; Adar; Pdfr; sgg; per; CG2650; dnc; tyf; norpA; Hk; nocte; BTBD9; Ork1; hop; dlg1; CkIIbeta; disco; mnb; Sh; upd1; CrebB; Bx; dome; tilB; S6kII; tim; jet; vri; lid; homer; Dh31; Acer; numb; Pka-C1; Rh5; B4; p38b; Cul3; Ddc; sNPF; Ac3; sxc; EcR; so; Mef2; Pka-R2; Iswi; Ih; Hr51; Rho1; DAT; prod; 5-HT1B; 5-HT1A; Fmr1; robo1; stl; gdl-ORF39; CG…
GO:0070371	0.00729412	17.0877	0.128718	2	40	ERK1 and ERK2 cascade	0.00779716	9	CG30480; Raf; CG3198; Dsor1; vtd; lt; Fnta; betaggt-I; Fgop2; Caper; Cka; CG6686; sNPF; Mob4; CG1603; 14-3-3zeta; CG8878; cnk; Prp19; mago; PTP-ER; Cdc37; Strip; CG10754; sNPF-R; Cdk12; Fip1; ksr; gfzf; eIF4AIII; M1BP; Sur-8; 14-3-3epsilon; ATPsynD; CG4936; Hmgcr; CG4849; alph; l(2)51Da; ACXE
GO:0070372	0.00729412	17.0877	0.128718	2	40	regulation of ERK1 and ERK2 cascade	0.00779716	9	CG30480; Raf; CG3198; Dsor1; vtd; lt; Fnta; betaggt-I; Fgop2; Caper; Cka; CG6686; sNPF; Mob4; CG1603; 14-3-3zeta; CG8878; cnk; Prp19; mago; PTP-ER; Cdc37; Strip; CG10754; sNPF-R; Cdk12; Fip1; ksr; gfzf; eIF4AIII; M1BP; Sur-8; 14-3-3epsilon; ATPsynD; CG4936; Hmgcr; CG4849; alph; l(2)51Da; ACXE
GO:0010604	0.00802354	3.80872	1.77953	6	553	positive regulation of macromolecule metabolic process	0.00843152	9	CR42874; Gr98c; CR44683; CG30480; CR40601; p38c; CG33269; G9a; ac; sc; l(1)sc; ase; vnd; trr; arm; usp; pn; CG3071; Raf; z; sgg; N; Myc; tyf; rb; Bteb2; ovo; mof; MCTS1; raptor; Rpt4; APC7; Cdc7; CG3198; NELF-B; fs(1)h; CG10555; Trf2; org-1; CG32017; otu; oc; Lim1; HP1b; Bap111; CG31010; Dsor1; lz; btd; CDK2AP1; sisA; Met; Upf1; CkIalpha; Tis11; Brms1; hep; lic; Bap60; sno; ben; Rab3-GEF; gce; sd…
GO:0016568	0.00899885	5.3402	0.823797	4	256	chromatin modification	0.00929881	9	clt; Mst77Y-7; Mst77Y-8; Su(E1)-A; Pzl; PRY; WDY; CCY; CG33269; G9a; Hmt4-20; CG11412; trr; z; CG12498; Parg; Tip60; CG2982; Sirt4; mof; Act5C; Btnd; Cdc7; Hira; tut; HP1b; Bap111; CG31286; Cfp1; CG31704; CG31710; CG31735; CG31870; CG31874; Pa1; Chrac-16; Usp7; Bap60; HDAC4; Set2; Top1; HDAC6; Arp6; rumi; CG31272; Nup153; e(y)1; Spt7; Arp8; Ada3; Ing3; CoRest; e(y)3; Hers; ebi; CG12674; Atxn7; El…
GO:0031935	0.00956176	14.7506	0.148026	2	46	regulation of chromatin silencing	0.00956176	9	CG33269; z; CoRest; e(y)3; Elba2; Bsg25A; Elba3; Su(var)205; piwi; Samuel; crol; msl-1; BubR1; Bap170; psq; wde; cid; CG9754; CG33766; 5SrRNA:CR33373; egg; mu2; blanks; Usp47; scny; msl-3; JIL-1; Prp3; Su(var)3-3; FRG1; CG8036; Ibf2; Ibf1; HP1e; JHDM2; Sirt6; l(3)neo38; Su(var)3-7; su(Hw); Cp190; HP1c; polybromo; vig2; Pur-alpha; jim; e(y)5
GO:0045454	0.00956176	14.7506	0.148026	2	46	cell redox homeostasis	0.00956176	9	CG4199; CG12206; TrxT; dhd; Trxr-1; CG31414; prtp; SelG; CG18130; CG14407; CG9911; CG14221; CG18132; AIF; Prx6005; Set1; Trx-2; CG6523; CG9302; CaBP1; CG10700; ERp60; CG4670; CG11007; CG8517; Grx-1; 5SrRNA:CR33438; CG5554; CG8993; Txl; CG13473; Pdi; CG5027; Su(P); CG7484; CG7430; CG6852; Trxr-2; CG31559; CG10029; Prx3; CG6690; CG17843; qkr58E-7; NAT1; Dlip3
GO:0016043	7.85148e-06	7.23601	5.04372	15	2921	cellular component organization	0.00025557	10	G9a; ewg; pcl; ase; CG17778; Appl; CG13366; Hmt4-20; SkpA; RpL22; tw; Rbf; Sec22; MED22; CG3708; TRAM; mus81; CG3703; CDC45L; CG11398; DAAM; CG11412; CG11448; Lrpprc2; pck; mei-38; rush; sta; inc; dor; CG14798; Scgdelta; Pex5; Pgam5; Vps26; trr; arm; mip130; Ocrl; usp; Actn; moody; CG4061; ph-p; wapl; pn; Vinc; pcx; crn; PsGEF; gt; z; egh; Klp3A; eIF3ga; PI4KIIIalpha; sgg; fs(1)Yb; fs(1)Ya; ttm50…
GO:0071840	1.04314e-05	7.03391	5.15423	15	2985	cellular component organization or biogenesis	0.00025557	10	G9a; ewg; pcl; ase; CG17778; Appl; CG13366; Hmt4-20; SkpA; RpL22; tw; Rbf; Sec22; MED22; CG3708; TRAM; mus81; CG3703; CDC45L; CG11398; DAAM; CG11412; CG11448; Lrpprc2; Ns3; pck; mei-38; rush; sta; inc; dor; CG14798; Scgdelta; Pex5; Pgam5; Vps26; trr; arm; mip130; Ocrl; usp; Actn; moody; CG4061; ph-p; wapl; pn; Nmd3; Vinc; pcx; crn; CG3071; PsGEF; gt; z; egh; Klp3A; eIF3ga; PI4KIIIalpha; sgg; fs(1…
GO:0016573	0.000236688	29.3754	0.122596	3	71	histone acetylation	0.00187283	10	CG11412; Parg; Tip60; mof; HDAC4; e(y)1; Spt7; Ada3; Ing3; CoRest; Taf10b; Elp3; lid; Gas41; Atac1; CG12560; D12; YL-1; Sirt1; CG9293; NC2beta; Atac2; msl-1; Nipped-A; MrgBP; E(Pc); Bap55; CG10931; DMAP1; Sgf29; enok; Atac3; HDAC1; Eaf6; eco; Naa60; Gcn5; Spt20; upSET; CG13463; CG12316; brm; rept; CG2051; Taf1; Ada2b; Taf12; Sbf; Spt3; trx; Set8; Caf1-55; MRG15; wda; Mocs2; Brd8; CG11539; Hcf; ne…
GO:0006475	0.000256988	28.5316	0.12605	3	73	internal protein amino acid acetylation	0.00187283	10	CG11412; Parg; Tip60; mof; HDAC4; e(y)1; Spt7; Ada3; Ing3; CoRest; CG17003; Taf10b; Elp3; lid; Gas41; Atac1; CG12560; D12; YL-1; Sirt1; CG9293; NC2beta; Atac2; msl-1; Nipped-A; MrgBP; E(Pc); Bap55; CG10931; DMAP1; Sgf29; enok; Atac3; HDAC1; Eaf6; eco; CG3967; Naa60; Gcn5; Spt20; upSET; CG13463; CG12316; brm; rept; CG2051; Taf1; Ada2b; Taf12; Sbf; Spt3; trx; Set8; Caf1-55; MRG15; wda; Mocs2; Brd8;…
GO:0018393	0.000256988	28.5316	0.12605	3	73	internal peptidyl-lysine acetylation	0.00187283	10	CG11412; Parg; Tip60; mof; HDAC4; e(y)1; Spt7; Ada3; Ing3; CoRest; CG17003; Taf10b; Elp3; lid; Gas41; Atac1; CG12560; D12; YL-1; Sirt1; CG9293; NC2beta; Atac2; msl-1; Nipped-A; MrgBP; E(Pc); Bap55; CG10931; DMAP1; Sgf29; enok; Atac3; HDAC1; Eaf6; eco; CG3967; Naa60; Gcn5; Spt20; upSET; CG13463; CG12316; brm; rept; CG2051; Taf1; Ada2b; Taf12; Sbf; Spt3; trx; Set8; Caf1-55; MRG15; wda; Mocs2; Brd8;…
GO:0018394	0.000256988	28.5316	0.12605	3	73	peptidyl-lysine acetylation	0.00187283	10	CG11412; Parg; Tip60; mof; HDAC4; e(y)1; Spt7; Ada3; Ing3; CoRest; CG17003; Taf10b; Elp3; lid; Gas41; Atac1; CG12560; D12; YL-1; Sirt1; CG9293; NC2beta; Atac2; msl-1; Nipped-A; MrgBP; E(Pc); Bap55; CG10931; DMAP1; Sgf29; enok; Atac3; HDAC1; Eaf6; eco; CG3967; Naa60; Gcn5; Spt20; upSET; CG13463; CG12316; brm; rept; CG2051; Taf1; Ada2b; Taf12; Sbf; Spt3; trx; Set8; Caf1-55; MRG15; wda; Mocs2; Brd8;…
GO:0006473	0.000267547	28.1275	0.127776	3	74	protein acetylation	0.00187283	10	CG11412; Parg; Tip60; mof; HDAC4; e(y)1; Spt7; Ada3; Ing3; CoRest; CG17003; Taf10b; Elp3; lid; Gas41; Atac1; CG12560; D12; YL-1; Sirt1; CG9293; NC2beta; Atac2; msl-1; Nipped-A; MrgBP; E(Pc); Bap55; CG10931; DMAP1; Sgf29; enok; Atac3; HDAC1; Eaf6; eco; CG3967; Naa60; Gcn5; Spt20; upSET; CG13463; CG12316; brm; rept; CG2051; Taf1; Ada2b; Taf12; Sbf; Spt3; trx; Set8; Caf1-55; MRG15; wda; Mocs2; Brd8;…
GO:0060857	0.000336578	90.75	0.0276273	2	16	establishment of glial blood-brain barrier	0.00205267	10	pck; moody; Nrg; nrv2; gcm; kune; Galphao; cora; Mdr65; Galphai; Nrx-IV; Cont; CG8121; CG7713; loco; l(3)06664
GO:0009987	0.000377021	12.9561	13.6186	21	7887	cellular process	0.00205267	10	CG3038; G9a; cin; ewg; CG13375; y; ac; sc; l(1)sc; pcl; ase; CG18273; CG3156; CG17896; CG17778; elav; Appl; vnd; CG13366; mod(r); RpL36; l(1)1Bi; Dredd; su(sable); Roc1a; Hmt4-20; SkpA; sdk; CG5254; RpL22; fz3; tw; Rbf; Sec22; MED22; CG3708; TRAM; mus81; CG3703; CG3699; CG3690; TfIIA-S-2; CDC45L; su(w[a]); eIF4E-7; CG14624; CG11398; CG11403; CG32812; DAAM; CG11412; CG11418; CG12773; CG11417; png;…
GO:0060856	0.00042824	79.3937	0.0310808	2	18	establishment of blood-brain barrier	0.00209838	10	pck; moody; Nrg; cold; Rbp9; nrv2; gcm; kune; Galphao; cora; Mdr65; Galphai; Nrx-IV; Cont; CG8121; CG7713; loco; l(3)06664
GO:0043543	0.000593078	21.2066	0.167491	3	97	protein acylation	0.00264189	10	CG11412; Parg; Tip60; mof; HDAC4; e(y)1; Spt7; Ada3; Ing3; CoRest; CG17003; CG17075; Taf10b; GABPI; Elp3; lid; Gas41; Atac1; CG12560; D12; Dnz1; YL-1; Patsas; Sirt1; CG9293; NC2beta; Atac2; msl-1; Nipped-A; MrgBP; CG1407; E(Pc); CG4676; CG8314; CG17287; Bap55; CG10931; DMAP1; Sgf29; CG10344; enok; Atac3; HDAC1; Eaf6; eco; Nmt; CG4483; CG3967; Naa60; app; Gcn5; Spt20; upSET; CG13463; CG12316; brm;…
GO:0044763	0.000672764	5.25383	10.1634	18	5886	single-organism cellular process	0.00274712	10	CG3038; G9a; ewg; CG13375; y; ac; sc; l(1)sc; pcl; ase; CG18273; CG3156; CG17896; CG17778; Appl; vnd; CG13366; Dredd; Roc1a; Hmt4-20; SkpA; sdk; CG5254; RpL22; fz3; tw; Rbf; Sec22; MED22; TRAM; mus81; CG3703; CG3699; CG3690; CDC45L; CG14624; CG11398; CG11403; DAAM; CG11412; CG12773; CG11417; png; CG11448; Lrpprc2; Ns3; O-fut2; pck; Rab27; mei-38; rush; sta; Nmdar2; dor; hfw; CG14798; Scgdelta; Ad…
GO:0018205	0.00112774	16.8613	0.208932	3	121	peptidyl-lysine modification	0.00425071	10	G9a; Hmt4-20; CG11412; trr; Parg; Tip60; mof; Btnd; Cfp1; Pa1; CG12717; HDAC4; Set2; e(y)1; Spt7; Ada3; Ing3; Ulp1; CG7889; CoRest; CG17003; CG11023; lwr; Taf10b; Elp3; Ncoa6; lid; Gas41; Atac1; smt3; Mnn1; CG12560; Su(var)205; Wdr82; D12; Utx; Dpy-30L1; YL-1; esc; escl; Sirt1; CG9293; NC2beta; Atac2; msl-1; Nipped-A; MrgBP; E(Pc); BEAF-32; Bap55; CG10931; DMAP1; Sgf29; Rtf1; Lpt; yki; enok; egg;…
GO:0048468	0.00137654	4.45709	2.96821	9	1719	cell development	0.00475253	10	G9a; ac; Appl; vnd; CG13366; Dredd; Roc1a; SkpA; sdk; CG5254; tw; Rbf; MED22; CG3703; CDC45L; CG11398; DAAM; CG11448; pck; rush; dor; Scgdelta; arm; mip130; usp; Actn; moody; CG4061; ph-p; Vinc; crn; Raf; gt; egh; Tsp3A; PI4KIIIalpha; sgg; fs(1)Yb; rst; N; dnc; Myc; Mnt; Rala; fd3F; CG2901; ec; lva; brn; Fas2; CG15571; Femcoat; Muc4B; norpA; peb; ctp; Ptp4E; ovo; snf; spoon; GAA1; Act5C; raptor; …
GO:0019991	0.00145485	40.929	0.0569814	2	33	septate junction assembly	0.00475253	10	pck; moody; bou; Nrg; dlg1; l(2)gl; cold; nrv2; wol; crok; Gli; vari; kune; wun; Galphao; Lac; cora; Galphai; crim; Nrx-IV; Tsf2; Ssk; Cont; CG8121; GckIII; CG7713; loco; mesh; hty; Ran; ear; l(3)06664; Src64B
GO:0021782	0.00163605	38.4424	0.0604348	2	35	glial cell development	0.00501039	10	vnd; pck; moody; Nrg; fog; rau; nrv2; gcm; gcm2; salm; kune; Galphao; pyr; ths; cora; Sdc; fd59A; sty; Mdr65; Galphai; Nrx-IV; not; Cont; CG8121; svp; stumps; CG7713; htl; loco; dcm; dv; l(3)ry78; l(3)06664; Fs(3)Jut; l(1)12P2
GO:0022008	0.00206868	4.45485	2.51063	8	1454	neurogenesis	0.00574532	10	G9a; ac; sc; l(1)sc; pcl; ase; CG18273; Appl; vnd; Dredd; Roc1a; SkpA; sdk; MED22; CG3703; CDC45L; CG11398; DAAM; CG11417; CG11448; pck; rush; arm; usp; moody; CG4061; CG16903; Unc-76; ph-p; Nmd3; Vinc; kz; crn; Raf; gt; boi; egh; rst; N; dnc; Myc; CG2875; Mnt; Rala; fd3F; CG2901; lva; Fas2; CG3527; peb; pon; ctp; Ptp4E; ovo; Sas10; Mcm3; GAA1; raptor; sqh; Spx; Rpt4; CG3224; shf; pod1; Nf-YC; cm…
GO:0010001	0.00224063	32.5128	0.0707951	2	41	glial cell differentiation	0.00574532	10	vnd; pck; moody; N; Nrg; fog; rau; nrv2; gcm; gcm2; salm; kune; Galphao; pyr; ths; cora; Sdc; fd59A; sty; Mdr65; Galphai; Nrx-IV; not; hkb; Cont; CG8121; pros; svp; stumps; CG7713; htl; loco; dcm; oho48E; dv; ogre; l(3)ry78; red; l(3)06664; Fs(3)Jut; l(1)12P2
GO:0016570	0.00229479	13.0544	0.26764	3	155	histone modification	0.00574532	10	G9a; Hmt4-20; CG11412; trr; CG12498; Parg; Tip60; CG2982; Sirt4; mof; Btnd; Cdc7; Cfp1; Pa1; Usp7; HDAC4; Set2; HDAC6; e(y)1; Spt7; Ada3; Ing3; CoRest; ebi; CG12674; Atxn7; Taf10b; Elp3; Ncoa6; lid; Gas41; Atac1; Mnn1; LKRSDH; CG12560; Su(var)205; Wdr82; D12; borr; Utx; Dpy-30L1; aurB; YL-1; Art8; esc; escl; Sirt1; CG9293; NC2beta; sna; Atac2; msl-1; Nipped-A; Incenp; Kdm4A; MrgBP; Ntmt; E(Pc); C…
GO:0016569	0.0024234	12.7986	0.27282	3	158	covalent chromatin modification	0.00574532	10	G9a; Hmt4-20; CG11412; trr; CG12498; Parg; Tip60; CG2982; Sirt4; mof; Btnd; Cdc7; Cfp1; Pa1; Usp7; HDAC4; Set2; HDAC6; e(y)1; Spt7; Ada3; Ing3; CoRest; ebi; CG12674; Atxn7; Taf10b; Elp3; Ncoa6; lid; Gas41; Atac1; Mnn1; LKRSDH; CG12560; Su(var)205; Wdr82; D12; borr; Utx; Dpy-30L1; aurB; YL-1; piwi; Art8; esc; escl; Sirt1; CG9293; NC2beta; sna; Atac2; msl-1; Nipped-A; Incenp; Kdm4A; MrgBP; Ntmt; wd…
GO:0043297	0.00246228	30.922	0.0742485	2	43	apical junction assembly	0.00574532	10	pck; arm; moody; bou; Nrg; dlg1; baz; par-6; l(2)gl; cold; nrv2; wol; crok; Gli; vari; kune; wun; Galphao; Lac; cora; shg; kst; Galphai; crim; Nrx-IV; Tsf2; Ssk; Cont; CG8121; GckIII; CG7713; loco; crb; mesh; hty; Ran; nate; ear; sie; l(3)06664; l(2)k06107; Src64B; CG33506
GO:0048812	0.00273451	6.16682	1.0084	5	584	neuron projection morphogenesis	0.00609049	10	G9a; Appl; CG3703; CDC45L; CG11398; DAAM; CG11448; rush; usp; Vinc; gt; egh; rst; N; dnc; Mnt; fd3F; lva; Fas2; Ptp4E; raptor; pod1; Nf-YC; sn; CG2116; Smox; Trf2; Nrg; oc; Ppt1; Moe; fend; ZAP3; spri; Dlic; dsh; Ptp10D; bif; Tango10; LIMK1; CG1463; CG12717; hep; Bap60; mew; CG2691; ben; CG11584; NetA; NetB; rut; Efhc1.1; if; CG4829; Nprl2; Rcp; RhoGAPp190; beta-Spec; Sh; CG6867; Wnt5; wgn; Ulp1;…
GO:0031175	0.00316516	5.95109	1.04293	5	604	neuron projection development	0.00650612	10	G9a; Appl; CG3703; CDC45L; CG11398; DAAM; CG11448; rush; usp; CG4061; Vinc; gt; egh; rst; N; dnc; Mnt; fd3F; lva; Fas2; Ptp4E; raptor; pod1; Nf-YC; sn; CG2116; Smox; Trf2; Nrg; oc; Ppt1; Moe; fend; ZAP3; spri; Imp; Dlic; dsh; Ptp10D; bif; Tango10; LIMK1; CG1463; CG12717; hep; Bap60; mew; CG2691; ben; CG11584; NetA; NetB; rut; Efhc1.1; if; CG4829; Nprl2; Rcp; RhoGAPp190; beta-Spec; Sh; CG6867; Wnt…
GO:0035151	0.00318667	26.9617	0.0846087	2	49	regulation of tube size, open tracheal system	0.00650612	10	pck; Fas2; sqh; Nrg; rtv; dsh; Chc; wus; cold; ds; Sec24CD; dpp; bark; ft; mmy; nrv2; crok; Gli; vari; kune; stan; garz; Lac; conv; Rho1; grh; fj; sano; cora; Mmp1; zip; crim; Nrx-IV; verm; serp; knrl; kni; CG8121; CG7713; gammaCOP; Ran; cathD; gg; stout; l(3)06664; l(1)1Ac; l(2)Ta; Src64B; Dsp1
GO:0007043	0.00344773	25.8571	0.0880622	2	51	cell-cell junction assembly	0.00653667	10	pck; arm; moody; kirre; Bteb2; bou; nullo; Nrg; dlg1; baz; par-6; shakB; l(2)gl; cold; bark; nrv2; wol; crok; Gli; vari; kune; wun; Galphao; Lac; cora; shg; kst; Galphai; crim; Nrx-IV; Tsf2; Ssk; Cont; pyd; CG8121; GckIII; CG7713; loco; crb; mesh; hty; Ran; rasp; nate; ear; sie; l(3)06664; l(2)k06107; Src64B; Su(Gl)27; CG33506
GO:0006996	0.00346844	3.82795	3.37917	9	1957	organelle organization	0.00653667	10	G9a; ase; CG17778; CG13366; Hmt4-20; SkpA; RpL22; tw; Sec22; MED22; CG3708; mus81; CDC45L; DAAM; CG11412; Lrpprc2; mei-38; rush; sta; dor; CG14798; Scgdelta; Pex5; Pgam5; Vps26; trr; arm; mip130; Ocrl; Actn; moody; ph-p; wapl; pn; Vinc; pcx; crn; PsGEF; z; egh; Klp3A; eIF3ga; PI4KIIIalpha; sgg; fs(1)Ya; ttm50; CG12498; N; ng4; Parg; Vap-33A; cib; dgt4; Tip60; mei-9; CG2982; rb; ctp; CG4041; Cdk7;…
GO:0035150	0.00371849	24.8392	0.0915156	2	53	regulation of tube size	0.00674836	10	pck; Fas2; sqh; Nrg; rtv; dsh; Chc; wus; cold; ds; Sec24CD; dpp; bark; ft; mmy; nrv2; crok; Gli; vari; kune; EcR; stan; garz; Lac; conv; Rho1; grh; fj; sano; cora; Mmp1; zip; crim; Nrx-IV; verm; serp; knrl; kni; CG8121; CG7713; tnc; gammaCOP; Ran; rex; ru; cathD; gg; stout; l(3)06664; l(1)1Ac; l(2)Ta; Src64B; Dsp1
GO:0034329	0.00399887	23.8981	0.094969	2	55	cell junction assembly	0.00699802	10	pck; arm; moody; kirre; Bteb2; bou; nullo; Nrg; dlg1; baz; par-6; shakB; l(2)gl; cold; bark; PDZ-GEF; nrv2; wol; crok; Gli; vari; kune; wun; Galphao; Lac; cora; shg; Rap1; kst; Galphai; crim; Nrx-IV; Tsf2; Ssk; Cont; pyd; CG8121; GckIII; CG7713; loco; crb; mesh; Rok; jbug; hty; Ran; rasp; nate; ear; sie; l(3)06664; l(2)k06107; Src64B; Su(Gl)27; CG33506
GO:0048858	0.00442753	5.47885	1.12754	5	653	cell projection morphogenesis	0.00737175	10	G9a; Appl; CG3703; CDC45L; CG11398; DAAM; CG11448; rush; usp; Vinc; gt; egh; rst; N; dnc; Mnt; fd3F; lva; Fas2; Ptp4E; raptor; pod1; Nf-YC; sn; CG2116; Smox; Trf2; Nrg; oc; Ppt1; Moe; fend; ZAP3; spri; Dlic; Kap3; dsh; Ptp10D; bif; Tango10; LIMK1; CG1463; CG12717; hep; Bap60; mew; CG2691; ben; CG11584; NetA; NetB; rut; Efhc1.1; if; CG4829; Nprl2; Rcp; RhoGAPp190; beta-Spec; Sh; CG6867; Wnt5; wgn;…
GO:0090066	0.00451431	10.194	0.340162	3	197	regulation of anatomical structure size	0.00737175	10	Rbf; DAAM; pck; PsGEF; gt; Myc; Fas2; spoon; sqh; Nrg; Erk7; Lst8; rtv; dsh; bif; lic; Chc; Myb; Arp2; mbt; Nprl2; wus; Arpc3B; RhoGAPp190; upd1; Wnt5; Hs3st-B; rictor; Cdc42; vfl; pico; Pi3K21B; RpI135; cold; ds; cpb; Sec24CD; dpp; Arpc5; lilli; Thor; bark; capu; ft; Arpc4; mmy; nrv2; wg; Wnt6; Rack1; Btk29A; Sema-1a; bib; SCAR; ab; crok; aret; kuz; p38b; Arpc1; CycE; Gli; GMF; Syx5; CadN; Lar; …
GO:0032990	0.00466376	5.40845	1.14135	5	661	cell part morphogenesis	0.00737175	10	G9a; Appl; CG3703; CDC45L; CG11398; DAAM; CG11448; rush; usp; Vinc; gt; egh; rst; N; dnc; Mnt; fd3F; lva; Fas2; Ptp4E; raptor; Marf; pod1; Nf-YC; sn; CG2116; Smox; Trf2; Nrg; oc; Ppt1; Moe; fend; ZAP3; spri; Dlic; Kap3; dsh; Ptp10D; bif; Tango10; LIMK1; CG1463; CG12717; hep; Bap60; mew; CG2691; ben; CG11584; NetA; NetB; rut; Efhc1.1; if; CG4829; Nprl2; Rcp; RhoGAPp190; beta-Spec; Sh; CG6867; Wnt5…
GO:0030154	0.00491957	3.46479	4.27533	10	2476	cell differentiation	0.00753308	10	G9a; ac; sc; l(1)sc; pcl; ase; CG18273; Appl; vnd; CG13366; Dredd; Roc1a; SkpA; sdk; CG5254; tw; Rbf; MED22; CG3703; CG3690; CDC45L; CG14624; CG11398; DAAM; CG11417; CG11448; pck; rush; dor; Scgdelta; arm; mip130; usp; Actn; moody; CG4061; CG16903; Unc-76; ph-p; Nmd3; Vinc; pcx; kz; crn; Raf; gt; boi; egh; Tsp3A; PI4KIIIalpha; sgg; fs(1)Yb; rst; kirre; N; dnc; Myc; CG2875; Mnt; Rala; fd3F; CG2901…
GO:0044699	0.00525091	4.4836	12.8916	19	7466	single-organism process	0.0077968	10	CG3038; G9a; CG13377; cin; ewg; CG13375; Or1a; y; ac; sc; l(1)sc; pcl; ase; Cyp4g1; CG18273; CG3156; CG17896; CG17778; svr; elav; CG4293; Appl; vnd; CG13366; CG13369; Dredd; Roc1a; Hmt4-20; SkpA; sdk; CG5254; RpL22; fz3; tw; Rbf; Sec22; MED22; TRAM; mus81; CG3703; CG3699; CG3690; CDC45L; CG14624; CG11382; CG11398; CG3638; CG11403; DAAM; CG11412; CG12773; CG11417; png; CG11448; Lrpprc2; Ns3; O-fut…
GO:0007399	0.00542668	3.74192	2.92332	8	1693	nervous system development	0.0078208	10	G9a; CG13377; ewg; ac; sc; l(1)sc; pcl; ase; CG18273; elav; Appl; vnd; Dredd; Roc1a; SkpA; sdk; MED22; CG3703; CDC45L; CG11398; CG3638; DAAM; CG11417; CG11448; pck; rush; arm; usp; moody; CG4061; CG16903; Unc-76; ph-p; Nmd3; Vinc; kz; crn; Raf; PsGEF; gt; boi; egh; PI4KIIIalpha; sgg; rst; N; dnc; Myc; CG2875; Mnt; Rala; fd3F; CG2901; Vap-33A; lva; cib; Tip60; Fas2; CG3527; peb; pon; ctp; Ptp4E; o…
GO:1902589	0.00641109	3.90091	2.35868	7	1366	single-organism organelle organization	0.0089713	10	G9a; ase; CG17778; CG13366; Hmt4-20; SkpA; RpL22; tw; Sec22; MED22; mus81; CDC45L; DAAM; CG11412; Lrpprc2; mei-38; sta; dor; CG14798; Scgdelta; Pex5; trr; arm; mip130; Ocrl; Actn; moody; ph-p; wapl; Vinc; crn; PsGEF; egh; Klp3A; eIF3ga; PI4KIIIalpha; sgg; fs(1)Ya; ttm50; CG12498; N; ng4; Parg; Vap-33A; cib; dgt4; Tip60; mei-9; CG2982; ctp; Cdk7; dhd; spoon; Sirt4; RpL35; CG4078; mof; rux; Btnd; s…
GO:0048869	0.00666536	3.29246	4.45318	10	2579	cellular developmental process	0.0089713	10	G9a; ac; sc; l(1)sc; pcl; ase; CG18273; Appl; vnd; CG13366; Dredd; Roc1a; SkpA; sdk; CG5254; tw; Rbf; MED22; CG3703; CG3690; CDC45L; CG14624; CG11398; DAAM; CG11417; CG11448; pck; rush; dor; Scgdelta; arm; mip130; usp; Actn; moody; CG4061; CG16903; Unc-76; ph-p; Nmd3; Vinc; pcx; kz; crn; Raf; gt; boi; egh; Tsp3A; PI4KIIIalpha; sgg; fs(1)Yb; rst; kirre; N; dnc; Myc; CG2875; Mnt; Rala; fd3F; CG2901…
GO:0045216	0.00694524	17.8141	0.12605	2	73	cell-cell junction organization	0.0089713	10	pck; arm; moody; kirre; Bteb2; RhoGAP5A; bou; nullo; Nrg; dlg1; baz; par-6; shakB; l(2)gl; cold; bark; Traf4; PDZ-GEF; nrv2; wol; crok; sna; Gli; vari; kune; Src42A; wun; Mmp2; Galphao; Lac; cora; shg; Mmp1; Rac1; Rap1; kst; Cip4; Galphai; Rac2; crim; Nrx-IV; Tsf2; Ssk; alpha-Cat; Cont; pyd; CG8121; Csk; CG5205; GckIII; CG7713; Rab11; loco; jar; crb; mesh; awd; jbug; hty; Ran; rasp; nate; ear; si…
GO:0034330	0.00713073	17.5653	0.127776	2	74	cell junction organization	0.0089713	10	pck; arm; moody; kirre; Bteb2; RhoGAP5A; bou; nullo; Nrg; dlg1; baz; par-6; shakB; l(2)gl; cold; bark; Traf4; PDZ-GEF; nrv2; wol; crok; sna; Gli; vari; kune; Src42A; wun; Mmp2; Galphao; Lac; cora; shg; Mmp1; Rac1; Rap1; kst; Cip4; Galphai; Rac2; crim; Nrx-IV; Tsf2; Ssk; alpha-Cat; Cont; pyd; CG8121; Csk; CG5205; GckIII; CG7713; Rab11; loco; jar; crb; mesh; awd; Rok; jbug; hty; Ran; rasp; nate; ea…
GO:0018193	0.00762443	8.38791	0.410957	3	238	peptidyl-amino acid modification	0.0089713	10	G9a; Hmt4-20; CG11412; trr; Parg; Tip60; CG15767; mof; Btnd; CG3184; nonC; Ost48; Cfp1; Ptpmeg2; sev; Pa1; hop; FucT6; CG12717; HDAC4; Set2; Tango13; Cyp1; mei-41; mbt; CG8918; e(y)1; Spt7; Ada3; upd1; Ing3; Ulp1; CG7889; CoRest; et; CG17003; CG11023; lwr; ninaA; Eogt; Taf10b; CG3964; Art2; Elp3; Ncoa6; lid; Wee1; Gas41; Atac1; smt3; Mnn1; LKRSDH; CG12560; Su(var)205; Btk29A; Wdr82; D12; Utx; Dpy…
GO:0048666	0.00763649	4.77483	1.28294	5	743	neuron development	0.0089713	10	G9a; Appl; Dredd; Roc1a; SkpA; CG3703; CDC45L; CG11398; DAAM; CG11448; rush; usp; CG4061; ph-p; Vinc; gt; egh; rst; N; dnc; Mnt; fd3F; CG2901; lva; Fas2; peb; ctp; Ptp4E; GAA1; raptor; shf; pod1; Nf-YC; sn; CG2116; Smox; Trf2; Nrg; oc; Ppt1; Moe; fend; lz; ZAP3; spri; Imp; sev; Dlic; dsh; Ptp10D; bif; Tango10; pot; Ten-a; LIMK1; CG1463; CG12717; hep; Bap60; mew; CG2691; ben; CG11584; NetA; NetB; …
GO:0030030	0.00776575	4.75431	1.28812	5	746	cell projection organization	0.0089713	10	G9a; pcl; Appl; CG3703; CDC45L; CG11398; DAAM; CG11448; rush; usp; CG4061; Vinc; PsGEF; gt; egh; rst; N; dnc; Mnt; fd3F; lva; Fas2; Ptp4E; ovo; raptor; sqh; pod1; Nf-YC; sn; CG2116; Smox; Trf2; Nrg; oc; Ppt1; Moe; fend; ZAP3; spri; Imp; Myo10A; Dlic; Kap3; dsh; Ptp10D; bif; Tango10; fw; LIMK1; CG1463; CG12717; hep; Bap60; mew; CG2691; ben; CG11584; NetA; NetB; rut; Efhc1.1; Arp2; SMC3; if; CG4829…
GO:0035152	0.00809169	16.4182	0.13641	2	79	regulation of tube architecture, open tracheal system	0.0089713	10	DAAM; pck; Fas2; peb; sqh; bou; Nrg; Moe; Zpr1; rtv; dsh; mew; Chc; if; wus; cold; ds; Sec24CD; dpp; bark; ft; mmy; nrv2; uif; crok; Gli; IKKepsilon; vari; Mtp; kune; Syb; stan; garz; Lac; shot; conv; Rho1; grh; fj; sano; cora; shg; Egfr; Mmp1; zip; klar; rho; Blimp-1; rhea; crim; Nrx-IV; Mkp3; verm; serp; knrl; kni; Sec23; CG8121; wkd; cv-c; CG7713; bnl; wat; gammaCOP; awd; Ran; ru; Esm; cathD; …
GO:0000054	0.00860513	151.369	0.00863355	1	5	ribosomal subunit export from nucleus	0.0089713	10	Ns3; Nmd3; emb; Mys45A; CG7686
GO:0016457	0.00860513	151.369	0.00863355	1	5	dosage compensation complex assembly involved in dosage compensation by hyperactivation of X chromosome	0.0089713	10	msl-2; msl-1; mle; CG33766; 5SrRNA:CR33373
GO:0033750	0.00860513	151.369	0.00863355	1	5	ribosome localization	0.0089713	10	Ns3; Nmd3; emb; Mys45A; CG7686
GO:0033753	0.00860513	151.369	0.00863355	1	5	establishment of ribosome localization	0.0089713	10	Ns3; Nmd3; emb; Mys45A; CG7686
GO:0043984	0.00860513	151.369	0.00863355	1	5	histone H4-K16 acetylation	0.0089713	10	mof; CoRest; Atac2; msl-1; CG12316
GO:0016568	0.00930825	7.7799	0.442038	3	256	chromatin modification	0.00931759	10	G9a; Hmt4-20; CG11412; trr; z; CG12498; Parg; Tip60; CG2982; Sirt4; mof; Act5C; Btnd; Cdc7; Hira; HP1b; Bap111; Cfp1; Pa1; Chrac-16; Usp7; Bap60; HDAC4; Set2; Top1; HDAC6; Arp6; Nup153; e(y)1; Spt7; Arp8; Ada3; Ing3; CoRest; e(y)3; Hers; ebi; CG12674; Atxn7; Elba2; Taf10b; Chd1; okr; Elp3; Bsg25A; Elba3; Ncoa6; Hel25E; lid; Gas41; Atac1; Mnn1; LKRSDH; CG12560; Su(var)205; Wdr82; D12; borr; Utx; D…
GO:0042063	0.00931759	15.2241	0.14677	2	85	gliogenesis	0.00931759	10	vnd; pck; moody; crn; N; Nrg; NetA; NetB; eag; bnb; Mer; amn; fog; ine; rau; nrv2; numb; gcm; gcm2; salm; kuz; GMF; kune; jing; so; Galphao; pyr; ths; fra; unc-5; sli; Rho1; cora; hpo; Sdc; fd59A; yki; Rac1; sty; ago; Mdr65; Galphai; RIOK1; Nrx-IV; btl; not; Sgf11; hkb; Cont; cno; tgo; CG8121; Ras85D; pros; svp; stumps; kibra; CSN5; CG7713; htl; Dl; bnl; slmb; how; loco; hh; RIOK2; XNP; Nf1; Ser;…
GO:0072347	0.000217604	120.971	0.0226042	2	9	response to anesthetic	0.00359225	11	Pex5; Pgam5; sgg; alpha-Man-Ia; ben; unc79; l(3)87Ae; net; l(3)A519.1F3
GO:0032502	0.000256589	3.68494	9.99105	20	3978	developmental process	0.00359225	11	G9a; CG13377; cin; ewg; y; ac; sc; l(1)sc; pcl; ase; CG18273; svr; elav; Appl; vnd; CG13366; Dredd; Roc1a; SkpA; sdk; CG5254; RpL22; tw; Rbf; MED22; CG3703; CG3690; CDC45L; CG14624; CG11382; CG11398; CG3638; DAAM; CG11417; CG11448; Ns3; pck; rush; dor; hfw; a6; Scgdelta; Pgam5; trr; arm; mip130; Edem1; Hr4; usp; Actn; moody; CG4061; CG16903; Unc-76; ph-p; pn; Nmd3; Vinc; pcx; kz; crn; temp; Ilp6;…
GO:0044767	0.000788753	3.28053	9.88557	19	3936	single-organism developmental process	0.00736169	11	G9a; CG13377; cin; ewg; y; ac; sc; l(1)sc; pcl; ase; CG18273; svr; elav; Appl; vnd; CG13366; Dredd; Roc1a; SkpA; sdk; CG5254; RpL22; tw; Rbf; MED22; CG3703; CG3690; CDC45L; CG14624; CG11382; CG11398; CG3638; DAAM; CG11417; CG11448; Ns3; pck; rush; dor; hfw; a6; Scgdelta; trr; arm; mip130; Edem1; Hr4; usp; Actn; moody; CG4061; CG16903; Unc-76; ph-p; pn; Nmd3; Vinc; pcx; kz; crn; temp; Ilp6; Raf; P…
GO:0042493	0.00124569	44.5263	0.0527431	2	21	response to drug	0.0080954	11	Pex5; Pgam5; sgg; alpha-Man-Ia; ben; para; Mdr49; Mdr50; S6k; CG10226; Rdl; Mrp4; unc79; VAChT; slo; l(3)87Ae; net; Reph; l(3)A519.1F3; SIFa; vtd
GO:0048856	0.00258781	2.88888	9.03665	17	3598	anatomical structure development	0.0080954	11	G9a; CG13377; cin; ewg; y; ac; sc; l(1)sc; pcl; ase; CG18273; svr; elav; Appl; vnd; CG13366; Dredd; Roc1a; SkpA; sdk; CG5254; tw; Rbf; MED22; CG3703; CDC45L; CG11382; CG11398; CG3638; DAAM; CG11417; CG11448; pck; rush; dor; a6; Scgdelta; Pgam5; trr; arm; mip130; Hr4; usp; Actn; moody; CG4061; CG16903; Unc-76; ph-p; pn; Nmd3; Vinc; kz; crn; temp; Raf; PsGEF; gt; boi; egh; Tsp3A; PI4KIIIalpha; sgg;…
GO:0003012	0.00307371	27.2645	0.082882	2	33	muscle system process	0.0080954	11	Sclp; up; Eaat1; aret; Pkd2; Ca-alpha1D; Mhc; CG2121; FMRFa; KCNQ; Amph; Arc1; tn; zip; MsR2; MsR1; Chd64; Mp; Fhos; Lasp; fln; Neurochondrin; Tm1; CG6972; Syx1A; Mlc1; Mlc2; At; Low; dsp; l(3)A519.1F3; CR44401; CR44773
GO:0014706	0.00326071	26.4104	0.0853936	2	34	striated muscle tissue development	0.0080954	11	rst; kirre; N; sd; wupA; vkg; Cg25C; LanB1; rost; kuz; EcR; blow; Mef2; Khc; Act57B; twi; Mlp60A; Fit1; ens; Fit2; Mlp84B; abd-A; tin; lbl; lbe; lmd; nau; mbc; sol; Mkrn1; hdp-b; Vha16-1; Amy-p; CG33641
GO:0008015	0.00345293	25.6081	0.0879052	2	35	blood circulation	0.0080954	11	Scgdelta; Ctr1A; fh; Ork1; cac; rad; eag; wupA; amn; tim; vri; Acer; Nos; AstC; FMRFa; Jra; KCNQ; pain; Shab; Clk; cyc; Psn; Crz; how; CCAP; Capa; Sox102F; Low; fs(1)M8; ptg; l(3)A519.1F3; Fs(1)10A; fs(1)60; CR44401; CR44773
GO:0035159	0.00345293	25.6081	0.0879052	2	35	regulation of tube length, open tracheal system	0.0080954	11	Fas2; sqh; rtv; dsh; Chc; wus; ds; Sec24CD; dpp; bark; ft; nrv2; vari; kune; stan; garz; conv; Rho1; grh; fj; sano; Mmp1; zip; verm; serp; CG8121; CG7713; gammaCOP; Ran; cathD; gg; stout; l(1)1Ac; Src64B; Dsp1
GO:0060047	0.00345293	25.6081	0.0879052	2	35	heart contraction	0.0080954	11	Scgdelta; Ctr1A; fh; Ork1; cac; rad; eag; wupA; amn; tim; vri; Acer; Nos; AstC; FMRFa; Jra; KCNQ; pain; Shab; Clk; cyc; Psn; Crz; how; CCAP; Capa; Sox102F; Low; fs(1)M8; ptg; l(3)A519.1F3; Fs(1)10A; fs(1)60; CR44401; CR44773
GO:0060537	0.00345293	25.6081	0.0879052	2	35	muscle tissue development	0.0080954	11	rst; kirre; N; sd; wupA; vkg; Cg25C; LanB1; rost; kuz; EcR; blow; Mef2; Khc; Act57B; twi; Mlp60A; Fit1; ens; Fit2; Mlp84B; abd-A; tin; lbl; lbe; E2f1; lmd; nau; mbc; sol; Mkrn1; hdp-b; Vha16-1; Amy-p; CG33641
GO:0006030	0.00346946	10.9447	0.306412	3	122	chitin metabolic process	0.0080954	11	Mur2B; Cht11; Idgf4; Cht6; rtv; Muc11A; CG34324; Mur18B; Muc18B; obst-A; Peritrophin-A; Cda4; Cda5; obst-E; mmy; CG8460; obst-B; Idgf1; Idgf2; Idgf3; ChLD3; reb; exp; CG8192; CG5210; CG5756; Idgf5; Cht8; Cht9; Cht2; CG13806; CG32302; Cht7; CG14957; ckd; CG12009; CG4835; CG13676; CG13675; CG13312; CG13308; CG13309; Tequila; CG32036; Muc68D; CG5897; CG5883; CG7252; CG17826; obst-G; CG7248; CG11570;…
GO:1901071	0.00423746	10.1678	0.329017	3	131	glucosamine-containing compound metabolic process	0.00833529	11	Mur2B; Cht11; Idgf4; Cht6; rtv; Muc11A; CG34324; Mur18B; Muc18B; obst-A; Peritrophin-A; CG17065; Cda4; Cda5; Oscillin; obst-E; mmy; CG8460; obst-B; Idgf1; Idgf2; Idgf3; ChLD3; reb; exp; CG18278; beta4GalNAcTA; ttv; CG8192; CG5210; CG5756; Idgf5; botv; Cht8; Cht9; Cht2; CG13806; CG32302; Cht7; CG14957; ckd; CG12009; CG4835; CG13676; CG13675; CG13312; CG13308; CG13309; Tequila; CG32036; Muc68D; CG5…
GO:0006040	0.00432865	10.0882	0.331528	3	132	amino sugar metabolic process	0.00833529	11	Mur2B; Cht11; Idgf4; Cht6; rtv; Muc11A; CG34324; Mur18B; Muc18B; obst-A; Peritrophin-A; CG17065; Cda4; Cda5; Oscillin; obst-E; mmy; CG8460; obst-B; Idgf1; Idgf2; Idgf3; ChLD3; reb; exp; CG18278; beta4GalNAcTA; ttv; CG8192; CG5210; CG5756; Idgf5; botv; Cht8; Cht9; Cht2; CG13806; CG32302; Cht7; CG14957; ckd; CG12009; CG4835; CG13676; CG13675; CG13312; CG13308; CG13309; Tequila; CG32036; Muc68D; CG5…
GO:0030239	0.00471423	21.6581	0.102975	2	41	myofibril assembly	0.00833529	11	CG13366; tw; DAAM; Scgdelta; Actn; C3G; up; if; wupA; fliI; aret; Mhc; kon; Zasp52; Dg; tn; hts; zip; rhea; Zasp66; Prm; Zasp67; rt; rols; flr; Smn; Lasp; fln; Mlp84B; Mical; sals; Mf; Act88F; how; Mlc2; bt; sol; Esm; l(2)35Fg; CG43394; Acp53C14c
GO:0006022	0.00584191	9.02658	0.369202	3	147	aminoglycan metabolic process	0.00833529	11	Mur2B; Cht11; Idgf4; Cht6; rtv; Muc11A; CG34324; CG9220; Mur18B; Muc18B; obst-A; Peritrophin-A; Cda4; Cda5; obst-E; mmy; CG8460; obst-B; Idgf1; Idgf2; Idgf3; ChLD3; Hsepi; beta3GalTII; PGRP-SC1a; PGRP-SC1b; PGRP-SC2; CG12913; reb; exp; CG18278; ttv; CG8192; CG5210; CG5756; Idgf5; botv; Cht8; Cht9; CG9380; Cht2; oxt; CG13806; CG32302; Cht7; CG14957; ckd; CG12009; CG4835; sfl; sgl; CG13676; CG13675…
GO:0044699	0.00589492	3.06886	18.7514	26	7466	single-organism process	0.00833529	11	CG3038; G9a; CG13377; cin; ewg; CG13375; Or1a; y; ac; sc; l(1)sc; pcl; ase; Cyp4g1; CG18273; CG3156; CG17896; CG17778; svr; elav; CG4293; Appl; vnd; CG13366; CG13369; Dredd; Roc1a; Hmt4-20; SkpA; sdk; CG5254; RpL22; fz3; tw; Rbf; Sec22; MED22; TRAM; mus81; CG3703; CG3699; CG3690; CDC45L; CG14624; CG11382; CG11398; CG3638; CG11403; DAAM; CG11412; CG12773; CG11417; png; CG11448; Lrpprc2; Ns3; O-fut…
GO:0003013	0.00590398	19.1894	0.115533	2	46	circulatory system process	0.00833529	11	Scgdelta; Ctr1A; fh; Ork1; cac; rad; eag; wupA; amn; wry; tim; vri; H15; mid; Acer; Nos; AstC; spi; Ggamma1; FMRFa; Jra; KCNQ; cora; Egfr; pain; Shab; Clk; Nrx-IV; cyc; Psn; Crz; how; loco; CCAP; Capa; Sox102F; Low; fs(1)M8; ptg; s; l(3)06664; l(3)A519.1F3; Fs(1)10A; fs(1)60; CR44401; CR44773
GO:0003015	0.00590398	19.1894	0.115533	2	46	heart process	0.00833529	11	Scgdelta; Ctr1A; fh; Ork1; cac; rad; eag; wupA; amn; wry; tim; vri; H15; mid; Acer; Nos; AstC; spi; Ggamma1; FMRFa; Jra; KCNQ; cora; Egfr; pain; Shab; Clk; Nrx-IV; cyc; Psn; Crz; how; loco; CCAP; Capa; Sox102F; Low; fs(1)M8; ptg; s; l(3)06664; l(3)A519.1F3; Fs(1)10A; fs(1)60; CR44401; CR44773
GO:0050793	0.00622908	4.12063	1.70787	6	680	regulation of developmental process	0.00833529	11	G9a; ewg; y; SkpA; sdk; RpL22; MED22; DAAM; Ns3; Pgam5; arm; Hr4; usp; CG4061; Ilp6; Raf; gt; PI4KIIIalpha; sgg; rst; kirre; N; Myc; Rala; ec; lva; Fas2; norpA; CG3527; ctp; raptor; Top3beta; swa; Marf; Pink1; nullo; Dok; Smox; oc; Ppt1; Rbm13; CG7246; fh; Dsor1; Erk7; lz; Imp; sev; Dlic; dsh; hop; dlg1; Drak; CG1572; Met; bif; SelG; cac; Rab40; Mks1; CG43921; LIMK1; hep; lic; Pdcd4; Yp3; jub; be…
GO:0009653	0.00641816	2.88135	4.93776	11	1966	anatomical structure morphogenesis	0.00833529	11	G9a; ewg; ac; sc; l(1)sc; pcl; ase; svr; Appl; CG13366; Dredd; sdk; tw; Rbf; CG3703; CDC45L; CG11382; CG11398; DAAM; CG11448; rush; Scgdelta; Pgam5; trr; arm; mip130; Hr4; usp; Actn; ph-p; pn; Vinc; crn; Raf; gt; boi; egh; PI4KIIIalpha; sgg; fs(1)Yb; rst; kirre; N; dnc; Myc; Mnt; Rala; fd3F; ec; VhaAC39-1; lva; brn; cib; Fas2; CG15571; Femcoat; Muc4B; norpA; bi; peb; ctp; Ptp4E; ovo; spoon; RhoGA…
GO:0035151	0.00667694	17.9603	0.123067	2	49	regulation of tube size, open tracheal system	0.00833529	11	pck; Fas2; sqh; Nrg; rtv; dsh; Chc; wus; cold; ds; Sec24CD; dpp; bark; ft; mmy; nrv2; crok; Gli; vari; kune; stan; garz; Lac; conv; Rho1; grh; fj; sano; cora; Mmp1; zip; crim; Nrx-IV; verm; serp; knrl; kni; CG8121; CG7713; gammaCOP; Ran; cathD; gg; stout; l(3)06664; l(1)1Ac; l(2)Ta; Src64B; Dsp1
GO:0007275	0.00684684	2.60237	8.11993	15	3233	multicellular organism development	0.00833529	11	G9a; CG13377; cin; ewg; y; ac; sc; l(1)sc; pcl; ase; CG18273; svr; elav; Appl; vnd; CG13366; Dredd; Roc1a; SkpA; sdk; tw; MED22; CG3703; CDC45L; CG11382; CG11398; CG3638; DAAM; CG11417; CG11448; pck; rush; dor; hfw; a6; trr; arm; Edem1; Hr4; usp; moody; CG4061; CG16903; Unc-76; ph-p; pn; Nmd3; Vinc; kz; crn; temp; Raf; PsGEF; gt; boi; egh; PI4KIIIalpha; sgg; per; CG2681; crm; rst; kirre; N; dnc; …
GO:0019725	0.00725504	8.32427	0.399341	3	159	cellular homeostasis	0.00846421	11	Rbcn-3B; CG4199; Raf; Seipin; CG12206; VhaAC39-1; norpA; TrxT; dhd; Rbcn-3A; Ctr1A; Trxr-1; fh; sesB; prtp; ATP7; SelG; cac; CG18130; Fer3HCH; up; CG14407; CG9911; wupA; Tsf1; wgn; CCKLR-17D1; CG14221; Plc21C; ebi; CG18132; AIF; Pgk; CG8814; Prx6005; Scox; uif; CG4495; Rack1; CG8498; Trx-2; nAChRalpha6; CG6523; CG9302; Rab14; Syx5; chif; CaBP1; mib2; CG10700; Itgbn; Nhe2; CG7845; vimar; alc; egr;…
GO:0035150	0.00777515	16.5464	0.133114	2	53	regulation of tube size	0.00866214	11	pck; Fas2; sqh; Nrg; rtv; dsh; Chc; wus; cold; ds; Sec24CD; dpp; bark; ft; mmy; nrv2; crok; Gli; vari; kune; EcR; stan; garz; Lac; conv; Rho1; grh; fj; sano; cora; Mmp1; zip; crim; Nrx-IV; verm; serp; knrl; kni; CG8121; CG7713; tnc; gammaCOP; Ran; rex; ru; cathD; gg; stout; l(3)06664; l(1)1Ac; l(2)Ta; Src64B; Dsp1
GO:0055001	0.00835278	15.9195	0.138137	2	55	muscle cell development	0.00866214	11	CG13366; tw; DAAM; Scgdelta; Actn; C3G; up; sd; if; wupA; fliI; aop; Cg25C; LanB1; aret; Mhc; kon; Mef2; Zasp52; Dg; Khc; tn; hts; Act57B; twi; zip; Rac1; sty; ens; rhea; Zasp66; Prm; Zasp67; rt; rols; flr; Smn; Lasp; fln; Mlp84B; Mical; sals; Mf; Act88F; htl; how; pnt; Mlc2; bt; sol; brc; Esm; l(2)35Fg; CG43394; Acp53C14c
GO:0055002	0.00835278	15.9195	0.138137	2	55	striated muscle cell development	0.00866214	11	CG13366; tw; DAAM; Scgdelta; Actn; C3G; up; sd; if; wupA; fliI; aop; Cg25C; LanB1; aret; Mhc; kon; Mef2; Zasp52; Dg; Khc; tn; hts; Act57B; twi; zip; Rac1; sty; ens; rhea; Zasp66; Prm; Zasp67; rt; rols; flr; Smn; Lasp; fln; Mlp84B; Mical; sals; Mf; Act88F; htl; how; pnt; Mlc2; bt; sol; brc; Esm; l(2)35Fg; CG43394; Acp53C14c
GO:0033993	0.00956414	14.7977	0.148183	2	59	response to lipid	0.00956414	11	G9a; hfw; Hr4; usp; ph-p; Trf2; Set2; DENR; l(2)gl; dsf; Kr-h1; Utx; Hr38; Hr39; EcR; Hr46; Iswi; Hr51; swi2; rig; TBPH; Lpt; CG3209; Nurf-38; zip; DopEcR; DOR; l(3)psg2; Blimp-1; ERR; MED24; Sgs3; Tak1; Eip75B; hid; rpr; ftz-f1; rept; knrl; Eip78C; pzg; Hr78; eg; MED27; Hr83; svp; Stat92E; BRWD3; Hr96; fkh; tll; hty; brc; pch; E(da); soz; Inr-b; bic; mir-2a-2
GO:0034446	7.36729e-08	636.05	0.00941841	3	8	substrate adhesion-dependent cell spreading	6.62401e-06	12	mew; if; Tig; LanB1; LanA; Fhos; LanB2; Esm
GO:0007155	1.4533e-07	37.04	0.271957	6	231	cell adhesion	6.62401e-06	12	arm; Vinc; boi; egh; rst; kirre; N; brn; Fas2; RhoGAP5A; Nrg; dlg1; Drak; fw; Ten-a; mew; Flo2; Gbeta13F; Stim; AnxB11; mbt; if; baz; par-6; CG6788; CG6867; Vav; parvin; crq; ds; CG4629; aop; Sec24CD; ed; ft; bdl; His3.3A; tkv; Arpc4; PDZ-GEF; Tig; DIP-iota; Tsp; nrv2; santa-maria; LanB1; CG7115; pes; CG7227; bib; SCAR; crol; Arpc1; CycE; Gli; beat-Ib; beat-Ic; beat-IIIb; beat-IIIa; beat-IIIc; Ca…
GO:0022610	2.16e-07	34.5367	0.290794	6	247	biological adhesion	6.62401e-06	12	arm; Vinc; boi; egh; rst; kirre; N; ng2; ng3; ng1; ng4; Sgs4; brn; Fas2; RhoGAP5A; Nrg; dlg1; Drak; fw; Ten-a; mew; Flo2; Chc; Gbeta13F; Stim; AnxB11; mbt; if; baz; par-6; CG6788; CG6867; Vav; parvin; crq; ds; CG4629; aop; Sec24CD; ed; ft; bdl; Sgs1; His3.3A; tkv; Arpc4; PDZ-GEF; Tig; DIP-iota; Tsp; nrv2; santa-maria; LanB1; CG7115; pes; CG7227; bib; SCAR; crol; Arpc1; CycE; Gli; beat-Ib; beat-Ic…
GO:0098602	1.36342e-06	65.7455	0.0871203	4	74	single organism cell adhesion	3.13588e-05	12	arm; egh; N; brn; RhoGAP5A; Nrg; dlg1; mew; mbt; if; baz; ds; aop; Sec24CD; ed; ft; bdl; tkv; Tig; LanB1; bib; CadN; CadN2; Itgbn; Src42A; RanBPM; O-fut1; sli; Gbp; POSH; Rab4; shg; Egfr; robo1; p130CAS; rho; alpha-Spec; Rap1; Girdin; LanA; Fhos; LanB2; CG32087; mop; aos; Cad74A; Mkp3; kug; Psn; Sec23; pyd; RhoL; Timp; Cad86C; Cad87A; Lkb1; Cad88C; Cad89D; Fas1; Apc2; Cad96Cb; Cad99C; pygo; Cals;…
GO:0033627	2.30533e-06	158.825	0.0270779	3	23	cell adhesion mediated by integrin	4.2418e-05	12	mew; if; Arpc4; Tig; Tsp; LanB1; SCAR; Arpc1; Itgbn; pgant3; scb; ItgaPS4; ItgaPS5; LanA; rhea; LanB2; Hem; plx; Abi; Sra-1; tx; furrow; Esm
GO:0031589	4.73631e-06	122.115	0.0341417	3	29	cell-substrate adhesion	7.26235e-05	12	Ten-a; mew; if; CG6867; Tig; LanB1; Pax; Itgbn; pgant3; Ndg; muskelin; scb; ItgaPS4; ItgaPS5; Rac1; Fit1; dyl; LanA; Fhos; LanB2; zye; eater; mesh; Ret; jbug; mit; Esm; Jafrac2; CG12061
GO:0035152	9.89403e-05	41.6118	0.0930068	3	79	regulation of tube architecture, open tracheal system	0.00130036	12	DAAM; pck; Fas2; peb; sqh; bou; Nrg; Moe; Zpr1; rtv; dsh; mew; Chc; if; wus; cold; ds; Sec24CD; dpp; bark; ft; mmy; nrv2; uif; crok; Gli; IKKepsilon; vari; Mtp; kune; Syb; stan; garz; Lac; shot; conv; Rho1; grh; fj; sano; cora; shg; Egfr; Mmp1; zip; klar; rho; Blimp-1; rhea; crim; Nrx-IV; Mkp3; verm; serp; knrl; kni; Sec23; CG8121; wkd; cv-c; CG7713; bnl; wat; gammaCOP; awd; Ran; ru; Esm; cathD; …
GO:0071711	0.000134646	150.45	0.0176595	2	15	basement membrane organization	0.00143175	12	PI4KIIIalpha; Crag; hep; Pis; Sec24CD; LanB1; Mmp2; sktl; Mmp1; Mp; LanB2; Sec23; Timp; SPARC; jbug
GO:0007424	0.000140063	19.3284	0.281375	4	239	open tracheal system development	0.00143175	12	DAAM; pck; arm; Raf; N; VhaAC39-1; Fas2; peb; Ptp4E; sqh; Rbcn-3A; bou; Trf2; Nrg; Moe; Zpr1; rtv; dsh; hop; Ptp10D; mew; Chc; if; wus; baz; par-6; Vav; dome; Cdc42; Spp; cold; ds; S; aop; Sec24CD; dpp; Hrs; colt; Mad; Sec5; bark; ed; ft; tkv; vri; Lam; Hsp60C; mmy; nrv2; uif; wg; Btk29A; ppk11; Stam; salm; crok; Sos; elB; noc; esg; Gli; Mhc; spi; Hakai; barr; IKKepsilon; dia; vari; Mtp; kune; Sr…
GO:0060541	0.000177082	18.1469	0.299035	4	254	respiratory system development	0.00148928	12	DAAM; pck; arm; Raf; N; VhaAC39-1; Fas2; peb; Ptp4E; sqh; Rbcn-3A; bou; Trf2; Nrg; Moe; Zpr1; rtv; dsh; hop; Ptp10D; mew; Chc; if; wus; baz; par-6; Wnt5; Vav; dome; Cdc42; Spp; cold; ds; S; aop; Sec24CD; dpp; Hrs; colt; Mad; Sec5; bark; ed; ft; tkv; vri; Lam; Hsp60C; mmy; nrv2; uif; wg; Btk29A; ppk11; Stam; salm; crok; Sos; elB; noc; esg; Gli; Mhc; spi; Hakai; barr; IKKepsilon; dia; vari; Mtp; ku…
GO:0000902	0.000186802	9.99162	0.944196	6	802	cell morphogenesis	0.00148928	12	G9a; Appl; CG3703; CDC45L; CG11398; DAAM; CG11448; rush; arm; usp; ph-p; Vinc; gt; egh; sgg; fs(1)Yb; rst; N; dnc; Mnt; Rala; fd3F; lva; Fas2; peb; Ptp4E; raptor; sqh; pigs; pod1; Nf-YC; xit; nullo; Dok; sn; cyr; CG2116; Smox; Trf2; Nrg; oc; Ppt1; Moe; fend; ZAP3; spri; Dlic; Kap3; dsh; hop; Drak; Ptp10D; bif; Tango10; dy; Rab40; LIMK1; CG1463; CkIalpha; CG12717; hep; Bap60; mew; CG2691; ben; CG1…
GO:0007507	0.000230266	30.9412	0.123617	3	105	heart development	0.00148928	12	arm; sgg; N; pon; CG3226; CHES-1-like; Nrg; dsh; sd; Gbeta13F; wupA; ush; dpp; Mad; slp1; betaggt-I; Cg25C; tkv; H15; mid; nrv2; wg; LanB1; Acer; numb; Sur; Hand; loh; kuz; p38b; Gli; dl; tup; EcR; Ggamma1; Mef2; eve; Galphao; pyr; ths; Lac; fas; mam; scb; sli; Sod2; cora; Act57B; shg; robo1; twi; apt; yki; betaTub60D; Tina-1; Fit1; LanA; sfl; sgl; qm; lqf; Doc3; Doc2; Doc1; simj; Nrx-IV; Fit2; C…
GO:0072358	0.000230266	30.9412	0.123617	3	105	cardiovascular system development	0.00148928	12	arm; sgg; N; pon; CG3226; CHES-1-like; Nrg; dsh; sd; Gbeta13F; wupA; ush; dpp; Mad; slp1; betaggt-I; Cg25C; tkv; H15; mid; nrv2; wg; LanB1; Acer; numb; Sur; Hand; loh; kuz; p38b; Gli; dl; tup; EcR; Ggamma1; Mef2; eve; Galphao; pyr; ths; Lac; fas; mam; scb; sli; Sod2; cora; Act57B; shg; robo1; twi; apt; yki; betaTub60D; Tina-1; Fit1; LanA; sfl; sgl; qm; lqf; Doc3; Doc2; Doc1; simj; Nrx-IV; Fit2; C…
GO:0072359	0.000230266	30.9412	0.123617	3	105	circulatory system development	0.00148928	12	arm; sgg; N; pon; CG3226; CHES-1-like; Nrg; dsh; sd; Gbeta13F; wupA; ush; dpp; Mad; slp1; betaggt-I; Cg25C; tkv; H15; mid; nrv2; wg; LanB1; Acer; numb; Sur; Hand; loh; kuz; p38b; Gli; dl; tup; EcR; Ggamma1; Mef2; eve; Galphao; pyr; ths; Lac; fas; mam; scb; sli; Sod2; cora; Act57B; shg; robo1; twi; apt; yki; betaTub60D; Tina-1; Fit1; LanA; sfl; sgl; qm; lqf; Doc3; Doc2; Doc1; simj; Nrx-IV; Fit2; C…
GO:0085029	0.000242818	108.615	0.023546	2	20	extracellular matrix assembly	0.00148928	12	Cp36; Crag; Vm26Ab; Vm26Ac; Vm26Aa; psd; LanB1; loh; Vm32E; Vm34Ca; LanB2; polybromo; SPARC; Cad99C; mbd; gat; Muc26B; Fs(2)Vaj; snoRNA:Me28S-A2113; snoRNA:Psi18S-1389b
GO:0000904	0.000275717	11.4605	0.632211	5	537	cell morphogenesis involved in differentiation	0.00158538	12	G9a; CG11398; DAAM; usp; ph-p; gt; egh; sgg; fs(1)Yb; rst; N; dnc; fd3F; lva; Fas2; peb; Ptp4E; raptor; sqh; pigs; pod1; Nf-YC; xit; cyr; CG2116; Smox; Nrg; oc; Ppt1; Moe; fend; spri; Dlic; dsh; hop; Ptp10D; bif; Tango10; LIMK1; CG12717; hep; Bap60; mew; ben; CG11584; NetA; NetB; rut; Efhc1.1; if; Nprl2; baz; RhoGAPp190; beta-Spec; Sh; CG6867; upd1; Wnt5; wgn; Ulp1; rictor; Vav; Cdc42; fd19B; run…
GO:0072499	0.000322672	93.0769	0.0270779	2	23	photoreceptor cell axon guidance	0.00174623	12	Fas2; Nrg; Moe; NetA; NetB; beta-Spec; wgn; Vav; Elp3; eya; chif; Cam; Nrk; Lis-1; hts; robo1; caps; dysc; gogo; Abi; Ggamma30A; aor; Rpb7
GO:0009887	0.000400545	8.59534	1.08547	6	922	organ morphogenesis	0.00202073	12	ewg; ac; sc; pcl; ase; svr; CG13366; sdk; CG11382; trr; arm; pn; Raf; boi; sgg; rst; kirre; N; Myc; Rala; ec; Fas2; norpA; bi; peb; ctp; ovo; RhoGAP5A; GAA1; CG5966; rux; sqh; dx; Atx-1; brk; Dok; sn; fs(1)h; Smox; Nrg; oc; Lim1; Moe; lz; btd; Sp1; CG15312; CG15309; sev; dsh; hop; dlg1; Drak; bif; dy; Karl; pot; fw; Mks1; CG43921; LIMK1; Smr; ade5; CG12717; hep; sno; mew; up; BthD; NFAT; l(1)G000…
GO:0032989	0.000417325	8.5251	1.09371	6	929	cellular component morphogenesis	0.00202073	12	G9a; Appl; CG13366; tw; Rbf; CG3703; CDC45L; CG11398; DAAM; CG11448; rush; Scgdelta; arm; mip130; usp; Actn; ph-p; Vinc; gt; egh; sgg; fs(1)Yb; rst; N; dnc; Mnt; Rala; fd3F; lva; Fas2; CG15571; Femcoat; Muc4B; peb; Ptp4E; spoon; raptor; sqh; Marf; pigs; Cdc7; Mcm6; C3G; pod1; Nf-YC; xit; nullo; Dok; dec-1; sn; cyr; CG2116; Smox; Trf2; Cp36; Cp38; Nrg; oc; Ppt1; Moe; fend; ZAP3; spri; Dlic; Kap3; …
GO:0007420	0.000492736	23.6711	0.160113	3	136	brain development	0.00226351	12	CG13377; Appl; vnd; CG3638; DAAM; usp; PsGEF; cib; Fas2; Act5C; sws; Smox; Nrg; oc; CkIIbeta; Ten-a; exd; vap; disco; eas; mbt; CG32572; RhoGAPp190; mnb; Tao; mbm; robo3; chinmo; CG17221; ed; chic; wg; Sema-1a; PrBP; ab; bun; noc; wor; dac; brat; bsh; EcR; Dscam1; drosha; babo; unpg; Uba1; Hr46; stan; en; MCPH1; shot; Hr51; Lis-1; CG8963; robl; CG4853; Sema-5c; Mgat1; Rx; shg; Egfr; Fmr1; robo1; …
GO:0035239	0.00051667	9.93115	0.72404	5	615	tube morphogenesis	0.00226351	12	ewg; ac; l(1)sc; pcl; ase; svr; CG13366; CG11382; arm; crn; Raf; boi; sgg; N; Myc; VhaAC39-1; Fas2; bi; ctp; ovo; RhoGAP5A; Act5C; CG5966; rux; sqh; dx; Atx-1; Inx2; brk; Dok; sn; fs(1)h; Smox; Nrg; oc; Lim1; Moe; Zpr1; btd; Sp1; CG15312; CG15309; dsh; hop; dlg1; Drak; bif; dy; Karl; pot; fw; LIMK1; Smr; ade5; CG12717; hep; sno; mew; NFAT; l(1)G0007; Lsd-2; sog; sd; tay; Stim; SMC3; mthl1; CG3257…
GO:0035011	0.000552157	69.7692	0.035319	2	30	melanotic encapsulation of foreign target	0.00230902	12	Nrg; Flo2; Vav; Cdc42; Zir; Cdk5alpha; dia; Itgbn; Eb1; PPO2; Cdk5; RhoGEF3; Rac1; Dhc64C; LanA; Rac2; DCTN1-p150; DCX-EMAP; Exn; RhoBTB; Als2; RhoL; poly; Ephrin; Eph; jbug; Ubc7; fap; onecut; l(2)k06107
GO:0048589	0.000640703	12.7831	0.419119	4	356	developmental growth	0.00256281	12	ewg; SkpA; RpL22; DAAM; Ns3; arm; Hr4; usp; Ilp6; Raf; gt; PI4KIIIalpha; sgg; N; dnc; Myc; Fas2; bi; CG3527; raptor; sqh; Dok; Nrg; Caf1-180; Rbm13; CG7246; Dsor1; Erk7; spri; sesB; Imp; dsh; dlg1; Drak; bif; cac; Ten-a; LIMK1; hep; lic; jub; ben; rut; eag; hiw; Efhc1.1; CG8939; caz; Arp2; baz; mnb; Sh; upd2; Wnt5; rictor; Tao; Mer; Cdc42; Alr; amn; pico; Rab10; kis; Pi3K21B; al; ebi; ex; dbe; PN…
GO:0003007	0.000752686	59.1748	0.0412056	2	35	heart morphogenesis	0.0028853	12	arm; Nrg; dsh; sd; Gbeta13F; slp1; nrv2; wg; LanB1; Acer; kuz; p38b; Gli; Ggamma1; eve; Galphao; Lac; mam; sli; Sod2; cora; shg; robo1; yki; Nrx-IV; Cat; Cont; hh; p38a; ci; prc; mdl; l(3)06664; CG31029; vtd
GO:0060322	0.000835334	19.6344	0.1919	3	163	head development	0.00307403	12	CG13377; Appl; vnd; CG3638; DAAM; usp; PsGEF; gt; cib; Fas2; dhd; Act5C; sws; Smox; Nrg; oc; btd; CkIIbeta; Ten-a; exd; vap; disco; eas; mbt; CG32572; RhoGAPp190; mnb; Tao; fd19B; mbm; robo3; chinmo; dpp; CG17221; slp1; slp2; ed; chic; wg; Sema-1a; PrBP; gcm; ab; bun; noc; wor; dac; brat; bsh; tsh; EcR; jing; Dscam1; drosha; babo; unpg; Uba1; eve; Hr46; stan; en; MCPH1; shot; Hr51; Lis-1; CG8963;…
GO:0044085	0.000918984	7.26231	1.26678	6	1076	cellular component biogenesis	0.00325179	12	ewg; CG13366; SkpA; tw; Rbf; CG3708; DAAM; Ns3; pck; sta; inc; dor; Scgdelta; arm; mip130; Ocrl; Actn; moody; Nmd3; CG3071; PsGEF; Klp3A; PI4KIIIalpha; sgg; kirre; N; CG2875; Vap-33A; Fas2; CG15571; Femcoat; Muc4B; CG3527; ctp; Bteb2; Mcm3; spoon; GAA1; raptor; sqh; Top3beta; swa; RpL7A; Pat1; Cdc7; CG3198; Mcm6; C3G; bou; nullo; Hira; dec-1; RpS6; sn; Cp36; Cp38; Nrg; Crag; Caf1-180; CG1789; Moe…
GO:0035010	0.000983366	51.3684	0.0470921	2	40	encapsulation of foreign target	0.00326178	12	Nrg; alpha-Man-Ia; hop; Flo2; Vav; Cdc42; Zir; Ostgamma; Cdk5alpha; TM9SF4; dia; Itgbn; Eb1; PPO2; Cdk5; OstDelta; Mgat1; RhoGEF3; Rac1; Dhc64C; LanA; Rac2; DCTN1-p150; DCX-EMAP; Exn; RhoBTB; Als2; alpha-Man-IIa; RhoL; poly; alpha-Man-IIb; alpha-Man-Ib; Ephrin; Eph; jbug; Ubc7; fap; onecut; l(2)k06107; mthl11
GO:0045087	0.000992717	18.4647	0.203673	3	173	innate immune response	0.00326178	12	Dredd; CG32795; Rala; Ubr3; Traf6; Nrg; spirit; Crag; PGRP-SA; hep; Flo2; PGRP-LE; spheroide; upd1; betaCOP; Hayan; psh; Vav; dome; Cdc42; Usp2; Zir; GlyP; Sec5; CG14040; CG13994; eya; smt3; LanB1; Spn28Dc; Tg; Pvr; Etl1; CYLD; Cdk5alpha; RluA-2; aub; Mt2; Prosalpha6T; Tehao; p38b; cact; Dif; dl; fon; dia; Itgbn; Eb1; ubl; sax; PGRP-SC1a; PGRP-SC1b; PGRP-SC2; Sec31; PPO2; Su(var)2-10; Myd88; wun;…
GO:0030198	0.00108401	48.7923	0.0494467	2	42	extracellular matrix organization	0.00343893	12	PI4KIIIalpha; Cp36; Crag; hep; Pis; Chc; wus; obst-A; Sec24CD; Vm26Ab; Vm26Ac; Vm26Aa; psd; mmy; LanB1; loh; Vm32E; Vm34Ca; pgant3; Mmp2; sktl; Mmp1; Pxn; Mp; LanB2; Sec23; Timp; AdamTS-A; polybromo; CG5455; SPARC; Cad99C; gammaCOP; Ppn; jbug; slm; mbd; gat; Muc26B; Fs(2)Vaj; snoRNA:Me28S-A2113; snoRNA:Psi18S-1389b
GO:0035006	0.00135637	43.3538	0.0553332	2	47	melanization defense response	0.00415955	12	Nrg; hep; Flo2; Hayan; Vav; Cdc42; Zir; Spn28Dc; Cdk5alpha; dl; dia; Itgbn; Eb1; PPO2; egr; Cdk5; Rho1; Dark; PPO1; RhoGEF3; Rac1; Dhc64C; LanA; Rac2; PGRP-LC; Dronc; DCTN1-p150; DCX-EMAP; Exn; grim; Spn77Ba; RhoBTB; Als2; MP1; Sp7; RhoL; poly; Tl; Ephrin; Eph; jbug; Ubc7; fap; c; onecut; l(2)k06107; Gr22e
GO:0035151	0.00147357	41.5025	0.0576878	2	49	regulation of tube size, open tracheal system	0.00437318	12	pck; Fas2; sqh; Nrg; rtv; dsh; Chc; wus; cold; ds; Sec24CD; dpp; bark; ft; mmy; nrv2; crok; Gli; vari; kune; stan; garz; Lac; conv; Rho1; grh; fj; sano; cora; Mmp1; zip; crim; Nrx-IV; verm; serp; knrl; kni; CG8121; CG7713; gammaCOP; Ran; cathD; gg; stout; l(3)06664; l(1)1Ac; l(2)Ta; Src64B; Dsp1
GO:0040007	0.00152426	10.0355	0.528608	4	449	growth	0.00438224	12	ewg; SkpA; RpL22; DAAM; Ns3; arm; Hr4; usp; Ilp6; Raf; gt; PI4KIIIalpha; sgg; N; dnc; Myc; Mnt; Fas2; bi; CG3527; raptor; sqh; brk; Dok; Nrg; Caf1-180; Hexo2; Rbm13; CG7246; Dsor1; Erk7; spri; sesB; Imp; dsh; dlg1; Drak; bif; cac; Ten-a; LIMK1; hep; lic; jub; ben; rut; eag; hiw; Efhc1.1; Chc; CycD; CG8939; vap; caz; sl; Arp2; baz; mnb; Vps4; Sh; upd2; Wnt5; CG7423; rictor; Tao; Mer; Cdc42; Alr; a…
GO:0035150	0.001722	38.2353	0.062397	2	53	regulation of tube size	0.00480071	12	pck; Fas2; sqh; Nrg; rtv; dsh; Chc; wus; cold; ds; Sec24CD; dpp; bark; ft; mmy; nrv2; crok; Gli; vari; kune; EcR; stan; garz; Lac; conv; Rho1; grh; fj; sano; cora; Mmp1; zip; crim; Nrx-IV; verm; serp; knrl; kni; CG8121; CG7713; tnc; gammaCOP; Ran; rex; ru; cathD; gg; stout; l(3)06664; l(1)1Ac; l(2)Ta; Src64B; Dsp1
GO:0050808	0.00198203	14.4113	0.259006	3	220	synapse organization	0.00536315	12	ewg; Appl; SkpA; PI4KIIIalpha; sgg; Vap-33A; Tip60; Fas2; CG6048; raptor; Top3beta; pod1; nonC; Upf2; Nrg; sesB; Imp; dlg1; Gs2; cac; Ten-a; LIMK1; Neto; ben; rut; hiw; Efhc1.1; ND-20; caz; Arp2; baz; beta-Spec; par-6; mnb; Frq1; Frq2; CrebB; CCKLR-17D1; rictor; Cdc42; S6kII; kis; cpb; Got2; Mad; Thor; Elp3; Mon1; tkv; GluRIIA; bchs; stai; Nlg2; wg; Sema-1a; Nos; spict; p38b; Gli; brat; Lar; RtGE…
GO:0048638	0.00206022	14.2114	0.262538	3	223	regulation of developmental growth	0.00541544	12	ewg; SkpA; RpL22; Ns3; Hr4; usp; Ilp6; Raf; gt; PI4KIIIalpha; sgg; Myc; Fas2; CG3527; raptor; Rbm13; CG7246; Dsor1; Erk7; dsh; dlg1; Drak; bif; cac; lic; jub; hiw; CG8939; caz; Arp2; baz; beta-Spec; mnb; upd2; Wnt5; Tao; Mer; Cdc42; pico; kis; Pi3K21B; ebi; ex; dbe; cpb; dpp; Mad; ed; ft; tkv; d; Nos; PICK1; spict; kuz; p38b; CadN; brat; Lar; sNPF; RtGEF; Itgbn; Cul2; step; Src42A; Tbce; Mob4; to…
GO:0043062	0.00212942	34.1943	0.0694608	2	59	extracellular structure organization	0.00544186	12	PI4KIIIalpha; Cp36; Crag; hep; Pis; Chc; rngo; wus; obst-A; Sec24CD; Hsp60C; Vm26Ab; Vm26Ac; Vm26Aa; psd; mmy; LanB1; Btk29A; Pen; loh; Vm32E; Vm34Ca; kel; pgant3; scra; Mmp2; pcs; hts; sktl; Mmp1; Pxn; Dhc64C; Mp; LanB2; polo; Sec23; Timp; AdamTS-A; cher; Cortactin; polybromo; CG5455; SPARC; Cad99C; cindr; gammaCOP; Ppn; jbug; hdp-b; prd1; slm; mbd; gat; Su(Gl)27; l(3)85Ai; Muc26B; Fs(2)Vaj; sno…
GO:0035295	0.00220904	7.04804	0.998352	5	848	tube development	0.00549276	12	G9a; ewg; ac; sc; l(1)sc; pcl; ase; svr; CG13366; CG11382; arm; crn; Raf; boi; sgg; N; Myc; VhaAC39-1; Fas2; bi; CHOp24; peb; pon; ctp; ovo; RhoGAP5A; Act5C; CG5966; rux; sqh; dx; Nf-YC; Atx-1; Inx2; brk; Dok; CHES-1-like; sn; fs(1)h; Smox; Nrg; Caf1-180; oc; Lim1; Moe; Bx42; Zpr1; lz; btd; Sp1; Idgf4; CG15312; CG15309; sisA; dsh; hop; dlg1; Drak; bif; Amun; dy; Karl; pot; fw; LIMK1; Smr; ade5; C…
GO:0006582	0.00234865	32.4769	0.0729927	2	62	melanin metabolic process	0.0055404	12	y; Nrg; hep; Flo2; Hayan; Vav; Cdc42; Zir; Spn28Dc; Cdk5alpha; yellow-c; yellow-b; dl; dia; Itgbn; Eb1; PPO2; egr; Cdk5; Rho1; Dark; PPO1; yellow-d; yellow-d2; RhoGEF3; Rac1; yellow-g; yellow-g2; Dhc64C; LanA; Rac2; PGRP-LC; Dronc; DCTN1-p150; DCX-EMAP; yellow-k; Exn; grim; Spn77Ba; RhoBTB; Als2; MP1; Sp7; RhoL; yellow-f; yellow-f2; poly; yellow-e3; yellow-e2; yellow-e; e; Tl; yellow-h; Ephrin; E…
GO:0008045	0.00234865	32.4769	0.0729927	2	62	motor neuron axon guidance	0.0055404	12	N; Fas2; Ptp4E; Nrg; fend; dsh; Ptp10D; NetA; NetB; CG6867; Cdc42; haf; Wnt4; Sema-1a; Glt; Cdk5alpha; beat-Ia; EndoGI; beat-IIIc; Oli; tup; Lim3; Lar; Mmp2; eve; fra; Drl-2; conv; unc-5; Cdk5; Rho1; Ptp52F; Sdc; robo1; Rac1; spz5; NT1; vvl; Mp; dally; Ptp69D; trn; caps; Dab; fz2; ko; Ten-m; grn; cher; tok; spz; side; Ptp99A; zfh1; PlexB; PlexA; scg; l(3)87Ae; sens; aor; RecQ4; CG42456
GO:0007411	0.00318685	12.1294	0.306098	3	260	axon guidance	0.00711063	12	DAAM; gt; egh; N; Fas2; Ptp4E; raptor; pod1; Nf-YC; Smox; Nrg; Ppt1; Moe; fend; dsh; Ptp10D; bif; hep; mew; NetA; NetB; if; beta-Spec; CG6867; Wnt5; wgn; Vav; Cdc42; fd19B; run; fog; kis; dock; robo3; haf; daw; slp1; slp2; Elp3; mid; chic; Tig; eya; Hrb27C; Wnt4; Sema-1a; Glt; gcm; Cdk5alpha; Trim9; SCAR; ab; Rab6; kuz; Sos; beat-Ib; beat-Ic; beat-Ia; EndoGI; chif; dac; beat-IIIc; Oli; CadN; CadN…
GO:0048598	0.00339901	11.847	0.313162	3	266	embryonic morphogenesis	0.00711063	12	ac; l(1)sc; ase; arm; crn; Raf; egh; N; Rala; brn; peb; sqh; xit; Inx2; nullo; Dok; Traf6; ric8a; btd; Myo10A; dsh; hop; dlg1; PhKgamma; SelG; hep; sog; mthl1; baz; par-6; upd1; Pvf1; Vav; pcm; Cdc42; run; Npc1b; fliI; fog; l(2)gl; cbt; ush; lwr; S; aop; Rab5; dpp; Drp1; Mad; odd; bowl; slp1; ed; Traf4; pog; vkg; Cg25C; tkv; chic; PDZ-GEF; mmy; Sec61alpha; eya; Rab30; wg; LanB1; Cka; Pvr; Btk29A;…
GO:0007173	0.00350624	26.3035	0.0894749	2	76	epidermal growth factor receptor signaling pathway	0.00711063	12	Raf; Fas2; CG4096; Nrg; tay; sl; Vps4; dod; ebi; aru; S; ast; Hrs; fred; ed; rau; grk; holn1; Stam; kek1; cni; Socs36E; spi; Src42A; Bap170; geminin; Socs44A; Vps25; tsu; shrb; drk; Rho1; edl; hppy; Fak; mago; Egfr; Vps20; rno; Ptpmeg; Ptp61F; rho; stet; sty; vn; Cbl; mop; brm; aos; Chmp1; ato; pum; cv-c; osa; Pi3K92E; lsn; pnt; E(spl)m8-HLH; Vps2; Ubc7; wit; oho48E; NiPp1; s; l(1)m-C; cv-2; RpL1…
GO:0018958	0.00350624	26.3035	0.0894749	2	76	phenol-containing compound metabolic process	0.00711063	12	y; Torsin; Tbh; Nrg; t; hep; Flo2; Hayan; Vav; Cdc42; Zir; Spn28Dc; Cdk5alpha; yellow-c; yellow-b; dl; amd; Ddc; dia; Itgbn; Eb1; PPO2; egr; 14-3-3zeta; Cdk5; Rho1; Dark; PPO1; yellow-d; yellow-d2; Dat; RhoGEF3; Trh; Rac1; yellow-g; yellow-g2; Dhc64C; LanA; ple; Rac2; PGRP-LC; Dronc; DCTN1-p150; DCX-EMAP; yellow-k; Exn; grim; Dysb; Spn77Ba; RhoBTB; Als2; MP1; Sp7; RhoL; yellow-f; yellow-f2; poly;…
GO:0038127	0.00350624	26.3035	0.0894749	2	76	ERBB signaling pathway	0.00711063	12	Raf; Fas2; CG4096; Nrg; tay; sl; Vps4; dod; ebi; aru; S; ast; Hrs; fred; ed; rau; grk; holn1; Stam; kek1; cni; Socs36E; spi; Src42A; Bap170; geminin; Socs44A; Vps25; tsu; shrb; drk; Rho1; edl; hppy; Fak; mago; Egfr; Vps20; rno; Ptpmeg; Ptp61F; rho; stet; sty; vn; Cbl; mop; brm; aos; Chmp1; ato; pum; cv-c; osa; Pi3K92E; lsn; pnt; E(spl)m8-HLH; Vps2; Ubc7; wit; oho48E; NiPp1; s; l(1)m-C; cv-2; RpL1…
GO:0097485	0.00350829	11.7105	0.316694	3	269	neuron projection guidance	0.00711063	12	DAAM; gt; egh; N; Fas2; Ptp4E; raptor; pod1; Nf-YC; Smox; Nrg; Ppt1; Moe; fend; dsh; Ptp10D; bif; hep; mew; NetA; NetB; if; beta-Spec; CG6867; Wnt5; wgn; Vav; Cdc42; fd19B; run; fog; kis; dock; robo3; haf; daw; slp1; slp2; Elp3; mid; chic; Tig; eya; Hrb27C; Wnt4; Sema-1a; Glt; gcm; Cdk5alpha; Trim9; SCAR; ab; Rab6; kuz; Sos; beat-Ib; beat-Ic; beat-Ia; EndoGI; chif; dac; beat-IIIc; Oli; CadN; CadN…
GO:0048731	0.00375087	4.6864	2.94679	8	2503	system development	0.00711063	12	G9a; CG13377; ewg; ac; sc; l(1)sc; pcl; ase; CG18273; svr; elav; Appl; vnd; CG13366; Dredd; Roc1a; SkpA; sdk; tw; MED22; CG3703; CDC45L; CG11382; CG11398; CG3638; DAAM; CG11417; CG11448; pck; rush; trr; arm; usp; moody; CG4061; CG16903; Unc-76; ph-p; pn; Nmd3; Vinc; kz; crn; temp; Raf; PsGEF; gt; boi; egh; PI4KIIIalpha; sgg; rst; kirre; N; dnc; Myc; CG2875; Mnt; Rala; fd3F; CG2901; ec; VhaAC39-1;…
GO:0016319	0.00387707	24.9467	0.0941841	2	80	mushroom body development	0.00711063	12	CG13377; Appl; CG3638; DAAM; usp; PsGEF; Fas2; Act5C; Smox; Nrg; CkIIbeta; vap; eas; mbt; CG32572; RhoGAPp190; Tao; mbm; robo3; chinmo; CG17221; ed; PrBP; ab; bun; dac; EcR; Dscam1; drosha; babo; Uba1; Hr46; stan; MCPH1; shot; Hr51; Lis-1; robl; CG4853; Mgat1; Fmr1; tsr; enok; Dll; Ptpmeg; ecd; Dhc64C; sgl; S-Lap1; CG6083; CG12301; ftz-f1; Itp-r83A; twf; pxb; SMC1; ssh; tll; pasha; dati; Ephrin; …
GO:0007126	0.00388816	11.2772	0.328467	3	279	meiotic nuclear division	0.00711063	12	mus81; mei-38; wapl; Klp3A; sgg; ng4; mei-9; dhd; rux; hdm; His3.3B; Klp10A; nod; bif; wisp; mamo; Grip128; mei-41; Pp2B-14D; Axs; Fim; corolla; Grip84; Mer; r-cup; lwr; c-cup; mio; sau; Rab5; oaf; okr; Cog3; HP6; Taf12L; His3.3A; Cap-D3; tomb; ifc; cup; cort; mtsh; aust; Cks30A; pelo; Cdk1; Grip75; w-cup; spel1; Gli; twe; c(2)M; Syx5; fzy; grp; fws; Grip71; gammaTub37C; RanGAP; Top2; neb; nesd; …
GO:0060562	0.00393061	7.64265	0.68519	4	582	epithelial tube morphogenesis	0.00711063	12	ewg; ac; l(1)sc; pcl; ase; svr; CG13366; CG11382; arm; crn; Raf; boi; sgg; N; Myc; VhaAC39-1; Fas2; bi; ctp; ovo; RhoGAP5A; CG5966; rux; sqh; dx; Atx-1; brk; Dok; sn; fs(1)h; Smox; Nrg; oc; Lim1; Moe; Zpr1; btd; Sp1; CG15312; CG15309; dsh; hop; dlg1; Drak; bif; dy; Karl; pot; fw; LIMK1; Smr; ade5; CG12717; hep; sno; mew; NFAT; l(1)G0007; Lsd-2; sog; sd; tay; Stim; SMC3; mthl1; CG32572; if; RhoGAP…
GO:0006935	0.00396705	11.1942	0.330822	3	281	chemotaxis	0.00711063	12	DAAM; gt; egh; N; Fas2; Ptp4E; raptor; pod1; Nf-YC; Smox; Nrg; Ppt1; Moe; fend; dsh; Ptp10D; bif; Ten-a; hep; mew; NetA; NetB; if; beta-Spec; CG6867; Wnt5; wgn; Vav; Cdc42; fd19B; run; fog; kis; dock; robo3; haf; dpp; daw; Mad; slp1; slp2; Elp3; mid; chic; Tig; eya; Hrb27C; Wnt4; Sema-1a; Glt; gcm; Cdk5alpha; Trim9; SCAR; ab; Rab6; kuz; Sos; beat-Ib; beat-Ic; beat-Ia; EndoGI; chif; dac; beat-IIIc…
GO:0060560	0.00406907	24.3192	0.0965387	2	82	developmental growth involved in morphogenesis	0.00711063	12	DAAM; arm; dnc; sqh; Dok; Nrg; spri; dsh; bif; hep; rut; baz; Sh; Wnt5; al; Rab5; tkv; wg; tai; SCAR; kuz; CadN; CadN2; Lar; vari; mle; Dscam1; Vang; Wnt2; stan; shot; scb; Hr51; Rho1; RhoGEF2; 18w; CG13531; fd59A; Mmp1; Ptpmeg; Rac1; Strip; LanA; Rac2; Ank2; path; DCTN1-p150; btl; Toll-6; fz2; wnd; verm; alphaSnap; cno; FER; Timp; Abi; Dad; Rab11; C15; Mtl; hdc; pygo; RhoGAP100F; Rok; Plap; Rgl;…
GO:0007417	0.00416858	10.992	0.336708	3	286	central nervous system development	0.00711063	12	CG13377; ewg; ac; sc; l(1)sc; ase; elav; Appl; vnd; CG3638; DAAM; usp; moody; ph-p; crn; PsGEF; N; cib; Fas2; Ptp4E; Rnp4F; Act5C; sws; Smox; Nrg; oc; Ptp10D; CkIIbeta; Ten-a; CG12717; exd; vap; disco; eas; mbt; CG32572; if; RhoGAPp190; mnb; Ulp1; Vav; Tao; run; Npc1b; mbm; robo3; chinmo; CG17221; Mad; gkt; ed; mid; Lam; chic; mmy; eya; smt3; wg; Pvr; Sema-1a; PrBP; C1GalTA; numb; Ror; ab; Ced-12…
GO:1903046	0.00416858	10.992	0.336708	3	286	meiotic cell cycle process	0.00711063	12	mus81; mei-38; wapl; Klp3A; sgg; ng4; mei-9; dhd; rux; hdm; His3.3B; Klp10A; nod; bif; wisp; mamo; Grip128; mei-41; Pp2B-14D; Axs; Fim; corolla; Grip84; Mer; r-cup; lwr; c-cup; mio; sau; Rab5; oaf; okr; Cog3; HP6; Taf12L; His3.3A; Cap-D3; tomb; ifc; cup; cort; mtsh; aust; Cks30A; pelo; Cdk1; Grip75; w-cup; spel1; Gli; twe; c(2)M; Syx5; fzy; grp; fws; Grip71; gammaTub37C; RanGAP; Top2; neb; nesd; …
GO:0009653	0.0042244	4.80915	2.31457	7	1966	anatomical structure morphogenesis	0.00711063	12	G9a; ewg; ac; sc; l(1)sc; pcl; ase; svr; Appl; CG13366; Dredd; sdk; tw; Rbf; CG3703; CDC45L; CG11382; CG11398; DAAM; CG11448; rush; Scgdelta; Pgam5; trr; arm; mip130; Hr4; usp; Actn; ph-p; pn; Vinc; crn; Raf; gt; boi; egh; PI4KIIIalpha; sgg; fs(1)Yb; rst; kirre; N; dnc; Myc; Mnt; Rala; fd3F; ec; VhaAC39-1; lva; brn; cib; Fas2; CG15571; Femcoat; Muc4B; norpA; bi; peb; ctp; Ptp4E; ovo; spoon; RhoGA…
GO:0051321	0.00425092	10.9132	0.339063	3	288	meiotic cell cycle	0.00711063	12	mus81; mei-38; wapl; Klp3A; sgg; ng4; mei-9; dhd; rux; hdm; His3.3B; Klp10A; nod; bif; wisp; mamo; Grip128; mei-41; Pp2B-14D; Axs; Fim; corolla; Grip84; Mer; r-cup; lwr; c-cup; mio; sau; Rab5; oaf; okr; Cog3; HP6; Taf12L; His3.3A; Cap-D3; tomb; ifc; cup; cort; mtsh; aust; Cks30A; pelo; Cdk1; Grip75; w-cup; spel1; Gli; twe; c(2)M; Syx5; fzy; grp; fws; Grip71; gammaTub37C; RanGAP; Top2; neb; nesd; …
GO:0022607	0.00443173	5.93377	1.17024	5	994	cellular component assembly	0.00728071	12	ewg; CG13366; SkpA; tw; Rbf; CG3708; DAAM; pck; sta; inc; dor; Scgdelta; arm; mip130; Ocrl; Actn; moody; PsGEF; Klp3A; PI4KIIIalpha; sgg; kirre; N; Vap-33A; Fas2; CG15571; Femcoat; Muc4B; ctp; Bteb2; Mcm3; spoon; raptor; sqh; Top3beta; swa; Pat1; Cdc7; CG3198; Mcm6; C3G; bou; nullo; Hira; dec-1; sn; Cp36; Cp38; Nrg; Crag; Caf1-180; Moe; HP1b; CG7033; AP-1gamma; fh; Hk; sesB; Imp; Myo10A; Klp10A; …
GO:0040008	0.00459027	10.6084	0.348481	3	296	regulation of growth	0.00733931	12	ewg; SkpA; RpL22; Ns3; Hr4; usp; Ilp6; Raf; gt; PI4KIIIalpha; sgg; N; Myc; Mnt; Fas2; CG3527; raptor; brk; Hexo2; Rbm13; CG7246; Dsor1; Erk7; dsh; dlg1; Drak; bif; cac; lic; jub; hiw; Chc; CycD; CG8939; vap; caz; sl; Arp2; baz; beta-Spec; mnb; Vps4; upd2; Wnt5; CG7423; Tao; Mer; Cdc42; pico; wap; l(2)gl; kis; Pi3K21B; ebi; ex; dbe; cpb; dpp; Mad; Thor; ed; ft; tkv; d; Nos; Samuel; bun; PICK1; spi…
GO:0048608	0.00477535	22.3501	0.10478	2	89	reproductive structure development	0.00733931	12	N; fd3F; Fas2; lz; dsh; robo3; aop; Rab5; Cg25C; mid; Lam; PDZ-GEF; eya; Wnt4; Wnt10; LanB1; Pvr; Btk29A; pim; SmB; Myo31DF; salr; salm; Uvrag; tj; scaf; Vps25; ptc; nclb; en; PI31; otk; otk2; sli; inaC; thr; ena; shg; Egfr; dve; robo1; stl; ken; tsr; Dll; bab1; Myo61F; CG7194; foi; SRm160; rpr; fz2; Six4; TfAP-2; ftz; dsx; hyd; abd-A; htl; tin; hh; Hmgcr; tnc; fd96Ca; fd96Cb; zfh1; Crg-1; Bt; Rg…
GO:0061458	0.00477535	22.3501	0.10478	2	89	reproductive system development	0.00733931	12	N; fd3F; Fas2; lz; dsh; robo3; aop; Rab5; Cg25C; mid; Lam; PDZ-GEF; eya; Wnt4; Wnt10; LanB1; Pvr; Btk29A; pim; SmB; Myo31DF; salr; salm; Uvrag; tj; scaf; Vps25; ptc; nclb; en; PI31; otk; otk2; sli; inaC; thr; ena; shg; Egfr; dve; robo1; stl; ken; tsr; Dll; bab1; Myo61F; CG7194; foi; SRm160; rpr; fz2; Six4; TfAP-2; ftz; dsx; hyd; abd-A; htl; tin; hh; Hmgcr; tnc; fd96Ca; fd96Cb; zfh1; Crg-1; Bt; Rg…
GO:0048513	0.00478651	5.09301	1.74123	6	1479	animal organ development	0.00733931	12	G9a; CG13377; ewg; ac; sc; l(1)sc; pcl; ase; svr; Appl; vnd; CG13366; sdk; tw; CG11382; CG3638; DAAM; trr; arm; usp; moody; pn; crn; temp; Raf; PsGEF; gt; boi; sgg; rst; kirre; N; Myc; Rala; fd3F; ec; cib; Fas2; norpA; bi; CHOp24; peb; pon; ctp; ovo; RhoGAP5A; lin-52; GAA1; Act5C; CG5966; rux; raptor; sqh; dx; CG3226; Pink1; C3G; Nf-YC; Atx-1; brk; Dok; CHES-1-like; sws; sn; fs(1)h; Smox; Nrg; Ca…
GO:0006955	0.00517629	10.1471	0.363786	3	309	immune response	0.00780686	12	ac; Dredd; CG4325; CG32795; Rala; norpA; CG16756; RpS6; Ubr3; Traf6; Nrg; spirit; Crag; CG42339; hop; PGRP-SA; wisp; hep; lic; Flo2; PGRP-LE; spheroide; upd1; betaCOP; Hayan; psh; Vav; dome; Cdc42; amn; Ntf-2; Usp2; Zir; kis; smo; crq; ush; lwr; GlyP; Sec5; Thor; Sr-CIV; Sr-CI; pog; CG14040; Lam; CG13994; eya; smt3; Tep2; LanB1; Spn28Dc; Tg; Pvr; Etl1; CYLD; Cdk5alpha; RluA-2; aub; CG6509; Mt2; n…
GO:0022414	0.00538339	4.95933	1.78243	6	1514	reproductive process	0.00783318	12	y; ac; sc; Dredd; Rbf; mus81; png; mei-38; dor; Adar; arm; mip130; usp; ph-p; wapl; Raf; tko; egh; Klp3A; Tsp3A; PI4KIIIalpha; sgg; per; fs(1)Yb; fs(1)Ya; w; N; ng4; dnc; Myc; Rala; fd3F; brn; Fas2; CG15571; Femcoat; Muc4B; mei-9; CHOp24; ctp; ovo; snf; dhd; spoon; SPR; frma; Act5C; rux; raptor; sqh; CG11700; wuho; Rpt4; swa; Pat1; pigs; Cdc7; Mcm6; Pink1; Inx2; Hira; dec-1; hdm; sn; Tbh; Cp7Fb; …
GO:0008582	0.00542269	20.8983	0.111844	2	95	regulation of synaptic growth at neuromuscular junction	0.00783318	12	ewg; SkpA; PI4KIIIalpha; sgg; Fas2; raptor; dlg1; cac; hiw; caz; Arp2; beta-Spec; mnb; Cdc42; kis; cpb; Mad; tkv; spict; brat; Itgbn; Cul2; Src42A; Tbce; Mob4; sax; Galphao; metro; Fsn; stj; scb; Cdk5; Syn2; unc-104; Snx16; stau; ena; Fak; Sdc; Rae1; Fmr1; Liprin-gamma; PIP5K59B; gbb; TBPH; Eps-15; alpha-Spec; Cip4; LanA; Ank2; nmo; Arp3; nwk; simj; Mob2; RhoGAP68F; Abp1; dysc; Rab8; gig; Syn1; s…
GO:0040011	0.00549165	6.92398	0.752296	4	639	locomotion	0.00783318	12	DAAM; dor; usp; crn; Raf; gt; Pdfr; egh; Tsp3A; w; N; Gas8; Rala; brn; Fas2; norpA; Torsin; CG44774; Ptp4E; spoon; raptor; sqh; pod1; iav; Nf-YC; sn; Tbh; Smox; Nrg; Ppt1; Moe; rdgA; fend; Dsor1; Ptpmeg2; spri; sesB; dsh; hop; dlg1; Evi5; Ptp10D; bif; Ten-a; hep; mew; Neto; CG11178; Clic; NetA; NetB; hiw; Scamp; sl; nonA; mthl1; if; baz; beta-Spec; par-6; CG6867; Dhc16F; upd1; Wnt5; wgn; phm; Pvf…
GO:1904396	0.00553431	20.6743	0.113021	2	96	regulation of neuromuscular junction development	0.00783318	12	ewg; SkpA; PI4KIIIalpha; sgg; Fas2; raptor; dlg1; cac; hiw; caz; Arp2; beta-Spec; mnb; Cdc42; S6kII; kis; cpb; Mad; tkv; spict; brat; Itgbn; Cul2; Src42A; Tbce; Mob4; sax; Galphao; metro; Fsn; stj; scb; Cdk5; Syn2; unc-104; Snx16; stau; ena; Fak; Sdc; Rae1; Fmr1; Liprin-gamma; PIP5K59B; gbb; TBPH; Eps-15; alpha-Spec; Cip4; LanA; Ank2; nmo; Arp3; nwk; simj; Mob2; RhoGAP68F; Abp1; dysc; Rab8; gig; …
GO:0007409	0.00595758	9.63043	0.382623	3	325	axonogenesis	0.00814432	12	DAAM; gt; egh; rst; N; dnc; Fas2; Ptp4E; raptor; pod1; Nf-YC; Smox; Nrg; Ppt1; Moe; fend; spri; Dlic; dsh; Ptp10D; bif; LIMK1; CG12717; hep; mew; ben; NetA; NetB; rut; if; RhoGAPp190; beta-Spec; Sh; CG6867; Wnt5; wgn; Ulp1; Vav; Cdc42; fd19B; run; fog; kis; dock; robo3; haf; TBCD; Rab5; daw; slp1; slp2; Elp3; mid; chic; PDZ-GEF; Tig; eya; Hrb27C; smt3; Wnt4; Sema-1a; Glt; tai; gcm; Cdk5alpha; Tri…
GO:0051963	0.00599135	19.8242	0.11773	2	100	regulation of synapse assembly	0.00814432	12	ewg; SkpA; PI4KIIIalpha; sgg; Fas2; raptor; Top3beta; dlg1; cac; hiw; caz; Arp2; beta-Spec; mnb; Cdc42; kis; cpb; Mad; tkv; spict; brat; Itgbn; Cul2; Src42A; Tbce; Mob4; sax; Galphao; stan; metro; Fsn; stj; scb; Cdk5; Syn2; unc-104; Snx16; stau; ena; Fak; Sdc; Rae1; Fmr1; Liprin-gamma; PIP5K59B; gbb; TBPH; Eps-15; Rac1; alpha-Spec; Cip4; LanA; Ank2; nmo; Arp3; nwk; simj; Mob2; RhoGAP68F; Abp1; dy…
GO:0006928	0.00606108	6.7231	0.773487	4	657	movement of cell or subcellular component	0.00814432	12	DAAM; dor; usp; Unc-76; crn; Raf; gt; egh; Klp3A; Tsp3A; N; Gas8; Rala; Vap-33A; brn; Fas2; ctp; CG44774; Ptp4E; spoon; Mlc-c; raptor; sqh; Marf; Pat1; pod1; Nf-YC; xit; sn; CG1571; Smox; Nrg; Ppt1; Moe; fend; fh; Dsor1; Ptpmeg2; spri; Klp10A; Dlic; Kap3; dsh; hop; Evi5; Kmn1; nod; Ptp10D; bif; hep; mew; CG11178; NetA; NetB; Lsd-2; sl; mthl1; if; baz; beta-Spec; par-6; CG6867; Dhc16F; upd1; Wnt5;…
GO:1901605	0.00610824	19.6224	0.118907	2	101	alpha-amino acid metabolic process	0.00814432	12	y; CG17896; CG3011; v; Gs2; CG2543; CG11134; CG7860; P5CDh2; r; Cbs; slgA; Gs1; Got2; KFase; CG9547; CG11236; CG10399; Sps2; CG6415; hgo; CG12264; Ddc; CG8665; cn; 14-3-3zeta; CG12338; GLS; SelD; Got1; Dark; Sardh; CG5493; Pu; Trh; Gad1; Hn; CG8005; CG6638; aay; CG7560; CG10361; CG8745; CG6661; l(3)72Dr; CG9674; CG7430; CG4174; CG32199; Oat; CG4825; ppl; P5CDh1; CG7470; CG12173; Hph; CG1315; GstZ…
GO:0051961	0.00622618	19.4246	0.120085	2	102	negative regulation of nervous system development	0.00818298	12	ewg; SkpA; sdk; MED22; CG4061; sgg; N; Fas2; raptor; bif; hiw; UQCR-14; Hs3st-B; Mer; fd19B; S6kII; l(2)gl; aop; slp1; slp2; ed; Kr-h1; spict; CadN; Socs36E; brat; COX4; Itgbn; Src42A; EcR; Mob4; ana; Galphao; Fsn; stj; scb; unc-104; MED9; ena; CalpA; Fak; hpo; Rae1; Fmr1; Liprin-gamma; TBPH; fd64A; ago; Cip4; HDAC1; LanA; MED4; nwk; Mob2; btl; brm; MED10; aos; MED11; gig; polo; MED31; spartin; M…
GO:0065008	0.00645655	5.39167	1.27737	5	1085	regulation of biological quality	0.00826107	12	ewg; Roc1a; SkpA; Rbf; DAAM; pck; CG14798; Scgdelta; Adar; arm; Rbcn-3B; usp; Actn; CG4199; Vinc; Raf; PsGEF; gt; Pdfr; egh; Seipin; PI4KIIIalpha; sgg; per; Syx4; N; Myc; CG12206; Parg; VhaAC39-1; Vap-33A; Tip60; Fas2; norpA; rb; peb; ovo; TrxT; dhd; SK; spoon; SPR; frma; CG4078; Act5C; CG6048; raptor; sqh; Rbcn-3A; Top3beta; Marf; Ctr1A; shf; Atx-1; bou; cm; nullo; CG9650; Dok; Nek2; sws; Tbh; T…
GO:0007548	0.00646519	19.0407	0.122439	2	104	sex differentiation	0.00826107	12	N; fd3F; Fas2; lz; Yp2; Yp1; dsh; Yp3; robo3; aop; Rab5; dpp; mid; Lam; PDZ-GEF; eya; Wnt4; wg; Wnt10; LanB1; Pvr; Btk29A; pim; SmB; Myo31DF; salr; salm; Uvrag; dac; her; tj; scaf; Vps25; ptc; nclb; en; PI31; otk; otk2; stil; sli; inaC; thr; ena; shg; Egfr; robo1; stl; ken; tsr; Dll; Pdk1; bab1; Myo61F; CG7194; foi; SRm160; tra; hid; rpr; fz2; Six4; TfAP-2; Scr; ftz; dsx; hyd; abd-A; htl; fru; ti…
GO:0061564	0.00664228	9.24701	0.397928	3	338	axon development	0.00835181	12	DAAM; CG4061; gt; egh; rst; N; dnc; Fas2; Ptp4E; raptor; pod1; Nf-YC; Smox; Nrg; Ppt1; Moe; fend; spri; Imp; Dlic; dsh; Ptp10D; bif; LIMK1; CG12717; hep; mew; ben; NetA; NetB; rut; if; RhoGAPp190; beta-Spec; Sh; CG6867; Wnt5; wgn; Ulp1; Vav; Cdc42; fd19B; run; fog; kis; dock; robo3; haf; TBCD; Rab5; daw; slp1; slp2; Elp3; mid; chic; PDZ-GEF; Tig; mmy; eya; Hrb27C; smt3; Wnt4; Sema-1a; Glt; tai; g…
GO:0019748	0.0068315	18.4923	0.125971	2	107	secondary metabolic process	0.00835181	12	y; dor; z; w; rb; ovo; cm; Nrg; v; hep; Flo2; Hayan; phm; Cyp308a1; Vav; car; Cdc42; mal; Zir; Cyp4ac1; Cyp4ac2; Spn28Dc; Cdk5alpha; AstC; yellow-c; yellow-b; dl; dia; Itgbn; Eb1; cn; PPO2; Rab32; egr; dare; Cyp6g1; Cyp6a9; Cyp6a8; Cdk5; Cyp4aa1; Rho1; Vha44; Dark; PPO1; yellow-d; yellow-d2; bw; RhoGEF3; Rac1; ecd; yellow-g; yellow-g2; Dhc64C; LanA; Rac2; PGRP-LC; Dronc; E(z); Est-6; SP; DCTN1-p1…
GO:0050793	0.00684537	6.48198	0.800565	4	680	regulation of developmental process	0.00835181	12	G9a; ewg; y; SkpA; sdk; RpL22; MED22; DAAM; Ns3; Pgam5; arm; Hr4; usp; CG4061; Ilp6; Raf; gt; PI4KIIIalpha; sgg; rst; kirre; N; Myc; Rala; ec; lva; Fas2; norpA; CG3527; ctp; raptor; Top3beta; swa; Marf; Pink1; nullo; Dok; Smox; oc; Ppt1; Rbm13; CG7246; fh; Dsor1; Erk7; lz; Imp; sev; Dlic; dsh; hop; dlg1; Drak; CG1572; Met; bif; SelG; cac; Rab40; Mks1; CG43921; LIMK1; hep; lic; Pdcd4; Yp3; jub; be…
GO:0006544	0.00704443	181.729	0.00706381	1	6	glycine metabolic process	0.00835181	12	CG3011; CG6415; CG7430; ppl; CG3999; Dhfr
GO:0048562	0.00704443	181.729	0.00706381	1	6	embryonic organ morphogenesis	0.00835181	12	LanB1; Rac1; puc; tin; c; drm
GO:0002252	0.00708088	18.1438	0.128326	2	109	immune effector process	0.00835181	12	G9a; ac; Dredd; CG4325; Traf6; Nrg; alpha-Man-Ia; Vago; hop; PGRP-SA; wisp; Flo2; psh; Vav; Cdc42; Ntf-2; Usp2; Zir; crq; ush; pog; r2d2; Ostgamma; me31B; Cdk5alpha; Mt2; vir-1; nub; Tehao; TM9SF4; cact; Dif; dl; CG10333; dia; cad; Itgbn; Eb1; CG12780; PPO2; Myd88; Def; Listericin; Cdk5; Diap2; casp; Dcr-2; OstDelta; Atg7; Tab2; Toll-7; Mgat1; DMAP1; dnr1; key; RhoGEF3; Rac1; Dhc64C; LanA; vvl; R…
GO:0098609	0.00720711	17.9744	0.129503	2	110	cell-cell adhesion	0.00839309	12	arm; egh; rst; kirre; N; brn; Fas2; RhoGAP5A; Nrg; dlg1; fw; mew; mbt; if; baz; ds; aop; Sec24CD; ed; ft; bdl; tkv; bib; beat-Ib; beat-Ic; beat-IIIb; beat-IIIa; beat-IIIc; CadN; CadN2; Fas3; Lectin-galC1; Lar; Itgbn; Src42A; RanBPM; stan; Lac; O-fut1; scb; ItgaPS4; sli; Gbp; POSH; Rab4; shg; Egfr; robo1; ItgaPS5; p130CAS; rho; alpha-Spec; Rap1; Girdin; Con; Dscam2; CG32087; caps; mop; aos; Cad74A…
GO:0042330	0.00737264	8.89224	0.413233	3	351	taxis	0.00847854	12	DAAM; gt; Pdfr; egh; w; N; Fas2; norpA; Ptp4E; raptor; pod1; iav; Nf-YC; Smox; Nrg; Ppt1; Moe; rdgA; fend; dsh; dlg1; Ptp10D; bif; Ten-a; hep; mew; Clic; NetA; NetB; nonA; if; beta-Spec; CG6867; Wnt5; wgn; Vav; Cdc42; Nup205; fd19B; run; slgA; fog; kis; Ptth; dock; robo3; haf; dpp; daw; Mad; tim; slp1; slp2; Elp3; mid; chic; Tig; eya; Hrb27C; Wnt4; santa-maria; Cka; Sema-1a; Glt; gcm; Pen; Cdk5al…
GO:0008360	0.0077223	17.3269	0.134212	2	114	regulation of cell shape	0.00877101	12	arm; Fas2; nullo; Dok; dsh; hop; Drak; Rab40; mei-41; AnxB11; if; par-6; upd1; Vav; Cdc42; fog; l(2)gl; CG4629; Sec24CD; ed; His3.3A; Arpc4; PDZ-GEF; wg; CG7115; Pvr; SCAR; Sos; CycE; CG5790; Lar; Arpc2; Fs(2)Ket; dia; Ggamma1; sqa; Mp20; drk; Rho1; RhoGEF2; grh; ena; Fak; Vrp1; Cdk9; CG7028; Rac1; alpha-Spec; Rap1; Hsp83; dyl; CG10163; RhoGEF4; Rac2; pbl; rhea; CycT; CG7497; CG42674; zye; Pitslr…
GO:0007272	0.00821399	151.429	0.00824111	1	7	ensheathment of neurons	0.00889044	12	crn; Nrg; wrapper; Nrx-IV; Cont; how; bon
GO:0008366	0.00821399	151.429	0.00824111	1	7	axon ensheathment	0.00889044	12	crn; Nrg; wrapper; Nrx-IV; Cont; how; bon
GO:0021675	0.00821399	151.429	0.00824111	1	7	nerve development	0.00889044	12	Nrg; fd59A; Dll; Nrx-IV; Cont; Mical; pros
GO:0035001	0.00821399	151.429	0.00824111	1	7	dorsal trunk growth, open tracheal system	0.00889044	12	vari; scb; Mmp1; LanA; verm; Esm; l(2)Ta
GO:0002009	0.00865566	6.03697	0.855898	4	727	morphogenesis of an epithelium	0.00925954	12	ewg; ac; l(1)sc; pcl; ase; svr; CG13366; CG11382; arm; ph-p; crn; Raf; boi; egh; sgg; N; Myc; Rala; ec; VhaAC39-1; brn; Fas2; bi; peb; ctp; ovo; spoon; RhoGAP5A; CG5966; rux; sqh; dx; Atx-1; Inx2; nullo; brk; Dok; sn; fs(1)h; Smox; Traf6; Nrg; oc; Lim1; Moe; Zpr1; btd; Sp1; CG15312; CG15309; Myo10A; sev; dsh; hop; dlg1; Drak; bif; dy; Karl; pot; fw; Mks1; CG43921; LIMK1; Smr; ade5; CG12717; hep; …
GO:0048729	0.0093384	5.89839	0.874735	4	743	tissue morphogenesis	0.00979071	12	ewg; ac; l(1)sc; pcl; ase; svr; CG13366; CG11382; arm; ph-p; crn; Raf; boi; egh; sgg; N; Myc; Rala; ec; VhaAC39-1; brn; Fas2; bi; peb; ctp; ovo; spoon; RhoGAP5A; CG5966; rux; sqh; dx; Atx-1; Inx2; nullo; brk; Dok; sn; fs(1)h; Smox; Traf6; Nrg; oc; Lim1; Moe; Zpr1; btd; Sp1; CG15312; CG15309; Myo10A; sev; dsh; hop; dlg1; Drak; bif; dy; Karl; pot; fw; Mks1; CG43921; LIMK1; Smr; ade5; CG12717; hep; …
GO:0051124	0.00936503	15.6352	0.14834	2	126	synaptic growth at neuromuscular junction	0.00979071	12	ewg; SkpA; PI4KIIIalpha; sgg; Fas2; raptor; sesB; Imp; dlg1; cac; Ten-a; LIMK1; ben; hiw; Efhc1.1; caz; Arp2; mnb; rictor; Cdc42; kis; cpb; Mad; Elp3; tkv; stai; Nlg2; wg; spict; brat; Lar; Itgbn; Dap160; Cul2; Src42A; Tbce; Mob4; sax; Jra; Galphao; metro; jeb; Fsn; stj; Sin1; scb; Cdk5; Syn2; unc-104; Snx16; stau; ena; Fak; Sdc; Rae1; Fmr1; Liprin-gamma; PIP5K59B; gbb; TBPH; Eps-15; Pdk1; Cip4; …
GO:0050807	0.00950842	15.5089	0.149517	2	127	regulation of synapse organization	0.00982892	12	ewg; SkpA; PI4KIIIalpha; sgg; Tip60; Fas2; CG6048; raptor; Top3beta; dlg1; cac; hiw; ND-20; caz; Arp2; beta-Spec; mnb; Cdc42; S6kII; kis; cpb; Mad; Thor; tkv; bchs; spict; p38b; brat; RtGEF; Itgbn; Cul2; Src42A; Tbce; Mob4; sax; Galphao; stan; metro; Fsn; stj; scb; Cdk5; Syn2; unc-104; Snx16; stau; Nup75; ena; Fak; Act57B; Sdc; Rae1; Fmr1; Liprin-gamma; PIP5K59B; gbb; TBPH; Eps-15; Rac1; alpha-Sp…
GO:0000003	0.00974181	4.32099	2.00965	6	1707	reproduction	0.0098842	12	y; ac; sc; Dredd; Rbf; CG11664; mus81; png; mei-38; dor; Adar; arm; mip130; usp; ph-p; wapl; CG2918; Raf; tko; egh; Klp3A; Tsp3A; PI4KIIIalpha; sgg; per; fs(1)Yb; fs(1)Ya; w; N; ng4; dnc; Myc; Rala; fd3F; brn; Fas2; CG15571; Femcoat; Muc4B; mei-9; CHOp24; ctp; ovo; snf; dhd; spoon; SPR; frma; CG34435; Act5C; rux; raptor; sqh; CG11700; wuho; Rpt4; swa; Pat1; pigs; Cdc7; Mcm6; Pink1; Inx2; Hira; de…
GO:0006952	0.00977677	7.99223	0.45797	3	389	defense response	0.0098842	12	G9a; Dredd; ssx; CG32795; Rala; Vap-33A; tyf; CG3527; CBP; Ubr3; Traf6; Nrg; spirit; Crag; lz; Vago; hop; PGRP-SA; CG2247; hep; CG14411; Flo2; PGRP-LE; Traf-like; spheroide; upd1; betaCOP; Tsf1; Hayan; psh; Ulp1; Vav; et; dome; Cdc42; cactin; Usp2; Zir; crq; Ets21C; Ptth; Npc2a; GlyP; AIF; Sec5; Thor; Sr-CIV; Sr-CI; Traf4; CG14040; TotM; CG9029; CG13994; eya; smt3; santa-maria; Tep2; Tep3; r2d2; …
GO:0048856	0.00998685	3.81875	4.23593	9	3598	anatomical structure development	0.00998685	12	G9a; CG13377; cin; ewg; y; ac; sc; l(1)sc; pcl; ase; CG18273; svr; elav; Appl; vnd; CG13366; Dredd; Roc1a; SkpA; sdk; CG5254; tw; Rbf; MED22; CG3703; CDC45L; CG11382; CG11398; CG3638; DAAM; CG11417; CG11448; pck; rush; dor; a6; Scgdelta; Pgam5; trr; arm; mip130; Hr4; usp; Actn; moody; CG4061; CG16903; Unc-76; ph-p; pn; Nmd3; Vinc; kz; crn; temp; Raf; PsGEF; gt; boi; egh; Tsp3A; PI4KIIIalpha; sgg;…
GO:0006464	7.32852e-06	8.57143	1.96327	10	1137	cellular protein modification process	0.000487347	13	CG3038; G9a; Roc1a; Hmt4-20; SkpA; tw; CG32812; CG11412; png; O-fut2; Pgam5; trr; CG4406; CG4325; Sik2; CG16903; temp; CG2924; Raf; sgg; per; CG2680; CG2681; ttm50; CG12498; N; CG16781; Parg; Rala; ec; brn; Tip60; CG2982; rb; peb; Pp2C1; Ptp4E; Cdk7; Usp16-45; RhoGAP5A; Sirt4; CG15767; GAA1; mof; Usp30; raptor; Btnd; Efr; CG3781; CG11700; PpV; dx; Cdc7; CG3198; Pink1; CG3184; xit; nonC; CG14435; …
GO:0036211	7.32852e-06	8.57143	1.96327	10	1137	protein modification process	0.000487347	13	CG3038; G9a; Roc1a; Hmt4-20; SkpA; tw; CG32812; CG11412; png; O-fut2; Pgam5; trr; CG4406; CG4325; Sik2; CG16903; temp; CG2924; Raf; sgg; per; CG2680; CG2681; ttm50; CG12498; N; CG16781; Parg; Rala; ec; brn; Tip60; CG2982; rb; peb; Pp2C1; Ptp4E; Cdk7; Usp16-45; RhoGAP5A; Sirt4; CG15767; GAA1; mof; Usp30; raptor; Btnd; Efr; CG3781; CG11700; PpV; dx; Cdc7; CG3198; Pink1; CG3184; xit; nonC; CG14435; …
GO:0043412	1.15309e-05	8.10357	2.06514	10	1196	macromolecule modification	0.000511202	13	CG3038; G9a; Roc1a; Hmt4-20; SkpA; tw; CG32812; CG11412; png; O-fut2; Adar; Pgam5; trr; CG4406; CG4325; Sik2; CG4045; CG16903; temp; CG2924; Raf; sgg; per; CG2680; CG2681; ttm50; CG12498; N; CG16781; Parg; Rala; ec; CG6379; brn; Tip60; CG2982; rb; CG3527; peb; Pp2C1; Ptp4E; Cdk7; Usp16-45; RhoGAP5A; Sirt4; CG15767; GAA1; mof; Usp30; raptor; Btnd; Efr; CG3781; CG11700; wuho; PpV; dx; Cdc7; CG3198;…
GO:0007093	2.07861e-05	30.1697	0.167491	4	97	mitotic cell cycle checkpoint	0.000691138	13	SkpA; Rbf; mus81; CDC45L; mei-9; Mcm3; CHES-1-like; Dsor1; RpII215; mei-41; lwr; Bub1; Wee1; Mnn1; alien; me31B; Cdk1; mre11; spel1; grp; CG10336; Tango6; Top2; lok; BubR1; CG15237; Cul1; CSN4; Cul4; CSN7; FANCI; Su(var)2-10; Mad1; Rpb5; Mtor; Rcd1; Lis-1; Topors; CG17249; Rcd5; Myt1; mad2; MED4; mus312; Mcm7; Cdk8; Pop2; mus304; CSN1b; rept; CSN3; Rpb8; Chro; slx1; Hus1-like; Rga; alphaTub84B; g…
GO:0000075	3.29241e-05	26.6963	0.188211	4	109	cell cycle checkpoint	0.00087578	13	SkpA; Rbf; mus81; CDC45L; mei-9; Mcm3; mof; CHES-1-like; Dsor1; RpII215; mei-41; CG9578; lwr; Rad1; Bub1; Wee1; Mnn1; alien; me31B; Cdk1; aurB; mre11; spel1; grp; CG10336; Tango6; Top2; lok; BubR1; CG15237; Cul1; CSN4; Cul4; CSN7; FANCI; Su(var)2-10; Mad1; Rpb5; Mtor; Rcd1; Lis-1; Topors; Brca2; CG17249; armi; Rcd5; RfC4; Myt1; mad2; MED4; mus312; Mcm7; Cdk8; Pop2; mus304; Rad9; CSN1b; rept; CSN3…
GO:0045930	4.34793e-05	24.7906	0.202025	4	117	negative regulation of mitotic cell cycle	0.000963791	13	ase; SkpA; Rbf; mus81; CDC45L; mei-9; Mcm3; CHES-1-like; Dsor1; RpII215; Aven; mei-41; smo; lwr; Mad; Bub1; CG14020; Wee1; Mnn1; alien; me31B; Cdk1; mre11; Sos; spel1; Syx5; grp; CG10336; Tango6; Top2; lok; E2f2; BubR1; CG15237; Cul1; CSN4; Cul4; CSN7; FANCI; Su(var)2-10; Mad1; dap; Rpb5; Mtor; Rcd1; Lis-1; Topors; Xpd; Egfr; CG17249; Rcd5; Myt1; mad2; MED4; mus312; Mcm7; Cdk8; CycA; Pop2; RecQ5;…
GO:0000278	6.8675e-05	8.91016	1.10509	7	640	mitotic cell cycle	0.00119074	13	ac; sc; ase; CG17778; SkpA; RpL22; Rbf; MED22; mus81; CDC45L; png; mei-38; sta; mip130; Ocrl; ph-p; Klp3A; eIF3ga; sgg; fs(1)Ya; ttm50; N; dgt4; mei-9; ctp; Cdk7; Mcm3; RpL35; Act5C; rux; CG5921; sqh; Spx; PpV; RpL7A; APC7; Cdc7; RpL17; CHES-1-like; NELF-B; CG10932; Nek2; RpS6; Smox; Moe; Rbm13; APC4; CG7033; Dsor1; ric8a; PPP4R2r; Hmr; feo; Klp10A; Dlic; dlg1; RpII215; Kmn1; nod; wisp; Aven; Smr…
GO:0051348	7.3492e-05	44.4702	0.082882	3	48	negative regulation of transferase activity	0.00119074	13	sgg; par-6; MKP-4; l(2)gl; Bub1; cort; Rca1; Wee1; Cks30A; kek1; ics; CycE; fzy; BubR1; CG15237; Mad1; Mtor; drk; pcs; CG8060; Fak; PTP-ER; mi; fzr2; Ptp61F; ago; mad2; Cdc27; Cbl; Mkp3; Chro; alphaTub84B; puc; alphaTub85E; eff; CSN5; Mps1; alph; Bub3; CG15528; rod; cof; c; red; E(lz); dbo; CG18508; BG642312
GO:0045786	8.75901e-05	20.5605	0.241739	4	140	negative regulation of cell cycle	0.00119074	13	ase; SkpA; Rbf; mus81; CDC45L; mei-9; Mcm3; pigs; CHES-1-like; Dsor1; RpII215; Aven; mei-41; Mer; smo; ex; lwr; Mad; Bub1; CG14020; cort; Wee1; Mnn1; wg; alien; Cks30A; me31B; Cdk1; mre11; Sos; spel1; esg; Syx5; fzy; grp; CG10336; Tango6; Top2; lok; E2f2; BubR1; CG15237; Cul1; CSN4; Cul4; CSN7; FANCI; Su(var)2-10; Mad1; dap; Rpb5; Mtor; Mos; shot; Rcd1; Lis-1; Topors; Xpd; Egfr; mi; fzr2; Brca2; …
GO:0070647	8.95291e-05	13.5099	0.476572	5	276	protein modification by small protein conjugation or removal	0.00119074	13	Roc1a; SkpA; CG4325; CG2924; CG2681; CG16781; ec; rb; Usp16-45; Usp30; CG3781; CG11700; dx; Pink1; CG14435; Ubr3; UbcE2H; Traf6; CG10761; otu; CG42797; Atg8a; CG1749; Usp7; Uch-L5R; CG2574; CG12717; CG9941; ben; CG5334; CG5347; hiw; CG8184; CG8974; Ubr1; CG8188; ari-1; fu; Usp39; Ulp1; car; SkpD; SkpC; SkpE; HERC2; Usp2; CG11023; lwr; CG5440; CG4238; Su(dx); Uch; Atxn7; Hrs; msl-2; RpL40; Traf4; …
GO:0007094	0.000255773	105.892	0.0241739	2	14	mitotic spindle assembly checkpoint	0.00159041	13	Bub1; BubR1; CG15237; Mad1; Mtor; mad2; Chro; alphaTub84B; alphaTub85E; Mps1; Bub3; rod; E(lz); CG18508
GO:0071173	0.000255773	105.892	0.0241739	2	14	spindle assembly checkpoint	0.00159041	13	Bub1; BubR1; CG15237; Mad1; Mtor; mad2; Chro; alphaTub84B; alphaTub85E; Mps1; Bub3; rod; E(lz); CG18508
GO:0071174	0.000255773	105.892	0.0241739	2	14	mitotic spindle checkpoint	0.00159041	13	Bub1; BubR1; CG15237; Mad1; Mtor; mad2; Chro; alphaTub84B; alphaTub85E; Mps1; Bub3; rod; E(lz); CG18508
GO:1904666	0.000255773	105.892	0.0241739	2	14	regulation of ubiquitin protein ligase activity	0.00159041	13	Bub1; BubR1; CG15237; Mad1; Mtor; mad2; Chro; alphaTub84B; alphaTub85E; Mps1; Bub3; rod; E(lz); CG18508
GO:1904667	0.000255773	105.892	0.0241739	2	14	negative regulation of ubiquitin protein ligase activity	0.00159041	13	Bub1; BubR1; CG15237; Mad1; Mtor; mad2; Chro; alphaTub84B; alphaTub85E; Mps1; Bub3; rod; E(lz); CG18508
GO:1903047	0.00027825	8.28131	0.961777	6	557	mitotic cell cycle process	0.00159041	13	ase; CG17778; SkpA; RpL22; Rbf; MED22; mus81; CDC45L; mei-38; sta; mip130; Ocrl; ph-p; Klp3A; eIF3ga; sgg; fs(1)Ya; ttm50; N; dgt4; mei-9; ctp; Cdk7; Mcm3; RpL35; Act5C; rux; CG5921; sqh; Spx; PpV; RpL7A; APC7; RpL17; CHES-1-like; NELF-B; CG10932; Nek2; RpS6; Moe; Rbm13; APC4; CG7033; Dsor1; ric8a; Hmr; feo; Klp10A; Dlic; dlg1; RpII215; Kmn1; nod; wisp; Aven; REG; Ndc80; jub; shtd; Grip128; mh; T…
GO:0031577	0.000294814	97.7385	0.0259006	2	15	spindle checkpoint	0.00159041	13	Bub1; aurB; BubR1; CG15237; Mad1; Mtor; mad2; Chro; alphaTub84B; alphaTub85E; Mps1; Bub3; rod; E(lz); CG18508
GO:0033048	0.000294814	97.7385	0.0259006	2	15	negative regulation of mitotic sister chromatid segregation	0.00159041	13	Bub1; BubR1; CG15237; Mad1; Mtor; mad2; CycA; Chro; alphaTub84B; alphaTub85E; Mps1; Bub3; rod; E(lz); CG18508
GO:0045841	0.000294814	97.7385	0.0259006	2	15	negative regulation of mitotic metaphase/anaphase transition	0.00159041	13	Bub1; BubR1; CG15237; Mad1; Mtor; mad2; CycA; Chro; alphaTub84B; alphaTub85E; Mps1; Bub3; rod; E(lz); CG18508
GO:1902100	0.000294814	97.7385	0.0259006	2	15	negative regulation of metaphase/anaphase transition of cell cycle	0.00159041	13	Bub1; BubR1; CG15237; Mad1; Mtor; mad2; CycA; Chro; alphaTub84B; alphaTub85E; Mps1; Bub3; rod; E(lz); CG18508
GO:2000816	0.000294814	97.7385	0.0259006	2	15	negative regulation of mitotic sister chromatid separation	0.00159041	13	Bub1; BubR1; CG15237; Mad1; Mtor; mad2; CycA; Chro; alphaTub84B; alphaTub85E; Mps1; Bub3; rod; E(lz); CG18508
GO:0033046	0.000336578	90.75	0.0276273	2	16	negative regulation of sister chromatid segregation	0.00159041	13	Bub1; BubR1; CG15237; Mad1; Mtor; mad2; CycA; Mi-2; Chro; alphaTub84B; alphaTub85E; Mps1; Bub3; rod; E(lz); CG18508
GO:0051352	0.000336578	90.75	0.0276273	2	16	negative regulation of ligase activity	0.00159041	13	Bub1; Rca1; CycE; BubR1; CG15237; Mad1; Mtor; mad2; Chro; alphaTub84B; alphaTub85E; Mps1; Bub3; rod; E(lz); CG18508
GO:0051436	0.000336578	90.75	0.0276273	2	16	negative regulation of ubiquitin-protein ligase activity involved in mitotic cell cycle	0.00159041	13	Bub1; Rca1; CycE; BubR1; CG15237; Mad1; Mtor; mad2; Chro; alphaTub84B; alphaTub85E; Mps1; Bub3; rod; E(lz); CG18508
GO:0051439	0.000336578	90.75	0.0276273	2	16	regulation of ubiquitin-protein ligase activity involved in mitotic cell cycle	0.00159041	13	Bub1; Rca1; CycE; BubR1; CG15237; Mad1; Mtor; mad2; Chro; alphaTub84B; alphaTub85E; Mps1; Bub3; rod; E(lz); CG18508
GO:0051444	0.000336578	90.75	0.0276273	2	16	negative regulation of ubiquitin-protein transferase activity	0.00159041	13	Bub1; Rca1; CycE; BubR1; CG15237; Mad1; Mtor; mad2; Chro; alphaTub84B; alphaTub85E; Mps1; Bub3; rod; E(lz); CG18508
GO:0051985	0.000336578	90.75	0.0276273	2	16	negative regulation of chromosome segregation	0.00159041	13	Bub1; BubR1; CG15237; Mad1; Mtor; mad2; CycA; Mi-2; Chro; alphaTub84B; alphaTub85E; Mps1; Bub3; rod; E(lz); CG18508
GO:0050789	0.0003496	4.73739	5.94851	14	3445	regulation of biological process	0.00159041	13	G9a; ewg; CG13375; y; ac; sc; l(1)sc; pcl; ase; CG17778; elav; Appl; vnd; Dredd; su(sable); Roc1a; Hmt4-20; SkpA; sdk; CG5273; RpL22; fz3; Rbf; MED22; mus81; TfIIA-S-2; CDC45L; CG32812; DAAM; png; Lrpprc2; Ns3; Rab27; Nmdar2; inc; dor; hfw; Adar; CG14812; MED18; Pgam5; trr; arm; mip130; Edem1; Rbcn-3B; Ocrl; Hr4; usp; CG4325; moody; CG4313; CG4199; CG4061; CG4025; CG16903; ph-p; Pgd; CG3630; pn; …
GO:0016567	0.000393483	13.7011	0.357429	4	207	protein ubiquitination	0.00159041	13	Roc1a; SkpA; CG4325; CG2924; CG2681; CG16781; rb; CG11700; dx; Pink1; CG14435; Ubr3; UbcE2H; Traf6; CG10761; CG42797; Atg8a; CG2574; CG9941; ben; CG5334; CG5347; hiw; CG8184; CG8974; Ubr1; CG8188; ari-1; fu; car; SkpD; SkpC; SkpE; HERC2; CG5440; CG4238; Su(dx); Atxn7; Hrs; msl-2; RpL40; Traf4; Bub1; bchs; Fbw5; CG16947; CG11070; cort; Nse1; CG11321; Rca1; CG8419; CG5604; Usp14; Cnot4; RpS27A; CHI…
GO:0006461	0.000397985	9.68157	0.656149	5	380	protein complex assembly	0.00159041	13	CG3708; DAAM; inc; dor; mip130; PsGEF; Klp3A; Vap-33A; spoon; sqh; Hira; Caf1-180; CG7033; AP-1gamma; Hk; Klp10A; nod; wisp; Sec16; Tomosyn; CG12096; Rbp1-like; Ndc80; eag; CG9065; CG9072; Grip128; Tcp-1zeta; Myb; ND-20; Arp2; Arpc3B; Sh; ND-18; Grip84; car; Cdc42; COX6B; mst; l(2)gl; cpb; TBCD; sau; Sec24CD; Atxn7; Arpc5; Hrs; gammaTub23C; Shaw; capu; Scox; tkv; CG31648; chic; ifc; Arpc4; Wee1; …
GO:0070271	0.000407706	9.62865	0.659603	5	382	protein complex biogenesis	0.00159041	13	CG3708; DAAM; inc; dor; mip130; PsGEF; Klp3A; Vap-33A; spoon; sqh; Hira; Caf1-180; CG7033; AP-1gamma; Hk; Klp10A; nod; wisp; Sec16; Tomosyn; CG12096; Rbp1-like; Ndc80; eag; CG9065; CG9072; Grip128; Tcp-1zeta; Myb; ND-20; Arp2; Arpc3B; Sh; ND-18; Grip84; car; Cdc42; COX6B; mst; l(2)gl; cpb; TBCD; sau; Sec24CD; Atxn7; Arpc5; Hrs; gammaTub23C; Shaw; capu; Scox; tkv; CG31648; chic; ifc; Arpc4; Wee1; …
GO:0051225	0.000416757	24.038	0.148497	3	86	spindle assembly	0.00159041	13	mip130; Klp3A; CG7033; Klp10A; nod; wisp; Ndc80; Grip128; Tcp-1zeta; Myb; Grip84; mst; sau; gammaTub23C; ifc; Wee1; mtsh; borr; Cks30A; pelo; Grip75; aurB; CG5525; twe; grp; Grip71; gammaTub37C; dia; BubR1; Mob4; Eb1; Incenp; Non1; Mtor; Cct5; Cam; cid; tum; SRPK; Lis-1; CG9975; Prosalpha3; wac; msd5; Non2; pav; mad2; ssp6; pbl; Klp67A; DCTN1-p150; mop; spd-2; polo; Prosbeta7; Tcp-1eta; mgr; Pros…
GO:0045839	0.00042824	79.3937	0.0310808	2	18	negative regulation of mitotic nuclear division	0.00159041	13	ase; Bub1; BubR1; CG15237; Mad1; Mtor; mad2; CycA; Z600; Chro; alphaTub84B; alphaTub85E; Mps1; Bub3; rod; Spt6; E(lz); CG18508
GO:0043086	0.000431158	23.75	0.150224	3	87	negative regulation of catalytic activity	0.00159041	13	CG32812; CG14812; sgg; par-6; CG6179; MKP-4; l(2)gl; Bub1; CG9135; cort; Rca1; Wee1; Spn28B; Spn28Dc; Cks30A; kek1; ics; GABA-B-R1; CycE; EndoGI; fzy; BubR1; CG15237; Spn42Db; Spn42Dc; Spn42De; Mad1; Mtor; drk; pcs; Diap2; CG8060; cer; Fak; PTP-ER; mi; fzr2; Ptp61F; ago; mad2; Cdc27; BI-1; Cbl; endos; Diap1; Mkp3; Chro; NPFR; alphaTub84B; puc; alphaTub85E; CG31391; CG14689; eff; Spn88Eb; CSN5; Mp…
GO:0031400	0.000460915	23.194	0.153677	3	89	negative regulation of protein modification process	0.00159041	13	SkpA; CG32812; sgg; N; Rala; peb; par-6; CoRest; MKP-4; et; l(2)gl; ebi; cpb; Hrs; Bub1; cort; Rca1; Wee1; Mnn1; Cks30A; Utx; Cand1; kek1; ics; CycE; fzy; BubR1; CG15237; Mad1; dap; Mtor; drk; pcs; CG8060; Fak; cpa; PTP-ER; mi; fzr2; Ptp61F; Usp5; ago; mad2; Cdc27; Cbl; PGRP-LF; I-2; endos; Mkp3; FRG1; park; Chro; alphaTub84B; puc; stck; CG8312; alphaTub85E; CG31391; CG14689; I-t; Set8; eff; CSN5…
GO:0031397	0.000478121	74.7176	0.0328075	2	19	negative regulation of protein ubiquitination	0.00159041	13	Bub1; Rca1; CycE; BubR1; CG15237; Mad1; Mtor; mad2; Chro; alphaTub84B; alphaTub85E; Mps1; hh; Bub3; rod; E(lz); Dip-B; CG18508; CG30497
GO:0051340	0.000478121	74.7176	0.0328075	2	19	regulation of ligase activity	0.00159041	13	Bub1; cort; Rca1; CycE; fzy; BubR1; CG15237; Mad1; Mtor; mad2; Chro; alphaTub84B; alphaTub85E; Mps1; Bub3; rod; E(lz); CG18508; cs
GO:0032446	0.00047873	12.9855	0.376423	4	218	protein modification by small protein conjugation	0.00159041	13	Roc1a; SkpA; CG4325; CG2924; CG2681; CG16781; rb; CG11700; dx; Pink1; CG14435; Ubr3; UbcE2H; Traf6; CG10761; CG42797; Atg8a; CG1749; CG2574; CG9941; ben; CG5334; CG5347; hiw; CG8184; CG8974; Ubr1; CG8188; ari-1; fu; car; SkpD; SkpC; SkpE; HERC2; lwr; CG5440; CG4238; Su(dx); Atxn7; Hrs; msl-2; RpL40; Traf4; Bub1; bchs; Fbw5; CG16947; CG11070; cort; Nse1; CG11321; Rca1; smt3; CG8419; CG5604; Usp14;…
GO:0032435	0.000530691	70.5611	0.0345342	2	20	negative regulation of proteasomal ubiquitin-dependent protein catabolic process	0.00159041	13	Bub1; Rca1; CycE; BubR1; CG15237; CSN4; Mad1; Mtor; mad2; CycA; Chro; alphaTub84B; alphaTub85E; CSN5; Mps1; crb; Bub3; rod; E(lz); CG18508
GO:0051782	0.000530691	70.5611	0.0345342	2	20	negative regulation of cell division	0.00159041	13	ase; Bub1; spel1; BubR1; CG15237; Mad1; Mtor; Brca2; mad2; CycA; Z600; Chro; alphaTub84B; alphaTub85E; Mps1; Bub3; rod; Spt6; E(lz); CG18508
GO:0051784	0.000530691	70.5611	0.0345342	2	20	negative regulation of nuclear division	0.00159041	13	ase; Bub1; spel1; BubR1; CG15237; Mad1; Mtor; Brca2; mad2; CycA; Z600; Chro; alphaTub84B; alphaTub85E; Mps1; Bub3; rod; Spt6; E(lz); CG18508
GO:1901799	0.000530691	70.5611	0.0345342	2	20	negative regulation of proteasomal protein catabolic process	0.00159041	13	Bub1; Rca1; CycE; BubR1; CG15237; CSN4; Mad1; Mtor; mad2; CycA; Chro; alphaTub84B; alphaTub85E; CSN5; Mps1; crb; Bub3; rod; E(lz); CG18508
GO:1903321	0.000530691	70.5611	0.0345342	2	20	negative regulation of protein modification by small protein conjugation or removal	0.00159041	13	Bub1; Rca1; Cand1; CycE; BubR1; CG15237; Mad1; Mtor; mad2; Chro; alphaTub84B; alphaTub85E; Mps1; hh; Bub3; rod; E(lz); Dip-B; CG18508; CG30497
GO:0006468	0.000532959	9.05809	0.699317	5	405	protein phosphorylation	0.00159041	13	SkpA; png; Sik2; CG16903; Raf; sgg; per; N; Rala; peb; Cdk7; RhoGAP5A; raptor; Cdc7; CG3198; Pink1; nonC; Nek2; Dsor1; Erk7; Ptpmeg2; sev; CDK2AP1; hop; Drak; PhKgamma; CkIIbeta; CG2577; Pkcdelta; LIMK1; CkIalpha; hep; lic; ben; Rab3-GEF; CG8565; mei-41; mbt; par-6; CG8173; mnb; Ada3; upd1; fu; Tao; MKP-4; et; Mer; Cdc42; S6kII; l(2)gl; Pi3K21B; ebi; cbt; Pkg21D; CG4629; cpb; aop; CG9886; CG9962;…
GO:0007346	0.000548507	12.5095	0.390236	4	226	regulation of mitotic cell cycle	0.00159041	13	ac; sc; ase; SkpA; Rbf; mus81; CDC45L; png; Klp3A; sgg; N; dgt4; mei-9; Mcm3; rux; APC7; CHES-1-like; Nek2; Smox; Moe; APC4; Dsor1; feo; RpII215; Aven; Smr; REG; ben; Myb; mei-41; fd19B; smo; ex; lwr; Mad; Spindly; slp1; slp2; Psf2; Bub1; CG14020; Rca1; Wee1; Mnn1; wg; cdc14; alien; Cks30A; me31B; Cdk1; mre11; crol; aret; Sos; spel1; Su(H); CycE; twe; Syx5; fzy; grp; CG10336; Tango6; Top2; swm; l…
GO:0042177	0.00058594	66.8421	0.0362609	2	21	negative regulation of protein catabolic process	0.00159041	13	Bub1; Rca1; CycE; BubR1; CG15237; CSN4; Mad1; Mtor; DUBAI; mad2; CycA; Chro; alphaTub84B; alphaTub85E; CSN5; Mps1; crb; Bub3; rod; E(lz); CG18508
GO:0051299	0.00058594	66.8421	0.0362609	2	21	centrosome separation	0.00159041	13	Wee1; grp; Lis-1; Khc; Topors; Klp61F; ens; Dhc64C; Klp67A; DCTN1-p150; Cep135; Rcd7; Ubc6; Sas-4; aurA; ncd; chb; Etr1; S6KL; mat(2)cell-J; pins
GO:1903051	0.00058594	66.8421	0.0362609	2	21	negative regulation of proteolysis involved in cellular protein catabolic process	0.00159041	13	Bub1; Rca1; CycE; BubR1; CG15237; CSN4; Mad1; Mtor; DUBAI; mad2; CycA; Chro; alphaTub84B; alphaTub85E; CSN5; Mps1; crb; Bub3; rod; E(lz); CG18508
GO:1903363	0.00058594	66.8421	0.0362609	2	21	negative regulation of cellular protein catabolic process	0.00159041	13	Bub1; Rca1; CycE; BubR1; CG15237; CSN4; Mad1; Mtor; DUBAI; mad2; CycA; Chro; alphaTub84B; alphaTub85E; CSN5; Mps1; crb; Bub3; rod; E(lz); CG18508
GO:0051438	0.00064386	63.495	0.0379876	2	22	regulation of ubiquitin-protein transferase activity	0.00169056	13	Bub1; cort; Rca1; CycE; fzy; Nedd8; BubR1; CG15237; Mad1; Mtor; Fem-1; mad2; Chro; alphaTub84B; alphaTub85E; CG6966; Mps1; Bub3; rod; E(lz); CG18508; CG31381
GO:0044092	0.000648261	20.5458	0.172671	3	100	negative regulation of molecular function	0.00169056	13	CG32812; CG14812; sgg; per; par-6; CG6179; MKP-4; l(2)gl; ush; tim; Bub1; CG9135; cort; Rca1; Wee1; Spn28B; Spn28Dc; Cks30A; kek1; ics; GABA-B-R1; CycE; EndoGI; fzy; tup; BubR1; CG15237; Spn42Db; Spn42Dc; Spn42De; cos; Mad1; Mtor; drk; pcs; Diap2; CG8060; Rgk2; cer; Fak; PTP-ER; mi; fzr2; emc; Ptp61F; ago; mad2; BHD; Cdc27; BI-1; Cbl; endos; Diap1; Mkp3; Chro; NPFR; alphaTub84B; puc; alphaTub85E;…
GO:1901988	0.000706628	19.9247	0.177851	3	103	negative regulation of cell cycle phase transition	0.00174722	13	SkpA; Rbf; mus81; CDC45L; mei-9; Mcm3; CHES-1-like; Dsor1; RpII215; Aven; mei-41; smo; lwr; Mad; Bub1; Mnn1; alien; me31B; Cdk1; mre11; Sos; grp; Tango6; Top2; E2f2; BubR1; CG15237; Cul1; CSN4; Cul4; CSN7; FANCI; Su(var)2-10; Mad1; dap; Rpb5; Mtor; Rcd1; Topors; Xpd; Egfr; Rcd5; Myt1; mad2; MED4; mus312; Mcm7; Cdk8; CycA; Pop2; Z600; brm; mus304; CSN1b; rept; CSN3; Rpb8; Chro; slx1; Rga; alphaTub…
GO:1901991	0.000706628	19.9247	0.177851	3	103	negative regulation of mitotic cell cycle phase transition	0.00174722	13	SkpA; Rbf; mus81; CDC45L; mei-9; Mcm3; CHES-1-like; Dsor1; RpII215; Aven; mei-41; smo; lwr; Mad; Bub1; Mnn1; alien; me31B; Cdk1; mre11; Sos; grp; Tango6; Top2; E2f2; BubR1; CG15237; Cul1; CSN4; Cul4; CSN7; FANCI; Su(var)2-10; Mad1; dap; Rpb5; Mtor; Rcd1; Topors; Xpd; Egfr; Rcd5; Myt1; mad2; MED4; mus312; Mcm7; Cdk8; CycA; Pop2; Z600; brm; mus304; CSN1b; rept; CSN3; Rpb8; Chro; slx1; Rga; alphaTub…
GO:0051640	0.000709399	11.6536	0.417864	4	242	organelle localization	0.00174722	13	Ns3; Nmd3; Syx4; Vap-33A; lva; rb; ctp; sqh; Marf; nonC; cm; Ppt1; Moe; AP-1gamma; fh; ric8a; Rph; sesB; Klp10A; dlg1; Kmn1; nod; wisp; Sec16; Tomosyn; Ndc80; NFAT; Lsd-2; Scamp; Chc; baz; corolla; mnb; AP-1-2beta; Syx16; l(2)gl; AP-2alpha; halo; Rim2; Rab5; Drp1; Hrs; Syt1; Sec5; Lam; Wee1; Nuf2; emb; grk; numb; Stam; Syx5; cni; tweek; BicD; brat; gammaTub37C; Top2; sky; Dap160; Eb1; koi; Incenp…
GO:0051338	0.000833208	18.788	0.188211	3	109	regulation of transferase activity	0.00201485	13	CG16903; sgg; Cdk7; hep; lic; Rab3-GEF; mbt; par-6; upd1; MKP-4; l(2)gl; Traf4; Bub1; cort; Rca1; Wee1; smt3; Cks30A; CycY; kek1; ics; CycE; fzy; chif; Nedd8; Dap160; step; BubR1; CG15237; alc; Mad1; dap; Mat1; Mtor; drk; pcs; CG8060; Fak; Fem-1; ASPP; PTP-ER; blw; mi; fzr2; Rac1; Ptp61F; ago; mad2; Cdc27; Cbl; fry; btl; Tak1; bora; Mkp3; wnd; CycH; Chro; Atg17; alphaTub84B; puc; ato; Atg13; Mkk4…
GO:0010948	0.000901565	18.2665	0.193391	3	112	negative regulation of cell cycle process	0.00211155	13	ase; SkpA; Rbf; mus81; CDC45L; mei-9; Mcm3; CHES-1-like; Dsor1; RpII215; Aven; mei-41; smo; lwr; Mad; Bub1; Mnn1; wg; alien; me31B; Cdk1; mre11; Sos; spel1; esg; grp; Tango6; Top2; E2f2; BubR1; CG15237; Cul1; CSN4; Cul4; CSN7; FANCI; Su(var)2-10; Mad1; dap; Rpb5; Mtor; Rcd1; Topors; Xpd; Egfr; Brca2; armi; Rcd5; Myt1; mad2; MED4; mus312; Mcm7; Cdk8; CycA; Pop2; Z600; brm; mus304; CSN1b; rept; Mi-…
GO:0065007	0.000904948	4.20778	6.47516	14	3750	biological regulation	0.00211155	13	G9a; ewg; CG13375; y; ac; sc; l(1)sc; pcl; ase; CG17778; elav; Appl; vnd; Dredd; su(sable); Roc1a; Hmt4-20; SkpA; sdk; CG5273; RpL22; fz3; Rbf; MED22; mus81; TfIIA-S-2; CDC45L; CG32812; DAAM; png; Lrpprc2; Ns3; pck; Rab27; Nmdar2; inc; dor; hfw; CG14798; Scgdelta; Adar; CG14812; MED18; Pgam5; trr; arm; mip130; Edem1; Rbcn-3B; Ocrl; Hr4; usp; Actn; CG4325; moody; CG4313; CG4199; CG4061; CG4025; CG…
GO:0065003	0.000940332	7.94571	0.792559	5	459	macromolecular complex assembly	0.00211692	13	CG3708; DAAM; sta; inc; dor; mip130; PsGEF; Klp3A; Vap-33A; Mcm3; spoon; sqh; CG3198; Mcm6; Hira; Caf1-180; HP1b; CG7033; AP-1gamma; Hk; Klp10A; nod; wisp; Sec16; Tomosyn; Bap60; CG12096; Rbp1-like; Ndc80; eag; CG9065; CG9072; Grip128; Tcp-1zeta; Myb; ND-20; U2af50; eIF-2alpha; Arp2; Arpc3B; Sh; pcm; ND-18; Grip84; car; Cdc42; COX6B; mst; l(2)gl; cpb; TBCD; sau; Sec24CD; Atxn7; Arpc5; Hrs; gammaT…
GO:0007051	0.000954553	10.733	0.452398	4	262	spindle organization	0.00211692	13	RpL22; mei-38; sta; mip130; Klp3A; eIF3ga; sgg; dgt4; RpL35; Spx; RpL7A; RpL17; CG10932; RpS6; Moe; Rbm13; CG7033; feo; Klp10A; Dlic; nod; wisp; Ndc80; Grip128; Tcp-1zeta; Myb; U2af50; eIF-2alpha; SNRPG; Axs; RpS5a; Grip84; mst; U2af38; CG7337; sau; Cwc25; gammaTub23C; toc; Dim1; RpL27A; Hel25E; eIF-4a; ifc; Wee1; smt3; snRNP-U1-70K; Nuf2; RpL36A; Pvr; mtsh; RpS13; borr; Cks30A; pelo; Dref; RpL13…
GO:0007444	0.000955003	6.47791	1.21215	6	702	imaginal disc development	0.00211692	13	G9a; ewg; pcl; svr; CG13366; CG11382; arm; Raf; boi; sgg; N; Myc; Fas2; bi; CHOp24; peb; ctp; ovo; RhoGAP5A; CG5966; rux; sqh; dx; Nf-YC; Atx-1; brk; Dok; sn; fs(1)h; Smox; Nrg; Caf1-180; oc; Lim1; Moe; Bx42; lz; btd; Sp1; Idgf4; CG15312; CG15309; dsh; hop; dlg1; Drak; bif; Amun; dy; Karl; pot; fw; LIMK1; Smr; ade5; CG12717; hep; sno; mew; Set2; NFAT; jub; l(1)G0007; Lsd-2; sog; sd; tay; Stim; ex…
GO:0071822	0.00099854	6.41934	1.22251	6	708	protein complex subunit organization	0.00217714	13	RpL22; CG3708; DAAM; mei-38; sta; inc; dor; mip130; Actn; PsGEF; Klp3A; eIF3ga; PI4KIIIalpha; sgg; N; Vap-33A; cib; dgt4; Tip60; ctp; spoon; RpL35; sqh; Spx; swa; RpL7A; RpL17; Hira; CG10932; RpS6; sn; Caf1-180; Moe; Rbm13; rdgA; CG7033; AP-1gamma; Hk; feo; Klp10A; Dlic; dsh; nod; wisp; Chrac-16; Sec16; Tomosyn; hep; CG12096; mew; Rbp1-like; up; Ndc80; Nup93-1; eag; CG9065; CG9072; Grip128; Tcp-1…
GO:0007049	0.00103502	5.54704	1.71635	7	994	cell cycle	0.00222029	13	ac; sc; ase; CG17778; SkpA; RpL22; Rbf; MED22; mus81; CDC45L; png; mei-38; sta; mip130; Ocrl; CG16903; ph-p; wapl; crn; CG2865; Raf; Klp3A; eIF3ga; sgg; fs(1)Ya; ttm50; N; ng4; Myc; Mnt; dgt4; mei-9; HLH4C; ctp; Cdk7; dhd; Mcm3; RpL35; lin-52; mof; Act5C; rux; CG5921; sqh; Spx; PpV; RpL7A; APC7; pigs; Cdc7; Mcm6; RpL17; nullo; CHES-1-like; NELF-B; CG10932; Nek2; p115; RpS6; hdm; Smox; otu; Trf4-1…
GO:0007067	0.00105296	10.4436	0.464485	4	269	mitotic nuclear division	0.00222292	13	ase; CG17778; SkpA; MED22; mip130; ph-p; Klp3A; eIF3ga; sgg; fs(1)Ya; ttm50; dgt4; Cdk7; rux; APC7; NELF-B; Nek2; Moe; APC4; CG7033; Hmr; Klp10A; Dlic; Kmn1; Ndc80; jub; shtd; Grip128; mh; Tcp-1zeta; Myb; TH1; mei-41; SMC3; CG8188; Grip84; mst; CG3436; ex; sau; Rab5; gammaTub23C; toc; CG3326; Spindly; Bub1; Cap-D3; eIF-4a; Rca1; Wee1; SA; Nuf2; cdc14; borr; Cks30A; pelo; pim; Grip75; aurB; aub; a…
GO:0030071	0.00112338	47.0074	0.0500746	2	29	regulation of mitotic metaphase/anaphase transition	0.00229861	13	sgg; APC7; APC4; Spindly; Bub1; Cks30A; Cdc23; BubR1; CG15237; Mad1; Mtor; APC10; Dhc64C; mad2; CycA; Chro; alphaTub84B; alphaTub85E; Mps1; Cdc16; Bub3; rod; cof; l(3)63Fd; E(lz); mat(2)cell-J; CG18508; CG31698; CG34234
GO:1902099	0.00112338	47.0074	0.0500746	2	29	regulation of metaphase/anaphase transition of cell cycle	0.00229861	13	sgg; APC7; APC4; Spindly; Bub1; Cks30A; Cdc23; BubR1; CG15237; Mad1; Mtor; APC10; Dhc64C; mad2; CycA; Chro; alphaTub84B; alphaTub85E; Mps1; Cdc16; Bub3; rod; cof; l(3)63Fd; E(lz); mat(2)cell-J; CG18508; CG31698; CG34234
GO:2001251	0.00136811	42.2967	0.0552547	2	32	negative regulation of chromosome organization	0.00275695	13	HP1b; CoRest; e(y)3; Bub1; Utx; msl-1; BubR1; Bap170; CG15237; Mad1; Mtor; mad2; msl-3; JIL-1; CycA; Mi-2; FRG1; Chro; alphaTub84B; alphaTub85E; su(Hw); Set8; Mps1; Mekk1; polybromo; Bub3; rod; e(y)5; E(lz); CG18508; CG33766; 5SrRNA:CR33373
GO:0050790	0.00139105	9.66045	0.500746	4	290	regulation of catalytic activity	0.00276133	13	CG32812; CG14812; Ocrl; CG16903; Pdfr; sgg; Torsin; CG4041; Cdk7; RhoGAP5A; C3G; Crag; CG1657; Evi5; hep; lic; CtsB1; Rab3-GEF; vap; mbt; RhoGAP15B; par-6; CG42684; RhoGAP16F; upd1; CG6179; RhoGAP18B; Vav; MKP-4; amn; CG1695; l(2)gl; Tbc1d15-17; drongo; CG4552; CG31935; TBCD; aph-1; Ptpa; Che-13; Traf4; Mon1; CG7742; Bub1; CG9135; PDZ-GEF; cort; Rca1; Wee1; smt3; Spn28B; Spn28Dc; Dh31; Cks30A; Rn…
GO:0032535	0.00144926	15.41	0.227926	3	132	regulation of cellular component size	0.00281335	13	Rbf; DAAM; PsGEF; gt; Myc; spoon; Erk7; Lst8; dsh; bif; lic; Myb; Arp2; mbt; Nprl2; Arpc3B; RhoGAPp190; Wnt5; Hs3st-B; rictor; Cdc42; pico; Pi3K21B; RpI135; cpb; Arpc5; lilli; Thor; capu; Arpc4; Rack1; Btk29A; Sema-1a; SCAR; aret; kuz; p38b; Arpc1; GMF; Syx5; CadN; Lar; sNPF; Arpc2; dia; Vang; stan; CG7686; wash; shot; LamC; Hr51; icln; ena; hppy; cpa; Rbpn-5; Vrp1; gek; Pdk1; mwh; Rabex-5; Rac1;…
GO:0000280	0.00149346	7.12827	0.878895	5	509	nuclear division	0.00281335	13	ase; CG17778; SkpA; MED22; mus81; mei-38; mip130; ph-p; wapl; Klp3A; eIF3ga; sgg; fs(1)Ya; ttm50; ng4; dgt4; mei-9; Cdk7; dhd; rux; APC7; NELF-B; Nek2; hdm; Moe; APC4; CG7033; His3.3B; Hmr; Klp10A; Dlic; Kmn1; nod; bif; wisp; Ndc80; jub; mamo; shtd; Grip128; mh; Tcp-1zeta; Myb; TH1; mei-41; Pp2B-14D; SMC3; Axs; Fim; corolla; CG8188; wupA; Grip84; Mer; r-cup; mst; CG3436; ex; lwr; c-cup; mio; sau;…
GO:0007091	0.00154417	39.6469	0.0587081	2	34	metaphase/anaphase transition of mitotic cell cycle	0.00281335	13	sgg; APC7; Moe; APC4; Spindly; Bub1; Cks30A; Cdc23; BubR1; CG15237; Mad1; Mtor; APC10; Slik; Dhc64C; mad2; CycA; Chro; alphaTub84B; alphaTub85E; Mps1; Cdc16; Bub3; rod; cof; Gr5a; l(3)63Fd; E(lz); Eip63F-1; mat(2)cell-J; CG18508; CG31698; snoRNA:Psi28S-2566; CG34234
GO:0010965	0.00154417	39.6469	0.0587081	2	34	regulation of mitotic sister chromatid separation	0.00281335	13	sgg; APC7; Moe; APC4; Spindly; Bub1; Cks30A; Cdc23; BubR1; CG15237; Mad1; Mtor; APC10; Slik; Dhc64C; mad2; CycA; Chro; alphaTub84B; alphaTub85E; Mps1; Cdc16; Bub3; rod; cof; Gr5a; l(3)63Fd; E(lz); Eip63F-1; mat(2)cell-J; CG18508; CG31698; snoRNA:Psi28S-2566; CG34234
GO:0033047	0.00154417	39.6469	0.0587081	2	34	regulation of mitotic sister chromatid segregation	0.00281335	13	sgg; APC7; Moe; APC4; Spindly; Bub1; Cks30A; Cdc23; BubR1; CG15237; Mad1; Mtor; APC10; Slik; Dhc64C; mad2; CycA; Chro; alphaTub84B; alphaTub85E; Mps1; Cdc16; Bub3; rod; cof; Gr5a; l(3)63Fd; E(lz); Eip63F-1; mat(2)cell-J; CG18508; CG31698; snoRNA:Psi28S-2566; CG34234
GO:0044784	0.00154417	39.6469	0.0587081	2	34	metaphase/anaphase transition of cell cycle	0.00281335	13	sgg; APC7; Moe; APC4; Spindly; Bub1; Cks30A; Cdc23; BubR1; CG15237; Mad1; Mtor; APC10; Slik; Dhc64C; mad2; CycA; Chro; alphaTub84B; alphaTub85E; Mps1; Cdc16; Bub3; rod; cof; Gr5a; l(3)63Fd; E(lz); Eip63F-1; mat(2)cell-J; CG18508; CG31698; snoRNA:Psi28S-2566; CG34234
GO:0033045	0.00163605	38.4424	0.0604348	2	35	regulation of sister chromatid segregation	0.00294046	13	sgg; APC7; Moe; APC4; Spindly; Bub1; Cks30A; Cdc23; BubR1; CG15237; Mad1; Mtor; APC10; Slik; Dhc64C; mad2; CycA; Mi-2; Chro; alphaTub84B; alphaTub85E; Mps1; Cdc16; Bub3; rod; cof; Gr5a; l(3)63Fd; E(lz); Eip63F-1; mat(2)cell-J; CG18508; CG31698; snoRNA:Psi28S-2566; CG34234
GO:0048285	0.00168446	6.92766	0.903069	5	523	organelle fission	0.00298572	13	ase; CG17778; SkpA; MED22; mus81; mei-38; Pgam5; mip130; ph-p; wapl; Klp3A; eIF3ga; sgg; fs(1)Ya; ttm50; ng4; dgt4; mei-9; Cdk7; dhd; rux; Marf; APC7; Pink1; NELF-B; Nek2; hdm; Moe; APC4; CG7033; His3.3B; Hmr; Klp10A; Dlic; Kmn1; nod; bif; wisp; Ndc80; jub; mamo; shtd; Grip128; mh; Tcp-1zeta; Myb; TH1; mei-41; Pp2B-14D; SMC3; Axs; Fim; corolla; CG8188; CG7772; wupA; Grip84; Mer; r-cup; mst; fog; …
GO:0044267	0.00170612	4.1011	3.72624	10	2158	cellular protein metabolic process	0.00298572	13	CG3038; G9a; cin; mod(r); RpL36; Roc1a; Hmt4-20; SkpA; RpL22; tw; eIF4E-7; CG32812; CG11412; png; Lrpprc2; O-fut2; sta; dor; Adar; CG14812; Pgam5; trr; mRpL16; Edem1; eIF2B-epsilon; CG4406; CG4325; Sik2; CG16903; temp; CG2924; Raf; mRpL14; tko; eIF3ga; sgg; per; eIF2B-beta; CG2680; CG2681; ttm50; CG12498; N; CG16781; CG10802; Parg; Rala; ec; brn; Tip60; tyf; CG2982; rb; peb; mRpL30; Pp2C1; Ptp4E;…
GO:0032434	0.00173047	37.3088	0.0621615	2	36	regulation of proteasomal ubiquitin-dependent protein catabolic process	0.002989	13	sgg; APC7; CkIalpha; Bub1; Rca1; Cks30A; CycE; Cdc23; Pomp; BubR1; CG15237; CSN4; Mad1; TER94; Mtor; PI31; mad2; Ufd1-like; CycA; Chro; alphaTub84B; alphaTub85E; CSN5; Mps1; Cdc16; crb; Bub3; dco; rod; cof; l(3)63Fd; E(lz); mat(2)cell-J; Best1; CG18508; CG34234
GO:0016321	0.00182745	36.24	0.0638882	2	37	female meiosis chromosome segregation	0.00305102	13	mei-38; wapl; Klp3A; mei-9; bif; mei-41; Axs; Fim; lwr; Rab5; oaf; Gli; grp; Mcm10; Hr39; sca; cnn; RfC4; pav; LanA; mus301; mtrm; RasGAP1; JIL-1; mus304; Cenp-C; cal1; Mps1; nos; Gr5a; l(1)14Db; pur1; l(2)42Bc; mei-S8; Cec-Psi1; anon-89Ba; WC1
GO:1901987	0.00186004	14.0851	0.248646	3	144	regulation of cell cycle phase transition	0.00305102	13	SkpA; Rbf; mus81; CDC45L; sgg; N; mei-9; Mcm3; rux; APC7; CHES-1-like; APC4; Dsor1; RpII215; Aven; REG; Myb; mei-41; smo; ex; lwr; Mad; Spindly; Psf2; Bub1; Rca1; Mnn1; cdc14; alien; Cks30A; me31B; Cdk1; mre11; aret; Sos; Su(H); CycE; fzy; grp; Tango6; Top2; Cdc23; E2f2; BubR1; CG15237; Cul1; CSN4; Cul4; CSN7; FANCI; Su(var)2-10; Prp38; Mad1; dap; Rpb5; Mtor; Rcd1; APC10; Topors; Xpd; Egfr; Rae1;…
GO:1901990	0.00186004	14.0851	0.248646	3	144	regulation of mitotic cell cycle phase transition	0.00305102	13	SkpA; Rbf; mus81; CDC45L; sgg; N; mei-9; Mcm3; rux; APC7; CHES-1-like; APC4; Dsor1; RpII215; Aven; REG; Myb; mei-41; smo; ex; lwr; Mad; Spindly; Psf2; Bub1; Rca1; Mnn1; cdc14; alien; Cks30A; me31B; Cdk1; mre11; aret; Sos; Su(H); CycE; fzy; grp; Tango6; Top2; Cdc23; E2f2; BubR1; CG15237; Cul1; CSN4; Cul4; CSN7; FANCI; Su(var)2-10; Prp38; Mad1; dap; Rpb5; Mtor; Rcd1; APC10; Topors; Xpd; Egfr; Rae1;…
GO:0033043	0.00186344	8.89534	0.542187	4	314	regulation of organelle organization	0.00305102	13	G9a; ase; CG17778; SkpA; DAAM; Lrpprc2; dor; Pgam5; trr; Ocrl; pn; PsGEF; z; Klp3A; sgg; Parg; dgt4; spoon; mof; rux; sqh; Marf; APC7; Pink1; Nek2; Moe; HP1b; APC4; feo; dsh; nod; Sec16; Bap60; mamo; Grip128; Myb; mei-41; Arp2; if; Arpc3B; beta-Spec; CG6867; Ada3; pcm; CoRest; Grip84; car; e(y)3; Cdc42; ebi; ex; cpb; TBCD; mio; Atxn7; Elba2; Arpc5; Drp1; Syt1; lilli; Sec5; Thor; Spindly; capu; ed…
GO:0051306	0.00192696	35.2306	0.0656149	2	38	mitotic sister chromatid separation	0.00305102	13	sgg; APC7; Moe; APC4; gammaTub23C; Spindly; Bub1; Cks30A; pim; barr; Cdc23; BubR1; CG15237; Mad1; Mtor; APC10; thr; Slik; Dhc64C; mad2; CycA; Chro; alphaTub84B; alphaTub85E; Mps1; Cdc16; Bub3; rod; cof; Gr5a; l(3)63Fd; E(lz); Eip63F-1; mat(2)cell-J; CG18508; CG31698; snoRNA:Psi28S-2566; CG34234
GO:0051983	0.00192696	35.2306	0.0656149	2	38	regulation of chromosome segregation	0.00305102	13	sgg; APC7; Moe; APC4; Spindly; Bub1; Cks30A; Cdc23; BubR1; CG15237; Mad1; Mtor; APC10; Xpd; Slik; Dhc64C; mad2; CycA; Mi-2; Chro; alphaTub84B; alphaTub85E; cal1; Mps1; Cdc16; Bub3; rod; cof; Gr5a; l(3)63Fd; pur1; E(lz); Eip63F-1; mat(2)cell-J; CG18508; CG31698; snoRNA:Psi28S-2566; CG34234
GO:0061136	0.00192696	35.2306	0.0656149	2	38	regulation of proteasomal protein catabolic process	0.00305102	13	sgg; APC7; CkIalpha; REG; Usp2; Bub1; Rca1; Cks30A; CycE; Cdc23; Pomp; BubR1; CG15237; CSN4; Mad1; TER94; Mtor; PI31; mad2; Ufd1-like; CycA; Chro; alphaTub84B; alphaTub85E; CSN5; Mps1; Cdc16; crb; Bub3; dco; rod; cof; l(3)63Fd; E(lz); mat(2)cell-J; Best1; CG18508; CG34234
GO:0031396	0.002029	34.2757	0.0673417	2	39	regulation of protein ubiquitination	0.00317479	13	rb; Atg8a; ben; fu; car; Atxn7; Hrs; Bub1; bchs; cort; Rca1; CycE; fzy; Nedd8; BubR1; CG15237; Mad1; Fbl6; Mtor; Fem-1; Rabex-5; mad2; Diap1; rpr; Chro; alphaTub84B; alphaTub85E; CG6966; Mps1; hh; Pli; Bub3; rod; Spt6; E(lz); Dip-B; CG18508; CG31381; CG30497
GO:0031330	0.00213356	33.3711	0.0690684	2	40	negative regulation of cellular catabolic process	0.00329957	13	Raf; Smox; CG12772; sesB; Sec61gamma; mio; daw; Bub1; Sec61alpha; Rca1; CycE; BubR1; CG15237; CSN4; Nup44A; babo; Mad1; Mtor; DUBAI; mad2; BI-1; CycA; Chro; alphaTub84B; Ras85D; alphaTub85E; Bruce; FK506-bp1; CSN5; Mps1; Pi3K92E; crb; Bub3; rod; MFS14; Reph; E(lz); CG18508; Gr98c; vtd
GO:1903320	0.00224063	32.5128	0.0707951	2	41	regulation of protein modification by small protein conjugation or removal	0.00342533	13	rb; Atg8a; ben; fu; car; Atxn7; Hrs; Bub1; bchs; cort; Rca1; Cand1; CycE; fzy; Nedd8; BubR1; CG15237; Mad1; Fbl6; Mtor; Fem-1; Rabex-5; mad2; Diap1; rpr; Chro; alphaTub84B; alphaTub85E; CG6966; Mps1; hh; Pli; Bub3; rod; Spt6; E(lz); Dip-B; dbo; CG18508; CG31381; CG30497
GO:0007017	0.0022764	6.44621	0.966957	5	560	microtubule-based process	0.00343492	13	CG17778; SkpA; RpL22; mei-38; sta; mip130; Unc-76; crn; egh; Klp3A; eIF3ga; sgg; Vap-33A; dgt4; ctp; RpL35; Spx; Marf; RpL7A; Pat1; RpL17; CG10932; RpS6; CG1571; Moe; Rbm13; CG7033; fh; ric8a; feo; sofe; Klp10A; Dlic; Kap3; dlg1; Kmn1; nod; Hsc70-3; wisp; Ndc80; Lsd-2; Grip128; Tcp-1zeta; Chc; Myb; kat80; U2af50; eIF-2alpha; Nup153; SNRPG; Axs; RpS5a; baz; beta-Spec; CG8142; Dhc16F; fu; Grip84; A…
GO:0009895	0.00235021	31.6975	0.0725218	2	42	negative regulation of catabolic process	0.00343492	13	Raf; Smox; CG12772; sesB; Lsd-2; Sec61gamma; mio; daw; Bub1; Sec61alpha; Rca1; CycE; BubR1; CG15237; CSN4; Nup44A; babo; Mad1; Mtor; DUBAI; mad2; BI-1; CycA; Chro; alphaTub84B; Ras85D; alphaTub85E; Bruce; FK506-bp1; CSN5; Mps1; Pi3K92E; crb; Bub3; rod; MFS14; Reph; E(lz); CG32736; CG18508; Gr98c; vtd
GO:1903050	0.00235021	31.6975	0.0725218	2	42	regulation of proteolysis involved in cellular protein catabolic process	0.00343492	13	sgg; APC7; CkIalpha; REG; Usp2; Bub1; Rca1; Cks30A; CycE; Cdc23; Pomp; BubR1; CG15237; CSN4; Mad1; TER94; Fbl6; Mtor; PI31; DUBAI; mad2; Ufd1-like; CycA; rpr; Chro; alphaTub84B; alphaTub85E; CSN5; Mps1; Cdc16; crb; Bub3; dco; rod; Spt6; cof; l(3)63Fd; E(lz); mat(2)cell-J; Best1; CG18508; CG34234
GO:1903362	0.00235021	31.6975	0.0725218	2	42	regulation of cellular protein catabolic process	0.00343492	13	sgg; APC7; CkIalpha; REG; Usp2; Bub1; Rca1; Cks30A; CycE; Cdc23; Pomp; BubR1; CG15237; CSN4; Mad1; TER94; Fbl6; Mtor; PI31; DUBAI; mad2; Ufd1-like; CycA; rpr; Chro; alphaTub84B; alphaTub85E; CSN5; Mps1; Cdc16; crb; Bub3; dco; rod; Spt6; cof; l(3)63Fd; E(lz); mat(2)cell-J; Best1; CG18508; CG34234
GO:0016310	0.00245979	6.32691	0.984224	5	570	phosphorylation	0.003556	13	SkpA; png; Lrpprc2; Sik2; CG16903; ND-B14.5A; Raf; PI4KIIIalpha; sgg; per; N; Rala; peb; Cdk7; RhoGAP5A; raptor; ND-B16.6; Cdc7; CG3198; ND-ASHI; Pink1; nonC; Nek2; ND-MNLL; ND-75; rdgA; Dsor1; Erk7; Ptpmeg2; sev; CDK2AP1; hop; Sk1; Drak; PhKgamma; CkIIbeta; CG2577; Pkcdelta; LIMK1; CkIalpha; CG32649; hep; lic; CG15743; ben; nmdyn-D6; ND-B18; Rab3-GEF; CG8565; Gapdh2; ND-20; eas; UQCR-14; mei-41;…
GO:0035295	0.00253108	5.28964	1.46425	6	848	tube development	0.0036045	13	G9a; ewg; ac; sc; l(1)sc; pcl; ase; svr; CG13366; CG11382; arm; crn; Raf; boi; sgg; N; Myc; VhaAC39-1; Fas2; bi; CHOp24; peb; pon; ctp; ovo; RhoGAP5A; Act5C; CG5966; rux; sqh; dx; Nf-YC; Atx-1; Inx2; brk; Dok; CHES-1-like; sn; fs(1)h; Smox; Nrg; Caf1-180; oc; Lim1; Moe; Bx42; Zpr1; lz; btd; Sp1; Idgf4; CG15312; CG15309; sisA; dsh; hop; dlg1; Drak; bif; Amun; dy; Karl; pot; fw; LIMK1; Smr; ade5; C…
GO:0043623	0.00255642	12.5526	0.278	3	161	cellular protein complex assembly	0.0036045	13	DAAM; dor; PsGEF; Vap-33A; spoon; sqh; AP-1gamma; nod; Tomosyn; CG12096; CG9065; CG9072; Grip128; ND-20; Arp2; Arpc3B; ND-18; Grip84; car; Cdc42; COX6B; l(2)gl; cpb; TBCD; Sec24CD; Atxn7; Arpc5; Hrs; gammaTub23C; capu; Scox; tkv; CG31648; chic; Arpc4; Btk29A; Pen; CG4908; CG5037; Grip75; SCAR; Arpc1; CG18109; GMF; CG17996; Mhc; bsf; gammaTub37C; Arpc2; Fs(2)Ket; dia; l(2)k14505; Tbce; Sec24AB; El…
GO:0022402	0.00257679	5.26953	1.46943	6	851	cell cycle process	0.0036045	13	ase; CG17778; SkpA; RpL22; Rbf; MED22; mus81; CDC45L; mei-38; sta; mip130; Ocrl; ph-p; wapl; crn; Klp3A; eIF3ga; sgg; fs(1)Ya; ttm50; N; ng4; Myc; dgt4; mei-9; ctp; Cdk7; dhd; Mcm3; RpL35; mof; Act5C; rux; CG5921; sqh; Spx; PpV; RpL7A; APC7; pigs; Mcm6; RpL17; nullo; CHES-1-like; NELF-B; CG10932; Nek2; RpS6; hdm; otu; Trf4-1; Caf1-180; Moe; Rbm13; APC4; CG7033; His3.3B; Dsor1; ric8a; Hmr; feo; so…
GO:0044772	0.00260174	12.4727	0.279727	3	162	mitotic cell cycle phase transition	0.0036045	13	SkpA; Rbf; mus81; CDC45L; sgg; N; mei-9; Mcm3; rux; CG5921; PpV; APC7; CHES-1-like; Moe; APC4; Dsor1; RpII215; Aven; REG; Myb; mei-41; CG8188; smo; ex; lwr; Mad; Spindly; Psf2; Bub1; Rca1; Mnn1; cdc14; alien; Cks30A; me31B; Cdk1; mre11; aret; Sos; Su(H); CycE; fzy; grp; Tango6; Top2; spi; Cdc23; E2f2; BubR1; CG15237; Cul1; CSN4; Cul4; CSN7; FANCI; Su(var)2-10; Prp38; Mad1; dap; Rpb5; Mtor; Rcd1; …
GO:0065009	0.00265385	8.04224	0.597441	4	346	regulation of molecular function	0.00363879	13	Rbf; CG32812; CG14812; Ocrl; CG16903; Pdfr; sgg; per; fd3F; Torsin; CG4041; Cdk7; RhoGAP5A; mof; C3G; CHES-1-like; Crag; rtv; CG1657; Evi5; hep; lic; CtsB1; Rab3-GEF; Stim; vap; mbt; RhoGAP15B; par-6; CG42684; RhoGAP16F; upd1; CG6179; fu; RhoGAP18B; Vav; MKP-4; amn; fd19B; CG1695; l(2)gl; Tbc1d15-17; ush; drongo; CG4552; CG31935; TBCD; aph-1; Ptpa; tim; Che-13; slp1; slp2; Traf4; Mon1; CG7742; Bu…
GO:0044770	0.00278804	12.1627	0.286634	3	166	cell cycle phase transition	0.00374181	13	SkpA; Rbf; mus81; CDC45L; sgg; N; mei-9; Mcm3; rux; CG5921; PpV; APC7; CHES-1-like; Moe; APC4; Dsor1; RpII215; Aven; REG; Myb; mei-41; CG8188; smo; ex; lwr; Mad; Spindly; Psf2; Bub1; Rca1; Mnn1; cdc14; alien; Cks30A; pelo; me31B; Cdk1; mre11; aret; Sos; Su(H); CycE; twe; fzy; grp; Tango6; Top2; spi; Cdc23; E2f2; BubR1; CG15237; Cul1; CSN4; Cul4; CSN7; FANCI; Su(var)2-10; Prp38; Mad1; dap; Rpb5; M…
GO:0050794	0.00279711	3.61932	5.48921	12	3179	regulation of cellular process	0.00374181	13	G9a; ewg; CG13375; ac; sc; l(1)sc; pcl; ase; CG17778; elav; Appl; vnd; Dredd; su(sable); Roc1a; Hmt4-20; SkpA; sdk; fz3; Rbf; MED22; mus81; TfIIA-S-2; CDC45L; CG32812; DAAM; png; Lrpprc2; Rab27; Nmdar2; dor; hfw; Adar; CG14812; MED18; Pgam5; trr; arm; mip130; Edem1; Rbcn-3B; Ocrl; Hr4; usp; CG4325; moody; CG4313; CG4199; CG4061; CG4025; CG16903; ph-p; Pgd; CG3630; pn; pcx; crn; CG3071; CG2865; Il…
GO:0045448	0.00281339	28.8068	0.0794286	2	46	mitotic cell cycle, embryonic	0.00374181	13	ph-p; ben; mei-41; toc; Wee1; smt3; borr; Cks30A; twe; grp; neb; dia; geminin; 14-3-3zeta; MCPH1; Psc; Ctf4; Asx; nopo; Xpd; Pu; Fmr1; CycB; CycJ; E(z); CycA; mus304; Pc; SAK; Sas-4; HP1e; Dcr-1; CycB3; l(3)mbt; stg; cutlet; rls; slm; gs(1)N41; l(1)2Bh; pins; CG18812; Res; CheB42a; CG33269; anon-Pen79B
GO:0051726	0.00297199	7.7847	0.616435	4	357	regulation of cell cycle	0.00391361	13	ac; sc; ase; SkpA; Rbf; mus81; CDC45L; png; Ocrl; CG16903; CG2865; Raf; Klp3A; eIF3ga; sgg; N; Myc; Mnt; dgt4; mei-9; HLH4C; Cdk7; Mcm3; rux; APC7; pigs; CHES-1-like; Nek2; p115; Smox; otu; Moe; APC4; Dsor1; feo; dlg1; RpII215; Kmn1; Aven; Smr; REG; Neto; ben; Rab3-GEF; CG8128; Myb; mei-41; Rad51D; Grip84; Mer; Alr; fd19B; l(2)gl; smo; ebi; ex; lwr; mio; Hrs; gammaTub23C; Mad; Spindly; slp1; slp2…
GO:0098813	0.00323692	11.5181	0.302174	3	175	nuclear chromosome segregation	0.0042207	13	mei-38; ph-p; wapl; Klp3A; sgg; mei-9; APC7; hdm; Trf4-1; Moe; APC4; Hmr; Klp10A; Kmn1; nod; bif; Ndc80; mei-41; SMC3; Axs; Fim; corolla; Mer; mst; lwr; Rab5; oaf; gammaTub23C; toc; CG3326; Spindly; Bub1; Cap-D3; cup; cort; SA; Nuf2; aust; Cks30A; pim; aurB; aub; Orc5; Gli; c(2)M; grp; glu; gammaTub37C; RanGAP; Top2; barr; neb; Cdc23; Mcm10; Hr39; BubR1; CG15237; Incenp; Mad1; Mtor; pds5; sca; Ca…
GO:0045861	0.00331598	26.3979	0.0863355	2	50	negative regulation of proteolysis	0.00424063	13	CG14812; Bub1; Rca1; Spn28B; Spn28Da; Spn28Dc; CycE; BubR1; CG15237; Spn42Db; Spn42Dc; Spn42De; CSN4; Mad1; Mtor; DUBAI; Diap2; casp; cer; Acp62F; mad2; CycA; Diap1; Spn77Ba; Chro; alphaTub84B; alphaTub85E; Spn88Eb; CSN5; Mps1; hh; crb; Bub3; rod; faf; SS3-6; onecut; olfB; E(lz); Spn88Ea; Spn42Da; Spn38F; Spn28F; Spn42Dd; Rbp2; CG18508; CR31700; CG42581; Uhg7; CR44197
GO:0051304	0.00331598	26.3979	0.0863355	2	50	chromosome separation	0.00424063	13	sgg; mei-9; APC7; hdm; Moe; APC4; Mer; gammaTub23C; Spindly; Bub1; Cap-D3; Cks30A; pim; c(2)M; glu; Top2; barr; Cdc23; BubR1; CG15237; Mad1; Mtor; Ercc1; APC10; thr; Slik; Dhc64C; mad2; mus312; CycA; Chro; alphaTub84B; alphaTub85E; Cap-H2; Mcm5; MRG15; Mps1; Cdc16; Bub3; rod; cof; Gr5a; l(3)63Fd; E(lz); Eip63F-1; mat(2)cell-J; CG18508; CG31698; snoRNA:Psi28S-2566; CG34234
GO:0032269	0.00407944	10.5815	0.328075	3	190	negative regulation of cellular protein metabolic process	0.00511854	13	SkpA; CG32812; Adar; CG14812; sgg; N; Rala; peb; Tis11; par-6; CoRest; MKP-4; Rcd-1; et; l(2)gl; ebi; cpb; Hrs; Thor; Bub1; cup; cort; Rca1; Wee1; Hrb27C; Mnn1; Spn28B; Spn28Da; Spn28Dc; Cks30A; me31B; Utx; Cand1; Ge-1; aret; kek1; loqs; ics; UK114; CycE; BicC; fzy; Nbr; Not3; BubR1; Ars2; bin3; CG15237; Spn42Db; Spn42Dc; Spn42De; drosha; CSN4; Mad1; dap; Mtor; DUBAI; drk; AGO1; pcs; Diap2; casp;…
GO:0051248	0.00407944	10.5815	0.328075	3	190	negative regulation of protein metabolic process	0.00511854	13	SkpA; CG32812; Adar; CG14812; sgg; N; Rala; peb; Tis11; par-6; CoRest; MKP-4; Rcd-1; et; l(2)gl; ebi; cpb; Hrs; Thor; Bub1; cup; cort; Rca1; Wee1; Hrb27C; Mnn1; Spn28B; Spn28Da; Spn28Dc; Cks30A; me31B; Utx; Cand1; Ge-1; aret; kek1; loqs; ics; UK114; CycE; BicC; fzy; Nbr; Not3; BubR1; Ars2; bin3; CG15237; Spn42Db; Spn42Dc; Spn42De; drosha; CSN4; Mad1; dap; Mtor; DUBAI; drk; AGO1; pcs; Diap2; casp;…
GO:0007059	0.00413991	10.5244	0.329801	3	191	chromosome segregation	0.00514587	13	CG17778; mei-38; ph-p; wapl; Klp3A; sgg; mei-9; APC7; hdm; Trf4-1; Moe; APC4; Hmr; Klp10A; Kmn1; nod; bif; Ndc80; Top1; mei-41; SMC3; Axs; Fim; corolla; Mer; mst; lwr; Rab5; oaf; gammaTub23C; toc; CG3326; Spindly; Bub1; Cap-D3; mtm; cup; cort; SA; Nuf2; aust; Cks30A; pim; aurB; aub; Orc5; Gli; c(2)M; grp; glu; gammaTub37C; RanGAP; Top2; barr; neb; Cdc23; Mcm10; Hr39; BubR1; Eb1; CG15237; Incenp; …
GO:0042176	0.00428882	23.0255	0.0984224	2	57	regulation of protein catabolic process	0.0052816	13	sgg; APC7; CkIalpha; REG; Usp2; Bub1; Fbw5; Rca1; Cks30A; l(2)gd1; CycE; Rpn3; Cdc23; Pomp; gus; BubR1; CG15237; CSN4; Cul4; Su(var)2-10; Mad1; TER94; Fbl6; Mtor; PI31; DUBAI; Fsn; mad2; Ufd1-like; CycA; rpr; Lon; Rpn1; SAK; Chro; ctrip; alphaTub84B; alphaTub85E; pic; CSN5; Mps1; Bdbt; Cdc16; Apc2; crb; Rpn2; Bub3; dco; rod; Spt6; cof; l(3)63Fd; E(lz); mat(2)cell-J; Best1; CG18508; CG34234
GO:0006796	0.00444863	4.68293	1.63865	6	949	phosphate-containing compound metabolic process	0.00542814	13	cin; SkpA; CG32812; png; Lrpprc2; Pgam5; Ocrl; CG4406; Sik2; CG16903; Pgd; ND-B14.5A; pn; Raf; Pdfr; Seipin; PI4KIIIalpha; sgg; per; CG2680; ttm50; N; dnc; Rala; Vap-33A; norpA; peb; Pp2C1; Ptp4E; Cdk7; RhoGAP5A; CG3160; GAA1; raptor; Mipp2; ND-B16.6; PpV; Cdc7; CG3198; ND-ASHI; Pink1; nonC; CG15035; Pdp; Nek2; ND-MNLL; sws; ND-75; CG11190; rdgA; Dsor1; Erk7; LPCAT; Ptpmeg2; ATPsyndelta; PPP4R2r;…
GO:0090066	0.00451431	10.194	0.340162	3	197	regulation of anatomical structure size	0.00545821	13	Rbf; DAAM; pck; PsGEF; gt; Myc; Fas2; spoon; sqh; Nrg; Erk7; Lst8; rtv; dsh; bif; lic; Chc; Myb; Arp2; mbt; Nprl2; wus; Arpc3B; RhoGAPp190; upd1; Wnt5; Hs3st-B; rictor; Cdc42; vfl; pico; Pi3K21B; RpI135; cold; ds; cpb; Sec24CD; dpp; Arpc5; lilli; Thor; bark; capu; ft; Arpc4; mmy; nrv2; wg; Wnt6; Rack1; Btk29A; Sema-1a; bib; SCAR; ab; crok; aret; kuz; p38b; Arpc1; CycE; Gli; GMF; Syx5; CadN; Lar; …
GO:0006793	0.00478258	4.60893	1.66282	6	963	phosphorus metabolic process	0.00573048	13	cin; SkpA; CG32812; png; Lrpprc2; Pgam5; Ocrl; CG4406; Sik2; CG16903; Pgd; ND-B14.5A; pn; Raf; Pdfr; Seipin; PI4KIIIalpha; sgg; per; CG2680; ttm50; N; dnc; Rala; Vap-33A; norpA; peb; Pp2C1; l(1)G0334; CG7024; Ptp4E; Cdk7; RhoGAP5A; CG3160; GAA1; raptor; Mipp2; ND-B16.6; PpV; Cdc7; CG3198; ND-ASHI; Pink1; nonC; CG15035; Pdp; Nek2; ND-MNLL; sws; ND-75; CG11190; rdgA; Dsor1; Erk7; LPCAT; Ptpmeg2; AT…
GO:0010564	0.00532351	9.59096	0.360882	3	209	regulation of cell cycle process	0.00632167	13	ase; SkpA; Rbf; mus81; CDC45L; Ocrl; Klp3A; sgg; N; dgt4; mei-9; Mcm3; rux; APC7; CHES-1-like; Nek2; otu; Moe; APC4; Dsor1; feo; RpII215; Aven; REG; Myb; mei-41; smo; ex; lwr; mio; Mad; Spindly; Psf2; Bub1; Rca1; Mnn1; wg; cdc14; alien; Cks30A; me31B; Cdk1; aurB; mre11; aret; Sos; spel1; Su(H); esg; CycE; fzy; grp; fws; Tango6; Top2; Cdc23; bru; del; E2f2; BubR1; CG15237; scra; Cul1; CSN4; Cul4; …
GO:0022607	0.00558869	4.45256	1.71635	6	994	cellular component assembly	0.00657784	13	ewg; CG13366; SkpA; tw; Rbf; CG3708; DAAM; pck; sta; inc; dor; Scgdelta; arm; mip130; Ocrl; Actn; moody; PsGEF; Klp3A; PI4KIIIalpha; sgg; kirre; N; Vap-33A; Fas2; CG15571; Femcoat; Muc4B; ctp; Bteb2; Mcm3; spoon; raptor; sqh; Top3beta; swa; Pat1; Cdc7; CG3198; Mcm6; C3G; bou; nullo; Hira; dec-1; sn; Cp36; Cp38; Nrg; Crag; Caf1-180; Moe; HP1b; CG7033; AP-1gamma; fh; Hk; sesB; Imp; Myo10A; Klp10A; …
GO:0007010	0.00570036	5.14321	1.19661	5	693	cytoskeleton organization	0.00665042	13	CG17778; CG13366; SkpA; RpL22; tw; DAAM; mei-38; sta; Scgdelta; arm; mip130; Ocrl; Actn; moody; Vinc; crn; PsGEF; egh; Klp3A; eIF3ga; PI4KIIIalpha; sgg; N; Vap-33A; cib; dgt4; ctp; spoon; RpL35; Act5C; sqh; Spx; swa; RpL7A; RpL17; C3G; pod1; nullo; CG10932; RpS6; sn; Moe; Rbm13; rdgA; CG7033; ric8a; feo; sofe; Klp10A; Dlic; Kap3; dsh; dlg1; nod; Hsc70-3; wisp; LIMK1; hep; mew; Neto; up; Ndc80; da…
GO:0007088	0.0064023	18.6044	0.12087	2	70	regulation of mitotic nuclear division	0.00734561	13	ase; Klp3A; sgg; dgt4; rux; APC7; Nek2; Moe; APC4; Myb; mei-41; ex; Spindly; Bub1; Rca1; cdc14; Cks30A; aret; CycE; fzy; Cdc23; BubR1; CG15237; dpn; Mad1; Mtor; dgt5; APC10; dgt3; Xpd; Slik; Asciz; ago; Dhc64C; mad2; CycA; endos; Z600; knrl; kni; Chro; alphaTub84B; alphaTub85E; Mps1; 14-3-3epsilon; slmb; Cdc16; Rpn9; CG13599; dgt6; stg; Bub3; ncd; rod; nej; chb; Spt6; cof; Gr5a; l(3)63Fd; red; S6…
GO:1902589	0.00641109	3.90091	2.35868	7	1366	single-organism organelle organization	0.00734561	13	G9a; ase; CG17778; CG13366; Hmt4-20; SkpA; RpL22; tw; Sec22; MED22; mus81; CDC45L; DAAM; CG11412; Lrpprc2; mei-38; sta; dor; CG14798; Scgdelta; Pex5; trr; arm; mip130; Ocrl; Actn; moody; ph-p; wapl; Vinc; crn; PsGEF; egh; Klp3A; eIF3ga; PI4KIIIalpha; sgg; fs(1)Ya; ttm50; CG12498; N; ng4; Parg; Vap-33A; cib; dgt4; Tip60; mei-9; CG2982; ctp; Cdk7; dhd; spoon; Sirt4; RpL35; CG4078; mof; rux; Btnd; s…
GO:0000226	0.00646193	6.20152	0.766659	4	444	microtubule cytoskeleton organization	0.00734561	13	CG17778; SkpA; RpL22; mei-38; sta; mip130; crn; egh; Klp3A; eIF3ga; sgg; Vap-33A; dgt4; ctp; RpL35; Spx; RpL7A; RpL17; CG10932; RpS6; Moe; Rbm13; CG7033; ric8a; feo; sofe; Klp10A; Dlic; Kap3; dlg1; nod; Hsc70-3; wisp; Ndc80; Grip128; Tcp-1zeta; Chc; Myb; U2af50; eIF-2alpha; Nup153; SNRPG; Axs; RpS5a; baz; beta-Spec; CG8142; Grip84; Nup205; mst; tilB; Cp110; l(2)gl; U2af38; ds; CG7337; TBCD; sau; …
GO:0051783	0.00713073	17.5653	0.127776	2	74	regulation of nuclear division	0.00803718	13	ase; Klp3A; sgg; dgt4; rux; APC7; Nek2; Moe; APC4; Myb; mei-41; ex; mio; Spindly; Bub1; Rca1; cdc14; Cks30A; aret; spel1; CycE; fzy; Cdc23; BubR1; CG15237; dpn; Mad1; Mtor; dgt5; APC10; dgt3; Xpd; Slik; Brca2; Asciz; ago; Dhc64C; mad2; bol; CycA; endos; Z600; knrl; kni; Chro; alphaTub84B; alphaTub85E; Mps1; 14-3-3epsilon; slmb; Cdc16; Rpn9; CG13599; dgt6; stg; Bub3; ncd; rod; nej; chb; Spt6; cof;…
GO:0019538	0.00761305	3.21834	4.53434	10	2626	protein metabolic process	0.0085087	13	CG3038; G9a; cin; pcl; svr; mod(r); RpL36; Dredd; Roc1a; Hmt4-20; SkpA; RpL22; tw; eIF4E-7; CG32812; CG11412; png; Lrpprc2; O-fut2; CG14780; sta; dor; CG3795; Adar; CG14812; Pgam5; trr; mRpL16; Edem1; eIF2B-epsilon; CG4406; CG4325; Sik2; CG16903; temp; CG2924; Raf; mRpL14; tko; eIF3ga; sgg; per; CG2658; eIF2B-beta; CG2680; CG2681; ttm50; CG12498; N; CG16781; CG10802; Parg; Rala; ec; brn; Tip60; t…
GO:0045132	0.00770064	16.8587	0.132957	2	77	meiotic chromosome segregation	0.00853487	13	mei-38; wapl; Klp3A; mei-9; hdm; nod; bif; mei-41; Axs; Fim; corolla; Mer; lwr; Rab5; oaf; Cap-D3; cup; cort; aust; Gli; c(2)M; grp; gammaTub37C; RanGAP; Top2; Mcm10; Hr39; BubR1; Incenp; sca; cnn; Ercc1; tef; Topors; mei-S332; ord; RfC4; pav; LanA; mus312; mus301; eIF4E-3; mtrm; Klp67A; RasGAP1; nudE; JIL-1; ssp2; mus304; Cenp-C; Cap-H2; Mcm5; cal1; Det; Mps1; cona; nos; ncd; Gr5a; l(1)14Db; gy;…
GO:0044085	0.00820866	4.08259	1.85794	6	1076	cellular component biogenesis	0.00902275	13	ewg; CG13366; SkpA; tw; Rbf; CG3708; DAAM; Ns3; pck; sta; inc; dor; Scgdelta; arm; mip130; Ocrl; Actn; moody; Nmd3; CG3071; PsGEF; Klp3A; PI4KIIIalpha; sgg; kirre; N; CG2875; Vap-33A; Fas2; CG15571; Femcoat; Muc4B; CG3527; ctp; Bteb2; Mcm3; spoon; GAA1; raptor; sqh; Top3beta; swa; RpL7A; Pat1; Cdc7; CG3198; Mcm6; C3G; bou; nullo; Hira; dec-1; RpS6; sn; Cp36; Cp38; Nrg; Crag; Caf1-180; CG1789; Moe…
GO:0006511	0.00844131	8.07269	0.426497	3	247	ubiquitin-dependent protein catabolic process	0.0091079	13	mod(r); SkpA; Edem1; sgg; CG2681; Rpn13R; Usp16-45; Prosbeta2R1; Usp30; Rpt4; APC7; Pink1; APC4; Rpt3; CG2247; Usp7; Uch-L5R; CkIalpha; CG4661; Fbxl4; shtd; CG8184; Prosalpha4; CG8188; Vps4; ari-1; SkpD; SkpC; SkpE; HERC2; Rpt6; Usp2; Der-1; CG4238; Su(dx); Uch; Prosbeta4R1; Prosbeta4R2; RpL40; morgue; jet; Rpn11; Bub1; Fbw5; CG13766; CG31633; CG11070; cort; Rca1; CG13088; Cks30A; Prosalpha6; CG5…
GO:0008361	0.00849158	16	0.139863	2	81	regulation of cell size	0.0091079	13	Rbf; gt; Myc; Erk7; Lst8; dsh; bif; lic; Myb; mbt; Nprl2; RhoGAPp190; Wnt5; rictor; pico; Pi3K21B; RpI135; lilli; Thor; Sema-1a; SCAR; kuz; p38b; Syx5; CadN; Lar; sNPF; Vang; stan; CG7686; shot; Hr51; icln; hppy; Pdk1; Rac1; Girdin; CG14977; Myt1; S6k; SMSr; pbl; Ilp2; CG10738; Nprl3; btl; dop; gig; Madm; CG1227; Ras85D; Tctp; foxo; Akt1; Mekk1; Pi3K92E; CG10177; Tsc1; p38a; CHORD; Cad96Ca; stg; …
GO:0010639	0.00849158	16	0.139863	2	81	negative regulation of organelle organization	0.0091079	13	ase; spoon; Pink1; HP1b; feo; beta-Spec; CoRest; e(y)3; cpb; TBCD; Bub1; Utx; spel1; GMF; fws; msl-1; bru; del; BubR1; Bap170; CG15237; Mad1; Mtor; mars; shot; Patronin; cpa; Brca2; mwh; Klp61F; alpha-Spec; dar1; Cip4; Dhc64C; mad2; msl-3; JIL-1; CycA; RhoGAP68F; flr; Cep135; Z600; Mi-2; FRG1; park; Chro; tacc; Sec8; alphaTub84B; alphaTub85E; Tango9; twf; su(Hw); Set8; Mps1; Mekk1; vib; RhoGAP92B…
GO:0019941	0.00872469	7.97273	0.431677	3	250	modification-dependent protein catabolic process	0.00928307	13	mod(r); SkpA; Edem1; sgg; CG2681; Rpn13R; Usp16-45; Prosbeta2R1; Usp30; Rpt4; APC7; Pink1; APC4; Rpt3; CG2247; Usp7; Uch-L5R; CkIalpha; CG4661; Fbxl4; shtd; CG8184; Prosalpha4; CG8188; Vps4; ari-1; SkpD; SkpC; SkpE; HERC2; Rpt6; Usp2; Der-1; CG4238; Su(dx); Uch; Prosbeta4R1; Prosbeta4R2; RpL40; morgue; jet; Rpn11; Bub1; Fbw5; CG13766; CG31633; CG11070; cort; Rca1; CG13088; Cks30A; Prosalpha6; CG5…
GO:0043632	0.00882039	7.93994	0.433404	3	251	modification-dependent macromolecule catabolic process	0.00931041	13	mod(r); SkpA; Edem1; sgg; CG2681; Rpn13R; Usp16-45; Prosbeta2R1; Usp30; Rpt4; APC7; Pink1; Trf4-1; APC4; Rpt3; CG2247; Usp7; Uch-L5R; CkIalpha; CG4661; Fbxl4; shtd; CG8184; Prosalpha4; CG8188; Vps4; ari-1; SkpD; SkpC; SkpE; HERC2; Rpt6; Usp2; Der-1; CG4238; Su(dx); Uch; Prosbeta4R1; Prosbeta4R2; RpL40; morgue; jet; Rpn11; Bub1; Fbw5; CG13766; CG31633; CG11070; cort; Rca1; CG13088; Cks30A; Prosalp…
GO:0044257	0.00901366	7.87516	0.436857	3	253	cellular protein catabolic process	0.00936576	13	mod(r); SkpA; Edem1; sgg; CG2681; Rpn13R; Usp16-45; Prosbeta2R1; Usp30; Rpt4; APC7; Pink1; APC4; Rpt3; CG2247; Usp7; Uch-L5R; CkIalpha; CG4661; REG; Fbxl4; shtd; CG8184; Prosalpha4; CG8188; Vps4; ari-1; SkpD; SkpC; SkpE; HERC2; Rpt6; Usp2; Der-1; CG4238; Su(dx); Uch; Prosbeta4R1; Prosbeta4R2; RpL40; morgue; jet; Rpn11; Bub1; Fbw5; CG13766; CG31633; CG11070; cort; Rca1; CG13088; Cks30A; Prosalpha6…
GO:0051603	0.00901366	7.87516	0.436857	3	253	proteolysis involved in cellular protein catabolic process	0.00936576	13	mod(r); SkpA; Edem1; sgg; CG2681; Rpn13R; Usp16-45; Prosbeta2R1; Usp30; Rpt4; APC7; Pink1; APC4; Rpt3; CG2247; Usp7; Uch-L5R; CkIalpha; CG4661; REG; Fbxl4; shtd; CG8184; Prosalpha4; CG8188; Vps4; ari-1; SkpD; SkpC; SkpE; HERC2; Rpt6; Usp2; Der-1; CG4238; Su(dx); Uch; Prosbeta4R1; Prosbeta4R2; RpL40; morgue; jet; Rpn11; Bub1; Fbw5; CG13766; CG31633; CG11070; cort; Rca1; CG13088; Cks30A; Prosalpha6…
GO:0006887	0.00931759	15.2241	0.14677	2	85	exocytosis	0.0096065	13	Rab27; Syx4; Vap-33A; rb; cm; p115; Rph; cac; Tomosyn; NFAT; Scamp; Chc; car; Rab35; Syx16; l(2)gl; Slh; Hrs; Syt1; Sec5; Rab6; PICK1; Syx5; BicD; Sytalpha; stmA; Syb; Syx7; Amph; stj; Syngr; Sec6; gammaSnap1; mth; nSyb; Rop; Syx17; corn; unc-13-4A; Exo70; mfr; Nrx-IV; Syx13; Sytbeta; Hip14; Syx8; Sec3; alphaSnap; Rab26; Syx6; Csp; Sec8; jagn; Syt4; Vps45; gammaSnap2; Syn; Nsf2; ldlCp; Rim; Sec15…
GO:0007143	0.00952951	15.0417	0.148497	2	86	female meiotic division	0.00974942	13	mei-38; wapl; Klp3A; sgg; mei-9; dhd; Klp10A; nod; bif; wisp; mamo; Grip128; mei-41; Pp2B-14D; Axs; Fim; corolla; lwr; Rab5; oaf; HP6; cup; cort; Cks30A; Grip75; Gli; twe; fzy; grp; Grip71; gammaTub37C; Mcm10; Hr39; BubR1; Incenp; sca; cnn; SRPK; mei-S332; ord; wac; RfC4; pav; Myt1; LanA; mus301; mtrm; RasGAP1; JIL-1; Syx13; mus304; polo; tacc; Cenp-C; msps; cal1; Mps1; nos; ball; yem; ncd; spn-A…
GO:0043933	0.00977234	3.92196	1.92701	6	1116	macromolecular complex subunit organization	0.00992153	13	G9a; Hmt4-20; RpL22; CG3708; DAAM; CG11412; mei-38; sta; inc; dor; trr; mip130; Actn; ph-p; PsGEF; z; Klp3A; eIF3ga; PI4KIIIalpha; sgg; fs(1)Ya; CG12498; N; Parg; Vap-33A; cib; dgt4; Tip60; CG2982; ctp; Mcm3; spoon; Sirt4; RpL35; mof; Act5C; Btnd; sqh; Spx; swa; RpL7A; Cdc7; CG3198; Mcm6; RpL17; Hira; CG10932; RpS6; sn; Caf1-180; Moe; Rbm13; rdgA; HP1b; CG7033; AP-1gamma; Bap111; His3.3B; Cfp1; H…
GO:0048513	0.00987819	3.56562	2.5538	7	1479	animal organ development	0.00995302	13	G9a; CG13377; ewg; ac; sc; l(1)sc; pcl; ase; svr; Appl; vnd; CG13366; sdk; tw; CG11382; CG3638; DAAM; trr; arm; usp; moody; pn; crn; temp; Raf; PsGEF; gt; boi; sgg; rst; kirre; N; Myc; Rala; fd3F; ec; cib; Fas2; norpA; bi; CHOp24; peb; pon; ctp; ovo; RhoGAP5A; lin-52; GAA1; Act5C; CG5966; rux; raptor; sqh; dx; CG3226; Pink1; C3G; Nf-YC; Atx-1; brk; Dok; CHES-1-like; sws; sn; fs(1)h; Smox; Nrg; Ca…
GO:0044260	0.00996469	2.97016	6.34048	12	3672	cellular macromolecule metabolic process	0.00996469	13	CG3038; G9a; cin; ewg; ac; sc; l(1)sc; ase; elav; vnd; mod(r); RpL36; l(1)1Bi; su(sable); Roc1a; Hmt4-20; SkpA; RpL22; tw; Rbf; MED22; mus81; TfIIA-S-2; CDC45L; su(w[a]); eIF4E-7; CG11403; CG32812; CG11412; CG11418; png; Lrpprc2; O-fut2; mei-38; sta; dor; Adar; CG14812; MED18; CG14803; Pgam5; trr; mRpL16; arm; mip130; Edem1; eIF2B-epsilon; Hr4; CG4406; usp; CG4325; Sik2; CG4061; CG4045; CG16903; …
GO:0006749	0.00736444	275.935	0.00737776	1	47	glutathione metabolic process	0.00736444	14	CG1492; CG4829; GSS; Ggt-1; GstT3; GstE13; GstT1; CG30022; GstE14; GstS1; GstE10; GstE1; GstE2; GstE3; GstE4; GstE5; GstE6; GstE7; GstE8; GstE11; Eip55E; GstE12; GstO3; se; GstO2; GstO1; CG4306; GstZ1; GstZ2; GstD9; GstD1; GstD11; GstD3; GstD5; GstD6; GstD7; GstD8; deltaTry; Ugt37c1; CG18530; CG30008; CG30382; cs; CG32198; CG32506; CG33181; CR40640
GO:0044699	8.63224e-05	4.05371	27.5412	40	7466	single-organism process	0.00322739	15	snoRNA:Or-CD9b; CG42661; CR40441; CG42870; lnr; ltr; caboose; mir-4979; mir-1009; mir-4985; CR43257; CR43466; clt; Gr98b; Rheb; Gr98c; FASN2; Hex-t1; HBS1; Gpi1; prt; Desat1; CG32396; Tsp68C; mRpS14; TotZ; mthl11; Gr93d; Gr59b; Gr22e; Ranbp16; Tre1; mir-2a-2; CG13639; CR43418; Mst77Y-2; Mst77Y-3Psi; Mst77Y-4; Mst77Y-6Psi; Mst77Y-7; Mst77Y-8; Su(E1)-A; Pif2; CR44047; CR44048; CG43710; disjointed; …
GO:0002164	0.000238908	10.0917	0.564398	5	153	larval development	0.00322739	15	mthl11; CG30025; bd; arm; Raf; sgg; kirre; N; Moe; lz; CG31950; hop; dlg1; ATP7; Set2; BthD; NnaD; Top1; CG5800; Ulp1; l(2)gl; ush; lwr; Pkg21D; ast; Eogt; dpp; CG33506; Elp3; Scox; chic; eIF-4a; lid; eya; wg; Pvr; gcm; CG4036; Hand; loh; ck; crp; heix; Syx5; Dif; ap; Cyt-b5; Lcp1; Lcp2; Lcp3; pyr; ths; Sin3A; fsd; chn; scb; lms; Pu; rad50; asrij; CG33641; tRNA:R:12Eb; snoRNA:Psi18S-176; egl; CG3…
GO:0042594	0.000269303	9.82299	0.579154	5	157	response to starvation	0.00322739	15	Gr98c; CG32396; Gr93d; CG32445; p38c; Rbf; Ns3; dor; usp; Sik2; Nmd3; CG3071; Raf; Seipin; Myc; CG3527; Atg5; tut; l(1)G0020; CG7246; Erk7; CG2972; Imp; CkIIbeta; Sec16; Fer3HCH; Rtc1; CG31099; mthl1; Nprl2; rictor; pcm; car; vtd; CG14464; Thor; CG9107; l(2)k09022; nop5; Slob; Rack1; CG13097; Mtpalpha; REPTOR-BP; p38b; CG12050; CG9422; drosha; Lpin; CG30349; CG1671; Galphao; whd; CG7637; CG12325;…
GO:0009267	0.000473466	12.3368	0.365199	4	99	cellular response to starvation	0.00322739	15	p38c; Ns3; dor; Nmd3; CG3071; Raf; CG3527; Atg5; tut; l(1)G0020; CG7246; Erk7; CG2972; CkIIbeta; Sec16; Fer3HCH; Rtc1; CG31099; Nprl2; rictor; pcm; car; vtd; CG14464; CG9107; l(2)k09022; nop5; Rack1; CG13097; CG12050; CG9422; drosha; CG30349; CG1671; CG7637; CG12325; Buffy; CG13185; Ak6; GLaz; Atg9; Lst; CG4866; Atg7; CG4038; Fib; Dcp-1; Pi3K59F; Nxt1; eIF6; Nop60B; Atg2; DopEcR; Syx17; smid; CG8…
GO:0031669	0.000491869	12.2074	0.368888	4	100	cellular response to nutrient levels	0.00322739	15	p38c; Ns3; dor; Nmd3; CG3071; Raf; CG3527; Atg5; tut; l(1)G0020; CG7246; Erk7; CG2972; CkIIbeta; Sec16; Fer3HCH; Rtc1; CG31099; Nprl2; rictor; pcm; car; vtd; CG14464; CG9107; l(2)k09022; nop5; Rack1; CG13097; CG12050; CG9422; drosha; CG30349; CG1671; CG7637; CG12325; Buffy; CG13185; Ak6; sug; GLaz; Atg9; Lst; CG4866; Atg7; CG4038; Fib; Dcp-1; Pi3K59F; Nxt1; eIF6; Nop60B; Atg2; DopEcR; Syx17; smid…
GO:0031668	0.000530195	11.9563	0.376266	4	102	cellular response to extracellular stimulus	0.00322739	15	p38c; Ns3; dor; Nmd3; CG3071; Raf; CG3527; Atg5; tut; l(1)G0020; CG7246; Erk7; CG2972; CkIIbeta; Sec16; Fer3HCH; Rtc1; CG31099; Nprl2; rictor; pcm; car; vtd; CG14464; CG9107; l(2)k09022; nop5; Rack1; CG13097; CG12050; CG9422; drosha; CG30349; CG1671; CG7637; CG12325; Buffy; CG13185; Ak6; sug; GLaz; Atg9; Lst; CG4866; Atg7; CG4038; Fib; Dcp-1; Pi3K59F; Nxt1; eIF6; Nop60B; Atg2; DopEcR; Syx17; smid…
GO:0031667	0.000600779	8.1842	0.68982	5	187	response to nutrient levels	0.00322739	15	Gr98c; CG32396; Gr93d; Gr59b; apx; CG32445; p38c; Rbf; Ns3; dor; usp; Sik2; Nmd3; CG3071; Raf; Seipin; Myc; CG3527; Atg5; tut; l(1)G0020; CG7246; Erk7; CG2972; Imp; CkIIbeta; Sec16; Fer3HCH; Rtc1; CG31099; mthl1; Nprl2; Sh; Atg101; rictor; pcm; car; vtd; CG14464; CG40485; Thor; CG9107; l(2)k09022; nop5; Slob; Rack1; SLC5A11; CG13097; Mtpalpha; REPTOR-BP; Sirt1; p38b; CG12050; CG9422; Gr43a; drosh…
GO:0009991	0.000630496	8.09394	0.697198	5	189	response to extracellular stimulus	0.00322739	15	Gr98c; CG32396; Gr93d; Gr59b; apx; CG32445; p38c; Rbf; Ns3; dor; usp; Sik2; Nmd3; CG3071; Raf; Seipin; Myc; CG3527; Atg5; tut; l(1)G0020; CG7246; Erk7; CG2972; Imp; CkIIbeta; Sec16; Fer3HCH; Rtc1; CG31099; mthl1; Nprl2; Sh; Atg101; rictor; pcm; car; vtd; CG14464; CG40485; Thor; CG9107; l(2)k09022; nop5; Slob; Rack1; SLC5A11; CG13097; Mtpalpha; REPTOR-BP; Sirt1; p38b; CG12050; CG9422; Gr43a; drosh…
GO:0071496	0.000657918	11.2612	0.398399	4	108	cellular response to external stimulus	0.00322739	15	p38c; Ns3; dor; Nmd3; CG3071; Raf; CG3527; Atg5; tut; l(1)G0020; CG7246; Erk7; CG2972; CkIIbeta; Sec16; Fer3HCH; Rtc1; CG31099; Nprl2; rictor; pcm; car; vtd; CG14464; nompC; CG9107; l(2)k09022; nop5; Rack1; Piezo; CG13097; CG12050; CG9422; drosha; CG30349; CG1671; CG7637; CG12325; Buffy; CG13185; Ak6; sug; GLaz; Atg9; Lst; CG4866; Atg7; CG4038; Fib; Dcp-1; Pi3K59F; Nxt1; eIF6; Nop60B; zip; Atg2; …
GO:0061723	0.000717197	62.642	0.0405777	2	11	glycophagy	0.00322739	15	Atg5; CG31099; Atg9; Atg2; Atg18a; Atg12; Atg1; Atg3; Atg17; GlyS; Atg6
GO:0016337	0.00199331	13.2472	0.250844	3	68	single organismal cell-cell adhesion	0.00775679	15	dpr1; arm; egh; N; brn; RhoGAP5A; Nrg; CG43394; dlg1; mew; mbt; if; baz; ds; aop; Sec24CD; CG12547; ed; ft; bdl; tkv; bib; CadN; CadN2; Itgbn; Src42A; RanBPM; O-fut1; sli; Gbp; POSH; Rab4; shg; Egfr; robo1; p130CAS; rho; alpha-Spec; Rap1; Girdin; CG32087; mop; aos; Cad74A; Mkp3; kug; Psn; Sec23; pyd; RhoL; Timp; Cad86C; Cad87A; Lkb1; Cad88C; Cad89D; Fas1; Apc2; Cad96Cb; Cad99C; pygo; Cals; mdl; C…
GO:0048856	0.00206848	2.44449	13.2726	23	3598	anatomical structure development	0.00775679	15	CR43257; clt; Gr98b; Gr98c; FASN2; Hex-t1; CG32396; mRpS14; mthl11; Ranbp16; mir-2a-2; Mst77Y-2; Mst77Y-7; Mst77Y-8; Su(E1)-A; Pif2; CR44047; CR44048; flash-flood; oak-gall; spikes; sprout; steeple; wavy-lumens; wobbly-lumens; CR43961; CR44611; CG44385; CG44405; CR44555; CR45147; Su(Ste):CR42413; Su(Ste):CR42434; mei-175; CG30025; CG30047; CG30157; prom; CG30172; CG30177; CG30323; Opbp; CG30480; …
GO:0009605	0.00225666	3.33731	3.54501	10	961	response to external stimulus	0.0078115	15	clt; Gr98c; Gpi1; CG32396; TotX; TotF; TotC; Ste12DOR; Gr93d; Gr59b; Gr22e; CR31647; CG30100; CG30323; apx; Fs(2)Etr; acd(2)5N18; acd(2)5N17; acd(2)5N15; acd(2)5M7; acd(2)5M38; acd(2)5G23; acd(2)5F3; acd(2)5E8; acd(2)5D10; CG32276; l(2)k16616; l(3)04704b; CG31819; NA; CG32445; Rpb7; CG33332; p38c; CG33339; dpr1; CG33310; G9a; ac; Dredd; Rbf; DAAM; ssx; Ns3; dor; usp; CG4325; Sik2; CG4061; Nmd3; C…
GO:0098602	0.0025388	12.122	0.272977	3	74	single organism cell adhesion	0.00796983	15	dpr1; arm; egh; N; brn; RhoGAP5A; Nrg; CG43394; dlg1; mew; mbt; if; baz; ds; aop; Sec24CD; CG12547; ed; ft; bdl; tkv; Tig; LanB1; bib; CadN; CadN2; Itgbn; Src42A; RanBPM; O-fut1; sli; Gbp; POSH; Rab4; shg; Egfr; robo1; p130CAS; rho; alpha-Spec; Rap1; Girdin; LanA; Fhos; LanB2; CG32087; mop; aos; Cad74A; Mkp3; kug; Psn; Sec23; pyd; RhoL; Timp; Cad86C; Cad87A; Lkb1; Cad88C; Cad89D; Fas1; Apc2; Cad9…
GO:0007275	0.00308443	2.38435	11.9261	21	3233	multicellular organism development	0.00796983	15	clt; Gr98b; Rheb; Gr98c; FASN2; Hex-t1; CG32396; mRpS14; mthl11; Gr93d; Ranbp16; mir-2a-2; Mst77Y-2; CR44047; flash-flood; oak-gall; spikes; sprout; steeple; wavy-lumens; wobbly-lumens; CR43961; CR44611; CG44385; CG44405; CR44555; CR44737; trnN; Su(Ste):CR42413; Su(Ste):CR42434; mei-175; CG30025; CG30047; CG30157; prom; CG30172; CG30177; CG30323; CG30480; pel; l(2)k15801; ts; mor(1)9; l(3)AM1; N-…
GO:0048732	0.00313638	7.24137	0.608665	4	165	gland development	0.00796983	15	mthl11; Raf; gt; N; brk; lz; CG31950; dsh; hop; mew; BthD; NetB; sog; exd; PH4alphaNE3; if; Wnt5; Pvf1; Ulp1; fog; l(2)gl; ush; lwr; dpp; CG33506; RpS21; Mad; tkv; chic; eya; Pvf2; Pvf3; Wnt4; wg; Wnt10; Pvr; Btk29A; gcm; CG4036; Pen; kuz; heix; Syx5; Dif; tup; dnt; spi; tsh; Src42A; Strica; so; drosha; slv; shn; jeb; SmD3; garz; fra; Drl-2; fsd; fas; scb; unc-5; sli; Rho1; Sema-2a; Dark; prod; c…
GO:0006950	0.00323262	3.00111	4.36763	11	1184	response to stress	0.00796983	15	CG42660; Gr98c; Gpi1; CG32396; TotZ; TotX; TotF; TotC; Ste12DOR; mthl11; Gr93d; Gr22e; mir-2c; CR31647; CR44047; CG30016; sprt; CG30100; CG30197; CG30323; CG30383; CG30411; cs; l(3)cl-R3; mus208; CG31819; NA; CG32445; att-ORFB; CG33337; p38c; CG33339; CG33226; AlkB; Ste:CG33237; CG33322; G9a; Appl; Dredd; SkpA; Rbf; mus81; CDC45L; CG11403; ssx; Ns3; dor; CG14798; Adar; CG14803; Pgam5; Edem1; Hr4;…
GO:0048863	0.00339778	10.8875	0.302488	3	82	stem cell differentiation	0.00796983	15	rets; p38c; CG32318; ac; sc; l(1)sc; ase; vnd; arm; N; dsh; Pdcd4; goe; run; S; dpp; CG33514; H15; mid; wg; C1GalTA; numb; aret; nub; pdm2; kuz; rk; CycE; ham; brat; spi; EcR; nito; eve; inv; en; pyr; fas; grh; stau; insc; Egfr; enok; Kr; rho; scny; lqf; klu; D; aos; Rbp6; Arf79F; hkb; Antp; hb; Ras85D; jumu; pros; svp; ems; abd-A; osa; htl; sqz; Dl; mira; tin; pnt; tll; qless; dcm; oho48E; Inx3;…
GO:0009791	0.00347929	3.60174	2.5527	8	692	post-embryonic development	0.00796983	15	Gr98b; FASN2; mthl11; CR44737; CG30025; aperA; bd; mu; Adv; E(sev)3D; bleg; Proc; pfy; LpR1; dpr1; CG33259; CG33269; G9a; ewg; pcl; svr; CG13366; CG11382; hfw; arm; Hr4; usp; Raf; boi; sgg; kirre; N; Myc; cib; Fas2; bi; ctp; ovo; RhoGAP5A; CG5966; rux; sqh; Marf; dx; Atx-1; brk; Dok; sn; fs(1)h; Smox; Trf2; CG32022; CG32039; Nrg; oc; Lim1; Moe; fh; CG31407; CG33003; lz; CG31950; btd; Sp1; CG15312…
GO:0032502	0.00354214	2.30653	14.6744	24	3978	developmental process	0.00796983	15	CR43257; clt; Gr98b; Rheb; Gr98c; FASN2; Hex-t1; CG32396; mRpS14; mthl11; Gr93d; Ranbp16; mir-2a-2; CG13639; Mst77Y-2; Mst77Y-7; Mst77Y-8; Su(E1)-A; Pif2; CR44047; CR44048; flash-flood; oak-gall; spikes; sprout; steeple; wavy-lumens; wobbly-lumens; CR43961; CR44611; CG44385; CG44405; CR44555; CR44737; CR45147; trnN; Su(Ste):CR42413; Su(Ste):CR42434; mei-175; CG30025; CG30047; CG30157; prom; CG301…
GO:0000086	0.00455448	9.76705	0.335688	3	91	G2/M transition of mitotic cell cycle	0.00964372	15	CR44047; SkpA; Rbf; mus81; CDC45L; mei-9; Mcm3; CG5921; Dsor1; RpII215; Aven; Myb; mei-41; Drsl1; lwr; alien; me31B; Cdk1; mre11; grp; Tango6; Top2; spi; Cul1; CSN4; Cul4; CSN7; FANCI; Su(var)2-10; Prp38; Rpb5; Rcd1; Topors; Xpd; Egfr; CycB; CG33668; CG13902; Mfap1; Rcd5; Myt1; MED4; mus312; Mcm7; Cdk8; CycA; Pop2; Z600; mus304; CSN1b; rept; CSN3; Rpb8; slx1; PEK; Rga; gfzf; puc; RpA-70; M1BP; Ka…
GO:0044763	0.00493077	2.26312	21.7127	31	5886	single-organism cellular process	0.00964372	15	CG42661; CG42870; CR43257; Gr98c; FASN2; Hex-t1; HBS1; Gpi1; prt; Desat1; CG32396; Tsp68C; mRpS14; TotZ; mthl11; Gr93d; Gr22e; Ranbp16; CG13639; CR43418; Mst77Y-3Psi; Mst77Y-4; Mst77Y-6Psi; Mst77Y-7; Mst77Y-8; Su(E1)-A; Pif2; CR44047; CR44048; CG43710; disjointed; CR44555; CR44737; CR45637; COX2; ATP6; trnG; trnR; trnN; trnS2; ND6; trnS1; ND1; srRNA; Su(Ste):CR42413; Su(Ste):CR42434; l(1)1Bb; l(4…
GO:0044839	0.00528828	9.23827	0.354132	3	96	cell cycle G2/M phase transition	0.00964372	15	CR44047; SkpA; Rbf; mus81; CDC45L; mei-9; Mcm3; CG5921; Dsor1; RpII215; Aven; Myb; mei-41; Drsl1; lwr; alien; pelo; me31B; Cdk1; mre11; twe; grp; Tango6; Top2; spi; Cul1; CSN4; Cul4; CSN7; FANCI; Su(var)2-10; Prp38; Rpb5; Rcd1; Topors; Xpd; Egfr; CycB; CG33668; CG13902; Mfap1; Rcd5; Myt1; MED4; mus312; dally; Mcm7; bol; Cdk8; CycA; Pop2; Z600; mus304; CSN1b; rept; CSN3; Rpb8; slx1; PEK; Rga; gfzf…
GO:0030154	0.0053862	2.35861	9.13366	17	2476	cell differentiation	0.00964372	15	CR43257; Gr98c; FASN2; mRpS14; mthl11; CG13639; Mst77Y-7; Mst77Y-8; Su(E1)-A; Pif2; CR44047; CR44048; CR44555; Su(Ste):CR42413; Su(Ste):CR42434; CG30157; CG30172; CG30323; CG30480; l(2)61E5; l(2)50F7; l(2)46F4; l(2)2D8; l(2)12A9; l(1)G0119; vst; scy; Bm; Ble; ch-b; clv-1; dil; fdg; fs(1)A180; fs(1)A214; fs(2)eo1; fs(2)eo7; fs(2)eo5; Liprin-alpha; Fs(2)Etr; CG32236; Rst(2)chl; l(1)18; mat(2)syn-D;…
GO:0001708	0.00592375	8.8545	0.368888	3	100	cell fate specification	0.00964372	15	rets; arm; N; CG32017; Ppt1; sev; dsh; exd; fd19B; S6kII; ush; aop; dpp; Mad; slp1; slp2; ed; tkv; H15; mid; eya; wg; grk; numb; da; salm; bun; Su(H); esg; sna; CycE; dac; dl; tup; eve; jeb; pcs; chn; hpo; Egfr; twi; 5SrRNA:CR33428; yki; slbo; bs; rho; sty; fd64A; vn; melt; lqf; simj; ara; btl; Tom; Brd; aos; Smn; fng; hkb; ftz; Antp; rn; ato; pyd; Ras85D; hth; pros; Ubx; abd-A; Dl; tin; bap; lbl…
GO:0048731	0.00603507	2.32684	9.23326	17	2503	system development	0.00964372	15	clt; Gr98b; Gr98c; FASN2; CG32396; mRpS14; mthl11; Ranbp16; mir-2a-2; Mst77Y-2; CR44047; flash-flood; oak-gall; spikes; sprout; steeple; wavy-lumens; wobbly-lumens; CR43961; CR44611; CG44385; CG44405; CR44555; mei-175; CG30025; CG30157; CG30172; CG30177; CG30323; CG30480; pel; l(2)k15801; ts; mor(1)9; l(3)AM1; N-b; ire; rdgD; rug; pom; l(1)TK101; ifm(2)RU7; ifm(2)RU6; l(1)TW9; Bm; aperA; ccd; fs(…
GO:0051716	0.00619759	2.46799	6.92034	14	1876	cellular response to stimulus	0.00964372	15	Gr98c; Hex-t1; TotZ; TotX; TotF; TotC; Ste12DOR; Gr93d; Gr22e; Ranbp16; mir-2a-2; CR43418; Pif2; CR44047; CR44048; CG43710; sprt; CG30056; CG30197; CG30284; CG30323; CG30343; CG30383; CG30424; CG30480; cs; l(3)cl-R3; mus208; fs(1)60; rets; pre-mod(mdg4)-N; CG46280; CR43166; NA; NA; CG32445; CG33337; p38c; CG33339; Dup99B; Ir41a; Cyp12d1-d; CG33462; dpr1; CG33226; AlkB; Ste:CG33237; CG13970; CG333…
GO:0033554	0.00638078	3.5336	2.23546	7	606	cellular response to stress	0.00964372	15	TotZ; TotX; TotF; TotC; Ste12DOR; CR44047; CG30197; CG30323; CG30383; cs; l(3)cl-R3; mus208; NA; CG33337; p38c; CG33226; Ste:CG33237; CG33322; SkpA; Rbf; mus81; CDC45L; CG11403; Ns3; dor; CG14798; CG14803; Edem1; Hr4; CG4061; Nmd3; CG3071; Raf; sgg; eIF2B-beta; N; Rala; Xpac; Tip60; mei-9; CG3527; peb; TrxT; dhd; Mcm3; XRCC1; CG4078; mof; raptor; Marf; Atg5; Dok; CHES-1-like; Traf6; Trxr-1; Corp;…
GO:1901988	0.00642915	8.58682	0.379954	3	103	negative regulation of cell cycle phase transition	0.00964372	15	CR44047; SkpA; Rbf; mus81; CDC45L; mei-9; Mcm3; CHES-1-like; Dsor1; RpII215; Aven; mei-41; Drsl1; smo; lwr; Mad; Bub1; Mnn1; alien; me31B; Cdk1; mre11; Sos; grp; Tango6; Top2; E2f2; BubR1; CG15237; Cul1; CSN4; Cul4; CSN7; FANCI; Su(var)2-10; Mad1; dap; Rpb5; Mtor; Rcd1; Topors; Xpd; Egfr; Rcd5; Myt1; mad2; MED4; mus312; Mcm7; Cdk8; CycA; Pop2; Z600; brm; mus304; CSN1b; rept; CSN3; Rpb8; Chro; slx…
GO:1901991	0.00642915	8.58682	0.379954	3	103	negative regulation of mitotic cell cycle phase transition	0.00964372	15	CR44047; SkpA; Rbf; mus81; CDC45L; mei-9; Mcm3; CHES-1-like; Dsor1; RpII215; Aven; mei-41; Drsl1; smo; lwr; Mad; Bub1; Mnn1; alien; me31B; Cdk1; mre11; Sos; grp; Tango6; Top2; E2f2; BubR1; CG15237; Cul1; CSN4; Cul4; CSN7; FANCI; Su(var)2-10; Mad1; dap; Rpb5; Mtor; Rcd1; Topors; Xpd; Egfr; Rcd5; Myt1; mad2; MED4; mus312; Mcm7; Cdk8; CycA; Pop2; Z600; brm; mus304; CSN1b; rept; CSN3; Rpb8; Chro; slx…
GO:0007391	0.00714202	8.25393	0.39471	3	107	dorsal closure	0.00991893	15	pel; Lg; l(3)cl-R3; l(3)j6E3; NA; arm; N; Rala; peb; Dok; Traf6; Myo10A; dsh; dlg1; hep; Vav; pcm; Cdc42; Npc1b; l(2)gl; cbt; ush; lwr; aop; Rab5; dpp; Mad; ed; Traf4; Cg25C; tkv; chic; PDZ-GEF; mmy; Sec61alpha; Rab30; wg; Cka; Btk29A; tup; Hakai; Src42A; Ggamma1; Pkn; Jra; shn; fas; scb; Rho1; POSH; ena; cora; Egfr; CG33668; gbb; zip; emc; Rac1; Rap1; Ack; spo; Rac2; Nmt; Nrx-IV; shd; Tak1; Dab;…
GO:0044767	0.00718361	2.15056	14.5194	23	3936	single-organism developmental process	0.00991893	15	CR43257; clt; Gr98b; Rheb; Gr98c; FASN2; Hex-t1; CG32396; mRpS14; mthl11; Gr93d; Ranbp16; mir-2a-2; CG13639; Mst77Y-2; Mst77Y-7; Mst77Y-8; Su(E1)-A; Pif2; CR44047; CR44048; flash-flood; oak-gall; spikes; sprout; steeple; wavy-lumens; wobbly-lumens; CR43961; CR44611; CG44385; CG44405; CR44555; CR44737; trnN; Su(Ste):CR42413; Su(Ste):CR42434; mei-175; CG30025; CG30047; CG30157; prom; CG30172; CG301…
GO:0098609	0.00770633	8.0206	0.405777	3	110	cell-cell adhesion	0.00991893	15	dpr1; arm; egh; rst; kirre; N; brn; Fas2; RhoGAP5A; Nrg; CG43394; dlg1; fw; mew; mbt; if; baz; ds; aop; Sec24CD; CG33511; CG33510; CG12547; ed; ft; bdl; tkv; bib; beat-Ib; beat-Ic; beat-IIIb; beat-IIIa; beat-IIIc; CadN; CadN2; Fas3; Lectin-galC1; Lar; Itgbn; Src42A; RanBPM; stan; Lac; O-fut1; scb; ItgaPS4; sli; Gbp; POSH; Rab4; shg; Egfr; robo1; ItgaPS5; p130CAS; rho; alpha-Spec; Rap1; Girdin; Co…
GO:0010948	0.00809681	7.87219	0.413154	3	112	negative regulation of cell cycle process	0.00991893	15	CR44047; ase; SkpA; Rbf; mus81; CDC45L; mei-9; Mcm3; CHES-1-like; Dsor1; RpII215; Aven; mei-41; Drsl1; smo; lwr; Mad; Bub1; Mnn1; wg; alien; me31B; Cdk1; mre11; Sos; spel1; esg; grp; Tango6; Top2; E2f2; BubR1; CG15237; Cul1; CSN4; Cul4; CSN7; FANCI; Su(var)2-10; Mad1; dap; Rpb5; Mtor; Rcd1; Topors; Xpd; Egfr; Brca2; armi; Rcd5; Myt1; mad2; MED4; mus312; Mcm7; Cdk8; CycA; Pop2; Z600; brm; mus304; …
GO:0030155	0.00817079	16.0749	0.136489	2	37	regulation of cell adhesion	0.00991893	15	dpr1; arm; N; dlg1; mbt; baz; CG6867; aop; Sec24CD; tkv; PDZ-GEF; Tig; Lar; step; pgant3; muskelin; sli; Gbp; POSH; robo1; Rac1; Rap1; LanA; Fhos; aos; Sec23; pyd; RhoL; Timp; Lkb1; eater; pygo; Ret; jbug; mdl; furrow; l(2)3A2
GO:0048869	0.00821982	2.24101	9.51362	17	2579	cellular developmental process	0.00991893	15	CR43257; Gr98c; FASN2; mRpS14; mthl11; CG13639; Mst77Y-7; Mst77Y-8; Su(E1)-A; Pif2; CR44047; CR44048; CR44555; Su(Ste):CR42413; Su(Ste):CR42434; CG30157; CG30172; CG30177; CG30323; Opbp; CG30480; l(2)61E5; l(2)50F7; l(2)46F4; l(2)2D8; l(2)12A9; l(1)G0119; vst; scy; Bm; Ble; ch-b; clv-1; dil; fdg; fs(1)A180; fs(1)A214; fs(2)eo1; fs(2)eo7; fs(2)eo5; Liprin-alpha; Fs(2)Etr; CG32236; Rst(2)chl; l(1)1…
GO:0007166	0.00838401	3.34552	2.3535	7	638	cell surface receptor signaling pathway	0.00991893	15	Gr93d; CR44048; sprt; CG30480; CG46280; CG32445; CG33462; dpr1; CG13970; CG33278; CG33493; ewg; pcl; Dredd; Roc1a; SkpA; fz3; Nmdar2; dor; trr; arm; Rbcn-3B; pcx; Ilp6; Raf; gt; boi; Pdfr; Tsp3A; sgg; N; Myc; Ilp7; Rala; VhaAC39-1; Fas2; CHOp24; peb; CG4096; Rbcn-3A; dx; pigs; shf; Nf-YC; fz4; brk; Nek2; CG10777; Smox; Traf6; Nrg; spirit; CG32391; CG34120; CG31029; alpha-Man-Ic; Kdm4B; sev; dsh; …
GO:0042692	0.00891238	7.59111	0.42791	3	116	muscle cell differentiation	0.00991893	15	l(1)sc; CG13366; tw; DAAM; Scgdelta; Actn; rst; kirre; N; C3G; CG43394; up; sd; sing; if; wupA; Vav; fliI; dock; aop; Pgk; Acp53C14c; Thor; Cg25C; LanB1; rost; numb; SCAR; Ced-12; aret; Mhc; kon; tup; mib2; Pax; blow; Gapdh1; Mef2; eve; Pfk; jeb; Mp20; mspo; pcs; Arf51F; Zasp52; Dg; Rho1; Khc; tn; hts; Act57B; Egfr; Vrp1; CG9849; twi; zip; Rac1; sty; ens; S6k; Rac2; Arp3; rhea; Zasp66; Prm; Zasp6…
GO:0035088	0.00904852	15.2036	0.143866	2	39	establishment or maintenance of apical/basal cell polarity	0.00991893	15	Moe; dsh; dlg1; baz; par-6; Vps4; l(2)gl; ds; Rab5; gkt; ft; Rbsn-5; Vps25; alc; Syx7; Dg; Rho1; fj; TBCB; Egfr; Dhc64C; DCTN1-p150; TSG101; Cont; Ras85D; Csk; yrt; crb; Exo84; AMPKalpha; prc; nate; biz; ear; ru; sie; gg; l(3)87Ae; l(2)k06107
GO:0061245	0.00904852	15.2036	0.143866	2	39	establishment or maintenance of bipolar cell polarity	0.00991893	15	Moe; dsh; dlg1; baz; par-6; Vps4; l(2)gl; ds; Rab5; gkt; ft; Rbsn-5; Vps25; alc; Syx7; Dg; Rho1; fj; TBCB; Egfr; Dhc64C; DCTN1-p150; TSG101; Cont; Ras85D; Csk; yrt; crb; Exo84; AMPKalpha; prc; nate; biz; ear; ru; sie; gg; l(3)87Ae; l(2)k06107
GO:0045930	0.00912353	7.52392	0.431599	3	117	negative regulation of mitotic cell cycle	0.00991893	15	CR44047; CG33337; ase; SkpA; Rbf; mus81; CDC45L; mei-9; Mcm3; CHES-1-like; Dsor1; RpII215; Aven; mei-41; Drsl1; smo; lwr; Mad; Bub1; CG14020; Wee1; Mnn1; alien; me31B; Cdk1; mre11; Sos; spel1; Syx5; grp; CG10336; Tango6; Top2; lok; E2f2; BubR1; CG15237; Cul1; CSN4; Cul4; CSN7; FANCI; Su(var)2-10; Mad1; dap; Rpb5; Mtor; Rcd1; Lis-1; Topors; Xpd; Egfr; CG17249; Rcd5; Myt1; mad2; MED4; mus312; Mcm7;…
GO:0048865	0.00950253	14.8023	0.147555	2	40	stem cell fate commitment	0.00991893	15	CG32318; ac; sc; l(1)sc; ase; vnd; arm; N; run; S; mid; numb; nub; kuz; CycE; ham; brat; spi; inv; en; grh; stau; insc; Egfr; Kr; rho; hkb; hb; Ras85D; jumu; pros; abd-A; osa; mira; dcm; oho48E; Inx3; Oce; dv; Ilk
GO:0009790	0.00969851	3.24788	2.4199	7	656	embryo development	0.00991893	15	pel; ale; Bow; chal; cr-b; drw; Lg; l(3)cl-R3; mit(1)2; blt; Res; l(3)j6E3; fs(3)G2; fs(3)K1; fs(3)T; zpg; CG32147; rai; rud; slt; CR40601; NA; CheB42a; dpr1; CG33269; cin; ac; l(1)sc; ase; a6; arm; ph-p; crn; Raf; gt; egh; sgg; kirre; N; Myc; Rala; brn; peb; pon; Bteb2; sqh; swa; Pat1; xit; Inx2; nullo; Dok; CHES-1-like; sn; fs(1)h; Traf6; CG32017; oc; Moe; Bx42; Dsor1; ric8a; lz; btd; Myo10A; s…
GO:0009966	0.00969851	3.24788	2.4199	7	656	regulation of signal transduction	0.00991893	15	Gr98c; CG30424; CG30480; CG46280; NA; NA; Cyp12d1-d; CG33462; dpr1; AlkB; CG33278; CG33259; CG13064; ewg; Roc1a; SkpA; dor; CG14812; trr; Rbcn-3B; CG3630; pn; Raf; PsGEF; boi; Tsp3A; sgg; N; dnc; Myc; Rala; VhaAC39-1; Fas2; norpA; CHOp24; peb; RhoGAP5A; CG4096; CG5937; Rbcn-3A; dx; pigs; CG3198; shf; Nf-YC; brk; Nek2; CG10777; Ubr3; Traf6; Corp; spirit; Crag; CG32391; CG34120; rdgA; CG31029; alph…
GO:0016203	0.00996652	14.4217	0.151244	2	41	muscle attachment	0.00996652	15	tw; C3G; mew; if; Wnt5; parvin; Sec24CD; Tsp; ab; Ced-12; kon; dnt; CAP; vg; shot; Dg; betaTub56D; Egfr; Rac1; slow; vn; akirin; Rac2; rhea; rt; Sec23; Abi; sr; nau; mbc; tx; WASp; sol; hdp-b; l(1)1Fg; furrow; NiPp1; Esm; trol; schlank; Jafrac2
GO:0001952	0.00352747	397.75	0.0035319	1	5	regulation of cell-matrix adhesion	0.00760978	16	CG6867; muskelin; Rac1; Ret; jbug
GO:0010810	0.00493536	265.125	0.00494467	1	7	regulation of cell-substrate adhesion	0.00760978	16	CG6867; muskelin; Rac1; Fhos; eater; Ret; jbug
GO:0045751	0.00563864	227.232	0.00565105	1	8	negative regulation of Toll signaling pathway	0.00760978	16	Ulp1; lwr; CG14040; Pli; puf; olfB; Spn42Da; dbo
GO:0048526	0.00563864	227.232	0.00565105	1	8	imaginal disc-derived wing expansion	0.00760978	16	arm; Hr51; alphaSnap; Timp; pygo; l(2)3A2; Spn42Da; CG32022
GO:0060326	0.00634148	198.812	0.00635743	1	9	cell chemotaxis	0.00760978	16	dpp; Mad; wun; Lrt; Aats-tyr; Dad; hh; Hmgcr; cic
GO:0035234	0.00844735	144.557	0.00847657	1	12	ectopic germ cell programmed cell death	0.00844735	16	Pink1; out; lok; wun; Buffy; EndoG; Dronc; HtrA2; cic; Dhap-at; Pif2; p38c
GO:0007143	0.00284445	30.1071	0.0809984	2	86	female meiotic division	0.0093819	17	mei-38; wapl; Klp3A; sgg; mei-9; dhd; Klp10A; nod; bif; wisp; mamo; Grip128; mei-41; Pp2B-14D; Axs; Fim; corolla; lwr; Rab5; oaf; HP6; cup; cort; Cks30A; Grip75; Gli; twe; fzy; grp; Grip71; gammaTub37C; Mcm10; Hr39; BubR1; Incenp; sca; cnn; SRPK; mei-S332; ord; wac; RfC4; pav; Myt1; LanA; mus301; mtrm; RasGAP1; JIL-1; Syx13; mus304; polo; tacc; Cenp-C; msps; cal1; Mps1; nos; ball; yem; ncd; spn-A…
GO:0021556	0.00470108	289.205	0.00470921	1	5	central nervous system formation	0.0093819	17	Dark; spz5; NT1; danr; dan
GO:0045468	0.00470108	289.205	0.00470921	1	5	regulation of R8 cell spacing in compound eye	0.0093819	17	N; sca; Egfr; Dl; E(spl)m8-HLH
GO:0044702	0.00542102	6.08104	1.26489	5	1343	single organism reproductive process	0.0093819	17	ac; Dredd; Rbf; mus81; png; mei-38; dor; arm; mip130; usp; ph-p; wapl; Raf; egh; Klp3A; Tsp3A; PI4KIIIalpha; sgg; fs(1)Yb; fs(1)Ya; N; ng4; dnc; Myc; Rala; fd3F; brn; Fas2; CG15571; Femcoat; Muc4B; mei-9; ctp; ovo; snf; dhd; spoon; Act5C; rux; raptor; sqh; wuho; Rpt4; swa; Pat1; pigs; Cdc7; Mcm6; Pink1; Inx2; Hira; dec-1; hdm; sn; Tbh; Cp7Fb; Cp7Fc; Cp36; Cp38; otu; Moe; His3.3B; Dsor1; lz; Ptpme…
GO:0006303	0.00563886	231.345	0.00565105	1	6	double-strand break repair via nonhomologous end joining	0.0093819	17	Lig4; Ku80; EndoGI; Blm; mus308; TotZ
GO:0000726	0.007512	165.221	0.00753473	1	8	non-recombinational repair	0.0093819	17	Lig4; mei-41; Ku80; EndoGI; RecQ5; Blm; mus308; TotZ
GO:0050848	0.00844735	144.557	0.00847657	1	9	regulation of calcium-mediated signaling	0.0093819	17	sgg; Ir8a; Ir40a; Lst; P32; Ir64a; TrpA1; Ir92a; l(2)k06407
GO:0022414	0.00907705	5.31099	1.42595	5	1514	reproductive process	0.0093819	17	y; ac; sc; Dredd; Rbf; mus81; png; mei-38; dor; Adar; arm; mip130; usp; ph-p; wapl; Raf; tko; egh; Klp3A; Tsp3A; PI4KIIIalpha; sgg; per; fs(1)Yb; fs(1)Ya; w; N; ng4; dnc; Myc; Rala; fd3F; brn; Fas2; CG15571; Femcoat; Muc4B; mei-9; CHOp24; ctp; ovo; snf; dhd; spoon; SPR; frma; Act5C; rux; raptor; sqh; CG11700; wuho; Rpt4; swa; Pat1; pigs; Cdc7; Mcm6; Pink1; Inx2; Hira; dec-1; hdm; sn; Tbh; Cp7Fb; …
GO:0008090	0.0093819	128.485	0.00941841	1	10	retrograde axonal transport	0.0093819	17	DCTN5-p25; Lis-1; Dhc62B; Dhc64C; DCTN1-p150; Arp1; Dlc90F; Rs1; SP1029; CG42661
GO:0021551	0.0093819	128.485	0.00941841	1	10	central nervous system morphogenesis	0.0093819	17	if; C1GalTA; Dscam1; Dark; spz5; NT1; danr; dan; Esm; CG30177
GO:1900117	0.000111282	176.514	0.0163252	2	8	regulation of execution phase of apoptosis	0.00278742	18	Rbf; lin-52; Tango7; Diap1; hid; grim; rpr; E2f1
GO:0008407	0.000147221	34.4212	0.104073	3	51	chaeta morphogenesis	0.00278742	18	ac; sc; ase; sgg; N; ctp; sn; dsh; f; B-H2; B-H1; Hs3st-B; vri; da; Arpc1; ck; tup; IKKepsilon; sca; mam; lbk; Chi; nvy; emc; h; dally; fry; Diap1; fz2; Hem; RpL13A; jagn; hyx; SelR; twf; jvl; pad; Dl; unk; WASp; Doa; spn-F; seg; oho48E; bas; ptg; Ggamma30A; RpL12; plo; Proc; Or65a
GO:0045035	0.000178397	132.365	0.0204066	2	10	sensory organ precursor cell division	0.00278742	18	numb; Dref; l(2)gd1; CycE; IKKepsilon; scra; dap; Ehbp1; Diap1; CG31029
GO:0007509	0.000217767	117.648	0.0224472	2	11	mesoderm migration involved in gastrulation	0.00278742	18	mthl1; fog; pyr; jeb; sli; sfl; sgl; pbl; byn; stumps; htl
GO:0097194	0.000217767	117.648	0.0224472	2	11	execution phase of apoptosis	0.00278742	18	Rbf; lin-52; Drep4; Drep1; Tango7; Dcp-1; Diap1; hid; grim; rpr; E2f1
GO:0042074	0.000308059	96.2424	0.0265285	2	13	cell migration involved in gastrulation	0.00328596	18	hop; mthl1; upd1; fog; pyr; jeb; sli; sfl; sgl; pbl; byn; stumps; htl
GO:0048513	0.000395502	4.78472	3.01813	10	1479	animal organ development	0.00330924	18	G9a; CG13377; ewg; ac; sc; l(1)sc; pcl; ase; svr; Appl; vnd; CG13366; sdk; tw; CG11382; CG3638; DAAM; trr; arm; usp; moody; pn; crn; temp; Raf; PsGEF; gt; boi; sgg; rst; kirre; N; Myc; Rala; fd3F; ec; cib; Fas2; norpA; bi; CHOp24; peb; pon; ctp; ovo; RhoGAP5A; lin-52; GAA1; Act5C; CG5966; rux; raptor; sqh; dx; CG3226; Pink1; C3G; Nf-YC; Atx-1; brk; Dok; CHES-1-like; sws; sn; fs(1)h; Smox; Nrg; Ca…
GO:0008078	0.000413655	81.4231	0.0306098	2	15	mesodermal cell migration	0.00330924	18	mthl1; fog; pyr; jeb; sli; Rac1; Mrtf; sfl; sgl; pbl; byn; stumps; AdamTS-A; htl; how
GO:0010604	0.000712156	6.67349	1.12848	6	553	positive regulation of macromolecule metabolic process	0.00506422	18	G9a; ac; sc; l(1)sc; ase; vnd; trr; arm; usp; pn; CG3071; Raf; z; sgg; N; Myc; tyf; rb; Bteb2; ovo; mof; MCTS1; raptor; Rpt4; APC7; Cdc7; CG3198; NELF-B; fs(1)h; CG10555; Trf2; org-1; otu; oc; Lim1; HP1b; Bap111; Dsor1; lz; btd; CDK2AP1; sisA; Met; Upf1; CkIalpha; Tis11; Brms1; hep; lic; Bap60; sno; ben; Rab3-GEF; gce; sd; Myb; exd; disco; Nup153; mbt; DENR; e(y)1; Ada3; Taf8; upd1; CrebB; Bx; fu…
GO:0031325	0.000956506	6.28808	1.19378	6	585	positive regulation of cellular metabolic process	0.00612164	18	G9a; ac; sc; l(1)sc; ase; vnd; Dredd; trr; arm; usp; pn; CG3071; Raf; z; Pdfr; sgg; N; Myc; tyf; Bteb2; ovo; mof; MCTS1; raptor; Rpt4; APC7; Cdc7; CG3198; NELF-B; fs(1)h; Traf6; CG10555; Trf2; org-1; otu; oc; Lim1; HP1b; fh; Bap111; Dsor1; lz; btd; sesB; CDK2AP1; sisA; PGRP-SA; Met; Upf1; CkIalpha; Tis11; Brms1; hep; lic; Bap60; sno; ben; Rab3-GEF; gce; sd; Myb; exd; disco; Nup153; mbt; DENR; e(y…
GO:0022416	0.00123192	16.1292	0.214269	3	105	chaeta development	0.00619767	18	ac; sc; ase; sgg; N; ctp; sn; dsh; Amun; Stim; f; B-H2; B-H1; Bx; Hs3st-B; CG14204; CG1518; al; ebi; ush; Hydr2; vri; bchs; Dref; da; holn1; CG9932; Arpc1; ck; tup; IKKepsilon; sca; mam; Sox15; lbk; CG7755; Fkbp14; Galphas; Chi; nvy; emc; CG32301; l(3)mbn; Arp3; h; dally; CG4080; fry; Cdk8; Abp1; Diap1; fz2; trc; Hem; Ten-m; CG2604; CG12163; RpL13A; jagn; rn; CG2767; pyd; hyx; SelR; CtBP; Abi; tw…
GO:0007165	0.00128048	4.29256	2.86712	9	1405	signal transduction	0.00619767	18	G9a; ewg; CG13375; pcl; Dredd; Roc1a; SkpA; fz3; Rbf; Rab27; Nmdar2; dor; hfw; CG14812; trr; arm; Edem1; Rbcn-3B; Ocrl; Hr4; usp; CG4325; moody; CG4313; CG3630; pn; pcx; Ilp6; Raf; PsGEF; gt; boi; Pdfr; Tsp3A; PI4KIIIalpha; sgg; N; dnc; Myc; Ilp7; Rala; VhaAC39-1; CG42541; Fas2; norpA; CHOp24; peb; Proc-R; SPR; RhoGAP5A; CG4096; CG32758; mof; CG16721; CG5937; raptor; Mipp2; Rbcn-3A; dx; pigs; CG3…
GO:0001707	0.00146507	40.6699	0.0571384	2	28	mesoderm formation	0.00619767	18	mthl1; fog; slp1; sna; dl; pyr; jeb; mam; sli; twi; sfl; sgl; bin; pbl; byn; nst; stumps; srp; Ubx; abd-A; htl; tin; bap; lbl; lbe; C15; slou; pan
GO:0050794	0.00148187	3.52027	6.48725	14	3179	regulation of cellular process	0.00619767	18	G9a; ewg; CG13375; ac; sc; l(1)sc; pcl; ase; CG17778; elav; Appl; vnd; Dredd; su(sable); Roc1a; Hmt4-20; SkpA; sdk; fz3; Rbf; MED22; mus81; TfIIA-S-2; CDC45L; CG32812; DAAM; png; Lrpprc2; Rab27; Nmdar2; dor; hfw; Adar; CG14812; MED18; Pgam5; trr; arm; mip130; Edem1; Rbcn-3B; Ocrl; Hr4; usp; CG4325; moody; CG4313; CG4199; CG4061; CG4025; CG16903; ph-p; Pgd; CG3630; pn; pcx; crn; CG3071; CG2865; Il…
GO:0048332	0.00168177	37.7589	0.0612197	2	30	mesoderm morphogenesis	0.00619767	18	mthl1; fog; slp1; wg; sna; dl; pyr; jeb; mam; sli; twi; miple1; sfl; sgl; bin; pbl; byn; nst; stumps; srp; Ubx; abd-A; htl; tin; bap; lbl; lbe; C15; slou; pan
GO:0044700	0.00170175	3.87493	3.62421	10	1776	single organism signaling	0.00619767	18	G9a; ewg; CG13375; pcl; Dredd; Roc1a; SkpA; fz3; Rbf; CG3690; CG14624; Rab27; Nmdar2; dor; hfw; CG14812; trr; arm; Edem1; Rbcn-3B; Ocrl; Hr4; usp; CG4325; moody; CG4313; CG3630; pn; pcx; Ilp6; Raf; PsGEF; gt; boi; Pdfr; Tsp3A; PI4KIIIalpha; sgg; Syx4; rst; N; dnc; Myc; Ilp7; Rala; VhaAC39-1; CG42541; CG2938; Vap-33A; Tip60; Fas2; norpA; CHOp24; peb; Proc-R; XRCC1; SPR; RhoGAP5A; CG4096; CG32758; …
GO:0023052	0.00171667	3.86984	3.62829	10	1778	signaling	0.00619767	18	G9a; ewg; CG13375; pcl; Dredd; Roc1a; SkpA; fz3; Rbf; CG3690; CG14624; Rab27; Nmdar2; dor; hfw; CG14812; trr; arm; Edem1; Rbcn-3B; Ocrl; Hr4; usp; CG4325; moody; CG4313; CG3630; pn; pcx; Ilp6; Raf; PsGEF; gt; boi; Pdfr; Tsp3A; PI4KIIIalpha; sgg; Syx4; rst; N; dnc; Myc; Ilp7; Rala; VhaAC39-1; CG42541; CG2938; Vap-33A; Tip60; Fas2; norpA; CHOp24; peb; Proc-R; XRCC1; SPR; RhoGAP5A; CG4096; CG32758; …
GO:0006139	0.00175909	3.69207	4.32211	11	2118	nucleobase-containing compound metabolic process	0.00619767	18	ewg; ac; sc; l(1)sc; ase; CG17896; elav; vnd; l(1)1Bi; su(sable); Hmt4-20; SkpA; Rbf; MED22; mus81; TfIIA-S-2; CDC45L; su(w[a]); CG11403; CG11418; Lrpprc2; mei-38; sta; Adar; MED18; CG14803; trr; arm; mip130; Hr4; usp; CG4061; CG4045; CG16903; ph-p; Pgd; ND-B14.5A; pn; crn; CG3071; Raf; gt; z; Pdfr; Klp3A; sgg; CG2652; per; CG2685; fs(1)Ya; crm; CG12498; N; dnc; Myc; CG10802; Parg; Mnt; fd3F; CG4…
GO:0009893	0.00183993	5.49711	1.355	6	664	positive regulation of metabolic process	0.00619767	18	G9a; ac; sc; l(1)sc; ase; vnd; Dredd; trr; arm; usp; pn; CG3071; Raf; z; Pdfr; sgg; N; Myc; tyf; rb; Torsin; Bteb2; ovo; RhoGAP5A; mof; MCTS1; raptor; Rpt4; APC7; Cdc7; CG3198; C3G; NELF-B; fs(1)h; Traf6; CG10555; Trf2; org-1; otu; Crag; oc; Lim1; HP1b; fh; Bap111; Dsor1; lz; btd; sesB; CDK2AP1; sisA; PGRP-SA; Met; Upf1; CkIalpha; Tis11; Brms1; hep; lic; Bap60; sno; ben; Rab3-GEF; gce; sd; Myb; e…
GO:0048731	0.00197476	3.51804	5.10776	12	2503	system development	0.0062389	18	G9a; CG13377; ewg; ac; sc; l(1)sc; pcl; ase; CG18273; svr; elav; Appl; vnd; CG13366; Dredd; Roc1a; SkpA; sdk; tw; MED22; CG3703; CDC45L; CG11382; CG11398; CG3638; DAAM; CG11417; CG11448; pck; rush; trr; arm; usp; moody; CG4061; CG16903; Unc-76; ph-p; pn; Nmd3; Vinc; kz; crn; temp; Raf; PsGEF; gt; boi; egh; PI4KIIIalpha; sgg; rst; kirre; N; dnc; Myc; CG2875; Mnt; Rala; fd3F; CG2901; ec; VhaAC39-1;…
GO:0034654	0.00204714	4.28452	2.45491	8	1203	nucleobase-containing compound biosynthetic process	0.0062389	18	ewg; ac; sc; l(1)sc; ase; vnd; l(1)1Bi; su(sable); Hmt4-20; Rbf; MED22; TfIIA-S-2; CDC45L; Lrpprc2; MED18; trr; arm; mip130; Hr4; usp; CG16903; ph-p; CG3071; Raf; gt; z; Pdfr; sgg; CG2652; per; crm; CG12498; N; Myc; Parg; Mnt; fd3F; CG43689; Tip60; CG2982; bi; Usf; peb; HLH4C; Bteb2; ovo; Cdk7; Vsx2; Vsx1; lin-52; mof; Rpt4; Cdc7; Mcm6; Nf-YC; CG14431; brk; CHES-1-like; Hira; NELF-B; fs(1)h; Smox…
GO:0001704	0.00215806	33.0286	0.0693823	2	34	formation of primary germ layer	0.00625087	18	mthl1; fog; dpp; Mad; slp1; tkv; sna; dl; pyr; jeb; mam; sli; twi; sfl; sgl; bin; pbl; byn; nst; hkb; stumps; srp; Ubx; abd-A; htl; tin; bap; lbl; lbe; C15; slou; fkh; pan; amx
GO:0007154	0.00238914	3.67992	3.78746	10	1856	cell communication	0.00625087	18	G9a; ewg; CG13375; pcl; Dredd; Roc1a; SkpA; fz3; Rbf; CG3690; CG14624; Ns3; Rab27; Nmdar2; dor; hfw; CG14812; trr; arm; Edem1; Rbcn-3B; Ocrl; Hr4; usp; CG4325; moody; CG4313; CG3630; pn; Nmd3; pcx; CG3071; Ilp6; Raf; PsGEF; gt; boi; Pdfr; Tsp3A; PI4KIIIalpha; sgg; Syx4; rst; N; dnc; Myc; Ilp7; Rala; VhaAC39-1; CG42541; CG2938; Vap-33A; Tip60; Fas2; norpA; CHOp24; CG3527; peb; Proc-R; XRCC1; SPR; …
GO:0065007	0.00244936	3.27857	7.65246	15	3750	biological regulation	0.00625087	18	G9a; ewg; CG13375; y; ac; sc; l(1)sc; pcl; ase; CG17778; elav; Appl; vnd; Dredd; su(sable); Roc1a; Hmt4-20; SkpA; sdk; CG5273; RpL22; fz3; Rbf; MED22; mus81; TfIIA-S-2; CDC45L; CG32812; DAAM; png; Lrpprc2; Ns3; pck; Rab27; Nmdar2; inc; dor; hfw; CG14798; Scgdelta; Adar; CG14812; MED18; Pgam5; trr; arm; mip130; Edem1; Rbcn-3B; Ocrl; Hr4; usp; Actn; CG4325; moody; CG4313; CG4199; CG4061; CG4025; CG…
GO:0046483	0.00250641	3.50693	4.50985	11	2210	heterocycle metabolic process	0.00625087	18	cin; ewg; ac; sc; l(1)sc; ase; CG3156; CG17896; elav; vnd; l(1)1Bi; su(sable); Hmt4-20; SkpA; Rbf; MED22; mus81; TfIIA-S-2; CDC45L; su(w[a]); CG11403; CG11418; Lrpprc2; mei-38; sta; dor; Adar; MED18; CG14803; trr; arm; mip130; Hr4; usp; CG4061; CG4045; CG16903; ph-p; Pgd; ND-B14.5A; pn; crn; CG3071; Raf; gt; z; Pdfr; Klp3A; sgg; CG2652; per; CG2685; fs(1)Ya; crm; w; CG12498; N; dnc; Myc; CG10802;…
GO:0051716	0.00259267	3.63378	3.82827	10	1876	cellular response to stimulus	0.00625087	18	G9a; ewg; CG13375; pcl; Dredd; Roc1a; SkpA; fz3; Rbf; mus81; CDC45L; CG11403; Ns3; Rab27; Nmdar2; dor; hfw; CG14798; CG14812; CG14803; trr; arm; Edem1; Rbcn-3B; Ocrl; Hr4; usp; CG4325; moody; CG4313; CG4061; CG3630; pn; Nmd3; pcx; CG3071; Ilp6; Raf; PsGEF; gt; boi; Pdfr; Tsp3A; PI4KIIIalpha; sgg; eIF2B-beta; N; dnc; Myc; Ilp7; Rala; VhaAC39-1; CG42541; Xpac; Tip60; Fas2; mei-9; norpA; CHOp24; CG3…
GO:0009987	0.00284384	4.72927	16.0947	23	7887	cellular process	0.00625087	18	CG3038; G9a; cin; ewg; CG13375; y; ac; sc; l(1)sc; pcl; ase; CG18273; CG3156; CG17896; CG17778; elav; Appl; vnd; CG13366; mod(r); RpL36; l(1)1Bi; Dredd; su(sable); Roc1a; Hmt4-20; SkpA; sdk; CG5254; RpL22; fz3; tw; Rbf; Sec22; MED22; CG3708; TRAM; mus81; CG3703; CG3699; CG3690; TfIIA-S-2; CDC45L; su(w[a]); eIF4E-7; CG14624; CG11398; CG11403; CG32812; DAAM; CG11412; CG11418; CG12773; CG11417; png;…
GO:0006725	0.00288407	3.4349	4.5874	11	2248	cellular aromatic compound metabolic process	0.00625087	18	ewg; y; ac; sc; l(1)sc; ase; CG3156; CG17896; elav; vnd; l(1)1Bi; su(sable); Hmt4-20; SkpA; Rbf; MED22; mus81; TfIIA-S-2; CDC45L; su(w[a]); CG11403; CG11418; Lrpprc2; mei-38; sta; dor; Adar; MED18; CG14803; trr; arm; mip130; Hr4; usp; CG4061; CG4045; CG16903; ph-p; Pgd; ND-B14.5A; pn; crn; CG3071; Raf; gt; z; Pdfr; Klp3A; sgg; CG2652; per; CG2685; fs(1)Ya; crm; w; CG12498; N; dnc; Myc; CG10802; P…
GO:0019438	0.00289036	4.03346	2.59163	8	1270	aromatic compound biosynthetic process	0.00625087	18	ewg; y; ac; sc; l(1)sc; ase; CG3156; vnd; l(1)1Bi; su(sable); Hmt4-20; Rbf; MED22; TfIIA-S-2; CDC45L; Lrpprc2; dor; MED18; trr; arm; mip130; Hr4; usp; CG16903; ph-p; CG3071; Raf; gt; z; Pdfr; sgg; CG2652; per; crm; w; CG12498; N; Myc; Parg; Mnt; fd3F; CG43689; Tip60; CG2982; bi; rb; Usf; peb; HLH4C; Bteb2; ovo; Cdk7; Vsx2; Vsx1; lin-52; mof; Rpt4; Cdc7; Mcm6; Nf-YC; CG14431; cm; brk; CHES-1-like;…
GO:0018130	0.00296294	4.01579	2.60184	8	1275	heterocycle biosynthetic process	0.00625087	18	cin; ewg; ac; sc; l(1)sc; ase; CG3156; vnd; l(1)1Bi; su(sable); Hmt4-20; Rbf; MED22; TfIIA-S-2; CDC45L; Lrpprc2; dor; MED18; trr; arm; mip130; Hr4; usp; CG16903; ph-p; CG3071; Raf; gt; z; Pdfr; sgg; CG2652; per; crm; w; CG12498; N; Myc; Parg; Mnt; fd3F; CG43689; Tip60; CG2982; bi; rb; Usf; peb; HLH4C; Bteb2; ovo; Cdk7; Vsx2; Vsx1; lin-52; mof; Rpt4; Cdc7; Mcm6; Nf-YC; CG14431; cm; brk; CHES-1-lik…
GO:0016070	0.00302776	3.73641	3.23852	9	1587	RNA metabolic process	0.00625087	18	ewg; ac; sc; l(1)sc; ase; elav; vnd; l(1)1Bi; su(sable); Hmt4-20; Rbf; MED22; TfIIA-S-2; su(w[a]); CG11418; Lrpprc2; sta; Adar; MED18; trr; arm; mip130; Hr4; usp; CG4061; CG4045; CG16903; ph-p; crn; CG3071; Raf; gt; z; sgg; CG2652; per; CG2685; crm; CG12498; N; Myc; CG10802; Parg; Mnt; fd3F; CG43689; CG6379; Tip60; CG2982; bi; Usf; CG3527; peb; HLH4C; Bteb2; ovo; CG17764; Cdk7; snf; Rnp4F; Vsx2; …
GO:0050789	0.00338439	3.1569	7.03006	14	3445	regulation of biological process	0.00649586	18	G9a; ewg; CG13375; y; ac; sc; l(1)sc; pcl; ase; CG17778; elav; Appl; vnd; Dredd; su(sable); Roc1a; Hmt4-20; SkpA; sdk; CG5273; RpL22; fz3; Rbf; MED22; mus81; TfIIA-S-2; CDC45L; CG32812; DAAM; png; Lrpprc2; Ns3; Rab27; Nmdar2; inc; dor; hfw; Adar; CG14812; MED18; Pgam5; trr; arm; mip130; Edem1; Rbcn-3B; Ocrl; Hr4; usp; CG4325; moody; CG4313; CG4199; CG4061; CG4025; CG16903; ph-p; Pgd; CG3630; pn; …
GO:1901362	0.00358015	3.88259	2.68142	8	1314	organic cyclic compound biosynthetic process	0.00649586	18	cin; ewg; y; ac; sc; l(1)sc; ase; CG3156; vnd; l(1)1Bi; su(sable); Hmt4-20; Rbf; MED22; TfIIA-S-2; CDC45L; Lrpprc2; dor; MED18; trr; arm; mip130; Hr4; usp; CG16903; ph-p; CG3071; Raf; gt; z; Pdfr; sgg; CG2652; per; crm; w; CG12498; N; Myc; Parg; Mnt; fd3F; CG43689; Tip60; CG2982; bi; rb; Usf; peb; HLH4C; Bteb2; ovo; Cdk7; Vsx2; Vsx1; lin-52; mof; Rpt4; Marf; Cdc7; Mcm6; Nf-YC; CG14431; cm; brk; C…
GO:0045893	0.00372984	7.15729	0.650969	4	319	positive regulation of transcription, DNA-templated	0.00649586	18	ac; sc; l(1)sc; ase; vnd; trr; arm; usp; CG3071; z; N; Myc; Bteb2; ovo; mof; Rpt4; NELF-B; fs(1)h; CG10555; Trf2; org-1; oc; Lim1; HP1b; Bap111; lz; btd; sisA; Met; Brms1; hep; Bap60; sno; gce; sd; Myb; exd; disco; Nup153; e(y)1; Ada3; Taf8; CrebB; Bx; fu; CoRest; e(y)3; vfl; fd19B; run; cbt; Pph13; Saf6; Axud1; Mad; odd; bowl; slp1; slp2; Cf2; H15; mid; tomb; Daxx; eya; wg; Wnt6; Trf; Su(var)205…
GO:1902680	0.00372984	7.15729	0.650969	4	319	positive regulation of RNA biosynthetic process	0.00649586	18	ac; sc; l(1)sc; ase; vnd; trr; arm; usp; CG3071; z; N; Myc; Bteb2; ovo; mof; Rpt4; NELF-B; fs(1)h; CG10555; Trf2; org-1; oc; Lim1; HP1b; Bap111; lz; btd; sisA; Met; Brms1; hep; Bap60; sno; gce; sd; Myb; exd; disco; Nup153; e(y)1; Ada3; Taf8; CrebB; Bx; fu; CoRest; e(y)3; vfl; fd19B; run; cbt; Pph13; Saf6; Axud1; Mad; odd; bowl; slp1; slp2; Cf2; H15; mid; tomb; Daxx; eya; wg; Wnt6; Trf; Su(var)205…
GO:1903508	0.00372984	7.15729	0.650969	4	319	positive regulation of nucleic acid-templated transcription	0.00649586	18	ac; sc; l(1)sc; ase; vnd; trr; arm; usp; CG3071; z; N; Myc; Bteb2; ovo; mof; Rpt4; NELF-B; fs(1)h; CG10555; Trf2; org-1; oc; Lim1; HP1b; Bap111; lz; btd; sisA; Met; Brms1; hep; Bap60; sno; gce; sd; Myb; exd; disco; Nup153; e(y)1; Ada3; Taf8; CrebB; Bx; fu; CoRest; e(y)3; vfl; fd19B; run; cbt; Pph13; Saf6; Axud1; Mad; odd; bowl; slp1; slp2; Cf2; H15; mid; tomb; Daxx; eya; wg; Wnt6; Trf; Su(var)205…
GO:1901360	0.00375542	3.30143	4.7384	11	2322	organic cyclic compound metabolic process	0.00649586	18	cin; ewg; y; ac; sc; l(1)sc; ase; CG3156; CG17896; elav; vnd; l(1)1Bi; su(sable); Hmt4-20; SkpA; Rbf; MED22; mus81; TfIIA-S-2; CDC45L; su(w[a]); CG11403; CG11418; Lrpprc2; mei-38; sta; dor; Adar; MED18; CG14803; trr; arm; mip130; Hr4; usp; CG4061; CG4045; CG16903; ph-p; Pgd; ND-B14.5A; pn; crn; CG3071; Raf; gt; z; Pdfr; Klp3A; sgg; CG2652; per; CG2685; fs(1)Ya; crm; w; CG12498; N; dnc; Myc; CG108…
GO:0006351	0.00410437	4.12724	2.14065	7	1049	transcription, DNA-templated	0.00650975	18	ewg; ac; sc; l(1)sc; ase; vnd; l(1)1Bi; su(sable); Hmt4-20; Rbf; MED22; TfIIA-S-2; Lrpprc2; MED18; trr; arm; mip130; Hr4; usp; CG16903; ph-p; CG3071; Raf; gt; z; sgg; CG2652; per; crm; CG12498; N; Myc; Parg; Mnt; fd3F; CG43689; Tip60; CG2982; bi; Usf; peb; HLH4C; Bteb2; ovo; Cdk7; Vsx2; Vsx1; lin-52; mof; Rpt4; Nf-YC; CG14431; brk; CHES-1-like; Hira; NELF-B; fs(1)h; Smox; CG10555; Trf2; org-1; oc…
GO:0097659	0.00410437	4.12724	2.14065	7	1049	nucleic acid-templated transcription	0.00650975	18	ewg; ac; sc; l(1)sc; ase; vnd; l(1)1Bi; su(sable); Hmt4-20; Rbf; MED22; TfIIA-S-2; Lrpprc2; MED18; trr; arm; mip130; Hr4; usp; CG16903; ph-p; CG3071; Raf; gt; z; sgg; CG2652; per; crm; CG12498; N; Myc; Parg; Mnt; fd3F; CG43689; Tip60; CG2982; bi; Usf; peb; HLH4C; Bteb2; ovo; Cdk7; Vsx2; Vsx1; lin-52; mof; Rpt4; Nf-YC; CG14431; brk; CHES-1-like; Hira; NELF-B; fs(1)h; Smox; CG10555; Trf2; org-1; oc…
GO:0051254	0.00416438	6.93147	0.671376	4	329	positive regulation of RNA metabolic process	0.00650975	18	ac; sc; l(1)sc; ase; vnd; trr; arm; usp; CG3071; z; N; Myc; Bteb2; ovo; mof; Rpt4; NELF-B; fs(1)h; CG10555; Trf2; org-1; oc; Lim1; HP1b; Bap111; lz; btd; sisA; Met; Upf1; Tis11; Brms1; hep; Bap60; sno; gce; sd; Myb; exd; disco; Nup153; e(y)1; Ada3; Taf8; CrebB; Bx; fu; CoRest; e(y)3; vfl; fd19B; run; cbt; Pph13; Saf6; Axud1; Mad; odd; bowl; slp1; slp2; Cf2; H15; mid; tomb; Daxx; eya; wg; Wnt6; Tr…
GO:0032774	0.00417031	4.11433	2.14677	7	1052	RNA biosynthetic process	0.00650975	18	ewg; ac; sc; l(1)sc; ase; vnd; l(1)1Bi; su(sable); Hmt4-20; Rbf; MED22; TfIIA-S-2; Lrpprc2; MED18; trr; arm; mip130; Hr4; usp; CG16903; ph-p; CG3071; Raf; gt; z; sgg; CG2652; per; crm; CG12498; N; Myc; Parg; Mnt; fd3F; CG43689; Tip60; CG2982; bi; Usf; peb; HLH4C; Bteb2; ovo; Cdk7; Vsx2; Vsx1; lin-52; mof; Rpt4; Nf-YC; CG14431; brk; CHES-1-like; Hira; NELF-B; fs(1)h; Smox; CG10555; Trf2; org-1; oc…
GO:0010557	0.00529217	6.46134	0.718311	4	352	positive regulation of macromolecule biosynthetic process	0.00787672	18	ac; sc; l(1)sc; ase; vnd; trr; arm; usp; pn; CG3071; z; N; Myc; tyf; Bteb2; ovo; mof; MCTS1; Rpt4; Cdc7; NELF-B; fs(1)h; CG10555; Trf2; org-1; otu; oc; Lim1; HP1b; Bap111; lz; btd; sisA; Met; Brms1; hep; Bap60; sno; gce; sd; Myb; exd; disco; Nup153; DENR; e(y)1; Ada3; Taf8; CrebB; Bx; fu; CoRest; e(y)3; vfl; fd19B; run; cbt; Pph13; Saf6; Axud1; Mad; odd; bowl; slp1; slp2; mxt; Cf2; H15; mid; tomb…
GO:0045935	0.00529217	6.46134	0.718311	4	352	positive regulation of nucleobase-containing compound metabolic process	0.00787672	18	ac; sc; l(1)sc; ase; vnd; trr; arm; usp; pn; CG3071; z; Pdfr; N; Myc; Bteb2; ovo; mof; Rpt4; Cdc7; NELF-B; fs(1)h; CG10555; Trf2; org-1; otu; oc; Lim1; HP1b; Bap111; lz; btd; sesB; sisA; Met; Upf1; Tis11; Brms1; hep; Bap60; sno; gce; sd; Myb; exd; disco; Nup153; e(y)1; Ada3; Taf8; CrebB; Bx; fu; CoRest; e(y)3; vfl; amn; fd19B; run; cbt; Pph13; Saf6; Axud1; Mad; odd; bowl; slp1; slp2; Cf2; Scox; H…
GO:0007423	0.00562258	5.04529	1.1795	5	578	sensory organ development	0.0081783	18	ac; sc; ase; sdk; trr; arm; pn; temp; boi; sgg; rst; kirre; N; Rala; ec; Fas2; norpA; bi; peb; ctp; RhoGAP5A; lin-52; GAA1; rux; Pink1; sn; oc; Lim1; Moe; AP-1gamma; lz; sev; dsh; hop; Amun; fw; LIMK1; NnaD; shtd; sd; Chc; Stim; exd; caz; mbt; f; B-H2; B-H1; Vps4; upd1; Bx; Rip11; Hs3st-B; CG14204; dome; Mer; AP-1-2beta; run; CG1518; S6kII; l(2)gl; smo; al; ebi; ex; cbt; ush; Pph13; ds; S; ast; a…
GO:0007275	0.0059239	2.94876	6.59744	13	3233	multicellular organism development	0.00829144	18	G9a; CG13377; cin; ewg; y; ac; sc; l(1)sc; pcl; ase; CG18273; svr; elav; Appl; vnd; CG13366; Dredd; Roc1a; SkpA; sdk; tw; MED22; CG3703; CDC45L; CG11382; CG11398; CG3638; DAAM; CG11417; CG11448; pck; rush; dor; hfw; a6; trr; arm; Edem1; Hr4; usp; moody; CG4061; CG16903; Unc-76; ph-p; pn; Nmd3; Vinc; kz; crn; temp; Raf; PsGEF; gt; boi; egh; PI4KIIIalpha; sgg; per; CG2681; crm; rst; kirre; N; dnc; …
GO:0001667	0.00612477	8.98208	0.377521	3	185	ameboidal-type cell migration	0.00829144	18	dor; usp; Raf; egh; Tsp3A; N; Rala; brn; spoon; sqh; Dsor1; Ptpmeg2; spri; dsh; hop; Evi5; hep; mew; sl; mthl1; if; baz; par-6; upd1; phm; Pvf1; dome; fog; kis; ex; CG4552; cpb; aop; Rab5; dpp; Hrs; Sec5; Tsp26A; stai; cup; Hrb27C; Pvr; grk; tai; Stam; ab; salm; CG6509; Rab3-GAP; Ced-12; bun; kuz; esg; Gli; BicC; GMF; Mhc; kel; Socs36E; tj; spi; Hakai; EcR; jing; ptc; Vang; Rme-8; pyr; jeb; Sin3A…
GO:0090130	0.00612477	8.98208	0.377521	3	185	tissue migration	0.00829144	18	dor; usp; Raf; egh; Tsp3A; N; Rala; brn; spoon; sqh; Dsor1; Ptpmeg2; spri; dsh; hop; Evi5; hep; mew; sl; mthl1; if; baz; par-6; upd1; phm; Pvf1; dome; fog; kis; ex; CG4552; cpb; aop; Rab5; dpp; Hrs; Sec5; Tsp26A; stai; cup; Hrb27C; Pvr; grk; tai; Stam; ab; salm; CG6509; Rab3-GAP; Ced-12; bun; kuz; esg; Gli; BicC; GMF; Mhc; kel; Socs36E; tj; spi; Hakai; EcR; jing; ptc; Vang; Rme-8; pyr; jeb; Sin3A…
GO:0035295	0.00621858	4.23029	1.73048	6	848	tube development	0.00829144	18	G9a; ewg; ac; sc; l(1)sc; pcl; ase; svr; CG13366; CG11382; arm; crn; Raf; boi; sgg; N; Myc; VhaAC39-1; Fas2; bi; CHOp24; peb; pon; ctp; ovo; RhoGAP5A; Act5C; CG5966; rux; sqh; dx; Nf-YC; Atx-1; Inx2; brk; Dok; CHES-1-like; sn; fs(1)h; Smox; Nrg; Caf1-180; oc; Lim1; Moe; Bx42; Zpr1; lz; btd; Sp1; Idgf4; CG15312; CG15309; sisA; dsh; hop; dlg1; Drak; bif; Amun; dy; Karl; pot; fw; LIMK1; Smr; ade5; C…
GO:0010628	0.00648778	6.08327	0.761165	4	373	positive regulation of gene expression	0.00847383	18	ac; sc; l(1)sc; ase; vnd; trr; arm; usp; CG3071; z; N; Myc; tyf; rb; Bteb2; ovo; mof; MCTS1; Rpt4; NELF-B; fs(1)h; CG10555; Trf2; org-1; oc; Lim1; HP1b; Bap111; lz; btd; sisA; Met; Brms1; hep; Bap60; sno; gce; sd; Myb; exd; disco; Nup153; DENR; e(y)1; Ada3; Taf8; CrebB; Bx; fu; CoRest; e(y)3; vfl; fd19B; run; cbt; Pph13; Saf6; Axud1; Mad; odd; bowl; slp1; slp2; mxt; Cf2; H15; mid; tomb; Daxx; eya…
GO:0050896	0.00700198	2.92446	5.90566	12	2894	response to stimulus	0.00896254	18	G9a; CG13377; ewg; CG13375; Or1a; ac; pcl; Appl; Dredd; Roc1a; SkpA; fz3; Rbf; mus81; CDC45L; CG11403; DAAM; ssx; Ns3; Rab27; Nmdar2; inc; dor; hfw; CG14798; Adar; CG14812; Pex5; CG14803; Pgam5; trr; arm; Edem1; Rbcn-3B; Ocrl; Hr4; usp; CG4325; moody; CG4313; Sik2; CG4061; ph-p; CG3630; pn; Nmd3; pcx; Or2a; CG3071; Ilp6; Raf; PsGEF; gt; tko; boi; Pdfr; egh; Tsp3A; Seipin; brv3; PI4KIIIalpha; sgg;…
GO:0090304	0.00724257	3.21862	3.68338	9	1805	nucleic acid metabolic process	0.00908871	18	ewg; ac; sc; l(1)sc; ase; elav; vnd; l(1)1Bi; su(sable); Hmt4-20; SkpA; Rbf; MED22; mus81; TfIIA-S-2; CDC45L; su(w[a]); CG11403; CG11418; Lrpprc2; mei-38; sta; Adar; MED18; CG14803; trr; arm; mip130; Hr4; usp; CG4061; CG4045; CG16903; ph-p; pn; crn; CG3071; Raf; gt; z; Klp3A; sgg; CG2652; per; CG2685; fs(1)Ya; crm; CG12498; N; Myc; CG10802; Parg; Mnt; fd3F; CG43689; CG6379; Xpac; Tip60; mei-9; CG…
GO:0060429	0.00765369	3.64226	2.39777	7	1175	epithelium development	0.00941992	18	G9a; ewg; ac; sc; l(1)sc; pcl; ase; svr; CG13366; Rbf; CG11382; dor; arm; mip130; usp; ph-p; crn; Raf; boi; egh; Tsp3A; sgg; fs(1)Yb; N; Myc; Rala; ec; VhaAC39-1; brn; Fas2; CG15571; Femcoat; Muc4B; bi; CHOp24; peb; pon; ctp; ovo; spoon; RhoGAP5A; CG5966; rux; sqh; Rpt4; dx; pigs; Cdc7; Mcm6; Nf-YC; xit; Atx-1; Inx2; nullo; brk; Dok; CHES-1-like; dec-1; sn; fs(1)h; cyr; Smox; Traf6; Cp7Fb; Cp7Fc;…
GO:0009891	0.00813223	5.68574	0.812181	4	398	positive regulation of biosynthetic process	0.00954557	18	ac; sc; l(1)sc; ase; vnd; Dredd; trr; arm; usp; pn; CG3071; z; Pdfr; N; Myc; tyf; Bteb2; ovo; mof; MCTS1; Rpt4; Cdc7; NELF-B; fs(1)h; CG10555; Trf2; org-1; otu; oc; Lim1; HP1b; fh; Bap111; lz; btd; sesB; sisA; PGRP-SA; Met; Brms1; hep; Bap60; sno; gce; sd; Myb; exd; disco; Nup153; DENR; e(y)1; Ada3; Taf8; CrebB; psh; Bx; fu; CoRest; e(y)3; vfl; amn; fd19B; run; Ntf-2; Dd; cbt; Ptth; Pph13; Saf6; …
GO:0031328	0.00813223	5.68574	0.812181	4	398	positive regulation of cellular biosynthetic process	0.00954557	18	ac; sc; l(1)sc; ase; vnd; Dredd; trr; arm; usp; pn; CG3071; z; Pdfr; N; Myc; tyf; Bteb2; ovo; mof; MCTS1; Rpt4; Cdc7; NELF-B; fs(1)h; CG10555; Trf2; org-1; otu; oc; Lim1; HP1b; fh; Bap111; lz; btd; sesB; sisA; PGRP-SA; Met; Brms1; hep; Bap60; sno; gce; sd; Myb; exd; disco; Nup153; DENR; e(y)1; Ada3; Taf8; CrebB; psh; Bx; fu; CoRest; e(y)3; vfl; amn; fd19B; run; Ntf-2; Dd; cbt; Ptth; Pph13; Saf6; …
GO:0051173	0.00820322	5.67089	0.814222	4	399	positive regulation of nitrogen compound metabolic process	0.00954557	18	ac; sc; l(1)sc; ase; vnd; Dredd; trr; arm; usp; pn; CG3071; z; Pdfr; N; Myc; tyf; Bteb2; ovo; mof; MCTS1; Rpt4; Cdc7; NELF-B; fs(1)h; CG10555; Trf2; org-1; otu; oc; Lim1; HP1b; Bap111; lz; btd; sesB; sisA; PGRP-SA; Met; Upf1; Tis11; Brms1; hep; Bap60; sno; gce; sd; Myb; exd; disco; Nup153; DENR; e(y)1; Ada3; Taf8; CrebB; psh; Bx; fu; CoRest; e(y)3; vfl; amn; fd19B; run; Ntf-2; cbt; Pph13; Saf6; A…
GO:0007166	0.00848779	4.5445	1.30194	5	638	cell surface receptor signaling pathway	0.00959192	18	ewg; pcl; Dredd; Roc1a; SkpA; fz3; Nmdar2; dor; trr; arm; Rbcn-3B; pcx; Ilp6; Raf; gt; boi; Pdfr; Tsp3A; sgg; N; Myc; Ilp7; Rala; VhaAC39-1; Fas2; CHOp24; peb; CG4096; Rbcn-3A; dx; pigs; shf; Nf-YC; fz4; brk; Nek2; CG10777; Smox; Traf6; Nrg; spirit; sev; dsh; PGRP-SA; gd; tsg; CkIalpha; Smr; Brms1; hec; lic; sno; Neto; Nup93-1; pdgy; hiw; opm; Rab3-GEF; sog; PGRP-LE; Chc; tay; CG8909; sl; Nup153;…
GO:0040011	0.00854281	4.53695	1.30398	5	639	locomotion	0.00959192	18	DAAM; dor; usp; crn; Raf; gt; Pdfr; egh; Tsp3A; w; N; Gas8; Rala; brn; Fas2; norpA; Torsin; CG44774; Ptp4E; spoon; raptor; sqh; pod1; iav; Nf-YC; sn; Tbh; Smox; Nrg; Ppt1; Moe; rdgA; fend; Dsor1; Ptpmeg2; spri; sesB; dsh; hop; dlg1; Evi5; Ptp10D; bif; Ten-a; hep; mew; Neto; CG11178; Clic; NetA; NetB; hiw; Scamp; sl; nonA; mthl1; if; baz; beta-Spec; par-6; CG6867; Dhc16F; upd1; Wnt5; wgn; phm; Pvf…
GO:0019222	0.00876017	3.11119	3.79154	9	1858	regulation of metabolic process	0.00962829	18	G9a; ewg; ac; sc; l(1)sc; ase; elav; vnd; Dredd; su(sable); Hmt4-20; SkpA; Rbf; MED22; TfIIA-S-2; CG32812; Lrpprc2; Adar; CG14812; MED18; trr; arm; mip130; Ocrl; Hr4; usp; CG4325; CG4025; CG16903; ph-p; Pgd; pn; msta; crn; CG3071; Raf; gt; z; Pdfr; Seipin; sgg; CG2652; per; eIF2B-beta; crm; N; Myc; Parg; Mnt; Rala; fd3F; CG43689; Tip60; tyf; CG2982; bi; rb; peb; HLH4C; Torsin; Bteb2; CG4041; ovo;…
GO:0009887	0.00928237	3.8643	1.88148	6	922	organ morphogenesis	0.00962829	18	ewg; ac; sc; pcl; ase; svr; CG13366; sdk; CG11382; trr; arm; pn; Raf; boi; sgg; rst; kirre; N; Myc; Rala; ec; Fas2; norpA; bi; peb; ctp; ovo; RhoGAP5A; GAA1; CG5966; rux; sqh; dx; Atx-1; brk; Dok; sn; fs(1)h; Smox; Nrg; oc; Lim1; Moe; lz; btd; Sp1; CG15312; CG15309; sev; dsh; hop; dlg1; Drak; bif; dy; Karl; pot; fw; Mks1; CG43921; LIMK1; Smr; ade5; CG12717; hep; sno; mew; up; BthD; NFAT; l(1)G000…
GO:0009966	0.00951692	4.41226	1.33867	5	656	regulation of signal transduction	0.00962829	18	ewg; Roc1a; SkpA; dor; CG14812; trr; Rbcn-3B; CG3630; pn; Raf; PsGEF; boi; Tsp3A; sgg; N; dnc; Myc; Rala; VhaAC39-1; Fas2; norpA; CHOp24; peb; RhoGAP5A; CG4096; CG5937; Rbcn-3A; dx; pigs; CG3198; shf; Nf-YC; brk; Nek2; CG10777; Ubr3; Traf6; Corp; spirit; Crag; rdgA; Ir8a; Dsor1; CG34408; CG15306; spri; CG1657; dsh; hop; PGRP-SA; tsg; CkIalpha; Smr; Brms1; rad; hep; lic; Fer3HCH; Neto; NFAT; rdgB;…
GO:0010468	0.00961256	3.47446	2.50184	7	1226	regulation of gene expression	0.00962829	18	G9a; ewg; ac; sc; l(1)sc; ase; elav; vnd; su(sable); Hmt4-20; Rbf; MED22; TfIIA-S-2; Lrpprc2; Adar; MED18; trr; arm; mip130; Hr4; usp; CG16903; ph-p; msta; crn; CG3071; Raf; gt; z; sgg; CG2652; per; eIF2B-beta; crm; N; Myc; Parg; Mnt; fd3F; CG43689; Tip60; tyf; CG2982; bi; rb; peb; HLH4C; Bteb2; ovo; snf; Vsx2; Vsx1; CG4119; lin-52; mof; MCTS1; Rpt4; Nf-YC; CG14431; brk; CHES-1-like; Hira; NELF-B…
GO:0048754	0.00962829	14.8404	0.148968	2	73	branching morphogenesis of an epithelial tube	0.00962829	18	arm; Raf; VhaAC39-1; Zpr1; baz; par-6; Cdc42; dpp; Sec5; ed; Lam; wg; esg; Syx7; shot; Rho1; grh; shg; apt; bs; sty; ago; Membrin; sfl; sgl; foi; rhea; trn; caps; btl; TSG101; Mkp3; Hph; pyd; Ras85D; dmt; wkd; mbo; Nsf2; stumps; put; Cctgamma; GckIII; bnl; Hs6st; dnd; VhaAC39-2; pnt; dysf; Vha100-1; hdc; wts; gammaCOP; e(r); tlr-2; ru; Nckx30C; cv-2; stout; Reph; l(2)k06107; l(2)Ta; Gr98c; CG3202…
GO:0060446	0.00962829	14.8404	0.148968	2	73	branching involved in open tracheal system development	0.00962829	18	arm; Raf; VhaAC39-1; Zpr1; baz; par-6; Cdc42; dpp; Sec5; ed; Lam; wg; esg; Syx7; shot; Rho1; grh; shg; apt; bs; sty; ago; Membrin; sfl; sgl; foi; rhea; trn; caps; btl; TSG101; Mkp3; Hph; pyd; Ras85D; dmt; wkd; mbo; Nsf2; stumps; put; Cctgamma; GckIII; bnl; Hs6st; dnd; VhaAC39-2; pnt; dysf; Vha100-1; hdc; wts; gammaCOP; e(r); tlr-2; ru; Nckx30C; cv-2; stout; Reph; l(2)k06107; l(2)Ta; Gr98c; CG3202…
GO:0061138	0.00962829	14.8404	0.148968	2	73	morphogenesis of a branching epithelium	0.00962829	18	arm; Raf; VhaAC39-1; Zpr1; baz; par-6; Cdc42; dpp; Sec5; ed; Lam; wg; esg; Syx7; shot; Rho1; grh; shg; apt; bs; sty; ago; Membrin; sfl; sgl; foi; rhea; trn; caps; btl; TSG101; Mkp3; Hph; pyd; Ras85D; dmt; wkd; mbo; Nsf2; stumps; put; Cctgamma; GckIII; bnl; Hs6st; dnd; VhaAC39-2; pnt; dysf; Vha100-1; hdc; wts; gammaCOP; e(r); tlr-2; ru; Nckx30C; cv-2; stout; Reph; l(2)k06107; l(2)Ta; Gr98c; CG3202…
GO:0006336	3.44672e-06	1414.44	0.00313947	2	5	DNA replication-independent nucleosome assembly	7.58278e-05	19	Hira; HipHop; cal1; XNP; tRNA:G3:35Be
GO:0034724	3.44672e-06	1414.44	0.00313947	2	5	DNA replication-independent nucleosome organization	7.58278e-05	19	Hira; HipHop; cal1; XNP; tRNA:G3:35Be
GO:0034508	7.23357e-06	848.533	0.00439526	2	7	centromere complex assembly	0.000106092	19	cid; mars; HipHop; Spc105R; Cenp-C; cal1; tRNA:G3:35Be
GO:0043486	0.000180393	136.581	0.0207205	2	33	histone exchange	0.00198432	19	Tip60; Hira; Ing3; Chd1; Gas41; YL-1; ProtA; ProtB; Nipped-A; MrgBP; E(Pc); Bap55; P32; snky; HipHop; rept; Mst77F; MRG15; cal1; yem; Brd8; Vha68-1; l(1)adl1; Spt5; CG31286; tRNA:G3:35Be; Mst77Y-7; Mst77Y-8; Su(E1)-A; Pzl; PRY; WDY; CCY
GO:0043044	0.000252688	114.378	0.0244879	2	39	ATP-dependent chromatin remodeling	0.00222366	19	Tip60; Hira; Ing3; Chd1; Gas41; YL-1; ProtA; ProtB; Nipped-A; MrgBP; E(Pc); tou; Iswi; Bap55; P32; snky; brm; HipHop; rept; Mst77F; Snr1; CtBP; MRG15; mor; cal1; yem; Brd8; Vha68-1; l(1)adl1; Spt5; CG31286; tRNA:G3:35Be; Mst77Y-7; Mst77Y-8; Su(E1)-A; Pzl; PRY; WDY; CCY
GO:0051276	0.000473721	17.8358	0.426968	4	680	chromosome organization	0.00327925	19	G9a; Hmt4-20; SkpA; CG3708; CDC45L; CG11412; trr; ph-p; wapl; z; sgg; fs(1)Ya; CG12498; Parg; Tip60; CG2982; spoon; Sirt4; CG4078; mof; Act5C; Btnd; Top3beta; APC7; Cdc7; Hira; otu; Trf4-1; Caf1-180; Moe; HP1b; APC4; Bap111; His3.3B; Cfp1; Hmr; Klp10A; Pa1; Kmn1; Chrac-16; Usp7; Bap60; HDAC4; Set2; Ndc80; Lig4; mamo; Top1; HDAC6; Arp6; Myb; mei-41; SMC3; Nup153; corolla; e(y)1; Spt7; Arp8; Ada3; …
GO:0071822	0.000552837	17.0866	0.444549	4	708	protein complex subunit organization	0.00327925	19	RpL22; CG3708; DAAM; mei-38; sta; inc; dor; mip130; Actn; PsGEF; Klp3A; eIF3ga; PI4KIIIalpha; sgg; N; Vap-33A; cib; dgt4; Tip60; ctp; spoon; RpL35; sqh; Spx; swa; RpL7A; RpL17; Hira; CG10932; RpS6; sn; Caf1-180; Moe; Rbm13; rdgA; CG7033; AP-1gamma; Hk; feo; Klp10A; Dlic; dsh; nod; wisp; Chrac-16; Sec16; Tomosyn; hep; CG12096; mew; Rbp1-like; up; Ndc80; Nup93-1; eag; CG9065; CG9072; Grip128; Tcp-1…
GO:1902589	0.000596228	13.926	0.857703	5	1366	single-organism organelle organization	0.00327925	19	G9a; ase; CG17778; CG13366; Hmt4-20; SkpA; RpL22; tw; Sec22; MED22; mus81; CDC45L; DAAM; CG11412; Lrpprc2; mei-38; sta; dor; CG14798; Scgdelta; Pex5; trr; arm; mip130; Ocrl; Actn; moody; ph-p; wapl; Vinc; crn; PsGEF; egh; Klp3A; eIF3ga; PI4KIIIalpha; sgg; fs(1)Ya; ttm50; CG12498; N; ng4; Parg; Vap-33A; cib; dgt4; Tip60; mei-9; CG2982; ctp; Cdk7; dhd; spoon; Sirt4; RpL35; CG4078; mof; rux; Btnd; s…
GO:0022008	0.000799769	12.9791	0.912958	5	1454	neurogenesis	0.00375026	19	G9a; ac; sc; l(1)sc; pcl; ase; CG18273; Appl; vnd; Dredd; Roc1a; SkpA; sdk; MED22; CG3703; CDC45L; CG11398; DAAM; CG11417; CG11448; pck; rush; arm; usp; moody; CG4061; CG16903; Unc-76; ph-p; Nmd3; Vinc; kz; crn; Raf; gt; boi; egh; rst; N; dnc; Myc; CG2875; Mnt; Rala; fd3F; CG2901; lva; Fas2; CG3527; peb; pon; ctp; Ptp4E; ovo; Sas10; Mcm3; GAA1; raptor; sqh; Spx; Rpt4; CG3224; shf; pod1; Nf-YC; cm…
GO:0034622	0.000852331	22.9796	0.205321	3	327	cellular macromolecular complex assembly	0.00375026	19	CG3708; DAAM; sta; dor; PsGEF; Vap-33A; Mcm3; spoon; sqh; CG3198; Mcm6; Hira; Caf1-180; AP-1gamma; nod; Tomosyn; CG12096; Rbp1-like; CG9065; CG9072; Grip128; ND-20; U2af50; eIF-2alpha; Arp2; Arpc3B; pcm; ND-18; Grip84; car; Cdc42; COX6B; l(2)gl; cpb; TBCD; Sec24CD; Atxn7; Arpc5; Hrs; gammaTub23C; msl-2; capu; mxt; Scox; tkv; CG31648; chic; Arpc4; x16; r2d2; CG7102; Btk29A; Srp54; Pen; CG4908; me3…
GO:0006461	0.00131824	19.6647	0.2386	3	380	protein complex assembly	0.00454899	19	CG3708; DAAM; inc; dor; mip130; PsGEF; Klp3A; Vap-33A; spoon; sqh; Hira; Caf1-180; CG7033; AP-1gamma; Hk; Klp10A; nod; wisp; Sec16; Tomosyn; CG12096; Rbp1-like; Ndc80; eag; CG9065; CG9072; Grip128; Tcp-1zeta; Myb; ND-20; Arp2; Arpc3B; Sh; ND-18; Grip84; car; Cdc42; COX6B; mst; l(2)gl; cpb; TBCD; sau; Sec24CD; Atxn7; Arpc5; Hrs; gammaTub23C; Shaw; capu; Scox; tkv; CG31648; chic; ifc; Arpc4; Wee1; …
GO:0070271	0.00133842	19.5578	0.239856	3	382	protein complex biogenesis	0.00454899	19	CG3708; DAAM; inc; dor; mip130; PsGEF; Klp3A; Vap-33A; spoon; sqh; Hira; Caf1-180; CG7033; AP-1gamma; Hk; Klp10A; nod; wisp; Sec16; Tomosyn; CG12096; Rbp1-like; Ndc80; eag; CG9065; CG9072; Grip128; Tcp-1zeta; Myb; ND-20; Arp2; Arpc3B; Sh; ND-18; Grip84; car; Cdc42; COX6B; mst; l(2)gl; cpb; TBCD; sau; Sec24CD; Atxn7; Arpc5; Hrs; gammaTub23C; Shaw; capu; Scox; tkv; CG31648; chic; ifc; Arpc4; Wee1; …
GO:0006334	0.00134402	47.8977	0.0565105	2	90	nucleosome assembly	0.00454899	19	CG3708; Hira; Caf1-180; Df31; Caf1-105; Iswi; P32; Nap1; enok; HipHop; asf1; His4r; BigH1; Caf1-55; Set; cal1; XNP; mil; Acf; E(da); His1:CG31617; His2A:CG31618; dtr; CG33082; tRNA:CR32129; tRNA:I:49Fc; 5SrRNA:CR33375; CG9510; His2A:CG33847; tRNA:CR30298; tRNA:I:42A; tRNA:CR31471; 5SrRNA:CR33398; CG33768; CheA84a; tRNA:G3:53E; 5SrRNA:CR33449; His1:CG33834; His1:CG33849; CG33645; CG33796; tRNA:CR3…
GO:0007399	0.00162671	10.9054	1.06302	5	1693	nervous system development	0.00463163	19	G9a; CG13377; ewg; ac; sc; l(1)sc; pcl; ase; CG18273; elav; Appl; vnd; Dredd; Roc1a; SkpA; sdk; MED22; CG3703; CDC45L; CG11398; CG3638; DAAM; CG11417; CG11448; pck; rush; arm; usp; moody; CG4061; CG16903; Unc-76; ph-p; Nmd3; Vinc; kz; crn; Raf; PsGEF; gt; boi; egh; PI4KIIIalpha; sgg; rst; N; dnc; Myc; CG2875; Mnt; Rala; fd3F; CG2901; Vap-33A; lva; cib; Tip60; Fas2; CG3527; peb; pon; ctp; Ptp4E; o…
GO:0000070	0.00165593	42.9762	0.0627894	2	100	mitotic sister chromatid segregation	0.00463163	19	ph-p; sgg; APC7; Moe; APC4; Hmr; Klp10A; Kmn1; Ndc80; SMC3; mst; gammaTub23C; toc; CG3326; Spindly; Bub1; Cap-D3; SA; Nuf2; Cks30A; pim; aurB; aub; Orc5; glu; Top2; barr; neb; Cdc23; BubR1; CG15237; Mad1; Mtor; Cap-G; cid; Su(var)2-HP2; SMC2; Lhr; APC10; thr; prod; Nnf1a; CycB; Klp59C; Slik; RfC4; Dhc64C; Sse; mad2; Rcc1; Mis12; eco; nudE; CycA; RecQ5; Rpn10; Chro; corto; alphaTub84B; Cenp-C; dmt…
GO:0006338	0.00172209	42.11	0.0640452	2	102	chromatin remodeling	0.00463163	19	Tip60; Act5C; Hira; HP1b; Bap111; Chrac-16; Bap60; Top1; Arp6; Nup153; Arp8; Ada3; Ing3; Hers; Chd1; okr; Hel25E; Gas41; Atac1; Su(var)205; D12; YL-1; ProtA; ProtB; NC2beta; Atac2; Nipped-A; CG10395; mle; MrgBP; E(Pc); tou; Mtor; Iswi; Psc; Su(var)2-HP2; Bap55; P32; Dp1; DMAP1; Sgf29; Fmr1; Nap1; Nurf-38; Atf-2; Atac3; CG15812; tna; Gcn5; snky; brm; HipHop; rept; Chd3; ash1; Mi-2; Mst77F; Snr1; A…
GO:0031497	0.00178949	41.2778	0.065301	2	104	chromatin assembly	0.00463163	19	CG3708; Hira; Caf1-180; HP1b; Bap60; Su(var)205; Df31; mle; Caf1-105; Iswi; Su(var)2-HP2; P32; Dp1; Fmr1; Nap1; enok; Atf-2; HipHop; asf1; Su(var)3-9; Su(var)3-7; His4r; BigH1; Caf1-55; Set; cal1; Mekk1; XNP; mil; Nlp; Acf; E(da); l(3)88Ad; His1:CG31617; His2A:CG31618; dtr; CG33082; CG33269; tRNA:CR32129; tRNA:I:49Fc; 5SrRNA:CR33375; CG9510; His2A:CG33847; tRNA:CR30298; tRNA:I:42A; tRNA:CR31471; …
GO:0000819	0.00218252	37.2271	0.0722078	2	115	sister chromatid segregation	0.00499819	19	ph-p; wapl; sgg; APC7; Trf4-1; Moe; APC4; Hmr; Klp10A; Kmn1; Ndc80; SMC3; mst; gammaTub23C; toc; CG3326; Spindly; Bub1; Cap-D3; SA; Nuf2; aust; Cks30A; pim; aurB; aub; Orc5; glu; Top2; barr; neb; Cdc23; BubR1; CG15237; Incenp; Mad1; Mtor; pds5; Cap-G; cid; Su(var)2-HP2; SMC2; Lhr; APC10; thr; prod; Nnf1a; mei-S332; CycB; Klp59C; ord; Slik; RfC4; Dhc64C; Sse; mad2; Rcc1; Mis12; eco; Klp67A; RasGAP…
GO:0065004	0.00218252	37.2271	0.0722078	2	115	protein-DNA complex assembly	0.00499819	19	CG3708; Mcm3; Mcm6; Hira; Caf1-180; msl-2; NC2beta; msl-1; Mcm10; Df31; mle; Pbp49; Caf1-105; Iswi; cid; mars; P32; NC2alpha; Nap1; enok; Cdc6; Mcm7; HipHop; asf1; Spc105R; Pbp95; Mcm2; Cenp-C; M1BP; TAF1B; Mcm5; His4r; BigH1; Caf1-55; Set; Pbp45; cal1; XNP; mil; Acf; E(da); clt; His1:CG31617; His2A:CG31618; dtr; CG33082; CG33226; tRNA:CR32129; tRNA:I:49Fc; 5SrRNA:CR33375; CG9510; His2A:CG33847; …
GO:0065003	0.0022719	16.1539	0.288203	3	459	macromolecular complex assembly	0.00499819	19	CG3708; DAAM; sta; inc; dor; mip130; PsGEF; Klp3A; Vap-33A; Mcm3; spoon; sqh; CG3198; Mcm6; Hira; Caf1-180; HP1b; CG7033; AP-1gamma; Hk; Klp10A; nod; wisp; Sec16; Tomosyn; Bap60; CG12096; Rbp1-like; Ndc80; eag; CG9065; CG9072; Grip128; Tcp-1zeta; Myb; ND-20; U2af50; eIF-2alpha; Arp2; Arpc3B; Sh; pcm; ND-18; Grip84; car; Cdc42; COX6B; mst; l(2)gl; cpb; TBCD; sau; Sec24CD; Atxn7; Arpc5; Hrs; gammaT…
GO:0034728	0.00253194	34.4563	0.0778589	2	124	nucleosome organization	0.00530501	19	CG3708; Tip60; Hira; Caf1-180; Chrac-16; Ing3; Chd1; Gas41; YL-1; ProtA; ProtB; NC2beta; Df31; Nipped-A; MrgBP; Caf1-105; E(Pc); Iswi; Bap55; P32; Nap1; enok; Nurf-38; snky; HipHop; rept; Chd3; asf1; Mi-2; Mst77F; His4r; BigH1; Caf1-55; Set; MRG15; cal1; XNP; mil; yem; Brd8; Nlp; Acf; E(da); Vha68-1; l(1)adl1; Spt5; CG31286; His1:CG31617; His2A:CG31618; dtr; CG33082; tRNA:CR32129; tRNA:I:49Fc; 5S…
GO:0006333	0.00303639	31.3408	0.0853936	2	136	chromatin assembly or disassembly	0.00557847	19	CG3708; fs(1)Ya; Hira; Caf1-180; HP1b; His3.3B; Bap60; His3.3A; Su(var)205; Df31; mle; Caf1-105; Iswi; cid; Su(var)2-HP2; P32; Dp1; Fmr1; Ssrp; Nap1; enok; Atf-2; dre4; HipHop; Chd3; asf1; Su(var)3-9; Su(var)3-7; His4r; BigH1; Caf1-55; Set; cal1; Mekk1; XNP; His2Av; mil; Nlp; Acf; E(da); l(3)88Ad; ms(1)19Fa; His1:CG31617; His2A:CG31618; dtr; CG33082; CG33199; CG33269; tRNA:CR32129; tRNA:I:49Fc; 5…
GO:0043933	0.00307353	10.4505	0.70073	4	1116	macromolecular complex subunit organization	0.00557847	19	G9a; Hmt4-20; RpL22; CG3708; DAAM; CG11412; mei-38; sta; inc; dor; trr; mip130; Actn; ph-p; PsGEF; z; Klp3A; eIF3ga; PI4KIIIalpha; sgg; fs(1)Ya; CG12498; N; Parg; Vap-33A; cib; dgt4; Tip60; CG2982; ctp; Mcm3; spoon; Sirt4; RpL35; mof; Act5C; Btnd; sqh; Spx; swa; RpL7A; Cdc7; CG3198; Mcm6; RpL17; Hira; CG10932; RpS6; sn; Caf1-180; Moe; Rbm13; rdgA; HP1b; CG7033; AP-1gamma; Bap111; His3.3B; Cfp1; H…
GO:0045850	0.00313602	454.607	0.00313947	1	5	positive regulation of nurse cell apoptotic process	0.00557847	19	Dp; Pi3K59F; Atg1; Atg13; E2f1
GO:0006996	0.00316958	9.20509	1.22879	5	1957	organelle organization	0.00557847	19	G9a; ase; CG17778; CG13366; Hmt4-20; SkpA; RpL22; tw; Sec22; MED22; CG3708; mus81; CDC45L; DAAM; CG11412; Lrpprc2; mei-38; rush; sta; dor; CG14798; Scgdelta; Pex5; Pgam5; Vps26; trr; arm; mip130; Ocrl; Actn; moody; ph-p; wapl; pn; Vinc; pcx; crn; PsGEF; z; egh; Klp3A; eIF3ga; PI4KIIIalpha; sgg; fs(1)Ya; ttm50; CG12498; N; ng4; Parg; Vap-33A; cib; dgt4; Tip60; mei-9; CG2982; rb; ctp; CG4041; Cdk7;…
GO:0071824	0.00392409	27.4074	0.0973236	2	155	protein-DNA complex subunit organization	0.00664078	19	CG3708; Tip60; Mcm3; Mcm6; Hira; Caf1-180; Chrac-16; Ing3; Tfb4; Chd1; msl-2; Gas41; YL-1; ProtA; ProtB; NC2beta; msl-1; Mcm10; Df31; Nipped-A; mle; Pbp49; MrgBP; Caf1-105; E(Pc); Iswi; cid; mars; Tfb1; Bap55; P32; Xpd; NC2alpha; Nap1; enok; Nurf-38; Cdc6; Mcm7; hay; snky; mrn; HipHop; rept; Chd3; asf1; Mi-2; Spc105R; Mst77F; Ssl1; Pbp95; Mcm2; Cenp-C; M1BP; TAF1B; Mcm5; His4r; BigH1; Caf1-55; Se…
GO:0006323	0.0042268	26.3606	0.101091	2	161	DNA packaging	0.00688813	19	SkpA; CG3708; CDC45L; fs(1)Ya; Hira; Caf1-180; HP1b; Bap60; Top1; Myb; mei-41; okr; Psf2; Cap-D3; Su(var)205; aurB; aub; Orc5; ProtA; ProtB; glu; Top2; barr; neb; Mcm10; Df31; mle; Incenp; Su(var)2-10; Caf1-105; Iswi; Cap-G; Su(var)2-HP2; SMC2; P32; Dp1; prod; Topors; Fmr1; Nap1; enok; Atf-2; RfC4; Rcc1; eIF4E-3; HipHop; asf1; Mst77F; corto; Mcm2; HP1e; Mcm5; Su(var)3-9; Su(var)3-7; Orc2; Set8; s…
GO:1904747	0.00438802	303.024	0.00439526	1	7	positive regulation of apoptotic process involved in development	0.00689357	19	Dp; Pi3K59F; Atg1; Dfd; Atg13; E2f1; Amy-p
GO:0071103	0.00486406	24.4873	0.108626	2	173	DNA conformation change	0.00689357	19	SkpA; CG3708; CDC45L; fs(1)Ya; Top3beta; Hira; Caf1-180; HP1b; Bap60; Top1; Myb; mei-41; okr; Psf2; Marcal1; Cap-D3; eIF-4a; Su(var)205; aurB; aub; Orc5; ProtA; ProtB; glu; Top2; Top3alpha; barr; neb; Mcm10; Df31; mle; Incenp; Su(var)2-10; Caf1-105; Iswi; Cap-G; Su(var)2-HP2; SMC2; P32; Dp1; prod; Topors; Fmr1; Nap1; enok; Atf-2; scf; dre4; RfC4; Rcc1; eIF4E-3; HipHop; asf1; Mst77F; Ddx1; CG9791;…
GO:0098813	0.00497437	24.2004	0.109881	2	175	nuclear chromosome segregation	0.00689357	19	mei-38; ph-p; wapl; Klp3A; sgg; mei-9; APC7; hdm; Trf4-1; Moe; APC4; Hmr; Klp10A; Kmn1; nod; bif; Ndc80; mei-41; SMC3; Axs; Fim; corolla; Mer; mst; lwr; Rab5; oaf; gammaTub23C; toc; CG3326; Spindly; Bub1; Cap-D3; cup; cort; SA; Nuf2; aust; Cks30A; pim; aurB; aub; Orc5; Gli; c(2)M; grp; glu; gammaTub37C; RanGAP; Top2; barr; neb; Cdc23; Mcm10; Hr39; BubR1; CG15237; Incenp; Mad1; Mtor; pds5; sca; Ca…
GO:0033554	0.00500994	12.0697	0.380504	3	606	cellular response to stress	0.00689357	19	SkpA; Rbf; mus81; CDC45L; CG11403; Ns3; dor; CG14798; CG14803; Edem1; Hr4; CG4061; Nmd3; CG3071; Raf; sgg; eIF2B-beta; N; Rala; Xpac; Tip60; mei-9; CG3527; peb; TrxT; dhd; Mcm3; XRCC1; CG4078; mof; raptor; Marf; Atg5; Dok; CHES-1-like; Traf6; Trxr-1; Corp; Caf1-180; Ogg1; l(1)G0020; CG7246; Dsor1; Erk7; CG2972; sesB; Imp; Hsp60; Rpt3; RpII215; nod; RPA3; CkIIbeta; Upf1; Chrac-16; Sec16; CkIalpha;…
GO:2000243	0.0050135	259.714	0.00502315	1	8	positive regulation of reproductive process	0.00689357	19	didum; Dp; Pi3K59F; bol; Atg1; Lasp; Atg13; E2f1
GO:0045477	0.00563864	227.232	0.00565105	1	9	regulation of nurse cell apoptotic process	0.00729707	19	Dp; Pi3K59F; Atg1; Atg13; Bruce; slmb; E2f1; Zhr; ogre
GO:0071480	0.00563864	227.232	0.00565105	1	9	cellular response to gamma radiation	0.00729707	19	Utx; Ku80; Ilp8; hid; rpr; Tctp; bet; p38c; tRNA:G3:35Be
GO:0007059	0.00589859	22.1235	0.119928	2	191	chromosome segregation	0.00741537	19	CG17778; mei-38; ph-p; wapl; Klp3A; sgg; mei-9; APC7; hdm; Trf4-1; Moe; APC4; Hmr; Klp10A; Kmn1; nod; bif; Ndc80; Top1; mei-41; SMC3; Axs; Fim; corolla; Mer; mst; lwr; Rab5; oaf; gammaTub23C; toc; CG3326; Spindly; Bub1; Cap-D3; mtm; cup; cort; SA; Nuf2; aust; Cks30A; pim; aurB; aub; Orc5; Gli; c(2)M; grp; glu; gammaTub37C; RanGAP; Top2; barr; neb; Cdc23; Mcm10; Hr39; BubR1; Eb1; CG15237; Incenp; …
GO:0042766	0.00626344	201.968	0.00627894	1	10	nucleosome mobilization	0.00765531	19	Chrac-16; NC2beta; Iswi; Nurf-38; Chd3; Mi-2; Caf1-55; Acf; E(da); tRNA:G3:35Be
GO:0016233	0.00688789	181.757	0.00690684	1	11	telomere capping	0.00777095	19	HP6; mre11; rad50; ver; HipHop; tefu; cav; ms(3)K81; eIF-1A; esp; CG7606
GO:0048015	0.00688789	181.757	0.00690684	1	11	phosphatidylinositol-mediated signaling	0.00777095	19	PI4KIIIalpha; DJ-1alpha; Pi3K59F; Ptp61F; Atg2; Atg18a; Pi3K68D; Atg1; Ide; Pi3K92E; prd1
GO:1904748	0.00688789	181.757	0.00690684	1	11	regulation of apoptotic process involved in development	0.00777095	19	Dp; Pi3K59F; Atg1; Dfd; Atg13; Bruce; slmb; E2f1; Zhr; ogre; Amy-p
GO:0007080	0.007512	165.221	0.00753473	1	12	mitotic metaphase plate congression	0.0082632	19	Kmn1; Ndc80; Nuf2; cid; Nnf1a; Mis12; nudE; Cenp-C; Spc25; l(2)51Da; tara; CG31674
GO:0048017	0.00813576	151.44	0.00816262	1	13	inositol lipid-mediated signaling	0.00873106	19	PI4KIIIalpha; Pld; DJ-1alpha; Pi3K59F; Ptp61F; Atg2; Atg18a; Pi3K68D; Atg1; Ide; Pi3K92E; CG5815; prd1
GO:0030154	0.0091437	6.92162	1.55467	5	2476	cell differentiation	0.00957911	19	G9a; ac; sc; l(1)sc; pcl; ase; CG18273; Appl; vnd; CG13366; Dredd; Roc1a; SkpA; sdk; CG5254; tw; Rbf; MED22; CG3703; CG3690; CDC45L; CG14624; CG11398; DAAM; CG11417; CG11448; pck; rush; dor; Scgdelta; arm; mip130; usp; Actn; moody; CG4061; CG16903; Unc-76; ph-p; Nmd3; Vinc; pcx; kz; crn; Raf; gt; boi; egh; Tsp3A; PI4KIIIalpha; sgg; fs(1)Yb; rst; kirre; N; dnc; Myc; CG2875; Mnt; Rala; fd3F; CG2901…
GO:0071479	0.00938226	129.786	0.00941841	1	15	cellular response to ionizing radiation	0.00959357	19	mof; Dsor1; Pvf1; Utx; Ku80; Tie; Ilp8; hid; rpr; skl; Tctp; Stat92E; bet; p38c; tRNA:G3:35Be
GO:0048731	0.00959357	6.8288	1.57162	5	2503	system development	0.00959357	19	G9a; CG13377; ewg; ac; sc; l(1)sc; pcl; ase; CG18273; svr; elav; Appl; vnd; CG13366; Dredd; Roc1a; SkpA; sdk; tw; MED22; CG3703; CDC45L; CG11382; CG11398; CG3638; DAAM; CG11417; CG11448; pck; rush; trr; arm; usp; moody; CG4061; CG16903; Unc-76; ph-p; pn; Nmd3; Vinc; kz; crn; temp; Raf; PsGEF; gt; boi; egh; PI4KIIIalpha; sgg; rst; kirre; N; dnc; Myc; CG2875; Mnt; Rala; fd3F; CG2901; ec; VhaAC39-1;…
GO:0051301	2.96956e-09	35.246	0.428302	8	321	cell division	2.37565e-07	20	ase; CG17778; dor; Ocrl; Klp3A; sgg; fs(1)Yb; N; dgt4; pon; Act5C; rux; sqh; APC7; nullo; CHES-1-like; Nek2; Moe; APC4; ric8a; feo; sofe; hop; dlg1; dah; Grip128; Myb; Gbeta13F; eas; mei-41; Sep4; baz; par-6; upd1; Mer; Cdc42; pico; Rab35; Sep1; l(2)gl; AP-2alpha; ex; Pex12; mio; sau; dpp; Drp1; lilli; Mad; Cog3; Sec5; Spindly; Gmd; tkv; Bub1; CG7236; chic; eIF-4a; slam; Rca1; cdc14; mtsh; alien;…
GO:0007049	9.36311e-08	17.0441	1.32627	10	994	cell cycle	3.74525e-06	20	ac; sc; ase; CG17778; SkpA; RpL22; Rbf; MED22; mus81; CDC45L; png; mei-38; sta; mip130; Ocrl; CG16903; ph-p; wapl; crn; CG2865; Raf; Klp3A; eIF3ga; sgg; fs(1)Ya; ttm50; N; ng4; Myc; Mnt; dgt4; mei-9; HLH4C; ctp; Cdk7; dhd; Mcm3; RpL35; lin-52; mof; Act5C; rux; CG5921; sqh; Spx; PpV; RpL7A; APC7; pigs; Cdc7; Mcm6; RpL17; nullo; CHES-1-like; NELF-B; CG10932; Nek2; p115; RpS6; hdm; Smox; otu; Trf4-1…
GO:0022402	3.78756e-07	15.8756	1.13547	9	851	cell cycle process	1.01002e-05	20	ase; CG17778; SkpA; RpL22; Rbf; MED22; mus81; CDC45L; mei-38; sta; mip130; Ocrl; ph-p; wapl; crn; Klp3A; eIF3ga; sgg; fs(1)Ya; ttm50; N; ng4; Myc; dgt4; mei-9; ctp; Cdk7; dhd; Mcm3; RpL35; mof; Act5C; rux; CG5921; sqh; Spx; PpV; RpL7A; APC7; pigs; Mcm6; RpL17; nullo; CHES-1-like; NELF-B; CG10932; Nek2; RpS6; hdm; otu; Trf4-1; Caf1-180; Moe; Rbm13; APC4; CG7033; His3.3B; Dsor1; ric8a; Hmr; feo; so…
GO:0000278	6.30203e-07	17.007	0.853936	8	640	mitotic cell cycle	1.26041e-05	20	ac; sc; ase; CG17778; SkpA; RpL22; Rbf; MED22; mus81; CDC45L; png; mei-38; sta; mip130; Ocrl; ph-p; Klp3A; eIF3ga; sgg; fs(1)Ya; ttm50; N; dgt4; mei-9; ctp; Cdk7; Mcm3; RpL35; Act5C; rux; CG5921; sqh; Spx; PpV; RpL7A; APC7; Cdc7; RpL17; CHES-1-like; NELF-B; CG10932; Nek2; RpS6; Smox; Moe; Rbm13; APC4; CG7033; Dsor1; ric8a; PPP4R2r; Hmr; feo; Klp10A; Dlic; dlg1; RpII215; Kmn1; nod; wisp; Aven; Smr…
GO:1903047	3.89795e-06	15.4942	0.743191	7	557	mitotic cell cycle process	6.23672e-05	20	ase; CG17778; SkpA; RpL22; Rbf; MED22; mus81; CDC45L; mei-38; sta; mip130; Ocrl; ph-p; Klp3A; eIF3ga; sgg; fs(1)Ya; ttm50; N; dgt4; mei-9; ctp; Cdk7; Mcm3; RpL35; Act5C; rux; CG5921; sqh; Spx; PpV; RpL7A; APC7; RpL17; CHES-1-like; NELF-B; CG10932; Nek2; RpS6; Moe; Rbm13; APC4; CG7033; Dsor1; ric8a; Hmr; feo; Klp10A; Dlic; dlg1; RpII215; Kmn1; nod; wisp; Aven; REG; Ndc80; jub; shtd; Grip128; mh; T…
GO:0007067	2.03148e-05	19.6654	0.35892	5	269	mitotic nuclear division	0.000270864	20	ase; CG17778; SkpA; MED22; mip130; ph-p; Klp3A; eIF3ga; sgg; fs(1)Ya; ttm50; dgt4; Cdk7; rux; APC7; NELF-B; Nek2; Moe; APC4; CG7033; Hmr; Klp10A; Dlic; Kmn1; Ndc80; jub; shtd; Grip128; mh; Tcp-1zeta; Myb; TH1; mei-41; SMC3; CG8188; Grip84; mst; CG3436; ex; sau; Rab5; gammaTub23C; toc; CG3326; Spindly; Bub1; Cap-D3; eIF-4a; Rca1; Wee1; SA; Nuf2; cdc14; borr; Cks30A; pelo; pim; Grip75; aurB; aub; a…
GO:0022607	0.000166829	8.32411	1.32627	7	994	cellular component assembly	0.00137139	20	ewg; CG13366; SkpA; tw; Rbf; CG3708; DAAM; pck; sta; inc; dor; Scgdelta; arm; mip130; Ocrl; Actn; moody; PsGEF; Klp3A; PI4KIIIalpha; sgg; kirre; N; Vap-33A; Fas2; CG15571; Femcoat; Muc4B; ctp; Bteb2; Mcm3; spoon; raptor; sqh; Top3beta; swa; Pat1; Cdc7; CG3198; Mcm6; C3G; bou; nullo; Hira; dec-1; sn; Cp36; Cp38; Nrg; Crag; Caf1-180; Moe; HP1b; CG7033; AP-1gamma; fh; Hk; sesB; Imp; Myo10A; Klp10A; …
GO:1902589	0.000170847	7.4397	1.82262	8	1366	single-organism organelle organization	0.00137139	20	G9a; ase; CG17778; CG13366; Hmt4-20; SkpA; RpL22; tw; Sec22; MED22; mus81; CDC45L; DAAM; CG11412; Lrpprc2; mei-38; sta; dor; CG14798; Scgdelta; Pex5; trr; arm; mip130; Ocrl; Actn; moody; ph-p; wapl; Vinc; crn; PsGEF; egh; Klp3A; eIF3ga; PI4KIIIalpha; sgg; fs(1)Ya; ttm50; CG12498; N; ng4; Parg; Vap-33A; cib; dgt4; Tip60; mei-9; CG2982; ctp; Cdk7; dhd; spoon; Sirt4; RpL35; CG4078; mof; rux; Btnd; s…
GO:0007052	0.000181756	17.5694	0.297543	4	223	mitotic spindle organization	0.00137139	20	RpL22; mei-38; sta; mip130; Klp3A; eIF3ga; dgt4; RpL35; Spx; RpL7A; RpL17; CG10932; RpS6; Moe; Rbm13; CG7033; feo; Klp10A; Dlic; nod; wisp; Ndc80; Grip128; Tcp-1zeta; Myb; U2af50; eIF-2alpha; SNRPG; RpS5a; Grip84; mst; U2af38; CG7337; sau; Cwc25; gammaTub23C; toc; Dim1; RpL27A; Hel25E; eIF-4a; smt3; snRNP-U1-70K; Nuf2; RpL36A; Pvr; RpS13; borr; Dref; RpL13; RpL7; SmB; Grip75; aurB; RpL9; dgt2; CG…
GO:0007010	0.000186983	9.55697	0.924653	6	693	cytoskeleton organization	0.00137139	20	CG17778; CG13366; SkpA; RpL22; tw; DAAM; mei-38; sta; Scgdelta; arm; mip130; Ocrl; Actn; moody; Vinc; crn; PsGEF; egh; Klp3A; eIF3ga; PI4KIIIalpha; sgg; N; Vap-33A; cib; dgt4; ctp; spoon; RpL35; Act5C; sqh; Spx; swa; RpL7A; RpL17; C3G; pod1; nullo; CG10932; RpS6; sn; Moe; Rbm13; rdgA; CG7033; ric8a; feo; sofe; Klp10A; Dlic; Kap3; dsh; dlg1; nod; Hsc70-3; wisp; LIMK1; hep; mew; Neto; up; Ndc80; da…
GO:0051225	0.000188566	32.636	0.114748	3	86	spindle assembly	0.00137139	20	mip130; Klp3A; CG7033; Klp10A; nod; wisp; Ndc80; Grip128; Tcp-1zeta; Myb; Grip84; mst; sau; gammaTub23C; ifc; Wee1; mtsh; borr; Cks30A; pelo; Grip75; aurB; CG5525; twe; grp; Grip71; gammaTub37C; dia; BubR1; Mob4; Eb1; Incenp; Non1; Mtor; Cct5; Cam; cid; tum; SRPK; Lis-1; CG9975; Prosalpha3; wac; msd5; Non2; pav; mad2; ssp6; pbl; Klp67A; DCTN1-p150; mop; spd-2; polo; Prosbeta7; Tcp-1eta; mgr; Pros…
GO:0065003	0.000256455	11.261	0.612432	5	459	macromolecular complex assembly	0.00156386	20	CG3708; DAAM; sta; inc; dor; mip130; PsGEF; Klp3A; Vap-33A; Mcm3; spoon; sqh; CG3198; Mcm6; Hira; Caf1-180; HP1b; CG7033; AP-1gamma; Hk; Klp10A; nod; wisp; Sec16; Tomosyn; Bap60; CG12096; Rbp1-like; Ndc80; eag; CG9065; CG9072; Grip128; Tcp-1zeta; Myb; ND-20; U2af50; eIF-2alpha; Arp2; Arpc3B; Sh; pcm; ND-18; Grip84; car; Cdc42; COX6B; mst; l(2)gl; cpb; TBCD; sau; Sec24CD; Atxn7; Arpc5; Hrs; gammaT…
GO:0030036	0.000273108	15.7377	0.3309	4	248	actin cytoskeleton organization	0.00156386	20	CG13366; tw; DAAM; Scgdelta; Ocrl; Actn; moody; PsGEF; PI4KIIIalpha; N; cib; ctp; spoon; sqh; swa; C3G; pod1; nullo; sn; Moe; rdgA; dsh; LIMK1; hep; mew; up; dah; Gbeta13F; mei-41; Arp2; if; Arpc3B; f; Vps4; CG6867; wupA; CG6873; RhoGAP18B; Vav; Cdc42; parvin; pico; fliI; l(2)gl; cpb; sau; Arpc5; lilli; capu; ed; chic; mtm; Arpc4; wg; Pvr; Btk29A; SCAR; Ced-12; aret; Sos; Arpc1; ck; BicC; GMF; Mh…
GO:0044085	0.00027412	7.6319	1.43568	7	1076	cellular component biogenesis	0.00156386	20	ewg; CG13366; SkpA; tw; Rbf; CG3708; DAAM; Ns3; pck; sta; inc; dor; Scgdelta; arm; mip130; Ocrl; Actn; moody; Nmd3; CG3071; PsGEF; Klp3A; PI4KIIIalpha; sgg; kirre; N; CG2875; Vap-33A; Fas2; CG15571; Femcoat; Muc4B; CG3527; ctp; Bteb2; Mcm3; spoon; GAA1; raptor; sqh; Top3beta; swa; RpL7A; Pat1; Cdc7; CG3198; Mcm6; C3G; bou; nullo; Hira; dec-1; RpS6; sn; Cp36; Cp38; Nrg; Crag; Caf1-180; CG1789; Moe…
GO:0007051	0.000336741	14.867	0.34958	4	262	spindle organization	0.00156386	20	RpL22; mei-38; sta; mip130; Klp3A; eIF3ga; sgg; dgt4; RpL35; Spx; RpL7A; RpL17; CG10932; RpS6; Moe; Rbm13; CG7033; feo; Klp10A; Dlic; nod; wisp; Ndc80; Grip128; Tcp-1zeta; Myb; U2af50; eIF-2alpha; SNRPG; Axs; RpS5a; Grip84; mst; U2af38; CG7337; sau; Cwc25; gammaTub23C; toc; Dim1; RpL27A; Hel25E; eIF-4a; ifc; Wee1; smt3; snRNP-U1-70K; Nuf2; RpL36A; Pvr; mtsh; RpS13; borr; Cks30A; pelo; Dref; RpL13…
GO:0030029	0.000346631	14.7503	0.352249	4	264	actin filament-based process	0.00156386	20	CG13366; tw; DAAM; Scgdelta; Ocrl; Actn; moody; PsGEF; PI4KIIIalpha; N; cib; ctp; spoon; Mlc-c; sqh; swa; C3G; pod1; xit; nullo; sn; Moe; rdgA; dsh; hop; LIMK1; hep; mew; up; dah; Gbeta13F; mei-41; Arp2; mthl1; if; Arpc3B; f; Vps4; CG6867; wupA; upd1; CG6873; RhoGAP18B; Vav; Cdc42; parvin; pico; fliI; fog; l(2)gl; cpb; sau; Arpc5; lilli; capu; ed; Traf4; chic; mtm; Arpc4; wg; Pvr; Btk29A; SCAR; C…
GO:0006996	0.000350679	6.22331	2.61118	9	1957	organelle organization	0.00156386	20	G9a; ase; CG17778; CG13366; Hmt4-20; SkpA; RpL22; tw; Sec22; MED22; CG3708; mus81; CDC45L; DAAM; CG11412; Lrpprc2; mei-38; rush; sta; dor; CG14798; Scgdelta; Pex5; Pgam5; Vps26; trr; arm; mip130; Ocrl; Actn; moody; ph-p; wapl; pn; Vinc; pcx; crn; PsGEF; z; egh; Klp3A; eIF3ga; PI4KIIIalpha; sgg; fs(1)Ya; ttm50; CG12498; N; ng4; Parg; Vap-33A; cib; dgt4; Tip60; mei-9; CG2982; rb; ctp; CG4041; Cdk7;…
GO:0061640	0.000400359	25.0317	0.148105	3	111	cytoskeleton-dependent cytokinesis	0.00156386	20	Ocrl; Klp3A; Act5C; sqh; nullo; Moe; feo; dah; Grip128; Myb; Sep4; baz; Mer; Rab35; Sep1; sau; Drp1; lilli; Cog3; Sec5; CG7236; chic; slam; mtsh; Toll-4; aust; borr; pim; Grip75; aurB; l(2)gd1; kek1; Syx5; fws; nesd; bru; dia; Nipped-A; Act42A; Incenp; scra; pnut; stmA; shrb; Cap-G; tum; Arf51F; Rho1; Bap55; thr; pAbp; Act57B; CycB; CG30183; tsr; Slik; zip; rho; Pex10; alphaCOP; kst; Rop; pav; Ri…
GO:0000280	0.000414051	10.1025	0.679146	5	509	nuclear division	0.00156386	20	ase; CG17778; SkpA; MED22; mus81; mei-38; mip130; ph-p; wapl; Klp3A; eIF3ga; sgg; fs(1)Ya; ttm50; ng4; dgt4; mei-9; Cdk7; dhd; rux; APC7; NELF-B; Nek2; hdm; Moe; APC4; CG7033; His3.3B; Hmr; Klp10A; Dlic; Kmn1; nod; bif; wisp; Ndc80; jub; mamo; shtd; Grip128; mh; Tcp-1zeta; Myb; TH1; mei-41; Pp2B-14D; SMC3; Axs; Fim; corolla; CG8188; wupA; Grip84; Mer; r-cup; mst; CG3436; ex; lwr; c-cup; mio; sau;…
GO:0000915	0.00041702	80.654	0.0306883	2	23	actomyosin contractile ring assembly	0.00156386	20	Ocrl; nullo; dah; sau; lilli; chic; dia; pnut; Rho1; tsr; pav; pbl; sti; nuf; polo; Det; vib; bond; Sry-alpha; bnk; slm; fer; S(smoDN)189
GO:0044837	0.00041702	80.654	0.0306883	2	23	actomyosin contractile ring organization	0.00156386	20	Ocrl; nullo; dah; sau; lilli; chic; dia; pnut; Rho1; tsr; pav; pbl; sti; nuf; polo; Det; vib; bond; Sry-alpha; bnk; slm; fer; S(smoDN)189
GO:0000910	0.000444175	24.1301	0.153442	3	115	cytokinesis	0.00156386	20	Ocrl; Klp3A; Act5C; sqh; nullo; Moe; feo; sofe; dah; Grip128; Myb; Sep4; baz; Mer; Rab35; Sep1; sau; Drp1; lilli; Cog3; Sec5; CG7236; chic; slam; mtsh; Toll-4; aust; borr; pim; Grip75; aurB; l(2)gd1; kek1; Syx5; fws; nesd; bru; dia; Nipped-A; Act42A; Incenp; scra; pnut; stmA; shrb; Cap-G; tum; Arf51F; Rho1; Bap55; thr; pAbp; Act57B; CycB; CG30183; tsr; Slik; zip; rho; Pex10; alphaCOP; kst; Rop; p…
GO:0000912	0.000454574	76.9818	0.0320226	2	24	assembly of actomyosin apparatus involved in cytokinesis	0.00156386	20	Ocrl; nullo; Moe; dah; sau; lilli; chic; dia; pnut; Rho1; tsr; pav; pbl; sti; nuf; polo; Det; vib; bond; Sry-alpha; bnk; slm; fer; S(smoDN)189
GO:0048285	0.000469159	9.81821	0.697826	5	523	organelle fission	0.00156386	20	ase; CG17778; SkpA; MED22; mus81; mei-38; Pgam5; mip130; ph-p; wapl; Klp3A; eIF3ga; sgg; fs(1)Ya; ttm50; ng4; dgt4; mei-9; Cdk7; dhd; rux; Marf; APC7; Pink1; NELF-B; Nek2; hdm; Moe; APC4; CG7033; His3.3B; Hmr; Klp10A; Dlic; Kmn1; nod; bif; wisp; Ndc80; jub; mamo; shtd; Grip128; mh; Tcp-1zeta; Myb; TH1; mei-41; Pp2B-14D; SMC3; Axs; Fim; corolla; CG8188; CG7772; wupA; Grip84; Mer; r-cup; mst; fog; …
GO:0007017	0.000641776	9.13589	0.747194	5	560	microtubule-based process	0.00205368	20	CG17778; SkpA; RpL22; mei-38; sta; mip130; Unc-76; crn; egh; Klp3A; eIF3ga; sgg; Vap-33A; dgt4; ctp; RpL35; Spx; Marf; RpL7A; Pat1; RpL17; CG10932; RpS6; CG1571; Moe; Rbm13; CG7033; fh; ric8a; feo; sofe; Klp10A; Dlic; Kap3; dlg1; Kmn1; nod; Hsc70-3; wisp; Ndc80; Lsd-2; Grip128; Tcp-1zeta; Chc; Myb; kat80; U2af50; eIF-2alpha; Nup153; SNRPG; Axs; RpS5a; baz; beta-Spec; CG8142; Dhc16F; fu; Grip84; A…
GO:0045931	0.000863502	54.5935	0.0440311	2	33	positive regulation of mitotic cell cycle	0.00265693	20	SkpA; CDC45L; sgg; N; APC7; ben; Myb; Psf2; Cks30A; crol; aret; Su(H); CycE; Cdc23; Mcm10; dpn; nopo; mi; Psf1; Dhc64C; CG10738; pzg; Dl; Cdc16; Sld5; stg; ci; cof; l(3)63Fd; red; mat(2)cell-J; pont; CG34234
GO:0051726	0.00107999	10.7832	0.476336	4	357	regulation of cell cycle	0.00319998	20	ac; sc; ase; SkpA; Rbf; mus81; CDC45L; png; Ocrl; CG16903; CG2865; Raf; Klp3A; eIF3ga; sgg; N; Myc; Mnt; dgt4; mei-9; HLH4C; Cdk7; Mcm3; rux; APC7; pigs; CHES-1-like; Nek2; p115; Smox; otu; Moe; APC4; Dsor1; feo; dlg1; RpII215; Kmn1; Aven; Smr; REG; Neto; ben; Rab3-GEF; CG8128; Myb; mei-41; Rad51D; Grip84; Mer; Alr; fd19B; l(2)gl; smo; ebi; ex; lwr; mio; Hrs; gammaTub23C; Mad; Spindly; slp1; slp2…
GO:0044772	0.00120361	16.934	0.216153	3	162	mitotic cell cycle phase transition	0.00338956	20	SkpA; Rbf; mus81; CDC45L; sgg; N; mei-9; Mcm3; rux; CG5921; PpV; APC7; CHES-1-like; Moe; APC4; Dsor1; RpII215; Aven; REG; Myb; mei-41; CG8188; smo; ex; lwr; Mad; Spindly; Psf2; Bub1; Rca1; Mnn1; cdc14; alien; Cks30A; me31B; Cdk1; mre11; aret; Sos; Su(H); CycE; fzy; grp; Tango6; Top2; spi; Cdc23; E2f2; BubR1; CG15237; Cul1; CSN4; Cul4; CSN7; FANCI; Su(var)2-10; Prp38; Mad1; dap; Rpb5; Mtor; Rcd1; …
GO:0048646	0.00125192	7.81573	0.865945	5	649	anatomical structure formation involved in morphogenesis	0.00338956	20	CG13366; Dredd; tw; Rbf; DAAM; Scgdelta; arm; mip130; Actn; ph-p; egh; PI4KIIIalpha; rst; kirre; N; lva; brn; CG15571; Femcoat; Muc4B; ctp; spoon; Act5C; sqh; Cdc7; Mcm6; C3G; Inx2; nullo; brk; dec-1; Cp7Fb; Cp7Fc; Cp36; Cp38; Moe; Zpr1; lz; btd; feo; Kap3; dsh; hop; CG15721; CG12716; hep; mew; up; Pdcd4; Muc12Ea; NetB; dah; sog; sd; Chc; Myb; exd; kat80; mei-41; rngo; mthl1; sing; if; Nprl2; baz…
GO:0044770	0.0012913	16.5131	0.22149	3	166	cell cycle phase transition	0.00338956	20	SkpA; Rbf; mus81; CDC45L; sgg; N; mei-9; Mcm3; rux; CG5921; PpV; APC7; CHES-1-like; Moe; APC4; Dsor1; RpII215; Aven; REG; Myb; mei-41; CG8188; smo; ex; lwr; Mad; Spindly; Psf2; Bub1; Rca1; Mnn1; cdc14; alien; Cks30A; pelo; me31B; Cdk1; mre11; aret; Sos; Su(H); CycE; twe; fzy; grp; Tango6; Top2; spi; Cdc23; E2f2; BubR1; CG15237; Cul1; CSN4; Cul4; CSN7; FANCI; Su(var)2-10; Prp38; Mad1; dap; Rpb5; M…
GO:0006461	0.00136169	10.1047	0.507025	4	380	protein complex assembly	0.00338956	20	CG3708; DAAM; inc; dor; mip130; PsGEF; Klp3A; Vap-33A; spoon; sqh; Hira; Caf1-180; CG7033; AP-1gamma; Hk; Klp10A; nod; wisp; Sec16; Tomosyn; CG12096; Rbp1-like; Ndc80; eag; CG9065; CG9072; Grip128; Tcp-1zeta; Myb; ND-20; Arp2; Arpc3B; Sh; ND-18; Grip84; car; Cdc42; COX6B; mst; l(2)gl; cpb; TBCD; sau; Sec24CD; Atxn7; Arpc5; Hrs; gammaTub23C; Shaw; capu; Scox; tkv; CG31648; chic; ifc; Arpc4; Wee1; …
GO:0070271	0.00138841	10.0497	0.509693	4	382	protein complex biogenesis	0.00338956	20	CG3708; DAAM; inc; dor; mip130; PsGEF; Klp3A; Vap-33A; spoon; sqh; Hira; Caf1-180; CG7033; AP-1gamma; Hk; Klp10A; nod; wisp; Sec16; Tomosyn; CG12096; Rbp1-like; Ndc80; eag; CG9065; CG9072; Grip128; Tcp-1zeta; Myb; ND-20; Arp2; Arpc3B; Sh; ND-18; Grip84; car; Cdc42; COX6B; mst; l(2)gl; cpb; TBCD; sau; Sec24CD; Atxn7; Arpc5; Hrs; gammaTub23C; Shaw; capu; Scox; tkv; CG31648; chic; ifc; Arpc4; Wee1; …
GO:0032506	0.00139819	42.28	0.0560396	2	42	cytokinetic process	0.00338956	20	Ocrl; nullo; Moe; feo; dah; sau; lilli; chic; slam; fws; bru; dia; scra; pnut; Rho1; tsr; pav; Rint1; pbl; sti; nuf; polo; Sec8; Det; vib; Synd; Rab11; bond; Exo84; Cog7; Sry-alpha; bnk; hdp-b; prd1; slm; E(lz); CG32039; SM2-1; fer; cia; S(smoDN)194; S(smoDN)189
GO:0016043	0.00152742	4.81572	3.89742	10	2921	cellular component organization	0.00359393	20	G9a; ewg; pcl; ase; CG17778; Appl; CG13366; Hmt4-20; SkpA; RpL22; tw; Rbf; Sec22; MED22; CG3708; TRAM; mus81; CG3703; CDC45L; CG11398; DAAM; CG11412; CG11448; Lrpprc2; pck; mei-38; rush; sta; inc; dor; CG14798; Scgdelta; Pex5; Pgam5; Vps26; trr; arm; mip130; Ocrl; usp; Actn; moody; CG4061; ph-p; wapl; pn; Vinc; pcx; crn; PsGEF; gt; z; egh; Klp3A; eIF3ga; PI4KIIIalpha; sgg; fs(1)Yb; fs(1)Ya; ttm50…
GO:0030866	0.00167549	38.4242	0.0613767	2	46	cortical actin cytoskeleton organization	0.0038297	20	Ocrl; moody; nullo; Moe; dah; Cdc42; sau; lilli; chic; mtm; Arpc4; SCAR; Arpc2; dia; pnut; Galphao; Rho1; sktl; tsr; Slik; Rac1; pav; Galphai; pbl; Pi3K68D; sti; nuf; polo; Hem; Sbf; Abi; cv-c; Sra-1; Det; vib; Rab11; bond; loco; Apc2; Sry-alpha; bnk; slm; CG33506; CG40485; fer; S(smoDN)189
GO:0071840	0.00182372	4.68139	3.98281	10	2985	cellular component organization or biogenesis	0.0038573	20	G9a; ewg; pcl; ase; CG17778; Appl; CG13366; Hmt4-20; SkpA; RpL22; tw; Rbf; Sec22; MED22; CG3708; TRAM; mus81; CG3703; CDC45L; CG11398; DAAM; CG11412; CG11448; Lrpprc2; Ns3; pck; mei-38; rush; sta; inc; dor; CG14798; Scgdelta; Pex5; Pgam5; Vps26; trr; arm; mip130; Ocrl; usp; Actn; moody; CG4061; ph-p; wapl; pn; Nmd3; Vinc; pcx; crn; CG3071; PsGEF; gt; z; egh; Klp3A; eIF3ga; PI4KIIIalpha; sgg; fs(1…
GO:0071822	0.00184654	7.12482	0.944667	5	708	protein complex subunit organization	0.0038573	20	RpL22; CG3708; DAAM; mei-38; sta; inc; dor; mip130; Actn; PsGEF; Klp3A; eIF3ga; PI4KIIIalpha; sgg; N; Vap-33A; cib; dgt4; Tip60; ctp; spoon; RpL35; sqh; Spx; swa; RpL7A; RpL17; Hira; CG10932; RpS6; sn; Caf1-180; Moe; Rbm13; rdgA; CG7033; AP-1gamma; Hk; feo; Klp10A; Dlic; dsh; nod; wisp; Chrac-16; Sec16; Tomosyn; hep; CG12096; mew; Rbp1-like; up; Ndc80; Nup93-1; eag; CG9065; CG9072; Grip128; Tcp-1…
GO:0045787	0.00189928	35.9631	0.0653795	2	49	positive regulation of cell cycle	0.0038573	20	SkpA; CDC45L; sgg; N; APC7; otu; ben; Myb; fd19B; slp1; slp2; Psf2; Cks30A; aurB; crol; aret; Su(H); CycE; Cdc23; Mcm10; dpn; nopo; mi; Psf1; fd64A; Dhc64C; DNApol-epsilon58; bol; ssp; CG10738; pzg; Skp2; COX5A; CSN5; Dl; SNF4Agamma; Cdc16; Sld5; stg; ci; cof; l(3)63Fd; l(3)88Ad; red; mat(2)cell-J; pont; CG32017; p38c; CG34234
GO:0070838	0.00197686	35.2111	0.0667138	2	50	divalent metal ion transport	0.0038573	20	brv3; Ca-alpha1T; iav; cac; Stim; nompC; Ent2; Ca-beta; spict; Ca-alpha1D; Trpgamma; Zip42C.1; Zip42C.2; trpl; Trpm; olf186-F; Rgk2; Letm1; pain; pyx; ZnT63C; foi; TrpA1; nan; brv2; Prestin; brv1; Trpml; Psn; ZnT77C; CapaR; SPoCk; CG1090; Itp-r83A; wtrw; CG9297; Calx; Mvl; trp; AdoR; PMCA; Eig82F; Ef1beta; Abd-B; l(3)A519.1F3; Fs(1)10A; CG31883; CG33552; snoRNA:Psi18S-1377b; CG43710
GO:0072511	0.00197686	35.2111	0.0667138	2	50	divalent inorganic cation transport	0.0038573	20	brv3; Ca-alpha1T; iav; cac; Stim; nompC; Ent2; Ca-beta; spict; Ca-alpha1D; Trpgamma; Zip42C.1; Zip42C.2; trpl; Trpm; olf186-F; Rgk2; Letm1; pain; pyx; ZnT63C; foi; TrpA1; nan; brv2; Prestin; brv1; Trpml; Psn; ZnT77C; CapaR; SPoCk; CG1090; Itp-r83A; wtrw; CG9297; Calx; Mvl; trp; AdoR; PMCA; Eig82F; Ef1beta; Abd-B; l(3)A519.1F3; Fs(1)10A; CG31883; CG33552; snoRNA:Psi18S-1377b; CG43710
GO:0090307	0.00197686	35.2111	0.0667138	2	50	mitotic spindle assembly	0.0038573	20	mip130; Klp3A; CG7033; Klp10A; Ndc80; Grip128; Tcp-1zeta; Myb; mst; sau; gammaTub23C; borr; aurB; CG5525; Grip71; BubR1; Mob4; Incenp; Non1; Cct5; Cam; tum; Prosalpha3; msd5; Non2; pav; mad2; ssp6; Klp67A; DCTN1-p150; spd-2; Prosbeta7; Tcp-1eta; mgr; Prosalpha2; Cctgamma; Ns1; Det; Non3; T-cp1; Rpt2; Vps33B; ncd; l(2)51Da; c12.2; Spt5; tara; CG32668; rho-5; Dbp80
GO:0030865	0.0021365	33.7973	0.0693823	2	52	cortical cytoskeleton organization	0.00397489	20	Ocrl; moody; nullo; Moe; dah; Cdc42; sau; lilli; Elp3; chic; mtm; Arpc4; SCAR; Arpc2; dia; pnut; brp; Galphao; Rab3; Rho1; sktl; tsr; Slik; Rac1; pav; Galphai; pbl; Pi3K68D; sti; nuf; polo; Srpk79D; Hem; Sbf; Abi; cv-c; Sra-1; Rbp; Det; vib; Rab11; bond; loco; Apc2; Sry-alpha; bnk; RhoGAP100F; slm; CG33506; CG40485; fer; S(smoDN)189
GO:1902850	0.0021365	33.7973	0.0693823	2	52	microtubule cytoskeleton organization involved in mitosis	0.00397489	20	mip130; Klp3A; CG7033; Klp10A; Ndc80; Grip128; Tcp-1zeta; Myb; mst; sau; gammaTub23C; borr; aurB; CG5525; Grip71; BubR1; Mob4; Incenp; Mad1; Non1; Cct5; Cam; tum; Prosalpha3; msd5; Non2; pav; mad2; ssp6; Klp67A; DCTN1-p150; spd-2; Prosbeta7; Tcp-1eta; mgr; Prosalpha2; Cctgamma; Ns1; Det; Non3; T-cp1; Rpt2; Vps33B; ncd; chb; l(2)51Da; c12.2; Spt5; tara; CG32668; rho-5; Dbp80
GO:0043933	0.00236771	5.70713	1.48905	6	1116	macromolecular complex subunit organization	0.00428916	20	G9a; Hmt4-20; RpL22; CG3708; DAAM; CG11412; mei-38; sta; inc; dor; trr; mip130; Actn; ph-p; PsGEF; z; Klp3A; eIF3ga; PI4KIIIalpha; sgg; fs(1)Ya; CG12498; N; Parg; Vap-33A; cib; dgt4; Tip60; CG2982; ctp; Mcm3; spoon; Sirt4; RpL35; mof; Act5C; Btnd; sqh; Spx; swa; RpL7A; Cdc7; CG3198; Mcm6; RpL17; Hira; CG10932; RpS6; sn; Caf1-180; Moe; Rbm13; rdgA; HP1b; CG7033; AP-1gamma; Bap111; His3.3B; Cfp1; H…
GO:0000226	0.00241265	8.59021	0.592418	4	444	microtubule cytoskeleton organization	0.00428916	20	CG17778; SkpA; RpL22; mei-38; sta; mip130; crn; egh; Klp3A; eIF3ga; sgg; Vap-33A; dgt4; ctp; RpL35; Spx; RpL7A; RpL17; CG10932; RpS6; Moe; Rbm13; CG7033; ric8a; feo; sofe; Klp10A; Dlic; Kap3; dlg1; nod; Hsc70-3; wisp; Ndc80; Grip128; Tcp-1zeta; Chc; Myb; U2af50; eIF-2alpha; Nup153; SNRPG; Axs; RpS5a; baz; beta-Spec; CG8142; Grip84; Nup205; mst; tilB; Cp110; l(2)gl; U2af38; ds; CG7337; TBCD; sau; …
GO:0044763	0.00252968	5.4455	7.85354	14	5886	single-organism cellular process	0.00439944	20	CG3038; G9a; ewg; CG13375; y; ac; sc; l(1)sc; pcl; ase; CG18273; CG3156; CG17896; CG17778; Appl; vnd; CG13366; Dredd; Roc1a; Hmt4-20; SkpA; sdk; CG5254; RpL22; fz3; tw; Rbf; Sec22; MED22; TRAM; mus81; CG3703; CG3699; CG3690; CDC45L; CG14624; CG11398; CG11403; DAAM; CG11412; CG12773; CG11417; png; CG11448; Lrpprc2; Ns3; O-fut2; pck; Rab27; mei-38; rush; sta; Nmdar2; dor; hfw; CG14798; Scgdelta; Ad…
GO:0008284	0.00265089	30.1619	0.077388	2	58	positive regulation of cell proliferation	0.00451215	20	Raf; boi; N; Vsx1; Moe; CG1572; Myb; DENR; dome; fd19B; slp1; slp2; wg; gcm; bun; CG4793; CG10336; spi; cad; Dap160; dpn; pyr; SelD; Egfr; Fmr1; CG13559; mi; yki; fd64A; lin-28; vn; klu; RIOK1; CG10738; brm; Galphaf; Ras85D; Tango9; Caf1-55; htl; Dl; Stat92E; E2f1; pnt; crb; RIOK2; E(spl)mgamma-HLH; stg; ey; l(3)ry85; l(2)k06107; pont; CG32017; CG32228; Atox1; dpr4; vtd; Stlk
GO:0007346	0.00311615	12.0125	0.301546	3	226	regulation of mitotic cell cycle	0.00519358	20	ac; sc; ase; SkpA; Rbf; mus81; CDC45L; png; Klp3A; sgg; N; dgt4; mei-9; Mcm3; rux; APC7; CHES-1-like; Nek2; Smox; Moe; APC4; Dsor1; feo; RpII215; Aven; Smr; REG; ben; Myb; mei-41; fd19B; smo; ex; lwr; Mad; Spindly; slp1; slp2; Psf2; Bub1; CG14020; Rca1; Wee1; Mnn1; wg; cdc14; alien; Cks30A; me31B; Cdk1; mre11; crol; aret; Sos; spel1; Su(H); CycE; twe; Syx5; fzy; grp; CG10336; Tango6; Top2; swm; l…
GO:0000281	0.00352083	25.9672	0.0893964	2	67	mitotic cytokinesis	0.00574829	20	Ocrl; Act5C; sqh; feo; Myb; Sep4; baz; Rab35; Sep1; sau; Drp1; Sec5; CG7236; chic; Toll-4; borr; pim; aurB; l(2)gd1; kek1; Syx5; bru; dia; Nipped-A; Act42A; Incenp; scra; pnut; stmA; shrb; Cap-G; tum; Rho1; Bap55; thr; Act57B; CycB; CG30183; tsr; Slik; zip; rho; kst; Rop; pav; pbl; sti; Syx13; alphaSnap; CG10068; alphaTub84D; Caf1-55; Det; Sep2; Synd; Syx1A; Apc2; CycB3; Mink; Tl; ALiX; gammaCOP;…
GO:0000003	0.00436074	4.53929	2.27761	7	1707	reproduction	0.0068884	20	y; ac; sc; Dredd; Rbf; CG11664; mus81; png; mei-38; dor; Adar; arm; mip130; usp; ph-p; wapl; CG2918; Raf; tko; egh; Klp3A; Tsp3A; PI4KIIIalpha; sgg; per; fs(1)Yb; fs(1)Ya; w; N; ng4; dnc; Myc; Rala; fd3F; brn; Fas2; CG15571; Femcoat; Muc4B; mei-9; CHOp24; ctp; ovo; snf; dhd; spoon; SPR; frma; CG34435; Act5C; rux; raptor; sqh; CG11700; wuho; Rpt4; swa; Pat1; pigs; Cdc7; Mcm6; Pink1; Inx2; Hira; de…
GO:0031032	0.00439135	23.1068	0.100071	2	75	actomyosin structure organization	0.0068884	20	CG13366; tw; DAAM; Scgdelta; Ocrl; Actn; C3G; nullo; up; dah; if; CG6867; wupA; fliI; sau; lilli; chic; SCAR; aret; Mhc; kon; nesd; dia; pnut; Zasp52; Dg; Rho1; tn; hts; twi; tsr; zip; pav; RhoGEF4; pbl; rhea; Zasp66; Prm; Fhos; Zasp67; rt; rols; RhoGAP68F; sti; flr; nuf; Smn; Lasp; fln; polo; Mlp84B; Mical; sals; Mf; Act88F; Det; vib; CG5023; how; bond; Sry-alpha; Mlc2; bnk; bt; Rok; sol; Esm; s…
GO:0070925	0.00497755	10.1136	0.356251	3	267	organelle assembly	0.00765776	20	CG13366; tw; DAAM; sta; Scgdelta; mip130; Actn; Klp3A; C3G; Hira; CG7033; Klp10A; Kap3; nod; wisp; up; Ndc80; mamo; Grip128; Tcp-1zeta; Myb; if; wupA; pcm; Grip84; fd19B; unc; fliI; mst; tilB; Cp110; CG17599; BBS8; rempA; CG10874; sau; gammaTub23C; Chd1; Che-13; slp1; slp2; Cep97; CG13999; ifc; Osm6; Wee1; Ntl; mtsh; Rcd4; emb; borr; Cks30A; pelo; me31B; Grip75; porin; aurB; Ge-1; aret; CG5525; C…
GO:0044702	0.00602511	4.64554	1.79193	6	1343	single organism reproductive process	0.00845033	20	ac; Dredd; Rbf; mus81; png; mei-38; dor; arm; mip130; usp; ph-p; wapl; Raf; egh; Klp3A; Tsp3A; PI4KIIIalpha; sgg; fs(1)Yb; fs(1)Ya; N; ng4; dnc; Myc; Rala; fd3F; brn; Fas2; CG15571; Femcoat; Muc4B; mei-9; ctp; ovo; snf; dhd; spoon; Act5C; rux; raptor; sqh; wuho; Rpt4; swa; Pat1; pigs; Cdc7; Mcm6; Pink1; Inx2; Hira; dec-1; hdm; sn; Tbh; Cp7Fb; Cp7Fc; Cp36; Cp38; otu; Moe; His3.3B; Dsor1; lz; Ptpme…
GO:1903046	0.00602687	9.42024	0.381603	3	286	meiotic cell cycle process	0.00845033	20	mus81; mei-38; wapl; Klp3A; sgg; ng4; mei-9; dhd; rux; hdm; His3.3B; Klp10A; nod; bif; wisp; mamo; Grip128; mei-41; Pp2B-14D; Axs; Fim; corolla; Grip84; Mer; r-cup; lwr; c-cup; mio; sau; Rab5; oaf; okr; Cog3; HP6; Taf12L; His3.3A; Cap-D3; tomb; ifc; cup; cort; mtsh; aust; Cks30A; pelo; Cdk1; Grip75; w-cup; spel1; Gli; twe; c(2)M; Syx5; fzy; grp; fws; Grip71; gammaTub37C; RanGAP; Top2; neb; nesd; …
GO:0032501	0.00607342	3.97528	6.40719	12	4802	multicellular organismal process	0.00845033	20	G9a; CG13377; cin; ewg; Or1a; y; ac; sc; l(1)sc; pcl; ase; CG18273; svr; elav; Appl; vnd; CG13366; Dredd; Roc1a; SkpA; sdk; CG5254; RpL22; tw; Rbf; CG11664; CG3711; MED22; TRAM; CG3703; CG11638; CDC45L; CG11382; CG11398; CG3638; DAAM; CG11417; CG11448; Gr2a; Ns3; pck; Rab27; rush; Nmdar2; inc; dor; CG3740; hfw; a6; Scgdelta; Adar; Vps26; CG14818; trr; arm; mip130; Edem1; Hr4; usp; Actn; moody; CG…
GO:0051321	0.00614449	9.35263	0.384271	3	288	meiotic cell cycle	0.00845033	20	mus81; mei-38; wapl; Klp3A; sgg; ng4; mei-9; dhd; rux; hdm; His3.3B; Klp10A; nod; bif; wisp; mamo; Grip128; mei-41; Pp2B-14D; Axs; Fim; corolla; Grip84; Mer; r-cup; lwr; c-cup; mio; sau; Rab5; oaf; okr; Cog3; HP6; Taf12L; His3.3A; Cap-D3; tomb; ifc; cup; cort; mtsh; aust; Cks30A; pelo; Cdk1; Grip75; w-cup; spel1; Gli; twe; c(2)M; Syx5; fzy; grp; fws; Grip71; gammaTub37C; RanGAP; Top2; neb; nesd; …
GO:0007127	0.00626381	19.1455	0.120085	2	90	meiosis I	0.00845033	20	mus81; mei-38; Klp3A; ng4; mei-9; hdm; Klp10A; nod; mei-41; corolla; sau; okr; cort; Cks30A; pelo; Cdk1; spel1; twe; c(2)M; fzy; fws; Grip71; gammaTub37C; Top2; bru; dia; Mlh1; Ercc1; Xpc; Pms2; tef; CG9975; Rae1; Ubi-p63E; Sse; mei-P22; mus312; pbl; dally; orb2; bol; Klp67A; Syx13; ssp2; Msh6; mus304; sa; mia; Sec8; Mcm5; Blm; spn-B; Det; Mps1; cona; vib; trem; bond; eIF4G2; Exo84; CycG; prd1; g…
GO:0000086	0.00639956	18.9288	0.121419	2	91	G2/M transition of mitotic cell cycle	0.00845033	20	SkpA; Rbf; mus81; CDC45L; mei-9; Mcm3; CG5921; Dsor1; RpII215; Aven; Myb; mei-41; lwr; alien; me31B; Cdk1; mre11; grp; Tango6; Top2; spi; Cul1; CSN4; Cul4; CSN7; FANCI; Su(var)2-10; Prp38; Rpb5; Rcd1; Topors; Xpd; Egfr; CycB; CG13902; Mfap1; Rcd5; Myt1; MED4; mus312; Mcm7; Cdk8; CycA; Pop2; Z600; mus304; CSN1b; rept; CSN3; Rpb8; slx1; PEK; Rga; gfzf; puc; RpA-70; M1BP; Kap-alpha3; Tctp; MBD-R2; p…
GO:0007057	0.00665464	198.75	0.00667138	1	5	spindle assembly involved in female meiosis I	0.00845033	20	Klp10A; nod; Cks30A; Grip71; gammaTub37C
GO:0030037	0.00665464	198.75	0.00667138	1	5	actin filament reorganization involved in cell cycle	0.00845033	20	SCAR; Arpc1; sced; Arp3; asp
GO:0045468	0.00665464	198.75	0.00667138	1	5	regulation of R8 cell spacing in compound eye	0.00845033	20	N; sca; Egfr; Dl; E(spl)m8-HLH
GO:0051305	0.00665464	198.75	0.00667138	1	5	chromosome movement towards spindle pole	0.00845033	20	Klp10A; Kmn1; CycB; Mis12; Klp67A
GO:0090527	0.00665464	198.75	0.00667138	1	5	actin filament reorganization	0.00845033	20	SCAR; Arpc1; sced; Arp3; asp
GO:0044839	0.00709843	17.9149	0.12809	2	96	cell cycle G2/M phase transition	0.00887304	20	SkpA; Rbf; mus81; CDC45L; mei-9; Mcm3; CG5921; Dsor1; RpII215; Aven; Myb; mei-41; lwr; alien; pelo; me31B; Cdk1; mre11; twe; grp; Tango6; Top2; spi; Cul1; CSN4; Cul4; CSN7; FANCI; Su(var)2-10; Prp38; Rpb5; Rcd1; Topors; Xpd; Egfr; CycB; CG13902; Mfap1; Rcd5; Myt1; MED4; mus312; dally; Mcm7; bol; Cdk8; CycA; Pop2; Z600; mus304; CSN1b; rept; CSN3; Rpb8; slx1; PEK; Rga; gfzf; puc; RpA-70; M1BP; Kap-…
GO:0006260	0.0073873	17.5389	0.130759	2	98	DNA replication	0.00895431	20	SkpA; Rbf; CDC45L; CG14803; pn; fs(1)Ya; crm; Myc; Mcm3; CG4078; Cdc7; Mcm6; otu; Caf1-180; CG2990; RPA3; Lig4; Top1; CG8142; Psf2; eIF-4a; wg; Btk29A; mtDNA-helicase; Dref; RnrL; RfC3; Nos; RfC38; tam; Orc5; esg; CycE; chif; CG10336; Top2; CG10262; RPA2; E2f2; Mcm10; geminin; dpa; Orc1; Orc6; CG7686; CG18004; RnrS; EndoG; lat; Ctf4; PCNA; CG11788; Mes4; pita; Orc4; CG12018; dre4; RfC4; ago; DNAp…
GO:0008356	0.0073873	17.5389	0.130759	2	98	asymmetric cell division	0.00895431	20	N; pon; ric8a; dlg1; Gbeta13F; eas; baz; par-6; Cdc42; l(2)gl; AP-2alpha; eIF-4a; alien; numb; pelo; Dref; Cdk1; aurB; piwi; aub; l(2)gd1; loqs; Su(H); esg; wor; sna; CycE; Nak; brat; IKKepsilon; Incenp; scra; CSN7; ana2; Ggamma1; shrb; dap; Galphao; cnn; mam; clu; wcd; Ehbp1; stau; Ote; hts; insc; shg; egg; zip; pUf68; Iml1; Dhc64C; Myt1; Galphai; dally; orb2; CycA; Cep135; Diap1; CSN1b; CSN3; a…
GO:0032508	0.00798055	158.988	0.00800565	1	6	DNA duplex unwinding	0.00925282	20	eIF-4a; dre4; Ddx1; CG9791; Blm; pont
GO:0035155	0.00798055	158.988	0.00800565	1	6	negative regulation of terminal cell fate specification, open tracheal system	0.00925282	20	N; aop; salm; sty; Dl; hdc
GO:0050884	0.00798055	158.988	0.00800565	1	6	neuromuscular process controlling posture	0.00925282	20	iav; Trpgamma; stum; Zmynd10; nan; Calx
GO:0012501	0.00864694	8.22711	0.434974	3	326	programmed cell death	0.00930481	20	sc; Dredd; SkpA; CG5254; Rbf; CG14798; CG14812; arm; Raf; rst; N; Myc; ec; Tip60; norpA; ctp; Cdk7; lin-52; mof; Cdc7; Pink1; Atg5; Ubr3; sws; Corp; Trf2; lz; CG1791; Atg8a; Met; CG4332; IP3K2; CtsB1; Rab3-GEF; gce; CG7860; Chc; Cyp1; wgn; out; Tao; Mer; Sep1; l(2)gl; smo; ebi; ex; crq; cbt; Tspo; ninaA; S; Der-1; AIF; dpp; alpha4GT1; Che-13; Traf4; morgue; Daxx; Aatf; wg; santa-maria; Su(var)205…
GO:0006267	0.00930481	132.479	0.00933993	1	7	pre-replicative complex assembly involved in nuclear cell cycle DNA replication	0.00930481	20	Mcm3; Mcm6; Mcm10; Cdc6; Mcm7; Mcm2; Mcm5
GO:0006284	0.00930481	132.479	0.00933993	1	7	base-excision repair	0.00930481	20	XRCC1; Ogg1; CG9272; Gen; CG10694; pont; snmRNA:430:CR33733
GO:0006826	0.00930481	132.479	0.00933993	1	7	iron ion transport	0.00930481	20	Fer3HCH; Tsf1; Sec61alpha; Mvl; Zip99C; l(1)10Bp; M(1)15DEF
GO:0006879	0.00930481	132.479	0.00933993	1	7	cellular iron ion homeostasis	0.00930481	20	fh; Fer3HCH; Tsf1; ABCB7; Mvl; l(1)10Bp; M(1)15DEF
GO:0007451	0.00930481	132.479	0.00933993	1	7	dorsal/ventral lineage restriction, imaginal disc	0.00930481	20	N; ap; vg; fng; Dl; Ser; nero
GO:0008608	0.00930481	132.479	0.00933993	1	7	attachment of spindle microtubules to kinetochore	0.00930481	20	aurB; gammaTub37C; Mad1; CycB; Klp67A; ssp2; chb
GO:0032392	0.00930481	132.479	0.00933993	1	7	DNA geometric change	0.00930481	20	Marcal1; eIF-4a; dre4; Ddx1; CG9791; Blm; pont
GO:0035156	0.00930481	132.479	0.00933993	1	7	fusion cell fate specification	0.00930481	20	N; aop; dpp; ed; esg; pyd; Dl
GO:0036388	0.00930481	132.479	0.00933993	1	7	pre-replicative complex assembly	0.00930481	20	Mcm3; Mcm6; Mcm10; Cdc6; Mcm7; Mcm2; Mcm5
GO:1902299	0.00930481	132.479	0.00933993	1	7	pre-replicative complex assembly involved in cell cycle DNA replication	0.00930481	20	Mcm3; Mcm6; Mcm10; Cdc6; Mcm7; Mcm2; Mcm5
GO:0030707	2.80376e-05	19.4178	0.394475	5	359	ovarian follicle cell development	0.000492607	21	Rbf; dor; arm; mip130; usp; ph-p; Raf; egh; Tsp3A; sgg; fs(1)Yb; N; Rala; brn; CG15571; Femcoat; Muc4B; spoon; sqh; Rpt4; pigs; Cdc7; Mcm6; dec-1; Cp7Fb; Cp7Fc; Cp36; Cp38; Dsor1; Ptpmeg2; spri; dsh; hop; dlg1; Evi5; Smr; CG15721; CG12716; hep; jub; Muc12Ea; Myb; kat80; sl; if; baz; par-6; e(y)1; upd1; phm; Cyp18a1; Pvf1; Tao; dome; Cdc42; kis; smo; AP-2alpha; ex; MED15; CG4552; CG31661; cpb; aop…
GO:0002066	2.84155e-05	19.3615	0.395573	5	360	columnar/cuboidal epithelial cell development	0.000492607	21	Rbf; dor; arm; mip130; usp; ph-p; Raf; egh; Tsp3A; sgg; fs(1)Yb; N; Rala; brn; CG15571; Femcoat; Muc4B; spoon; sqh; Rpt4; pigs; Cdc7; Mcm6; dec-1; Cp7Fb; Cp7Fc; Cp36; Cp38; Dsor1; Ptpmeg2; spri; dsh; hop; dlg1; Evi5; Smr; CG15721; CG12716; hep; jub; Muc12Ea; Myb; kat80; sl; if; baz; par-6; e(y)1; upd1; phm; Cyp18a1; Pvf1; Tao; dome; Cdc42; kis; smo; AP-2alpha; ex; MED15; CG4552; CG31661; cpb; aop…
GO:0002065	3.07669e-05	19.0305	0.402166	5	366	columnar/cuboidal epithelial cell differentiation	0.000492607	21	Rbf; dor; arm; mip130; usp; ph-p; Raf; egh; Tsp3A; sgg; fs(1)Yb; N; Rala; brn; CG15571; Femcoat; Muc4B; spoon; sqh; Rpt4; pigs; Cdc7; Mcm6; dec-1; Cp7Fb; Cp7Fc; Cp36; Cp38; Dsor1; Ptpmeg2; spri; dsh; hop; dlg1; Evi5; Smr; CG15721; CG12716; hep; jub; Muc12Ea; Myb; kat80; sl; if; baz; par-6; e(y)1; upd1; phm; Cyp18a1; Pvf1; Tao; dome; Cdc42; kis; smo; AP-2alpha; ex; MED15; CG4552; CG31661; cpb; aop…
GO:0007319	3.12766e-05	353.361	0.00879052	2	8	negative regulation of oskar mRNA translation	0.000492607	21	cup; Hrb27C; aret; BicC; krimp; apt; armi; Hsp60B
GO:0002064	4.07175e-05	17.9054	0.42634	5	388	epithelial cell development	0.000513041	21	Rbf; dor; arm; mip130; usp; ph-p; Raf; egh; Tsp3A; sgg; fs(1)Yb; N; Rala; brn; CG15571; Femcoat; Muc4B; spoon; sqh; Rpt4; pigs; Cdc7; Mcm6; xit; dec-1; cyr; Cp7Fb; Cp7Fc; Cp36; Cp38; Dsor1; Ptpmeg2; spri; dsh; hop; dlg1; Evi5; Smr; CG15721; CG12716; hep; jub; Muc12Ea; Myb; kat80; sl; if; baz; par-6; e(y)1; upd1; phm; Cyp18a1; Pvf1; Tao; dome; Cdc42; fog; kis; smo; AP-2alpha; ex; MED15; CG4552; CG…
GO:0017148	5.30205e-05	52.3182	0.0758182	3	69	negative regulation of translation	0.000556715	21	Adar; Tis11; Rcd-1; Thor; cup; Hrb27C; me31B; Ge-1; aret; loqs; UK114; BicC; Nbr; Not3; Ars2; bin3; drosha; AGO1; Dg; krimp; Bap55; HPS4; Sdc; Fmr1; eIF2B-delta; apt; DCP1; Not11; armi; lin-28; Srp9; Unr; orb2; smg; Pop2; bru-3; AGO2; DCP2; tra; PEK; kra; Rga; gpp; bcd; Tailor; pum; Not10; Paip2; sqd; Atx2; Cbp20; nos; Dcr-1; twin; bam; msi; eIF4E-6; pasha; gw; ned; Vha68-1; fs(1)K79; Zw10; Hsp60…
GO:0034249	6.27766e-05	49.313	0.0802135	3	73	negative regulation of cellular amide metabolic process	0.000564989	21	Adar; Tis11; Rcd-1; Thor; cup; Hrb27C; me31B; Ge-1; aret; nub; loqs; UK114; BicC; Nbr; Not3; Ars2; bin3; drosha; AGO1; casp; Dg; krimp; Bap55; HPS4; Sdc; Fmr1; dnr1; eIF2B-delta; apt; DCP1; Not11; armi; lin-28; Srp9; Unr; orb2; smg; Pop2; bru-3; AGO2; DCP2; tra; PEK; kra; Rga; gpp; bcd; Tailor; pum; Not10; Paip2; sqd; Atx2; Cbp20; nos; Dcr-1; twin; bam; msi; eIF4E-6; pasha; gw; ned; Vha68-1; fs(1…
GO:0030855	7.3441e-05	15.736	0.48238	5	439	epithelial cell differentiation	0.000578348	21	pcl; Rbf; dor; arm; mip130; usp; ph-p; Raf; egh; Tsp3A; sgg; fs(1)Yb; N; Rala; brn; CG15571; Femcoat; Muc4B; peb; ovo; spoon; sqh; Rpt4; pigs; Cdc7; Mcm6; xit; dec-1; sn; cyr; Cp7Fb; Cp7Fc; Cp36; Cp38; Dsor1; Ptpmeg2; spri; dsh; hop; dlg1; Evi5; fw; LIMK1; Smr; CG15721; CG12716; hep; jub; Muc12Ea; Myb; kat80; sl; SMC3; if; baz; f; par-6; e(y)1; upd1; phm; Cyp18a1; Pvf1; Tao; dome; Cdc42; fog; kis…
GO:0046011	0.000101267	176.597	0.0153834	2	14	regulation of oskar mRNA translation	0.000613057	21	cup; Hrb27C; aub; aret; BicC; krimp; stau; apt; armi; osk; Syp; orb; Hsp60B; CR40601
GO:0048477	0.000108065	11.4406	0.866965	6	789	oogenesis	0.000613057	21	ac; Rbf; dor; arm; mip130; usp; ph-p; Raf; egh; Tsp3A; PI4KIIIalpha; sgg; fs(1)Yb; N; dnc; Myc; Rala; brn; CG15571; Femcoat; Muc4B; ctp; ovo; snf; spoon; raptor; sqh; wuho; Rpt4; swa; Pat1; pigs; Cdc7; Mcm6; Inx2; dec-1; sn; Cp7Fb; Cp7Fc; Cp36; Cp38; otu; Moe; Dsor1; lz; Ptpmeg2; Yp2; spri; sesB; feo; Dlic; dsh; hop; dlg1; Evi5; CkIIbeta; wisp; gd; Smr; CG15721; CG12716; hep; lic; Pdcd4; jub; yl;…
GO:0007292	0.000114313	11.3173	0.875755	6	797	female gamete generation	0.000613057	21	ac; Rbf; dor; arm; mip130; usp; ph-p; Raf; egh; Tsp3A; PI4KIIIalpha; sgg; fs(1)Yb; N; dnc; Myc; Rala; brn; CG15571; Femcoat; Muc4B; ctp; ovo; snf; spoon; raptor; sqh; wuho; Rpt4; swa; Pat1; pigs; Cdc7; Mcm6; Inx2; dec-1; sn; Tbh; Cp7Fb; Cp7Fc; Cp36; Cp38; otu; Moe; Dsor1; lz; Ptpmeg2; Yp2; Yp1; spri; sesB; feo; Dlic; dsh; hop; dlg1; Evi5; CkIIbeta; wisp; gd; Smr; CG15721; CG12716; hep; lic; Pdcd4…
GO:0042438	0.000116773	163	0.0164822	2	15	melanin biosynthetic process	0.000613057	21	y; yellow-c; yellow-b; yellow-d; yellow-d2; yellow-g; yellow-g2; yellow-k; yellow-f; yellow-f2; yellow-e3; yellow-e2; yellow-e; e; yellow-h
GO:0046189	0.000232667	111.474	0.0230751	2	21	phenol-containing compound biosynthetic process	0.0011178	21	y; Tbh; t; yellow-c; yellow-b; Ddc; 14-3-3zeta; yellow-d; yellow-d2; Trh; yellow-g; yellow-g2; ple; yellow-k; yellow-f; yellow-f2; yellow-e3; yellow-e2; yellow-e; e; yellow-h
GO:0007281	0.000248401	9.72777	1.00761	6	917	germ cell development	0.0011178	21	ac; Dredd; Rbf; dor; arm; mip130; usp; ph-p; Raf; egh; Tsp3A; PI4KIIIalpha; sgg; fs(1)Yb; N; dnc; Myc; Rala; brn; CG15571; Femcoat; Muc4B; ctp; ovo; snf; spoon; Act5C; raptor; sqh; wuho; Rpt4; swa; Pat1; pigs; Cdc7; Mcm6; Inx2; dec-1; sn; Cp7Fb; Cp7Fc; Cp36; Cp38; otu; Moe; Dsor1; lz; Ptpmeg2; Yp2; spri; sesB; feo; Dlic; dsh; hop; dlg1; Evi5; CkIIbeta; wisp; gd; Smr; CG15721; CG12716; hep; lic; P…
GO:0006417	0.000288668	28.8953	0.134055	3	122	regulation of translation	0.00121241	21	Lrpprc2; Adar; eIF2B-beta; tyf; MCTS1; Tis11; DENR; Rcd-1; okr; Thor; mxt; cup; Hrb27C; me31B; aub; Ge-1; aret; loqs; UK114; BicC; bsf; brat; CG10947; Nbr; Not3; Ars2; bin3; drosha; JhI-1; AGO1; Dg; krimp; Bap55; eIF3-S9; HPS4; stau; pAbp; Dp1; EfSec; Sdc; CG10306; Fmr1; eIF2B-delta; apt; l(2)efl; DCP1; Not11; eIF-5A; armi; lin-28; Srp9; mus301; eIF4E-3; Sbp2; Unr; GAPsec; orb2; smg; bol; Hsp67Bc…
GO:0032504	0.000342928	8.05836	1.55153	7	1412	multicellular organism reproduction	0.00135028	21	y; ac; Dredd; Rbf; CG11664; dor; Adar; arm; mip130; usp; ph-p; CG2918; Raf; tko; egh; Tsp3A; PI4KIIIalpha; sgg; per; fs(1)Yb; w; N; dnc; Myc; Rala; brn; CG15571; Femcoat; Muc4B; CHOp24; ctp; ovo; snf; spoon; SPR; frma; CG34435; Act5C; raptor; sqh; wuho; Rpt4; swa; Pat1; pigs; Cdc7; Mcm6; Pink1; Inx2; dec-1; sn; Tbh; Cp7Fb; Cp7Fc; Cp36; Cp38; otu; Nrg; Hexo2; Moe; Dsor1; lz; Ptpmeg2; Yp2; Yp1; spr…
GO:0022412	0.000399038	8.85287	1.09881	6	1000	cellular process involved in reproduction in multicellular organism	0.00147879	21	ac; Dredd; Rbf; dor; arm; mip130; usp; ph-p; Raf; egh; Tsp3A; PI4KIIIalpha; sgg; fs(1)Yb; N; dnc; Myc; Rala; brn; CG15571; Femcoat; Muc4B; ctp; ovo; snf; spoon; Act5C; raptor; sqh; wuho; Rpt4; swa; Pat1; pigs; Cdc7; Mcm6; Pink1; Inx2; dec-1; sn; Cp7Fb; Cp7Fc; Cp36; Cp38; otu; Moe; Dsor1; lz; Ptpmeg2; Yp2; Yp1; spri; sesB; feo; Dlic; dsh; hop; dlg1; Evi5; CkIIbeta; wisp; gd; Smr; CG15721; CG12716;…
GO:0003006	0.000483584	8.51723	1.13837	6	1036	developmental process involved in reproduction	0.00165442	21	ac; sc; Dredd; Rbf; dor; arm; mip130; usp; ph-p; Raf; egh; Tsp3A; PI4KIIIalpha; sgg; fs(1)Yb; N; dnc; Myc; Rala; fd3F; brn; Fas2; CG15571; Femcoat; Muc4B; ctp; ovo; snf; spoon; Act5C; raptor; sqh; wuho; Rpt4; swa; Pat1; pigs; Cdc7; Mcm6; Pink1; Inx2; dec-1; sn; Cp7Fb; Cp7Fc; Cp36; Cp38; otu; Moe; Dsor1; lz; Ptpmeg2; Yp2; Yp1; spri; sesB; feo; Dlic; sisA; dsh; hop; dlg1; Evi5; CkIIbeta; wisp; gd; …
GO:0010608	0.000498952	23.8314	0.161526	3	147	posttranscriptional regulation of gene expression	0.00165442	21	Lrpprc2; Adar; eIF2B-beta; tyf; MCTS1; Hsc70-3; Tis11; DENR; pcm; Rcd-1; okr; CG17265; Thor; mxt; cup; Hrb27C; r2d2; me31B; piwi; aub; Ge-1; aret; loqs; vig; UK114; BicC; bsf; brat; CG10947; Nbr; Not3; Ars2; bin3; drosha; JhI-1; trsn; Hen1; AGO1; Dg; krimp; Bap55; eIF3-S9; Dcr-2; HPS4; stau; pAbp; Dp1; EfSec; Sdc; CG10306; Fmr1; nsr; eIF2B-delta; apt; l(2)efl; DCP1; Not11; ppk29; eIF-5A; Tudor-SN…
GO:0007276	0.000578839	8.21268	1.17683	6	1071	gamete generation	0.0017418	21	ac; Dredd; Rbf; dor; arm; mip130; usp; ph-p; Raf; egh; Tsp3A; PI4KIIIalpha; sgg; fs(1)Yb; N; dnc; Myc; Rala; brn; CG15571; Femcoat; Muc4B; ctp; ovo; snf; spoon; Act5C; raptor; sqh; wuho; Rpt4; swa; Pat1; pigs; Cdc7; Mcm6; Inx2; dec-1; sn; Tbh; Cp7Fb; Cp7Fc; Cp36; Cp38; otu; Moe; Dsor1; lz; Ptpmeg2; Yp2; Yp1; spri; sesB; Imp; feo; Dlic; dsh; hop; dlg1; Evi5; CkIIbeta; wisp; gd; Smr; CG15721; CG127…
GO:0048067	0.000580601	68.2581	0.0362609	2	33	cuticle pigmentation	0.0017418	21	y; Torsin; ovo; t; ATP7; lic; Sec24CD; p38b; yellow-c; yellow-b; Ddc; Hr38; Pu; yellow-d; yellow-d2; yellow-g; yellow-g2; ple; yellow-k; Sec23; Mkk4; yellow-f; yellow-f2; yellow-e3; yellow-e; Ask1; e; Burs; Sar1; p38a; yellow-h; CG33339; CG43339
GO:0006403	0.000674582	21.421	0.179107	3	163	RNA localization	0.00193176	21	sta; egh; spoon; swa; Pat1; RpS28b; Dlic; CkIIbeta; wisp; Grip128; CG8184; Chc; U2af50; Mer; Trn-SR; Syt1; okr; Cog3; capu; Hel25E; chic; cup; Hrb27C; ninaC; Rbsn-5; Pka-C1; Grip75; Nup107; aub; Ge-1; Nup160; Rab6; Ref2; cni; VhaSFD; BicD; swm; CG8671; didum; CG14749; tsu; Phax; TER94; JhI-1; SmD3; Nacalpha; Lis-1; csul; Khc; POSH; Dcr-2; stau; Nup75; exu; insc; mago; tud; ND-B12; Fmr1; Gmer; CG1…
GO:0034248	0.000736595	20.7636	0.184601	3	168	regulation of cellular amide metabolic process	0.00201763	21	ac; Dredd; Lrpprc2; Adar; CG4325; eIF2B-beta; tyf; MCTS1; PGRP-SA; wisp; Tis11; DENR; psh; Rcd-1; Ntf-2; ush; okr; Thor; mxt; pog; cup; Hrb27C; me31B; aub; Ge-1; aret; nub; loqs; Tehao; UK114; BicC; cact; Dif; dl; bsf; brat; CG10947; cad; Nbr; Not3; Ars2; bin3; drosha; Myd88; Def; JhI-1; AGO1; Diap2; casp; Dg; krimp; Bap55; eIF3-S9; HPS4; stau; pAbp; Dp1; Tab2; EfSec; Sdc; CG10306; Fmr1; dnr1; eI…
GO:0044550	0.000853945	55.6535	0.0439526	2	40	secondary metabolite biosynthetic process	0.0022416	21	y; dor; z; w; rb; cm; v; car; mal; yellow-c; yellow-b; cn; Rab32; yellow-d; yellow-d2; bw; yellow-g; yellow-g2; Est-6; yellow-k; st; p; yellow-f; yellow-f2; yellow-e3; yellow-e2; yellow-e; e; bond; cd; ca; yellow-h; sbr; grt; kkv; CG32396; pod; CG32074; CG14464; anon-EB8
GO:0032269	0.00105259	18.2888	0.208775	3	190	negative regulation of cellular protein metabolic process	0.00253752	21	SkpA; CG32812; Adar; CG14812; sgg; N; Rala; peb; Tis11; par-6; CoRest; MKP-4; Rcd-1; et; l(2)gl; ebi; cpb; Hrs; Thor; Bub1; cup; cort; Rca1; Wee1; Hrb27C; Mnn1; Spn28B; Spn28Da; Spn28Dc; Cks30A; me31B; Utx; Cand1; Ge-1; aret; kek1; loqs; ics; UK114; CycE; BicC; fzy; Nbr; Not3; BubR1; Ars2; bin3; CG15237; Spn42Db; Spn42Dc; Spn42De; drosha; CSN4; Mad1; dap; Mtor; DUBAI; drk; AGO1; pcs; Diap2; casp;…
GO:0051248	0.00105259	18.2888	0.208775	3	190	negative regulation of protein metabolic process	0.00253752	21	SkpA; CG32812; Adar; CG14812; sgg; N; Rala; peb; Tis11; par-6; CoRest; MKP-4; Rcd-1; et; l(2)gl; ebi; cpb; Hrs; Thor; Bub1; cup; cort; Rca1; Wee1; Hrb27C; Mnn1; Spn28B; Spn28Da; Spn28Dc; Cks30A; me31B; Utx; Cand1; Ge-1; aret; kek1; loqs; ics; UK114; CycE; BicC; fzy; Nbr; Not3; BubR1; Ars2; bin3; CG15237; Spn42Db; Spn42Dc; Spn42De; drosha; CSN4; Mad1; dap; Mtor; DUBAI; drk; AGO1; pcs; Diap2; casp;…
GO:0000003	0.00110927	6.48647	1.87568	7	1707	reproduction	0.00253752	21	y; ac; sc; Dredd; Rbf; CG11664; mus81; png; mei-38; dor; Adar; arm; mip130; usp; ph-p; wapl; CG2918; Raf; tko; egh; Klp3A; Tsp3A; PI4KIIIalpha; sgg; per; fs(1)Yb; fs(1)Ya; w; N; ng4; dnc; Myc; Rala; fd3F; brn; Fas2; CG15571; Femcoat; Muc4B; mei-9; CHOp24; ctp; ovo; snf; dhd; spoon; SPR; frma; CG34435; Act5C; rux; raptor; sqh; CG11700; wuho; Rpt4; swa; Pat1; pigs; Cdc7; Mcm6; Pink1; Inx2; Hira; de…
GO:0048609	0.00112779	7.15824	1.33286	6	1213	multicellular organismal reproductive process	0.00253752	21	y; ac; Dredd; Rbf; dor; Adar; arm; mip130; usp; ph-p; Raf; tko; egh; Tsp3A; PI4KIIIalpha; sgg; per; fs(1)Yb; w; N; dnc; Myc; Rala; brn; CG15571; Femcoat; Muc4B; CHOp24; ctp; ovo; snf; spoon; SPR; frma; Act5C; raptor; sqh; wuho; Rpt4; swa; Pat1; pigs; Cdc7; Mcm6; Inx2; dec-1; sn; Tbh; Cp7Fb; Cp7Fc; Cp36; Cp38; otu; Nrg; Moe; Dsor1; lz; Ptpmeg2; Yp2; Yp1; spri; sesB; Imp; feo; CG15208; Dlic; CG1520…
GO:1901617	0.00122875	45.9457	0.0527431	2	48	organic hydroxy compound biosynthetic process	0.0026165	21	y; usp; Marf; Tbh; CG15343; t; IP3K2; phm; Ipk2; yellow-c; yellow-b; Ddc; CG10268; CG2201; Inos; 14-3-3zeta; Cyp6t3; Ipk1; yellow-d; yellow-d2; Trh; ecd; yellow-g; yellow-g2; spo; ple; SMSr; Pdxk; yellow-k; sgll; yellow-f; yellow-f2; yellow-e3; yellow-e2; yellow-e; foxo; CG4335; e; sro; yellow-h; scg; Dk; l(1)13Fa; esp; FASN2; CG31493; LpR1; CG34201
GO:0019953	0.00124595	7.01037	1.35814	6	1236	sexual reproduction	0.0026165	21	y; ac; Dredd; Rbf; png; dor; Adar; arm; mip130; usp; ph-p; Raf; tko; egh; Klp3A; Tsp3A; PI4KIIIalpha; sgg; per; fs(1)Yb; fs(1)Ya; w; N; dnc; Myc; Rala; brn; CG15571; Femcoat; Muc4B; ctp; ovo; snf; spoon; SPR; frma; Act5C; raptor; sqh; wuho; Rpt4; swa; Pat1; pigs; Cdc7; Mcm6; Inx2; Hira; dec-1; sn; Tbh; Cp7Fb; Cp7Fc; Cp36; Cp38; otu; Nrg; Moe; Dsor1; lz; Ptpmeg2; Yp2; Yp1; spri; sesB; Imp; feo; CG…
GO:0044703	0.00133936	6.90457	1.37682	6	1253	multi-organism reproductive process	0.00272192	21	y; ac; Dredd; Rbf; png; dor; Adar; arm; mip130; usp; ph-p; Raf; tko; egh; Klp3A; Tsp3A; PI4KIIIalpha; sgg; per; fs(1)Yb; fs(1)Ya; w; N; dnc; Myc; Rala; brn; CG15571; Femcoat; Muc4B; CHOp24; ctp; ovo; snf; spoon; SPR; frma; Act5C; raptor; sqh; wuho; Rpt4; swa; Pat1; pigs; Cdc7; Mcm6; Inx2; Hira; dec-1; sn; Tbh; Cp7Fb; Cp7Fc; Cp36; Cp38; otu; Nrg; Moe; Dsor1; lz; Ptpmeg2; Yp2; Yp1; spri; sesB; Imp;…
GO:0044702	0.00192889	6.3893	1.47571	6	1343	single organism reproductive process	0.0037975	21	ac; Dredd; Rbf; mus81; png; mei-38; dor; arm; mip130; usp; ph-p; wapl; Raf; egh; Klp3A; Tsp3A; PI4KIIIalpha; sgg; fs(1)Yb; fs(1)Ya; N; ng4; dnc; Myc; Rala; fd3F; brn; Fas2; CG15571; Femcoat; Muc4B; mei-9; ctp; ovo; snf; dhd; spoon; Act5C; rux; raptor; sqh; wuho; Rpt4; swa; Pat1; pigs; Cdc7; Mcm6; Pink1; Inx2; Hira; dec-1; hdm; sn; Tbh; Cp7Fb; Cp7Fc; Cp36; Cp38; otu; Moe; His3.3B; Dsor1; lz; Ptpme…
GO:0006582	0.00204188	35.1861	0.0681265	2	62	melanin metabolic process	0.00389814	21	y; Nrg; hep; Flo2; Hayan; Vav; Cdc42; Zir; Spn28Dc; Cdk5alpha; yellow-c; yellow-b; dl; dia; Itgbn; Eb1; PPO2; egr; Cdk5; Rho1; Dark; PPO1; yellow-d; yellow-d2; RhoGEF3; Rac1; yellow-g; yellow-g2; Dhc64C; LanA; Rac2; PGRP-LC; Dronc; DCTN1-p150; DCX-EMAP; yellow-k; Exn; grim; Spn77Ba; RhoBTB; Als2; MP1; Sp7; RhoL; yellow-f; yellow-f2; poly; yellow-e3; yellow-e2; yellow-e; e; Tl; yellow-h; Ephrin; E…
GO:0051236	0.00274268	30.1357	0.0791147	2	72	establishment of RNA localization	0.00508203	21	sta; egh; RpS28b; Dlic; CG8184; Chc; U2af50; Trn-SR; Cog3; Hel25E; ninaC; Nup107; Nup160; Ref2; VhaSFD; BicD; swm; CG8671; CG14749; tsu; Phax; JhI-1; Dcr-2; Nup75; mago; tud; ND-B12; Fmr1; Gmer; CG12782; Pi3K59F; egl; Nxt1; thoc5; thoc7; Dhc64C; smg; Bet3; alphaTub67C; thoc6; DCTN1-p150; AGO2; Arl1; Trs20; nxf2; Hpr1; nxf4; CG8773; sqd; ldlCp; CG4572; Srp72; CG7907; CG5382; AP-2mu; Nup133; Dcr-1;…
GO:0018958	0.00305049	28.4977	0.0835099	2	76	phenol-containing compound metabolic process	0.00549088	21	y; Torsin; Tbh; Nrg; t; hep; Flo2; Hayan; Vav; Cdc42; Zir; Spn28Dc; Cdk5alpha; yellow-c; yellow-b; dl; amd; Ddc; dia; Itgbn; Eb1; PPO2; egr; 14-3-3zeta; Cdk5; Rho1; Dark; PPO1; yellow-d; yellow-d2; Dat; RhoGEF3; Trh; Rac1; yellow-g; yellow-g2; Dhc64C; LanA; ple; Rac2; PGRP-LC; Dronc; DCTN1-p150; DCX-EMAP; yellow-k; Exn; grim; Dysb; Spn77Ba; RhoBTB; Als2; MP1; Sp7; RhoL; yellow-f; yellow-f2; poly;…
GO:0046148	0.00329154	27.381	0.0868064	2	79	pigment biosynthetic process	0.0057602	21	y; CG3156; dor; z; w; rb; cm; v; car; mal; Dbp21E2; ninaA; ade3; santa-maria; PAPLA1; CG5037; EMC3; yellow-c; yellow-b; pr; cn; Rab32; Updo; Adgf-E; Pu; yellow-d; yellow-d2; bw; CG3803; Alas; yellow-g; yellow-g2; Hexo1; Prat2; Hn; se; yellow-k; st; Adgf-B; Adgf-A; DhpD; Prat; p; alpha-Man-IIa; yellow-f; yellow-f2; yellow-e3; yellow-e2; yellow-e; ninaB; Adgf-D; Adgf-C; alpha-Man-IIb; Xport; e; rdh…
GO:0022414	0.00358693	5.57974	1.66361	6	1514	reproductive process	0.00601225	21	y; ac; sc; Dredd; Rbf; mus81; png; mei-38; dor; Adar; arm; mip130; usp; ph-p; wapl; Raf; tko; egh; Klp3A; Tsp3A; PI4KIIIalpha; sgg; per; fs(1)Yb; fs(1)Ya; w; N; ng4; dnc; Myc; Rala; fd3F; brn; Fas2; CG15571; Femcoat; Muc4B; mei-9; CHOp24; ctp; ovo; snf; dhd; spoon; SPR; frma; Act5C; rux; raptor; sqh; CG11700; wuho; Rpt4; swa; Pat1; pigs; Cdc7; Mcm6; Pink1; Inx2; Hira; dec-1; hdm; sn; Tbh; Cp7Fb; …
GO:0007315	0.00362644	26.0206	0.0912016	2	83	pole plasm assembly	0.00601225	21	swa; Pat1; Moe; Chc; Mer; Syt1; capu; chic; cup; Hrb27C; Rbsn-5; Pka-C1; aub; Ge-1; Rab6; cni; vls; didum; gcl; tsu; TER94; psq; cuff; SmD3; Nacalpha; csul; Khc; POSH; stau; exu; mago; tud; DCP1; klar; Hsp83; armi; Rop; Rac2; blue; Lasp; mael; lost; eIF4AIII; osk; rump; glo; sqd; Lkb1; Tm1; spn-E; mira; Rab11; slmb; cnc; orb; Syx1A; Ets97D; btz; spn-F; Hnf4; blo; Spl; fs(1)K79; CG31773; dpr1; sdv…
GO:0007028	0.00424927	23.9375	0.0988933	2	90	cytoplasm organization	0.0068642	21	swa; Pat1; Moe; Yp2; Yp1; Yp3; yl; Chc; Mer; Syt1; capu; chic; cup; Hrb27C; Rbsn-5; Pka-C1; aub; Ge-1; Rab6; cni; vls; didum; gcl; tsu; TER94; psq; cuff; SmD3; Nacalpha; csul; Khc; POSH; stau; EndoB; exu; mago; tud; DCP1; klar; Hsp83; armi; Rop; Rac2; blue; Lasp; mael; lost; jagn; eIF4AIII; osk; rump; glo; sqd; Lkb1; Tm1; spn-E; mira; Rab11; slmb; cnc; orb; Syx1A; Ets97D; btz; spn-F; Hnf4; blo; S…
GO:0051704	0.00455988	5.28748	1.74382	6	1587	multi-organism process	0.00704868	21	G9a; CG13377; y; ac; Dredd; Rbf; CG3638; png; ssx; dor; Adar; CG14812; arm; mip130; usp; CG4325; ph-p; Raf; tko; egh; Klp3A; Tsp3A; PI4KIIIalpha; sgg; per; fs(1)Yb; fs(1)Ya; Syx4; CG32795; w; N; dnc; Myc; Rala; Vap-33A; brn; tyf; CG15571; Femcoat; Muc4B; CHOp24; CG3527; ctp; ovo; snf; spoon; CG16756; SPR; frma; Act5C; raptor; sqh; wuho; Rpt4; swa; Pat1; pigs; Cdc7; Mcm6; Inx2; CBP; Hira; dec-1; s…
GO:0051179	0.00458724	4.89486	2.38003	7	2166	localization	0.00704868	21	CG3156; svr; CG4293; Roc1a; CG5254; Sec22; TRAM; CG3690; CG3638; CG12773; Ns3; pck; Rab27; rush; sta; Nmdar2; inc; dor; CG14798; Scgdelta; Pex5; Vps26; arm; Ocrl; usp; Actn; Unc-76; Nmd3; Mct1; Vinc; crn; CG3191; CG3091; Raf; gt; Vha36-3; egh; Tsp3A; Seipin; brv3; sgg; Csat; ttm50; Syx4; w; N; Myc; CG10804; Gas8; Parg; Mnt; Rala; yin; CG2930; VhaAC39-1; CG42541; Vap-33A; lva; brn; norpA; CG3556; …
GO:0007306	0.0047225	22.6416	0.104387	2	95	eggshell chorion assembly	0.00708374	21	Rbf; mip130; N; CG15571; Femcoat; Muc4B; spoon; Cdc7; Mcm6; dec-1; Cp36; Cp38; hep; Myb; kat80; Cdc42; CG31661; dpp; okr; ed; smt3; grk; CG13113; aub; zuc; bun; CycE; cni; cact; chif; Pax; gus; geminin; Cul4; Jra; RanBPM; Dp; mip120; Khc; mip40; PCNA; Egfr; emc; Rac1; armi; lama; ndl; Rac2; Cp18; Cp15; Cp19; Cp16; mirr; Klc; Cad74A; mael; hd; puc; pic; Orc2; jvl; Caf1-55; spn-E; asun; Pxt; Ppcs; …
GO:0008298	0.00491834	22.1614	0.106585	2	97	intracellular mRNA localization	0.00720594	21	spoon; swa; Pat1; CkIIbeta; wisp; Grip128; Chc; Mer; Syt1; okr; capu; chic; cup; Hrb27C; Rbsn-5; Pka-C1; Grip75; aub; Ge-1; Rab6; cni; BicD; didum; tsu; TER94; SmD3; Nacalpha; Lis-1; csul; Khc; POSH; stau; exu; mago; tud; egl; DCP1; klar; Hsp83; armi; Rop; Dhc64C; Rac2; mus301; blue; D; Lasp; mael; lost; eIF4AIII; osk; rump; glo; sqd; Lkb1; spn-B; Tm1; spn-E; msps; mira; Rab11; slmb; lsn; cnc; or…
GO:0048066	0.00511791	21.701	0.108783	2	99	developmental pigmentation	0.00732791	21	y; sdk; dor; pn; z; w; bi; rb; Torsin; ovo; cm; t; v; dsh; ATP7; lic; car; mal; S6kII; Dbp21E2; ninaA; Sec24CD; dpp; eya; wg; santa-maria; PAPLA1; EMC3; p38b; b; yellow-c; esg; yellow-b; Socs36E; Ddc; Hr38; cn; Rab32; Pu; yellow-d; yellow-d2; bw; Dat; bab1; yellow-g; yellow-g2; Hexo1; ple; Hn; se; yellow-k; Notum; st; DhpD; Sec23; dsx; Mkk4; p; alpha-Man-IIa; ninaG; yellow-f; yellow-f2; ry; yello…
GO:0043488	0.00548287	244.673	0.00549407	1	5	regulation of mRNA stability	0.0073981	21	Tis11; smg; CG9791; osk; CG11337
GO:0007314	0.00595309	20.0349	0.117573	2	107	oocyte anterior/posterior axis specification	0.0073981	21	N; swa; Pat1; Moe; lic; Grip128; Chc; baz; Mer; l(2)gl; Syt1; capu; chic; cup; Hrb27C; Rbsn-5; grk; Pka-C1; Grip75; aub; Ge-1; Rab6; cni; BicD; vls; IKKepsilon; E2f2; gus; didum; gcl; tsu; TER94; psq; cuff; SmD3; Nacalpha; Dg; csul; Khc; POSH; stau; exu; shg; mago; tud; Egfr; DCP1; klar; Hsp83; armi; Rop; Rac2; blue; Lasp; mael; lost; eIF4AIII; osk; rump; glo; sqd; Lkb1; Tm1; spn-E; msps; CSN5; n…
GO:0019748	0.00595309	20.0349	0.117573	2	107	secondary metabolic process	0.0073981	21	y; dor; z; w; rb; ovo; cm; Nrg; v; hep; Flo2; Hayan; phm; Cyp308a1; Vav; car; Cdc42; mal; Zir; Cyp4ac1; Cyp4ac2; Spn28Dc; Cdk5alpha; AstC; yellow-c; yellow-b; dl; dia; Itgbn; Eb1; cn; PPO2; Rab32; egr; dare; Cyp6g1; Cyp6a9; Cyp6a8; Cdk5; Cyp4aa1; Rho1; Vha44; Dark; PPO1; yellow-d; yellow-d2; bw; RhoGEF3; Rac1; ecd; yellow-g; yellow-g2; Dhc64C; LanA; Rac2; PGRP-LC; Dronc; E(z); Est-6; SP; DCTN1-p1…
GO:0043473	0.00595309	20.0349	0.117573	2	107	pigmentation	0.0073981	21	y; sdk; dor; pn; z; w; bi; rb; Torsin; ovo; cm; t; v; dsh; ATP7; lic; B-H2; B-H1; car; mal; S6kII; Dbp21E2; ninaA; Sec24CD; dpp; eya; wg; santa-maria; PAPLA1; EMC3; p38b; b; yellow-c; esg; yellow-b; Socs36E; Ddc; Hr38; cn; Rab32; Shroom; Pu; yellow-d; yellow-d2; bw; Dat; bab1; yellow-g; yellow-g2; Hexo1; ple; Hn; se; Blos4; Pallidin; yellow-k; Notum; st; Dysb; DhpD; Sec23; dsx; Mkk4; p; Vps16A; a…
GO:0008358	0.00639263	19.2936	0.121968	2	111	maternal determination of anterior/posterior axis, embryo	0.0073981	21	N; swa; Pat1; Moe; lic; Grip128; Chc; baz; Mer; l(2)gl; Syt1; capu; chic; cup; Hrb27C; Rbsn-5; grk; Pka-C1; trk; Grip75; aub; Ge-1; Rab6; cni; dl; BicD; vls; IKKepsilon; E2f2; gus; didum; sax; gcl; tsu; TER94; psq; cuff; SmD3; Nacalpha; Dg; csul; Khc; POSH; stau; exu; shg; mago; tud; Egfr; DCP1; klar; Hsp83; armi; Rop; Rac2; blue; Lasp; mael; lost; bcd; eIF4AIII; osk; rump; glo; sqd; Lkb1; Tm1; s…
GO:0060429	0.00651748	5.48765	1.29111	5	1175	epithelium development	0.0073981	21	G9a; ewg; ac; sc; l(1)sc; pcl; ase; svr; CG13366; Rbf; CG11382; dor; arm; mip130; usp; ph-p; crn; Raf; boi; egh; Tsp3A; sgg; fs(1)Yb; N; Myc; Rala; ec; VhaAC39-1; brn; Fas2; CG15571; Femcoat; Muc4B; bi; CHOp24; peb; pon; ctp; ovo; spoon; RhoGAP5A; CG5966; rux; sqh; Rpt4; dx; pigs; Cdc7; Mcm6; Nf-YC; xit; Atx-1; Inx2; nullo; brk; Dok; CHES-1-like; dec-1; sn; fs(1)h; cyr; Smox; Traf6; Cp7Fb; Cp7Fc;…
GO:0031442	0.00657609	195.723	0.00659289	1	6	positive regulation of mRNA 3'-end processing	0.0073981	21	piwi; aub; smg; pum; spn-E; ND-AGGG
GO:0043487	0.00657609	195.723	0.00659289	1	6	regulation of RNA stability	0.0073981	21	Tis11; smg; CG9791; osk; Smg6; CG11337
GO:0050685	0.00657609	195.723	0.00659289	1	6	positive regulation of mRNA processing	0.0073981	21	piwi; aub; smg; pum; spn-E; ND-AGGG
GO:0060211	0.00657609	195.723	0.00659289	1	6	regulation of nuclear-transcribed mRNA poly(A) tail shortening	0.0073981	21	piwi; aub; smg; pum; spn-E; ND-AGGG
GO:0060213	0.00657609	195.723	0.00659289	1	6	positive regulation of nuclear-transcribed mRNA poly(A) tail shortening	0.0073981	21	piwi; aub; smg; pum; spn-E; ND-AGGG
GO:0097320	0.00657609	195.723	0.00659289	1	6	membrane tubulation	0.0073981	21	dia; EndoB; Cip4; Arp3; EndoA; CG42542
GO:0048468	0.00681548	4.82224	1.88886	6	1719	cell development	0.00753289	21	G9a; ac; Appl; vnd; CG13366; Dredd; Roc1a; SkpA; sdk; CG5254; tw; Rbf; MED22; CG3703; CDC45L; CG11398; DAAM; CG11448; pck; rush; dor; Scgdelta; arm; mip130; usp; Actn; moody; CG4061; ph-p; Vinc; crn; Raf; gt; egh; Tsp3A; PI4KIIIalpha; sgg; fs(1)Yb; rst; N; dnc; Myc; Mnt; Rala; fd3F; CG2901; ec; lva; brn; Fas2; CG15571; Femcoat; Muc4B; norpA; peb; ctp; Ptp4E; ovo; snf; spoon; GAA1; Act5C; raptor; …
GO:1900151	0.00766819	163.09	0.0076917	1	7	regulation of nuclear-transcribed mRNA catabolic process, deadenylation-dependent decay	0.00818807	21	Tis11; piwi; aub; smg; pum; spn-E; ND-AGGG
GO:1900153	0.00766819	163.09	0.0076917	1	7	positive regulation of nuclear-transcribed mRNA catabolic process, deadenylation-dependent decay	0.00818807	21	Tis11; piwi; aub; smg; pum; spn-E; ND-AGGG
GO:0061013	0.00875918	139.78	0.00879052	1	8	regulation of mRNA catabolic process	0.00880514	21	Upf1; Tis11; piwi; aub; smg; pum; spn-E; ND-AGGG
GO:0061014	0.00875918	139.78	0.00879052	1	8	positive regulation of mRNA catabolic process	0.00880514	21	Upf1; Tis11; piwi; aub; smg; pum; spn-E; ND-AGGG
GO:1903313	0.00875918	139.78	0.00879052	1	8	positive regulation of mRNA metabolic process	0.00880514	21	Upf1; Tis11; piwi; aub; smg; pum; spn-E; ND-AGGG
GO:0042440	0.00880514	16.2765	0.143945	2	131	pigment metabolic process	0.00880514	21	y; CG3156; dor; z; w; rb; cm; Nrg; v; hep; Flo2; Hayan; Vav; car; Cdc42; mal; Zir; ush; Dbp21E2; ninaA; ade3; santa-maria; Spn28Dc; PAPLA1; Cdk5alpha; CG5037; EMC3; yellow-c; yellow-b; dl; pr; dia; Itgbn; Eb1; cn; PPO2; Rab32; Updo; egr; Adgf-E; Cdk5; Rho1; Dark; PPO1; Pu; yellow-d; yellow-d2; bw; CG3803; Alas; RhoGEF3; Rac1; yellow-g; yellow-g2; Hexo1; Dhc64C; LanA; Prat2; Rac2; Hn; se; PGRP-LC;…
GO:0008340	0.00016918	38.7963	0.116553	3	165	determination of adult lifespan	0.00291917	22	dor; Edem1; per; N; rb; raptor; CG11700; cm; snz; Smox; Trxr-1; Ppt1; alpha-Man-Ia; Atg8a; sesB; SelG; hep; Clic; rut; PGRP-LE; ND-20; mthl1; car; Cbs; S6kII; kis; Tspo; NLaz; GlyP; aop; daw; Thor; Daxx; Mnn1; Btk29A; Eaat1; Mtpalpha; Trx-2; CYLD; Cdk5alpha; Mt2; bun; Sirt1; p38b; tam; VhaSFD; CG10383; hook; sNPF; mle; EcR; Zip42C.1; Tsp42Ef; babo; hebe; magu; Ef1alpha48D; Sin3A; CG42663; GLaz; m…
GO:0010259	0.000178445	38.0818	0.118672	3	168	multicellular organism aging	0.00291917	22	dor; Edem1; per; N; rb; raptor; CG11700; cm; snz; Smox; Trxr-1; Ppt1; alpha-Man-Ia; Atg8a; sesB; SelG; hep; Clic; rut; PGRP-LE; ND-20; mthl1; car; Cbs; S6kII; kis; Tspo; NLaz; GlyP; aop; daw; Thor; vri; Daxx; Mnn1; Btk29A; Eaat1; Mtpalpha; Trx-2; CYLD; Cdk5alpha; Mt2; bun; Sirt1; p38b; tam; VhaSFD; CG10383; hook; sNPF; mle; EcR; Zip42C.1; Tsp42Ef; babo; hebe; magu; Jra; Ef1alpha48D; Sin3A; CG4266…
GO:0007568	0.000194611	36.9471	0.122204	3	173	aging	0.00291917	22	dor; Edem1; per; N; rb; raptor; CG11700; cm; snz; Smox; Trxr-1; Ppt1; alpha-Man-Ia; Atg8a; sesB; SelG; hep; Clic; rut; PGRP-LE; ND-20; mthl1; car; Cbs; S6kII; kis; Tspo; NLaz; GlyP; aop; daw; Thor; vri; Lam; Daxx; Mnn1; Btk29A; Eaat1; Mtpalpha; Trx-2; CYLD; Cdk5alpha; Mt2; bun; Sirt1; p38b; tam; VhaSFD; CG10383; hook; sNPF; mle; EcR; Zip42C.1; Tsp42Ef; babo; hebe; magu; Jra; Ef1alpha48D; Sin3A; C…
GO:0006259	0.000939753	21.227	0.209089	3	296	DNA metabolic process	0.00941977	22	SkpA; Rbf; mus81; CDC45L; CG11403; mei-38; CG14803; mip130; pn; Klp3A; fs(1)Ya; crm; Myc; Xpac; mei-9; ovo; Mcm3; XRCC1; CG4078; mof; Top3beta; Cdc7; Mcm6; hdm; otu; Caf1-180; Ogg1; CG2990; Ipod; Hmr; nod; RPA3; CkIalpha; Lig4; Top1; mh; CG42299; cerv; Myb; mei-41; SMC3; corolla; CG8142; Rad51D; Tfb4; mio; Rad1; Rrp1; okr; gkt; CG3238; Psf2; HP6; Marcal1; Cap-D3; eIF-4a; Nse1; Rat1; Mnn1; wg; CG5…
GO:0044710	0.00124793	9.81076	1.5272	6	2162	single-organism metabolic process	0.00941977	22	CG3038; G9a; y; ac; sc; l(1)sc; Cyp4g1; CG3156; CG17896; CG13369; Hmt4-20; SkpA; tw; Rbf; mus81; CG3699; CG11403; CG11412; Lrpprc2; O-fut2; mei-38; dor; Adar; CG14803; trr; mip130; Edem1; Ocrl; CG4406; usp; CG4199; CG3835; Pgd; Cyp4d1; ND-B14.5A; Cyp4d2; Cyp4ae1; pn; Raf; gt; z; Pdfr; Klp3A; Seipin; PI4KIIIalpha; sgg; w; CG12498; N; dnc; Myc; CG10802; Parg; Mnt; Rala; Vap-33A; CG6428; Xpac; brn; …
GO:0010720	0.00136216	46.3516	0.0565105	2	80	positive regulation of cell development	0.00941977	22	G9a; DAAM; Raf; Myc; ec; lva; ctp; oc; lz; Imp; sev; dsh; mbt; ari-1; Wnt5; fd19B; aop; slp1; slp2; morgue; chic; wg; gcm; bun; spi; Nf-YB; Dap160; Mcm10; Strica; didum; dpn; Vang; stan; pyr; Dp; drk; shot; Hr51; Dark; GM130; Fmr1; Pi3K59F; TBPH; yki; Rac1; dar1; fd64A; Dhc64C; scny; pbl; Fhos; RasGAP1; Dronc; klu; RIOK1; Atg1; Lasp; Sec23; kat-60L1; Dfd; Atg13; Ras85D; Akt1; Rab1; E2f1; CG6353; …
GO:0045597	0.0014653	44.6243	0.0586296	2	83	positive regulation of cell differentiation	0.00941977	22	G9a; DAAM; Raf; Myc; ec; lva; ctp; oc; lz; Imp; sev; dsh; Pdcd4; mbt; ari-1; Wnt5; fd19B; aop; slp1; slp2; morgue; chic; wg; gcm; aret; bun; spi; Nf-YB; Dap160; Mcm10; Strica; didum; dpn; Vang; stan; pyr; Dp; drk; shot; Hr51; Dark; GM130; Fmr1; Pi3K59F; TBPH; yki; Rac1; dar1; fd64A; Dhc64C; scny; pbl; Fhos; RasGAP1; Dronc; klu; RIOK1; Atg1; Lasp; Sec23; kat-60L1; Dfd; Atg13; Ras85D; Akt1; Rab1; E…
GO:0006305	0.00352747	397.75	0.0035319	1	5	DNA alkylation	0.00956543	22	Ipod; Su(var)205; Mt2; egg; Su(var)3-9
GO:0006306	0.00352747	397.75	0.0035319	1	5	DNA methylation	0.00956543	22	Ipod; Su(var)205; Mt2; egg; Su(var)3-9
GO:0007057	0.00352747	397.75	0.0035319	1	5	spindle assembly involved in female meiosis I	0.00956543	22	Klp10A; nod; Cks30A; Grip71; gammaTub37C
GO:0045850	0.00352747	397.75	0.0035319	1	5	positive regulation of nurse cell apoptotic process	0.00956543	22	Dp; Pi3K59F; Atg1; Atg13; E2f1
GO:0032837	0.00423164	318.175	0.00423829	1	6	distributive segregation	0.00956543	22	mei-38; nod; Axs; mtrm; Mps1; ncd
GO:0035155	0.00423164	318.175	0.00423829	1	6	negative regulation of terminal cell fate specification, open tracheal system	0.00956543	22	N; aop; salm; sty; Dl; hdc
GO:0044728	0.00423164	318.175	0.00423829	1	6	DNA methylation or demethylation	0.00956543	22	Ipod; Su(var)205; Mt2; egg; Tet; Su(var)3-9
GO:0043900	0.00451342	24.802	0.103838	2	147	regulation of multi-organism process	0.00956543	22	G9a; ac; Dredd; CG4325; egh; CHOp24; SPR; swa; Traf6; Hexo2; dlg1; PGRP-SA; p24-1; wisp; opm; Vps4; psh; Ntf-2; Usp2; ush; Syt1; pog; Acp26Aa; Sec61alpha; cup; Hrb27C; Rack1; Pka-C1; me31B; aub; Mt2; nub; Tehao; TM9SF4; cact; Dif; dl; CG10333; TM9SF2; cad; Ars2; EcR; Gadd45; didum; tsu; shrb; Myd88; TER94; Def; Jra; Listericin; Drip; Nacalpha; Dp; Diap2; casp; Khc; Dcr-2; stau; Atg7; Tab2; Toll-7…
GO:0006304	0.00493536	265.125	0.00494467	1	7	DNA modification	0.00956543	22	Ipod; Su(var)205; Mt2; egg; Tet; agt; Su(var)3-9
GO:0006313	0.00493536	265.125	0.00494467	1	7	transposition, DNA-mediated	0.00956543	22	piwi; Acn; tsu; mago; RnpS1; CG4570; spn-E
GO:0035156	0.00493536	265.125	0.00494467	1	7	fusion cell fate specification	0.00956543	22	N; aop; dpp; ed; esg; pyd; Dl
GO:0045678	0.00493536	265.125	0.00494467	1	7	positive regulation of R7 cell differentiation	0.00956543	22	sev; aop; Nf-YB; Mcm10; drk; RasGAP1; alph
GO:1904747	0.00493536	265.125	0.00494467	1	7	positive regulation of apoptotic process involved in development	0.00956543	22	Dp; Pi3K59F; Atg1; Dfd; Atg13; E2f1; Amy-p
GO:0007144	0.00563864	227.232	0.00565105	1	8	female meiosis I	0.00956543	22	Klp10A; nod; cort; Cks30A; fzy; Grip71; gammaTub37C; S6KL
GO:0030488	0.00563864	227.232	0.00565105	1	8	tRNA methylation	0.00956543	22	CG15618; CG9596; Mt2; CG34195; CG17807; CG14544; bae; Drsl4
GO:2000243	0.00563864	227.232	0.00565105	1	8	positive regulation of reproductive process	0.00956543	22	didum; Dp; Pi3K59F; bol; Atg1; Lasp; Atg13; E2f1
GO:0035154	0.00634148	198.812	0.00635743	1	9	terminal cell fate specification, open tracheal system	0.00956543	22	N; aop; salm; bs; sty; Smn; Dl; hdc; 5SrRNA:CR33428
GO:0045477	0.00634148	198.812	0.00635743	1	9	regulation of nurse cell apoptotic process	0.00956543	22	Dp; Pi3K59F; Atg1; Atg13; Bruce; slmb; E2f1; Zhr; ogre
GO:0048518	0.00692156	7.63877	0.855427	4	1211	positive regulation of biological process	0.00956543	22	G9a; ewg; ac; sc; l(1)sc; ase; vnd; Dredd; SkpA; RpL22; CDC45L; DAAM; Ns3; CG14812; Pgam5; trr; arm; usp; CG3630; pn; CG3071; Ilp6; Raf; PsGEF; boi; z; Pdfr; Tsp3A; Seipin; sgg; CG32795; N; Myc; ec; lva; tyf; norpA; rb; CHOp24; CG3527; Torsin; ctp; Bteb2; ovo; Vsx1; RhoGAP5A; mof; MCTS1; raptor; Top3beta; Rpt4; Marf; dx; APC7; Cdc7; CG3198; Pink1; shf; C3G; NELF-B; Nek2; Ubr3; fs(1)h; Traf6; CG10…
GO:0002230	0.00704388	176.708	0.00706381	1	10	positive regulation of defense response to virus by host	0.00956543	22	Dredd; Mt2; Dcr-2; Tab2; key; Rel; Stat92E; Fadd; Nc98F; Hs2st
GO:0046533	0.00704388	176.708	0.00706381	1	10	negative regulation of photoreceptor cell differentiation	0.00956543	22	sdk; N; S6kII; aop; Kr-h1; Socs36E; cdi; ro; Dlip1; p38c
GO:0050691	0.00704388	176.708	0.00706381	1	10	regulation of defense response to virus by host	0.00956543	22	Dredd; Mt2; Dcr-2; Tab2; key; Rel; Stat92E; Fadd; Nc98F; Hs2st
GO:0060232	0.00704388	176.708	0.00706381	1	10	delamination	0.00956543	22	arm; dlg1; baz; aop; aos; Timp; Lkb1; pygo; l(2)3A2; dpr1
GO:0051240	0.0076623	18.7599	0.136332	2	193	positive regulation of multicellular organismal process	0.00956543	22	G9a; RpL22; Ns3; arm; Ilp6; Raf; Myc; ec; lva; CG3527; ctp; raptor; Top3beta; oc; Rbm13; CG7246; fh; Dsor1; lz; BTBD9; Imp; sev; dsh; dlg1; Drak; cac; lic; jub; ben; CG8939; caz; Arp2; mbt; mnb; ari-1; upd2; Wnt5; fd19B; kis; ebi; Ptth; dbe; cpb; aop; Sec24CD; dpp; Mad; slp1; slp2; morgue; tkv; vri; chic; homer; wg; d; Dh31; Acer; gcm; bun; p38b; spi; Nf-YB; sNPF; Dap160; Mcm10; step; Strica; EcR…
GO:0051094	0.00773928	18.6607	0.137038	2	194	positive regulation of developmental process	0.00956543	22	G9a; RpL22; DAAM; Ns3; Pgam5; arm; Ilp6; Raf; Myc; ec; lva; CG3527; ctp; raptor; Top3beta; Marf; Pink1; oc; Rbm13; CG7246; fh; Dsor1; lz; Imp; sev; dsh; dlg1; Drak; cac; lic; Pdcd4; jub; ben; CG8939; caz; Arp2; mbt; mnb; ari-1; upd2; Wnt5; pico; fd19B; kis; ebi; Ptth; dbe; cpb; aop; Sec24CD; dpp; Drp1; Mad; slp1; slp2; morgue; tkv; chic; wg; d; gcm; aret; bun; PICK1; p38b; spi; Nf-YB; sNPF; Dap16…
GO:0022408	0.00774583	159.025	0.00777019	1	11	negative regulation of cell-cell adhesion	0.00956543	22	arm; N; dlg1; baz; aop; aos; Timp; Lkb1; pygo; l(2)3A2; dpr1
GO:0031116	0.00774583	159.025	0.00777019	1	11	positive regulation of microtubule polymerization	0.00956543	22	nod; Grip128; Grip84; Grip75; CG18109; CG7716; Grip163; Jupiter; msps; l(1)ESHS14; CG32240
GO:1904748	0.00774583	159.025	0.00777019	1	11	regulation of apoptotic process involved in development	0.00956543	22	Dp; Pi3K59F; Atg1; Dfd; Atg13; Bruce; slmb; E2f1; Zhr; ogre; Amy-p
GO:0007163	0.00812947	18.1798	0.14057	2	199	establishment or maintenance of cell polarity	0.00956543	22	fz3; arm; Raf; egh; PI4KIIIalpha; sgg; N; Rala; ec; brn; peb; ctp; spoon; sn; Moe; ric8a; sev; Klp10A; Kap3; dsh; hop; dlg1; nod; fw; Tomosyn; Chc; baz; par-6; Vps4; Cdc42; l(2)gl; ds; S; frtz; aop; Sec24CD; Rab5; gkt; ft; Wnt4; wg; Wnt10; Rbsn-5; fy; grk; d; Pka-C1; Rab6; cni; BicD; CadN; CadN2; Eb1; lig; Vps25; ana2; Vang; alc; TER94; Jra; 14-3-3zeta; stan; dgo; Syx7; sca; Dp; fas; Shroom; Lap1…
GO:0031113	0.00844735	144.557	0.00847657	1	12	regulation of microtubule polymerization	0.00956543	22	nod; Grip128; Grip84; TBCD; Grip75; CG18109; CG7716; Grip163; Jupiter; msps; l(1)ESHS14; CG32240
GO:0046534	0.00844735	144.557	0.00847657	1	12	positive regulation of photoreceptor cell differentiation	0.00956543	22	Raf; oc; sev; mbt; aop; Nf-YB; Mcm10; drk; RasGAP1; Ras85D; alph; vtd
GO:0048747	0.00844735	144.557	0.00847657	1	12	muscle fiber development	0.00956543	22	aop; Mef2; Khc; tn; Act57B; twi; Rac1; sty; ens; htl; pnt; brc
GO:0006139	0.00882493	6.28195	1.49611	5	2118	nucleobase-containing compound metabolic process	0.00956543	22	ewg; ac; sc; l(1)sc; ase; CG17896; elav; vnd; l(1)1Bi; su(sable); Hmt4-20; SkpA; Rbf; MED22; mus81; TfIIA-S-2; CDC45L; su(w[a]); CG11403; CG11418; Lrpprc2; mei-38; sta; Adar; MED18; CG14803; trr; arm; mip130; Hr4; usp; CG4061; CG4045; CG16903; ph-p; Pgd; ND-B14.5A; pn; crn; CG3071; Raf; gt; z; Pdfr; Klp3A; sgg; CG2652; per; CG2685; fs(1)Ya; crm; CG12498; N; dnc; Myc; CG10802; Parg; Mnt; fd3F; CG4…
GO:0007162	0.00914842	132.5	0.00918295	1	13	negative regulation of cell adhesion	0.00956543	22	arm; N; dlg1; baz; aop; Lar; aos; Timp; Lkb1; pygo; jbug; l(2)3A2; dpr1
GO:0031112	0.00914842	132.5	0.00918295	1	13	positive regulation of microtubule polymerization or depolymerization	0.00956543	22	nod; Grip128; Grip84; Grip75; CG18109; mlt; CG7716; Grip163; Jupiter; msps; spas; l(1)ESHS14; CG32240
GO:0045314	0.00914842	132.5	0.00918295	1	13	regulation of compound eye photoreceptor development	0.00956543	22	N; oc; mbt; aop; Kr-h1; PDZ-GEF; pAbp; sty; neur; nct; cv-2; l(3)85Ai; Dlip1
GO:0002682	0.00935286	16.8733	0.151166	2	214	regulation of immune system process	0.00956543	22	G9a; ac; Dredd; CG4325; sgg; CG32795; N; Rala; Ubr3; Traf6; Crag; hop; CG1572; PGRP-SA; wisp; hep; PGRP-LE; upd1; betaCOP; Hayan; psh; Ulp1; dome; Ntf-2; Usp2; crq; ush; lwr; GlyP; aop; pog; CG14040; Lam; dsf; CG13994; smt3; Wnt4; wg; LanB1; Spn28Dc; Pvr; C1GalTA; gcm; gcm2; Etl1; me31B; CYLD; RluA-2; aub; Mt2; nub; Prosalpha6T; Tehao; p38b; CG4793; heix; cact; Dif; dl; CG10333; cad; EcR; ubl; Cy…
GO:0042478	0.00984906	122.298	0.00988933	1	14	regulation of eye photoreceptor cell development	0.00984906	22	N; oc; mbt; aop; Kr-h1; PDZ-GEF; pAbp; sty; neur; tinc; nct; cv-2; l(3)85Ai; Dlip1
GO:0050794	3.46254e-06	2.88426	19.9608	39	3179	regulation of cellular process	0.000381696	23	snoRNA:Or-CD9b; CR42874; clt; Gr98c; CG32396; mthl11; Gr93d; Gr22e; Ranbp16; CR43418; Mst77Y-3Psi; Mst77Y-4; Mst77Y-6Psi; Pif2; CR44047; CR44048; CG43710; CR44197; CG31381; CR45594; CR44767; CR44555; CR44683; ATP6; sprt; CG30056; CG30087; CG30177; CG30284; Cht12; CG30323; CG30343; CG30357; CG30383; CG30424; CG30480; CG30497; ch; Fs(2)Etr; l(3)cl-R3; Res; fs(1)60; l(1)L25.7; zpg; rets; pre-mod(mdg…
GO:0031323	5.30133e-06	3.2447	10.4356	26	1662	regulation of cellular metabolic process	0.000381696	23	snoRNA:Or-CD9b; CR42874; clt; Gr98c; CG32396; CR44197; CG31381; CR45594; CR44767; CR44683; CG30087; Cht12; CG30357; CG30383; CG30480; CG30497; l(1)L25.7; CR40601; NA; Mod(var)E646; Mod(var)E226; Mod(var)E1672; Mod(var)E1451; Mod(var)E1377; Mod(var)E1350; Mod(var)E1275; Mod(var)E1261; Mod(var)E1178; Mod(var)E113; Mod(var)E1060; Mod(var)E1047; Mod(var)600; Mod(var)26; Mod(var)242; Mod(var)234; Mod(…
GO:0080090	1.07943e-05	3.15814	10.1593	25	1618	regulation of primary metabolic process	0.000469903	23	snoRNA:Or-CD9b; CR42874; clt; Gr98c; CG32396; CR44197; CG31381; CR45594; CR44767; CR44683; CG30087; Cht12; CG30357; CG30383; CG30480; CG30497; Su(osk)C37; l(1)L25.7; CR40601; NA; Mod(var)E646; Mod(var)E226; Mod(var)E1672; Mod(var)E1451; Mod(var)E1377; Mod(var)E1350; Mod(var)E1275; Mod(var)E1261; Mod(var)E1178; Mod(var)E113; Mod(var)E1060; Mod(var)E1047; Mod(var)600; Mod(var)26; Mod(var)242; Mod(v…
GO:0019222	1.30529e-05	3.0132	11.6663	27	1858	regulation of metabolic process	0.000469903	23	snoRNA:Or-CD9b; CR42874; clt; Gr98c; CG32396; mir-2a-2; CR44197; CG31381; CR45594; CR44767; CR44683; trnN; CG30087; Cht12; CG30357; CG30383; CG30480; CG30497; cs; Su(osk)C37; l(1)L25.7; CR40601; NA; Mod(var)E646; Mod(var)E226; Mod(var)E1672; Mod(var)E1451; Mod(var)E1377; Mod(var)E1350; Mod(var)E1275; Mod(var)E1261; Mod(var)E1178; Mod(var)E113; Mod(var)E1060; Mod(var)E1047; Mod(var)600; Mod(var)26…
GO:0090304	2.37494e-05	2.94518	11.3335	26	1805	nucleic acid metabolic process	0.000645213	23	CR42874; clt; TotZ; mir-306; Mst77Y-7; Mst77Y-8; Su(E1)-A; CR44047; CG4747; CG32032; CR44582; CR44767; CR44683; ATP6; CG30087; CG30197; CG30344; mei-S8; mus208; Pzl; PRY; WDY; CCY; CR40601; Mod(var)E646; Mod(var)E226; Mod(var)E1672; Mod(var)E1451; Mod(var)E1377; Mod(var)E1350; Mod(var)E1275; Mod(var)E1261; Mod(var)E1178; Mod(var)E113; Mod(var)E1060; Mod(var)E1047; Mod(var)600; Mod(var)26; Mod(var…
GO:0050789	2.68839e-05	2.58471	21.631	39	3445	regulation of biological process	0.000645213	23	snoRNA:Or-CD9b; CR40441; CR42874; clt; Gr98c; Gpi1; CG32396; mthl11; Gr93d; Gr22e; Ranbp16; mir-2a-2; CR43418; Mst77Y-3Psi; Mst77Y-4; Mst77Y-6Psi; Pif2; CR44047; CR44048; CG43710; CR44197; CG31381; CR45594; CR44767; CR44401; CR44555; CR44773; CR44683; ATP6; trnN; sprt; CG30056; CG30087; CG30177; CG30284; Cht12; CG30323; CG30343; CG30357; CG30383; CG30424; CG30480; CG30497; ch; cs; Fs(2)Etr; l(3)c…
GO:0019219	3.64725e-05	3.34338	6.89428	19	1098	regulation of nucleobase-containing compound metabolic process	0.000750292	23	CR42874; clt; CR44767; CR44683; CG30087; Mod(var)E646; Mod(var)E226; Mod(var)E1672; Mod(var)E1451; Mod(var)E1377; Mod(var)E1350; Mod(var)E1275; Mod(var)E1261; Mod(var)E1178; Mod(var)E113; Mod(var)E1060; Mod(var)E1047; Mod(var)600; Mod(var)26; Mod(var)242; Mod(var)234; Mod(var)224; Mod(var)177; Mod(var)1683; Mod(var)1658; Mod(var)1657; Mod(var)1650; Mod(var)1641; Mod(var)1602; Mod(var)1557; Mod(va…
GO:0040034	5.0348e-05	54.7706	0.0753473	3	12	regulation of development, heterochronic	0.00080573	23	usp; fog; EcR; Hr46; Kr; Eip74EF; ftz-f1; hb; Ino80; Tsc1; dcm; brc
GO:0051171	5.03581e-05	3.16611	7.69798	20	1226	regulation of nitrogen compound metabolic process	0.00080573	23	snoRNA:Or-CD9b; CR42874; clt; Gr98c; CR45594; CR44767; CR44683; CG30087; l(1)L25.7; CR40601; Mod(var)E646; Mod(var)E226; Mod(var)E1672; Mod(var)E1451; Mod(var)E1377; Mod(var)E1350; Mod(var)E1275; Mod(var)E1261; Mod(var)E1178; Mod(var)E113; Mod(var)E1060; Mod(var)E1047; Mod(var)600; Mod(var)26; Mod(var)242; Mod(var)234; Mod(var)224; Mod(var)177; Mod(var)1683; Mod(var)1658; Mod(var)1657; Mod(var)16…
GO:0060255	6.98183e-05	2.88191	9.90817	23	1578	regulation of macromolecule metabolic process	0.00100538	23	snoRNA:Or-CD9b; CR42874; clt; Gr98c; mir-2a-2; CR44197; CG31381; CR45594; CR44767; CR44683; CG30087; Cht12; CG30480; CG30497; l(1)L25.7; CR40601; NA; Mod(var)E646; Mod(var)E226; Mod(var)E1672; Mod(var)E1451; Mod(var)E1377; Mod(var)E1350; Mod(var)E1275; Mod(var)E1261; Mod(var)E1178; Mod(var)E113; Mod(var)E1060; Mod(var)E1047; Mod(var)600; Mod(var)26; Mod(var)242; Mod(var)234; Mod(var)224; Mod(var)…
GO:0016568	0.000197992	5.56138	1.60741	8	256	chromatin modification	0.00232875	23	clt; Mst77Y-7; Mst77Y-8; Su(E1)-A; Pzl; PRY; WDY; CCY; CG33269; G9a; Hmt4-20; CG11412; trr; z; CG12498; Parg; Tip60; CG2982; Sirt4; mof; Act5C; Btnd; Cdc7; Hira; tut; HP1b; Bap111; CG31286; Cfp1; CG31704; CG31710; CG31735; CG31870; CG31874; Pa1; Chrac-16; Usp7; Bap60; HDAC4; Set2; Top1; HDAC6; Arp6; rumi; CG31272; Nup153; e(y)1; Spt7; Arp8; Ada3; Ing3; CoRest; e(y)3; Hers; ebi; CG12674; Atxn7; El…
GO:0065007	0.000204296	2.2941	23.546	39	3750	biological regulation	0.00232875	23	snoRNA:Or-CD9b; CR40441; CR42874; clt; Gr98c; HBS1; Gpi1; CG32396; TotZ; mthl11; Gr93d; Gr22e; Ranbp16; mir-2a-2; mir-4947; CR43418; Mst77Y-3Psi; Mst77Y-4; Mst77Y-6Psi; Pif2; CR44047; CR44048; CG43710; CR44197; CG31381; CR45594; CR44767; CR44401; CR44555; CR44737; CR44773; CR44683; ATP6; trnN; sprt; CG30056; CG30087; CG30177; CG30284; Cht12; CG30323; CG30343; CG30357; CG30383; CG30424; CG30480; C…
GO:0016070	0.000220884	2.68935	9.96468	22	1587	RNA metabolic process	0.00232875	23	CR42874; clt; mir-306; CR44047; CG4747; CG32032; CR44582; CR44767; CR44683; CG30344; CR40601; Mod(var)E646; Mod(var)E226; Mod(var)E1672; Mod(var)E1451; Mod(var)E1377; Mod(var)E1350; Mod(var)E1275; Mod(var)E1261; Mod(var)E1178; Mod(var)E113; Mod(var)E1060; Mod(var)E1047; Mod(var)600; Mod(var)26; Mod(var)242; Mod(var)234; Mod(var)224; Mod(var)177; Mod(var)1683; Mod(var)1658; Mod(var)1657; Mod(var)1…
GO:0009893	0.000231785	3.57957	4.16922	13	664	positive regulation of metabolic process	0.00232875	23	CR42874; Gr98c; CR44683; CG30480; cs; CR40601; p38c; CG33269; G9a; ac; sc; l(1)sc; ase; vnd; Dredd; trr; arm; usp; pn; CG3071; Raf; z; Pdfr; sgg; N; Myc; tyf; rb; Torsin; Bteb2; ovo; RhoGAP5A; mof; MCTS1; raptor; Rpt4; APC7; Cdc7; CG3198; C3G; NELF-B; fs(1)h; Traf6; CG10555; Trf2; org-1; CG32017; otu; Crag; oc; Lim1; HP1b; fh; Bap111; CG31010; Dsor1; lz; btd; sesB; CDK2AP1; sisA; PGRP-SA; Met; Up…
GO:0031325	0.000270663	3.72282	3.67318	12	585	positive regulation of cellular metabolic process	0.00232875	23	CR42874; Gr98c; CR44683; CG30480; CR40601; p38c; CG33269; G9a; ac; sc; l(1)sc; ase; vnd; Dredd; trr; arm; usp; pn; CG3071; Raf; z; Pdfr; sgg; N; Myc; tyf; Bteb2; ovo; mof; MCTS1; raptor; Rpt4; APC7; Cdc7; CG3198; NELF-B; fs(1)h; Traf6; CG10555; Trf2; org-1; CG32017; otu; oc; Lim1; HP1b; fh; Bap111; CG31010; Dsor1; lz; btd; sesB; CDK2AP1; sisA; PGRP-SA; Met; Upf1; CkIalpha; Tis11; Brms1; hep; lic;…
GO:0051276	0.000292247	3.48905	4.26968	13	680	chromosome organization	0.00232875	23	clt; TotZ; CG43133; Mst77Y-7; Mst77Y-8; Su(E1)-A; disjointed; l(2)GPMG-14; Pzl; PRY; WDY; CCY; CR40005; CR40601; Mod(var)E646; Mod(var)E226; Mod(var)E1672; Mod(var)E1451; Mod(var)E1377; Mod(var)E1350; Mod(var)E1275; Mod(var)E1261; Mod(var)E1178; Mod(var)E113; Mod(var)E1060; Mod(var)E1047; Mod(var)600; Mod(var)26; Mod(var)242; Mod(var)234; Mod(var)224; Mod(var)177; Mod(var)1683; Mod(var)1658; Mod(…
GO:0010557	0.000348708	4.55229	2.21019	9	352	positive regulation of macromolecule biosynthetic process	0.00232875	23	CR42874; Gr98c; CR44683; CR40601; p38c; CG33269; ac; sc; l(1)sc; ase; vnd; trr; arm; usp; pn; CG3071; z; N; Myc; tyf; Bteb2; ovo; mof; MCTS1; Rpt4; Cdc7; NELF-B; fs(1)h; CG10555; Trf2; org-1; CG32017; otu; oc; Lim1; HP1b; Bap111; CG31010; lz; btd; sisA; Met; Brms1; hep; Bap60; sno; gce; sd; Myb; exd; disco; Nup153; DENR; e(y)1; Ada3; Taf8; CrebB; Bx; fu; CoRest; e(y)3; vfl; fd19B; run; cbt; Pph13…
GO:0045935	0.000348708	4.55229	2.21019	9	352	positive regulation of nucleobase-containing compound metabolic process	0.00232875	23	CR42874; CR44683; p38c; CG33269; ac; sc; l(1)sc; ase; vnd; trr; arm; usp; pn; CG3071; z; Pdfr; N; Myc; Bteb2; ovo; mof; Rpt4; Cdc7; NELF-B; fs(1)h; CG10555; Trf2; org-1; CG32017; otu; oc; Lim1; HP1b; Bap111; CG31010; lz; btd; sesB; sisA; Met; Upf1; Tis11; Brms1; hep; Bap60; sno; gce; sd; Myb; exd; disco; Nup153; e(y)1; Ada3; Taf8; CrebB; Bx; fu; CoRest; e(y)3; vfl; amn; fd19B; run; cbt; Pph13; Sa…
GO:0006139	0.000357657	2.43249	13.2988	26	2118	nucleobase-containing compound metabolic process	0.00232875	23	CR42874; clt; HBS1; TotZ; mir-306; Mst77Y-7; Mst77Y-8; Su(E1)-A; CR44047; CG4747; CG32032; CR44582; CR44767; CR44683; COX2; ATP6; trnG; trnR; trnN; ND6; trnS1; ND1; srRNA; mthl13; CG30087; CG30105; CG30197; CG30291; CG30344; CG30355; CG30411; mei-S8; mus208; Pzl; PRY; WDY; CCY; CR40601; Mod(var)E646; Mod(var)E226; Mod(var)E1672; Mod(var)E1451; Mod(var)E1377; Mod(var)E1350; Mod(var)E1275; Mod(var)…
GO:0046620	0.000359067	13.2747	0.339063	4	54	regulation of organ growth	0.00232875	23	CG32396; rets; p38c; usp; Myc; CG32022; jub; Atox1; Tao; Mer; kis; Pi3K21B; ebi; ex; dpp; ed; ft; tkv; d; Nos; RtGEF; lig; Git; hpo; Fmr1; Pdk1; S6k; sfl; dally; ssp; Wbp2; dlp; TSG101; hid; kug; gig; dsx; foxo; Fbxl7; Akt1; Ubx; Hs6st; Pi3K92E; hh; Tsc1; crb; wts; jbug; Ref1; ear; Reph; l(2)PC4-427; CG18812; Dsp1
GO:2000112	0.0003602	2.91122	6.85033	17	1091	regulation of cellular macromolecule biosynthetic process	0.00232875	23	snoRNA:Or-CD9b; CR42874; clt; Gr98c; CR45594; CR44767; CR44683; CG30087; l(1)L25.7; CR40601; Mod(var)E646; Mod(var)E226; Mod(var)E1672; Mod(var)E1451; Mod(var)E1377; Mod(var)E1350; Mod(var)E1275; Mod(var)E1261; Mod(var)E1178; Mod(var)E113; Mod(var)E1060; Mod(var)E1047; Mod(var)600; Mod(var)26; Mod(var)242; Mod(var)234; Mod(var)224; Mod(var)177; Mod(var)1683; Mod(var)1658; Mod(var)1657; Mod(var)16…
GO:0006260	0.000370179	9.00932	0.615336	5	98	DNA replication	0.00232875	23	ATP6; CG30087; SkpA; Rbf; CDC45L; CG14803; pn; fs(1)Ya; crm; Myc; Mcm3; CG4078; Cdc7; Mcm6; otu; Caf1-180; CG2990; RPA3; Lig4; Top1; CG8142; Psf2; eIF-4a; wg; Btk29A; mtDNA-helicase; Dref; RnrL; RfC3; Nos; RfC38; tam; Orc5; esg; CycE; chif; CG10336; Top2; CG10262; RPA2; E2f2; Mcm10; geminin; dpa; Orc1; Orc6; CG7686; CG18004; RnrS; EndoG; lat; Ctf4; PCNA; CG11788; Mes4; snmRNA:430:CR33732; pita; O…
GO:0010556	0.000371953	2.90236	6.86916	17	1094	regulation of macromolecule biosynthetic process	0.00232875	23	snoRNA:Or-CD9b; CR42874; clt; Gr98c; CR45594; CR44767; CR44683; CG30087; l(1)L25.7; CR40601; Mod(var)E646; Mod(var)E226; Mod(var)E1672; Mod(var)E1451; Mod(var)E1377; Mod(var)E1350; Mod(var)E1275; Mod(var)E1261; Mod(var)E1178; Mod(var)E113; Mod(var)E1060; Mod(var)E1047; Mod(var)600; Mod(var)26; Mod(var)242; Mod(var)234; Mod(var)224; Mod(var)177; Mod(var)1683; Mod(var)1658; Mod(var)1657; Mod(var)16…
GO:0006338	0.000445241	8.63505	0.640452	5	102	chromatin remodeling	0.00267145	23	clt; Mst77Y-7; Mst77Y-8; Su(E1)-A; Pzl; PRY; WDY; CCY; Tip60; Act5C; Hira; HP1b; Bap111; CG31286; Chrac-16; Bap60; Top1; Arp6; CG31272; Nup153; Arp8; Ada3; Ing3; Hers; Chd1; okr; tyn; Hel25E; Gas41; Atac1; Su(var)205; D12; YL-1; ProtA; ProtB; NC2beta; Atac2; Nipped-A; CG10395; mle; MrgBP; E(Pc); tou; Mtor; Iswi; Psc; Su(var)2-HP2; Bap55; P32; Dp1; DMAP1; Sgf29; Fmr1; tRNA:G3:35Be; Nap1; Nurf-38; …
[truncated: 2,135 more rows]
