# Supplementary material for: The developmental proteome of Drosophila melanogaster
Source: HighWire-hosted journal article supplement (doi:10.1101/gr.213694.116), 2017-04-05
Supplement: Supplemental_Tables.zip [file Supplemental_Table_S14.xlsx]

## Sheet: Clusters
gene	tissue	cluster
Nxt1	Brain	1
l(3)02640	Brain	1
CG6179	Brain	1
PDCD-5	Brain	1
CG7945	Brain	1
trn	Brain	1
CG13298	Brain	1
Bka	Brain	1
CG15160	Brain	1
CG31320	Brain	1
CG4203	Brain	1
CaMKI	Brain	1
l(3)73Ah	Brain	1
Vps28	Brain	1
CG4078	Brain	1
CG17493	Brain	1
usp	Brain	1
CG9922	Brain	1
CG6153	Brain	1
msl-1	Brain	1
CG10555	Brain	1
eas	Brain	1
rap	Brain	2
Es2	Brain	2
Eip75B	Brain	2
CG5021	Brain	2
D19A	Brain	2
Hr78	Brain	2
CG7239	Brain	2
CG9773	Brain	2
CG31121	Brain	2
CG10011	Brain	2
CG10465	Brain	2
sm	Brain	2
Nhe2	Brain	2
pros	Brain	2
CG10903	Brain	2
cpo	Brain	2
CG18088	Brain	2
CG6218	Brain	2
CG10338	Brain	2
CG9449	Brain	2
CG9527	Brain	2
ari-2	Brain	3
dy	Brain	3
ftz-f1	Brain	3
Osi14	Brain	3
Obp83g	Brain	3
svp	Brain	3
EcR	Brain	3
CG10936	Brain	3
CG8192	Brain	3
tinc	Brain	3
CG1732	Brain	3
CG10249	Brain	3
Eaat1	Brain	3
CG2016	Brain	3
CG5756	Brain	3
CG11873	Brain	3
CG9265	Brain	3
pain	Brain	3
RhoGEF3	Brain	3
C3G	Brain	3
Sirt2	Brain	3
CG6337	Brain	3
CG13920	Brain	3
CG7457	Brain	3
CG6885	Brain	4
Bsg25A	Brain	4
CG11396	Brain	4
CG10050	Brain	4
mira	Brain	4
sca	Brain	4
didum	Brain	4
shn	Brain	4
CG10035	Brain	4
Bub1	Brain	4
ImpE2	Brain	5
CG15731	Brain	5
CG7272	Brain	5
blue	Brain	5
CG10361	Brain	5
Cg25C	Brain	5
Ccm3	Brain	5
ewg	Brain	5
CG6959	Brain	5
Ank2	Brain	5
sd	Brain	5
Cht3	Brain	5
ect	Brain	5
CG9380	Brain	5
CG13506	Brain	5
CG10211	Brain	5
CG31235	Brain	5
mu2	Brain	6
Ero1L	Brain	6
CG6812	Brain	6
rt	Brain	6
Rad17	Brain	6
CG31223	Brain	6
AP-1sigma	Brain	6
CG17508	Brain	6
CG6406	Brain	6
CG10265	Brain	6
cid	Brain	6
CG18659	Brain	6
WASp	Brain	6
cos	Brain	6
Su(Tpl)	Brain	6
CG2990	Brain	7
Klp61F	Brain	7
feo	Brain	7
mus101	Brain	7
CG32576	Brain	7
Orc5	Brain	7
asp	Brain	7
lola	Brain	7
DNApol-alpha73	Brain	7
Dl	Brain	7
CG8478	Brain	7
Klp3A	Brain	7
ncd	Brain	7
CG3295	Brain	8
CG16787	Brain	8
CG16985	Brain	8
Chd3	Brain	8
Tsp74F	Brain	8
CG4942	Brain	8
Gug	Brain	8
Cyp6t1	Brain	8
Mad	Brain	8
CG15390	Brain	8
CG7289	Brain	8
galectin	Brain	8
esc	Brain	8
CG9267	Brain	8
Syx5	Brain	8
CG9253	Brain	8
MAGE	Brain	8
Irbp	Brain	8
CG9286	Brain	8
CG5447	Brain	8
CG7747	Brain	8
CG11825	Brain	8
phr	Brain	8
DIP1	Brain	8
sbb	Brain	8
SNF4Agamma	Brain	8
bsk	Brain	8
CG8298	Brain	8
CG7231	Brain	8
CG17715	Brain	8
CG11737	Brain	8
CG5823	Brain	8
CG12547	Brain	8
CG9917	Brain	8
CG9667	Brain	8
Mct1	Brain	8
ytr	Brain	8
CG4788	Brain	8
CG4658	Brain	8
brat	Brain	8
HmgZ	Brain	8
CG7222	Brain	8
fdl	Brain	8
RpL12	Brain	9
Ssrp	Brain	9
CG13900	Brain	9
dre4	Brain	9
RpII215	Brain	9
Aats-arg	Brain	9
Pgm	Brain	9
brm	Brain	9
eIF-2beta	Brain	9
CG8108	Brain	9
Mcm7	Brain	9
msk	Brain	9
Pdsw	Brain	9
CG5355	Brain	9
Mcm2	Brain	9
CG9603	Brain	9
CG5214	Brain	9
B52	Brain	9
Aats-gln	Brain	9
CG14516	Brain	9
Sap-r	Brain	9
CG17337	Brain	9
Sec61beta	Brain	9
CG8778	Brain	9
Df31	Brain	9
polo	Brain	9
Cnx99A	Brain	9
Fas1	Brain	9
Dhod	Brain	9
CG11089	Brain	9
Nrt	Brain	9
ApepP	Brain	9
CG32230	Brain	9
CG13397	Brain	9
capt	Brain	9
His2Av	Brain	9
Nup154	Brain	9
dpa	Brain	9
smt3	Brain	9
CG14814	Brain	10
CG4476	Brain	10
CG13295	Brain	10
CycE	Brain	10
ea	Brain	10
CG17549	Brain	10
CG7115	Brain	10
Glut1	Brain	10
CG6293	Brain	10
Prosap	Brain	10
Picot	Brain	10
CG32039	Brain	10
Mlc-c	Brain	11
CG11583	Brain	11
l(1)10Bb	Brain	11
par-6	Brain	11
CG4573	Brain	11
CG3408	Brain	11
CG3523	Brain	11
CG12375	Brain	11
CG5861	Brain	11
l(2)37Bb	Brain	11
CG12360	Brain	11
Su(var)3-7	Brain	11
SF1	Brain	11
CHORD	Brain	11
XNP	Brain	11
Act42A	Brain	11
drk	Brain	11
hrg	Brain	11
Lar	Brain	11
CG5919	Brain	11
CG3437	Brain	11
Spn	Brain	11
mbf1	Brain	11
snRNP-U1-70K	Brain	11
Rpb5	Brain	11
CG32103	Brain	11
TfIIB	Brain	11
Rab35	Brain	11
nonA-l	Brain	11
CG10092	Brain	11
l(2)09851	Brain	11
CG3036	Brain	11
Tsp42Ee	Brain	11
CG1532	Brain	11
Ranbp21	Brain	11
mRpL49	Brain	11
lid	Brain	11
rl	Brain	11
Rrp6	Brain	11
CG3226	Brain	12
Gip	Brain	12
Tal	Brain	12
mRpS17	Brain	12
CG9186	Brain	12
pav	Brain	12
Ulp1	Brain	12
CG9330	Brain	12
Cat	Brain	12
mRpS26	Brain	12
Sep1	Brain	12
mRpL10	Brain	12
CG2051	Brain	12
Mcr	Brain	12
Srp54	Brain	12
CG1091	Brain	12
Ugt86Da	Brain	12
CG6950	Brain	12
Set	Brain	12
CG7718	Brain	12
CG9436	Brain	12
FK506-bp2	Brain	12
CG8235	Brain	12
CG3689	Brain	12
Ide	Brain	12
kis	Brain	12
CG17691	Brain	12
Lis-1	Brain	12
wds	Brain	12
Dref	Brain	12
CG12400	Brain	12
CG7712	Brain	12
CG3605	Brain	12
piwi	Brain	12
Cam	Brain	12
HmgD	Brain	12
Fas2	Brain	13
CG5800	Brain	13
ft	Brain	13
CG5958	Brain	13
Pnn	Brain	13
CG31002	Brain	13
CG11563	Brain	13
nrv2	Brain	13
grh	Brain	13
CG7470	Brain	13
Ance	Brain	13
Hsp60	Brain	14
RpL10Ab	Brain	14
RnrL	Brain	14
bel	Brain	14
Oscp	Brain	14
RpL18A	Brain	14
ERp60	Brain	14
CG33303	Brain	14
Top2	Brain	14
Hsp83	Brain	14
Vha68-2	Brain	14
RpS7	Brain	14
RpL24	Brain	14
Hsp27	Brain	14
ari-2	CNS	1
CG9503	CNS	1
ftz-f1	CNS	1
svp	CNS	1
EcR	CNS	1
CG10936	CNS	1
CG1674	CNS	1
CG1732	CNS	1
CG11247	CNS	1
Osi19	CNS	1
CG10249	CNS	1
pros	CNS	1
jing	CNS	1
pain	CNS	1
RhoGEF3	CNS	1
CG1092	CNS	1
CG6337	CNS	1
CG13920	CNS	1
Gmer	CNS	2
CG16787	CNS	2
mu2	CNS	2
Ero1L	CNS	2
CG6812	CNS	2
Gug	CNS	2
Cyp6t1	CNS	2
hoe1	CNS	2
CG9267	CNS	2
AP-1sigma	CNS	2
Mes-4	CNS	2
phr	CNS	2
lola	CNS	2
mnd	CNS	2
DIP1	CNS	2
sbb	CNS	2
Pi3K68D	CNS	2
CG8298	CNS	2
pr-set7	CNS	2
CG12773	CNS	2
fwd	CNS	2
Rlip	CNS	2
CG13366	CNS	2
Mct1	CNS	2
Sdc	CNS	2
CG6650	CNS	2
ytr	CNS	2
CG6885	CNS	3
CG17068	CNS	3
Bsg25A	CNS	3
CycE	CNS	3
mira	CNS	3
stau	CNS	3
sca	CNS	3
nuf	CNS	3
Glut1	CNS	3
Prosap	CNS	3
Picot	CNS	3
Bub1	CNS	3
CG2990	CNS	4
Klp61F	CNS	4
Chd3	CNS	4
CG3523	CNS	4
Orc5	CNS	4
fzy	CNS	4
asp	CNS	4
ref(2)P	CNS	4
Dl	CNS	4
CG8478	CNS	4
CycB3	CNS	4
Klp3A	CNS	4
ncd	CNS	4
CG15239	CNS	5
wrapper	CNS	5
CG9628	CNS	5
Ccm3	CNS	5
CG6356	CNS	5
CG13627	CNS	5
CG10151	CNS	5
ewg	CNS	5
Ank2	CNS	5
sd	CNS	5
Cht3	CNS	5
ect	CNS	5
zormin	CNS	5
KrT95D	CNS	5
Gs2	CNS	5
TpnC73F	CNS	5
CG31235	CNS	5
cin	CNS	6
CG9186	CNS	6
PHGPx	CNS	6
pav	CNS	6
bnb	CNS	6
Ulp1	CNS	6
pcm	CNS	6
brm	CNS	6
AGO2	CNS	6
CG6404	CNS	6
CG8108	CNS	6
Mcr	CNS	6
Aac11	CNS	6
Ect3	CNS	6
CG3689	CNS	6
kis	CNS	6
CG31368	CNS	6
Lis-1	CNS	6
wds	CNS	6
Hsp23	CNS	6
Dref	CNS	6
Tl	CNS	6
CG8003	CNS	6
Arf79F	CNS	6
CG32103	CNS	6
gammaTub37C	CNS	6
woc	CNS	6
CG3605	CNS	6
gro	CNS	6
faf	CNS	6
ras	CNS	6
Trp1	CNS	6
Cam	CNS	6
lid	CNS	6
HmgD	CNS	6
pit	CNS	6
CG14786	CNS	7
Ssrp	CNS	7
dre4	CNS	7
RpII215	CNS	7
Mcm7	CNS	7
Aats-ala	CNS	7
CG4972	CNS	7
CG5355	CNS	7
RnrL	CNS	7
Mcm2	CNS	7
B52	CNS	7
Aats-gln	CNS	7
Sap-r	CNS	7
CG8778	CNS	7
Fpps	CNS	7
Df31	CNS	7
polo	CNS	7
Cnx99A	CNS	7
Fas1	CNS	7
Nop60B	CNS	7
Nrt	CNS	7
ApepP	CNS	7
Top2	CNS	7
His2Av	CNS	7
CG1354	CNS	7
dpa	CNS	7
smt3	CNS	7
lig	CNS	7
Hsp83	CNS	8
Hsc70-4	CNS	8
Cp1	CNS	8
RpS3	CNS	8
sesB	CNS	8
Hsp27	CNS	8
par-6	CNS	9
RhoGAPp190	CNS	9
CG10960	CNS	9
CG3408	CNS	9
tkv	CNS	9
CG4751	CNS	9
CG9601	CNS	9
mfas	CNS	9
CG9286	CNS	9
XNP	CNS	9
Dg	CNS	9
CG8243	CNS	9
Lar	CNS	9
Cap-G	CNS	9
CLIP-190	CNS	9
Sema-1b	CNS	9
Spn	CNS	9
Lasp	CNS	9
vlc	CNS	9
CG8080	CNS	9
PEK	CNS	9
l(3)01239	CNS	9
CG3036	CNS	9
Tsp42Ee	CNS	9
sdk	CNS	9
Ranbp21	CNS	9
fbp	CNS	9
brat	CNS	9
HmgZ	CNS	9
Fas2	CNS	10
Mes2	CNS	10
nrv2	CNS	10
grh	CNS	10
ab	CNS	10
Nrg	CNS	10
Ance	CNS	10
Mipp1	CNS	10
Eip75B	CNS	11
Hr78	CNS	11
CG6126	CNS	11
CG6330	CNS	11
CG10011	CNS	11
Toll-7	CNS	11
Mef2	CNS	11
sm	CNS	11
zfh2	CNS	11
CG6218	CNS	11
sas	CNS	11
rst	CNS	11
or	CNS	12
CG9240	CNS	12
trn	CNS	12
rt	CNS	12
CG13298	CNS	12
CG31320	CNS	12
CG4936	CNS	12
bip2	CNS	12
corn	CNS	12
CG32767	CNS	12
usp	CNS	12
cos	CNS	12
Glycogenin	CNS	12
tun	CNS	12
CG6153	CNS	12
CG31751	CNS	12
fkh	CNS	12
CG12177	CNS	12
CG7692	CNS	12
Cyt-b5-r	crystal cell	1
CG7860	crystal cell	1
Gip	crystal cell	2
ApepP	crystal cell	2
fbp	crystal cell	2
Best1	esophagus	1
CG10936	esophagus	1
CG8213	esophagus	1
CG10249	esophagus	1
CG9850	esophagus	1
CG11873	esophagus	1
CG1572	esophagus	1
Su(Tpl)	esophagus	1
CG12164	esophagus	1
CG11267	esophagus	2
nop5	esophagus	2
Cp1	esophagus	2
eEF1delta	esophagus	3
S2P	esophagus	3
CG30463	esophagus	3
CG4658	esophagus	3
CG31523	esophagus	3
dyl	esophagus	4
CG7272	esophagus	4
CG9628	esophagus	4
Tps1	esophagus	4
Mp20	esophagus	4
ImpL1	esophagus	4
ect	esophagus	4
sas	esophagus	4
CG10211	esophagus	4
CG9747	esophagus	4
rap	esophagus	5
mio	esophagus	5
sca	esophagus	5
Cip4	esophagus	5
fkh	esophagus	5
Mlc-c	esophagus	6
CG6230	esophagus	6
CG2767	esophagus	6
CG5196	esophagus	6
ligatin	esophagus	6
CG8235	esophagus	6
CG7712	esophagus	6
CG3719	fat body	1
GlcAT-I	fat body	1
CG3295	fat body	1
Ca-P60A	fat body	1
Tsp74F	fat body	1
Adgf-A	fat body	1
Aats-gly	fat body	1
CG4942	fat body	1
hoe1	fat body	1
galectin	fat body	1
esc	fat body	1
Syx5	fat body	1
TfIIFbeta	fat body	1
CG9286	fat body	1
CG5447	fat body	1
18w	fat body	1
CG7747	fat body	1
Arf51F	fat body	1
S2P	fat body	1
CG30463	fat body	1
mnd	fat body	1
DIP1	fat body	1
SNF4Agamma	fat body	1
CG4511	fat body	1
bsk	fat body	1
Dl	fat body	1
CG7231	fat body	1
CG17715	fat body	1
CG6073	fat body	1
CG5823	fat body	1
CG12547	fat body	1
Ip259	fat body	1
CG9917	fat body	1
CG12091	fat body	1
Nep2	fat body	1
CG12213	fat body	1
CG13366	fat body	1
Mct1	fat body	1
Idgf3	fat body	1
ytr	fat body	1
CG4658	fat body	1
CG31523	fat body	1
CG7222	fat body	1
fdl	fat body	1
CG2260	fat body	2
CG3163	fat body	2
CG5800	fat body	2
ppl	fat body	2
Ten-m	fat body	2
Pnn	fat body	2
CG11563	fat body	2
CG4866	fat body	2
Asph	fat body	2
CG17493	fat body	2
Ance	fat body	2
glob1	fat body	2
CG6983	fat body	2
Mipp1	fat body	2
CG8677	fat body	2
arg	fat body	3
CG15239	fat body	3
CG2736	fat body	3
ImpE2	fat body	3
CG7272	fat body	3
CG10361	fat body	3
Cg25C	fat body	3
Ccm3	fat body	3
CG5873	fat body	3
Lsd-1	fat body	3
CG13627	fat body	3
Mlc2	fat body	3
Ank2	fat body	3
ect	fat body	3
dp	fat body	3
vkg	fat body	3
CG14814	fat body	4
CG6885	fat body	4
Bsg25A	fat body	4
CG11396	fat body	4
CG10050	fat body	4
mira	fat body	4
sca	fat body	4
didum	fat body	4
CG10035	fat body	4
CG8788	fat body	4
rap	fat body	5
Es2	fat body	5
CG16758	fat body	5
CG1738	fat body	5
Eip75B	fat body	5
CG5021	fat body	5
Tps1	fat body	5
Cyp309a2	fat body	5
Hr78	fat body	5
CG7239	fat body	5
CG9773	fat body	5
pug	fat body	5
CG31121	fat body	5
CG1544	fat body	5
Smvt	fat body	5
CG10465	fat body	5
Sip1	fat body	5
peb	fat body	5
CG6959	fat body	5
Nhe2	fat body	5
Scm	fat body	5
jing	fat body	5
CG2930	fat body	5
CG10338	fat body	5
CG9449	fat body	5
CG9527	fat body	5
ND75	fat body	6
Hsp60	fat body	6
CG11267	fat body	6
yip2	fat body	6
CG3731	fat body	6
Oscp	fat body	6
RpL18A	fat body	6
ERp60	fat body	6
CG1516	fat body	6
Cctgamma	fat body	6
CG4169	fat body	6
Hsp83	fat body	6
Ef1alpha48D	fat body	6
Hsc70-3	fat body	6
CG7461	fat body	6
RpS3	fat body	6
Hsp27	fat body	6
Acon	fat body	6
Tal	fat body	7
RpII215	fat body	7
Pgm	fat body	7
eIF-2beta	fat body	7
l(3)j2D3	fat body	7
CG6230	fat body	7
CG17322	fat body	7
CG6950	fat body	7
CG14516	fat body	7
Aats-cys	fat body	7
CG7639	fat body	7
Roe1	fat body	7
CG11089	fat body	7
ApepP	fat body	7
CG12400	fat body	7
Arf79F	fat body	7
Aats-asn	fat body	7
Nlp	fat body	7
piwi	fat body	7
CG33129	fat body	7
CG4882	fat body	7
CG1703	fat body	7
vib	fat body	7
CG6767	fat body	7
Tapdelta	fat body	7
Coprox	fat body	7
bgm	fat body	7
Swim	fat body	8
CG9503	fat body	8
ftz-f1	fat body	8
Obp83g	fat body	8
svp	fat body	8
CG6040	fat body	8
EcR	fat body	8
Fmo-2	fat body	8
CG8192	fat body	8
CG1674	fat body	8
MESK2	fat body	8
CG1732	fat body	8
CG8213	fat body	8
Eaat1	fat body	8
Cyp49a1	fat body	8
CG5756	fat body	8
CG11873	fat body	8
C3G	fat body	8
CG6337	fat body	8
CG7457	fat body	8
Lsd-2	fat body	9
Cat	fat body	9
mRpS26	fat body	9
CG11811	fat body	9
CG8042	fat body	9
mRpL10	fat body	9
Ddx1	fat body	9
Mms19	fat body	9
CG12375	fat body	9
CG1091	fat body	9
CG8036	fat body	9
Ugt86Da	fat body	9
Surf4	fat body	9
CG7718	fat body	9
CG6937	fat body	9
CG18528	fat body	9
CG3267	fat body	9
CG9436	fat body	9
CG5174	fat body	9
CG7997	fat body	9
CG8235	fat body	9
Gdh	fat body	9
CG3689	fat body	9
Ide	fat body	9
CG17691	fat body	9
Lis-1	fat body	9
wds	fat body	9
CG4042	fat body	9
CG8003	fat body	9
CG7712	fat body	9
NTPase	fat body	9
ras	fat body	9
blp	fat body	9
RpL12	fat body	10
Aats-arg	fat body	10
RpL10Ab	fat body	10
msk	fat body	10
Pdsw	fat body	10
RnrL	fat body	10
CG9603	fat body	10
bel	fat body	10
CG5214	fat body	10
CG5844	fat body	10
CG17337	fat body	10
SdhB	fat body	10
CG4679	fat body	10
CG8778	fat body	10
polo	fat body	10
Adh	fat body	10
Cnx99A	fat body	10
Dhod	fat body	10
CG15093	fat body	10
Nrt	fat body	10
capt	fat body	10
CG6455	fat body	10
CG13850	fat body	10
Nup154	fat body	10
Idgf4	fat body	10
CG9140	fat body	10
l(1)G0230	fat body	10
CkIIalpha	fat body	10
Dp1	fat body	10
RpL24	fat body	10
CG10932	fat body	10
mRpS30	fat body	10
Reg-5	fat body	11
blue	fat body	11
ea	fat body	11
CG7115	fat body	11
CG6293	fat body	11
Tequila	fat body	11
CG32039	fat body	11
CG14629	fat body	12
CG2233	fat body	12
Ero1L	fat body	12
CG6812	fat body	12
rt	fat body	12
Rad17	fat body	12
CG31223	fat body	12
Noa36	fat body	12
CG1750	fat body	12
CG17508	fat body	12
CG6406	fat body	12
CG10265	fat body	12
cid	fat body	12
CG18659	fat body	12
CG8298	fat body	12
Glt	fat body	12
CG7685	fat body	12
Sdc	fat body	12
Su(Tpl)	fat body	12
fws	fat body	12
or	fat body	13
l(3)02640	fat body	13
CG8924	fat body	13
CG7945	fat body	13
CG13298	fat body	13
ft	fat body	13
CG9641	fat body	13
mio	fat body	13
CG12975	fat body	13
bib	fat body	13
CG2608	fat body	13
CG4203	fat body	13
CaMKI	fat body	13
Taf7	fat body	13
CG13384	fat body	13
Vps28	fat body	13
shn	fat body	13
CG32767	fat body	13
CG4078	fat body	13
usp	fat body	13
CG9922	fat body	13
WASp	fat body	13
CG10555	fat body	13
eas	fat body	13
Fas2	fat body	14
Oat	fat body	14
LanA	fat body	14
CG5958	fat body	14
Cyp6d5	fat body	14
CG7470	fat body	14
cin	fat body	15
Mlc-c	fat body	15
CG12006	fat body	15
CG11583	fat body	15
CG9629	fat body	15
Sep1	fat body	15
Srp54	fat body	15
CG4500	fat body	15
Ama	fat body	15
hyd	fat body	15
SF1	fat body	15
Dys	fat body	15
Sep2	fat body	15
CG1951	fat body	15
CstF-50	fat body	15
Su(var)2-HP2	fat body	15
drk	fat body	15
CG30349	fat body	15
rl	fat body	15
pit	fat body	15
fs(1)N	fat body	16
bcn92	fat body	16
Caf1-180	fat body	16
CG17746	fat body	16
feo	fat body	16
l(1)10Bb	fat body	16
CG32576	fat body	16
par-6	fat body	16
RhoGAPp190	fat body	16
CG4573	fat body	16
Mad	fat body	16
ECSIT	fat body	16
KdelR	fat body	16
Orc5	fat body	16
CG5861	fat body	16
CG33116	fat body	16
CG5196	fat body	16
CG12360	fat body	16
CG18012	fat body	16
DNaseII	fat body	16
CHORD	fat body	16
Act42A	fat body	16
Jheh1	fat body	16
CG30493	fat body	16
CG11077	fat body	16
CG30118	fat body	16
CG5919	fat body	16
CG3437	fat body	16
Prat	fat body	16
CG32075	fat body	16
vlc	fat body	16
CG8080	fat body	16
zpg	fat body	16
CG9921	fat body	16
Rab35	fat body	16
l(2)09851	fat body	16
Tsp42Ee	fat body	16
CG9667	fat body	16
CG8370	fat body	16
fbp	fat body	16
brat	fat body	16
Rrp6	fat body	16
nahoda	Foregut	1
ken	Foregut	1
dyl	Foregut	1
CG9628	Foregut	1
Tps1	Foregut	1
ea	Foregut	1
CG5873	Foregut	1
CG6330	Foregut	1
CG10936	Foregut	1
CG8213	Foregut	1
CG6967	Foregut	1
ImpL1	Foregut	1
CG10249	Foregut	1
sd	Foregut	1
ect	Foregut	1
CG9747	Foregut	1
nop5	Foregut	2
ERp60	Foregut	2
Cp1	Foregut	2
Jafrac1	Foregut	2
Hsc70-3	Foregut	2
Fas2	Foregut	3
CG10960	Foregut	3
mTTF	Foregut	3
CG2767	Foregut	3
ligatin	Foregut	3
dia	Foregut	3
trn	Foregut	4
eEF1delta	Foregut	4
S2P	Foregut	4
pgant3	Foregut	4
Cip4	Foregut	4
CG31523	Foregut	4
Osi6	Foregut	4
CG14476	garland cell	1
CG4692	garland cell	1
Ccm3	garland cell	2
pgant3	garland cell	2
cos	garland cell	2
CG10254	gonad	1
CG10249	gonad	1
pain	gonad	1
Tequila	gonad	1
CG9747	gonad	1
Bub1	gonad	1
Ssrp	gonad	2
dre4	gonad	2
RpII215	gonad	2
msk	gonad	2
Aos1	gonad	2
B52	gonad	2
CG14516	gonad	2
CG8778	gonad	2
polo	gonad	2
capt	gonad	2
Nlp	gonad	2
CG4882	gonad	2
smt3	gonad	2
CG5800	gonad	3
CG6891	gonad	3
AP-1sigma	gonad	3
stc	gonad	3
Trf2	gonad	3
CG9922	gonad	3
CG7692	gonad	3
pav	gonad	4
Ulp1	gonad	4
CG3523	gonad	4
ECSIT	gonad	4
hyd	gonad	4
CG12129	gonad	4
zpg	gonad	4
l(2)09851	gonad	4
CG13366	gonad	4
CG14476	gonad	5
Cct5	gonad	5
Nap1	gonad	5
Cp1	gonad	5
Jafrac1	gonad	5
RpS3	gonad	5
CG13295	heart	1
Bsg25A	heart	1
CG9503	heart	2
blue	heart	2
CG7239	heart	2
CG4203	heart	2
CG31121	heart	2
Mlc2	heart	2
CG6959	heart	2
CG10338	heart	2
Caf1-180	heart	3
CG9253	heart	3
Dys	heart	3
brat	heart	3
blp	heart	3
ERp60	hemocytes	1
CG1516	hemocytes	1
Cp1	hemocytes	1
Hsc70-3	hemocytes	1
Dp1	hemocytes	1
Hsp27	hemocytes	1
GlcAT-I	hemocytes	2
CG5800	hemocytes	2
CG6310	hemocytes	2
sgl	hemocytes	2
LanA	hemocytes	2
KdelR	hemocytes	2
SCAR	hemocytes	2
CG5854	hemocytes	2
vimar	hemocytes	2
CG12128	hemocytes	2
CG8602	hemocytes	2
CG3036	hemocytes	2
Top3beta	hemocytes	2
Akap200	hemocytes	2
fbp	hemocytes	2
LanB2	hemocytes	2
CG9119	hemocytes	3
Pxn	hemocytes	3
lin-28	hemocytes	3
Cg25C	hemocytes	3
RhoL	hemocytes	3
Mef2	hemocytes	3
CG11905	hemocytes	3
Pvr	hemocytes	3
Ppn	hemocytes	3
CG10249	hemocytes	3
CG9171	hemocytes	3
CG9338	hemocytes	3
CG1092	hemocytes	3
CG7860	hemocytes	3
CG14629	hemocytes	4
mio	hemocytes	4
Glt	hemocytes	4
mol	hemocytes	4
vkg	hemocytes	4
Prosap	hemocytes	4
lt	hemocytes	4
Tequila	hemocytes	4
CG7692	hemocytes	4
CBP	hemocytes	5
CG4164	hemocytes	5
CG10470	hemocytes	5
Past1	hemocytes	5
Sap-r	hemocytes	5
CG8778	hemocytes	5
crq	hemocytes	5
CG33129	hemocytes	5
Swim	Hindgut	1
nahoda	Hindgut	1
ftz-f1	Hindgut	1
Osi14	Hindgut	1
ea	Hindgut	1
CG6040	Hindgut	1
CG31343	Hindgut	1
EcR	Hindgut	1
Fmo-2	Hindgut	1
CG10936	Hindgut	1
CG1674	Hindgut	1
tinc	Hindgut	1
CG8213	Hindgut	1
CG6967	Hindgut	1
CG10249	Hindgut	1
Eaat1	Hindgut	1
Cyp49a1	Hindgut	1
CG9265	Hindgut	1
zormin	Hindgut	1
mas	Hindgut	1
Glut1	Hindgut	1
RhoGEF3	Hindgut	1
CG1572	Hindgut	1
CG12164	Hindgut	1
CG6337	Hindgut	1
ft	Hindgut	2
yellow-e3	Hindgut	2
CG6654	Hindgut	2
Sip1	Hindgut	2
CG30015	Hindgut	2
Nhe2	Hindgut	2
CG13384	Hindgut	2
msl-1	Hindgut	2
CG9512	Hindgut	2
CG31751	Hindgut	2
Ugt36Bc	Hindgut	2
CG12177	Hindgut	2
CG1273	Hindgut	3
dyl	Hindgut	3
CG9628	Hindgut	3
blue	Hindgut	3
CG5873	Hindgut	3
Tsp42Ea	Hindgut	3
ImpL1	Hindgut	3
Ect4	Hindgut	3
sd	Hindgut	3
ect	Hindgut	3
dp	Hindgut	3
dsd	Hindgut	3
CG13506	Hindgut	3
CG10211	Hindgut	3
CG9747	Hindgut	3
Tal	Hindgut	4
CG13900	Hindgut	4
Aats-arg	Hindgut	4
Pgm	Hindgut	4
brm	Hindgut	4
eIF-2beta	Hindgut	4
FK506-bp2	Hindgut	4
ApepP	Hindgut	4
Rab7	Hindgut	4
Arf79F	Hindgut	4
kst	Hindgut	4
capt	Hindgut	4
Aats-asn	Hindgut	4
Nlp	Hindgut	4
CG13850	Hindgut	4
CG4882	Hindgut	4
vib	Hindgut	4
CG6767	Hindgut	4
Nacalpha	Hindgut	4
dpa	Hindgut	4
Tapdelta	Hindgut	4
Tim10	Hindgut	5
mu2	Hindgut	5
CG1265	Hindgut	5
CG6812	Hindgut	5
eEF1delta	Hindgut	5
alpha-Est5	Hindgut	5
ldlCp	Hindgut	5
CG5555	Hindgut	5
AP-1sigma	Hindgut	5
CG17508	Hindgut	5
SNF4Agamma	Hindgut	5
CG8298	Hindgut	5
wun	Hindgut	5
Glt	Hindgut	5
stc	Hindgut	5
miple2	Hindgut	5
Sdc	Hindgut	5
CG6650	Hindgut	5
CG7675	Hindgut	5
Osi6	Hindgut	5
fws	Hindgut	5
CG3719	Hindgut	6
GlcAT-I	Hindgut	6
CG32732	Hindgut	6
CG3295	Hindgut	6
Ca-P60A	Hindgut	6
CG16985	Hindgut	6
CG32576	Hindgut	6
Tsp74F	Hindgut	6
Cyp6t1	Hindgut	6
hoe1	Hindgut	6
Mad	Hindgut	6
CG15390	Hindgut	6
CG7289	Hindgut	6
CG7458	Hindgut	6
Grip71	Hindgut	6
CG10194	Hindgut	6
MAGE	Hindgut	6
CG10286	Hindgut	6
CG5447	Hindgut	6
CG5335	Hindgut	6
CG7747	Hindgut	6
S2P	Hindgut	6
CG11825	Hindgut	6
CG12129	Hindgut	6
aft	Hindgut	6
ref(2)P	Hindgut	6
DIP1	Hindgut	6
CG4511	Hindgut	6
Dl	Hindgut	6
CG7231	Hindgut	6
CG17715	Hindgut	6
Mbs	Hindgut	6
Cpr	Hindgut	6
CG11306	Hindgut	6
Nep2	Hindgut	6
CG9667	Hindgut	6
Mct1	Hindgut	6
ytr	Hindgut	6
CG4658	Hindgut	6
CG7222	Hindgut	6
fdl	Hindgut	6
CG4302	Hindgut	7
CG1738	Hindgut	7
CG6891	Hindgut	7
Eip75B	Hindgut	7
D19A	Hindgut	7
Hr78	Hindgut	7
CG6126	Hindgut	7
CG7702	Hindgut	7
CG31121	Hindgut	7
CG10011	Hindgut	7
CG10465	Hindgut	7
cpo	Hindgut	7
CG18088	Hindgut	7
zfh2	Hindgut	7
sas	Hindgut	7
CG2930	Hindgut	7
CG10338	Hindgut	7
CG9449	Hindgut	7
CG13321	Hindgut	7
CG9527	Hindgut	7
ND75	Hindgut	8
CG7033	Hindgut	8
Hsp60	Hindgut	8
CG5525	Hindgut	8
bel	Hindgut	8
Oscp	Hindgut	8
RpL18A	Hindgut	8
Cct5	Hindgut	8
CG1516	Hindgut	8
Cctgamma	Hindgut	8
Scsalpha	Hindgut	8
CG7430	Hindgut	8
Chc	Hindgut	8
ATPsyn-beta	Hindgut	8
Hsc70-3	Hindgut	8
CG7461	Hindgut	8
RpS3	Hindgut	8
l(2)37Cc	Hindgut	8
l(1)G0193	Hindgut	9
CG17068	Hindgut	9
CG11396	Hindgut	9
mira	Hindgut	9
sca	Hindgut	9
didum	Hindgut	9
CG10035	Hindgut	9
CG9578	Hindgut	10
c12.1	Hindgut	10
or	Hindgut	10
Nxt1	Hindgut	10
l(3)02640	Hindgut	10
PDCD-5	Hindgut	10
trn	Hindgut	10
mio	Hindgut	10
Oatp30B	Hindgut	10
CG15160	Hindgut	10
Cip4	Hindgut	10
l(2)05714	Hindgut	10
CG32767	Hindgut	10
usp	Hindgut	10
btsz	Hindgut	10
CG9922	Hindgut	10
WASp	Hindgut	10
CG6153	Hindgut	10
CG11555	Hindgut	10
sktl	Hindgut	10
fkh	Hindgut	10
mRpL30	Hindgut	11
bonsai	Hindgut	11
mRpL46	Hindgut	11
mge	Hindgut	11
Ulp1	Hindgut	11
pcm	Hindgut	11
Cat	Hindgut	11
mRpS26	Hindgut	11
CG6404	Hindgut	11
Srp54k	Hindgut	11
mRpL10	Hindgut	11
Mcr	Hindgut	11
Srp54	Hindgut	11
CG6230	Hindgut	11
CG1091	Hindgut	11
Ugt86Da	Hindgut	11
CG17726	Hindgut	11
Surf4	Hindgut	11
CG14516	Hindgut	11
CG3267	Hindgut	11
Ide	Hindgut	11
CG17691	Hindgut	11
wds	Hindgut	11
CG12400	Hindgut	11
CG8003	Hindgut	11
CG7441	Hindgut	11
CG7712	Hindgut	11
NTPase	Hindgut	11
Eb1	Hindgut	11
CG33129	Hindgut	11
HmgD	Hindgut	11
Fas2	Hindgut	12
CG9629	Hindgut	12
CG31002	Hindgut	12
Nrg	Hindgut	12
LanB2	Hindgut	12
CG5800	Hindgut	13
CG13298	Hindgut	13
CG32409	Hindgut	13
ppl	Hindgut	13
Ten-m	Hindgut	13
Pnn	Hindgut	13
SF1	Hindgut	13
Dlc90F	Hindgut	13
CG12128	Hindgut	13
bip2	Hindgut	13
nrv2	Hindgut	13
Taf7	Hindgut	13
CG4078	Hindgut	13
CG17493	Hindgut	13
Ance	Hindgut	13
cin	Hindgut	14
l(1)10Bb	Hindgut	14
Lsd-2	Hindgut	14
par-6	Hindgut	14
nes	Hindgut	14
Baldspot	Hindgut	14
CG3523	Hindgut	14
ECSIT	Hindgut	14
KdelR	Hindgut	14
CG5861	Hindgut	14
CG2767	Hindgut	14
CG12360	Hindgut	14
Set	Hindgut	14
sds22	Hindgut	14
ligatin	Hindgut	14
drk	Hindgut	14
CG30493	Hindgut	14
U2A	Hindgut	14
hrg	Hindgut	14
Sema-1b	Hindgut	14
vlc	Hindgut	14
CG7970	Hindgut	14
Rpb5	Hindgut	14
Rab35	Hindgut	14
CG10092	Hindgut	14
dia	Hindgut	14
l(2)09851	Hindgut	14
Tsp42Ee	Hindgut	14
mys	Hindgut	14
sdk	Hindgut	14
Akap200	Hindgut	14
rl	Hindgut	14
CG12125	Hindgut	14
RpL12	Hindgut	15
CG4692	Hindgut	15
msk	Hindgut	15
RnrL	Hindgut	15
mRpL19	Hindgut	15
CG5214	Hindgut	15
CG17337	Hindgut	15
SdhB	Hindgut	15
CG4679	Hindgut	15
bic	Hindgut	15
polo	Hindgut	15
Cnx99A	Hindgut	15
Nop60B	Hindgut	15
Tom40	Hindgut	15
Vha68-2	Hindgut	15
RpL24	Hindgut	15
Vha26	Hindgut	15
mRpS30	Hindgut	15
CG2260	Imaginal discs	1
Oat	Imaginal discs	1
ppl	Imaginal discs	1
Bka	Imaginal discs	1
CG15160	Imaginal discs	1
Pnn	Imaginal discs	1
CG4866	Imaginal discs	1
Asph	Imaginal discs	1
CG17493	Imaginal discs	1
Ance	Imaginal discs	1
CG8677	Imaginal discs	1
Swim	Imaginal discs	2
CG15731	Imaginal discs	2
CG9503	Imaginal discs	2
CG6885	Imaginal discs	2
ftz-f1	Imaginal discs	2
CG11396	Imaginal discs	2
CG10050	Imaginal discs	2
svp	Imaginal discs	2
CG6040	Imaginal discs	2
CG13627	Imaginal discs	2
EcR	Imaginal discs	2
CG10936	Imaginal discs	2
CG1674	Imaginal discs	2
MESK2	Imaginal discs	2
CG1732	Imaginal discs	2
CG11873	Imaginal discs	2
ect	Imaginal discs	2
C3G	Imaginal discs	2
Sirt2	Imaginal discs	2
CG14814	Imaginal discs	3
CG4476	Imaginal discs	3
CG13295	Imaginal discs	3
Bsg25A	Imaginal discs	3
CG6293	Imaginal discs	3
Picot	Imaginal discs	3
Su(Tpl)	Imaginal discs	3
CG32039	Imaginal discs	3
RpL12	Imaginal discs	4
CG13900	Imaginal discs	4
eIF-2beta	Imaginal discs	4
Pdsw	Imaginal discs	4
CG9603	Imaginal discs	4
CG5214	Imaginal discs	4
CG5844	Imaginal discs	4
Roe1	Imaginal discs	4
CG8778	Imaginal discs	4
polo	Imaginal discs	4
Adh	Imaginal discs	4
CG15093	Imaginal discs	4
ApepP	Imaginal discs	4
CG32230	Imaginal discs	4
Vha68-2	Imaginal discs	4
CG9140	Imaginal discs	4
RpL24	Imaginal discs	4
CG15239	Imaginal discs	5
Es2	Imaginal discs	5
ImpE2	Imaginal discs	5
CG1738	Imaginal discs	5
Eip75B	Imaginal discs	5
CG10361	Imaginal discs	5
CG5021	Imaginal discs	5
D19A	Imaginal discs	5
Cyp309a2	Imaginal discs	5
Hr78	Imaginal discs	5
Cg25C	Imaginal discs	5
CG7239	Imaginal discs	5
Ccm3	Imaginal discs	5
CG31121	Imaginal discs	5
Mlc2	Imaginal discs	5
peb	Imaginal discs	5
Ank2	Imaginal discs	5
Scm	Imaginal discs	5
cpo	Imaginal discs	5
CG9380	Imaginal discs	5
CG9449	Imaginal discs	5
mRpS17	Imaginal discs	6
mRpL46	Imaginal discs	6
Cat	Imaginal discs	6
mRpS26	Imaginal discs	6
Pgm	Imaginal discs	6
l(3)j2D3	Imaginal discs	6
Ddx1	Imaginal discs	6
CG17322	Imaginal discs	6
l(2)37Bb	Imaginal discs	6
CG1091	Imaginal discs	6
CG8036	Imaginal discs	6
Ugt86Da	Imaginal discs	6
CG14516	Imaginal discs	6
CG3267	Imaginal discs	6
CG7997	Imaginal discs	6
CG7639	Imaginal discs	6
CG8235	Imaginal discs	6
Gdh	Imaginal discs	6
Ide	Imaginal discs	6
CG17691	Imaginal discs	6
Lis-1	Imaginal discs	6
CG12400	Imaginal discs	6
CG33129	Imaginal discs	6
bgm	Imaginal discs	6
Ero1L	Imaginal discs	7
CG6812	Imaginal discs	7
Cyp6t1	Imaginal discs	7
Irbp	Imaginal discs	7
Rad17	Imaginal discs	7
CG31223	Imaginal discs	7
CG10265	Imaginal discs	7
cid	Imaginal discs	7
S2P	Imaginal discs	7
phr	Imaginal discs	7
Cyp6d5	Imaginal discs	7
CG8298	Imaginal discs	7
Glt	Imaginal discs	7
CG11737	Imaginal discs	7
Mct1	Imaginal discs	7
cin	Imaginal discs	8
fs(1)N	Imaginal discs	8
Caf1-180	Imaginal discs	8
CG17746	Imaginal discs	8
CG12006	Imaginal discs	8
l(1)10Bb	Imaginal discs	8
RhoGAPp190	Imaginal discs	8
Sep1	Imaginal discs	8
ECSIT	Imaginal discs	8
Srp54	Imaginal discs	8
CG4500	Imaginal discs	8
Ama	Imaginal discs	8
hyd	Imaginal discs	8
CG12360	Imaginal discs	8
Su(var)3-7	Imaginal discs	8
SF1	Imaginal discs	8
Dys	Imaginal discs	8
Sep2	Imaginal discs	8
Act42A	Imaginal discs	8
drk	Imaginal discs	8
CG30493	Imaginal discs	8
hrg	Imaginal discs	8
Prat	Imaginal discs	8
vlc	Imaginal discs	8
cl	Imaginal discs	8
zpg	Imaginal discs	8
snRNP-U1-70K	Imaginal discs	8
Rpb5	Imaginal discs	8
TfIIB	Imaginal discs	8
Rab35	Imaginal discs	8
Hexo1	Imaginal discs	8
CG10092	Imaginal discs	8
l(2)09851	Imaginal discs	8
Tsp42Ee	Imaginal discs	8
blp	Imaginal discs	8
rl	Imaginal discs	8
Rrp6	Imaginal discs	8
CG8924	Imaginal discs	9
sip2	Imaginal discs	9
bib	Imaginal discs	9
mira	Imaginal discs	9
sca	Imaginal discs	9
didum	Imaginal discs	9
rap	Imaginal discs	10
or	Imaginal discs	10
Nxt1	Imaginal discs	10
CG6179	Imaginal discs	10
PDCD-5	Imaginal discs	10
CG7945	Imaginal discs	10
ft	Imaginal discs	10
CG2608	Imaginal discs	10
Smvt	Imaginal discs	10
CaMKI	Imaginal discs	10
CG13384	Imaginal discs	10
l(3)73Ah	Imaginal discs	10
Vps28	Imaginal discs	10
shn	Imaginal discs	10
usp	Imaginal discs	10
WASp	Imaginal discs	10
eas	Imaginal discs	10
CG12177	Imaginal discs	10
ND75	Imaginal discs	11
Hsp60	Imaginal discs	11
CG11267	Imaginal discs	11
yip2	Imaginal discs	11
bel	Imaginal discs	11
CG3731	Imaginal discs	11
Oscp	Imaginal discs	11
ERp60	Imaginal discs	11
CG1516	Imaginal discs	11
Cctgamma	Imaginal discs	11
CG4169	Imaginal discs	11
CG33303	Imaginal discs	11
Hsp83	Imaginal discs	11
RpS7	Imaginal discs	11
Ef1alpha48D	Imaginal discs	11
Hsp27	Imaginal discs	11
GlcAT-I	Imaginal discs	12
CG16787	Imaginal discs	12
feo	Imaginal discs	12
CG32576	Imaginal discs	12
hoe1	Imaginal discs	12
Mad	Imaginal discs	12
CG15390	Imaginal discs	12
galectin	Imaginal discs	12
esc	Imaginal discs	12
Orc5	Imaginal discs	12
Syx5	Imaginal discs	12
CG33116	Imaginal discs	12
CG9253	Imaginal discs	12
CG5196	Imaginal discs	12
18w	Imaginal discs	12
CG30463	Imaginal discs	12
mnd	Imaginal discs	12
DIP1	Imaginal discs	12
CG4511	Imaginal discs	12
bsk	Imaginal discs	12
Dl	Imaginal discs	12
CG9391	Imaginal discs	12
CG32075	Imaginal discs	12
CG9917	Imaginal discs	12
CG9921	Imaginal discs	12
CG12213	Imaginal discs	12
CG4658	Imaginal discs	12
brat	Imaginal discs	12
HmgZ	Imaginal discs	12
CG7222	Imaginal discs	12
fdl	Imaginal discs	12
CG15731	lymph glands	1
CG9503	lymph glands	1
ftz-f1	lymph glands	1
Obp83g	lymph glands	1
CG10050	lymph glands	1
svp	lymph glands	1
CG13627	lymph glands	1
EcR	lymph glands	1
CG10936	lymph glands	1
CG8192	lymph glands	1
MESK2	lymph glands	1
CG1732	lymph glands	1
Cyp49a1	lymph glands	1
CG2016	lymph glands	1
CG9265	lymph glands	1
ect	lymph glands	1
C3G	lymph glands	1
Sirt2	lymph glands	1
CG7457	lymph glands	1
mRpS17	lymph glands	2
Pgm	lymph glands	2
CG11811	lymph glands	2
Sep1	lymph glands	2
Ddx1	lymph glands	2
Srp54	lymph glands	2
Ama	lymph glands	2
CG1091	lymph glands	2
hyd	lymph glands	2
Ugt86Da	lymph glands	2
CG7718	lymph glands	2
CG6937	lymph glands	2
FK506-bp2	lymph glands	2
CG7997	lymph glands	2
Gdh	lymph glands	2
CG3689	lymph glands	2
Ide	lymph glands	2
CG12400	lymph glands	2
cl	lymph glands	2
NTPase	lymph glands	2
CG33129	lymph glands	2
CG1703	lymph glands	2
bgm	lymph glands	2
CG14814	lymph glands	3
CG13295	lymph glands	3
Bsg25A	lymph glands	3
ea	lymph glands	3
CG6293	lymph glands	3
Picot	lymph glands	3
Su(Tpl)	lymph glands	3
rap	lymph glands	4
Es2	lymph glands	4
ImpE2	lymph glands	4
CG1738	lymph glands	4
Eip75B	lymph glands	4
blue	lymph glands	4
CG10361	lymph glands	4
rt	lymph glands	4
CG5021	lymph glands	4
D19A	lymph glands	4
Cg25C	lymph glands	4
CG7239	lymph glands	4
CG31121	lymph glands	4
CG10465	lymph glands	4
Mlc2	lymph glands	4
peb	lymph glands	4
CG6959	lymph glands	4
Nhe2	lymph glands	4
Ank2	lymph glands	4
Con	lymph glands	4
CG18088	lymph glands	4
CG9380	lymph glands	4
CG10338	lymph glands	4
CG9449	lymph glands	4
ND75	lymph glands	5
Hsp60	lymph glands	5
CG11267	lymph glands	5
yip2	lymph glands	5
bel	lymph glands	5
CG3731	lymph glands	5
Oscp	lymph glands	5
ERp60	lymph glands	5
CG1516	lymph glands	5
CG4169	lymph glands	5
CG33303	lymph glands	5
Hsp83	lymph glands	5
Vha68-2	lymph glands	5
RpS7	lymph glands	5
Hsp27	lymph glands	5
Acon	lymph glands	5
GlcAT-I	lymph glands	6
Ca-P60A	lymph glands	6
mus101	lymph glands	6
CG32576	lymph glands	6
CG6812	lymph glands	6
Tsp74F	lymph glands	6
CG4942	lymph glands	6
Cyp6t1	lymph glands	6
hoe1	lymph glands	6
CG7289	lymph glands	6
galectin	lymph glands	6
esc	lymph glands	6
Orc5	lymph glands	6
Syx5	lymph glands	6
CG33116	lymph glands	6
CG5196	lymph glands	6
CG31223	lymph glands	6
CG5447	lymph glands	6
18w	lymph glands	6
CG6406	lymph glands	6
mnd	lymph glands	6
DIP1	lymph glands	6
CG4511	lymph glands	6
Dl	lymph glands	6
CG9391	lymph glands	6
CG32075	lymph glands	6
CG7231	lymph glands	6
Glt	lymph glands	6
CG11737	lymph glands	6
CG5823	lymph glands	6
CG9917	lymph glands	6
CG7685	lymph glands	6
CG12213	lymph glands	6
CG9667	lymph glands	6
Mct1	lymph glands	6
ytr	lymph glands	6
CG4658	lymph glands	6
brat	lymph glands	6
CG7222	lymph glands	6
Oat	lymph glands	7
Cyp309a2	lymph glands	7
Hr78	lymph glands	7
CG31002	lymph glands	7
Cyp6d5	lymph glands	7
CG7470	lymph glands	7
CG13900	lymph glands	8
Aats-arg	lymph glands	8
eIF-2beta	lymph glands	8
msk	lymph glands	8
Pdsw	lymph glands	8
CG17322	lymph glands	8
CG9603	lymph glands	8
CG5214	lymph glands	8
CG5844	lymph glands	8
CG8778	lymph glands	8
Dhod	lymph glands	8
CG11089	lymph glands	8
CG15093	lymph glands	8
ApepP	lymph glands	8
CG32230	lymph glands	8
CkIIalpha	lymph glands	8
or	lymph glands	9
CG8924	lymph glands	9
PDCD-5	lymph glands	9
CG7945	lymph glands	9
ft	lymph glands	9
ppl	lymph glands	9
bib	lymph glands	9
CG2608	lymph glands	9
Asph	lymph glands	9
cid	lymph glands	9
CaMKI	lymph glands	9
l(3)73Ah	lymph glands	9
Vps28	lymph glands	9
shn	lymph glands	9
CG17493	lymph glands	9
usp	lymph glands	9
CG9922	lymph glands	9
CG10555	lymph glands	9
CG6885	lymph glands	10
CG11396	lymph glands	10
mira	lymph glands	10
sca	lymph glands	10
didum	lymph glands	10
CG10035	lymph glands	10
CG2260	lymph glands	11
CG5800	lymph glands	11
CG13298	lymph glands	11
Ten-m	lymph glands	11
Pnn	lymph glands	11
CG4203	lymph glands	11
CG11563	lymph glands	11
Taf7	lymph glands	11
CG4078	lymph glands	11
CG8677	lymph glands	11
cin	lymph glands	12
fs(1)N	lymph glands	12
Caf1-180	lymph glands	12
CG17746	lymph glands	12
CG12006	lymph glands	12
l(1)10Bb	lymph glands	12
par-6	lymph glands	12
RhoGAPp190	lymph glands	12
ECSIT	lymph glands	12
CG4500	lymph glands	12
CG5861	lymph glands	12
CG9253	lymph glands	12
CG12360	lymph glands	12
Su(var)3-7	lymph glands	12
Dys	lymph glands	12
Act42A	lymph glands	12
drk	lymph glands	12
CG30493	lymph glands	12
hrg	lymph glands	12
CG5919	lymph glands	12
Prat	lymph glands	12
vlc	lymph glands	12
CG4042	lymph glands	12
snRNP-U1-70K	lymph glands	12
Rpb5	lymph glands	12
CG9921	lymph glands	12
TfIIB	lymph glands	12
Rab35	lymph glands	12
Tsp42Ee	lymph glands	12
mRpL49	lymph glands	12
blp	lymph glands	12
rl	lymph glands	12
Rrp6	lymph glands	12
Fas2	Malpighian tubules	1
CG2260	Malpighian tubules	1
CG5800	Malpighian tubules	1
Oat	Malpighian tubules	1
CG13298	Malpighian tubules	1
Ten-m	Malpighian tubules	1
CG15160	Malpighian tubules	1
Pnn	Malpighian tubules	1
CG17493	Malpighian tubules	1
Ance	Malpighian tubules	1
CG11396	Malpighian tubules	2
CG10050	Malpighian tubules	2
sca	Malpighian tubules	2
didum	Malpighian tubules	2
CG8788	Malpighian tubules	2
CG13295	Malpighian tubules	3
Bsg25A	Malpighian tubules	3
ea	Malpighian tubules	3
CG7115	Malpighian tubules	3
Tequila	Malpighian tubules	3
CG32039	Malpighian tubules	3
CG6891	Malpighian tubules	4
Eip75B	Malpighian tubules	4
CG5021	Malpighian tubules	4
Hr78	Malpighian tubules	4
CG7702	Malpighian tubules	4
CG31121	Malpighian tubules	4
CG1544	Malpighian tubules	4
CG10465	Malpighian tubules	4
Cyp6d5	Malpighian tubules	4
sm	Malpighian tubules	4
cpo	Malpighian tubules	4
CG18088	Malpighian tubules	4
CG9449	Malpighian tubules	4
CG9527	Malpighian tubules	4
Aats-arg	Malpighian tubules	5
Pdsw	Malpighian tubules	5
CG9603	Malpighian tubules	5
CG5214	Malpighian tubules	5
CG5844	Malpighian tubules	5
SdhB	Malpighian tubules	5
CG4679	Malpighian tubules	5
polo	Malpighian tubules	5
ApepP	Malpighian tubules	5
Tom40	Malpighian tubules	5
Nup154	Malpighian tubules	5
l(1)G0230	Malpighian tubules	5
Vha26	Malpighian tubules	5
Es2	Malpighian tubules	6
CG9119	Malpighian tubules	6
ftz-f1	Malpighian tubules	6
CG7272	Malpighian tubules	6
CG9628	Malpighian tubules	6
blue	Malpighian tubules	6
svp	Malpighian tubules	6
CG6040	Malpighian tubules	6
CG13827	Malpighian tubules	6
EcR	Malpighian tubules	6
CG10936	Malpighian tubules	6
CG1674	Malpighian tubules	6
peb	Malpighian tubules	6
CG6959	Malpighian tubules	6
Eaat1	Malpighian tubules	6
CG2016	Malpighian tubules	6
CG5756	Malpighian tubules	6
CG9265	Malpighian tubules	6
ect	Malpighian tubules	6
mas	Malpighian tubules	6
CG9380	Malpighian tubules	6
C3G	Malpighian tubules	6
Sirt2	Malpighian tubules	6
CG5973	Malpighian tubules	6
CG6337	Malpighian tubules	6
CG7457	Malpighian tubules	6
GlcAT-I	Malpighian tubules	7
Tim10	Malpighian tubules	7
CG13890	Malpighian tubules	7
CG16985	Malpighian tubules	7
CG12093	Malpighian tubules	7
CG32576	Malpighian tubules	7
Chd3	Malpighian tubules	7
CG6812	Malpighian tubules	7
Tsp74F	Malpighian tubules	7
CG4942	Malpighian tubules	7
Cyp6t1	Malpighian tubules	7
CG15390	Malpighian tubules	7
CG7289	Malpighian tubules	7
galectin	Malpighian tubules	7
esc	Malpighian tubules	7
Orc5	Malpighian tubules	7
Syx5	Malpighian tubules	7
CG33116	Malpighian tubules	7
MAGE	Malpighian tubules	7
CG5196	Malpighian tubules	7
CG5447	Malpighian tubules	7
CG17508	Malpighian tubules	7
18w	Malpighian tubules	7
CG11825	Malpighian tubules	7
CG30463	Malpighian tubules	7
DIP1	Malpighian tubules	7
SNF4Agamma	Malpighian tubules	7
CG4511	Malpighian tubules	7
Dl	Malpighian tubules	7
CG9391	Malpighian tubules	7
wun	Malpighian tubules	7
CG7231	Malpighian tubules	7
CG11737	Malpighian tubules	7
CG9917	Malpighian tubules	7
CG11306	Malpighian tubules	7
CG12213	Malpighian tubules	7
Mct1	Malpighian tubules	7
Sdc	Malpighian tubules	7
ytr	Malpighian tubules	7
CG4658	Malpighian tubules	7
Lsp2	Malpighian tubules	7
CG7222	Malpighian tubules	7
CG9330	Malpighian tubules	8
Cat	Malpighian tubules	8
mRpS26	Malpighian tubules	8
Pgm	Malpighian tubules	8
eIF-2beta	Malpighian tubules	8
Sep1	Malpighian tubules	8
Srp54	Malpighian tubules	8
l(2)35Df	Malpighian tubules	8
CG17322	Malpighian tubules	8
CG8036	Malpighian tubules	8
hyd	Malpighian tubules	8
Ugt86Da	Malpighian tubules	8
CG3267	Malpighian tubules	8
FK506-bp2	Malpighian tubules	8
Aats-cys	Malpighian tubules	8
Roe1	Malpighian tubules	8
CG8235	Malpighian tubules	8
CG3689	Malpighian tubules	8
Ide	Malpighian tubules	8
CG17691	Malpighian tubules	8
wds	Malpighian tubules	8
CG12400	Malpighian tubules	8
Aats-asn	Malpighian tubules	8
CG3702	Malpighian tubules	8
CG33129	Malpighian tubules	8
CG9578	Malpighian tubules	9
rap	Malpighian tubules	9
or	Malpighian tubules	9
Nxt1	Malpighian tubules	9
l(3)02640	Malpighian tubules	9
PDCD-5	Malpighian tubules	9
ft	Malpighian tubules	9
CG9641	Malpighian tubules	9
CG2608	Malpighian tubules	9
CG9773	Malpighian tubules	9
Rad17	Malpighian tubules	9
CG4203	Malpighian tubules	9
CaMKI	Malpighian tubules	9
Taf7	Malpighian tubules	9
CG13384	Malpighian tubules	9
CG4078	Malpighian tubules	9
usp	Malpighian tubules	9
WASp	Malpighian tubules	9
CG10555	Malpighian tubules	9
eas	Malpighian tubules	9
CG31751	Malpighian tubules	9
fkh	Malpighian tubules	9
[truncated: 2,192 more rows]
