# Supplementary material for: The developmental proteome of Drosophila melanogaster
Source: HighWire-hosted journal article supplement (doi:10.1101/gr.213694.116), 2017-04-05
Supplement: Supplemental_Tables.zip [file Supplemental_Table_S15.xlsx]

## Sheet: GO
GOBPID	Pvalue	OddsRatio	ExpCount	Count	Size	Term	FDR	cluster	tissue	genes
GO:0009605	4.15624e-05	8.79939	1.46048	8	956	response to external stimulus	0.00162461	1	Brain	Bka; CG4203; eas; Nxt1; PDCD-5; trn; usp; Vps28
GO:0000902	0.000100097	8.72751	1.19924	7	785	cell morphogenesis	0.00162461	1	Brain	Bka; CG13298; CG31320; CG4203; trn; usp; Vps28
GO:0042594	0.000130044	18.8748	0.270403	4	177	response to starvation	0.00162461	1	Brain	Bka; Nxt1; usp; Vps28
GO:0006950	0.000146278	7.25088	1.74158	8	1140	response to stress	0.00162461	1	Brain	Bka; CG4078; CG6153; eas; Nxt1; PDCD-5; usp; Vps28
GO:0031667	0.000196404	16.8912	0.300957	4	197	response to nutrient levels	0.00162461	1	Brain	Bka; Nxt1; usp; Vps28
GO:0009991	0.000204168	16.7152	0.304012	4	199	response to extracellular stimulus	0.00162461	1	Brain	Bka; Nxt1; usp; Vps28
GO:0032989	0.000252967	7.43863	1.39021	7	910	cellular component morphogenesis	0.00162461	1	Brain	Bka; CG13298; CG31320; CG4203; trn; usp; Vps28
GO:0048858	0.000262665	8.66487	0.968562	6	634	cell projection morphogenesis	0.00162461	1	Brain	Bka; CG13298; CG31320; CG4203; trn; usp
GO:0032990	0.000281182	8.55007	0.980783	6	642	cell part morphogenesis	0.00162461	1	Brain	Bka; CG13298; CG31320; CG4203; trn; usp
GO:0045815	0.000372303	85.8201	0.0290263	2	19	positive regulation of gene expression, epigenetic	0.00193598	1	Brain	Bka; msl-1
GO:0030030	0.000525619	7.55438	1.10147	6	721	cell projection organization	0.00248475	1	Brain	Bka; CG13298; CG31320; CG4203; trn; usp
GO:0009267	0.000776813	19.5445	0.184852	3	121	cellular response to starvation	0.00304045	1	Brain	Bka; Nxt1; Vps28
GO:0031669	0.000795628	19.3787	0.186379	3	122	cellular response to nutrient levels	0.00304045	1	Brain	Bka; Nxt1; Vps28
GO:0031668	0.000834126	19.0553	0.189435	3	124	cellular response to extracellular stimulus	0.00304045	1	Brain	Bka; Nxt1; Vps28
GO:0071496	0.000956693	18.1462	0.198601	3	130	cellular response to external stimulus	0.00304045	1	Brain	Bka; Nxt1; Vps28
GO:0045893	0.00105246	10.6623	0.469004	4	307	positive regulation of transcription, DNA-templated	0.00304045	1	Brain	Bka; CG10555; msl-1; usp
GO:1902680	0.00105246	10.6623	0.469004	4	307	positive regulation of RNA biosynthetic process	0.00304045	1	Brain	Bka; CG10555; msl-1; usp
GO:1903508	0.00105246	10.6623	0.469004	4	307	positive regulation of nucleic acid-templated transcription	0.00304045	1	Brain	Bka; CG10555; msl-1; usp
GO:0051254	0.00117177	10.347	0.482753	4	316	positive regulation of RNA metabolic process	0.00320695	1	Brain	Bka; CG10555; msl-1; usp
GO:0009987	0.00136174	11.1388	11.7465	18	7689	cellular process	0.00323049	1	Brain	Bka; CaMKI; CG10555; CG13298; CG31320; CG4078; CG4203; CG6153; CG6179; CG7945; eas; l(3)02640; msl-1; Nxt1; PDCD-5; trn; usp; Vps28
GO:0048812	0.00136261	7.47855	0.872316	5	571	neuron projection morphogenesis	0.00323049	1	Brain	Bka; CG13298; CG4203; trn; usp
GO:0010557	0.00143853	9.76808	0.510252	4	334	positive regulation of macromolecule biosynthetic process	0.00323049	1	Brain	Bka; CG10555; msl-1; usp
GO:0033554	0.00152973	7.27625	0.895232	5	586	cellular response to stress	0.00323049	1	Brain	Bka; CG4078; CG6153; Nxt1; Vps28
GO:0045935	0.00153621	9.58889	0.519418	4	340	positive regulation of nucleobase-containing compound metabolic process	0.00323049	1	Brain	Bka; CG10555; msl-1; usp
GO:0031175	0.00155312	7.25006	0.898287	5	588	neuron projection development	0.00323049	1	Brain	Bka; CG13298; CG4203; trn; usp
GO:0048699	0.00178867	5.87849	1.39021	6	910	generation of neurons	0.00350393	1	Brain	Bka; CG13298; CG4203; eas; trn; usp
GO:0010628	0.00181935	9.14091	0.543861	4	356	positive regulation of gene expression	0.00350393	1	Brain	Bka; CG10555; msl-1; usp
GO:0009891	0.00226571	8.58752	0.57747	4	378	positive regulation of biosynthetic process	0.00400354	1	Brain	Bka; CG10555; msl-1; usp
GO:0031328	0.00226571	8.58752	0.57747	4	378	positive regulation of cellular biosynthetic process	0.00400354	1	Brain	Bka; CG10555; msl-1; usp
GO:0051173	0.00230974	8.54043	0.580526	4	380	positive regulation of nitrogen compound metabolic process	0.00400354	1	Brain	Bka; CG10555; msl-1; usp
GO:0048666	0.00368694	5.88055	1.09383	5	716	neuron development	0.00618455	1	Brain	Bka; CG13298; CG4203; trn; usp
GO:0050896	0.00402632	3.82902	4.28214	10	2803	response to stimulus	0.00654277	1	Brain	Bka; CG4078; CG4203; CG6153; eas; Nxt1; PDCD-5; trn; usp; Vps28
GO:0080134	0.00540837	9.6785	0.36512	3	239	regulation of response to stress	0.00852228	1	Brain	CG4078; Nxt1; PDCD-5
GO:0016319	0.00635175	18.8556	0.120688	2	79	mushroom body development	0.00914157	1	Brain	eas; usp
GO:0045088	0.0065087	18.6124	0.122216	2	80	regulation of innate immune response	0.00914157	1	Brain	Nxt1; PDCD-5
GO:0030182	0.00689016	5.02514	1.26646	5	829	neuron differentiation	0.00914157	1	Brain	Bka; CG13298; CG4203; trn; usp
GO:0000904	0.00748467	6.05293	0.806625	4	528	cell morphogenesis involved in differentiation	0.00914157	1	Brain	CG4203; trn; usp; Vps28
GO:0016457	0.00761642	172.417	0.0076385	1	5	dosage compensation complex assembly involved in dosage compensation by hyperactivation of X chromosome	0.00914157	1	Brain	msl-1
GO:0018065	0.00761642	172.417	0.0076385	1	5	protein-cofactor linkage	0.00914157	1	Brain	l(3)02640
GO:0043984	0.00761642	172.417	0.0076385	1	5	histone H4-K16 acetylation	0.00914157	1	Brain	msl-1
GO:0051341	0.00761642	172.417	0.0076385	1	5	regulation of oxidoreductase activity	0.00914157	1	Brain	CG6179
GO:0070286	0.00761642	172.417	0.0076385	1	5	axonemal dynein complex assembly	0.00914157	1	Brain	CG31320
GO:2000779	0.00761642	172.417	0.0076385	1	5	regulation of double-strand break repair	0.00914157	1	Brain	CG4078
GO:0010604	0.00773518	5.99319	0.814264	4	533	positive regulation of macromolecule metabolic process	0.00914157	1	Brain	Bka; CG10555; msl-1; usp
GO:0044260	0.0085631	3.33138	5.5593	11	3639	cellular macromolecule metabolic process	0.00949841	1	Brain	Bka; CaMKI; CG10555; CG13298; CG4078; CG6179; CG7945; l(3)02640; msl-1; usp; Vps28
GO:0031325	0.00907203	5.71071	0.852456	4	558	positive regulation of cellular metabolic process	0.00949841	1	Brain	Bka; CG10555; msl-1; usp
GO:0050829	0.00907229	15.5914	0.145131	2	95	defense response to Gram-negative bacterium	0.00949841	1	Brain	Nxt1; PDCD-5
GO:0016973	0.00913309	137.922	0.0091662	1	6	poly(A)+ mRNA export from nucleus	0.00949841	1	Brain	Nxt1
GO:0042714	0.00913309	137.922	0.0091662	1	6	dosage compensation complex assembly	0.00949841	1	Brain	msl-1
GO:0051036	0.00913309	137.922	0.0091662	1	6	regulation of endosome size	0.00949841	1	Brain	Vps28
GO:0046483	0.00937041	3.52074	3.26011	8	2134	heterocycle metabolic process	0.00955414	1	Brain	Bka; CG10555; CG13298; CG4078; CG6179; l(3)02640; msl-1; usp
GO:0043170	0.00989346	3.26886	6.54467	12	4284	macromolecule metabolic process	0.00989346	1	Brain	Bka; CaMKI; CG10555; CG13298; CG4078; CG6179; CG7945; l(3)02640; msl-1; Nxt1; usp; Vps28
GO:0043401	0.000290871	98.4365	0.0257297	2	20	steroid hormone mediated signaling pathway	0.0020361	2	Brain	Eip75B; Hr78
GO:0048545	0.000290871	98.4365	0.0257297	2	20	response to steroid hormone	0.0020361	2	Brain	Eip75B; Hr78
GO:0071383	0.000290871	98.4365	0.0257297	2	20	cellular response to steroid hormone stimulus	0.0020361	2	Brain	Eip75B; Hr78
GO:0009755	0.000706018	61.0443	0.039881	2	31	hormone-mediated signaling pathway	0.00370659	2	Brain	Eip75B; Hr78
GO:0071396	0.00100666	50.5551	0.0475999	2	37	cellular response to lipid	0.0039142	2	Brain	Eip75B; Hr78
GO:0010001	0.00111834	47.8147	0.0501729	2	39	glial cell differentiation	0.0039142	2	Brain	pros; rap
GO:0033993	0.00221449	33.3369	0.0707566	2	55	response to lipid	0.00664347	2	Brain	Eip75B; Hr78
GO:0006909	0.00271439	12.7393	0.288172	3	224	phagocytosis	0.00679845	2	Brain	CG9449; CG9527; pros
GO:0071407	0.00298613	28.477	0.082335	2	64	cellular response to organic cyclic compound	0.00679845	2	Brain	Eip75B; Hr78
GO:0032870	0.00336411	26.7424	0.0874809	2	68	cellular response to hormone stimulus	0.00679845	2	Brain	Eip75B; Hr78
GO:0009725	0.00356109	25.9517	0.0900539	2	70	response to hormone	0.00679845	2	Brain	Eip75B; Hr78
GO:0042063	0.00485324	22.0375	0.105492	2	82	gliogenesis	0.00849318	2	Brain	pros; rap
GO:0042221	0.00629828	5.33613	1.26075	5	980	response to chemical	0.00898369	2	Brain	cpo; Eip75B; Hr78; pros; sm
GO:0007553	0.00641692	206.95	0.00643242	1	5	regulation of ecdysteroid metabolic process	0.00898369	2	Brain	Eip75B
GO:0019218	0.00641692	206.95	0.00643242	1	5	regulation of steroid metabolic process	0.00898369	2	Brain	Eip75B
GO:0007422	0.00727576	17.7807	0.129935	2	101	peripheral nervous system development	0.00927672	2	Brain	cpo; pros
GO:0010771	0.00769566	165.547	0.0077189	1	6	negative regulation of cell morphogenesis involved in differentiation	0.00927672	2	Brain	pros
GO:0010565	0.00897286	137.944	0.00900539	1	7	regulation of cellular ketone metabolic process	0.00927672	2	Brain	Eip75B
GO:0021675	0.00897286	137.944	0.00900539	1	7	nerve development	0.00927672	2	Brain	pros
GO:0001745	0.00920399	8.10174	0.44641	3	347	compound eye morphogenesis	0.00927672	2	Brain	Nhe2; pros; rap
GO:0006897	0.00927672	8.07759	0.447696	3	348	endocytosis	0.00927672	2	Brain	CG9449; CG9527; pros
GO:0043401	4.6435e-06	121.559	0.0337702	3	20	steroid hormone mediated signaling pathway	0.000102157	3	Brain	EcR; ftz-f1; svp
GO:0048545	4.6435e-06	121.559	0.0337702	3	20	response to steroid hormone	0.000102157	3	Brain	EcR; ftz-f1; svp
GO:0071383	4.6435e-06	121.559	0.0337702	3	20	cellular response to steroid hormone stimulus	0.000102157	3	Brain	EcR; ftz-f1; svp
GO:0009755	1.80918e-05	73.7381	0.0523438	3	31	hormone-mediated signaling pathway	0.000298515	3	Brain	EcR; ftz-f1; svp
GO:0071396	3.10702e-05	60.6961	0.0624749	3	37	cellular response to lipid	0.000410126	3	Brain	EcR; ftz-f1; svp
GO:0015800	5.67361e-05	261.284	0.0118196	2	7	acidic amino acid transport	0.000624097	3	Brain	CG1732; Eaat1
GO:0033993	0.000102876	39.6282	0.0928681	3	55	response to lipid	0.000969975	3	Brain	EcR; ftz-f1; svp
GO:0040034	0.00014799	145.111	0.0185736	2	11	regulation of development, heterochronic	0.00118646	3	Brain	EcR; ftz-f1
GO:0071407	0.00016179	33.7568	0.108065	3	64	cellular response to organic cyclic compound	0.00118646	3	Brain	EcR; ftz-f1; svp
GO:0032870	0.000193767	31.6692	0.114819	3	68	cellular response to hormone stimulus	0.00126712	3	Brain	EcR; ftz-f1; svp
GO:0009725	0.000211186	30.7189	0.118196	3	70	response to hormone	0.00126712	3	Brain	EcR; ftz-f1; svp
GO:0030522	0.000321248	93.2481	0.0270162	2	16	intracellular receptor signaling pathway	0.00176686	3	Brain	EcR; ftz-f1
GO:0035073	0.00036371	87.0246	0.0287047	2	17	pupariation	0.00184653	3	Brain	EcR; ftz-f1
GO:0035210	0.000456382	76.774	0.0320817	2	19	prepupal development	0.00200808	3	Brain	EcR; ftz-f1
GO:0060911	0.000456382	76.774	0.0320817	2	19	cardiac cell fate commitment	0.00200808	3	Brain	EcR; svp
GO:0010002	0.000506575	72.5029	0.0337702	2	20	cardioblast differentiation	0.00208962	3	Brain	EcR; svp
GO:0008345	0.000999647	50.1619	0.0472783	2	28	larval locomotory behavior	0.00388098	3	Brain	Eaat1; EcR
GO:0035051	0.00114805	46.5714	0.0506553	2	30	cardiocyte differentiation	0.00420951	3	Brain	EcR; svp
GO:0014070	0.00129322	16.1273	0.219506	3	130	response to organic cyclic compound	0.00449223	3	Brain	EcR; ftz-f1; svp
GO:0016322	0.00174523	37.2361	0.0624749	2	37	neuron remodeling	0.00500806	3	Brain	EcR; ftz-f1
GO:0035075	0.00174523	37.2361	0.0624749	2	37	response to ecdysone	0.00500806	3	Brain	EcR; ftz-f1
GO:0036314	0.00174523	37.2361	0.0624749	2	37	response to sterol	0.00500806	3	Brain	EcR; ftz-f1
GO:1901654	0.00174523	37.2361	0.0624749	2	37	response to ketone	0.00500806	3	Brain	EcR; ftz-f1
GO:0042551	0.00193782	35.2176	0.0658519	2	39	neuron maturation	0.00518367	3	Brain	EcR; ftz-f1
GO:0030182	0.00196351	5.63451	1.39977	6	829	neuron differentiation	0.00518367	3	Brain	CG10249; EcR; ftz-f1; Sirt2; svp; tinc
GO:0008340	0.00234407	13.0138	0.270162	3	160	determination of adult lifespan	0.0058079	3	Brain	Eaat1; EcR; Sirt2
GO:0010259	0.00247122	12.7667	0.275227	3	163	multicellular organismal aging	0.0058079	3	Brain	Eaat1; EcR; Sirt2
GO:0071495	0.00247122	12.7667	0.275227	3	163	cellular response to endogenous stimulus	0.0058079	3	Brain	EcR; ftz-f1; svp
GO:0007568	0.00264733	12.4512	0.281981	3	167	aging	0.0058079	3	Brain	Eaat1; EcR; Sirt2
GO:0009612	0.00292303	28.3066	0.0810485	2	48	response to mechanical stimulus	0.0058079	3	Brain	CG1732; pain
GO:0007443	0.00304432	27.7021	0.082737	2	49	Malpighian tubule morphogenesis	0.0058079	3	Brain	EcR; svp
GO:0044057	0.00304432	27.7021	0.082737	2	49	regulation of system process	0.0058079	3	Brain	Eaat1; pain
GO:0061333	0.00304432	27.7021	0.082737	2	49	renal tubule morphogenesis	0.0058079	3	Brain	EcR; svp
GO:0032989	0.00315333	5.09381	1.53654	6	910	cellular component morphogenesis	0.0058079	3	Brain	C3G; CG10249; dy; EcR; ftz-f1; Sirt2
GO:0048699	0.00315333	5.09381	1.53654	6	910	generation of neurons	0.0058079	3	Brain	CG10249; EcR; ftz-f1; Sirt2; svp; tinc
GO:0006865	0.00316795	27.1228	0.0844255	2	50	amino acid transport	0.0058079	3	Brain	CG1732; Eaat1
GO:0048619	0.00368567	25.0283	0.0911795	2	54	embryonic hindgut morphogenesis	0.00657444	3	Brain	EcR; svp
GO:0030537	0.00395837	24.0975	0.0945566	2	56	larval behavior	0.00687506	3	Brain	Eaat1; EcR
GO:0046530	0.00440058	10.3376	0.337702	3	200	photoreceptor cell differentiation	0.00744714	3	Brain	EcR; svp; tinc
GO:0007442	0.00498438	21.3201	0.106376	2	63	hindgut morphogenesis	0.00792462	3	Brain	EcR; svp
GO:0061525	0.00498438	21.3201	0.106376	2	63	hindgut development	0.00792462	3	Brain	EcR; svp
GO:0009719	0.00504294	9.83011	0.354587	3	210	response to endogenous stimulus	0.00792462	3	Brain	EcR; ftz-f1; svp
GO:0048813	0.00559577	9.45814	0.368095	3	218	dendrite morphogenesis	0.00802666	3	Brain	EcR; ftz-f1; Sirt2
GO:0015849	0.00561998	20.0016	0.11313	2	67	organic acid transport	0.00802666	3	Brain	CG1732; Eaat1
GO:0046942	0.00561998	20.0016	0.11313	2	67	carboxylic acid transport	0.00802666	3	Brain	CG1732; Eaat1
GO:0061326	0.00578441	19.697	0.114819	2	68	renal tubule development	0.00802666	3	Brain	EcR; svp
GO:0072002	0.00578441	19.697	0.114819	2	68	Malpighian tubule development	0.00802666	3	Brain	EcR; svp
GO:0048666	0.00586423	5.1446	1.20897	5	716	neuron development	0.00802666	3	Brain	CG10249; EcR; ftz-f1; Sirt2; tinc
GO:0071310	0.00595919	9.23939	0.376538	3	223	cellular response to organic substance	0.00802666	3	Brain	EcR; ftz-f1; svp
GO:0016358	0.00610845	9.15465	0.379915	3	225	dendrite development	0.00806316	3	Brain	EcR; ftz-f1; Sirt2
GO:0048546	0.0068169	18.0468	0.12495	2	74	digestive tract morphogenesis	0.00882187	3	Brain	EcR; svp
GO:0001655	0.00717838	17.5562	0.128327	2	76	urogenital system development	0.00893912	3	Brain	EcR; svp
GO:0072001	0.00717838	17.5562	0.128327	2	76	renal system development	0.00893912	3	Brain	EcR; svp
GO:0016319	0.00773664	16.8681	0.133392	2	79	mushroom body development	0.00895837	3	Brain	EcR; ftz-f1
GO:0007417	0.00807705	8.24526	0.420439	3	249	central nervous system development	0.00895837	3	Brain	EcR; ftz-f1; svp
GO:0048863	0.00811942	16.4384	0.136769	2	81	stem cell differentiation	0.00895837	3	Brain	EcR; svp
GO:0007468	0.00841544	155.15	0.00844255	1	5	regulation of rhodopsin gene expression	0.00895837	3	Brain	EcR
GO:0016048	0.00841544	155.15	0.00844255	1	5	detection of temperature stimulus	0.00895837	3	Brain	pain
GO:0033555	0.00841544	155.15	0.00844255	1	5	multicellular organismal response to stress	0.00895837	3	Brain	pain
GO:0035074	0.00841544	155.15	0.00844255	1	5	pupation	0.00895837	3	Brain	ftz-f1
GO:0050951	0.00841544	155.15	0.00844255	1	5	sensory perception of temperature stimulus	0.00895837	3	Brain	pain
GO:0050961	0.00841544	155.15	0.00844255	1	5	detection of temperature stimulus involved in sensory perception	0.00895837	3	Brain	pain
GO:0000902	0.00862077	4.66186	1.32548	5	785	cell morphogenesis	0.00903128	3	Brain	CG10249; dy; EcR; ftz-f1; Sirt2
GO:0035071	0.0093181	15.2706	0.1469	2	87	salivary gland cell autophagic cell death	0.00946145	3	Brain	EcR; ftz-f1
GO:0048102	0.0093181	15.2706	0.1469	2	87	autophagic cell death	0.00946145	3	Brain	EcR; ftz-f1
GO:0044708	0.00972325	5.51552	0.864517	4	512	single-organism behavior	0.00972325	3	Brain	Eaat1; EcR; ftz-f1; pain
GO:0007317	0.000145728	153.111	0.018654	2	29	regulation of pole plasm oskar mRNA localization	0.00287201	4	Brain	didum; mira
GO:0060281	0.000156087	147.631	0.0192973	2	30	regulation of oocyte development	0.00287201	4	Brain	didum; mira
GO:1902875	0.000156087	147.631	0.0192973	2	30	regulation of embryonic pattern specification	0.00287201	4	Brain	didum; mira
GO:1903429	0.000156087	147.631	0.0192973	2	30	regulation of cell maturation	0.00287201	4	Brain	didum; mira
GO:1904580	0.000156087	147.631	0.0192973	2	30	regulation of intracellular mRNA localization	0.00287201	4	Brain	didum; mira
GO:0009952	0.000256731	35.0813	0.136367	3	212	anterior/posterior pattern specification	0.00393654	4	Brain	didum; mira; shn
GO:0007389	0.000305128	20.1378	0.380799	4	592	pattern specification process	0.00401025	4	Brain	didum; mira; sca; shn
GO:0009790	0.000434473	18.2698	0.417464	4	649	embryo development	0.00473692	4	Brain	Bsg25A; didum; mira; shn
GO:0051128	0.000463395	17.9466	0.42454	4	660	regulation of cellular component organization	0.00473692	4	Brain	Bsg25A; Bub1; didum; mira
GO:2000241	0.000671576	68.7167	0.039881	2	62	regulation of reproductive process	0.00590617	4	Brain	didum; mira
GO:0045451	0.000807454	62.4394	0.0437405	2	68	pole plasm oskar mRNA localization	0.00590617	4	Brain	didum; mira
GO:0007316	0.000904826	58.8524	0.0463134	2	72	pole plasm RNA localization	0.00590617	4	Brain	didum; mira
GO:0019094	0.000904826	58.8524	0.0463134	2	72	pole plasm mRNA localization	0.00590617	4	Brain	didum; mira
GO:0060811	0.00106101	54.1798	0.0501729	2	78	intracellular mRNA localization involved in anterior/posterior axis specification	0.00590617	4	Brain	didum; mira
GO:0001745	0.00108634	21.0785	0.223205	3	347	compound eye morphogenesis	0.00590617	4	Brain	didum; sca; shn
GO:0007315	0.00111576	52.7821	0.0514594	2	80	pole plasm assembly	0.00590617	4	Brain	didum; mira
GO:0060810	0.00114364	52.1097	0.0521026	2	81	intracellular mRNA localization involved in pattern specification process	0.00590617	4	Brain	didum; mira
GO:0048592	0.00128807	19.8312	0.236713	3	368	eye morphogenesis	0.00590617	4	Brain	didum; sca; shn
GO:0090596	0.00128807	19.8312	0.236713	3	368	sensory organ morphogenesis	0.00590617	4	Brain	didum; sca; shn
GO:0045995	0.00131793	48.4078	0.055962	2	87	regulation of embryonic development	0.00590617	4	Brain	didum; mira
GO:0007028	0.00134815	47.8411	0.0566053	2	88	cytoplasm organization	0.00590617	4	Brain	didum; mira
GO:0008298	0.00153641	44.6993	0.0604647	2	94	intracellular mRNA localization	0.00627869	4	Brain	didum; mira
GO:0048699	0.00156967	12.7185	0.58535	4	910	generation of neurons	0.00627869	4	Brain	didum; mira; sca; shn
GO:0007314	0.00187658	40.2843	0.0668972	2	104	oocyte anterior/posterior axis specification	0.00688917	4	Brain	didum; mira
GO:0033044	0.00198502	39.1238	0.0688269	2	107	regulation of chromosome organization	0.00688917	4	Brain	Bsg25A; Bub1
GO:0048749	0.00199172	16.9468	0.275308	3	428	compound eye development	0.00688917	4	Brain	didum; sca; shn
GO:0008358	0.00202182	38.7516	0.0694701	2	108	maternal determination of anterior/posterior axis, embryo	0.00688917	4	Brain	didum; mira
GO:0016043	0.00221894	10.5049	1.77985	6	2767	cellular component organization	0.00729082	4	Brain	Bsg25A; Bub1; didum; mira; sca; shn
GO:0001654	0.00235922	15.9353	0.292032	3	454	eye development	0.00739194	4	Brain	didum; sca; shn
GO:0071840	0.0025279	10.1896	1.8223	6	2833	cellular component organization or biogenesis	0.00739194	4	Brain	Bsg25A; Bub1; didum; mira; sca; shn
GO:2000026	0.00254231	15.5067	0.299751	3	466	regulation of multicellular organismal development	0.00739194	4	Brain	didum; mira; shn
GO:0030162	0.00257111	34.1917	0.0784755	2	122	regulation of proteolysis	0.00739194	4	Brain	Bub1; mira
GO:0040019	0.00321259	443.75	0.00321621	1	5	positive regulation of embryonic development	0.00832141	4	Brain	didum
GO:0045468	0.00321259	443.75	0.00321621	1	5	regulation of R8 cell spacing in compound eye	0.00832141	4	Brain	sca
GO:0043900	0.00356116	28.8427	0.0926268	2	144	regulation of multi-organism process	0.00832141	4	Brain	didum; mira
GO:0007309	0.00375761	28.0434	0.0951998	2	148	oocyte axis specification	0.00832141	4	Brain	didum; mira
GO:0034643	0.00385402	354.971	0.00385945	1	6	establishment of mitochondrion localization, microtubule-mediated	0.00832141	4	Brain	didum
GO:0047497	0.00385402	354.971	0.00385945	1	6	mitochondrion transport along microtubule	0.00832141	4	Brain	didum
GO:0051654	0.00385402	354.971	0.00385945	1	6	establishment of mitochondrion localization	0.00832141	4	Brain	didum
GO:0007308	0.00395907	27.2867	0.0977728	2	152	oocyte construction	0.00832141	4	Brain	didum; mira
GO:0003002	0.00397272	13.159	0.350567	3	545	regionalization	0.00832141	4	Brain	didum; mira; shn
GO:0098813	0.0042179	26.3957	0.100989	2	157	nuclear chromosome segregation	0.00832141	4	Brain	Bub1; sca
GO:0006403	0.0043236	26.0552	0.102275	2	159	RNA localization	0.00832141	4	Brain	didum; mira
GO:0072697	0.0044951	295.786	0.00450269	1	7	protein localization to cell cortex	0.00832141	4	Brain	mira
GO:2000243	0.0044951	295.786	0.00450269	1	7	positive regulation of reproductive process	0.00832141	4	Brain	didum
GO:0007423	0.00451099	12.5524	0.366648	3	570	sensory organ development	0.00832141	4	Brain	didum; sca; shn
GO:0031324	0.00480793	12.2576	0.37501	3	583	negative regulation of cellular metabolic process	0.00832141	4	Brain	Bsg25A; Bub1; shn
GO:0007351	0.00481455	24.6245	0.108065	2	168	tripartite regional subdivision	0.00832141	4	Brain	didum; mira
GO:0008595	0.00481455	24.6245	0.108065	2	168	anterior/posterior axis specification, embryo	0.00832141	4	Brain	didum; mira
GO:0048599	0.00487064	24.475	0.108708	2	169	oocyte development	0.00832141	4	Brain	didum; mira
GO:0060341	0.00487064	24.475	0.108708	2	169	regulation of cellular localization	0.00832141	4	Brain	didum; mira
GO:0001751	0.00492703	24.3274	0.109351	2	170	compound eye photoreceptor cell differentiation	0.00832141	4	Brain	didum; sca
GO:0000578	0.00509804	23.8947	0.111281	2	173	embryonic axis specification	0.00832141	4	Brain	didum; mira
GO:0045704	0.00513581	253.51	0.00514594	1	8	regulation of salivary gland boundary specification	0.00832141	4	Brain	shn
GO:0045705	0.00513581	253.51	0.00514594	1	8	negative regulation of salivary gland boundary specification	0.00832141	4	Brain	shn
GO:0072384	0.00513581	253.51	0.00514594	1	8	organelle transport along microtubule	0.00832141	4	Brain	didum
GO:0009948	0.00515566	23.7539	0.111924	2	174	anterior/posterior axis specification	0.00832141	4	Brain	didum; mira
GO:0001754	0.0052718	23.477	0.113211	2	176	eye photoreceptor cell differentiation	0.00836217	4	Brain	didum; sca
GO:0007059	0.00538916	23.2064	0.114497	2	178	chromosome segregation	0.00840344	4	Brain	Bub1; sca
GO:0007402	0.00577616	221.804	0.00578918	1	9	ganglion mother cell fate determination	0.00885678	4	Brain	mira
GO:0009994	0.00605627	21.8217	0.121573	2	189	oocyte differentiation	0.00898672	4	Brain	didum; mira
GO:0051130	0.00605627	21.8217	0.121573	2	189	positive regulation of cellular component organization	0.00898672	4	Brain	Bsg25A; didum
GO:0048469	0.00624453	21.4719	0.123502	2	192	cell maturation	0.00911899	4	Brain	didum; mira
GO:0010605	0.00647375	10.9619	0.416821	3	648	negative regulation of macromolecule metabolic process	0.00930601	4	Brain	Bsg25A; Bub1; shn
GO:0051239	0.00661473	10.8729	0.420037	3	653	regulation of multicellular organismal process	0.00936238	4	Brain	didum; mira; shn
GO:0046530	0.00675968	20.5909	0.128648	2	200	photoreceptor cell differentiation	0.0094077	4	Brain	didum; sca
GO:0050793	0.00696075	10.665	0.427756	3	665	regulation of developmental process	0.0094077	4	Brain	didum; mira; shn
GO:0003156	0.00705578	177.414	0.00707566	1	11	regulation of organ formation	0.0094077	4	Brain	shn
GO:0048100	0.00705578	177.414	0.00707566	1	11	wing disc anterior/posterior pattern formation	0.0094077	4	Brain	shn
GO:0009892	0.00756174	10.3346	0.440621	3	685	negative regulation of metabolic process	0.00982426	4	Brain	Bsg25A; Bub1; shn
GO:0021700	0.00805894	18.7588	0.14087	2	219	developmental maturation	0.00982426	4	Brain	didum; mira
GO:0022008	0.00823183	7.74051	0.917263	4	1426	neurogenesis	0.00982426	4	Brain	didum; mira; sca; shn
GO:0007460	0.00833395	147.821	0.00836215	1	13	R8 cell fate commitment	0.00982426	4	Brain	sca
GO:0001700	0.00871115	17.9985	0.146659	2	228	embryonic development via the syncytial blastoderm	0.00982426	4	Brain	Bsg25A; shn
GO:0007094	0.0089725	136.44	0.00900539	1	14	mitotic spindle assembly checkpoint	0.00982426	4	Brain	Bub1
GO:0045167	0.0089725	136.44	0.00900539	1	14	asymmetric protein localization involved in cell fate determination	0.00982426	4	Brain	mira
GO:0071173	0.0089725	136.44	0.00900539	1	14	spindle assembly checkpoint	0.00982426	4	Brain	Bub1
GO:0071174	0.0089725	136.44	0.00900539	1	14	mitotic spindle checkpoint	0.00982426	4	Brain	Bub1
GO:1904666	0.0089725	136.44	0.00900539	1	14	regulation of ubiquitin protein ligase activity	0.00982426	4	Brain	Bub1
GO:1904667	0.0089725	136.44	0.00900539	1	14	negative regulation of ubiquitin protein ligase activity	0.00982426	4	Brain	Bub1
GO:0044087	0.00900852	17.6797	0.149232	2	232	regulation of cellular component biogenesis	0.00982426	4	Brain	didum; mira
GO:0060284	0.00915892	17.5244	0.150519	2	234	regulation of cell development	0.00982426	4	Brain	didum; mira
GO:0065007	0.00916015	7.40664	2.3086	6	3589	biological regulation	0.00982426	4	Brain	Bsg25A; Bub1; didum; mira; sca; shn
GO:0080090	0.00938679	7.42644	0.951355	4	1479	regulation of primary metabolic process	0.00982426	4	Brain	Bsg25A; Bub1; mira; shn
GO:0031577	0.00961069	126.684	0.00964863	1	15	spindle checkpoint	0.00982426	4	Brain	Bub1
GO:0033046	0.00961069	126.684	0.00964863	1	15	negative regulation of sister chromatid segregation	0.00982426	4	Brain	Bub1
GO:0033048	0.00961069	126.684	0.00964863	1	15	negative regulation of mitotic sister chromatid segregation	0.00982426	4	Brain	Bub1
GO:0045841	0.00961069	126.684	0.00964863	1	15	negative regulation of mitotic metaphase/anaphase transition	0.00982426	4	Brain	Bub1
GO:1902100	0.00961069	126.684	0.00964863	1	15	negative regulation of metaphase/anaphase transition of cell cycle	0.00982426	4	Brain	Bub1
GO:2000816	0.00961069	126.684	0.00964863	1	15	negative regulation of mitotic sister chromatid separation	0.00982426	4	Brain	Bub1
GO:0009792	0.00977197	16.9292	0.155665	2	242	embryo development ending in birth or egg hatching	0.00987935	4	Brain	Bsg25A; shn
GO:0007350	0.00992808	16.7865	0.156951	2	244	blastoderm segmentation	0.00992808	4	Brain	didum; mira
GO:0048738	3.28213e-05	344.917	0.00900539	2	8	cardiac muscle tissue development	0.00105028	5	Brain	Cg25C; sd
GO:1901565	0.000109979	40.5476	0.0968079	3	86	organonitrogen compound catabolic process	0.00175967	5	Brain	CG10361; CG9380; Cht3
GO:0006026	0.00040644	82.6533	0.0303932	2	27	aminoglycan catabolic process	0.00344902	5	Brain	CG9380; Cht3
GO:0035051	0.000502737	73.7798	0.0337702	2	30	cardiocyte differentiation	0.00344902	5	Brain	Cg25C; sd
GO:0014706	0.000609042	66.6237	0.0371472	2	33	striated muscle tissue development	0.00344902	5	Brain	Cg25C; sd
GO:0060537	0.000646691	64.5365	0.0382729	2	34	muscle tissue development	0.00344902	5	Brain	Cg25C; sd
GO:1901136	0.00139766	42.9688	0.0562837	2	50	carbohydrate derivative catabolic process	0.00470978	5	Brain	CG9380; Cht3
GO:2000026	0.00144343	10.3558	0.524564	4	466	regulation of multicellular organismal development	0.00470978	5	Brain	Ank2; blue; ewg; sd
GO:0055001	0.0015692	40.4314	0.0596607	2	53	muscle cell development	0.00470978	5	Brain	Cg25C; sd
GO:0055002	0.0015692	40.4314	0.0596607	2	53	striated muscle cell development	0.00470978	5	Brain	Cg25C; sd
GO:0035295	0.00161899	7.75971	0.939937	5	835	tube development	0.00470978	5	Brain	Cg25C; ect; ewg; ImpE2; sd
GO:0044087	0.00200324	14.5224	0.261156	3	232	regulation of cellular component biogenesis	0.00534198	5	Brain	Ank2; blue; ewg
GO:0009887	0.00241126	7.0454	1.02774	5	913	organ morphogenesis	0.00593541	5	Brain	Ccm3; Cg25C; ewg; ImpE2; sd
GO:0061061	0.00271126	13.0139	0.290424	3	258	muscle structure development	0.00619716	5	Brain	Cg25C; ewg; sd
GO:0035239	0.00373171	7.882	0.679907	4	604	tube morphogenesis	0.00726465	5	Brain	Cg25C; ewg; ImpE2; sd
GO:0008582	0.00474795	22.5861	0.104688	2	93	regulation of synaptic growth at neuromuscular junction	0.00726465	5	Brain	Ank2; ewg
GO:1904396	0.00474795	22.5861	0.104688	2	93	regulation of neuromuscular junction development	0.00726465	5	Brain	Ank2; ewg
GO:0051239	0.0049398	7.2567	0.735065	4	653	regulation of multicellular organismal process	0.00726465	5	Brain	Ank2; blue; ewg; sd
GO:0051146	0.00515421	21.6281	0.10919	2	97	striated muscle cell differentiation	0.00726465	5	Brain	Cg25C; sd
GO:0051963	0.00525822	21.401	0.110316	2	98	regulation of synapse assembly	0.00726465	5	Brain	Ank2; ewg
GO:0050793	0.00527201	7.1177	0.748573	4	665	regulation of developmental process	0.00726465	5	Brain	Ank2; blue; ewg; sd
GO:0035331	0.00561661	238.827	0.00562837	1	5	negative regulation of hippo signaling	0.00726465	5	Brain	sd
GO:2000826	0.00561661	238.827	0.00562837	1	5	regulation of heart morphogenesis	0.00726465	5	Brain	sd
GO:0007507	0.00590252	20.1324	0.11707	2	104	heart development	0.00726465	5	Brain	Cg25C; sd
GO:0072358	0.00590252	20.1324	0.11707	2	104	cardiovascular system development	0.00726465	5	Brain	Cg25C; sd
GO:0072359	0.00590252	20.1324	0.11707	2	104	circulatory system development	0.00726465	5	Brain	Cg25C; sd
GO:0002009	0.0068209	6.58903	0.804856	4	715	morphogenesis of an epithelium	0.00792403	5	Brain	Cg25C; ewg; ImpE2; sd
GO:0042692	0.00693352	18.4865	0.127201	2	113	muscle cell differentiation	0.00792403	5	Brain	Cg25C; sd
GO:0048729	0.00737515	6.43521	0.822867	4	731	tissue morphogenesis	0.00813809	5	Brain	Cg25C; ewg; ImpE2; sd
GO:0050807	0.00816835	16.9449	0.138458	2	123	regulation of synapse organization	0.00843185	5	Brain	Ank2; ewg
GO:0051124	0.00816835	16.9449	0.138458	2	123	synaptic growth at neuromuscular junction	0.00843185	5	Brain	Ank2; ewg
GO:0007561	0.0089725	136.44	0.00900539	1	8	imaginal disc eversion	0.0089725	5	Brain	ImpE2
GO:0006900	0.000323194	93.9394	0.027177	2	26	membrane budding	0.00662565	6	Brain	AP-1sigma; WASp
GO:0006281	0.000323202	28.1519	0.140066	3	134	DNA repair	0.00662565	6	Brain	CG6812; mu2; Rad17
GO:0016203	0.000808264	57.7389	0.042856	2	41	muscle attachment	0.00934765	6	Brain	rt; WASp
GO:0060538	0.00145171	42.4391	0.0574897	2	55	skeletal muscle organ development	0.00934765	6	Brain	rt; WASp
GO:0006886	0.00223578	14.1465	0.272815	3	261	intracellular protein transport	0.00934765	6	Brain	AP-1sigma; cos; WASp
GO:0033554	0.00248067	9.04315	0.612527	4	586	cellular response to stress	0.00934765	6	Brain	CG6812; mu2; Rad17; Su(Tpl)
GO:0006259	0.00278672	13.0591	0.294766	3	282	DNA metabolic process	0.00934765	6	Brain	CG6812; mu2; Rad17
GO:0016050	0.00282357	29.937	0.0804856	2	77	vesicle organization	0.00934765	6	Brain	AP-1sigma; WASp
GO:0006974	0.00313626	12.5082	0.307309	3	294	cellular response to DNA damage stimulus	0.00934765	6	Brain	CG6812; mu2; Rad17
GO:0010638	0.00417594	24.3715	0.0982552	2	94	positive regulation of organelle organization	0.00934765	6	Brain	cid; WASp
GO:0051146	0.00444037	23.5962	0.101391	2	97	striated muscle cell differentiation	0.00934765	6	Brain	rt; WASp
GO:0034613	0.00480184	10.6947	0.357482	3	342	cellular protein localization	0.00934765	6	Brain	AP-1sigma; cos; WASp
GO:0006897	0.00504137	10.5035	0.363753	3	348	endocytosis	0.00934765	6	Brain	AP-1sigma; CG18659; WASp
GO:0090304	0.00514415	5.31627	1.80936	6	1731	nucleic acid metabolic process	0.00934765	6	Brain	CG6812; cid; cos; mu2; Rad17; Su(Tpl)
GO:0007227	0.00521626	258.75	0.00522634	1	5	signal transduction downstream of smoothened	0.00934765	6	Brain	cos
GO:0007228	0.00521626	258.75	0.00522634	1	5	positive regulation of hh target transcription factor activity	0.00934765	6	Brain	cos
GO:0042795	0.00521626	258.75	0.00522634	1	5	snRNA transcription from RNA polymerase II promoter	0.00934765	6	Brain	Su(Tpl)
GO:0051382	0.00521626	258.75	0.00522634	1	5	kinetochore assembly	0.00934765	6	Brain	cid
GO:0015031	0.00524648	10.3491	0.36898	3	353	protein transport	0.00934765	6	Brain	AP-1sigma; cos; WASp
GO:0051234	0.00528138	5.28423	1.81877	6	1740	establishment of localization	0.00934765	6	Brain	AP-1sigma; CG18659; CG6812; cid; cos; WASp
GO:0045184	0.00584771	9.93956	0.383613	3	367	establishment of protein localization	0.00934765	6	Brain	AP-1sigma; cos; WASp
GO:0042692	0.00597833	20.1687	0.118115	2	113	muscle cell differentiation	0.00934765	6	Brain	rt; WASp
GO:0009301	0.0062565	206.983	0.00627161	1	6	snRNA transcription	0.00934765	6	Brain	Su(Tpl)
GO:0061077	0.0062565	206.983	0.00627161	1	6	chaperone-mediated protein folding	0.00934765	6	Brain	Ero1L
GO:0051716	0.00630404	5.07222	1.88357	6	1802	cellular response to stimulus	0.00934765	6	Brain	CG18659; CG6812; cos; mu2; Rad17; Su(Tpl)
GO:0051649	0.00631277	6.86917	0.793359	4	759	establishment of localization in cell	0.00934765	6	Brain	AP-1sigma; cid; cos; WASp
GO:0048731	0.00645081	4.75678	2.56509	7	2454	system development	0.00934765	6	Brain	AP-1sigma; CG31223; cid; cos; rt; Su(Tpl); WASp
GO:0007385	0.00729573	172.472	0.00731688	1	7	specification of segmental identity, abdomen	0.00934765	6	Brain	rt
GO:0034508	0.00729573	172.472	0.00731688	1	7	centromere complex assembly	0.00934765	6	Brain	cid
GO:0042308	0.00729573	172.472	0.00731688	1	7	negative regulation of protein import into nucleus	0.00934765	6	Brain	cos
GO:1900181	0.00729573	172.472	0.00731688	1	7	negative regulation of protein localization to nucleus	0.00934765	6	Brain	cos
GO:1904590	0.00729573	172.472	0.00731688	1	7	negative regulation of protein import	0.00934765	6	Brain	cos
GO:0035292	0.00833395	147.821	0.00836215	1	8	specification of segmental identity, trunk	0.00937118	6	Brain	rt
GO:0051220	0.00833395	147.821	0.00836215	1	8	cytoplasmic sequestering of protein	0.00937118	6	Brain	cos
GO:0070727	0.00877629	8.53223	0.444239	3	425	cellular macromolecule localization	0.00937118	6	Brain	AP-1sigma; cos; WASp
GO:1902580	0.00900507	8.4493	0.44842	3	429	single-organism cellular localization	0.00937118	6	Brain	AP-1sigma; cid; cos
GO:0046823	0.00937118	129.333	0.00940741	1	9	negative regulation of nucleocytoplasmic transport	0.00937118	6	Brain	cos
GO:0051091	0.00937118	129.333	0.00940741	1	9	positive regulation of sequence-specific DNA binding transcription factor activity	0.00937118	6	Brain	cos
GO:0051383	0.00937118	129.333	0.00940741	1	9	kinetochore organization	0.00937118	6	Brain	cid
GO:0090317	0.00937118	129.333	0.00940741	1	9	negative regulation of intracellular protein transport	0.00937118	6	Brain	cos
GO:1903650	0.00937118	129.333	0.00940741	1	9	negative regulation of cytoplasmic transport	0.00937118	6	Brain	cos
GO:0000278	1.69355e-08	38.0161	0.606899	8	629	mitotic cell cycle	1.19223e-06	7	Brain	asp; Dl; feo; Klp3A; Klp61F; mus101; ncd; Orc5
GO:0007052	2.48677e-08	56.7907	0.213235	6	221	mitotic spindle organization	1.19223e-06	7	Brain	asp; feo; Klp3A; Klp61F; ncd; Orc5
GO:0007346	2.55478e-08	56.5231	0.2142	6	222	regulation of mitotic cell cycle	1.19223e-06	7	Brain	Dl; feo; Klp3A; Klp61F; mus101; ncd
GO:0060236	3.83302e-08	828	0.0077189	3	8	regulation of mitotic spindle organization	1.34156e-06	7	Brain	feo; Klp61F; ncd
GO:0007051	6.25962e-08	48.3056	0.248935	6	258	spindle organization	1.75269e-06	7	Brain	asp; feo; Klp3A; Klp61F; ncd; Orc5
GO:1903047	2.02763e-07	30.7534	0.528745	7	548	mitotic cell cycle process	4.73113e-06	7	Brain	asp; feo; Klp3A; Klp61F; mus101; ncd; Orc5
GO:0051726	4.07574e-07	34.704	0.341561	6	354	regulation of cell cycle	8.15147e-06	7	Brain	Dl; feo; Klp3A; Klp61F; mus101; ncd
GO:0007049	5.33098e-07	23.5922	0.944601	8	979	cell cycle	8.64111e-06	7	Brain	asp; Dl; feo; Klp3A; Klp61F; mus101; ncd; Orc5
GO:0090224	5.555e-07	275.778	0.0173675	3	18	regulation of spindle organization	8.64111e-06	7	Brain	feo; Klp61F; ncd
GO:0071822	7.42551e-07	25.1168	0.639704	7	663	protein complex subunit organization	9.88311e-06	7	Brain	asp; Dl; feo; Klp3A; Klp61F; ncd; Orc5
GO:0010564	8.15482e-07	43.8837	0.196832	5	204	regulation of cell cycle process	9.88311e-06	7	Brain	feo; Klp3A; Klp61F; mus101; ncd
GO:0007010	8.47124e-07	24.6015	0.652247	7	676	cytoskeleton organization	9.88311e-06	7	Brain	asp; Dl; feo; Klp3A; Klp61F; ncd; Orc5
GO:0000226	1.29478e-06	28.2353	0.415856	6	431	microtubule cytoskeleton organization	1.39438e-05	7	Brain	asp; feo; Klp3A; Klp61F; ncd; Orc5
GO:0007067	2.90937e-06	33.5521	0.254724	5	264	mitotic nuclear division	2.90937e-05	7	Brain	Klp3A; Klp61F; mus101; ncd; Orc5
GO:0022402	3.49664e-06	19.6339	0.804696	7	834	cell cycle process	3.26353e-05	7	Brain	asp; feo; Klp3A; Klp61F; mus101; ncd; Orc5
GO:0007017	4.81489e-06	22.2678	0.521026	6	540	microtubule-based process	4.21303e-05	7	Brain	asp; feo; Klp3A; Klp61F; ncd; Orc5
GO:0051297	5.28741e-06	48.8056	0.125432	4	130	centrosome organization	4.32203e-05	7	Brain	asp; feo; Klp61F; ncd
GO:1902589	5.5569e-06	16.8115	1.2823	8	1329	single-organism organelle organization	4.32203e-05	7	Brain	asp; Dl; feo; Klp3A; Klp61F; mus101; ncd; Orc5
GO:0031023	6.14379e-06	46.9237	0.130256	4	135	microtubule organizing center organization	4.527e-05	7	Brain	asp; feo; Klp61F; ncd
GO:0051301	6.90977e-06	27.9147	0.303932	5	315	cell division	4.83684e-05	7	Brain	asp; Dl; feo; Klp3A; ncd
GO:0070507	9.51927e-06	98.2778	0.0434188	3	45	regulation of microtubule cytoskeleton organization	6.34618e-05	7	Brain	feo; Klp61F; ncd
GO:0043933	1.25612e-05	15.943	0.974512	7	1010	macromolecular complex subunit organization	7.64916e-05	7	Brain	asp; Dl; feo; Klp3A; Klp61F; ncd; Orc5
GO:0043148	1.27743e-05	621.05	0.00578918	2	6	mitotic spindle stabilization	7.64916e-05	7	Brain	feo; Klp61F
GO:0031109	1.31128e-05	87.7872	0.0482431	3	50	microtubule polymerization or depolymerization	7.64916e-05	7	Brain	asp; feo; Klp61F
GO:0032886	1.5647e-05	82.5	0.0511377	3	53	regulation of microtubule-based process	8.76231e-05	7	Brain	feo; Klp61F; ncd
GO:0006261	2.89855e-05	66.4677	0.0627161	3	65	DNA-dependent DNA replication	0.000156076	7	Brain	CG2990; DNApol-alpha73; Orc5
GO:0007100	3.0609e-05	354.8	0.00868377	2	9	mitotic centrosome separation	0.000158714	7	Brain	Klp61F; ncd
GO:0006996	6.12683e-05	11.6463	1.76473	8	1829	organelle organization	0.000302555	7	Brain	asp; Dl; feo; Klp3A; Klp61F; mus101; ncd; Orc5
GO:0000280	6.38537e-05	17.2513	0.481467	5	499	nuclear division	0.000302555	7	Brain	Klp3A; Klp61F; mus101; ncd; Orc5
GO:0051298	6.48331e-05	50.1748	0.0820133	3	85	centrosome duplication	0.000302555	7	Brain	feo; Klp61F; ncd
GO:0048285	7.28744e-05	16.7562	0.494975	5	513	organelle fission	0.00032911	7	Brain	Klp3A; Klp61F; mus101; ncd; Orc5
GO:0006260	9.03631e-05	44.6848	0.091662	3	95	DNA replication	0.000395339	7	Brain	CG2990; DNApol-alpha73; Orc5
GO:0007464	0.000101648	177.3	0.0154378	2	16	R3/R4 cell fate commitment	0.000406592	7	Brain	Dl; lola
GO:0043146	0.000101648	177.3	0.0154378	2	16	spindle stabilization	0.000406592	7	Brain	feo; Klp61F
GO:0048854	0.000101648	177.3	0.0154378	2	16	brain morphogenesis	0.000406592	7	Brain	asp; lola
GO:0006259	0.000110946	21.8471	0.272091	4	282	DNA metabolic process	0.00041332	7	Brain	CG2990; DNApol-alpha73; Klp3A; Orc5
GO:0007098	0.000111667	41.5017	0.098416	3	102	centrosome cycle	0.00041332	7	Brain	feo; Klp61F; ncd
GO:0006270	0.000115139	165.467	0.0164027	2	17	DNA replication initiation	0.00041332	7	Brain	DNApol-alpha73; Orc5
GO:0048056	0.000115139	165.467	0.0164027	2	17	R3/R4 cell differentiation	0.00041332	7	Brain	Dl; lola
GO:0033043	0.00012697	21.0712	0.28174	4	292	regulation of organelle organization	0.000444396	7	Brain	feo; Klp3A; Klp61F; ncd
GO:0051493	0.000136013	38.739	0.10517	3	109	regulation of cytoskeleton organization	0.000464434	7	Brain	feo; Klp61F; ncd
GO:0016043	0.000149344	10.5152	2.66978	9	2767	cellular component organization	0.000497813	7	Brain	asp; Dl; feo; Klp3A; Klp61F; lola; mus101; ncd; Orc5
GO:0007018	0.000176439	35.3707	0.114819	3	119	microtubule-based movement	0.000564439	7	Brain	Klp3A; Klp61F; ncd
GO:0051299	0.000177408	130.589	0.0202621	2	21	centrosome separation	0.000564439	7	Brain	Klp61F; ncd
GO:0071840	0.000181427	10.1994	2.73346	9	2833	cellular component organization or biogenesis	0.000564439	7	Brain	asp; Dl; feo; Klp3A; Klp61F; lola; mus101; ncd; Orc5
GO:0007293	0.000194574	34.1806	0.118678	3	123	germarium-derived egg chamber formation	0.000592182	7	Brain	asp; Dl; feo
GO:0006928	0.000201856	13.3507	0.613653	5	636	movement of cell or subcellular component	0.000601274	7	Brain	Dl; Klp3A; Klp61F; lola; ncd
GO:0007026	0.000232789	112.755	0.0231567	2	24	negative regulation of microtubule depolymerization	0.000678969	7	Brain	feo; Klp61F
GO:0006461	0.000244135	17.6652	0.333843	4	346	protein complex assembly	0.000680875	7	Brain	asp; Klp3A; Klp61F; ncd
GO:0000003	0.00025157	9.52651	1.54282	7	1599	reproduction	0.000680875	7	Brain	asp; Dl; feo; Klp3A; lola; mus101; ncd
GO:0070271	0.000252355	17.5072	0.336737	4	349	protein complex biogenesis	0.000680875	7	Brain	asp; Klp3A; Klp61F; ncd
GO:0031111	0.000252896	107.843	0.0241216	2	25	negative regulation of microtubule polymerization or depolymerization	0.000680875	7	Brain	feo; Klp61F
GO:0044702	0.000281768	10.2955	1.06714	6	1106	single organism reproductive process	0.000744292	7	Brain	asp; Dl; feo; Klp3A; lola; mus101
GO:0031114	0.000295572	99.2	0.0260513	2	27	regulation of microtubule depolymerization	0.000766297	7	Brain	feo; Klp61F
GO:0043242	0.000318137	95.3769	0.0270162	2	28	negative regulation of protein complex disassembly	0.000795343	7	Brain	feo; Klp61F
GO:1901880	0.000318137	95.3769	0.0270162	2	28	negative regulation of protein depolymerization	0.000795343	7	Brain	feo; Klp61F
GO:0007019	0.000365718	88.55	0.0289459	2	30	microtubule depolymerization	0.000898255	7	Brain	feo; Klp61F
GO:1901879	0.00039073	85.4897	0.0299108	2	31	regulation of protein depolymerization	0.000943142	7	Brain	feo; Klp61F
GO:0098813	0.000399339	26.5606	0.151483	3	157	nuclear chromosome segregation	0.000947584	7	Brain	Klp3A; ncd; Orc5
GO:0043244	0.000416556	82.6333	0.0308756	2	32	regulation of protein complex disassembly	0.00097193	7	Brain	feo; Klp61F
GO:0019953	0.000423484	9.48523	1.14915	6	1191	sexual reproduction	0.00097193	7	Brain	asp; Dl; feo; Klp3A; lola; mus101
GO:0031110	0.000443193	79.9613	0.0318405	2	33	regulation of microtubule polymerization or depolymerization	0.000988109	7	Brain	feo; Klp61F
GO:0048477	0.000444649	11.1507	0.726542	5	753	oogenesis	0.000988109	7	Brain	asp; Dl; feo; lola; mus101
GO:0044703	0.000457668	9.33694	1.16555	6	1208	multi-organism reproductive process	0.000998327	7	Brain	asp; Dl; feo; Klp3A; lola; mus101
GO:0007292	0.00046701	11.0251	0.734261	5	761	female gamete generation	0.000998327	7	Brain	asp; Dl; feo; lola; mus101
GO:0001578	0.00047064	77.4562	0.0328053	2	34	microtubule bundle formation	0.000998327	7	Brain	Klp61F; ncd
GO:0065003	0.000525474	14.327	0.408137	4	423	macromolecular complex assembly	0.00109801	7	Brain	asp; Klp3A; Klp61F; ncd
GO:0007059	0.000576656	23.3333	0.171746	3	178	chromosome segregation	0.00118723	7	Brain	Klp3A; ncd; Orc5
GO:0022414	0.000609211	8.80663	1.22827	6	1273	reproductive process	0.00123608	7	Brain	asp; Dl; feo; Klp3A; lola; mus101
GO:0051494	0.000619983	66.9622	0.0376297	2	39	negative regulation of cytoskeleton organization	0.00123997	7	Brain	feo; Klp61F
GO:0051261	0.000719227	61.925	0.0405242	2	42	protein depolymerization	0.00141819	7	Brain	feo; Klp61F
GO:0007163	0.000752273	21.2378	0.188148	3	195	establishment or maintenance of cell polarity	0.00146275	7	Brain	asp; Dl; lola
GO:0007281	0.000893616	9.47515	0.84522	5	876	germ cell development	0.00171378	7	Brain	asp; Dl; feo; lola; mus101
GO:0090307	0.00097868	52.6723	0.0472783	2	49	mitotic spindle assembly	0.00185156	7	Brain	Klp3A; ncd
GO:1902850	0.00105993	50.5143	0.049208	2	51	microtubule cytoskeleton organization involved in mitosis	0.00197854	7	Brain	Klp3A; ncd
GO:0043624	0.00110174	49.5	0.0501729	2	52	cellular protein complex disassembly	0.00202952	7	Brain	feo; Klp61F
GO:0043241	0.00114433	48.5255	0.0511377	2	53	protein complex disassembly	0.0020806	7	Brain	feo; Klp61F
GO:0001752	0.00123186	46.6868	0.0530675	2	55	compound eye photoreceptor fate commitment	0.00221104	7	Brain	Dl; lola
GO:0032984	0.0012768	45.8185	0.0540323	2	56	macromolecular complex disassembly	0.00223441	7	Brain	feo; Klp61F
GO:0042706	0.0012768	45.8185	0.0540323	2	56	eye photoreceptor cell fate commitment	0.00223441	7	Brain	Dl; lola
GO:0022412	0.00135007	8.58865	0.925304	5	959	cellular process involved in reproduction in multicellular organism	0.00233345	7	Brain	asp; Dl; feo; lola; mus101
GO:0046552	0.00146435	42.6448	0.0578918	2	60	photoreceptor cell fate commitment	0.00250011	7	Brain	Dl; lola
GO:0007417	0.00152588	16.5027	0.240251	3	249	central nervous system development	0.00257377	7	Brain	asp; Dl; lola
GO:0003006	0.00159513	8.25036	0.960039	5	995	developmental process involved in reproduction	0.00265696	7	Brain	asp; Dl; feo; lola; mus101
GO:0042067	0.00161316	40.5377	0.0607864	2	63	establishment of ommatidial planar polarity	0.00265696	7	Brain	Dl; lola
GO:0051704	0.00168416	7.11031	1.48396	6	1538	multi-organism process	0.00274166	7	Brain	asp; Dl; feo; Klp3A; lola; mus101
GO:0007276	0.00186411	7.94425	0.993809	5	1030	gamete generation	0.00299972	7	Brain	asp; Dl; feo; lola; mus101
GO:0007088	0.00193155	36.8896	0.0665755	2	69	regulation of mitotic nuclear division	0.00307292	7	Brain	Klp3A; ncd
GO:1903046	0.00211434	14.6727	0.269197	3	279	meiotic cell cycle process	0.00332593	7	Brain	asp; Klp3A; ncd
GO:0051783	0.00215909	34.8	0.070435	2	73	regulation of nuclear division	0.00333874	7	Brain	Klp3A; ncd
GO:0051321	0.00217995	14.5114	0.272091	3	282	meiotic cell cycle	0.00333874	7	Brain	asp; Klp3A; ncd
GO:0045132	0.00221788	34.3139	0.0713999	2	74	meiotic chromosome segregation	0.00333874	7	Brain	Klp3A; ncd
GO:0048663	0.00221788	34.3139	0.0713999	2	74	neuron fate commitment	0.00333874	7	Brain	Dl; lola
GO:0050794	0.00225908	6.25307	2.91292	8	3019	regulation of cellular process	0.00336458	7	Brain	Dl; feo; Klp3A; Klp61F; lola; mus101; ncd; Orc5
GO:0022411	0.00239877	32.9333	0.0742944	2	77	cellular component disassembly	0.0035038	7	Brain	feo; Klp61F
GO:0048523	0.0024026	7.46544	1.0517	5	1090	negative regulation of cellular process	0.0035038	7	Brain	Dl; feo; Klp61F; mus101; Orc5
GO:0010639	0.00258645	31.659	0.077189	2	80	negative regulation of organelle organization	0.00373302	7	Brain	feo; Klp61F
GO:0051128	0.0027625	8.97027	0.63681	4	660	regulation of cellular component organization	0.00394642	7	Brain	feo; Klp3A; Klp61F; ncd
GO:0051225	0.00284717	30.1049	0.0810485	2	84	spindle assembly	0.00398603	7	Brain	Klp3A; ncd
GO:0051231	0.00284717	30.1049	0.0810485	2	84	spindle elongation	0.00398603	7	Brain	Klp3A; ncd
GO:0007143	0.00291421	29.7398	0.0820133	2	85	female meiotic division	0.0040395	7	Brain	Klp3A; ncd
GO:0048609	0.00325433	6.92341	1.126	5	1167	multicellular organismal reproductive process	0.00446672	7	Brain	asp; Dl; feo; lola; mus101
GO:0030154	0.00328839	5.81186	2.334	7	2419	cell differentiation	0.00446965	7	Brain	asp; Dl; feo; Klp61F; lola; mus101; Orc5
GO:0051302	0.00340426	27.4111	0.0887674	2	92	regulation of cell division	0.00458266	7	Brain	Klp3A; ncd
GO:0008356	0.00385297	25.6854	0.0945566	2	98	asymmetric cell division	0.00513729	7	Brain	asp; Dl
GO:0050789	0.00414264	5.55319	3.18212	8	3298	regulation of biological process	0.00543003	7	Brain	Dl; feo; Klp3A; Klp61F; lola; mus101; ncd; Orc5
GO:0048519	0.00417671	6.50116	1.19161	5	1235	negative regulation of biological process	0.00543003	7	Brain	Dl; feo; Klp61F; mus101; Orc5
GO:0048869	0.00418888	5.52476	2.43049	7	2519	cellular developmental process	0.00543003	7	Brain	asp; Dl; feo; Klp61F; lola; mus101; Orc5
GO:0001736	0.00432784	24.1627	0.100346	2	104	establishment of planar polarity	0.00550816	7	Brain	Dl; lola
GO:0007164	0.00432784	24.1627	0.100346	2	104	establishment of tissue polarity	0.00550816	7	Brain	Dl; lola
GO:0061640	0.00465884	23.2434	0.104205	2	108	cytoskeleton-dependent cytokinesis	0.00587601	7	Brain	feo; Klp3A
GO:0030037	0.00481579	282.295	0.00482431	1	5	actin filament reorganization involved in cell cycle	0.00591412	7	Brain	asp
GO:0045468	0.00481579	282.295	0.00482431	1	5	regulation of R8 cell spacing in compound eye	0.00591412	7	Brain	Dl
GO:0090527	0.00481579	282.295	0.00482431	1	5	actin filament reorganization	0.00591412	7	Brain	asp
GO:0000910	0.00500127	22.3909	0.108065	2	112	cytokinesis	0.0060885	7	Brain	feo; Klp3A
GO:0001738	0.00535506	21.5982	0.111924	2	116	morphogenesis of a polarized epithelium	0.006463	7	Brain	Dl; lola
GO:0007451	0.00577639	225.818	0.00578918	1	6	dorsal/ventral lineage restriction, imaginal disc	0.00668343	7	Brain	Dl
GO:0032837	0.00577639	225.818	0.00578918	1	6	distributive segregation	0.00668343	7	Brain	ncd
GO:0033314	0.00577639	225.818	0.00578918	1	6	mitotic DNA replication checkpoint	0.00668343	7	Brain	mus101
GO:0035155	0.00577639	225.818	0.00578918	1	6	negative regulation of terminal cell fate specification, open tracheal system	0.00668343	7	Brain	Dl
GO:0051262	0.00577639	225.818	0.00578918	1	6	protein tetramerization	0.00668343	7	Brain	Klp61F
GO:0032504	0.00649783	5.80187	1.31897	5	1367	multicellular organism reproduction	0.00745653	7	Brain	asp; Dl; feo; lola; mus101
GO:0035156	0.00673614	188.167	0.00675404	1	7	fusion cell fate specification	0.00766715	7	Brain	Dl
GO:0051129	0.00688226	18.9154	0.127362	2	132	negative regulation of cellular component organization	0.00777029	7	Brain	feo; Klp61F
GO:0007420	0.00729168	18.3448	0.131221	2	136	brain development	0.00812812	7	Brain	asp; lola
GO:0065007	0.00731531	4.9394	3.46289	8	3589	biological regulation	0.00812812	7	Brain	Dl; feo; Klp3A; Klp61F; lola; mus101; ncd; Orc5
GO:0006271	0.00769505	161.273	0.0077189	1	8	DNA strand elongation involved in DNA replication	0.00841646	7	Brain	CG2990
GO:0022616	0.00769505	161.273	0.0077189	1	8	DNA strand elongation	0.00841646	7	Brain	CG2990
GO:0007015	0.00814315	17.3	0.13894	2	144	actin filament organization	0.00883753	7	Brain	asp; Dl
GO:0016330	0.0086531	141.102	0.00868377	1	9	second mitotic wave involved in compound eye morphogenesis	0.00917753	7	Brain	Dl
GO:0035154	0.0086531	141.102	0.00868377	1	9	terminal cell fate specification, open tracheal system	0.00917753	7	Brain	Dl
GO:0051383	0.0086531	141.102	0.00868377	1	9	kinetochore organization	0.00917753	7	Brain	asp
GO:0010623	0.00892347	16.4779	0.145694	2	151	developmental programmed cell death	0.00939313	7	Brain	Dl; lola
GO:0051179	0.00902699	4.85257	2.05419	6	2129	localization	0.00943119	7	Brain	asp; CG32576; Dl; feo; Klp61F; ncd
GO:0000076	0.00961031	125.414	0.00964863	1	10	DNA replication checkpoint	0.00974959	7	Brain	mus101
GO:0030723	0.00961031	125.414	0.00964863	1	10	ovarian fusome organization	0.00974959	7	Brain	asp
GO:0035161	0.00961031	125.414	0.00964863	1	10	imaginal disc lineage restriction	0.00974959	7	Brain	Dl
GO:1902115	0.00961031	125.414	0.00964863	1	10	regulation of organelle assembly	0.00974959	7	Brain	ncd
GO:0045165	0.00979776	8.31315	0.465064	3	482	cell fate commitment	0.00985317	7	Brain	Dl; lola; Orc5
GO:0022607	0.00985317	6.1302	0.907936	4	941	cellular component assembly	0.00985317	7	Brain	asp; Klp3A; Klp61F; ncd
GO:0090304	0.000264669	4.38928	4.03626	12	1731	nucleic acid metabolic process	0.00792086	8	Brain	brat; CG15390; CG7747; CG9667; esc; Gug; Irbp; Mad; MAGE; phr; sbb; ytr
GO:0006725	0.000562412	3.86135	5.0599	13	2170	cellular aromatic compound metabolic process	0.00792086	8	Brain	brat; bsk; CG15390; CG7747; CG9667; esc; Gug; Irbp; Mad; MAGE; phr; sbb; ytr
GO:0055070	0.000617363	65.5767	0.037308	2	16	copper ion homeostasis	0.00792086	8	Brain	CG11825; Syx5
GO:1901360	0.000781544	3.70835	5.23012	13	2243	organic cyclic compound metabolic process	0.00792086	8	Brain	brat; bsk; CG15390; CG7747; CG9667; esc; Gug; Irbp; Mad; MAGE; phr; sbb; ytr
GO:0045879	0.000875934	53.9913	0.0443033	2	19	negative regulation of smoothened signaling pathway	0.00792086	8	Brain	Gug; sbb
GO:0006139	0.00124186	3.60657	4.76377	12	2043	nucleobase-containing compound metabolic process	0.00792086	8	Brain	brat; CG15390; CG7747; CG9667; esc; Gug; Irbp; Mad; MAGE; phr; sbb; ytr
GO:0031056	0.00140361	41.7037	0.055962	2	24	regulation of histone modification	0.00792086	8	Brain	esc; Gug
GO:0046483	0.00183724	3.42163	4.97596	12	2134	heterocycle metabolic process	0.00792086	8	Brain	brat; CG15390; CG7747; CG9667; esc; Gug; Irbp; Mad; MAGE; phr; sbb; ytr
GO:0007406	0.00191126	35.2764	0.0652891	2	28	negative regulation of neuroblast proliferation	0.00792086	8	Brain	brat; MAGE
GO:2000178	0.00191126	35.2764	0.0652891	2	28	negative regulation of neural precursor cell proliferation	0.00792086	8	Brain	brat; MAGE
GO:0033554	0.00200161	5.31994	1.36641	6	586	cellular response to stress	0.00792086	8	Brain	bsk; CG5823; Irbp; MAGE; phr; SNF4Agamma
GO:0055076	0.00219312	32.7513	0.0699526	2	30	transition metal ion homeostasis	0.00792086	8	Brain	CG11825; Syx5
GO:2000647	0.00234099	31.6194	0.0722843	2	31	negative regulation of stem cell proliferation	0.00792086	8	Brain	brat; MAGE
GO:0008589	0.00265049	29.5747	0.0769478	2	33	regulation of smoothened signaling pathway	0.00792086	8	Brain	Gug; sbb
GO:0048523	0.00274046	3.98768	2.54161	8	1090	negative regulation of cellular process	0.00792086	8	Brain	brat; bsk; esc; Gug; Mad; MAGE; sbb; Syx5
GO:0032268	0.002944	5.84553	1.00732	5	432	regulation of cellular protein metabolic process	0.00792086	8	Brain	brat; bsk; CG9286; esc; Gug
GO:0031399	0.0030195	7.53488	0.610919	4	262	regulation of protein modification process	0.00792086	8	Brain	bsk; CG9286; esc; Gug
GO:0044260	0.00307787	2.98435	8.48525	16	3639	cellular macromolecule metabolic process	0.00792086	8	Brain	brat; bsk; CG15390; CG5823; CG7747; CG9286; CG9667; esc; fdl; Gug; Irbp; Mad; MAGE; phr; sbb; ytr
GO:0048878	0.00341602	11.0697	0.30546	3	131	chemical homeostasis	0.00792086	8	Brain	CG11825; SNF4Agamma; Syx5
GO:0006935	0.00363999	7.13882	0.643564	4	276	chemotaxis	0.00792086	8	Brain	brat; bsk; Mad; sbb
GO:0006281	0.00364094	10.8136	0.312455	3	134	DNA repair	0.00792086	8	Brain	Irbp; MAGE; phr
GO:0051246	0.00375006	5.51069	1.06561	5	457	regulation of protein metabolic process	0.00792086	8	Brain	brat; bsk; CG9286; esc; Gug
GO:1902692	0.00387616	24.1131	0.0932701	2	40	regulation of neuroblast proliferation	0.00792086	8	Brain	brat; MAGE
GO:2000177	0.00406907	23.4929	0.0956018	2	41	regulation of neural precursor cell proliferation	0.00793344	8	Brain	brat; MAGE
GO:0048513	0.00421991	3.45189	3.35772	9	1440	organ development	0.00793344	8	Brain	brat; bsk; esc; fdl; Gug; Mad; sbb; Syx5; ytr
GO:0006974	0.00455902	6.68579	0.685535	4	294	cellular response to DNA damage stimulus	0.00813633	8	Brain	Irbp; MAGE; phr; SNF4Agamma
GO:0090150	0.00467406	21.8095	0.102597	2	44	establishment of protein localization to membrane	0.00813633	8	Brain	CG4942; CG5447
GO:0072091	0.00509908	20.8148	0.107261	2	46	regulation of stem cell proliferation	0.00831745	8	Brain	brat; MAGE
GO:0042592	0.00513205	6.4576	0.708853	4	304	homeostatic process	0.00831745	8	Brain	CG11825; Irbp; SNF4Agamma; Syx5
GO:0048666	0.00542022	4.2981	1.66953	6	716	neuron development	0.00849167	8	Brain	brat; bsk; esc; galectin; MAGE; sbb
GO:0016043	0.00569142	2.84818	6.45196	13	2767	cellular component organization	0.00862893	8	Brain	brat; bsk; CG16985; CG4942; CG5447; Chd3; esc; Gug; Irbp; Mad; MAGE; sbb; Syx5
GO:0048519	0.00592648	3.47142	2.87971	8	1235	negative regulation of biological process	0.00870452	8	Brain	brat; bsk; esc; Gug; Mad; MAGE; sbb; Syx5
GO:0016070	0.00627525	3.22584	3.56292	9	1528	RNA metabolic process	0.00892351	8	Brain	brat; CG15390; CG7747; CG9667; esc; Gug; Mad; sbb; ytr
GO:0008586	0.00672083	17.9477	0.123583	2	53	imaginal disc-derived wing vein morphogenesis	0.00892351	8	Brain	Gug; Mad
GO:0051241	0.0067243	8.61445	0.389403	3	167	negative regulation of multicellular organismal process	0.00892351	8	Brain	brat; Mad; MAGE
GO:0007224	0.00696928	17.6011	0.125915	2	54	smoothened signaling pathway	0.00892351	8	Brain	Gug; sbb
GO:0071840	0.00702489	2.7625	6.60585	13	2833	cellular component organization or biogenesis	0.00892351	8	Brain	brat; bsk; CG16985; CG4942; CG5447; Chd3; esc; Gug; Irbp; Mad; MAGE; sbb; Syx5
GO:0051093	0.00764822	8.20841	0.408057	3	175	negative regulation of developmental process	0.00905804	8	Brain	brat; Mad; MAGE
GO:0042330	0.00782966	5.69628	0.799791	4	343	taxis	0.00905804	8	Brain	brat; bsk; Mad; sbb
GO:0072657	0.00800426	16.3386	0.135242	2	58	protein localization to membrane	0.00905804	8	Brain	CG4942; CG5447
GO:0050768	0.00827321	16.0507	0.137573	2	59	negative regulation of neurogenesis	0.00905804	8	Brain	brat; MAGE
GO:0055065	0.00827321	16.0507	0.137573	2	59	metal ion homeostasis	0.00905804	8	Brain	CG11825; Syx5
GO:0000902	0.00843105	3.89429	1.83043	6	785	cell morphogenesis	0.00905804	8	Brain	brat; bsk; esc; MAGE; sbb; Syx5
GO:0048589	0.00847986	5.56127	0.818445	4	351	developmental growth	0.00905804	8	Brain	brat; bsk; Mad; sbb
GO:0051726	0.00873262	5.51223	0.82544	4	354	regulation of cell cycle	0.00912073	8	Brain	brat; Mad; SNF4Agamma; Syx5
GO:0048569	0.0089308	4.4326	1.31044	5	562	post-embryonic organ development	0.00912495	8	Brain	bsk; Gug; Mad; sbb; Syx5
GO:0048812	0.00953154	4.3588	1.33143	5	571	neuron projection morphogenesis	0.00953154	8	Brain	brat; bsk; esc; MAGE; sbb
GO:0043933	1.03399e-07	7.47477	3.08595	15	1010	macromolecular complex subunit organization	1.4786e-05	9	Brain	B52; brm; capt; CG13900; Df31; dpa; dre4; eIF-2beta; His2Av; Mcm2; Mcm7; polo; RpL12; smt3; Ssrp
GO:0022008	1.54905e-06	5.66809	4.357	16	1426	neurogenesis	0.000110757	9	Brain	Aats-gln; brm; capt; CG13900; CG5214; dre4; eIF-2beta; Fas1; Mcm2; msk; Nrt; Pdsw; polo; Sec61beta; smt3; Ssrp
GO:0015980	3.30758e-06	17.5592	0.41859	6	137	energy derivation by oxidation of organic compounds	0.000140574	9	Brain	CG32230; CG5214; CG9603; Pdsw; Pgm; smt3
GO:1903047	3.93214e-06	7.87374	1.67436	10	548	mitotic cell cycle process	0.000140574	9	Brain	B52; brm; CG13900; dpa; eIF-2beta; Mcm7; polo; RpII215; RpL12; smt3
GO:0044763	8.31804e-06	5.15765	17.596	31	5759	single-organism cellular process	0.000213205	9	Brain	Aats-arg; Aats-gln; B52; brm; capt; CG11089; CG13900; CG32230; CG5214; CG8108; CG9603; Cnx99A; Dhod; dpa; dre4; eIF-2beta; Fas1; Mcm2; Mcm7; msk; Nrt; Nup154; Pdsw; Pgm; polo; RpII215; RpL12; Sap-r; Sec61beta; smt3; Ssrp
GO:0016043	9.64727e-06	4.34242	8.45429	21	2767	cellular component organization	0.000213205	9	Brain	Aats-gln; B52; brm; capt; CG13900; Df31; dpa; dre4; eIF-2beta; Fas1; His2Av; Mcm2; Mcm7; msk; Nrt; Nup154; polo; RpL12; Sec61beta; smt3; Ssrp
GO:0007399	1.0742e-05	4.78799	5.04446	16	1651	nervous system development	0.000213205	9	Brain	Aats-gln; brm; capt; CG13900; CG5214; dre4; eIF-2beta; Fas1; Mcm2; msk; Nrt; Pdsw; polo; Sec61beta; smt3; Ssrp
GO:0000278	1.32894e-05	6.79668	1.92185	10	629	mitotic cell cycle	0.000213205	9	Brain	B52; brm; CG13900; dpa; eIF-2beta; Mcm7; polo; RpII215; RpL12; smt3
GO:0071840	1.42276e-05	4.21151	8.65595	21	2833	cellular component organization or biogenesis	0.000213205	9	Brain	Aats-gln; B52; brm; capt; CG13900; Df31; dpa; dre4; eIF-2beta; Fas1; His2Av; Mcm2; Mcm7; msk; Nrt; Nup154; polo; RpL12; Sec61beta; smt3; Ssrp
GO:0006091	1.49095e-05	13.3289	0.543861	6	178	generation of precursor metabolites and energy	0.000213205	9	Brain	CG32230; CG5214; CG9603; Pdsw; Pgm; smt3
GO:0006270	1.73745e-05	75.8265	0.0519418	3	17	DNA replication initiation	0.000225868	9	Brain	dpa; Mcm2; Mcm7
GO:0044238	2.19023e-05	4.27071	15.0876	28	4938	primary metabolic process	0.000261003	9	Brain	Aats-arg; Aats-gln; ApepP; B52; brm; CG11089; CG13900; CG14516; CG17337; CG32230; CG5214; CG5355; CG9603; Cnx99A; Dhod; dpa; dre4; eIF-2beta; Mcm2; Mcm7; msk; Pdsw; Pgm; polo; RpII215; RpL12; Sap-r; smt3
GO:0022402	2.59492e-05	5.73044	2.5482	11	834	cell cycle process	0.000285442	9	Brain	B52; brm; CG13900; dpa; eIF-2beta; Mcm2; Mcm7; polo; RpII215; RpL12; smt3
GO:0045333	3.24064e-05	15.9052	0.372759	5	122	cellular respiration	0.000331008	9	Brain	CG32230; CG5214; CG9603; Pdsw; smt3
GO:0006996	3.9761e-05	4.2465	5.58833	16	1829	organelle organization	0.000379055	9	Brain	B52; brm; capt; CG13900; Df31; dpa; dre4; eIF-2beta; His2Av; Mcm2; msk; Nup154; polo; RpL12; smt3; Ssrp
GO:0006261	4.38875e-05	23.7956	0.198601	4	65	DNA-dependent DNA replication	0.000392245	9	Brain	dpa; dre4; Mcm2; Mcm7
GO:0007052	5.04811e-05	10.6256	0.675243	6	221	mitotic spindle organization	0.000424635	9	Brain	CG13900; dpa; eIF-2beta; polo; RpL12; smt3
GO:0048699	5.80671e-05	5.21155	2.78041	11	910	generation of neurons	0.000461311	9	Brain	Aats-gln; brm; capt; CG5214; eIF-2beta; Fas1; msk; Nrt; polo; Sec61beta; smt3
GO:0008152	7.03479e-05	4.16426	18.0421	30	5905	metabolic process	0.00052946	9	Brain	Aats-arg; Aats-gln; ApepP; B52; brm; CG11089; CG13900; CG14516; CG17337; CG32230; CG5214; CG5355; CG8778; CG9603; Cnx99A; Dhod; dpa; dre4; eIF-2beta; Mcm2; Mcm7; msk; Pdsw; Pgm; polo; RpII215; RpL12; Sap-r; Sec61beta; smt3
GO:0007406	8.17834e-05	42.4251	0.0855512	3	28	negative regulation of neuroblast proliferation	0.000556906	9	Brain	brm; CG5214; polo
GO:2000178	8.17834e-05	42.4251	0.0855512	3	28	negative regulation of neural precursor cell proliferation	0.000556906	9	Brain	brm; CG5214; polo
GO:0044281	9.0545e-05	5.34197	2.4046	10	787	small molecule metabolic process	0.000588542	9	Brain	Aats-arg; Aats-gln; CG11089; CG32230; CG5214; CG9603; Dhod; Pdsw; Pgm; smt3
GO:0071704	0.000101532	3.78271	16.1997	28	5302	organic substance metabolic process	0.000631262	9	Brain	Aats-arg; Aats-gln; ApepP; B52; brm; CG11089; CG13900; CG14516; CG17337; CG32230; CG5214; CG5355; CG9603; Cnx99A; Dhod; dpa; dre4; eIF-2beta; Mcm2; Mcm7; msk; Pdsw; Pgm; polo; RpII215; RpL12; Sap-r; smt3
GO:2000647	0.000111507	37.8704	0.0947174	3	31	negative regulation of stem cell proliferation	0.000644507	9	Brain	brm; CG5214; polo
GO:0007049	0.000112676	4.81103	2.99124	11	979	cell cycle	0.000644507	9	Brain	B52; brm; CG13900; dpa; eIF-2beta; Mcm2; Mcm7; polo; RpII215; RpL12; smt3
GO:0007051	0.000118883	9.03795	0.788293	6	258	spindle organization	0.000653854	9	Brain	CG13900; dpa; eIF-2beta; polo; RpL12; smt3
GO:0071822	0.000133041	5.57339	2.02573	9	663	protein complex subunit organization	0.000704625	9	Brain	B52; capt; CG13900; Df31; dpa; eIF-2beta; polo; RpL12; smt3
GO:0033365	0.000144185	11.445	0.510252	5	167	protein localization to organelle	0.000736376	9	Brain	His2Av; msk; Nup154; Sec61beta; smt3
GO:0006267	0.000189067	137.711	0.0213878	2	7	pre-replicative complex assembly involved in nuclear cell cycle DNA replication	0.000844079	9	Brain	Mcm2; Mcm7
GO:0036388	0.000189067	137.711	0.0213878	2	7	pre-replicative complex assembly	0.000844079	9	Brain	Mcm2; Mcm7
GO:1902299	0.000189067	137.711	0.0213878	2	7	pre-replicative complex assembly involved in cell cycle DNA replication	0.000844079	9	Brain	Mcm2; Mcm7
GO:0006260	0.000193269	15.9121	0.290263	4	95	DNA replication	0.000844079	9	Brain	dpa; dre4; Mcm2; Mcm7
GO:0044710	0.000194788	3.63953	6.35829	16	2081	single-organism metabolic process	0.000844079	9	Brain	Aats-arg; Aats-gln; brm; CG11089; CG32230; CG5214; CG9603; Cnx99A; Dhod; Mcm2; Mcm7; msk; Pdsw; Pgm; Sap-r; smt3
GO:0048666	0.000237857	5.13232	2.18767	9	716	neuron development	0.000961447	9	Brain	Aats-gln; brm; capt; eIF-2beta; Fas1; msk; Nrt; Sec61beta; smt3
GO:1902692	0.000240486	28.6378	0.122216	3	40	regulation of neuroblast proliferation	0.000961447	9	Brain	brm; CG5214; polo
GO:0034622	0.000242042	7.88477	0.898287	6	294	cellular macromolecular complex assembly	0.000961447	9	Brain	B52; Df31; eIF-2beta; Mcm2; Mcm7; polo
GO:0033260	0.000251603	114.75	0.0244432	2	8	nuclear DNA replication	0.00097241	9	Brain	Mcm2; Mcm7
GO:2000177	0.000258926	27.882	0.125271	3	41	regulation of neural precursor cell proliferation	0.00097438	9	Brain	brm; CG5214; polo
GO:0048812	0.00027084	5.60616	1.74463	8	571	neuron projection morphogenesis	0.00099308	9	Brain	Aats-gln; brm; capt; eIF-2beta; Fas1; Nrt; Sec61beta; smt3
GO:0000226	0.000284232	6.37743	1.31688	7	431	microtubule cytoskeleton organization	0.00101613	9	Brain	capt; CG13900; dpa; eIF-2beta; polo; RpL12; smt3
GO:0031175	0.000330388	5.43402	1.79657	8	588	neuron projection development	0.0011438	9	Brain	Aats-gln; brm; capt; eIF-2beta; Fas1; Nrt; Sec61beta; smt3
GO:0030154	0.000335941	3.3692	7.39101	17	2419	cell differentiation	0.0011438	9	Brain	Aats-gln; brm; capt; CG13900; CG5214; dre4; eIF-2beta; Fas1; Mcm2; msk; Nrt; Pdsw; Pgm; polo; Sec61beta; smt3; Ssrp
GO:0044237	0.000351956	3.23243	14.2076	25	4650	cellular metabolic process	0.00117046	9	Brain	Aats-arg; Aats-gln; B52; brm; CG11089; CG13900; CG32230; CG5214; CG9603; Cnx99A; Dhod; dpa; dre4; eIF-2beta; Mcm2; Mcm7; msk; Pdsw; Pgm; polo; RpII215; RpL12; Sap-r; Sec61beta; smt3
GO:0072091	0.000364851	24.6299	0.140548	3	46	regulation of stem cell proliferation	0.00118577	9	Brain	brm; CG5214; polo
GO:0007409	0.00037513	7.24002	0.974672	6	319	axonogenesis	0.00119208	9	Brain	brm; capt; eIF-2beta; Fas1; Nrt; smt3
GO:0061564	0.000449357	6.98785	1.00828	6	330	axon development	0.00139691	9	Brain	brm; capt; eIF-2beta; Fas1; Nrt; smt3
GO:0034613	0.000542974	6.73158	1.04495	6	342	cellular protein localization	0.00159659	9	Brain	His2Av; msk; Nup154; polo; Sec61beta; smt3
GO:0048858	0.000547317	5.01512	1.93712	8	634	cell projection morphogenesis	0.00159659	9	Brain	Aats-gln; brm; capt; eIF-2beta; Fas1; Nrt; Sec61beta; smt3
GO:0048869	0.000553127	3.20218	7.69655	17	2519	cellular developmental process	0.00159659	9	Brain	Aats-gln; brm; capt; CG13900; CG5214; dre4; eIF-2beta; Fas1; Mcm2; msk; Nrt; Pdsw; Pgm; polo; Sec61beta; smt3; Ssrp
GO:0048667	0.000558248	5.66846	1.4727	7	482	cell morphogenesis involved in neuron differentiation	0.00159659	9	Brain	Aats-gln; brm; capt; eIF-2beta; Fas1; Nrt; smt3
GO:0006139	0.00057473	3.33516	6.24218	15	2043	nucleobase-containing compound metabolic process	0.0016049	9	Brain	Aats-arg; Aats-gln; B52; brm; CG11089; CG13900; CG32230; CG9603; Dhod; dpa; dre4; Mcm2; Mcm7; Pdsw; RpII215
GO:0001672	0.000588504	68.8278	0.0366648	2	12	regulation of chromatin assembly or disassembly	0.0016049	9	Brain	dre4; Ssrp
GO:0032990	0.000594823	4.94848	1.96157	8	642	cell part morphogenesis	0.0016049	9	Brain	Aats-gln; brm; capt; eIF-2beta; Fas1; Nrt; Sec61beta; smt3
GO:0009987	0.000662611	4.08879	23.493	33	7689	cellular process	0.00175469	9	Brain	Aats-arg; Aats-gln; B52; brm; capt; CG11089; CG13900; CG32230; CG5214; CG8108; CG9603; Cnx99A; Df31; Dhod; dpa; dre4; eIF-2beta; Fas1; His2Av; Mcm2; Mcm7; msk; Nrt; Nup154; Pdsw; Pgm; polo; RpII215; RpL12; Sap-r; Sec61beta; smt3; Ssrp
GO:0030182	0.000699903	4.3823	2.53293	9	829	neuron differentiation	0.00181975	9	Brain	Aats-gln; brm; capt; eIF-2beta; Fas1; msk; Nrt; Sec61beta; smt3
GO:0050768	0.00076026	18.8923	0.180269	3	59	negative regulation of neurogenesis	0.00194138	9	Brain	brm; CG5214; polo
GO:0072594	0.000889464	10.4527	0.433867	4	142	establishment of protein localization to organelle	0.00223146	9	Brain	msk; Nup154; Sec61beta; smt3
GO:0046483	0.000922171	3.16392	6.52022	15	2134	heterocycle metabolic process	0.00227363	9	Brain	Aats-arg; Aats-gln; B52; brm; CG11089; CG13900; CG32230; CG9603; Dhod; dpa; dre4; Mcm2; Mcm7; Pdsw; RpII215
GO:0000904	0.000957767	5.14804	1.61325	7	528	cell morphogenesis involved in differentiation	0.00232137	9	Brain	Aats-gln; brm; capt; eIF-2beta; Fas1; Nrt; smt3
GO:0044744	0.00105451	16.7837	0.201656	3	66	protein targeting to nucleus	0.00251324	9	Brain	msk; Nup154; smt3
GO:0007017	0.00109242	5.02705	1.64992	7	540	microtubule-based process	0.0025439	9	Brain	capt; CG13900; dpa; eIF-2beta; polo; RpL12; smt3
GO:0006725	0.00110295	3.10017	6.63022	15	2170	cellular aromatic compound metabolic process	0.0025439	9	Brain	Aats-arg; Aats-gln; B52; brm; CG11089; CG13900; CG32230; CG9603; Dhod; dpa; dre4; Mcm2; Mcm7; Pdsw; RpII215
GO:0097485	0.00115454	7.13002	0.80357	5	263	neuron projection guidance	0.00262061	9	Brain	brm; capt; eIF-2beta; Fas1; Nrt
GO:0010721	0.00119979	16.0169	0.210823	3	69	negative regulation of cell development	0.00264586	9	Brain	brm; CG5214; polo
GO:0006333	0.00120267	9.60706	0.470531	4	154	chromatin assembly or disassembly	0.00264586	9	Brain	Df31; dre4; His2Av; Ssrp
GO:0006605	0.00123184	9.54266	0.473587	4	155	protein targeting	0.00265758	9	Brain	msk; Nup154; Sec61beta; smt3
GO:0030030	0.00127039	4.37064	2.20294	8	721	cell projection organization	0.00265758	9	Brain	Aats-gln; brm; capt; eIF-2beta; Fas1; Nrt; Sec61beta; smt3
GO:0055114	0.00129482	4.87396	1.6988	7	556	oxidation-reduction process	0.00265758	9	Brain	CG32230; CG5214; CG9603; Dhod; Pdsw; Pgm; smt3
GO:0006997	0.00130333	15.5433	0.216933	3	71	nucleus organization	0.00265758	9	Brain	msk; Nup154; polo
GO:0034504	0.00130333	15.5433	0.216933	3	71	protein localization to nucleus	0.00265758	9	Brain	msk; Nup154; smt3
GO:0048731	0.0013195	2.97144	7.49795	16	2454	system development	0.00265758	9	Brain	Aats-gln; brm; capt; CG13900; CG5214; dre4; eIF-2beta; Fas1; Mcm2; msk; Nrt; Pdsw; polo; Sec61beta; smt3; Ssrp
GO:0042775	0.00135714	15.3168	0.219989	3	72	mitochondrial ATP synthesis coupled electron transport	0.00269542	9	Brain	CG32230; CG9603; Pdsw
GO:0006935	0.0014304	6.78072	0.84329	5	276	chemotaxis	0.00280203	9	Brain	brm; capt; eIF-2beta; Fas1; Nrt
GO:0044699	0.00155558	3.46731	23.056	32	7546	single-organism process	0.00296724	9	Brain	Aats-arg; Aats-gln; B52; brm; capt; CG11089; CG13900; CG32230; CG5214; CG8108; CG9603; Cnx99A; Dhod; dpa; dre4; eIF-2beta; Fas1; His2Av; Mcm2; Mcm7; msk; Nrt; Nup154; Pdsw; Pgm; polo; RpII215; RpL12; Sap-r; Sec61beta; smt3; Ssrp
GO:1901360	0.00156487	2.97723	6.85326	15	2243	organic cyclic compound metabolic process	0.00296724	9	Brain	Aats-arg; Aats-gln; B52; brm; CG11089; CG13900; CG32230; CG9603; Dhod; dpa; dre4; Mcm2; Mcm7; Pdsw; RpII215
GO:0042773	0.00158632	14.4728	0.23221	3	76	ATP synthesis coupled electron transport	0.00296724	9	Brain	CG32230; CG9603; Pdsw
GO:0016482	0.00159775	6.60617	0.864678	5	283	cytoplasmic transport	0.00296724	9	Brain	Cnx99A; msk; Nup154; Sec61beta; smt3
GO:0065003	0.00163717	5.38759	1.29243	6	423	macromolecular complex assembly	0.00300148	9	Brain	B52; Df31; eIF-2beta; Mcm2; Mcm7; polo
GO:0070727	0.00167697	5.36098	1.29854	6	425	cellular macromolecule localization	0.00303553	9	Brain	His2Av; msk; Nup154; polo; Sec61beta; smt3
GO:0008285	0.00183843	13.7165	0.244432	3	80	negative regulation of cell proliferation	0.00328619	9	Brain	brm; CG5214; polo
GO:0022904	0.00197333	13.3671	0.250543	3	82	respiratory electron transport chain	0.00348378	9	Brain	CG32230; CG9603; Pdsw
GO:0006119	0.00211426	13.0349	0.256654	3	84	oxidative phosphorylation	0.00368706	9	Brain	CG32230; CG9603; Pdsw
GO:0000902	0.00218415	3.98867	2.39849	8	785	cell morphogenesis	0.00376305	9	Brain	Aats-gln; brm; capt; eIF-2beta; Fas1; Nrt; Sec61beta; smt3
GO:0007405	0.00226131	12.7188	0.262764	3	86	neuroblast proliferation	0.00384961	9	Brain	brm; CG5214; polo
GO:0061351	0.00233716	12.5663	0.26582	3	87	neural precursor cell proliferation	0.00393193	9	Brain	brm; CG5214; polo
GO:0022900	0.00241457	12.4175	0.268875	3	88	electron transport chain	0.00401493	9	Brain	CG32230; CG9603; Pdsw
GO:0055086	0.00255233	5.9086	0.962451	5	315	nucleobase-containing small molecule metabolic process	0.00419521	9	Brain	CG11089; CG32230; CG9603; Dhod; Pdsw
GO:0065004	0.0027401	11.8555	0.281097	3	92	protein-DNA complex assembly	0.00441052	9	Brain	Df31; Mcm2; Mcm7
GO:0034641	0.00276289	2.68657	8.82399	17	2888	cellular nitrogen compound metabolic process	0.00441052	9	Brain	Aats-arg; Aats-gln; B52; brm; CG11089; CG13900; CG32230; CG9603; Dhod; dpa; dre4; eIF-2beta; Mcm2; Mcm7; Pdsw; RpII215; RpL12
GO:0006807	0.00277585	2.65272	9.65201	18	3159	nitrogen compound metabolic process	0.00441052	9	Brain	Aats-arg; Aats-gln; B52; brm; CG11089; CG13900; CG32230; CG9603; Dhod; dpa; dre4; eIF-2beta; Mcm2; Mcm7; Pdsw; RpII215; RpL12; Sap-r
GO:0006612	0.00304065	27.4978	0.0824958	2	27	protein targeting to membrane	0.00477817	9	Brain	Nup154; Sec61beta
GO:0008283	0.0032438	5.57603	1.01745	5	333	cell proliferation	0.00498547	9	Brain	brm; CG5214; Mcm2; msk; polo
GO:0044786	0.00326826	26.438	0.0855512	2	28	cell cycle DNA replication	0.00498547	9	Brain	Mcm2; Mcm7
GO:0051961	0.00327716	11.1014	0.299429	3	98	negative regulation of nervous system development	0.00498547	9	Brain	brm; CG5214; polo
GO:0072089	0.00337249	10.9848	0.302485	3	99	stem cell proliferation	0.00507649	9	Brain	brm; CG5214; polo
GO:0044249	0.00344407	2.70732	7.40018	15	2422	cellular biosynthetic process	0.00511485	9	Brain	Aats-arg; Aats-gln; B52; brm; CG11089; Cnx99A; Dhod; dpa; dre4; eIF-2beta; Mcm2; Mcm7; Pgm; RpII215; RpL12
GO:0045596	0.00346951	10.8707	0.30554	3	100	negative regulation of cell differentiation	0.00511485	9	Brain	brm; CG5214; polo
GO:0006163	0.00359484	7.03287	0.635523	4	208	purine nucleotide metabolic process	0.00521304	9	Brain	CG11089; CG32230; CG9603; Pdsw
GO:1901988	0.00366866	10.6494	0.311651	3	102	negative regulation of cell cycle phase transition	0.00521304	9	Brain	brm; Mcm7; RpII215
GO:1901991	0.00366866	10.6494	0.311651	3	102	negative regulation of mitotic cell cycle phase transition	0.00521304	9	Brain	brm; Mcm7; RpII215
GO:0042330	0.00368194	5.40658	1.048	5	343	taxis	0.00521304	9	Brain	brm; capt; eIF-2beta; Fas1; Nrt
GO:0007010	0.00391981	3.95921	2.06545	7	676	cytoskeleton organization	0.00549542	9	Brain	capt; CG13900; dpa; eIF-2beta; polo; RpL12; smt3
GO:0033036	0.00460186	3.83773	2.12656	7	696	macromolecule localization	0.00629961	9	Brain	His2Av; msk; Nup154; polo; Sap-r; Sec61beta; smt3
GO:0009058	0.00464877	2.60712	7.62628	15	2496	biosynthetic process	0.00629961	9	Brain	Aats-arg; Aats-gln; B52; brm; CG11089; Cnx99A; Dhod; dpa; dre4; eIF-2beta; Mcm2; Mcm7; Pgm; RpII215; RpL12
GO:0010948	0.00465091	9.75476	0.339149	3	111	negative regulation of cell cycle process	0.00629961	9	Brain	brm; Mcm7; RpII215
GO:0008104	0.00466964	4.31795	1.59492	6	522	protein localization	0.00629961	9	Brain	His2Av; msk; Nup154; polo; Sec61beta; smt3
GO:0008038	0.00488873	9.57584	0.34526	3	113	neuron recognition	0.0064946	9	Brain	eIF-2beta; Fas1; Nrt
GO:0072521	0.00490501	6.42363	0.693576	4	227	purine-containing compound metabolic process	0.0064946	9	Brain	CG11089; CG32230; CG9603; Pdsw
GO:0008037	0.00501036	9.4888	0.348316	3	114	cell recognition	0.00649676	9	Brain	eIF-2beta; Fas1; Nrt
GO:0006120	0.00507574	20.8182	0.106939	2	35	mitochondrial electron transport, NADH to ubiquinone	0.00649676	9	Brain	CG32230; Pdsw
GO:0006913	0.0051338	9.40332	0.351371	3	115	nucleocytoplasmic transport	0.00649676	9	Brain	msk; Nup154; smt3
GO:0045930	0.0051338	9.40332	0.351371	3	115	negative regulation of mitotic cell cycle	0.00649676	9	Brain	brm; Mcm7; RpII215
GO:0051169	0.0051338	9.40332	0.351371	3	115	nuclear transport	0.00649676	9	Brain	msk; Nup154; smt3
GO:1902589	0.00539798	3.00011	4.06063	10	1329	single-organism organelle organization	0.00674409	9	Brain	B52; brm; capt; CG13900; dpa; eIF-2beta; Mcm2; polo; RpL12; smt3
GO:0032989	0.00542357	3.39897	2.78041	8	910	cellular component morphogenesis	0.00674409	9	Brain	Aats-gln; brm; capt; eIF-2beta; Fas1; Nrt; Sec61beta; smt3
GO:0006418	0.00596261	19.0787	0.116105	2	38	tRNA aminoacylation for protein translation	0.00735046	9	Brain	Aats-arg; Aats-gln
GO:0006099	0.00627287	18.5616	0.119161	2	39	tricarboxylic acid cycle	0.00760187	9	Brain	CG5214; smt3
GO:0043039	0.00627287	18.5616	0.119161	2	39	tRNA aminoacylation	0.00760187	9	Brain	Aats-arg; Aats-gln
GO:0044711	0.00638729	4.03176	1.70186	6	557	single-organism biosynthetic process	0.00767548	9	Brain	CG11089; Cnx99A; Dhod; Mcm2; Mcm7; Pgm
GO:0016310	0.00644235	4.02412	1.70491	6	558	phosphorylation	0.00767713	9	Brain	CG32230; CG9603; msk; Pdsw; polo; smt3
GO:0006101	0.00659036	18.0716	0.122216	2	40	citrate metabolic process	0.00772477	9	Brain	CG5214; smt3
GO:0043038	0.00659036	18.0716	0.122216	2	40	amino acid activation	0.00772477	9	Brain	Aats-arg; Aats-gln
GO:0043170	0.00670705	2.35758	13.0893	21	4284	macromolecule metabolic process	0.00779763	9	Brain	Aats-arg; Aats-gln; ApepP; B52; brm; CG13900; CG14516; CG17337; CG5355; Cnx99A; dpa; dre4; eIF-2beta; Mcm2; Mcm7; msk; Pgm; polo; RpII215; RpL12; smt3
GO:0071824	0.0069076	8.41646	0.391091	3	128	protein-DNA complex subunit organization	0.00789632	9	Brain	Df31; Mcm2; Mcm7
GO:0072350	0.00691505	17.6068	0.125271	2	41	tricarboxylic acid metabolic process	0.00789632	9	Brain	CG5214; smt3
GO:0006325	0.0069576	4.6166	1.2191	5	399	chromatin organization	0.00789632	9	Brain	brm; Df31; dre4; His2Av; Ssrp
GO:0007411	0.00737127	5.69393	0.779127	4	255	axon guidance	0.00829994	9	Brain	capt; eIF-2beta; Fas1; Nrt
GO:0009060	0.00758584	16.7453	0.131382	2	43	aerobic respiration	0.00840911	9	Brain	CG5214; smt3
GO:0042052	0.00758584	16.7453	0.131382	2	43	rhabdomere development	0.00840911	9	Brain	capt; msk
GO:0090150	0.00793185	16.3452	0.134438	2	44	establishment of protein localization to membrane	0.00865534	9	Brain	Nup154; Sec61beta
GO:0051276	0.00793526	3.84164	1.7813	6	583	chromosome organization	0.00865534	9	Brain	brm; Df31; dre4; His2Av; Mcm2; Ssrp
GO:0006886	0.00798954	5.55825	0.797459	4	261	intracellular protein transport	0.00865534	9	Brain	msk; Nup154; Sec61beta; smt3
GO:0045786	0.00849185	7.78667	0.421645	3	138	negative regulation of cell cycle	0.00913034	9	Brain	brm; Mcm7; RpII215
GO:0046034	0.00866106	7.72878	0.4247	3	139	ATP metabolic process	0.00924277	9	Brain	CG32230; CG9603; Pdsw
GO:0048468	0.00888522	2.65593	5.07196	11	1660	cell development	0.00941176	9	Brain	Aats-gln; brm; capt; CG5214; eIF-2beta; Fas1; msk; Nrt; polo; Sec61beta; smt3
GO:0009144	0.00935774	7.50551	0.436922	3	143	purine nucleoside triphosphate metabolic process	0.00962703	9	Brain	CG32230; CG9603; Pdsw
GO:0009205	0.00935774	7.50551	0.436922	3	143	purine ribonucleoside triphosphate metabolic process	0.00962703	9	Brain	CG32230; CG9603; Pdsw
GO:1901987	0.00935774	7.50551	0.436922	3	143	regulation of cell cycle phase transition	0.00962703	9	Brain	brm; Mcm7; RpII215
GO:1901990	0.00935774	7.50551	0.436922	3	143	regulation of mitotic cell cycle phase transition	0.00962703	9	Brain	brm; Mcm7; RpII215
GO:0009199	0.0095369	7.45167	0.439977	3	144	ribonucleoside triphosphate metabolic process	0.00967218	9	Brain	CG32230; CG9603; Pdsw
GO:0071103	0.0095369	7.45167	0.439977	3	144	DNA conformation change	0.00967218	9	Brain	Df31; dre4; Mcm2
GO:0009117	0.00980341	5.2256	0.846346	4	277	nucleotide metabolic process	0.00987244	9	Brain	CG11089; CG32230; CG9603; Pdsw
GO:1901576	0.0099886	2.40047	7.44906	14	2438	organic substance biosynthetic process	0.0099886	9	Brain	Aats-arg; Aats-gln; B52; brm; CG11089; Dhod; dpa; dre4; eIF-2beta; Mcm2; Mcm7; Pgm; RpII215; RpL12
GO:0055085	0.00035263	17.1116	0.377905	4	470	transmembrane transport	0.00351928	10	Brain	CG4476; CG6293; Glut1; Picot
GO:0098656	0.000469238	79.4103	0.0329661	2	41	anion transmembrane transport	0.00351928	10	Brain	CG4476; Picot
GO:0008360	0.00357212	27.4888	0.091662	2	114	regulation of cell shape	0.00949082	10	Brain	CG7115; CycE
GO:0006820	0.00434496	24.8044	0.101311	2	126	anion transport	0.00949082	10	Brain	CG4476; Picot
GO:0044745	0.00481559	276.044	0.00482431	1	6	amino acid transmembrane import	0.00949082	10	Brain	CG4476
GO:0034220	0.00618176	20.6007	0.121412	2	151	ion transmembrane transport	0.00949082	10	Brain	CG4476; Picot
GO:1900087	0.00641615	197.143	0.00643242	1	8	positive regulation of G1/S transition of mitotic cell cycle	0.00949082	10	Brain	CycE
GO:1902808	0.00641615	197.143	0.00643242	1	8	positive regulation of cell cycle G1/S phase transition	0.00949082	10	Brain	CycE
GO:0007311	0.00721555	172.486	0.00723647	1	9	maternal specification of dorsal/ventral axis, oocyte, germ-line encoded	0.00949082	10	Brain	ea
GO:0022604	0.00760151	18.4654	0.135081	2	168	regulation of cell morphogenesis	0.00949082	10	Brain	CG7115; CycE
GO:0006817	0.00801438	153.309	0.00804052	1	10	phosphate ion transport	0.00949082	10	Brain	Picot
GO:0045035	0.00801438	153.309	0.00804052	1	10	sensory organ precursor cell division	0.00949082	10	Brain	CycE
GO:0071705	0.00822538	17.7081	0.140709	2	175	nitrogen compound transport	0.00949082	10	Brain	CG4476; Glut1
GO:0043090	0.00961031	125.414	0.00964863	1	12	amino acid import	0.00961031	10	Brain	CG4476
GO:0090277	0.00961031	125.414	0.00964863	1	12	positive regulation of peptide hormone secretion	0.00961031	10	Brain	Glut1
GO:0016070	9.12704e-06	5.14021	4.42293	15	1528	RNA metabolic process	0.000529368	11	Brain	CG10092; CG4573; drk; hrg; l(1)10Bb; mbf1; nonA-l; rl; Rpb5; Rrp6; SF1; snRNP-U1-70K; Su(var)3-7; TfIIB; XNP
GO:0090304	4.1637e-05	4.44764	5.01053	15	1731	nucleic acid metabolic process	0.00120747	11	Brain	CG10092; CG4573; drk; hrg; l(1)10Bb; mbf1; nonA-l; rl; Rpb5; Rrp6; SF1; snRNP-U1-70K; Su(var)3-7; TfIIB; XNP
GO:0006139	0.000286574	3.65349	5.91364	15	2043	nucleobase-containing compound metabolic process	0.00271627	11	Brain	CG10092; CG4573; drk; hrg; l(1)10Bb; mbf1; nonA-l; rl; Rpb5; Rrp6; SF1; snRNP-U1-70K; Su(var)3-7; TfIIB; XNP
GO:0006397	0.000295473	7.62397	0.934952	6	323	mRNA processing	0.00271627	11	Brain	hrg; l(1)10Bb; nonA-l; Rrp6; SF1; snRNP-U1-70K
GO:0010467	0.000298805	3.54741	6.65176	16	2298	gene expression	0.00271627	11	Brain	CG10092; CG4573; drk; hrg; l(1)10Bb; mbf1; mRpL49; nonA-l; rl; Rpb5; Rrp6; SF1; snRNP-U1-70K; Su(var)3-7; TfIIB; XNP
GO:0045664	0.000347307	13.5929	0.338667	4	117	regulation of neuron differentiation	0.00271627	11	Brain	CHORD; drk; Lar; rl
GO:0045500	0.000361286	91.125	0.0289459	2	10	sevenless signaling pathway	0.00271627	11	Brain	drk; rl
GO:0022008	0.000442198	3.88508	4.12768	12	1426	neurogenesis	0.00271627	11	Brain	CG11583; CG1532; CHORD; drk; l(1)10Bb; Lar; mbf1; par-6; rl; SF1; snRNP-U1-70K; XNP
GO:0046483	0.000466995	3.46592	6.17705	15	2134	heterocycle metabolic process	0.00271627	11	Brain	CG10092; CG4573; drk; hrg; l(1)10Bb; mbf1; nonA-l; rl; Rpb5; Rrp6; SF1; snRNP-U1-70K; Su(var)3-7; TfIIB; XNP
GO:0046534	0.000527959	72.8882	0.0347351	2	12	positive regulation of photoreceptor cell differentiation	0.00271627	11	Brain	drk; rl
GO:0016071	0.000550476	6.74734	1.05074	6	363	mRNA metabolic process	0.00271627	11	Brain	hrg; l(1)10Bb; nonA-l; Rrp6; SF1; snRNP-U1-70K
GO:0006725	0.000561986	3.39609	6.28126	15	2170	cellular aromatic compound metabolic process	0.00271627	11	Brain	CG10092; CG4573; drk; hrg; l(1)10Bb; mbf1; nonA-l; rl; Rpb5; Rrp6; SF1; snRNP-U1-70K; Su(var)3-7; TfIIB; XNP
GO:0045466	0.00061609	20.4066	0.167886	3	58	R7 cell differentiation	0.00274871	11	Brain	drk; Lar; rl
GO:1901360	0.000807371	3.26141	6.49256	15	2243	organic cyclic compound metabolic process	0.00334482	11	Brain	CG10092; CG4573; drk; hrg; l(1)10Bb; mbf1; nonA-l; rl; Rpb5; Rrp6; SF1; snRNP-U1-70K; Su(var)3-7; TfIIB; XNP
GO:0050767	0.00147318	9.10193	0.497869	4	172	regulation of neurogenesis	0.00522984	11	Brain	CHORD; drk; Lar; rl
GO:0006378	0.00165258	38.3344	0.0607864	2	21	mRNA polyadenylation	0.00522984	11	Brain	hrg; Rrp6
GO:0007399	0.00165898	3.2831	4.77897	12	1651	nervous system development	0.00522984	11	Brain	CG11583; CG1532; CHORD; drk; l(1)10Bb; Lar; mbf1; par-6; rl; SF1; snRNP-U1-70K; XNP
GO:0006396	0.00179641	5.31156	1.31993	6	456	RNA processing	0.00522984	11	Brain	hrg; l(1)10Bb; nonA-l; Rrp6; SF1; snRNP-U1-70K
GO:0007465	0.00181453	36.4147	0.063681	2	22	R7 cell fate commitment	0.00522984	11	Brain	drk; rl
GO:0001932	0.00196277	8.39217	0.538394	4	186	regulation of protein phosphorylation	0.00522984	11	Brain	drk; par-6; rl; XNP
GO:0043631	0.00198373	34.6779	0.0665755	2	23	RNA polyadenylation	0.00522984	11	Brain	hrg; Rrp6
GO:0045467	0.00198373	34.6779	0.0665755	2	23	R7 cell development	0.00522984	11	Brain	Lar; rl
GO:0044260	0.00256494	2.71107	10.5334	19	3639	cellular macromolecule metabolic process	0.00640188	11	Brain	CG10092; CG4573; drk; hrg; l(1)10Bb; Lar; lid; mbf1; mRpL49; nonA-l; par-6; rl; Rpb5; Rrp6; SF1; snRNP-U1-70K; Su(var)3-7; TfIIB; XNP
GO:0042325	0.00264905	7.70391	0.584707	4	202	regulation of phosphorylation	0.00640188	11	Brain	drk; par-6; rl; XNP
GO:0070828	0.00293703	27.9977	0.0810485	2	28	heterochromatin organization	0.00662711	11	Brain	Su(var)3-7; XNP
GO:0031344	0.00297077	11.5314	0.289459	3	100	regulation of cell projection organization	0.00662711	11	Brain	CHORD; Lar; par-6
GO:0006469	0.00336766	25.9937	0.0868377	2	30	negative regulation of protein kinase activity	0.00697587	11	Brain	drk; par-6
GO:0033673	0.00336766	25.9937	0.0868377	2	30	negative regulation of kinase activity	0.00697587	11	Brain	drk; par-6
GO:0034332	0.00382599	24.2569	0.0926268	2	32	adherens junction organization	0.0071451	11	Brain	par-6; rl
GO:0006909	0.00384033	6.92102	0.648388	4	224	phagocytosis	0.0071451	11	Brain	Act42A; CG5861; par-6; Rab35
GO:0034641	0.00395383	2.65432	8.35957	16	2888	cellular nitrogen compound metabolic process	0.0071451	11	Brain	CG10092; CG4573; drk; hrg; l(1)10Bb; mbf1; mRpL49; nonA-l; rl; Rpb5; Rrp6; SF1; snRNP-U1-70K; Su(var)3-7; TfIIB; XNP
GO:0043408	0.00408918	10.2519	0.324194	3	112	regulation of MAPK cascade	0.0071451	11	Brain	drk; rl; XNP
GO:0044763	0.00423336	2.64253	16.6699	25	5759	single-organism cellular process	0.0071451	11	Brain	Act42A; CG10092; CG11583; CG1532; CG3036; CG32103; CG3408; CG4573; CG5919; CHORD; drk; l(1)10Bb; Lar; lid; mbf1; Mlc-c; mRpL49; par-6; Rab35; rl; Rpb5; SF1; snRNP-U1-70K; Su(var)3-7; XNP
GO:0008360	0.00429722	10.0655	0.329983	3	114	regulation of cell shape	0.0071451	11	Brain	drk; Lar; par-6
GO:0008293	0.0043117	22.7371	0.098416	2	34	torso signaling pathway	0.0071451	11	Brain	drk; rl
GO:0060284	0.00448583	6.61467	0.677334	4	234	regulation of cell development	0.00715551	11	Brain	CHORD; drk; Lar; rl
GO:0045666	0.00456472	22.0463	0.101311	2	35	positive regulation of neuron differentiation	0.00715551	11	Brain	drk; rl
GO:0019220	0.00483457	6.47128	0.691807	4	239	regulation of phosphate metabolic process	0.00718987	11	Brain	drk; par-6; rl; XNP
GO:0051174	0.00483457	6.47128	0.691807	4	239	regulation of phosphorus metabolic process	0.00718987	11	Brain	drk; par-6; rl; XNP
GO:0046532	0.00509092	20.7832	0.1071	2	37	regulation of photoreceptor cell differentiation	0.00738183	11	Brain	drk; rl
GO:0006418	0.00536401	20.2042	0.109994	2	38	tRNA aminoacylation for protein translation	0.00758811	11	Brain	CG10092; CG4573
GO:0043039	0.00564371	19.6566	0.112889	2	39	tRNA aminoacylation	0.0077937	11	Brain	CG10092; CG4573
GO:0043038	0.00592999	19.1378	0.115784	2	40	amino acid activation	0.00795153	11	Brain	CG10092; CG4573
GO:0031324	0.00605844	4.09844	1.68755	6	583	negative regulation of cellular metabolic process	0.00795153	11	Brain	drk; par-6; rl; snRNP-U1-70K; Su(var)3-7; XNP
GO:0031399	0.0066755	5.88324	0.758382	4	262	regulation of protein modification process	0.00795153	11	Brain	drk; par-6; rl; XNP
GO:0000165	0.00673542	8.51492	0.387875	3	134	MAPK cascade	0.00795153	11	Brain	drk; rl; XNP
GO:0023014	0.00673542	8.51492	0.387875	3	134	signal transduction by protein phosphorylation	0.00795153	11	Brain	drk; rl; XNP
GO:0022603	0.00676474	5.86004	0.761277	4	263	regulation of anatomical structure morphogenesis	0.00795153	11	Brain	drk; Lar; par-6; rl
GO:0031124	0.00682788	17.7331	0.124467	2	43	mRNA 3'-end processing	0.00795153	11	Brain	hrg; Rrp6
GO:0051960	0.00685476	5.83702	0.764171	4	264	regulation of nervous system development	0.00795153	11	Brain	CHORD; drk; Lar; rl
GO:0000377	0.00741174	5.70254	0.781539	4	270	RNA splicing, via transesterification reactions with bulged adenosine as nucleophile	0.00821565	11	Brain	l(1)10Bb; nonA-l; SF1; snRNP-U1-70K
GO:0000398	0.00741174	5.70254	0.781539	4	270	mRNA splicing, via spliceosome	0.00821565	11	Brain	l(1)10Bb; nonA-l; SF1; snRNP-U1-70K
GO:0000375	0.0075074	5.68071	0.784434	4	271	RNA splicing, via transesterification reactions	0.00821565	11	Brain	l(1)10Bb; nonA-l; SF1; snRNP-U1-70K
GO:0051348	0.00778356	16.5201	0.133151	2	46	negative regulation of transferase activity	0.00836012	11	Brain	drk; par-6
GO:0008380	0.00893368	5.39146	0.824958	4	285	RNA splicing	0.00936482	11	Brain	l(1)10Bb; nonA-l; SF1; snRNP-U1-70K
GO:0045595	0.00904189	5.3719	0.827852	4	286	regulation of cell differentiation	0.00936482	11	Brain	CHORD; drk; Lar; rl
GO:0001933	0.00950205	14.8283	0.147624	2	51	negative regulation of protein phosphorylation	0.00966876	11	Brain	drk; par-6
GO:0006807	0.00995981	2.35647	9.14401	16	3159	nitrogen compound metabolic process	0.00995981	11	Brain	CG10092; CG4573; drk; hrg; l(1)10Bb; mbf1; mRpL49; nonA-l; rl; Rpb5; Rrp6; SF1; snRNP-U1-70K; Su(var)3-7; TfIIB; XNP
GO:0031123	1.92674e-05	29.8778	0.161856	4	61	RNA 3'-end processing	0.00180482	12	Brain	CG1091; CG3689; piwi; Srp54
GO:0044237	3.916e-05	4.48364	12.3382	24	4650	cellular metabolic process	0.00180482	12	Brain	Cam; Cat; CG1091; CG12400; CG17691; CG2051; CG3605; CG3689; CG7712; CG7718; Dref; FK506-bp2; Gip; Ide; kis; mRpL10; mRpS17; mRpS26; piwi; Srp54; Tal; Ugt86Da; Ulp1; wds
GO:0008152	5.15663e-05	4.99609	15.6682	27	5905	metabolic process	0.00180482	12	Brain	Cam; Cat; CG1091; CG12400; CG17691; CG2051; CG3605; CG3689; CG6950; CG7712; CG7718; CG9436; Dref; FK506-bp2; Gip; Ide; kis; Lis-1; mRpL10; mRpS17; mRpS26; piwi; Srp54; Tal; Ugt86Da; Ulp1; wds
GO:0032388	0.000157278	33.4243	0.106135	3	40	positive regulation of intracellular transport	0.00293396	12	Brain	Cam; Lis-1; pav
GO:0009987	0.000190391	6.19533	20.4018	30	7689	cellular process	0.00293396	12	Brain	Cam; Cat; CG1091; CG12400; CG17691; CG2051; CG3605; CG3689; CG7712; CG7718; CG9186; Dref; FK506-bp2; Gip; HmgD; Ide; kis; Lis-1; mRpL10; mRpS17; mRpS26; pav; piwi; Sep1; Set; Srp54; Tal; Ugt86Da; Ulp1; wds
GO:0031124	0.000195391	30.91	0.114095	3	43	mRNA 3'-end processing	0.00293396	12	Brain	CG3689; piwi; Srp54
GO:0043933	0.000195597	4.95826	2.67991	10	1010	macromolecular complex subunit organization	0.00293396	12	Brain	Cam; CG2051; Dref; HmgD; Lis-1; pav; piwi; Set; Srp54; wds
GO:0051383	0.000242949	114.258	0.0238804	2	9	kinetochore organization	0.00318871	12	Brain	Cam; Lis-1
GO:0044710	0.000442733	3.68492	5.52167	14	2081	single-organism metabolic process	0.00516522	12	Brain	Cat; CG1091; CG12400; CG2051; CG7712; CG7718; CG9436; Dref; Gip; Ide; piwi; Tal; Ugt86Da; wds
GO:0048518	0.000560457	4.29596	3.05138	10	1150	positive regulation of biological process	0.00529474	12	Brain	Cam; CG2051; Dref; Ide; kis; Lis-1; pav; piwi; Sep1; wds
GO:0051531	0.000701575	61.4938	0.0398006	2	15	NFAT protein import into nucleus	0.00529474	12	Brain	Cam; pav
GO:0051532	0.000701575	61.4938	0.0398006	2	15	regulation of NFAT protein import into nucleus	0.00529474	12	Brain	Cam; pav
GO:0051533	0.000701575	61.4938	0.0398006	2	15	positive regulation of NFAT protein import into nucleus	0.00529474	12	Brain	Cam; pav
GO:0051276	0.000705965	5.52858	1.54692	7	583	chromosome organization	0.00529474	12	Brain	Cam; CG2051; HmgD; Lis-1; piwi; Set; wds
GO:0031440	0.00080047	57.0968	0.042454	2	16	regulation of mRNA 3'-end processing	0.005594	12	Brain	piwi; Srp54
GO:0032386	0.000860308	18.1412	0.188389	3	71	regulation of intracellular transport	0.005594	12	Brain	Cam; Lis-1; pav
GO:0042993	0.000905695	53.286	0.0451073	2	17	positive regulation of transcription factor import into nucleus	0.005594	12	Brain	Cam; pav
GO:0042307	0.001135	47.0095	0.0504141	2	19	positive regulation of protein import into nucleus	0.00595878	12	Brain	Cam; pav
GO:1900182	0.001135	47.0095	0.0504141	2	19	positive regulation of protein localization to nucleus	0.00595878	12	Brain	Cam; pav
GO:1904591	0.001135	47.0095	0.0504141	2	19	positive regulation of protein import	0.00595878	12	Brain	Cam; pav
GO:0042990	0.00138925	42.0543	0.0557208	2	21	regulation of transcription factor import into nucleus	0.00616124	12	Brain	Cam; pav
GO:0042991	0.00138925	42.0543	0.0557208	2	21	transcription factor import into nucleus	0.00616124	12	Brain	Cam; pav
GO:0051225	0.001401	15.2136	0.222883	3	84	spindle assembly	0.00616124	12	Brain	Cam; Lis-1; pav
GO:0048667	0.00149108	5.56863	1.27893	6	482	cell morphogenesis involved in neuron differentiation	0.00616124	12	Brain	Cam; Dref; HmgD; kis; Lis-1; Ulp1
GO:0071704	0.00152146	3.10428	14.0682	23	5302	organic substance metabolic process	0.00616124	12	Brain	Cam; CG1091; CG12400; CG17691; CG2051; CG3605; CG3689; CG7712; CG7718; Dref; FK506-bp2; Gip; Ide; kis; mRpL10; mRpS17; mRpS26; piwi; Srp54; Tal; Ugt86Da; Ulp1; wds
GO:0046824	0.00152564	39.9484	0.0583742	2	22	positive regulation of nucleocytoplasmic transport	0.00616124	12	Brain	Cam; pav
GO:0032880	0.00160191	14.4929	0.233497	3	88	regulation of protein localization	0.00622964	12	Brain	Cam; kis; pav
GO:0072499	0.00166817	38.043	0.0610276	2	23	photoreceptor cell axon guidance	0.00625564	12	Brain	Cam; Lis-1
GO:0006081	0.00181681	36.3109	0.063681	2	24	cellular aldehyde metabolic process	0.00645059	12	Brain	Gip; Tal
GO:0002682	0.00184302	8.59113	0.530675	4	200	regulation of immune system process	0.00645059	12	Brain	Cat; CG2051; Ide; Ulp1
GO:0006461	0.00202369	6.31703	0.918067	5	346	protein complex assembly	0.00685444	12	Brain	Cam; Lis-1; pav; Set; Srp54
GO:0070271	0.00210157	6.26038	0.926027	5	349	protein complex biogenesis	0.00689578	12	Brain	Cam; Lis-1; pav; Set; Srp54
GO:0000904	0.00236861	5.05832	1.40098	6	528	cell morphogenesis involved in differentiation	0.00713442	12	Brain	Cam; Dref; HmgD; kis; Lis-1; Ulp1
GO:0007098	0.00244403	12.4293	0.270644	3	102	centrosome cycle	0.00713442	12	Brain	Cam; Lis-1; pav
GO:0046716	0.00247179	30.7146	0.0742944	2	28	muscle cell cellular homeostasis	0.00713442	12	Brain	Cam; Lis-1
GO:0090316	0.00247179	30.7146	0.0742944	2	28	positive regulation of intracellular protein transport	0.00713442	12	Brain	Cam; pav
GO:0048813	0.00252216	7.85691	0.578435	4	218	dendrite morphogenesis	0.00713442	12	Brain	Dref; HmgD; Lis-1; Ulp1
GO:1903829	0.00265049	29.5747	0.0769478	2	29	positive regulation of cellular protein localization	0.00713442	12	Brain	Cam; pav
GO:0051050	0.00265399	12.0608	0.278604	3	105	positive regulation of transport	0.00713442	12	Brain	Cam; Lis-1; pav
GO:0016358	0.00282745	7.60368	0.597009	4	225	dendrite development	0.00713442	12	Brain	Dref; HmgD; Lis-1; Ulp1
GO:1903651	0.00283511	28.5161	0.0796012	2	30	positive regulation of cytoplasmic transport	0.00713442	12	Brain	Cam; pav
GO:1903047	0.00285377	4.86347	1.45405	6	548	mitotic cell cycle process	0.00713442	12	Brain	Cam; Dref; Lis-1; pav; Sep1; wds
GO:0018193	0.00296574	7.5	0.604969	4	228	peptidyl-amino acid modification	0.00724193	12	Brain	CG2051; FK506-bp2; Ulp1; wds
GO:0006793	0.00310004	3.8233	2.56316	8	966	phosphorus metabolic process	0.00724309	12	Brain	Cam; CG12400; CG17691; CG7712; CG7718; Dref; Tal; Ugt86Da
GO:0042306	0.00322199	26.6108	0.0849079	2	32	regulation of protein import into nucleus	0.00724309	12	Brain	Cam; pav
GO:1904589	0.00322199	26.6108	0.0849079	2	32	regulation of protein import	0.00724309	12	Brain	Cam; pav
GO:1900180	0.00342419	25.7503	0.0875613	2	33	regulation of protein localization to nucleus	0.00724309	12	Brain	Cam; pav
GO:1903533	0.00342419	25.7503	0.0875613	2	33	regulation of protein targeting	0.00724309	12	Brain	Cam; pav
GO:0048812	0.00350071	4.65644	1.51508	6	571	neuron projection morphogenesis	0.00724309	12	Brain	Cam; Dref; HmgD; kis; Lis-1; Ulp1
GO:0080134	0.0035126	7.14248	0.634156	4	239	regulation of response to stress	0.00724309	12	Brain	Cam; CG2051; Ide; Ulp1
GO:0018205	0.00351807	10.877	0.307791	3	116	peptidyl-lysine modification	0.00724309	12	Brain	CG2051; Ulp1; wds
GO:0006325	0.00374906	5.44326	1.0587	5	399	chromatin organization	0.00743158	12	Brain	CG2051; HmgD; piwi; Set; wds
GO:0031347	0.00378021	10.5931	0.315751	3	119	regulation of defense response	0.00743158	12	Brain	CG2051; Ide; Ulp1
GO:0006120	0.00384594	24.1857	0.0928681	2	35	mitochondrial electron transport, NADH to ubiquinone	0.00743158	12	Brain	CG12400; CG7712
GO:0048519	0.00389273	3.41905	3.27692	9	1235	negative regulation of biological process	0.00743158	12	Brain	Cam; CG1091; CG2051; Ide; kis; Lis-1; piwi; Ulp1; wds
GO:0034641	0.00401246	2.76453	7.66294	15	2888	cellular nitrogen compound metabolic process	0.00745233	12	Brain	CG1091; CG12400; CG2051; CG3605; CG3689; CG7712; Dref; kis; mRpL10; mRpS17; mRpS26; piwi; Srp54; Tal; Ugt86Da
GO:0031175	0.00404555	4.51394	1.56018	6	588	neuron projection development	0.00745233	12	Brain	Cam; Dref; HmgD; kis; Lis-1; Ulp1
GO:0019637	0.0044777	5.21072	1.1038	5	416	organophosphate metabolic process	0.00769256	12	Brain	CG12400; CG7712; CG7718; Tal; Ugt86Da
GO:0006139	0.00448495	2.91848	5.42084	12	2043	nucleobase-containing compound metabolic process	0.00769256	12	Brain	CG1091; CG12400; CG2051; CG3605; CG3689; CG7712; Dref; kis; piwi; Srp54; Tal; Ugt86Da
GO:0046822	0.00452152	22.1649	0.100828	2	38	regulation of nucleocytoplasmic transport	0.00769256	12	Brain	Cam; pav
GO:0051222	0.00452152	22.1649	0.100828	2	38	positive regulation of protein transport	0.00769256	12	Brain	Cam; pav
GO:0007051	0.00461295	6.59788	0.68457	4	258	spindle organization	0.00769256	12	Brain	Cam; Dref; Lis-1; pav
GO:0044238	0.00461554	2.66468	13.1024	21	4938	primary metabolic process	0.00769256	12	Brain	Cam; CG1091; CG12400; CG2051; CG3605; CG3689; CG7712; CG7718; Dref; FK506-bp2; Ide; kis; mRpL10; mRpS17; mRpS26; piwi; Srp54; Tal; Ugt86Da; Ulp1; wds
GO:0065003	0.00480544	5.12047	1.12238	5	423	macromolecular complex assembly	0.00772168	12	Brain	Cam; Lis-1; pav; Set; Srp54
GO:0051297	0.00484234	9.66693	0.344938	3	130	centrosome organization	0.00772168	12	Brain	Cam; Lis-1; pav
GO:0002376	0.00485363	5.10782	1.12503	5	424	immune system process	0.00772168	12	Brain	Cat; CG2051; Ide; kis; Ulp1
GO:0045089	0.00524793	20.4549	0.108788	2	41	positive regulation of innate immune response	0.00822437	12	Brain	CG2051; Ide
GO:0031023	0.00537899	9.29697	0.358205	3	135	microtubule organizing center organization	0.0083058	12	Brain	Cam; Lis-1; pav
GO:0000278	0.00561906	4.20225	1.66897	6	629	mitotic cell cycle	0.00855075	12	Brain	Cam; Dref; Lis-1; pav; Sep1; wds
GO:0042052	0.00576005	19.454	0.114095	2	43	rhabdomere development	0.00863376	12	Brain	Cam; Lis-1
GO:0048858	0.00583806	4.16702	1.68224	6	634	cell projection morphogenesis	0.00863376	12	Brain	Cam; Dref; HmgD; kis; Lis-1; Ulp1
GO:0009117	0.00592622	6.12909	0.734984	4	277	nucleotide metabolic process	0.00864241	12	Brain	CG12400; CG7712; Tal; Ugt86Da
GO:0006753	0.0061542	6.06097	0.742944	4	280	nucleoside phosphate metabolic process	0.00879944	12	Brain	CG12400; CG7712; Tal; Ugt86Da
GO:0032990	0.00620151	4.11181	1.70347	6	642	cell part morphogenesis	0.00879944	12	Brain	Cam; Dref; HmgD; kis; Lis-1; Ulp1
GO:0046483	0.00643919	2.76882	5.6623	12	2134	heterocycle metabolic process	0.0089513	12	Brain	CG1091; CG12400; CG2051; CG3605; CG3689; CG7712; Dref; kis; piwi; Srp54; Tal; Ugt86Da
GO:0048523	0.00647903	3.34847	2.89218	8	1090	negative regulation of cellular process	0.0089513	12	Brain	Cam; CG2051; Ide; kis; Lis-1; piwi; Ulp1; wds
GO:0006396	0.00658548	4.73274	1.20994	5	456	RNA processing	0.00896416	12	Brain	CG1091; CG3605; CG3689; piwi; Srp54
GO:0051239	0.00672816	4.03812	1.73265	6	653	regulation of multicellular organismal process	0.00896416	12	Brain	Cat; Dref; Ide; kis; Lis-1; Ulp1
GO:0001709	0.00680911	8.51389	0.390046	3	147	cell fate determination	0.00896416	12	Brain	Lis-1; pav; piwi
GO:0071822	0.00723483	3.97328	1.75919	6	663	protein complex subunit organization	0.00896416	12	Brain	Cam; Dref; Lis-1; pav; Set; Srp54
GO:0050793	0.00733943	3.96055	1.76449	6	665	regulation of developmental process	0.00896416	12	Brain	Cat; Dref; Ide; kis; Lis-1; Ulp1
GO:0006725	0.00738215	2.71309	5.75782	12	2170	cellular aromatic compound metabolic process	0.00896416	12	Brain	CG1091; CG12400; CG2051; CG3605; CG3689; CG7712; Dref; kis; piwi; Srp54; Tal; Ugt86Da
GO:0010035	0.00742745	16.9623	0.130015	2	49	response to inorganic substance	0.00896416	12	Brain	Cam; Cat
GO:0016441	0.00742745	16.9623	0.130015	2	49	posttranscriptional gene silencing	0.00896416	12	Brain	CG1091; piwi
GO:0035194	0.00742745	16.9623	0.130015	2	49	posttranscriptional gene silencing by RNA	0.00896416	12	Brain	CG1091; piwi
GO:0051052	0.00742745	16.9623	0.130015	2	49	regulation of DNA metabolic process	0.00896416	12	Brain	Dref; piwi
GO:0090307	0.00742745	16.9623	0.130015	2	49	mitotic spindle assembly	0.00896416	12	Brain	Cam; pav
GO:0033157	0.00772416	16.6075	0.132669	2	50	regulation of intracellular protein transport	0.00921632	12	Brain	Cam; pav
GO:1902850	0.00802616	16.2673	0.135322	2	51	microtubule cytoskeleton organization involved in mitosis	0.00946907	12	Brain	Cam; pav
GO:0008340	0.00859205	7.80064	0.42454	3	160	determination of adult lifespan	0.00986767	12	Brain	Cat; Ide; kis
GO:0032886	0.00864596	15.6268	0.140629	2	53	regulation of microtubule-based process	0.00986767	12	Brain	Lis-1; pav
GO:1903649	0.00864596	15.6268	0.140629	2	53	regulation of cytoplasmic transport	0.00986767	12	Brain	Cam; pav
GO:0031331	0.00896369	15.3251	0.143282	2	54	positive regulation of cellular catabolic process	0.00993393	12	Brain	piwi; wds
GO:0010259	0.00903888	7.6525	0.4325	3	163	multicellular organismal aging	0.00993393	12	Brain	Cat; Ide; kis
GO:0051301	0.0092595	5.36334	0.835812	4	315	cell division	0.00993393	12	Brain	Dref; pav; piwi; Sep1
GO:0055086	0.0092595	5.36334	0.835812	4	315	nucleobase-containing small molecule metabolic process	0.00993393	12	Brain	CG12400; CG7712; Tal; Ugt86Da
GO:0071840	0.00935434	2.50537	7.51701	14	2833	cellular component organization or biogenesis	0.00993393	12	Brain	Cam; CG2051; CG9186; Dref; HmgD; kis; Lis-1; mRpL10; pav; piwi; Set; Srp54; Ulp1; wds
GO:1903827	0.00961467	14.7551	0.148589	2	56	regulation of cellular protein localization	0.00993393	12	Brain	Cam; pav
GO:1901360	0.00963756	2.60562	5.95152	12	2243	organic cyclic compound metabolic process	0.00993393	12	Brain	CG1091; CG12400; CG2051; CG3605; CG3689; CG7712; Dref; kis; piwi; Srp54; Tal; Ugt86Da
GO:0007568	0.00965563	7.46341	0.443113	3	167	aging	0.00993393	12	Brain	Cat; Ide; kis
GO:0033365	0.00965563	7.46341	0.443113	3	167	protein localization to organelle	0.00993393	12	Brain	Cam; Lis-1; pav
GO:0007409	0.00966913	5.29349	0.846426	4	319	axonogenesis	0.00993393	12	Brain	Cam; kis; Lis-1; Ulp1
GO:0006807	0.00974471	2.45441	8.38201	15	3159	nitrogen compound metabolic process	0.00993393	12	Brain	CG1091; CG12400; CG2051; CG3605; CG3689; CG7712; Dref; kis; mRpL10; mRpS17; mRpS26; piwi; Srp54; Tal; Ugt86Da
GO:0060341	0.00997304	7.37229	0.44842	3	169	regulation of cellular localization	0.00999157	12	Brain	Cam; Lis-1; pav
GO:0022008	0.00999157	2.90764	3.78371	9	1426	neurogenesis	0.00999157	12	Brain	Cam; Dref; HmgD; kis; Lis-1; pav; Srp54; Ulp1; wds
GO:0035159	7.49719e-09	295.214	0.0257297	4	32	regulation of tube length, open tracheal system	3.67362e-07	13	Brain	Fas2; ft; grh; nrv2
GO:0035151	3.38382e-08	196.587	0.0369864	4	46	regulation of tube size, open tracheal system	7.78795e-07	13	Brain	Fas2; ft; grh; nrv2
GO:0035150	4.76813e-08	179.435	0.0402026	4	50	regulation of tube size	7.78795e-07	13	Brain	Fas2; ft; grh; nrv2
GO:0035152	2.62966e-07	114.398	0.061108	4	76	regulation of tube architecture, open tracheal system	3.22133e-06	13	Brain	Fas2; ft; grh; nrv2
GO:0090066	1.07507e-05	43.4007	0.154378	4	192	regulation of anatomical structure size	0.000105357	13	Brain	Fas2; ft; grh; nrv2
GO:0007424	2.11855e-05	36.3185	0.183324	4	228	open tracheal system development	0.000173015	13	Brain	Fas2; ft; grh; nrv2
GO:0060541	2.81112e-05	33.7095	0.196993	4	245	respiratory system development	0.000195271	13	Brain	Fas2; ft; grh; nrv2
GO:0035158	3.1881e-05	344.944	0.00884458	2	11	regulation of tube diameter, open tracheal system	0.000195271	13	Brain	Fas2; nrv2
GO:0035296	6.07594e-05	238.731	0.0120608	2	15	regulation of tube diameter	0.000330801	13	Brain	Fas2; nrv2
GO:0007156	0.000321993	96.8359	0.0273378	2	34	homophilic cell adhesion via plasma membrane adhesion molecules	0.00157777	13	Brain	Fas2; ft
GO:0007155	0.000630015	23.6703	0.180108	3	224	cell adhesion	0.00269613	13	Brain	Fas2; ft; nrv2
GO:0030154	0.000719451	9.68836	1.945	7	2419	cell differentiation	0.00269613	13	Brain	Ance; CG5800; CG7470; Fas2; ft; grh; nrv2
GO:0048468	0.000727282	9.76995	1.33473	6	1660	cell development	0.00269613	13	Brain	Ance; CG7470; Fas2; ft; grh; nrv2
GO:0022610	0.000770323	22.0434	0.192973	3	240	biological adhesion	0.00269613	13	Brain	Fas2; ft; nrv2
GO:0048869	0.000931736	9.20979	2.02541	7	2519	cellular developmental process	0.00304367	13	Brain	Ance; CG5800; CG7470; Fas2; ft; grh; nrv2
GO:0042067	0.00110709	50.6803	0.0506553	2	63	establishment of ommatidial planar polarity	0.00319101	13	Brain	ft; grh
GO:0098742	0.00110709	50.6803	0.0506553	2	63	cell-cell adhesion via plasma-membrane adhesion molecules	0.00319101	13	Brain	Fas2; ft
GO:0009653	0.00164898	8.19345	1.55102	6	1929	anatomical structure morphogenesis	0.00448888	13	Brain	Ance; CG7470; Fas2; ft; grh; nrv2
GO:0048592	0.00264091	14.1628	0.295891	3	368	eye morphogenesis	0.00618031	13	Brain	Fas2; ft; grh
GO:0090596	0.00264091	14.1628	0.295891	3	368	sensory organ morphogenesis	0.00618031	13	Brain	Fas2; ft; grh
GO:0001736	0.00298317	30.2083	0.0836215	2	104	establishment of planar polarity	0.00618031	13	Brain	ft; grh
GO:0007164	0.00298317	30.2083	0.0836215	2	104	establishment of tissue polarity	0.00618031	13	Brain	ft; grh
GO:0022008	0.00301809	7.74525	1.14658	5	1426	neurogenesis	0.00618031	13	Brain	CG5800; Fas2; ft; grh; nrv2
GO:0098609	0.00303979	29.9126	0.0844255	2	105	cell-cell adhesion	0.00618031	13	Brain	Fas2; ft
GO:0048513	0.00315322	7.65993	1.15784	5	1440	organ development	0.00618031	13	Brain	CG5800; Fas2; ft; grh; nrv2
GO:0008360	0.00357212	27.4888	0.091662	2	114	regulation of cell shape	0.00670746	13	Brain	Fas2; grh
GO:0001738	0.00369594	27.0022	0.0932701	2	116	morphogenesis of a polarized epithelium	0.00670746	13	Brain	ft; grh
GO:0009608	0.00401445	345.083	0.00402026	1	5	response to symbiont	0.00702528	13	Brain	Ance
GO:0009887	0.00423235	8.44738	0.7341	4	913	organ morphogenesis	0.00715122	13	Brain	Fas2; ft; grh; nrv2
GO:0001654	0.00478685	11.3804	0.36504	3	454	eye development	0.00761174	13	Brain	Fas2; ft; grh
GO:0045317	0.00481559	276.044	0.00482431	1	6	equator specification	0.00761174	13	Brain	ft
GO:0006560	0.00561616	230.019	0.00562837	1	7	proline metabolic process	0.00833768	13	Brain	CG7470
GO:0048104	0.00561616	230.019	0.00562837	1	7	establishment of body hair or bristle planar orientation	0.00833768	13	Brain	ft
GO:0007399	0.00578533	6.54982	1.32749	5	1651	nervous system development	0.00833768	13	Brain	CG5800; Fas2; ft; grh; nrv2
GO:0065008	0.00715386	7.20849	0.849079	4	1056	regulation of biological quality	0.00938171	13	Brain	Fas2; ft; grh; nrv2
GO:0007402	0.00721555	172.486	0.00723647	1	9	ganglion mother cell fate determination	0.00938171	13	Brain	grh
GO:0000904	0.00730098	9.71592	0.42454	3	528	cell morphogenesis involved in differentiation	0.00938171	13	Brain	Fas2; ft; grh
GO:0048856	0.00757976	5.89725	2.83831	7	3530	anatomical structure development	0.00938171	13	Brain	Ance; CG5800; CG7470; Fas2; ft; grh; nrv2
GO:0022604	0.00760151	18.4654	0.135081	2	168	regulation of cell morphogenesis	0.00938171	13	Brain	Fas2; grh
GO:0007552	0.00769137	9.5263	0.43258	3	538	metamorphosis	0.00938171	13	Brain	Ance; Fas2; ft
GO:0045571	0.00801438	153.309	0.00804052	1	10	negative regulation of imaginal disc growth	0.00938171	13	Brain	ft
GO:0048569	0.00867927	9.0989	0.451877	3	562	post-embryonic organ development	0.00938171	13	Brain	CG5800; Fas2; ft
GO:0030859	0.00881263	137.967	0.00884458	1	11	polarized epithelial cell differentiation	0.00938171	13	Brain	ft
GO:0045198	0.00881263	137.967	0.00884458	1	11	establishment of epithelial cell apical/basal polarity	0.00938171	13	Brain	ft
GO:0042127	0.00887183	17.0097	0.146338	2	182	regulation of cell proliferation	0.00938171	13	Brain	ft; grh
GO:0007423	0.00902475	8.96447	0.45831	3	570	sensory organ development	0.00938171	13	Brain	Fas2; ft; grh
GO:0060562	0.00906851	8.94794	0.459114	3	571	epithelial tube morphogenesis	0.00938171	13	Brain	Fas2; ft; grh
GO:0060429	0.00919025	6.67139	0.910991	4	1133	epithelium development	0.00938171	13	Brain	CG7470; Fas2; ft; grh
GO:0061343	0.00961031	125.414	0.00964863	1	12	cell adhesion involved in heart morphogenesis	0.00961031	13	Brain	nrv2
GO:0007052	2.97499e-06	31.3966	0.248774	5	221	mitotic spindle organization	9.72629e-05	14	Brain	Hsp83; RpL10Ab; RpL18A; RpL24; Top2
GO:0007098	4.00765e-06	50.3061	0.114819	4	102	centrosome cycle	9.72629e-05	14	Brain	Hsp83; RpL10Ab; RpL18A; RpL24
GO:0006457	4.33076e-06	49.292	0.11707	4	104	protein folding	9.72629e-05	14	Brain	ERp60; Hsp27; Hsp60; Hsp83
GO:0007051	6.34837e-06	26.7238	0.290424	5	258	spindle organization	9.72629e-05	14	Brain	Hsp83; RpL10Ab; RpL18A; RpL24; Top2
GO:0071704	6.48419e-06	Inf	5.96832	14	5302	organic substance metabolic process	9.72629e-05	14	Brain	bel; CG33303; ERp60; Hsp27; Hsp60; Hsp83; Oscp; RnrL; RpL10Ab; RpL18A; RpL24; RpS7; Top2; Vha68-2
GO:0051297	1.05201e-05	39.0381	0.146338	4	130	centrosome organization	0.000126727	14	Brain	Hsp83; RpL10Ab; RpL18A; RpL24
GO:0031023	1.2216e-05	37.5328	0.151966	4	135	microtubule organizing center organization	0.000126727	14	Brain	Hsp83; RpL10Ab; RpL18A; RpL24
GO:0044267	1.35175e-05	11.8122	2.45397	10	2180	cellular protein metabolic process	0.000126727	14	Brain	CG33303; ERp60; Hsp27; Hsp60; Hsp83; RnrL; RpL10Ab; RpL18A; RpL24; RpS7
GO:1903047	1.57966e-05	16.4405	0.616869	6	548	mitotic cell cycle process	0.000131638	14	Brain	bel; Hsp83; RpL10Ab; RpL18A; RpL24; Top2
GO:0044237	2.52549e-05	21.8283	5.23438	13	4650	cellular metabolic process	0.000189412	14	Brain	CG33303; ERp60; Hsp27; Hsp60; Hsp83; Oscp; RnrL; RpL10Ab; RpL18A; RpL24; RpS7; Top2; Vha68-2
GO:0008152	2.93454e-05	Inf	6.6471	14	5905	metabolic process	0.000199688	14	Brain	bel; CG33303; ERp60; Hsp27; Hsp60; Hsp83; Oscp; RnrL; RpL10Ab; RpL18A; RpL24; RpS7; Top2; Vha68-2
GO:0042026	3.28213e-05	344.917	0.00900539	2	8	protein refolding	0.000199688	14	Brain	Hsp27; Hsp60
GO:0000278	3.46126e-05	14.2055	0.708049	6	629	mitotic cell cycle	0.000199688	14	Brain	bel; Hsp83; RpL10Ab; RpL18A; RpL24; Top2
GO:0044238	5.33948e-05	19.7917	5.55858	13	4938	primary metabolic process	0.000286044	14	Brain	CG33303; ERp60; Hsp27; Hsp60; Hsp83; Oscp; RnrL; RpL10Ab; RpL18A; RpL24; RpS7; Top2; Vha68-2
GO:0000226	7.54453e-05	15.6455	0.485165	5	431	microtubule cytoskeleton organization	0.000374424	14	Brain	Hsp83; RpL10Ab; RpL18A; RpL24; Top2
GO:0019538	7.98772e-05	9.28206	2.97853	10	2646	protein metabolic process	0.000374424	14	Brain	CG33303; ERp60; Hsp27; Hsp60; Hsp83; RnrL; RpL10Ab; RpL18A; RpL24; RpS7
GO:0000022	9.54242e-05	42.6145	0.0923052	3	82	mitotic spindle elongation	0.0004188	14	Brain	RpL10Ab; RpL18A; RpL24
GO:0051231	0.000102533	41.5556	0.0945566	3	84	spindle elongation	0.0004188	14	Brain	RpL10Ab; RpL18A; RpL24
GO:0051298	0.000106214	41.0455	0.0956822	3	85	centrosome duplication	0.0004188	14	Brain	RpL10Ab; RpL18A; RpL24
GO:0009408	0.000113832	40.0617	0.0979336	3	87	response to heat	0.0004188	14	Brain	Hsp27; Hsp60; Hsp83
GO:0043170	0.000117264	11.448	4.82238	12	4284	macromolecule metabolic process	0.0004188	14	Brain	bel; CG33303; ERp60; Hsp27; Hsp60; Hsp83; RnrL; RpL10Ab; RpL18A; RpL24; RpS7; Top2
GO:0022402	0.000168115	10.5027	0.938812	6	834	cell cycle process	0.000573118	14	Brain	bel; Hsp83; RpL10Ab; RpL18A; RpL24; Top2
GO:0044260	0.00019088	8.88874	4.09633	11	3639	cellular macromolecule metabolic process	0.000622436	14	Brain	CG33303; ERp60; Hsp27; Hsp60; Hsp83; RnrL; RpL10Ab; RpL18A; RpL24; RpS7; Top2
GO:0007017	0.000218767	12.3448	0.607864	5	540	microtubule-based process	0.000683648	14	Brain	Hsp83; RpL10Ab; RpL18A; RpL24; Top2
GO:0006996	0.000281898	7.76277	2.05886	8	1829	organelle organization	0.000845693	14	Brain	bel; Hsp60; Hsp83; RpL10Ab; RpL18A; RpL24; Top2; Vha68-2
GO:0044249	0.000306404	7.46705	2.72638	9	2422	cellular biosynthetic process	0.000883857	14	Brain	CG33303; Hsp83; Oscp; RnrL; RpL10Ab; RpL18A; RpL24; RpS7; Top2
GO:1901576	0.00032289	7.40601	2.74439	9	2438	organic substance biosynthetic process	0.000896916	14	Brain	CG33303; Hsp83; Oscp; RnrL; RpL10Ab; RpL18A; RpL24; RpS7; Top2
GO:0009266	0.000381875	26.1967	0.147463	3	131	response to temperature stimulus	0.00100645	14	Brain	Hsp27; Hsp60; Hsp83
GO:0009058	0.00038916	7.19131	2.80968	9	2496	biosynthetic process	0.00100645	14	Brain	CG33303; Hsp83; Oscp; RnrL; RpL10Ab; RpL18A; RpL24; RpS7; Top2
GO:0007049	0.000405337	8.8258	1.10203	6	979	cell cycle	0.00101334	14	Brain	bel; Hsp83; RpL10Ab; RpL18A; RpL24; Top2
GO:0034645	0.000513998	7.01967	2.24122	8	1991	cellular macromolecule biosynthetic process	0.00123912	14	Brain	CG33303; Hsp83; RnrL; RpL10Ab; RpL18A; RpL24; RpS7; Top2
GO:0009059	0.000528691	6.9861	2.25022	8	1999	macromolecule biosynthetic process	0.00123912	14	Brain	CG33303; Hsp83; RnrL; RpL10Ab; RpL18A; RpL24; RpS7; Top2
GO:0044271	0.000549465	6.94039	2.2626	8	2010	cellular nitrogen compound biosynthetic process	0.00124879	14	Brain	Hsp83; Oscp; RnrL; RpL10Ab; RpL18A; RpL24; RpS7; Top2
GO:0071822	0.000567343	9.9333	0.746321	5	663	protein complex subunit organization	0.00125149	14	Brain	Hsp83; RpL10Ab; RpL18A; RpL24; Top2
GO:0007010	0.000620316	9.73009	0.760955	5	676	cytoskeleton organization	0.00132925	14	Brain	Hsp83; RpL10Ab; RpL18A; RpL24; Top2
GO:0071840	0.00104975	6.11834	3.18903	9	2833	cellular component organization or biogenesis	0.00218699	14	Brain	bel; Hsp60; Hsp83; RpL10Ab; RpL18A; RpL24; RpS7; Top2; Vha68-2
GO:0009987	0.0011863	Inf	8.6553	14	7689	cellular process	0.00240368	14	Brain	bel; CG33303; ERp60; Hsp27; Hsp60; Hsp83; Oscp; RnrL; RpL10Ab; RpL18A; RpL24; RpS7; Top2; Vha68-2
GO:0034641	0.00121786	5.96707	3.25094	9	2888	cellular nitrogen compound metabolic process	0.00240368	14	Brain	Hsp83; Oscp; RnrL; RpL10Ab; RpL18A; RpL24; RpS7; Top2; Vha68-2
GO:0010467	0.00139127	5.89985	2.5868	8	2298	gene expression	0.00267552	14	Brain	bel; Hsp83; RnrL; RpL10Ab; RpL18A; RpL24; RpS7; Top2
GO:1902600	0.00181278	37.4788	0.0641634	2	57	hydrogen ion transmembrane transport	0.00339896	14	Brain	Oscp; Vha68-2
GO:1902589	0.00207132	6.29252	1.49602	6	1329	single-organism organelle organization	0.00371098	14	Brain	bel; Hsp83; RpL10Ab; RpL18A; RpL24; Top2
GO:1901137	0.00207815	14.3311	0.264533	3	235	carbohydrate derivative biosynthetic process	0.00371098	14	Brain	CG33303; Oscp; RnrL
GO:0015992	0.00220973	33.776	0.0709174	2	63	proton transport	0.00385418	14	Brain	Oscp; Vha68-2
GO:0006818	0.00227954	33.2285	0.0720431	2	64	hydrogen transport	0.00388559	14	Brain	Oscp; Vha68-2
GO:0006807	0.00241513	5.29886	3.556	9	3159	nitrogen compound metabolic process	0.00402522	14	Brain	Hsp83; Oscp; RnrL; RpL10Ab; RpL18A; RpL24; RpS7; Top2; Vha68-2
GO:1901135	0.00251754	8.83643	0.610115	4	542	carbohydrate derivative metabolic process	0.00410469	14	Brain	CG33303; Oscp; RnrL; Vha68-2
GO:0043068	0.00272019	30.2819	0.0787971	2	70	positive regulation of programmed cell death	0.00434074	14	Brain	bel; RnrL
GO:0009117	0.00331586	12.0926	0.311812	3	277	nucleotide metabolic process	0.00512747	14	Brain	Oscp; RnrL; Vha68-2
GO:0010942	0.00336516	27.0768	0.0878025	2	78	positive regulation of cell death	0.00512747	14	Brain	bel; RnrL
GO:0006753	0.00341832	11.9586	0.315189	3	280	nucleoside phosphate metabolic process	0.00512747	14	Brain	Oscp; RnrL; Vha68-2
GO:0043933	0.0037607	6.31177	1.13693	5	1010	macromolecular complex subunit organization	0.00553043	14	Brain	Hsp83; RpL10Ab; RpL18A; RpL24; Top2
GO:1901564	0.0038827	5.48227	1.68964	6	1501	organonitrogen compound metabolic process	0.00560004	14	Brain	Oscp; RpL10Ab; RpL18A; RpL24; RpS7; Vha68-2
GO:0000070	0.00464883	22.8389	0.103562	2	92	mitotic sister chromatid segregation	0.00648157	14	Brain	bel; Top2
GO:1901566	0.00475564	5.94931	1.19997	5	1066	organonitrogen compound biosynthetic process	0.00648157	14	Brain	Oscp; RpL10Ab; RpL18A; RpL24; RpS7
GO:0055086	0.00476044	10.5865	0.354587	3	315	nucleobase-containing small molecule metabolic process	0.00648157	14	Brain	Oscp; RnrL; Vha68-2
GO:0016043	0.00483957	4.67029	3.11474	8	2767	cellular component organization	0.00648157	14	Brain	bel; Hsp60; Hsp83; RpL10Ab; RpL18A; RpL24; Top2; Vha68-2
GO:0006260	0.00494913	22.0968	0.106939	2	95	DNA replication	0.00651201	14	Brain	RnrL; Top2
GO:0000819	0.00536319	21.1787	0.111442	2	99	sister chromatid segregation	0.00693516	14	Brain	bel; Top2
GO:0098662	0.00557603	20.7475	0.113693	2	101	inorganic cation transmembrane transport	0.00708818	14	Brain	Oscp; Vha68-2
GO:0098655	0.0056839	20.5383	0.114819	2	102	cation transmembrane transport	0.00710488	14	Brain	Oscp; Vha68-2
GO:0098660	0.00601327	19.9353	0.118196	2	105	inorganic ion transmembrane transport	0.00739337	14	Brain	Oscp; Vha68-2
GO:0006950	0.00634907	5.52521	1.28327	5	1140	response to stress	0.00768033	14	Brain	Hsp27; Hsp60; Hsp83; RnrL; Top2
GO:0042595	0.00673641	191.046	0.00675404	1	6	behavioral response to starvation	0.00801954	14	Brain	Hsp27
GO:0009165	0.00717303	18.1563	0.129452	2	115	nucleotide biosynthetic process	0.00827657	14	Brain	Oscp; RnrL
GO:1901293	0.00717303	18.1563	0.129452	2	115	nucleoside phosphate biosynthetic process	0.00827657	14	Brain	Oscp; RnrL
GO:0000712	0.00785504	159.192	0.00787971	1	7	resolution of meiotic recombination intermediates	0.00866365	14	Brain	Top2
GO:0006265	0.00785504	159.192	0.00787971	1	7	DNA topological change	0.00866365	14	Brain	Top2
GO:0009262	0.00785504	159.192	0.00787971	1	7	deoxyribonucleotide metabolic process	0.00866365	14	Brain	RnrL
GO:0009631	0.0089725	136.44	0.00900539	1	8	cold acclimation	0.00921832	14	Brain	Hsp83
GO:0043248	0.0089725	136.44	0.00900539	1	8	proteasome assembly	0.00921832	14	Brain	Hsp83
GO:0045851	0.0089725	136.44	0.00900539	1	8	pH reduction	0.00921832	14	Brain	Vha68-2
GO:0051307	0.0089725	136.44	0.00900539	1	8	meiotic chromosome separation	0.00921832	14	Brain	Top2
GO:0051452	0.0089725	136.44	0.00900539	1	8	intracellular pH reduction	0.00921832	14	Brain	Vha68-2
GO:0044699	0.00920111	8.43887	8.49433	13	7546	single-organism process	0.00921864	14	Brain	bel; CG33303; ERp60; Hsp27; Hsp60; Hsp83; Oscp; RnrL; RpL10Ab; RpL18A; RpL24; Top2; Vha68-2
GO:0006412	0.00921864	6.01187	0.8769	4	779	translation	0.00921864	14	Brain	RpL10Ab; RpL18A; RpL24; RpS7
GO:0043401	1.59838e-06	182.426	0.0241216	3	20	steroid hormone mediated signaling pathway	9.2173e-05	1	CNS	EcR; ftz-f1; svp
GO:0048545	1.59838e-06	182.426	0.0241216	3	20	response to steroid hormone	9.2173e-05	1	CNS	EcR; ftz-f1; svp
GO:0071383	1.59838e-06	182.426	0.0241216	3	20	cellular response to steroid hormone stimulus	9.2173e-05	1	CNS	EcR; ftz-f1; svp
GO:0009755	6.25235e-06	110.661	0.0373884	3	31	hormone-mediated signaling pathway	0.000270414	1	CNS	EcR; ftz-f1; svp
GO:0007417	7.87572e-06	24.9549	0.300314	5	249	central nervous system development	0.0002725	1	CNS	EcR; ftz-f1; jing; pros; svp
GO:0071396	1.07609e-05	91.0882	0.0446249	3	37	cellular response to lipid	0.000310271	1	CNS	EcR; ftz-f1; svp
GO:0060322	3.4681e-05	28.0457	0.196591	4	163	head development	0.000775531	1	CNS	EcR; ftz-f1; jing; pros
GO:0033993	3.58627e-05	59.4712	0.0663343	3	55	response to lipid	0.000775531	1	CNS	EcR; ftz-f1; svp
GO:0071407	5.65835e-05	50.6598	0.077189	3	64	cellular response to organic cyclic compound	0.00106986	1	CNS	EcR; ftz-f1; svp
GO:0032870	6.78651e-05	47.5269	0.0820133	3	68	cellular response to hormone stimulus	0.00106986	1	CNS	EcR; ftz-f1; svp
GO:0009725	7.40193e-05	46.1007	0.0844255	3	70	response to hormone	0.00106986	1	CNS	EcR; ftz-f1; svp
GO:0040034	7.42097e-05	212.188	0.0132669	2	11	regulation of development, heterochronic	0.00106986	1	CNS	EcR; ftz-f1
GO:0048863	0.000114453	39.5641	0.0976924	3	81	stem cell differentiation	0.00146696	1	CNS	EcR; pros; svp
GO:0042063	0.000118714	39.0601	0.0988984	3	82	gliogenesis	0.00146696	1	CNS	jing; pros; svp
GO:0030522	0.000161349	136.352	0.0192973	2	16	intracellular receptor signaling pathway	0.00186089	1	CNS	EcR; ftz-f1
GO:0035073	0.000182735	127.251	0.0205033	2	17	pupariation	0.00197582	1	CNS	EcR; ftz-f1
GO:0035210	0.000229442	112.262	0.0229155	2	19	prepupal development	0.00220519	1	CNS	EcR; ftz-f1
GO:0060911	0.000229442	112.262	0.0229155	2	19	cardiac cell fate commitment	0.00220519	1	CNS	EcR; svp
GO:0010002	0.000254758	106.017	0.0241216	2	20	cardioblast differentiation	0.00221258	1	CNS	EcR; svp
GO:0030182	0.000255789	9.39571	0.999839	6	829	neuron differentiation	0.00221258	1	CNS	CG10249; EcR; ftz-f1; jing; pros; svp
GO:0007465	0.000309301	95.4	0.0265337	2	22	R7 cell fate commitment	0.00254805	1	CNS	pros; svp
GO:0048812	0.000409957	10.4735	0.688671	5	571	neuron projection morphogenesis	0.00319798	1	CNS	CG10249; EcR; ftz-f1; jing; pros
GO:0048699	0.000425165	8.4941	1.09753	6	910	generation of neurons	0.00319798	1	CNS	CG10249; EcR; ftz-f1; jing; pros; svp
GO:0014070	0.000463166	24.2028	0.15679	3	130	response to organic cyclic compound	0.00322944	1	CNS	EcR; ftz-f1; svp
GO:0031175	0.000469433	10.1535	0.709174	5	588	neuron projection development	0.00322944	1	CNS	CG10249; EcR; ftz-f1; jing; pros
GO:0007406	0.000504017	73.3491	0.0337702	2	28	negative regulation of neuroblast proliferation	0.00322944	1	CNS	EcR; pros
GO:2000178	0.000504017	73.3491	0.0337702	2	28	negative regulation of neural precursor cell proliferation	0.00322944	1	CNS	EcR; pros
GO:0007420	0.000528543	23.0996	0.164027	3	136	brain development	0.00326564	1	CNS	EcR; ftz-f1; pros
GO:0035051	0.000579212	68.0989	0.0361824	2	30	cardiocyte differentiation	0.00332502	1	CNS	EcR; svp
GO:0040011	0.000603453	9.58279	0.748975	5	621	locomotion	0.00332502	1	CNS	EcR; jing; pain; pros; svp
GO:0042330	0.000609735	12.9611	0.413685	4	343	taxis	0.00332502	1	CNS	jing; pain; pros; svp
GO:2000647	0.000618726	65.7454	0.0373884	2	31	negative regulation of stem cell proliferation	0.00332502	1	CNS	EcR; pros
GO:0042221	0.000634252	7.83573	1.18196	6	980	response to chemical	0.00332502	1	CNS	EcR; ftz-f1; jing; pain; pros; svp
GO:0048858	0.000663549	9.3744	0.764654	5	634	cell projection morphogenesis	0.00335188	1	CNS	CG10249; EcR; ftz-f1; jing; pros
GO:0010628	0.000701449	12.469	0.429364	4	356	positive regulation of gene expression	0.00335188	1	CNS	EcR; ftz-f1; jing; pros
GO:0032990	0.000702724	9.25039	0.774302	5	642	cell part morphogenesis	0.00335188	1	CNS	CG10249; EcR; ftz-f1; jing; pros
GO:0022008	0.000716877	6.7848	1.71987	7	1426	neurogenesis	0.00335188	1	CNS	CG10249; CG1092; EcR; ftz-f1; jing; pros; svp
GO:0007419	0.000835359	56.0543	0.0434188	2	36	ventral cord development	0.0036033	1	CNS	pros; svp
GO:0016322	0.000882479	54.4484	0.0446249	2	37	neuron remodeling	0.0036033	1	CNS	EcR; ftz-f1
GO:0035075	0.000882479	54.4484	0.0446249	2	37	response to ecdysone	0.0036033	1	CNS	EcR; ftz-f1
GO:0036314	0.000882479	54.4484	0.0446249	2	37	response to sterol	0.0036033	1	CNS	EcR; ftz-f1
GO:1901654	0.000882479	54.4484	0.0446249	2	37	response to ketone	0.0036033	1	CNS	EcR; ftz-f1
GO:0071495	0.000895617	19.1594	0.196591	3	163	cellular response to endogenous stimulus	0.0036033	1	CNS	EcR; ftz-f1; svp
GO:0010001	0.000980491	51.4969	0.0470371	2	39	glial cell differentiation	0.00376944	1	CNS	pros; svp
GO:0042551	0.000980491	51.4969	0.0470371	2	39	neuron maturation	0.00376944	1	CNS	EcR; ftz-f1
GO:1902692	0.00103138	50.1377	0.0482431	2	40	regulation of neuroblast proliferation	0.00387887	1	CNS	EcR; pros
GO:2000177	0.00108351	48.8481	0.0494492	2	41	regulation of neural precursor cell proliferation	0.00398825	1	CNS	EcR; pros
GO:0048666	0.00115374	8.23558	0.863552	5	716	neuron development	0.00415826	1	CNS	CG10249; EcR; ftz-f1; jing; pros
GO:0030030	0.00119056	8.17458	0.869583	5	721	cell projection organization	0.00420342	1	CNS	CG10249; EcR; ftz-f1; jing; pros
GO:0048729	0.00126686	8.0551	0.881643	5	731	tissue morphogenesis	0.00438335	1	CNS	EcR; ftz-f1; jing; pros; svp
GO:0014016	0.0013045	44.2898	0.0542735	2	45	neuroblast differentiation	0.00442508	1	CNS	pros; svp
GO:0072091	0.00136285	43.2797	0.0554796	2	46	regulation of stem cell proliferation	0.0045341	1	CNS	EcR; pros
GO:0009612	0.00148324	41.3913	0.0578918	2	48	response to mechanical stimulus	0.00484153	1	CNS	CG1732; pain
GO:0007443	0.00154528	40.5074	0.0590979	2	49	Malpighian tubule morphogenesis	0.00486062	1	CNS	EcR; svp
GO:0061333	0.00154528	40.5074	0.0590979	2	49	renal tubule morphogenesis	0.00486062	1	CNS	EcR; svp
GO:0046530	0.00161613	15.514	0.241216	3	200	photoreceptor cell differentiation	0.00499269	1	CNS	EcR; pros; svp
GO:0007399	0.00174181	5.73647	1.99124	7	1651	nervous system development	0.00520244	1	CNS	CG10249; CG1092; EcR; ftz-f1; jing; pros; svp
GO:0000902	0.00174417	7.46282	0.946772	5	785	cell morphogenesis	0.00520244	1	CNS	CG10249; EcR; ftz-f1; jing; pros
GO:0009719	0.00185867	14.7524	0.253277	3	210	response to endogenous stimulus	0.00540286	1	CNS	EcR; ftz-f1; svp
GO:0048619	0.00187382	36.5976	0.0651282	2	54	embryonic hindgut morphogenesis	0.00540286	1	CNS	EcR; svp
GO:0001752	0.00194318	35.9042	0.0663343	2	55	compound eye photoreceptor fate commitment	0.00551098	1	CNS	pros; svp
GO:0042706	0.00201375	35.2365	0.0675404	2	56	eye photoreceptor cell fate commitment	0.0055841	1	CNS	pros; svp
GO:0045944	0.00206833	14.1942	0.262925	3	218	positive regulation of transcription from RNA polymerase II promoter	0.0055841	1	CNS	EcR; ftz-f1; jing
GO:0048813	0.00206833	14.1942	0.262925	3	218	dendrite morphogenesis	0.0055841	1	CNS	EcR; ftz-f1; pros
GO:0006357	0.00212991	9.12605	0.578918	4	480	regulation of transcription from RNA polymerase II promoter	0.0055841	1	CNS	EcR; ftz-f1; jing; pros
GO:0045466	0.0021585	33.9725	0.0699526	2	58	R7 cell differentiation	0.0055841	1	CNS	pros; svp
GO:0048667	0.00216263	9.08634	0.58133	4	482	cell morphogenesis involved in neuron differentiation	0.0055841	1	CNS	EcR; ftz-f1; jing; pros
GO:0071310	0.0022066	13.8659	0.268956	3	223	cellular response to organic substance	0.00559405	1	CNS	EcR; ftz-f1; svp
GO:0050768	0.00223268	33.3738	0.0711586	2	59	negative regulation of neurogenesis	0.00559405	1	CNS	EcR; pros
GO:0016358	0.00226349	13.7387	0.271368	3	225	dendrite development	0.00559405	1	CNS	EcR; ftz-f1; pros
GO:0046552	0.00230807	32.7958	0.0723647	2	60	photoreceptor cell fate commitment	0.00562388	1	CNS	pros; svp
GO:0007442	0.00254138	31.1753	0.075983	2	63	hindgut morphogenesis	0.00602273	1	CNS	EcR; svp
GO:0061525	0.00254138	31.1753	0.075983	2	63	hindgut development	0.00602273	1	CNS	EcR; svp
GO:0006366	0.00279363	8.44161	0.623543	4	517	transcription from RNA polymerase II promoter	0.00653106	1	CNS	EcR; ftz-f1; jing; pros
GO:0061326	0.002954	28.8019	0.0820133	2	68	renal tubule development	0.00672424	1	CNS	EcR; svp
GO:0072002	0.002954	28.8019	0.0820133	2	68	Malpighian tubule development	0.00672424	1	CNS	EcR; svp
GO:0000904	0.0030158	8.25677	0.63681	4	528	cell morphogenesis involved in differentiation	0.0067427	1	CNS	EcR; ftz-f1; jing; pros
GO:0010721	0.00304006	28.3697	0.0832194	2	69	negative regulation of cell development	0.0067427	1	CNS	EcR; pros
GO:0010604	0.00312073	8.17529	0.64284	4	533	positive regulation of macromolecule metabolic process	0.006834	1	CNS	EcR; ftz-f1; jing; pros
GO:0032989	0.00335189	6.36298	1.09753	5	910	cellular component morphogenesis	0.00724847	1	CNS	CG10249; EcR; ftz-f1; jing; pros
GO:0009887	0.00340048	6.34031	1.10115	5	913	organ morphogenesis	0.00726275	1	CNS	EcR; ftz-f1; jing; pros; svp
GO:0048546	0.00348793	26.3889	0.0892498	2	74	digestive tract morphogenesis	0.00727003	1	CNS	EcR; svp
GO:0048663	0.00348793	26.3889	0.0892498	2	74	neuron fate commitment	0.00727003	1	CNS	pros; svp
GO:0001655	0.00367522	25.6715	0.091662	2	76	urogenital system development	0.00748016	1	CNS	EcR; svp
GO:0072001	0.00367522	25.6715	0.091662	2	76	renal system development	0.00748016	1	CNS	EcR; svp
GO:0016319	0.00396483	24.6653	0.0952802	2	79	mushroom body development	0.00764145	1	CNS	EcR; ftz-f1
GO:0060562	0.00400225	7.60301	0.688671	4	571	epithelial tube morphogenesis	0.00764145	1	CNS	EcR; ftz-f1; jing; svp
GO:0006355	0.00402471	6.07945	1.14457	5	949	regulation of transcription, DNA-templated	0.00764145	1	CNS	EcR; ftz-f1; jing; pros; svp
GO:1903506	0.00402471	6.07945	1.14457	5	949	regulation of nucleic acid-templated transcription	0.00764145	1	CNS	EcR; ftz-f1; jing; pros; svp
GO:2001141	0.00402471	6.07945	1.14457	5	949	regulation of RNA biosynthetic process	0.00764145	1	CNS	EcR; ftz-f1; jing; pros; svp
GO:0008049	0.00406366	24.3471	0.0964863	2	80	male courtship behavior	0.00764145	1	CNS	pain; pros
GO:0008285	0.00406366	24.3471	0.0964863	2	80	negative regulation of cell proliferation	0.00764145	1	CNS	EcR; pros
GO:0009605	0.00415521	6.03102	1.15301	5	956	response to external stimulus	0.00772958	1	CNS	CG1732; jing; pain; pros; svp
GO:0007405	0.00468064	22.5971	0.103723	2	86	neuroblast proliferation	0.0084513	1	CNS	EcR; pros
GO:0035071	0.00478744	22.3294	0.104929	2	87	salivary gland cell autophagic cell death	0.0084513	1	CNS	EcR; ftz-f1
GO:0048102	0.00478744	22.3294	0.104929	2	87	autophagic cell death	0.0084513	1	CNS	EcR; ftz-f1
GO:0060179	0.00478744	22.3294	0.104929	2	87	male mating behavior	0.0084513	1	CNS	pain; pros
GO:0061351	0.00478744	22.3294	0.104929	2	87	neural precursor cell proliferation	0.0084513	1	CNS	EcR; pros
GO:0035239	0.00489553	7.16485	0.728471	4	604	tube morphogenesis	0.00855481	1	CNS	EcR; ftz-f1; jing; svp
GO:0070887	0.00500343	10.2771	0.359411	3	298	cellular response to chemical stimulus	0.00865593	1	CNS	EcR; ftz-f1; svp
GO:0006351	0.00513497	5.71722	1.2109	5	1004	transcription, DNA-templated	0.00870931	1	CNS	EcR; ftz-f1; jing; pros; svp
GO:0097659	0.00513497	5.71722	1.2109	5	1004	nucleic acid-templated transcription	0.00870931	1	CNS	EcR; ftz-f1; jing; pros; svp
GO:0032774	0.00520131	5.6986	1.21452	5	1007	RNA biosynthetic process	0.00873618	1	CNS	EcR; ftz-f1; jing; pros; svp
GO:0002165	0.00531259	6.99319	0.745357	4	618	instar larval or pupal development	0.00878989	1	CNS	CG9503; EcR; ftz-f1; jing
GO:0045893	0.00543652	9.96546	0.370266	3	307	positive regulation of transcription, DNA-templated	0.00878989	1	CNS	EcR; ftz-f1; jing
GO:1902680	0.00543652	9.96546	0.370266	3	307	positive regulation of RNA biosynthetic process	0.00878989	1	CNS	EcR; ftz-f1; jing
GO:1903508	0.00543652	9.96546	0.370266	3	307	positive regulation of nucleic acid-templated transcription	0.00878989	1	CNS	EcR; ftz-f1; jing
GO:0051252	0.00563603	5.58325	1.23744	5	1026	regulation of RNA metabolic process	0.00882388	1	CNS	EcR; ftz-f1; jing; pros; svp
GO:0051254	0.00589178	9.67173	0.381121	3	316	positive regulation of RNA metabolic process	0.00882388	1	CNS	EcR; ftz-f1; jing
GO:0009893	0.00594951	6.76111	0.769478	4	638	positive regulation of metabolic process	0.00882388	1	CNS	EcR; ftz-f1; jing; pros
GO:0007468	0.00601683	221.75	0.00603039	1	5	regulation of rhodopsin gene expression	0.00882388	1	CNS	EcR
GO:0016048	0.00601683	221.75	0.00603039	1	5	detection of temperature stimulus	0.00882388	1	CNS	pain
GO:0033555	0.00601683	221.75	0.00603039	1	5	multicellular organismal response to stress	0.00882388	1	CNS	pain
GO:0035074	0.00601683	221.75	0.00603039	1	5	pupation	0.00882388	1	CNS	ftz-f1
GO:0050951	0.00601683	221.75	0.00603039	1	5	sensory perception of temperature stimulus	0.00882388	1	CNS	pain
GO:0050961	0.00601683	221.75	0.00603039	1	5	detection of temperature stimulus involved in sensory perception	0.00882388	1	CNS	pain
GO:0007619	0.00603617	19.7532	0.118196	2	98	courtship behavior	0.00882388	1	CNS	pain; pros
GO:0051961	0.00603617	19.7532	0.118196	2	98	negative regulation of nervous system development	0.00882388	1	CNS	EcR; pros
GO:2000112	0.00612146	5.46638	1.26156	5	1046	regulation of cellular macromolecule biosynthetic process	0.00882388	1	CNS	EcR; ftz-f1; jing; pros; svp
GO:0072089	0.00615634	19.548	0.119402	2	99	stem cell proliferation	0.00882388	1	CNS	EcR; pros
GO:0010556	0.00617161	5.45494	1.26397	5	1048	regulation of macromolecule biosynthetic process	0.00882388	1	CNS	EcR; ftz-f1; jing; pros; svp
GO:0045596	0.00627762	19.3469	0.120608	2	100	negative regulation of cell differentiation	0.00889055	1	CNS	EcR; pros
GO:0009790	0.00632103	6.63961	0.782745	4	649	embryo development	0.00889055	1	CNS	EcR; ftz-f1; jing; svp
GO:0007422	0.00639999	19.15	0.121814	2	101	peripheral nervous system development	0.00892901	1	CNS	EcR; pros
GO:0035218	0.006648	18.7677	0.124226	2	103	leg disc development	0.00904694	1	CNS	ftz-f1; jing
GO:0007507	0.00677364	18.5822	0.125432	2	104	heart development	0.00904694	1	CNS	EcR; svp
GO:0072358	0.00677364	18.5822	0.125432	2	104	cardiovascular system development	0.00904694	1	CNS	EcR; svp
GO:0072359	0.00677364	18.5822	0.125432	2	104	circulatory system development	0.00904694	1	CNS	EcR; svp
GO:0008283	0.00681335	9.16061	0.401624	3	333	cell proliferation	0.00904694	1	CNS	EcR; pros; svp
GO:0010557	0.0068701	9.13218	0.40283	3	334	positive regulation of macromolecule biosynthetic process	0.00904694	1	CNS	EcR; ftz-f1; jing
GO:0019219	0.00696	5.28844	1.30015	5	1078	regulation of nucleobase-containing compound metabolic process	0.00904694	1	CNS	EcR; ftz-f1; jing; pros; svp
GO:0007503	0.00721613	177.386	0.00723647	1	6	fat body development	0.00904694	1	CNS	svp
GO:0010771	0.00721613	177.386	0.00723647	1	6	negative regulation of cell morphogenesis involved in differentiation	0.00904694	1	CNS	pros
GO:0035193	0.00721613	177.386	0.00723647	1	6	larval central nervous system remodeling	0.00904694	1	CNS	EcR
GO:0048052	0.00721613	177.386	0.00723647	1	6	R1/R6 cell differentiation	0.00904694	1	CNS	svp
GO:0060612	0.00721613	177.386	0.00723647	1	6	adipose tissue development	0.00904694	1	CNS	svp
GO:0071260	0.00721613	177.386	0.00723647	1	6	cellular response to mechanical stimulus	0.00904694	1	CNS	CG1732
GO:0045935	0.00721663	8.96513	0.410067	3	340	positive regulation of nucleobase-containing compound metabolic process	0.00904694	1	CNS	EcR; ftz-f1; jing
GO:0048565	0.00755022	17.5413	0.132669	2	110	digestive tract development	0.00925047	1	CNS	EcR; svp
GO:0055123	0.00755022	17.5413	0.132669	2	110	digestive system development	0.00925047	1	CNS	EcR; svp
GO:0031326	0.00761168	5.16697	1.32789	5	1101	regulation of cellular biosynthetic process	0.00925047	1	CNS	EcR; ftz-f1; jing; pros; svp
GO:0009889	0.00764097	5.1618	1.3291	5	1102	regulation of biosynthetic process	0.00925047	1	CNS	EcR; ftz-f1; jing; pros; svp
GO:0009791	0.00764634	6.26939	0.826164	4	685	post-embryonic development	0.00925047	1	CNS	CG9503; EcR; ftz-f1; jing
GO:0007610	0.00784406	6.22104	0.832194	4	690	behavior	0.00927157	1	CNS	EcR; ftz-f1; pain; pros
GO:0097305	0.0080894	16.9093	0.137493	2	114	response to alcohol	0.00927157	1	CNS	EcR; ftz-f1
GO:0015800	0.00841409	147.81	0.00844255	1	7	acidic amino acid transport	0.00927157	1	CNS	CG1732
GO:0019233	0.00841409	147.81	0.00844255	1	7	sensory perception of pain	0.00927157	1	CNS	pain
GO:0021675	0.00841409	147.81	0.00844255	1	7	nerve development	0.00927157	1	CNS	pros
GO:0044110	0.00841409	147.81	0.00844255	1	7	growth involved in symbiotic interaction	0.00927157	1	CNS	EcR
GO:0044116	0.00841409	147.81	0.00844255	1	7	growth of symbiont involved in interaction with host	0.00927157	1	CNS	EcR
GO:0044117	0.00841409	147.81	0.00844255	1	7	growth of symbiont in host	0.00927157	1	CNS	EcR
GO:0044126	0.00841409	147.81	0.00844255	1	7	regulation of growth of symbiont in host	0.00927157	1	CNS	EcR
GO:0044130	0.00841409	147.81	0.00844255	1	7	negative regulation of growth of symbiont in host	0.00927157	1	CNS	EcR
GO:0044144	0.00841409	147.81	0.00844255	1	7	modulation of growth of symbiont involved in interaction with host	0.00927157	1	CNS	EcR
GO:0044146	0.00841409	147.81	0.00844255	1	7	negative regulation of growth of symbiont involved in interaction with host	0.00927157	1	CNS	EcR
GO:0048060	0.00841409	147.81	0.00844255	1	7	negative gravitaxis	0.00927157	1	CNS	pain
GO:0061448	0.00841409	147.81	0.00844255	1	7	connective tissue development	0.00927157	1	CNS	svp
GO:0002009	0.00888433	5.98952	0.862346	4	715	morphogenesis of an epithelium	0.00972778	1	CNS	EcR; ftz-f1; jing; svp
GO:0050896	0.00907626	3.93642	3.38064	8	2803	response to stimulus	0.00977227	1	CNS	CG1732; EcR; ftz-f1; jing; pain; pros; RhoGEF3; svp
GO:0045892	0.00917375	8.18886	0.447455	3	371	negative regulation of transcription, DNA-templated	0.00977227	1	CNS	EcR; jing; pros
GO:1902679	0.00917375	8.18886	0.447455	3	371	negative regulation of RNA biosynthetic process	0.00977227	1	CNS	EcR; jing; pros
GO:1903507	0.00917375	8.18886	0.447455	3	371	negative regulation of nucleic acid-templated transcription	0.00977227	1	CNS	EcR; jing; pros
GO:0034654	0.009312	4.90087	1.39302	5	1155	nucleobase-containing compound biosynthetic process	0.00977227	1	CNS	EcR; ftz-f1; jing; pros; svp
GO:0048468	0.00956336	4.34019	2.00209	6	1660	cell development	0.00977227	1	CNS	CG10249; EcR; ftz-f1; jing; pros; svp
GO:0007561	0.00961069	126.684	0.00964863	1	8	imaginal disc eversion	0.00977227	1	CNS	EcR
GO:0010977	0.00961069	126.684	0.00964863	1	8	negative regulation of neuron projection development	0.00977227	1	CNS	pros
GO:0045938	0.00961069	126.684	0.00964863	1	8	positive regulation of circadian sleep/wake cycle, sleep	0.00977227	1	CNS	EcR
GO:0048738	0.00961069	126.684	0.00964863	1	8	cardiac muscle tissue development	0.00977227	1	CNS	EcR
GO:0009891	0.00965504	8.03133	0.455898	3	378	positive regulation of biosynthetic process	0.00977227	1	CNS	EcR; ftz-f1; jing
GO:0031328	0.00965504	8.03133	0.455898	3	378	positive regulation of cellular biosynthetic process	0.00977227	1	CNS	EcR; ftz-f1; jing
GO:0007298	0.00965929	15.3834	0.15076	2	125	border follicle cell migration	0.00977227	1	CNS	EcR; jing
GO:0051173	0.00979525	7.9874	0.45831	3	380	positive regulation of nitrogen compound metabolic process	0.0098522	1	CNS	EcR; ftz-f1; jing
GO:0042048	0.00995828	15.1348	0.153172	2	127	olfactory behavior	0.00995828	1	CNS	ftz-f1; pain
GO:0035065	0.000159095	140.966	0.0192973	2	10	regulation of histone acetylation	0.00201751	2	CNS	Gug; pr-set7
GO:0048015	0.000159095	140.966	0.0192973	2	10	phosphatidylinositol-mediated signaling	0.00201751	2	CNS	fwd; Pi3K68D
GO:1901983	0.000159095	140.966	0.0192973	2	10	regulation of protein acetylation	0.00201751	2	CNS	Gug; pr-set7
GO:2000756	0.000159095	140.966	0.0192973	2	10	regulation of peptidyl-lysine acetylation	0.00201751	2	CNS	Gug; pr-set7
GO:0006974	0.000209613	11.0399	0.567339	5	294	cellular response to DNA damage stimulus	0.00201751	2	CNS	CG6812; mu2; phr; Pi3K68D; pr-set7
GO:0048017	0.000232789	112.755	0.0231567	2	12	inositol lipid-mediated signaling	0.00201751	2	CNS	fwd; Pi3K68D
GO:0007525	0.000470575	22.8868	0.154378	3	80	somatic muscle development	0.00311054	2	CNS	CG13366; Gug; lola
GO:0046854	0.000535845	70.4375	0.0347351	2	18	phosphatidylinositol phosphorylation	0.00311054	2	CNS	fwd; Pi3K68D
GO:0045879	0.00059818	66.2888	0.0366648	2	19	negative regulation of smoothened signaling pathway	0.00311054	2	CNS	Gug; sbb
GO:0046834	0.00059818	66.2888	0.0366648	2	19	lipid phosphorylation	0.00311054	2	CNS	fwd; Pi3K68D
GO:0050896	0.000736807	4.07621	5.40902	13	2803	response to stimulus	0.00348309	2	CNS	AP-1sigma; CG6812; DIP1; fwd; Gug; lola; mu2; phr; Pi3K68D; pr-set7; Rlip; sbb; Sdc
GO:0031056	0.000959812	51.2025	0.0463134	2	24	regulation of histone modification	0.00415919	2	CNS	Gug; pr-set7
GO:0044763	0.00104639	4.41767	11.1133	19	5759	single-organism cellular process	0.00418558	2	CNS	AP-1sigma; CG12773; CG13366; CG6812; fwd; Gug; hoe1; lola; Mct1; Mes-4; mnd; mu2; phr; Pi3K68D; pr-set7; Rlip; sbb; Sdc; ytr
GO:0007526	0.00130835	43.3112	0.0540323	2	28	larval somatic muscle development	0.00439699	2	CNS	Gug; lola
GO:0007411	0.00132752	9.69084	0.49208	4	255	axon guidance	0.00439699	2	CNS	AP-1sigma; lola; sbb; Sdc
GO:0042461	0.00135292	15.6901	0.221918	3	115	photoreceptor cell development	0.00439699	2	CNS	AP-1sigma; lola; sbb
GO:0097485	0.00148776	9.38533	0.507518	4	263	neuron projection guidance	0.00455079	2	CNS	AP-1sigma; lola; sbb; Sdc
GO:0055085	0.00176704	6.76174	0.906971	5	470	transmembrane transport	0.0047237	2	CNS	CG12773; CG6812; hoe1; Mct1; mnd
GO:0006935	0.00177634	8.92721	0.532604	4	276	chemotaxis	0.0047237	2	CNS	AP-1sigma; lola; sbb; Sdc
GO:0008589	0.00181681	36.3109	0.063681	2	33	regulation of smoothened signaling pathway	0.0047237	2	CNS	Gug; sbb
GO:0006281	0.00209745	13.3937	0.258583	3	134	DNA repair	0.00519368	2	CNS	CG6812; mu2; phr
GO:0003333	0.00228089	32.1506	0.0713999	2	37	amino acid transmembrane transport	0.0053912	2	CNS	CG12773; mnd
GO:1903825	0.00240478	31.2551	0.0733296	2	38	organic acid transmembrane transport	0.00543689	2	CNS	CG12773; mnd
GO:0098656	0.00279512	28.8438	0.0791188	2	41	anion transmembrane transport	0.0060561	2	CNS	CG12773; mnd
GO:0007409	0.00300761	7.68127	0.615583	4	319	axonogenesis	0.00625582	2	CNS	AP-1sigma; lola; sbb; Sdc
GO:0061564	0.00339796	7.41534	0.63681	4	330	axon development	0.006563	2	CNS	AP-1sigma; lola; sbb; Sdc
GO:0044710	0.00340771	3.56694	4.01576	10	2081	single-organism metabolic process	0.006563	2	CNS	CG6812; Cyp6t1; Ero1L; fwd; Gug; mu2; phr; Pi3K68D; pr-set7; Sdc
GO:0042330	0.00390255	7.1233	0.661896	4	343	taxis	0.00724759	2	CNS	AP-1sigma; lola; sbb; Sdc
GO:0006865	0.00413169	23.4186	0.0964863	2	50	amino acid transport	0.00729095	2	CNS	CG12773; mnd
GO:0044699	0.00420632	4.54698	14.5617	21	7546	single-organism process	0.00729095	2	CNS	AP-1sigma; CG12773; CG13366; CG6812; Cyp6t1; Ero1L; fwd; Gug; hoe1; lola; Mct1; Mes-4; mnd; mu2; phr; Pi3K68D; pr-set7; Rlip; sbb; Sdc; ytr
GO:0033554	0.00460173	5.35918	1.13082	5	586	cellular response to stress	0.00748143	2	CNS	CG6812; mu2; phr; Pi3K68D; pr-set7
GO:0051716	0.00460396	3.55382	3.47737	9	1802	cellular response to stimulus	0.00748143	2	CNS	CG6812; fwd; Gug; mu2; phr; Pi3K68D; pr-set7; Rlip; sbb
GO:0007224	0.00480386	21.6101	0.104205	2	54	smoothened signaling pathway	0.00756972	2	CNS	Gug; sbb
GO:0002121	0.00571019	19.7065	0.113854	2	59	inter-male aggressive behavior	0.00861932	2	CNS	Gug; lola
GO:0007472	0.00598689	6.28198	0.746804	4	387	wing disc morphogenesis	0.00861932	2	CNS	CG13366; Gug; lola; sbb
GO:0002118	0.00628872	18.7167	0.119643	2	62	aggressive behavior	0.00861932	2	CNS	Gug; lola
GO:0046530	0.00646428	8.85859	0.385945	3	200	photoreceptor cell differentiation	0.00861932	2	CNS	AP-1sigma; lola; sbb
GO:0009887	0.00658219	4.22859	1.76184	6	913	organ morphogenesis	0.00861932	2	CNS	AP-1sigma; CG13366; fwd; Gug; lola; sbb
GO:0030258	0.00689295	17.8211	0.125432	2	65	lipid modification	0.00861932	2	CNS	fwd; Pi3K68D
GO:0010605	0.00703267	4.81706	1.25046	5	648	negative regulation of macromolecule metabolic process	0.00861932	2	CNS	Gug; Mes-4; pr-set7; sbb; Sdc
GO:0046488	0.00710002	17.5412	0.127362	2	66	phosphatidylinositol metabolic process	0.00861932	2	CNS	fwd; Pi3K68D
GO:0015849	0.0073099	17.2699	0.129292	2	67	organic acid transport	0.00861932	2	CNS	CG12773; mnd
GO:0046942	0.0073099	17.2699	0.129292	2	67	carboxylic acid transport	0.00861932	2	CNS	CG12773; mnd
GO:0016573	0.00752258	17.0069	0.131221	2	68	histone acetylation	0.00861932	2	CNS	Gug; pr-set7
GO:1903308	0.00752258	17.0069	0.131221	2	68	regulation of chromatin modification	0.00861932	2	CNS	Gug; pr-set7
GO:0006475	0.0079563	16.504	0.135081	2	70	internal protein amino acid acetylation	0.00861932	2	CNS	Gug; pr-set7
GO:0018393	0.0079563	16.504	0.135081	2	70	internal peptidyl-lysine acetylation	0.00861932	2	CNS	Gug; pr-set7
GO:0018394	0.0079563	16.504	0.135081	2	70	peptidyl-lysine acetylation	0.00861932	2	CNS	Gug; pr-set7
GO:0006473	0.00817732	16.2635	0.137011	2	71	protein acetylation	0.00867797	2	CNS	Gug; pr-set7
GO:1902275	0.0084011	16.0299	0.13894	2	72	regulation of chromatin organization	0.00873714	2	CNS	Gug; pr-set7
GO:0009892	0.00885547	4.54063	1.32186	5	685	negative regulation of metabolic process	0.00902911	2	CNS	Gug; Mes-4; pr-set7; sbb; Sdc
GO:2000637	0.009613	134.88	0.00964863	1	5	positive regulation of gene silencing by miRNA	0.009613	2	CNS	Sdc
GO:0007400	1.66607e-06	186.015	0.0247648	3	28	neuroblast fate determination	0.000118329	3	CNS	CycE; mira; stau
GO:0014017	2.51764e-06	160.306	0.0283026	3	32	neuroblast fate commitment	0.000118329	3	CNS	CycE; mira; stau
GO:0048867	2.51764e-06	160.306	0.0283026	3	32	stem cell fate determination	0.000118329	3	CNS	CycE; mira; stau
GO:0051301	4.11595e-06	32.5699	0.278604	5	315	cell division	0.000136224	3	CNS	Bub1; CycE; mira; nuf; stau
GO:0048865	4.99562e-06	125.564	0.0353783	3	40	stem cell fate commitment	0.000136224	3	CNS	CycE; mira; stau
GO:0001709	5.79678e-06	49.0829	0.130015	4	147	cell fate determination	0.000136224	3	CNS	CycE; mira; nuf; stau
GO:0014016	7.15757e-06	110.571	0.0398006	3	45	neuroblast differentiation	0.000144174	3	CNS	CycE; mira; stau
GO:0045165	3.25928e-05	20.8753	0.426309	5	482	cell fate commitment	0.000574449	3	CNS	CycE; mira; nuf; sca; stau
GO:0048863	4.22935e-05	59.3654	0.0716411	3	81	stem cell differentiation	0.000662598	3	CNS	CycE; mira; stau
GO:0045167	6.43461e-05	229.889	0.0123824	2	14	asymmetric protein localization involved in cell fate determination	0.000759962	3	CNS	mira; stau
GO:0008356	7.47768e-05	48.675	0.0866769	3	98	asymmetric cell division	0.000759962	3	CNS	CycE; mira; stau
GO:0051352	8.47702e-05	197.016	0.0141513	2	16	negative regulation of ligase activity	0.000759962	3	CNS	Bub1; CycE
GO:0051436	8.47702e-05	197.016	0.0141513	2	16	negative regulation of ubiquitin-protein ligase activity involved in mitotic cell cycle	0.000759962	3	CNS	Bub1; CycE
GO:0051439	8.47702e-05	197.016	0.0141513	2	16	regulation of ubiquitin-protein ligase activity involved in mitotic cell cycle	0.000759962	3	CNS	Bub1; CycE
GO:0051444	8.47702e-05	197.016	0.0141513	2	16	negative regulation of ubiquitin-protein transferase activity	0.000759962	3	CNS	Bub1; CycE
GO:0033043	8.62368e-05	24.0833	0.258262	4	292	regulation of organelle organization	0.000759962	3	CNS	Bsg25A; Bub1; CycE; stau
GO:0031397	0.000107978	172.361	0.0159202	2	18	negative regulation of protein ubiquitination	0.000802563	3	CNS	Bub1; CycE
GO:0051340	0.000120623	162.209	0.0168047	2	19	regulation of ligase activity	0.000802563	3	CNS	Bub1; CycE
GO:1903321	0.000120623	162.209	0.0168047	2	19	negative regulation of protein modification by small protein conjugation or removal	0.000802563	3	CNS	Bub1; CycE
GO:0032435	0.000133961	153.185	0.0176892	2	20	negative regulation of proteasomal ubiquitin-dependent protein catabolic process	0.000802563	3	CNS	Bub1; CycE
GO:1901799	0.000133961	153.185	0.0176892	2	20	negative regulation of proteasomal protein catabolic process	0.000802563	3	CNS	Bub1; CycE
GO:0030162	0.000143475	38.7826	0.107904	3	122	regulation of proteolysis	0.000802563	3	CNS	Bub1; CycE; mira
GO:0051128	0.000146528	14.9758	0.583742	5	660	regulation of cellular component organization	0.000802563	3	CNS	Bsg25A; Bub1; CycE; mira; stau
GO:0042177	0.00014799	145.111	0.0185736	2	21	negative regulation of protein catabolic process	0.000802563	3	CNS	Bub1; CycE
GO:1903051	0.00014799	145.111	0.0185736	2	21	negative regulation of proteolysis involved in cellular protein catabolic process	0.000802563	3	CNS	Bub1; CycE
GO:1903363	0.00014799	145.111	0.0185736	2	21	negative regulation of cellular protein catabolic process	0.000802563	3	CNS	Bub1; CycE
GO:0051438	0.000162711	137.844	0.0194581	2	22	regulation of ubiquitin-protein transferase activity	0.000849712	3	CNS	Bub1; CycE
GO:0006996	0.000281304	10.185	1.61767	7	1829	organelle organization	0.00130413	3	CNS	Bsg25A; Bub1; CycE; nuf; Prosap; sca; stau
GO:0007317	0.000285012	102.049	0.0256493	2	29	regulation of pole plasm oskar mRNA localization	0.00130413	3	CNS	mira; stau
GO:0060281	0.000305223	98.3968	0.0265337	2	30	regulation of oocyte development	0.00130413	3	CNS	mira; stau
GO:1902875	0.000305223	98.3968	0.0265337	2	30	regulation of embryonic pattern specification	0.00130413	3	CNS	mira; stau
GO:1903429	0.000305223	98.3968	0.0265337	2	30	regulation of cell maturation	0.00130413	3	CNS	mira; stau
GO:1904580	0.000305223	98.3968	0.0265337	2	30	regulation of intracellular mRNA localization	0.00130413	3	CNS	mira; stau
GO:0060341	0.000375376	27.6958	0.149473	3	169	regulation of cellular localization	0.00155671	3	CNS	Glut1; mira; stau
GO:0051246	0.00048329	15.1031	0.404197	4	457	regulation of protein metabolic process	0.0018285	3	CNS	Bub1; CycE; mira; stau
GO:0031396	0.000491367	76.4815	0.0336094	2	38	regulation of protein ubiquitination	0.0018285	3	CNS	Bub1; CycE
GO:0016043	0.000509352	9.34348	2.44729	8	2767	cellular component organization	0.0018285	3	CNS	Bsg25A; Bub1; CycE; mira; nuf; Prosap; sca; stau
GO:0055059	0.000517678	74.4084	0.0344938	2	39	asymmetric neuroblast division	0.0018285	3	CNS	mira; stau
GO:0031145	0.000544661	72.4444	0.0353783	2	40	anaphase-promoting complex-dependent proteasomal ubiquitin-dependent protein catabolic process	0.0018285	3	CNS	Bub1; CycE
GO:0036445	0.000544661	72.4444	0.0353783	2	40	neuronal stem cell division	0.0018285	3	CNS	mira; stau
GO:0055057	0.000544661	72.4444	0.0353783	2	40	neuroblast division	0.0018285	3	CNS	mira; stau
GO:1903320	0.000544661	72.4444	0.0353783	2	40	regulation of protein modification by small protein conjugation or removal	0.0018285	3	CNS	Bub1; CycE
GO:0031330	0.000572316	70.5812	0.0362628	2	41	negative regulation of cellular catabolic process	0.00183401	3	CNS	Bub1; CycE
GO:0032434	0.000572316	70.5812	0.0362628	2	41	regulation of proteasomal ubiquitin-dependent protein catabolic process	0.00183401	3	CNS	Bub1; CycE
GO:0071840	0.0006045	9.06289	2.50567	8	2833	cellular component organization or biogenesis	0.00184956	3	CNS	Bsg25A; Bub1; CycE; mira; nuf; Prosap; sca; stau
GO:0008105	0.000629637	67.1274	0.0380317	2	43	asymmetric protein localization	0.00184956	3	CNS	mira; stau
GO:0009895	0.000629637	67.1274	0.0380317	2	43	negative regulation of catabolic process	0.00184956	3	CNS	Bub1; CycE
GO:0061136	0.000629637	67.1274	0.0380317	2	43	regulation of proteasomal protein catabolic process	0.00184956	3	CNS	Bub1; CycE
GO:0051348	0.000720633	62.5354	0.0406851	2	46	negative regulation of transferase activity	0.00207366	3	CNS	Bub1; CycE
GO:1903050	0.000752298	61.1407	0.0415695	2	47	regulation of proteolysis involved in cellular protein catabolic process	0.00207988	3	CNS	Bub1; CycE
GO:1903362	0.000752298	61.1407	0.0415695	2	47	regulation of cellular protein catabolic process	0.00207988	3	CNS	Bub1; CycE
GO:0022607	0.000770397	10.2297	0.832275	5	941	cellular component assembly	0.00208896	3	CNS	CycE; mira; nuf; Prosap; stau
GO:0045861	0.000817622	58.5296	0.0433384	2	49	negative regulation of proteolysis	0.0021349	3	CNS	Bub1; CycE
GO:0048103	0.000817622	58.5296	0.0433384	2	49	somatic stem cell division	0.0021349	3	CNS	mira; stau
GO:0044085	0.00113578	9.32859	0.905685	5	1024	cellular component biogenesis	0.00291174	3	CNS	CycE; mira; nuf; Prosap; stau
GO:0098722	0.00126497	46.58	0.0539519	2	61	asymmetric stem cell division	0.00312233	3	CNS	mira; stau
GO:0007389	0.0012825	11.5044	0.523599	4	592	pattern specification process	0.00312233	3	CNS	mira; nuf; sca; stau
GO:0042176	0.00130651	45.8	0.0548364	2	62	regulation of protein catabolic process	0.00312233	3	CNS	Bub1; CycE
GO:2000241	0.00130651	45.8	0.0548364	2	62	regulation of reproductive process	0.00312233	3	CNS	mira; stau
GO:0045451	0.00156934	41.6162	0.0601431	2	68	pole plasm oskar mRNA localization	0.00368794	3	CNS	mira; stau
GO:0007088	0.0016154	40.9917	0.0610276	2	69	regulation of mitotic nuclear division	0.00373397	3	CNS	Bub1; CycE
GO:0007316	0.00175746	39.2254	0.063681	2	72	pole plasm RNA localization	0.00393336	3	CNS	mira; stau
GO:0019094	0.00175746	39.2254	0.063681	2	72	pole plasm mRNA localization	0.00393336	3	CNS	mira; stau
GO:0051783	0.00180609	38.6698	0.0645654	2	73	regulation of nuclear division	0.00397905	3	CNS	Bub1; CycE
GO:0048663	0.00185537	38.1296	0.0654499	2	74	neuron fate commitment	0.00402472	3	CNS	CycE; sca
GO:0060811	0.00205884	36.1111	0.0689877	2	78	intracellular mRNA localization involved in anterior/posterior axis specification	0.00439843	3	CNS	mira; stau
GO:0007315	0.00216439	35.1795	0.0707566	2	80	pole plasm assembly	0.0045549	3	CNS	mira; stau
GO:0060810	0.00221811	34.7314	0.0716411	2	81	intracellular mRNA localization involved in pattern specification process	0.00459932	3	CNS	mira; stau
GO:0043086	0.00227247	34.2944	0.0725255	2	82	negative regulation of catalytic activity	0.00464373	3	CNS	Bub1; CycE
GO:0031400	0.00243932	33.0469	0.0751789	2	85	negative regulation of protein modification process	0.00491348	3	CNS	Bub1; CycE
GO:0007405	0.00249619	32.6508	0.0760634	2	86	neuroblast proliferation	0.00493247	3	CNS	mira; stau
GO:0045995	0.00255369	32.2641	0.0769478	2	87	regulation of embryonic development	0.00493247	3	CNS	mira; stau
GO:0061351	0.00255369	32.2641	0.0769478	2	87	neural precursor cell proliferation	0.00493247	3	CNS	mira; stau
GO:0007028	0.00261182	31.8863	0.0778323	2	88	cytoplasm organization	0.00494342	3	CNS	mira; stau
GO:0032879	0.00262948	13.8316	0.292755	3	331	regulation of localization	0.00494342	3	CNS	Glut1; mira; stau
GO:0008283	0.00267497	13.7455	0.294524	3	333	cell proliferation	0.00496277	3	CNS	CycE; mira; stau
GO:0017145	0.00272995	31.1566	0.0796012	2	90	stem cell division	0.00499899	3	CNS	mira; stau
GO:0051302	0.00285057	30.4593	0.0813701	2	92	regulation of cell division	0.00513429	3	CNS	Bub1; CycE
GO:0044763	0.00287666	11.6142	5.09359	10	5759	single-organism cellular process	0.00513429	3	CNS	Bsg25A; Bub1; CycE; Glut1; mira; nuf; Picot; Prosap; sca; stau
GO:0008298	0.00297368	29.7923	0.083139	2	94	intracellular mRNA localization	0.00517641	3	CNS	mira; stau
GO:0010638	0.00297368	29.7923	0.083139	2	94	positive regulation of organelle organization	0.00517641	3	CNS	Bsg25A; stau
GO:0044092	0.00303616	29.4695	0.0840235	2	95	negative regulation of molecular function	0.00522072	3	CNS	Bub1; CycE
GO:0072089	0.00329228	28.2451	0.0875613	2	99	stem cell proliferation	0.00559291	3	CNS	mira; stau
GO:0007314	0.00362625	26.8497	0.0919836	2	104	oocyte anterior/posterior axis specification	0.00608693	3	CNS	mira; stau
GO:1902589	0.00367588	6.98766	1.17544	5	1329	single-organism organelle organization	0.00609763	3	CNS	Bub1; CycE; nuf; Prosap; sca
GO:0033044	0.00383397	26.0762	0.094637	2	107	regulation of chromosome organization	0.00627799	3	CNS	Bsg25A; Bub1
GO:0008358	0.00390442	25.8281	0.0955214	2	108	maternal determination of anterior/posterior axis, embryo	0.00627799	3	CNS	mira; stau
GO:0007476	0.00391818	11.9524	0.336978	3	381	imaginal disc-derived wing morphogenesis	0.00627799	3	CNS	CycE; nuf; sca
GO:0051338	0.00397548	25.5846	0.0964059	2	109	regulation of transferase activity	0.00629824	3	CNS	Bub1; CycE
GO:0007472	0.0040947	11.7598	0.342285	3	387	wing disc morphogenesis	0.00641504	3	CNS	CycE; nuf; sca
GO:0045468	0.00441518	310.55	0.00442229	1	5	regulation of R8 cell spacing in compound eye	0.00684111	3	CNS	sca
GO:0022402	0.00452628	7.98348	0.737638	4	834	cell cycle process	0.00693702	3	CNS	Bub1; CycE; nuf; sca
GO:0035120	0.00554022	10.5123	0.381201	3	431	post-embryonic appendage morphogenesis	0.00836436	3	CNS	CycE; nuf; sca
GO:0032268	0.00557624	10.4869	0.382086	3	432	regulation of cellular protein metabolic process	0.00836436	3	CNS	Bub1; CycE; stau
GO:0031329	0.00569041	21.1835	0.115864	2	131	regulation of cellular catabolic process	0.00844577	3	CNS	Bub1; CycE
GO:0035114	0.00583237	10.3125	0.388277	3	439	imaginal disc-derived appendage morphogenesis	0.00849863	3	CNS	CycE; nuf; sca
GO:0080090	0.00588142	6.19177	1.30811	5	1479	regulation of primary metabolic process	0.00849863	3	CNS	Bsg25A; Bub1; CycE; mira; stau
GO:0035107	0.00590685	10.2637	0.390046	3	441	appendage morphogenesis	0.00849863	3	CNS	CycE; nuf; sca
GO:0048737	0.00598191	10.2153	0.391815	3	443	imaginal disc-derived appendage development	0.00851969	3	CNS	CycE; nuf; sca
GO:0048736	0.00613377	10.1199	0.395353	3	447	appendage development	0.00856305	3	CNS	CycE; nuf; sca
GO:0072697	0.00617629	207	0.0061912	1	7	protein localization to cell cortex	0.00856305	3	CNS	mira
GO:0048699	0.00619455	7.26585	0.804856	4	910	generation of neurons	0.00856305	3	CNS	CycE; mira; sca; stau
GO:1901987	0.00674588	19.3617	0.126477	2	143	regulation of cell cycle phase transition	0.00914585	3	CNS	Bub1; CycE
GO:1901990	0.00674588	19.3617	0.126477	2	143	regulation of mitotic cell cycle phase transition	0.00914585	3	CNS	Bub1; CycE
GO:0043900	0.00683759	19.2238	0.127362	2	144	regulation of multi-organism process	0.00918191	3	CNS	mira; stau
GO:0060255	0.00697086	5.9214	1.3603	5	1538	regulation of macromolecule metabolic process	0.00921171	3	CNS	Bsg25A; Bub1; CycE; mira; stau
GO:1900087	0.00705578	177.414	0.00707566	1	8	positive regulation of G1/S transition of mitotic cell cycle	0.00921171	3	CNS	CycE
GO:1902808	0.00705578	177.414	0.00707566	1	8	positive regulation of cell cycle G1/S phase transition	0.00921171	3	CNS	CycE
GO:0007309	0.00721017	18.691	0.1309	2	148	oocyte axis specification	0.00924212	3	CNS	mira; stau
GO:0009894	0.00721017	18.691	0.1309	2	148	regulation of catabolic process	0.00924212	3	CNS	Bub1; CycE
GO:0007308	0.00759187	18.1867	0.134438	2	152	oocyte construction	0.0094135	3	CNS	mira; stau
GO:0043161	0.00788409	17.8257	0.137091	2	155	proteasome-mediated ubiquitin-dependent protein catabolic process	0.0094135	3	CNS	Bub1; CycE
GO:0007402	0.00793456	155.225	0.00796012	1	9	ganglion mother cell fate determination	0.0094135	3	CNS	mira
GO:0033962	0.00793456	155.225	0.00796012	1	9	cytoplasmic mRNA processing body assembly	0.0094135	3	CNS	stau
GO:0007049	0.00803641	6.71121	0.865884	4	979	cell cycle	0.0094135	3	CNS	Bub1; CycE; nuf; sca
GO:0098813	0.00808173	17.5928	0.13886	2	157	nuclear chromosome segregation	0.0094135	3	CNS	Bub1; sca
GO:0007560	0.00823259	9.05769	0.439575	3	497	imaginal disc morphogenesis	0.0094135	3	CNS	CycE; nuf; sca
GO:0048563	0.00823259	9.05769	0.439575	3	497	post-embryonic organ morphogenesis	0.0094135	3	CNS	CycE; nuf; sca
GO:0006403	0.00828162	17.3659	0.140629	2	159	RNA localization	0.0094135	3	CNS	mira; stau
GO:0044772	0.00828162	17.3659	0.140629	2	159	mitotic cell cycle phase transition	0.0094135	3	CNS	Bub1; CycE
GO:0000280	0.00832442	9.01966	0.441344	3	499	nuclear division	0.0094135	3	CNS	Bub1; CycE; sca
GO:0010498	0.0083824	17.2546	0.141513	2	160	proteasomal protein catabolic process	0.0094135	3	CNS	Bub1; CycE
GO:0048522	0.00848092	6.60087	0.879151	4	994	positive regulation of cellular process	0.0094135	3	CNS	Bsg25A; CycE; Glut1; stau
GO:0032269	0.00848375	17.1447	0.142398	2	161	negative regulation of cellular protein metabolic process	0.0094135	3	CNS	Bub1; CycE
GO:0051248	0.00848375	17.1447	0.142398	2	161	negative regulation of protein metabolic process	0.0094135	3	CNS	Bub1; CycE
GO:0035220	0.00855669	8.9259	0.445767	3	504	wing disc development	0.0094135	3	CNS	CycE; nuf; sca
GO:0007275	0.00862005	5.10113	2.81346	7	3181	multicellular organismal development	0.0094135	3	CNS	Bsg25A; CycE; mira; nuf; Prosap; sca; stau
GO:0044770	0.00868811	16.9289	0.144167	2	163	cell cycle phase transition	0.0094135	3	CNS	Bub1; CycE
GO:0006817	0.00881263	137.967	0.00884458	1	10	phosphate ion transport	0.0094135	3	CNS	Picot
GO:0007318	0.00881263	137.967	0.00884458	1	10	pole plasm protein localization	0.0094135	3	CNS	stau
GO:0045035	0.00881263	137.967	0.00884458	1	10	sensory organ precursor cell division	0.0094135	3	CNS	CycE
GO:1902115	0.00881263	137.967	0.00884458	1	10	regulation of organelle assembly	0.0094135	3	CNS	stau
GO:0048707	0.00888837	8.79774	0.451958	3	511	instar larval or pupal morphogenesis	0.00942301	3	CNS	CycE; nuf; sca
GO:0048285	0.00898454	8.76176	0.453727	3	513	organelle fission	0.00945388	3	CNS	Bub1; CycE; sca
GO:0007351	0.00920875	16.4123	0.148589	2	168	tripartite regional subdivision	0.00954731	3	CNS	mira; stau
GO:0008595	0.00920875	16.4123	0.148589	2	168	anterior/posterior axis specification, embryo	0.00954731	3	CNS	mira; stau
GO:0048599	0.00931454	16.3127	0.149473	2	169	oocyte development	0.0095865	3	CNS	mira; stau
GO:0009886	0.00942503	8.60332	0.461687	3	522	post-embryonic morphogenesis	0.00959363	3	CNS	CycE; nuf; sca
GO:0007399	0.00945755	5.45768	1.46024	5	1651	nervous system development	0.00959363	3	CNS	CycE; mira; Prosap; sca; stau
GO:0000578	0.00974321	15.9259	0.153011	2	173	embryonic axis specification	0.0098128	3	CNS	mira; stau
GO:0009948	0.00985174	15.832	0.153896	2	174	anterior/posterior axis specification	0.00985174	3	CNS	mira; stau
GO:0000278	5.9071e-09	50.6924	0.556324	8	629	mitotic cell cycle	3.53345e-07	4	CNS	asp; CycB3; Dl; fzy; Klp3A; Klp61F; ncd; Orc5
GO:0071822	8.95285e-09	47.9226	0.586395	8	663	protein complex subunit organization	3.53345e-07	4	CNS	asp; Chd3; CycB3; Dl; Klp3A; Klp61F; ncd; Orc5
GO:0007052	1.26207e-08	68.1544	0.195465	6	221	mitotic spindle organization	3.53345e-07	4	CNS	asp; CycB3; Klp3A; Klp61F; ncd; Orc5
GO:0007346	1.29668e-08	67.8333	0.19635	6	222	regulation of mitotic cell cycle	3.53345e-07	4	CNS	CycB3; Dl; fzy; Klp3A; Klp61F; ncd
GO:0007051	3.18507e-08	57.9714	0.22819	6	258	spindle organization	6.63695e-07	4	CNS	asp; CycB3; Klp3A; Klp61F; ncd; Orc5
GO:0007067	3.65337e-08	56.5953	0.233497	6	264	mitotic nuclear division	6.63695e-07	4	CNS	CycB3; fzy; Klp3A; Klp61F; ncd; Orc5
GO:0006996	4.41801e-08	58.3123	1.61767	10	1829	organelle organization	6.87947e-07	4	CNS	asp; Chd3; CycB3; Dl; fzy; Klp3A; Klp61F; ncd; Orc5; ref(2)P
GO:1903047	8.78215e-08	38.445	0.484683	7	548	mitotic cell cycle process	1.19657e-06	4	CNS	asp; CycB3; fzy; Klp3A; Klp61F; ncd; Orc5
GO:0051301	1.04521e-07	47.0563	0.278604	6	315	cell division	1.26587e-06	4	CNS	asp; CycB3; Dl; fzy; Klp3A; ncd
GO:0007049	1.90923e-07	31.459	0.865884	8	979	cell cycle	2.06887e-06	4	CNS	asp; CycB3; Dl; fzy; Klp3A; Klp61F; ncd; Orc5
GO:0051726	2.08785e-07	41.6483	0.313098	6	354	regulation of cell cycle	2.06887e-06	4	CNS	CycB3; Dl; fzy; Klp3A; Klp61F; ncd
GO:0043933	2.43472e-07	30.4032	0.893302	8	1010	macromolecular complex subunit organization	2.21154e-06	4	CNS	asp; Chd3; CycB3; Dl; Klp3A; Klp61F; ncd; Orc5
GO:0007010	3.70359e-07	30.7545	0.597893	7	676	cytoskeleton organization	3.10532e-06	4	CNS	asp; CycB3; Dl; Klp3A; Klp61F; ncd; Orc5
GO:0010564	4.82116e-07	51.2018	0.180429	5	204	regulation of cell cycle process	3.75362e-06	4	CNS	CycB3; fzy; Klp3A; Klp61F; ncd
GO:0000226	6.66876e-07	33.8852	0.381201	6	431	microtubule cytoskeleton organization	4.84596e-06	4	CNS	asp; CycB3; Klp3A; Klp61F; ncd; Orc5
GO:0022402	1.54664e-06	24.5444	0.737638	7	834	cell cycle process	1.01007e-05	4	CNS	asp; CycB3; fzy; Klp3A; Klp61F; ncd; Orc5
GO:0000280	1.57534e-06	29.0458	0.441344	6	499	nuclear division	1.01007e-05	4	CNS	CycB3; fzy; Klp3A; Klp61F; ncd; Orc5
GO:0048285	1.85212e-06	28.2107	0.453727	6	513	organelle fission	1.12156e-05	4	CNS	CycB3; fzy; Klp3A; Klp61F; ncd; Orc5
GO:1902589	2.04475e-06	22.4174	1.17544	8	1329	single-organism organelle organization	1.17304e-05	4	CNS	asp; CycB3; Dl; fzy; Klp3A; Klp61F; ncd; Orc5
GO:0007017	2.49912e-06	26.7236	0.477607	6	540	microtubule-based process	1.33724e-05	4	CNS	asp; CycB3; Klp3A; Klp61F; ncd; Orc5
GO:0016043	2.57633e-06	35.0707	2.44729	10	2767	cellular component organization	1.33724e-05	4	CNS	asp; Chd3; CycB3; Dl; fzy; Klp3A; Klp61F; ncd; Orc5; ref(2)P
GO:0071840	3.2427e-06	34.017	2.50567	10	2833	cellular component organization or biogenesis	1.60661e-05	4	CNS	asp; Chd3; CycB3; Dl; fzy; Klp3A; Klp61F; ncd; Orc5; ref(2)P
GO:0060236	1.98562e-05	460	0.00707566	2	8	regulation of mitotic spindle organization	9.41013e-05	4	CNS	Klp61F; ncd
GO:0007100	2.55171e-05	394.254	0.00796012	2	9	mitotic centrosome separation	0.000113897	4	CNS	Klp61F; ncd
GO:0007088	2.61231e-05	70.2273	0.0610276	3	69	regulation of mitotic nuclear division	0.000113897	4	CNS	fzy; Klp3A; ncd
GO:0051783	3.09504e-05	66.1929	0.0645654	3	73	regulation of nuclear division	0.000129754	4	CNS	fzy; Klp3A; ncd
GO:0007143	4.8866e-05	56.4512	0.0751789	3	85	female meiotic division	0.000197274	4	CNS	fzy; Klp3A; ncd
GO:0051302	6.192e-05	51.9817	0.0813701	3	92	regulation of cell division	0.000241046	4	CNS	fzy; Klp3A; ncd
GO:1903046	7.22332e-05	25.2488	0.246764	4	279	meiotic cell cycle process	0.000271497	4	CNS	asp; fzy; Klp3A; ncd
GO:0051321	7.53047e-05	24.9702	0.249417	4	282	meiotic cell cycle	0.000273607	4	CNS	asp; fzy; Klp3A; ncd
GO:0033043	8.62368e-05	24.0833	0.258262	4	292	regulation of organelle organization	0.00030322	4	CNS	fzy; Klp3A; Klp61F; ncd
GO:0090224	0.000107978	172.361	0.0159202	2	18	regulation of spindle organization	0.000367799	4	CNS	Klp61F; ncd
GO:0007018	0.000133259	39.7953	0.10525	3	119	microtubule-based movement	0.000440158	4	CNS	Klp3A; Klp61F; ncd
GO:0051299	0.00014799	145.111	0.0185736	2	21	centrosome separation	0.000474439	4	CNS	Klp61F; ncd
GO:0006461	0.000166396	20.1905	0.306022	4	346	protein complex assembly	0.000510193	4	CNS	asp; Klp3A; Klp61F; ncd
GO:0070271	0.000172032	20.0099	0.308676	4	349	protein complex biogenesis	0.000510193	4	CNS	asp; Klp3A; Klp61F; ncd
GO:0051297	0.000173185	36.3159	0.114979	3	130	centrosome organization	0.000510193	4	CNS	asp; Klp61F; ncd
GO:0031023	0.000193644	34.9261	0.119402	3	135	microtubule organizing center organization	0.000555453	4	CNS	asp; Klp61F; ncd
GO:0000079	0.000211007	119.836	0.0221114	2	25	regulation of cyclin-dependent protein serine/threonine kinase activity	0.000574994	4	CNS	CycB3; fzy
GO:1904029	0.000211007	119.836	0.0221114	2	25	regulation of cyclin-dependent protein kinase activity	0.000574994	4	CNS	CycB3; fzy
GO:0098813	0.0003023	29.8831	0.13886	3	157	nuclear chromosome segregation	0.000803675	4	CNS	Klp3A; ncd; Orc5
GO:0065003	0.000359945	16.375	0.374126	4	423	macromolecular complex assembly	0.000934143	4	CNS	asp; Klp3A; Klp61F; ncd
GO:0001578	0.000392873	86.0694	0.0300716	2	34	microtubule bundle formation	0.000995887	4	CNS	Klp61F; ncd
GO:0007059	0.000437082	26.2521	0.157433	3	178	chromosome segregation	0.00108277	4	CNS	Klp3A; ncd; Orc5
GO:0070507	0.000689634	63.9948	0.0398006	2	45	regulation of microtubule cytoskeleton organization	0.00167045	4	CNS	Klp61F; ncd
GO:0090307	0.000817622	58.5296	0.0433384	2	49	mitotic spindle assembly	0.00193311	4	CNS	Klp3A; ncd
GO:0031109	0.000851278	57.3056	0.0442229	2	50	microtubule polymerization or depolymerization	0.00193311	4	CNS	asp; Klp61F
GO:0071900	0.000851278	57.3056	0.0442229	2	50	regulation of protein serine/threonine kinase activity	0.00193311	4	CNS	CycB3; fzy
GO:1902850	0.000885597	56.1315	0.0451073	2	51	microtubule cytoskeleton organization involved in mitosis	0.00197	4	CNS	Klp3A; ncd
GO:0032886	0.000956216	53.9216	0.0468763	2	53	regulation of microtubule-based process	0.00208455	4	CNS	Klp61F; ncd
GO:0030718	0.00139153	44.3154	0.0566053	2	64	germ-line stem cell population maintenance	0.00297405	4	CNS	Dl; fzy
GO:0006261	0.00143501	43.6085	0.0574897	2	65	DNA-dependent DNA replication	0.003008	4	CNS	CG2990; Orc5
GO:0007126	0.00153064	16.8196	0.242341	3	274	meiotic nuclear division	0.00314793	4	CNS	fzy; Klp3A; ncd
GO:0006259	0.0016627	16.3266	0.249417	3	282	DNA metabolic process	0.00331975	4	CNS	CG2990; Klp3A; Orc5
GO:0006928	0.0016751	10.6637	0.562515	4	636	movement of cell or subcellular component	0.00331975	4	CNS	Dl; Klp3A; Klp61F; ncd
GO:0045132	0.00185537	38.1296	0.0654499	2	74	meiotic chromosome segregation	0.00361134	4	CNS	Klp3A; ncd
GO:0051128	0.00192175	10.2526	0.583742	4	660	regulation of cellular component organization	0.00367492	4	CNS	fzy; Klp3A; Klp61F; ncd
GO:0019827	0.00227247	34.2944	0.0725255	2	82	stem cell population maintenance	0.00419828	4	CNS	Dl; fzy
GO:0098727	0.00227247	34.2944	0.0725255	2	82	maintenance of cell number	0.00419828	4	CNS	Dl; fzy
GO:0051225	0.00238307	33.4526	0.0742944	2	84	spindle assembly	0.0042204	4	CNS	Klp3A; ncd
GO:0051231	0.00238307	33.4526	0.0742944	2	84	spindle elongation	0.0042204	4	CNS	Klp3A; ncd
GO:0007127	0.00243932	33.0469	0.0751789	2	85	meiosis I	0.0042204	4	CNS	fzy; Klp3A
GO:0051298	0.00243932	33.0469	0.0751789	2	85	centrosome duplication	0.0042204	4	CNS	Klp61F; ncd
GO:0045859	0.00249619	32.6508	0.0760634	2	86	regulation of protein kinase activity	0.00425132	4	CNS	CycB3; fzy
GO:0043549	0.00255369	32.2641	0.0769478	2	87	regulation of kinase activity	0.00428234	4	CNS	CycB3; fzy
GO:0006260	0.00303616	29.4695	0.0840235	2	95	DNA replication	0.00501427	4	CNS	CG2990; Orc5
GO:0008356	0.00322733	28.5417	0.0866769	2	98	asymmetric cell division	0.00525043	4	CNS	asp; Dl
GO:0007098	0.00349083	27.3911	0.0902147	2	102	centrosome cycle	0.00559559	4	CNS	Klp61F; ncd
GO:0061640	0.00390442	25.8281	0.0955214	2	108	cytoskeleton-dependent cytokinesis	0.00610321	4	CNS	CycB3; Klp3A
GO:0051338	0.00397548	25.5846	0.0964059	2	109	regulation of transferase activity	0.00610321	4	CNS	CycB3; fzy
GO:0051493	0.00397548	25.5846	0.0964059	2	109	regulation of cytoskeleton organization	0.00610321	4	CNS	Klp61F; ncd
GO:0000910	0.0041923	24.8808	0.0990593	2	112	cytokinesis	0.0063323	4	CNS	CycB3; Klp3A
GO:0030037	0.00441518	310.55	0.00442229	1	5	actin filament reorganization involved in cell cycle	0.0063323	4	CNS	asp
GO:0045468	0.00441518	310.55	0.00442229	1	5	regulation of R8 cell spacing in compound eye	0.0063323	4	CNS	Dl
GO:0090527	0.00441518	310.55	0.00442229	1	5	actin filament reorganization	0.0063323	4	CNS	asp
GO:0097150	0.00441518	310.55	0.00442229	1	5	neuronal stem cell population maintenance	0.0063323	4	CNS	fzy
GO:0009987	0.00502932	Inf	6.80059	11	7689	cellular process	0.0068723	4	CNS	asp; CG2990; Chd3; CycB3; Dl; fzy; Klp3A; Klp61F; ncd; Orc5; ref(2)P
GO:0007293	0.0050335	22.5987	0.108788	2	123	germarium-derived egg chamber formation	0.0068723	4	CNS	asp; Dl
GO:0007147	0.00529609	248.42	0.00530675	1	6	female meiosis II	0.0068723	4	CNS	fzy
GO:0007451	0.00529609	248.42	0.00530675	1	6	dorsal/ventral lineage restriction, imaginal disc	0.0068723	4	CNS	Dl
GO:0032837	0.00529609	248.42	0.00530675	1	6	distributive segregation	0.0068723	4	CNS	ncd
GO:0035155	0.00529609	248.42	0.00530675	1	6	negative regulation of terminal cell fate specification, open tracheal system	0.0068723	4	CNS	Dl
GO:0043148	0.00529609	248.42	0.00530675	1	6	mitotic spindle stabilization	0.0068723	4	CNS	Klp61F
GO:0051262	0.00529609	248.42	0.00530675	1	6	protein tetramerization	0.0068723	4	CNS	Klp61F
GO:0030382	0.00617629	207	0.0061912	1	7	sperm mitochondrion organization	0.00782808	4	CNS	ref(2)P
GO:0035156	0.00617629	207	0.0061912	1	7	fusion cell fate specification	0.00782808	4	CNS	Dl
GO:0050794	0.00632897	5.46962	2.67018	7	3019	regulation of cellular process	0.00792939	4	CNS	CycB3; Dl; fzy; Klp3A; Klp61F; ncd; Orc5
GO:1901987	0.00674588	19.3617	0.126477	2	143	regulation of cell cycle phase transition	0.0081817	4	CNS	CycB3; fzy
GO:1901990	0.00674588	19.3617	0.126477	2	143	regulation of mitotic cell cycle phase transition	0.0081817	4	CNS	CycB3; fzy
GO:0007015	0.00683759	19.2238	0.127362	2	144	actin filament organization	0.0081817	4	CNS	asp; Dl
GO:0022607	0.0069817	7.00656	0.832275	4	941	cellular component assembly	0.0081817	4	CNS	asp; Klp3A; Klp61F; ncd
GO:0006271	0.00705578	177.414	0.00707566	1	8	DNA strand elongation involved in DNA replication	0.0081817	4	CNS	CG2990
GO:0007144	0.00705578	177.414	0.00707566	1	8	female meiosis I	0.0081817	4	CNS	fzy
GO:0022616	0.00705578	177.414	0.00707566	1	8	DNA strand elongation	0.0081817	4	CNS	CG2990
GO:0016330	0.00793456	155.225	0.00796012	1	9	second mitotic wave involved in compound eye morphogenesis	0.00891615	4	CNS	Dl
GO:0035154	0.00793456	155.225	0.00796012	1	9	terminal cell fate specification, open tracheal system	0.00891615	4	CNS	Dl
GO:0051383	0.00793456	155.225	0.00796012	1	9	kinetochore organization	0.00891615	4	CNS	asp
GO:0000003	0.00824485	5.6629	1.41425	5	1599	reproduction	0.00897736	4	CNS	asp; Dl; fzy; Klp3A; ncd
GO:0044772	0.00828162	17.3659	0.140629	2	159	mitotic cell cycle phase transition	0.00897736	4	CNS	CycB3; fzy
GO:0044770	0.00868811	16.9289	0.144167	2	163	cell cycle phase transition	0.00897736	4	CNS	CycB3; fzy
GO:0016032	0.00881263	137.967	0.00884458	1	10	viral process	0.00897736	4	CNS	ref(2)P
GO:0019058	0.00881263	137.967	0.00884458	1	10	viral life cycle	0.00897736	4	CNS	ref(2)P
GO:0030723	0.00881263	137.967	0.00884458	1	10	ovarian fusome organization	0.00897736	4	CNS	asp
GO:0035161	0.00881263	137.967	0.00884458	1	10	imaginal disc lineage restriction	0.00897736	4	CNS	Dl
GO:0042766	0.00881263	137.967	0.00884458	1	10	nucleosome mobilization	0.00897736	4	CNS	Chd3
GO:0044764	0.00881263	137.967	0.00884458	1	10	multi-organism cellular process	0.00897736	4	CNS	ref(2)P
GO:1902115	0.00881263	137.967	0.00884458	1	10	regulation of organelle assembly	0.00897736	4	CNS	ncd
GO:0044085	0.0094193	6.38992	0.905685	4	1024	cellular component biogenesis	0.00950652	4	CNS	asp; Klp3A; Klp61F; ncd
GO:0008054	0.00969	124.16	0.00972903	1	11	negative regulation of cyclin-dependent protein serine/threonine kinase by cyclin degradation	0.00969	4	CNS	fzy
GO:0007416	0.000601549	22.3145	0.172228	3	153	synapse assembly	0.00842168	5	CNS	Ank2; ewg; Gs2
GO:0050808	0.00165424	15.5595	0.244271	3	217	synapse organization	0.00873695	5	CNS	Ank2; ewg; Gs2
GO:1901565	0.00407479	24.4821	0.0968079	2	86	organonitrogen compound catabolic process	0.00873695	5	CNS	Cht3; Gs2
GO:0008582	0.00474795	22.5861	0.104688	2	93	regulation of synaptic growth at neuromuscular junction	0.00873695	5	CNS	Ank2; ewg
GO:1904396	0.00474795	22.5861	0.104688	2	93	regulation of neuromuscular junction development	0.00873695	5	CNS	Ank2; ewg
GO:0051963	0.00525822	21.401	0.110316	2	98	regulation of synapse assembly	0.00873695	5	CNS	Ank2; ewg
GO:0035331	0.00561661	238.827	0.00562837	1	5	negative regulation of hippo signaling	0.00873695	5	CNS	sd
GO:0043649	0.00561661	238.827	0.00562837	1	5	dicarboxylic acid catabolic process	0.00873695	5	CNS	Gs2
GO:2000826	0.00561661	238.827	0.00562837	1	5	regulation of heart morphogenesis	0.00873695	5	CNS	sd
GO:0007272	0.00785504	159.192	0.00787971	1	7	ensheathment of neurons	0.00879669	5	CNS	wrapper
GO:0008366	0.00785504	159.192	0.00787971	1	7	axon ensheathment	0.00879669	5	CNS	wrapper
GO:0050807	0.00816835	16.9449	0.138458	2	123	regulation of synapse organization	0.00879669	5	CNS	Ank2; ewg
GO:0051124	0.00816835	16.9449	0.138458	2	123	synaptic growth at neuromuscular junction	0.00879669	5	CNS	Ank2; ewg
GO:0048738	0.0089725	136.44	0.00900539	1	8	cardiac muscle tissue development	0.0089725	5	CNS	sd
GO:0030154	8.76454e-07	5.55954	6.80751	20	2419	cell differentiation	9.59745e-05	6	CNS	Aac11; AGO2; Arf79F; bnb; brm; Cam; Dref; Ect3; faf; gammaTub37C; gro; HmgD; kis; Lis-1; pav; ras; Tl; Ulp1; wds; woc
GO:0016043	1.57304e-06	5.27458	7.78685	21	2767	cellular component organization	9.59745e-05	6	CNS	AGO2; Arf79F; brm; Cam; CG6404; CG9186; Dref; gammaTub37C; gro; HmgD; kis; lid; Lis-1; pav; pcm; ras; Tl; Trp1; Ulp1; wds; woc
GO:0043933	1.68338e-06	6.7596	2.84233	13	1010	macromolecular complex subunit organization	9.59745e-05	6	CNS	AGO2; brm; Cam; CG6404; Dref; gammaTub37C; gro; HmgD; lid; Lis-1; pav; pcm; wds
GO:0048869	1.71794e-06	5.28371	7.08893	20	2519	cellular developmental process	9.59745e-05	6	CNS	Aac11; AGO2; Arf79F; bnb; brm; Cam; Dref; Ect3; faf; gammaTub37C; gro; HmgD; kis; Lis-1; pav; ras; Tl; Ulp1; wds; woc
GO:0071840	2.36405e-06	5.11558	7.97258	21	2833	cellular component organization or biogenesis	9.59745e-05	6	CNS	AGO2; Arf79F; brm; Cam; CG6404; CG9186; Dref; gammaTub37C; gro; HmgD; kis; lid; Lis-1; pav; pcm; ras; Tl; Trp1; Ulp1; wds; woc
GO:0022008	2.51462e-06	5.84213	4.01303	15	1426	neurogenesis	9.59745e-05	6	CNS	Aac11; bnb; brm; Cam; Dref; gro; HmgD; kis; Lis-1; pav; ras; Tl; Ulp1; wds; woc
GO:0007275	3.54912e-06	4.95157	8.95192	22	3181	multicellular organismal development	0.000116107	6	CNS	Aac11; AGO2; Arf79F; bnb; brm; Cam; cin; Dref; faf; gammaTub37C; gro; HmgD; kis; lid; Lis-1; pav; pcm; ras; Tl; Ulp1; wds; woc
GO:0051647	4.46939e-06	44.3226	0.112567	4	40	nucleus localization	0.000120297	6	CNS	AGO2; faf; gammaTub37C; Lis-1
GO:0048856	4.79495e-06	4.86135	9.93407	23	3530	anatomical structure development	0.000120297	6	CNS	Aac11; AGO2; Arf79F; bnb; brm; Cam; cin; Dref; Ect3; faf; gammaTub37C; gro; HmgD; kis; lid; Lis-1; pav; pcm; ras; Tl; Ulp1; wds; woc
GO:0048667	5.25312e-06	8.72996	1.35644	9	482	cell morphogenesis involved in neuron differentiation	0.000120297	6	CNS	brm; Cam; Dref; gro; HmgD; kis; Lis-1; ras; Ulp1
GO:0048731	5.83966e-06	4.8607	6.90601	19	2454	system development	0.000121571	6	CNS	Aac11; Arf79F; bnb; brm; Cam; Dref; faf; gro; HmgD; kis; lid; Lis-1; pav; pcm; ras; Tl; Ulp1; wds; woc
GO:0000904	1.09879e-05	7.92552	1.48589	9	528	cell morphogenesis involved in differentiation	0.000209685	6	CNS	brm; Cam; Dref; gro; HmgD; kis; Lis-1; ras; Ulp1
GO:0007399	1.56512e-05	4.93551	4.64622	15	1651	nervous system development	0.000275701	6	CNS	Aac11; bnb; brm; Cam; Dref; gro; HmgD; kis; Lis-1; pav; ras; Tl; Ulp1; wds; woc
GO:0048666	1.84972e-05	6.62663	2.01496	10	716	neuron development	0.000302562	6	CNS	brm; Cam; Dref; gro; HmgD; kis; Lis-1; ras; Tl; Ulp1
GO:0048812	2.0558e-05	7.29264	1.6069	9	571	neuron projection morphogenesis	0.000313852	6	CNS	brm; Cam; Dref; gro; HmgD; kis; Lis-1; ras; Ulp1
GO:0044767	2.55389e-05	4.26713	10.8824	23	3867	single-organism developmental process	0.000349544	6	CNS	Aac11; AGO2; Arf79F; bnb; brm; Cam; cin; Dref; Ect3; faf; gammaTub37C; gro; HmgD; kis; lid; Lis-1; pav; pcm; ras; Tl; Ulp1; wds; woc
GO:0031175	2.59487e-05	7.06835	1.65474	9	588	neuron projection development	0.000349544	6	CNS	brm; Cam; Dref; gro; HmgD; kis; Lis-1; ras; Ulp1
GO:0048813	2.87327e-05	11.8966	0.613492	6	218	dendrite morphogenesis	0.000365544	6	CNS	brm; Dref; gro; HmgD; Lis-1; Ulp1
GO:0032502	3.10201e-05	4.20029	11.0006	23	3909	developmental process	0.000373874	6	CNS	Aac11; AGO2; Arf79F; bnb; brm; Cam; cin; Dref; Ect3; faf; gammaTub37C; gro; HmgD; kis; lid; Lis-1; pav; pcm; ras; Tl; Ulp1; wds; woc
GO:0016358	3.43209e-05	11.5097	0.633191	6	225	dendrite development	0.000392975	6	CNS	brm; Dref; gro; HmgD; Lis-1; Ulp1
GO:0000902	4.09136e-05	6.00103	2.20913	10	785	cell morphogenesis	0.000446153	6	CNS	Arf79F; brm; Cam; Dref; gro; HmgD; kis; Lis-1; ras; Ulp1
GO:0048858	4.69482e-05	6.52265	1.78419	9	634	cell projection morphogenesis	0.000488688	6	CNS	brm; Cam; Dref; gro; HmgD; kis; Lis-1; ras; Ulp1
GO:0032990	5.17816e-05	6.43584	1.80671	9	642	cell part morphogenesis	0.000515564	6	CNS	brm; Cam; Dref; gro; HmgD; kis; Lis-1; ras; Ulp1
GO:0007097	5.70193e-05	48.3516	0.075983	3	27	nuclear migration	0.000544059	6	CNS	AGO2; faf; Lis-1
GO:0030182	6.50794e-05	5.65714	2.33296	10	829	neuron differentiation	0.000596128	6	CNS	brm; Cam; Dref; gro; HmgD; kis; Lis-1; ras; Tl; Ulp1
GO:0009987	8.62213e-05	6.61007	21.6383	32	7689	cellular process	0.000713637	6	CNS	Aac11; AGO2; Arf79F; bnb; brm; Cam; CG31368; CG32103; CG3605; CG3689; CG6404; CG8108; CG9186; cin; Dref; Ect3; faf; gammaTub37C; gro; HmgD; kis; lid; Lis-1; pav; pcm; pit; ras; Tl; Trp1; Ulp1; wds; woc
GO:0051225	8.6433e-05	19.8742	0.236391	4	84	spindle assembly	0.000713637	6	CNS	Cam; gammaTub37C; Lis-1; pav
GO:0044707	8.72569e-05	3.82504	10.7671	22	3826	single-multicellular organism process	0.000713637	6	CNS	Aac11; AGO2; Arf79F; bnb; brm; Cam; cin; Dref; faf; gammaTub37C; gro; HmgD; kis; lid; Lis-1; pav; pcm; ras; Tl; Ulp1; wds; woc
GO:0040023	9.57612e-05	39.9989	0.0900539	3	32	establishment of nucleus localization	0.000739135	6	CNS	AGO2; faf; Lis-1
GO:0033036	9.683e-05	5.90275	1.95867	9	696	macromolecule localization	0.000739135	6	CNS	AGO2; Arf79F; Cam; CG6404; CG9186; kis; Lis-1; pav; Trp1
GO:0009950	0.000103629	18.9217	0.247648	4	88	dorsal/ventral axis specification	0.000764576	6	CNS	faf; gammaTub37C; Lis-1; Tl
GO:0006935	0.00010684	9.29655	0.776715	6	276	chemotaxis	0.000764576	6	CNS	brm; Cam; kis; Lis-1; ras; Tl
GO:0030030	0.000126915	5.68334	2.02903	9	721	cell projection organization	0.000880712	6	CNS	brm; Cam; Dref; gro; HmgD; kis; Lis-1; ras; Ulp1
GO:0051641	0.000135814	5.14279	2.54684	10	905	cellular localization	0.000902038	6	CNS	AGO2; Arf79F; Cam; CG32103; CG6404; faf; gammaTub37C; Lis-1; pav; Trp1
GO:0032989	0.00014217	5.112	2.56091	10	910	cellular component morphogenesis	0.000902038	6	CNS	Arf79F; brm; Cam; Dref; gro; HmgD; kis; Lis-1; ras; Ulp1
GO:0048699	0.00014217	5.112	2.56091	10	910	generation of neurons	0.000902038	6	CNS	brm; Cam; Dref; gro; HmgD; kis; Lis-1; ras; Tl; Ulp1
GO:0065003	0.000147507	7.20312	1.1904	7	423	macromolecular complex assembly	0.000902038	6	CNS	AGO2; Cam; CG6404; gammaTub37C; Lis-1; pav; pcm
GO:0002376	0.000149683	7.18525	1.19321	7	424	immune system process	0.000902038	6	CNS	AGO2; Arf79F; brm; faf; kis; Tl; Ulp1
GO:0035190	0.00016015	150.267	0.0196993	2	7	syncytial nuclear migration	0.00092149	6	CNS	AGO2; faf
GO:1902580	0.000160959	7.09716	1.20728	7	429	single-organism cellular localization	0.00092149	6	CNS	Arf79F; Cam; CG6404; gammaTub37C; Lis-1; pav; Trp1
GO:0051276	0.000169918	6.09443	1.64067	8	583	chromosome organization	0.000949055	6	CNS	AGO2; brm; Cam; HmgD; lid; Lis-1; wds; woc
GO:0032388	0.000187831	31.3302	0.112567	3	40	positive regulation of intracellular transport	0.00102412	6	CNS	Cam; Lis-1; pav
GO:0044763	0.000195792	3.92729	16.2069	27	5759	single-organism cellular process	0.00104271	6	CNS	Aac11; AGO2; Arf79F; bnb; brm; Cam; CG32103; CG6404; CG8108; Dref; Ect3; faf; gammaTub37C; gro; HmgD; kis; lid; Lis-1; pav; pcm; pit; ras; Tl; Trp1; Ulp1; wds; woc
GO:0051050	0.000205354	15.7151	0.295489	4	105	positive regulation of transport	0.00106878	6	CNS	Arf79F; Cam; Lis-1; pav
GO:0009605	0.000213541	4.84397	2.69036	10	956	response to external stimulus	0.00108669	6	CNS	AGO2; brm; Cam; faf; kis; Lis-1; pcm; ras; Tl; Ulp1
GO:0002682	0.00022429	10.4333	0.562837	5	200	regulation of immune system process	0.00111658	6	CNS	Arf79F; brm; faf; Tl; Ulp1
GO:0006996	0.000231883	3.88871	5.14714	14	1829	organelle organization	0.0011225	6	CNS	AGO2; brm; Cam; CG9186; Dref; gammaTub37C; gro; HmgD; lid; Lis-1; pav; pcm; wds; woc
GO:0007409	0.000235284	7.99097	0.897725	6	319	axonogenesis	0.0011225	6	CNS	brm; Cam; kis; Lis-1; ras; Ulp1
GO:0051383	0.000273573	107.316	0.0253277	2	9	kinetochore organization	0.00127853	6	CNS	Cam; Lis-1
GO:0061564	0.000282476	7.71264	0.928681	6	330	axon development	0.00129374	6	CNS	brm; Cam; kis; Lis-1; ras; Ulp1
GO:0018205	0.000300929	14.159	0.326445	4	116	peptidyl-lysine modification	0.00135123	6	CNS	brm; lid; Ulp1; wds
GO:0006357	0.000320673	6.30497	1.35081	7	480	regulation of transcription from RNA polymerase II promoter	0.00141219	6	CNS	brm; Dref; gro; kis; Lis-1; Tl; woc
GO:0031347	0.000331743	13.7863	0.334888	4	119	regulation of defense response	0.00142126	6	CNS	brm; faf; Tl; Ulp1
GO:1903706	0.000341361	93.8939	0.0281418	2	10	regulation of hemopoiesis	0.00142126	6	CNS	Arf79F; Ulp1
GO:0048468	0.00034419	3.85867	4.67154	13	1660	cell development	0.00142126	6	CNS	AGO2; brm; Cam; Dref; Ect3; gammaTub37C; gro; HmgD; kis; Lis-1; ras; Tl; Ulp1
GO:0042330	0.000347557	7.40714	0.965265	6	343	taxis	0.00142126	6	CNS	brm; Cam; kis; Lis-1; ras; Tl
GO:0048513	0.000360218	4.0095	4.05242	12	1440	organ development	0.00144719	6	CNS	Arf79F; brm; Cam; Dref; faf; HmgD; kis; lid; Lis-1; pcm; Tl; Ulp1
GO:0048519	0.000390145	4.18566	3.47552	11	1235	negative regulation of biological process	0.0015404	6	CNS	Aac11; AGO2; brm; Cam; faf; gro; kis; Lis-1; pcm; Ulp1; wds
GO:0051640	0.000436046	8.97935	0.650076	5	231	organelle localization	0.00169245	6	CNS	AGO2; Arf79F; faf; gammaTub37C; Lis-1
GO:0080134	0.000509441	8.66667	0.67259	5	239	regulation of response to stress	0.00194437	6	CNS	brm; Cam; faf; Tl; Ulp1
GO:0048583	0.000568134	4.57701	2.4793	9	881	regulation of response to stimulus	0.00213283	6	CNS	brm; Cam; CG8108; faf; gro; Lis-1; pav; Tl; Ulp1
GO:0048523	0.000615046	4.19333	3.06746	10	1090	negative regulation of cellular process	0.0022651	6	CNS	Aac11; AGO2; brm; Cam; faf; gro; kis; Lis-1; Ulp1; wds
GO:0050896	0.000623149	3.25979	7.88816	17	2803	response to stimulus	0.0022651	6	CNS	AGO2; Arf79F; brm; Cam; CG8108; faf; gro; Hsp23; kis; Lis-1; pav; pcm; PHGPx; ras; Tl; Ulp1; wds
GO:0070925	0.00068383	8.10133	0.717617	5	255	organelle assembly	0.00242458	6	CNS	Cam; gammaTub37C; Lis-1; pav; pcm
GO:0003002	0.0006882	5.51301	1.53373	7	545	regionalization	0.00242458	6	CNS	AGO2; brm; faf; gammaTub37C; kis; Lis-1; Tl
GO:1903047	0.000711009	5.48105	1.54217	7	548	mitotic cell cycle process	0.00246422	6	CNS	brm; Cam; Dref; Lis-1; pav; Tl; wds
GO:0007051	0.000720974	8.00329	0.726059	5	258	spindle organization	0.00246422	6	CNS	Cam; Dref; gammaTub37C; Lis-1; pav
GO:0097485	0.000786221	7.84496	0.74013	5	263	neuron projection guidance	0.00251105	6	CNS	brm; Cam; kis; Lis-1; ras
GO:0051531	0.0007895	57.7576	0.0422128	2	15	NFAT protein import into nucleus	0.00251105	6	CNS	Cam; pav
GO:0051532	0.0007895	57.7576	0.0422128	2	15	regulation of NFAT protein import into nucleus	0.00251105	6	CNS	Cam; pav
GO:0051533	0.0007895	57.7576	0.0422128	2	15	positive regulation of NFAT protein import into nucleus	0.00251105	6	CNS	Cam; pav
GO:0051663	0.0007895	57.7576	0.0422128	2	15	oocyte nucleus localization involved in oocyte dorsal/ventral axis specification	0.00251105	6	CNS	gammaTub37C; Lis-1
GO:0006950	0.00087537	3.99009	3.20817	10	1140	response to stress	0.0027432	6	CNS	AGO2; brm; Cam; faf; Hsp23; pcm; PHGPx; Tl; Ulp1; wds
GO:0032501	0.000886447	3.08312	12.4302	22	4417	multicellular organismal process	0.0027432	6	CNS	Aac11; AGO2; Arf79F; bnb; brm; Cam; cin; Dref; faf; gammaTub37C; gro; HmgD; kis; lid; Lis-1; pav; pcm; ras; Tl; Ulp1; wds; woc
GO:0016573	0.000902757	17.7937	0.191364	3	68	histone acetylation	0.00275642	6	CNS	brm; lid; wds
GO:0022607	0.000915584	4.26007	2.64815	9	941	cellular component assembly	0.00275778	6	CNS	AGO2; Cam; CG6404; gammaTub37C; kis; Lis-1; pav; pcm; Tl
GO:0048518	0.00093713	3.95158	3.23631	10	1150	positive regulation of biological process	0.00275778	6	CNS	Arf79F; brm; Cam; CG8108; Dref; kis; Lis-1; pav; Tl; wds
GO:0006475	0.000982265	17.2598	0.196993	3	70	internal protein amino acid acetylation	0.00275778	6	CNS	brm; lid; wds
GO:0018393	0.000982265	17.2598	0.196993	3	70	internal peptidyl-lysine acetylation	0.00275778	6	CNS	brm; lid; wds
GO:0018394	0.000982265	17.2598	0.196993	3	70	peptidyl-lysine acetylation	0.00275778	6	CNS	brm; lid; wds
GO:0051649	0.000998907	4.59674	2.13597	8	759	establishment of localization in cell	0.00275778	6	CNS	AGO2; Arf79F; Cam; CG32103; faf; Lis-1; pav; Trp1
GO:0009953	0.00101239	10.129	0.450269	4	160	dorsal/ventral pattern formation	0.00275778	6	CNS	faf; gammaTub37C; Lis-1; Tl
GO:0042993	0.00101898	50.0485	0.0478411	2	17	positive regulation of transcription factor import into nucleus	0.00275778	6	CNS	Cam; pav
GO:0006473	0.00102363	17.0046	0.199807	3	71	protein acetylation	0.00275778	6	CNS	brm; lid; wds
GO:0032386	0.00102363	17.0046	0.199807	3	71	regulation of intracellular transport	0.00275778	6	CNS	Cam; Lis-1; pav
GO:0007389	0.00112059	5.05	1.666	7	592	pattern specification process	0.00297955	6	CNS	AGO2; brm; faf; gammaTub37C; kis; Lis-1; Tl
GO:0051179	0.00113684	3.24255	5.9914	14	2129	localization	0.00297955	6	CNS	AGO2; Arf79F; brm; Cam; CG32103; CG6404; CG9186; faf; gammaTub37C; kis; Lis-1; pav; ras; Trp1
GO:0045595	0.00114498	7.18921	0.804856	5	286	regulation of cell differentiation	0.00297955	6	CNS	Arf79F; brm; Lis-1; Tl; Ulp1
GO:0033365	0.00118679	9.6885	0.469969	4	167	protein localization to organelle	0.00305366	6	CNS	Cam; Lis-1; pav; Trp1
GO:0042221	0.00122348	4.07506	2.7579	9	980	response to chemical	0.00311307	6	CNS	AGO2; brm; Cam; kis; Lis-1; PHGPx; ras; Tl; Ulp1
GO:0042307	0.0012767	44.1533	0.0534695	2	19	positive regulation of protein import into nucleus	0.00314371	6	CNS	Cam; pav
GO:1900182	0.0012767	44.1533	0.0534695	2	19	positive regulation of protein localization to nucleus	0.00314371	6	CNS	Cam; pav
GO:1904591	0.0012767	44.1533	0.0534695	2	19	positive regulation of protein import	0.00314371	6	CNS	Cam; pav
GO:0048522	0.00135277	4.01222	2.7973	9	994	positive regulation of cellular process	0.00329559	6	CNS	Arf79F; brm; Cam; CG8108; Dref; Lis-1; pav; Tl; wds
GO:0043966	0.00141606	41.697	0.0562837	2	20	histone H3 acetylation	0.00341344	6	CNS	brm; lid
GO:0045088	0.00144622	15.0061	0.225135	3	80	regulation of innate immune response	0.00344018	6	CNS	brm; faf; Tl
GO:0040011	0.00147973	4.79967	1.74761	7	621	locomotion	0.00344018	6	CNS	brm; Cam; faf; kis; Lis-1; ras; Tl
GO:0009653	0.00148203	3.23396	5.42856	13	1929	anatomical structure morphogenesis	0.00344018	6	CNS	AGO2; Arf79F; brm; Cam; Dref; faf; gro; HmgD; kis; Lis-1; pcm; ras; Ulp1
GO:0042592	0.00150134	6.74638	0.855512	5	304	homeostatic process	0.00344018	6	CNS	brm; Cam; Dref; Lis-1; woc
GO:0009966	0.00150749	4.78328	1.75324	7	623	regulation of signal transduction	0.00344018	6	CNS	brm; Cam; CG8108; gro; Lis-1; pav; Ulp1
GO:0050794	0.0015252	2.95729	8.49602	17	3019	regulation of cellular process	0.00344018	6	CNS	Aac11; AGO2; Arf79F; brm; Cam; CG8108; Dref; faf; gro; kis; Lis-1; pav; pcm; Tl; Ulp1; wds; woc
GO:0030097	0.00155289	14.6238	0.230763	3	82	hemopoiesis	0.00344018	6	CNS	Arf79F; Tl; Ulp1
GO:0042990	0.00156235	39.4992	0.0590979	2	21	regulation of transcription factor import into nucleus	0.00344018	6	CNS	Cam; pav
GO:0042991	0.00156235	39.4992	0.0590979	2	21	transcription factor import into nucleus	0.00344018	6	CNS	Cam; pav
GO:0000278	0.00159323	4.73473	1.77012	7	629	mitotic cell cycle	0.00347476	6	CNS	brm; Cam; Dref; Lis-1; pav; Tl; wds
GO:0012501	0.00163661	6.61038	0.872397	5	310	programmed cell death	0.0035357	6	CNS	Aac11; AGO2; Cam; Dref; Ect3
GO:0044085	0.00166758	3.8834	2.88172	9	1024	cellular component biogenesis	0.00356894	6	CNS	AGO2; Cam; CG6404; gammaTub37C; kis; Lis-1; pav; pcm; Tl
GO:0006928	0.00169806	4.67925	1.78982	7	636	movement of cell or subcellular component	0.00359039	6	CNS	brm; Cam; faf; kis; Lis-1; pav; ras
GO:0046824	0.00171556	37.5212	0.061912	2	22	positive regulation of nucleocytoplasmic transport	0.00359039	6	CNS	Cam; pav
GO:2000026	0.00172464	5.37121	1.31141	6	466	regulation of multicellular organismal development	0.00359039	6	CNS	Arf79F; brm; Dref; kis; Lis-1; Ulp1
GO:0022402	0.00183316	4.15245	2.34703	8	834	cell cycle process	0.00373057	6	CNS	brm; Cam; Dref; gammaTub37C; Lis-1; pav; Tl; wds
GO:0035071	0.00184085	13.7478	0.244834	3	87	salivary gland cell autophagic cell death	0.00373057	6	CNS	AGO2; Cam; Ect3
GO:0048102	0.00184085	13.7478	0.244834	3	87	autophagic cell death	0.00373057	6	CNS	AGO2; Cam; Ect3
GO:0072499	0.00187563	35.7316	0.0647262	2	23	photoreceptor cell axon guidance	0.00375513	6	CNS	Cam; Lis-1
GO:1902582	0.00190066	5.26417	1.33674	6	475	single-organism intracellular transport	0.00375513	6	CNS	Arf79F; Cam; CG32103; Lis-1; pav; Trp1
GO:0032880	0.00190216	13.5849	0.247648	3	88	regulation of protein localization	0.00375513	6	CNS	Cam; kis; pav
GO:0051239	0.00197528	4.54954	1.83766	7	653	regulation of multicellular organismal process	0.00386615	6	CNS	Arf79F; brm; Dref; kis; Lis-1; Tl; Ulp1
GO:0065008	0.00206655	3.75413	2.97178	9	1056	regulation of biological quality	0.0040105	6	CNS	Arf79F; brm; Cam; CG9186; Dref; kis; Lis-1; pav; woc
GO:0051235	0.00209372	13.1186	0.256091	3	91	maintenance of location	0.00402909	6	CNS	Arf79F; CG9186; pav
GO:0071822	0.00215417	4.47637	1.8658	7	663	protein complex subunit organization	0.00411087	6	CNS	Cam; CG6404; Dref; gammaTub37C; gro; Lis-1; pav
GO:0032879	0.00218164	6.17382	0.931495	5	331	regulation of localization	0.0041134	6	CNS	Arf79F; Cam; kis; Lis-1; pav
GO:0050793	0.00219142	4.46201	1.87143	7	665	regulation of developmental process	0.0041134	6	CNS	Arf79F; brm; Dref; kis; Lis-1; Tl; Ulp1
GO:0008283	0.00223972	6.13516	0.937123	5	333	cell proliferation	0.00416988	6	CNS	brm; Dref; Lis-1; pit; Tl
GO:0043543	0.00229689	12.683	0.264533	3	94	protein acylation	0.00424185	6	CNS	brm; lid; wds
GO:0016070	0.00232848	3.2887	4.30007	11	1528	RNA metabolic process	0.00426577	6	CNS	AGO2; brm; CG31368; CG3605; CG3689; Dref; gro; kis; pcm; Tl; woc
GO:0051656	0.00242773	7.91247	0.571279	4	203	establishment of organelle localization	0.00435665	6	CNS	AGO2; Arf79F; faf; Lis-1
GO:0002520	0.00243892	12.4083	0.270162	3	96	immune system development	0.00435665	6	CNS	Arf79F; Tl; Ulp1
GO:0048534	0.00243892	12.4083	0.270162	3	96	hematopoietic or lymphoid organ development	0.00435665	6	CNS	Arf79F; Tl; Ulp1
GO:0060255	0.00245418	3.26416	4.32821	11	1538	regulation of macromolecule metabolic process	0.00435665	6	CNS	AGO2; brm; Dref; faf; gro; kis; Lis-1; pcm; Tl; wds; woc
GO:0008219	0.00251517	5.96686	0.962451	5	342	cell death	0.00439675	6	CNS	Aac11; AGO2; Cam; Dref; Ect3
GO:0034613	0.00251517	5.96686	0.962451	5	342	cellular protein localization	0.00439675	6	CNS	Cam; CG6404; Lis-1; pav; Trp1
GO:0016246	0.00258386	30.0048	0.075983	2	27	RNA interference	0.00448261	6	CNS	AGO2; pcm
GO:0006461	0.00264522	5.89492	0.973707	5	346	protein complex assembly	0.00452057	6	CNS	Cam; CG6404; gammaTub37C; Lis-1; pav
GO:0016265	0.00264522	5.89492	0.973707	5	346	death	0.00452057	6	CNS	Aac11; AGO2; Cam; Dref; Ect3
GO:0051716	0.00269955	3.09313	5.07116	12	1802	cellular response to stimulus	0.00457624	6	CNS	AGO2; Arf79F; brm; Cam; CG8108; gro; Lis-1; pav; pcm; Tl; Ulp1; wds
GO:0070271	0.00274594	5.84205	0.98215	5	349	protein complex biogenesis	0.00457624	6	CNS	Cam; CG6404; gammaTub37C; Lis-1; pav
GO:0045610	0.00277772	28.8485	0.0787971	2	28	regulation of hemocyte differentiation	0.00457624	6	CNS	Tl; Ulp1
GO:0046716	0.00277772	28.8485	0.0787971	2	28	muscle cell cellular homeostasis	0.00457624	6	CNS	Cam; Lis-1
GO:0090316	0.00277772	28.8485	0.0787971	2	28	positive regulation of intracellular protein transport	0.00457624	6	CNS	Cam; pav
GO:1902589	0.00281834	3.36103	3.74005	10	1329	single-organism organelle organization	0.00460999	6	CNS	brm; Cam; Dref; gammaTub37C; gro; lid; Lis-1; pav; wds; woc
GO:0007098	0.00289731	11.6506	0.287047	3	102	centrosome cycle	0.0046929	6	CNS	Cam; Lis-1; pav
GO:0006366	0.00291001	4.81449	1.45493	6	517	transcription from RNA polymerase II promoter	0.0046929	6	CNS	brm; Dref; gro; kis; Tl; woc
GO:1903829	0.00297822	27.7778	0.0816113	2	29	positive regulation of cellular protein localization	0.00476932	6	CNS	Cam; pav
GO:0051049	0.00303802	7.41935	0.607864	4	216	regulation of transport	0.00482133	6	CNS	Arf79F; Cam; Lis-1; pav
GO:0008104	0.00305281	4.76584	1.469	6	522	protein localization	0.00482133	6	CNS	Cam; CG6404; kis; Lis-1; pav; Trp1
GO:0023051	0.00317092	4.16038	1.99807	7	710	regulation of signaling	0.00496218	6	CNS	brm; Cam; CG8108; gro; Lis-1; pav; Ulp1
GO:1903651	0.00318533	26.7835	0.0844255	2	30	positive regulation of cytoplasmic transport	0.00496218	6	CNS	Cam; pav
GO:0045184	0.00340995	5.54328	1.03281	5	367	establishment of protein localization	0.0052762	6	CNS	Cam; CG6404; Lis-1; pav; Trp1
GO:0010646	0.00350886	4.08031	2.03465	7	723	regulation of cell communication	0.00539282	6	CNS	brm; Cam; CG8108; gro; Lis-1; pav; Ulp1
GO:0006952	0.00361338	5.46549	1.04688	5	372	defense response	0.00545265	6	CNS	AGO2; brm; faf; Tl; Ulp1
GO:0042306	0.00361923	24.9939	0.0900539	2	32	regulation of protein import into nucleus	0.00545265	6	CNS	Cam; pav
GO:1904589	0.00361923	24.9939	0.0900539	2	32	regulation of protein import	0.00545265	6	CNS	Cam; pav
GO:0001700	0.00368809	7.01498	0.641634	4	228	embryonic development via the syncytial blastoderm	0.00548274	6	CNS	AGO2; cin; faf; pcm
GO:0018193	0.00368809	7.01498	0.641634	4	228	peptidyl-amino acid modification	0.00548274	6	CNS	brm; lid; Ulp1; wds
GO:0046907	0.00371103	4.57137	1.5281	6	543	intracellular transport	0.00548274	6	CNS	Arf79F; Cam; CG32103; Lis-1; pav; Trp1
GO:0046483	0.00375846	2.86428	6.00547	13	2134	heterocycle metabolic process	0.00551723	6	CNS	AGO2; brm; CG31368; CG3605; CG3689; cin; Dref; gro; kis; pcm; ras; Tl; woc
GO:1900180	0.00384594	24.1857	0.0928681	2	33	regulation of protein localization to nucleus	0.00557145	6	CNS	Cam; pav
GO:1903533	0.00384594	24.1857	0.0928681	2	33	regulation of protein targeting	0.00557145	6	CNS	Cam; pav
GO:0060249	0.00386838	10.4761	0.318003	3	113	anatomical structure homeostasis	0.00557145	6	CNS	Cam; Lis-1; woc
GO:1902578	0.00389539	3.05263	4.58712	11	1630	single-organism localization	0.00557527	6	CNS	AGO2; Arf79F; brm; Cam; CG32103; CG6404; gammaTub37C; Lis-1; pav; ras; Trp1
GO:0065007	0.00403754	2.61845	10.1001	18	3589	biological regulation	0.00569968	6	CNS	Aac11; AGO2; Arf79F; brm; Cam; CG8108; CG9186; Dref; faf; gro; kis; Lis-1; pav; pcm; Tl; Ulp1; wds; woc
GO:0045930	0.00406374	10.2874	0.323631	3	115	negative regulation of mitotic cell cycle	0.00569968	6	CNS	brm; Lis-1; wds
GO:0006355	0.00410675	3.60877	2.67066	8	949	regulation of transcription, DNA-templated	0.00569968	6	CNS	AGO2; brm; Dref; gro; kis; Lis-1; Tl; woc
GO:1903506	0.00410675	3.60877	2.67066	8	949	regulation of nucleic acid-templated transcription	0.00569968	6	CNS	AGO2; brm; Dref; gro; kis; Lis-1; Tl; woc
GO:2001141	0.00410675	3.60877	2.67066	8	949	regulation of RNA biosynthetic process	0.00569968	6	CNS	AGO2; brm; Dref; gro; kis; Lis-1; Tl; woc
GO:0050789	0.0042221	2.6255	9.28118	17	3298	regulation of biological process	0.00582226	6	CNS	Aac11; AGO2; Arf79F; brm; Cam; CG8108; Dref; faf; gro; kis; Lis-1; pav; pcm; Tl; Ulp1; wds; woc
GO:0044699	0.00424593	3.14099	21.2358	29	7546	single-organism process	0.00582226	6	CNS	Aac11; AGO2; Arf79F; bnb; brm; Cam; CG32103; CG6404; CG8108; cin; Dref; Ect3; faf; gammaTub37C; gro; HmgD; kis; lid; Lis-1; pav; pcm; PHGPx; pit; ras; Tl; Trp1; Ulp1; wds; woc
GO:0009792	0.00455949	6.59474	0.681032	4	242	embryo development ending in birth or egg hatching	0.00621501	6	CNS	AGO2; cin; faf; pcm
GO:0044260	0.00475181	2.56767	10.2408	18	3639	cellular macromolecule metabolic process	0.00643884	6	CNS	AGO2; Arf79F; brm; Cam; CG31368; CG3605; CG3689; cin; Dref; faf; gro; kis; lid; pcm; Tl; Ulp1; wds; woc
GO:0010468	0.00481345	3.27053	3.36576	9	1196	regulation of gene expression	0.00645093	6	CNS	AGO2; brm; Dref; gro; kis; Lis-1; pcm; Tl; woc
GO:0031348	0.00481707	21.4147	0.104125	2	37	negative regulation of defense response	0.00645093	6	CNS	faf; Ulp1
GO:0006325	0.00486653	5.07953	1.12286	5	399	chromatin organization	0.00647927	6	CNS	AGO2; brm; HmgD; lid; wds
GO:0007049	0.0049636	3.48812	2.75509	8	979	cell cycle	0.00657032	6	CNS	brm; Cam; Dref; gammaTub37C; Lis-1; pav; Tl; wds
GO:0009798	0.00504338	6.40263	0.700732	4	249	axis specification	0.00660423	6	CNS	faf; gammaTub37C; Lis-1; Tl
GO:0046822	0.00507574	20.8182	0.106939	2	38	regulation of nucleocytoplasmic transport	0.00660423	6	CNS	Cam; pav
GO:0051222	0.00507574	20.8182	0.106939	2	38	positive regulation of protein transport	0.00660423	6	CNS	Cam; pav
GO:0007411	0.0054848	6.2465	0.717617	4	255	axon guidance	0.00709615	6	CNS	Cam; kis; Lis-1; ras
GO:0019915	0.0056119	19.7193	0.112567	2	40	lipid storage	0.00721981	6	CNS	Arf79F; CG9186
GO:0007166	0.0057023	4.16437	1.66881	6	593	cell surface receptor signaling pathway	0.00723875	6	CNS	brm; gro; Lis-1; pav; Tl; Ulp1
GO:0061061	0.00571495	6.1712	0.726059	4	258	muscle structure development	0.00723875	6	CNS	brm; HmgD; lid; pav
GO:0051297	0.00572146	9.06127	0.365844	3	130	centrosome organization	0.00723875	6	CNS	Cam; Lis-1; pav
GO:1901360	0.00584696	2.69539	6.31221	13	2243	organic cyclic compound metabolic process	0.00735689	6	CNS	AGO2; brm; CG31368; CG3605; CG3689; cin; Dref; gro; kis; pcm; ras; Tl; woc
GO:0006886	0.00595151	6.09765	0.734502	4	261	intracellular protein transport	0.00742859	6	CNS	Cam; Lis-1; pav; Trp1
GO:0032101	0.00596883	8.91933	0.371472	3	132	regulation of response to external stimulus	0.00742859	6	CNS	Cam; Tl; Ulp1
GO:0050776	0.00609489	8.85	0.374286	3	133	regulation of immune response	0.00754211	6	CNS	brm; faf; Tl
GO:0080090	0.00612591	2.97699	4.16218	10	1479	regulation of primary metabolic process	0.00754211	6	CNS	AGO2; brm; Dref; faf; gro; kis; Lis-1; Tl; wds; woc
GO:0042386	0.00617291	18.7303	0.118196	2	42	hemocyte differentiation	0.0075587	6	CNS	Tl; Ulp1
GO:0090304	0.00620539	2.84646	4.87135	11	1731	nucleic acid metabolic process	0.0075587	6	CNS	AGO2; brm; CG31368; CG3605; CG3689; Dref; gro; kis; pcm; Tl; woc
GO:0070727	0.00634172	4.75476	1.19603	5	425	cellular macromolecule localization	0.0076155	6	CNS	Cam; CG6404; Lis-1; pav; Trp1
GO:0019222	0.00634346	2.83688	4.88542	11	1736	regulation of metabolic process	0.0076155	6	CNS	AGO2; brm; Dref; faf; gro; kis; Lis-1; pcm; Tl; wds; woc
GO:0031023	0.00635179	8.71449	0.379915	3	135	microtubule organizing center organization	0.0076155	6	CNS	Cam; Lis-1; pav
GO:0051234	0.00645569	2.82926	4.89668	11	1740	establishment of localization	0.00766812	6	CNS	AGO2; Arf79F; brm; Cam; CG32103; CG6404; faf; Lis-1; pav; ras; Trp1
GO:0042052	0.00646265	18.272	0.12101	2	43	rhabdomere development	0.00766812	6	CNS	Cam; Lis-1
GO:0048749	0.00653021	4.71986	1.20447	5	428	compound eye development	0.00770834	6	CNS	Arf79F; Cam; Dref; faf; Lis-1
GO:0051252	0.0065787	3.3134	2.88735	8	1026	regulation of RNA metabolic process	0.00772576	6	CNS	AGO2; brm; Dref; gro; kis; Lis-1; Tl; woc
GO:0000226	0.00672264	4.68545	1.21291	5	431	microtubule cytoskeleton organization	0.00777737	6	CNS	Cam; Dref; gammaTub37C; Lis-1; pav
GO:0007276	0.00673288	3.29927	2.89861	8	1030	gamete generation	0.00777737	6	CNS	AGO2; brm; faf; gammaTub37C; kis; Lis-1; pcm; ras
GO:0045786	0.00674918	8.51875	0.388357	3	138	negative regulation of cell cycle	0.00777737	6	CNS	brm; Lis-1; wds
GO:0090150	0.0067585	17.8355	0.123824	2	44	establishment of protein localization to membrane	0.00777737	6	CNS	CG6404; Trp1
GO:0022414	0.00724753	3.05021	3.58246	9	1273	reproductive process	0.00829842	6	CNS	AGO2; brm; faf; gammaTub37C; gro; kis; Lis-1; pcm; ras
GO:0072594	0.0073017	8.27091	0.399614	3	142	establishment of protein localization to organelle	0.00831886	6	CNS	Cam; pav; Trp1
GO:2000112	0.00737758	3.24385	2.94364	8	1046	regulation of cellular macromolecule biosynthetic process	0.00836369	6	CNS	AGO2; brm; Dref; gro; kis; Lis-1; Tl; woc
GO:0010556	0.00746138	3.23704	2.94926	8	1048	regulation of macromolecule biosynthetic process	0.00841703	6	CNS	AGO2; brm; Dref; gro; kis; Lis-1; Tl; woc
GO:0031323	0.00756694	2.87662	4.28882	10	1524	regulation of cellular metabolic process	0.00849427	6	CNS	AGO2; brm; Dref; faf; gro; kis; Lis-1; Tl; wds; woc
GO:0006139	0.0076785	2.66418	5.74938	12	2043	nucleobase-containing compound metabolic process	0.00857744	6	CNS	AGO2; brm; CG31368; CG3605; CG3689; Dref; gro; kis; pcm; ras; Tl; woc
GO:0016482	0.00788932	5.60666	0.796414	4	283	cytoplasmic transport	0.00877017	6	CNS	Cam; Lis-1; pav; Trp1
GO:0035172	0.00800229	16.2793	0.135081	2	48	hemocyte proliferation	0.00885277	6	CNS	brm; Tl
GO:0008063	0.00832816	15.9317	0.137895	2	49	Toll signaling pathway	0.00900147	6	CNS	Tl; Ulp1
GO:0016441	0.00832816	15.9317	0.137895	2	49	posttranscriptional gene silencing	0.00900147	6	CNS	AGO2; pcm
GO:0035194	0.00832816	15.9317	0.137895	2	49	posttranscriptional gene silencing by RNA	0.00900147	6	CNS	AGO2; pcm
GO:0090307	0.00832816	15.9317	0.137895	2	49	mitotic spindle assembly	0.00900147	6	CNS	Cam; pav
GO:0001654	0.00833324	4.4369	1.27764	5	454	eye development	0.00900147	6	CNS	Arf79F; Cam; Dref; faf; Lis-1
GO:0010623	0.00864108	7.76225	0.424942	3	151	developmental programmed cell death	0.00922384	6	CNS	AGO2; Cam; Ect3
GO:0007310	0.00865994	15.5985	0.140709	2	50	oocyte dorsal/ventral axis specification	0.00922384	6	CNS	gammaTub37C; Lis-1
GO:0033157	0.00865994	15.5985	0.140709	2	50	regulation of intracellular protein transport	0.00922384	6	CNS	Cam; pav
GO:0009790	0.00876679	3.78366	1.82641	6	649	embryo development	0.00928199	6	CNS	AGO2; cin; faf; kis; pcm; Tl
GO:0019219	0.00880819	3.13797	3.03369	8	1078	regulation of nucleobase-containing compound metabolic process	0.00928199	6	CNS	AGO2; brm; Dref; gro; kis; Lis-1; Tl; woc
GO:0006955	0.00889345	5.40819	0.824556	4	293	immune response	0.00928199	6	CNS	brm; faf; kis; Tl
GO:0016569	0.00895706	7.6575	0.43057	3	153	covalent chromatin modification	0.00928199	6	CNS	brm; lid; wds
GO:0016570	0.00895706	7.6575	0.43057	3	153	histone modification	0.00928199	6	CNS	brm; lid; wds
GO:1902850	0.00899759	15.2789	0.143523	2	51	microtubule cytoskeleton organization involved in mitosis	0.00928199	6	CNS	Cam; pav
GO:0034622	0.00899826	5.3891	0.82737	4	294	cellular macromolecular complex assembly	0.00928199	6	CNS	AGO2; CG6404; gammaTub37C; pcm
GO:0006605	0.00927977	7.55551	0.436198	3	155	protein targeting	0.00952945	6	CNS	Cam; pav; Trp1
GO:0022618	0.00934107	14.9721	0.146338	2	52	ribonucleoprotein complex assembly	0.00954957	6	CNS	AGO2; pcm
GO:0032886	0.00969035	14.6774	0.149152	2	53	regulation of microtubule-based process	0.00981898	6	CNS	Lis-1; pav
GO:1903649	0.00969035	14.6774	0.149152	2	53	regulation of cytoplasmic transport	0.00981898	6	CNS	Cam; pav
GO:0045087	0.00977653	7.40746	0.444641	3	158	innate immune response	0.00986267	6	CNS	brm; faf; Tl
GO:0031326	0.00996043	3.0657	3.09842	8	1101	regulation of cellular biosynthetic process	0.00997834	6	CNS	AGO2; brm; Dref; gro; kis; Lis-1; Tl; woc
GO:0048585	0.00997834	5.223	0.852698	4	303	negative regulation of response to stimulus	0.00997834	6	CNS	Cam; faf; gro; Ulp1
GO:0006260	5.57059e-08	37.7528	0.213878	6	95	DNA replication	4.84641e-06	7	CNS	dpa; dre4; Mcm2; Mcm7; RnrL; Top2
GO:0006261	2.98647e-07	44.7428	0.146338	5	65	DNA-dependent DNA replication	1.29911e-05	7	CNS	dpa; dre4; Mcm2; Mcm7; Top2
GO:0043933	5.66226e-06	7.39033	2.27386	11	1010	macromolecular complex subunit organization	0.000147995	7	CNS	B52; Df31; dpa; dre4; His2Av; Mcm2; Mcm7; polo; smt3; Ssrp; Top2
GO:0006270	6.80438e-06	106.243	0.0382729	3	17	DNA replication initiation	0.000147995	7	CNS	dpa; Mcm2; Mcm7
GO:0006259	3.18863e-05	11.9891	0.63488	6	282	DNA metabolic process	0.00049443	7	CNS	dpa; dre4; Mcm2; Mcm7; RnrL; Top2
GO:0090304	3.40986e-05	5.39321	3.89708	13	1731	nucleic acid metabolic process	0.00049443	7	CNS	Aats-ala; Aats-gln; B52; CG14786; dpa; dre4; lig; Mcm2; Mcm7; Nop60B; RnrL; RpII215; Top2
GO:0071840	8.82243e-05	4.54005	6.37807	16	2833	cellular component organization or biogenesis	0.000886821	7	CNS	Aats-gln; B52; CG14786; Df31; dpa; dre4; Fas1; His2Av; Mcm2; Mcm7; Nop60B; Nrt; polo; smt3; Ssrp; Top2
GO:0006267	0.000101933	190.831	0.0157594	2	7	pre-replicative complex assembly involved in nuclear cell cycle DNA replication	0.000886821	7	CNS	Mcm2; Mcm7
GO:0036388	0.000101933	190.831	0.0157594	2	7	pre-replicative complex assembly	0.000886821	7	CNS	Mcm2; Mcm7
GO:1902299	0.000101933	190.831	0.0157594	2	7	pre-replicative complex assembly involved in cell cycle DNA replication	0.000886821	7	CNS	Mcm2; Mcm7
GO:0033260	0.000135722	159.013	0.0180108	2	8	nuclear DNA replication	0.00107344	7	CNS	Mcm2; Mcm7
GO:1903047	0.000163625	7.31238	1.23374	7	548	mitotic cell cycle process	0.00118628	7	CNS	B52; dpa; Mcm7; polo; RpII215; smt3; Top2
GO:0006139	0.0001983	4.4311	4.5995	13	2043	nucleobase-containing compound metabolic process	0.00132709	7	CNS	Aats-ala; Aats-gln; B52; CG14786; dpa; dre4; lig; Mcm2; Mcm7; Nop60B; RnrL; RpII215; Top2
GO:0044249	0.000274194	4.15324	5.45276	14	2422	cellular biosynthetic process	0.00144362	7	CNS	Aats-ala; Aats-gln; B52; CG14786; Cnx99A; dpa; dre4; Fpps; lig; Mcm2; Mcm7; RnrL; RpII215; Top2
GO:0071103	0.000284318	14.606	0.324194	4	144	DNA conformation change	0.00144362	7	CNS	Df31; dre4; Mcm2; Top2
GO:0016043	0.000291718	4.04894	6.22948	15	2767	cellular component organization	0.00144362	7	CNS	Aats-gln; B52; CG14786; Df31; dpa; dre4; Fas1; His2Av; Mcm2; Mcm7; Nrt; polo; smt3; Ssrp; Top2
GO:0046483	0.000310842	4.2038	4.80437	13	2134	heterocycle metabolic process	0.00144362	7	CNS	Aats-ala; Aats-gln; B52; CG14786; dpa; dre4; lig; Mcm2; Mcm7; Nop60B; RnrL; RpII215; Top2
GO:0001672	0.000318137	95.3769	0.0270162	2	12	regulation of chromatin assembly or disassembly	0.00144362	7	CNS	dre4; Ssrp
GO:0006333	0.000367214	13.6211	0.346707	4	154	chromatin assembly or disassembly	0.00144362	7	CNS	Df31; dre4; His2Av; Ssrp
GO:0022402	0.000367725	5.6092	1.87762	8	834	cell cycle process	0.00144362	7	CNS	B52; dpa; Mcm2; Mcm7; polo; RpII215; smt3; Top2
GO:0006725	0.000368782	4.11918	4.88542	13	2170	cellular aromatic compound metabolic process	0.00144362	7	CNS	Aats-ala; Aats-gln; B52; CG14786; dpa; dre4; lig; Mcm2; Mcm7; Nop60B; RnrL; RpII215; Top2
GO:0009058	0.000380948	3.9996	5.61936	14	2496	biosynthetic process	0.00144362	7	CNS	Aats-ala; Aats-gln; B52; CG14786; Cnx99A; dpa; dre4; Fpps; lig; Mcm2; Mcm7; RnrL; RpII215; Top2
GO:0000278	0.000381646	6.31672	1.4161	7	629	mitotic cell cycle	0.00144362	7	CNS	B52; dpa; Mcm7; polo; RpII215; smt3; Top2
GO:0034622	0.000448576	9.11689	0.661896	5	294	cellular macromolecular complex assembly	0.00162609	7	CNS	B52; Df31; Mcm2; Mcm7; polo
GO:0044763	0.000499227	4.26425	12.9655	22	5759	single-organism cellular process	0.00163817	7	CNS	Aats-ala; Aats-gln; B52; CG14786; CG4972; Cnx99A; dpa; dre4; Fas1; Fpps; lig; Mcm2; Mcm7; Nop60B; Nrt; polo; RnrL; RpII215; Sap-r; smt3; Ssrp; Top2
GO:1901360	0.000515675	3.95596	5.04977	13	2243	organic cyclic compound metabolic process	0.00163817	7	CNS	Aats-ala; Aats-gln; B52; CG14786; dpa; dre4; lig; Mcm2; Mcm7; Nop60B; RnrL; RpII215; Top2
GO:0007095	0.000527226	21.7782	0.159846	3	71	mitotic G2 DNA damage checkpoint	0.00163817	7	CNS	Mcm7; RpII215; Top2
GO:0031572	0.000527226	21.7782	0.159846	3	71	G2 DNA damage checkpoint	0.00163817	7	CNS	Mcm7; RpII215; Top2
GO:0044818	0.000549321	21.4609	0.162097	3	72	mitotic G2/M transition checkpoint	0.00164796	7	CNS	Mcm7; RpII215; Top2
GO:0010972	0.000619145	20.5617	0.168851	3	75	negative regulation of G2/M transition of mitotic cell cycle	0.00173589	7	CNS	Mcm7; RpII215; Top2
GO:1902750	0.000619145	20.5617	0.168851	3	75	negative regulation of cell cycle G2/M phase transition	0.00173589	7	CNS	Mcm7; RpII215; Top2
GO:0044238	0.000667554	3.80795	11.1172	20	4938	primary metabolic process	0.00173589	7	CNS	Aats-ala; Aats-gln; ApepP; B52; CG14786; CG5355; Cnx99A; dpa; dre4; Fpps; lig; Mcm2; Mcm7; Nop60B; polo; RnrL; RpII215; Sap-r; smt3; Top2
GO:0034645	0.00067276	3.95275	4.48243	12	1991	cellular macromolecule biosynthetic process	0.00173589	7	CNS	Aats-ala; Aats-gln; B52; CG14786; dpa; dre4; lig; Mcm2; Mcm7; RnrL; RpII215; Top2
GO:0044773	0.000694408	19.7344	0.175605	3	78	mitotic DNA damage checkpoint	0.00173589	7	CNS	Mcm7; RpII215; Top2
GO:0009059	0.000698348	3.93382	4.50044	12	1999	macromolecule biosynthetic process	0.00173589	7	CNS	Aats-ala; Aats-gln; B52; CG14786; dpa; dre4; lig; Mcm2; Mcm7; RnrL; RpII215; Top2
GO:0044774	0.000720734	19.4732	0.177856	3	79	mitotic DNA integrity checkpoint	0.00174177	7	CNS	Mcm7; RpII215; Top2
GO:0010389	0.000803509	18.7291	0.18461	3	82	regulation of G2/M transition of mitotic cell cycle	0.00183961	7	CNS	Mcm7; RpII215; Top2
GO:1902749	0.000803509	18.7291	0.18461	3	82	regulation of cell cycle G2/M phase transition	0.00183961	7	CNS	Mcm7; RpII215; Top2
GO:0000077	0.000922965	17.8207	0.193616	3	86	DNA damage checkpoint	0.00205892	7	CNS	Mcm7; RpII215; Top2
GO:0000086	0.00101958	17.1949	0.20037	3	89	G2/M transition of mitotic cell cycle	0.0021635	7	CNS	Mcm7; RpII215; Top2
GO:0031570	0.00101958	17.1949	0.20037	3	89	DNA integrity checkpoint	0.0021635	7	CNS	Mcm7; RpII215; Top2
GO:0007049	0.0010719	4.71184	2.20407	8	979	cell cycle	0.00222037	7	CNS	B52; dpa; Mcm2; Mcm7; polo; RpII215; smt3; Top2
GO:0065004	0.00112238	16.6112	0.207124	3	92	protein-DNA complex assembly	0.00227087	7	CNS	Df31; Mcm2; Mcm7
GO:1901576	0.00117952	3.56816	5.48878	13	2438	organic substance biosynthetic process	0.00227403	7	CNS	Aats-ala; Aats-gln; B52; CG14786; dpa; dre4; Fpps; lig; Mcm2; Mcm7; RnrL; RpII215; Top2
GO:0044839	0.00119443	16.2435	0.211627	3	94	cell cycle G2/M phase transition	0.00227403	7	CNS	Mcm7; RpII215; Top2
GO:0043170	0.00120236	3.43586	9.64477	18	4284	macromolecule metabolic process	0.00227403	7	CNS	Aats-ala; Aats-gln; ApepP; B52; CG14786; CG5355; Cnx99A; dpa; dre4; lig; Mcm2; Mcm7; Nop60B; polo; RnrL; RpII215; smt3; Top2
GO:0007093	0.00123153	16.0657	0.213878	3	95	mitotic cell cycle checkpoint	0.00227964	7	CNS	Mcm7; RpII215; Top2
GO:0044711	0.00127276	5.86933	1.254	6	557	single-organism biosynthetic process	0.00228932	7	CNS	CG14786; Cnx99A; Fpps; Mcm2; Mcm7; RnrL
GO:0006996	0.00128939	3.76953	4.11771	11	1829	organelle organization	0.00228932	7	CNS	B52; CG14786; Df31; dpa; dre4; His2Av; Mcm2; polo; smt3; Ssrp; Top2
GO:0007052	0.00142114	9.36406	0.497548	4	221	mitotic spindle organization	0.00247279	7	CNS	dpa; polo; smt3; Top2
GO:1901988	0.00151168	14.9212	0.229637	3	102	negative regulation of cell cycle phase transition	0.00252916	7	CNS	Mcm7; RpII215; Top2
GO:1901991	0.00151168	14.9212	0.229637	3	102	negative regulation of mitotic cell cycle phase transition	0.00252916	7	CNS	Mcm7; RpII215; Top2
GO:0051276	0.00160943	5.59256	1.31254	6	583	chromosome organization	0.00264189	7	CNS	Df31; dre4; His2Av; Mcm2; Ssrp; Top2
GO:0000075	0.00173442	14.1981	0.240894	3	107	cell cycle checkpoint	0.00279434	7	CNS	Mcm7; RpII215; Top2
GO:0044786	0.00178192	36.6361	0.0630377	2	28	cell cycle DNA replication	0.00281868	7	CNS	Mcm2; Mcm7
GO:0044260	0.00188853	3.23342	8.19265	16	3639	cellular macromolecule metabolic process	0.00290541	7	CNS	Aats-ala; Aats-gln; B52; CG14786; Cnx99A; dpa; dre4; lig; Mcm2; Mcm7; Nop60B; polo; RnrL; RpII215; smt3; Top2
GO:0010948	0.00192667	13.6678	0.249899	3	111	negative regulation of cell cycle process	0.00290541	7	CNS	Mcm7; RpII215; Top2
GO:0071704	0.00193694	3.37325	11.9366	20	5302	organic substance metabolic process	0.00290541	7	CNS	Aats-ala; Aats-gln; ApepP; B52; CG14786; CG5355; Cnx99A; dpa; dre4; Fpps; lig; Mcm2; Mcm7; Nop60B; polo; RnrL; RpII215; Sap-r; smt3; Top2
GO:0045930	0.00213175	13.1754	0.258905	3	115	negative regulation of mitotic cell cycle	0.00314342	7	CNS	Mcm7; RpII215; Top2
GO:0065003	0.00228701	6.23622	0.95232	5	423	macromolecular complex assembly	0.00331616	7	CNS	B52; Df31; Mcm2; Mcm7; polo
GO:0007051	0.00250283	7.97572	0.580847	4	258	spindle organization	0.00356961	7	CNS	dpa; polo; smt3; Top2
GO:0008152	0.00285122	3.32682	13.2942	21	5905	metabolic process	0.00399151	7	CNS	Aats-ala; Aats-gln; ApepP; B52; CG14786; CG5355; CG8778; Cnx99A; dpa; dre4; Fpps; lig; Mcm2; Mcm7; Nop60B; polo; RnrL; RpII215; Sap-r; smt3; Top2
GO:0071824	0.00289041	11.7926	0.288172	3	128	protein-DNA complex subunit organization	0.00399151	7	CNS	Df31; Mcm2; Mcm7
GO:0022008	0.00302691	3.67448	3.21042	9	1426	neurogenesis	0.00411471	7	CNS	Aats-gln; dre4; Fas1; Mcm2; Nop60B; Nrt; polo; smt3; Ssrp
GO:0071822	0.00308479	4.87837	1.49264	6	663	protein complex subunit organization	0.00412887	7	CNS	B52; Df31; dpa; polo; smt3; Top2
GO:0006323	0.00315322	11.4233	0.297178	3	132	DNA packaging	0.00415652	7	CNS	Df31; Mcm2; Top2
GO:0006418	0.00326826	26.438	0.0855512	2	38	tRNA aminoacylation for protein translation	0.00424386	7	CNS	Aats-ala; Aats-gln
GO:0043039	0.00344014	25.7214	0.0878025	2	39	tRNA aminoacylation	0.00439957	7	CNS	Aats-ala; Aats-gln
GO:0044237	0.00348932	3.02215	10.4688	18	4650	cellular metabolic process	0.00439957	7	CNS	Aats-ala; Aats-gln; B52; CG14786; Cnx99A; dpa; dre4; Fpps; lig; Mcm2; Mcm7; Nop60B; polo; RnrL; RpII215; Sap-r; smt3; Top2
GO:0045786	0.00357432	10.9102	0.310686	3	138	negative regulation of cell cycle	0.00443108	7	CNS	Mcm7; RpII215; Top2
GO:0043038	0.00361617	25.0425	0.0900539	2	40	amino acid activation	0.00443108	7	CNS	Aats-ala; Aats-gln
GO:0044710	0.00373601	3.23186	4.68505	11	2081	single-organism metabolic process	0.00451435	7	CNS	Aats-ala; Aats-gln; CG14786; Cnx99A; Fpps; Mcm2; Mcm7; RnrL; Sap-r; smt3; Top2
GO:1901987	0.00395038	10.5163	0.321943	3	143	regulation of cell cycle phase transition	0.00464408	7	CNS	Mcm7; RpII215; Top2
GO:1901990	0.00395038	10.5163	0.321943	3	143	regulation of mitotic cell cycle phase transition	0.00464408	7	CNS	Mcm7; RpII215; Top2
GO:0006974	0.00400352	6.96494	0.661896	4	294	cellular response to DNA damage stimulus	0.00464408	7	CNS	His2Av; Mcm7; RpII215; Top2
GO:0006807	0.00437716	2.94563	7.112	14	3159	nitrogen compound metabolic process	0.0050107	7	CNS	Aats-ala; Aats-gln; B52; CG14786; dpa; dre4; lig; Mcm2; Mcm7; Nop60B; RnrL; RpII215; Sap-r; Top2
GO:0030261	0.004558	22.1216	0.101311	2	45	chromosome condensation	0.00514995	7	CNS	Mcm2; Top2
GO:0016070	0.00484662	3.39593	3.44006	9	1528	RNA metabolic process	0.00540585	7	CNS	Aats-ala; Aats-gln; B52; CG14786; dre4; lig; Nop60B; RpII215; Top2
GO:0044772	0.00531284	9.42538	0.357964	3	159	mitotic cell cycle phase transition	0.00585085	7	CNS	Mcm7; RpII215; Top2
GO:0009987	0.00551226	3.7135	17.3106	24	7689	cellular process	0.00599459	7	CNS	Aats-ala; Aats-gln; B52; CG14786; CG4972; Cnx99A; Df31; dpa; dre4; Fas1; Fpps; His2Av; lig; Mcm2; Mcm7; Nop60B; Nrt; polo; RnrL; RpII215; Sap-r; smt3; Ssrp; Top2
GO:0044770	0.00569241	9.18675	0.36697	3	163	cell cycle phase transition	0.00611407	7	CNS	Mcm7; RpII215; Top2
GO:0034641	0.00580877	2.87402	6.50189	13	2888	cellular nitrogen compound metabolic process	0.00616296	7	CNS	Aats-ala; Aats-gln; B52; CG14786; dpa; dre4; lig; Mcm2; Mcm7; Nop60B; RnrL; RpII215; Top2
GO:0044085	0.00639256	3.73386	2.30538	7	1024	cellular component biogenesis	0.00670063	7	CNS	B52; Df31; Mcm2; Mcm7; Nop60B; polo; smt3
GO:0034660	0.00649968	8.74357	0.38498	3	171	ncRNA metabolic process	0.00673181	7	CNS	Aats-ala; Aats-gln; Nop60B
GO:0007399	0.00809755	3.10606	3.71697	9	1651	nervous system development	0.00828809	7	CNS	Aats-gln; dre4; Fas1; Mcm2; Nop60B; Nrt; polo; smt3; Ssrp
GO:0050794	0.00862717	2.711	6.79682	13	3019	regulation of cellular process	0.00872749	7	CNS	B52; CG14786; CG4972; Cnx99A; dre4; lig; Mcm7; polo; RnrL; RpII215; smt3; Ssrp; Top2
GO:0033554	0.00911303	4.42565	1.31929	5	586	cellular response to stress	0.00911303	7	CNS	His2Av; Mcm7; Nop60B; RpII215; Top2
GO:0006457	1.11558e-05	122.079	0.0501729	3	104	protein folding	0.000602412	8	CNS	Hsc70-4; Hsp27; Hsp83
GO:0006950	3.55849e-05	49.7621	0.549972	5	1140	response to stress	0.000960793	8	CNS	Hsc70-4; Hsp27; Hsp83; RpS3; sesB
GO:0009628	0.00069402	29.0266	0.201174	3	417	response to abiotic stimulus	0.00938866	8	CNS	Hsp27; Hsp83; sesB
GO:0009408	0.000712499	72.6235	0.0419715	2	87	response to heat	0.00938866	8	CNS	Hsp27; Hsp83
GO:0048519	0.00123154	18.1966	0.595803	4	1235	negative regulation of biological process	0.00938866	8	CNS	Hsc70-4; Hsp83; RpS3; sesB
GO:0009266	0.00160645	47.6822	0.0631985	2	131	response to temperature stimulus	0.00938866	8	CNS	Hsp27; Hsp83
GO:0033554	0.00187036	20.3225	0.282705	3	586	cellular response to stress	0.00938866	8	CNS	Hsc70-4; RpS3; sesB
GO:0019538	0.00214592	18.5346	1.27651	5	2646	protein metabolic process	0.00938866	8	CNS	Cp1; Hsc70-4; Hsp27; Hsp83; RpS3
GO:0008340	0.00238483	38.8386	0.077189	2	160	determination of adult lifespan	0.00938866	8	CNS	Hsp27; sesB
GO:0010259	0.00247378	38.1056	0.0786363	2	163	multicellular organismal aging	0.00938866	8	CNS	Hsp27; sesB
GO:0007568	0.00259483	37.1697	0.0805661	2	167	aging	0.00938866	8	CNS	Hsp27; sesB
GO:0050896	0.00282672	17.2141	1.35226	5	2803	response to stimulus	0.00938866	8	CNS	Hsc70-4; Hsp27; Hsp83; RpS3; sesB
GO:0042595	0.00289168	497.04	0.00289459	1	6	behavioral response to starvation	0.00938866	8	CNS	Hsp27
GO:0051881	0.00289168	497.04	0.00289459	1	6	regulation of mitochondrial membrane potential	0.00938866	8	CNS	sesB
GO:0009118	0.00337295	414.167	0.00337702	1	7	regulation of nucleoside metabolic process	0.00938866	8	CNS	sesB
GO:1903578	0.00337295	414.167	0.00337702	1	7	regulation of ATP metabolic process	0.00938866	8	CNS	sesB
GO:0048468	0.00379044	13.0133	0.800836	4	1660	cell development	0.00938866	8	CNS	Cp1; Hsc70-4; Hsp83; sesB
GO:0009631	0.00385402	354.971	0.00385945	1	8	cold acclimation	0.00938866	8	CNS	Hsp83
GO:0015858	0.00385402	354.971	0.00385945	1	8	nucleoside transport	0.00938866	8	CNS	sesB
GO:0042026	0.00385402	354.971	0.00385945	1	8	protein refolding	0.00938866	8	CNS	Hsp27
GO:0043248	0.00385402	354.971	0.00385945	1	8	proteasome assembly	0.00938866	8	CNS	Hsp83
GO:0044238	0.00391036	Inf	2.38225	6	4938	primary metabolic process	0.00938866	8	CNS	Cp1; Hsc70-4; Hsp27; Hsp83; RpS3; sesB
GO:0006862	0.00433491	310.575	0.00434188	1	9	nucleotide transport	0.00938866	8	CNS	sesB
GO:2000021	0.00433491	310.575	0.00434188	1	9	regulation of ion homeostasis	0.00938866	8	CNS	sesB
GO:0051716	0.0051585	11.8276	0.869341	4	1802	cellular response to stimulus	0.00938866	8	CNS	Hsc70-4; Hsp83; RpS3; sesB
GO:0032844	0.00529609	248.42	0.00530675	1	11	regulation of homeostatic process	0.00938866	8	CNS	sesB
GO:0009409	0.00577639	225.818	0.00578918	1	12	response to cold	0.00938866	8	CNS	Hsp83
GO:0051480	0.00577639	225.818	0.00578918	1	12	cytosolic calcium ion homeostasis	0.00938866	8	CNS	sesB
GO:0071704	0.00599293	Inf	2.55785	6	5302	organic substance metabolic process	0.00938866	8	CNS	Cp1; Hsc70-4; Hsp27; Hsp83; RpS3; sesB
GO:0007268	0.00627068	23.4058	0.126397	2	262	synaptic transmission	0.00938866	8	CNS	Hsc70-4; sesB
GO:0051641	0.00649964	12.7816	0.4366	3	905	cellular localization	0.00938866	8	CNS	Hsc70-4; Hsp83; sesB
GO:0030810	0.00673641	191.046	0.00675404	1	14	positive regulation of nucleotide biosynthetic process	0.00938866	8	CNS	sesB
GO:0035967	0.00673641	191.046	0.00675404	1	14	cellular response to topologically incorrect protein	0.00938866	8	CNS	Hsc70-4
GO:0070050	0.00673641	191.046	0.00675404	1	14	neuron cellular homeostasis	0.00938866	8	CNS	sesB
GO:1900373	0.00673641	191.046	0.00675404	1	14	positive regulation of purine nucleotide biosynthetic process	0.00938866	8	CNS	sesB
GO:0035966	0.00721613	177.386	0.00723647	1	15	response to topologically incorrect protein	0.00938866	8	CNS	Hsc70-4
GO:0045981	0.00721613	177.386	0.00723647	1	15	positive regulation of nucleotide metabolic process	0.00938866	8	CNS	sesB
GO:1900544	0.00721613	177.386	0.00723647	1	15	positive regulation of purine nucleotide metabolic process	0.00938866	8	CNS	sesB
GO:1901264	0.00721613	177.386	0.00723647	1	15	carbohydrate derivative transport	0.00938866	8	CNS	sesB
GO:0009605	0.00758899	12.0441	0.461204	3	956	response to external stimulus	0.00938866	8	CNS	Hsc70-4; Hsp27; sesB
GO:0070887	0.00805307	20.4983	0.143765	2	298	cellular response to chemical stimulus	0.00938866	8	CNS	Hsc70-4; sesB
GO:0010529	0.008175	155.188	0.00820133	1	17	negative regulation of transposition	0.00938866	8	CNS	Hsp83
GO:0043524	0.008175	155.188	0.00820133	1	17	negative regulation of neuron apoptotic process	0.00938866	8	CNS	RpS3
GO:0006139	0.0082316	10.1932	0.985607	4	2043	nucleobase-containing compound metabolic process	0.00938866	8	CNS	Hsc70-4; Hsp83; RpS3; sesB
GO:0048856	0.00842357	12.6326	1.70298	5	3530	anatomical structure development	0.00938866	8	CNS	Cp1; Hsc70-4; Hsp27; Hsp83; sesB
GO:0010528	0.00865414	146.047	0.00868377	1	18	regulation of transposition	0.00938866	8	CNS	Hsp83
GO:0015748	0.00865414	146.047	0.00868377	1	18	organophosphate ester transport	0.00938866	8	CNS	sesB
GO:0030808	0.00865414	146.047	0.00868377	1	18	regulation of nucleotide biosynthetic process	0.00938866	8	CNS	sesB
GO:1900371	0.00865414	146.047	0.00868377	1	18	regulation of purine nucleotide biosynthetic process	0.00938866	8	CNS	sesB
GO:0012501	0.0086932	19.6802	0.149554	2	310	programmed cell death	0.00938866	8	CNS	Cp1; RpS3
GO:0032196	0.00913309	137.922	0.0091662	1	19	transposition	0.00966969	8	CNS	Hsp83
GO:0010507	0.00961185	130.653	0.00964863	1	20	negative regulation of autophagy	0.00966969	8	CNS	sesB
GO:0043523	0.00961185	130.653	0.00964863	1	20	regulation of neuron apoptotic process	0.00966969	8	CNS	RpS3
GO:0046483	0.00966969	9.6723	1.02951	4	2134	heterocycle metabolic process	0.00966969	8	CNS	Hsc70-4; Hsp83; RpS3; sesB
GO:0007409	3.90437e-06	13.5715	0.69253	7	319	axonogenesis	0.000310113	9	CNS	brat; Dg; Lar; mfas; RhoGAPp190; Sema-1b; XNP
GO:0061564	4.88367e-06	13.0974	0.716411	7	330	axon development	0.000310113	9	CNS	brat; Dg; Lar; mfas; RhoGAPp190; Sema-1b; XNP
GO:0032989	1.11909e-05	7.52288	1.97556	10	910	cellular component morphogenesis	0.000334715	9	CNS	brat; Dg; Lar; Lasp; mfas; par-6; RhoGAPp190; Sema-1b; tkv; XNP
GO:0009653	1.20426e-05	5.90199	4.18775	14	1929	anatomical structure morphogenesis	0.000334715	9	CNS	brat; Cap-G; CLIP-190; Dg; Lar; Lasp; mfas; par-6; RhoGAPp190; sdk; Sema-1b; tkv; vlc; XNP
GO:0048468	1.31778e-05	6.06813	3.60376	13	1660	cell development	0.000334715	9	CNS	brat; Cap-G; Dg; l(3)01239; Lar; Lasp; mfas; par-6; RhoGAPp190; sdk; Sema-1b; tkv; XNP
GO:0000902	2.53292e-05	7.49613	1.70419	9	785	cell morphogenesis	0.000501581	9	CNS	brat; Dg; Lar; mfas; par-6; RhoGAPp190; Sema-1b; tkv; XNP
GO:0045595	2.76462e-05	12.3776	0.620889	6	286	regulation of cell differentiation	0.000501581	9	CNS	brat; Lar; Lasp; RhoGAPp190; sdk; tkv
GO:0048667	5.68198e-05	8.79421	1.04639	7	482	cell morphogenesis involved in neuron differentiation	0.000809803	9	CNS	brat; Dg; Lar; mfas; RhoGAPp190; Sema-1b; XNP
GO:0050793	5.73876e-05	7.53216	1.44368	8	665	regulation of developmental process	0.000809803	9	CNS	brat; Lar; Lasp; mfas; par-6; RhoGAPp190; sdk; tkv
GO:0048699	8.1189e-05	6.38679	1.97556	9	910	generation of neurons	0.0010311	9	CNS	brat; Dg; Lar; mfas; par-6; RhoGAPp190; sdk; Sema-1b; XNP
GO:0000904	0.000101031	7.98685	1.14626	7	528	cell morphogenesis involved in differentiation	0.00107513	9	CNS	brat; Dg; Lar; mfas; RhoGAPp190; Sema-1b; XNP
GO:0030030	0.000101587	6.90751	1.56525	8	721	cell projection organization	0.00107513	9	CNS	brat; Dg; Lar; mfas; par-6; RhoGAPp190; Sema-1b; XNP
GO:0060284	0.00013002	12.0891	0.508	5	234	regulation of cell development	0.0012487	9	CNS	brat; Lar; Lasp; RhoGAPp190; sdk
GO:0048477	0.000137652	6.59272	1.63472	8	753	oogenesis	0.0012487	9	CNS	brat; Cap-G; Dg; l(3)01239; Lar; Lasp; par-6; tkv
GO:0007292	0.000148167	6.51821	1.65209	8	761	female gamete generation	0.00125448	9	CNS	brat; Cap-G; Dg; l(3)01239; Lar; Lasp; par-6; tkv
GO:0048812	0.000164736	7.35124	1.23961	7	571	neuron projection morphogenesis	0.00130759	9	CNS	brat; Dg; Lar; mfas; RhoGAPp190; Sema-1b; XNP
GO:0007411	0.000194376	11.0545	0.55359	5	255	axon guidance	0.00139408	9	CNS	brat; Dg; Lar; Sema-1b; XNP
GO:0031175	0.000197586	7.1259	1.27651	7	588	neuron projection development	0.00139408	9	CNS	brat; Dg; Lar; mfas; RhoGAPp190; Sema-1b; XNP
GO:0097485	0.000224432	10.7047	0.570958	5	263	neuron projection guidance	0.0014505	9	CNS	brat; Dg; Lar; Sema-1b; XNP
GO:0051960	0.000228425	10.6625	0.573129	5	264	regulation of nervous system development	0.0014505	9	CNS	brat; Lar; RhoGAPp190; sdk; tkv
GO:0030182	0.000267631	5.94346	1.79971	8	829	neuron differentiation	0.00154999	9	CNS	brat; Dg; Lar; mfas; RhoGAPp190; sdk; Sema-1b; XNP
GO:0040011	0.000276579	6.7241	1.34815	7	621	locomotion	0.00154999	9	CNS	brat; Dg; Lar; par-6; Sema-1b; tkv; XNP
GO:0006935	0.000280707	10.1803	0.59918	5	276	chemotaxis	0.00154999	9	CNS	brat; Dg; Lar; Sema-1b; XNP
GO:0007416	0.000310002	14.3111	0.332154	4	153	synapse assembly	0.00156354	9	CNS	brat; Lar; par-6; tkv
GO:0048858	0.000313991	6.57743	1.37638	7	634	cell projection morphogenesis	0.00156354	9	CNS	brat; Dg; Lar; mfas; RhoGAPp190; Sema-1b; XNP
GO:0006928	0.000320094	6.55541	1.38072	7	636	movement of cell or subcellular component	0.00156354	9	CNS	brat; Dg; Lar; par-6; Sema-1b; tkv; XNP
GO:0032990	0.000338982	6.49016	1.39374	7	642	cell part morphogenesis	0.00159447	9	CNS	brat; Dg; Lar; mfas; RhoGAPp190; Sema-1b; XNP
GO:0007399	0.000368918	4.51486	3.58422	11	1651	nervous system development	0.0016464	9	CNS	brat; Cap-G; Dg; Lar; mfas; par-6; RhoGAPp190; sdk; Sema-1b; tkv; XNP
GO:0051239	0.00037595	6.37368	1.41762	7	653	regulation of multicellular organismal process	0.0016464	9	CNS	brat; Lar; Lasp; mfas; RhoGAPp190; sdk; tkv
GO:0007281	0.000389836	5.59884	1.90174	8	876	germ cell development	0.0016503	9	CNS	brat; Cap-G; Dg; l(3)01239; Lar; Lasp; par-6; tkv
GO:2000026	0.000405295	7.42236	1.01166	6	466	regulation of multicellular organismal development	0.0016604	9	CNS	brat; Lar; Lasp; RhoGAPp190; sdk; tkv
GO:0050767	0.000483498	12.6729	0.373402	4	172	regulation of neurogenesis	0.00191888	9	CNS	brat; Lar; RhoGAPp190; sdk
GO:0022008	0.000509691	4.56713	3.09576	10	1426	neurogenesis	0.00196154	9	CNS	brat; Cap-G; Dg; Lar; mfas; par-6; RhoGAPp190; sdk; Sema-1b; XNP
GO:0048666	0.000655514	5.77623	1.55439	7	716	neuron development	0.00244854	9	CNS	brat; Dg; Lar; mfas; RhoGAPp190; Sema-1b; XNP
GO:0006796	0.000696717	5.09665	2.07325	8	955	phosphate-containing compound metabolic process	0.00245894	9	CNS	CG8080; CG9286; Dg; Lar; par-6; PEK; tkv; XNP
GO:0030154	0.000710905	3.86094	5.25151	13	2419	cell differentiation	0.00245894	9	CNS	brat; Cap-G; Dg; l(3)01239; Lar; Lasp; mfas; par-6; RhoGAPp190; sdk; Sema-1b; tkv; XNP
GO:0022412	0.000716385	5.07344	2.08193	8	959	cellular process involved in reproduction in multicellular organism	0.00245894	9	CNS	brat; Cap-G; Dg; l(3)01239; Lar; Lasp; par-6; tkv
GO:0006793	0.000751895	5.03329	2.09713	8	966	phosphorus metabolic process	0.00247041	9	CNS	CG8080; CG9286; Dg; Lar; par-6; PEK; tkv; XNP
GO:0042330	0.00075863	8.11727	0.744633	5	343	taxis	0.00247041	9	CNS	brat; Dg; Lar; Sema-1b; XNP
GO:0044089	0.00080046	18.7927	0.18453	3	85	positive regulation of cellular component biogenesis	0.00250138	9	CNS	Lasp; par-6; tkv
GO:0048519	0.000815884	4.56117	2.68111	9	1235	negative regulation of biological process	0.00250138	9	CNS	brat; Dg; Lar; mfas; par-6; PEK; sdk; tkv; XNP
GO:0042221	0.000827228	4.95473	2.12752	8	980	response to chemical	0.00250138	9	CNS	brat; Dg; Lar; PEK; Sema-1b; Spn; tkv; XNP
GO:0042325	0.000884426	10.7264	0.43853	4	202	regulation of phosphorylation	0.00261214	9	CNS	CG9286; Dg; par-6; XNP
GO:0003006	0.000914653	4.87303	2.16009	8	995	developmental process involved in reproduction	0.00264002	9	CNS	brat; Cap-G; Dg; l(3)01239; Lar; Lasp; par-6; tkv
GO:0017145	0.000945239	17.7055	0.195385	3	90	stem cell division	0.00266768	9	CNS	brat; par-6; tkv
GO:0016310	0.00104856	6.13768	1.21139	6	558	phosphorylation	0.00287262	9	CNS	CG9286; Dg; par-6; PEK; tkv; XNP
GO:0048869	0.0010631	3.66982	5.4686	13	2519	cellular developmental process	0.00287262	9	CNS	brat; Cap-G; Dg; l(3)01239; Lar; Lasp; mfas; par-6; RhoGAPp190; sdk; Sema-1b; tkv; XNP
GO:0007276	0.00114811	4.69173	2.23607	8	1030	gamete generation	0.00299194	9	CNS	brat; Cap-G; Dg; l(3)01239; Lar; Lasp; par-6; tkv
GO:0050808	0.00115437	9.95877	0.471094	4	217	synapse organization	0.00299194	9	CNS	brat; Lar; par-6; tkv
GO:0031344	0.00128238	15.8673	0.217094	3	100	regulation of cell projection organization	0.00325724	9	CNS	Lar; par-6; RhoGAPp190
GO:0065008	0.00135103	4.56489	2.29251	8	1056	regulation of biological quality	0.00336434	9	CNS	brat; CG3408; Dg; Lar; Lasp; par-6; RhoGAPp190; tkv
GO:0006468	0.00142763	7.00466	0.857522	5	395	protein phosphorylation	0.00348672	9	CNS	CG9286; par-6; PEK; tkv; XNP
GO:0044087	0.00147772	9.29214	0.503658	4	232	regulation of cellular component biogenesis	0.00354094	9	CNS	brat; Lasp; par-6; tkv
GO:0045197	0.00154065	39.632	0.0586154	2	27	establishment or maintenance of epithelial cell apical/basal polarity	0.00362339	9	CNS	Dg; par-6
GO:0019220	0.00164839	9.01018	0.518855	4	239	regulation of phosphate metabolic process	0.00369179	9	CNS	CG9286; Dg; par-6; XNP
GO:0051174	0.00164839	9.01018	0.518855	4	239	regulation of phosphorus metabolic process	0.00369179	9	CNS	CG9286; Dg; par-6; XNP
GO:0046716	0.00165695	38.1046	0.0607864	2	28	muscle cell cellular homeostasis	0.00369179	9	CNS	CG3408; Dg
GO:0032504	0.00169473	4.06922	2.96768	9	1367	multicellular organism reproduction	0.00371087	9	CNS	brat; Cap-G; Dg; l(3)01239; Lar; Lasp; mfas; par-6; tkv
GO:0044702	0.00182248	4.33784	2.40106	8	1106	single organism reproductive process	0.00392297	9	CNS	brat; Cap-G; Dg; l(3)01239; Lar; Lasp; par-6; tkv
GO:0045214	0.00190171	35.3771	0.0651282	2	30	sarcomere organization	0.00402529	9	CNS	Dg; Lasp
GO:0045664	0.00201299	13.4825	0.254	3	117	regulation of neuron differentiation	0.00419097	9	CNS	Lar; RhoGAPp190; sdk
GO:0048646	0.00208806	5.32459	1.38506	6	638	anatomical structure formation involved in morphogenesis	0.00427099	9	CNS	Cap-G; CLIP-190; Dg; Lasp; par-6; tkv
GO:0032268	0.00211868	6.37801	0.937847	5	432	regulation of cellular protein metabolic process	0.00427099	9	CNS	brat; CG9286; par-6; PEK; XNP
GO:0009790	0.00227708	5.22862	1.40894	6	649	embryo development	0.00443182	9	CNS	Dg; Lar; Lasp; par-6; Sema-1b; tkv
GO:0007293	0.00232161	12.8021	0.267026	3	123	germarium-derived egg chamber formation	0.00443182	9	CNS	Cap-G; Dg; par-6
GO:0051124	0.00232161	12.8021	0.267026	3	123	synaptic growth at neuromuscular junction	0.00443182	9	CNS	brat; Lar; tkv
GO:0022603	0.00233805	8.15914	0.570958	4	263	regulation of anatomical structure morphogenesis	0.00443182	9	CNS	Lar; par-6; RhoGAPp190; tkv
GO:0051128	0.00247888	5.13587	1.43282	6	660	regulation of cellular component organization	0.00462653	9	CNS	brat; Lar; Lasp; par-6; RhoGAPp190; tkv
GO:0048609	0.00256761	4.08737	2.53349	8	1167	multicellular organismal reproductive process	0.00462653	9	CNS	brat; Cap-G; Dg; l(3)01239; Lar; Lasp; par-6; tkv
GO:0051246	0.00270771	6.01267	0.99212	5	457	regulation of protein metabolic process	0.00462653	9	CNS	brat; CG9286; par-6; PEK; XNP
GO:0032535	0.00271705	12.0896	0.282222	3	130	regulation of cellular component size	0.00462653	9	CNS	Lar; Lasp; RhoGAPp190
GO:0048856	0.00272949	3.16323	7.66342	15	3530	anatomical structure development	0.00462653	9	CNS	brat; Cap-G; CLIP-190; Dg; l(3)01239; Lar; Lasp; mfas; par-6; RhoGAPp190; sdk; Sema-1b; tkv; vlc; XNP
GO:0030155	0.0027322	29.12	0.0781539	2	36	regulation of cell adhesion	0.00462653	9	CNS	Lar; tkv
GO:0035088	0.0027322	29.12	0.0781539	2	36	establishment or maintenance of apical/basal cell polarity	0.00462653	9	CNS	Dg; par-6
GO:0061245	0.0027322	29.12	0.0781539	2	36	establishment or maintenance of bipolar cell polarity	0.00462653	9	CNS	Dg; par-6
GO:0050770	0.00288447	28.2857	0.0803248	2	37	regulation of axonogenesis	0.00481621	9	CNS	Lar; RhoGAPp190
GO:0019953	0.00292006	3.99591	2.58559	8	1191	sexual reproduction	0.00481621	9	CNS	brat; Cap-G; Dg; l(3)01239; Lar; Lasp; par-6; tkv
GO:0048731	0.0030399	3.26552	5.32749	12	2454	system development	0.00485587	9	CNS	brat; Cap-G; Dg; Lar; mfas; par-6; RhoGAPp190; sdk; Sema-1b; tkv; vlc; XNP
GO:0007275	0.00305321	3.14304	6.90577	14	3181	multicellular organismal development	0.00485587	9	CNS	brat; Cap-G; CLIP-190; Dg; Lar; Lasp; mfas; par-6; RhoGAPp190; sdk; Sema-1b; tkv; vlc; XNP
GO:0044703	0.00319219	3.93333	2.6225	8	1208	multi-organism reproductive process	0.00485587	9	CNS	brat; Cap-G; Dg; l(3)01239; Lar; Lasp; par-6; tkv
GO:0055059	0.00320073	26.7524	0.0846667	2	39	asymmetric neuroblast division	0.00485587	9	CNS	brat; par-6
GO:0051179	0.00321163	3.34077	4.62193	11	2129	localization	0.00485587	9	CNS	brat; CG10960; CG3036; Dg; l(3)01239; Lar; Lasp; par-6; Ranbp21; tkv; XNP
GO:0022607	0.00321678	4.30043	2.04286	7	941	cellular component assembly	0.00485587	9	CNS	brat; Dg; Lar; Lasp; par-6; tkv; XNP
GO:0065007	0.00326137	3.09037	7.79151	15	3589	biological regulation	0.00485587	9	CNS	brat; CG10960; CG3408; CG8243; CG9286; Dg; Lar; Lasp; mfas; par-6; PEK; RhoGAPp190; sdk; tkv; XNP
GO:0010608	0.00335054	11.198	0.303932	3	140	posttranscriptional regulation of gene expression	0.00485587	9	CNS	brat; Dg; PEK
GO:0030239	0.0033647	26.0463	0.0868377	2	40	myofibril assembly	0.00485587	9	CNS	Dg; Lasp
GO:0036445	0.0033647	26.0463	0.0868377	2	40	neuronal stem cell division	0.00485587	9	CNS	brat; par-6
GO:0055057	0.0033647	26.0463	0.0868377	2	40	neuroblast division	0.00485587	9	CNS	brat; par-6
GO:0051704	0.00385188	3.55821	3.33891	9	1538	multi-organism process	0.00546738	9	CNS	brat; Cap-G; Dg; l(3)01239; Lar; Lasp; par-6; Spn; tkv
GO:0030010	0.00387971	24.1346	0.0933505	2	43	establishment of cell polarity	0.00546738	9	CNS	Dg; par-6
GO:0007309	0.00391757	10.5733	0.321299	3	148	oocyte axis specification	0.00546738	9	CNS	Dg; Lasp; par-6
GO:0007308	0.00422176	10.2861	0.329983	3	152	oocyte construction	0.00573142	9	CNS	Dg; Lasp; par-6
GO:0019362	0.00424216	23.0084	0.0976924	2	45	pyridine nucleotide metabolic process	0.00573142	9	CNS	CG8080; Dg
GO:0046496	0.00424216	23.0084	0.0976924	2	45	nicotinamide nucleotide metabolic process	0.00573142	9	CNS	CG8080; Dg
GO:0007528	0.0043	10.2167	0.332154	3	153	neuromuscular junction development	0.00574842	9	CNS	brat; Lar; tkv
GO:0050789	0.00437594	2.99269	7.15977	14	3298	regulation of biological process	0.005789	9	CNS	brat; CG10960; CG8243; CG9286; Dg; Lar; Lasp; mfas; par-6; PEK; RhoGAPp190; sdk; tkv; XNP
GO:0022414	0.00442329	3.70959	2.76361	8	1273	reproductive process	0.00579132	9	CNS	brat; Cap-G; Dg; l(3)01239; Lar; Lasp; par-6; tkv
GO:0051301	0.00447168	6.76583	0.683847	4	315	cell division	0.00579493	9	CNS	brat; Cap-G; par-6; tkv
GO:0050803	0.00487249	9.75557	0.347351	3	160	regulation of synapse structure or activity	0.00625057	9	CNS	brat; Dg; tkv
GO:0048103	0.00501234	21.0434	0.106376	2	49	somatic stem cell division	0.00630572	9	CNS	brat; par-6
GO:0000003	0.00501479	3.40252	3.47134	9	1599	reproduction	0.00630572	9	CNS	brat; Cap-G; Dg; l(3)01239; Lar; Lasp; mfas; par-6; tkv
GO:0044085	0.00515361	3.92089	2.22304	7	1024	cellular component biogenesis	0.00641675	9	CNS	brat; Dg; Lar; Lasp; par-6; tkv; XNP
GO:0072524	0.00521422	20.6033	0.108547	2	50	pyridine-containing compound metabolic process	0.00642919	9	CNS	CG8080; Dg
GO:0051241	0.00548918	9.33384	0.362547	3	167	negative regulation of multicellular organismal process	0.00670313	9	CNS	brat; sdk; tkv
GO:0022604	0.00558094	9.27652	0.364718	3	168	regulation of cell morphogenesis	0.00673411	9	CNS	Lar; par-6; RhoGAPp190
GO:0006733	0.00562909	19.776	0.112889	2	52	oxidoreduction coenzyme metabolic process	0.00673411	9	CNS	CG8080; Dg
GO:0048599	0.00567362	9.21988	0.366889	3	169	oocyte development	0.00673411	9	CNS	Dg; Lasp; par-6
GO:0055001	0.00584204	19.3867	0.11506	2	53	muscle cell development	0.00680678	9	CNS	Dg; Lasp
GO:0055002	0.00584204	19.3867	0.11506	2	53	striated muscle cell development	0.00680678	9	CNS	Dg; Lasp
GO:0050794	0.00591799	2.90495	6.55407	13	3019	regulation of cellular process	0.00683259	9	CNS	brat; CG10960; CG9286; Dg; Lar; Lasp; mfas; par-6; PEK; RhoGAPp190; sdk; tkv; XNP
GO:0051093	0.00624928	8.8939	0.379915	3	175	negative regulation of developmental process	0.00715007	9	CNS	brat; sdk; tkv
GO:0048589	0.00654875	6.04586	0.762	4	351	developmental growth	0.00742582	9	CNS	brat; Dg; Lar; tkv
GO:0044767	0.00712282	2.77713	8.39503	15	3867	single-organism developmental process	0.00800423	9	CNS	brat; Cap-G; CLIP-190; Dg; l(3)01239; Lar; Lasp; mfas; par-6; RhoGAPp190; sdk; Sema-1b; tkv; vlc; XNP
GO:0050768	0.007196	17.3375	0.128086	2	59	negative regulation of neurogenesis	0.00800423	9	CNS	brat; sdk
GO:0048523	0.00724792	3.66062	2.36633	7	1090	negative regulation of cellular process	0.00800423	9	CNS	brat; Lar; mfas; par-6; PEK; sdk; XNP
GO:0001932	0.00739305	8.35178	0.403795	3	186	regulation of protein phosphorylation	0.00809412	9	CNS	CG9286; par-6; XNP
GO:0098722	0.00767599	16.7471	0.132427	2	61	asymmetric stem cell division	0.00824451	9	CNS	brat; par-6
GO:0009994	0.00772517	8.21505	0.410308	3	189	oocyte differentiation	0.00824451	9	CNS	Dg; Lasp; par-6
GO:0051130	0.00772517	8.21505	0.410308	3	189	positive regulation of cellular component organization	0.00824451	9	CNS	Lasp; par-6; tkv
GO:0032502	0.00795283	2.73369	8.48621	15	3909	developmental process	0.00837963	9	CNS	brat; Cap-G; CLIP-190; Dg; l(3)01239; Lar; Lasp; mfas; par-6; RhoGAPp190; sdk; Sema-1b; tkv; vlc; XNP
GO:0048469	0.00806605	8.08267	0.416821	3	192	cell maturation	0.00837963	9	CNS	Dg; Lasp; par-6
GO:0090066	0.00806605	8.08267	0.416821	3	192	regulation of anatomical structure size	0.00837963	9	CNS	Lar; Lasp; RhoGAPp190
GO:0007389	0.0081157	4.57759	1.2852	5	592	pattern specification process	0.00837963	9	CNS	brat; Dg; Lasp; par-6; tkv
GO:0010769	0.00893754	15.4325	0.143282	2	66	regulation of cell morphogenesis involved in differentiation	0.00915377	9	CNS	Lar; RhoGAPp190
GO:0001763	0.00973607	14.7379	0.149795	2	69	morphogenesis of a branching structure	0.00981334	9	CNS	par-6; tkv
GO:0010721	0.00973607	14.7379	0.149795	2	69	negative regulation of cell development	0.00981334	9	CNS	brat; sdk
GO:0044763	0.0099532	2.7598	12.5025	19	5759	single-organism cellular process	0.0099532	9	CNS	brat; Cap-G; CG10960; CG3036; CG3408; CG8080; CLIP-190; Dg; l(3)01239; Lar; Lasp; mfas; par-6; PEK; RhoGAPp190; sdk; Sema-1b; tkv; XNP
GO:0035151	1.13406e-08	294.929	0.0295891	4	46	regulation of tube size, open tracheal system	9.19325e-07	10	CNS	Fas2; grh; Nrg; nrv2
GO:0035150	1.59883e-08	269.196	0.0321621	4	50	regulation of tube size	9.19325e-07	10	CNS	Fas2; grh; Nrg; nrv2
GO:0090066	4.4899e-08	109.109	0.123502	5	192	regulation of anatomical structure size	1.72113e-06	10	CNS	ab; Fas2; grh; Nrg; nrv2
GO:0035152	8.84727e-08	171.625	0.0488864	4	76	regulation of tube architecture, open tracheal system	2.54359e-06	10	CNS	Fas2; grh; Nrg; nrv2
GO:0035159	8.58969e-07	256.552	0.0205837	3	32	regulation of tube length, open tracheal system	1.97563e-05	10	CNS	Fas2; grh; nrv2
GO:0007424	7.26937e-06	54.4866	0.146659	4	228	open tracheal system development	0.00013933	10	CNS	Fas2; grh; Nrg; nrv2
GO:0060541	9.66712e-06	50.5726	0.157594	4	245	respiratory system development	0.000148169	10	CNS	Fas2; grh; Nrg; nrv2
GO:0007417	1.03074e-05	49.7306	0.160167	4	249	central nervous system development	0.000148169	10	CNS	ab; Fas2; grh; Nrg
GO:0016319	1.35016e-05	97.5237	0.0508161	3	79	mushroom body development	0.000172521	10	CNS	ab; Fas2; Nrg
GO:0035158	1.98562e-05	460	0.00707566	2	11	regulation of tube diameter, open tracheal system	0.000228347	10	CNS	Fas2; nrv2
GO:0061343	2.38198e-05	413.967	0.0077189	2	12	cell adhesion involved in heart morphogenesis	0.000249025	10	CNS	Nrg; nrv2
GO:0060857	3.28213e-05	344.917	0.00900539	2	14	establishment of glial blood-brain barrier	0.000314538	10	CNS	Nrg; nrv2
GO:0035296	3.78586e-05	318.359	0.00964863	2	15	regulation of tube diameter	0.000334903	10	CNS	Fas2; nrv2
GO:0060856	4.3253e-05	295.595	0.0102919	2	16	establishment of blood-brain barrier	0.000355293	10	CNS	Nrg; nrv2
GO:0048513	5.42884e-05	23.0021	0.926268	6	1440	organ development	0.000416211	10	CNS	ab; Fas2; grh; Mes2; Nrg; nrv2
GO:0035295	6.36391e-05	23.2912	0.537107	5	835	tube development	0.000457406	10	CNS	ab; Fas2; grh; Mes2; Nrg
GO:0007420	6.88097e-05	55.4707	0.0874809	3	136	brain development	0.000465477	10	CNS	ab; Fas2; Nrg
GO:0072499	9.09866e-05	196.952	0.0147946	2	23	photoreceptor cell axon guidance	0.000581303	10	CNS	Fas2; Nrg
GO:0009887	9.7923e-05	21.1472	0.58728	5	913	organ morphogenesis	0.000592692	10	CNS	ab; Fas2; grh; Nrg; nrv2
GO:0060322	0.000117934	46.0087	0.104848	3	163	head development	0.000675389	10	CNS	ab; Fas2; Nrg
GO:0048468	0.000123332	19.5435	1.06778	6	1660	cell development	0.000675389	10	CNS	ab; Ance; Fas2; grh; Nrg; nrv2
GO:0019991	0.000145728	153.111	0.018654	2	29	septate junction assembly	0.000761762	10	CNS	Nrg; nrv2
GO:0021782	0.000189275	133.312	0.021227	2	33	glial cell development	0.000905617	10	CNS	Nrg; nrv2
GO:0000904	0.000196146	22.7195	0.339632	4	528	cell morphogenesis involved in differentiation	0.000905617	10	CNS	ab; Fas2; grh; Nrg
GO:0065008	0.000196873	18.0431	0.679263	5	1056	regulation of biological quality	0.000905617	10	CNS	ab; Fas2; grh; Nrg; nrv2
GO:0007552	0.000210918	22.2753	0.346064	4	538	metamorphosis	0.000907884	10	CNS	ab; Ance; Fas2; Nrg
GO:0003007	0.000213155	125.212	0.0225135	2	35	heart morphogenesis	0.000907884	10	CNS	Nrg; nrv2
GO:0010001	0.000265117	111.64	0.0250864	2	39	glial cell differentiation	0.00101761	10	CNS	Nrg; nrv2
GO:0043297	0.000265117	111.64	0.0250864	2	39	apical junction assembly	0.00101761	10	CNS	Nrg; nrv2
GO:0060562	0.000265462	20.9206	0.367291	4	571	epithelial tube morphogenesis	0.00101761	10	CNS	ab; Fas2; grh; Nrg
GO:0060429	0.000275472	16.6977	0.728793	5	1133	epithelium development	0.00102191	10	CNS	ab; Fas2; grh; Mes2; Nrg
GO:0009653	0.000291509	16.39	1.24081	6	1929	anatomical structure morphogenesis	0.00104761	10	CNS	ab; Ance; Fas2; grh; Nrg; nrv2
GO:0007155	0.000301967	33.1439	0.144086	3	224	cell adhesion	0.00105231	10	CNS	Fas2; Nrg; nrv2
GO:0035239	0.000329643	19.715	0.388518	4	604	tube morphogenesis	0.00111497	10	CNS	ab; Fas2; grh; Nrg
GO:0007043	0.000353522	96.0155	0.0289459	2	45	cell-cell junction assembly	0.00114979	10	CNS	Nrg; nrv2
GO:0002165	0.000360021	19.2427	0.397524	4	618	instar larval or pupal development	0.00114979	10	CNS	ab; Fas2; Mes2; Nrg
GO:0022610	0.000369933	30.8658	0.154378	3	240	biological adhesion	0.00114979	10	CNS	Fas2; Nrg; nrv2
GO:0034329	0.000419401	87.8156	0.0315189	2	49	cell junction assembly	0.00124161	10	CNS	Nrg; nrv2
GO:0009888	0.000439335	14.9719	0.804052	5	1250	tissue development	0.00124161	10	CNS	ab; Fas2; grh; Mes2; Nrg
GO:0007411	0.000442023	28.9929	0.164027	3	255	axon guidance	0.00124161	10	CNS	ab; Fas2; Nrg
GO:0007275	0.00044266	20.4112	2.04615	7	3181	multicellular organismal development	0.00124161	10	CNS	ab; Ance; Fas2; grh; Mes2; Nrg; nrv2
GO:0097485	0.000483936	28.0823	0.169173	3	263	neuron projection guidance	0.00132506	10	CNS	ab; Fas2; Nrg
GO:0009791	0.000534292	17.2511	0.440621	4	685	post-embryonic development	0.00142892	10	CNS	ab; Fas2; Mes2; Nrg
GO:0006935	0.000557391	26.7165	0.177535	3	276	chemotaxis	0.00145682	10	CNS	ab; Fas2; Nrg
GO:0007444	0.000570977	16.9351	0.44834	4	697	imaginal disc development	0.00145916	10	CNS	ab; Fas2; Mes2; Nrg
GO:0002009	0.000629379	16.481	0.459918	4	715	morphogenesis of an epithelium	0.00154821	10	CNS	ab; Fas2; grh; Nrg
GO:0048666	0.000632745	16.4565	0.460561	4	716	neuron development	0.00154821	10	CNS	ab; Fas2; grh; Nrg
GO:0008045	0.000650121	69.887	0.0392378	2	61	motor neuron axon guidance	0.00155758	10	CNS	Fas2; Nrg
GO:0048729	0.000684816	16.0963	0.47021	4	731	tissue morphogenesis	0.00160722	10	CNS	ab; Fas2; grh; Nrg
GO:0045216	0.000783958	63.4051	0.0430972	2	67	cell-cell junction organization	0.0018031	10	CNS	Nrg; nrv2
GO:0034330	0.000807454	62.4394	0.0437405	2	68	cell junction organization	0.00180797	10	CNS	Nrg; nrv2
GO:0022008	0.000817519	12.9111	0.917263	5	1426	neurogenesis	0.00180797	10	CNS	ab; Fas2; grh; Nrg; nrv2
GO:0007409	0.000850625	22.9994	0.205194	3	319	axonogenesis	0.0018457	10	CNS	ab; Fas2; Nrg
GO:0048856	0.000888936	17.6957	2.27064	7	3530	anatomical structure development	0.00186146	10	CNS	ab; Ance; Fas2; grh; Mes2; Nrg; nrv2
GO:0000902	0.000898106	14.9142	0.504945	4	785	cell morphogenesis	0.00186146	10	CNS	ab; Fas2; grh; Nrg
GO:0007173	0.000930015	58.0188	0.0469567	2	73	epidermal growth factor receptor signaling pathway	0.00186146	10	CNS	Fas2; Nrg
GO:0038127	0.000930015	58.0188	0.0469567	2	73	ERBB signaling pathway	0.00186146	10	CNS	Fas2; Nrg
GO:0061564	0.000938822	22.2055	0.21227	3	330	axon development	0.00186146	10	CNS	ab; Fas2; Nrg
GO:0030154	0.00104905	12.4525	1.556	6	2419	cell differentiation	0.00201323	10	CNS	ab; Ance; Fas2; grh; Nrg; nrv2
GO:0042330	0.00105038	21.3335	0.220632	3	343	taxis	0.00201323	10	CNS	ab; Fas2; Nrg
GO:0030182	0.00110432	14.0655	0.533248	4	829	neuron differentiation	0.00208191	10	CNS	ab; Fas2; grh; Nrg
GO:0048731	0.00113701	12.2316	1.57852	6	2454	system development	0.00210896	10	CNS	ab; Fas2; grh; Mes2; Nrg; nrv2
GO:0042063	0.00117186	51.4542	0.0527458	2	82	gliogenesis	0.0021391	10	CNS	Nrg; nrv2
GO:0048869	0.00131608	11.8376	1.62033	6	2519	cellular developmental process	0.00236482	10	CNS	ab; Ance; Fas2; grh; Nrg; nrv2
GO:0044707	0.00151935	15.7816	2.46104	7	3826	single-multicellular organism process	0.00268809	10	CNS	ab; Ance; Fas2; grh; Mes2; Nrg; nrv2
GO:0032989	0.00156967	12.7185	0.58535	4	910	cellular component morphogenesis	0.00269422	10	CNS	ab; Fas2; grh; Nrg
GO:0048699	0.00156967	12.7185	0.58535	4	910	generation of neurons	0.00269422	10	CNS	ab; Fas2; grh; Nrg
GO:0007399	0.00161923	10.9184	1.06199	5	1651	nervous system development	0.00271781	10	CNS	ab; Fas2; grh; Nrg; nrv2
GO:0044767	0.00163069	15.5396	2.48742	7	3867	single-organism developmental process	0.00271781	10	CNS	ab; Ance; Fas2; grh; Mes2; Nrg; nrv2
GO:0032502	0.00175174	15.297	2.51443	7	3909	developmental process	0.00287786	10	CNS	ab; Ance; Fas2; grh; Mes2; Nrg; nrv2
GO:0007507	0.00187658	40.2843	0.0668972	2	104	heart development	0.00293234	10	CNS	Nrg; nrv2
GO:0072358	0.00187658	40.2843	0.0668972	2	104	cardiovascular system development	0.00293234	10	CNS	Nrg; nrv2
GO:0072359	0.00187658	40.2843	0.0668972	2	104	circulatory system development	0.00293234	10	CNS	Nrg; nrv2
GO:0009605	0.00188882	12.0557	0.614939	4	956	response to external stimulus	0.00293234	10	CNS	ab; Ance; Fas2; Nrg
GO:0098609	0.0019124	39.89	0.0675404	2	105	cell-cell adhesion	0.00293234	10	CNS	Fas2; Nrg
GO:0008038	0.00221071	36.991	0.0726863	2	113	neuron recognition	0.00327453	10	CNS	ab; Fas2
GO:0016043	0.00221894	10.5049	1.77985	6	2767	cellular component organization	0.00327453	10	CNS	ab; Ance; Fas2; grh; Nrg; nrv2
[truncated: 9,040 more rows]
