# Supplementary material for: The developmental proteome of Drosophila melanogaster
Source: HighWire-hosted journal article supplement (doi:10.1101/gr.213694.116), 2017-04-05
Supplement: Supplemental_Tables.zip [file Supplemental_Table_S16.xlsx]

## Sheet: lfq
pgroup	flybase_gene	cluster	00h	01h	02h	03h	04h	05h	06h	08h	10h	12h	14h	16h	18h	20h
FBtr0070008	CG9578	3	0.0482997	0.0314872	0	1	0.959952	0.96497	0.934626	0.910477	0.989058	0.787759	0.802135	0.847385	0.847857	0.851697
FBtr0070038	alpha-Cat	6	0.100098	0	0.565664	0.86994	0.90485	0.94185	0.96499	0.969849	1	0.984953	0.940196	0.926288	0.913633	0.934863
FBtr0070063;FBtr0332992	G9a	2	0.216018	0.774146	0.828064	0.234275	0.22589	0.231962	0	0.209308	1	0.923045	0.819282	0.865628	0.879892	0.940053
FBtr0344149;FBtr0342962;FBtr0070068;FBtr0070067;FBtr0070066	CG3777	4	0.0863071	0.046187	0.0667211	0.036143	0.0180848	0.131071	0.0772955	0.0708119	0.0767536	0.0494841	0.0732988	0	0.93593	1
FBtr0070088	arg	4	0.0685464	0	0.0532692	0.0405803	0.0225117	0.103052	0.0985177	0.0123077	0.0748822	0.0252926	0.0482076	0.837107	0.792492	1
FBtr0114366;FBtr0100254;FBtr0307173;FBtr0070091	elav	3	0	0.0528951	0.0435074	0.00717437	0.310944	0.42089	0.507085	0.679078	0.795061	0.832344	0.956971	0.972386	0.979145	1
FBtr0307292;FBtr0307294;FBtr0070109;FBtr0307295;FBtr0307293;FBtr0307291	Appl	4	0	0.123589	0.125506	0.137138	0.062565	0.145857	0.169988	0.0990285	0.151506	0.157059	0.984137	0.856658	0.886492	1
FBtr0070121	CG13367	2	0	0.0934781	0.165987	0.0884908	0.0631809	0.0685703	0.128993	0.121431	0.114041	0.969384	0.953535	1	0.966412	0.981844
FBtr0343564;FBtr0070122;FBtr0308651	Roc1a	6	0.0587841	0	0.759061	0.96593	0.941967	0.851214	0.88101	1	0.943767	0.893474	0.978278	0.996401	0.953303	0.865346
FBtr0070134;FBtr0343759	CG5254	5	0.67155	0.680668	0.682769	0.731017	0	0.0600335	0.0352424	0.0306819	0.777121	0.855267	1	0.978954	0.904364	0.98242
FBtr0070150	CG13362	5	0.0258008	0.0412523	0.0265407	0.0245643	0.0316692	0.0242594	0.00591779	0.0315061	0	0.019706	0.722043	0.854649	0.856258	1
FBtr0070159	CG13364	2	0.545175	1	0.631258	0.542848	0.566597	0.431498	0.492007	0.378351	0	0.0132936	0.063737	0.889149	0.809839	0.710105
FBtr0070173	CG3021	1	1	0.969174	0.949712	0.944685	0.883187	0.93698	0.799632	0.0998839	0.0814331	0.12867	0.123227	0.0184702	0	0.0266044
FBtr0070176;FBtr0336687;FBtr0305652;FBtr0305651;FBtr0302884	su(w[a])	6	0	0.0374529	0.928264	0.821313	0.659896	0.0702141	0.0465621	0.897864	0.827028	0.731401	0.839723	1	0.970903	0.856237
FBtr0070179	CG14629	5	0.707625	0.580117	0.491272	0.445531	0	0.0104907	0.525704	0.567837	0.689114	0.678201	1	0.971029	0.860279	0.950884
FBtr0070186	CG3699	4	0.0337349	0.0955248	0	0.0343937	0.020166	0.0295964	0.0183819	0.035648	0.0188524	0.0124863	0.544694	0.727939	0.776639	1
FBtr0345513;FBtr0310611;FBtr0070197	CG11378	4	0.0718227	0.0524533	0	0.0154779	0.052879	0.0330971	0.0224037	0.0233498	0.0163079	0.0269704	0.0652131	0.688772	0.573843	1
FBtr0070203	CG11381	4	1	0.0664023	0	0.0397716	0.0582093	0.104676	0.0674599	0.0492831	0.0372818	0.0367864	0.0548357	0.0854395	0.0331945	0.0384103
FBtr0070207	fs(1)N	1	1	0.776449	0.531165	0.468143	0.379091	0.316373	0.278495	0.1439	0.0834283	0	0.0404466	0.117982	0.270682	0.300532
FBtr0342737;FBtr0342736;FBtr0342735;FBtr0330320;FBtr0330319;FBtr0330318;FBtr0070222;FBtr0070219;FBtr0330317	CG32813	5	0.0909414	0.177099	0.0322325	0.0805237	0.104565	0.136856	0.173436	0	0.174995	0.144494	0.981773	1	0.963187	0.951099
FBtr0070234	png	1	1	0.922142	0.790693	0.626913	0.474666	0.320389	0.0524885	0.0479638	0	0.0729528	0.0855268	0.017274	0.0834623	0.0540325
FBtr0070256;FBtr0070255	pck	3	0.94622	0.0708892	0.0390283	0.0673629	0	0.685344	0.614334	0.791492	0.824927	0.833577	0.955494	1	0.959887	0.996556
FBtr0331384;FBtr0070313	CG14806	2	0.869765	0.645012	0.733552	0.660572	0.846874	0.700444	0.0545285	0	0.903064	0.854088	0.946828	0.954416	1	0.97188
FBtr0070315	mip130	6	0	0.0250685	0.657886	0.725842	0.678067	0.774547	0.844082	0.86926	0.887259	0.896143	0.963054	0.983006	0.952697	1
FBtr0070328	CG4194	2	0.0516003	0.0945985	0	0.0238143	0.0330419	0.0606641	0.0376985	0.0360528	0.711645	0.830488	1	0.992739	0.884422	0.802135
FBtr0333803;FBtr0070346	usp	6	0.0849616	0	0.779768	0.851379	0.855987	0.840563	0.872716	0.841013	0.922106	0.888653	0.957133	1	0.955943	0.994974
FBtr0070362;FBtr0070363	trr	6	0.0502148	0.0152718	0	0.820553	0.730974	0.777359	0.818355	0.852139	0.887917	0.913231	0.969284	0.972277	0.937042	1
FBtr0070369;FBtr0339494;FBtr0070370	CG14814	1	0.149493	0.843442	1	0.848127	0.629784	0.651419	0.671456	0	0.0357464	0.0657693	0.017853	0.0128787	0.0335324	0.0221412
FBtr0333511;FBtr0070372	CG14812	6	0.0473779	0	0.0438053	1	0.958017	0.980441	0.916304	0.97706	0.898584	0.927403	0.915787	0.88553	0.928132	0.735504
FBtr0070396	fs(1)K10	6	0.0159098	0	0.805208	0.744585	0.823594	0.793512	0.686393	0.860541	0.81543	0.89634	0.933565	1	0.959956	0.968496
FBtr0344007;FBtr0070401	phl	2	0.0101904	0.0383274	1	0.634199	0.847504	0.684187	0.698591	0.890422	0.130807	0	0.0495118	0.817866	0.883568	0.833589
FBtr0342769;FBtr0070419	kz	6	0	0.0175133	0.514814	0.655456	0.691927	0.676428	0.731421	0.642949	0.787291	0.832928	0.902338	0.938558	0.849403	1
FBtr0100380;FBtr0070435;FBtr0331161	z	6	0	0.0869416	0.0889647	0.0720288	0.660703	0.901286	0.885429	0.860828	0.925744	0.851457	0.880969	0.950673	0.932794	1
FBtr0340091;FBtr0070440;FBtr0070439	egh	3	0.078404	0.0110778	0.973168	0.0314378	0	1	0.910572	0.948263	0.958508	0.813625	0.800902	0.918257	0.940603	0.958726
FBtr0307159;FBtr0070445	Tsp3A	2	0.0861048	0.0790853	0.0247699	0.0383625	0.027287	0.0821576	0	0.128109	0.995209	0.890126	1	0.942653	0.829264	0.862927
FBtr0340093;FBtr0070448	Klp3A	2	0.859248	0.86961	1	0.927628	0.939664	0.947881	0.960262	0.946898	0.867632	0.751147	0.137826	0.351368	0.412284	0
FBtr0070473;FBtr0070472;FBtr0070470;FBtr0070469;FBtr0070468;FBtr0070466;FBtr0070474;FBtr0070467;FBtr0070475;FBtr0331753;FBtr0112828;FBtr0301966;FBtr0070476;FBtr0302185	sgg	2	0.0832562	0.0459164	0.0218353	0	0.779663	0.784256	0.851313	0.761041	0.905764	1	0.0461371	0.0150335	0.0248699	0.0528494
FBtr0070485	fs(1)Ya	1	1	0.908507	0.981355	0.0794982	0.0351871	0.0369935	0.0255345	0.0567449	0.0331407	0.02351	0.0524548	0	0.0290164	0.0446736
FBtr0070499	CG2685	6	0	0.0381163	0.89586	0.733285	0.778239	0.774615	0.869503	0.904237	0.934189	0.869279	0.979714	1	0.816302	0.980961
FBtr0345710;FBtr0070501;FBtr0273276	Csat	5	0	0.0404622	0.0250201	0.0419163	0.0823573	0.0447879	0.040298	0.0285893	0.10461	0.85226	0.946603	0.936059	1	0.918873
FBtr0343600;FBtr0070508	CG3939	3	0.0603969	0	0.726464	0.969082	1	0.963007	0.955143	0.932718	0.982482	0.922253	0.931543	0.89801	0.951574	0.856675
FBtr0070542	Fcp3C	4	1	0.814216	0.643949	0.0623659	0.0597329	0.0387044	0.0725266	0.0843557	0.0901008	0.0884315	0.0338399	0	0.0219725	0.0688368
FBtr0343758;FBtr0070562	rst	5	0.0375495	0.0120563	0.0136335	0.00891335	0.00526669	0.0960244	0	0.848804	0.833756	0.938373	1	0.972983	0.880436	0.885098
FBtr0070584;FBtr0070583	Rala	2	1	0.937538	0.932613	0.79139	0.841528	0.860263	0	0.0512652	0.786203	0.824707	0.749663	0.811558	0.76082	0.82354
FBtr0070586;FBtr0333793;FBtr0070587	CG2875	6	0.0281756	0	0.0167084	0.687617	0.716372	0.747394	0.820071	0.827437	0.877448	0.902208	0.93549	0.989735	0.924484	1
FBtr0340202;FBtr0070610;FBtr0070609;FBtr0340201	CG2930	5	0.0581944	0.0822594	0.0760273	0.0500835	0.00140634	0.0673036	0.0189484	0	0.780142	0.70128	0.730925	0.807922	0.826577	1
FBtr0070612	CG15239	4	0.544622	0	0.138205	0.0571249	0.0506529	0.0448054	0.0331971	0.0932374	0.0939638	0.0693181	0.548676	0.666321	0.746383	1
FBtr0070665;FBtr0343523;FBtr0336882;FBtr0336884;FBtr0343524;FBtr0070666;FBtr0070667	Fas2	3	0.485793	0.00720422	0	0.373572	0.500237	0.459274	0.615978	0.78597	0.88479	0.927971	0.977901	0.957931	0.964721	1
FBtr0333186;FBtr0070668;FBtr0333185	Tip60	2	0	0.0232384	0.0583142	0.122827	0.0475537	0.0206251	0.0331224	0.0606734	0.97458	0.973293	0.983783	1	0.912923	0.971972
FBtr0343297;FBtr0070671	CG6379	2	0.014116	0.0362115	0.0557853	0.0360449	0.00388098	0.0284812	0.0323382	0	0.0512107	0.854705	0.979541	0.966879	0.95054	1
FBtr0100265;FBtr0070680	peb	5	0.0984089	0.189786	0.109613	0.0264087	0.146826	0	0.0348615	0.0814492	0.86304	0.623674	0.869047	0.892183	1	0.0831083
FBtr0070681	pon	2	0	0.0492734	0.0122251	0.0430279	1	0.924762	0.891339	0.0493973	0.0354722	0.0324232	0.0421982	0.911934	0.89601	0.907525
FBtr0070687;FBtr0070686	rap	6	0.0604059	0.0628141	0.134329	0	0.0629494	0.0950356	1	0.832005	0.83592	0.835995	0.893552	0.873819	0.867104	0.826442
FBtr0070721	CG6927	1	1	0.849428	0.571298	0.01037	0.0162875	0.0424942	0.028765	0.0271294	0.0508627	0.0144544	0.0567379	0.032969	0.0341452	0
FBtr0345745;FBtr0070749	dhd	1	1	0.358942	0.301778	0.190221	0.329737	0.0453646	0.0185079	0.0319991	0.0216393	0	0.0296233	0.0246112	0.0138952	0.0434482
FBtr0070751	Sas10	6	0	0.489854	0.71519	0.834288	0.826515	0.831044	0.846662	0.85132	0.878753	0.928766	0.967724	0.983885	0.933043	1
FBtr0070783;FBtr0308579	Mlc-c	3	0.0242288	0.433879	0	0.837314	0.840669	0.862345	0.883299	0.945615	1	0.966821	0.981198	0.872112	0.976868	0.800503
FBtr0332398;FBtr0070807	CG4078	6	0.042319	0	0.858627	0.878372	0.860632	0.931032	0.923918	0.883191	0.89552	0.893175	0.866628	0.853159	1	0.902902
FBtr0070833	CG3108	4	0.424805	0.0541764	0.0892032	0	0.0559495	0.0318716	0.0473918	0.0278547	0.000516554	0.00458648	0.218226	0.312743	0.571253	1
FBtr0070836	CG3097	5	0.0346628	0	0.0422764	0.0489974	0.0574633	0.0354827	0.0106232	0.0539462	0.000693015	0.783775	0.736253	0.80474	0.958926	1
FBtr0339744;FBtr0070840	lin-52	6	0.156458	0.256329	0	0.218655	0.143105	0.111656	0.780207	0.808333	0.740974	0.925055	1	0.932135	0.876306	0.933343
FBtr0070846	CG3149	1	0.825507	0.954174	1	0.853848	0.942502	0.0752186	0.0538456	0.0573746	0.0652257	0.011471	0	0.0162307	0.991918	0.941932
FBtr0308339;FBtr0070848;FBtr0340222	Tre1	2	0.0420918	0.0594048	0.0851829	0.0765156	0.156056	0.106747	0.0112265	0	0.0581023	0.891742	0.956131	0.991102	1	0.909528
FBtr0070851;FBtr0070850;FBtr0070852	Sirt4	4	1	0.90636	0.953809	0.0414265	0.049807	0.0775593	0.0548366	0.034785	0.100403	0.0605198	0.0879732	0.0155778	0.0171958	0
FBtr0070866;FBtr0343294	CG5966	1	1	0.921321	0.902148	0.0301791	0.00677621	0.0396327	0.011155	0.0123986	0.0436301	0.00184622	0.00688129	0	0.0826766	0.0179718
FBtr0345294;FBtr0339504;FBtr0339503;FBtr0339502;FBtr0070877	sqh	3	0	0.531598	0.748683	0.92676	0.947299	0.918847	0.946648	0.944146	0.974205	0.945952	1	0.956946	0.932305	0.891754
FBtr0070922	swa	1	1	0.820712	0.697014	0	0.0351791	0.0225881	0.0364358	0.00975459	0.0212805	0.0119707	0.0304571	0.0645526	0.0413374	0.0437637
FBtr0331599;FBtr0331600;FBtr0070945	Pat1	5	0.0472385	0.0642141	0.0680457	0.0587289	0.088337	0	0.0215695	0.0335699	0.0590151	0.79557	0.780606	0.847229	0.648886	1
FBtr0070946;FBtr0070947	APC7	1	0.994873	0.866224	1	0.505499	0.620328	0.547184	0.516172	0.336807	0.0370154	0.0374687	0.0282625	0	0.0469278	0.0538687
FBtr0339464;FBtr0070962;FBtr0070961	CG14438	6	0	0.00993447	0.813843	0.995629	1	0.978103	0.967439	0.949292	0.926511	0.913496	0.803037	0.895965	0.872112	0.798967
FBtr0300772;FBtr0339493;FBtr0339491;FBtr0070988	CG14442	2	0.0481624	0.0635149	0.0979726	0.0958676	0.0833265	0.0861672	0.082417	0.0453255	0.0987985	0	0.994379	1	0.939304	0.985294
FBtr0070992	CG3224	2	0.137942	0.127671	0	0.0735083	0.0918913	0.0769779	0.0789885	0.767182	0.824904	0.847817	0.999873	1	0.998233	0.998272
FBtr0331308;FBtr0071019	CG4617	2	0.0019909	0.140729	0	0.0141497	0.0975319	0.0178032	0.0872365	0.00776485	1	0.779078	0.863315	0.882122	0.9815	0.938536
FBtr0334881;FBtr0309875;FBtr0309874;FBtr0309873;FBtr0071037;FBtr0071036	ogre	3	0.0106197	0.00391312	0	0.69236	0.669815	0.832382	0.872098	0.930922	0.958272	0.980422	0.970598	1	0.980303	0.999625
FBtr0307272;FBtr0071072	Rab39	6	0	0.093896	0.899423	0.838918	0.885882	0.93066	0.96541	1	0.990033	0.949877	0.976027	0.970804	0.972657	0.962495
FBtr0310287;FBtr0333203;FBtr0112946;FBtr0071079	CHES-1-like	5	0.0448143	0.0708581	0.0455208	0.03899	0.041575	0.0432587	0.0531644	0	0.78316	0.714622	0.839085	0.924643	0.920425	1
FBtr0071091	CG1444	4	1	0.963677	0.8904	0.596453	0.559685	0.153811	0	0.072438	0.113415	0.285246	0.53786	0.605769	0.520118	0.710319
FBtr0340140;FBtr0071111;FBtr0071110;FBtr0071109	CG2258	2	0.0756321	0.0637116	0.134572	0.92212	1	0.859115	0.965344	0.0988991	0.081295	0.0760363	0.0183858	0	0.0780387	0.128753
FBtr0071116	CG2254	4	0.609061	0.362502	0	0.0212425	0.0297025	0.00408979	0.00146223	0.0403405	0.370977	0.49716	0.685279	0.797708	0.798892	1
FBtr0071119;FBtr0333307;FBtr0333308;FBtr0301309;FBtr0071122;FBtr0071121;FBtr0071120;FBtr0071118;FBtr0333309	fs(1)h	6	0.125	0	0.63585	0.768466	0.757091	0.758991	0.853631	0.888928	0.890925	0.867007	1	0.97607	0.896986	0.981595
FBtr0071129	l(1)G0193	1	1	0.878058	0.893492	0.808678	0.881815	0.783	0.962365	0.124339	0.14124	0.0588224	0.111575	0	0.103172	0.0567111
FBtr0071130	l(1)G0193	1	1	0.820281	0.838292	0	0.0670663	0.0602703	0.0538924	0.0885215	0.0568799	0.60462	0.566499	0.552284	0.0875331	0.0824962
FBtr0071146;FBtr0309795	dec-1	4	1	0.772023	0.558579	0.0583652	0.0381451	0.0512431	0.0518656	0.0734745	0.104343	0.104297	0.0712367	0.0994769	0.0872269	0
FBtr0339695;FBtr0071151	CG1575	3	0	0.619773	0.502497	0.620412	0.658543	0.687859	0.702803	0.730793	0.81159	0.841113	0.899933	0.984441	0.861656	1
FBtr0071166	CG2147	2	0.0682854	0	0.0788758	0.0834496	0.0558094	0.0484627	0.100907	0.0924084	0.580432	0.609609	0.468497	0.553152	1	0.593274
FBtr0071194	CG2260	6	0.0682694	0.0487681	0	0.805424	0.778852	0.80912	0.839104	0.864459	0.859226	0.918738	0.979946	0.993584	0.928364	1
FBtr0071198	Es2	2	0.120929	0.0462044	0	0.181243	0.178527	0.109169	0.793592	0.822483	0.611636	0.811069	0.926067	1	0.88848	0.98397
FBtr0071201	Cp7Fb	4	1	0.784644	0.596951	0.00202958	0.0505079	0.0261784	0.0144521	0.0127688	0	0.0449472	0.0150834	0.0305603	0.0511458	0.00368319
FBtr0071202	Cp7Fc	4	1	0.164976	0	0.0627005	0.12331	0.125706	0.0789087	0.10028	0.0927689	0.0962062	0.131017	0.117467	0.0987235	0.145322
FBtr0071203	Cp36	4	1	0.843814	0.558282	0.326983	0.262961	0.209774	0.14779	0.191176	0.026445	0.0516773	0.0642928	0	0.0322334	0.097907
FBtr0300448;FBtr0071204	Cp38	4	1	0.690378	0.338043	0.326075	0.195015	0.0977321	0.0128685	0	0.00146158	0.00137587	0.0159988	0.228576	0.363631	0.522063
FBtr0333522;FBtr0301764;FBtr0301762;FBtr0071209;FBtr0071207;FBtr0333523;FBtr0301763;FBtr0071208;FBtr0305914	Nrg	5	0.213893	0.0191851	0	0.124976	0.216247	0.241779	0.522903	0.685964	0.717758	0.826438	0.91599	0.922973	0.912194	1
FBtr0071215;FBtr0071214;FBtr0300751;FBtr0300750;FBtr0071217;FBtr0071216	CG12065	4	0.0532507	0.0484239	0.0360702	0.0428534	0.0131283	0.04337	0.0928024	0.0549709	0.0533156	0	0.902228	0.856431	0.798206	1
FBtr0071242;FBtr0302500	CG15347	4	0.0467365	0.0503716	0.0152117	0.0264564	0.0167833	0	0.064414	0.0146292	0.0247376	0.653747	0.760694	0.899581	0.897896	1
FBtr0071250	CG1785	6	0.00381491	0.0490476	0.0536023	0	0.641393	0.704715	0.668768	0.819544	0.888262	0.90061	0.991431	0.973453	0.964389	1
FBtr0071251	CG1789	2	0.147835	0.100575	0.0911635	0.148487	0.140212	0.119223	0	0.123078	0.922588	0.90695	0.876266	1	0.135579	0.160168
FBtr0335034;FBtr0335035;FBtr0307271;FBtr0071254;FBtr0071253	CG12075	4	0.0659887	0	0.0325821	0.0233193	0.125425	0.0470437	0.0739051	0.0946674	0.0507329	0.0441901	0.899244	0.952715	0.981294	1
FBtr0333605;FBtr0333604;FBtr0310067;FBtr0071267;FBtr0071266	e(r)	6	0	0.0167993	0.0645055	0.734559	0.828964	0.807012	0.776101	0.824961	0.906786	0.894697	0.94692	1	0.869462	0.941223
FBtr0309871;FBtr0301805;FBtr0071284	HP1b	6	0	0.0664419	0.0724588	0.820974	0.82667	0.801482	0.830356	0.842067	0.90843	0.886496	0.949665	1	0.929166	0.952468
FBtr0071286	CG32708	2	0.00555531	0.105865	0.0682069	0.00622514	0	0.0517342	0.60111	0.631501	0.656139	0.774617	0.901229	1	0.826686	0.912518
FBtr0071300	dalao	6	0.0171675	0	0.725856	0.787272	0.85599	0.857998	0.806468	0.845331	0.893294	0.850477	1	0.962998	0.919292	0.947895
FBtr0071306	CG12106	2	0	0.125926	0.0890667	0.804811	0.819638	0.852828	0.925691	0.878253	1	0.667594	0.0738675	0.0951173	0.136495	0.0285779
FBtr0071324	c12.1	6	0.0397908	0.0370208	0	0.818303	0.851277	0.89147	0.909056	0.990771	0.966114	0.946119	0.914543	1	0.962222	0.938869
FBtr0343367;FBtr0071332	mxc	6	0	0.463338	0.69488	0.897321	0.826343	0.844308	0.946889	0.989804	0.963872	1	0.962902	0.9483	0.912623	0.914625
FBtr0071338	su(r)	5	0.0726483	0.0741617	0	0.0795211	0.0454402	0.0558745	0.0544535	0.049315	0.622458	0.63835	0.847479	0.857233	0.83641	1
FBtr0302723;FBtr0071402;FBtr0302722;FBtr0333521	nej	6	0	0.0309532	0.994913	0.921407	0.992457	0.925885	0.983632	0.936946	0.983309	0.98861	0.976221	0.866679	0.979447	1
FBtr0346168;FBtr0071403	CG3106	4	0.0524198	0.0153046	0.0873236	0.0289408	0.205042	0.0683787	0.0468685	0.0450704	0.129722	0.0523477	0	0.0834034	0.688594	1
FBtr0307381;FBtr0071412;FBtr0071411	CG32694	4	1	0.920392	0.169736	0.067187	0.0463872	0.09484	0.066396	0.11669	0.0422227	0.0875655	0.0768751	0.0764912	0.0632903	0
FBtr0346350;FBtr0333306;FBtr0071465	Psf3	6	0.0124705	0	0.0263662	0.92508	0.841184	0.874077	1	0.991654	0.897518	0.903332	0.829943	0.949827	0.81261	0.860956
FBtr0346337;FBtr0346336;FBtr0071484	Ipod	4	0.0539175	0.0259557	0.0609911	0.0641895	0.0144329	0.0595241	0	0.0166338	0.0380155	0.0356451	0.0760913	0.081277	0.848275	1
FBtr0071486	CG2962	4	0.697862	0.00245997	0.00284148	0.00473916	0.0435789	0.0174327	0.000814739	0.0350781	0	0.496312	0.43406	0.54711	0.743495	1
FBtr0310444;FBtr0071510	CG1628	5	0.104349	0.0600983	0	0.10665	0.102946	0.0529143	0.0984496	0.105685	0.838574	0.845593	0.915217	0.94044	1	0.965333
FBtr0071519	Act57B	5	0	0.629544	0.725057	0.876606	0.0349304	0.0295523	0.0385724	0.0395313	0.681527	0.744946	0.853999	0.867571	0.9143	1
FBtr0332593;FBtr0071524;FBtr0332594;FBtr0303195	CG10543	5	0.0856148	0.059594	0.171387	0.0564788	0	0.0149477	0.0298298	0.0359778	0.817763	0.869663	0.882065	0.81905	0.826752	1
FBtr0332423;FBtr0071537;FBtr0071536;FBtr0071535;FBtr0071540;FBtr0071539;FBtr0071538	Treh	5	0.992262	0.826221	0.923299	0.954383	0.848518	0.952552	0.0935169	0.0531626	0	0.739582	0.865272	0.835336	0.87212	1
FBtr0071545	CG15653	2	0.205407	0.0329648	0	0.197663	0.111098	0.129451	0.0820804	0.0849782	0.0983381	0.979293	0.809823	0.859725	0.88777	1
FBtr0344196;FBtr0342801;FBtr0071563	sktl	6	0.0911344	0	0.000314165	0.969233	0.784159	0.889936	0.919784	0.973056	0.96319	0.957619	1	0.971922	0.909151	0.948091
FBtr0342870;FBtr0071582	tud	4	1	0.904789	0.881934	0.361324	0.346804	0.282382	0.15348	0	0.0385033	0.0417089	0.216846	0.254377	0.303092	0.387582
FBtr0071602;FBtr0071603;FBtr0342890	dom	6	0	0.0953807	0.927969	0.907972	0.88123	0.905512	0.924384	0.992787	0.969547	0.952644	0.994104	0.952437	1	0.93302
FBtr0071607	Acox57D-d	1	1	0.896819	0.766721	0.590462	0.515156	0.494418	0.346109	0.257571	0.165404	0.0938116	0.146082	0	0.0896926	0.146893
FBtr0071625	CG4302	5	0.0226452	0.0551864	0	0.0416063	0.0169558	0.021386	0.00638841	0.970016	0.90062	0.823551	0.960891	1	0.893443	0.948177
FBtr0071638;FBtr0071637	CG4050	2	0.804098	0.811784	0.937281	0	0.02671	0.00898959	0.748764	0.868406	0.912057	0.928221	0.87416	0.98047	0.896036	1
FBtr0071641	Sara	3	0	0.0115498	0.0453211	0.0142224	0.939391	0.871102	0.862604	1	0.878509	0.994234	0.90925	0.92829	0.993785	0.968089
FBtr0071653;FBtr0071654	Egfr	3	0.01766	0	0.0605051	0.763115	0.813876	0.887478	0.948977	1	0.967674	0.926341	0.893618	0.887029	0.922008	0.889587
FBtr0071666	NC2alpha	2	0.06547	0.0580317	0.070517	0.107705	0.13716	0	0.107881	0.964906	0.742157	0.679433	0.622361	0.812079	1	0.859768
FBtr0071679	Tbp	6	0	0.00516079	0.858106	0.788662	0.793711	0.934106	0.993269	0.829813	0.880416	0.855175	0.93699	0.974443	0.944782	1
FBtr0345664;FBtr0071688	CG18870	1	1	0.724178	0.00433703	0.0338502	0.0361081	0.0369815	0.0175818	0.0560777	0.0272838	0.0463708	0.0495855	0	0.158651	0.0591736
FBtr0071755	GlcT-1	5	0.986775	0.906263	0.867663	0.877547	0.840112	0.829639	0.900046	0.920269	1	0.888917	0.856968	0.82164	0	0.0471945
FBtr0071774	ari-2	2	0.114825	0.125591	0.0897532	0.131141	0.0748931	0.0766356	0.124853	0.154055	0.177469	1	0.829407	0.821866	0.112857	0
FBtr0301476;FBtr0113105;FBtr0071777	Oatp58Dc	3	0.0287463	0.0321499	0.0342745	0.0477266	0	0.0678846	0.68841	0.865473	0.894837	0.931197	1	0.938354	0.881	0.841208
FBtr0071787	CG3045	2	0.100515	0.00900926	0.196965	0.880305	0.974609	0.944119	0.94328	0.150148	0.195915	0.111393	0.664384	1	0.889518	0
FBtr0071795;FBtr0071794;FBtr0071793;FBtr0071791;FBtr0071796;FBtr0342980;FBtr0113104;FBtr0302298;FBtr0071792;FBtr0302295;FBtr0302297;FBtr0302296	Vrp1	5	0.0344176	0.0226557	0.0150724	0.0484855	0.0701579	0	0.00080858	0.0507775	0.895659	0.917784	1	0.869161	0.920449	0.862123
FBtr0342985;FBtr0342986;FBtr0071815;FBtr0071814;FBtr0071813;FBtr0071816	Gp150	3	0.048765	0.00374413	0	0.872018	0.890954	0.953253	1	0.995132	0.934755	0.898021	0.892168	0.909839	0.847724	0.917958
FBtr0071821	wrapper	5	0.120019	0	0.216929	0.128611	0.137037	0.121436	0.120019	0.147404	0.121534	0.189944	0.91295	0.809989	0.801572	1
FBtr0342989;FBtr0071822	CG13506	4	0.0553116	0.0958404	0.0142446	0.0396529	0.0515975	0.0573617	0	0.0423614	0.0169248	0.0263667	0.775941	0.82574	0.80544	1
FBtr0071835	CG6018	4	0.113381	0.13818	0.114511	0.1113	0.0755947	0.131455	0.00540948	0.101507	0	0.0886753	0.918232	0.900363	0.974821	1
FBtr0071838;FBtr0331942;FBtr0112820;FBtr0331941	px	2	0.0963445	0.0914951	0.0831703	0.26505	0.103075	0.0839298	0	0.144646	0.877584	0.941712	0.998205	1	0.977465	0.895346
FBtr0071848	T3dh	5	0.0510625	0.0331517	0	0.0694855	0.0027969	0.0235853	0.0533207	0.0266573	0.00206177	0.71758	0.760285	0.766375	0.808837	1
FBtr0071890	CG30272	5	0.0131937	0.0716238	0.0296794	0.00950605	0.0952766	0	0.0500917	0.0673084	0.906595	0.910502	1	0.856632	0.069608	0.0353052
FBtr0071905	Gmer	6	0	0.654077	0.816812	0.988346	0.881077	0.976802	0.996345	1	0.987637	0.95449	0.946759	0.916187	0.901405	0.859797
FBtr0071911;FBtr0071913;FBtr0309858;FBtr0071914	CycB	2	0.948183	1	0.959908	0.979153	0.973883	0.888228	0.948704	0.917454	0.773077	0.655889	0.546427	0.401737	0	0.0441883
FBtr0345505;FBtr0071934	Ugt58Fa	5	0.0452148	0.00759563	0.0454877	0	0.150348	0.0256819	0.0557921	0.010339	0.308687	0.369923	0.728693	0.801845	0.760107	1
FBtr0071937	Cdk9	6	0	0.830889	0.972321	0.920645	0.955071	0.932882	0.896701	0.921764	1	0.929456	0.895661	0.901351	0.895502	0.911491
FBtr0302895;FBtr0071951	CG9849	2	0.0389383	0.0753841	0.0968395	0.0256	0.113602	0	0.0341354	0.552795	0.953235	0.788214	0.961361	0.993008	1	0.761734
FBtr0071984	CG9890	2	0.87966	0.95804	0.604562	0.0492798	0.017997	0.000352329	0	0.0934688	0.722725	0.813976	0.827377	0.826845	0.752942	1
FBtr0336732;FBtr0071985	l(2)06496	6	0.00549274	0	0.00891062	0.927212	0.884454	0.87157	0.998637	0.952812	0.932264	0.909577	0.969955	0.922212	1	0.868166
FBtr0071993;FBtr0310325	CG3831	1	1	0.913018	0.854621	0.969926	0.872446	0.822941	0.87255	0.0265911	0.0412059	0.00733925	0.0749919	0.0230777	0.0131509	0
FBtr0072037	vir	6	0	0.0534084	0.363402	0.81686	0.843833	0.828311	0.901284	0.940662	0.92933	0.933417	0.982422	0.975173	0.900111	1
FBtr0072064	Pi3K59F	1	0.873317	1	0.965928	0	0.0584589	0.0652009	0.0013278	0.832444	0.880576	0.8808	0.939427	0.0170206	0.0886237	0.0889564
FBtr0340029;FBtr0072072;FBtr0072073;FBtr0340030;FBtr0340031	retn	2	0.0417283	0	0.654069	0.869952	1	0.877619	0.801238	0.655118	0.472581	0.496935	0.0365438	0.0605147	0.366426	0.338272
FBtr0072097;FBtr0072098;FBtr0072096	CG4091	2	0.0649295	0.151683	0.104884	0.0711661	0.0469877	0.0478673	0.0187607	0.0371986	0	0.110415	0.916404	0.889954	1	0.0131709
FBtr0072151	Alas	5	0.628706	0.605815	0.471238	0.657613	0.576543	0	0.0474796	0.461383	0.390573	0.636366	0.750691	0.897064	0.804138	1
FBtr0072153;FBtr0072155;FBtr0072154	CG3065	2	0.120764	0.178584	0.0223771	0.156705	0.138293	0.10527	0	0.160555	0.130092	0.0940305	1	0.961285	0.991789	0.956341
FBtr0072165	CG3163	6	0.0318204	0.107738	0	0.55792	0.554626	0.650126	0.670993	0.750277	0.852314	0.939096	0.952084	0.981791	0.922019	1
FBtr0072203;FBtr0072202	Phm	4	1	0.75386	0.688295	0.0399167	0.103768	0	0.0555729	0.0352201	0.791221	0.652071	0.868649	0.847561	0.913077	0.804359
FBtr0343280;FBtr0072210	CG3735	6	0	0.414191	0.754466	0.788454	0.731044	0.763148	0.748744	0.801032	0.778725	0.833048	0.884259	0.966798	0.891107	1
FBtr0072241	Nxt1	6	0.0313859	0	0.0161505	0.727665	0.692777	0.745727	0.710061	0.828311	0.916175	0.876898	0.901942	1	0.841063	0.924591
FBtr0343339;FBtr0072250	enok	6	0	0.0262394	0.968429	0.990293	0.971116	0.966974	0.950897	0.989301	0.992824	0.982911	1	0.990083	0.937356	0.98038
FBtr0343432;FBtr0072253	Zfrp8	6	0	0.0761401	0.0943896	0.0935027	0.0745047	0.974531	0.895641	1	0.952104	0.984521	0.945781	0.9841	0.906225	0.881788
FBtr0072285	CG4049	2	0.111632	0.0674166	0.0819038	0.0649293	0.0781979	0.0960906	0.130105	0	0.838956	0.943528	0.931169	1	0.908222	0.161686
FBtr0072315	CG3548	5	0	0.0425777	0.0593752	0.0650107	0.0470691	0.0161736	0.0282305	0.0415292	0.911332	0.694842	0.824596	0.932899	0.903076	1
FBtr0072332	CG4806	6	0	0.00170437	0.119707	0.674531	0.744648	0.739712	0.755951	0.802061	0.835068	0.903442	0.95712	1	0.945654	0.998717
FBtr0072338	CG4707	2	0.133705	0.0460389	0	0.0707641	0.0653828	0.0439461	0.060764	0.00174589	0.978971	1	0.918131	0.799418	0.852684	0.827124
FBtr0300490;FBtr0072344	CG4622	6	0	0.0354675	1	0.870943	0.813123	0.869293	0.86633	0.79641	0.800745	0.835342	0.849697	0.924384	0.971506	0.959545
FBtr0072374	Eap	2	0.101368	0.149962	0.0102341	0	0.0302174	0.0707687	0.058545	0.0443314	0.0822369	0.0681357	0.805202	0.94212	1	0.896561
FBtr0072375	CG3589	1	1	0.894478	0.748944	0.0757568	0.100928	0.0721838	0.0353135	0.0572955	0.0822949	0.123838	0.0630857	0.0903455	0	0.0985591
FBtr0072392	CG3760	3	0.053132	0.0536599	0.0148224	0.0206651	0	1	0.859331	0.8312	0.922534	0.963123	0.878137	0.957546	0.982602	0.840714
FBtr0343506;FBtr0072396	CG3829	5	0.0792962	0.0719675	0.0370818	0.00186884	0	0.0106318	0.0686706	0.0670617	0.863259	1	0.947037	0.876544	0.73225	0.815554
FBtr0345678;FBtr0072397	uzip	5	0.758987	0.727427	0.683807	0.0141756	0	0.812444	0.786855	0.798793	0.825656	0.891124	0.908691	0.91107	0.874299	1
FBtr0343508;FBtr0343507;FBtr0072402;FBtr0072400;FBtr0072401	emp	4	0.0348146	0.0312612	0.0587965	0.027688	0.00151464	0.0241458	0.0332278	0.0235095	0	0.0216768	0.577458	0.738188	0.721246	1
FBtr0072403	CG2736	4	0.0932403	0	0.157944	0.085112	0.0880307	0.0139104	0.0022227	0.0978783	0.0955318	0.0221718	0.052295	0.748288	0.733944	1
FBtr0072481;FBtr0072480;FBtr0346614	mri	6	0	0.0323583	0.961817	1	0.92364	0.816716	0.896472	0.930191	0.935174	0.873831	0.891866	0.882458	0.950608	0.820012
FBtr0332839;FBtr0332838;FBtr0072506;FBtr0332837;FBtr0332836	miple2	5	0.679019	0.628196	0.649939	0.537748	0	0.0295323	0.706652	0.620859	0.614441	0.850837	0.954497	0.982599	1	0.877247
FBtr0332110;FBtr0332109;FBtr0072520;FBtr0305325;FBtr0332108	DIP2	6	0	0.0644496	0.863102	0.817769	0.779973	0.83784	0.966735	1	0.945598	0.961024	0.949817	0.908343	0.949565	0.980306
FBtr0332103;FBtr0332104;FBtr0301348;FBtr0072521;FBtr0332102;FBtr0072522;FBtr0332101	E(bx)	2	0.214752	0.137581	0.238978	0	0.145977	0.259432	0.248274	0.199026	0.975623	0.977453	0.89217	0.896182	0.927722	1
FBtr0072561	Reg-2	5	0.0874803	0.0464612	0	0.173405	0.113108	0.0685989	0.107958	0.0832005	0.0684806	0.653486	0.790971	0.87195	0.842388	1
FBtr0072576	CG32344	6	0	0.059434	0.0410523	0.576461	0.648812	0.657482	0.730505	0.813348	0.854209	0.888063	0.9365	0.979674	0.927468	1
FBtr0345005;FBtr0072593	CG13907	5	1	0.591513	0.484639	0.104149	0	0.512535	0.196301	0.604107	0.701637	0.68102	0.851437	0.823283	0.829464	0.904836
FBtr0331403;FBtr0072596	CG13901	6	0.0489414	0.130028	0	0.965387	0.991446	0.965229	0.990727	0.981064	1	0.924534	0.928301	0.903079	0.905933	0.816275
FBtr0072635	CG9119	4	0.048785	0.0579081	0.0675731	0.0427757	0.0831292	0.115736	0	0.060239	0.0951136	0.0953425	0.0783292	0.719375	0.703148	1
FBtr0333271;FBtr0072639	bab2	5	0.0643059	0.0579231	0.043572	0.0612423	0.0595214	0.0420751	0	0.0863972	0.889585	0.943402	0.972081	1	0.926935	0.999226
FBtr0072645;FBtr0072644	trio	3	0.00303561	0	0.872749	0.743779	0.710043	0.823806	0.931257	0.888291	0.906331	0.966173	0.95003	0.951756	0.992628	1
FBtr0072673;FBtr0072672;FBtr0072675;FBtr0072674	Myo61F	4	0.10259	0	0.0705335	0.0763756	0.0462901	0.037679	0.0768194	0.0517875	0.0471383	0.0193847	0.600533	0.614002	0.735797	1
FBtr0072679	l(3)02640	3	0.0817351	0	0.0955854	0.665947	0.722398	0.743773	0.737329	0.621397	0.82351	0.788695	0.843562	0.908439	0.818656	1
FBtr0072706	cue	1	1	0.801801	0.668847	0.390874	0.430256	0.33036	0.292345	0.260666	0.232263	0.0422296	0.114688	0.108882	0.142739	0
FBtr0072726;FBtr0072725	CG9184	5	0.416936	0.360986	0.358314	0	0.247912	0.402882	0.0984261	0.233567	0.270949	0.310556	0.761551	0.949062	0.904583	1
FBtr0331867;FBtr0072729;FBtr0345006	CG2277	6	0.0627403	0	0.0553041	0.736759	0.716897	0.787328	0.833023	0.866424	0.865942	0.922957	0.918246	0.940212	0.893408	1
FBtr0072733	Klp61F	2	0.573367	0.664379	0.882654	0.896803	0.936129	0.946919	1	0.974888	0.926241	0.827227	0.181885	0.098031	0.312064	0
FBtr0346593;FBtr0072761	CG13920	4	0	0.0872266	0.0709486	0.0376494	0.00414364	0.00606624	0.0151492	0.0124123	0.0426268	0.0718482	0.0218714	0.0148185	0.811762	1
FBtr0072764	CG12011	3	0.288972	0	0.0762919	0.0935035	0.0723569	0.285986	0.361876	0.65149	0.763809	0.872884	1	0.95755	0.996639	0.928704
FBtr0301625;FBtr0072781;FBtr0072779	Patj	6	0	0.600061	0.895158	0.969449	1	0.961615	0.937127	0.945108	0.900966	0.914728	0.866321	0.761448	0.840881	0.813362
FBtr0072791	CG2021	6	0	0.742249	0.645287	0.829337	0.8959	0.905168	0.90578	0.877927	0.943878	0.943582	1	0.973111	0.991203	0.913529
FBtr0332881;FBtr0072792	CG13933	1	1	0.169979	0.119536	0.0868226	0.183051	0.105469	0	0.0705105	0.093514	0.101253	0.0902522	0.0609748	0.0763263	0.0628488
FBtr0072822	CG13928	4	0.0415553	0.0819479	0.0021014	0.0489412	0.0342528	0.038996	0.0619083	0.039339	0	0.551961	0.790101	0.896366	0.785027	1
FBtr0072827;FBtr0072826	CG7879	6	0.00798816	0	0.0373574	0.814048	0.758374	0.856115	0.849231	0.860181	0.878109	0.804299	0.872563	0.916558	1	0.94517
FBtr0345381;FBtr0332668;FBtr0072834	CG12025	2	0.123533	0.0572431	0.0635057	0.162246	0	0.0435445	0.940108	0.883936	0.0531205	0.104837	1	0.847773	0.782218	0.956436
FBtr0072878	CG13807	2	0.129376	0.120187	0.128429	0.138842	0.17539	0.0856643	0	0.141549	0.101561	0.971587	0.915037	1	0.952001	0.999763
FBtr0072883	yellow-g2	4	1	0.788375	0.558827	0.413882	0.425534	0.199384	0.317321	0.00585276	0.00419668	0.0322327	0.0347227	0.0289425	0	0.0402946
FBtr0072890	CG9004	6	0	0.0146876	0.0261304	0.814165	0.743645	0.714708	0.798032	0.830377	0.895793	0.874994	0.940278	0.984647	0.953553	1
FBtr0072899	CG15877	6	0.0679566	0.0382408	0	0.0527076	0.59832	0.683743	0.794719	0.778682	0.897572	0.863736	0.872709	0.971037	1	0.911263
FBtr0072902	yellow-g	4	1	0.819322	0.540571	0.322998	0.353833	0.223196	0.179428	0.00959926	0	0.0277831	0.0146464	0.0139983	0.0219517	0.00967968
FBtr0072908;FBtr0072906;FBtr0072907;FBtr0072905	CG1275	5	0.039296	0.0937492	0.0939019	0.861512	0.76884	0	0.100766	1	0.805155	0.86429	0.802662	0.0494628	5.45224e-05	0.0629131
FBtr0072913	CG15820	1	1	0.966887	0.745362	0.687042	0.775833	0.646371	0.556489	0.0522617	0.0276891	0.0399773	0.00982322	0	0.0198547	0.0540195
FBtr0346076;FBtr0072915	CG5704	1	1	0.0172684	0	0.0638395	0.0591827	0.0441926	0.00999275	0.0152301	0.0485341	0.00561994	0.028604	0.0286816	0.0142707	0.086819
FBtr0072954;FBtr0072953;FBtr0072952;FBtr0072951	Pxn	4	0.658624	0.421492	0.363713	0.0847468	0	0.106159	0.0717127	0.110863	0.389903	0.513798	0.744056	0.789464	0.795507	1
FBtr0072965;FBtr0072966;FBtr0072964;FBtr0072963;FBtr0306577;FBtr0331414	CG16758	5	0.0464516	0.11848	0.0946725	0.0714809	0.0136369	0	0.0679786	0.267444	0.763378	0.81421	0.860186	0.926244	0.974611	1
FBtr0333442;FBtr0072973;FBtr0072972	pgant6	2	0.615918	0.459834	0.290303	0.0460609	0.103833	0	0.279666	0.295878	0.524799	0.634099	0.87115	0.963899	0.85833	1
FBtr0072990	CG16753	6	0.105355	0	0.698791	0.829955	0.767192	0.740557	0.790448	0.790583	0.915807	0.855955	1	0.967551	0.960959	0.999818
FBtr0073004	CG32486	3	0.24406	0	0.253715	0.351893	0.184052	0.341959	0.582566	0.650454	0.815975	0.810631	0.901549	1	0.951595	0.90912
FBtr0073015	CG12093	2	1	0.821147	0.722492	0.0291462	0.0125109	0	0.65593	0.585166	0.427027	0.447966	0.527995	0.656826	0.52284	0.609617
FBtr0073028;FBtr0073027	pfk	6	0	0.0351393	0.851289	0.889315	1	0.877116	0.0215468	0.0106481	0.874271	0.859049	0.924371	0.973919	0.900373	0.962858
FBtr0308314;FBtr0073053	CG12009	4	0.105223	0	0.0550534	0.0522256	0.052319	0.0390734	0.0501385	0.0267395	0.0494143	0.0790657	0.270435	0.601972	0.686645	1
FBtr0073115;FBtr0073117;FBtr0073116;FBtr0333894;FBtr0113133;FBtr0113132	CG11537	5	1	0.935629	0.910727	0.887397	0.820153	0.903996	0.893487	0.822609	0.61883	0.0401766	0.000497242	0.044554	0.0032215	0
FBtr0073124	Cht7	4	0.0626953	0.04186	0.023611	0.074931	0	0.0911309	0.0290766	0.028144	0.0427324	0.25854	0.471933	0.59211	0.634924	1
FBtr0073141	ImpE2	5	0.0546569	0.00989173	0.024095	0.00158625	0.0328748	0	0.0661109	0.024149	0.0182927	0.0194907	0.79465	0.900458	0.962098	1
FBtr0073205	dib	6	0.0147949	0.083699	0	0.8067	0.839685	0.968695	0.971965	0.980924	0.937484	1	0.888553	0.876396	0.885624	0.837926
FBtr0073212	Ras64B	3	0.05301	0	0.0699883	0.811088	0.757249	0.698198	0.734337	0.790172	0.81449	0.823503	0.949233	0.932412	0.918277	1
FBtr0073217	Ero1L	3	0.961551	0.852632	0	0.00330661	0.0322313	0.831815	0.682132	0.861173	0.872424	0.866502	0.961257	1	0.884685	0.992966
FBtr0073223	Cpr64Ad	4	0.0769761	0.0880581	0	0.040184	0.0504083	0.0542022	0.0703983	0.0506512	0.0139911	0.0638893	0.65561	0.714338	0.811231	1
FBtr0073231	CG1273	5	0.0879483	0.0533851	0	0.0899051	0.103054	0.075028	0.103097	0.0630272	0.0557297	0.046666	0.896586	0.959422	1	0.924949
FBtr0073242	CG11583	6	0.306119	0	0.415913	0.724582	0.706995	0.733292	0.747223	0.777326	0.832551	0.872361	0.947013	1	0.913954	0.989728
FBtr0073247;FBtr0073246;FBtr0073245	ago	6	0.00898477	0	1	0.84757	0.900812	0.803597	0.862189	0.790645	0.796125	0.711481	0.726526	0.720564	0.677038	0.747519
FBtr0073270;FBtr0310531	Chd64	3	0	0.589265	0.650195	0.740117	0.783999	0.809288	0.847992	0.807238	0.816657	0.816834	0.84527	0.884704	0.968631	1
FBtr0309972;FBtr0073375	Con	5	0.0309265	0.0797509	0	0.0441912	0.0603453	0.0560415	0.0521235	0.0526308	0.547772	0.675524	0.850321	0.98754	0.851626	1
FBtr0343639;FBtr0112977;FBtr0112976;FBtr0112975;FBtr0073376	CG15211	4	0.0208514	0	0.0620152	0.0613153	0.0561586	0.074114	0.0737873	0.0942601	0.257834	0.38921	0.702437	0.782281	0.729359	1
FBtr0346273;FBtr0073409	sofe	2	0.702084	0.686658	0.790342	0.799643	0.838078	0.739978	0.759	0.806202	1	0.0474356	0.00909117	0	0.0154202	0.016261
FBtr0073410	feo	2	0.841627	0.863124	1	0.889062	0.892686	0.915501	0.931197	0.940155	0.875162	0.719293	0.580025	0.473489	0.578814	0
FBtr0073437;FBtr0330387	CG18292	6	0	0.650449	0.7145	0.756151	0.786534	0.799399	0.829289	0.852924	0.894386	0.858857	0.936085	0.990006	0.985597	1
FBtr0073451	CG1738	2	0.0408765	0.0549639	0.0977979	0.0654476	0.0559887	0	0.0721999	0.062637	0.745402	0.889486	0.905671	1	0.962217	0.933519
FBtr0340049;FBtr0073453;FBtr0340050	CG1737	6	0	0.191757	0.251744	0.641303	0.6595	0.655495	0.704145	0.810732	0.891466	0.883962	0.943522	0.981499	0.899123	1
FBtr0333262;FBtr0073486;FBtr0308088;FBtr0333261;FBtr0301289;FBtr0073487;FBtr0073485;FBtr0308089;FBtr0073489;FBtr0330390;FBtr0112812;FBtr0073490;FBtr0112813;FBtr0073488;FBtr0301288	dlg1	3	0	0.041451	0.236183	0.756768	0.839716	0.896876	0.953102	0.987667	0.982867	1	0.993268	0.903222	0.910439	0.917224
FBtr0343563;FBtr0343562;FBtr0073495;FBtr0073494;FBtr0343561;FBtr0073496	Gs2	5	0.0563785	0	0.0440942	0.0416541	0.0847627	0.100231	0.149246	0.0660422	0.0362921	0.830325	1	0.817249	0.891399	0.874671
FBtr0340297;FBtr0073516	nod	2	0.0401662	0.118051	0.0783077	0.0583858	0	0.733238	0.921632	1	0.927634	0.00869025	0.0531657	0.0410497	0.0561822	0.0649426
FBtr0073519;FBtr0073518	rho-4	6	0	0.65519	0.959387	0.956883	0.95136	0.936285	0.964148	1	0.961752	0.95195	0.942274	0.896035	0.89571	0.933851
FBtr0331406;FBtr0273235;FBtr0073522;FBtr0330394;FBtr0330393;FBtr0330392	Ptp10D	5	0.0369788	0	0.904581	1	0.910911	0.733372	0.0113676	0.0429957	0.0405451	0.0531976	0.826374	0.811838	0.749445	0.946372
FBtr0073540	e(y)2	6	0.0231081	0.00356008	0	0.932093	0.801716	0.771144	0.823971	0.94924	0.91844	0.817806	0.882695	1	0.789899	0.80298
FBtr0073541	Kmn1	2	0	0.0381665	0.0641233	0.912899	0.939227	0.713409	0.879106	0.990643	1	0.970299	0.0448021	0.0579549	0.0382985	0.0814803
FBtr0339694;FBtr0339693;FBtr0073544;FBtr0073543	CG1572	4	0.119391	0.112843	0.0999617	0.104107	0.133089	0.123962	0.0908378	0.105381	0.142982	0.10355	0.0431693	0	0.150369	1
FBtr0073620	FucT6	2	0.0369517	0.00647049	0.0662743	0.00220283	0.039934	0.0220493	0	0.728682	1	0.789163	0.83753	0.90352	0.719972	0.855106
FBtr0331718;FBtr0073662;FBtr0273245	CG11138	5	0	0.167793	0.139143	0.160373	0.125204	0.113494	0.127533	0.116746	0.838125	0.790548	0.884773	0.979323	0.929321	1
FBtr0305591;FBtr0073690	CG3775	4	1	0.91943	0.818468	0.941281	0.0688603	0.0466006	0.0269247	0.0455326	0.0925303	0.0833537	0.0493094	0.138092	0.099019	0
FBtr0346316;FBtr0343649;FBtr0073692	CG4645	2	0	0.0365645	0.0642472	0.0726582	0.0831108	0.0155228	0.0636826	0.0789358	0.00884228	0.0956518	0.852035	0.832598	0.910146	1
FBtr0073732;FBtr0310647;FBtr0340190;FBtr0073731;FBtr0310648;FBtr0330398	mew	3	0	0.0253217	0.0178093	0.691677	0.796564	0.822162	0.856112	0.873011	0.828706	0.843892	0.965732	0.910538	0.867795	1
FBtr0346618;FBtr0073766	CG15747	6	0.123043	0.0592493	0.0306657	0	0.0785163	0.85964	0.862251	0.84657	0.84714	0.797061	1	0.8894	0.990926	0.834258
FBtr0073777	CG1673	3	0	0.0529683	0.0350077	0.891087	0.87471	0.926445	0.922949	0.961693	0.791486	0.807157	0.78428	0.910197	0.853342	1
FBtr0073779;FBtr0301559	Set2	6	0.0454565	0	0.0226301	0.928325	1	0.896971	0.954633	0.969293	0.917904	0.857593	0.895721	0.8572	0.842303	0.859196
FBtr0100168;FBtr0073789	Yippee	6	0	0.0673842	0.0508634	0.685561	0.722591	0.637063	0.743106	0.738065	0.847357	0.766872	0.961439	0.931004	1	0.915241
FBtr0339838;FBtr0073790;FBtr0304001	Rbp1-like	6	0.00549264	0	0.0314667	0.679545	0.659122	0.671707	0.648478	0.814068	0.874421	0.900216	0.939014	0.961388	0.993321	1
FBtr0331722;FBtr0073807;FBtr0340395;FBtr0308644	Tango2	6	0.00736988	0.108662	0.0223092	0	0.101119	0.930828	0.932122	0.965781	1	0.82225	0.918203	0.856137	0.906492	0.761027
FBtr0073820	Rtc1	6	0.0188085	0	0.0102939	0.769688	0.813923	0.797997	0.825403	0.862651	0.866628	0.866534	0.953216	0.970944	0.908557	1
FBtr0346119;FBtr0340399;FBtr0073846	CG12177	3	0	0.0222779	0.090805	0.0531027	0.0549628	0.71367	0.893614	0.987578	0.984069	0.911161	0.915451	0.873348	1	0.94257
FBtr0340191;FBtr0073848	CG2691	6	0	0.0249305	0.00205763	0.575692	0.651097	0.653674	0.692773	0.73642	0.777193	0.814538	0.903297	0.894027	0.886955	1
FBtr0346118;FBtr0073849	tth	2	0.0244899	0.0665469	0.0645501	0.053548	0	0.0786836	0.0331402	0.0267339	0.0592436	0.00604731	0.880212	0.890044	0.919185	1
FBtr0100561;FBtr0340618;FBtr0340617;FBtr0310138;FBtr0073852;FBtr0310137;FBtr0310136;FBtr0073851;FBtr0301919;FBtr0301921;FBtr0301920;FBtr0345131;FBtr0073853	up	4	0.0373628	0	0.0674972	0.00934729	0.135458	0.0982285	0.0392704	0.0371069	0.0445699	0.033604	0.0571963	0.0150998	1	0.961002
FBtr0073898;FBtr0073897	yl	1	1	0.892113	0.755224	0.474497	0.472121	0.253916	0.226994	0.312874	0.243681	0.18604	0.209161	0.173506	0.0966298	0
FBtr0073959;FBtr0073958	CG5541	4	1	0.756074	0.673976	0.615212	0.579757	0.580916	0.521728	0.530131	0.0901993	0.113242	0.064606	0.16693	0.135364	0
FBtr0073976	CG12398	2	1	0.920241	0.543325	0.822825	0.728246	0.432438	0.533716	0.390373	0.479115	0.174788	0	0.559155	0.679334	0.703747
FBtr0343380;FBtr0073978	CG9509	5	0.138106	0.13433	0	0.103755	0.134239	0.0176068	0.105134	0.14505	0.903322	1	0.864759	0.995519	0.903254	0.930841
FBtr0343381;FBtr0073979	CG9512	5	0.605858	0.591498	0.0917359	0.0933114	0.0600844	0	0.643925	0.808711	0.836176	0.739901	0.822909	0.887062	0.874932	1
FBtr0340433;FBtr0074001;FBtr0074002	CG5877	6	0	0.0944477	0.857577	0.896698	0.897245	0.854479	0.923936	0.872062	0.937295	0.911401	0.956615	0.946955	0.941672	1
FBtr0308699;FBtr0100294;FBtr0074005;FBtr0074006	Top1	6	0	0.0176557	0.0020247	0.778611	0.828587	0.916059	0.857904	0.949566	0.877853	0.882183	0.976648	0.950759	0.959989	1
FBtr0074007;FBtr0330404	dah	2	0.653041	0.778594	1	0.889815	0.913157	0.749496	0.594071	0.362586	0.264316	0.242583	0.0199912	0.00795233	0	0.000462293
FBtr0074020	CG9114	6	0.12674	0.128364	0	0.841753	0.842114	0.812747	0.775824	0.926648	1	0.9037	0.137427	0.186002	0.150321	0.932372
FBtr0074026;FBtr0340410;FBtr0330402;FBtr0112984	CG9095	4	0.0352223	0.0488649	0	0.134748	0.0486519	0.0448381	0.0682546	0.0415358	0.0305687	0.0616243	0.65268	0.846622	0.804408	1
FBtr0074031	CG11655	5	0.881347	0.869653	0.886653	1	0.952243	0.910608	0.904942	0	0.0800139	0.113426	0.786013	0.725437	0.776329	0.69353
FBtr0074039	CG6340	6	0	0.0166342	0.745824	0.690241	0.692805	0.769997	0.722276	0.834175	0.846519	0.906323	0.911182	1	0.890273	0.928377
FBtr0074042;FBtr0343525;FBtr0074043	Gmap	3	0.0190372	0	0.0189535	0.855813	0.832544	1	0.987128	0.96334	0.976036	0.96181	0.935986	0.963083	0.995735	0.995249
FBtr0339691;FBtr0074045	CG7860	5	0.0322473	0	0.0520544	0.0570477	0.0239384	0.101418	0.0626863	0.122072	0.0873059	0.0692461	0.852481	0.911163	0.931695	1
FBtr0074058	Pis	5	1	0.842899	0.808719	0.831224	0.809958	0.961707	0.0208343	0	0.839459	0.848387	0.832414	0.831771	0.876399	0.846165
FBtr0074060;FBtr0308614	CG9240	6	0.0669533	0.0352477	0.0101437	0.0250562	0	0.987666	1	0.912832	0.799784	0.93308	0.957496	0.997778	0.941859	0.946025
FBtr0332591;FBtr0074079	Scamp	6	0	0.02308	0.918707	0.911197	0.968979	1	0.914556	0.908402	0.929801	0.890554	0.986005	0.935887	0.94937	0.908774
FBtr0346188;FBtr0074087	CG8239	3	0.0333922	0	0.00457846	1	0.896735	0.928902	0.947897	0.932442	0.928944	0.895124	0.842517	0.831596	0.831231	0.895252
FBtr0308132;FBtr0308130;FBtr0074101;FBtr0074100;FBtr0340115;FBtr0346799;FBtr0308134;FBtr0308133;FBtr0308128;FBtr0112824;FBtr0308131;FBtr0301544;FBtr0301543;FBtr0310313;FBtr0310312;FBtr0308129;FBtr0112827;FBtr0112826;FBtr0112825;FBtr0074099;FBtr0310311	sd	5	0.0730993	0.129068	0	0.061289	0.0131291	0.0645912	0.093585	0.0247287	0.00208918	0.0412367	1	0.986211	0.866314	0.871716
FBtr0346189;FBtr0340116;FBtr0074104	CG8578	6	0	0.0226439	0.0480988	0.822577	0.828524	0.870045	0.924977	0.893639	0.913524	0.901682	0.922125	0.909612	1	0.912254
FBtr0074130	CG8924	6	0.0756496	0	0.0747267	1	0.900326	0.910488	0.930782	0.873436	0.902457	0.873183	0.780109	0.717724	0.0602267	0.0635794
FBtr0074138	CG8939	6	0.0159453	0	0.0284343	0.486367	0.487631	0.571076	0.651971	0.721388	0.78008	0.82542	0.942281	0.96825	0.874873	1
FBtr0074173;FBtr0074171;FBtr0074170;FBtr0074169	Myb	2	0.105085	0.148052	0.0828494	0.177115	0.0615288	0.236255	0.0160189	0.126784	0	0.902164	0.88646	0.968943	0.90302	1
FBtr0074201	CG8944	6	0	0.00250239	0.789336	1	0.992147	0.94951	0.969962	0.905872	0.98301	0.97271	0.978617	0.972621	0.924431	0.971838
FBtr0343519;FBtr0308619;FBtr0074214;FBtr0074212;FBtr0074211	eas	3	0.0969126	0.0382185	0	0.907491	0.876892	0.949314	1	0.913449	0.889885	0.961471	0.844227	0.853285	0.922173	0.946268
FBtr0336977;FBtr0074222	CG3679	2	0.741524	0.865973	1	0.904587	0.954254	0.87862	0.864919	0.800081	0.594471	0.0219081	0.0293241	0.0391386	0	0.00757967
FBtr0074230	sl	6	0	0.02863	0.834229	0.725811	0.78834	0.812288	0.832195	0.883893	0.891549	0.7552	0.823076	0.887883	1	0.850618
FBtr0346059;FBtr0074240	CG9914	3	0.00207951	0.0376775	0	0.773267	0.70297	0.741127	0.793384	0.739914	0.715855	0.618604	0.752083	0.727307	0.878074	1
FBtr0074245;FBtr0100556	CG32576	3	0.993546	1	0.968867	0.927252	0.876215	0.874297	0.870851	0.888413	0.795158	0.88659	0.925157	0.939043	0.827747	0
FBtr0340315;FBtr0074305	TH1	6	0	0.0460172	0.0313478	0.804504	0.755588	0.816961	0.855256	0.839539	0.838302	0.83648	0.889392	0.950331	0.90691	1
FBtr0340150;FBtr0074314	mthl1	6	0.113281	0.123444	0.14493	0	0.145206	0.112039	0.945874	0.979687	1	0.95273	0.925768	0.960283	0.864562	0.94442
FBtr0074326	TwdlY	4	0.0119277	0.00187708	0.0445079	0.016567	0.0422482	0	0.00702703	0.0337717	0.00312483	0.0666131	0.0346599	0.0477856	0.834423	1
FBtr0074339	CG4872	2	0.116361	0.0886104	0.00749178	0.738134	0.843904	0.69178	0.00135348	0.0571906	0.92486	0.850968	0.899689	0.833205	1	0
FBtr0310519;FBtr0074342	CG4880	2	0.832497	0.985071	1	0.98627	0.985905	0.94582	0.864057	0.832382	0.733119	0.58262	0.00283911	0	0.0756352	0.0383602
FBtr0301352;FBtr0301354;FBtr0301353;FBtr0074357	if	5	0.0669296	0.00790989	0.000379786	0.0204573	0.0175698	0	0.0299525	0.014444	0.775739	0.754115	0.860151	0.891675	0.892038	1
FBtr0340358;FBtr0334461;FBtr0074385;FBtr0074384;FBtr0334460	CG4991	1	1	0.855731	0.674913	0.537564	0.0522754	0.054937	0	0.0456241	0.0293021	0.0622718	0.0671773	0.0187084	0.03279	0.0316126
FBtr0074386;FBtr0302376;FBtr0302375	CG5004	3	0.0121333	0.150845	0.98069	0.969994	1	0.929156	0.93475	0.841025	0	0.0147229	0.0679698	0.851053	0.780391	0.968019
FBtr0074387	CG5010	4	1	0.954596	0.944638	0.704739	0.759432	0.788549	0.737163	0.710955	0.0355682	0.0437321	0.0188874	0	0.0282166	0.0350028
FBtr0304839;FBtr0304840;FBtr0074412;FBtr0310524;FBtr0330596;FBtr0310525	CG8949	6	0	0.0650892	0.109157	0.974951	0.966586	0.928033	0.956304	0.947248	0.969643	0.993791	1	0.97655	0.892822	0.975977
FBtr0074417	CG13001	6	0.00921694	0.117481	0.0296678	0.0393515	0	0.0360655	0.872209	0.930991	1	0.930448	0.97106	0.991806	0.919813	0.857272
FBtr0074441	Fim	3	0	0.734276	0.812272	0.788793	0.801333	0.82262	0.855779	0.846123	0.85508	0.974536	0.921224	0.973062	0.897483	1
FBtr0074453	CG5800	6	0.0222379	0	0.586814	0.680957	0.603095	0.725276	0.62459	0.778162	0.854083	0.877964	0.920279	0.992659	0.884277	1
FBtr0074454	beta-Spec	3	0.0638137	0.0230662	0.0256588	0	0.011424	0.6207	0.833367	0.823343	0.854934	0.837874	0.928871	0.888838	0.946413	1
FBtr0342784;FBtr0074462	CG6398	6	0.0477194	0	0.828386	0.886622	0.966293	0.970665	0.988657	0.945988	0.894246	0.893965	0.93473	0.903131	0.950364	1
FBtr0074475	CG8173	6	0.0274311	0	0.8907	0.958157	0.982215	0.978834	1	0.962851	0.966321	0.950747	0.845427	0.787244	0.871338	0.860304
FBtr0346186;FBtr0340633;FBtr0100463;FBtr0074476	CG8188	2	0.951986	1	0.978375	0.957688	0.980665	0.93686	0.903712	0.923097	0.793349	0.68935	0.533523	0.701181	0.743638	0
FBtr0340623;FBtr0074484	CG8289	6	0.382805	0.0341316	0	0.425012	0.472124	0.511119	0.607507	0.769248	0.841899	0.908385	0.935369	1	0.954602	0.98274
FBtr0074486	CG8326	2	0.111631	0.0486253	0	0.105255	0.064537	0.113235	0.106287	0.761954	1	0.816693	0.84005	0.879146	0.844244	0.852248
FBtr0074509	Dhc16F	4	0.963012	0.976522	1	0.0591291	0.0316383	0.00113601	0.0353795	0.0419175	0.0125812	0.0792454	0.0182795	0.040367	0.004207	0
FBtr0074510;FBtr0339540	dik	6	0.00402862	0	0.746467	0.818263	0.924416	0.842456	0.811872	0.879724	0.778255	1	0.864614	0.923393	0.822222	0.841939
FBtr0074514	Taf8	6	0.0534122	0	0.727334	0.849936	0.953734	0.815255	0.887544	0.923071	0.948234	0.867857	0.953346	0.978063	0.944898	1
FBtr0336897;FBtr0336896;FBtr0336895;FBtr0074520;FBtr0308237;FBtr0074526;FBtr0074525;FBtr0074523;FBtr0074522;FBtr0074521;FBtr0308236	wupA	4	0.0263931	0.0467555	0.00574894	0.0681005	0.0337851	0.0667495	0.0321766	0	0.00589233	0.0339136	0.616858	0.701092	0.834851	1
FBtr0074540	CG7772	5	0.576869	1	0.742631	0.737117	0.807239	0.834663	0.00889719	0	0.0270052	0.781419	0.863653	0.802099	0.830007	0.860054
FBtr0074558	CG6179	6	0	0.0198297	0.0899021	0.889837	0.874799	0.876177	0.90163	0.903595	0.994676	0.922655	0.992397	1	0.958329	0.963779
FBtr0074593	Aats-his	2	0.680849	0.827531	0.642576	0.886524	0.787237	0.842721	0.888223	0.944166	0.965971	1	0.821744	0.143059	0.179091	0
FBtr0074602	fu	6	0	0.924788	0.962466	0.986654	0.941495	1	0.971947	0.958414	0.938119	0.939942	0.901817	0.864871	0.829535	0.85098
FBtr0342846;FBtr0074603	phm	6	0.0917406	0	0.13977	0.779935	0.872972	0.955867	1	0.986643	0.960754	0.955935	0.937678	0.972098	0.884449	0.959293
FBtr0074612;FBtr0074613	CG6659	2	0.0520902	0.0837547	0.0244524	0.925316	0.962116	0.861956	0.920373	1	0.0229537	0	0.0953052	0.847065	0.926164	0.895337
FBtr0074615	CG6617	6	0	0.723965	0.871111	0.920729	0.914877	0.889834	0.908258	0.924937	0.961223	0.919391	0.965407	0.914314	1	0.899705
FBtr0074631;FBtr0334453;FBtr0074632	CG6891	5	0.0210513	0.0118906	0.0163155	0.0150543	0.0142457	0.00484986	0	0.0339624	0.706489	0.772427	1	0.996942	0.983651	0.963634
FBtr0074652;FBtr0342879;FBtr0342880	CG7358	6	0.0435428	0.0610965	0	0.862879	0.891244	0.928044	0.941274	1	0.984851	0.955143	0.982922	0.976296	0.964217	0.989109
FBtr0074659;FBtr0074658;FBtr0074657;FBtr0074656	bnb	6	0.361501	0	0.167732	0.688927	0.748229	0.815038	0.867103	0.882445	0.886541	0.902214	1	0.94349	0.921064	0.878142
FBtr0074661	CG18259	2	0.0716002	0.0988818	0	0.0566071	0.0610202	0.0921981	0.158809	0.104255	0.103218	0.996563	0.878747	1	0.808575	0.901365
FBtr0074669	Mec2	4	0.122795	0.172223	0	0.184818	0.00783566	0.145197	0.151588	0.156795	0.108637	0.17736	0.901783	1	0.979321	0.147815
FBtr0344324;FBtr0074682	out	2	1	0.92692	0.802538	0.732667	0.767259	0.761672	0.691148	0.794307	0.645786	0.729272	0.732708	0.608281	0.66201	0
FBtr0074684;FBtr0301226	CG8034	5	0	0.131874	0.0106658	0.139842	0.0547431	0.122328	0.0673777	0.0954244	0.974157	0.876712	1	0.923841	0.834368	0.901119
FBtr0339440;FBtr0074717;FBtr0074716;FBtr0339439;FBtr0307194;FBtr0307193;FBtr0307192;FBtr0074720;FBtr0074719;FBtr0074718;FBtr0074715;FBtr0074714;FBtr0074713	Pfrx	3	0.0548413	0	0.0486715	0.915133	0.87825	0.909458	0.971365	0.993401	0.98583	0.993791	0.944788	0.985212	0.978389	1
FBtr0345918;FBtr0074733;FBtr0074734;FBtr0307161	CG14207	3	0.0228782	0	0.0469287	0.896923	0.901151	0.911496	0.916986	0.917074	0.945045	0.946662	0.984909	0.936019	1	0.968357
FBtr0344070;FBtr0074740	CG14210	2	0	0.0749378	0.126845	0.104417	0.666895	0.633283	0.127239	0.114611	0.819221	0.859091	0.922857	1	0.972206	0.99246
FBtr0074761	CG12237	6	0.0145065	0	1	0.841514	0.788782	0.814276	0.876812	0.815194	0.962437	0.837569	0.867177	0.776874	0.913129	0.049294
FBtr0307162;FBtr0074768	CG14220	2	0.12681	0.134352	0.0213247	0.0382771	0	0.0334521	0.0852701	0.0245636	0.85228	0.805294	0.898433	1	0.789287	0.94238
FBtr0345014;FBtr0074808;FBtr0074807;FBtr0344733;FBtr0307537	vfl	6	0	0.0547643	0.842519	0.893246	0.899065	0.955863	0.915759	1	0.840115	0.814528	0.907087	0.999109	0.111067	0.0902083
FBtr0339436;FBtr0339435;FBtr0301703;FBtr0074812	meso18E	2	0.0798824	0.0271525	0.0472536	0.0334637	0.0600693	0.0544506	0	0.0520556	0.78897	0.789348	1	0.99266	0.932209	0.956262
FBtr0332690;FBtr0074819	gig	6	0	0.0581488	1	0.803834	0.863849	0.80727	0.935037	0.838899	0.906483	0.839931	0.808176	0.802881	0.831534	0.769548
FBtr0306328;FBtr0306327;FBtr0074850;FBtr0074851;FBtr0306329;FBtr0306326;FBtr0308204;FBtr0302113	CG17233	2	0.038121	0.092807	0.0357204	0.063109	0.113739	0	0.0713399	0.842544	0.892336	0.83388	0.945224	0.941508	0.975131	1
FBtr0332726;FBtr0310476;FBtr0100666;FBtr0332153;FBtr0074882	Deaf1	2	0.0314563	0	0.0964732	0.0419354	0.0585239	0.0508706	0.0187264	0.0286698	0.0756654	0.620233	0.875621	0.9845	0.899933	1
FBtr0074946	CG9376	2	0.963666	0.949818	1	0.960295	0.000108639	0	0.798271	0.847519	0.895409	0.885089	0.868378	0.807438	0.776486	0.772996
FBtr0333862;FBtr0074953	serp	4	0.026833	0	0.0434032	0.0168464	0.0225722	0.0317047	0.0543427	0.0273473	0.062569	0.00696724	0.838676	0.899956	0.858332	1
FBtr0074961	Oat	5	0.390832	0.0314209	0.0409011	0	0.311565	0.292869	0.260754	0.388582	0.670131	0.813775	1	0.981956	0.924133	0.925825
FBtr0075005	pip	5	0.11326	0.07374	0.101718	0.138786	0.0846703	0.0830042	0	0.114776	0.0788334	0.721136	0.708487	0.936304	0.817429	1
FBtr0075007	pip	5	0.0112589	0.0159445	0.00405697	0	0.00423288	0.0444306	0.0260484	0.0423143	0.0651692	0.0797382	0.961531	0.93752	1	0.990185
FBtr0333897;FBtr0075013	pip	4	0.0365093	0.0424412	0.0434629	0.0728494	0.0730092	0.0260763	0	0.0501588	0.0898227	0.0438666	0.882258	0.971301	1	0.895292
FBtr0075017	CG9629	5	0.47083	0.369676	0.29678	0.172619	0	0.0271924	0.326091	0.62222	0.768421	0.920223	0.973519	0.949634	0.90185	1
FBtr0345391;FBtr0310276;FBtr0075018	Max	5	0.152638	0.189341	0	0.109086	0.128359	0.110345	0.184311	0.0896699	0.90701	1	0.867518	0.894683	0.989819	0.697413
FBtr0332735;FBtr0330194;FBtr0299586;FBtr0112890;FBtr0075029;FBtr0075028;FBtr0330195	fz2	3	0.974508	0	0.0174175	0.844654	0.842627	0.905417	0.887066	0.93054	0.816017	0.777719	0.902011	0.960824	0.868097	1
FBtr0075043;FBtr0332651;FBtr0075042;FBtr0075044;FBtr0075045	CG18135	4	1	0.946155	0.945069	0.0561185	0	0.105407	0.197922	0.0703094	0.0469718	0.0620733	0.0789105	0.0499361	0.0799958	0.125457
FBtr0075053	CG6885	2	0.0558745	0.0496197	0.0250846	0.772454	1	0.899964	0.86331	0.722154	0	0.0161904	0.0287568	0.0777724	0.0648209	0.0317232
FBtr0075108	bora	2	0.0971931	0.0288721	0	0.0320094	0.926808	0.9606	1	0.0325941	0.0278953	0.0648187	0.0604094	0.0752106	0.0186157	0.0569724
FBtr0075117	CG4306	5	0.636963	0.505922	0.536694	0.0170882	0.0256033	0	0.0166732	0.012312	0.635186	0.703301	0.944743	1	0.959569	0.945806
FBtr0075151;FBtr0347013;FBtr0075149;FBtr0075150;FBtr0306814;FBtr0306813;FBtr0075148	Eip75B	5	0.0740147	0.0963339	0.0664069	0.00550003	0.0856498	0.0814982	0	0.0958034	0.92084	1	0.87095	0.86288	0.896979	0.95163
FBtr0075155;FBtr0075154	Tsp74F	4	1	0.977848	0.798566	0.431351	0.49345	0.32739	0.28359	0.272253	0.154356	0.129538	0.0678874	0	0.230414	0.382189
FBtr0075159;FBtr0273277	CG5535	1	0.979885	1	0.928097	0.818185	0.69545	0.734373	0.818406	0.036358	0.0644895	0.0363057	0.0309666	0.0365551	0	0.0374305
FBtr0075161	CG5567	3	0	0.00611368	0.00333886	0.996973	0.952709	0.997412	0.925342	0.977975	1	0.851561	0.949281	0.989346	0.95919	0.958386
FBtr0075191;FBtr0075190	Adgf-A	5	0.357541	0.225563	0.418698	0.0756997	0.24892	0.0733644	0	0.217547	0.44071	0.586059	0.938117	0.955691	0.899113	1
FBtr0333124;FBtr0075205;FBtr0333125;FBtr0075206	CycT	6	0	0.0225489	0.802711	0.997705	0.928045	0.950191	0.868359	0.974537	0.888525	1	0.998893	0.985059	0.93813	0.929332
FBtr0075233;FBtr0075232;FBtr0075234;FBtr0339898;FBtr0075235	blot	2	1	0.693503	0.648216	0.718568	0.72709	0.787172	0.763957	0.788367	0.0802849	0.0519325	0.0130161	0.0167393	0	0.0149638
FBtr0309231;FBtr0075240;FBtr0075239	Cad74A	2	0.0825272	0	0.101033	1	0.967286	0.953483	0.905296	0.915805	0.116575	0.0860492	0.0915308	0.0889262	0.0539957	0.10399
FBtr0075269;FBtr0075267	Nc73EF	5	0.803446	1	0.906554	0.817066	0.751533	0.877072	0.865626	0	0.0342262	0.663773	0.811787	0.871595	0.747731	0.82672
FBtr0075284	CG7724	4	0.0514634	0	0.0503707	0.0472711	0.0449632	0.0212636	0.0142998	0.0223143	0.0536106	0.0543442	0.0423638	0.00760306	0.0447007	1
FBtr0113174;FBtr0075305;FBtr0075300;FBtr0305577	CG11905	4	0.020158	0.0358896	0	0.0523665	0.118693	0.0174318	0.051989	0.0300177	0.0232328	0.0533886	0.527425	0.752651	0.763281	1
FBtr0307336;FBtr0075311	l(3)73Ah	2	0	0.00696817	0.000882488	0.927195	0.959425	1	0.00715164	0.00764242	0.0287816	0.851916	0.878111	0.888736	0.895946	0.956568
FBtr0304018;FBtr0075323;FBtr0075322	Nrt	6	0.270119	0	0.246985	0.840094	0.897648	0.925187	0.911399	0.945756	0.936814	0.978409	0.978182	0.980237	0.937433	1
FBtr0333607;FBtr0075325;FBtr0075324	CG9705	6	0.00231544	0.0305593	0	0.96803	0.934187	0.939952	0.961422	1	0.96902	0.925343	0.933475	0.927056	0.98044	0.895676
FBtr0075337	CG9951	6	0	0.00673709	0.100698	0.026539	0.0183313	0.992622	1	0.893668	0.89759	0.917886	0.87952	0.933629	0.0400729	0.0226126
FBtr0333610;FBtr0075346	CG13025	2	0.104925	0	0.089115	0.624636	0.762639	0.791514	0.650441	0.61448	0.0404765	0.060599	0.0413265	0.00335661	0.0321837	1
FBtr0075361	CG4098	1	1	0.980294	0.0295813	0.0813369	0.0226542	0.0348968	0.0573539	0.105714	0.0496537	0.065205	0.019842	0.0765366	0	0.0589157
FBtr0075363	spd-2	2	0.98636	0.982946	1	0.958666	0.942555	0.931809	0.950364	0.944667	0.842331	0.722904	0.0160315	0.0065964	0.0148272	0
FBtr0075371	CG13059	4	0	0.0655472	0.0436384	0.059377	0.0213343	0.0545034	0.0412051	0.0326939	0.06279	0.0571816	0.760165	0.766693	0.897544	1
FBtr0345813;FBtr0075399;FBtr0075398	Mipp1	3	0	0.0141362	0.0481614	0.481394	0.611874	0.765484	0.849498	0.909837	0.938496	0.939668	0.966939	0.957917	0.935322	1
FBtr0075483	PDCD-5	6	0.0842685	0.0856506	0	0.907131	0.99179	0.994545	0.96091	0.979037	1	0.996645	0.927298	0.912645	0.945067	0.903826
FBtr0333600;FBtr0075498	Taspase1	6	0.0496111	0.165407	1	0.777664	0.949847	0	0.0391794	0.853906	0.895667	0.943372	0.935693	0.927734	0.866089	0.965288
FBtr0332133;FBtr0075505	dbo	2	0	0.0560241	0.00438598	0.0546508	0.0617726	0.913251	0.0290017	0.0537042	0.914114	0.753996	1	0.892618	0.805215	0.730389
FBtr0333577;FBtr0075518;FBtr0330161	Hip14	6	0	0.0631082	0.10258	0.81412	0.871112	0.890937	0.895933	0.90427	0.916029	0.836414	1	0.903981	0.898393	0.899556
FBtr0075547	CG7275	6	0.0323032	0.0881288	0	0.738086	0.819855	0.822663	0.844989	0.880551	0.90443	0.943347	0.960322	0.992617	0.902868	1
FBtr0075548	CG7272	4	0.0587947	0	0.0573052	0.0607054	0.0364452	0.0503956	0.0563182	0.0128383	0.0586444	0.022846	0.974032	1	0.865167	0.0779812
FBtr0075558;FBtr0075557	CrebA	3	0.129078	0.0299248	0	0.0111959	0.0191489	0.0312888	0.827452	0.837401	0.960761	0.808481	0.962137	1	0.975663	0.978129
FBtr0075564	CG12301	6	0.0781601	0	0.303032	0.686183	0.671834	0.646928	0.654055	0.781814	0.782253	0.86996	0.898757	0.970692	0.928757	1
FBtr0075570	CG7372	6	0	0.0366446	0.821704	1	0.813592	0.911199	0.96039	0.952677	0.866072	0.885754	0.798106	0.760734	0.0334022	0.0320572
FBtr0075591	CG7650	6	0.0147088	0.0487726	0.120784	0.809192	0.90164	0.886812	0.920881	0.933303	1	0.908379	0.918805	0.916003	0.928931	0
FBtr0332095;FBtr0075592;FBtr0301186;FBtr0300329	CG7656	6	0.0904506	0.0710848	0	0.911318	0.90117	0.968215	0.985316	0.989509	1	0.995434	0.941695	0.977696	0.929886	0.97211
FBtr0075600;FBtr0075599	CG7945	6	0.0197622	0.0488152	0	0.879357	0.851406	0.912316	0.914617	0.905431	0.948495	0.932772	0.951699	1	0.980401	0.871676
FBtr0075607	Tollo	6	0.0245889	0.0407315	0	0.815016	0.858936	0.906829	0.91606	0.945482	0.901461	1	0.891447	0.873169	0.849887	0.879492
FBtr0075632	Aats-gly	3	0	0.803825	0.843142	0.984396	0.935476	0.94464	1	0.857501	0.992566	0.946935	0.891072	0.97189	0.935068	0.886859
FBtr0075677	CG9628	4	0.0359147	0.0153558	0.101661	0.104441	0.0154459	0.0371169	0.0378179	0.0423132	0	0.0319601	0.768694	0.920555	0.851559	1
FBtr0075697	gnu	1	1	0.537801	0.439004	0.0767455	0.0690746	0.0592406	0.053081	0.0409164	0.0748022	0.0581385	0.0193951	0.0740559	0	0.0957265
FBtr0100445;FBtr0075705;FBtr0075703;FBtr0333045;FBtr0333046;FBtr0100444;FBtr0075708;FBtr0075707;FBtr0075706;FBtr0075704	Trl	6	0.143196	0	0.534519	0.620431	0.618114	0.636412	0.660691	0.7309	0.739374	0.835809	0.871036	0.976372	0.820813	1
FBtr0075715;FBtr0100362;FBtr0075714	RecQ5	2	0.112033	0	0.107566	0.103361	0.0778455	0.0818515	0.115733	1	0.958355	0.865713	0.910323	0.884945	0.859082	0.963335
FBtr0333042;FBtr0075728;FBtr0333041	stwl	6	0.0232673	0	0.688551	0.939585	0.9328	0.930183	0.926388	0.983643	0.975569	0.996356	1	0.974743	0.950235	0.947497
FBtr0302433;FBtr0075774	CG6833	2	0.0248242	0.0169421	0	0.0317239	0.0482593	0.00829454	0.00270464	0.00593326	1	0.561537	0.534376	0.549248	0.476568	0.0421651
FBtr0334053;FBtr0075776;FBtr0114573;FBtr0075775	CG32138	2	0.955067	0.781309	0.850938	0.0419888	0	0.893832	0.853479	0.888812	0.914514	0.963742	0.963554	0.877762	0.83163	1
FBtr0075781	blue	1	0.00497691	0.9563	0.974351	0.0458038	0.0769841	0.0477529	0.0892537	0.0446085	0.066273	0	0.0656042	1	0.955549	0.00996773
FBtr0333025;FBtr0075786;FBtr0075785	CG8783	2	1	0.983083	0.955297	0.99155	0.907574	0.739927	0.790415	0.779949	0.0202997	0.102873	0.0276872	0.0536249	0	0.074382
FBtr0301405;FBtr0075842;FBtr0075843	ImpL1	5	0.0861002	0.093264	0	0.109616	0.0885949	0.0678794	0.0591287	0.075556	0.0973203	0.0642547	0.661521	0.920453	0.895669	1
FBtr0075844	CG14110	5	0.0549229	0.0709385	0.0462876	0.0262087	0	0.0238849	0.0527042	0.0230298	0.0718764	0.035272	0.72982	0.784105	0.848802	1
FBtr0300699;FBtr0075873	CG11263	2	0.100339	0.0999286	0.954265	0.875628	0.806423	0.931163	0.943864	0.833257	1	0.0765334	0.0859087	0.0934837	0.0694989	0
FBtr0345366;FBtr0332077;FBtr0075887	CG11279	5	0	0.070154	0.0822576	0.0579022	0.0595075	0.0360913	0.00277595	0.0243437	0.0263435	0.000805587	0.852781	1	0.975642	0.94057
FBtr0075970;FBtr0332643	sti	6	0	0.102276	0.534766	0.806731	0.829334	0.893354	0.98382	1	0.978241	0.942808	0.670056	0.509321	0.673366	0.339931
FBtr0075995	CG11534	2	0.870696	1	0.866325	0.105767	0	0.91351	0.867748	0.861788	0.922188	0.944009	0.738339	0.128794	0.0529307	0.0843304
FBtr0075999	Nrx-IV	5	0.0216283	0.0382883	0.0980739	0	0.052025	0.0336641	0.0683487	0.750251	0.711017	0.80323	0.942266	1	0.943757	0.998671
FBtr0076001;FBtr0333381	CAH2	4	1	0.747872	0.549858	0.625364	0.59677	0.427854	0.613484	0.0480789	0	0.140025	0.0848997	0.0651606	0.034654	0.741674
FBtr0333357;FBtr0076011	Pbgs	3	0.0711695	0.0423613	0.113896	0	0.671784	0.765199	0.842699	0.824444	0.846119	0.806046	0.907084	0.986862	0.963767	1
FBtr0076024	CG5645	2	0	0.0432185	0.0987118	0.0986421	0.0435953	0.051747	0.0609691	0.0428011	0.866391	0.810212	0.875615	1	0.872523	0.991042
FBtr0332710;FBtr0332709;FBtr0076050;FBtr0076049	CG6928	1	1	0.871705	0.712558	0.0401159	0.0406985	0.0705545	0.390049	0.3191	0	0.0206642	0.0250324	0.0265212	0.0289703	0.078095
FBtr0076051	CG6793	3	0.141177	0	0.677143	0.925344	0.93134	0.938898	1	0.914158	0.708811	0.886812	0.94966	0.965192	0.768038	0.887093
FBtr0304650;FBtr0076075	CycA	2	0.0737914	0.7244	0.759281	0.905911	1	0.918297	0.926216	0.948008	0.886169	0.0963653	0.0782073	0.0713267	0	0.0957486
FBtr0076084	CG10361	4	0.0361227	0.0472389	0.0559403	0	0.0924832	0.0289786	0.0421542	0.0362705	0.0629771	0.434546	0.718983	0.842225	0.840924	1
FBtr0344910;FBtr0076093	chrb	5	0.0114969	0.0453946	0.0440758	0.0383834	0.0179132	0	0.0408494	0.0201054	0.00864389	0.988567	0.978427	0.964945	0.963967	1
FBtr0332766;FBtr0076131;FBtr0076130	CG11652	6	0.00226938	0.018238	0	0.727035	0.813981	0.969498	1	0.898671	0.9046	0.811494	0.846981	0.833146	0.940711	0.782454
FBtr0076146	rt	2	0	0.807566	0.799003	0.76173	0.712536	0.774734	0.139591	0.16075	0.168699	0.638956	0.757792	0.889596	0.776276	1
FBtr0331829;FBtr0076161	CG7616	3	0.0605734	0	0.11906	0.0930025	0.857019	0.761497	0.892397	0.872981	0.789166	0.894324	1	0.857339	0.931113	0.924631
FBtr0076203	SuUR	6	0.0326746	0	0.76694	0.847727	0.861111	0.855464	0.898106	0.884904	0.856796	0.895493	0.909022	0.97057	0.914474	1
FBtr0076207	CG7839	6	0.0388007	0	0.621721	0.834667	0.82494	0.821953	0.848959	0.874811	0.858175	0.914153	0.965909	1	0.923437	0.985699
FBtr0076216;FBtr0334096;FBtr0113422;FBtr0344833	CG32082	4	0.118702	0.115177	0	0.0448244	0.0820465	0.116192	0.068615	0.0889233	0.0316046	0.110423	0.15072	0.142604	0.81852	1
FBtr0332707;FBtr0076237;FBtr0076236	JIL-1	6	0.0182446	0	0.579887	0.823668	0.7665	0.790314	0.828511	0.908972	0.927298	0.933449	0.961085	0.959601	0.945585	1
FBtr0076241	CG32069	6	0.023121	0.0328347	0.0431455	0.00931203	0.918562	0.862562	0	0.0291003	0.963911	0.943349	0.998388	0.994885	1	0.93527
FBtr0076252;FBtr0076251;FBtr0076250	Aps	6	0	0.0152605	0.0311563	0.91408	0.916076	0.959966	0.985511	0.999641	1	0.957204	0.921704	0.908467	0.845079	0.827234
FBtr0076254;FBtr0076255	CG8009	6	0.149517	0.0547144	0.10064	0.887918	0.731562	0	0.0293157	0.880974	0.877083	0.802814	0.900916	1	0.847162	0.987183
FBtr0076270	CG7949	6	0.00837835	0.0131535	0	0.929946	0.977754	0.954824	0.919391	0.902951	0.979199	0.855816	0.887557	0.98142	1	0.87739
FBtr0331551;FBtr0076307;FBtr0076305;FBtr0339899	ect	4	0.0353263	0	0.0523042	0.0214011	0.0689081	0.0505568	0.0736559	0.0658525	0.0484952	0.0300667	0.0641167	0.694536	0.755363	1
FBtr0076325;FBtr0076324;FBtr0076320;FBtr0076318;FBtr0076317;FBtr0076321;FBtr0076319;FBtr0331848;FBtr0076322;FBtr0076326;FBtr0076323;FBtr0076327	CG8177	5	0.987592	0.945898	1	0.771172	0.804137	0.725355	0.648901	0.596517	0.45864	0.402115	0.243811	0.200301	0.0657661	0
FBtr0345031;FBtr0076382	LanB2	5	0.398791	0.284956	0	0.249215	0.196656	0.327839	0.440816	0.558611	0.628188	0.713433	0.882619	0.905238	0.958743	1
FBtr0076429	CG4476	1	1	0.800949	0.574458	0.0494962	0.0460982	0.0273983	0.0391035	0	0.0569954	0.00658936	0.012783	0.0489521	0.0261213	0.073516
FBtr0076471	pall	2	0.107016	0.131377	0	0.0832335	0.0814551	0.10771	0.0420514	0.0495541	0.0283166	0.12107	0.910415	0.98784	1	0.862491
FBtr0331584;FBtr0076480;FBtr0076484;FBtr0076483;FBtr0076482;FBtr0076481	CG3967	4	0.00189534	0.0341728	0	0.0121908	0.0599031	0.0160062	0.0461583	0.0718281	0.0423968	0.0229678	0.534465	0.700566	0.8077	1
FBtr0346530;FBtr0076499;FBtr0333886	Klp67A	2	0.748966	0.739202	1	0.967504	0.982585	0.990302	0.990494	0.997276	0.944596	0.699502	0.0291703	0	0.00950303	0.0169736
FBtr0076508;FBtr0076507;FBtr0076506	Tsp66E	4	0.87828	0.871085	0.880285	0.778864	0.870465	0.828571	0.0259409	0.00788193	0	0.0370162	0.68801	0.655979	0.968099	1
FBtr0076510	GNBP3	1	0.824001	1	0.0472386	0.0491679	0.00187321	0.0265403	0.00723208	0.0801915	0.0252406	0	0.0197562	0.0656158	0.0251381	0.0360993
FBtr0076513;FBtr0301139;FBtr0076514;FBtr0301140	CG5021	5	0.115716	0.134879	0.107771	0.088391	0.0983135	0	0.219526	0.0723083	0.994981	0.915593	0.920576	0.997737	1	0.985056
FBtr0333907;FBtr0076519	CG5068	6	0	0.000292532	0.0694862	0.885781	0.912806	0.942839	1	0.962465	0.941075	0.857192	0.880792	0.874549	0.848874	0.789542
FBtr0076541;FBtr0076539;FBtr0344979;FBtr0076540;FBtr0076538;FBtr0331858;FBtr0300462	bol	5	0.0160211	0.0512561	0.0752205	0	0.00665296	0.0636345	0.614455	0.685922	0.8376	0.851906	0.966677	1	0.989148	0.976606
FBtr0290104;FBtr0076551;FBtr0076550;FBtr0076549;FBtr0290103	smg	1	0.638289	0.873307	1	0.341404	0.249081	0.234954	0.186958	0.239191	0.162927	0.0665222	0.0655009	0.0303732	0.090357	0
FBtr0076571	Cp18	1	1	0.09199	0.0189647	0.0752398	0	0.0900221	0.0926708	0.037949	0.0877475	0.0701811	0.0698512	0.107348	0.10285	0.0640154
FBtr0076573	Cp19	1	1	0.742157	0.487132	0.286912	0.0455512	0.0233957	0.0164077	0.0101099	0.0281632	0.0259555	0.0176119	0.00856198	0	0.530703
FBtr0076574	Cp16	4	0.793114	0.464014	0.640615	0.777001	0.0313943	0.0415576	0.0772162	0.0354349	0	0.029995	0.025615	0.654234	0.860869	1
FBtr0305901;FBtr0076583	dally	5	0.0883286	0	0.0848601	0.107846	0.0658972	0.0476971	0.133988	0.117625	0.0102182	0.128391	0.996725	0.905048	0.872836	1
FBtr0076594;FBtr0076593	Prm	4	0.566053	0.327229	0.414867	0.539578	0.360489	0.245393	0.431984	0.0706324	0	0.359124	0.356934	0.523376	0.793391	1
FBtr0076647	Cdc6	2	0.412489	0.707244	0.946869	1	0.978022	0.968228	0.95708	0.846504	0.745986	0.603822	0.199886	0	0.00817858	0.0499024
FBtr0076650	Nelf-E	2	0.0102497	0.0901012	0.0892111	0.864498	0.873934	0.0197783	0.0339589	0	0.894668	0.960275	0.969066	0.947933	0.969438	1
FBtr0076655	CG6683	6	0.0493912	0.106925	0	0.866764	0.951179	0.744686	0.77274	0.879031	0.902738	0.897116	1	0.917126	0.993532	0.884022
FBtr0345602;FBtr0076659	CG6983	3	0	0.085508	0.0928042	0.0597458	0.719818	0.849801	0.891056	0.902299	0.941932	0.944833	0.945337	1	0.968363	0.963003
FBtr0346546;FBtr0076688	CdsA	3	0.0587603	0	0.731392	0.641259	0.782155	0.744705	0.810185	0.756836	0.665893	0.770335	0.847117	0.853956	0.880378	1
FBtr0076695	CG8005	6	0	0.045411	0.0656293	0.841186	0.841954	0.914596	0.89845	0.816825	0.957365	0.848652	0.928799	0.983062	1	0.97076
FBtr0076706	CG13671	2	1	0.989532	0.115991	0	0.0252251	0.0723146	0.0657626	0.0511346	0.926566	0.929436	0.941115	0.960408	0.920487	0.958937
FBtr0076729	RecQ4	2	0.878268	0.794538	1	0.788324	0.786578	0.761963	0.78528	0.755244	0.677011	0.610156	0.532657	0.381909	0.467362	0
FBtr0300413;FBtr0076769;FBtr0332787;FBtr0332789;FBtr0332790;FBtr0332792;FBtr0345912;FBtr0332788;FBtr0300412;FBtr0332791;FBtr0076768	syd	5	0.0169951	0.0583465	0	0.0470761	0.075265	0.057778	0.0616199	0.023515	0.00588972	0.780277	0.883509	0.884187	0.818653	1
FBtr0076772;FBtr0076771;FBtr0112817;FBtr0076774;FBtr0076773;FBtr0306647	pbl	6	0	0.0201196	0.6754	0.880573	0.932691	0.953408	1	0.971571	0.992913	0.980724	0.891691	0.86446	0.904401	0.827058
FBtr0332145;FBtr0076831	CG8539	4	0.99612	0.914857	0.969136	1	0.850368	0.155963	0	0.132709	0.175395	0.17676	0.183443	0.170154	0.177127	0.149579
FBtr0333367;FBtr0076835	Neos	6	0	0.90042	0.755867	0.944409	0.942484	0.932698	0.92315	0.948618	0.931545	0.933423	0.963013	1	0.952641	0.964809
FBtr0302045;FBtr0076846;FBtr0332729	qm	3	0.0989833	0	0.099107	0.921178	0.890926	0.95087	0.961729	0.916789	0.91616	0.931863	1	0.998786	0.994149	0.963154
FBtr0076851;FBtr0333404;FBtr0331849	smid	6	0.0178017	0	0.048559	0.869037	0.939422	0.965802	0.94213	0.96296	0.969731	1	0.910806	0.857389	0.869641	0.948115
FBtr0332800;FBtr0076867	Rac2	3	0	0.762435	0.650973	0.669433	0.759519	0.675648	0.746905	0.808582	0.863198	0.910721	0.988306	0.985006	1	0.977564
FBtr0076878	CTCF	6	0.0122071	0.0844293	0	0.852944	0.765081	0.833543	0.868802	0.876048	0.95002	0.991924	0.936547	0.990712	0.973239	1
FBtr0076880	CG14834	1	1	0.724193	0.499256	0.359733	0.323073	0.276636	0.231726	0.326633	0.347105	0.31762	0.440469	0.550164	0.443776	0
FBtr0100278;FBtr0076882	eco	1	1	0.915237	0.920657	0.0670936	0.033113	0.0445827	0.0293408	0	0.0644506	0.0569485	0.045521	0.0560976	0.0734324	0.0560988
FBtr0076938	sgl	3	0.379405	0.17297	0	0.584345	0.481471	0.524771	0.66553	0.718116	0.788344	0.778186	0.956013	0.932398	0.903822	1
FBtr0345911;FBtr0076944;FBtr0346999;FBtr0346998;FBtr0330059	vvl	5	0.0422156	0.0890809	0.0145296	0.0795591	0.0173362	0.0594315	0.102246	0	0.736327	0.834379	0.885142	0.988534	0.900319	1
FBtr0076946;FBtr0076945	Prat2	5	0.031556	0.0579878	0	0.0204312	0.073155	0.0471892	0.00536354	0.0807991	0.00353047	0.0449687	1	0.761433	0.881647	0.746323
FBtr0332067;FBtr0332066;FBtr0332065;FBtr0077008	ImpL3	5	0.0346475	0	0.0227989	0.0245286	0.0259838	0.0177735	0.0609904	0.560178	0.569566	0.657077	0.888986	0.924572	0.991392	1
FBtr0077014	LanA	5	0.401856	0.075509	0.0668514	0.0960833	0	0.022291	0.213367	0.552377	0.676714	0.720399	0.889057	0.875789	0.96672	1
FBtr0077015	CG13298	6	0	0.105377	0.79339	0.918162	0.869979	0.819732	0.89737	0.881518	0.940204	0.974962	0.997368	1	0.971057	0.935124
FBtr0077016	D19A	5	0.0250951	0.0549124	0.0674413	0.0716224	0	0.0690361	0.0298773	0.033751	0.839312	0.80093	0.922874	0.96221	0.877048	1
FBtr0077017	D19B	6	0	0.0418343	0.0371437	0.763174	0.770223	0.831306	0.747981	0.807519	0.832592	0.885827	0.906575	1	0.91018	0.960096
FBtr0077025	CG5568	2	0.11258	0.0713364	0.115496	0.0986405	0.945699	1	0.973583	0.111093	0.0606401	0.0928484	0	0.0643891	0.192549	0.109783
FBtr0077030	CG32409	6	0.019301	0	0.0293341	0.649892	0.675496	0.759106	0.775249	0.848933	0.895576	0.897432	0.951686	1	0.95014	0.998172
FBtr0330118;FBtr0077032	CG32407	5	0.0202606	0	0.074858	0.0800726	0.0557568	0.0191404	0.0389072	0.0118542	0.581674	0.565382	0.872034	0.937833	0.868005	1
FBtr0077063	CG10467	6	0	0.00946864	0.0140107	0.864328	0.846766	0.867968	0.909265	0.92011	1	0.823227	0.984206	0.953183	0.944978	0.971072
FBtr0077065	CG13295	1	1	0.90032	0.921011	0.886254	0.853	0.774022	0.026674	0.0381688	0.0803387	0.0123003	0	0.0209175	0.0158674	0.0335487
FBtr0077083	Sras	1	1	0.811107	0.872625	0.0869246	0.00103362	0	0.0179741	0.0418395	0.105727	0.00653539	0.875563	0.789112	0.0489396	0.0543535
FBtr0077090	lin-28	5	0.034822	0.0308016	0.0179811	0.0159015	0.0388594	0	0.0271951	0.417684	0.640327	0.725624	0.85021	1	0.864473	0.953835
FBtr0310534;FBtr0310533;FBtr0077112	CG5537	6	0.0430995	0.0483597	0	0.932839	0.906441	0.90417	0.924876	0.962572	0.941419	0.944677	0.957947	0.940791	1	0.915737
FBtr0077118	Myt1	1	1	0.833161	0.781531	0.837387	0.0306745	0.0182223	0.0623207	0.0271234	0.048207	0	0.0340298	0.0825264	0.0515861	0.0189577
FBtr0077125	Sse	2	0.932056	1	0.840564	0.0887906	0.119687	0.018237	0.882389	0.875242	0.825255	0.876116	0.0907732	0	0.0475625	0.0290735
FBtr0077128	CG10591	5	0.0124331	0.00537375	0.0392988	0.031457	0.021423	0.00603985	0.0268939	0	0.0219992	0.409319	0.856518	1	0.969671	0.981148
FBtr0346640;FBtr0077130	spo	2	0.00751951	0.0331158	0.127556	0.85855	0.873232	1	0.93043	0.857831	0.722182	0.66614	0.0484054	0.0128092	0	0.0483795
FBtr0077136	sinu	3	0.0117019	0.0232286	0.0349135	0.0464124	0	0.0395794	0.76468	0.852392	0.811109	0.834983	0.969982	0.998542	0.941481	1
FBtr0077154	CG10635	6	0.0296896	0.0373527	0	0.863256	0.882183	0.834911	0.909604	0.84336	1	0.991214	0.82443	0.854141	0.811336	0.803364
FBtr0077192	fliI	6	0.0214472	0	0.0424803	0.798908	0.787828	0.766127	0.816645	1	0.847685	0.924471	0.840933	0.904696	0.943363	0.824553
FBtr0077198	Sep1	6	0	0.0998543	0.308047	0.766327	0.872025	0.923053	0.969763	0.979125	1	0.959025	0.986172	0.894556	0.982096	0.824447
FBtr0077223	pen	6	0.327433	0	0.554334	0.681821	0.72748	0.731884	0.769457	0.805759	0.841571	0.880696	0.935987	0.995552	0.917252	1
FBtr0331813;FBtr0331815;FBtr0310652;FBtr0077235;FBtr0077234	CG32521	4	1	0.824164	0.781845	0.0429615	0.0442886	0.511186	0.582986	0.00179862	0.075269	0.0648529	0.0351748	0.0549801	0.0697845	0
FBtr0077319	Tak1	2	0	0.125382	0.768577	0.857743	0.723945	0.871721	1	0.800215	0.929293	0.0889217	0.107288	0.0620095	0.0625101	0.127545
FBtr0301537;FBtr0345015;FBtr0304906;FBtr0077320;FBtr0340405	RhoGAP19D	6	0.00404196	0	0.899674	0.918416	0.837285	0.882252	0.995965	0.965067	0.905531	1	0.946027	0.883398	0.910347	0.908216
FBtr0340362;FBtr0077326	Obp19c	1	1	0.76523	0.597571	0.4494	0.279842	0.0288386	0.0149918	0.0334028	0	0.00415479	0.0287065	0.00354595	0.0214063	0.0720798
FBtr0306737;FBtr0077334	obst-A	4	0	0.0354373	0.122625	0.0760516	0.0621804	0.0535466	0.0650812	0.0549473	0.0373282	0.0443649	0.0527646	1	0.911582	0.97621
FBtr0077341	CG17068	2	0.179441	0.127907	0.163268	0.956416	1	0.848922	0.997328	0.773747	0.829845	0	0.0984952	0.206244	0.143105	0.125096
FBtr0336962;FBtr0077384	CG15628	2	0.0232089	0.0537271	0.0749956	1	0.931367	0.940244	0.981669	0.984956	0.0369743	0	0.0709153	0.0773339	0.0797787	0.0835446
FBtr0077397;FBtr0336834;FBtr0077400;FBtr0077399;FBtr0077398;FBtr0077395;FBtr0345631;FBtr0077396;FBtr0336833	hoe1	1	0.961787	1	0.801006	0.520849	0.594369	0.340578	0.168391	0.283063	0.317255	0.154973	0.0614127	0.0696294	0	0.258013
FBtr0077423	Bsg25A	1	0.0921644	0.0266333	0.880396	1	0.780612	0.0537969	0.063069	0.0392099	0.00440187	0	0.0626012	0.0761488	0.181681	0.0752955
FBtr0334401;FBtr0077429	Traf4	2	0.117739	0.106221	0	0.154019	1	0.998634	0.976121	0.186977	0.0843246	0.0212585	0.146738	0.0678194	0.163485	0.0690747
FBtr0077431	Tps1	5	0	0.198754	0.135157	0.139259	0.172199	0.107037	0.141409	0.171389	0.143128	1	0.928222	0.941681	0.945817	0.98205
FBtr0077435	Dim1	6	0.0778808	0.0639504	0	0.0608631	0.000362681	0.839484	0.9272	0.745264	0.962956	0.903583	1	0.949388	0.904116	0.932633
FBtr0077453	Gs1l	3	0.00568172	0	0.076306	1	0.824902	0.934132	0.938932	0.997157	0.965606	0.958165	0.928201	0.944503	0.958747	0.761214
FBtr0077454	CG15440	6	0.0478105	0.133142	0	0.730053	0.716618	0.795879	0.897887	0.822901	0.911696	0.831236	0.869976	0.956016	1	0.93854
FBtr0077455	CG15439	6	0.0756743	0	0.857894	0.949962	1	0.882783	0.841984	0.960749	0.902227	0.882729	0.916189	0.930973	0.900067	0.929984
FBtr0077478	ft	3	0.0791741	0	0.0725914	0.0955864	0.0602189	0.704237	0.730965	0.934951	0.925375	1	0.974057	0.844278	0.92251	0.726987
FBtr0077496;FBtr0307052;FBtr0307051	CG3921	4	0.0125102	0.0359516	0.0477715	0	0.0343784	0.0420574	0.0393591	0.0662197	0.0454197	0.0145053	0.730507	0.81774	0.767832	1
FBtr0077537;FBtr0077538	CG2818	6	0.10191	0.142187	0.77751	0.930239	0.958554	0.78574	0.820635	0.827659	1	0.867834	0.839082	0.727463	0	0.195111
FBtr0343239;FBtr0077569	CG3238	2	0.0343966	0.0723952	0.943237	0.98178	1	0.898546	0.912621	0.823074	0.821825	0.800135	0	0.0580241	0.0958432	0.0465517
FBtr0077572	CG3246	4	0.986007	1	0.845387	0.716347	0.0650797	0.0629481	0.0637904	0.0645981	0	0.778918	0.841957	0.810608	0.789536	0.826435
FBtr0077573	Cog3	6	0	0.00123669	0.0937354	0.798482	1	0.807163	0.785838	0.816975	0.858566	0.927907	0.731317	0.859521	0.895479	0.881992
FBtr0303992;FBtr0077592	pgant2	4	0.0697	0.172756	0	0.15621	0.0702431	0.151159	0.110614	0.0796635	0.0684437	0.091162	0.818918	0.910723	0.915835	1
FBtr0077627;FBtr0077626;FBtr0077625	CG2991	4	0.77174	0.89075	1	0.861989	0.757279	0.0875308	0.0785576	0.674825	0.116432	0.0615197	0.0832361	0	0.0020126	0.145956
FBtr0077629	CG8814	5	0.839057	0.752324	0.882173	1	0.894582	0.943495	0	0.00985141	0.6709	0.732527	0.622658	0.84305	0.737758	0.847343
FBtr0077631	betaggt-II	3	0.0481339	0	0.849176	0.996171	0.894448	0.982175	0.9567	0.898725	1	0.847392	0.879426	0.963793	0.877054	0.94473
FBtr0077641	gammaTub23C	6	0	0.854859	0.81747	0.965573	0.991182	0.992242	0.993974	0.9958	0.972114	1	0.919886	0.889331	0.979309	0.852787
FBtr0077643	Bem46	2	0.0362182	0.111849	0.0208789	0.0336628	0.0403283	0	0.00868479	0.835696	0.852279	0.991585	0.952374	1	0.899563	0.916508
FBtr0077650	CG17219	6	0	0.0434912	0.0360415	0.881977	0.971345	0.914909	0.919538	0.904964	0.953485	0.943516	0.911123	1	0.925045	0.888091
FBtr0344088;FBtr0335478;FBtr0077653	CG17260	2	0.102308	0	1	0.898065	0.843983	0.910084	0.876513	0.920187	0.922326	0.854281	0.138473	0.0478447	0.143083	0.06759
FBtr0077659;FBtr0335387	CG3523	5	0.835736	0.773293	0.722768	0.999845	1	0.953601	0.932194	0.649651	0.360613	0.466433	0.0604424	0	0.173193	0.256734
FBtr0077662	toc	1	0.991384	0.944874	1	0.0463665	0.0193097	0.0654295	0.0321866	0	0.0853104	0.084524	0.0638585	0.165456	0.0802187	0.0640733
FBtr0077666	cnir	2	0.0452596	0.0743308	0	0.130382	0.0645395	0.0392427	0.691944	0.880491	0.848473	0.82514	0.864498	0.845496	1	0.931991
FBtr0077670	alpha4GT1	1	1	0.824524	0.711863	0.896405	0.851403	0.753198	0.699426	0.0512437	0.0230229	0	0.0392905	0.00899977	0.00272894	0.0625223
FBtr0331654;FBtr0077674;FBtr0305980	Chd1	6	0.0301211	0	0.876015	0.866599	0.761302	0.836577	0.813632	0.799964	0.902778	0.833437	0.986076	0.890782	0.97411	1
FBtr0077712	Cwc25	6	0.0386209	0	0.0531679	0.908904	0.874725	0.938223	0.936227	1	0.954922	0.917816	0.973691	0.947291	0.974295	0.969761
FBtr0335126;FBtr0077715	Trn-SR	6	0	0.0437808	0.973104	0.902506	0.933347	0.937456	0.954186	0.944824	0.982322	0.938285	0.940703	0.985838	1	0.965666
FBtr0077717	Taf10	2	0.0200178	0.0229304	0.0013338	0.0187437	0.0282963	0.00863568	0	0.0605383	0.0355009	0.0107037	0.0623685	1	0.92729	0.931295
FBtr0344854;FBtr0077746	insv	2	0	0.026078	0.622253	0.953625	1	0.981958	0.918112	0.85364	0.669202	0.589409	0.00917009	0.0412268	0.0145254	0.0291641
FBtr0077748	Cyp309a2	5	0.00728725	0.0453103	0.036523	0.0195956	0.0259274	0.0283372	0.0276962	0	0.511064	0.546284	0.976166	1	0.960943	0.916591
FBtr0335159;FBtr0077751	CG4267	1	1	0.786352	0.589687	0.0768858	0.0838496	0.0603663	0.127815	0.0806578	0.0399368	0.0788729	0.0858641	0	0.0500407	0.07019
FBtr0077835	mio	6	0.104145	0	0.0521139	0.91163	0.878244	0.925155	0.959542	0.941714	0.948006	1	0.975606	0.994975	0.984666	0.951443
FBtr0330660;FBtr0330659;FBtr0330658;FBtr0077851;FBtr0077850	aop	2	0.0820344	0	0.106109	0.150917	0.145775	0.844182	1	0.955986	0.922748	0.105881	0.0661638	0.154481	0.11962	0.0944946
FBtr0334813;FBtr0077852	CG11723	2	0.104466	0.0744044	0.1249	0.0784668	0.235801	0	0.0799859	0.121971	0.766703	0.849878	0.856472	1	0.855036	0.903062
FBtr0077903	CG17712	2	0.147157	0.697114	0.922316	0.0120032	0	0.0227135	0.0421302	0.037605	1	0.987157	0.904137	0.913657	0.769167	0.904012
FBtr0077941;FBtr0329985	lea	6	0.0557743	0.00810994	0	0.784909	0.812855	0.936945	1	0.997403	0.993708	0.971775	0.911013	0.812665	0.828438	0.812319
FBtr0331289;FBtr0077982;FBtr0077981	CG5080	5	0.37299	0.459569	0.0864873	0.0801466	0.0679694	0.0155124	0	0.0705955	0.0621023	0.454637	0.893764	0.97695	1	0.978054
FBtr0077994;FBtr0077993	S	2	1	0.854831	0.639006	0.689079	0.62025	0.665443	0.786976	0.766643	0.710638	0.60131	0.031358	0.0207585	0	0.0360192
FBtr0078011	Clp	6	0.0391063	0	0.867356	0.947454	0.867774	0.901525	0.914477	0.946119	0.967299	0.857628	0.995072	1	0.975314	0.996416
FBtr0345738;FBtr0078025	Lsp1beta	1	1	0.932754	0.887188	0.113635	0.0858451	0.0948629	0.0798557	0.117718	0.0867581	0	0.0982876	0.00682288	0.0351588	0.127018
FBtr0078033;FBtr0078032;FBtr0078031	aru	5	0.0941987	0.0728342	0.11928	0.0924787	0	0.120692	0.680353	0.686786	0.655684	0.746806	0.819503	0.894192	0.922276	1
FBtr0343249;FBtr0078045	ds	3	0.0544086	0	0.0489106	0.0245756	0.0272618	0.0134714	0.0245785	0.968327	1	0.977608	0.944382	0.898021	0.9073	0.73343
FBtr0331230;FBtr0078061;FBtr0331231	CG4133	5	0.0589247	0.0597913	0.0491055	0.0225562	0	0.0824812	0.0791937	0.0768942	0.0132589	0.119184	0.916437	0.913013	0.868633	1
FBtr0078089	CG11885	6	0.0348212	0.071777	0	0.985057	0.922477	0.986406	0.994618	0.960974	1	0.984523	0.977381	0.879248	0.983039	0.746898
FBtr0306539;FBtr0306538;FBtr0306537;FBtr0306536;FBtr0078100	dbr	6	0.0928117	0	1	0.909689	0.856025	0.843849	0.878195	0.9138	0.881821	0.930436	0.935691	0.983608	0.925194	0.972361
FBtr0078116	CG11454	2	0.579215	0.666786	0.702458	0.0355528	0.0529129	0.0974324	0.0391579	0	0.0193483	0.929931	0.86883	0.832671	1	0.812067
FBtr0343777;FBtr0078128	CG11555	6	0.0601441	0.0900562	0	0.962795	0.819464	0.850518	0.812274	0.888067	0.873561	0.800447	0.961453	0.952364	0.900075	1
FBtr0078136	CG3625	5	0	0.0355979	0.0462622	0.0108918	0.0416756	0.0057473	0.0281652	0.0057746	0.660491	0.75772	0.9162	1	0.802492	0.98488
FBtr0078139	mbm	6	0.0733402	0.0084321	0	0.71478	0.784027	0.678702	0.735768	0.77832	0.797827	0.825503	0.962565	0.988509	0.877116	1
FBtr0336990;FBtr0078143	Rpp30	2	0.043849	0.951709	0.0240375	0.0612577	0.0254118	0	0.0393876	0.0819354	0.89736	0.807307	0.930033	0.944312	1	0.967929
FBtr0100379;FBtr0078154;FBtr0078155;FBtr0078153	CG3164	4	1	0.698806	0.395923	0.15782	0.0804942	0	0.063189	0.232379	0.30464	0.55587	0.715534	0.75377	0.583726	0.740521
FBtr0078210	CG4858	3	0.0634862	0.132737	0	0.79597	0.858592	0.951413	0.869369	0.928208	1	0.862109	0.893423	0.814381	0.940354	0.852282
FBtr0331567;FBtr0078219;FBtr0078217;FBtr0078218;FBtr0078216	CG5059	3	0.00887445	0.00297823	0	0.904499	0.945736	0.984151	0.994072	1	0.921971	0.95558	0.955972	0.917683	0.92031	0.883253
FBtr0078255;FBtr0321284	Spc105R	2	0.0631914	0	0.170112	0.980578	0.69073	0.868744	1	0.992902	0.931881	0.790707	0.124439	0.106907	0.107415	0.135204
FBtr0078276	CG11396	2	0.131805	0	0.17682	0.996563	0.929552	0.972213	0.898272	1	0.0915814	0.154816	0.106884	0.097447	0.171692	0.0628636
FBtr0078277	CG11399	2	0.191625	0.213247	0.101045	0.116323	0	0.161605	0.172568	0.921687	0.68461	0.818487	0.920186	0.945501	1	0.965485
FBtr0304820;FBtr0078288	Sin	2	0.108589	0.0875167	0	0.0864342	0.03799	0.137142	0.0187628	0.112851	0.815701	0.749836	0.929515	1	0.790831	0.806026
FBtr0078289;FBtr0111038;FBtr0301602;FBtr0078290	siz	6	0	0.120211	0.0855643	0.79513	0.829768	0.827368	1	0.908746	0.860163	0.819492	0.845519	0.756331	0.785614	0.829026
FBtr0078297;FBtr0078300;FBtr0078299;FBtr0078298	CG10512	5	0.0288799	0	0.0102194	0.044217	0.0221687	0.0427481	0.0164426	0.0522959	0.595013	0.843082	1	0.935542	0.903832	0.81996
FBtr0078309	CG12975	6	0.0989001	0	0.0799703	0.764243	0.825457	0.82672	0.788008	0.672591	0.849285	0.877615	0.834946	1	0.904542	0.846866
FBtr0078317;FBtr0078316	CG33054	3	0.140062	0	0.124835	1	0.869941	0.791968	0.95664	0.967847	0.854274	0.816367	0.96621	0.903121	0.0802287	0.0123536
FBtr0301198;FBtr0301197;FBtr0078366;FBtr0078365;FBtr0078364;FBtr0078363;FBtr0078362;FBtr0078361;FBtr0078359	CG7611	6	0.256981	0	0.346583	0.649558	0.647371	0.714932	0.765737	0.82594	0.928381	0.85042	0.981886	0.983546	0.974802	1
FBtr0078380	CG7173	4	0.0353812	0.134774	0.0392315	0	0.066034	0.0895166	0.0551334	0.0559798	0.0199129	0.0337901	0.074393	0.695654	0.841918	1
FBtr0078391;FBtr0303654;FBtr0303653;FBtr0078392;FBtr0078390;FBtr0078389	Hr78	5	0.0939485	0.0456273	0	0.0390029	0.0664724	0.0370386	0.0698358	0.0609536	0.69533	0.781442	0.869535	0.973883	0.94581	1
FBtr0078396;FBtr0331821	CG5656	2	0	0.0498728	0.0103794	0.00508275	0.0360409	0.00307099	0.00197588	0.0346267	0.0087855	0.0240433	0.887863	0.948148	0.896428	1
FBtr0078405	Pc	2	0.0228113	0.00700812	0	0.0633579	0.0455438	0.0523865	0.0761133	0.990382	0.939057	0.952634	0.997708	0.937824	0.899555	1
FBtr0078412	ppl	3	0.024686	0.0288975	0	0.719565	0.597433	0.542636	0.711174	0.777042	0.862095	0.825962	0.936009	0.809085	0.898201	1
FBtr0309869;FBtr0078477	CG7470	5	0.0372645	0	0.0617557	0.0198598	0.0294765	0.0487072	0.0420319	0.410159	0.616816	0.770544	0.8984	0.908026	0.92232	1
FBtr0078509;FBtr0306107;FBtr0330159	Ten-m	3	0	0.0486048	0.617472	0.590161	0.670026	0.700393	0.593124	0.689441	0.779181	0.882386	0.931122	0.919997	0.901388	1
FBtr0078557;FBtr0078556;FBtr0078555	slif	4	1	0.708409	0.415919	0.046079	0.0645198	0.0358072	0.0483511	0.0270858	0	0.0645788	0.0313143	0.0297824	0.0670939	0.00163548
FBtr0078561;FBtr0078563	Mes2	6	0.0357713	0.0593189	0	0.64906	0.831785	0.811692	0.850866	0.98813	0.934568	0.998305	0.981489	1	0.898431	0.950852
FBtr0346344;FBtr0078596	Osi6	5	0.602841	0.480968	0.462886	0.0345681	0	0.461159	0.497091	0.426912	0.348835	0.148823	0.511705	0.820623	0.781857	1
FBtr0078597	Osi7	5	0.037714	0.0430714	0.0948143	0.0325723	0.0558869	0.00872009	0.0370714	0.0547092	0	0.0572356	0.740951	0.972559	0.914692	1
FBtr0078607	Osi15	4	0.102052	0.0707304	0	0.0980484	0.0895762	0.0816179	0.103331	0.0762276	0.0960735	0.0745505	0.107844	0.523432	0.685542	1
FBtr0078617	Obp83g	4	0.0429701	0.056559	0.0823091	0.0621089	0.0205904	0.0436058	0.0523927	0	0.0885028	0.0636348	0.0613102	0.0199071	8.55606e-05	1
FBtr0344265;FBtr0078686;FBtr0078687	Itp-r83A	4	0.805628	0.871563	1	0.190298	0	0.214439	0.169415	0.215972	0.207476	0.20447	0.237529	0.205847	0.171355	0.219619
FBtr0078722	Madm	6	0.201383	0	0.14542	0.885591	0.837387	0.924237	0.896347	0.890396	0.937728	0.927627	0.997004	0.97603	0.988242	1
FBtr0334951;FBtr0078728;FBtr0334952	Xe7	3	0.0181511	0	0.0471799	0.0403221	0.0635758	0.892321	0.939487	0.854379	0.853321	0.824852	0.900207	1	0.877065	0.995036
FBtr0078733;FBtr0330315	MTA1-like	6	0.0971628	0.0792263	0	0.752472	0.839541	0.899938	0.878853	0.817685	1	0.932519	0.967355	0.896222	0.982603	0.965043
FBtr0078743	asl	2	0.13221	0	0.729234	0.913523	0.848706	0.855427	0.932982	1	0.991651	0.861693	0.132827	0.14509	0.106273	0.117668
FBtr0078752	CG2926	6	0.0492667	0	0.859242	0.862254	1	0.835533	0.875449	0.923348	0.794717	0.801823	0.962341	0.949244	0.899015	0.948868
FBtr0344274;FBtr0344273;FBtr0344272;FBtr0078766	ksr	6	0.0298534	0.0132903	0	0.109272	0.720137	0.71855	0.670065	1	0.836141	0.759444	0.797916	0.751501	0.504634	0.755166
FBtr0078767	Hdac3	6	0.0396499	0.0733653	0	0.117832	0.150098	0.920885	1	0.980031	0.956337	0.918839	0.917152	0.963537	0.890642	0.953203
FBtr0344832;FBtr0078795	CG2663	4	0.043424	0.0250514	0.00340137	0.0220362	0.061171	0	0.0383717	0.00804394	0.0384422	0.0635124	0.0641925	0.0445001	0.00688728	1
FBtr0078802	hd	2	0.864973	0.926796	1	0.81085	0.801643	0.774765	0.748878	0.697381	0.625382	0.645314	0.62768	0.0950943	0	0.040299
FBtr0078823	CG12163	1	1	0.77778	0.712599	0	0.0345375	0.0872911	0.0936718	0.074804	0.0886591	0.0901682	0.0585236	0.0800197	0.0442805	0.550867
FBtr0078836	opa	1	0.133764	0.0602871	0.205094	0.988091	1	0.134223	0.0855215	0.0935848	0.132235	0.113017	0.089478	0	0.129519	0.20949
FBtr0078842	CG12007	6	0.00339374	0	0.065828	0.982562	0.980015	0.92403	0.914652	1	0.956794	0.962265	0.896908	0.943106	0.955821	0.931877
FBtr0345175;FBtr0345174;FBtr0078871;FBtr0078870	CG1129	6	0.0142475	0.0331448	0	0.952313	0.835829	0.893214	0.943406	0.937697	0.957709	0.937428	0.985197	1	0.966303	0.988734
FBtr0078962;FBtr0078961	CG12581	3	0.000435614	0	0.00472091	0.746882	0.655571	0.835039	0.921521	0.939563	0.885036	0.872694	0.867173	0.941536	0.922949	1
FBtr0078975	TwdlF	4	0.606405	0	0.0298062	0.0997653	0.0773447	0.0787089	0.0393798	0.0572861	0.0828173	0.318182	0.456655	0.418279	0.702795	1
FBtr0078992	Marcal1	1	0.985488	1	0.9124	0.00760109	0.0377557	0.00832385	0.0209337	0.057928	0.0167782	0.0559277	0.0301013	0.056141	0	0.117972
FBtr0079003;FBtr0079002;FBtr0079001	Cg25C	4	0.590451	0.110949	0	0.662187	0.568328	0.0273208	0.0540469	0.0552505	0.0536863	0.438833	0.552868	0.603458	0.772069	1
FBtr0329981;FBtr0079018	CG5828	6	0	0.0673751	0.091358	0.997333	0.925276	0.922215	0.969853	0.962568	0.933531	0.967233	0.962114	0.944261	1	0.969299
FBtr0079026	pgant5	5	0.0221721	0.0226758	0.0038072	0.0666086	0.00298035	0	0.0598153	0.0270036	0.691822	0.775954	0.806337	0.870545	0.784637	1
FBtr0079029	CG14036	2	0	0.0743525	0.185845	0.876353	1	0.928864	0.994523	0.947092	0.90992	0.128937	0.109853	0.010991	0.137486	0.152867
FBtr0333539;FBtr0301907;FBtr0301906;FBtr0301905;FBtr0079035;FBtr0079034;FBtr0079033	CG31650	6	0	0.0408252	0.0323309	0.765792	0.876817	0.887603	0.859419	0.902448	0.914987	0.914408	1	0.902154	0.999187	0.912517
FBtr0333541;FBtr0333540;FBtr0079036	vkg	4	0.614189	0.413865	0.254057	0.646861	0.017155	0.0238859	0.0218364	0	0.0326651	0.17268	0.462154	0.585483	0.740156	1
FBtr0079044;FBtr0079041	Rtnl1	3	0.00796067	0.0355631	0	0.718164	0.744822	0.753907	0.795209	0.85666	1	0.789492	0.849785	0.90478	0.888114	0.727535
FBtr0079042	Rtnl1	2	0.0559214	0	0.0859134	0.0368471	0.0180556	0.020475	0.0280074	0.0366357	0.559793	0.530488	0.856947	0.932847	0.835777	1
FBtr0331229;FBtr0079050;FBtr0079051	l(2)05714	6	0	0.077124	0.0668601	0.835342	1	0.772279	0.538888	0.66964	0.890985	0.956519	0.934676	0.96948	0.893431	0.965699
FBtr0346455;FBtr0342934;FBtr0079069	Bub1	2	0	0.0419634	1	0.833226	0.838841	0.86778	0.781073	0.758641	0.0489462	0.00760349	0.000372517	0.0887473	0.0260784	0.0384905
FBtr0079099	CG31915	5	0.0438137	0.0651592	0.0660254	0.0391334	0.0614127	0	0.0403077	0.0361805	0.037519	0.565405	0.809888	0.832381	0.83917	1
FBtr0307062;FBtr0307064;FBtr0307061;FBtr0331675;FBtr0307063;FBtr0307060;FBtr0079102;FBtr0079101	Oscillin	5	0.0862367	0	0.0662783	0.117639	0.0837185	0.0831442	0.103875	0.0994505	0.170354	0.794491	0.987278	1	0.913684	0.92971
FBtr0332554;FBtr0079135	CG11030	6	0.0351278	0.0664479	0	0.0775156	0.687158	0.708499	0.784114	0.723326	0.869649	0.841778	1	0.98469	0.905212	0.986634
FBtr0079139	CG7239	2	0.0682784	0.0878482	0.0140839	0	0.0313963	0.0635703	0.164456	0.0769797	0.820188	0.819338	0.811881	0.90442	0.864094	1
FBtr0079226;FBtr0079225	CG9107	6	0.0908368	0	0.0776105	0.80252	0.788106	0.84349	0.825672	0.849043	0.824247	0.844318	0.949886	0.954575	0.897004	1
FBtr0345336;FBtr0307071;FBtr0307070;FBtr0307069;FBtr0079232;FBtr0079231	lid	6	0	0.0193068	0.74527	0.844395	0.88711	0.840253	0.922678	0.872181	0.960393	0.881457	0.945156	0.952506	1	0.991583
FBtr0309288;FBtr0303267;FBtr0079237	CG13992	1	1	0.110953	0	0.0729664	0.0748166	0.025321	0.0688026	0.0907613	0.0492671	0.0681827	0.0955516	0.0182651	0.072617	0.0675317
FBtr0344764;FBtr0079260	DLP	2	0.0102001	0.0291142	1	0.741226	0.663808	0.639528	0.70248	0.539734	0	0.0133626	0.0521869	0.0617809	0.0263387	0.0410413
FBtr0079262;FBtr0113411	CG31638	2	0.0330265	0.019143	0.0204916	0.0208602	0	0.00485509	0.0133137	0.934099	0.994764	0.954747	0.957287	0.93543	1	0.963396
FBtr0343152;FBtr0079275	Tig	4	0.332954	0.136328	0.157945	0.0563706	0.0513274	0	0.0666239	0.121924	0.0602912	0.130244	0.5385	0.736241	0.732209	1
FBtr0343155;FBtr0079287	CG31637	1	1	0.901738	0.920093	0	0.0844823	0.0496755	0.0288726	0.0565738	0.0544274	0.0241805	0.971402	0.747646	0.0819461	0.0420341
FBtr0079293;FBtr0079292;FBtr0079291	CG11050	6	0	0.0241255	0.745248	0.829298	0.887953	0.884449	0.930136	1	0.951584	0.975756	0.977357	0.970946	0.927847	0.949946
FBtr0079297	CG11070	3	0.0907434	0.104411	0	0.890912	0.876545	0.909152	0.956706	1	0.908484	0.835991	0.801917	0.848566	0.912287	0.874148
FBtr0079301;FBtr0079300;FBtr0329942;FBtr0329943;FBtr0329941	Liprin-alpha	6	0.05727	0.0361329	0	0.975241	0.959588	0.943104	0.952807	1	0.958129	0.964164	0.976435	0.942228	0.985478	0.971139
FBtr0079314;FBtr0079313;FBtr0079311;FBtr0114488;FBtr0079312	Tsp	5	0.0428163	0.0258792	0.0205813	0.0006813	0.0262241	0.0285851	0.0675098	0.0692073	0	0.889491	0.937089	0.977665	0.938811	1
FBtr0079358;FBtr0079361;FBtr0079360;FBtr0079357;FBtr0079359	sip2	6	0.0367195	0.036033	0.098459	0.833169	0.868087	0.94295	1	0.995422	0.954056	0.933615	0.0508286	0	0.45174	0.441529
FBtr0100381;FBtr0079383;FBtr0079382	nrv2	3	0.0591622	0.0201072	0	0.414652	0.493966	0.482317	0.608421	0.737513	0.855734	0.886171	0.934727	0.947446	0.887559	1
FBtr0332370;FBtr0079384	nrv1	4	1	0.771288	0.0725002	0.128279	0	0.0874363	0.000582389	0.062136	0.153008	0.254842	0.493168	0.616472	0.491323	0.6683
FBtr0079424	Nuf2	2	0.0491881	0.894828	1	0.000311808	0.231228	0.110159	0.90106	0.872719	0.807339	0.857587	0.808025	0.0918671	0.0259668	0
FBtr0345288;FBtr0334838;FBtr0079440;FBtr0079439;FBtr0302587	CG5171	5	0.0946227	0.0483798	0	0.0885623	0.0970425	0.112428	0.104323	0.959831	0.768005	0.898716	0.965141	1	0.968931	0.969254
FBtr0332522;FBtr0079441	CG5177	4	1	0.0355121	0.0422998	0.653823	0.752297	0	0.00219264	0.0185591	0.0216404	0.720255	0.729876	0.771565	0.837476	0.945405
FBtr0332523;FBtr0079443;FBtr0308610	chm	2	0	0.213532	0.166816	0.168433	0.14299	0.825458	0.77628	0.210783	0.0498126	0.921622	0.803309	0.957547	0.96217	1
FBtr0344858;FBtr0332531;FBtr0332530;FBtr0301152;FBtr0079448;FBtr0079447;FBtr0079446	CG5973	4	0.0888516	0.068676	0	0.146759	0.101831	0.0757974	0.0285437	0.105412	0.0738523	0.0508174	0.810038	0.922057	0.773324	1
FBtr0079466	CG5958	5	0.613241	0.397746	0.479524	0.0264966	0.0217031	0	0.0411877	0.67728	0.550052	0.720942	0.874073	0.931055	0.925915	1
FBtr0079488	CG7154	6	0	0.512385	0.931001	0.909663	0.911066	0.972314	0.879135	0.989464	1	0.992905	0.999286	0.952876	0.970712	0.985385
FBtr0343415;FBtr0301329;FBtr0079489	r2d2	6	0	0.0211808	0.00353567	0.954426	0.903076	0.931209	0.998736	1	0.901757	0.946135	0.872943	0.849543	0.908343	0.839161
FBtr0079491;FBtr0079490	LanB1	5	0.451091	0.0991606	0	0.0802315	0.0813618	0.174577	0.363595	0.474838	0.587874	0.663478	0.870855	0.884989	0.900222	1
FBtr0343403;FBtr0079493	Herp	5	0.0785016	0	0.105235	0.0611779	0.100637	0.0468733	0.123269	0.0763762	0.873365	0.891801	0.915261	1	0.899449	0.910867
FBtr0331236;FBtr0079524;FBtr0079523;FBtr0331234;FBtr0331235	CG7115	1	0.937392	1	0.971349	0.871035	0.910932	0.0335976	0.046779	0	0.0341288	0.0295611	0.00302853	0.0720534	0.0384091	0.0319407
FBtr0079543	Mcr	2	0.452122	0.327087	0.154459	0.0720246	0.00116686	0	0.376009	0.599297	0.693141	0.803278	0.938519	0.942082	0.886423	1
FBtr0344063;FBtr0305574;FBtr0079551	CG7227	4	0.00370604	0.0927346	0.0294441	0	0.0465599	0.0336788	0.046519	0.0271416	0.0231989	0.00538015	0.698901	0.893367	0.891413	1
FBtr0339671;FBtr0079576	CG8668	1	1	0.899441	0.816933	0.0791541	0.0625662	0.0668075	0.0503449	0.0803478	0.0898423	0	0.0603256	0.0725958	0.116233	0.121289
FBtr0079601	CG7787	6	0.0253989	0	0.038854	0.74817	1	0.732293	0.885158	0.919062	0.908658	0.781639	0.849905	0.82595	0.844598	0.770847
FBtr0301338;FBtr0301339;FBtr0332417;FBtr0303108;FBtr0079629;FBtr0303109;FBtr0079628;FBtr0079626;FBtr0332416;FBtr0302148;FBtr0332418;FBtr0079625;FBtr0302147	Pvr	5	0	0.0323975	0.0034929	0.0133271	0.0365044	0.0255317	0.0306386	0.645257	0.694808	0.766348	0.94175	0.944385	0.907058	1
FBtr0079633;FBtr0079634	CG8372	2	0	0.0864372	0.153715	1	0.993752	0.125755	0.157464	0.166116	0.111323	0.0583002	0.12674	0.10491	0.0722835	0.226476
FBtr0346463;FBtr0079640	CG8498	3	0.0146665	0.0869738	0	0.853129	0.928288	0.902112	0.898653	0.900526	0.932573	1	0.882855	0.981141	0.937797	0.858807
FBtr0079646	CSN8	6	0.0289241	0.0135819	0	0.835857	0.857639	0.880531	0.91044	0.877449	0.92164	0.874815	0.87615	1	0.909891	0.927715
FBtr0303471;FBtr0303470;FBtr0079653;FBtr0303468;FBtr0303467;FBtr0079658;FBtr0079656;FBtr0079654;FBtr0303469;FBtr0079657;FBtr0079655	CG13384	6	0.0451622	0.0251649	0.0175219	0.0579498	0	0.766522	0.797544	0.959432	0.921196	1	0.980024	0.951517	0.995721	0.93351
FBtr0332008;FBtr0079674	fu2	2	0.0726618	0.150619	0.0834691	0.0804734	0.861194	0.946261	0.939779	0.969623	1	0.0707945	0.0707568	0.108383	0.05204	0
FBtr0333414;FBtr0333413;FBtr0079683	CG13090	6	0.0478635	0	0.0536265	0.956363	0.922765	0.986606	1	0.892115	0.976184	0.903573	0.870907	0.823993	0.848445	0.824103
FBtr0329932;FBtr0329931;FBtr0303879;FBtr0079691;FBtr0303878;FBtr0303877;FBtr0329930	Sema-1a	3	0.636345	0.733135	0.658245	0.656713	0	0.0174489	0.710284	0.836281	0.910327	0.926181	0.991747	0.957865	0.936501	1
FBtr0079697	CG13097	6	0	0.00446878	0.658762	0.799458	0.851503	0.835402	0.847569	0.877115	0.89378	0.94078	0.956454	0.991253	0.957223	1
FBtr0343426;FBtr0079698	CG13096	6	0.168292	0	0.286403	0.736436	0.786444	0.823204	0.858221	0.878273	0.906299	0.937004	0.972321	1	0.952786	0.999164
FBtr0340242;FBtr0302160;FBtr0079704;FBtr0079703	fu12	4	0.98384	0.863561	0	0.05642	0.0344217	0.0520434	0.0622051	0.0206397	0.0465204	0.697652	0.770586	0.812486	0.918967	1
FBtr0307091;FBtr0079727	Glt	4	0.553769	0.457465	0.5219	0.585673	0.520792	0.0332693	0.0311896	0.00524062	0	0.287193	0.417387	0.499005	0.678113	1
FBtr0332187;FBtr0332186;FBtr0079759	CG18088	2	0.0853596	0	0.0723205	0.0622594	0.174511	0.0968899	0.105765	0.694038	0.855587	0.900634	1	0.847627	0.768119	0.688192
FBtr0331454;FBtr0331453;FBtr0079782	rost	5	1	0.871994	0.748387	0.554393	0.444718	0.42009	0.457686	0.454512	0.599637	0.346435	0.486746	0.429839	0.385122	0
FBtr0079799	Cks30A	6	0.0521538	0	0.044891	0.970408	0.983501	0.937698	0.995365	0.935497	1	0.922776	0.912603	0.97773	0.926514	0.785709
FBtr0079840;FBtr0079839	Trx-2	3	0	0.0410558	0.116872	0.9434	0.776052	0.750024	0.858468	0.85526	0.816498	0.789954	1	0.809387	0.905145	0.81798
FBtr0079841;FBtr0079842;FBtr0302199	GlcAT-S	1	0.969655	1	0.941223	0.771981	0.893068	0.801544	0.855371	0.704731	0.00136055	0	0.0480343	0.0452965	0.0424345	0.0505147
FBtr0079848	CG4364	6	0.261318	0	0.231488	0.557136	0.563969	0.666455	0.699011	0.698791	0.768886	0.790888	0.917956	0.956399	0.897768	1
FBtr0079865	zf30C	6	0.028926	0	0.0086096	0.687002	0.793118	0.721619	0.756774	0.832677	0.839545	0.882791	0.936763	0.97766	0.901548	1
FBtr0079874	Bka	6	0.0417145	0.0668406	0	0.519349	0.765334	0.723353	0.733523	0.769495	0.862903	0.834976	0.922258	1	0.900106	0.969328
FBtr0303901;FBtr0309209;FBtr0079890;FBtr0329986;FBtr0309210;FBtr0309211	CG5850	1	0.748113	1	0.732417	0.717991	0.768982	0.0171782	0.0471187	0.0351094	0	0.719823	0.639721	0.524915	0.531855	0.526404
FBtr0345615;FBtr0331635;FBtr0079894	CG5853	5	0.00562348	0.00913889	0.161551	0.0747119	0.0881745	0	0.0149454	0.014736	0.629666	0.713197	0.869944	0.82237	0.866054	1
FBtr0079895	Apf	6	0.0916301	0	0.0566728	0.937484	0.854665	0.88401	0.938986	0.946653	1	0.824612	0.895267	0.919225	0.876044	0.894328
FBtr0079896;FBtr0331636	CG31712	2	0.0603225	0	0.130263	0.111134	0.239484	0.0519271	0.0700309	0.958171	0.749867	0.718358	0.865259	0.934872	0.85709	1
FBtr0079924	Taf11	2	0.0323272	0	0.00900106	0.0865192	0.0308505	0.0380426	0.160781	0.0130666	0.0623656	1	0.970283	0.92433	0.0657949	0.119063
FBtr0079929;FBtr0329984	bib	6	0.0218368	0	0.0241787	0.816988	0.892401	0.979396	0.960491	1	0.895897	0.870876	0.60773	0.551646	0.0221193	0.0129984
FBtr0079951	eEF1delta	2	0.75602	0.896486	0.949157	0.7208	1	0.000905049	0.0809607	0	0.837702	0.759457	0.703428	0.77149	0.971988	0.863268
FBtr0079962	Ripalpha	2	0.0328256	0.87942	0.968614	0.97897	0.937246	0.954203	0.912999	0.866185	1	0.0145323	0.0237461	0	0.0768952	0.050517
FBtr0333098;FBtr0333097;FBtr0079993	GATAd	6	0.0599733	0.122062	0.0482689	1	0.0568509	0	0.946195	0.881632	0.847268	0.956325	0.943786	0.984454	0.985238	0.847809
FBtr0080006	CG5096	4	0.030891	0.0183204	0.0123997	0.0133639	0.0622749	0.0897115	0.0645227	0.101209	0.0435489	0	0.671175	0.763378	0.814583	1
FBtr0332196;FBtr0332195;FBtr0080008	da	2	0.203366	0.0954566	0.0997335	0.198037	0	0.248307	0.718503	0.770736	0.805838	0.844989	0.7989	0.799023	1	0.695691
FBtr0304138;FBtr0080036;FBtr0080035	Myo31DF	5	0.41779	0.284436	0.60647	0.0453163	0	0.091198	0.263741	0.349641	0.392422	0.708508	0.881997	0.834745	0.863771	1
FBtr0080038	CG7456	2	0.932294	0.927236	0.0113312	0.0288493	0.018951	0.0182233	0.0156661	0	0.953324	0.98088	0.985267	1	0.980913	0.939513
FBtr0331671;FBtr0080092	Lrr47	1	0.761732	0.860997	1	0.910513	0.813964	0.0211786	0.110307	0.0332325	0.0717996	0	0.0805338	0.0456689	0.098456	0.117146
FBtr0080108	CG6415	5	0.511955	0.0202895	0	0.0856132	0.0397615	0.00527856	0.0250055	0.589181	0.686649	0.817392	0.862078	0.869091	0.874958	1
FBtr0080110	CG6443	6	0.0605717	0.0119808	0	0.828985	0.964737	0.878058	1	0.918357	0.93367	0.893537	0.941085	0.90188	0.874208	0.865325
FBtr0337007;FBtr0080134;FBtr0080133;FBtr0337006	Fatp	5	0.576815	0.615603	0.499217	0.232852	0	0.184931	0.0783808	0.432262	0.802976	0.681451	0.989917	0.928612	0.890142	1
FBtr0340549;FBtr0080146	YL-1	6	0	0.0343875	0.0707154	0.841751	0.799323	0.925669	0.928543	0.940766	0.883328	0.884477	0.884352	0.925319	0.898886	1
FBtr0080162	Art8	6	0.0554399	0	0.0691113	0.935875	0.928501	0.931587	0.968391	0.978207	1	0.902135	0.954103	0.821064	0.942449	0.848261
FBtr0340552;FBtr0340551;FBtr0080172;FBtr0080171;FBtr0080170	CG33129	2	0.947458	0.987846	0.940714	0	0.00366969	0.00925044	0.921069	0.916667	1	0.897513	0.774077	0.948772	0.795849	0.639795
FBtr0080200	CG4751	6	0	0.817794	0.787218	0.860424	0.860335	0.923079	0.931726	0.931846	0.945623	0.94601	0.95134	1	0.968081	0.990578
FBtr0080229	CG6201	5	1	0.966384	0.934238	0	0.00290454	0.823004	0.893906	0.858356	0.898134	0.0621136	0.00486268	0.0579664	0.90329	0.821944
FBtr0080313	CG6746	5	0.871501	0.835854	0.968723	0.0379467	0	0.00994561	0.0385509	0.0579398	0.585383	0.897082	0.847856	0.939696	0.885468	1
FBtr0080358	CG6583	2	0.807722	0.850339	0.727554	0.614619	0.685305	0.76232	0.00185871	0	0.788093	0.861198	0.87993	1	0.942845	0.84404
FBtr0080364	CG6712	6	0.0296953	0	0.71059	0.639014	0.566802	0.710284	0.740655	0.7144	0.830595	0.831833	0.914122	0.950367	0.936047	1
FBtr0333093;FBtr0333094;FBtr0080388	CG5446	6	0.129608	0	0.0919363	0.946966	0.840647	0.957309	0.8856	1	0.02104	0.0479422	0.978718	0.887919	0.975037	0.954364
FBtr0340541;FBtr0080394	CG6153	6	0.0337328	0	0.0708052	0.914985	0.918257	0.956437	1	0.981491	0.996178	0.967896	0.842544	0.888861	0.874301	0.887784
FBtr0336618;FBtr0080429	Vha68-1	4	0.00939207	0.0532243	0.0539253	0.00658697	0.0295633	0	0.0229982	0.125226	0.043959	0.506543	0.652391	0.772266	0.805801	1
FBtr0080430	CG12404	6	0.025761	0.00400285	0	0.939013	0.986317	1	0.95813	0.960864	0.894255	0.895613	0.912139	0.989313	0.891886	0.943743
FBtr0080434	Sir2	6	0.038637	0	0.0740784	0.750751	0.874015	0.760414	0.848244	1	0.771543	0.609055	0.679366	0.683132	0.812429	0.539232
FBtr0080436	CG5287	5	0.950638	0.888065	0.896	1	0.848442	0	0.0203652	0.675513	0.73589	0.824535	0.770901	0.767284	0.877745	0.901413
FBtr0080439;FBtr0334752;FBtr0080440;FBtr0080441	Pect	3	0	0.0146644	0.0534466	0.871571	0.831948	0.858043	0.861785	0.925029	0.894825	0.889992	1	0.982929	0.931084	0.986194
FBtr0080465	CG6523	6	0.275726	0.055539	0	0.873191	0.88814	0.897999	0.898039	0.915311	1	0.910925	0.974491	0.805611	0.972141	0.801015
FBtr0080466	Tap42	6	0	0.20687	0.164149	0.887538	0.961726	0.986557	1	0.907513	0.865031	0.801358	0.798406	0.739843	0.795528	0.653308
FBtr0305555;FBtr0080489	CG16974	1	1	0.771792	0.780919	0.496861	0.374216	0.29656	0.395354	0.19935	0.313882	0.145082	0.389792	0.225828	0	0.0999169
FBtr0080499	CG7099	2	0.091776	0.08589	0	0.0465971	0.114546	0.129541	0.0921513	0.0466173	0.0641149	0.103884	0.934193	1	0.926981	0.888799
FBtr0342906;FBtr0342905;FBtr0080511	ics	3	0.106197	0.0417549	0	0.855173	0.940443	0.922197	0.917036	0.84975	0.841052	0.898663	0.943487	1	0.941352	0.985014
FBtr0332509;FBtr0080514;FBtr0080513	B4	1	0.0759095	0.581277	1	0.756656	0.662214	0.529341	0.597146	0.0286126	0.0794191	0.144159	0.0998719	0.0319322	0.0598048	0
FBtr0080526;FBtr0080525	CG9293	6	0.0966872	0	0.212336	0.15739	0.85952	0.91792	0.917915	0.9307	0.937906	0.983276	1	0.920334	0.161359	0.200358
FBtr0343656;FBtr0080531	CG31813	4	0	0.0334837	0.0376305	0.0660462	0.0721122	0.0620685	0.0408615	0.078442	0.0850811	0.0594906	0.0596933	0.870629	0.972098	1
FBtr0343667;FBtr0080553;FBtr0080552	Ance	3	0.0160659	0.00658221	0	0.529273	0.694833	0.66943	0.764496	0.776505	0.861928	0.911263	1	0.960581	0.892207	0.979582
FBtr0080557	CG16884	4	0.043742	0.0491633	0.0332176	0.0684923	0.0222413	0.0316756	0.0237542	0.0288474	0.031164	0.00632787	0.0296779	0	0.731745	1
FBtr0080558	CG16885	4	0.0408667	0.0343936	0.000787982	0.0657291	0	0.0151862	0.0356823	0.0382237	0.01742	0.00320452	0.0369445	0.0701581	0.76172	1
FBtr0302990;FBtr0080560	CG16886	4	0.0794862	0.101902	0.0407669	0.0547437	0.0659388	0	0.0536005	0.0418363	0.0258733	0.0850631	0.0462911	0.0476385	0.0612954	1
FBtr0343669;FBtr0080562;FBtr0080561	Smg5	3	0.0817927	0	0.583841	0.873821	0.882958	0.984829	1	0.97356	0.947379	0.951823	0.923956	0.939591	0.930643	0.938457
FBtr0080591	CG4500	3	0.802194	0	0.51815	0.466841	0.512595	0.708209	0.761559	0.832289	0.887289	0.906966	1	0.988907	0.935821	0.901862
FBtr0332520;FBtr0111015;FBtr0111014;FBtr0080676;FBtr0332521	mol	1	1	0.879142	0.73065	0.00773469	0.0162976	0.0112606	0	0.0166235	0.014527	0.0509424	0.0168083	0.0842665	0.0505972	0.0313001
FBtr0080693	dyn-p25	2	0.052786	0.00731362	0.0358287	0.932645	0.947337	1	0.902447	0.903512	0.0708599	0.00396933	0	0.0720125	0.0206674	0.0129712
FBtr0080695	NC2beta	2	0.0429641	0.046011	0	0.0318354	0.0589998	0.0615749	0.0564682	0.0538964	0.877904	0.725766	0.846852	0.996596	0.963274	1
FBtr0345641;FBtr0080699	yellow-c	4	0.110295	0.124695	0	0.117519	0.138924	0.119311	0.160916	0.130319	0.0761519	0.125573	0.131738	0.116441	0.823849	1
FBtr0343687;FBtr0343686;FBtr0080724;FBtr0080723	ck	3	0	0.384267	0.562148	0.620295	0.618874	0.630826	0.681694	0.684991	0.651289	0.691904	0.75027	0.771848	0.908002	1
FBtr0080761;FBtr0305560	CG3793	2	0.0741202	0.125331	0.0153592	0.835261	0.84853	0.941368	0.934389	0.887704	1	0.897802	0.0623824	0	0.0168106	0.0809315
FBtr0343721;FBtr0080769;FBtr0080768;FBtr0080767;FBtr0080765	Gli	3	0.00151139	0.00661584	0	0.84931	0.883677	0.981019	0.698029	0.86285	0.862528	0.899624	0.991143	0.953309	0.940506	1
FBtr0080777;FBtr0080776;FBtr0080775;FBtr0080774;FBtr0080773;FBtr0305561	CycE	2	0.866288	1	0.951959	0.918187	0.810273	0.751094	0.751464	0.655931	0.793583	0	0.161643	0.0676254	0.0254471	0.109181
FBtr0080804;FBtr0080803;FBtr0080805	BicC	1	1	0.98464	0.856221	0.396645	0.0614407	0.0338088	0.036768	0.0548113	0.0468149	0.0442903	0.0345126	0.0512521	0.0519845	0
FBtr0080825	CG4935	2	0	0.0566331	0.0470584	0.78578	0.0585326	0.0802369	0.0859579	0.0275794	0.839741	0.876896	0.915943	1	0.914674	0.830718
FBtr0080833	fzy	2	1	0.985401	0.961763	0.89402	0.934791	0.930513	0.925569	0.850298	0.664665	0.515738	0.00762062	0.0568774	0.0123545	0
FBtr0080836	CG4455	6	0.0828237	0.13431	0.0330334	0.776175	0.802464	0.886519	0.787452	1	0.999395	0.952024	0.911598	0.845803	0.790571	0
FBtr0321313;FBtr0080839;FBtr0080838	chif	6	0.039597	0	1	0.969261	0.943512	0.930369	0.971263	0.999267	0.93729	0.99861	0.924952	0.906403	0.919452	0.98768
FBtr0080851	CG5869	6	0.0363948	0.0612755	0.0402788	0	0.0294898	1	0.834965	0.810081	0.917538	0.885963	0.966131	0.923084	0.984346	0.899542
FBtr0080852	heix	6	0	0.848811	0.932887	0.88449	0.914126	0.869147	0.828062	0.964201	0.937871	0.920876	1	0.967163	0.99535	0.969156
FBtr0340234;FBtr0080880	CG5888	6	0.0658216	0.112552	0	0.965013	0.853029	0.992725	0.95516	0.956056	0.964059	0.94102	1	0.941693	0.932239	0.917394
FBtr0080886;FBtr0080885;FBtr0080884;FBtr0339514;FBtr0100459	grp	2	0.130045	0.981136	1	0.963158	0.819478	0.923229	0.917297	0.872198	0.831377	0.0765266	0.141449	0.123981	0.147258	0
FBtr0343768;FBtr0080894	yellow-b	4	0.0171063	0	0.0115679	0.0359963	0.0681175	0.000683195	0.00682528	0.0271894	0.0493603	0.695564	0.716524	0.828302	0.807009	1
FBtr0331620;FBtr0080909	Ugt36Ba	5	0.0368586	0.0890951	0.0290537	0.0522887	0.0819256	0.0855817	0.0710768	0	0.00315805	0.793853	0.750403	0.861955	0.949687	1
FBtr0344850;FBtr0080912;FBtr0080911	Ugt36Bc	3	0.0621981	0.0392404	0	0.0243582	0.00675857	0.551766	0.590594	0.815333	0.865293	0.809578	0.969463	0.95564	0.88549	1
FBtr0345747;FBtr0080926;FBtr0332333;FBtr0332334;FBtr0080927	CG13284	4	0.0533589	0.0328447	0.0600867	0.0582616	0.0596993	0.0454248	0.0505632	0.0606308	0.0719279	0	0.669276	0.731937	0.736454	1
FBtr0331931;FBtr0080932	Cyt-b5-r	3	0.0312639	0.0428435	0	0.0230034	0.0283575	0.54123	0.694345	0.864449	0.902624	0.887446	1	0.944008	0.916557	0.863037
FBtr0080937	CG17996	3	0	0.0392983	0.0382274	0.904113	0.95508	0.824719	0.88663	0.892741	0.900524	0.807998	0.874252	1	0.856042	0.934554
FBtr0080957	CG12288	6	0.0465362	0.0355256	0	0.765641	0.802598	0.774829	0.777956	0.827736	0.858177	0.919458	0.927482	0.987214	0.948134	1
FBtr0080979	CG15141	6	0	0.0720884	0.672917	0.922636	0.908051	0.920868	1	0.965582	0.984557	0.861795	0.852833	0.826967	0.884677	0.783792
FBtr0080996;FBtr0080997;FBtr0306165	qua	5	0.920405	0.970332	0.807897	0.868507	1	0.87765	0.856264	0.0435369	0.0421394	0.0671559	0	0.796238	0.851171	0.882835
FBtr0343824;FBtr0081069	CG10211	4	0.45135	0	0.0166953	0.0170345	0.0371371	0.00662777	0.100891	0.0186592	0.0140951	0.0228239	0.228535	0.353204	0.519856	1
FBtr0081070;FBtr0343825;FBtr0343826	CG15160	6	0.043872	0.0609573	0	0.770901	0.737464	0.805772	0.918182	0.883642	0.94302	0.863237	0.93219	1	0.958198	0.988462
FBtr0081077	Cyp310a1	6	0.00890037	0	0.00684886	0.782659	0.810712	0.661804	0.733272	0.801047	0.823945	0.800377	0.9665	1	0.906359	0.948111
FBtr0081086;FBtr0081085;FBtr0300676;FBtr0300675	CG10283	5	0	0.115324	0.1199	0.077574	0.131614	0.0682741	0.139445	0.0772404	0.115702	0.983742	0.804364	0.82784	0.899704	1
FBtr0081088	ncm	6	0	0.0554721	0.702916	0.936642	0.943081	0.959125	0.913441	0.959016	0.958347	0.897555	0.994094	1	0.967524	0.989284
FBtr0344023;FBtr0081093;FBtr0081092	CG31751	3	0.025757	0	0.0414122	0.0753975	0.0277955	0.709859	0.815432	0.882824	0.890174	0.686202	0.857301	0.854732	0.847264	1
FBtr0273194;FBtr0081095	CG10336	6	0.104314	0	0.986223	0.943003	0.768117	0.884939	0.869853	0.990899	0.805465	1	0.690573	0.727591	0.746129	0.135955
FBtr0343108;FBtr0081096	CG10338	2	0.0647583	0.00263383	0.0381232	0	0.00580764	0.0390013	0.119589	0.0227668	0.824238	0.956799	0.967977	0.983907	0.780062	1
FBtr0081099	Grip71	2	0.936286	0.940854	1	0.947348	0.901588	0.935797	0.969814	0.881999	0.829774	0.79467	0.612832	0.417904	0.542698	0
FBtr0343833;FBtr0308575;FBtr0308574;FBtr0081104	CG17323	5	0	0.0285519	0.0703208	0.0404291	0.0161469	0.00736091	0.0392275	0.0401936	0.600516	0.674796	0.961206	1	0.84965	0.966457
FBtr0081128	CG10376	2	0.095188	0.0196129	0	1	0.917734	0.916892	0.963725	0.935597	0.0400215	0.0783436	0.0624628	0.0250837	0.0651856	0.0187897
FBtr0343118;FBtr0081130	msl-1	6	0.00417757	0	0.0795848	0.0309253	0.0467782	0.854987	0.930602	0.841913	0.853921	0.913901	0.925511	1	0.938121	0.929843
FBtr0081156	l(2)37Cd	6	0.0739995	0.0515261	0	0.892692	0.831086	0.651903	0.0963431	0.137377	0.923171	0.831923	0.890099	0.871351	1	0.953935
FBtr0081161;FBtr0332577;FBtr0336628	l(2)37Cg	6	0.0200975	0	0.0666195	0.867498	0.896451	0.775174	0.777754	0.782659	0.788971	0.852389	0.916796	0.978737	0.899048	1
FBtr0081180	hk	6	0.0562277	0.0266498	0	0.848307	0.879691	0.889782	0.918898	0.915399	1	0.963867	0.940858	0.912602	0.958539	0.8727
FBtr0081195;FBtr0330209	drl	5	0.00665656	0.0478243	0	0.0625953	0.0825094	0.0579105	0.0329838	0.0401303	0.93425	0.842588	0.9885	1	0.961993	0.913395
FBtr0081206	Rab9	4	1	0.897749	0.811621	0.0642056	0.108244	0.102482	0.115651	0.147231	0.0780542	0.115993	0	0.0744969	0.0478659	0.102197
FBtr0310645;FBtr0081220;FBtr0081219;FBtr0300823;FBtr0081221	CG17549	4	0.853075	1	0.909274	0.811374	0.753473	0.82178	0.759849	0.709056	0.0236866	0.0754158	0.00552771	0.049048	0.825125	0
FBtr0081258	msb1l	6	0.031458	0.105301	0.0198647	0.969173	0.976561	0.910673	0.990518	1	0.835926	0.870229	0.59133	0.450599	0.744757	0
FBtr0300967;FBtr0300966;FBtr0332179;FBtr0081318	CdGAPr	6	0	0.0322905	0.976061	0.958392	0.882969	0.88708	0.963165	0.994572	0.982004	1	0.99643	0.941049	0.946661	0.986607
FBtr0081332	neb	6	0	0.0779079	0.0330315	0.810761	0.799576	0.887464	1	0.93726	0.984229	0.929518	0.721824	0.0203131	0.0232203	0.0453643
FBtr0081340	Taf13	2	0.110167	0.144082	0.067847	0.122318	0.167659	0.0555236	0.0537262	0.0971291	0.11333	0	0.961305	0.96335	1	0.940245
FBtr0081347	vls	6	0.0552775	0	0.0698923	0.949141	0.93576	0.95738	0.99794	0.947899	1	0.913233	0.974263	0.911478	0.919318	0.939411
FBtr0081414	Pomp	2	0.0195981	0	0.0371863	1	0.821493	0.835554	0.641588	0.724327	0.630561	0.591239	0.00275419	0.00348639	0.0191363	0.0101719
FBtr0081427;FBtr0307498	CG9336	4	0.617735	0.506807	0.0345423	0.0411488	0	0.058995	0.0395915	0.0270441	0.102827	0.485678	0.836034	0.904372	0.881368	1
FBtr0333009;FBtr0081428	CG9338	4	0.0221974	0	7.89819e-05	0.0242949	0.0245757	0.0543274	0.0192107	0.00780654	0.0270405	0.0115334	0.789418	0.899055	0.83287	1
FBtr0081472	CG9246	6	0	0.149488	0.420858	0.747214	0.793418	0.805042	0.793982	0.809495	0.874957	0.904282	0.939286	0.959718	0.90612	1
FBtr0081475	Mcm10	2	0.856029	0.906371	1	0.737267	0.705858	0.752706	0.763994	0.793073	0.796749	0.678718	0	0.006024	0.0566084	0.0201461
FBtr0346451;FBtr0081501	E2f2	6	0.0199036	0.0186016	0	0.553106	0.693017	0.717198	0.798893	0.804601	0.821043	0.878063	0.937771	1	0.942159	0.959565
FBtr0081520;FBtr0081519;FBtr0081518;FBtr0333355	nrv3	4	0	0.0107745	0.0876943	0.0297251	0.0441754	0.0201648	0.0348388	0.05363	0.0836894	0.11705	0.536904	0.652884	0.702822	1
FBtr0081544	alpha-Est1	1	1	0.962285	0.887113	0.770347	0.605564	0.0205188	0.0590306	0.0918332	0.0386089	0.0360143	0.0457183	0	0.00180515	0.0107838
FBtr0081559	CG1142	6	0	0.0273915	0.050457	0.750743	0.929922	0.848693	0.9026	0.931929	0.927585	0.966307	0.999698	0.991061	1	0.986628
FBtr0081563	CG10098	3	0	0.0630138	0.0365688	0.9317	0.918997	0.920749	0.934001	0.942245	0.937857	0.941761	0.973904	0.947538	0.961956	1
FBtr0081568	CG2656	6	0	0.0119893	0.0760495	0.820623	0.942078	0.931785	0.918968	0.998025	1	0.943243	0.940531	0.874466	0.891769	0.0475192
FBtr0081569	Sas-4	2	1	0.846439	0.750075	0.806957	0.770717	0.855258	0.734218	0.727687	0.747583	0.913026	0.00558303	0.0533915	0.0466692	0
FBtr0334884;FBtr0081571;FBtr0334885;FBtr0081570	sas	5	0.0481382	0.0840596	0.105689	0.0947067	0.0783421	0.11887	0	0.106825	0.0901842	0.802678	0.905308	0.905419	0.913997	1
FBtr0081577	CG10050	6	0	0.138809	0.0452448	0.972553	0.992772	0.910756	1	0.122647	0.134804	0.945835	0.89779	0.938258	0.872208	0.15783
FBtr0081599	CG1234	6	0	0.0132922	0.295834	0.56188	0.593185	0.639013	0.720244	0.764584	0.844907	0.850561	0.917841	0.970063	0.89899	1
FBtr0081605	CG10055	2	0.205491	0.115248	0.110141	0.842451	0.965231	1	0.924891	0.094631	0.1439	0.12826	0.134429	0.149044	0.117089	0
FBtr0081611	CG10068	1	0.108657	0.139512	0	0.0208706	0.0652618	0.104353	0.0760038	0.0789921	0.032291	0.080653	0.0389391	0.067343	1	0.923562
FBtr0346967;FBtr0081617;FBtr0081616	Mlp84B	4	0.0950122	0	0.0606061	0.0703353	0.0807063	0.0501948	0.067213	0.0725948	0.0655067	0.0638017	0.369913	0.485326	0.547912	1
FBtr0081620;FBtr0081619;FBtr0081618	Ama	6	0.40317	0.272536	0	0.659958	0.752658	0.835612	0.901747	0.956191	0.964488	0.954628	1	0.95009	0.918569	0.944681
FBtr0081689	Ccp84Ag	4	0.0384091	0.0286131	0.0647434	0.0276986	0.0117655	0	0.0441358	0.0179424	0.0288785	0.562623	0.643998	0.699832	0.87312	1
FBtr0081694	Ccp84Ae	4	0.0155081	0.0413985	0.041315	0.0855172	0.0664868	0.0611492	0.0463206	0.0420406	0	0.0959424	0.751565	0.692621	1	0.997033
FBtr0081708	Osi20	4	0.0730607	0.0597323	0.00195839	0.0103996	0.0191392	0	0.0376036	0.0161508	0.0287694	0.0521682	0.542587	0.612501	0.694979	1
FBtr0081729	Neurochondrin	4	0.057173	0.0324802	0.0681756	0.035163	0.0351804	0.0417715	0.0372118	0.0418479	0	0.433889	0.832762	0.942288	0.917337	1
FBtr0339181;FBtr0339180;FBtr0081740	Sp7	1	1	0.8363	0.801456	0.0912758	0.0107132	0.0347829	0.0354782	0.0145601	0.0475973	0.0316544	0.0502174	0	0.0218237	0.0886632
FBtr0114520;FBtr0081756	Taf7	6	0	0.0053839	0.908773	0.888148	0.883235	0.934108	0.942376	0.83072	0.880615	0.906218	0.955087	1	0.958774	0.993577
FBtr0339712;FBtr0081763	CG2846	3	0.109916	0	0.044546	0.130003	0.0474457	0.118384	0.977894	0.954097	0.921289	0.899009	0.921461	1	0.834062	0.945445
FBtr0339713;FBtr0081765	CG2943	2	0.942276	1	0.963501	0.965579	0.0432919	0.0477753	0	0.820454	0.813551	0.829238	0.794862	0.824392	0.824233	0.757693
FBtr0081780	pyd3	5	0.0946471	0	0.103201	0.0735074	0.0628787	0.0310635	0.0107414	0.0616027	0.903502	0.855281	0.894253	0.962289	1	0.814052
FBtr0310411;FBtr0081787	CG10903	2	0.079952	0.0672673	0.0459574	0	0.0587947	0.089979	0.0481444	0.0107246	0.910558	1	0.973003	0.996437	0.81749	0.853678
FBtr0081816	CG11035	1	1	0.812265	0.67878	0.808912	0.862587	0.665042	0.797646	0.0591989	0	0.050044	0.135144	0.108926	0.04989	0.0458683
FBtr0081866	CG9630	2	0	0.163947	0.0885911	0.1259	0.0787411	0.119102	0.102062	0.0949506	0.853855	0.81277	0.904574	1	0.930794	0.981695
FBtr0081914	CG8202	2	0.110242	0.0523197	0.128107	0.0963492	0.0832708	0.144599	0	0.0698681	0.887998	0.841456	0.87448	1	0.093493	0.123127
FBtr0334332;FBtr0081934	CG9839	6	0.0651685	0.0104887	0	0.602625	0.667362	0.609325	0.730272	0.781811	0.853026	0.903022	0.941724	0.987102	0.935726	1
FBtr0081953	CG9773	6	0.0845145	0.0947549	0.186472	0	0.105651	0.806152	0.801728	0.824663	0.876372	1	0.917007	0.863458	0.967284	0.858246
FBtr0081954	osk	1	1	0.908175	0.0689198	0.0854337	0.0492935	0.102903	0.0914276	0.0735953	0.042261	0	0.0453505	0.0950638	0.0371311	0.0700907
FBtr0346139;FBtr0081959	CG11970	6	0.0175532	0	0.555194	0.94002	0.818947	0.862335	0.903217	0.889683	0.918868	0.92841	0.984034	0.981299	1	0.994568
FBtr0336755;FBtr0082005	tgo	6	0.0652178	0.0558355	0	0.910296	0.910333	0.988741	0.983425	1	0.998937	0.973166	0.956462	0.963152	0.916668	0.953997
FBtr0082006	CG11985	6	0	0.0141313	0.0380383	0.887941	0.893631	0.79647	0.874971	0.850745	0.895776	0.802103	0.955288	1	0.939152	0.975273
FBtr0082031;FBtr0334302	alpha-Man-II	2	0.124936	0.106899	0.11526	0	0.108866	0.137607	0.103989	0.0879183	0.866393	0.867675	0.870056	0.985182	1	0.99019
FBtr0082048;FBtr0082047	CG9356	6	0	0.0627731	0.00676109	0.894757	0.932675	0.898198	1	0.920593	0.97332	0.802609	0.835269	0.932544	0.88482	0.841136
FBtr0082062	Rlb1	6	0.0520989	0.00263464	0	0.038303	0.0983057	0.0580407	0.775057	0.804502	0.890064	0.830469	0.914628	1	0.862007	0.992795
FBtr0082069;FBtr0334654;FBtr0082068	MBD-like	6	0	0.0381177	0.952822	0.815856	0.927833	0.900641	1	0.90917	0.960814	0.883523	0.986634	0.885143	0.978128	0.972362
FBtr0082087	alphaTub85E	4	0.0584566	0.0603544	0	0.1217	0.0182026	0.0668528	0.0685656	0.0718975	0.0764162	0.783068	0.876633	0.840709	0.871486	1
FBtr0306008;FBtr0082102	Scm	2	0.0324546	0.108316	0.0302957	0.105435	0	0.0887391	0.0550984	0.10585	0.978778	0.793955	0.900788	1	0.921656	0.886906
FBtr0082124;FBtr0305340	RhoL	5	0.108764	0	0.0411778	0.0440813	0.0897884	0.0242384	0.100692	0.107862	0.787338	0.809403	0.887239	0.908191	0.877023	1
FBtr0082126;FBtr0113210	Pnn	6	0.0350641	0	0.67823	0.777038	0.808586	0.784864	0.833292	0.86475	0.900767	0.882588	0.963681	0.966133	0.93222	1
FBtr0082131	CG8417	3	0.0418988	0	0.0464639	0.989524	0.894183	0.987592	0.955198	0.921931	1	0.912583	0.921143	0.930506	0.972256	0.938706
FBtr0082163	Snap24	3	0	0.783679	0.831056	0.87305	0.858724	0.881243	0.904246	0.883957	0.879476	0.946229	0.896961	0.934918	1	0.933491
FBtr0082204	CG12811	4	1	0.791604	0.0293367	0.0905098	0.0765493	0.0109767	0.0735079	0.097432	0.0491351	0.0589663	0.0631529	0.0629211	0.0464233	0
FBtr0347213;FBtr0347212;FBtr0082213;FBtr0082212;FBtr0082210;FBtr0082209;FBtr0306608;FBtr0306609;FBtr0347214;FBtr0082207;FBtr0082208;FBtr0347211	Mical	3	0	0.0510687	0.00647874	0.0493214	0.716222	0.90029	0.809824	0.801665	0.85036	0.930441	0.972361	0.895329	1	0.992348
FBtr0337048;FBtr0082225	CG3999	5	0.345228	0.0185076	0.0162089	0.162748	0	0.0704486	0.332619	0.791408	0.766495	0.858365	0.883921	0.872778	0.845048	1
FBtr0337051;FBtr0082240	CG6293	1	1	0.861314	0.739767	0.0388786	0.042289	0.0470754	0.051234	0.0320226	0.0298403	0.0444846	0.0593828	0	0.0334795	0.0269157
FBtr0082256;FBtr0082255;FBtr0344145;FBtr0100455;FBtr0100454	hth	3	0.0633334	0.0520541	0	0.0459651	0.0690522	0.0561131	0.678633	0.853936	0.843421	0.941443	1	0.7882	0.840897	0.877368
FBtr0082266;FBtr0082265;FBtr0305662;FBtr0100144;FBtr0082264	pug	5	0.046318	0.0361403	0.0110969	0.0608064	0.0481457	0	0.00370431	0.947351	0.8148	0.832939	0.884921	0.89402	0.956471	1
FBtr0082287	CG4570	2	0.104964	0.199815	0.0574186	0.012459	1	0.995117	0.969342	0.835545	0.046542	0.0570161	0.069901	0.0479848	0.0251864	0
FBtr0273346;FBtr0273347;FBtr0082292;FBtr0273345;FBtr0082291;FBtr0306641;FBtr0082294;FBtr0082295	SelR	3	0.018031	0.000366765	0	0.985819	0.808703	0.987179	0.0149663	0.0345603	0.883381	0.967488	0.918445	1	0.953282	0.867805
FBtr0302935;FBtr0082329	CG6621	6	0.039245	0	0.938904	0.986195	0.939502	0.94739	0.876839	0.963382	0.952945	0.864758	0.991815	0.962992	0.969142	1
FBtr0082361;FBtr0082360;FBtr0308073	CG17734	4	0.921857	1	0.910884	0.723141	0.782371	0.756187	0.684946	0.624552	0.0142859	0.0309991	0	0.0184006	0.05948	0.0325438
FBtr0082365	CG17187	2	0.0167212	0.0140255	0.907379	0.99959	1	0.936234	0.950886	0.972675	0.000215964	0.0097175	0.0193968	0	0.00921569	0.0240947
FBtr0308211;FBtr0082402	CG6744	2	1	0.885283	0.795714	0	0.0278604	0.0593158	0.0661141	0.021602	0.860392	0.798006	0.761422	0.69027	0.696934	0.658175
FBtr0082431	CG14722	6	0	0.00835073	0.0451899	0.79659	0.787865	0.858781	0.876641	0.868607	1	0.927134	0.970299	0.976157	0.995794	0.963965
FBtr0082458;FBtr0082459	CG6791	2	0.0754059	0.0651358	0	0.0819325	0.068725	0.0840421	0.0817665	0.117964	0.103139	0.108424	0.922282	0.76141	0.840035	1
FBtr0082506	CG18547	5	0.0855127	0	0.0550402	0.0708766	0.03198	0.075876	0.950591	1	0.052643	0.0804968	0.736573	0.0747744	0.135728	0.0897587
FBtr0082507;FBtr0335438	CG10005	2	0.0988079	0.0820553	0.121917	0.0995111	0.0690343	0.122521	0.12035	0.0607224	0	0.810887	0.892176	0.933416	1	0.893569
FBtr0299594;FBtr0082517	CG6959	5	0.0983891	0	0.0489224	0.0810249	0.0769509	0.062614	0.0985156	0.0767456	0.0465672	0.737345	0.954951	0.986193	1	0.941837
FBtr0082535;FBtr0082534	Lk6	6	0	0.0012704	0.856458	0.916914	0.898363	0.95541	0.939785	0.935454	0.930755	0.849437	1	0.6989	0.881608	0.762782
FBtr0335433;FBtr0082555	CG3313	6	0.166726	0.121147	0	0.086095	0.235558	0.799079	0.866698	0.943039	0.915388	0.96702	1	0.961942	0.880389	0.975314
FBtr0082568	CG4115	4	0.645553	0.22457	0.0643455	0.0689437	0.0503779	0	0.0522026	0.0478889	0.043157	0.051369	0.495067	0.626613	0.756787	1
FBtr0082570	GstD3	3	0.119135	0.163751	0	0.873278	1	0.898516	0.885517	0.862961	0.916143	0.845034	0.840336	0.898924	0.815388	0.771147
FBtr0082572	GstD5	5	0.19477	0.08376	0.184202	0.15852	0.143757	0.192365	0	0.0870634	0.0549689	0.0615726	0.908675	0.863121	0.623625	1
FBtr0082598	Cyp9f2	5	0.043004	0.0406391	0.0821375	0.0410648	0.0538632	0	0.0842963	0.0306265	0.66626	0.908608	0.93724	0.937402	0.926842	1
FBtr0082600	lig3	6	0	0.0588231	0.872712	0.949748	0.945623	0.906534	0.909144	0.981562	0.878052	0.940189	0.943102	0.899947	1	0.975493
FBtr0344387;FBtr0082606	CG10035	2	0.0744409	0.0782304	0	0.908311	0.973687	0.971397	1	0.949122	0.718849	0.0485426	0.0202094	0.0753247	0.0750774	0.0165855
FBtr0082660;FBtr0082661;FBtr0330025	Men	4	1	0.94029	0.814204	0.536454	0.506357	0.392018	0.253067	0.136112	0	0.0771207	0.0606617	0.095444	0.0958096	0.246438
FBtr0082662	mus308	2	0	0.11998	0.0380639	0.910906	1	0.972426	0.966657	0.97178	0.0363321	0.0240314	0.0352491	0.00974263	0.0973569	0.239028
FBtr0082665	Su(fu)	6	0.0276052	0.0587337	0	0.950256	0.93738	1	0.997466	0.969209	0.954838	0.949116	0.939528	0.894246	0.898189	0.852795
FBtr0082690	Spc25	6	0.116479	0.123772	0	0.157116	0.168151	0.988838	0.991053	0.945196	1	0.860065	0.829127	0.823618	0.859751	0.145445
FBtr0082691	Cyp304a1	4	0.122248	0.175203	0.075738	0.191903	0.147409	0.195134	0.150765	0.170314	0	0.166689	0.134896	0.750734	0.885175	1
FBtr0082704	ry	5	0.0393437	0.199024	0	0.101804	0.123921	0.0793787	0.0489806	0.11624	0.119642	0.077637	0.86967	1	0.962811	0.978309
FBtr0082736;FBtr0301657	Su(var)3-7	6	0.184761	0	0.847203	1	0.960035	0.866291	0.935375	0.967481	0.935787	0.892165	0.856237	0.854247	0.846288	0.807395
FBtr0082759	yellow-e3	2	0.0494177	0.114488	0.0214952	0.0226672	0	0.032832	0.757603	0.742621	0.791682	0.855935	0.991987	1	0.911424	0.930458
FBtr0114375;FBtr0082793;FBtr0114376;FBtr0114374	yrt	6	0.00667749	0	0.705308	0.921011	0.927747	0.97161	0.970554	1	0.921343	0.963552	0.97273	0.931391	0.868633	0.831084
FBtr0301488;FBtr0082815;FBtr0082814;FBtr0082813;FBtr0082812;FBtr0082811;FBtr0082810;FBtr0082809;FBtr0082808	lkb1	1	1	0.878002	0.852385	0.799481	0.00756158	0.0690667	0.0312513	0.0671672	0.00964936	0.0530847	0.00986026	0	0.0380592	0.104672
FBtr0082829	CG9288	2	0.0117275	0.0155603	0.0871792	0	0.0358995	0.0246682	0.0729885	0.0352805	0.885061	0.750766	0.909192	0.955695	1	0.803069
FBtr0082849	CG9588	6	0.000462286	0.0350155	0	0.840601	0.88296	0.833215	0.849051	0.880455	0.871287	0.878352	0.931439	0.92224	1	0.827001
FBtr0334297;FBtr0082870	CG9922	6	0.0611778	0	0.0591421	0.728445	0.833803	0.842785	0.820049	0.812493	0.886193	0.895226	0.918169	0.872882	1	0.810948
FBtr0346348;FBtr0309995;FBtr0082925	RpII15	6	0	0.0428003	0.0317817	0.897497	0.867501	0.904461	0.912317	0.941401	0.967214	0.904705	1	0.955206	0.939006	0.945693
FBtr0082943	CG31320	6	0	0.0914886	0.18167	0.922894	0.927779	1	0.930915	0.955643	0.946008	0.924177	0.870566	0.893823	0.833219	0.793275
FBtr0310002;FBtr0082946;FBtr0082945	su(Hw)	6	0	0.0245919	0.644149	0.826658	0.831082	0.833288	0.871416	0.87377	0.908863	0.928568	0.967512	0.99821	0.960681	1
FBtr0082998	CG33331	1	0.971429	0.945598	0.903354	0.0978687	0.0580587	0.0157929	0.0400413	0.0189022	0.640534	0.754792	1	0.900855	0.754971	0
FBtr0082999	CG33332	2	0.112135	0.124608	0.1287	0.9475	0.91088	0.79177	0.853444	1	0.0604088	0	0.0638767	0.0651405	0.0409122	0.0283958
FBtr0083003	CG3817	6	0.0133775	0.0059405	0	0.748403	0.734773	0.73406	0.770193	0.83985	0.818498	0.854642	0.944339	0.977978	0.929735	1
FBtr0083009	CG7265	6	0.0472898	0.0543423	0	0.904037	0.893819	0.946793	0.97049	0.985799	1	0.986073	0.967102	0.96937	0.969748	0.943044
FBtr0083048	CG4203	6	0	0.0882728	0.965046	0.851722	0.868379	0.92413	0.914557	0.969615	0.991693	0.880925	0.923452	0.973947	0.980312	1
FBtr0083052	Caf1	2	0.0295552	0.0339346	0.039624	0.0336466	0.0173954	0.0229188	0	0.00349276	0.987447	0.723938	0.84703	0.948116	1	0.87926
FBtr0083066	CG4338	2	0.229054	0.106389	0.187273	0.101799	0.0527497	0.852875	0	0.083541	0.962328	0.816295	0.873925	0.920566	0.94285	1
FBtr0345212;FBtr0339530;FBtr0333920;FBtr0083079;FBtr0083078;FBtr0083080	Tm2	5	0	0.0478831	0.0632297	0.806082	0.842948	0.527878	0.224765	0.127288	0.241678	0.296852	0.532128	0.729972	0.853137	1
FBtr0334695;FBtr0083082;FBtr0330039	ear	6	0.00149474	0	0.739232	0.967015	0.983844	0.961928	0.951866	1	0.968859	0.910407	0.981391	0.978266	0.988349	0.983675
FBtr0083083;FBtr0334588	ea	1	0.976461	1	0.950714	0.0476259	0.0675435	0.0956979	0.0176482	0.02293	0.0526612	0.0357746	0.106475	0.110086	0	0.0156295
FBtr0083087	CG31301	6	0	0.0103325	0.849516	0.882152	0.868306	0.90499	0.917463	0.926969	0.943739	0.91025	1	0.98158	0.969184	0.95974
FBtr0334590;FBtr0083119	CG6218	4	0.000822917	0.0248492	0.0439526	0	0.0356228	0.00595391	0.0373786	0.0342295	0.4034	0.535491	0.802105	0.861399	0.775707	1
FBtr0083139	CG6654	6	0.100233	0.00307048	0	0.0964314	0.0631446	0.0576422	0.815874	0.821763	0.787693	1	0.740702	0.965658	0.804075	0.968175
FBtr0083143	Act88F	4	0.0186804	0.0515698	0.0845209	1	0.725461	0.0642407	0.0293161	0.0561679	0.0584807	0.0216057	0.0486929	0	0.0224568	0.068623
FBtr0302549;FBtr0083212	CG5516	6	0	0.0480745	0.0591428	0.0162241	0.71142	0.782096	0.687079	0.88296	0.9	0.862577	0.836982	1	0.938509	0.894101
FBtr0083213	Rbf2	6	0	0.130297	0.0971087	0.672315	0.853307	0.860208	0.883208	1	0.991767	0.912214	0.986318	0.844831	0.880552	0.862118
FBtr0083216;FBtr0306244;FBtr0083215;FBtr0335424;FBtr0335423;FBtr0100595	srp	2	0.118221	0.102237	0.0452599	0.173062	0.152766	0.0720402	0.125254	0.130493	0.901707	0.971486	1	0.684959	0.825233	0
FBtr0303261;FBtr0303260;FBtr0083218	GATAe	4	0.02808	0.070548	0.0404358	0.0229044	0.0860684	0	0.0338767	0.10433	0.0388701	0.0258572	0.907996	0.899044	0.899196	1
FBtr0336487;FBtr0083237	CG10407	1	1	0.845053	0.596117	0.414381	0.237081	0.0117471	0.0683069	0	0.0259728	0.0412128	0.0173549	0.0319738	0.0212325	0.0136874
FBtr0301716;FBtr0083240	CG4287	2	0.0362888	0.124582	0.0597843	0.957914	0.850985	0.875455	1	0.0604351	0	0.0550234	0.105135	0.0360728	0.00289108	0.0775106
FBtr0344381;FBtr0083248;FBtr0083247;FBtr0083246;FBtr0083245	glob1	3	0.0211849	0	0.0469821	0.887304	0.847015	0.867482	0.879031	0.830845	0.860244	0.818692	0.936728	1	0.922452	0.951051
FBtr0344473;FBtr0083255	sra	2	0.00161399	0.0518815	0.0274794	0.826876	0.825031	0.841875	1	0.869105	0.0313493	0	0.00286961	0.0644546	0.0707223	0.0494538
FBtr0083278	CG6126	4	1	0.887402	0.592359	0.05281	0.0343868	0.014181	0.046717	0	0.56257	0.52653	0.699942	0.672078	0.76871	0.87562
FBtr0083291	CG14883	1	0.907515	0.852669	0.896937	0.0289147	0.0153434	0	0.0828677	0.0665433	0.0743876	0.0662852	0.804741	0.926386	0.917344	1
FBtr0110910;FBtr0083295	Dhfr	3	0.0150851	0	0.570725	0.923504	0.961848	1	0.986323	0.916085	0.965552	0.79949	0.680206	0.755874	0.729333	0.730523
FBtr0083303	CG14903	6	0	0.00762855	0.0695231	0.0383124	0.897161	0.914221	0.912146	0.890519	1	0.944728	0.948453	0.936869	0.988711	0.970446
FBtr0305003;FBtr0083312;FBtr0330047	Pak3	6	0	0.110109	0.0511815	0.694947	0.737495	0.771903	0.79919	0.884079	0.943167	0.993479	0.964316	0.960453	1	0.997058
FBtr0337016;FBtr0083314	CG14894	6	0.0183194	0	0.110201	0.945869	0.906166	0.964108	0.984194	1	0.96086	0.887123	0.908457	0.796876	0.932107	0.820392
FBtr0083348;FBtr0083352;FBtr0083350;FBtr0083349;FBtr0083351;FBtr0083347	Ubx	5	0.0613884	0.10692	0.0166666	0.0438368	0	0.0285573	0.0247739	0.038985	0.847087	0.752869	0.977815	0.973244	0.9922	1
FBtr0083356	CG10324	2	0	0.105068	0.0584343	0.819426	0.775835	0.806793	0.900648	0.834168	0.0468888	0.0401191	0.03598	0.682509	0.871519	1
FBtr0337060;FBtr0083371	Irc	4	1	0.936399	0.877883	0.0785111	0.084985	0.0526122	0.123376	0	0.120403	0.768487	0.853327	0.928587	0.855533	0.759676
FBtr0306337;FBtr0300485;FBtr0083387;FBtr0083388	abd-A	5	0.0500595	0.0695272	0.0376909	0	0.0865609	0.0660549	0.0690268	0.130814	0.795455	0.952107	0.965924	1	0.959364	0.930233
FBtr0083391	CG5220	6	0.115664	0.0873773	0	0.996714	0.950959	0.947234	1	0.931571	0.909063	0.911188	0.92023	0.999789	0.990563	0.964944
FBtr0083408	Det	6	0.785996	0.827755	0.819639	0.962454	0.952724	0.907681	0.936652	0.965959	1	0.876111	0.803782	0.709191	0.768071	0
FBtr0083415	TwdlW	4	0.0144916	0.0389659	0.0105057	0.0156417	0.0822721	0	0.0455708	0.0443939	0.0799141	0.0500454	0.0227303	0.0403122	0.761133	1
FBtr0083428	CG3995	6	0	0.134154	0.0491456	0.916829	0.936232	0.850421	0.822909	0.911993	0.931247	0.907831	0.951509	0.966736	0.892885	1
FBtr0083442	CG5873	4	0.0141305	0.00209704	0	0.0562548	0.0631333	0.0302314	0.0152636	0.0408838	0.0357663	0.0315279	0.682742	0.858085	0.74395	1
FBtr0083456	SF1	6	0	0.561662	0.767985	0.829733	0.857237	0.889012	0.925531	0.951561	0.98303	0.940864	0.989752	0.988485	1	0.988977
FBtr0083478;FBtr0331348	ald	2	0	0.103833	1	0.76628	0.63714	0.822002	0.702353	0.837502	0.0303565	0.101614	0.0622378	0.0864227	0.0196482	0.0711531
FBtr0083479	CG7655	3	0	0.0704967	0.735597	0.610306	0.600819	0.581768	0.782398	0.739429	0.758174	0.837703	0.945537	0.948801	0.883115	1
FBtr0347218;FBtr0083504	l(3)07882	6	0.0275	0	0.482749	0.682406	0.686382	0.699604	0.772979	0.796802	0.845996	0.871865	0.942146	0.989946	0.930358	1
FBtr0083529	CG7379	2	0.0225017	0.107663	0.0380003	0.0218008	0.0498492	0	0.0708567	0.066428	0.0355125	0.795853	0.889968	0.983396	0.81478	1
FBtr0083541	CG14317	2	0	0.0139496	0.107923	0.97149	1	0.668326	0.0191326	0.0222327	0.00981594	0.0715114	0.0156129	0.00319133	0.0447594	0.0111558
FBtr0083575	Dlc90F	6	0	0.713835	0.762199	0.930646	1	0.944235	0.892567	0.906906	0.972039	0.956098	0.999294	0.927206	0.928892	0.945469
FBtr0083580	CG14309	4	1	0.8217	0.648806	0.496355	0.419171	0.388122	0.351635	0.403204	0.318341	0.304143	0.28758	0.242613	0.186367	0
FBtr0344551;FBtr0083583;FBtr0083581;FBtr0344550;FBtr0083582	CG7675	4	0.423582	0.208904	0.0904119	0.167866	0.233362	0.153988	0.0921589	0	0.295223	0.415979	0.702749	0.873568	0.773326	1
FBtr0330312;FBtr0290023;FBtr0083592;FBtr0083591;FBtr0083590;FBtr0083589;FBtr0330313	PKD	4	0.0343283	0.0424089	0.10087	0.0994091	0.108438	0.12601	0.0931879	0.0543199	0	0.0530879	0.0506591	0.916881	0.834762	1
FBtr0334314;FBtr0334313;FBtr0083596;FBtr0083595	l(3)05822	1	0.0866681	0.933542	1	0.865738	0.83659	0.919235	0.101489	0.147218	0	0.0508286	0.145651	0.0829408	0.138713	0.136135
FBtr0336472;FBtr0083619	cdm	6	0.0447369	0	0.789831	0.769555	0.859336	0.858339	0.844494	1	0.903647	0.899977	0.882952	0.70624	0.918686	0.807206
FBtr0344646;FBtr0083623	CG7218	1	0.946397	0.996027	1	0.925516	0.0278671	0.0149075	0.0500001	0.0383322	0.0088997	0.869741	0.836833	0.0330116	0.0108593	0
FBtr0333830;FBtr0083630	CG7685	2	1	0.910212	0.984365	0.840367	0.653918	0.00787971	0	0.0367421	0.729483	0.675858	0.703441	0.760992	0.722392	0.67185
FBtr0301432;FBtr0333831;FBtr0083653	CG31122	2	0	0.0750139	0.0201155	0.0825164	0.104624	0.00968982	0.741986	0.740448	0.819379	0.776019	0.850462	0.96512	0.917442	1
FBtr0083665;FBtr0083664	CG7702	5	0.0300125	0.0156301	0.0556096	0.0110965	0.0017131	0	0.0253953	0.0456415	0.561065	0.677658	0.789187	0.865183	0.865428	1
FBtr0083674;FBtr0331352	gwl	1	1	0.713984	0.713471	0.62476	0.578623	0.471849	0.522996	0.55307	0.579905	0.38904	0.052841	0	0.0760184	0.083209
FBtr0083724	CG14291	5	0.0419079	0	0.0393601	0.0360594	0.00765675	0.0209054	0.0191769	0.518187	0.606408	0.679135	0.869779	0.948728	0.900622	1
FBtr0304658;FBtr0083740;FBtr0083739	Dl	2	0.507335	0.736417	0.800922	0.955367	0.980972	0.991359	1	0.990904	0.816298	0.722933	0.598598	0.400945	0.398784	0
FBtr0083771	Ino80	6	0	0.0508839	0.908593	0.879115	0.866459	0.883303	0.919149	0.907323	0.914951	0.86044	0.950372	0.954953	0.961243	1
FBtr0083815	CG11447	2	1	0.958903	0.947622	0.73547	0.907903	0	0.042857	0.0107405	0.769084	0.757351	0.826578	0.819325	0.828172	0.855888
FBtr0083831	CG4936	6	0	0.0474828	0.0113434	0.833604	0.791162	0.746617	0.904784	0.847868	0.905382	0.828927	0.923589	1	0.887444	0.932077
FBtr0083847;FBtr0083848;FBtr0335243	mira	2	0	0.0212356	0.0638825	0.892696	1	0.964645	0.981693	0.920912	0.712788	0.74217	0.0225193	0.0231537	0.0425359	0.061019
FBtr0083899;FBtr0113252	CG4360	2	0.0742002	0.0627641	0.0487497	0.124515	0.121337	0.131437	0.0855897	0	0.120178	0.739259	0.857918	0.900364	1	0.917251
FBtr0083905;FBtr0345213;FBtr0083908;FBtr0083907;FBtr0083906;FBtr0083904	CG5191	5	0.874376	0.81079	0.797424	0.844634	0	0.112233	0.778497	0.776282	0.704425	0.7343	0.805051	0.868077	0.801365	1
FBtr0083992	CG17272	5	0.0796938	0.109095	0.0886912	0.08647	0	0.0453371	5.10666e-05	0.135725	0.070681	0.665998	0.850984	0.979977	0.957855	1
FBtr0084009	rtet	2	0.953049	1	0.909599	0.993326	0.954049	0.910681	0.928387	0.840877	0.0259354	0.000266023	0	0.0654687	0.754368	0.89245
FBtr0084079;FBtr0084069;FBtr0084077;FBtr0084071;FBtr0307760;FBtr0084060;FBtr0084080;FBtr0114359;FBtr0084083;FBtr0114360;FBtr0307759;FBtr0084063;FBtr0084062;FBtr0084068	mod(mdg4)	6	0.043026	0	0.588133	0.720843	0.624636	0.690344	0.825723	0.839194	0.829297	0.911549	1	0.955713	0.874847	0.987536
FBtr0084081	mod(mdg4)	2	0.106543	0.179582	0.125136	0.134592	0.134325	0.107792	0.154445	0.0758888	0	1	0.924068	0.928187	0.884018	0.974343
FBtr0084082	mod(mdg4)	2	0.0722466	0.140899	0.109585	0.967469	0.983334	0.0548998	0	0.0174945	0.100314	1	0.854717	0.900448	0.891198	0.954596
FBtr0343806;FBtr0084095;FBtr0343807;FBtr0343805	CG16791	5	0.0858947	0.0444553	0.0248965	0.0993249	0.0895255	0.0932354	0	0.035329	0.056891	0.877967	0.96144	1	0.976904	0.985828
FBtr0084108	CG3353	3	0	0.00271307	0.0562495	0.83503	0.899742	0.914221	1	0.892447	0.89054	0.8376	0.856316	0.77297	0.86307	0.727275
FBtr0334664;FBtr0084112;FBtr0301211;FBtr0334663	CG7956	6	0.0668405	0.0853227	0	1	0.976333	0.945037	0.978828	0.950837	0.920206	0.91678	0.926789	0.91806	0.916886	0.851291
FBtr0290232;FBtr0290231;FBtr0290230;FBtr0084121	InR	5	0	0.000139374	0.752689	0.0585954	0.112171	0.000232042	0.0717926	0.721042	0.89553	0.893781	0.902707	0.938528	1	0.952851
FBtr0346732;FBtr0084127	CG31233	4	0.0297666	0.0417529	0.101263	0.00206588	0.0802755	0.0618199	0	0.068024	0.0698859	0.547434	0.783824	0.597117	0.659618	1
FBtr0084128	CG31198	4	0.0719235	0.0660418	0	0.0579198	0.0268006	0.0306984	0.0871085	0.0510952	0.0492619	0.663342	0.713491	0.74097	0.841395	1
FBtr0334312;FBtr0084165;FBtr0084164	tsl	4	1	0.941017	0.838665	0.866426	0.814627	0.0461174	0.107823	0.040356	0	0.0590392	0.105582	0.0442972	0.0289128	0.0290432
FBtr0084166	RpI12	2	0.0373055	0	0.0277808	0.0400768	0.0457986	0.0721718	0.5578	0.631872	0.767288	0.785858	0.866063	0.938452	0.891325	1
FBtr0346345;FBtr0084175;FBtr0084174	pit	6	0.306809	0	0.386246	0.658579	0.65565	0.726476	0.759312	0.760058	0.804763	0.848876	0.913615	0.961727	0.893688	1
FBtr0301402;FBtr0301401;FBtr0084177;FBtr0084178;FBtr0100514	how	5	0.0985507	0.129293	0	0.149119	0.00915177	0.126504	0.11119	0.196688	0.828818	0.844079	0.858832	0.971266	0.953919	1
FBtr0305320;FBtr0084236	CG5380	2	0.0881607	0.086847	0.0669204	0.152735	0.144462	0	0.0890385	0.112981	0.0747418	0.918502	0.947964	1	0.995616	0.119047
FBtr0084254	CG7054	3	0	0.0210863	0.124554	0.980533	0.930494	0.983415	1	0.982301	0.978147	0.94358	0.956376	0.902408	0.952528	0.856503
FBtr0084277	CG31156	6	0.0314808	0.0365126	0.0417339	0.951677	0.929968	0.941961	0.939753	0.947223	0.966158	1	0.0260996	0.0368366	0.0264279	0
FBtr0084288	CG33099	3	0.0301952	0.00294342	0.0551511	0.00282327	0	0.0146166	0.0227888	0.891432	0.860706	0.878912	1	0.987586	0.994561	0.949883
FBtr0084309	HP1c	2	0	0.00258648	0.0150244	0.0449422	0.0020837	0.00356645	0.0402632	0.924835	0.966236	0.902818	0.95246	1	0.957849	0.969772
FBtr0084317	CG4721	4	1	0.840998	0.821463	0.741201	0.642338	0.0529425	0.0355852	0.0816983	0.019063	0.0612404	0.045793	0	0.732774	0.825373
FBtr0334605;FBtr0084336	Gclm	3	0.0851701	0.0872183	0	0.900819	0.878105	0.895089	1	0.929058	0.935847	0.90218	0.96622	0.965452	0.905177	0.986829
FBtr0337027;FBtr0084351	CG17109	4	0.00787039	0.00733103	0.0625833	0.0475531	0.07077	0.0198301	0.00133963	0.0200457	0.0105424	0	0.249331	0.561727	0.448054	1
FBtr0084374;FBtr0084375	EloA	6	0.00301561	0	0.856714	0.93642	0.994643	1	0.929851	0.95403	0.953826	0.96843	0.901863	0.940529	0.984794	0.918279
FBtr0084387	wda	6	0.0622195	0.0240284	0.0856056	0	0.0637696	0.766378	0.799023	0.825118	0.854948	0.860158	0.881442	1	0.994883	0.958053
FBtr0305573;FBtr0305571;FBtr0084403;FBtr0084402;FBtr0337052;FBtr0305572	unk	6	0	0.0164138	1	0.886375	0.86786	0.91252	0.90482	0.909106	0.95203	0.921875	0.918433	0.908588	0.982063	0.941801
FBtr0084405	CG31457	2	0	0.106714	0.0850579	0.061197	0.0596685	0.0955321	0.128661	0.0872431	0.85646	1	0.953336	0.889562	0.900833	0.938582
FBtr0084406	CG31365	6	0.0419262	0.048014	0.0722993	0	0.0357028	0.786131	0.90808	0.883585	0.892624	0.940817	0.817052	0.965665	1	0.966196
FBtr0084440	SPE	4	1	0.882013	0.874702	0.0928504	0	0.111538	0.0649716	0.0770459	0.034779	0.0821024	0.117282	0.0941155	0.085795	0.216495
FBtr0084450	Hmgcr	4	0.123132	0.177424	0.129446	0	0.148063	0.15167	0.116859	0.13663	0.124954	0.171204	0.640976	0.695218	0.68074	1
FBtr0084455;FBtr0335002;FBtr0084456;FBtr0084457	Lsd-1	4	0.0679965	0.111909	0.0940178	0.00877824	0.0328354	0	0.0606917	0.0399023	0.0385148	0.0569548	0.861742	0.88474	1	0.940849
FBtr0084477;FBtr0084476;FBtr0334770	CG10254	1	1	0.450907	0.183126	0.145796	0.165878	0	0.0123362	0.0700185	0.078417	0.0616667	0.15337	0.0747901	0.208007	0.0988611
FBtr0084494	CG5854	6	0.199123	0.356874	0	0.724823	0.729871	0.782753	0.915216	0.889958	0.919923	0.914998	1	0.98735	0.944353	0.985646
FBtr0084496;FBtr0335244;FBtr0305040;FBtr0305039	AP-1sigma	6	0.926993	0.924342	0	0.0330939	0.899821	0.92491	0.945435	0.983292	0.877735	0.921533	0.900732	1	0.967794	0.917881
FBtr0301165;FBtr0084502;FBtr0084501	CG5902	3	0	0.571893	0.681879	0.866249	0.797513	0.874671	0.837675	0.885318	0.894318	0.929578	0.898107	0.97721	0.900986	1
FBtr0339250;FBtr0084508;FBtr0084507;FBtr0084506;FBtr0301418	KrT95D	5	0.0505665	0.0425181	0.107165	0.0595882	0.053582	0.0448396	0.0739895	0	0.0913935	0.0421267	1	0.925151	0.913712	0.970299
FBtr0112907;FBtr0084527	Pli	6	0.0484643	0	0.0429982	0.84463	0.854769	0.874779	0.856204	0.901796	0.991962	0.949652	0.98211	0.954939	1	0.906703
FBtr0321261;FBtr0084535	CG5986	2	0.0923144	0.0560797	0.0453148	0.0506469	0	0.0171341	0.106394	0.105657	0.691451	0.970929	1	0.94115	0.890566	0.88968
FBtr0084546	Tsc1	6	0	0.00325411	1	0.883188	0.843011	0.896793	0.944607	0.902082	0.803478	0.782991	0.798666	0.636425	0.934746	0.715803
FBtr0084552	Apc2	6	0	0.795113	0.950539	0.973936	0.978373	0.938084	0.982605	1	0.964798	0.925019	0.910187	0.832301	0.907772	0.810779
FBtr0084555	CG6204	2	0	0.0865596	0.0924303	0.0640011	0.921154	1	0.0252025	0.0456698	0.113401	0.0769285	0.0753467	0.17596	0.136799	0.0815859
FBtr0334869;FBtr0084598	Orct2	2	0.162072	0.199672	0.278027	0.182899	0	0.133827	0.224139	0.146888	1	0.947094	0.935148	0.862503	0.978227	0.954619
FBtr0334870;FBtr0084599	Orct	5	0.0260698	0.0352042	0.0719784	0	0.0667868	0.0138918	0.0326768	0.06464	0.51674	0.636059	0.869142	0.880432	0.818716	1
FBtr0084601	CG6356	4	0	0.0437518	0.201849	0.028478	0.0173951	0.0831578	0.0471537	0.0838676	0.0240783	0.0546685	0.837374	0.819254	0.926614	1
FBtr0309097;FBtr0309096;FBtr0309095;FBtr0084602;FBtr0299530	CG6364	6	0.707106	0	0.020665	0.945153	0.914709	0.873736	0.926738	0.933835	1	0.86985	0.966663	0.942988	0.942405	0.900336
FBtr0334601;FBtr0334603;FBtr0084631;FBtr0084630;FBtr0334602;FBtr0273283;FBtr0273282	CG5746	6	0	0.0324912	0.0751031	0.904071	0.924163	0.876563	0.827828	0.966906	0.954289	0.932925	1	0.989957	0.867643	0.906275
FBtr0084644	CG6607	6	0.126472	0	0.184746	0.788516	0.993376	1	0.899913	0.135247	0.0476465	0.936342	0.89602	0.880775	0.958797	0.949379
FBtr0084671	CG13625	2	0.0787202	0.100421	0.140334	0.150368	0.0586785	0.131703	0.0491676	0	0.158605	1	0.830276	0.960511	0.0200374	0.0610967
FBtr0084692	asp	2	0.874033	0.86147	1	0.944753	0.916799	0.940933	0.994998	0.976197	0.843355	0.667309	0.536848	0.648218	0.772489	0
FBtr0303480;FBtr0084711	CG31381	2	0	1	0.78142	0.00581706	0.049705	0.092487	0.710639	0.767949	0.810173	0.854174	0.9497	0.61777	0.812349	0.0786086
FBtr0084712	CG11069	5	0.225587	0.154513	0.235919	0.175073	0	0.133141	0.183118	0.210387	0.812702	0.978038	0.969763	0.960204	0.975883	1
FBtr0084724;FBtr0084723	CG31121	5	0.0905895	0.0346702	0.14181	0.0741253	0	0.0942142	0.0709118	0.076024	0.774253	0.853023	0.975722	0.977552	0.954355	1
FBtr0334578;FBtr0084728	CycB3	2	0.731649	0.668969	0.612866	0.930374	1	0.876997	0.903423	0.816698	0.602829	0.564801	0.019044	0.0197305	0	0.0123414
FBtr0084736	RabX4	5	0.107209	0.0294723	0.0733199	0.0207845	0.00413783	0.0280606	0.0093687	0.0377583	0	0.855133	0.835392	0.933642	0.930113	1
FBtr0084740	polybromo	6	0	0.0535499	0.765209	0.934767	0.944749	0.924058	0.913523	0.928185	0.956485	0.977881	1	0.95	0.908105	0.965576
FBtr0339255;FBtr0084743	CG5805	4	0.949371	0.943195	1	0	0.130664	0.135755	0.0260128	0.0988555	0.0357888	0.0385725	0.0891172	0.0421665	0.0508284	0.126945
FBtr0337012;FBtr0084749;FBtr0084750	Nmnat	5	0.796379	1	0.816404	0.661493	0.694641	0.727151	0.752906	0.519928	0.0143221	0	0.707396	0.803525	0.762257	0.652898
FBtr0084787;FBtr0301664	veli	3	0.0333343	0	0.0602344	0.825752	0.872381	0.948531	0.75296	0.829437	0.944272	1	0.894203	0.884347	0.885777	0.860315
FBtr0301613;FBtr0084799;FBtr0301612;FBtr0084800	ssh	2	0.0750504	0.0434948	0.950385	1	0.903951	0.93613	0.98525	0.896027	0.0427198	0.024333	0.0384191	0.104306	0	0.0588098
FBtr0339247;FBtr0084802	CG31108	2	0.0565241	0.133432	0.99094	0.748058	1	0.855644	0.787947	0.0851357	0.041141	0.100596	0.0569488	0.105413	0.0908492	0
FBtr0330289;FBtr0084803;FBtr0330288	dan	2	0	0.100138	0.0802812	0.899513	0.87634	1	0.887983	0.655104	0.0142313	0.0129719	0.0460768	0.0162245	0.0599008	0.0885949
FBtr0084933	CG4743	4	0.873106	0.870095	0.956332	0.0426367	0.0399933	0	0.0414716	0.0390725	0.0252342	0.773711	0.714227	0.84633	0.808863	1
FBtr0085035	TwdlD	4	0.626877	0.316646	0.0541836	0.0860328	0	0.0595961	0.0277036	0.00300611	0.013123	0.0788094	0.060431	0.515479	0.794141	1
FBtr0085057	TwdlB	4	0.070757	0.105169	0.015824	0	0.0912287	0.0719344	0.0755995	0.112533	0.115324	0.0454188	0.184631	0.0556066	0.846749	1
FBtr0344665;FBtr0336726;FBtr0085082	Tsp97E	2	1	0.946935	0.869291	0.759801	0.747038	0.714573	0.720256	0.652896	0.6223	0.547268	0.0394727	0.0578854	0	0.0430382
FBtr0085085;FBtr0085084	CG6330	5	0.0447899	0.115823	0.0948325	0.0316609	0	0.0419411	0.627895	0.734367	0.851879	0.733681	0.83707	0.828412	0.914273	1
FBtr0085088;FBtr0330167	Ets97D	2	0.0617833	0.0802682	0.206074	0.0494298	0.0252554	0	0.0675027	0.0966411	0.75111	0.736306	0.83524	0.848167	1	0.799454
FBtr0334309;FBtr0085094	BM-40-SPARC	4	0.0630406	0.0557797	0.106093	0.0382112	0	0.00961998	0.0277373	0.0379377	0.00420432	0.0432671	0.629194	0.73059	0.742432	1
FBtr0339262;FBtr0085106	CG5815	2	0.0964364	0.027247	0.0283867	0.0092267	0	0.0493824	0.0759412	0.0121119	0.0671545	0.947098	0.957261	1	0.863911	0.904054
FBtr0333327;FBtr0085123;FBtr0085122	CG18766	2	0.0499611	0.101819	0.118416	0.0496901	0.0120489	0	0.0483835	0.07807	0.877234	0.916894	0.975213	1	0.986893	0.978795
FBtr0085125;FBtr0339249;FBtr0085124;FBtr0339248;FBtr0085126	CG31064	5	0.0166791	0.060902	0.0751744	0.0844523	0	0.103167	0.0966451	0.0476724	0.0810956	0.953559	0.85215	1	0.941185	0.908604
FBtr0085131	CG6066	2	0.0295976	0.0385994	0.0568267	0	0.0884475	0.0679243	0.0303839	0.0110989	0.0132742	0.897523	0.878721	0.976602	0.934545	1
FBtr0085145;FBtr0085146;FBtr0085139;FBtr0114372;FBtr0085140;FBtr0112834;FBtr0085138;FBtr0085137	spz	1	0.990909	1	0.976824	0.84907	0.745314	0.0721888	0.0407461	0.11371	0.123723	0.0133637	0.0880129	0.0626339	0.0646417	0
FBtr0305975;FBtr0305974;FBtr0305973;FBtr0305972;FBtr0305971;FBtr0085174	mrt	5	0.0390501	0.0905268	0.0252991	0	0.00738336	0.0343414	0.0690149	0.00806664	0.0916908	0.886393	0.815463	0.900191	0.993156	1
FBtr0085194	RpS10a	2	0.928548	0.979357	0.970338	0.115431	0	0.140395	0.727499	0.737769	0.805898	0.903212	0.913934	1	0.832361	0.881731
FBtr0344131;FBtr0085196;FBtr0085195	Mlc1	4	0.440353	0.409585	0.57315	0.676289	0.849619	0.0350149	0.0133032	0	0.0370512	0.281819	0.446432	0.708555	0.916353	1
FBtr0304671;FBtr0085211	Klp98A	2	0.883431	0.984289	1	0.924963	0.7621	0.0272354	0	0.99624	0.800481	0.898673	0.858167	0.916212	0.744156	0.968097
FBtr0085245	Sce	6	0	0.00583968	0.0645754	0.892166	0.824891	0.909162	0.868367	0.887671	0.884724	0.871349	0.861685	1	0.850978	0.941018
FBtr0085272	CG5003	6	0	0.0386564	0.0304415	0.974798	0.984259	0.877023	0.865636	0.835431	0.914989	0.893694	0.884552	0.828939	0.859764	1
FBtr0085286;FBtr0300346;FBtr0085287	Moca-cyp	6	0	0.0169845	0.844377	0.886751	0.880712	0.918737	0.905518	0.941892	0.91515	0.905006	0.977709	0.998228	0.950809	1
FBtr0085297	Gfat2	3	0.0231097	0	0.0186074	0.686355	0.753888	0.764948	0.731766	0.822728	0.815847	0.86495	0.987628	0.931327	0.991029	1
FBtr0336788;FBtr0085310	htt	6	0.044079	0	0.0404487	0.932929	0.932061	0.915778	1	0.972938	0.842486	0.932475	0.988515	0.976338	0.908057	0.941128
FBtr0085319	CG10011	2	0.069074	0.0644593	0	0.123689	0.0752531	0.0245941	0.0491516	0.0221613	0.871303	0.959658	0.873269	0.854676	0.769719	1
FBtr0345227;FBtr0300259;FBtr0085321;FBtr0346765;FBtr0330333	fkh	3	0.0147449	0	0.0138558	0.740159	0.538678	0.328356	0.867657	1	0.993903	0.694234	0.805876	0.833414	0.763484	0.640645
FBtr0085342	CG1951	6	0	0.0189497	0.981776	1	0.976934	0.964746	0.997273	0.948139	0.938135	0.98254	0.915892	0.930695	0.947063	0.944433
FBtr0335405;FBtr0085380;FBtr0085375;FBtr0085377;FBtr0301651;FBtr0301650	Vha100-1	2	0.0762069	0.13584	0	0.103096	0.0820757	0.0786413	0.0706729	1	0.946474	0.946117	0.822527	0.824617	0.782317	0.0997636
FBtr0085382;FBtr0335406;FBtr0085383	CG14516	1	1	0.91466	0.727022	0.541991	0.502022	0.434271	0.36132	0.306852	0.232562	0.228831	0.153714	0.09844	0.0936522	0
FBtr0345203;FBtr0334868;FBtr0085400;FBtr0085399;FBtr0085398	SP1029	1	1	0.869789	0.725491	0.50209	0.457534	0.413016	0.378293	0.235232	0.170342	0	0.290742	0.324777	0.0722717	0.225832
FBtr0085409	Slbp	6	0	0.0483669	0.0114263	0.926813	0.839663	0.923171	0.981265	0.990808	1	0.913508	0.84169	0.9174	0.911949	0.732147
FBtr0335407;FBtr0085411	CG11882	6	0.0385676	0	0.101195	0.986333	0.954834	0.942005	0.957108	0.929575	0.872753	0.952907	1	0.988023	0.982676	0.816548
FBtr0085413	CG14512	6	0	0.0841389	0.0455921	0.921923	0.919936	0.766794	0.65868	0.815547	0.822229	0.861923	0.854118	0.884125	0.826952	1
FBtr0085414	dgt6	6	0.864664	0.882269	0.817893	1	0.969561	0.969927	0.985183	0.920203	0.871266	0.877013	0.77052	0.648228	0.776659	0
FBtr0085422;FBtr0085423;FBtr0303148;FBtr0085424;FBtr0303454	Ptp99A	3	0.0332849	0	0.0298532	0.800981	0.831272	0.770093	0.780237	0.886915	0.847887	0.869617	0.925472	0.938018	0.811098	1
FBtr0303455;FBtr0085425	CG2006	2	0.109914	0.0363335	0	0.0986997	0.0835032	0.0744955	0.0293632	0.869752	0.689868	1	0.783365	0.645593	0.102599	0.902681
FBtr0085509	Cog7	6	0.0480541	0.0218846	0	0.816815	0.835278	0.891613	0.963552	0.865959	1	0.849012	0.885373	0.954487	0.968659	0.863325
FBtr0335006;FBtr0085527;FBtr0339942	dgt1	6	0.0362731	0	0.91304	0.763477	0.722246	0.826031	0.758922	0.959458	0.862311	0.858182	0.933288	0.989217	0.937503	1
FBtr0344976;FBtr0085534	ncd	2	0.881962	0.798633	1	0.897987	0.884172	0.968804	0.951278	0.946964	0.970042	0.831507	0.262621	0.162413	0.475844	0
FBtr0085537	CG7837	2	0	0.0681038	0.0937651	0.951795	0.897256	0.990601	0.914526	1	0.0684926	0.0602702	0.0314637	0.052496	0.13796	0.0297698
FBtr0085545	CG7896	4	0.0462391	0.0413642	0.0727134	0.0328119	0.0729449	0.0063721	0.0578278	0.00898245	0	0.00390726	0.757789	0.83693	0.707367	1
FBtr0085549;FBtr0085548;FBtr0085547	CG11504	6	0.0105903	0.0368275	0	0.0494439	0.995236	0.6923	0.904837	0.974682	1	0.922021	0.92479	0.932175	0.857986	0.932794
FBtr0346862;FBtr0085557	Sry-alpha	1	0.0372805	0.0608745	0.0970167	1	0.946605	0.0232763	0	0.0580339	0.0412045	0.0569302	0.0605126	0.037567	0.0257013	0.0359239
FBtr0085558	Sry-delta	6	0.0581778	0.0133484	0	0.7897	0.782969	0.735795	0.8164	0.876945	0.846065	0.788225	0.856217	1	0.917373	0.938744
FBtr0085571	CG9743	4	0.0516879	0.0268239	0.0683888	0.0444932	0.00669796	0	0.0528916	0.0366648	0.00394282	0.480478	0.815303	0.822703	0.838962	1
FBtr0346162;FBtr0085573	CG9747	4	0.546855	0.445956	0.318342	0	0.012683	0.0208598	0.0422513	0.103164	0.0290224	0.229734	0.401004	0.464237	0.615597	1
FBtr0085579;FBtr0110834	CG31030	5	0.137434	0.0938895	0.0982729	0.0487876	0	0.139697	0.105234	0.100129	0.120063	0.781187	0.827057	0.890094	0.83453	1
FBtr0085590;FBtr0085589	spn-A	2	0.0657474	0.0916849	0	0.945958	0.877155	0.923582	0.996955	1	0.89806	0.0754497	0.0781429	0.117133	0.11042	0.101544
FBtr0085608;FBtr0334707	CG7903	6	0	0.470807	0.63313	0.675408	0.786268	0.750885	0.701445	0.75676	0.831555	0.814299	0.940816	1	0.890987	0.976288
FBtr0085650	PH4alphaEFB	5	0.0083765	0.00558831	0.0172352	0.033072	0	0.0590251	0.46695	0.687041	0.729743	0.755977	0.861656	0.930846	0.899034	1
FBtr0085651	spdo	2	0.0553695	0.0939619	0	0.0357396	0.0969735	0.0897203	0.0960729	0.990074	1	0.900073	0.778175	0.830881	0.822639	0.0223566
FBtr0085653	PH4alphaSG2	5	0	0.0746066	0.0691511	0.0450855	0.0635379	0.0851831	0.0551209	0.0135911	0.0937953	0.0954035	0.742158	0.810924	0.94917	1
FBtr0331358;FBtr0085691	CG2224	2	0.0584991	0.118081	0.0848212	0.911352	0.888314	0.984581	0.959313	1	0	0.143087	0.0976157	0.0793374	0.137663	0.17416
FBtr0085754	bnk	1	0.0961149	0.279667	1	0.995211	0.956061	0.0561135	0.0684911	0.0934417	0.0584267	0.0657231	0.116706	0.000865746	0.0745197	0
FBtr0085755	CG1544	5	0.0274633	0.0926173	0.0372966	0.00716905	0.0204885	0.0613711	0.0235604	0	0.0191161	0.7483	0.79353	0.839436	0.847057	1
FBtr0085757	CG1542	6	0	0.0250908	0.535236	0.76348	0.756314	0.81062	0.799091	0.840306	0.861331	0.885678	0.964588	0.990202	0.92046	1
FBtr0085813	CG31002	3	0	0.0629445	0.108315	0.052494	0.250728	0.334839	0.439382	0.711913	0.796643	0.890095	0.989966	1	0.955494	0.92048
FBtr0337032;FBtr0085820;FBtr0337031	pasha	6	0.00219075	0	0.943137	1	0.974374	0.926186	0.969011	0.982007	0.991287	0.919352	0.972539	0.95781	0.973934	0.959784
FBtr0085824;FBtr0085823	CG1815	6	0	0.0584414	0.843466	0.98141	0.969517	0.945033	0.981733	1	0.927129	0.952617	0.96932	0.941306	0.90603	0.892889
FBtr0303227;FBtr0085829;FBtr0085827;FBtr0085825	ttk	2	0.024631	0.0229288	0.0595455	0.0117772	0	0.0240327	0.0543641	0.0171292	0.734285	0.893023	0.971147	1	0.94382	0.892493
FBtr0303228;FBtr0085830;FBtr0085828;FBtr0085826	ttk	3	0	0.0174178	0.0144495	0.340817	0.349969	0.388216	0.486875	0.497914	0.752421	0.855646	0.997944	1	0.930057	0.978987
FBtr0085831	CG11563	6	0.0298565	0	0.057099	0.659172	0.646728	0.630604	0.729467	0.730022	0.839252	0.859289	0.989599	0.9908	0.912605	1
FBtr0085839;FBtr0085841;FBtr0085840	CG1910	6	0.285214	0.0622695	0	0.47252	0.599719	0.655262	0.743618	0.795672	0.911965	0.85309	0.995973	0.943347	1	0.948851
FBtr0085860	Smvt	3	0.0117251	0.0356659	0.00979023	0.0388061	0	0.00840194	0.771724	1	0.919605	0.95095	0.784018	0.690077	0.778256	0.628808
FBtr0085871;FBtr0085870	CG2003	4	1	0.734438	0.0710816	0.0846177	0.0601397	0.114093	0.0789811	0.0790688	0.0374351	0.0833324	0.0353724	0	0.0715858	0.0686754
FBtr0085876;FBtr0085875	Map205	6	0	0.893276	0.955948	0.960082	0.965846	0.963958	0.989178	0.984742	1	0.892256	0.939944	0.840995	0.98943	0.837352
FBtr0085906	tsh	5	0.0278144	0.179428	0.120595	0.121099	0	0.0549325	0.0924879	0.0308329	0.849543	0.832376	1	0.766744	0.790092	0.0835208
FBtr0344022;FBtr0085942;FBtr0085941	CycK	6	0	0.939392	1	0.981918	0.904044	0.983954	0.968048	0.970716	0.974695	0.910035	0.99707	0.987721	0.905165	0.961337
FBtr0306235;FBtr0085956;FBtr0085957;FBtr0306236;FBtr0085958	CG17018	1	1	0.511231	0.519193	0.0401376	0.0553179	0.0730628	0.0724	0.0488492	0	0.0389916	0.0389678	0.0521949	0.0767551	0.0306889
FBtr0307501;FBtr0307500;FBtr0086003	Ptr	3	0.0477311	0.0637508	0	0.918676	1	0.96186	0.821456	0.797967	0.701034	0.507859	0.414708	0.332352	0.535548	0.739228
FBtr0086071	CG17508	2	1	0.925668	0.987055	0.910148	0.868231	0.772222	0.860846	0.0305205	0.0456694	0	0.782442	0.770256	0.758423	0.927273
FBtr0086083;FBtr0335258;FBtr0086082	d4	6	0	0.0689839	0.869961	0.846439	0.820756	0.824577	0.857265	0.849048	0.935216	0.922094	0.987099	1	0.908982	0.990817
FBtr0086092;FBtr0086091	CG10417	6	0.0590145	0	0.189983	0.759454	0.78808	0.846521	0.844984	0.904724	0.95842	0.904723	0.949923	0.969313	1	0.948928
FBtr0086094	CG10465	2	0.0260056	0.00741544	0	0.0234109	0.0721707	0.0761711	0.0874775	0.0656592	0.768098	0.859842	0.898663	1	0.920372	0.778855
FBtr0336663;FBtr0086110	sced	1	0.897191	0.98164	1	0.0447005	0.0332535	0.0149421	0.0422157	0.11134	0.0948378	0.0919246	0.0715098	0	0.0715744	0.050885
FBtr0086112;FBtr0086111;FBtr0086113;FBtr0330252	Adf1	2	0.0252788	0.0689999	0	0.0450869	0.0371292	0.0169253	0.653061	0.852549	0.860083	0.853966	0.930536	0.976289	0.902819	1
FBtr0303225;FBtr0303226;FBtr0086170	CG17002	6	0	0.0529429	0.877898	0.923142	0.89786	1	0.927691	0.940276	0.954472	0.899875	0.895948	0.975735	0.879333	0.931684
FBtr0086173;FBtr0086172;FBtr0086171	Tsp42Ea	4	0.0400024	0.0516708	0.084366	0.0537628	0.0901558	0.0348691	0.0112223	0	0.088055	0.00632318	0.689794	0.802775	0.512316	1
FBtr0345536;FBtr0086181	Tsp42Ed	4	0.0660979	0.0124712	0.0484563	0.0791223	0	0.0295682	0.0688389	0.0372988	0.0660826	0.0633718	0.0672885	0.746038	0.780549	1
FBtr0345802;FBtr0345011;FBtr0086185	Cyp6u1	2	0.843447	0.999256	1	0.928812	0.947707	0.849885	0.867455	0.963789	0.915692	0.955178	0.0288044	0	0.833233	0.861235
FBtr0086231	CG11110	3	0	0.107847	0.110728	0.922081	1	0.939069	0.86499	0.805895	0.890258	0.937609	0.838088	0.857626	0.934287	0.934331
FBtr0345353;FBtr0342718;FBtr0086236;FBtr0345354	CG30152	3	0.0450236	0.0831337	0	0.980509	0.954606	0.981353	1	0.995595	0.998384	0.977022	0.95196	0.96689	0.773562	0.175661
FBtr0086254;FBtr0342722	CG11180	6	0.0378858	0	0.0214794	0.837017	0.876756	0.819548	0.831881	0.861006	0.84955	0.91133	1	0.956168	0.909085	0.960032
FBtr0086268	CG13427	6	0.067728	0.0623162	0	0.804809	0.90407	0.920704	0.93264	0.830719	0.787825	0.786316	0.815232	0.790148	1	0.7772
FBtr0086285;FBtr0086284;FBtr0345355;FBtr0086283	CG8929	6	0.0662663	0	0.440246	0.779505	0.831248	0.851328	0.881074	0.911113	0.919201	0.936891	0.960217	1	0.938908	0.970993
FBtr0086302	CG16868	2	0	0.617102	1	0.8734	0.842138	0.832669	0.791789	0.873862	0.0925463	0.13105	0.101672	0.549845	0.0709085	0.145531
FBtr0086305	CG10444	1	1	0.151914	0.096865	0.126063	0.124344	0	0.109516	0.108261	0.1122	0.123289	0.154127	0.136428	0.140846	0.148164
FBtr0086336	Toll-7	5	0.211032	0.222017	0.240118	0.181515	0	0.19059	0.200765	0.207315	0.802928	0.916892	0.963429	1	0.986605	0.990597
FBtr0342667;FBtr0305677;FBtr0305676;FBtr0086340	CG8654	6	0.0920676	0	0.106174	0.0789769	0.11823	0.771872	0.799791	0.938125	0.896664	1	0.839242	0.822788	0.84328	0.300814
FBtr0100232;FBtr0086492;FBtr0301609;FBtr0308796;FBtr0304655;FBtr0304656;FBtr0310331;FBtr0304654;FBtr0308792;FBtr0308790;FBtr0308786;FBtr0308797;FBtr0308791;FBtr0308785;FBtr0332857;FBtr0086495;FBtr0301610;FBtr0304653;FBtr0308795;FBtr0308793;FBtr0110898	sm	5	0	0.00406118	0.00338007	0.0331973	0.00381156	0.0327031	0.00348852	0.00396197	0.626373	0.595273	0.745586	0.86944	0.826409	1
FBtr0086509;FBtr0340469	cora	5	0.0319528	0.0379215	0.174072	0.0339054	0	0.0228733	0.0408741	0.0221141	0.522087	0.783908	0.900422	0.895344	0.958078	1
FBtr0340470;FBtr0086510	wbl	5	0.074014	0.072709	0.0521828	0.0615261	0	0.0469311	0.456363	0.529759	0.602343	0.734879	0.996137	0.967404	1	0.954217
FBtr0330057;FBtr0086512;FBtr0330058	rib	6	0.448243	0	0.0364524	0.488084	0.539341	0.685292	0.765799	0.896795	0.974059	0.975165	1	0.971318	0.907897	0.864321
FBtr0086535	CG7744	2	1	0.988881	0.870743	0.866557	0.894324	0.835209	0.831395	0.666789	0.0440863	0.0313194	0	0.0608631	0.00731045	0.0515546
FBtr0334008;FBtr0086555	CG9416	5	0.0468116	0.0268796	0.0970364	0.0563992	0.0422226	0.0482982	0	0.034644	0.218692	0.602162	0.83592	0.961511	0.926618	1
FBtr0086560	mip40	6	0	0.0491667	0.0806313	0.822122	0.84761	0.895313	0.838538	0.846717	0.960069	0.863186	0.927955	0.940382	1	0.993547
FBtr0340450;FBtr0100176;FBtr0086583;FBtr0086582;FBtr0100174;FBtr0086584;FBtr0114623	ena	6	0	0.681694	0.74098	0.741412	0.799143	0.94207	0.969064	0.970779	0.985647	0.97045	0.980875	0.957067	1	0.940241
FBtr0086600;FBtr0331978	CG15107	6	0.0263365	0.0603092	0	0.702939	0.731899	0.76167	0.722919	0.87915	0.895286	0.874835	1	0.861434	0.888471	0.88263
FBtr0086601	prod	6	0	0.0436275	0.182812	0.703079	0.709361	0.747517	0.797898	0.873588	0.89469	0.936222	1	0.973462	0.874144	0.965783
FBtr0086613	CG15080	4	0.00942554	0.0237428	0.0624015	0.0632918	0.028514	0.0657301	0.0271006	0	0.0281313	0.019136	0.438351	0.530634	0.656973	1
FBtr0086629	CG15098	2	0.998419	0.833763	1	0.908086	0.922945	0.887145	0.829127	0.856752	0.815629	0.819772	0.0217955	0	0.0584604	0.0450792
FBtr0301862;FBtr0301861;FBtr0086658;FBtr0086657	SP2637	3	0.0992912	0	0.107802	0.0863961	0.0907279	0.0980213	0.10148	0.861633	0.82566	0.810791	0.849019	1	0.955776	0.940179
FBtr0086668	Idgf5	4	1	0.972608	0.962872	0.0585856	0.0445273	0.0700964	0.038073	0.0522408	0.0634091	0.0737215	0.0236357	0	0.118643	0.0608077
FBtr0086675	GstE7	3	0	0.0171107	0.0805891	0.987131	0.941045	0.97945	1	0.934583	0.88744	0.957988	0.904673	0.902957	0.927302	0.8283
FBtr0331958;FBtr0086693	slim	5	0.0283085	0.0627755	0.0868053	0	0.0945708	0.0293603	0.85703	0.837994	0.938111	1	0.748969	0.820998	0.610302	0.0184504
FBtr0086699;FBtr0113093	CG10924	5	0.414177	0.259804	0.279094	0.0177921	0	0.183376	0.288379	0.561958	0.783099	0.856707	1	0.979985	0.936779	0.948585
FBtr0086701	Pepck	3	0.0107055	0.00643007	0	0.513347	0.553577	0.636346	0.620566	0.664867	0.743225	0.869003	0.860446	0.902454	1	0.8761
FBtr0086732;FBtr0346952;FBtr0113092;FBtr0329994	CG5098	6	0.114623	0.0130228	0.069834	0.891573	1	0.0281344	0	0.930999	0.964089	0.928052	0.911745	0.88831	0.936945	0.847334
FBtr0086734	Dip3	3	0	0.0244456	0.874201	0.780527	0.69955	0.840714	0.780584	0.767268	0.833908	0.701703	0.906495	0.913728	0.902993	1
FBtr0345416;FBtr0086746	CG10915	6	0.0177651	0	0.0569972	0.024243	0.757539	0.858838	1	0.872981	0.868206	0.940395	0.932348	0.954456	0.969949	0.909929
FBtr0086782;FBtr0110965;FBtr0110964;FBtr0110966	Hsf	6	0.0546588	0.000437341	0.0866129	0	0.892063	0.740807	0.790635	0.890188	0.968576	0.851415	0.90226	0.935713	0.884801	1
FBtr0304733;FBtr0086827	CG14480	6	0.0105427	0	0.0518959	0.875188	0.855379	0.982639	0.937753	0.888014	0.961822	0.932611	0.924062	0.910567	1	0.885278
FBtr0086899	CG30105	2	0.0767523	0.0386987	0.0222392	0.133883	0.869012	0.878963	0.979628	0.978835	1	0	0.0558019	0.0690593	0.058981	0.0557723
FBtr0329862;FBtr0086900	RhoGAP54D	2	0	0.10138	0.949726	0.94722	0.922311	0.826645	0.96151	1	0.0587277	0.136533	0.0877289	0.0605925	0.0403369	0.111174
FBtr0086909	Sip1	5	0.070847	0.0443727	0.081655	0	0.0466762	0.075515	0.0541594	0.971944	0.946834	0.945939	0.873225	0.948993	1	0.875149
FBtr0086915;FBtr0086914;FBtr0086913;FBtr0086912	l(2)k01209	6	0.0363748	0	0.053647	0.906685	0.933398	0.936324	0.962548	1	0.997541	0.969479	0.943145	0.974578	0.959279	0.939322
FBtr0086917	Lhr	2	0	0.0291366	0.0169624	0.00368601	0.0759712	0.0536602	0.0534243	0.0640121	0.0608724	0.948369	0.950445	0.957037	0.986146	1
FBtr0086937;FBtr0086934;FBtr0086933;FBtr0086935	CG4847	4	1	0.947455	0.831507	0.052613	0.0495898	0.0792514	0.0599732	0	0.0453626	0.0971653	0.0695725	0.0334604	0.05251	0.0694445
FBtr0086939;FBtr0086938;FBtr0340216	CG4853	1	0.0594025	0.0694767	0.031693	0.0839381	0.0349503	0.075594	0.0534665	0.0323091	0.0637913	0.0540883	0.0597436	0.00150816	0	1
FBtr0086940	CG4866	6	0	0.0205956	0.00214105	0.683604	0.713265	0.73556	0.708569	0.807949	0.872249	0.872676	0.938107	1	0.915168	0.966842
FBtr0340220;FBtr0340219;FBtr0113090;FBtr0086946	MESR4	6	0.0397159	0.0726791	0	1	0.906076	0.904761	0.96907	0.925184	0.926548	0.90931	0.894569	0.922828	0.867616	0.956939
FBtr0306574;FBtr0086966	CG6805	2	0.799962	0.963074	0.92144	0.890649	0.753644	0.0265549	0	1	0.888648	0.926664	0.937485	0.982493	0.943021	0.969163
FBtr0086975	fat-spondin	4	0.905671	1	0.794954	0.739408	0	0.0150434	0.000377437	0.699692	0.697875	0.517797	0.786437	0.824154	0.941198	0.909504
FBtr0306810;FBtr0087013	CG8950	6	0.0569474	0	1	0.804297	0.801354	0.808798	0.830759	0.804785	0.797239	0.836587	0.917194	0.860943	0.915314	0.860235
FBtr0087058	NiPp1	6	0.0631222	0.0832443	0	0.764136	0.886686	0.0404455	0.0713553	0.929473	0.973318	0.976173	0.918595	0.935634	1	0.925668
FBtr0306250;FBtr0306249;FBtr0302206;FBtr0302205;FBtr0087108	CG5065	4	0.0431576	0.0442071	0.0517468	0.0606267	0.0183621	0.00639004	0.0140595	0	0.322977	0.340798	0.727268	0.871765	0.786571	1
FBtr0340068;FBtr0340067;FBtr0087114;FBtr0087115	Picot	4	1	0.869629	0.741751	0.716868	0.661403	0.725598	0.0405905	0.0016104	0	0.047082	0.0327097	0.0534139	0.0256317	0.0265556
FBtr0340022;FBtr0087140	CG30100	1	0.969461	1	0.901052	0.0675605	0.0273914	0	0.0534862	0.0157867	0.0526102	0.0361176	0.0841035	0.0652204	0.0941514	0.162067
FBtr0087144	CG4282	2	0.0309907	0.0527792	0.0571077	0	0.0977024	0.0491426	0.0803421	0.102736	0.64837	0.779348	0.858561	0.973047	1	0.908667
FBtr0087157	CG4398	5	0.0657991	0.0478578	0.032861	0.0744241	0.64108	1	0.721259	0.61877	0.907107	0.0337547	0.0508939	0	0.09848	0.150619
FBtr0087220;FBtr0305090;FBtr0336734	Asph	3	0.0569364	0	0.0079591	0.0329376	0.00900219	0.690465	0.744927	0.893833	0.865274	0.898395	0.939228	0.961807	0.959756	1
FBtr0087244	shark	2	0.0357761	0.00977816	0.05312	0	0.00985965	0.0104892	0.0305677	0.0162441	0.0194619	0.673551	0.679917	0.696823	1	0.642269
FBtr0304748;FBtr0087247	CG8441	6	0.0333461	0	0.7219	0.792562	0.722884	0.733408	0.735933	0.77031	1	0.764794	0.809961	0.89037	0.927641	0.839851
FBtr0087249	CG8435	6	0.0247702	0	0.0125429	0.853919	0.886341	0.775979	0.845163	0.927725	1	0.963763	0.869063	0.775991	0.934824	0.767227
FBtr0340013;FBtr0308815;FBtr0308814;FBtr0087287	tun	3	0.0116495	0.0780491	0.0737689	0.765925	0.848086	1	0.868742	0.820907	0.850626	0.869851	0.877652	0.975517	0.875042	0
FBtr0087332;FBtr0087331;FBtr0340001	GalNAc-T1	5	0.800758	0.695594	0.775775	0.692056	0.584496	0.585959	0.044935	0	0.676064	0.701096	0.867253	0.941161	0.89204	1
FBtr0087342	CG8207	6	0	0.0314696	0.0712528	0.927874	0.874085	0.948018	0.969901	0.946456	1	0.939337	0.962295	0.909993	0.934321	0.93418
FBtr0087346;FBtr0087344;FBtr0087343;FBtr0302330;FBtr0087345	fus	3	0.19274	0.155513	0	0.196035	0.102067	0.134594	0.72582	0.849842	0.906623	0.885331	0.895052	0.923037	0.982955	1
FBtr0329955;FBtr0346265;FBtr0087357;FBtr0329957;FBtr0329956	Khc-73	3	0.0362919	0.0599246	0	0.872558	0.825446	0.863628	0.985939	1	0.996746	0.966566	0.968989	0.914024	0.999429	0.96541
FBtr0345392;FBtr0087359;FBtr0340003	CG8180	1	1	0.953268	0.776779	0.485343	0.424289	0.0388359	0.08213	0.0232987	0.0463973	0.0505906	0	0.0488993	0.0427452	0.0519883
FBtr0087366	CG11808	1	0	0.114111	0.0667863	0.0474388	0.100475	0.0558838	0.107799	0.0311347	0.108218	0.0864951	0.0734333	1	0.0893292	0.0896566
FBtr0087388	Pms2	2	0.913723	1	0.944391	0.906663	0.896294	0.903356	0.984355	0.78406	0	0.0358655	0.0784551	0.087722	0.0601937	0.0275129
FBtr0303759;FBtr0087407	Lap1	6	0.00387812	0	0.918297	0.905565	0.818437	0.824562	0.844993	0.830356	0.849261	0.841941	0.964794	0.823636	1	0.951333
FBtr0087416;FBtr0087415;FBtr0111006;FBtr0305216;FBtr0305213;FBtr0305215;FBtr0305214	chn	3	0	0.0461543	0.0254022	0.802083	0.826173	0.801345	0.859616	0.969309	0.965173	1	0.670521	0.834194	0.582386	0.839881
FBtr0303762;FBtr0303761;FBtr0303760;FBtr0087428	CG10253	4	0.0570775	0.134587	0.112718	0.00548901	0.0530463	0.0443613	0.0798872	0	0.00464139	0.029621	0.0589761	0.8275	0.794686	1
FBtr0087433;FBtr0339980	CG10139	6	0.0520999	0	0.720747	0.875649	0.881755	0.863033	0.846661	0.863945	0.926481	0.927247	0.978859	1	0.926002	0.94238
FBtr0087441	BEAF-32	2	0	0.110739	0.0645248	0.0359129	0.0372189	0.0223013	0.0550467	0.0548969	0.858895	0.790095	0.801904	0.960842	0.892087	1
FBtr0305588;FBtr0087442	BEAF-32	6	0	0.0874673	0.714827	0.805779	0.887616	0.840001	0.92201	0.879041	0.965955	0.943282	0.996888	1	0.967743	0.984887
FBtr0087453;FBtr0339984	Cyp6a19	1	1	0.974099	0.884495	0.922912	0.833063	0.782277	0.757909	0.0196686	0.0285738	0.0205164	0.0531668	0.0289425	0.0623507	0
FBtr0087455	Cyp6a8	3	0.648356	0.0347244	0	0.844759	0.837238	0.76473	0.928591	0.88062	0.925643	0.938863	1	0.987664	0.953267	0.893381
FBtr0087473;FBtr0087472;FBtr0087471;FBtr0289934	CG10151	5	0.0976863	0.0540511	0	0.11533	0.0490681	0.157493	0.0649298	0.106835	0.0878029	0.0895976	0.736657	0.814917	1	0.949657
FBtr0087487	Sin1	1	1	0.901966	0.907011	0	0.0589434	0.0367214	0.0837467	0.0994522	0.019858	0.0475809	0.0529094	0.0624315	0.0409311	0.0352856
FBtr0332930;FBtr0100154;FBtr0087493;FBtr0332929	Asx	2	0.181912	0.189083	0	0.121889	0.13943	0.0782589	0.0910357	0.054201	1	0.914688	0.954886	0.989751	8.18404e-05	0.156508
FBtr0339990;FBtr0087517	CG17385	2	0.0539832	0.0189349	0	0.0298636	0.100387	0.0719192	0.0434996	0.0719571	0.0177847	0.0641856	0.732135	1	0.941567	0.828074
FBtr0087534;FBtr0087533;FBtr0087532	CG8468	5	0.447927	0.322298	0.284181	0.024079	0.0423192	0.0223159	0	0.572201	0.658718	0.723434	0.886479	0.907233	0.827157	1
FBtr0087581	CG13018	5	0	0.0142864	0.0745253	0.0279435	0.0179037	0.0114172	0.0118741	0.0925133	0.0688524	0.74985	0.812693	0.977856	0.940765	1
FBtr0273226;FBtr0273225;FBtr0301592;FBtr0087619;FBtr0273223;FBtr0273224;FBtr0273222;FBtr0087617;FBtr0301591;FBtr0087616;FBtr0304849;FBtr0304850;FBtr0301593;FBtr0304852;FBtr0304848;FBtr0304853;FBtr0304847;FBtr0087618;FBtr0301964;FBtr0087620;FBtr0304851	shot	5	0.0234458	0.0129355	0.0842553	0.0493661	0.0214676	0.0488719	0	0.0527761	0.0630231	0.777523	0.802213	0.855721	0.837496	1
FBtr0087621	shot	5	0.0332314	0.0451683	0.0241133	0.0254519	0.00113469	0	0.0108186	0.018017	0.623613	0.650126	0.742953	0.739558	0.845549	1
FBtr0344896;FBtr0344895;FBtr0301387;FBtr0087668	mars	2	0.701123	0.7021	1	0.983718	0.982783	0.972204	0.958895	0.972419	0.882633	0.788492	0.38083	0.298074	0.0828103	0
FBtr0087702	arr	6	0.113807	0	1	0.931703	0.909666	0.940056	0.922922	0.90446	0.915806	0.872404	0.886932	0.810998	0.821699	0.680824
FBtr0087738	CG4627	5	0.0273636	1	0.895626	0.823644	0.828767	0	0.0563275	0.697377	0.760265	0.774487	0.816902	0.892119	0.767877	0.916836
FBtr0087740;FBtr0087741;FBtr0333149	Dp	6	0	0.698274	0.852734	0.804915	0.780773	0.780008	0.811908	0.89996	0.924623	0.919658	0.966797	1	0.934651	0.976844
FBtr0087745;FBtr0345532	Mp20	4	0	0.0175019	0.00425497	0.0266076	0.0949281	0.00533729	0.0709417	0.0388041	0.0600243	0.501963	0.548867	0.76166	1	0.920544
FBtr0345371;FBtr0087792	CG13321	4	0.397583	0	0.0336208	0.0262956	0.00872691	0.0189641	0.292852	0.297392	0.296631	0.4888	0.480336	0.622555	0.79325	1
FBtr0345375;FBtr0345196;FBtr0087798	Psc	6	0.00677148	0.0131858	0	0.786818	0.780277	0.866621	0.867328	0.943938	0.952575	1	0.942195	0.909786	0.93088	0.901494
FBtr0087801;FBtr0302198	Mdr49	2	0.0618822	0.0396772	0.135148	1	0.99173	0.935651	0.838286	0.0802297	0.0753111	0.0192207	0.0716412	0	0.0333846	0.07061
FBtr0339649;FBtr0087822;FBtr0087821	fra	3	0	0.0138561	0.556201	0.816161	0.872095	0.907062	0.91561	1	0.967681	0.983739	0.973498	0.893063	0.938647	0.830353
FBtr0087824	Cyp301a1	4	0.0129311	0.00240591	0.0325198	0.0191893	0.0459943	0	0.0350167	0.0158148	0.00283557	0.00384718	0.583406	0.730635	0.689355	1
FBtr0087840	spt4	6	0.0312903	0	0.712384	0.816132	0.8329	0.814326	0.875271	0.787444	0.908339	0.85225	0.952281	1	0.919387	0.967026
FBtr0087856;FBtr0087855	sca	2	0.0683167	0.1066	0.00630107	0.849259	0.890715	1	0.911464	0.899339	0.155495	0.0843992	0.11597	0	0.129052	0.120144
FBtr0087869;FBtr0302151;FBtr0087870;FBtr0087868;FBtr0087867;FBtr0339742;FBtr0339741;FBtr0339740	nemy	4	0	0.0718886	0.0459004	0.0274621	0.00568769	0.0343841	0.0556684	0.055529	0.0647589	0.0285652	0.613814	0.779861	0.893427	1
FBtr0087886;FBtr0087885;FBtr0333103	muskelin	1	0.999014	1	0.980365	0.504143	0.452572	0.46504	0.3837	0.200219	0.129887	0.153168	0.226714	0.223549	0.193681	0
FBtr0087912	CG13159	4	0.0267519	0.0339263	0.0944232	0.0150473	0	0.0634234	0.0525312	0.0286986	0.0514155	0.263946	0.488752	0.665375	0.739199	1
FBtr0346630;FBtr0087927	CG8525	6	0.0112973	0	0.65977	0.923608	0.899464	0.902012	0.931454	1	0.880191	0.888964	0.951524	0.918269	0.923289	0.888214
FBtr0087929;FBtr0087930;FBtr0100298;FBtr0305077;FBtr0308613;FBtr0305076;FBtr0113074	Dyb	3	0.0386205	0	0.00822595	0.0141978	0.627631	0.706961	0.765627	0.857463	0.792016	0.832218	0.809309	0.827659	0.882591	1
FBtr0087934	CG8545	6	0.0165202	0	0.317527	0.62463	0.695889	0.711437	0.753032	0.808994	0.842881	0.885759	0.95472	0.978081	0.942986	1
FBtr0087975	CG8321	4	0.00976624	0.00657469	0.0863224	0.0674151	0.0709881	0.0196487	0.202122	0	0.0915621	0.0210013	0.0853423	0.936524	0.930632	1
FBtr0345018;FBtr0304964;FBtr0304963;FBtr0088002;FBtr0088001	Cam	3	0	0.190029	0.0768649	0.913085	0.892367	0.882209	0.922326	0.921782	0.993013	0.938432	0.993875	0.811396	1	0.813549
FBtr0303037;FBtr0088004	Sr-CII	2	0.0460986	0.00636591	0	0.934901	0.918929	0.960426	1	0.987642	0.871651	0.771056	0.0223215	0.0513137	0.0137882	0.0662598
FBtr0333063;FBtr0088018;FBtr0088017	CG8878	6	0.106341	0.0388193	0	0.948458	0.851453	0.96091	0.955685	0.971012	0.965723	1	0.962384	0.970553	0.927706	0.879728
FBtr0088028;FBtr0344879	otk	5	0.0424566	0	0.00853989	0.0378891	0.00929023	0.0293644	0.0427487	0.664072	0.678102	0.812107	0.940731	0.959327	0.930887	1
FBtr0088046	RnrS	2	0.516199	0.518799	0.497642	0.92569	0.877102	0.96072	1	0.958563	0.876093	0.645715	0.298953	0.163842	0.249942	0
FBtr0088062	TwdlBeta	4	0.0680212	0.0418035	0.0375238	0.0330682	0.0615411	0.0543456	0.0421661	0.043875	0.0580829	0	0.0375974	0.0361362	0.0146795	1
FBtr0330619;FBtr0088100;FBtr0088099;FBtr0088098;FBtr0088101;FBtr0330620	shn	3	0	0.0181399	0.0730456	0.0636533	0.0975279	0.995791	0.909135	0.918018	0.649279	1	0.817995	0.834235	0.0630403	0.0315286
FBtr0088104;FBtr0088103;FBtr0088102	Syx6	1	0.0622925	0.0924393	0	0.0512779	0.0661207	0.0552111	0.0198668	0.0771028	0.0550182	0.03301	0.0454402	1	0.955105	0.0705386
FBtr0088105;FBtr0339479	CG7737	3	0.0370832	0	0.0137855	0.982758	0.801493	0.869446	0.852706	1	0.974069	0.911046	0.784586	0.770301	0.870361	0.873178
FBtr0088133	CG7759	5	0.0236206	0.0837051	0.0311686	0.0269623	0.0168414	0.0933471	0.0404473	0.0503078	0.0575229	0	0.88125	0.950233	0.987482	1
FBtr0331386;FBtr0088135	CG7763	2	0.0420541	0.0717965	0.00461377	0	0.0964396	0.0649011	0.0785509	0.0249651	0.055672	1	0.961636	0.928575	0.923647	0.827299
FBtr0088137;FBtr0339544;FBtr0088136;FBtr0305074	CG7777	1	1	0.764905	0.641756	0.539002	0.45079	0.464971	0	0.0375632	0.0376724	0.0479262	0.0140124	0.00203071	0.0466867	0.0652254
FBtr0088154	ix	6	0	0.106682	0.0469236	0.848454	0.744478	0.749647	0.0593722	0.0538725	0.953903	1	0.843521	0.971121	0.933162	0.910459
FBtr0304899;FBtr0300578;FBtr0304900;FBtr0303223;FBtr0088214;FBtr0339463;FBtr0330601	stan	5	0.091386	0	0.0555022	0.0449131	0.0290563	0.0401637	0.0401325	0.0641845	0.818801	0.75669	1	0.983717	0.923805	0.981113
FBtr0088235;FBtr0339521	CG30020	6	0	0.00567478	0.898412	0.946561	1	0.945886	0.967423	0.955431	0.951393	0.909842	0.944091	0.95545	0.928975	0.920132
FBtr0088243;FBtr0088242;FBtr0331938;FBtr0306393;FBtr0113356;FBtr0331939;FBtr0113357	CG30015	3	0	0.0353465	0.0414316	0.0519337	0.0488025	0.0754864	0.690392	0.714616	0.928752	0.867175	0.906061	0.933646	0.802608	1
FBtr0339475;FBtr0088245	CG7686	6	0.0202458	0.0703689	0	0.0455435	0.0308791	0.832579	0.934564	0.879782	0.905599	0.889595	0.923575	0.858803	1	0.819804
FBtr0088247	CG12343	6	0.0420562	0	0.0585133	0.845395	0.869772	0.806457	0.866339	0.923618	0.930054	0.882076	0.915962	1	0.881463	0.947486
FBtr0088273	CG11777	6	0	0.0470707	0.0400294	0.836245	0.831765	0.704444	0.863199	0.839658	0.936167	0.762277	0.925797	1	0.927288	0.0280099
FBtr0088274	CG17765	3	0.0446627	0.026245	0	0.92433	0.905004	0.907721	0.922691	0.881973	0.938753	0.935394	0.950039	1	0.985939	0.935636
FBtr0088282;FBtr0088275;FBtr0346958;FBtr0088276;FBtr0330607;FBtr0100607;FBtr0100606;FBtr0088281;FBtr0088280;FBtr0088279;FBtr0088278;FBtr0088277	psq	6	0	0.0563302	0.566553	0.895379	0.945163	0.966331	0.99156	0.997066	1	0.995996	0.985916	0.970538	0.965501	0.963597
FBtr0088344;FBtr0301965	CAP	4	0.111935	0.00377407	0.0181485	0.135325	0.199381	0.0681422	0.0410219	0	0.0641889	0.0568231	0.035914	0.0568702	1	0.968953
FBtr0339459;FBtr0088349	Ndg	4	0.0340077	0	0.0282551	0.0295069	0.00427425	0.0402449	0.0328744	0.0315367	0.265724	0.274637	0.618316	0.759392	0.690751	1
FBtr0088393	CG12128	6	0	0.00973266	0.502413	0.814368	0.763205	0.814447	0.819669	0.809657	0.873236	0.885839	0.94411	0.99642	0.919702	1
FBtr0339418;FBtr0088436;FBtr0339419;FBtr0339420;FBtr0088435;FBtr0330325	CG1407	2	0.0345575	0.262191	0.108114	0.0949571	0.0541407	0.0511925	0.120087	0.0727498	0.966895	1	0.170938	0.158808	0	0.967026
FBtr0088440	CG1418	2	0.0473089	0.0118007	0.108773	0.0501693	0.0511433	0.0340884	0	0.824833	0.690667	0.728641	0.880835	1	0.923515	0.931988
FBtr0088447;FBtr0088446;FBtr0330707;FBtr0088445;FBtr0088444;FBtr0088443;FBtr0330708	Mef2	5	0	0.0707026	0.0490086	0.0729979	0.0185814	0.023708	0.0440929	0.0476063	0.923459	0.863528	0.95306	0.980588	1	0.882493
FBtr0339403;FBtr0088493;FBtr0088494	CG1648	4	0.117344	0.0448319	0	0.0627229	0.0918641	0.0736214	0.0773539	0.0643332	0.048419	0.0481529	0.720552	0.89963	0.933175	1
FBtr0088499	Uba1	6	0.042292	0	0.826156	0.855736	0.831211	0.939368	0.904454	0.909463	0.983242	0.896776	0.874468	0.888664	1	0.798615
FBtr0088532;FBtr0088531	CG1902	3	0.0756722	0	0.0468479	0.774368	0.751936	0.844283	0.850538	0.894615	0.918639	0.923669	0.904727	0.929471	1	0.980193
FBtr0339393;FBtr0088542	CG1868	2	0	0.11921	0.0190451	0.900034	0.998241	1	0.974758	0.989356	0.973353	0.119579	0.0629195	0.0996138	0.069248	0.153309
FBtr0310033;FBtr0310032;FBtr0310031;FBtr0088547	CG1888	6	0.0720224	0.0344859	0	0.816662	0.84517	0.836668	0.818723	0.844523	0.895851	0.907489	0.93339	1	0.931365	0.998527
FBtr0088564	Dbp45A	6	0.0412629	0	0.157416	0.0612656	0.997549	0.889462	0.939093	0.72138	0.791077	0.838285	0.879509	0.949842	0.872566	1
FBtr0088566;FBtr0330624	Vang	2	0.148639	0.0675683	0.114368	0.103162	0.1197	0.105923	0	1	0.988629	0.889829	0.920518	0.928174	0.898134	0.938079
FBtr0346631;FBtr0088581	CG8788	5	0.0899573	0.0272894	0	0.93019	0.858106	1	0.998145	0.103851	0.0710566	0.896689	0.159201	0.0943469	0.957332	0.175433
FBtr0088583	CG30344	3	0	0.0227218	0.533923	0.627266	0.614371	0.697375	0.671191	0.735969	0.766092	0.592628	0.746408	0.786256	0.78353	1
FBtr0088600	CG2063	6	0	0.0104093	0.754378	0.913946	0.860464	0.918845	0.922908	0.950047	0.931907	0.89772	0.953212	1	0.951818	0.933332
FBtr0088611;FBtr0302512;FBtr0302511	CG8026	4	0.989692	1	0.949753	0.0544697	0	0.105227	0.0477906	0.0869928	0.0492115	0.0981585	0.060704	0.0752294	0.115082	0.0733471
FBtr0088635;FBtr0339277;FBtr0111043	sns	5	0.121415	0.145532	0.124866	0.128304	0.127562	0.154552	0	0.14004	0.1692	0.88593	0.863553	1	0.173324	0.107649
FBtr0088684	MrgBP	6	0.0252474	0.0987653	0	0.0949969	0.827335	1	0.756285	0.916654	0.927996	0.9129	0.972122	0.950546	0.92554	0.970188
FBtr0339337;FBtr0088710	gcl	2	0.124667	0.0979564	0.0980714	0.0734432	0.217085	0.0520889	0	0.0402349	0.0327502	0.906987	0.915006	0.887418	0.935519	1
FBtr0088718;FBtr0088720;FBtr0088719	CG14767	1	0.981987	1	0.843944	0.0017147	0	0.0498044	0.0482875	0.0122818	0.113584	0.0124964	0.024342	0.02618	0.0358423	0.0489141
FBtr0345935;FBtr0088788	Rs1	6	0	0.308035	0.36899	0.670742	0.640681	0.718758	0.7547	0.799112	0.83238	0.847627	0.923924	0.959831	0.921292	1
FBtr0331379;FBtr0088790	Mlh1	2	0.060616	0.127737	0.0572996	1	0.846988	0.817309	0.0562744	0	0.0799309	0.0705696	0.0520373	0.0702156	0.0231369	0.0552993
FBtr0088804	CG14756	5	0.0320394	0	0.0576216	0.0162127	0.0408165	0.0247341	0.00194932	0.0255641	0.000664251	0.0325083	0.737051	0.801491	0.903992	1
FBtr0339296;FBtr0088814;FBtr0088813;FBtr0088812;FBtr0088811	kermit	3	0.0978525	0.0768872	0.117431	0.0886902	0.124065	0	0.928741	0.931909	0.935658	0.969229	0.923058	0.949888	1	0.116866
FBtr0339121;FBtr0088844	CG30377	1	1	0.759329	0.778954	0.00523271	0.0266698	0	0.0276113	0.0420136	0.0395198	0.0205596	0.0286723	0.0168949	0.02656	0.0620719
FBtr0088889;FBtr0088888	CG12159	1	1	0.987576	0.930302	0.057199	0.0413864	0.0173683	0.0589784	0.018181	0.0311054	0.0064625	0.0118493	0.04379	0	0.00792044
FBtr0088912	scra	2	0.0251122	0.0296693	0.0234093	0.983957	0.933248	0.969267	0.95856	1	0.83022	0.656946	0.036031	0.0325015	0	0.00999085
FBtr0088923	CG2064	5	0.862001	0.887454	0.792601	0.00473263	0.0261533	0.0163578	0.000181128	0	0.870785	0.830347	0.970283	0.949561	0.977449	1
FBtr0088928	CG1942	5	0.0929664	0.0372673	0.11368	0	0.0999301	0.128203	0.0436276	0.71045	0.824913	0.734651	0.875187	0.940986	0.81307	1
FBtr0088932;FBtr0331966;FBtr0088934;FBtr0088933	CG30497	1	0.725049	0.696137	1	0.870941	0.855648	0.76107	0.67446	0.0109187	0.0296483	0.068554	0.0520267	0.0434673	0	0.0595371
FBtr0088937;FBtr0330327;FBtr0088936;FBtr0306239;FBtr0330328;FBtr0088935	CG18812	4	0.858318	1	0.93408	0.895765	0.0510441	0.0874982	0.0510763	0.100552	0.138727	0.0577201	0.0595495	0.155663	0.0997314	0
FBtr0339117;FBtr0088938	tor	1	0.825884	0.877075	1	0.924507	0.940266	0.809463	0.671746	0.00220314	0	0.0470082	0.0202254	0.00113765	0.0275557	0.0115734
FBtr0088946	CG17985	5	0.821652	0.887703	1	0.843317	0.961135	0.941828	0.901964	0.995849	0.811079	0.831148	0	0.0339632	0.789831	0.824102
FBtr0088959	Orc1	2	0.761398	0.813003	1	0.765351	0.782584	0.711694	0.746054	0.756004	0.674503	0.671527	0.0345588	0.0338155	0.0230021	0
FBtr0336908;FBtr0088961	Incenp	2	0.122516	0.0397897	0.757299	0.881599	0.753271	0.913366	0.901488	0.959475	0.922091	1	0	0.132591	0.108915	0.102579
FBtr0088971	CG11123	6	0	0.492804	0.606481	0.825985	0.743538	0.787129	0.760186	0.786904	0.847948	0.917057	0.918299	0.979576	0.925079	1
FBtr0336916;FBtr0089015	cos	6	0.042157	0.0496385	0.788026	0.773535	0.782473	0.853041	0.828629	1	0.746441	0.709169	0.785232	0.810681	0.976386	0
FBtr0089023	Tsp42Ef	4	1	0.96086	0.965839	0.0245265	0.0450552	0.0426098	0.0751365	0.0229053	0.0453686	0.00197469	0	0.018799	0.0163074	0.0430629
FBtr0089041	Spn43Aa	5	0.0258576	0.00362994	0.00527723	0.0304513	0.0148259	0	0.0284148	0.0512376	0.36207	0.598665	0.992308	1	0.961328	0.920602
FBtr0089069;FBtr0089067;FBtr0089065;FBtr0333670;FBtr0089063	CaMKI	3	0.0268471	0	0.0217258	0.897	0.899891	0.84743	0.934399	0.89334	0.95222	0.920293	0.943072	0.924873	1	0.953688
FBtr0332913;FBtr0307167;FBtr0089070	zfh2	5	0.046761	0.0460907	0.0311947	0.026139	0	0.0201286	0.0410598	0.0576904	0.856688	0.946901	0.955016	1	0.974975	0.979801
FBtr0089110	bip2	6	0	0.00657466	0.871387	0.866035	0.92016	0.860999	0.886282	0.844313	0.875851	0.90221	0.954577	0.942995	0.94544	1
FBtr0345284;FBtr0089126;FBtr0089125;FBtr0334479	Hcf	6	0	0.0877676	0.00477345	0.85831	0.923937	0.890763	0.875795	0.836629	0.936109	0.824243	0.982211	0.962598	0.874933	1
FBtr0089178;FBtr0306168	ci	6	0	0.0711273	0.0844498	0.855582	0.925999	0.982078	0.988727	0.96201	1	0.917388	0.876557	0.823224	0.828207	0.00368562
FBtr0089221;FBtr0344706;FBtr0344705	CG11076	3	0.213931	0	0.343577	0.303758	0.503948	0.456623	0.480133	0.634216	0.7123	0.804628	0.888053	0.937238	0.869886	1
FBtr0089349;FBtr0089342	lola	2	0.420026	0.610664	0.940645	0.964384	1	0.866617	0.795539	0.598946	0.585211	0.635638	0.525626	0.446129	0.0207728	0
FBtr0089357;FBtr0089347;FBtr0343133;FBtr0334469	lola;pre-lola-G	2	0.536295	0.559123	0.852681	0.947116	0.969254	0.938279	0.975298	1	0.846312	0.731155	0.272264	0.0140155	0	0.02886
FBtr0343132;FBtr0089350	lola	2	0.177209	0.177867	0.171975	0.128702	0	0.14956	0.148966	0.0908382	0.109296	0.757174	0.821316	0.964219	0.999508	1
FBtr0089395	pr	6	0.767298	0.0814957	0	0.949993	0.952422	0.970911	1	0.960309	0.97677	0.949234	0.991996	0.994393	0.958882	0.923268
FBtr0346441;FBtr0346440;FBtr0089420	Aprt	6	0	0.0147055	0.181807	0.848762	0.804236	0.986574	0.896767	0.988444	1	0.869132	0.990168	0.970319	0.90986	0.843044
FBtr0089427	ptc	6	0	0.157329	0.119661	0.99576	0.963796	0.907089	0.882111	0.890982	0.869016	0.915828	1	0.888717	0.0991052	0.0930217
FBtr0100580;FBtr0100577;FBtr0089442;FBtr0100582;FBtr0100581;FBtr0100578;FBtr0100579;FBtr0332977;FBtr0332976;FBtr0089441;FBtr0332978;FBtr0308208;FBtr0308209	ewg	5	0.00734741	0.0756963	0.0250564	0.0613846	0	0.0335902	0.00623959	0.0440525	0.0329972	0.67186	0.901875	0.956195	0.82577	1
FBtr0301478;FBtr0301477;FBtr0089521;FBtr0306350;FBtr0306351;FBtr0330046	Mvl	2	1	0.948213	0.812083	0.858164	0.850333	0.857037	0.76881	0.746172	0.762371	0.8187	0.79098	0.74076	0	0.0279377
FBtr0089550	CG5033	6	0.149199	0	0.22689	0.540338	0.574666	0.68682	0.725523	0.787328	0.841204	0.852659	0.906977	0.968725	0.91645	1
FBtr0089579;FBtr0332812	Nopp140	2	0.0738886	0.0604292	0	0.0469442	0.0883037	0.0574343	0.0752499	0.0923042	0.0865121	0.896401	0.912496	1	0.95714	0.957077
FBtr0089580	Nopp140	6	0.000169821	0	0.388729	0.500387	0.515583	0.647296	0.568776	0.782177	0.666205	0.903267	0.844912	1	0.768551	0.936324
FBtr0089584	CG7730	2	1	0.880414	0.971919	0.863194	0.884147	0.933179	0.764749	0.809855	0.0277791	0.0436353	0.0194933	0	0.0329687	0.0165944
FBtr0345120;FBtr0089585	TpnC73F	4	0.0465411	0.0363728	0.0255509	0.0379782	0.0534331	0.0167291	0	0.0815383	0.0118667	0.0702198	0.0840889	0.868447	0.759746	1
FBtr0332727;FBtr0310477;FBtr0089596;FBtr0089595;FBtr0332728	Fibp	5	0.846442	0.915034	1	0.736286	0.678613	0.657893	0.735491	0	0.0677332	0.106364	0.783934	0.853527	0.753412	0.823228
FBtr0346427;FBtr0342608;FBtr0305089;FBtr0089656;FBtr0089655	JhI-21	2	1	0.817854	0.750291	0.660694	0.610595	0.0766758	0	0.730758	0.583217	0.404882	0.600226	0.466163	0.582405	0.120383
FBtr0089686;FBtr0114453;FBtr0089685	CRMP	4	0.0247076	0.00334877	0.0575204	0.0153949	0.0640143	0.0212346	0	0.0409188	0.0602732	0.483563	0.735019	0.791344	0.821792	1
FBtr0089709;FBtr0089707;FBtr0089706;FBtr0089708;FBtr0089710;FBtr0089703;FBtr0089704	MESK2	4	1	0.93148	0.195348	0.0937505	0	0.130534	0.105938	0.103935	0.144325	0.0890645	0.118469	0.821418	0.891406	0.7712
FBtr0089728;FBtr0339473;FBtr0089729	CG18004	6	0.0540684	0.0378315	0	0.79315	0.827924	0.89664	0.876812	0.864333	0.89401	0.880321	0.930114	0.942328	0.942625	1
FBtr0089745;FBtr0089743;FBtr0089744	didum	2	0.116562	0.051455	0.150538	0.898258	0.988549	1	0.979469	0.888	0.888372	0.0368773	0.118108	0.0944034	0	0.0337329
FBtr0089747	Mlc2	4	0.0253579	3.17256e-05	0	0.531011	0.500711	0.00670812	0.0238403	0.0304003	0.276253	0.250906	0.51638	0.70408	0.85999	1
FBtr0089766	Cyp6d5	5	0.481401	0.381157	0.441054	0.00791993	0.0109901	0	0.383821	0.505954	0.590322	0.533767	1	0.986665	0.863066	0.83312
FBtr0309295;FBtr0309294;FBtr0089876;FBtr0089874;FBtr0332883;FBtr0089878;FBtr0089877;FBtr0089875;FBtr0089873	Nmda1	5	0.979994	0.939772	0.881698	0.887339	1	0.875477	0.903188	0.893131	0.168204	0.0998273	0.880061	0	0.167212	0.118318
FBtr0089905;FBtr0089901;FBtr0301521;FBtr0300562;FBtr0089904;FBtr0089900;FBtr0089902	Pten	6	0	0.966657	0.96158	1	0.790106	0.884499	0.900347	0.915262	0.918826	0.910721	0.838526	0.841189	0.859643	0.944387
FBtr0089934;FBtr0089932	ltd	1	0.937212	1	0.984679	0.0987373	0.0730215	0.099631	0.0688029	0.0762994	0	0.0601061	0.034312	0.0601678	0.0722307	0.0616465
FBtr0089942	scf	3	0.31972	0	0.246786	0.324859	0.284733	0.484052	0.492001	0.576165	0.725629	0.7572	0.947075	0.901219	0.968414	1
FBtr0335146;FBtr0089947;FBtr0335501;FBtr0089946;FBtr0089945	vari	5	0.026406	0.0450598	0	0.0220843	0.046499	0.0494242	0.0411322	0.0169502	0.0175963	0.55324	0.829472	0.916469	0.877215	1
FBtr0345720;FBtr0329952;FBtr0089948;FBtr0114603	CG9527	4	0.0360131	0.71342	0.641085	0.0858238	0.0464532	0.0314897	0.0621368	0	0.422159	0.563097	0.530115	0.688393	0.731507	1
FBtr0339328;FBtr0089973	Cenp-C	6	0	0.0442221	0.944892	0.868955	0.855836	0.825578	0.904336	1	0.918141	0.933402	0.787389	0.739182	0.809819	0.733199
FBtr0333721;FBtr0089978;FBtr0089974;FBtr0340141;FBtr0100376;FBtr0333720;FBtr0308217;FBtr0100375;FBtr0111034;FBtr0340142;FBtr0308218;FBtr0308220;FBtr0308219;FBtr0089975	sdt	3	0.0356017	0.0386031	0	0.848823	0.808323	0.950279	0.988005	0.94947	0.93851	1	0.877556	0.813888	0.80021	0.786543
FBtr0339549;FBtr0339548;FBtr0089979	E23	1	1	0.772061	0.6709	0.0831782	0.033591	0.0104505	0.0394571	0.0335457	0.100827	0.0719039	0.00971379	0.0558116	0.0767828	0
FBtr0090014;FBtr0090015;FBtr0090023;FBtr0090022;FBtr0090018;FBtr0090016;FBtr0090029;FBtr0090026;FBtr0090024;FBtr0090021;FBtr0090028;FBtr0090019;FBtr0090017;FBtr0090027;FBtr0090013	MRP	4	0.101478	0.110849	0.0225137	0.77853	1	0.847116	0.082727	0.0812539	0.0805553	0.0700177	0.112359	0.116716	0	0.0914272
FBtr0332000;FBtr0091489;FBtr0091487;FBtr0091486	PNUTS	3	0.0726697	0	0.027195	0.840867	0.849205	0.862843	0.885261	0.901976	0.909836	0.886591	0.968035	0.965826	0.953823	1
FBtr0091626	CG33649	2	0.182309	0.0430551	0.106853	0	0.0390741	0.168929	0.077043	0.071224	0.100107	0.0279581	0.979269	0.989028	1	0.994773
FBtr0091651	CG33672	3	0.02448	0.00634089	0	0.915048	0.871302	0.91321	0.95547	0.964435	1	0.924428	0.921826	0.988931	0.973064	0.877956
FBtr0091805	His1:CG33801	2	0.0267659	0	0.00669368	0.0182149	0.0105671	0.00210778	0.0163729	0.925159	0.994164	0.925072	0.929731	0.877887	1	0.943371
FBtr0100003	Cp7Fa	4	1	0.73113	0.0401253	0	0.0710621	0.0586668	0.0688864	0.0604318	0.0735668	0.0389345	0.0302602	0.0285435	0.0531735	0.00882423
FBtr0100230	CG18003	5	0.117192	0.110073	0.142197	0.0980958	0.11714	0.0609746	0	0.091993	0.82044	0.959887	0.849975	0.883428	0.972923	1
FBtr0100268	Chrac-14	2	0.603542	0.720681	0.846754	0.0468936	0.0546519	0.871205	0.797244	0.807018	1	0.834404	0.031052	0.0443214	0.0556691	0
FBtr0340452;FBtr0100282;FBtr0290317;FBtr0340453;FBtr0290314;FBtr0290318;FBtr0290316;FBtr0086588;FBtr0086585;FBtr0290312;FBtr0340451;FBtr0290313;FBtr0290311;FBtr0086586	CG10737	5	0.0996447	0.132247	0.112388	0.18023	0	0.144189	0.125115	0.14167	0.140793	0.645133	0.800859	0.883381	0.846109	1
FBtr0310330;FBtr0100329;FBtr0310329;FBtr0310328;FBtr0290120	CG9850	4	1	0.557805	0.475798	0.0364131	0.0540335	0.0633933	0.0294087	0.0235261	0	0.0163344	0.0325198	0.0541684	0.0335354	0.0389093
FBtr0100406;FBtr0100404;FBtr0100402	Dyrk3	6	0.0279101	0	0.814799	0.973228	0.942086	0.897523	0.938683	0.919822	0.873767	1	0.901165	0.981466	0.934405	0.984087
FBtr0344198;FBtr0100501	seq	2	0.100691	0.0803104	0.0496746	0	0.0311221	0.0298182	0.0363635	0.0997329	1	0.927636	0.944546	0.897812	0.970552	0.0586807
FBtr0100617;FBtr0336483;FBtr0336484;FBtr0078907	CG9795	2	0.0182652	0.0239555	1	0.972027	0.850371	0.823966	0.826105	0.899083	0.924193	0.701432	0.0336696	0	0.0334145	0.0420131
FBtr0309841;FBtr0100641;FBtr0309840	armi	2	0.743342	1	0.968788	0.854262	0.770256	0.832014	0.741589	0.652034	0.737817	0.656476	0.70225	0	0.054594	0.054518
FBtr0100866	mt:ATPase8	1	0.942058	1	0.888945	0.00808892	0.0103452	0.010911	0.000262045	0	0.0311315	0.0310768	0.0194365	0.0300405	0.0123004	0.0282559
FBtr0100870	mt:ND3	1	1	0.992476	0.977449	0.0397225	0.0309353	0.00929289	0.0285658	0	0.0112653	0.0212456	0.013599	0.0409383	0.0266416	0.0288994
FBtr0110801;FBtr0084390	CG4467	4	0.0358547	0.135412	0.0680769	0.0320783	0.0626323	0.0561043	0	0.0691774	0.0756275	0.0445635	0.0336819	0.013382	0.776298	1
FBtr0305186;FBtr0307087;FBtr0110877;FBtr0110876;FBtr0330170;FBtr0307086;FBtr0307083;FBtr0307085;FBtr0307082;FBtr0082533	l(3)neo38	3	0.0381061	0.0025669	0	0.660101	0.628982	0.731923	0.786814	0.871926	0.920339	0.922982	0.998852	1	0.972747	0.950926
FBtr0342603;FBtr0110911	Mt2	1	0.0208395	0.037394	0.0500945	0	0.0276374	0.0232399	1	0.0235738	0.0326179	0.000105638	0.0363429	0.0565822	0.0160005	0.0353587
FBtr0303249;FBtr0110947	CG34137	1	0.0530362	0.0504063	0.946835	1	0.703932	0.0589457	0.0699499	0.0477883	0.0838875	0	0.0609643	0.0656889	0.0938928	0.0625399
FBtr0110971;FBtr0345950;FBtr0110970;FBtr0346955;FBtr0330005;FBtr0330004	Mctp	4	1	0.964831	0.893728	0.689436	0.630245	0.676695	0.580894	0.580754	0.0432574	0.018608	0.0560305	0.11669	0	0.0320542
FBtr0110974;FBtr0083229;FBtr0083231	Mhcl	3	0	0.0473312	0.979029	0.852966	0.958869	0.939993	0.842301	0.991938	0.996688	0.980943	0.989934	0.924801	1	0.933217
FBtr0302695;FBtr0302694;FBtr0111032;FBtr0334303;FBtr0111031;FBtr0082039;FBtr0302693;FBtr0302692;FBtr0111029;FBtr0111028;FBtr0111027;FBtr0082038;FBtr0344283;FBtr0344284;FBtr0302691;FBtr0334304	ps	5	0.101004	0.0194627	0	0.0678697	0.112359	0.0679917	0.0800627	0.0801825	0.569285	0.631891	0.761396	0.796101	0.854703	1
FBtr0308810;FBtr0111111	Stlk	1	1	0.980336	0.952818	0.818623	0.781409	0.7714	0.793687	0.824988	0.0208528	0.0593555	0.0155423	0	0.0583142	0.112284
FBtr0334157;FBtr0111126	cta	2	0.0331222	0.0655278	0	1	0.9303	0.983885	0.907613	0.832842	0.0589877	0.0996244	0.023769	0.96151	0.941761	0.841231
FBtr0331166;FBtr0331165;FBtr0111127	Cht3	4	0.0775003	0.0704106	0.0559144	0.0294377	0.00699248	0	0.0641961	0.0126843	0.0199869	0.0377255	0.879524	0.848456	1	0.968053
FBtr0112350	CG34159	6	0.107848	0	0.811793	0.920877	0.896216	0.946241	0.89948	0.928605	1	0.991731	0.973876	0.968859	0.997687	0.950739
FBtr0340071;FBtr0112384	CG34191	3	0	1	0.019544	5.77179e-05	0.869185	0.840133	0.835004	0.855062	0.863504	0.864036	0.833585	0.844847	0.867918	0.896242
FBtr0112407	CG34214	2	0.10228	0.126377	0.0254187	1	0.925807	0.872026	0.788065	0.537851	0.715602	0.739171	0.095484	0	0.0576957	0.0977161
FBtr0300028;FBtr0112436	CG34242	4	0.999153	1	0.922849	0.897185	0.845034	0.807295	0.644953	0.784273	0.013671	0.0280459	0.0506288	0	0.0242521	0.0109881
FBtr0346453;FBtr0333516;FBtr0112506	CG34310	5	0.0123591	0.887105	0.0940284	0.0725453	0.0350205	0	0.0339227	0.0733519	0.755231	0.770358	0.726609	1	0.706933	0.818365
FBtr0112557	CG34348	6	0.0774655	0.106951	0	0.898095	1	0.0753779	0.127052	0.851807	0.872339	0.973978	0.935513	0.933737	0.935965	0.985653
FBtr0330338;FBtr0112593	Fili	5	0.0728611	0	0.0525881	0.00851208	0.01817	0.0454886	0.0406315	0.066582	0.642907	0.749893	0.864796	0.989553	0.878027	1
FBtr0329980;FBtr0112617;FBtr0329979	CG34380	4	0.97232	1	0.946975	0	0.147327	0.0401895	0.040318	0.0985831	0.0304948	0.106455	0.0743859	0.0724487	0.0734964	0.104219
FBtr0332409;FBtr0112638;FBtr0112639;FBtr0112641;FBtr0306333	CG34394	1	0.969099	0.980097	1	0.790159	0.739862	0.817145	0	0.0247331	0.0315362	0.0603342	0.0554092	0.000835781	0.0102238	0.0382679
FBtr0333160;FBtr0112653	CG34401	6	0.0793616	0	0.0894632	0.05756	1	0.791706	0.971071	0.93574	0.939266	0.860352	0.827871	0.930615	0.926661	0.906206
FBtr0343029;FBtr0112754;FBtr0112753;FBtr0331304;FBtr0112755;FBtr0308591;FBtr0343028	CG34449	2	0.87266	0.00516569	0.0338144	0.0834911	0.114534	0.030493	0.0225064	0.0708718	0	0.958552	0.894783	0.918873	0.912638	1
FBtr0112893;FBtr0334956;FBtr0334957;FBtr0082959;FBtr0334955	stumps	5	0.094472	0.138881	0.146224	0.0930179	0.15006	0	0.863511	0.663192	0.652227	0.710594	0.766879	0.833418	1	0.689797
FBtr0333811;FBtr0330106;FBtr0333750;FBtr0330105;FBtr0300577;FBtr0112927	Trf2	6	0.0412017	0	0.00757771	0.863809	0.975511	0.960364	0.978638	0.911258	1	0.973665	0.941956	0.878692	0.962467	0.859696
FBtr0336976;FBtr0112992	CG9915	6	0	0.55792	0.736923	0.929031	0.827897	0.886238	0.913855	0.942344	0.912476	0.899484	1	0.993365	0.89554	0.960174
FBtr0113019	CG12795	1	0.8722	0.916516	1	0.919151	0.647314	0.0354414	0.0229835	0.0735467	0	0.0153299	0.0321637	0.0233777	0.0371558	0.0226286
FBtr0306095;FBtr0113138;FBtr0333570;FBtr0333571;FBtr0306534;FBtr0306094;FBtr0308202;FBtr0306096;FBtr0306533;FBtr0073339;FBtr0308201	Cip4	3	0.0418718	0.102393	0	0.908121	0.914084	0.96584	0.912661	0.891542	0.891378	0.883483	0.875679	0.89274	1	0.91201
FBtr0345695;FBtr0345694;FBtr0113158;FBtr0113159;FBtr0114600;FBtr0076344	nudE	2	0.0319509	0.0197209	0.080374	0.0184446	0	0.0236311	0.0610556	0.052857	0.00412569	0.0346122	0.772845	0.829606	1	0.733269
FBtr0113204	CG7900	2	0.100033	0	0.131329	0.0342734	0.692932	0.617283	0.0472787	0.0416531	0.0441924	0.898858	0.859953	0.800048	0.671798	1
FBtr0113215	CG14688	3	0.0789624	0.0314602	0.137939	0.182169	0	0.824613	0.986708	0.942024	0.986924	0.980377	1	0.818287	0.8479	0.917303
FBtr0113240;FBtr0334631;FBtr0113239	CG6118	4	0	0.00944992	0.0428179	0.00964379	0.080966	0.0266773	0.0754389	0.0431815	0.0419416	0.0566654	0.417491	0.808501	0.703186	1
FBtr0339264;FBtr0305050;FBtr0113297	CG6051	5	0.106541	0.0256549	0.133886	0.877599	0.856137	1	0.977322	0.103878	0	0.139048	0.137901	0.0899741	0.131565	0.0900826
FBtr0113388;FBtr0113386;FBtr0084927;FBtr0113384;FBtr0113387;FBtr0336451;FBtr0084928;FBtr0336452	LpR2	4	1	0.906912	0.785908	0.531145	0.530657	0.466453	0.413848	0.573833	0.532212	0.479251	0	0.0451224	0.0328859	0.017366
FBtr0302849;FBtr0113692;FBtr0302848;FBtr0113694;FBtr0302850;FBtr0113687;FBtr0302846	Gfat1	4	0.0783744	0.0438447	0	0.0076051	0.00401697	0.00691049	0.0357075	0.0152203	0.0348827	0.00633094	0.785686	0.776878	0.711794	1
FBtr0333380;FBtr0301804;FBtr0301803;FBtr0301802;FBtr0301797;FBtr0113813	CG40160	5	1	0.710614	0.695827	0.556492	0.521212	0.59289	0.595724	0.503915	0	0.000579506	0.642782	0.51636	0.753493	0.666406
FBtr0332950;FBtr0301636;FBtr0114364;FBtr0114365	jing	2	0.120705	0	0.0998163	0.0723234	0.0508345	0.107059	1	0.909129	0.818169	0.741782	0.752239	0.721098	0.0871754	0.0649426
FBtr0344703;FBtr0331591;FBtr0308070;FBtr0114452;FBtr0331594;FBtr0114451;FBtr0344702	CG10353	4	0.922875	0.710677	0.0614951	0.0448165	0.115424	0	0.0339335	0.00132639	0.0523051	0.90182	0.864521	1	0.779924	0.953061
FBtr0332982;FBtr0114509	CG11593	2	0.120908	0.0871745	0.0908759	0.14548	0.78257	0.718758	0.977747	1	0.0222145	0.0906354	0.116519	0.132432	0.116515	0
FBtr0344861;FBtr0344860;FBtr0331674;FBtr0300183;FBtr0114550	pes	1	1	0.765065	0.526489	0.418596	0.373927	0.413009	0.390524	0.384892	0.391598	0.0570617	0.025739	0.027451	0.0205953	0
FBtr0340547;FBtr0273268	CG5180	6	0.035756	0	0.0339754	0.724514	0.746074	0.931658	0.839566	1	0.87116	0.983988	0.859338	0.986947	0.90795	0.905315
FBtr0273301	CG6026	4	0.0653403	0.0645734	0.095471	0.0461995	0.120602	0.0986703	0	0.0958503	0.0889481	0.0765432	0.0594974	0.803465	1	0.926976
FBtr0340002;FBtr0273307	CG12964	4	0.101539	0	0.00940447	0.0528206	0.0686895	0.0527965	0.0573657	0.0739616	0.0520571	0.0743411	0.0472016	0.0597297	0.0359992	1
FBtr0273367;FBtr0273368	CG7504	6	0	0.0775569	1	0.862151	0.904782	0.773155	0.520418	0.686266	0.847999	0.829737	0.692994	0.816512	0.849275	0.821985
FBtr0305911;FBtr0289953;FBtr0305910	alpha-Est10	4	0.900835	0.843639	0.827102	0.0247268	0.0669381	0.119067	0.0231672	0.0468211	0.139334	0.0237502	0.0817694	0.108886	0	1
FBtr0290016;FBtr0070084;FBtr0290017	svr	1	1	0.984815	0.933733	0.855177	0.788177	0.757646	0.113886	0	0.0649724	0.0424664	0.0993224	0.0216023	0.0774867	0.104501
FBtr0343596;FBtr0290021	CG5321	4	0.106251	0	0.0387273	0.0480274	0.145971	0.0749174	0.0219994	0.0161856	0.00874896	0.0710737	0.684569	0.649165	0.80968	1
FBtr0345147;FBtr0333847;FBtr0333846;FBtr0290044	CG9449	5	0.894624	0.767133	0.673437	0.0505046	0.0190661	0	0.0217089	0.00670101	0.893	0.852624	1	0.939335	0.890913	0.737197
FBtr0343571;FBtr0290069;FBtr0074276	hang	6	0	0.189366	0.900243	0.955578	1	0.955914	0.976245	0.937034	0.942144	0.956687	0.947516	0.919696	0.932659	0.864198
FBtr0290134	CG42232	6	0	0.0461354	0.771321	0.926869	0.910865	0.968494	0.96435	1	0.979683	0.893377	0.907874	0.824335	0.910548	0.750754
FBtr0290212;FBtr0332176;FBtr0332175	CG1024	6	0	0.00225858	0.779913	0.905168	0.909222	0.952677	0.953149	0.903387	0.981937	1	0.934792	0.955303	0.912988	0.904392
FBtr0309372;FBtr0290258;FBtr0290256	yki	2	0	0.129091	0.0247484	0.0366793	0.104095	0.0863426	0.0902685	0.0438178	0.785332	0.832346	1	0.894428	0.808311	0.783248
FBtr0344864;FBtr0290281	slam	1	0.381063	0.5004	0.91692	0.808798	1	0.332522	0.500995	0.0179974	0.00740084	0.026558	0.00645176	0.00235673	0	0.0408517
FBtr0346452;FBtr0290322	cup	1	1	0.952986	0.880312	0.452925	0.347052	0.229964	0.0715703	0.112919	0.250477	0.0172689	0.0164601	0	0.0157388	0.179526
FBtr0299640;FBtr0333375;FBtr0333374;FBtr0299641	corn	6	0.0876351	0	0.062641	0.0637967	0.644315	0.827449	0.815237	0.899418	0.963731	0.82133	0.865248	0.728745	1	0.729562
FBtr0299658;FBtr0300523;FBtr0346622;FBtr0300521	bun	5	0	0.00832971	0.0450095	0.048502	0.110447	0.0578879	0.0625578	0.0377164	0.836634	0.965267	1	0.953987	0.913807	0.895391
FBtr0344996;FBtr0299696;FBtr0343338;FBtr0299697	Mlp60A	4	0.00367481	0.0393781	0.0441887	0.047019	0.0600174	0.0508927	0.0431113	0.038735	0	0.0243808	0.513383	0.748293	0.883477	1
FBtr0300549;FBtr0300548;FBtr0300547;FBtr0299728;FBtr0300546;FBtr0335449;FBtr0299729	Csk	3	0	0.0129714	0.0810672	0.816417	1	0.796326	0.766653	0.894782	0.919243	0.827955	0.826545	0.84192	0.847153	0.861429
FBtr0299789	CG42327	4	1	0.86605	0.0458595	0.0933324	0	0.0121629	0.0298915	0.0389788	0.0148663	0.0244888	0.0229785	0.0828568	0.0540889	0.12934
FBtr0299882;FBtr0299881;FBtr0299880;FBtr0301725	AGO3	2	0.662037	0.795652	1	0.850583	0.855477	0.82502	0.743165	0.626889	0.0635009	0.03123	0.0173852	0.0172485	0.0262056	0
FBtr0310315;FBtr0310314;FBtr0299951;FBtr0299950;FBtr0299949;FBtr0310316	CG42354	1	0.492601	0.748289	1	0.84873	0.838064	0.608213	0.577528	0.0905931	0.0636862	0.0641643	0.00524233	0.0928768	0.0665049	0
FBtr0299959	CG42360	6	0.03948	0.0156628	0	0.924187	0.847104	0.863212	0.871221	0.846957	0.893655	1	0.814097	0.842098	0.951263	0.90565
FBtr0302907;FBtr0300000;FBtr0343357;FBtr0300001;FBtr0302906;FBtr0302905	CG42388	1	1	0.848701	0.787585	0.439414	0.4531	0.190264	0.253279	0	0.0684275	0.0296404	0.0404576	0.0337005	0.0262044	0.058
FBtr0300100;FBtr0344966;FBtr0273362	Sug	2	1	0.843885	0.757805	0.70366	0.765961	0.785329	0.0376472	0	0.0456793	0.0824119	0.818325	0.727846	0.567104	0.761885
FBtr0331306;FBtr0331738;FBtr0331305;FBtr0300106;FBtr0331737	oc	2	0.0326741	0.0274551	0.0821884	0.0416965	0	0.0130506	0.0224481	0.0288483	0.0333319	0.765928	1	0.922112	0.879062	0.921822
FBtr0300277;FBtr0300276	CG6967	1	0.975373	1	0.0703305	0.0417138	0	0.0290445	0.0162397	0.0535517	0.0562302	0.0398788	0.0196934	0.0207275	0.0175168	0.0401752
FBtr0300278	CG7091	1	1	0.819985	0.715951	0.00175679	0.0118238	0.00765093	0.0107048	0.017246	0.00289982	0.0329266	0.0323606	0.0175231	0	0.0662192
FBtr0332323;FBtr0332322;FBtr0300341	kon	5	0.00554566	0	0.00173057	0.0234254	0.0401059	0.0517436	0.0526016	0.0679313	0.829423	0.902884	0.883714	1	0.912559	0.865484
FBtr0335133;FBtr0300382	Duox	1	1	0.856269	0.578547	0.270743	0.270838	0.148216	0.0926417	0.0107538	0.118847	0	0.29138	0.231816	0.214308	0.349619
FBtr0300439	CG42487	2	0.139597	0.128835	0.0426948	0.0582548	0.0999518	0.0604976	0.097969	0.119092	0.143358	0	0.856981	0.908799	0.892579	1
FBtr0300453	CG32638	6	0.0518493	0.0734444	0	0.715385	0.818949	0.918118	0.90156	0.882476	0.928355	0.918128	0.989374	0.959553	1	0.999149
FBtr0300519;FBtr0299648;FBtr0331843;FBtr0299645;FBtr0299646	Nedd4	1	1	0.828013	0.856206	0.0425785	0	0.0371421	0.00871657	0.054648	0.0685322	0.0233304	0.0778701	0.0846342	0.044301	0.0537433
FBtr0300525;FBtr0334912;FBtr0334911;FBtr0299709;FBtr0334910	cno	6	0	0.70632	0.847791	0.931819	0.998333	0.98227	0.995413	0.994928	1	0.954561	0.887134	0.794615	0.918096	0.829163
FBtr0300539;FBtr0300538;FBtr0299706;FBtr0345791;FBtr0299705;FBtr0306625;FBtr0300541;FBtr0299707	grh	3	0	0.0166009	0.00549566	0.705694	0.564025	0.66335	0.680733	0.810686	0.917179	0.910353	0.99441	1	0.971777	0.974994
FBtr0300597;FBtr0300596;FBtr0340016	ATPCL	3	0	0.101007	0.0477033	0.70646	0.833056	0.815552	0.868666	0.864396	0.923887	0.900419	0.933307	0.844826	0.918934	1
FBtr0300611;FBtr0334906	betaTub97EF	4	0.0339995	0.0474111	0.0233869	0.00578115	0.145202	0.0349175	0	0.067055	0.0497325	0.0486331	0.669795	0.781379	0.827033	1
FBtr0300775	CG1319	3	0.0281339	0.0211838	0	0.780604	0.841052	0.845142	0.79205	0.801743	0.783004	0.874537	0.863924	0.841235	0.779439	1
FBtr0331562;FBtr0300903	CG18586	1	0.89444	0.808652	0.837009	0.860502	0.879408	1	0.828914	0.0138592	0.0988425	0.0516819	0.0541268	0	0.0446221	0.129988
FBtr0300998	CG4041	2	0.0542341	0	0.0685452	0.0518577	0.036548	0.0398896	0.0455873	0.0630575	0.895243	0.902676	1	0.827745	0.0709471	0.0424359
FBtr0301073;FBtr0110888;FBtr0335004	CG34133	2	0.0770383	0	0.142643	0.0927485	0.0453936	0.138675	1	0.876372	0.725992	0.835957	0.880444	0.680324	0.890632	0.931144
FBtr0333391;FBtr0301160	CG11307	6	0.0646297	0.0467467	0.955746	0.935447	0.820256	1	0.986705	0.899489	0.916529	0.126377	0	0.809289	0.834833	0.714746
FBtr0332039;FBtr0332038;FBtr0301236;FBtr0301235;FBtr0301234	CG9171	5	0.00468862	0.0104819	0.0347821	0	0.00636358	0.0277	0.0511335	0.00447949	0.774501	0.899889	0.952004	0.923694	0.994024	1
FBtr0309030;FBtr0301241;FBtr0301240;FBtr0339815	CG9650	2	0.059298	0.0434415	0.0422366	0.0468098	0.0442167	0.0453084	0.0792591	0	0.9907	0.969217	1	0.993332	0.927196	0.972385
FBtr0335247;FBtr0301390	dsd	2	0.0918615	0.0456019	0	0.0960212	0.138091	0.128002	0.114231	0.161658	0.0840124	0.958821	0.864629	0.976216	0.897327	1
FBtr0301426	KP78a	6	0.00967443	0	0.110617	0.845451	0.833723	0.924236	0.984107	1	0.993743	0.935401	0.752214	0.635921	0.756047	0.71509
FBtr0301431;FBtr0301429;FBtr0301430;FBtr0301428	MCPH1	2	0.920506	0.898671	0.948727	0.88399	0.96407	1	0.785851	0.879386	0.0513591	0.0929236	0.0989766	0	0.0737432	0.051593
FBtr0333219;FBtr0301492	olf413	5	0.0503663	0.0602439	0.0216167	0.0572987	0.0582002	0	0.0489606	0.0258363	0.727094	0.813706	0.79422	0.83341	1	0.830542
FBtr0301590	Spindly	2	0	0.612744	0.982313	0.957964	0.933733	0.916118	0.970977	1	0.899786	0.681615	0.0258909	0.0270958	0.0176355	0.0121171
FBtr0301838;FBtr0301837;FBtr0301839;FBtr0300337	Ppn	5	0.0316366	0.0146572	0.0243084	0.0322543	0.0265854	0	0.046445	0.417062	0.56843	0.574324	0.847291	0.875938	0.883803	1
FBtr0302084	lbk	3	0.0718154	0.0772014	0	0.060265	0.100289	0.0703984	0.904907	0.94276	1	0.915918	0.92787	0.916971	0.784152	0.760965
FBtr0334763;FBtr0302612;FBtr0302120;FBtr0078037;FBtr0302121	drongo	6	0.0953539	0	0.11717	1	0.89811	0.899427	0.986477	0.985549	0.923788	0.916881	0.854665	0.948646	0.770531	0.148404
FBtr0302133	CG16734	2	0.0689744	0.797298	0.910779	0.853074	0.773848	1	0.867863	0.746579	0.839953	0.838993	0.0648202	0	0.798906	0.119009
FBtr0302548;FBtr0076873;FBtr0076872;FBtr0302547;FBtr0302546	Sh3beta	6	0.082756	0.101497	0	0.0891998	0.85056	0.843472	0.913567	0.895671	0.902795	0.976816	1	0.987408	0.982732	0.996906
FBtr0302576	yellow-e2	5	0.0567966	0.0217785	0.0251433	0.067734	0	0.0110244	0.00969344	0.0186629	1	0.777671	0.913508	0.908172	0.834768	0.00750832
FBtr0303125;FBtr0303114;FBtr0303113;FBtr0303117;FBtr0303121;FBtr0303123;FBtr0303111;FBtr0303112;FBtr0334060;FBtr0303115;FBtr0344223;FBtr0303124;FBtr0344224;FBtr0344222;FBtr0303118;FBtr0303122	Ank2	4	0.015694	0.0107695	0.0553938	0.017455	0	0.0691292	0.0163809	0.0354522	0.0607422	0.0506602	0.554005	0.609099	0.71346	1
FBtr0332540;FBtr0303236;FBtr0303235	CG6136	6	0.0147655	0	0.00167634	0.825637	0.76713	0.838007	0.831753	0.786162	0.976504	0.914727	0.880037	0.940733	1	0.896429
FBtr0333047;FBtr0303749;FBtr0303750;FBtr0330145	dikar	2	0.0648641	0.0286644	0.0734377	0.0944133	0.0619491	0.129283	0.0258081	0.105387	1	0.85773	0.874978	0.0368207	0	0.103703
FBtr0303934;FBtr0303933;FBtr0307047;FBtr0303935;FBtr0077878;FBtr0077877	chinmo	4	0.0555724	0.0352501	0.0283421	0.031857	0.050147	0.0492431	0.0533857	0.0228576	0	0.0363058	0.658037	0.676548	0.776948	1
FBtr0304607;FBtr0304605;FBtr0304606;FBtr0304603;FBtr0304608;FBtr0304604	pros	2	0.108374	0.0528774	0.112734	0.0784295	0.091402	0.121878	0.0699626	0.790304	0.995628	1	0.908206	0.0397783	0.0960974	0
FBtr0304718	CG11839	6	0	0.00800848	1	0.76171	0.762785	0.807083	0.74779	0.803281	0.781954	0.723048	0.807893	0.812044	0.824336	0.813299
FBtr0304729;FBtr0084459	mbc	6	0.00322305	0	0.0299222	0.674036	0.697219	0.772915	0.887404	0.873701	0.954953	0.924859	1	0.943403	0.946271	0.891173
FBtr0332472;FBtr0304854	vas	2	1	0.94656	0.862103	0.77633	0.761202	0.721897	0.666077	0.585448	0.449248	0.386508	0.0968929	0	0.280708	0.220818
FBtr0304996;FBtr0304993;FBtr0333948;FBtr0304998;FBtr0304999;FBtr0304995;FBtr0304997;FBtr0304994	Ect4	4	0.0390924	0.0614732	0.110198	0.0634771	0.0450831	0.0333765	0	0.0312597	0.0564641	0.0161838	0.889188	0.941586	0.929022	1
FBtr0337062;FBtr0305130	CG4009	1	1	0.844875	0.653302	0.0252041	0.0317824	0.0665691	0.0597492	0.0684634	0	0.0431078	0.0625491	0.0224126	0.0679491	0.0108062
FBtr0305297;FBtr0310205	pyd	6	0.0939246	0.113902	0	0.770117	0.884764	0.82893	0.915413	1	0.891737	0.956978	0.943019	0.882318	0.844861	0.891388
FBtr0333944;FBtr0333945;FBtr0333941;FBtr0333947;FBtr0305977;FBtr0333942;FBtr0333943;FBtr0333939;FBtr0305979;FBtr0333946;FBtr0333940;FBtr0099993	cp309	3	0.0478486	0.00220195	0	0.93404	0.887786	0.965701	0.932366	0.84479	0.873853	0.945107	1	0.980698	0.963292	0.919576
FBtr0306010;FBtr0306009	ash1	2	0.190136	0.196815	0.0736396	0.140543	0.18071	0	0.119631	1	0.863453	0.846862	0.947325	0.980082	0.10468	0.131549
FBtr0306111;FBtr0088553;FBtr0088552	wun	5	0.864796	0.886319	0.859099	1	0.856955	0.756886	0.760836	0.754775	0.718277	0.658567	0.0392293	0	0.67946	0.779258
FBtr0306138;FBtr0080197	l(2)gd1	1	0.954212	0.832365	0.784576	1	0.859609	0.912127	0.915725	0.140978	0	0.159014	0.104349	0.13858	0.172476	0.14688
FBtr0306232;FBtr0306229;FBtr0306228;FBtr0306230;FBtr0306233;FBtr0306231	milt	1	0.817707	1	0.712256	0.704943	0.654598	0.523099	0.131463	0.0647035	0.0692728	0.0588867	0.087023	0	0.0610343	0.0768297
FBtr0306563;FBtr0306562;FBtr0306561;FBtr0306560;FBtr0306559	Ptpmeg	6	0.00120956	0	0.107428	0.797873	0.820958	0.925091	0.943507	0.93068	0.92615	1	0.967226	0.901472	0.927307	0.855021
FBtr0306620;FBtr0306619;FBtr0100040;FBtr0100039;FBtr0306624;FBtr0100042;FBtr0100041;FBtr0307191;FBtr0100044;FBtr0100043;FBtr0306623;FBtr0306622	nuf	5	0.0556907	0.091411	0.0386937	0.870748	0.830161	0.789448	0.722464	0.764248	1	0.0297069	0.0708045	0	0.036579	0.0226033
FBtr0306644;FBtr0306643;FBtr0083031;FBtr0083033;FBtr0334928;FBtr0302146;FBtr0302142;FBtr0302145;FBtr0302144;FBtr0083034	Mf	4	0.0834619	0.123645	0.148977	0.114947	0.0976015	0.155668	0	0.112292	0.138205	0.138763	0.111099	0.78639	0.871171	1
FBtr0306686;FBtr0085662;FBtr0302110;FBtr0085663;FBtr0302112;FBtr0085661;FBtr0306687;FBtr0302600;FBtr0336446;FBtr0302601;FBtr0302111;FBtr0085660;FBtr0085659;FBtr0085658;FBtr0306685;FBtr0336447;FBtr0113483	tmod	3	0.417063	0.0397636	0	0.469601	0.476687	0.611648	0.624546	0.726817	0.760524	0.846032	0.897971	0.938684	0.864593	1
FBtr0307305;FBtr0307304;FBtr0307302;FBtr0307301;FBtr0332096;FBtr0330149;FBtr0330148;FBtr0307306	BtbVII	2	0.0705686	0	0.0753865	0.165561	0.0833825	0.0587308	0.0312285	0.864833	0.882282	0.926883	0.966438	1	0.921958	0.986983
FBtr0307887;FBtr0307888	CG32106	1	0.959181	1	0.937481	0.0521811	0.081529	0.00125556	0.0695492	0.0625307	0	0.0398258	0.0692782	0.00195038	0.03092	0.0562575
FBtr0309110;FBtr0309109;FBtr0309106;FBtr0340491;FBtr0309112;FBtr0309102;FBtr0309111;FBtr0309108;FBtr0309104	hts	5	0.0353167	0.141347	0.100689	0.0779932	0	0.0529636	0.0146541	0.0319682	0.62799	0.664773	0.829863	0.874905	0.925116	1
FBtr0309202;FBtr0084000;FBtr0083999;FBtr0083998;FBtr0344316;FBtr0309204;FBtr0309203;FBtr0309205;FBtr0344317	Calx	5	1	0.722449	0.513095	0.604014	0.643965	0.590853	0.628841	0.676925	0.715589	0.627059	0.560421	0.531512	0	0.0450961
FBtr0310148;FBtr0300369;FBtr0339285;FBtr0310147	CG13742	2	0.0984663	0.184781	0	0.0920094	0.139556	0.125454	0.134353	0.0684194	0.823885	0.840116	1	0.0808266	0.116659	0.232648
FBtr0310323	CG13185	2	0.265042	0.392864	0.406312	0.0952452	0	0.261958	0.449658	0.368975	0.702724	0.632394	0.902006	0.906409	0.964453	1
FBtr0310379	Rpb4	6	0.0686487	0.111536	0	0.828309	0.758246	0.800946	0.836482	0.793856	0.886235	0.817811	0.930204	1	0.863291	0.891599
FBtr0310385	Su(var)3-9	6	0.020113	0	0.00884613	0.838265	0.782977	0.963101	0.987555	1	0.889905	0.880178	0.776139	0.805267	0.675401	0.736554
FBtr0310440	CG34422	6	0.124233	0.101662	0	0.806653	0.826617	0.801233	0.849463	0.860736	0.897842	0.906421	0.944245	0.938406	0.939664	1
FBtr0330190;FBtr0330189;FBtr0305084;FBtr0305086;FBtr0333625;FBtr0333626;FBtr0305085;FBtr0075318	Dab	6	0.0321309	0.021913	0.0598056	0	0.634195	1	0.740487	0.737694	0.861952	0.774295	0.781188	0.677629	0.723457	0.622613
FBtr0330280;FBtr0330279;FBtr0330278;FBtr0330276;FBtr0330269;FBtr0330277;FBtr0330275;FBtr0330270;FBtr0330273;FBtr0330272;FBtr0330271;FBtr0330274	cpo	5	0.0269202	0.0427745	0	0.0289829	0.0672798	0.0406824	0.0343335	0.0457546	0.52505	0.601401	0.846312	0.920968	0.871072	1
FBtr0330734;FBtr0330733;FBtr0330731;FBtr0330730;FBtr0330732;FBtr0330729	sli	3	0.00863427	0	0.021552	0.797374	0.761896	0.758601	0.881858	0.961955	0.873468	0.869636	0.946049	0.962697	1	0.960407
FBtr0346586;FBtr0331677	CG8677	6	0	0.0671027	0.606013	0.653473	0.593279	0.66627	0.65253	0.67065	0.852762	0.86817	0.940842	0.979293	0.949413	1
FBtr0332344;FBtr0332348;FBtr0332346;FBtr0332345;FBtr0305142;FBtr0305141;FBtr0332347;FBtr0332355;FBtr0332350;FBtr0332349;FBtr0332343;FBtr0332352;FBtr0332354;FBtr0332351;FBtr0332353;FBtr0305145	dp	4	0.13249	0.0763058	0.0562151	0.10891	0	0.0469078	0.0775043	0.0613349	0.0739292	0.0348568	0.925439	0.839069	0.889066	1
FBtr0332394;FBtr0332393	CG8028	5	0	0.117614	0.126547	0.0993612	0.0376318	0.00573357	0.106476	0.0874123	0.955128	0.998851	1	0.853822	0.981602	0.0275332
FBtr0332562;FBtr0332560;FBtr0332557;FBtr0332558	ab	5	0	0.00846565	0.00947417	0.0737745	0.020919	0.00467762	0.00465733	0.595909	0.772102	0.838192	0.980674	1	0.898115	0.957892
FBtr0332632;FBtr0332631;FBtr0332630	CG17493	6	0	0.0195145	0.0192551	0.872087	0.914078	0.862517	0.930179	0.951149	1	0.923977	0.975506	0.96399	0.949873	0.87329
FBtr0332636;FBtr0332641;FBtr0332637;FBtr0332642	tral	1	1	0.961623	0.907482	0.00942941	0.056891	0.0305154	0.0225191	0.03997	0.00608852	0	0.0410842	0.0180194	0.0420615	0.0282633
FBtr0333172;FBtr0333171;FBtr0333170	CG9380	4	0.00016488	0.088331	0.0713177	0.0196024	0.0334204	0	0.0314294	0.0362389	0.0262719	0.0194859	0.0251155	0.792788	0.719765	1
FBtr0333337;FBtr0333340;FBtr0333345;FBtr0333344;FBtr0333342;FBtr0333343;FBtr0333341;FBtr0333338;FBtr0333339	Hr4	5	0.0236339	0	0.0429318	0.0462942	0.0684456	0.0544537	0.0678024	0.0172413	0.0763596	0.0482072	0.782146	1	0.967822	0.984765
FBtr0333401;FBtr0072704;FBtr0072705;FBtr0333402;FBtr0072703	CG12090	5	0.970384	0.916697	0.895562	0.952769	0.940931	0.944797	0.924872	0.934151	0.100145	0.0386776	1	0.996199	0.96796	0
FBtr0333502;FBtr0333501;FBtr0333493;FBtr0333497;FBtr0333496;FBtr0333499;FBtr0333498;FBtr0345690;FBtr0333495;FBtr0333500;FBtr0333494;FBtr0345689;FBtr0333507;FBtr0333508;FBtr0333509;FBtr0333503;FBtr0333504	Glut1	4	1	0.926321	0.652758	0.515353	0.385136	0.426722	0.295434	0.428311	0.230814	0.0885833	0.0296848	0.0794425	0.0999207	0
FBtr0333712;FBtr0302322;FBtr0075078;FBtr0075077	CG3961	4	0.0507273	0.0671614	0.0288033	0.0547345	0.05826	0.0430441	0.090446	0	0.0482133	0.0773958	0.839042	0.863811	0.900338	1
FBtr0333767;FBtr0333766;FBtr0333765;FBtr0333768	Smr	6	0.0997267	0	0.88911	0.910699	0.959525	0.942127	0.978682	1	0.96996	0.865977	0.900647	0.856384	0.913198	0.86281
FBtr0333841;FBtr0333839;FBtr0333838;FBtr0333840;FBtr0333842;FBtr0075987	Ncc69	4	0.0794355	0.0344703	0.0996577	0.0857306	0.0543394	0.0857351	0.10432	0	0.0630346	0.502178	0.77568	0.815513	0.760392	1
FBtr0334287;FBtr0334286;FBtr0334292	btsz	3	0	0.0220802	0.0926247	0.994713	0.97394	0.95273	1	0.888703	0.806016	0.867613	0.82361	0.797992	0.831641	0.0815321
FBtr0334673;FBtr0334672;FBtr0081613;FBtr0081612;FBtr0334677	Alh	2	0.0769419	0.0783973	0.0825865	0.0762919	0	0.074568	0.0774326	0.0532695	0.677017	0.799963	0.896243	0.972542	0.999477	1
FBtr0334915	CG6475	2	0.0367507	0.070499	0.044339	0.0573108	0.100845	0.0556788	0	1	0.968462	0.912738	0.971447	0.946084	0.889135	0.816311
FBtr0335000;FBtr0078785	CG1161	1	0.90505	0.900595	1	0.0803225	0	0.0727442	0.0614971	0.0382512	0.0581272	0.0139424	0.800349	0.956327	0.938384	0.92012
FBtr0335432;FBtr0335431;FBtr0306344;FBtr0078942;FBtr0306343;FBtr0078941;FBtr0078939	CG31522	5	0.0482612	0.087043	0.111068	0.0843127	0	0.052555	0.0816217	0.0831489	0.0925184	0.684953	0.672312	0.765891	0.645892	1
FBtr0335514;FBtr0335512;FBtr0335513	koi	3	0.43519	0	0.0261819	0.571997	0.46645	0.571813	0.566691	0.620221	0.676873	0.738229	0.833685	0.931818	0.803463	1
FBtr0336649;FBtr0336651;FBtr0336650;FBtr0336652	Strn-Mlck	5	0.0433717	0.0522794	0.0731556	0	0.0992705	0.0830753	0.04655	0.783796	1	0.995247	0.607564	0.694643	0.737279	0.0974627
FBtr0336673;FBtr0336675;FBtr0345068;FBtr0303206;FBtr0345069;FBtr0336676;FBtr0301324;FBtr0112707	CG34417	5	0.00753915	0.00599142	0	0.500183	0.48025	0.470286	0.47281	1	0.651543	0.860544	0.746762	0.776587	0.777915	0.883592
FBtr0336811;FBtr0336809	Cdep	5	0.0297384	0.00533257	0.111342	0.00499567	0	0.0373559	0.685263	0.806318	0.777988	0.869856	0.950436	0.936933	0.865835	1
FBtr0336819;FBtr0081223	fon	4	0.986814	0.996491	1	0.850755	0.670152	0.737912	0.609963	0.717768	0.881676	0.737364	0.0400016	0	0.0286485	0.0171139
FBtr0339090;FBtr0339089;FBtr0339088;FBtr0339092;FBtr0339091;FBtr0339093	Glycogenin	3	0.00824987	0	0.0326422	0.6378	0.727285	0.616789	0.764295	0.826324	0.808947	0.893512	0.908946	0.881226	1	0.65493
FBtr0339160;FBtr0339161;FBtr0084937;FBtr0084936;FBtr0084935;FBtr0339162	Lnk	6	0.122761	0.100731	0	0.86102	0.906769	0.904242	0.87963	0.850883	0.910234	0.972139	1	0.924347	0.861731	0.90516
FBtr0339715;FBtr0339714	CG2943	1	0	1	0.905892	0.0592307	0.0384523	0.065729	0.0925832	0.0473906	0.046221	0.059172	0.0434879	0.0373957	0.0603251	0.0119941
FBtr0339824;FBtr0113453;FBtr0333145;FBtr0113452;FBtr0333144;FBtr0113455;FBtr0113454;FBtr0113451	CG33181	1	0.979097	0.941833	1	0.0896258	0.140119	0.104173	0.148412	0.195825	0	0.123038	0.129397	0.106279	0.0772022	0.0510264
FBtr0340204;FBtr0340206;FBtr0340205;FBtr0340203	yin	1	1	0.76605	0.4864	0.0636429	0.0619428	0.0574902	0.0478506	0.0498614	0.0801105	0.0396807	0.0362669	0.0496022	0.0318499	0
FBtr0340271	CG30109	5	0.0652528	0.0430839	0	1	0.683022	0.731299	0.695997	0.0136855	0.0427248	0.772332	0.704943	0.784539	0.780461	0.840918
FBtr0342818;FBtr0342826;FBtr0342811;FBtr0342815;FBtr0342814;FBtr0342809;FBtr0342812;FBtr0342822;FBtr0342817;FBtr0342813;FBtr0342816;FBtr0342808;FBtr0342806;FBtr0342820;FBtr0342819;FBtr0342824;FBtr0342821;FBtr0342825;FBtr0342810;FBtr0342805;FBtr0342807;FBtr0342823	trol	4	0.294501	0.00697064	0.103448	0.0519509	0.0119782	0.0295497	0.0137752	0.0028552	0.0346204	0	0.227919	0.290137	0.679578	1
FBtr0344437;FBtr0344438	Kr-h1	5	0.0973063	0	0.0384242	0.0575081	0.109876	0.115978	0.072872	0.0451956	0.0417706	0.0712817	1	0.996145	0.980485	0.999458
FBtr0344444	fau	4	0.05963	0.0517895	0	0.0743571	0.0319504	0.075231	0.0382814	0.118149	0.0524258	0.0434611	0.0279552	0.798852	0.900422	1
FBtr0344723	cn	2	0	0.0300714	0.0410766	0.0100443	0.000556093	0.0133998	0.395649	0.833516	0.91935	0.939896	1	0.927269	0.900865	0.834615
FBtr0344782;FBtr0081051;FBtr0340580;FBtr0081052;FBtr0112804	Fas3	5	0.047018	0.085927	0.0211638	0.0750188	0.0432082	0.0340287	0	0.0575222	0.506591	0.667999	0.883746	0.902715	0.873154	1
FBtr0344981;FBtr0076525;FBtr0344980	Tequila	4	0.996185	0.97766	1	0.0431263	0.0135046	0.0247828	0.0297053	0.100216	0.00152436	0.0558522	0	0.0297076	0.859394	0.692753
FBtr0345020;FBtr0345019	CG1667	2	0.00763952	0.913604	0.962858	1	0.998481	0.993289	0.635543	0.648183	0.0635561	8.37554e-05	0.024598	0	0.0881051	0.0672707

## Sheet: rpkm
gene	cluster	embryos_0_2h	embryos_2_4h	embryos_4_6h	embryos_6_8h	embryos_8_10h	embryos_10_12h	embryos_12_14h	embryos_14_16h	embryos_16_18h	embryos_18_20h	embryos_20_22h	embryos_22_24h
CG9578	3	1	0.249583	0	0.0604684	0.193664	0.362021	0.342494	0.448539	0.382475	0.29943	0.310108	0.27065
alpha-Cat	6	0.4455	0.777535	0.954579	0.729579	0.786741	0.547829	1	0.120279	0.32752	0	0.376948	0.529637
G9a	2	1	0.255591	0.304748	0.253205	0.230192	0.0444363	0.319731	0.0970386	0.0573929	0	0.0575316	0.160203
CG3777	4	0	0.0140646	0.0201415	0.290294	0.497617	0.524128	0.539568	0.725094	1	0.851907	0.52517	0.538391
arg	4	0	0.0624645	0.143463	0.349587	0.510529	0.522437	0.527932	0.643329	0.740901	1	0.991503	0.962841
elav	3	0	0.445426	0.685614	0.920634	1	0.952605	0.954408	0.775146	0.67727	0.602588	0.491443	0.514257
Appl	4	0.0994967	0.0470613	0	0.144568	0.337559	0.62903	0.792814	0.873585	0.937827	0.954534	0.970608	1
CG13367	2	1	0.209768	0.628816	0.793848	0.604461	0.649537	0.416408	0.172884	0	0.202481	0.230243	0.0546275
Roc1a	6	0.640932	0.964454	1	0.877174	0.783447	0.697593	0.58774	0.250672	0.142001	0	0.000519185	0.0235676
CG5254	5	0.0794844	0	0.10709	0.592798	0.778373	0.948672	0.835984	0.769252	0.725439	0.693487	1	0.999077
CG13362	5	0	0.0611668	0.0723148	0.391674	0.530051	0.90114	1	0.851644	0.307828	0.189834	0.0572187	0.10729
CG13364	2	0.340704	0.79911	1	0.898795	0.954789	0.94462	0.737366	0	0.25539	0.111097	0.592913	0.567859
CG3021	1	1	0.953139	0.269021	0.2206	0.424593	0.559042	0.331785	0.267753	0.104164	0.0447491	0.0298953	0
su(w[a])	6	1	0.816656	0.781732	0.828983	0.683004	0.498306	0.540318	0.560695	0.370509	0.177877	0.0466834	0
CG14629	5	0	0.121681	0.201141	0.662193	0.808403	0.959483	0.963306	1	0.919809	0.799188	0.60292	0.596811
CG3699	4	0	0.152753	0.416537	0.453341	0.500118	0.611542	0.621907	0.801288	0.832472	0.901776	1	0.934375
CG11378	4	0	0.0769837	0.146293	0.377189	0.350514	0.293488	0.241197	0.500872	0.770954	0.879249	1	0.955669
CG11381	4	0	0.0186948	0.0637559	0.0307368	0.036777	0.0128824	0.0254354	0.0759763	0.281735	0.7404	1	0.986422
fs(1)N	1	1	0.257045	0.0661502	0.0364007	0.0846851	0.00282468	0.0431808	0.0625311	0.00831203	0	0.0275764	0.0239844
CG32813	5	0.17964	0.0259129	0	0.609488	0.871207	1	0.996413	0.969624	0.834233	0.770572	0.582629	0.558072
png	1	1	0.490271	0.303417	0.1939	0.172761	0.0815126	0.0606776	0.106502	0.0204393	0.0443299	0	0.0192748
pck	3	0.32111	0.453365	0.515621	0.840776	0.885518	1	0.884817	0.817646	0.539973	0.405129	0.0459323	0
CG14806	2	0.957423	0.557223	0	0.521256	0.647357	1	0.658206	0.364558	0.420189	0.378243	0.527644	0.309196
mip130	6	0.607318	0.892661	0.939526	1	0.884358	0.614751	0.520456	0.383951	0.180134	0	0.279269	0.022962
CG4194	2	0	0.392068	0.700283	0.889793	0.927501	1	0.914033	0.552195	0	0	0	0
usp	6	1	0.615946	0.62466	0.706524	0.693661	0.720875	0.692067	0	0	0	0	0
trr	6	1	0.952664	0.929172	0.997027	0.817605	0.378985	0.540481	0.537802	0.308446	0	0.369094	0.187464
CG14814	1	1	0.489558	0.502112	0.526258	0.435831	0.213207	0.182023	0.132798	0.0120764	0.0184365	0	0.0375726
CG14812	6	0.410127	0.685671	0.582254	0.634797	0.778736	0.964628	1	0.309873	0.131311	0	0.320565	0.502179
fs(1)K10	6	0.775681	1	0.776074	0.958604	0.896746	0.415501	0.717843	0.294534	0.323732	0	0.354079	0.388233
phl	2	1	0.871169	0.854888	0.68686	0.649522	0.379795	0.492059	0.255813	0.195646	0	0.340344	0.432143
kz	6	1	0.720334	0.790441	0.949226	0.908423	0.635085	0.534863	0.329729	0.138469	0	0.69531	0.565847
z	6	0.919472	0.913241	1	0.888355	0.806082	0.936305	0.655911	0.493433	0.270202	0.284638	0.0385288	0
egh	3	1	0.581296	0.304949	0.205647	0.328586	0	0.575123	0.615218	0.517334	0.276757	0.537519	0.703062
Tsp3A	2	0.646531	0.80909	0.69717	0.98505	0.942832	1	0.746131	0.732017	0.420839	0.210832	0.0328419	0
Klp3A	2	0.972168	0.699208	1	0.963659	0.815241	0.509256	0.37597	0.18218	0.0608129	0.0372864	0	0.0111336
sgg	2	0.185389	1	0.500953	0.54423	0.520284	0.304669	0.593536	0.333605	0.420962	0.0765638	0.107859	0
fs(1)Ya	1	1	0.353322	0.146364	0.0924626	0.109534	0.0444365	0.0296587	0.117525	0.00677554	0.0304768	0.0128018	0
CG2685	6	1	0.982703	0.751988	0.777789	0.705163	0.577686	0.426881	0.360705	0.204198	0.0971928	0	0.0530728
Csat	5	1	0.329701	0	0.277256	0.417182	0.852002	0.828672	0.715847	0.49237	0.329488	0.305791	0.278001
CG3939	3	1	0.125873	0	0.265013	0.464308	0.804009	0.807247	0.720647	0.713916	0.673003	0.78481	0.74979
Fcp3C	4	0	0.0493187	0.202274	0.257178	0.805326	0.995259	0.699317	0.823464	1	0.605907	0.840343	0.8372
rst	5	0	0.411057	0.788032	0.918619	1	0.989643	0.981943	0.855427	0.724631	0.641801	0.463259	0.475234
Rala	2	1	0.243445	0.574209	0.279694	0.26609	0.234181	0.565181	0	0.203917	0.199432	0.330837	0.529755
CG2875	6	0.92235	0.799265	1	0.966836	0.985673	0.685597	0.97141	0.245602	0.177635	0	0.548662	0.71713
CG2930	5	0	0.281701	0.612858	0.422315	0.133108	0.125218	0.298434	0.64495	0.884511	1	0.971371	0.95794
CG15239	4	0.0246871	0	0.00466025	0.193146	0.265174	0.519967	0.695024	1	0.792507	0.364509	0.103928	0.127473
Fas2	3	0	0.264043	0.588104	0.896093	0.966278	0.894582	1	0.981101	0.879722	0.801957	0.69456	0.707419
Tip60	2	1	0.904415	0.805817	0.735695	0.723167	0.472012	0.470842	0.403701	0.286472	0	0.445464	0.465909
CG6379	2	0.646728	0.307177	0.890805	1	0.913373	0.974752	0.636144	0.338164	0.223264	0.209672	0	0.0166371
peb	5	0	0.295257	0.714977	1	0.911803	0.841979	0.822897	0.78005	0.603954	0.547076	0.482609	0.400303
pon	2	0.523413	0.504917	0.860005	1	0.894924	0.739462	0.554589	0.364654	0.189933	0.136071	0	0.0412437
rap	6	0.948956	0.614402	0.880589	0.973468	1	0.910398	0.823624	0.38071	0.136593	0.109994	0.0265817	0
CG6927	1	1	0.265455	0.126732	0.0561951	0.104738	0.0020174	0.0340795	0.089007	0.0140621	0.0168312	0	0.0128014
dhd	1	1	0.465201	0.384345	0.245153	0.280076	0.146981	0.159683	0.151491	0.0116064	0.0858061	0	0.0951602
Sas10	6	0.692356	1	0.768291	0.876292	0.831773	0.752957	0.46109	0.418916	0.187932	0	0.619137	0.355792
Mlc-c	3	0	0.629192	0.739188	0.729882	0.772508	1	0.822963	0.483538	0.434565	0.341408	0.478751	0.566245
CG4078	6	1	0.717123	0.744651	0.564996	0.535321	0.418366	0.27473	0.276681	0.158134	0	0.0567181	0.0828384
CG3108	4	0.0449354	0	0.0195449	0.152125	0.207427	0.256897	0.53973	1	0.749017	0.259512	0.00695023	0.0587647
CG3097	5	0	0.381521	0.645531	0.727146	0.741794	0.77954	0.810781	1	0.712527	0.540638	0.4732	0.501508
lin-52	6	1	0.660239	0.949452	0.89629	0.744106	0.684277	0.439105	0.182664	0.0873073	0	0.0899814	0.122563
CG3149	1	0.752097	0.483579	1	0.877706	0.66167	0.793776	0.215981	0.24741	0.0852392	0.0482243	0.0453039	0
Tre1	2	0.702375	0.292575	0.851529	0.93826	0.916666	1	0.865586	0.912111	0.689981	0.395648	0	0.00177077
Sirt4	4	0.799115	0	0.0959307	0.495595	0.463994	0.756608	0.599887	0.769877	0.67007	0.917865	1	0.965197
CG5966	1	1	0.362642	0.134877	0	0.373429	0.436939	0.596004	0.634448	0.512029	0.537899	0.388006	0.424157
sqh	3	0	0.478981	0.83156	1	0.964975	0.954431	0.622444	0.670599	0.521275	0.439986	0.310552	0.26899
swa	1	1	0.550389	0.200692	0.0595487	0.323318	0.243252	0.185461	0.279348	0.239885	0	0.259055	0.312028
Pat1	5	0.042534	0	0.857927	0.884279	0.863086	0.888237	1	0.659147	0.462431	0.398624	0.346551	0.497827
APC7	1	1	0.457039	0.198843	0.088301	0.11692	0.0303586	0.0435927	0.0587605	0.0066949	0.0162795	0	0.0188229
CG14438	6	0.932098	1	0.772334	0.676811	0.638537	0	0.46669	0.520548	0.408385	0.168094	0.740797	0.627597
CG14442	2	1	0.395845	0.193824	0.412605	0.292175	0.245058	0.190421	0.292129	0.146855	0.11718	0.0970788	0
CG3224	2	1	0.483154	0.534603	0.863354	0.922615	0.819136	0.730711	0.334402	0.105305	0	0.665996	0.588795
CG4617	2	1	0.328305	0.484021	0.606491	0.62711	0.556847	0.328956	0.305855	0.186636	0.00128735	0.344471	0
ogre	3	0	0.637959	0.985554	0.993193	1	0.932317	0.968129	0.770251	0.606612	0.530852	0.410479	0.45635
Rab39	6	0.494995	0.322004	1	0.614637	0.299455	0.231682	0.364955	0.28711	0.407008	0.180443	0	0.169443
CHES-1-like	5	0.65146	0	0.246641	0.715614	0.714327	0.717604	1	0.984112	0.839176	0.846254	0.981863	0.897196
CG1444	4	0.757396	0.399677	0	0.497248	0.689836	1	0.898225	0.859738	0.746293	0.704536	0.592018	0.602035
CG2258	2	1	0.944447	0.106028	0	0.303148	0.173454	0.305926	0.535524	0.421558	0.192292	0.704053	0.57579
CG2254	4	0	0.0671953	0.177696	0.494452	0.59717	0.806114	0.847407	1	0.938551	0.803559	0.739116	0.735922
fs(1)h	6	0.853295	1	0.819339	0.980905	0.744182	0.186511	0.412087	0.473393	0.241889	0.148097	0.134952	0
l(1)G0193	1	0.513226	1	0.488909	0.301827	0.705676	0.94834	0.716734	0.76125	0.438278	0	0.0629796	0.2564
l(1)G0193	1	0.513226	1	0.488909	0.301827	0.705676	0.94834	0.716734	0.76125	0.438278	0	0.0629796	0.2564
dec-1	4	0	0.0858595	0.0242648	0.254668	0.467308	0.114939	0.0750585	0.437104	0.802072	1	0.613593	0.759085
CG1575	3	1	0	0.389916	0.468339	0.52558	0.577483	0.320083	0.208862	0.089863	0.144186	0.569942	0.467643
CG2147	2	1	0.347064	0.197505	0.49403	0.550373	0.668667	0.544336	0.249863	0.154194	0.0419924	0.0495415	0
CG2260	6	0.745594	1	0.756619	0.811318	0.781278	0.694494	0.516879	0.467732	0.214004	0	0.555232	0.399618
Es2	2	1	0.555242	0.342617	0.426385	0.462402	0.488512	0.332697	0.27896	0.164299	0	0.19424	0.139012
Cp7Fb	4	0	0	0.0810557	0	0	0.170659	0.495366	1	0.891308	0.718629	0	0.445515
Cp7Fc	4	0	0	0.0666834	0.134408	0.0413356	0.123861	0.0754259	0.629109	0.621873	1	0.469027	0.378632
Cp36	4	0	0	0.390366	0	0	0	0	0.296778	0.554743	1	0.88209	0.273845
Cp38	4	0	0	0	0	0.150579	0	0	0.283746	0.251216	0.513277	1	0.336361
Nrg	5	0	0.259867	0.577325	0.850386	0.880471	0.869611	0.947319	1	0.968451	0.978892	0.86549	0.849135
CG12065	4	0.451249	0	0.00712038	0.255127	0.25842	0.488094	0.499317	0.718069	0.887202	1	0.893354	0.873066
CG15347	4	0.00618457	0	0.0288676	0.374272	0.536583	0.860181	0.891745	1	0.972755	0.951805	0.983138	0.966796
CG1785	6	0.934182	0.712437	0.942784	1	0.962014	0.752072	0.709331	0.213393	0.0747461	0	0.587641	0.54098
CG1789	2	0.761052	1	0.820721	0.706554	0.780198	0.646803	0.583416	0	0.070838	0.0601888	0.556569	0.511643
CG12075	4	0.00150291	0.00658907	0	0.248532	0.425057	0.676537	0.762741	1	0.811099	0.842346	0.628829	0.618607
e(r)	6	0.807971	1	0.676917	0.5314	0.62185	0.57156	0.604045	0.379645	0.306566	0	0.175105	0.286418
HP1b	6	0.749583	1	0.725479	0.706591	0.742085	0.717829	0.461028	0.336781	0.201951	0	0.481416	0.313977
CG32708	2	0.690334	0.898271	0.779635	0.808211	0.946972	1	0.626244	0.243965	0.13008	0	0.355846	0.251196
dalao	6	0.82041	1	0.700365	0.728101	0.632221	0.478402	0.379738	0.422019	0.209654	0	0.20263	0.0800169
CG12106	2	1	0.776202	0.0771991	0.478263	0.590005	0.682063	0.367525	0.312622	0.213058	0.0513242	0.1056	0
c12.1	6	0.506866	0.932229	1	0.830017	0.802224	0.830335	0.39059	0.291689	0.125781	0	0.329023	0.0675314
mxc	6	1	0.59867	0.668288	0.741825	0.606193	0.462371	0.410362	0.241821	0.140293	0.0378592	0	0.036556
su(r)	5	0	0.179682	0.427791	0.709472	0.658334	0.629408	0.525636	0.609801	0.777679	0.971747	1	0.965218
nej	6	0.925335	1	0.645918	0.68241	0.504179	0	0.288792	0.60889	0.411397	0.250847	0.74095	0.440215
CG3106	4	0	0.000756637	0.0106303	0.00671977	0.0405919	0.0858737	0.203305	0.546194	0.691721	0.816299	1	0.99878
CG32694	4	0.0247414	0.0234235	0	0.00139086	0.0715311	0.0554658	0.122043	0.558653	0.871126	1	0.645151	0.705079
Psf3	6	1	0.475295	0.863474	0.675854	0.548281	0.390653	0.263614	0.0545143	0.244956	0.106958	0	0.37269
Ipod	4	0.15959	0.0203089	0	0.112419	0.211038	0.267425	0.311202	0.942015	1	0.585263	0.224596	0.235426
CG2962	4	0.110797	0.0273001	0	0.0737543	0.196611	0.156969	0.309124	0.853117	1	0.898989	0.315366	0.342742
CG1628	5	0.215083	0	0.238288	0.539671	0.425575	0.395421	0.351986	0.510622	0.587719	0.726625	1	0.905842
Act57B	5	0.0050869	0	0.0281468	0.347663	0.499893	0.558059	0.662939	0.895372	0.967729	1	0.952491	0.947521
CG10543	5	0.643687	0.436554	0.290918	0.699964	0.585966	0.460086	0.766524	1	0.694623	0.480378	0.124325	0
Treh	5	0.658266	0.26739	0	0.114214	0.234113	0.544268	0.593066	0.531132	0.517346	0.921549	0.9776	1
CG15653	2	1	0	0.324793	0.314388	0.392133	0.723961	0.590352	0.428977	0.388059	0.312588	0.111728	0.183625
sktl	6	1	0.0506545	0.344238	0.323468	0.213976	0.273756	0.101769	0.0104828	0	0.109813	0.0804121	0.122012
tud	4	0.791785	0	0.505645	0.565293	0.664229	0.290743	1	0.828086	0.774503	0.630452	0.496591	0.737899
dom	6	0.887303	1	0.953431	0.936587	0.822464	0.270673	0.559456	0.470965	0.327595	0	0.557733	0.440037
Acox57D-d	1	1	0.35563	0.0531498	0	0.0172731	0.0389201	0.143212	0.371952	0.0884821	0.0265916	0.355442	0.311386
CG4302	5	0	0.174248	0.421015	0.391404	0.410415	0.445172	0.448164	0.343082	0.360424	0.610603	0.879451	1
CG4050	2	0.792405	0.522116	1	0.795753	0.652182	0.62522	0.466468	0.406516	0.245065	0.0691882	0	0.0513811
Sara	3	1	0	0.184772	0.400434	0.36826	0.267473	0.418321	0.230393	0.321864	0.341155	0.154628	0.256087
Egfr	3	0	0.843503	1	0.984061	0.865526	0.807228	0.847904	0.784416	0.71578	0.659643	0.486634	0.488937
NC2alpha	2	1	0.455822	0.630717	0.671256	0.574461	0.5781	0.358177	0.224267	0.138093	0.180536	0.0927945	0
Tbp	6	1	0.795641	0.799897	0.726275	0.595101	0.433827	0.434789	0.212109	0.08469	0.0139333	0.0166033	0
CG18870	1	1	0.573319	0.375462	0.367831	0.373696	0.353877	0.268103	0.197921	0.165357	0.149571	0	0.0640149
GlcT-1	5	1	0.152475	0	0.09203	0.11635	0.406491	0.405078	0.64103	0.668677	0.636878	0.3042	0.200102
ari-2	2	0.955582	0.723058	0.593077	0.922629	0.977898	1	0.931118	0.491147	0.358673	0.492936	0	0.0227877
Oatp58Dc	3	0	0.367046	0.749113	1	0.976851	0.814816	0.667935	0.233397	0.234447	0.364394	0.592839	0.638265
CG3045	2	1	0.86063	0.161333	0.156778	0.559568	0.591042	0.727278	0.303157	0.212183	0	0.612832	0.546569
Vrp1	5	0.684564	0.325385	0	0.42045	1	0.553418	0.522298	0.392936	0.362604	0.513073	0.700111	0.454224
Gp150	3	0	0.67426	0.99592	1	0.944558	0.835434	0.926945	0.855157	0.868336	0.817169	0.747867	0.786936
wrapper	5	0	0.0655519	0.137069	0.641496	0.793615	1	0.889969	0.807455	0.734973	0.65388	0.451563	0.424627
CG13506	4	0	0.035107	0.0550897	0.363551	0.548173	0.803655	0.894778	0.922916	0.985247	1	0.956907	0.995241
CG6018	4	0	0	0	0.634763	0.91913	1	0.924492	0.78672	0.778757	0.805846	0.721099	0.789994
px	2	0.755491	0.25316	1	0.923685	0.725101	0.709352	0.8371	0.833587	0.53533	0.591735	0.128162	0
T3dh	5	0	0.18911	0.535777	0.383474	0.315145	0.496128	0.476229	0.412492	0.612028	0.819824	1	0.937624
CG30272	5	0	0.34255	0.631395	0.836564	0.986761	1	0.861101	0.504301	0.368718	0.470711	0.758688	0.752897
Gmer	6	1	0.785352	0.672079	0.543684	0.494417	0.41136	0.419188	0.335204	0.212178	0.0298749	0	0.117349
CycB	2	1	0.806029	0.78221	0.700262	0.658011	0.454601	0.408095	0.417445	0.308204	0	0.417332	0.377951
Ugt58Fa	5	0	0.0148004	0.0687804	0.487426	0.620875	0.869409	0.975554	1	0.926412	0.763093	0.349107	0.400797
Cdk9	6	0.803773	1	0.834464	0.759569	0.705197	0.478741	0.516001	0.345679	0.167586	0	0.369705	0.282771
CG9849	2	1	0.895	0.51366	0.537975	0.588484	0.433166	0.399244	0.152235	0.031589	0.0144223	0	0.0568924
CG9890	2	0.992162	1	0.805025	0.686544	0.753971	0.670439	0.448542	0.242491	0	0.0181437	0.331072	0.263434
l(2)06496	6	0.705339	0.92191	0.762544	0.821864	0.917024	1	0.674226	0.250485	0	0.168723	0.187558	0.186847
CG3831	1	1	0.38106	0.115329	0.330268	0.455582	0.512914	0.566295	0.595223	0.379713	0.169182	0	0.0540404
vir	6	0.661948	1	0.996309	0.81832	0.694451	0.528267	0.447798	0.462759	0.225547	0.0610666	0.0458303	0
Pi3K59F	1	0.463571	0.211003	1	0.592952	0.394757	0.632027	0	0.202357	0.0593835	0.401823	0.47304	0.282274
retn	2	0.779701	1	0.59541	0.393287	0.398724	0.292912	0.314083	0.423755	0.285389	0	0.349148	0.312967
CG4091	2	1	0.555485	0.246964	0.0901497	0.343937	0.296926	0.591384	0.182913	0.130055	0	0.153764	0.322291
Alas	5	0.718185	0	0.355677	0.490989	0.473653	0.692192	0.654788	0.97085	0.933306	0.941841	0.881856	1
CG3065	2	1	0.314251	0.504868	0.895367	0.844518	0.77984	0.740595	0.349517	0.248058	0.239613	0.0146301	0
CG3163	6	0.668736	0.509994	0.853519	1	0.848779	0.792725	0.66249	0.371179	0.488487	0.307946	0	0.0723109
Phm	4	0.502334	0	0.234824	0.737585	0.92025	0.942253	0.975148	0.577893	0.681557	0.917273	0.889642	1
CG3735	6	0.947145	1	0.839743	0.774516	0.808851	0.453428	0.701734	0.295225	0.258618	0	0.754625	0.775617
Nxt1	6	0.773503	1	0.838478	0.719974	0.679772	0.589709	0.378785	0.246503	0.150745	0	0.231365	0.131494
enok	6	0.704366	1	0.842142	0.85713	0.765769	0.167443	0.469883	0.400872	0.193756	0	0.466092	0.317205
Zfrp8	6	0.348442	0.274378	1	0.994014	0.824297	0.813441	0.501096	0.286686	0.0396223	0	0.393444	0.313477
CG4049	2	1	0.711913	0.769216	0.687246	0.68454	0.400052	0.550103	0.34768	0.211033	0	0.0192868	0.0476408
CG3548	5	1	0.0631786	0	0.39158	0.736813	0.967714	0.782137	0.691715	0.623264	0.567522	0.403461	0.386211
CG4806	6	0.539089	0.918849	1	0.720151	0.813598	0.735637	0.688744	0.0875016	0.137298	0	0.516798	0.578524
CG4707	2	1	0.697848	0.743207	0.791017	0.830934	0.658342	0.4693	0.227156	0.0812079	0	0.00580958	0.0786176
CG4622	6	0.982353	1	0.857929	0.850299	0.788108	0.616811	0.572825	0.367288	0.299833	0	0.260683	0.348696
Eap	2	0.681088	0.777126	0.784438	1	0.985258	0.86055	0.772997	0.327521	0.237508	0	0.853456	0.72331
CG3589	1	1	0	0.317897	0.349729	0.22652	0.343211	0.190651	0.189026	0.190936	0.219027	0.181612	0.228073
CG3760	3	1	0	0.675742	0.857634	0.758306	0.905718	0.748258	0.659357	0.568132	0.520647	0.687721	0.520919
CG3829	5	0	0.250858	0.578348	0.921981	1	0.992848	0.949974	0.814358	0.899278	0.914033	0.829361	0.877795
uzip	5	0	0.26697	0.401781	0.534637	0.569222	0.646598	0.736335	0.474597	0.621445	0.67865	0.929465	1
emp	4	0	0.0929291	0.105116	0.245924	0.362751	0.617866	0.737938	0.906775	1	0.950068	0.70711	0.727087
CG2736	4	0	0.02478	0.0361625	0.00848009	0.0385052	0.140349	0.18062	0.553877	0.851034	0.963756	0.951327	1
mri	6	0.910569	0.905349	0.708087	0.93391	0.971484	1	0.6653	0.52522	0.326258	0.148942	0.0118716	0
miple2	5	0	0.377352	0.705014	0.924667	0.916396	0.921451	1	0.775829	0.731553	0.574392	0.327346	0.396009
DIP2	6	0.906402	0.70153	0.86724	0.674138	0.625671	0.296915	1	0.361873	0.421635	0	0.0970736	0.253161
E(bx)	2	1	0.835449	0.969046	0.973375	0.934392	0.328408	0.881564	0.299836	0.358937	0	0.459207	0.517469
Reg-2	5	0	0.113605	0.378898	0.734721	0.648031	0.812608	0.852106	0.819541	0.824558	1	0.932958	0.966338
CG32344	6	0.685212	0.761786	0.98764	1	0.875272	0.60042	0.54373	0.140849	0.0475614	0	0.529867	0.477032
CG13907	5	0.82173	0	0.519553	0.870799	0.843905	0.830941	0.90556	1	0.969241	0.854792	0.79721	0.775753
CG13901	6	1	0.874975	0.554605	0.70253	0.833932	0.880393	0.582903	0.553317	0.177004	0	0.163101	0.105425
CG9119	4	0	0.0462054	0.197636	0.531195	0.503903	0.601544	0.618356	0.708169	0.66684	0.892607	1	0.943281
bab2	5	0	0.380372	0.666251	0.947285	1	0.939385	0.989683	0.802052	0.707925	0.688563	0.674038	0.678087
trio	3	0.0369157	0.348345	0.0312352	0.0246086	0.106914	0	0.791164	0.202984	0.218399	0.0650193	0.854093	1
Myo61F	4	0.289026	0	0.00298995	0.125777	0.208557	0.466744	0.506225	0.596046	0.720932	0.882748	1	0.995751
l(3)02640	3	1	0	0.112563	0.49289	0.545363	0.641765	0.710486	0.891458	0.695161	0.649274	0.760229	0.736608
cue	1	1	0.681171	0.361389	0.269736	0.316267	0.110701	0.160693	0.169204	0	0.0517747	0.168365	0.159287
CG9184	5	0	0.0933351	0.0134962	0.468112	0.486595	0.951811	1	0.86543	0.385998	0.312962	0.0646357	0.10526
CG2277	6	0.860949	1	0.859195	0.680457	0.618305	0.943835	0.415863	0.190946	0	0.00225968	0.0293224	0.167891
Klp61F	2	0.855866	0.966911	1	0.965229	0.851165	0.460032	0.429592	0.322254	0.250878	0	0.565355	0.495524
CG13920	4	0	0.210468	0.253852	0.692202	0.876926	1	0.963782	0.856874	0.768488	0.736737	0.800383	0.801171
CG12011	3	0	0.326776	0.585966	0.832887	0.921334	1	0.974489	0.674882	0.343946	0.226707	0.100834	0.177655
Patj	6	0.697248	1	0.89993	0.745387	0.607944	0.464221	0.425752	0.438531	0.250479	0.0274103	0.106597	0
CG2021	6	0.905102	1	0.949263	0.943497	0.853291	0.781006	0.539909	0.306513	0.179916	0.0661667	0.0419498	0
CG13933	1	1	0.103099	0.539689	0.564755	0.466243	0.301405	0.291328	0.25183	0.210088	0.178074	0	0.150155
CG13928	4	0	0.155242	0.195982	0.622171	0.815285	0.968265	1	0.952903	0.924496	0.858515	0.759184	0.783195
CG7879	6	0.272158	1	0.639035	0.802006	0.542229	0.312575	0.483941	0.190595	0.135327	0.138584	0	0.0747469
CG12025	2	0.955174	0.799791	0.876007	0.96724	0.942788	1	0.956088	0.70254	0.519941	0.379526	0.019009	0
CG13807	2	0.649672	1	0.861072	0.77488	0.538504	0.552734	0.416554	0.375142	0.229693	0.263494	0.242284	0
yellow-g2	4	0	0	0	0	0.40711	0	0	0	0.314804	0.855426	1	0.30814
CG9004	6	0.977064	0.992431	1	0.833943	0.788694	0.46851	0.636053	0.270221	0.220526	0	0.61692	0.590907
CG15877	6	1	0.66568	0.871125	0.799249	0.794826	0.569985	0.620628	0	0.0998625	0.0806921	0.520548	0.526983
yellow-g	4	0	0	0.0121449	0.0369243	0.0444479	0.252323	0.194026	0.0544545	0.13319	0.41406	1	0.747552
CG1275	5	0.843096	0.875204	0.460036	0	0.254361	0.341771	0.398929	0.565969	0.601198	0.771633	0.943594	1
CG15820	1	1	0.0401356	0.252522	0.0712389	0.0545231	0.0256761	0	0.108161	0.335431	0.471624	0.540249	0.599241
CG5704	1	1	0.847065	0.143785	0	0.317564	0.115937	0.310084	0.429831	0.480153	0.104043	0.31117	0.506851
Pxn	4	0	0.198473	0.448019	0.708426	0.755856	0.890931	0.898033	1	0.93986	0.867015	0.586864	0.576133
CG16758	5	0	0.524429	0.669239	0.56652	0.73412	1	0.877502	0.64848	0.726327	0.973436	0.839215	0.894214
pgant6	2	0.680461	0.0827361	0.529265	0.975255	0.890109	1	0.959713	0.702289	0.445156	0.101647	0.0745853	0
CG16753	6	0.816004	1	0.721057	0.862318	0.888638	0.647915	0.561232	0.0120043	0.144801	0	0.436608	0.429845
CG32486	3	0	0.458666	0.856046	0.981385	0.976415	0.991237	1	0.669565	0.603819	0.621905	0.413796	0.50413
CG12093	2	0.887469	0.130745	1	0.758953	0.749529	0.873231	0.584519	0.433918	0.379507	0.378197	0	0.0634587
pfk	6	1	0.846719	0.640894	0.8349	0.796835	0.749672	0.496985	0.384025	0.236516	0	0.359251	0.220995
CG12009	4	0	0.00487346	0.0404454	0.20344	0.32445	0.568132	0.916056	1	0.744937	0.262931	0.000250484	0.0604892
CG11537	5	0.993709	0	0.509532	0.640731	0.367873	0.394886	0.406153	0.352867	0.793994	1	0.911797	0.969867
Cht7	4	0.00791362	0	0.0200552	0.153762	0.303299	0.464221	0.620144	0.902207	1	0.944691	0.731053	0.74562
ImpE2	5	0.108397	0.430013	0.563045	0.382713	0.369799	0.720148	1	0.995954	0.569169	0.202453	0	0.092715
dib	6	0.185641	0.884986	1	0.734526	0.544919	0.228517	0.103912	0.0598265	0.0290454	0.0924614	0	0.0671112
Ras64B	3	0.397104	0.201186	0	0.168638	0.431646	0.573833	0.678236	0.60672	0.766841	0.901632	0.919241	1
Ero1L	3	1	0	0.335873	0.519342	0.633598	0.856279	0.905623	0.581175	0.41386	0.405236	0.281653	0.376405
Cpr64Ad	4	0.0355526	0.0399097	0	0.0241451	0.117493	0.0969184	0.163571	0.705172	0.94147	1	0.434153	0.463494
CG1273	5	0	0.212612	0.415528	0.696373	0.806642	0.835233	1	0.869177	0.301895	0.147214	0.0472558	0.107486
CG11583	6	0.727956	1	0.886695	0.855914	0.869469	0.685182	0.655794	0.249721	0.23842	0	0.62061	0.545092
ago	6	0.788066	0.968942	1	0.909982	0.767264	0.564944	0.415781	0.418297	0.250739	0	0.280564	0.207857
Chd64	3	0.417241	0.450115	0.00492891	0	0.239876	0.706698	0.839523	0.798883	0.753144	0.783227	0.909666	1
Con	5	0	0.0913255	0.161687	0.602856	0.821168	0.888574	1	0.892739	0.825865	0.8013	0.705608	0.731289
CG15211	4	0	0.0447135	0.172647	0.470185	0.529075	0.757317	0.799292	0.887228	0.962344	1	0.889164	0.873686
sofe	2	1	0.516979	0.743367	0.885022	0.708661	0.465471	0.341383	0.215503	0.0719444	0.0611244	0	0.00604407
feo	2	1	0.84916	0.867745	0.903583	0.788457	0.597491	0.366256	0.23705	0.0552989	0.0458446	0	0.00106029
CG18292	6	0.656903	1	0.897909	0.576178	0.528117	0.462398	0.466922	0.347715	0.200052	0	0.310235	0.151809
CG1738	2	1	0.792948	0.845322	0.855005	0.798984	0.778303	0.569094	0.24045	0.232393	0	0.396955	0.399777
CG1737	6	1	0.841944	0.817719	0.917841	0.761248	0.667296	0.513959	0.578187	0.340263	0.161078	0.118951	0
dlg1	3	0.218373	1	0.960251	0.561123	0.496043	0	0.393609	0.385075	0.657523	0.557006	0.60089	0.49547
Gs2	5	0	0.232146	0.395481	0.747568	0.804623	0.748885	0.747331	0.71901	0.777335	0.95577	0.990191	1
nod	2	1	0.398586	0.656068	0.700138	0.589535	0.442476	0.306179	0.181673	0.0526798	0.0594013	0	0.0184646
rho-4	6	0.691966	1	0.937653	0.849988	0.757514	0.554693	0.65169	0.615895	0.23935	0	0.606706	0.524791
Ptp10D	5	0.725579	0.617378	0	0.0158252	0.362597	0.533322	0.716404	1	0.919811	0.649224	0.70041	0.658228
e(y)2	6	0.839584	1	0.95673	0.815079	0.771191	0.838136	0.473867	0.31585	0.168397	0	0.0325727	0.00515634
Kmn1	2	0.824353	0.86925	1	0.953803	0.839433	0.602186	0.544909	0.312519	0.127749	0	0.0893537	0.134248
CG1572	4	0.037521	0.00544462	0	0.0843019	0.218	0.333812	0.417444	0.64474	0.820227	0.940458	1	0.99555
FucT6	2	0.832657	0.155991	0.790835	0.880029	0.745181	1	0.568226	0.334101	0.0262525	0	0.143601	0.0184656
CG11138	5	1	0	0.713549	0.745381	0.540709	0.615717	0.82231	0.51521	0.505184	0.641433	0.639345	0.542453
CG3775	4	0	0	0	0	0	0	0	0	0	0.619275	1	0.968524
CG4645	2	0.776168	0.225263	0.739466	0.892571	0.831132	1	0.834939	0.529321	0.514587	0.36318	0.0569843	0
mew	3	0	0.654821	0.93144	0.932109	0.972135	0.939708	0.949441	1	0.994931	0.939392	0.871524	0.884885
CG15747	6	0.746652	1	0.765785	0.837188	0.796046	0.549075	0.558627	0.171571	0.151541	0	0.0592313	0.129185
CG1673	3	0.233901	0.703493	0.593712	0	0.0750762	0.156201	0.311634	0.331049	0.264546	1	0.809526	0.999293
Set2	6	0.961541	1	0.524845	0.525612	0.607108	0.231694	0.472332	0.53448	0.328508	0	0.519161	0.341695
Yippee	6	0.602522	0.709233	1	0.986356	0.960532	0.972436	0.79082	0.421394	0.377674	0.390306	0	0.224637
Rbp1-like	6	0	0.616585	0.776395	1	0.822325	0.743704	0.621209	0.612132	0.342955	0.24702	0.0885717	0.0490296
Tango2	6	0.727498	1	0.907522	0.604978	0.523608	0.581113	0.496794	0.561056	0.285913	0	0.405216	0.402676
Rtc1	6	0.877684	1	0.854716	0.929737	0.990896	0.957965	0.652402	0.363309	0.219334	0	0.667728	0.496271
CG12177	3	0.244139	0.764581	1	0.277011	0.103426	0.119665	0	0.560799	0.910519	0.930077	0.614913	0.579055
CG2691	6	0.804743	1	0.720267	0.643512	0.627151	0.433253	0.415156	0.376206	0.227402	0	0.632047	0.481133
tth	2	1	0.71593	0.416463	0.556504	0.575503	0.692945	0.545197	0.277582	0.184537	0.104604	0	0.00487229
up	4	0.0509006	0.00479545	0	0.135894	0.258231	0.468954	0.648787	0.851937	0.957417	1	0.987255	0.982454
yl	1	1	0.564945	0.263164	0.104514	0.201369	0.0838855	0.100853	0.245662	0.0760871	0.0833633	0	0.0511072
CG5541	4	0.976921	1	0.0857123	0	0.328084	0.636088	0.64834	0.775922	0.850293	0.686633	0.78324	0.78044
CG12398	2	0	0	0	0	0	0	0	0	0	0	0	0
CG9509	5	0	0.338334	0.714026	0.438798	0.417534	0	0	0.636667	0.85626	1	0.938342	0.990424
CG9512	5	0	0.295679	0.522145	0.460549	0.493803	0.483616	0.53992	0.686572	0.694512	0.812856	1	0.986239
CG5877	6	1	0.901615	0.84644	0.568052	0.717362	0.524421	0.688416	0.379041	0.359844	0	0.306043	0.463988
Top1	6	0.874245	1	0.53525	0.57282	0.644647	0.444975	0.480612	0.410502	0.342221	0	0.568504	0.453433
dah	2	1	0.924531	0.496602	0.510295	0.525944	0.397271	0.300452	0.431194	0.306361	0	0.357253	0.275059
CG9114	6	1	0.994381	0.735443	0.476306	0.514538	0.273845	0.0977099	0.13441	0	0.0319943	0.0934989	0.077074
CG9095	4	0	0.00382733	0.0158127	0.23393	0.339235	0.5996	0.814375	1	0.720482	0.444533	0.135063	0.141629
CG11655	5	1	0	0.00142425	0.264082	0.364364	0.521878	0.425727	0.560683	0.441619	0.31224	0.170367	0.165722
CG6340	6	0.818235	0.339073	0.995593	1	0.733337	0.729586	0.450314	0.293968	0.0195158	0.1428	0.120421	0
Gmap	3	0.481567	0	0.527089	0.915433	0.828698	1	0.958601	0.751675	0.497561	0.307491	0.140086	0.160628
CG7860	5	0.25989	0.382848	0	0.122675	0.442363	1	0.905815	0.903401	0.660346	0.818388	0.162945	0.469521
Pis	5	1	0	0.137223	0.0829436	0.113819	0.385966	0.244228	0.216671	0.502111	0.853968	0.746245	0.991126
CG9240	6	0.314683	0.854275	1	0.721429	0.642866	0.837767	0.338389	0.179791	0.0211571	0	0.0968906	0.193145
Scamp	6	0.809619	1	0.287433	0.622244	0.851483	0.741861	0.865293	0.2426	0.354414	0	0.428357	0.424584
CG8239	3	0.617465	0.204053	0.0896384	0.23562	0.297761	0.571521	0.641764	1	0.470572	0.0551558	0	0.0273896
sd	5	0	0.285103	0.703578	0.895606	0.981761	1	0.990309	0.66491	0.646887	0.606301	0.491038	0.556768
CG8578	6	1	0.921612	0.771505	0.733702	0.751676	0.571282	0.709334	0.3051	0.248484	0	0.154073	0.190832
CG8924	6	1	0.984774	0.575227	0.657109	0.635308	0.400346	0.453989	0.358346	0.263888	0	0.289284	0.338838
CG8939	6	0.5748	0.976488	0.974995	1	0.936777	0.677351	0.582987	0.384358	0.160149	0	0.75215	0.585105
Myb	2	0.619066	0.753383	0.918069	1	0.892051	0.570218	0.568952	0.26018	0.234691	0	0.319564	0.263611
CG8944	6	1	0.965921	0.54995	0.546845	0.644135	0.441457	0.586088	0.548416	0.389044	0	0.277871	0.313962
eas	3	0.528298	0.205404	0	0.00695484	0.193224	0.404341	0.703148	0.625758	0.867846	0.801515	0.835669	1
CG3679	2	1	0.876059	0.577289	0.469739	0.544762	0.296314	0.42028	0.368223	0.294126	0	0.244811	0.392332
sl	6	0.801926	1	0.889461	0.770481	0.777987	0.553092	0.596525	0.432462	0.273462	0	0.254337	0.255876
CG9914	3	0.178992	0.0467809	0.0100086	0	0.0153059	0.124805	0.203117	0.421157	0.590308	0.899004	1	0.991815
CG32576	3	0.24915	0.3396	0.244596	0.484428	0.69506	0.878288	1	0.275665	0.499568	0.0609046	0	0.196665
TH1	6	0.611324	0.89401	1	0.893774	0.870178	0.808088	0.589011	0.366734	0.276736	0	0.350222	0.258898
mthl1	6	1	0.677596	0.746994	0.817875	0.778032	0.530257	0.559703	0.625104	0.620732	0.181615	0	0.0400431
TwdlY	4	0	0	0	0	0	0	0	0.638082	0.948902	1	0.472563	0.524062
CG4872	2	1	0.675425	0.0464445	0.0191166	0.288986	0.526454	0.598245	0.44122	0.353128	0	0.270401	0.133805
CG4880	2	0.89977	1	0.490531	0.315747	0.492738	0.386534	0.365843	0.335357	0.301168	0	0.508461	0.490233
if	5	0	0.356995	0.500041	0.511286	0.502028	0.580233	0.681655	0.782402	0.882638	1	0.852488	0.851651
CG4991	1	1	0.291067	0.133997	0.0556902	0.0917047	0	0.0191442	0.0872752	0.0847878	0.284554	0.441157	0.411087
CG5004	3	1	0.371239	0	0.235592	0.279192	0.0373292	0.489511	0.636553	0.589936	0.46162	0.443877	0.32876
CG5010	4	1	0.185396	0	0.43421	0.617687	0.825662	0.808842	0.819046	0.812165	0.910508	0.96849	0.891735
CG8949	6	0.927019	1	0.564054	0.643843	0.558417	0.354734	0.347785	0.493871	0.292789	0	0.440274	0.253519
CG13001	6	0.614288	0.641834	1	0.991424	0.923457	0.959268	0.79527	0.59823	0.377964	0.289684	0.0315596	0
Fim	3	0.767464	0	0.455208	0.706423	0.727385	0.732612	0.71442	0.80131	0.852968	0.90199	1	0.961717
CG5800	6	0.945896	1	0.952005	0.879425	0.835333	0.659704	0.495431	0.307256	0.210896	0	0.524367	0.425935
beta-Spec	3	0	0.437709	0.715706	0.858843	0.90134	0.97611	0.965501	1	0.914454	0.93427	0.875062	0.815395
CG6398	6	0.398033	0.891402	1	0.650793	0.668717	0.746004	0.765893	0.901047	0.656149	0.0470178	0.0283305	0
CG8173	6	0.95814	1	0.714742	0.645398	0.690811	0.556232	0.484834	0.42848	0.348721	0	0.345777	0.375145
CG8188	2	0.864778	0.590312	0.164122	0.670332	1	0.658908	0.999383	0.330164	0.313238	0	0.133914	0.355356
CG8289	6	0.493207	0.354116	0.767125	1	0.913412	0.703902	0.65517	0.312262	0.259156	0.132215	0	0.100918
CG8326	2	0.59808	0.94204	1	0.820985	0.865697	0.629379	0.667021	0.118241	0.0772122	0	0.597207	0.539387
Dhc16F	4	0	0.188832	0.247522	0.103388	0.144672	0.537971	1	0.878642	0.817614	0.599098	0.197103	0.249821
dik	6	0.881303	1	0.87237	0.807554	0.711928	0.614336	0.402216	0.376227	0.195535	0	0.138829	0.0888799
Taf8	6	1	0.71494	0.818128	0.707454	0.669267	0.490148	0.405505	0.337511	0.235137	0	0.145007	0.199594
wupA	4	0.0411696	0.0151448	0	0.125054	0.26032	0.481637	0.676901	0.782761	0.934886	0.971731	0.96608	1
CG7772	5	1	0.546087	0.00510286	0	0.0752072	0.240351	0.163656	0.33195	0.390139	0.524243	0.49153	0.526067
CG6179	6	0.768219	1	0.756212	0.722975	0.626854	0.563573	0.26489	0.31577	0.113657	0	0.378723	0.0934918
Aats-his	2	1	0.700391	0.0361359	0	0.265485	0.566573	0.270458	0.406033	0.322194	0.310991	0.466832	0.357653
fu	6	0.895347	1	0.641424	0.554539	0.518209	0.324911	0.26492	0.405732	0.223954	0	0.39842	0.311269
phm	6	0.0755814	0.97042	1	0.327501	0.0406931	0.0236571	0	0.244149	0.363257	0.384746	0.358617	0.285345
CG6659	2	0.997513	1	0.549051	0.662204	0.683605	0.63007	0.514887	0.566262	0.304107	0.1509	0	0.0536715
CG6617	6	0.969433	0.986869	0.828281	0.991434	0.904545	1	0.606987	0.369642	0.163829	0.181393	0.0508488	0
CG6891	5	0	0.243756	0.44105	0.742852	0.879939	1	0.912485	0.797993	0.6293	0.574535	0.52274	0.543382
CG7358	6	0.460753	1	0.923846	0.692422	0.535762	0.501312	0.266392	0.352958	0.11357	0.066384	0.199274	0
bnb	6	0	0.957163	1	0.835649	0.794854	0.732424	0.796527	0.542816	0.298868	0.444834	0.295546	0.27045
CG18259	2	0.886035	1	0.755073	0.740833	0.854792	0.761604	0.631687	0.258996	0.195579	0	0.0861092	0.210656
Mec2	4	0	0.0314283	0.0219467	0.399823	0.652388	0.826504	0.770684	0.91621	0.877662	0.931233	1	0.956365
out	2	1	0.555895	0.405512	0.496506	0.24859	0.31589	0.360182	0.110314	0.00625723	0	0.570339	0.559775
CG8034	5	0.432139	0	0.562269	1	0.829424	0.542307	0.402803	0.421059	0.637442	0.808906	0.864941	0.801265
Pfrx	3	0.320069	0.517266	0.791535	0.429086	0.0988935	0	0.098096	0.486917	0.496614	0.703085	1	0.90426
CG14207	3	0.199541	0.246954	0	0.227806	0.380559	0.537768	0.599424	0.675329	0.835013	1	0.924016	0.94115
CG14210	2	0.458493	0.658526	0.580782	0.875584	0.923725	1	0.615963	0.0363895	0.111297	0	0.605259	0.432924
CG12237	6	1	0.844079	0.585098	0.342719	0.387133	0.384625	0.1097	0.173279	0.0634164	0.139702	0	0.00169506
CG14220	2	1	0.764932	0.805474	0.959357	0.915048	0.856985	0.553711	0.307888	0.125629	0.0595501	0.104465	0
vfl	6	0.758816	1	0.877211	0.781895	0.486636	0	0.0771417	0.432945	0.273423	0.161999	0.398541	0.165195
meso18E	2	0	0.221455	0.682999	0.897618	0.875291	1	0.860326	0.679357	0.486577	0.305536	0.107505	0.115016
gig	6	0.748922	1	0.508808	0.442485	0.49877	0.256171	0.457817	0.374952	0.219447	0	0.16322	0.14812
CG17233	2	0.945555	0.508658	0.707132	1	0.807282	0.677134	0.60347	0.571126	0.373167	0.324656	0.153256	0
Deaf1	2	1	0.635571	0.125805	0.573809	0.608072	0.569643	0.596026	0.847919	0.619185	0.367718	0.069477	0
CG9376	2	1	0	0.174151	0.595379	0.715275	0.714898	0.748812	0.394941	0.407921	0.387681	0.246716	0.364425
serp	4	0.00609615	0.00235243	0	0.334336	0.441512	0.833992	0.850189	1	0.997857	0.97408	0.590392	0.599209
Oat	5	0	0.117343	0.176133	0.636721	0.929092	0.992503	0.792843	0.576155	0.517706	0.795094	0.982527	1
pip	5	0	0.156498	0.218112	0.701136	0.898604	0.988352	1	0.892637	0.91296	0.766545	0.491933	0.559954
pip	5	0	0.156498	0.218112	0.701136	0.898604	0.988352	1	0.892637	0.91296	0.766545	0.491933	0.559954
pip	4	0	0.156498	0.218112	0.701136	0.898604	0.988352	1	0.892637	0.91296	0.766545	0.491933	0.559954
CG9629	5	0	0.368042	0.530308	0.887437	0.896318	0.974312	0.924465	0.923544	0.958479	0.932789	0.967088	1
Max	5	0	0.665333	0.859476	0.97557	1	0.850611	0.957936	0.219455	0.435608	0.424056	0.851906	0.931834
fz2	3	0	0.593955	0.8925	0.980356	0.99319	1	0.960245	0.890643	0.778632	0.713802	0.618562	0.601712
CG18135	4	0.781513	0.476332	0.0589775	0	0.0524513	0.646937	0.798698	0.842671	0.844593	0.82531	0.977327	1
CG6885	2	0.515846	1	0.473517	0.21095	0.198971	0.0872724	0.0628314	0.0107776	0.000541654	0.00468685	0	0.0601039
bora	2	0.84024	1	0.919046	0.812378	0.653987	0.386616	0.265649	0.336954	0.267441	0	0.447403	0.371714
CG4306	5	0	0.0704027	0.0581636	0.270054	0.548896	0.855258	1	0.738993	0.715922	0.485884	0.134007	0.299412
Eip75B	5	0.291559	0	0.0675063	0.553346	0.746801	0.753414	0.807727	0.848872	0.375849	0.753576	1	0.874798
Tsp74F	4	0.772668	0.11129	0.0113577	0	0.104935	0.217001	0.332095	0.591607	1	0.979043	0.528202	0.645704
CG5535	1	1	0.815012	0.310581	0	0.301822	0.472783	0.431186	0.587917	0.47983	0.102237	0.0837157	0.19711
CG5567	3	0.740911	0.364048	0	0.00412067	0.164985	0.385657	0.481777	0.43489	0.653098	0.856165	0.975474	1
Adgf-A	5	0	0.255052	0.21537	0.648164	0.859164	0.996871	1	0.661737	0.548294	0.510492	0.599554	0.616901
CycT	6	1	0.711363	0.609893	0.565581	0.380041	0.0385729	0.309166	0.146801	0.0770429	0.0973399	0.0485939	0
blot	2	1	0.725878	0.878917	0.624732	0.349471	0.393556	0.352593	0.0378877	0.116483	0.323189	0	0.124857
Cad74A	2	0	0.613877	1	0.627343	0.408835	0.441664	0.626379	0.457324	0.466401	0.374028	0.16125	0.24413
Nc73EF	5	0.219513	0.451534	0.261139	0	0.1014	0.144676	0.177492	0.615416	0.865583	1	0.998026	0.935671
CG7724	4	0	0.0813315	0.0871379	0.167949	0.26171	0.360404	0.341235	0.652963	0.98046	1	0.549887	0.60818
CG11905	4	0	0.153594	0.171687	0.405756	0.598632	0.865127	1	0.864574	0.828881	0.715364	0.514793	0.566796
l(3)73Ah	2	1	0.412226	0.520869	0.552284	0.591623	0.739234	0.534208	0.316494	0.168561	0.012905	0	0.01619
Nrt	6	0.221569	1	0.590791	0.777817	0.769077	0.794004	0.71814	0.576059	0.296481	0.0927736	0.00642272	0
CG9705	6	0.890856	1	0.741616	0.616833	0.621858	0.443367	0.43801	0.269339	0.211851	0	0.25942	0.313583
CG9951	6	1	0.707705	0.401797	0.514927	0.500716	0.60334	0.376425	0.200688	0.110173	0.0579328	0	0.0667793
CG13025	2	1	0.511624	0.722649	0.710257	0.595759	0.502545	0.309146	0.158035	0.100041	0.0678703	0	0.0505167
CG4098	1	1	0.18791	0.269407	0.442947	0.484127	0.605364	0.414451	0.331694	0.0663858	0.0332483	0.0211212	0
spd-2	2	1	0.658508	0.780902	0.752514	0.581136	0.362183	0.208038	0.151987	0.0416511	0.0311786	0	0.00813612
CG13059	4	0.119421	0.0923161	0	0.0288828	0.135283	0.166941	0.203455	0.531062	0.838729	1	0.802875	0.74796
Mipp1	3	0	0.501293	0.768848	0.724698	0.738289	0.778019	0.718364	0.727726	0.844236	0.958273	1	0.974436
PDCD-5	6	0.888159	1	0.769259	0.679943	0.668898	0.559597	0.448179	0.228795	0.216016	0.075573	0	0.0692182
Taspase1	6	1	0.806564	0.704654	0.644219	0.575095	0.595025	0.391114	0.270989	0.105544	0.128169	0.0465519	0
dbo	2	1	0.885947	0.776556	0.609337	0.685994	0.637429	0.612079	0.382224	0.221453	0	0.0748877	0.120419
Hip14	6	1	0.819094	0.461248	0.322175	0.477759	0.350558	0.305708	0.288267	0.204009	0.0786981	0	0.0410483
CG7275	6	0.558282	0.935437	1	0.849211	0.869154	0.899133	0.556343	0.408645	0.184298	0	0.587539	0.590209
CG7272	4	0	0.022637	0.195785	0.782023	0.944514	1	0.883966	0.490365	0.481774	0.639186	0.853184	0.889616
CrebA	3	0	0.305363	0.697192	0.84355	0.901402	0.843158	1	0.764301	0.57129	0.397298	0.368109	0.419768
CG12301	6	0.79827	1	0.915202	0.872936	0.884833	0.564172	0.73679	0.283561	0.253203	0	0.690545	0.662761
CG7372	6	0.692272	0.943028	1	0.824357	0.815072	0.62744	0.543538	0.315884	0.229278	0	0.500789	0.446397
CG7650	6	1	0.708226	0.692706	0.774544	0.702022	0.783666	0.576003	0.449835	0.229363	0.200491	0.010001	0
CG7656	6	0.716477	0.474059	1	0.931765	0.763846	0.901836	0.437747	0.54544	0.339232	0.616093	0.168813	0
CG7945	6	0.894934	1	0.900274	0.750987	0.780352	0.66079	0.633155	0.180542	0.265802	0.03814	0	0.175821
Tollo	6	0.467566	0.71531	0.978887	0.980731	1	0.697229	0.816692	0.523431	0.335864	0.180106	0	0.077251
Aats-gly	3	0.962096	0	0.206978	0.816345	0.900226	1	0.956032	0.873785	0.69126	0.439555	0.217082	0.184432
CG9628	4	0	0.0654276	0.142742	0.508436	0.735001	0.922483	1	0.988629	0.931666	0.83752	0.673785	0.732223
gnu	1	1	0.572555	0.31788	0.255382	0.233538	0.120803	0.09697	0.0492208	0.00378377	0.0525669	0	0.0734084
Trl	6	0.312808	0.798894	0.631067	1	0.869736	0.960156	0.83429	0.623626	0.361231	0.218412	0.219173	0
RecQ5	2	1	0.462449	0.9919	0.731179	0.606915	0.158636	0.408351	0	0.156004	0.0913391	0.322032	0.550708
stwl	6	0.994363	1	0.757928	0.819898	0.722461	0.378147	0.447461	0.221201	0.134994	0	0.129658	0.098777
CG6833	2	1	0.605839	0.703537	0.699811	0.652867	0.723626	0.335745	0.384914	0.200855	0	0.131283	0.0667187
CG32138	2	1	0.35483	0.839024	0.814776	0.710964	0.635677	0.722299	0.538975	0.52644	0.348363	0	0.0706467
blue	1	0.386055	0.563827	1	0.955397	0.793502	0.529813	0.579241	0.50792	0.326847	0.189736	0	0.0242905
CG8783	2	1	0.385663	0.237182	0.217476	0.199392	0.262805	0.201859	0.241568	0.212688	0.179038	0	0.0596691
ImpL1	5	0	0.0790487	0.0144748	0.268823	0.361198	0.725508	0.985348	1	0.615573	0.331867	0.0834626	0.181397
CG14110	5	0.01722	0.114889	0.0913566	0.38417	0.456897	0.868502	1	0.848271	0.434619	0.276946	0	0.142535
CG11263	2	0.900814	1	0.401444	0.129805	0.306368	0.248462	0.33186	0.230125	0.197185	0	0.48412	0.387139
CG11279	5	0.573532	0	0.638604	0.712237	0.794482	1	0.664441	0.366063	0.372872	0.24567	0.658988	0.548667
sti	6	0.657905	0.882027	1	0.959918	0.830691	0.542743	0.489311	0.331921	0.232483	0	0.463902	0.391059
CG11534	2	1	0.153672	0.359233	0.457415	0.446904	0.665966	0.428877	0.319501	0.337316	0.287798	0	0.0307115
Nrx-IV	5	0.1106	0	0.329528	0.636333	0.742703	0.783197	1	0.749751	0.631129	0.485841	0.288409	0.400839
CAH2	4	0.477004	0.291204	0.0918445	0	0.133939	0.236646	0.336119	0.54785	0.689795	0.784159	0.932897	1
Pbgs	3	0.456679	0	0.505822	0.671738	0.787365	1	0.822125	0.879632	0.779605	0.684572	0.502927	0.449314
CG5645	2	0.878908	0.274116	0.667954	0.897548	1	0.527875	0.850386	0.082105	0.198765	0	0.740683	0.739629
CG6928	1	1	0.0757811	0.0934668	0	0.133733	0.201737	0.319001	0.18704	0.162035	0.138956	0.413492	0.249011
CG6793	3	0	0	0	0	0	0	0	0	0	0	0	0
CycA	2	1	0.904398	0.915615	0.866841	0.793809	0.570254	0.496823	0.310978	0.230651	0	0.351421	0.341024
CG10361	4	0.0188569	0	0.0266673	0.219533	0.304032	0.865419	0.916235	0.973831	0.894695	0.791096	0.964395	1
chrb	5	0.310951	0	0.366371	0.847163	0.898386	0.687982	1	0.488526	0.428949	0.278599	0.195369	0.337763
CG11652	6	0.46245	1	0.560509	0.283026	0.659518	0.847122	0.562612	0.192298	0.216664	0.279522	0	0.0303952
rt	2	0.779051	0.41308	0.445666	0.26732	0.331479	0.70696	0.947758	1	0.614337	0.316638	0	0.0415158
CG7616	3	1	0.68048	0.323456	0	0.211648	0.285306	0.380256	0.576542	0.670376	0.636554	0.620541	0.688776
SuUR	6	0.953828	1	0.589733	0.531739	0.566325	0.298914	0.516418	0.33466	0.39275	0	0.449115	0.478956
CG7839	6	0.823634	1	0.727503	0.724257	0.743716	0.440121	0.596442	0.350432	0.279587	0	0.583826	0.543375
CG32082	4	0.0195155	0.00165646	0	0.126488	0.219368	0.420971	0.738964	1	0.761269	0.795274	0.664192	0.663121
JIL-1	6	0.8109	0.767446	0.771648	1	0.846593	0.460296	0.794181	0.652795	0.44389	0	0.430929	0.248875
CG32069	6	0.601968	0.581391	0.972539	0.864691	0.916517	1	0.829689	0	0.388591	0.033798	0.0627562	0.0496734
Aps	6	0.758617	1	0.853305	0.239147	0.41321	0.43809	0.49704	0.407887	0.315834	0	0.370874	0.397905
CG8009	6	0.986486	1	0.882122	0.715675	0.56832	0.459441	0.560959	0.368864	0.217136	0.0048651	0	0.0529923
CG7949	6	1	0.238554	0.221399	0.645305	0.584632	0.779162	0.530921	0.401429	0.330303	0	0.254911	0.19258
ect	4	0.01914	0	0.0227986	0.213415	0.288605	0.508861	0.784836	1	0.803353	0.375866	0.158916	0.210694
CG8177	5	0.79652	0.571333	0.208479	0.0702743	0.257512	0	0.320222	0.334994	0.403533	0.577931	0.940329	1
LanB2	5	0	0.484518	0.745084	0.878433	0.922472	0.928659	0.997698	1	0.93203	0.852741	0.66702	0.690656
CG4476	1	1	0.191632	0.129541	0.0729726	0.134034	0.0785841	0.0774371	0.0662104	0	0.0530504	0.0499588	0.103185
pall	2	0.884574	1	0.997419	0.734005	0.738367	0.547745	0.502448	0.23885	0.153903	0	0.119298	0.2709
CG3967	4	0.655101	0.0660793	0.0617008	0	0.130651	0.662221	0.876737	0.934335	1	0.912847	0.60694	0.690081
Klp67A	2	0.92674	0.903434	1	0.952841	0.843386	0.587263	0.504547	0.279274	0.174908	0.0566472	0	0.179791
Tsp66E	4	0.699065	0.372513	0.0893233	0	0.150755	0.366441	0.712008	0.92755	1	0.849795	0.736838	0.825004
GNBP3	1	0.166204	0.0102197	0.0221391	0.200242	0.267109	0.900327	1	0.534834	0	0.0625375	0.57429	0.641861
CG5021	5	1	0	0.409474	0.701212	0.795376	0.963795	0.936039	0.778916	0.716048	0.53925	0.46545	0.492635
CG5068	6	1	0.48144	0.687396	0.613474	0.6655	0.833284	0.425571	0.450584	0.242018	0.120023	0.0356317	0
bol	5	0	0.165288	0.495285	0.760557	0.830369	0.783615	1	0.864221	0.926639	0.863301	0.700438	0.722473
smg	1	1	0.766553	0.374191	0.287945	0.430145	0.151505	0.346254	0.434095	0.359122	0	0.519836	0.485584
Cp18	1	0	0.785188	1	0.778949	0.230319	0.206972	0.290427	0.225824	0.449588	0.445084	0.294434	0.163035
Cp19	1	0	0	0	0	0	0	0	0	0	1	0	0
Cp16	4	0	0	0	0	0	0	0	1	0	0.435748	0	0
dally	5	0	0.412633	0.795854	0.928293	1	0.936413	0.944871	0.826871	0.88869	0.902214	0.824817	0.845825
Prm	4	0.00972371	0.0081224	0	0.0568399	0.178483	0.252837	0.441657	0.808275	0.92646	1	0.935584	0.907409
Cdc6	2	0.935896	1	0.901243	0.820551	0.7981	0.731916	0.694238	0.678585	0.61749	0	0	0
Nelf-E	2	0.863049	0.964111	1	0.908845	0.837078	0.755043	0.57369	0.169205	0.183428	0	0.208676	0.0926627
CG6683	6	1	0.976374	0.727996	0.653226	0.752414	0.6342	0.501786	0.214329	0.276743	0	0.57259	0.530223
CG6983	3	0.698345	0	0.855829	0.619342	0.611537	0.379979	0.377004	0.106038	1	0.78978	0.0156862	0.303014
CdsA	3	0.798201	0.337898	0	0.320454	0.559446	0.609811	0.942341	0.632375	0.86393	0.795819	0.799404	1
CG8005	6	0.536869	0.878987	1	0.942563	0.828082	0.959528	0.650793	0.501901	0.166921	0	0.286182	0.200524
CG13671	2	1	0.337763	0.636879	0.606344	0.556284	0.559073	0.439301	0.231862	0.232459	0.120533	0	0.075653
RecQ4	2	1	0.582613	0.833059	0.684734	0.513976	0.24634	0.210461	0.223686	0.182171	0.0474076	0.0222312	0
syd	5	0.672364	0	0.444323	0.508637	0.556215	0.70077	0.622959	0.723827	0.774676	1	0.622445	0.534378
pbl	6	0.80119	0.90424	1	0.739782	0.56903	0.326353	0.255841	0	0.0767177	0.157038	0.316857	0.387027
CG8539	4	0.00678864	0.00419738	0	0.0907559	0.273394	0.794161	1	0.614643	0.260349	0.147588	0.103031	0.173942
Neos	6	0.917788	1	0.554946	0.526323	0.671621	0.787597	0.498482	0.448448	0.320875	0	0.57936	0.442609
qm	3	0.732573	0.670531	0	0.216125	0.457389	0.699001	0.789277	0.575218	0.813618	1	0.82991	0.946108
smid	6	0.857348	1	0.917586	0.755343	0.688602	0.493997	0.447944	0.28985	0.219729	0	0.43577	0.385597
Rac2	3	0	0.37339	0.886311	0.742891	0.875663	0.777142	0.856536	0.497209	0.725395	1	0.823085	0.899191
CTCF	6	1	0.525384	0.864206	0.941367	0.819931	0.621305	0.437725	0.271987	0.154424	0.110853	0	0.0456091
CG14834	1	0	0.182354	0.54599	0.829374	0.71425	1	0.768579	0.518096	0.426541	0.333459	0.417388	0.374094
eco	1	1	0.586108	0.602126	0.635885	0.491787	0.286439	0.302007	0.126396	0.108643	0.0611466	0	0.0137779
sgl	3	0.825185	0.35397	0	0.506007	0.612286	0.939627	0.726307	0.765719	0.660881	1	0.393279	0.496593
vvl	5	0	0.280469	0.476709	0.90696	0.962849	0.908665	0.910956	1	0.898646	0.867307	0.77426	0.643051
Prat2	5	0	0.259044	0.545109	0.95516	0.971511	1	0.981723	0.877363	0.735229	0.754221	0.51478	0.680092
ImpL3	5	0	0.300347	0.255282	0.442391	0.441633	0.701464	0.833696	1	0.905888	0.820945	0.916967	0.877473
LanA	5	0	0.370655	0.650148	0.881649	0.922225	0.837721	1	0.995205	0.942962	0.835687	0.673019	0.704648
CG13298	6	0.705016	1	0.995586	0.952711	0.92409	0.875129	0.69685	0.281688	0.15468	0	0.0440555	0.0428864
D19A	5	1	0	0.320077	0.846994	0.870304	0.903642	0.846398	0.821649	0.73068	0.66357	0.605307	0.585888
D19B	6	0.856798	0.941852	0.672166	1	0.95965	0.965594	0.61389	0.741633	0.352537	0	0.485267	0.330295
CG5568	2	1	0.798985	0.398359	0.268055	0.452317	0.253532	0.513673	0.281637	0.353547	0	0.445256	0.552652
CG32409	6	0.658537	0.920297	0.928276	0.965012	0.978482	1	0.612269	0.398881	0.192996	0	0.555558	0.438967
CG32407	5	0	0.111371	0.293987	0.74346	0.814251	0.958014	1	0.592778	0.478083	0.404511	0.281664	0.377356
CG10467	6	1	0.955185	0.941805	0.746779	0.652141	0.418803	0.374172	0.316645	0.310455	0.254285	0	0.123639
CG13295	1	0.271879	0.176684	0.843303	0.649968	0.599992	0.445382	0.442746	0	0.362525	0.732368	0.770566	1
Sras	1	1	0.928345	0.981427	0.743859	0.621026	0.825327	0.612524	0.476187	0.40906	0.238138	0	0.0678488
lin-28	5	0	0.324172	0.602873	0.973377	1	0.973494	0.97322	0.817838	0.766646	0.877333	0.759449	0.845669
CG5537	6	0.882291	1	0.665171	0.747642	0.805079	0.826786	0.420059	0.413127	0.0358663	0.0671261	0.106108	0
Myt1	1	1	0.450503	0.512641	0.582132	0.482497	0.370275	0.290368	0.16144	0.0337283	0	0.0145255	0.033109
Sse	2	1	0.75116	0.848984	0.743462	0.598276	0.322751	0.291379	0.0820614	0.0554475	0	0.00415977	0.0697026
CG10591	5	0	0.104062	0.0709634	0.429876	0.517693	0.954153	1	0.710626	0.289266	0.28882	0.163309	0.216601
spo	2	0.27099	1	0.856589	0.361276	0.222092	0.111353	0.0884793	0.0305047	0.0245027	0.0748625	0	0.0373093
sinu	3	0	0.275647	0.486806	0.692016	0.834204	0.948784	1	0.722505	0.722129	0.555252	0.364504	0.476015
CG10635	6	1	0.335534	0.453694	0.360851	0.334164	0.82789	0.485614	0.385254	0.386942	0.186353	0	0.0203009
fliI	6	1	0.71631	0.533874	0.539748	0.439971	0.375179	0.352952	0.276081	0.145324	0.0613318	0.069586	0
Sep1	6	0.60047	0.829834	1	0.866672	0.689728	0.519181	0.496832	0.413389	0.283	0	0.411921	0.293772
pen	6	0.67117	1	0.918485	0.987601	0.946483	0.951754	0.534623	0.410151	0.201849	0	0.580281	0.430749
CG32521	4	0.614082	0.656494	0.289762	0	0.0874799	0.175499	0.214816	0.489628	0.520839	0.852508	1	0.852324
Tak1	2	1	0.789062	0.519185	0.835868	0.821198	0.566676	0.428814	0.576624	0.599225	0.310208	0.090086	0
RhoGAP19D	6	0.84355	0.828892	0.570234	0.514462	0.49669	0	0.450338	1	0.70078	0.441891	0.23607	0.0898201
Obp19c	1	1	0.861251	0.563048	0.645347	0.521621	0	0.161905	0.638431	0	0	0.32584	0.396021
obst-A	4	0.0434442	0.0090013	0	0.178046	0.318363	0.487608	0.632439	0.83651	1	0.802281	0.384359	0.362484
CG17068	2	1	0.853577	0.756201	0.592647	0.504922	0.382681	0.238343	0.328269	0.148754	0	0.0114457	0.0313945
CG15628	2	0.158155	0.956956	1	0.591092	0.329718	0.200648	0.21369	0.210756	0.115441	0.0391273	0	0.0480308
hoe1	1	1	0.547676	0.0886224	0	0.303727	0.243962	0.308857	0.586132	0.501697	0.479844	0.563968	0.558139
Bsg25A	1	0.581361	1	0.264597	0.0534195	0.105565	0.0172719	0.0229579	0.0278714	0.00471334	0.0340426	0	0.117653
Traf4	2	0	0.728152	1	0.979612	0.852588	0.764257	0.668676	0.388248	0.301861	0.222788	0.0746318	0.112114
Tps1	5	0	0.309618	0.59057	0.947053	0.916173	0.815321	0.743044	0.82293	0.816422	0.957066	1	0.996396
Dim1	6	0.723737	0.871579	1	0.907831	0.843006	0.71714	0.699726	0.543466	0.380254	0.107699	0	0.0599519
Gs1l	3	0.768368	0.168409	0	0.0778651	0.230594	0.481318	0.440238	0.558378	0.616287	0.826802	0.946097	1
CG15440	6	0.437741	0.912385	1	0.889299	0.813555	0.871668	0.469184	0.363632	0.117046	0.158786	0.0795613	0
CG15439	6	1	0.757635	0.689939	0.683788	0.594268	0.434926	0.315295	0.398371	0.201671	0	0.055923	0.0622098
ft	3	0	0.42083	0.870772	1	0.995662	0.784414	0.913181	0.686793	0.452433	0.397716	0.286717	0.305699
CG3921	4	0	0.0343661	0.0610618	0.291892	0.335685	0.700998	1	0.776212	0.767565	0.675835	0.538165	0.610651
CG2818	6	0.875403	0.778216	0.922146	1	0.804577	0.937861	0.948808	0.694914	0.363461	0.145153	0	0.157441
CG3238	2	0.878724	1	0.99439	0.892307	0.802037	0.649947	0.502275	0.322905	0.214392	0	0.33337	0.279899
CG3246	4	0	0.250046	0.481908	0.766138	0.847125	0.953045	0.89461	1	0.931604	0.864574	0.7848	0.785452
Cog3	6	1	0.200617	0.367468	0.409249	0.441432	0.516933	0.462546	0.280004	0.143137	0.0426103	0	0.0503924
pgant2	4	0	0.0356054	0.0251977	0.371973	0.497963	0.831325	0.926741	0.913342	0.944785	1	0.666619	0.688982
CG2991	4	0.719265	0.497663	0	0.553272	0.865123	0.829446	1	0.970441	0.956257	0.79845	0.644591	0.795935
CG8814	5	1	0.048024	0.0624982	0.0169541	0	0.2245	0.211648	0.594739	0.639998	0.509487	0.155095	0.121607
betaggt-II	3	0.164071	0.863088	0.907852	0.462868	0.0535013	0.655748	0	0.672109	0.309623	0.862415	1	0.615833
gammaTub23C	6	0.898759	1	0.937589	0.782767	0.694114	0.551807	0.436542	0.22176	0.102895	0.0649506	0	0.10001
Bem46	2	0.725417	0.829825	1	0.667485	0.529831	0.453301	0.390253	0.328332	0.23491	0.129952	0	0.0212585
CG17219	6	0.334168	0.786966	1	0.72471	0.763446	0.540154	0.842953	0.218076	0.276265	0	0.373277	0.49961
CG17260	2	1	0.565308	0.0984578	0.14511	0.341063	0.317209	0.191897	0.180826	0.173987	0	0.424981	0.259182
CG3523	5	0.230252	0.153671	0	0.0682795	0.117975	0.184504	0.293139	0.306248	0.498453	0.813608	0.957038	1
toc	1	1	0.754212	0.168964	0	0.074974	0.364541	0.694254	0.578779	0.892979	0.857875	0.690728	0.777377
cnir	2	1	0.212696	0.365864	0.621346	0.692512	0.890196	0.777031	0.527963	0.357579	0.244305	0	0.141063
alpha4GT1	1	1	0.794185	0.546442	0.544377	0.562832	0.488002	0.46088	0.323607	0.262903	0	0.365521	0.395574
Chd1	6	1	0.544194	0.470595	0.586877	0.469183	0.35129	0.225892	0.16313	0.120196	0.150508	0.0376513	0
Cwc25	6	0.784054	1	0.819371	0.593282	0.477269	0.081752	0.332481	0.087047	0.10378	0	0.288051	0.37703
Trn-SR	6	0.847152	1	0.692976	0.686857	0.701722	0.721041	0.507339	0.473316	0.289772	0	0.268228	0.216282
Taf10	2	0.573082	0.848947	1	0.851789	0.720031	0.640599	0.517214	0.22204	0.118089	0.131362	0.00889246	0
insv	2	0.692129	1	0.660623	0.603087	0.511076	0.376475	0.31225	0.264265	0.185319	0	0.404623	0.324477
Cyp309a2	5	0	0.454849	0.4226	0.371449	0.328586	0.469053	0.650993	0.902327	1	0.731869	0.212064	0.203734
CG4267	1	0.984333	0.260137	0.0974722	0.0649665	0.120233	0.162908	0	0.015376	0.438341	0.655913	1	0.968171
mio	6	0.629863	0.933065	1	0.706774	0.566849	0.403522	0.301369	0.184678	0	0.00232855	0.0258077	0.0557978
aop	2	0.350185	0.514845	0.900982	1	0.824804	0.609522	0.633202	0.369483	0.209395	0	0.249846	0.234536
CG11723	2	0.90571	0.891861	1	0.73414	0.64573	0.60099	0.466296	0.246763	0.209895	0.0712668	0	0.059458
CG17712	2	0.770977	0	0.696864	0.781477	0.748776	1	0.687689	0.540451	0.371226	0.213487	0.0746092	0.114065
lea	6	0	0.751257	0.99887	1	0.91224	0.691509	0.772967	0.692828	0.570245	0.430307	0.21963	0.266699
CG5080	5	0	0.0906123	0.0238802	0.439873	0.593862	1	0.97466	0.903647	0.666401	0.554583	0.292207	0.299405
S	2	0.896675	0.729203	1	0.935171	0.820547	0.526252	0.489531	0.398322	0.158571	0.0833888	0.00461222	0
Clp	6	1	0.85946	0.829781	0.592415	0.473653	0.458542	0.232827	0.246885	0.0378915	0.0166682	0.0865839	0
Lsp1beta	1	0.0180294	0.0205857	0.0397732	1	0.678073	0.0558824	0	0.161808	0.139216	0.20104	0.0903361	0.109654
aru	5	0	0.119113	0.366331	0.675643	0.693922	1	0.899314	0.896814	0.636726	0.630275	0.651546	0.571071
ds	3	0	0.338009	0.835067	1	0.987515	0.766387	0.889139	0.633734	0.526227	0.480541	0.287199	0.328023
CG4133	5	0	0.641016	0.713488	0.829493	0.845093	1	0.982574	0.987621	0.89644	0.821089	0.592099	0.598863
CG11885	6	0.963757	0.970727	1	0.791184	0.727479	0.709181	0.613863	0.408053	0.178842	0	0.234042	0.191962
dbr	6	0.757375	0.552075	0.736651	0.361903	0.494159	0.166524	1	0.222497	0.455368	0	0.525667	0.75323
CG11454	2	0.574163	0	0.898142	1	0.78288	0.841854	0.534813	0.40807	0.254597	0.171064	0.0498221	0.0863525
CG11555	6	0.96534	1	0.859143	0.785562	0.898292	0.633131	0.943311	0.371766	0.38234	0	0.385226	0.490197
CG3625	5	0	0.397143	0.762016	0.896626	0.995989	1	0.984126	0.644588	0.603237	0.59599	0.538331	0.585743
mbm	6	0.84192	1	0.668079	0.873401	0.862473	0.685423	0.617324	0.280831	0.288286	0	0.712534	0.615642
Rpp30	2	0.402771	0.613922	0.815917	1	0.922036	0.945312	0.856973	0.341867	0.248299	0	0.155845	0.219626
CG3164	4	0.302829	0	0.071739	0.530541	0.728573	0.916399	0.963942	0.854281	0.84235	0.892937	0.955587	1
CG4858	3	0	0.325618	0.717382	0.541785	0.541722	1	0.585537	0.604866	0.534667	0.488392	0.283093	0.410301
CG5059	3	0	0.90117	1	0.724288	0.635119	0.706444	0.771056	0.491292	0.579033	0.621628	0.482535	0.61346
Spc105R	2	0.790111	0.525131	0.959073	1	0.889791	0.444858	0.531427	0.156334	0.0934129	0	0.0460302	0.0717651
CG11396	2	1	0.0299624	0.344705	0.261982	0.24004	0.129498	0.236728	0	0.105847	0.0303458	0.0266771	0.162007
CG11399	2	1	0.559916	0.255011	0.316933	0.196201	0.0117902	0.17592	0.181568	0.0881491	0.0737709	0.00816065	0
Sin	2	0.57753	0.349029	0.861524	0.921609	0.934612	1	0.751082	0.401589	0.147152	0.0522705	0.0624738	0
siz	6	0.164557	0.646134	1	0.908137	0.429061	0.168731	0.283427	0.497537	0.440463	0.398496	0.0551839	0
CG10512	5	0	0.0958053	0.225841	0.72664	0.893313	0.905681	0.760736	0.522694	0.558923	0.741602	1	0.963067
CG12975	6	0.704777	0.319344	0.850953	0.853007	0.917413	0.814724	1	0.324029	0.268931	0	0.456339	0.550563
CG33054	3	0.863783	0.971899	0.911118	0.288297	0.0355749	0	0.284328	0.152903	0.441739	0.65073	0.81039	1
CG7611	6	0.39296	0.884282	1	0.966831	0.826494	0.721826	0.799661	0.998576	0.583924	0.270535	0.120508	0
CG7173	4	0.023897	0	0.0668973	0.183006	0.25639	0.471918	0.767154	1	0.610481	0.242302	0.0809973	0.110097
Hr78	5	0.958382	0.163136	0	0.639088	0.896836	1	0.981193	0.798183	0.777479	0.869475	0.747163	0.740749
CG5656	2	0	0.339123	0.44232	0.472978	0.570031	1	0.989276	0.602643	0.168168	0.111632	0.055812	0.107902
Pc	2	1	0.633018	0.814147	0.679662	0.66123	0.498144	0.441993	0.296127	0.157667	0.0909677	0	0.0672302
ppl	3	0.480122	0	0.646908	0.862406	0.723827	0.891153	1	0.654441	0.670383	0.704169	0.620855	0.772302
CG7470	5	0	0.0391558	0.12592	0.504531	0.593157	0.758491	0.712272	0.826725	0.853921	0.951301	0.977629	1
Ten-m	3	0	0.504007	0.869704	0.880914	0.888499	0.675796	0.955079	1	0.942369	0.773534	0.552547	0.557922
slif	4	1	0.224202	0.0746634	0	0.0300647	0.0100026	0.102543	0.421832	0.828562	0.932287	0.838658	0.862941
Mes2	6	0.847178	0.58073	0.963265	1	0.897158	0.8999	0.758648	0.482038	0.297216	0.12818	0	0.0355043
Osi6	5	0.0693243	0	0.0335694	0.227451	0.308916	0.451033	0.735326	1	0.794833	0.378111	0.0933326	0.133872
Osi7	5	0.0364069	0	0.00599638	0.215437	0.27371	0.420679	0.688444	1	0.782963	0.36576	0.0825047	0.106576
Osi15	4	0.0686271	0	0.0266788	0.155558	0.265466	0.38316	0.659246	0.95546	1	0.701622	0.171012	0.24681
Obp83g	4	0.0675764	0	0.0470965	0.0737528	0.199097	0.279564	0.332711	0.744121	1	0.822061	0.700491	0.688507
Itp-r83A	4	0.555079	0	0.250504	0.510461	0.559741	0.613145	1	0.84342	0.761379	0.704005	0.631068	0.690415
Madm	6	1	0.678267	0.526246	0.707181	0.6659	0.70002	0.43117	0.522938	0.3091	0.280967	0.212722	0
Xe7	3	0	0.797631	0.724001	0.999539	0.956756	0.739796	1	0.398056	0.373759	0.37588	0.362995	0.380755
MTA1-like	6	0.821625	1	0.927496	0.927326	0.843236	0.710585	0.625158	0.561726	0.30516	0	0.0764485	0.0435785
asl	2	0.836521	1	0.989395	0.91583	0.784655	0.391614	0.488684	0.276685	0.202846	0	0.474104	0.450593
CG2926	6	0.88613	1	0.7321	0.851892	0.743656	0.250254	0.570673	0.509793	0.298592	0	0.614773	0.439505
ksr	6	1	0.881167	0.751558	0.78432	0.673169	0.517287	0.495319	0.492916	0.235091	0.111502	0	0.0302988
Hdac3	6	0.854018	1	0.481966	0.715612	0.751128	0.635342	0.46129	0.516139	0.323165	0	0.270405	0.223419
CG2663	4	0	0.0186794	0.0626992	0.0977869	0.182091	0.455731	0.567383	0.878272	1	0.842491	0.361798	0.359944
hd	2	1	0.532431	0.639014	0.543151	0.386587	0.251139	0.0865595	0.201644	0.148162	0.0543784	0.0209962	0
CG12163	1	0.209061	0.764149	1	0.876005	0.619577	0.391758	0.231748	0.307391	0.464363	0.420319	0.0708014	0
opa	1	0	1	0.657441	0.504309	0.559907	0.444026	0.427283	0.322886	0.197005	0.246525	0.1426	0.0952928
CG12007	6	0.56956	0.403619	1	0.698379	0.344182	0.943052	0.648233	0.0257891	0.0908555	0.219454	0	0.271635
CG1129	6	0.400124	0.229363	0.395201	0.66002	0.745182	1	0.824691	0.465817	0.249237	0.104312	0	0.0645213
CG12581	3	0	0.799477	1	0.945268	0.892768	0.974111	0.90724	0.902816	0.783527	0.761582	0.576867	0.571292
TwdlF	4	0.0781287	0	0.0335806	0.123245	0.230731	0.235398	0.354543	0.879673	1	0.618555	0.20625	0.253917
Marcal1	1	0.963979	0.736797	1	0.824475	0.586804	0.340592	0.190694	0.0603117	0.043415	0.0336207	0	0.043436
Cg25C	4	0.00965745	0.0034724	0	0.226503	0.319318	0.487228	0.613975	0.827909	0.919025	1	0.947879	0.910788
CG5828	6	1	0.449383	0.133053	0.537308	0.370127	0.365822	0.231543	0.680432	0.893126	0.268727	0	0.0635218
pgant5	5	0.997996	0	0.18165	0.745379	0.939214	0.899797	0.99099	0.766471	1	0.790347	0.180616	0.286261
CG14036	2	1	0.490264	0.315225	0.180491	0.150777	0.0800883	0.0405207	0.0686227	0	0.0318696	0.0129832	0.0708953
CG31650	6	0.546717	0.939508	1	0.862059	0.909055	0.978058	0.709918	0.51572	0.306028	0	0.338973	0.26654
vkg	4	0.0316289	0.0224068	0	0.211854	0.303489	0.446661	0.591546	0.845975	0.922583	1	0.926012	0.88272
Rtnl1	3	0	0.534304	0.764955	0.661545	0.750648	0.950945	1	0.693202	0.43169	0.0861759	0.124807	0.283714
Rtnl1	2	0	0.534304	0.764955	0.661545	0.750648	0.950945	1	0.693202	0.43169	0.0861759	0.124807	0.283714
l(2)05714	6	0.886455	0.923448	0.990177	1	0.901428	0.709156	0.820866	0.160475	0.181604	0	0.27152	0.34475
Bub1	2	1	0.866475	0.531507	0.535723	0.449058	0.343235	0.345202	0.225665	0.156331	0.0896618	0	0.00366507
CG31915	5	0.546387	0.295387	0.194628	0.56974	0.713252	0.951333	1	0.942138	0.83643	0.503362	0	0.0650288
Oscillin	5	0	0.398639	0.632394	0.714858	0.861532	1	0.891356	0.56875	0.455688	0.367858	0.396925	0.491485
CG11030	6	0.731908	0.914144	0.72894	0.879412	0.971253	1	0.894201	0.611008	0.288258	0	0.601724	0.500424
CG7239	2	0.933879	0.826798	1	0.965326	0.777738	0.653863	0.417967	0.308174	0.120211	0.128532	0.0905019	0
CG9107	6	0.522473	0.868684	1	0.954702	0.816303	0.816109	0.538764	0.552524	0.228269	0	0.432371	0.227401
lid	6	0.822777	1	0.623074	0.622907	0.614218	0.148433	0.479446	0.561241	0.299023	0	0.508343	0.29774
CG13992	1	0.0294157	0.454156	1	0.718436	0.329132	0.0664283	0.154239	0	0.118955	0.167077	0.0751111	0.164828
DLP	2	1	0.48792	0.393777	0.614724	0.557341	0.0950234	0.576528	0.274201	0.238581	0	0.222456	0.31352
CG31638	2	0.619361	0.480227	1	0.955066	0.860216	0.781566	0.68321	0.418756	0.269185	0.192633	0	0.062146
Tig	4	0	0.0202934	0.059127	0.332189	0.436709	0.653369	0.824606	0.991212	1	0.99888	0.871811	0.862969
CG31637	1	0.820568	0.359133	0	0.300557	0.511487	0.825946	0.848306	1	0.656201	0.411399	0.278498	0.23651
CG11050	6	0.644329	1	0.925301	0.772018	0.512789	0.314687	0.217207	0.0598364	0	0.159622	0.22819	0.252737
CG11070	3	1	0	0.0305243	0.379585	0.556671	0.640685	0.686519	0.596753	0.536599	0.505528	0.419055	0.452955
Liprin-alpha	6	1	0.250269	0	0.479414	0.609801	0.611382	0.594955	0.600479	0.572469	0.275575	0.0372568	0.0107437
Tsp	5	0	0.220279	0.391909	0.717659	0.836046	0.87961	0.955424	1	0.959066	0.927185	0.801152	0.806447
sip2	6	0.772781	0.938865	1	0.894152	0.796475	0.467101	0.403713	0.20015	0.144234	0	0.125384	0.20563
nrv2	3	0	0.39602	0.735536	0.922742	0.946883	1	0.998167	0.86494	0.91775	0.950466	0.883888	0.955108
nrv1	4	0.849649	0.300957	0	0.510977	0.660166	0.84041	0.960063	0.763696	0.740274	0.825721	0.929205	1
Nuf2	2	0.813565	1	0.989706	0.811761	0.77411	0.51397	0.513458	0.167499	0.194067	0	0.382268	0.430245
CG5171	5	0	0.328013	0.561276	0.730858	0.821958	0.961939	1	0.755915	0.739935	0.63397	0.444919	0.531742
CG5177	4	0.0468409	0	0.033937	0.138089	0.260315	0.403116	0.60834	0.870551	0.983603	1	0.914161	0.910533
chm	2	1	0.796665	0.930614	0.876409	0.773283	0.563385	0.556997	0.144036	0.107777	0	0.0752634	0.115454
CG5973	4	0	0.0708868	0.145864	0.51437	0.698317	0.729408	0.87838	0.804164	0.967344	1	0.659078	0.764071
CG5958	5	0	0.162926	0.328128	0.741299	0.884139	0.948661	0.897754	0.787252	0.760437	0.778019	1	0.972551
CG7154	6	0.952469	0.925438	1	0.888921	0.819493	0.557235	0.597121	0.41651	0.275191	0	0.534235	0.530801
r2d2	6	0.889803	1	0.62262	0.726413	0.885368	0.941493	0.788442	0.327261	0.348831	0	0.155746	0.273433
LanB1	5	0	0.372711	0.668419	0.840081	0.898829	0.902608	1	0.93023	0.875692	0.761874	0.60529	0.639492
Herp	5	1	0	0.38667	0.669565	0.566917	0.476417	0.567112	0.428655	0.408664	0.648573	0.55205	0.615369
CG7115	1	1	0.564928	0.151459	0.0776104	0.223479	0.392543	0.419116	0.452303	0.638325	0.40933	0	0.109259
Mcr	2	0.443508	0.017254	0.599529	0.957599	1	0.885424	0.984266	0.644373	0.458647	0.300362	0	0.117342
CG7227	4	0	0.0942619	0.339545	0.438787	0.448024	0.768773	0.956806	1	0.883909	0.649093	0.242749	0.318884
CG8668	1	1	0.10525	0.142472	0.389818	0.256877	0.334409	0.270464	0	0.534618	0.403495	0.348869	0.41844
CG7787	6	1	0	0.627306	0.93002	0.990036	0.961129	0.818832	0.32731	0.49996	0.327091	0.135876	0.35022
Pvr	5	0	0.210596	0.514	0.739274	0.865295	0.934461	1	0.939384	0.950807	0.878359	0.68064	0.742713
CG8372	2	0.756967	1	0.797954	0.753774	0.812186	0.85561	0.502835	0.637141	0.51094	0.0988355	0.100302	0
CG8498	3	0.604245	0.0228545	0	0.202977	0.474464	1	0.860312	0.0871821	0.146782	0.15739	0.244735	0.342387
CSN8	6	0.671451	0.990594	1	0.810701	0.818081	0.662849	0.775019	0.177788	0.234738	0	0.0339167	0.250669
CG13384	6	0.432311	0.721381	1	0.97269	0.825711	0.506412	0.432079	0.151852	0.193295	0.18947	0	0.173117
fu2	2	1	0.752802	0.676235	0.556667	0.570037	0.433071	0.405835	0.318651	0.173477	0	0.258424	0.263289
CG13090	6	1	0.902376	0.915554	0.75392	0.622805	0.382117	0.304893	0.369462	0.243339	0	0.0417307	0.041646
Sema-1a	3	0.137822	0.151701	0.300109	0.79168	0.839531	0.681314	1	0.766343	0.529709	0.233439	0.00896993	0
CG13097	6	0.840443	1	0.810051	0.766289	0.794425	0.537136	0.582457	0.300987	0.229536	0	0.706401	0.633897
CG13096	6	0.516475	0.871671	1	0.773001	0.664897	0.457709	0.450308	0.268279	0.20348	0	0.423876	0.346561
fu12	4	0.918101	0.397386	0	0.0809555	0.314787	0.635938	0.730853	0.629682	0.645673	0.588473	0.91659	1
Glt	4	0.00588628	0	0.0222396	0.0863164	0.186907	0.364138	0.556945	0.814389	0.937396	1	0.929998	0.915672
CG18088	2	0	0.160644	0.437439	0.889064	1	0.703675	0.716768	0.222511	0.0489265	0.11194	0.279756	0.393186
rost	5	0.758517	0.355463	0.14411	0	0.259467	0.275598	0.390314	0.217921	0.356699	0.456158	0.83015	1
Cks30A	6	0.938026	0.746522	1	0.902755	0.717223	0.227126	0.245523	0.0419475	0.0534295	0	0.120834	0.140542
Trx-2	3	0.820519	0	0.192262	0.581683	0.706238	0.83694	0.753808	0.881712	1	0.930425	0.913345	0.963756
GlcAT-S	1	1	0.255168	0.0754067	0	0.106131	0.0228886	0.224095	0.500991	0.442344	0.262088	0.233479	0.310075
CG4364	6	0.123125	0.698053	0.930055	0.884505	1	0.801026	0.502009	0.195837	0	0.0124581	0.514622	0.43357
zf30C	6	0.879539	1	0.929811	0.979652	0.979092	0.80439	0.635808	0.483237	0.268234	0	0.395162	0.275752
Bka	6	0.92618	1	0.953792	0.762686	0.930513	0.975844	0.582525	0.279552	0.214176	0	0.719908	0.616245
CG5850	1	1	0.759705	0.36561	0.672953	0.761969	0.688556	0.78759	0.776931	0.42014	0.0597517	0	0.0805344
CG5853	5	0	0.186945	0.394992	0.617405	0.661267	0.644651	0.661911	0.628596	0.658554	0.765061	1	0.995336
Apf	6	0.513734	0.939586	1	0.804202	0.621762	0.569431	0.446157	0.0419429	0.229443	0	0.134256	0.164078
CG31712	2	0.272218	0.608561	0.777977	1	0.717409	0.53954	0.573417	0	0.154016	0.141362	0.214087	0.253249
Taf11	2	0.86557	0.952716	0.741292	0.986871	1	0.981472	0.701382	0.406328	0.142271	0	0.234036	0.196951
bib	6	0.246393	0.941876	1	0.984064	0.755672	0.513526	0.410528	0.239295	0.0859995	0.094461	0	0.0139072
eEF1delta	2	0.711434	1	0.717655	0.579445	0.64105	0.524363	0.717246	0.183305	0.173614	0	0.209627	0.270375
Ripalpha	2	1	0.925878	0.73378	0.56716	0.53719	0.173985	0.282668	0.0515592	0.0739679	0	0.0996322	0.193607
GATAd	6	1	0.470348	0.310348	0.535319	0.616903	0.268859	0.691767	0.0263674	0.336815	0.0673046	0	0.329607
CG5096	4	0	0.244395	0.253732	0.275428	0.358925	0.654295	0.790779	0.60485	0.826034	0.843548	0.906216	1
da	2	1	0.707544	0.824308	0.895681	0.639425	0.738705	0.517014	0.349381	0.295307	0.404001	0.11344	0
Myo31DF	5	0.605178	0.304899	0	0.273669	0.440173	0.502825	0.586695	0.708633	0.803409	0.907837	0.936051	1
CG7456	2	0.753841	0.712734	0.0651055	0.622192	0.920592	1	0.911264	0.475121	0.347151	0.143869	0	0.125257
Lrr47	1	1	0.60796	0.847367	0.654923	0.579273	0.560762	0.44578	0.202044	0.177297	0.138156	0	0.0869003
CG6415	5	0	0.188804	0.566348	0.692303	0.658884	1	0.988462	0.941164	0.874854	0.813551	0.761291	0.816997
CG6443	6	0.595254	1	0.919847	0.67335	0.648198	0.542439	0.434482	0.271813	0.19324	0.0429167	0	0.0774744
Fatp	5	0.242578	0	0.203557	0.740221	0.760666	0.712896	0.766894	0.798415	0.663645	1	0.75848	0.835293
YL-1	6	0.73585	1	0.87615	0.922232	0.861462	0.655343	0.562575	0.193813	0.193383	0	0.377878	0.316506
Art8	6	0.472346	0.78746	1	0.979127	0.884998	0.855861	0.742881	0.381998	0.149462	0	0.6279	0.595922
CG33129	2	0.850087	0.414474	0.509608	0.767215	0.835259	1	0.919847	0.605706	0.419658	0.154751	0	0.064691
CG4751	6	0.654455	0.80287	1	0.891055	0.731965	0.59761	0.517987	0.395031	0.222008	0.117144	0.0792129	0
CG6201	5	0.734958	1	0.676791	0	0.274406	0.509364	0.723416	0.972896	0.910974	0.675347	0.548501	0.610715
CG6746	5	0.275806	0	0.350286	0.433796	0.338326	0.434654	0.569313	1	0.839161	0.383433	0.0346568	0.0405128
CG6583	2	0.322227	0.256406	0.193066	0.530355	0.747801	1	0.766439	0.43297	0.334481	0.221771	0	0.0454228
CG6712	6	0.763129	0.972551	0.939549	1	0.969377	0.901965	0.679609	0.386605	0.223819	0	0.488849	0.432809
CG5446	6	0.806863	1	0.369558	0.388643	0.457324	0.440013	0.54211	0.227901	0.216014	0.0781663	0	0.10286
CG6153	6	1	0.317519	0.534796	0.503381	0.473162	0.351104	0.318849	0.00796138	0.0642286	0	0.0540063	0.0958512
Vha68-1	4	0	0.188433	0.236054	0.487597	0.601274	0.82811	0.885817	0.961754	0.970354	0.987857	0.966156	1
CG12404	6	1	0.206349	0.464762	0.691472	0.723703	0.704648	0.570477	0.505249	0.410247	0.165818	0.0639577	0
Sir2	6	1	0.600517	0.779928	0.642093	0.478553	0.0857468	0.434539	0.180921	0.199181	0	0.283384	0.429673
CG5287	5	0.909053	0.802877	0.00871087	0	0.295878	0.243684	0.511072	0.559813	0.962543	1	0.283104	0.844777
Pect	3	0.663235	0.558713	0.618618	0.605855	0.835134	0.776529	0.663802	0	0.26838	0.408248	0.874872	1
CG6523	6	0.193881	0.577217	1	0.891334	0.874749	0.714337	0.484108	0	0.0462434	0.0270692	0.0792685	0.200051
Tap42	6	1	0.78815	0.343581	0.187087	0.188841	0.184482	0.155778	0.103648	0.0582225	0	0.178681	0.209138
CG16974	1	0.599718	0.828032	0.96807	1	0.92421	0.788068	0.77091	0.568202	0.486603	0.297787	0	0.100431
CG7099	2	0.847717	1	0.972775	0.863499	0.839648	0.567894	0.528126	0.378591	0.205473	0	0.216889	0.220385
ics	3	0.389641	0.70431	0.333152	0	0.15905	0.350346	0.658627	0.393355	0.843188	0.91312	0.786388	1
B4	1	1	0.930277	0.158234	0.0845417	0.393915	0.394817	0.551483	0.372344	0.374796	0	0.454775	0.368273
CG9293	6	0.872497	0.92927	1	0.948684	0.838799	0.460049	0.631763	0.26716	0.204069	0	0.150002	0.238929
CG31813	4	0.0510822	0.0619696	0	0.407359	0.541337	0.854314	0.81599	1	0.971983	0.68535	0.162414	0.125668
Ance	3	0	0.508073	0.8302	0.967218	0.971113	1	0.908005	0.808932	0.691953	0.716723	0.769502	0.792379
CG16884	4	0.0756234	0.0569328	0	0.0110564	0.124576	0.174119	0.212331	0.56263	0.849661	1	0.902978	0.859946
CG16885	4	0.0980318	0.0669959	0	0.0330524	0.141489	0.154331	0.15271	0.517255	0.842875	1	0.898806	0.871981
CG16886	4	0.0272047	0.076196	0.217968	0	0.111845	0.0616972	0.139538	0.667273	1	0.943611	0.268748	0.346548
Smg5	3	0	0.963762	1	0.651416	0.564506	0.31007	0.431118	0.396808	0.525336	0.634857	0.552356	0.639597
CG4500	3	0	0.796056	1	0.958423	0.923375	0.935005	0.929945	0.732159	0.324673	0.548277	0.425844	0.48356
mol	1	1	0.804674	0.0192956	0	0.247636	0.132895	0.066148	0.329792	0.325187	0.556234	0.605833	0.573443
dyn-p25	2	0.605388	1	0.840705	0.296168	0.304039	0.520026	0	0.150739	0.120846	0.254956	0.376782	0.376507
NC2beta	2	0.341034	0.886574	0.989231	1	0.826039	0.898427	0.571907	0.285855	0.191564	0.329088	0.274547	0
yellow-c	4	0	0.0780002	0.177527	0.113613	0.274073	0.746043	0.783266	0.884762	0.924067	1	0.774325	0.856772
ck	3	0.659924	0.742194	0.0343757	0.276601	0.594689	0.472535	1	0.822689	0.531375	0	0.433353	0.397204
CG3793	2	1	0.226097	0.552035	0.648385	0.404599	0.522332	0.251648	0.124372	0.0950474	0.212812	0.110154	0
Gli	3	0	0.546274	0.801142	0.918686	0.933454	1	0.907313	0.874575	0.873996	0.772594	0.532119	0.579871
CycE	2	1	0.856606	0.816602	0.735689	0.636906	0.389862	0.388388	0.269196	0.147694	0	0.0601703	0.12941
BicC	1	1	0.41022	0.219532	0.128327	0.148385	0.00586773	0.0663589	0.144869	0	0.0380681	0.00663649	0.0476475
CG4935	2	1	0.738321	0.425248	0.653971	0.681489	0.619646	0.452771	0.297522	0.132338	0.0600407	0	0.135788
fzy	2	0.741363	0.913355	1	0.862893	0.755039	0.498763	0.37678	0.292559	0.205085	0	0.331597	0.315765
CG4455	6	0.261906	0.622476	0.977035	1	0.925812	0.648533	0.726604	0.240711	0.216808	0	0.0603682	0.152094
chif	6	0.79348	1	0.973169	0.841156	0.821468	0.287	0.785714	0.381917	0.346725	0	0.490197	0.511684
CG5869	6	0.0251262	0.519569	1	0.69678	0.658493	0.709437	0.633481	0.0758335	0.167157	0.0600113	0	0.169566
heix	6	0.833981	0.970087	0.602375	0.775633	1	0.899061	0.88323	0.551731	0.414196	0	0.435057	0.447146
CG5888	6	0	0.806389	1	0.798876	0.690873	0.543185	0.649392	0.342082	0.358983	0.263295	0.0913401	0.241939
grp	2	1	0.63732	0.664795	0.539636	0.397997	0.347406	0.228499	0.15038	0.0614394	0	0.101149	0.119401
yellow-b	4	0	0.00989804	0.0108277	0.163605	0.34636	0.661243	0.73154	0.786889	0.990837	1	0.819153	0.859037
Ugt36Ba	5	0	0.208574	0.576116	0.534817	0.594473	0.510543	0.606309	0.704052	1	0.959787	0.809601	0.934905
Ugt36Bc	3	0	0.297793	0.664826	0.665835	0.706893	0.822395	0.799371	0.798343	0.921239	0.987857	1	0.982212
CG13284	4	0	0.0104882	0.0553948	0.334991	0.52548	0.774304	0.878828	0.958859	1	0.998425	0.938676	0.904793
Cyt-b5-r	3	0	0.394215	0.757476	0.942671	0.908253	0.663533	0.518498	0.588692	0.770565	0.787886	0.883916	1
CG17996	3	0.608934	0.142292	0	0.152214	0.334365	0.587083	0.506498	0.71965	0.803049	0.797597	1	0.973395
CG12288	6	0.827393	0.717255	0.695954	0.919129	1	0.915875	0.947032	0.259831	0.265262	0	0.337259	0.257942
CG15141	6	0.805757	1	0.835209	0.702386	0.610427	0.323516	0.34291	0.26759	0.204644	0	0.380737	0.353293
qua	5	1	0.407392	0	0.0744542	0.295872	0.695999	0.99181	0.903707	0.66674	0.335413	0.092759	0.15603
CG10211	4	0.0221555	0	0.0237006	0.138317	0.205874	0.317145	0.563483	1	0.933844	0.596316	0.560496	0.536178
CG15160	6	0.916994	0.735409	1	0.958092	0.861055	0.719934	0.651262	0.314971	0.219683	0	0.315004	0.222161
Cyp310a1	6	0	0.871037	1	0.768205	0.878557	0.874661	0.927289	0	0	0	0	0
CG10283	5	0	0.72826	0.738696	0.826266	0.866669	0.823686	0.880372	1	0.604603	0.354129	0.281231	0.326336
ncm	6	0.7186	1	0.986997	0.755897	0.751877	0.488319	0.614377	0.320399	0.286662	0	0.483614	0.471927
CG31751	3	0.251718	0	0.142349	0.261438	0.358163	0.464574	0.704009	0.602179	1	0.9105	0.582095	0.749129
CG10336	6	1	0.799713	0.836371	0.769209	0.668475	0.51282	0.349166	0.317989	0.193878	0.0564557	0	0.0511762
CG10338	2	1	0.714735	0.698367	0.529156	0.56896	0.767198	0.708363	0.507422	0.350808	0.140147	0	0.0957288
Grip71	2	1	0.593455	0.522745	0.524853	0.523586	0.466661	0.308996	0.242938	0.157923	0	0.0430484	0.106625
CG17323	5	0	0.058529	0.0691726	0.591496	0.819498	1	0.917691	0.763839	0.669072	0.75154	0.752621	0.803653
CG10376	2	0.57077	0.791896	1	0.672599	0.464101	0.155521	0.269229	0.114491	0.305201	0.15794	0	0.191116
msl-1	6	1	0.861576	0.731109	0.689393	0.665008	0.335559	0.535536	0.415794	0.327869	0	0.420333	0.45196
l(2)37Cd	6	1	0.932793	0.547636	0.556903	0.563286	0.351402	0.370652	0.36725	0.264226	0	0.345192	0.363504
l(2)37Cg	6	0.218412	0.49228	0.672024	1	0.972767	0.943211	0.922675	0.14163	0.102899	0	0.7893	0.629556
hk	6	0.772112	1	0.986233	0.691366	0.791389	0.773192	0.838201	0.291146	0.22192	0	0.563552	0.463522
drl	5	0	0.533749	0.811221	0.948243	0.975651	0.92836	1	0.823073	0.687026	0.613402	0.480181	0.532384
Rab9	4	1	0.149294	0	0.327737	0.497609	0.568714	0.472289	0.663164	0.73976	0.779257	0.833512	0.796428
CG17549	4	0	0.0556342	0.168148	0.276522	0.351015	0.516105	0.530608	0.440412	0.208143	0.572134	1	0.981991
msb1l	6	0.656205	0.842087	1	0.898784	0.720225	0.418022	0.306598	0.274174	0.190187	0	0.346615	0.323377
CdGAPr	6	0.714158	0.747689	0.921964	1	0.972437	0.518775	0.932144	0.956221	0.485485	0	0.0588392	0.129709
neb	6	0.839062	0.908243	1	0.859448	0.677883	0.49983	0.25892	0.395784	0.445897	0.224962	0	0.0152274
Taf13	2	0.65581	1	0.851278	0.826329	0.83262	0.641638	0.732569	0.220579	0.285855	0	0.31999	0.476907
vls	6	0.742457	0.879089	1	0.879334	0.728994	0.599713	0.365704	0.371831	0.223244	0.163364	0.0463792	0
Pomp	2	0.96203	1	0.596497	0.405626	0.44988	0.336632	0.296244	0.297291	0.153036	0	0.0843869	0.0529718
CG9336	4	0	0.0158823	0.0917758	0.508777	0.643444	0.880362	0.879473	0.881376	0.850188	0.889925	1	0.995744
CG9338	4	0	0.0180831	0.0327553	0.279385	0.409463	0.67576	0.73953	0.733204	0.697462	0.855553	0.987428	1
CG9246	6	0.75063	1	0.711821	0.693417	0.737107	0.532744	0.591995	0.253627	0.267298	0	0.70883	0.661859
Mcm10	2	1	0.878245	0.757805	0.62627	0.649374	0.431234	0.464669	0.342981	0.357049	0	0.560234	0.561974
E2f2	6	0.94633	0.575806	1	0.92745	0.864353	0.759598	0.660122	0.369275	0.237598	0.101609	0	0.0766439
nrv3	4	0	0.0182165	0.0336272	0.0667534	0.167941	0.318727	0.615627	0.564092	0.818677	0.833808	0.904578	1
alpha-Est1	1	1	0.842596	0.0576478	0	0.287514	0.281262	0.143489	0.494871	0.577035	0.755798	0.986585	0.989637
CG1142	6	0.449069	0.78596	1	0.993989	0.80374	0.604713	0.659207	0.154571	0.073852	0	0.20943	0.271854
CG10098	3	1	0.389185	0	0.0322583	0.377611	0.907499	0.652518	0.616265	0.545472	0.547646	0.393316	0.347829
CG2656	6	0.966753	0.980272	0.968297	1	0.942294	0.74868	0.488708	0.478712	0.203945	0	0.453162	0.330871
Sas-4	2	1	0.629119	0.987121	0.950729	0.754115	0.48856	0.339474	0.15725	0.048119	0.053343	0	0.0474078
sas	5	0	0.341659	0.559717	0.638595	0.784417	0.850593	0.860286	0.952351	1	0.833059	0.540935	0.561075
CG10050	6	1	0.277532	0.72606	0.665277	0.641903	0.556381	0.59019	0.248347	0.227718	0	0.259776	0.193302
CG1234	6	0.484281	0.851349	1	0.86718	0.901769	0.694356	0.677964	0.308432	0.221061	0	0.691021	0.643616
CG10055	2	1	0.428328	0.10677	0.2746	0.321836	0.435631	0.316824	0.237385	0.192062	0.0558695	5.09706e-06	0
CG10068	1	0.954152	0.190704	0.640224	0.821336	0.756872	1	0.667904	0	0.104133	0.252178	0.164875	0.199131
Mlp84B	4	0	0.253556	0.217745	0.315337	0.326908	0.49193	0.623246	0.895121	0.955232	1	0.932758	0.900371
Ama	6	0.152503	0.676906	0.918589	1	0.908939	0.817119	0.711843	0.510941	0.252567	0.158197	0	0.0569036
Ccp84Ag	4	0.0913164	0.0760173	0	0.037744	0.137104	0.123784	0.124645	0.67491	0.904478	1	0.682086	0.618425
Ccp84Ae	4	0.0475896	0.0846453	0	0.0167202	0.11294	0.0878908	0.0538158	0.441335	0.772774	1	0.465244	0.45975
Osi20	4	0.0830825	0	0.0365169	0.141026	0.266368	0.344911	0.548349	0.97577	1	0.632887	0.136655	0.190218
Neurochondrin	4	0	0.01295	0.0291356	0.382378	0.499253	0.9341	0.979905	1	0.903994	0.675163	0.471968	0.51852
Sp7	1	1	0.8554	0.336152	0.0464662	0.115613	0.0445379	0	0.161171	0.268063	0.565798	0.983987	0.967432
Taf7	6	1	0.959785	0.799429	0.785948	0.801761	0.630073	0.602962	0.280713	0.24817	0	0.47008	0.470746
CG2846	3	0.480824	0	0.353419	0.313787	0.328759	0.452689	0.382049	0.561676	0.633685	0.741093	0.939711	1
CG2943	2	0.858258	1	0.634577	0.684116	0.758603	0.712888	0.621935	0.61311	0.434739	0.184132	0.025654	0
pyd3	5	0	0.435373	0.641002	0.732797	0.723666	0.755049	0.72191	0.717815	0.874156	1	0.926066	0.919113
CG10903	2	0.464157	0.78882	1	0.868156	0.901584	0.869939	0.721077	0	0.197533	0.177717	0.662279	0.763356
CG11035	1	0.93379	0.766212	0.16119	0.236511	0.381147	0.412363	0.321238	0	0.211828	0.70399	0.876343	1
CG9630	2	0.524981	0.242317	0.81079	1	0.915308	0.830177	0.719819	0.134846	0	0.0839279	0.811527	0.703575
CG8202	2	1	0.541809	0.76762	0.897817	0.843029	0.731784	0.704998	0.323639	0.201367	0.0612375	0	0.0728345
CG9839	6	0	0.804253	1	0.960275	0.87637	0	0	0	0	0	0	0
CG9773	6	1	0.796826	0.619433	0.651597	0.730732	0.840229	0.779187	0.373998	0.318893	0	0.0815431	0.309638
osk	1	1	0.475055	0.264703	0.121189	0.230251	0.0683955	0.130934	0.153031	0.0370847	0.074111	0	0.0896231
CG11970	6	0.817661	1	0.804145	0.934459	0.80821	0.453311	0.611542	0.40341	0.223209	0	0.427929	0.299075
tgo	6	0.430305	1	0.944184	0.838937	0.709315	0.498238	0.672703	0.494344	0.268402	0.0238968	0.0474276	0
CG11985	6	0.575091	0.934099	1	0.829606	0.743734	0.836207	0.828574	0.259677	0.118098	0.0471168	0	0.0870405
alpha-Man-II	2	1	0.354106	0.465638	0.800709	0.769679	0.714199	0.687878	0.53684	0.35032	0.172284	0	0.0710853
CG9356	6	0.863781	1	0.771585	0.74483	0.822597	0.943783	0.680557	0.429994	0.263325	0	0.00226122	0.0726318
Rlb1	6	0.644894	0.952022	0.965048	1	0.90349	0.684592	0.937903	0.16493	0.128434	0	0.440347	0.468689
MBD-like	6	0.766561	1	0.76752	0.922689	0.914993	0.890828	0.729832	0.552508	0.247585	0.00559241	0.179843	0
alphaTub85E	4	0	0.00804055	0.0187717	0.271566	0.409592	0.820434	0.846197	0.975409	0.95363	1	0.951844	0.916706
Scm	2	1	0.521659	0.471376	0.586391	0.541942	0.509831	0.37859	0.310871	0.151385	0.0385234	0.0268805	0
RhoL	5	0	0.287009	0.596825	0.703547	0.710612	0.819357	0.889207	0.908986	0.85727	0.899506	0.977081	1
Pnn	6	0.975722	0.888425	0.929838	0.890119	1	0.851023	0.915886	0.28397	0.355649	0	0.401743	0.564234
CG8417	3	0	0.0304523	0.423396	0.507944	0.522473	0.671274	0.680318	0.541309	0.596335	0.702959	0.928385	1
Snap24	3	0.785364	0.645743	0	0.310579	0.61852	0.589807	0.511	0.80506	0.773207	1	0.920063	0.848904
CG12811	4	0.933125	0.0857211	0	0.371494	0.567266	0.836172	0.907625	1	0.998545	0.912529	0.823835	0.826865
Mical	3	0.923262	0	0.481487	0.461049	0.572449	0.235552	1	0.754572	0.513352	0.608516	0.110735	0.0904662
CG3999	5	0	0.279715	0.718317	0.733794	0.572065	0.727228	0.833745	0.844134	0.784311	0.802258	0.888824	1
CG6293	1	1	0.359974	0.0582253	0	0.0680435	0.141829	0.220907	0.35839	0.384033	0.451157	0.435921	0.456567
hth	3	0	0.797654	1	0.931572	0.922524	0.820562	0.958552	0.722376	0.755344	0.728269	0.670758	0.722425
pug	5	0	0.275891	0.184541	0.0445078	0.0102645	0.526066	0.294841	0.230165	0.149421	0.433538	0.947111	1
CG4570	2	1	0.930876	0.595652	0.54859	0.550511	0.431075	0.290888	0.280194	0.230729	0	0.297214	0.313152
SelR	3	0.618877	0.345766	0	0.180303	0.17552	0.0861023	0.296819	0.757864	0.675961	0.988732	0.989671	1
CG6621	6	1	0.949713	0.693263	0.709951	0.677564	0.449029	0.43997	0.329173	0.110133	0	0.248316	0.185065
CG17734	4	0.948409	0.358253	0.196396	0	0.133438	0.292731	0.354332	0.281934	0.393114	0.637973	0.930116	1
CG17187	2	0.946515	0.785841	1	0.819373	0.661021	0.605097	0.368398	0.131842	0	0.0355308	0.0517399	0.0722797
CG6744	2	1	0.608748	0.84563	0.74942	0.66919	0.638113	0.492776	0.332198	0.182826	0.114964	0	0.0364496
CG14722	6	0.45479	0.849365	1	0.862568	0.826244	0.728339	0.607291	0.320013	0.243156	0	0.423425	0.368128
CG6791	2	1	0.961056	0.964381	0.959008	0.954978	0.686061	0.530477	0.618423	0.417134	0	0.589649	0.386818
CG18547	5	0.273275	0.381152	0.27145	0	0.105071	0.178444	0.119253	0.132628	0.208025	0.514381	0.927357	1
CG10005	2	0.0162453	0.181935	0.338183	0.719983	0.852647	1	0.974303	0.353508	0.0147415	0.0321626	0	0.0612182
CG6959	5	0	0.0504007	0.0600596	0.389624	0.666956	1	0.963671	0.919577	0.804319	0.659956	0.628412	0.630329
Lk6	6	0.845747	1	0.731196	0.593295	0.540858	0.00374739	0.302991	0.286979	0.101098	0	0.231692	0.287182
CG3313	6	1	0.739707	0.821378	0.743642	0.715777	0.795586	0.493436	0.410983	0.186652	0.029005	0.0140215	0
CG4115	4	0.0452197	0	0.0179006	0.165719	0.302837	0.438412	0.661093	0.981556	1	0.938043	0.46609	0.548443
GstD3	3	0.760287	0.0255287	0	0.28996	0.607841	1	0.920503	0.579387	0.345195	0.278037	0.516185	0.600645
GstD5	5	0	0.187548	0.414991	0.359171	0.522244	0.761424	0.531547	0.184961	0.156766	0.367394	0.923396	1
Cyp9f2	5	0	0.0783953	0.0936418	0.353757	0.646224	1	0.898352	0.593902	0.521286	0.717123	0.955308	0.975547
lig3	6	1	0.780324	0.627217	0.53999	0.580888	0.482358	0.637602	0.244397	0.22815	0	0.067513	0.289977
CG10035	2	0.438703	0.902754	1	0.796932	0.565241	0.2798	0.120148	0.172072	0	0.216392	0.0954306	0.210158
Men	4	0.471821	0	0.0312762	0.467655	0.532396	0.552201	0.512507	0.589633	0.688009	0.823782	0.990117	1
mus308	2	0.63048	0.652706	1	0.896297	0.746261	0.360768	0.280409	0.0802629	0.0102134	0.00351675	0	0.0246125
Su(fu)	6	0.807802	0.990097	1	0.792324	0.699282	0.61934	0.433755	0.427354	0.232502	0	0.191808	0.199453
Spc25	6	0.858931	1	0.873797	0.877826	0.831801	0.686087	0.518888	0.275751	0.360841	0	0.358017	0.319749
Cyp304a1	4	0	0.121628	0.129098	0.193607	0.194997	0.348826	0.555305	0.874999	1	0.836548	0.457015	0.385858
ry	5	0	1	0.923758	0.608555	0.488523	0.557394	0.619041	0.848223	0.958772	0.823649	0.533705	0.572494
Su(var)3-7	6	0.980574	1	0.714701	0.633388	0.664309	0.448648	0.449805	0.439426	0.30692	0	0.436633	0.392908
yellow-e3	2	0.130414	0.68472	0.87628	0.880263	0.936493	1	0.777316	0.288063	0.0516902	0.124602	0	0.0110485
yrt	6	0.891801	1	0.871008	0.744621	0.756747	0.362837	0.570484	0.288095	0.204381	0	0.183674	0.310714
lkb1	1	1	0.539915	0.285702	0.447205	0.372024	0.410056	0.214103	0.224484	0.109862	0	0.0719813	0.00138663
CG9288	2	0.72766	1	0.767287	0.391326	0.575396	0.653273	0.623129	0.403932	0.355635	0	0.476521	0.554182
CG9588	6	0.806881	0.14875	0.894067	1	0.817125	0.801805	0.497413	0.315232	0.198106	0.129624	0.0386833	0
CG9922	6	1	0.234688	0.781621	0.743029	0.789161	0.826312	0.689481	0	0.310943	0.265645	0.569608	0.549355
RpII15	6	0.763315	1	0.817545	0.68314	0.716646	0.570728	0.488522	0.519277	0.296113	0	0.294749	0.295365
CG31320	6	0.931515	1	0.340371	0.20913	0.60774	0.518128	0.721655	0.330693	0.316677	0	0.206108	0.335918
su(Hw)	6	0.734561	1	0.843932	0.947255	0.916673	0.85449	0.695963	0.424185	0.275014	0	0.478651	0.377452
CG33331	1	1	0.0995171	0.336708	0.377648	0.31494	0.547873	0.484328	0.382184	0.331907	0.0659259	0	0.00270058
CG33332	2	0.852723	1	0.73	0.56451	0.607571	0.507913	0.51616	0.288392	0.253436	0	0.564129	0.519782
CG3817	6	0.560899	0.824437	0.896441	1	0.801868	0.676861	0.600583	0.0607447	0.139722	0	0.430601	0.301569
CG7265	6	0.233256	0.721721	1	0.867604	0.746842	0.678194	0.562063	0.327117	0.172002	0.107667	0	0.0570772
CG4203	6	0.84701	1	0.755033	0.629665	0.586033	0.468594	0.325571	0.376867	0.214308	0	0.497605	0.3277
Caf1	2	0.824071	1	0.878732	0.753059	0.665499	0.439196	0.358391	0.401128	0.308159	0	0.499128	0.406889
CG4338	2	1	0.190779	0.182276	0.558134	0.534438	0.69073	0.402808	0.231011	0.0348331	0	0.0294298	0.0573411
Tm2	5	0.0679408	0.0456353	0	0.138673	0.264975	0.488649	0.62125	0.810526	0.924604	1	0.968989	0.962489
ear	6	0.877289	1	0.339378	0.476091	0.540632	0.307891	0.433371	0.285362	0.163237	0	0.575782	0.416365
ea	1	1	0.99347	0.279114	0	0.127437	0.0362855	0.163827	0.289733	0.0753784	0.325194	0.491398	0.379906
CG31301	6	0.721989	1	0.979244	0.899642	0.797926	0.507511	0.631354	0.307729	0.254373	0	0.46375	0.479929
CG6218	4	0.0351169	0	0.0147534	0.592768	0.629185	0.93464	0.886353	1	0.968441	0.935352	0.856696	0.884963
CG6654	6	1	0.859935	0.769912	0.79727	0.674634	0.526942	0.484494	0.355378	0.154272	0.114558	0	0.0401663
Act88F	4	0	0.245495	0.459725	0.272506	0.713519	0.169863	0.41542	0.240809	1	0.739936	0.399491	0.195718
CG5516	6	0.861928	0.933925	1	0.750943	0.738628	0.709473	0.531261	0.281977	0.276685	0	0.206661	0.192956
Rbf2	6	1	0.863007	0.929514	0.772543	0.610162	0.347139	0.292997	0.172551	0.103203	0.0073692	0	0.0619167
srp	2	0	0.903444	0.981956	1	0.879392	0.76122	0.736928	0.722414	0.618637	0.673754	0.428371	0.349828
GATAe	4	0	0.186095	0.518147	0.681935	0.657453	0.786211	0.907654	1	0.901167	0.862195	0.764502	0.708783
CG10407	1	0	0.596639	1	0.74863	0.822631	0.760018	0.669362	0.258054	0.190752	0.235191	0.618546	0.687042
CG4287	2	1	0.881466	0.491433	0.327316	0.5505	0.534889	0.484066	0.343514	0.461045	0	0.433552	0.48381
glob1	3	0.178032	0.246248	0	0.719938	0.898295	0.902006	1	0.892325	0.844256	0.723993	0.671305	0.826131
sra	2	1	0.790082	0	0.0371777	0.225627	0.193148	0.136751	0.111184	0.176526	0.142182	0.394617	0.42493
CG6126	4	0.465574	0	0.0688462	0.456609	0.549948	0.563201	0.408396	0.373718	0.665317	0.929035	1	0.957426
CG14883	1	0.864164	0.251495	0.0268047	0.116823	0.491792	0.600064	1	0.53363	0.400897	0.0372091	0	0.189109
Dhfr	3	1	0	0.138055	0.1776	0.401108	0.901464	0.693871	0.668427	0.616927	0.516228	0.593925	0.57645
CG14903	6	1	0.719479	0.334184	0.301937	0.105829	0.174018	0.327401	0	0.139764	0.013453	0.227964	0.246997
Pak3	6	0.551962	0.785686	1	0.707282	0.652939	0.574735	0.742408	0.108799	0	0.10759	0.0063309	0.0295127
CG14894	6	0.925117	1	0.388212	0.0159812	0.254398	0.441511	0.549624	0.145753	0.167205	0	0.161871	0.168105
Ubx	5	0	0.345533	0.710339	1	0.951386	0.90245	0.983637	0.749428	0.760205	0.687746	0.555172	0.616376
CG10324	2	0.713036	1	0.897624	0.758089	0.734052	0.508816	0.60151	0.101899	0.123832	0	0.23144	0.384308
Irc	4	0	0.117199	0.290728	0.739201	0.881002	0.973328	1	0.876335	0.860387	0.762889	0.775811	0.857821
abd-A	5	0	0.453455	0.740817	0.981658	0.997605	0.867559	1	0.855025	0.7949	0.781215	0.683259	0.707994
CG5220	6	0.790698	1	0.915462	0.793466	0.792899	0.687915	0.693023	0.0484337	0.212314	0	0.387887	0.443122
Det	6	0.801574	0.846386	1	0.955327	0.911723	0.605136	0.531782	0.209033	0.170343	0	0.125475	0.220241
TwdlW	4	0.083344	0.0172296	0	0.0215253	0.131197	0.0873705	0.173378	0.677733	1	0.941396	0.356948	0.392766
CG3995	6	0.854069	1	0.876594	0.882465	0.897598	0.736332	0.723384	0.248481	0.319194	0	0.672832	0.636205
CG5873	4	0	0.0180578	0.0271302	0.182845	0.329408	0.672817	0.881949	0.909427	1	0.708553	0.102376	0.15866
SF1	6	0.745717	0.934415	1	0.899901	0.750021	0.672327	0.498269	0.448734	0.200549	0.00176081	0.0295738	0
ald	2	1	0.587025	0.749748	0.73742	0.584581	0.344609	0.322702	0.142305	0.0748104	0.0442328	0	0.0244237
CG7655	3	0	0.157035	0.792691	1	0.909582	0.922545	0.806797	0.641594	0.52751	0.540851	0.317484	0.409247
l(3)07882	6	0.731175	1	0.831554	0.768166	0.78342	0.470107	0.524364	0.267016	0.204243	0	0.674133	0.616647
CG7379	2	1	0.604229	0.508219	0.705406	0.549272	0.425881	0.348057	0.199483	0.041452	0.0169125	0.0094778	0
CG14317	2	0.609156	1	0.394024	0.118471	0.14355	0.0627984	0.0553481	0.0435966	0.00862495	0.0402537	0	0.162277
Dlc90F	6	0.698989	1	0.75961	0.420105	0.485893	0.376126	0.269077	0.16143	0.185517	0	0.132246	0.200582
CG14309	4	0	0	0	0.185055	0.336415	0.772314	1	0.309616	0.219818	0.475554	0.290365	0.563869
CG7675	4	0.0382501	0	0.0230739	0.373945	0.465085	0.942602	0.937959	1	0.976523	0.810382	0.534443	0.590825
PKD	4	0	0.0458298	0.0885695	0.459788	0.680987	0.941831	1	0.935442	0.671584	0.765165	0.617824	0.618607
l(3)05822	1	1	0.893373	0.342342	0.444879	0.390054	0	0.0479242	0.316695	0.16569	0.0736282	0.356635	0.0929442
cdm	6	0.873442	1	0.349279	0.363499	0.480627	0.578471	0.409131	0.468228	0.307049	0	0.326834	0.257541
CG7218	1	1	0.756675	0.582389	0.60694	0.657432	0.692758	0.533592	0.376469	0.183517	0.065638	0	0.0675383
CG7685	2	1	0.515319	0.565741	0.69552	0.686726	0.854035	0.61546	0.617503	0.26301	0.184209	0.0633094	0
CG31122	2	1	0.551175	0.695988	0.585798	0.518803	0.32875	0.511075	0.592373	0.34847	0.095082	0.0747391	0
CG7702	5	0	0.282254	0.364904	0.72686	0.884381	0.959394	1	0.984293	0.958282	0.871828	0.810312	0.844275
gwl	1	1	0.681822	0.613527	0.491307	0.581687	0.357081	0.341903	0.384935	0.327579	0	0.463546	0.480055
CG14291	5	0	0.341735	0.696612	0.782861	0.847111	0.97137	1	0.831944	0.4975	0.302545	0.0980485	0.140268
Dl	2	0.584928	0.822099	1	0.896565	0.70202	0.484991	0.425469	0.35857	0.151463	0	0.109958	0.0976063
Ino80	6	0.779458	1	0.939083	0.786998	0.724964	0.469515	0.525667	0.386665	0.233204	0	0.467967	0.384115
CG11447	2	0.810344	0.393902	1	0.958656	0.76531	0.874616	0.572294	0.455631	0.418504	0.209117	0	0.14662
CG4936	6	0.967894	1	0.995018	0.957558	0.848685	0.646518	0.472638	0.472013	0.265853	0	0.196082	0.198677
mira	2	0.128694	0.910688	0.973444	1	0.913794	0.788505	0.571727	0.447095	0.271005	0.224225	0	0.0229463
CG4360	2	1	0.856311	0.592259	0.825159	0.744326	0.558953	0.566958	0.396608	0.161125	0.0874795	0.192465	0
CG5191	5	0.377243	0.463544	0.598899	0.143405	0	0.279664	0.491939	0.994833	1	0.786326	0.321743	0.31282
CG17272	5	0.448406	0	0.355446	0.660334	0.600164	0.808865	1	0.67027	0.385573	0.0538217	0.450638	0.787406
rtet	2	1	0.940768	0.480871	0.0852314	0.355807	0.650434	0.786813	0.80893	0.474808	0	0.549606	0.445198
mod(mdg4)	6	0.843638	1	0.792013	0.858903	0.720967	0.578438	0.399916	0.360347	0.180009	0	0.22371	0.0640093
mod(mdg4)	2	0.843638	1	0.792013	0.858903	0.720967	0.578438	0.399916	0.360347	0.180009	0	0.22371	0.0640093
mod(mdg4)	2	0.843638	1	0.792013	0.858903	0.720967	0.578438	0.399916	0.360347	0.180009	0	0.22371	0.0640093
CG16791	5	0	0.314823	0.578141	0.834442	0.925912	0.988552	1	0.949775	0.87229	0.836315	0.737096	0.72186
CG3353	3	0.497935	0	0.721271	0.994151	1	0.98273	0.595773	0.372695	0.287486	0.32445	0.906257	0.732426
CG7956	6	0.393749	0.53944	1	0.443262	0.243359	0	0.15159	0.0907874	0.390738	0.528451	0.244591	0.43426
InR	5	0	0.12701	0.463763	0.392459	0.64702	0.415059	1	0.643154	0.403512	0.350904	0.724552	0.901687
CG31233	4	0.0194037	0.00903542	0	0.015905	0.0513468	0.0361984	0.0474048	0.330511	0.698222	0.912452	1	0.999122
CG31198	4	0.0120846	0.0027755	0	0.0268669	0.046811	0.0690989	0.101039	0.422073	0.712427	0.890606	1	0.991104
tsl	4	0	0.128647	0.283845	0.380611	0.578774	0.899099	0.814099	0.490097	0.743306	1	0.584862	0.655458
RpI12	2	0.73102	0.0710881	0.669395	0.980143	0.90378	0.632856	0.640111	0.0801055	0.08538	0	1	0.809548
pit	6	0.667854	0.957875	1	0.901761	0.838263	0.782893	0.619863	0.226847	0.119019	0	0.430898	0.401004
how	5	0	0.37688	0.452824	0.540609	0.676906	0.646887	1	0.904522	0.807149	0.684655	0.134464	0.163068
CG5380	2	1	0.685976	0.692259	0.700914	0.807417	0.957576	0.655355	0.33536	0.131891	0	0.296192	0.325304
CG7054	3	0.494337	0.672621	0.595314	0.00970291	0.0112505	0	0.0763862	0.200384	0.520089	0.698536	0.908316	1
CG31156	6	1	0.602615	0.871836	0.734616	0.638146	0.538188	0.583772	0.384489	0.163393	0	0.0497665	0.103506
CG33099	3	0	0.445564	0.661496	0.905001	0.965272	1	0.964144	0.679931	0.521224	0.382549	0.297364	0.369635
HP1c	2	0.789941	0.986065	0.98722	1	0.920361	0.898199	0.638567	0.510894	0.31473	0.200554	0	0.0468124
CG4721	4	0	0	0	0	0	0	0	0.582249	0.848472	1	0.950406	0.986164
Gclm	3	1	0.579048	0	0.0669269	0.340263	0.62661	0.563741	0.881859	0.747175	0.571853	0.636555	0.615253
CG17109	4	0	0.0164286	0.00125613	0.0439805	0.107057	0.235535	0.31585	0.512104	0.649539	0.751554	1	0.99165
EloA	6	1	0.986185	0.850596	0.590657	0.596106	0.388172	0.499785	0.310437	0.249897	0	0.551432	0.507576
wda	6	1	0.756992	0.742373	0.673016	0.551316	0.379174	0.328888	0.203838	0.107791	0.0952064	0	0.0693472
unk	6	0.75173	1	0.282201	0.455908	0.626621	0.646733	0.428556	0.456489	0.256143	0	0.537684	0.4371
CG31457	2	1	0.725962	0.61467	0.524723	0.576669	0.508315	0.363583	0.279285	0.182868	0	0.202368	0.206034
CG31365	6	0.854538	1	0.934262	0.903079	0.819732	0.628487	0.507748	0.330602	0.227653	0	0.500183	0.406359
SPE	4	0	0.0836782	0.156121	0.559115	0.670299	1	0.920386	0.954576	0.83933	0.741521	0.616347	0.504445
Hmgcr	4	0.41872	0	0.0181861	0.204746	0.282069	0.381393	0.498452	1	0.977758	0.711782	0.265748	0.227196
Lsd-1	4	0	0.177508	0.132463	0.501631	0.811014	0.949628	0.932002	0.796277	0.593867	0.682382	0.91824	1
CG10254	1	1	0.0893607	0.144526	0.211515	0.232005	0.204044	0.293689	0.158317	0.189757	0.185986	0	0.0363905
CG5854	6	0.713139	0.962397	1	0.898816	0.795089	0.764389	0.692327	0.358088	0.188191	0.00503715	0.210792	0
AP-1sigma	6	1	0.908884	0.306072	0.454115	0.783555	0.75457	0.973707	0.377596	0.639294	0	0.265413	0.588815
CG5902	3	0.138739	0.595634	0.809429	0.947906	0.947044	1	0.848177	0.787799	0.65324	0.431507	0	0.0067851
KrT95D	5	0.910008	0	0.133658	0.517481	0.410848	0.423585	0.43659	0.558034	0.670585	1	0.360762	0.31032
Pli	6	0.562733	0.51376	0.825843	0.889152	0.949079	1	0.957011	0.831322	0.720226	0.385471	0	0.133752
CG5986	2	0.781346	1	0.872098	0.713993	0.639653	0.526587	0.537359	0.0896274	0.150509	0	0.155886	0.161233
Tsc1	6	0.891491	1	0.155576	0.185165	0.366858	0.265424	0.296238	0.311461	0.197496	0	0.153268	0.0938879
Apc2	6	0.950732	1	0.736319	0.684668	0.654555	0.440936	0.363948	0.2867	0.174756	0	0.0463263	0.16189
CG6204	2	1	0.307218	0.702975	0.623996	0.344421	0.019603	0.224375	0	0.224404	0.0294079	0.165269	0.154628
Orct2	2	0	0.388074	0.81948	1	0.864881	0.695374	0.541106	0.401795	0.341859	0.261146	0.185484	0.207223
Orct	5	0	0.285306	0.628118	1	0.972224	0.94997	0.927758	0.996955	0.904371	0.5078	0.388798	0.373047
CG6356	4	0	0.134892	0.334443	0.891096	1	0.852531	0.880287	0.778378	0.666269	0.923593	0.915045	0.984082
CG6364	6	0.527509	0.194881	0.522909	0.615058	0.720276	1	0.927924	0	0.0941189	0.114374	0.356371	0.420957
CG5746	6	1	0.797506	0.813284	0.906642	0.772935	0.646498	0.644686	0.561893	0.381942	0.283426	0.0135768	0
CG6607	6	0.64953	0.344002	0.802343	0.941698	0.905289	1	0.710267	0.494606	0.251369	0.29184	0.0217132	0
CG13625	2	1	0.89647	0.781471	0.698941	0.575184	0.451228	0.427539	0.239903	0.134918	0.115181	0	0.0508816
asp	2	1	0.791954	0.930952	0.838808	0.705375	0.351292	0.339873	0.202558	0.111664	0	0.175649	0.140456
CG31381	2	0	1	0.946392	0.954431	0.906058	0.768733	0.789988	0.686617	0	0	0.762536	0.719085
CG11069	5	0	0.0721163	0.173168	0.658586	0.900905	0.969347	1	0.787424	0.560369	0.536398	0.429537	0.470436
CG31121	5	0	0.11899	0.182285	0.700901	0.887281	1	0.893063	0.764161	0.532371	0.634357	0.501277	0.443603
CycB3	2	0.839887	1	0.999496	0.906387	0.739049	0.455679	0.37306	0.349465	0.254821	0	0.543248	0.415999
RabX4	5	0	0.43674	0.713847	0.7344	0.821695	1	0.977402	0.898221	0.833097	0.767359	0.632048	0.700469
polybromo	6	0.797669	1	0.940429	0.767633	0.624755	0.30555	0.375828	0.345351	0.245259	0	0.509976	0.400978
CG5805	4	0.870312	0.177705	0	0.201846	0.377978	0.518235	0.59026	0.551913	0.642954	0.846236	0.960347	1
Nmnat	5	1	0.349052	0	0.415534	0.524736	0.632508	0.613593	0.52701	0.602378	0.775775	0.929541	0.997333
veli	3	0.852651	0	0.238717	0.213311	0.497073	1	0.804623	0.541172	0.567991	0.480564	0.236705	0.421298
ssh	2	1	0.609474	0.352544	0.473083	0.411147	0.353732	0.341409	0.291129	0.16792	0.260395	0.0717094	0
CG31108	2	0.983869	1	0.357216	0.301145	0.468977	0.324553	0.658341	0.291728	0.396724	0	0.582547	0.624448
dan	2	0.0638287	0.944297	1	0.358234	0.175978	0.188238	0.168836	0.102942	0.040161	0.0735342	0	0.0132533
CG4743	4	0.507502	0	0.668083	0.434066	0.353218	1	0.942265	0.757705	0.890647	0.685228	0.62627	0.576345
TwdlD	4	0.115908	0.037972	0	0.0132353	0.191475	0.229054	0.219721	0.654739	1	0.964628	0.367327	0.419567
TwdlB	4	0.0853209	0.0901095	0.0106413	0	0.161114	0.129002	0.0914961	0.463753	0.808532	1	0.645055	0.711306
Tsp97E	2	0.658505	1	0.790643	0.514952	0.500226	0.31085	0.437608	0.403526	0.249453	0	0.208305	0.318548
CG6330	5	0.046392	0	0.279792	0.638998	0.473239	0.463373	0.180942	0.580082	0.716664	0.730501	0.990448	1
Ets97D	2	1	0.0147766	0.458486	0.788069	0.736431	0.789815	0.500835	0.116098	0.0750616	0	0.0763655	0.0828589
BM-40-SPARC	4	0	0.0468356	0.113517	0.316835	0.395938	0.585333	0.626314	0.843789	0.916154	1	0.922686	0.874311
CG5815	2	0.877607	1	0.968641	0.998855	0.973987	0.907563	0.888899	0.34306	0.329358	0	0.513926	0.516481
CG18766	2	0	0.515995	0.963652	1	0.975399	0.997768	0.812774	0.630213	0.508324	0.39856	0.28536	0.355601
CG31064	5	1	0.571944	0.304221	0.151807	0	0.347756	0.519076	0.604928	0.488807	0.623534	0.374862	0.407755
CG6066	2	0.829619	1	0.820525	0.719201	0.618216	0.43762	0.433357	0.259738	0.268969	0	0.498391	0.404521
spz	1	1	0.397187	0.0879015	0	0.101267	0.316672	0.604059	0.606671	0.657908	0.518821	0.470004	0.550184
mrt	5	0.585748	0.12859	0	0.576338	0.439445	0.910041	0.90673	1	0.923266	0.952342	0.774129	0.788065
RpS10a	2	0.982605	1	0.95954	0.716177	0.503732	0.605555	0.431728	0	0	0	0	0
Mlc1	4	0.0751163	0.028896	0	0.121334	0.260607	0.498697	0.649445	0.817418	0.935235	0.98888	0.995132	1
Klp98A	2	0.904869	0.103399	0.127746	0.697178	0.834662	1	0.844346	0.574986	0.413611	0.29308	0	0.133066
Sce	6	0.778925	1	0.810049	0.840481	0.791312	0.84663	0.493218	0.546054	0.28372	0.129291	0.16777	0
CG5003	6	0.919477	1	0.592653	0.607307	0.551776	0.377141	0.351346	0.305371	0.191543	0	0.432052	0.304438
Moca-cyp	6	0.673868	1	0.756868	0.641774	0.623829	0.526433	0.486653	0.44273	0.253277	0	0.525178	0.332816
Gfat2	3	0.297814	0	0.15742	0.533318	0.630251	1	0.587906	0.690182	0.455904	0.444867	0.14127	0.158745
htt	6	0.52976	0.460995	0.974978	1	0.677542	0.37856	0.661259	0.60273	0.423577	0.260294	0	0.0128348
CG10011	2	0.308382	0.505277	1	0.87556	0.754122	0.438079	0.799	0.74815	0.498214	0.2581	0	0.107587
fkh	3	0	0.710095	0.876873	1	0.955248	0.842374	0.811068	0.74569	0.665953	0.721918	0.537385	0.493375
CG1951	6	1	0.601778	0.562459	0.40944	0.398337	0.209203	0.331144	0.198539	0.206342	0	0.195063	0.149824
Vha100-1	2	0.738698	1	0.57267	0.493002	0.532614	0.474826	0.635117	0.560355	0.359148	0	0.321004	0.346726
CG14516	1	1	0.505536	0.134481	0.0367806	0.0960572	0	0.0707177	0.188399	0.126352	0.223392	0.392134	0.430332
SP1029	1	0.576196	0.71259	0.732522	0.0236856	0	0.867715	1	0.747041	0.468786	0.698393	0.0876641	0.0457688
Slbp	6	0.814637	0.862943	1	0.816932	0.59767	0.419086	0.229246	0.101956	0.0467031	0.0237597	0	0.00022253
CG11882	6	1	0.660896	0.821285	0.915781	0.902223	0.926764	0.758836	0.442099	0.30983	0.30584	0	0.0765736
CG14512	6	0.936201	1	0.510374	0.196602	0.358826	0.64724	0.694417	0	0.395137	0.0602856	0.207589	0.451843
dgt6	6	0.961075	1	0.749792	0.725426	0.69656	0.441769	0.351775	0.373335	0.26802	0	0.550448	0.451552
Ptp99A	3	0.56393	0	0.547124	0.784206	0.677018	0.512377	0.953929	1	0.723233	0.537979	0.374634	0.412981
CG2006	2	0.924318	0.640928	0.847672	1	0.956083	0.934688	0.561651	0.557784	0.391349	0.158351	0.0256579	0
Cog7	6	1	0.488073	0.973852	0.960647	0.783302	0.76059	0.599845	0.419039	0.206171	0.0728139	0.0294345	0
dgt1	6	1	0.901927	0.771143	0.804879	0.670337	0.589795	0.391566	0.384846	0.234497	0	0.398359	0.281624
ncd	2	0.887363	0.955996	1	0.974631	0.841539	0.518691	0.350474	0.371266	0.226601	0	0.254085	0.23407
CG7837	2	1	0.318302	0.649938	0.758151	0.662771	0.337425	0.31751	0.107494	0.0822539	0.0892114	0	0.0203291
CG7896	4	0	0.00946415	0.00944287	0.2302	0.339003	0.71235	0.788127	0.805604	1	0.812019	0.44106	0.489231
CG11504	6	1	0.841388	0.652434	0.901328	0.881156	0.877362	0.494414	0.558426	0.271803	0	0.289437	0.0583842
Sry-alpha	1	0.492571	1	0.414758	0.304908	0.310672	0.234	0.116305	0.066809	0	0.0535996	0.0190452	0.0966102
Sry-delta	6	0.817993	0.930537	0.873806	0.983048	0.940179	1	0.534236	0.370186	0.17664	0.0943487	0.102408	0
CG9743	4	0	0.103677	0.207256	0.557228	0.6574	0.920393	0.94601	1	0.966141	0.953096	0.905637	0.914165
CG9747	4	0.0430712	0	0.0351423	0.121363	0.225842	0.379675	0.506052	0.892716	1	0.815874	0.583743	0.600139
CG31030	5	0	0.115838	0.273833	0.496242	0.584868	0.823997	0.770483	0.859721	0.940783	1	0.915388	0.929281
spn-A	2	1	0.654678	0.773161	0.695415	0.588301	0.487488	0.303181	0.203229	0.116101	0.106059	0	0.0461509
CG7903	6	0.997261	0.731341	0.996017	1	0.752791	0.661011	0.640839	0.380979	0.273848	0.18137	0	0.0465594
PH4alphaEFB	5	0	0.441905	0.676952	0.796511	0.839972	0.999464	1	0.865382	0.721488	0.566559	0.404757	0.418525
spdo	2	0.0912267	0.493955	0.771368	1	0.936958	0.778307	0.671225	0	0	0	0	0
PH4alphaSG2	5	0	0.0707353	0.13105	0.469102	0.828868	1	0.973528	0.826081	0.640073	0.391674	0.272172	0.429041
CG2224	2	0.832017	1	0.731273	0.139621	0.205971	0.0646708	0	0.21607	0.209555	0.169281	0.558083	0.466735
bnk	1	0.610959	1	0.303996	0.1095	0.151708	0	0	0	0	0	0	0
CG1544	5	0	0.247819	0.579199	0.796198	0.723768	0.816488	0.784851	0.833822	0.777315	0.814664	0.974123	1
CG1542	6	0.779988	1	0.96409	0.932207	0.921827	0.876084	0.62703	0.4216	0.164388	0	0.474203	0.409545
CG31002	3	0	0.275021	0.562832	0.906687	1	0.921319	0.910328	0.635776	0.567278	0.307493	0.102011	0.158988
pasha	6	0.857238	1	0.681883	0.540976	0.539632	0.463826	0.484294	0.328241	0.286877	0	0.342037	0.369154
CG1815	6	0.867184	1	0.573285	0.546256	0.597032	0.139344	0.462377	0.435359	0.309167	0	0.596429	0.49183
ttk	2	0.419823	0.0415918	0.430266	0.892116	1	0.903313	0.927901	0.577148	0.369787	0.157549	0	0.0527606
ttk	3	0.419823	0.0415918	0.430266	0.892116	1	0.903313	0.927901	0.577148	0.369787	0.157549	0	0.0527606
CG11563	6	0.780008	1	0.989427	0.955333	0.938561	0.87336	0.78632	0.309452	0.243971	0	0.64864	0.608697
CG1910	6	0.55092	0.580941	0.898386	1	0.77622	0.598622	0.615676	0.306139	0.218413	0.0338402	0	0.0455613
Smvt	3	0	0.367215	0.76143	0.778152	0.631205	0.301678	0.190218	0.123833	0.20707	0.664977	0.93088	1
CG2003	4	0.427131	0.15454	0	0.119388	0.223726	0.725761	0.87925	1	0.946548	0.713283	0.848135	0.861259
Map205	6	1	0.927009	0.468461	0.411298	0.524161	0.577284	0.780127	0.330227	0.240457	0	0.413007	0.422519
tsh	5	0	0.74559	1	0.998182	0.978168	0.857287	0.938955	0.7457	0.726943	0.729849	0.690457	0.731276
CycK	6	0.95932	1	0.695755	0.838698	0.806172	0.711064	0.573432	0.234935	0.14741	0.0270141	0	6.82834e-06
CG17018	1	1	0.803312	0.444904	0.139892	0.227044	0.0246897	0.235691	0.110107	0.0870285	0	0.054939	0.141338
Ptr	3	0	1	0.892757	0.871633	0.656883	0.356537	0.595974	0.930166	0.978142	0.617142	0.27025	0.333001
CG17508	2	1	0.878945	0.189833	0	0.418414	0.607116	0.778424	0.289098	0.586083	0.367656	0.341527	0.669042
d4	6	0.739922	1	0.716934	0.524537	0.583398	0.371561	0.541101	0.223287	0.23209	0	0.424324	0.445711
CG10417	6	0.552476	0.890379	1	0.695761	0.723179	0.550169	0.719665	0.0508904	0.261026	0	0.37503	0.440643
CG10465	2	0.759642	1	0.889135	0.618989	0.785082	0.516194	0.920894	0.0231794	0.35123	0	0.331633	0.659745
sced	1	1	0.903329	0.523405	0.491601	0.542266	0.123939	0.354653	0.311181	0.303722	0	0.542617	0.559131
Adf1	2	0.641177	0.741238	0.888439	1	0.78921	0.741752	0.728351	0.575323	0.391292	0.271228	0	0.0540102
CG17002	6	0.93303	1	0.673158	0.720889	0.592331	0.516222	0.27416	0.286581	0.0897627	0.144208	0.0808092	0
Tsp42Ea	4	0.0380254	0	0.0414496	0.271481	0.521682	0.772611	0.82494	0.407391	1	0.843536	0.755573	0.961529
Tsp42Ed	4	0	0.0350412	0.101779	0.267293	0.437747	0.569175	0.59253	0.794673	0.929162	0.989879	0.977493	1
Cyp6u1	2	1	0.0913487	0.195351	0.320369	0.10983	0.0521602	0	0.264097	0.0208853	0.129368	0.378253	0.282508
CG11110	3	1	0.30645	0	0.196268	0.319041	0.536465	0.3539	0.43773	0.364097	0.403193	0.381717	0.321485
CG30152	3	0.793088	0.369157	0.0373175	0	0.099565	0.300244	0.631298	1	0.984034	0.726519	0.462976	0.601314
CG11180	6	0.860216	1	0.891201	0.831682	0.820383	0.319974	0.691339	0	0.238276	0.12543	0.883793	0.915989
CG13427	6	0.53716	0.999595	1	0.836951	0.762673	0.540696	0.338339	0.197437	0.0243236	0.138412	0	0.258187
CG8929	6	0.379606	1	0.7747	0.747167	0.61052	0.397471	0.365198	0.3708	0.170906	0.0456237	0.028386	0
CG16868	2	1	0.920546	0.776987	0.759431	0.674347	0.197278	0.413156	0.577445	0.37105	0	0.628989	0.434853
CG10444	1	1	0.711484	0.137362	0	0.222016	0.426415	0.395028	0.304407	0.558074	0.620911	0.513382	0.65192
Toll-7	5	0	0.395747	0.801369	0.904717	0.989436	0.963614	1	0.919669	0.851207	0.795422	0.673834	0.699609
CG8654	6	0	0.775241	1	0.635723	0.489813	0.258993	0.290874	0.414768	0.255396	0.168412	0.14917	0.247056
sm	5	0	0.162627	0.448916	0.572006	0.56042	0.707109	1	0.886848	0.743722	0.694757	0.442134	0.562781
cora	5	0	0.17187	0.258107	0.67412	0.777941	0.880173	0.984244	0.955861	0.911253	1	0.932786	0.937487
wbl	5	0	0.158774	0.288496	0.724446	0.877576	1	0.876486	0.508819	0.40264	0.481976	0.381923	0.435719
rib	6	0	0.583111	0.822344	1	0.941175	0.851205	0.7972	0.55889	0.421622	0.314602	0.185207	0.212909
CG7744	2	1	0.560792	0.820058	0.64609	0.504643	0.387894	0.399599	0.269134	0.141891	0	0.00421268	0.00901425
CG9416	5	0	0.0724946	0.166729	0.546616	0.735073	0.947227	1	0.752039	0.681938	0.581864	0.576572	0.616457
mip40	6	0.757863	0.977019	0.978671	1	0.965629	0.915092	0.562929	0.254466	0.177614	0	0.371954	0.263833
ena	6	0.370617	0.915762	1	0.639051	0.621199	0.355678	0.56832	0.424368	0.416882	0.458124	0	0.0292376
CG15107	6	1	0.757491	0.905726	0.855537	0.847571	0.474293	0.483378	0.0988321	0.210741	0	0.139931	0.261171
prod	6	0.786635	0.99476	0.963002	1	0.881777	0.736793	0.504988	0.502351	0.308814	0	0.376994	0.150251
CG15080	4	0.0015945	0.00595103	0	0.117812	0.170738	0.290082	0.696198	1	0.837541	0.659144	0.405335	0.408588
CG15098	2	0.862497	0.990394	1	0.232717	0.205441	0.0239766	0.0561394	0	0.249715	0.128484	0.532717	0.585591
SP2637	3	1	0.753337	0	0.287282	0.594358	0.946357	0.721444	0.745215	0.564961	0.439293	0.393202	0.307806
Idgf5	4	0.00430034	0.00974756	0	0.0213692	0.0297202	0.0673054	0.102593	0.495796	0.768524	0.902963	0.972683	1
GstE7	3	0.234587	0.399093	0.187821	0	0.194673	0.28339	0.20589	0.0674943	0.259947	0.440188	0.849453	1
slim	5	0.396008	0.00351899	0.833965	1	0.725028	0.997031	0.89582	0.571146	0.600915	0.657257	0	0.1823
CG10924	5	0	0.287334	0.522085	0.841235	0.929096	1	0.894419	0.533318	0.392811	0.403386	0.350624	0.531227
Pepck	3	0	0.472364	0.69082	0.819014	0.791474	0.617448	0.591379	0.728314	0.85861	1	0.863071	0.905205
CG5098	6	1	0.701035	0.616211	0.513355	0.499339	0.034818	0.31631	0.202519	0.12915	0	0.078664	0.120774
Dip3	3	0.146514	0.42246	0.189133	0.579822	0.679073	0.967682	1	0.62922	0.339722	0	0.0766431	0.0245142
CG10915	6	1	0.533813	0.637052	0.755292	0.669726	0.607345	0.440276	0.452348	0.253508	0.253648	0.057832	0
Hsf	6	1	0.662784	0.547853	0.524659	0.542768	0.568968	0.591872	0.425514	0.249399	0.0576707	0	0.0570472
CG14480	6	0.561279	0.805251	1	0.921475	0.82274	0.728763	0.777331	0	0.191033	0.163834	0.233206	0.399541
CG30105	2	0.773223	0.897804	1	0.809787	0.720259	0.541335	0.464197	0.141576	0.265443	0	0.338351	0.376391
RhoGAP54D	2	1	0.85662	0.941431	0.856825	0.726516	0.343	0.339499	0.257109	0.15929	0	0.336899	0.302
Sip1	5	0.377536	0.545684	0.228355	0	0.458444	0.610719	0.812026	0.822408	0.854044	1	0.887038	0.935979
l(2)k01209	6	0.761997	0.828994	1	0.893535	0.918542	0.746754	0.891628	0.53238	0.431957	0	0.447862	0.50264
Lhr	2	0.738537	0.804489	1	0.924758	0.805143	0.654038	0.487208	0.159723	0.150218	0	0.0645595	0.0985173
CG4847	4	0.00538327	0.0118571	0	0.0456061	0.0814974	0.194397	0.326549	0.504277	0.773206	0.813825	1	0.86179
CG4853	1	0.705394	0	0.491491	0.691665	0.846177	0.813507	1	0.757609	0.656875	0.521127	0.381503	0.550184
CG4866	6	0.515659	0.841048	0.876385	0.857476	0.960209	1	0.729608	0.206045	0.215755	0	0.453679	0.47729
MESR4	6	1	0.891191	0.81309	0.624065	0.490385	0	0.395376	0.226619	0.203061	0.122867	0.492876	0.504805
CG6805	2	0.32786	0.734681	0.0681642	0.40956	0.654822	1	0.772334	0	0.207093	0.105516	0.37096	0.568727
fat-spondin	4	0	0.0466517	0.0982414	0.414001	0.573242	0.804427	0.854959	0.979856	0.991922	1	0.849863	0.828165
CG8950	6	1	0.697572	0.829054	0.72312	0.610663	0.500039	0.333364	0.29734	0.141648	0	0.259725	0.135121
NiPp1	6	1	0.494915	0.946764	0.941819	0.892664	0.900941	0.650389	0.335225	0.202088	0.132352	0	0.0499703
CG5065	4	0	0.0361985	0.0216821	0.355894	0.526365	0.816197	0.981182	1	0.836205	0.648233	0.565409	0.590134
Picot	4	0.482767	0.274678	0.0692375	0	0.090773	0.0357976	0.0646547	0.29764	0.633548	0.806438	0.997438	1
CG30100	1	0	0	0	0	0	0	0	0	0	0	0	0
CG4282	2	1	0.878784	0.787119	0.810757	0.781714	0.548103	0.592829	0.410494	0.290221	0	0.472116	0.407622
CG4398	5	0.784851	0.636617	0.190397	0	0.0758404	0.379592	0.719842	0.518076	0.545745	0.622289	0.77358	1
Asph	3	0	0.705822	0.91887	0.773937	0.701127	0.738199	0.899614	0.917334	1	0.944896	0.812286	0.866377
shark	2	1	0.315553	0.475699	0.60269	0.591609	0.631415	0.394454	0.266257	0.150172	0.153664	0.0278324	0
CG8441	6	0.711777	1	0.865095	0.7571	0.77106	0.564931	0.583645	0	0.134161	0.00154848	0.09832	0.17533
CG8435	6	0.851147	1	0.758664	0.59691	0.588802	0.509383	0.443431	0.311398	0.221686	0	0.151967	0.165742
tun	3	0.989327	1	0.176653	0	0.188607	0.0816822	0.218462	0.30235	0.442054	0.452828	0.596897	0.633757
GalNAc-T1	5	0.648071	0.395203	0.0339216	0.239026	0.343686	0.84619	0.952336	0.719876	0.893113	1	0	0.0856473
CG8207	6	0.478664	0.836176	1	0.733544	0.723219	0.772542	0.63906	0.338415	0.192807	0.0657267	0.0094506	0
fus	3	0.52993	0	0.366032	0.826265	0.801067	0.733053	1	0.906379	0.559787	0.478868	0.144905	0.219519
Khc-73	3	0.688702	0.833991	1	0.434041	0.170614	0	0.479224	0.569106	0.715839	0.922189	0.627358	0.668985
CG8180	1	1	0.320388	0.031057	0	0.0379017	0.140702	0.204192	0.255059	0.305418	0.4148	0.392709	0.32004
CG11808	1	0.778918	1	0.86149	0.745813	0.676403	0.640848	0.531966	0.293197	0.240421	0	0.227779	0.225667
Pms2	2	1	0.666036	0.621564	0.527262	0.518225	0.24642	0.309149	0.183893	0.150756	0	0.148972	0.257952
Lap1	6	1	0.844386	0.656039	0.59684	0.672887	0.313923	0.508196	0.354875	0.285514	0	0.598488	0.586092
chn	3	0.911071	0.422929	1	0.927522	0.199614	0	0.25314	0.909244	0.808268	0.719264	0.207819	0.11592
CG10253	4	0	0.0871358	0.175047	0.404406	0.563838	0.97525	0.955905	1	0.847752	0.63626	0.431883	0.493773
CG10139	6	0.793607	1	0.760668	0.74847	0.707826	0.543963	0.406593	0.240538	0.228683	0	0.456005	0.341234
BEAF-32	2	0.914524	1	0.970998	0.964876	0.874352	0.769444	0.558059	0.431261	0.263322	0	0.416443	0.289191
BEAF-32	6	0.914524	1	0.970998	0.964876	0.874352	0.769444	0.558059	0.431261	0.263322	0	0.416443	0.289191
Cyp6a19	1	1	0.200086	0.147958	0.0891995	0.12509	0.00108704	0.0507214	0.0823602	0	0.0110164	0.00581724	0.0358678
Cyp6a8	3	0	0.0806426	0.166385	0.379468	0.686481	0.657886	0.657131	0.17192	0.171653	0.461216	0.848454	1
CG10151	5	0.318259	0.169369	0	0.441421	0.589537	1	0.939254	0.746302	0.568983	0.424586	0.136594	0.107807
Sin1	1	1	0.253616	0.0902047	0.149199	0.105495	0.170334	0.121977	0.0190333	0	0.00384688	0.0155185	0.0746911
Asx	2	1	0.523781	0.723633	0.869555	0.733451	0.332579	0.710792	0.468329	0.351725	0.313149	0.00235647	0
CG17385	2	0.75945	1	0.730802	0.771145	0.816783	0.840401	0.394918	0.243164	0.0247538	0.0590896	0.139774	0
CG8468	5	0	0.308112	0.656411	0.784914	0.792131	0.91355	0.945864	1	0.960239	0.945868	0.992587	0.973099
CG13018	5	0.523352	0.119305	0.546797	0.900884	0.777609	1	0.730947	0	0.475514	0.622302	0.619998	0.601434
shot	5	0	0.0612079	0.329171	0.375755	0.354543	0.120766	0.471258	0.572845	0.735818	1	0.957969	0.936377
shot	5	0	0.0612079	0.329171	0.375755	0.354543	0.120766	0.471258	0.572845	0.735818	1	0.957969	0.936377
mars	2	1	0.928044	0.898219	0.940931	0.791681	0.515489	0.394963	0.389551	0.258323	0	0.448928	0.362927
arr	6	0.443582	0.769949	1	0.804168	0.750993	0.635711	0.601697	0.340947	0.223793	0	0.17133	0.129168
CG4627	5	0.841429	0	0.263957	0.541124	0.502714	0.772947	0.826179	0.923649	1	0.900537	0.815957	0.70907
Dp	6	0.84535	0.881323	0.986059	1	0.891856	0.594358	0.576023	0.414534	0.251732	0	0.275977	0.308777
Mp20	4	0.0989348	0.0338477	0	0.0533032	0.201057	0.314562	0.398605	0.601515	0.794054	0.943575	0.98305	1
CG13321	4	0.0432604	0.0638344	0	0.109267	0.178291	0.446635	0.537714	0.796989	0.875587	0.969447	1	0.939317
Psc	6	0.713071	0.855092	0.878823	1	0.647318	0.514827	0.694677	0.537647	0.237827	0	0.310465	0.239501
Mdr49	2	0.147397	1	0.625102	0.224637	0.104678	0	0.00276429	0.10189	0.182134	0.281847	0.70762	0.739346
fra	3	0	0.550889	0.900174	1	0.947339	0.834729	0.959073	0.708123	0.486033	0.311515	0.167371	0.226113
Cyp301a1	4	0.0193313	0	0.0203964	0.116215	0.18822	0.504321	0.878548	1	0.748925	0.665326	0.390818	0.461786
spt4	6	0.894808	0.778141	1	0.95151	0.848889	0.746738	0.824567	0.840897	0.623664	0.0547235	0	0.0448918
sca	2	0	0.807848	1	0.854503	0.556722	0.238901	0.0556517	0.0155119	0.042205	0.154736	0.108666	0.110255
nemy	4	0.88225	0.0792558	0	0.0528733	0.128875	0.493398	0.5514	0.648829	0.762648	0.788876	0.982321	1
muskelin	1	1	0.733582	0.464706	0.349389	0.479972	0.245702	0.420647	0.366944	0.3141	0	0.492472	0.482967
CG13159	4	0.0474224	0.0422725	0	0.401173	0.511656	0.846388	0.896063	0.968755	1	0.678447	0.150463	0.126549
CG8525	6	0.603728	0.863819	0.638166	0.709321	0.814606	1	0.592537	0.171005	0	0.076296	0.695748	0.601416
Dyb	3	0.245683	0	0.771442	0.460089	0.274472	0.443285	0.514555	1	0.823504	0.871173	0.516293	0.574512
CG8545	6	0.681755	1	0.976575	0.97882	0.972327	0.652923	0.765919	0.411657	0.309843	0	0.678123	0.643014
CG8321	4	0.896229	0	0.185635	0.71593	0.873744	1	0.872642	0.687488	0.753801	0.879607	0.697368	0.785032
Cam	3	0.695124	1	0.810731	0	0.237114	0.0584969	0.374057	0.349942	0.619223	0.641188	0.832383	0.919628
Sr-CII	2	0.295206	0.894519	1	0.60553	0.389406	0.163927	0.177102	0.0848284	0.0256908	0.0276552	0	0.0986709
CG8878	6	0.967713	1	0.885591	0.967232	0.885565	0.609458	0.638181	0.306657	0.197533	0	0.192201	0.111843
otk	5	0	0.43093	0.591237	0.80057	0.902414	0.961159	1	0.823403	0.639199	0.545987	0.422422	0.468432
RnrS	2	0.911114	0.712303	1	0.828981	0.69644	0.635505	0.451218	0.408705	0.320737	0.117642	0	0.119403
TwdlBeta	4	0.0531536	0.0230136	0	0.0103091	0.133571	0.0578564	0.0907956	0.59079	1	0.959905	0.241235	0.271183
shn	3	0.49638	0.977066	0.826514	0.827171	0.633967	0	0.457007	0.494809	0.656217	0.842491	1	0.954474
Syx6	1	1	0.485856	0.283882	0.105602	0	0.0641397	0.14494	0.512757	0.45129	0.308568	0.0447236	0.104069
CG7737	3	0.8371	1	0.204805	0	0.211704	0.235296	0.578018	0.80821	0.67511	0.535358	0.692165	0.690687
CG7759	5	0	0.0262229	0.106354	0.402571	0.632142	0.999691	1	0.792255	0.712386	0.552006	0.385741	0.390852
CG7763	2	0.0566706	0.248865	0.421223	0.756097	0.960311	1	0.934037	0.560779	0.46738	0.23149	0	0
CG7777	1	1	0.477406	0.0751358	0	0.113859	0.299187	0.30023	0.3423	0.493817	0.554871	0.535949	0.541125
ix	6	0.916583	1	0.819017	0.764612	0.777268	0.73555	0.6237	0.472655	0.213539	0	0.522104	0.405942
stan	5	0	0.11798	0.231959	0.761033	0.955054	0.846012	1	0.836028	0.712663	0.629669	0.400014	0.464796
CG30020	6	0.878444	1	0.820306	0.776655	0.705429	0.376254	0.498989	0.394052	0.287308	0	0.465473	0.380549
CG30015	3	0	0.808923	0.855547	0.925591	1	0.889985	0.821343	0.689294	0.525052	0.661397	0.648102	0.657922
CG7686	6	0.00722895	0.715855	1	0.858355	0.991659	0.804539	0.253993	0.0153649	0	0.233971	0.914494	0.970719
CG12343	6	0.552966	0.964445	1	0.882821	0.891291	0.953891	0.793243	0	0.266185	0.220999	0.518337	0.55128
CG11777	6	0.725387	0.876403	1	0.804268	0.754604	0.528463	0.565728	0.28835	0.187271	0	0.132043	0.194074
CG17765	3	0.384955	0.678737	0.387743	0	0.46657	1	0.962168	0.383112	0.227527	0.219959	0.165691	0.243019
psq	6	0.824573	1	0.726719	0.751536	0.650128	0.278892	0.287226	0.443552	0.16158	0	0.271058	0.149656
CAP	4	0.10816	0.045141	0	0.261482	0.357832	0.43569	0.619978	0.792659	0.885795	1	0.947955	0.94684
Ndg	4	0	0.113824	0.304766	0.579253	0.603167	0.688785	0.777144	0.976116	1	0.972466	0.780394	0.746985
CG12128	6	1	0.851421	0.765853	0.824747	0.899696	0.770662	0.628418	0.450276	0.285814	0	0.660302	0.559978
CG1407	2	0.9844	0	0.33499	0.954554	1	0.992043	0.931251	0.580303	0.524111	0.288843	0.00544023	0.0914829
CG1418	2	0.843744	0.509313	0.705733	0.854007	0.916585	1	0.943916	0.489299	0.289795	0.153372	0	0.0495106
Mef2	5	0.240407	0	0.563483	0.663635	1	0.802336	0.654419	0.613205	0.487601	0.365154	0.39336	0.282505
CG1648	4	0.0125534	0.030927	0	0.289664	0.376662	0.753982	0.763019	0.839856	0.797233	0.927707	1	0.937204
Uba1	6	1	0.436137	0.711602	0.65636	0.603036	0.543682	0.400778	0.251013	0.113519	0	0.0454044	0.0480456
CG1902	3	0	0.492226	0.795851	0.933753	0.681373	0.517201	0.97969	0.997957	1	0.212099	0.567564	0.85868
CG1868	2	0.842857	1	0.794322	0.59128	0.635309	0.473723	0.544214	0.35825	0.24597	0	0.204089	0.370289
CG1888	6	0.511188	0.580192	1	0.888627	0.883245	0.860172	0.733827	0.592569	0.362141	0.249564	0	0.0598347
Dbp45A	6	0.153288	0.696744	0.952518	1	0.985548	0.748513	0.670116	0.160484	0.0476283	0	0.603656	0.629249
Vang	2	0.411701	0.479151	0.652387	0.951062	1	0.900468	0.857749	0.512748	0.366129	0.16507	0	0.0580038
CG8788	5	0.663386	0.382103	0.866644	0.503139	0.535789	0.526305	0.617809	0.273236	1	0.948972	0	0.526079
CG30344	3	0.395664	0.554688	0.496115	0.524605	0.654278	0.897017	1	0.936133	0.892374	0.47973	0	0.0549959
CG2063	6	0.592578	1	0.939503	0.977757	0.921548	0.765293	0.596421	0.4325	0.318689	0	0.445342	0.257528
CG8026	4	1	0.283332	0	0.131325	0.349746	0.489363	0.520251	0.543164	0.711316	0.710884	0.930074	0.960447
sns	5	0	0.196895	0.470023	0.813564	0.981668	1	0.926485	0.729593	0.67023	0.651516	0.540467	0.528952
MrgBP	6	0.851533	1	0.872788	0.943765	0.81446	0.830463	0.516878	0.256169	0.0990376	0.0496137	0.0582581	0
gcl	2	1	0.530875	0.144942	0.314511	0.356421	0.356198	0.370632	0.434788	0.711137	0.604312	0	0.114148
CG14767	1	0.380952	0	0.874071	1	0.860317	0.786088	0.870349	0.864938	0.842432	0.71332	0.314893	0.40547
Rs1	6	0.514384	0.91879	1	0.911594	0.829512	0.781993	0.586042	0.34294	0.222349	0	0.698225	0.55901
Mlh1	2	1	0.379693	0.853889	0.89614	0.72473	0.548036	0.273973	0.214481	0.155245	0.0734266	0	0.0275027
CG14756	5	0	0.0836568	0.0161775	0.468782	0.554799	0.975294	1	0.959629	0.735679	0.374015	0.128908	0.0985772
kermit	3	0.500786	0.41728	0.926406	0.85055	0.843661	1	0.87578	0.822086	0.13027	0	0.818571	0.665795
CG30377	1	1	0.493173	0.0328576	0	0.0684356	0.254217	0.300945	0.432623	0.649913	0.755644	0.176725	0.136707
CG12159	1	1	0.346163	0.53211	0.546326	0.525879	0.409989	0.302794	0.106553	0.0777532	0.0491174	0	0.0176461
scra	2	0.855202	0.93468	0.997376	1	0.820004	0.51939	0.400796	0.393796	0.260709	0	0.381405	0.265558
CG2064	5	0	0.0106476	0.0715319	0.538402	0.722749	0.89069	0.795252	0.514303	0.57938	0.687037	0.837727	1
CG1942	5	0	0.244528	0.774446	1	0.859454	0.601612	0.539488	0.207256	0.284291	0.434502	0.610667	0.692503
CG30497	1	1	0.933087	0.186539	0.124219	0.262678	0	0.262049	0.562726	0.53838	0.29408	0.47616	0.379617
CG18812	4	0.698382	0.466204	0.0151819	0	0.210868	0.168631	0.469182	0.625323	0.816986	0.843242	0.930284	1
tor	1	1	0.867895	0.375544	0.260355	0.432528	0.233793	0.399252	0.38191	0.328146	0	0.461052	0.45992
CG17985	5	0.95134	1	0	0.0437604	0.386031	0.807695	0.929777	0.96504	0.752401	0.580763	0.618914	0.591986
Orc1	2	1	0.824819	0.700588	0.619269	0.603145	0.452207	0.320303	0.42943	0.329236	0	0.343407	0.320009
Incenp	2	0.897628	0.972125	0.968902	1	0.857286	0.597984	0.36513	0.28742	0.155566	0	0.289605	0.127461
CG11123	6	0.680199	0.968176	0.957128	0.994128	1	0.748082	0.654447	0.362351	0.205996	0	0.547803	0.485212
cos	6	0.788209	1	0.865073	0.635453	0.56957	0.297591	0.299853	0.298945	0.23592	0	0.324772	0.278563
Tsp42Ef	4	0.880045	0.0371763	0	0.0107919	0.122058	0.51079	0.61162	0.804808	0.915858	1	0.917102	0.931527
Spn43Aa	5	0	0.116137	0.145704	0.574346	0.780654	1	0.962078	0.866898	0.59649	0.426448	0.115873	0.172553
CaMKI	3	0.435487	0	0.421006	0.593416	0.743827	0.817372	1	0.412668	0.742511	0.485208	0.4427	0.689543
zfh2	5	0	0.333505	0.673327	0.746531	0.834863	0.693752	1	0.692058	0.727336	0.617084	0.55816	0.688739
bip2	6	0.36428	0.568657	0.73423	0.58545	0.655673	0.219284	1	0.140965	0.445317	0.108003	0	0.358644
Hcf	6	0.44198	0.779879	0.922959	1	0.965464	0.703938	0.952065	0.239153	0.355449	0	0.350967	0.442959
ci	6	0	0.714276	1	0.859463	0.815346	0.669256	0.780102	0.355632	0.466417	0.367394	0.254021	0.405318
CG11076	3	0.760139	0	0.57363	0.847285	0.887063	1	0.957833	0.233131	0.354424	0.169827	0.534982	0.516936
lola	2	0.683781	1	0.844061	0.714388	0.668484	0.503031	0.515203	0.448202	0.233805	0	0.305015	0.165063
lola	2	0.683781	1	0.844061	0.714388	0.668484	0.503031	0.515203	0.448202	0.233805	0	0.305015	0.165063
lola	2	0.683781	1	0.844061	0.714388	0.668484	0.503031	0.515203	0.448202	0.233805	0	0.305015	0.165063
pr	6	0.642311	1	0.923323	0.628828	0.63933	0.479528	0.628008	0	0.116586	0.23148	0.286063	0.45456
Aprt	6	0.376674	0.772942	1	0.5326	0.168935	0	0.217009	0.0435311	0.15402	0.0337601	0.636564	0.735951
ptc	6	0	0.875902	1	0.982228	0.947605	0.817186	0.760342	0.50348	0.23774	0.211552	0.082692	0.0627455
ewg	5	0.258934	0	0.0805765	0.540752	0.889375	1	0.956572	0.678131	0.535248	0.403279	0.164518	0.226616
Mvl	2	1	0	0.693559	0.861796	0.680567	0.596348	0.55367	0.395949	0.298731	0.0823209	0.278118	0.260646
CG5033	6	0.624964	0.966396	1	0.954557	0.875311	0.655125	0.649847	0.385532	0.210586	0	0.539275	0.502282
Nopp140	2	0.738537	1	0.967075	0.807542	0.736724	0.297733	0.533391	0.355237	0.20017	0	0.626895	0.484397
Nopp140	6	0.738537	1	0.967075	0.807542	0.736724	0.297733	0.533391	0.355237	0.20017	0	0.626895	0.484397
CG7730	2	1	0.734984	0.388408	0.245646	0.459373	0.384675	0.302082	0.273935	0.230099	0	0.176716	0.242989
TpnC73F	4	0.0630315	0.0115972	0	0.202261	0.29585	0.625706	0.806036	0.884563	0.990946	1	0.938235	0.947826
Fibp	5	1	0	0.201643	0.590743	0.778831	0.818412	0.886262	0.751468	0.794864	0.641015	0.618821	0.691823
JhI-21	2	0.933031	1	0.697838	0.388175	0.457087	0.331213	0.264166	0.219967	0.194326	0	0.405449	0.451303
CRMP	4	0	0.106719	0.0903435	0.477314	0.663762	0.954318	0.965563	1	0.944649	0.887855	0.742849	0.728172
MESK2	4	0.808841	0.168181	0	0.460154	0.499829	0.68323	0.701205	0.938465	0.983371	1	0.794247	0.780932
CG18004	6	0.907684	1	0.829463	0.734859	0.604521	0.457673	0.329435	0.367787	0.200061	0.0107813	0.0802056	0
didum	2	1	0.134027	0.134306	0.0535704	0.0482934	0	0.204976	0.152253	0.226016	0.213967	0.201754	0.282764
Mlc2	4	0.0539349	0.00803189	0	0.130523	0.265374	0.518103	0.652549	0.852961	0.959297	1	0.998601	0.983111
Cyp6d5	5	0	0.267336	0.428306	0.646228	0.771364	0.919658	0.965015	0.723578	0.551038	0.634602	0.921196	1
Nmda1	5	0.289454	0.099543	0.447029	0.407793	0.634422	1	0.88671	0.430092	0.520981	0.100884	0	0.568854
Pten	6	0.89945	0.586395	0.884308	0.729044	0.811888	0.443561	1	0.018372	0.311638	0	0.0690086	0.441304
ltd	1	1	0.693941	0.069454	0	0.28716	0.394979	0.524168	0.535287	0.709535	0.604564	0.599627	0.713545
scf	3	0	0.212778	0.542765	0.875829	0.921216	0.960404	1	0.959848	0.795307	0.563375	0.266267	0.282541
vari	5	0.141549	0.275402	0	0.400833	0.630408	1	0.901005	0.846914	0.816802	0.777139	0.636476	0.640337
CG9527	4	0	0.127958	0.363644	0.444165	0.288374	0.193259	0.269528	0.67994	0.89151	1	0.986695	0.936387
Cenp-C	6	1	0.675114	0.797257	0.812037	0.688884	0.324041	0.423794	0.093975	0.0632409	0	0.0997305	0.130136
sdt	3	0	1	0.927848	0.914566	0.780058	0.736982	0.692477	0.9474	0.635873	0.610768	0.350425	0.266185
E23	1	1	0.406995	0	0.210128	0.455775	0.68628	0.770617	0.381004	0.134727	0.130478	0.287836	0.265048
MRP	4	0.593697	0.426018	0.213419	0.129826	0.138529	0	0.538028	0.589639	0.685849	1	0.969452	0.985006
PNUTS	3	0.796102	0	0.518519	1	0.585476	0.439996	0.600257	0.408565	0.587325	0.654064	0.883276	0.899101
CG33649	2	0	0	0	0	0	0	0	0	0	0	0	0
CG33672	3	0.124963	0.125347	0.214143	0.323544	0.164282	0.0907827	0.139294	1	0.300063	0.086033	0.0199056	0
His1:CG33801	2	0	0	0	0	0	0	0	0	0	0	0	0
Cp7Fa	4	0.618105	0	0	0.309134	0	0	0.245214	0.325198	0.306939	0.601908	0.807077	1
CG18003	5	0	0.0728834	0.425911	0.76525	0.865968	0.478993	0.1101	0.512436	0.752253	0.772456	0.764194	1
Chrac-14	2	0.810085	1	0.884207	0.620447	0.56001	0.365421	0.384919	0.330205	0.2407	0	0.357866	0.345369
CG10737	5	0.436369	0.0145949	0	0.338521	0.468973	0.732374	0.817539	0.851042	0.889776	1	0.974554	0.970864
CG9850	4	0.00448188	0	0.000665322	0.035378	0.0941014	0.175569	0.340785	0.743773	0.992043	1	0.628161	0.63773
Dyrk3	6	0.179177	0.390885	0.825289	0.706634	0.800359	0.605232	1	0.0338426	0.372151	0	0.0936181	0.415148
seq	2	0	0.406505	0.694129	1	0.817641	0.515694	0.559405	0.585576	0.375366	0.3231	0.174723	0.0297282
CG9795	2	1	0.776761	0.246241	0.426371	0.677831	0.53581	0.688363	0.382464	0.351333	0	0.658187	0.608264
armi	2	1	0.371185	0.0858425	0	0.0442979	0.0266931	0.137569	0.104515	0.0908865	0.053054	0.00818042	0.0786213
mt:ATPase8	1	0	0	0	0	0	0	0	0	0	0	0	0
mt:ND3	1	0	0	0	0	0	0	0	0	0	0	0	0
CG4467	4	0	0.0772999	0.0588643	0.192013	0.287139	0.746565	1	0.937545	0.900287	0.709578	0.602603	0.725557
l(3)neo38	3	0	0.631652	0.914911	1	0.975784	0.899976	0.857792	0.780635	0.559319	0.447133	0.268988	0.253454
Mt2	1	0.315223	0.57941	0.938754	1	0.938796	0.758175	0.639324	0.268523	0.156294	0	0.306209	0.337705
CG34137	1	0.630599	1	0.333697	0.209586	0	0	0	0	0	0	0	0
Mctp	4	1	0.413177	0.115307	0	0.16363	0.331077	0.513307	0.590516	0.657728	0.542988	0.54441	0.645786
Mhcl	3	0.16187	0	0.527149	0.815674	0.747478	0.917001	1	0.930801	0.611795	0.749206	0.265458	0.361836
ps	5	0	0.274701	0.590171	0.688849	0.694425	0.620282	0.802789	0.769219	0.966012	1	0.770892	0.810412
Stlk	1	0.994784	1	0.616943	0.36942	0.810488	0.791814	0.969487	0	0.533131	0.00682604	0.366506	0.793301
cta	2	1	0.969687	0.534193	0.497808	0.801966	0.623136	0.782909	0.350704	0.400103	0	0.48844	0.488472
Cht3	4	0	0.0355472	0.103281	0.217808	0.354789	0.755472	1	0.803558	0.558982	0.312684	0.506912	0.582454
CG34159	6	0.62589	1	0.972212	0.626749	0.576536	0.650959	0.451793	0.346409	0.250696	0	0.033893	0.00718899
CG34191	3	0.331799	0.0447038	0	0.430254	0.691527	0.887628	1	0.821412	0.790481	0.53443	0.588567	0.610779
CG34214	2	0.567429	1	0.492024	0.196438	0.151509	0.0444688	0.0361672	0.0326529	0	0.0258399	0.00500626	0.213286
CG34242	4	0	0.293589	0.65022	0.151002	0.593038	0.726404	1	0.168926	0.642677	0.350201	0.356671	0.877711
CG34310	5	0.116171	0.423229	0	0.357468	0.572663	1	0.903582	0.250093	0.620772	0.157028	0.318036	0.0663403
CG34348	6	1	0.489887	0.338077	0.348203	0.309424	0.44578	0.521905	0.187369	0	0.112877	0.168683	0.24855
Fili	5	0	0.108919	0.267923	0.679946	0.838088	0.917777	1	0.904801	0.912528	0.802672	0.486665	0.540707
CG34380	4	0	0.435168	0.811701	0.975764	0.948032	0.846625	0.998277	1	0.86948	0.782319	0.60149	0.585269
CG34394	1	1	0.391582	0	0.232115	0.461096	0.170189	0.629423	0.488567	0.4572	0.490259	0.369042	0.434244
CG34401	6	0.78349	0.59851	0.916976	1	0.733473	0.477585	0.507754	0.53297	0.369606	0.35977	0.0640404	0
CG34449	2	1	0.516141	0.383343	0.467369	0.248005	0	0.214395	0.417621	0.214186	0.542019	0.396344	0.228663
stumps	5	0	0.726458	1	0.916451	0.952369	0.872462	0.989067	0.968191	0.778137	0.660733	0.522591	0.554482
Trf2	6	0.744503	1	0.891532	0.617287	0.599976	0	0.634658	0.413895	0.474665	0.191036	0.506712	0.507508
CG9915	6	0.844765	1	0.803016	0.792205	0.754964	0.549996	0.464292	0.118918	0.0425255	0.00214489	0	0.0309474
CG12795	1	1	0.204407	0.139186	0.171877	0.18613	0.266386	0.135252	0.0337772	0	0.0604175	0.0705466	0.0724089
Cip4	3	0.46193	0.606704	0	0.544483	0.681335	0.905741	1	0.711868	0.492072	0.15029	0.0941729	0.119027
nudE	2	1	0.905078	0.730991	0.623244	0.725929	0.107201	0.671446	0.148086	0.232763	0	0.152166	0.520973
CG7900	2	0	0.348554	1	0.388557	0.49759	0.572567	0.688069	0.208253	0.337692	0.383904	0.195267	0.410316
CG14688	3	0	0.397024	1	0.745091	0.891281	0.851262	0.752525	0.982518	0.888481	0.292958	0.227965	0.175973
CG6118	4	0	0.0222756	0.0286417	0.191951	0.245649	0.489418	0.823129	1	0.633877	0.290574	0.0718932	0.0968053
CG6051	5	1	0.70957	0	0.294823	0.372481	0.25752	0.157249	0.764308	0.831861	0.668589	0.665579	0.342289
LpR2	4	0.99521	0.755359	0.118499	0	0.13129	0.0147809	0.237226	0.466421	0.671133	0.911786	0.918206	1
Gfat1	4	0	0.0304611	0.0328095	0.128102	0.255948	0.501477	0.608621	0.791751	1	0.903449	0.844676	0.891867
CG40160	5	0.765145	0.6777	0.167042	0	0.207152	0.188531	0.626119	0.562229	0.841849	0.759139	0.869668	1
jing	2	0.349269	0.669951	0.778955	1	0.938787	0.600553	0.637026	0.412738	0.18434	0.0937514	0.0511459	0
CG10353	4	0.23286	0	0.36829	0.620994	0.678034	0.877468	0.938623	0.883514	0.852009	0.965717	0.978183	1
CG11593	2	1	0.461849	0.796441	0.657928	0.503523	0.309086	0.318921	0.204218	0.190353	0.196313	0	0.0750982
pes	1	1	0	0.285423	0.360717	0.23112	0.357755	0.381207	0.241467	0.234869	0.339175	0.388411	0.505699
CG5180	6	1	0.697035	0.642812	0.731145	0.668634	0.382065	0.364634	0.498487	0.290231	0	0.240202	0.143967
CG6026	4	0	0.00692258	0.0676916	0.13204	0.202926	0.302008	0.723008	1	0.589786	0.226105	0.0342355	0.0702757
CG12964	4	0	0.0398554	0.0348963	0.065216	0.162564	0.168941	0.410119	0.931004	1	0.747003	0.170594	0.219739
CG7504	6	1	0.641803	0.699487	0.608594	0.568673	0.268643	0.414407	0.275712	0.214687	0	0.262288	0.325788
alpha-Est10	4	0.60224	0	0.00326845	0.0188203	0.0636564	0.316192	0.662316	0.942606	1	0.574338	0.515996	0.563475
svr	1	0.977732	0.866971	0.425036	0.355445	0.540141	0	0.513545	0.337524	0.910259	0.692672	0.67327	1
CG5321	4	0	0.057442	0.0449903	0.310973	0.445132	0.833014	0.903136	1	0.630138	0.364886	0.192709	0.20789
CG9449	5	0	0.107178	0.248518	0.578298	0.680475	0.771583	0.743664	0.589809	0.514656	0.680075	1	0.983204
hang	6	0.869124	1	0.720814	0.696431	0.543844	0.135006	0.231949	0.467782	0.336943	0	0.667703	0.405434
CG42232	6	0.720607	0.635924	1	0.867868	0.70474	0.170715	0.455411	0.23044	0.208226	0	0.350232	0.344345
CG1024	6	0.912703	1	0.845533	0.744011	0.716133	0.577911	0.447698	0.358609	0.251605	0	0.446941	0.378627
yki	2	1	0.192298	0.785654	0.912377	0.709562	0.531142	0.575835	0.177378	0.0803309	0.22645	0.0694914	0
slam	1	0.604116	1	0.224366	0.129053	0.189069	0.0688451	0.111522	0.18059	0.113287	0	0.196201	0.176617
cup	1	1	0.682431	0.277177	0.216827	0.183488	0.083617	0.104527	0.0888314	0.0224694	0	0.046339	0.0282121
corn	6	0	0.785377	1	0.801494	0.722074	0.719827	0.610894	0.357687	0.173771	0.111479	0.0416324	0.0922638
bun	5	0.82988	0.502633	0.103897	0.0561623	0	0.268656	0.465296	0.357266	0.623422	1	0.792115	0.823816
Mlp60A	4	0.134583	0	0.0236621	0.172527	0.310522	0.507823	0.625131	0.867595	0.968031	1	0.972435	0.941594
Csk	3	1	0.270727	0.108467	0.42467	0.465291	0	0.381305	0.625578	0.724695	0.745508	0.676865	0.741018
CG42327	4	0.705032	0.227999	0	0.360261	0.529091	0.417526	0.530202	0.867993	0.963876	1	0.943581	0.922496
AGO3	2	0.892668	1	0.582504	0.310438	0.534831	0.272162	0.554749	0.128612	0.426914	0	0.436952	0.620541
CG42354	1	0.929654	1	0.70833	0.602522	0.723107	0.740568	0.831445	0.756046	0.816144	0	0.133594	0.886433
CG42360	6	0.763711	1	0.796535	0.602391	0.752996	0.531915	0.731261	0.161923	0.341965	0	0.708076	0.734375
CG42388	1	1	0.278169	0.15443	0.512313	0.572519	0.522976	0.496292	0.297543	0.237607	0.130664	0	0.090978
Sug	2	0.946978	0.865675	0.663248	1	0.927205	0.861605	0.874204	0.919729	0.679241	0	0.11575	0.293048
oc	2	0	0.955172	0.784246	1	0.980795	0.958867	0.881027	0.558874	0.543298	0.579749	0.413202	0.365211
CG6967	1	1	0.425598	0.139457	0.0599186	0.0832667	0	0.0361856	0.0292914	0.0367584	0.0285407	0.00967254	0.0630839
CG7091	1	1	0.26212	0.148082	0.0801096	0.121783	0.0748795	0.0755924	0.105388	0.039369	0.0276953	0	0.00791531
kon	5	0	0.222602	0.477095	0.708395	0.865199	0.740892	1	0.791477	0.683725	0.515779	0.423965	0.512379
Duox	1	1	0.185855	0	0.338781	0.603725	0.665383	0.720259	0.781822	0.691562	0.657587	0.42737	0.441217
CG42487	2	1	0.595702	0.440245	0.504928	0.466239	0.287635	0.354415	0.00081398	0	0.0417203	0.100839	0.153466
CG32638	6	0.665672	0.621108	0.432839	0.732845	1	0.877486	0.63908	0.26817	0.294827	0	0.198177	0.289827
Nedd4	1	1	0.425179	0.347376	0.216572	0.224575	0.25855	0.173023	0	0.17365	0.227731	0.313226	0.404635
cno	6	0.773878	1	0.652013	0.767022	0.706766	0.0387267	0.390463	0.700578	0.450391	0	0.405322	0.191104
grh	3	0	0.711476	0.82374	0.99868	1	0.929991	0.928863	0.846386	0.722377	0.875019	0.735664	0.72807
ATPCL	3	0.659671	0	0.525537	0.472662	0.291047	0.44256	0.753038	1	0.277312	0.0205778	0.319674	0.407446
betaTub97EF	4	0.0282946	0.0100497	0	0.285226	0.426048	0.69594	0.730447	0.818995	0.776723	0.872959	1	0.962964
CG1319	3	0.87778	0	0.0425603	0.148345	0.15553	0.43386	0.433574	0.511542	0.584575	0.68514	0.929001	1
CG18586	1	1	0.353736	0.0993839	0.0391346	0.0801171	0.0194789	0.0294365	0.0480681	0	0.0175459	0.0126223	0.0285244
CG4041	2	1	0.426285	0.568488	0.669064	0.68842	0.688261	0.543844	0.495913	0.208489	0.166957	0.0130697	0
CG34133	2	1	0.387789	0.325569	0.286134	0.185582	0.0362304	0.142501	0.0134888	0.032803	0	0.00455649	0.0809061
CG11307	6	0.864438	1	0.710362	0.23214	0.427227	0.244112	0.404806	0.31993	0.291673	0	0.3067	0.338101
CG9171	5	0.655364	0	0.176735	0.364475	0.510736	0.700773	0.66623	0.543193	0.812039	1	0.670721	0.702172
CG9650	2	0.732682	0.0554858	0.215718	1	0.902986	0.586346	0.570479	0.507529	0.332362	0.316522	0.0707837	0
dsd	2	1	0.544448	0.47529	0.440458	0.391208	0.443699	0.692877	0.594365	0.175662	0.0812624	0.0788084	0
KP78a	6	0.175937	0.935204	1	0.91783	0.838479	0.69017	0.582506	0.363052	0.21104	0.191559	0	0.0499639
MCPH1	2	1	0.430658	0.695223	0.678217	0.565711	0.257069	0.293664	0.065474	0	0.00103119	0.13977	0.154838
olf413	5	0	0.347684	0.699328	0.892933	0.943822	0.91213	1	0.979223	0.810656	0.75177	0.621013	0.635978
Spindly	2	0.854733	0.658797	1	0.970914	0.826583	0.50361	0.458208	0.137925	0.107804	0.0695192	0	0.0631185
Ppn	5	0	0.158703	0.343915	0.644686	0.725508	0.76871	0.891411	1	0.988784	0.967147	0.755234	0.757339
lbk	3	0	0.132328	0.76193	1	0.921958	0.848519	0.750534	0.504852	0.317917	0.224541	0.282799	0.324781
drongo	6	0.268712	0.580238	1	0.402791	0.0578302	0	0.209436	0.568099	0.239819	0.178564	0.043341	0.0775228
CG16734	2	1	0.848116	0.668567	0.575296	0.554747	0.492224	0.481102	0.22798	0.158496	0.0597942	0	0.0561937
Sh3beta	6	0.121031	0.154333	0.649896	0.921067	0.99197	0.958932	1	0.407724	0.358281	0.162035	0	0.170991
yellow-e2	5	0	0.285268	0.575431	0.880153	1	0.968115	0.791092	0.256911	0.203413	0.48442	0.425309	0.448823
Ank2	4	0	0	0.127693	0.495397	0.742359	0.870985	0.968969	0.996766	1	0.986378	0.932708	0.930293
CG6136	6	0.787345	0.722833	1	0.841511	0.668063	0.737718	0.472667	0.415047	0.196985	0.139505	0	0.0404304
dikar	2	0.766765	1	0.901551	0.752103	0.742921	0.0800428	0.475885	0.580429	0.297912	0	0.279302	0.173818
chinmo	4	0.0321679	0.0385582	0	0.185204	0.337052	0.420554	0.62091	0.79986	0.913089	1	0.809233	0.803178
pros	2	0	0.636837	0.782091	1	0.905137	0.718323	0.729098	0.656346	0.524329	0.48512	0.368313	0.325566
CG11839	6	0.999796	0.91497	1	0.893133	0.822042	0.767342	0.657004	0.195629	0.169861	0.016834	0	0.0433077
mbc	6	0.482917	0.509712	1	0.962376	0.954241	0.658752	0.787803	0.329843	0.430078	0.33278	0	0.142947
vas	2	1	0.315492	0.102926	0.1203	0.144032	0.155493	0.185227	0.127276	0.0805234	0	0.120945	0.144079
Ect4	4	0.568837	0.233932	0.0122674	0	0.273197	0.432716	0.649798	0.573883	0.844779	0.98621	0.983256	1
CG4009	1	0	1	0.810736	0	0	0.912648	0.55362	0	0.233884	0.213818	0	0
pyd	6	0.41565	0.911779	0.932201	1	0.863967	0.362075	0.563041	0.809032	0.574061	0.104645	0.09755	0
cp309	3	0	0.406409	0.257118	0.574775	0.696326	0.622715	1	0.55918	0.457261	0.421839	0.23961	0.354541
ash1	2	1	0.631366	0.789265	0.634281	0.648926	0.0958772	0.606602	0.450005	0.314989	0	0.352103	0.478867
wun	5	0.186654	0.0527452	0	0.0433562	0.282586	0.611779	0.75472	0.879002	1	0.743346	0.681501	0.759281
l(2)gd1	1	1	0	0.0493253	0.263542	0.365519	0.268307	0.451623	0.186379	0.255821	0.31542	0.329855	0.512376
milt	1	1	0.997994	0.484938	0.252031	0.241109	0.180988	0.0299031	0.0617601	0	0.0199105	0.11779	0.0444729
Ptpmeg	6	0.767955	1	0.796651	0.765541	0.687061	0.626295	0.595821	0.609516	0.318685	0	0.255948	0.142529
nuf	5	0.737867	0.539113	0	0.461025	0.511302	0.426644	1	0.609391	0.782351	0.553383	0.48762	0.682624
Mf	4	0.0652612	0.00920602	0	0.0276871	0.148402	0.19579	0.278875	0.659495	0.84653	0.947057	1	0.974391
tmod	3	0	0.198497	0.605631	0.529037	0.613029	0.824552	1	0.795487	0.872026	0.82379	0.813352	0.940836
BtbVII	2	1	0.58137	0.296589	0.408369	0.323851	0.2076	0.0708577	0.106393	0.0557706	0.272904	0.123653	0
CG32106	1	0	0.184465	0.178902	0.137216	0.493884	0.251873	1	0	0	0.116884	0	0.249807
hts	5	0.400768	0	0.486319	0.728388	0.761505	0.90804	0.993362	1	0.70732	0.439428	0.286229	0.235144
Calx	5	1	0.291187	0.0229522	0	0.0501489	0.108286	0.21863	0.455022	0.635053	0.76335	0.822965	0.786733
CG13742	2	0.83184	0.99906	1	0.915301	0.864676	0.367161	0.596491	0.196509	0.245429	0	0.363496	0.43432
CG13185	2	0.750541	0.558687	1	0.879658	0.850092	0	0.588977	0.134186	0.115744	0.00791929	0.650424	0.628429
Rpb4	6	0.736083	0.993626	0.957297	1	0.856449	0.872942	0.811006	0.220581	0.206082	0.0716526	0	0.266743
Su(var)3-9	6	0.592417	0.428079	0.864457	0.855669	0.842122	1	0.646401	0.545544	0.263462	0.0381999	0.0851244	0
CG34422	6	0.486335	0.932211	0.908686	1	0.682242	0.445581	0.355062	0.616944	0.364983	0.20369	0.304936	0
Dab	6	0.638194	0.928181	1	0.666389	0.381653	0.0117307	0.46176	0.528695	0.256272	0	0.343275	0.194412
cpo	5	0.00467273	0.0335043	0	0.496037	0.383406	0.485301	0.505663	1	0.848285	0.869864	0.167118	0.274907
sli	3	0	0.780723	1	0.988298	0.951872	0.876863	0.931433	0.97758	0.818231	0.710517	0.471786	0.483154
CG8677	6	0.948775	0.865109	0.896872	1	0.802238	0.156235	0.538239	0.343589	0.306783	0	0.325737	0.216034
dp	4	0	0.103348	0.34146	0.692186	0.65041	0.259267	0.658225	0.917203	0.962085	1	0.784349	0.733081
CG8028	5	0	0.329535	0.80827	0.965959	1	0.634466	0.385055	0.409294	0.640301	0.884528	0.942607	0.827232
ab	5	0	0.353136	0.631345	0.957783	0.991851	0.944761	1	0.873866	0.651134	0.632291	0.660976	0.640541
CG17493	6	0.58571	0.824197	1	0.871839	0.985725	0.89427	0.861429	0.114426	0.365117	0	0.272037	0.493238
tral	1	1	0.717473	0.445391	0.389965	0.31893	0.154298	0.221868	0.240345	0.123562	0	0.156691	0.0522927
CG9380	4	0	0.0601333	0.156211	0.241031	0.337271	0.45516	0.698512	0.788582	1	0.990855	0.869532	0.9493
Hr4	5	0.0827307	0.065932	0	0.396053	0.492515	0.787504	0.921523	1	0.567679	0.32014	0.0581909	0.0282531
CG12090	5	0.318352	0	0.629747	1	0.911871	0.443357	0.660302	0.577099	0.609565	0.555853	0.463737	0.479427
Glut1	4	0.845989	0.340325	0	0.145945	0.441791	0.886462	1	0.947158	0.793296	0.756712	0.839423	0.85265
CG3961	4	0	0.08769	0.24574	0.495136	0.547449	0.787732	0.770678	0.72667	0.78822	0.799921	1	0.984124
Smr	6	0.950389	1	0.332545	0.395898	0.36038	0	0.226213	0.634796	0.398459	0.282686	0.491503	0.203967
Ncc69	4	0	0.144113	0.281789	0.736202	0.852963	0.974916	0.96454	0.828459	0.907685	1	0.859323	0.876074
btsz	3	0	1	0.763174	0.635897	0.613227	0.530654	0.594179	0.514053	0.477986	0.45866	0.350736	0.404059
Alh	2	0.926228	0.778071	0.550107	0.874768	0.88133	0.886998	1	0.806257	0.330977	0.135165	0.170575	0
CG6475	2	0	0.363333	1	0.648299	0.430524	0.149174	0.10688	0.0254029	0.00631608	0.0125395	0.0473174	0.088343
CG1161	1	0.509257	0.763829	0.89472	0.93945	0.879194	1	0.372516	0.251069	0.23495	0.375921	0.0952763	0
CG31522	5	0.0970834	0	0.19705	0.330813	0.368396	0.419324	0.485504	0.745157	1	0.718118	0.350738	0.378422
koi	3	0.58405	0.180571	0.251331	0.409928	0.320264	0.532555	0.370629	0	0.375061	1	0.793439	0.907794
Strn-Mlck	5	0	0.160762	0.349103	0.319555	0.299682	0.521766	0.771045	1	0.951588	0.948719	0.809362	0.857572
CG34417	5	0	0.0200143	0.0948034	0.27859	0.415463	0.57441	0.845633	0.969503	1	0.95724	0.904317	0.920933
Cdep	5	0	0.534886	0.916123	0.929217	0.910703	0.931249	1	0.961055	0.896674	0.910439	0.914532	0.909717
fon	4	0.0184145	0.00771702	0	0.00830293	0.0700018	0.0689039	0.0682753	0.406634	0.681225	0.899958	1	0.964892
Glycogenin	3	0.157315	0.240314	0.000256601	0	0.162769	0.304099	0.542191	0.734658	0.958632	1	0.848034	0.873719
Lnk	6	0.940679	1	0.618153	0.620257	0.566982	0.427807	0.348158	0.245131	0	0.189161	0.584977	0.512862
CG2943	1	0.858258	1	0.634577	0.684116	0.758603	0.712888	0.621935	0.61311	0.434739	0.184132	0.025654	0
CG33181	1	1	0.761435	0.180455	0	0.109399	0.0716132	0.136455	0.418471	0.427658	0.558966	0.810581	0.724465
yin	1	1	0.190662	0.0773684	0	0.0671076	0.0537955	0.176827	0.188053	0.193636	0.354082	0.179196	0.223989
CG30109	5	1	0.134185	0	0.236261	0.395387	0.681698	0.646478	0.730389	0.735553	0.805539	0.778851	0.731172
trol	4	0	0.0500646	0.0644627	0.105944	0.179446	0.300238	0.559506	0.806318	0.929831	1	0.916553	0.89995
Kr-h1	5	0	0.0828681	0.0408239	0.489752	0.586228	0.941623	1	0.845389	0.594765	0.563714	0.588078	0.549206
fau	4	0.0343356	0.0297079	0	0.055771	0.126639	0.172457	0.27511	0.572737	0.728471	0.919201	1	0.964194
cn	2	0.166991	0.247809	0.633795	1	0.835337	0.421053	0.208193	0.0324587	0	0.0748367	0.227758	0.191971
Fas3	5	0	0.187798	0.270665	0.716963	0.868179	0.988968	1	0.998537	0.918639	0.810282	0.52639	0.521853
Tequila	4	0	0.042662	0.128588	0.352582	0.388595	0.326924	0.473461	0.656898	0.847533	0.858599	0.944277	1
CG1667	2	0.886173	1	0.612752	0.567044	0.585757	0.354055	0.532226	0.358434	0.347519	0	0.528352	0.518597
